# Supplementary material for: Distinct stage-specific transcriptional states of B cells derived from human tonsillar tissue
Source: PubMed Central journal article supplement (PMC10132144; doi:10.1172/jci.insight.155199), 2023-04-10
Supplement: jciinsight-8-155199-s225.pdf [file jciinsight-8-155199-s225.pdf]

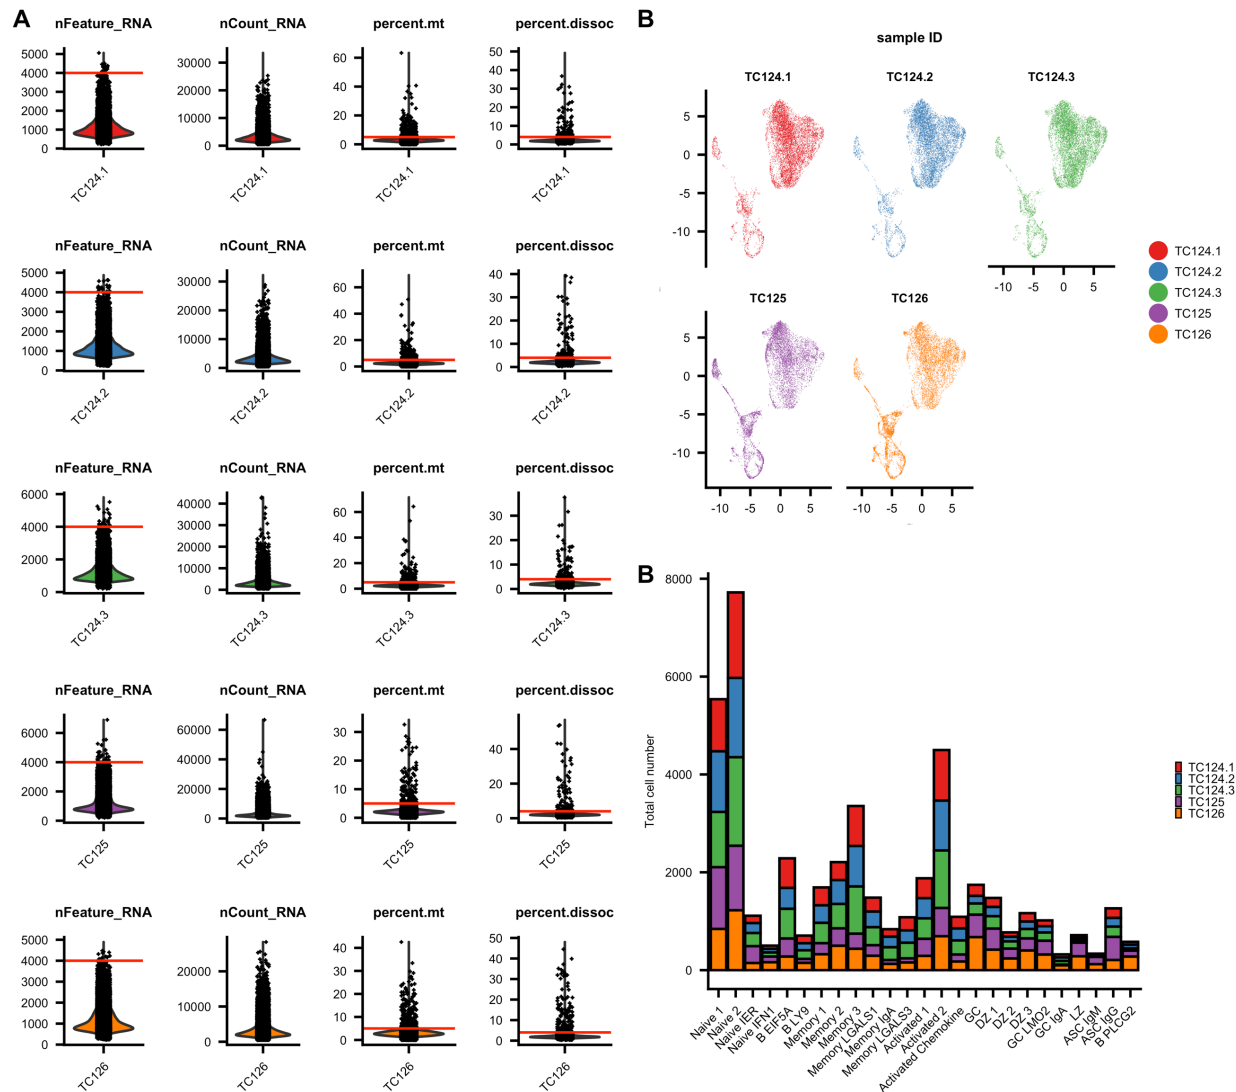

1  
2 **Figure S1. Preprocessing of scRNA-seq data.** (A) Quality control metrics from five samples (3  
3 biological replicates of TC124) with red horizontal lines denoting cutoffs used for downstream  
4 processing of scRNA-seq data. (B) UMAP projection of 45,376 single B-cell transcriptomes,  
5 colored and split by sample and/or donor. (C) Distribution of sample origin for cells within each  
6 cluster identified from **Fig. 1C**.

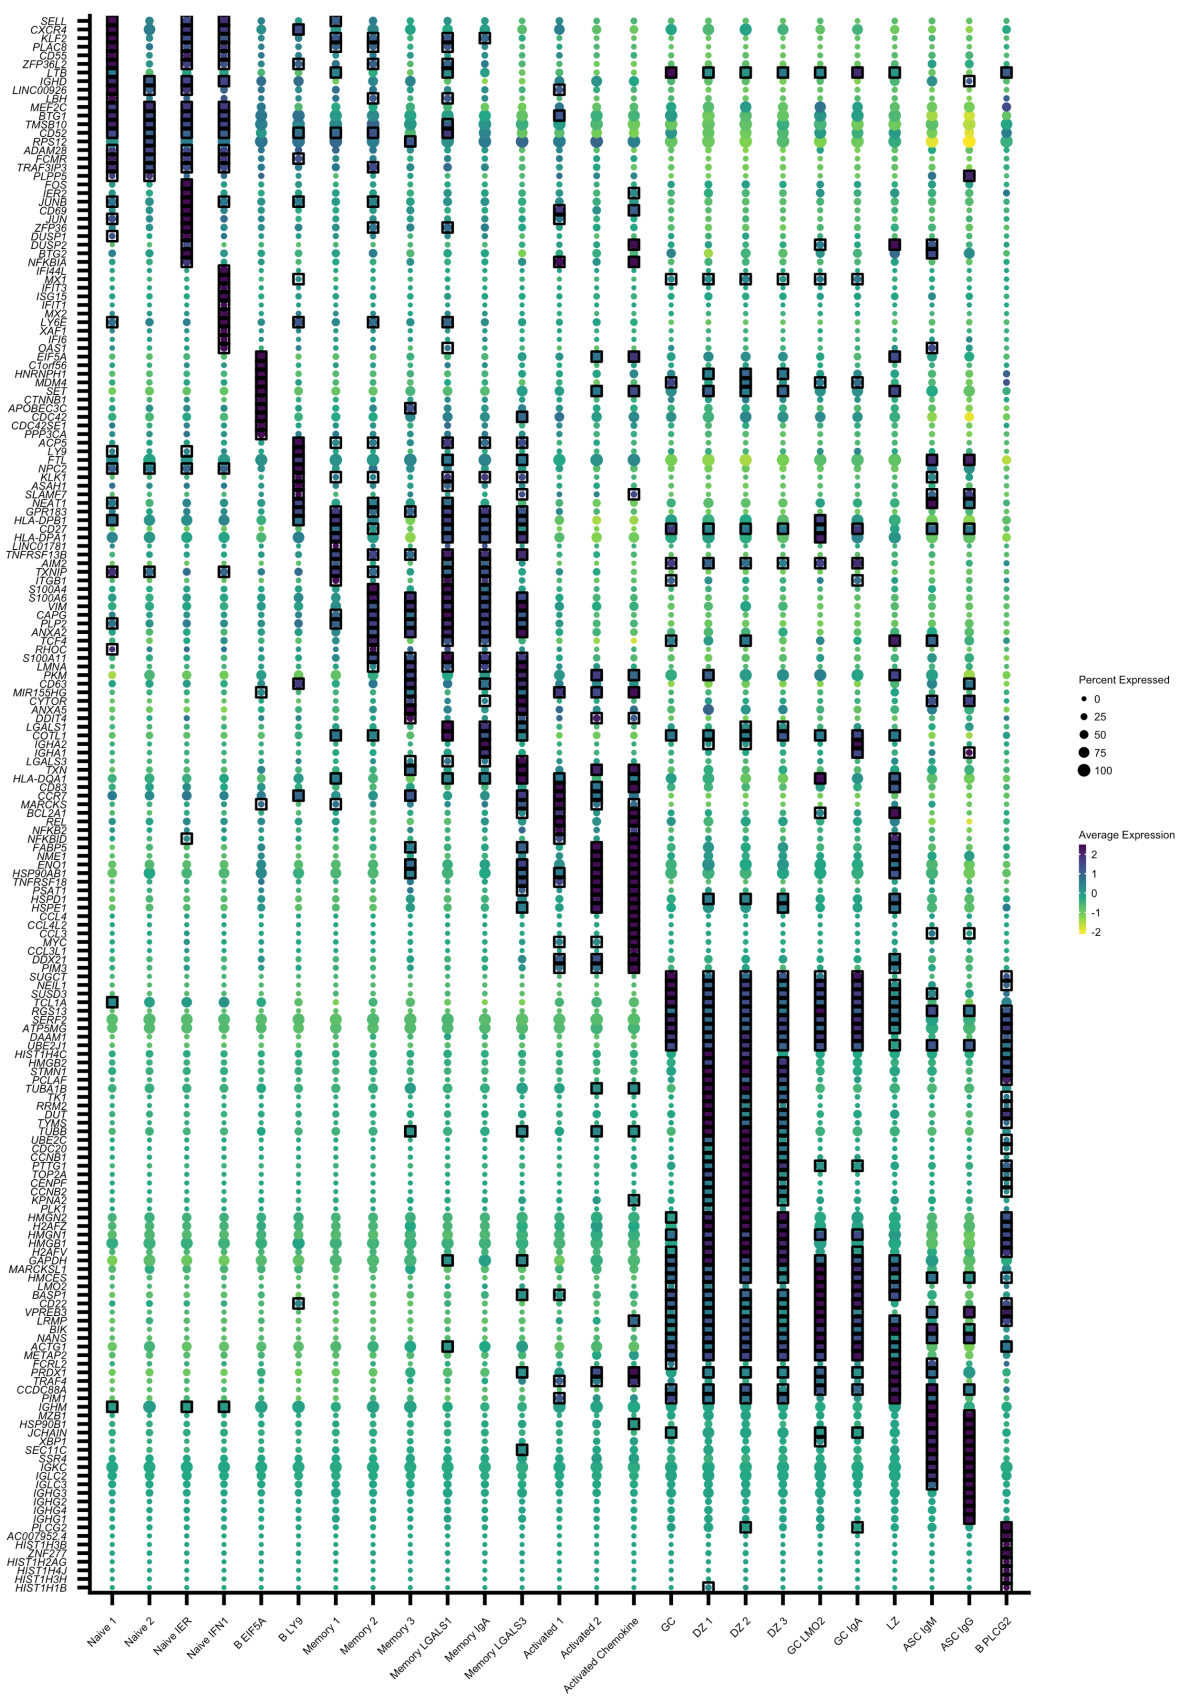

8 **Figure S2. Average expression of top 10 marker-genes for each cluster.** Top 10 marker-gene  
9 average expression (scaled log normalized counts) for each cluster. At least 10 marker-genes will  
10 be shown for each cluster. Genes were denoted as marker-genes if their average log<sub>2</sub> fold-change  
11 was > 0.3 for the cluster of interest and adjusted p-value was < 0.01 (likelihood-ratio test). Marker-  
12 gene expression is denoted by square boxes on gene-cluster pairs.  
13

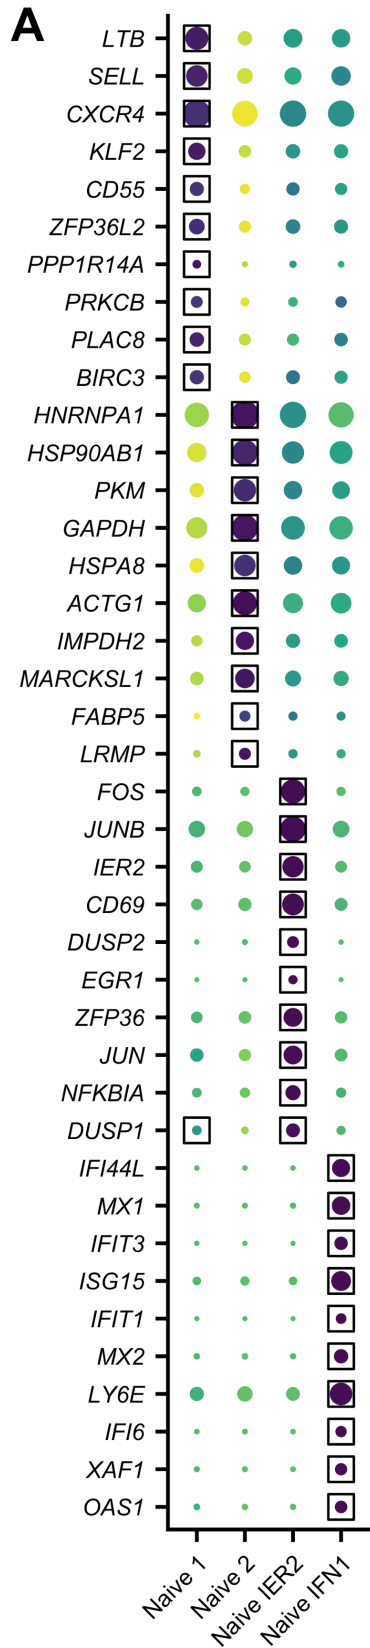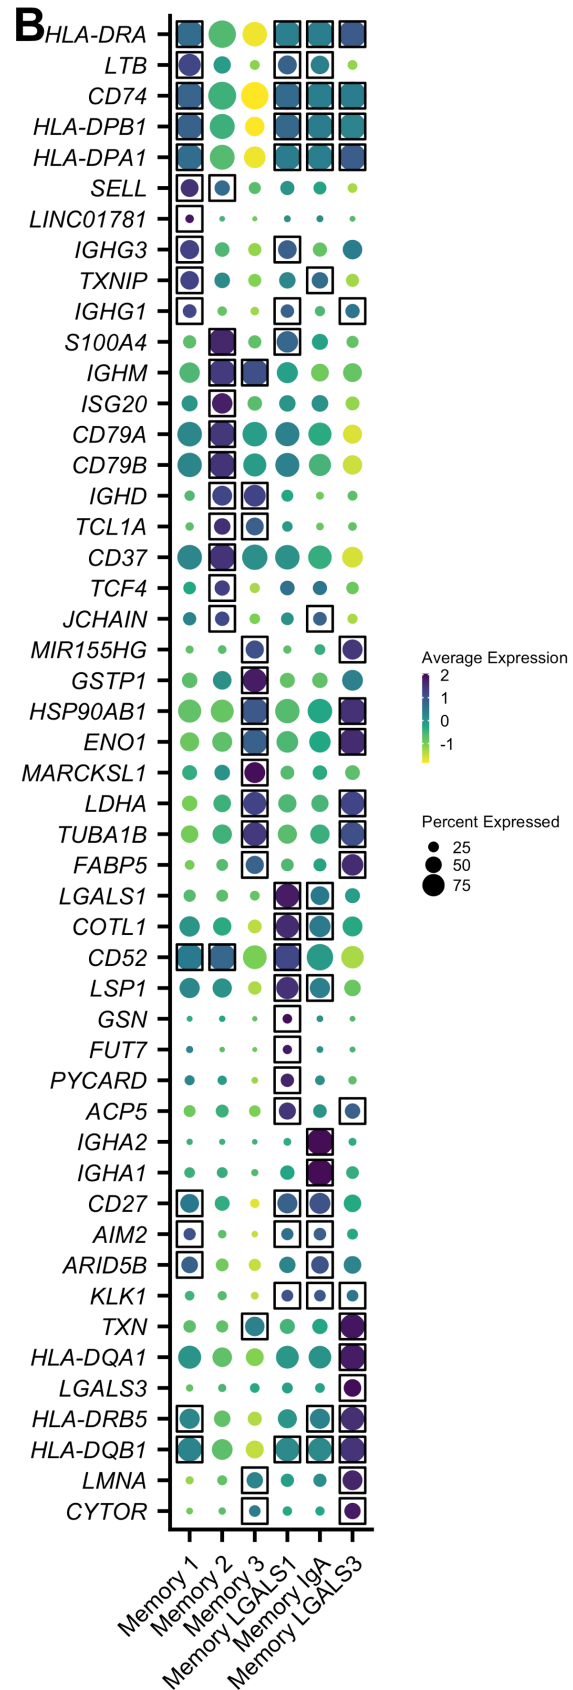

15 **Figure S3. Memory-cell differential expression analysis.** Marker-genes were determined for  
16 solely the memory-cell clusters (restricting comparisons to within the 6 clusters). Top 10 marker-  
17 gene average expression (scaled log normalized counts) for each cluster. At least 10 marker-genes  
18 will be shown for each cluster. Genes were denoted as marker-genes if their average log2 fold-  
19 change was  $> 0.3$  for the cluster of interest and adjusted p-value was  $< 0.01$  (likelihood-ratio test).  
20 Marker-gene expression is denoted by square boxes on gene-cluster pairs.

21

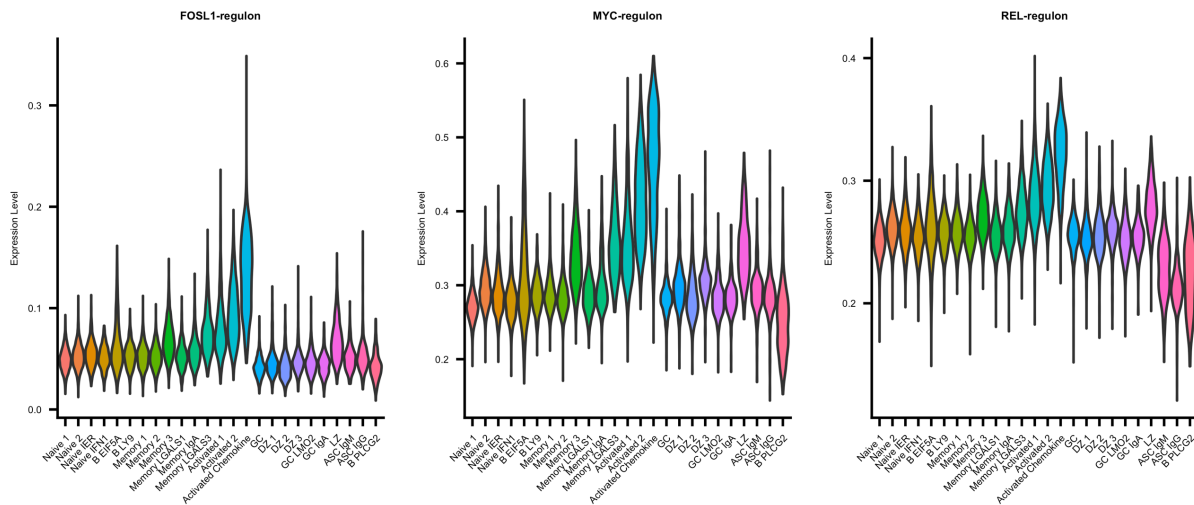

22

23 **Figure S4. MYC, REL, and FOSL1 regulon activities across clusters.** Violin plots of AUCell  
24 scores for the MYC, REL, and FOSL1 regulons across all clusters identified in **Fig. 1B**.

25

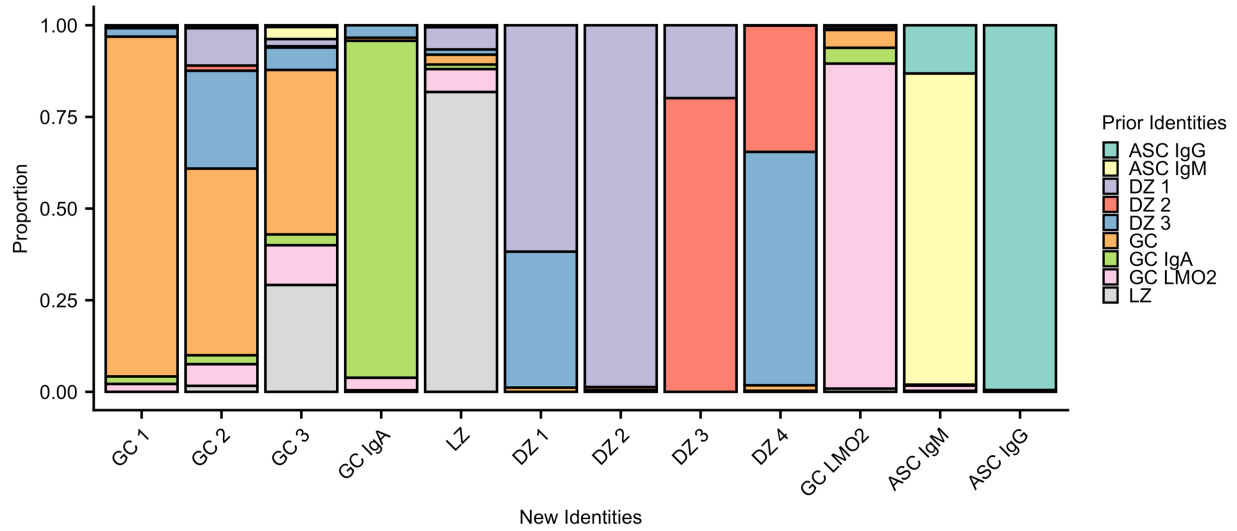

26

27 **Figure S5. Proportions of original clusters in new clusters.** Proportion of original cluster  
 28 identities (from **Fig. 1B**) across new cluster identities (from **Fig. 3A**).

29

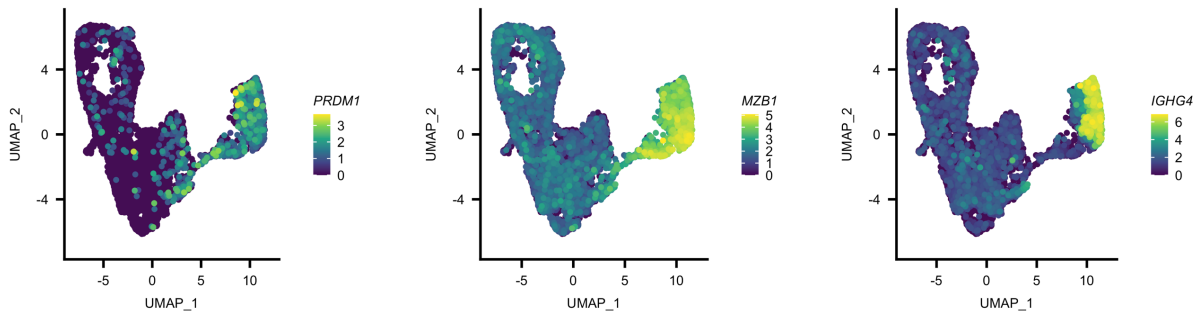

30

31 **Figure S6. Gene expression levels of *PRDM1*, *MZB1*, and *IGHG4* in GC and ASC clusters.**

32 Gene expression levels of *PRDM1*, *MZB1*, and *IGHG4* (log normalized counts) gene expression  
 33 overlaid on cells in the UMAP projection in **Fig. 3A-B**.

34

35

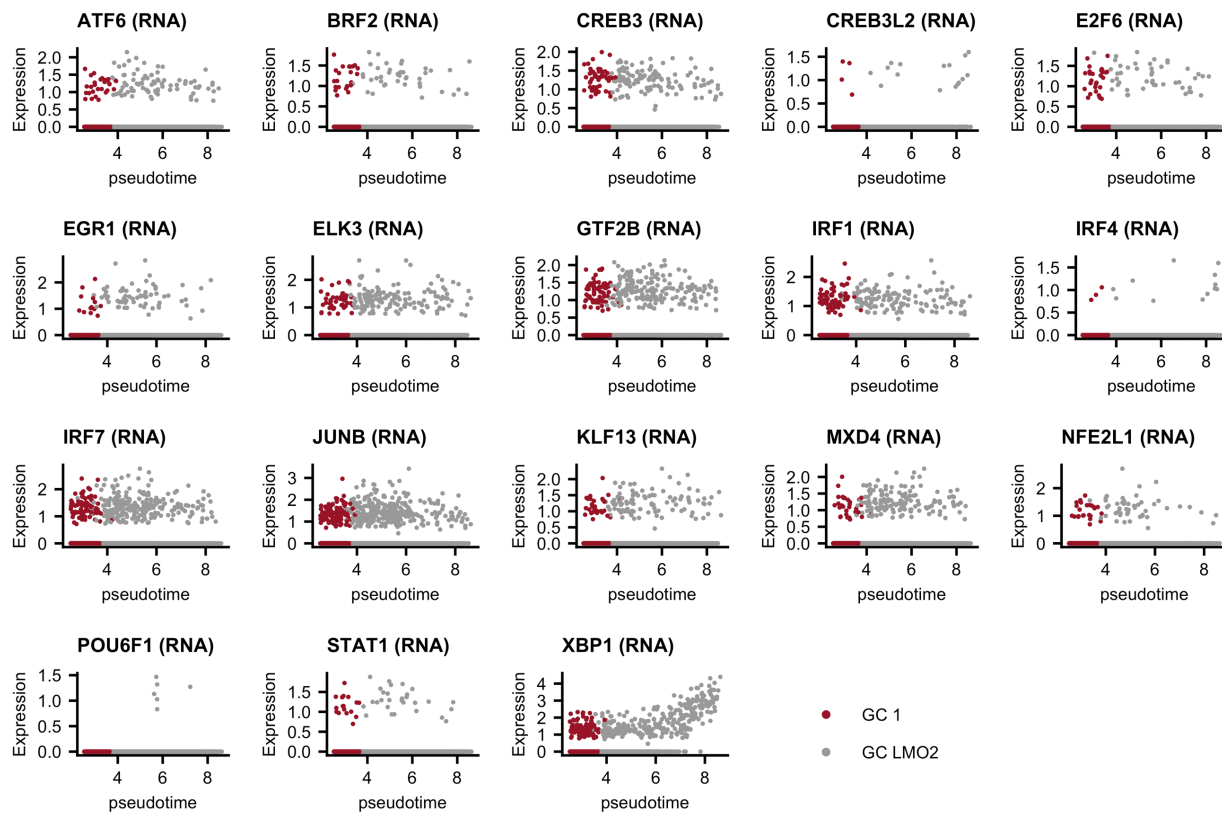

36

37 **Figure S7. Gene-level expression of select TFs along the GC-to-ASC pseudotemporal axis.**

38 Gene expression levels along the GC-to-ASC pseudotemporal axis for the TF regulon activities

39 plotted in **Fig. 3f**.

40

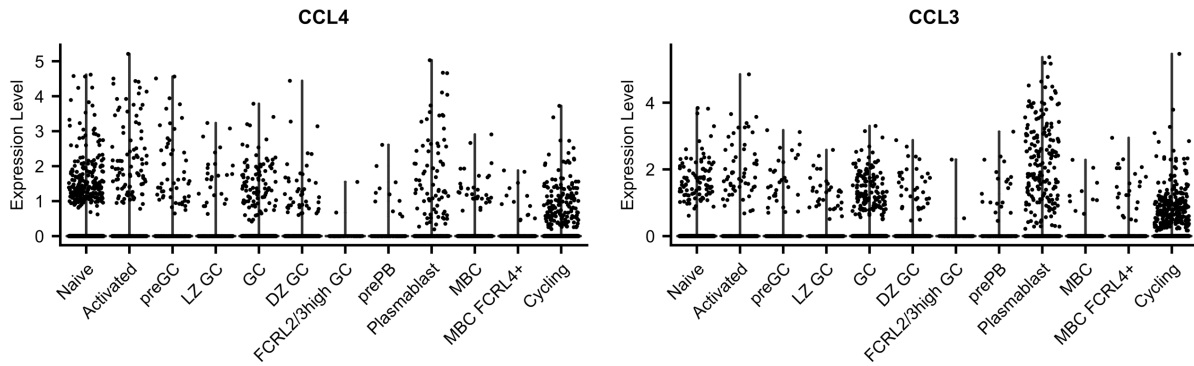

41

42 **Figure S8. *CCL4* and *CCL3* gene expression within the King HW et al. dataset.**

43 Gene expression levels across defined clusters in the dataset provided in King HW et al (5). A  
44 distinct *CCL4/CCL3* co-expressing population is not identified.

45

46



47 **TABLE LEGENDS**

48 **Table S1. Donor information (n = 3) and cells recovered per 10X sample.**

49 **Table S2. Cluster distribution across donors.**

50 **Table S3. Coarse group distribution across donors.**

51 **Table S4. Likelihood-ratio test gene differential expression results.**

52 **Table S5. Donor information (n=3) for each bulk RNA-seq sample.**

53 **Table S6. Identified gene signatures (BCR-only, CD40-only, BCR/CD40) from bulk RNA-**  
54 **seq.**

55 **Table S7. Wilcoxon rank sum test regulon differential expression results.**

56 **Table S8. TF-Target pairs from SCENIC pipeline.**

57 **Table S9. *tradeSeq* association test results for GC to ASC trajectory gene differential**  
58 **expression.**

59 **Table S10. List of transcription factors tested in SCENIC pipeline.**
