# Supplementary material for: Distinct stage-specific transcriptional states of B cells derived from human tonsillar tissue
Source: PubMed Central journal article supplement (PMC10132144; doi:10.1172/jci.insight.155199), 2023-04-10
Supplement: jciinsight-8-155199-s226.pdf [file jciinsight-8-155199-s226.pdf]

| Sample Name               | Sex    | Age | 10X Lanes | Final Cells         |
|---------------------------|--------|-----|-----------|---------------------|
| Recovered post-processing |        |     |           |                     |
| TC124                     | Male   | 4   | 3         | "8912, 8962, 10183" |
| TC125                     | Female | 17  | 1         | 8491                |
| TC126                     | Male   | 5   | 1         | 8828                |
