# Supplementary material for: Distinct stage-specific transcriptional states of B cells derived from human tonsillar tissue
Source: PubMed Central journal article supplement (PMC10132144; doi:10.1172/jci.insight.155199), 2023-04-10
Supplement: jciinsight-8-155199-s227.pdf [file jciinsight-8-155199-s227.pdf]

| donor | cluster_name        | count |     |
|-------|---------------------|-------|-----|
| TC124 | Naive 1             | 3433  |     |
| TC124 | Naive 2             | 5179  |     |
| TC124 | Naive IER2          | 622   |     |
| TC124 | Naive IFN1          | 223   |     |
| TC124 | B EIF5A             | 1640  |     |
| TC124 | B LY9               | 477   |     |
| TC124 | Memory 1            | 1140  |     |
| TC124 | Memory 2            | 1353  |     |
| TC124 | Memory 3            | 2609  |     |
| TC124 | Memory LGALS1       | 973   |     |
| TC124 | Memory IgA          | 630   |     |
| TC124 | Memory LGALS3       | 839   |     |
| TC124 | Activated           | 1238  |     |
| TC124 | Activated NME1      | 3228  |     |
| TC124 | Activated Chemokine |       | 771 |
| TC124 | GC                  | 611   |     |
| TC124 | DZ 1                | 627   |     |
| TC124 | DZ 2                | 332   |     |
| TC124 | DZ 3                | 517   |     |
| TC124 | GC LM02             | 417   |     |
| TC124 | GC IgA              | 211   |     |
| TC124 | LZ                  | 154   |     |
| TC124 | ASC IgM             | 68    |     |
| TC124 | ASC IgG             | 584   |     |
| TC124 | B PLCG2             | 181   |     |
| TC125 | Naive 1             | 1263  |     |
| TC125 | Naive 2             | 1319  |     |
| TC125 | Naive IER2          | 344   |     |
| TC125 | Naive IFN1          | 117   |     |
| TC125 | B EIF5A             | 369   |     |
| TC125 | B LY9               | 81    |     |
| TC125 | Memory 1            | 226   |     |
| TC125 | Memory 2            | 357   |     |
| TC125 | Memory 3            | 310   |     |
| TC125 | Memory LGALS1       | 216   |     |
| TC125 | Memory IgA          | 80    |     |
| TC125 | Memory LGALS3       | 86    |     |
| TC125 | Activated           | 349   |     |
| TC125 | Activated NME1      | 578   |     |
| TC125 | Activated Chemokine |       | 143 |
| TC125 | GC                  | 458   |     |
| TC125 | DZ 1                | 431   |     |
| TC125 | DZ 2                | 202   |     |
| TC125 | DZ 3                | 247   |     |
| TC125 | GC LM02             | 282   |     |
| TC125 | GC IgA              | 14    |     |
| TC125 | LZ                  | 278   |     |
| TC125 | ASC IgM             | 147   |     |
| TC125 | ASC IgG             | 472   |     |

|       |                     |      |     |
|-------|---------------------|------|-----|
| TC125 | B PLCG2             | 122  |     |
| TC126 | Naive 1             | 842  |     |
| TC126 | Naive 2             | 1223 |     |
| TC126 | Naive IER2          |      | 146 |
| TC126 | Naive IFN1          |      | 161 |
| TC126 | B EIF5A             | 277  |     |
| TC126 | B LY9               | 148  |     |
| TC126 | Memory 1            | 325  |     |
| TC126 | Memory 2            | 498  |     |
| TC126 | Memory 3            | 436  |     |
| TC126 | Memory LGALS1       |      | 293 |
| TC126 | Memory IgA          |      | 127 |
| TC126 | Memory LGALS3       |      | 156 |
| TC126 | Activated           |      | 291 |
| TC126 | Activated NME1      |      | 693 |
| TC126 | Activated Chemokine |      | 176 |
| TC126 | GC                  | 675  |     |
| TC126 | DZ 1                | 418  |     |
| TC126 | DZ 2                | 238  |     |
| TC126 | DZ 3                | 401  |     |
| TC126 | GC LM02             | 318  |     |
| TC126 | GC IgA              | 98   |     |
| TC126 | LZ                  | 283  |     |
| TC126 | ASC IgM             | 122  |     |
| TC126 | ASC IgG             | 207  |     |
| TC126 | B PLCG2             | 276  |     |
