# Supplementary material for: Distinct stage-specific transcriptional states of B cells derived from human tonsillar tissue
Source: PubMed Central journal article supplement (PMC10132144; doi:10.1172/jci.insight.155199), 2023-04-10
Supplement: jciinsight-8-155199-s228.pdf [file jciinsight-8-155199-s228.pdf]

| donor | grouping | count |
|-------|----------|-------|
| TC124 | ASC      | 652   |
| TC124 | GC       | 3050  |
| TC124 | non-GC   | 24355 |
| TC125 | ASC      | 619   |
| TC125 | GC       | 2034  |
| TC125 | non-GC   | 5838  |
| TC126 | ASC      | 329   |
| TC126 | GC       | 2707  |
| TC126 | non-GC   | 5792  |
