# Supplementary material for: Distinct stage-specific transcriptional states of B cells derived from human tonsillar tissue
Source: PubMed Central journal article supplement (PMC10132144; doi:10.1172/jci.insight.155199), 2023-04-10
Supplement: jciinsight-8-155199-s229.pdf [file jciinsight-8-155199-s229.pdf]

| p_val   | avg_log2FC        | pct.1 | pct.2 | p_val_adj | cluster |
|---------|-------------------|-------|-------|-----------|---------|
| gene    | cluster_names     |       |       |           |         |
| 0       | 0.678390738596959 |       | 0.749 | 0.589     | 0       |
| MEF2C   | Naive 2           |       |       |           |         |
| 0       | 0.530388809598243 |       | 0.98  | 0.926     | 0       |
| BTG1    | Naive 2           |       |       |           |         |
| 0       | 0.512668912712584 |       | 0.998 | 0.983     | 0       |
| TMSB10  | Naive 2           |       |       |           |         |
| 0       | 0.463631133151577 |       | 0.793 | 0.568     | 0       |
| IGHD    | Naive 2           |       |       |           |         |
| 0       | 0.457319967123718 |       | 0.966 | 0.848     | 0       |
| CD52    | Naive 2           |       |       |           |         |
| 0       | 0.456441976276855 |       | 1     | 0.996     | 0       |
| RPS12   | Naive 2           |       |       |           |         |
| 0       | 0.38643701689355  | 1     | 0.995 | 0         | RPL12   |
| Naive 2 |                   |       |       |           |         |
| 0       | 0.358927633561675 |       | 0.997 | 0.978     | 0       |
| RPSA    | Naive 2           |       |       |           |         |
| 0       | 0.350786678171197 |       | 1     | 0.999     | 0       |
| RPL13A  | Naive 2           |       |       |           |         |
| 0       | 0.348634828999385 |       | 1     | 0.999     | 0       |
| RPL13   | Naive 2           |       |       |           |         |
| 0       | 0.348292274506282 |       | 1     | 0.999     | 0       |
| RPL34   | Naive 2           |       |       |           |         |
| 0       | 0.345244639173151 |       | 1     | 0.999     | 0       |
| RPS19   | Naive 2           |       |       |           |         |
| 0       | 0.34128560603671  | 1     | 0.998 | 0         | RPL18A  |
| Naive 2 |                   |       |       |           |         |
| 0       | 0.336591582070157 |       | 0.991 | 0.964     | 0       |
| ND3     | Naive 2           |       |       |           | MT-     |
| 0       | 0.334537702040415 |       | 1     | 0.999     | 0       |
| EEF1A1  | Naive 2           |       |       |           |         |
| 0       | 0.323497476443285 |       | 0.999 | 0.995     | 0       |
| RPL31   | Naive 2           |       |       |           |         |
| 0       | 0.322687618811019 |       | 0.999 | 0.992     | 0       |
| RPS5    | Naive 2           |       |       |           |         |
| 0       | 0.318340795978724 |       | 1     | 0.997     | 0       |
| RPL3    | Naive 2           |       |       |           |         |
| 0       | 0.317095820018712 |       | 1     | 0.998     | 0       |
| RPL39   | Naive 2           |       |       |           |         |
| 0       | 0.316438328131834 |       | 1     | 0.999     | 0       |
| RPLP1   | Naive 2           |       |       |           |         |
| 0       | 0.314628817101718 |       | 1     | 0.997     | 0       |
| RPS3A   | Naive 2           |       |       |           |         |
| 0       | 0.313827803406306 |       | 1     | 0.998     | 0       |
| RPL32   | Naive 2           |       |       |           |         |
| 0       | 0.306401766555309 |       | 1     | 0.997     | 0       |
| RPL11   | Naive 2           |       |       |           |         |
| 0       | 0.304122219997052 |       | 1     | 0.998     | 0       |
| RPS29   | Naive 2           |       |       |           |         |

|                       |                    |          |         |       |       |     |
|-----------------------|--------------------|----------|---------|-------|-------|-----|
| 0                     | -0.702271708611225 | 0.2      | 0.433   | 0     | 0     |     |
| YWHAE                 | Naive 2            |          |         |       |       |     |
| 0                     | -0.77166769747628  | 0.019    | 0.175   | 0     | 0     | BIK |
|                       | Naive 2            |          |         |       |       |     |
| 0                     | -0.878454810393786 | 0.234    | 0.444   | 0     | 0     | TXN |
|                       | Naive 2            |          |         |       |       |     |
| 0                     | -0.920744890330294 | 0.12     | 0.341   | 0     | 0     |     |
| CD27                  | Naive 2            |          |         |       |       |     |
| 0                     | -0.924659823757891 | 0.11     | 0.338   | 0     | 0     |     |
| NME1                  | Naive 2            |          |         |       |       |     |
| 0                     | -1.06626849671682  | 0.401    | 0.64    | 0     | 0     |     |
| PRDX1                 | Naive 2            |          |         |       |       |     |
| 0                     | -1.46019588978664  | 0.031    | 0.242   | 0     | 0     |     |
| RGS13                 | Naive 2            |          |         |       |       |     |
| 3.93351528004083e-312 | -0.793232556682932 |          |         | 0.079 | 0.266 |     |
| 7.01306439278479e-308 | 0                  | UBE2J1   | Naive 2 |       |       |     |
| 1.09912637786038e-304 | -1.32749146340088  |          |         | 0.15  | 0.315 |     |
| 1.95963241908728e-300 | 0                  | MIR155HG | Naive 2 |       |       |     |
| 4.04408723782934e-298 | -0.646361748595568 |          |         | 0.017 | 0.158 |     |
| 7.21020313632592e-294 | 0                  | NEIL1    | Naive 2 |       |       |     |
| 4.97069832583844e-298 | -0.679626354135813 |          |         | 0.111 | 0.32  |     |
| 8.86225804513735e-294 | 0                  | CD82     | Naive 2 |       |       |     |
| 4.05652560706256e-294 | -0.552807411845522 |          |         | 0.012 | 0.14  |     |
| 7.23237950483185e-290 | 0                  | CD38     | Naive 2 |       |       |     |
| 2.26012629285412e-281 | -0.879478039486636 |          |         | 0.61  | 0.737 |     |
| 4.02957916752961e-277 | 0                  | EN01     | Naive 2 |       |       |     |
| 5.67387474236778e-279 | -0.763373990501685 |          |         | 0.645 | 0.769 |     |
| 1.01159512781675e-274 | 0                  | RAN      | Naive 2 |       |       |     |
| 5.3321705139146e-277  | -0.853925099305617 |          |         | 0.217 | 0.427 |     |
| 9.50672680925833e-273 | 0                  | EIF5A    | Naive 2 |       |       |     |
| 1.60523178799568e-269 | -0.522096656346134 |          |         | 0.026 | 0.164 |     |
| 2.8619677548175e-265  | 0                  | AIM2     | Naive 2 |       |       |     |
| 9.49465344010225e-266 | -0.9117474571946   | 0.059    |         | 0.217 |       |     |
| 1.69280176183583e-261 | 0                  | PTTG1    | Naive 2 |       |       |     |
| 3.6677740137285e-258  | -0.679375322244635 |          |         | 0.389 | 0.586 |     |
| 6.53927428907655e-254 | 0                  | TCEA1    | Naive 2 |       |       |     |
| 2.939813159295e-257   | -1.05145458884914  |          |         | 0.059 | 0.207 |     |
| 5.24139288170705e-253 | 0                  | XBP1     | Naive 2 |       |       |     |
| 3.20380674104574e-254 | -0.46665246703159  |          |         | 0.011 | 0.126 |     |
| 5.71206703861045e-250 | 0                  | HRK      | Naive 2 |       |       |     |
| 6.16325685357657e-247 | -0.656295115545579 |          |         | 0.131 | 0.31  |     |
| 1.09884706442417e-242 | 0                  | SRM      | Naive 2 |       |       |     |
| 1.65515805988057e-243 | -0.419476666645065 |          |         | 0.009 | 0.12  |     |
| 2.95098130496106e-239 | 0                  | MYBL2    | Naive 2 |       |       |     |
| 2.76204064140238e-243 | -0.682563577073565 |          |         | 0.455 | 0.626 |     |
| 4.92444225955631e-239 | 0                  | LDHA     | Naive 2 |       |       |     |
| 1.80569044480991e-242 | -0.684359620938062 |          |         | 0.063 | 0.217 |     |
| 3.21936549405159e-238 | 0                  | DAAM1    | Naive 2 |       |       |     |
| 3.66763091927274e-239 | -0.602747656000651 |          |         | 0.3   | 0.503 |     |
| 6.53901916597138e-235 | 0                  | CYCS     | Naive 2 |       |       |     |

|                       |                       |       |       |
|-----------------------|-----------------------|-------|-------|
| 4.67325918985822e-239 | -0.931449232971528    | 0.256 | 0.434 |
| 8.33195380959823e-235 | 0 FABP5 Naive 2       |       |       |
| 2.35810443200139e-238 | -0.54268675761147     | 0.451 | 0.64  |
| 4.20426439181527e-234 | 0 POLR2L Naive 2      |       |       |
| 2.116506565979e-236   | -0.495448543939493    | 0.029 | 0.153 |
| 3.77351955648396e-232 | 0 CYTOR Naive 2       |       |       |
| 2.34251553352791e-236 | -0.584508774087843    | 0.117 | 0.306 |
| 4.1764709447269e-232  | 0 POU2AF1 Naive 2     |       |       |
| 5.86349208225612e-235 | -0.561613087852725    | 0.094 | 0.262 |
| 1.04540200334544e-230 | 0 MTHFD2 Naive 2      |       |       |
| 2.70759452272396e-233 | -0.567385924815124    | 0.078 | 0.247 |
| 4.82737027456454e-229 | 0 NANS Naive 2        |       |       |
| 1.22024983157875e-230 | -0.678557512344495    | 0.408 | 0.59  |
| 2.17558342472176e-226 | 0 NCL Naive 2         |       |       |
| 3.4770020894129e-230  | -0.846889868299928    | 0.58  | 0.72  |
| 6.19914702521426e-226 | 0 H2AFZ Naive 2       |       |       |
| 2.3151416709366e-229  | -1.11872530010183     | 0.089 | 0.23  |
| 4.12766608511286e-225 | 0 LGALS1 Naive 2      |       |       |
| 1.1693114834579e-225  | 0.362808000492376     | 0.954 | 0.908 |
| 2.0847654438571e-221  | 0 EEF1B2 Naive 2      |       |       |
| 1.76166170976002e-223 | -0.634091158196456    | 0.06  | 0.201 |
| 3.14086666233114e-219 | 0 BCL2A1 Naive 2      |       |       |
| 2.21559736377127e-223 | -0.572100237305106    | 0.45  | 0.628 |
| 3.95018853986779e-219 | 0 SEC61B Naive 2      |       |       |
| 1.3231945954618e-222  | -1.4562583414322 0.06 | 0.199 |       |
| 2.35912364424884e-218 | 0 MZB1 Naive 2        |       |       |
| 1.39820524390124e-221 | -0.659063337860054    | 0.169 | 0.348 |
| 2.49286012935153e-217 | 0 DDX21 Naive 2       |       |       |
| 1.97388203804017e-221 | -0.588165200412115    | 0.154 | 0.333 |
| 3.51923428562182e-217 | 0 ODC1 Naive 2        |       |       |
| 4.28122905075246e-220 | -0.587658862894689    | 0.863 | 0.907 |
| 7.63300327458656e-216 | 0 PFN1 Naive 2        |       |       |
| 4.7714421634011e-215  | -0.393359870368968    | 0.027 | 0.146 |
| 8.50700423312782e-211 | 0 SLC1A5 Naive 2      |       |       |
| 1.08257390292862e-214 | -0.663948799283596    | 0.169 | 0.35  |
| 1.93012101153144e-210 | 0 SEC11C Naive 2      |       |       |
| 1.16043284096804e-214 | -0.586947238918603    | 0.317 | 0.506 |
| 2.06893571216192e-210 | 0 SNRPD1 Naive 2      |       |       |
| 1.56349881390555e-213 | -1.68616918908409     | 0.181 | 0.327 |
| 2.78756203531221e-209 | 0 HMGB2 Naive 2       |       |       |
| 8.61281257924391e-212 | -0.425547424356215    | 0.007 | 0.1   |
| 1.5355783547534e-207  | 0 AICDA Naive 2       |       |       |
| 2.11190557279149e-211 | -0.648758575355528    | 0.013 | 0.111 |
| 3.76531644572995e-207 | 0 PCLAF Naive 2       |       |       |
| 5.5024743115616e-209  | -0.598784432983381    | 0.501 | 0.665 |
| 9.81036145008318e-205 | 0 SET Naive 2         |       |       |
| 4.20210588221509e-205 | -0.685493956194869    | 0.045 | 0.173 |
| 7.49193457740128e-201 | 0 DUSP2 Naive 2       |       |       |
| 4.65437887103251e-205 | -0.465073246561079    | 0.031 | 0.152 |
| 8.29829208916386e-201 | 0 PHGDH Naive 2       |       |       |

|                       |                      |       |       |
|-----------------------|----------------------|-------|-------|
| 7.40742099852209e-204 | -0.503087348720931   | 0.166 | 0.356 |
| 1.3206690898265e-199  | 0 IMP4 Naive 2       |       |       |
| 6.48132664782935e-203 | -0.519391680387714   | 0.267 | 0.464 |
| 1.15555572804149e-198 | 0 SLIRP Naive 2      |       |       |
| 2.9483540685463e-202  | -0.52157349719306    | 0.51  | 0.673 |
| 5.2566204688112e-198  | 0 SNRPG Naive 2      |       |       |
| 4.71552071442391e-198 | -0.401094235551833   | 0.019 | 0.131 |
| 8.40730188174639e-194 | 0 CPNE5 Naive 2      |       |       |
| 4.64030565866213e-197 | -0.608260253880144   | 0.575 | 0.718 |
| 8.27320095882871e-193 | 0 EZR Naive 2        |       |       |
| 1.40373068372039e-196 | -0.587989453751977   | 0.099 | 0.257 |
| 2.50271143600509e-192 | 0 CKS2 Naive 2       |       |       |
| 8.8819942463181e-192  | -1.30346989800321    | 0.057 | 0.166 |
| 1.58357075417605e-187 | 0 IGHA1 Naive 2      |       |       |
| 1.48991265435158e-191 | -0.612796856498941   | 0.063 | 0.178 |
| 2.65636527144343e-187 | 0 LMNA Naive 2       |       |       |
| 1.71965395793544e-190 | -0.521397769091099   | 0.049 | 0.184 |
| 3.06597104160309e-186 | 0 SUSD3 Naive 2      |       |       |
| 2.72613320726792e-190 | -0.499616838810366   | 0.235 | 0.421 |
| 4.86042289523797e-186 | 0 CCT5 Naive 2       |       |       |
| 7.20792580497445e-190 | -0.459982955112255   | 0.057 | 0.184 |
| 1.28510109176889e-185 | 0 CD58 Naive 2       |       |       |
| 3.05710004666044e-189 | -0.522441839830012   | 0.474 | 0.635 |
| 5.45050367319089e-185 | 0 POMP Naive 2       |       |       |
| 4.95434661924525e-188 | -0.524764731871451   | 0.388 | 0.565 |
| 8.83310458745235e-184 | 0 SRSF9 Naive 2      |       |       |
| 2.35674612975937e-187 | -0.40828375647492    | 0.022 | 0.13  |
| 4.20184267474799e-183 | 0 AC023590.1 Naive 2 |       |       |
| 1.22597073201979e-184 | 0.525485639251723    | 0.399 | 0.253 |
| 2.18578321811808e-180 | 0 ADAM28 Naive 2     |       |       |
| 2.81812544058627e-184 | -0.475540223258994   | 0.32  | 0.507 |
| 5.02443584802125e-180 | 0 PRELID1 Naive 2    |       |       |
| 3.46972887508507e-182 | -0.629000440867381   | 0.07  | 0.21  |
| 6.18617961138917e-178 | 0 RGS2 Naive 2       |       |       |
| 3.55902197357262e-181 | -0.598808004949098   | 0.36  | 0.526 |
| 6.34538027668263e-177 | 0 HSPE1 Naive 2      |       |       |
| 3.53927534380741e-180 | -0.386279903932012   | 0.03  | 0.132 |
| 6.31017401047424e-176 | 0 PYCR1 Naive 2      |       |       |
| 5.85333613775258e-180 | -0.324687291127661   | 0.017 | 0.116 |
| 1.04359129999991e-175 | 0 FAM241A Naive 2    |       |       |
| 1.88948702876126e-178 | -0.41378610835748    | 0.718 | 0.821 |
| 3.36876642357845e-174 | 0 RPS26 Naive 2      |       |       |
| 2.7284253549078e-178  | -0.493304360548897   | 0.135 | 0.299 |
| 4.86450956526512e-174 | 0 SMS Naive 2        |       |       |
| 7.21605739855868e-176 | -0.380724175380114   | 0.058 | 0.183 |
| 1.28655087358903e-171 | 0 PPP1R14B Naive 2   |       |       |
| 1.22289301946977e-175 | 0.462765779868323    | 0.378 | 0.226 |
| 2.18029596441265e-171 | 0 FCMR Naive 2       |       |       |
| 1.15201859612965e-174 | -0.545166549886194   | 0.025 | 0.126 |
| 2.05393395503955e-170 | 0 VPREB3 Naive 2     |       |       |

|                       |                        |       |       |
|-----------------------|------------------------|-------|-------|
| 1.0486482030778e-173  | -0.476380777005271     | 0.049 | 0.175 |
| 1.86963488126741e-169 | 0 CD81 Naive 2         |       |       |
| 1.51886852728129e-171 | -0.592467929595527     | 0.514 | 0.66  |
| 2.70799069728982e-167 | 0 HERPUD1 Naive 2      |       |       |
| 8.60902876192954e-171 | -0.671549366820418     | 0.151 | 0.303 |
| 1.53490373796442e-166 | 0 HSPA5 Naive 2        |       |       |
| 3.7540747348648e-170  | -0.439029306543821     | 0.11  | 0.264 |
| 6.69313984479045e-166 | 0 HNRNPAB Naive 2      |       |       |
| 1.43901366283247e-169 | -0.48193944784361      | 0.673 | 0.777 |
| 2.56561745946401e-165 | 0 PSMA7 Naive 2        |       |       |
| 2.92596174282589e-169 | -0.562571666083926     | 0.303 | 0.473 |
| 5.21669719128427e-165 | 0 ANXA2 Naive 2        |       |       |
| 4.03086312638055e-169 | -0.329125210352789     | 0.019 | 0.12  |
| 7.18662586802389e-165 | 0 SEMA4A Naive 2       |       |       |
| 1.17739747317129e-167 | -0.595464402897456     | 0.22  | 0.38  |
| 2.0991819549171e-163  | 0 TUBB4B Naive 2       |       |       |
| 2.91886325891583e-167 | -0.39850903739057      | 0.048 | 0.166 |
| 5.20404130432104e-163 | 0 PRDX4 Naive 2        |       |       |
| 4.1005306886476e-167  | -0.766127345001153     | 0.472 | 0.598 |
| 7.31083616478981e-163 | 0 TUBB Naive 2         |       |       |
| 1.54591053352095e-165 | -0.479001953805833     | 0.522 | 0.664 |
| 2.75620389021451e-161 | 0 ERH Naive 2          |       |       |
| 1.29569277890801e-164 | -0.564570212197987     | 0.357 | 0.511 |
| 2.3100906555151e-160  | 0 RANBP1 Naive 2       |       |       |
| 2.90129858579178e-164 | -1.11819292671419      | 0.392 | 0.509 |
| 5.17272524860817e-160 | 0 LTB Naive 2          |       |       |
| 1.55053953534428e-162 | 0.39790350886969 0.633 | 0.487 |       |
| 2.76445693756532e-158 | 0 BANK1 Naive 2        |       |       |
| 2.63038286676082e-162 | 0.45251458540115 0.463 | 0.324 |       |
| 4.68970961314787e-158 | 0 TRAF3IP3 Naive 2     |       |       |
| 1.00325250509794e-161 | -0.44825748407256      | 0.504 | 0.653 |
| 1.78869889133911e-157 | 0 ATP5F1B Naive 2      |       |       |
| 2.55039577713873e-161 | -0.474012025442794     | 0.306 | 0.487 |
| 4.54710063106065e-157 | 0 COX17 Naive 2        |       |       |
| 2.65312040492307e-160 | -0.476850049777428     | 0.422 | 0.581 |
| 4.73024836993735e-156 | 0 SEC61G Naive 2       |       |       |
| 3.26746285389893e-160 | -0.409438569300533     | 0.124 | 0.285 |
| 5.82555952221641e-156 | 0 CDV3 Naive 2         |       |       |
| 5.67266460007175e-160 | -0.497245524055165     | 0.251 | 0.421 |
| 1.01137937154679e-155 | 0 FNBP1 Naive 2        |       |       |
| 5.79559564193242e-160 | -0.475655526246549     | 0.184 | 0.359 |
| 1.03329674700013e-155 | 0 RFTN1 Naive 2        |       |       |
| 2.4058485760089e-159  | 0.510811908237922      | 0.276 | 0.164 |
| 4.28938742616627e-155 | 0 PLPP5 Naive 2        |       |       |
| 2.63601603742897e-159 | -0.496669839153754     | 0.12  | 0.268 |
| 4.69975299313211e-155 | 0 SLBP Naive 2         |       |       |
| 2.70174461542167e-159 | -0.524372486002343     | 0.117 | 0.269 |
| 4.8169404748353e-155  | 0 KPNA2 Naive 2        |       |       |
| 2.49848443025557e-158 | -0.396094637687183     | 0.075 | 0.205 |
| 4.45454789070266e-154 | 0 TUBA1C Naive 2       |       |       |

|                       |                    |       |       |
|-----------------------|--------------------|-------|-------|
| 5.41798301953358e-158 | -0.424040441727871 | 0.19  | 0.362 |
| 9.65972192552642e-154 | 0 EIF3A Naive 2    |       |       |
| 1.11703858053107e-157 | -0.462347666639165 | 0.187 | 0.35  |
| 1.99156808522885e-153 | 0 NOP56 Naive 2    |       |       |
| 5.26583134479157e-157 | -0.429894453008766 | 0.098 | 0.25  |
| 9.3884507046289e-153  | 0 SIAH2 Naive 2    |       |       |
| 6.54392777316069e-157 | -0.481890901739424 | 0.39  | 0.558 |
| 1.16671688267682e-152 | 0 SRSF7 Naive 2    |       |       |
| 3.53280066355835e-156 | -0.637962574397977 | 0.129 | 0.264 |
| 6.29863030305818e-152 | 0 RGS1 Naive 2     |       |       |
| 6.59909689547775e-156 | -0.590848191310736 | 0.489 | 0.628 |
| 1.17655298549473e-151 | 0 DYNLL1 Naive 2   |       |       |
| 1.96157179561073e-154 | -1.48129550698844  | 0.115 | 0.237 |
| 3.49728635439437e-150 | 0 IGHG1 Naive 2    |       |       |
| 3.06634982354212e-154 | 0.445839672235066  | 0.454 | 0.314 |
| 5.46699510039325e-150 | 0 HVCN1 Naive 2    |       |       |
| 7.466628887909e-154   | -0.38668300477234  | 0.07  | 0.206 |
| 1.3312252644253e-149  | 0 TRABD Naive 2    |       |       |
| 8.65025061352107e-153 | -0.452854600862763 | 0.228 | 0.405 |
| 1.54225318188467e-148 | 0 PTP4A2 Naive 2   |       |       |
| 1.17389421402182e-152 | -0.466038628490541 | 0.723 | 0.822 |
| 2.0929359941795e-148  | 0 CALM2 Naive 2    |       |       |
| 2.40104038572913e-152 | -0.385340934624689 | 0.019 | 0.111 |
| 4.28081490371646e-148 | 0 WDR66 Naive 2    |       |       |
| 2.62785743121245e-151 | -0.457496657275999 | 0.103 | 0.244 |
| 4.68520701410868e-147 | 0 TRAF4 Naive 2    |       |       |
| 1.85183139809327e-150 | -0.594996967172013 | 0.23  | 0.386 |
| 3.30163019966048e-146 | 0 H2AFV Naive 2    |       |       |
| 5.54068559712016e-150 | -0.432674565589953 | 0.034 | 0.136 |
| 9.87848835110554e-146 | 0 UBE2S Naive 2    |       |       |
| 2.10326275873063e-149 | -0.528520557700052 | 0.261 | 0.426 |
| 3.74990717254084e-145 | 0 BASP1 Naive 2    |       |       |
| 4.52876728886819e-149 | -0.48804797730888  | 0.308 | 0.467 |
| 8.07433919932309e-145 | 0 HMGA1 Naive 2    |       |       |
| 1.47097409114852e-148 | -0.432649973688061 | 0.29  | 0.464 |
| 2.6225997071087e-144  | 0 EIF5B Naive 2    |       |       |
| 2.53473747034839e-148 | -0.388490237040152 | 0.167 | 0.331 |
| 4.51918343588414e-144 | 0 GLRX3 Naive 2    |       |       |
| 4.05662677687499e-148 | -0.510524009591372 | 0.14  | 0.28  |
| 7.23255988049042e-144 | 0 SRGN Naive 2     |       |       |
| 1.16348509045678e-146 | -0.431017878394177 | 0.171 | 0.329 |
| 2.07437756777539e-142 | 0 ATP1B3 Naive 2   |       |       |
| 2.0945360421811e-146  | -0.433890201069759 | 0.197 | 0.363 |
| 3.73434830960469e-142 | 0 VOPP1 Naive 2    |       |       |
| 4.118078087686e-146   | -0.438349222799407 | 0.29  | 0.457 |
| 7.34212142253537e-142 | 0 CCT2 Naive 2     |       |       |
| 5.05698596245172e-146 | -0.467610438380094 | 0.154 | 0.307 |
| 9.01610027245518e-142 | 0 JPT1 Naive 2     |       |       |
| 1.88710030735271e-145 | -0.387941178871805 | 0.089 | 0.221 |
| 3.36451113797915e-141 | 0 EBNA1BP2 Naive 2 |       |       |

|                       |                    |       |       |
|-----------------------|--------------------|-------|-------|
| 1.74855220747684e-144 | -0.535586814567194 | 0.336 | 0.487 |
| 3.11749373071047e-140 | 0 HSPD1 Naive 2    |       |       |
| 4.90551377085045e-144 | -0.432573852157897 | 0.431 | 0.585 |
| 8.74604050204926e-140 | 0 ATP5PF Naive 2   |       |       |
| 2.75303171647322e-143 | -0.421671640221049 | 0.171 | 0.328 |
| 4.9083802473001e-139  | 0 NOP58 Naive 2    |       |       |
| 1.246449782839e-141   | -0.402033334750744 | 0.09  | 0.227 |
| 2.22229531782366e-137 | 0 UBALD2 Naive 2   |       |       |
| 3.51456888720045e-141 | -0.447025362345157 | 0.064 | 0.19  |
| 6.26612486898969e-137 | 0 CCDC88A Naive 2  |       |       |
| 4.2840640691205e-141  | -0.42600126953569  | 0.212 | 0.377 |
| 7.63805782883494e-137 | 0 TIMM13 Naive 2   |       |       |
| 8.57003938196342e-141 | 0.321480323020306  | 0.708 | 0.609 |
| 1.52795232141026e-136 | 0 HLA-DMB Naive 2  |       |       |
| 8.8639957267873e-141  | -0.457718948531694 | 0.255 | 0.412 |
| 1.58036179812891e-136 | 0 NHP2 Naive 2     |       |       |
| 2.23009799492638e-140 | -0.394241000634178 | 0.245 | 0.417 |
| 3.97604171515424e-136 | 0 NDUFS6 Naive 2   |       |       |
| 2.25871440104741e-140 | -0.394523906171784 | 0.131 | 0.282 |
| 4.02706190562742e-136 | 0 GSPT1 Naive 2    |       |       |
| 9.07012599174177e-140 | -0.413648686989372 | 0.098 | 0.232 |
| 1.61711276306764e-135 | 0 CFLAR Naive 2    |       |       |
| 9.76725228287817e-140 | -1.70775821075511  | 0.313 | 0.422 |
| 1.74140340951435e-135 | 0 JCHAIN Naive 2   |       |       |
| 1.04077824465086e-139 | -0.424939700627126 | 0.664 | 0.76  |
| 1.85560353238803e-135 | 0 CHCHD2 Naive 2   |       |       |
| 1.51022759103946e-139 | -0.398877598097664 | 0.17  | 0.334 |
| 2.69258477206425e-135 | 0 TIMM8B Naive 2   |       |       |
| 1.57351417565327e-139 | -0.416403221035721 | 0.28  | 0.445 |
| 2.80541842377222e-135 | 0 DDX39A Naive 2   |       |       |
| 1.8375744876449e-138  | -0.661017009851247 | 0.054 | 0.146 |
| 3.2762115540221e-134  | 0 MYC Naive 2      |       |       |
| 1.20325344463389e-137 | -0.454999945631402 | 0.103 | 0.23  |
| 2.14528056643776e-133 | 0 PIM3 Naive 2     |       |       |
| 1.67230282842517e-137 | 0.36663828435372   | 0.665 | 0.558 |
| 2.98154871279923e-133 | 0 SARAF Naive 2    |       |       |
| 7.45202400216458e-136 | -0.41694841114345  | 0.211 | 0.374 |
| 1.32862135934592e-131 | 0 H2AFY Naive 2    |       |       |
| 1.88997437186607e-135 | -0.327324520907134 | 0.059 | 0.174 |
| 3.36963530760002e-131 | 0 PAICS Naive 2    |       |       |
| 3.61453014352998e-135 | -0.401024997402051 | 0.135 | 0.274 |
| 6.44434579289961e-131 | 0 GARS Naive 2     |       |       |
| 6.3882597912016e-135  | -0.485802109787311 | 0.39  | 0.537 |
| 1.13896283817333e-130 | 0 PA2G4 Naive 2    |       |       |
| 1.79102004886048e-134 | -0.312617138819406 | 0.074 | 0.206 |
| 3.19320964511334e-130 | 0 LRRC59 Naive 2   |       |       |
| 4.99717485662905e-134 | -0.334870903572615 | 0.064 | 0.189 |
| 8.90946305188393e-130 | 0 CCDC167 Naive 2  |       |       |
| 7.04057381597536e-134 | -0.366909307207319 | 0.063 | 0.176 |
| 1.25526390565025e-129 | 0 NOLC1 Naive 2    |       |       |

|                       |                    |       |       |
|-----------------------|--------------------|-------|-------|
| 7.49367911357416e-134 | -0.42257433153722  | 0.312 | 0.476 |
| 1.33604804915914e-129 | 0 SEM1 Naive 2     |       |       |
| 1.59542654315807e-133 | -0.485677390606171 | 0.144 | 0.295 |
| 2.84448598379653e-129 | 0 PIM1 Naive 2     |       |       |
| 4.59268799992135e-133 | -0.37542911858552  | 0.837 | 0.892 |
| 8.18830343505978e-129 | 0 H3F3B Naive 2    |       |       |
| 5.10794833568991e-133 | -0.421426679642668 | 0.332 | 0.49  |
| 9.10696108770153e-129 | 0 PRMT1 Naive 2    |       |       |
| 9.55111559030671e-133 | -0.386003759932179 | 0.156 | 0.31  |
| 1.70286839859578e-128 | 0 PRDX3 Naive 2    |       |       |
| 7.96935967215129e-132 | -0.421020706599444 | 0.522 | 0.657 |
| 1.42085713594785e-127 | 0 PSMA4 Naive 2    |       |       |
| 8.28548524654628e-132 | -0.361148256822458 | 0.106 | 0.241 |
| 1.47721916460674e-127 | 0 MRPL12 Naive 2   |       |       |
| 3.48219906211405e-131 | -0.458806541931283 | 0.466 | 0.603 |
| 6.20841270784314e-127 | 0 LDHB Naive 2     |       |       |
| 7.60103234585551e-131 | -0.408184285998127 | 0.476 | 0.619 |
| 1.35518805694258e-126 | 0 SRSF2 Naive 2    |       |       |
| 5.51766664117847e-130 | -0.355262480635228 | 0.056 | 0.16  |
| 9.83744785455709e-126 | 0 NOP16 Naive 2    |       |       |
| 7.24902582517408e-130 | -0.349254210630712 | 0.051 | 0.166 |
| 1.29242881437029e-125 | 0 SEC14L1 Naive 2  |       |       |
| 5.33077332068557e-129 | -0.380534522416138 | 0.364 | 0.525 |
| 9.50423575345031e-125 | 0 COX5A Naive 2    |       |       |
| 4.49780161096324e-128 | -0.38212550781982  | 0.344 | 0.513 |
| 8.01913049218637e-124 | 0 GTF3A Naive 2    |       |       |
| 5.53623686919305e-128 | -0.446762114755541 | 0.409 | 0.554 |
| 9.87055671408429e-124 | 0 PSME2 Naive 2    |       |       |
| 2.29132037044301e-127 | -0.359082076428611 | 0.096 | 0.223 |
| 4.08519508846285e-123 | 0 TOMM40 Naive 2   |       |       |
| 4.2325557792075e-127  | -0.480154851783219 | 0.212 | 0.35  |
| 7.54622369874905e-123 | 0 SLC3A2 Naive 2   |       |       |
| 2.36517192587652e-126 | 0.330135057403763  | 0.854 | 0.808 |
| 4.21686502664525e-122 | 0 NOP53 Naive 2    |       |       |
| 4.08858261668092e-125 | -0.359142932456588 | 0.089 | 0.208 |
| 7.28953394728042e-121 | 0 GPATCH4 Naive 2  |       |       |
| 7.72232155283055e-125 | -0.452946441285371 | 0.421 | 0.565 |
| 1.37681270965416e-120 | 0 PARP1 Naive 2    |       |       |
| 3.52279968610287e-123 | -0.38821414558485  | 0.313 | 0.469 |
| 6.28079956035281e-119 | 0 CCT6A Naive 2    |       |       |
| 5.2731101518837e-123  | -0.391831526406361 | 0.335 | 0.497 |
| 9.40142808979346e-119 | 0 MTDH Naive 2     |       |       |
| 1.1548449908e-122     | -0.382307695900252 | 0.53  | 0.662 |
| 2.05897313409732e-118 | 0 ATP5MD Naive 2   |       |       |
| 2.79564637961009e-122 | -0.390904647228734 | 0.325 | 0.486 |
| 4.98435793020682e-118 | 0 RAP1B Naive 2    |       |       |
| 4.34374022677178e-122 | -0.424499180059735 | 0.458 | 0.595 |
| 7.74445445031141e-118 | 0 SNRPE Naive 2    |       |       |
| 5.45548820811468e-122 | 0.406689796082829  | 0.144 | 0.061 |
| 9.72658992624766e-118 | 0 KCNG1 Naive 2    |       |       |



|                       |                        |       |       |
|-----------------------|------------------------|-------|-------|
| 2.03374925914916e-121 | -0.452353466166912     | 0.475 | 0.606 |
| 3.62597155413703e-117 | 0 ANP32B Naive 2       |       |       |
| 4.91823634950487e-121 | -0.380927987097052     | 0.069 | 0.189 |
| 8.76872358753224e-117 | 0 SEL1L3 Naive 2       |       |       |
| 5.50738369194845e-121 | -0.415043372007947     | 0.471 | 0.608 |
| 9.81911438437489e-117 | 0 ATP5MC3 Naive 2      |       |       |
| 1.11485236529612e-120 | -0.551926844703396     | 0.235 | 0.372 |
| 1.98767028208644e-116 | 0 S100A10 Naive 2      |       |       |
| 1.42542215201869e-120 | -0.435160374683046     | 0.095 | 0.213 |
| 2.54138515483412e-116 | 0 DNMT1 Naive 2        |       |       |
| 2.16277318645165e-120 | -0.344302008864408     | 0.232 | 0.394 |
| 3.85600831412465e-116 | 0 PSMA5 Naive 2        |       |       |
| 2.56096824560375e-120 | -0.352451941975408     | 0.252 | 0.417 |
| 4.56595028508693e-116 | 0 NOL7 Naive 2         |       |       |
| 3.21794441091531e-120 | -3.1837812204481 0.361 | 0.469 |       |
| 5.73727309022091e-116 | 0 IGHG3 Naive 2        |       |       |
| 3.56721537579464e-119 | -0.443401760454591     | 0.081 | 0.195 |
| 6.35998829350426e-115 | 0 PDIA4 Naive 2        |       |       |
| 3.94761050211796e-119 | -0.341193474364253     | 0.268 | 0.432 |
| 7.03819476422612e-115 | 0 PSMB2 Naive 2        |       |       |
| 6.36438410084054e-119 | -0.32393525405862      | 0.061 | 0.168 |
| 1.13470604133886e-114 | 0 RPF2 Naive 2         |       |       |
| 7.92752982340643e-119 | -0.502400767058873     | 0.679 | 0.762 |
| 1.41339929221513e-114 | 0 HSP90AA1 Naive 2     |       |       |
| 1.68739058452707e-118 | -0.324236106214387     | 0.124 | 0.263 |
| 3.00844867315331e-114 | 0 MRPL15 Naive 2       |       |       |
| 1.84694406711785e-118 | -0.376714827788683     | 0.135 | 0.269 |
| 3.29291657726442e-114 | 0 DKC1 Naive 2         |       |       |
| 2.53836691032141e-118 | -0.389070466649756     | 0.252 | 0.411 |
| 4.52565436441205e-114 | 0 SMARCB1 Naive 2      |       |       |
| 2.745894452673e-118   | -0.362203961200564     | 0.237 | 0.395 |
| 4.89565521967069e-114 | 0 PFDN2 Naive 2        |       |       |
| 3.04737213340424e-118 | -0.345917812282622     | 0.144 | 0.289 |
| 5.43315977664642e-114 | 0 SYNCRIP Naive 2      |       |       |
| 4.86841367377268e-118 | -0.353200666026838     | 0.101 | 0.23  |
| 8.67989473896932e-114 | 0 GNL3 Naive 2         |       |       |
| 6.13293937742433e-118 | -0.328622693875256     | 0.115 | 0.248 |
| 1.09344176160098e-113 | 0 DCAF13 Naive 2       |       |       |
| 4.75412519450087e-117 | -0.477524077693555     | 0.094 | 0.188 |
| 8.47612980927561e-113 | 0 TNFRSF18 Naive 2     |       |       |
| 6.55278686195541e-117 | -0.404335574075498     | 0.252 | 0.4   |
| 1.16829636961803e-112 | 0 LCP1 Naive 2         |       |       |
| 6.36207341994328e-116 | -0.33936099823529      | 0.211 | 0.366 |
| 1.13429407004169e-111 | 0 STRAP Naive 2        |       |       |
| 1.4127650495364e-115  | -0.494482827928184     | 0.103 | 0.222 |
| 2.51881880681844e-111 | 0 HMCES Naive 2        |       |       |
| 1.68396211481206e-115 | -0.463912175763532     | 0.209 | 0.356 |
| 3.00233605449842e-111 | 0 GRHPR Naive 2        |       |       |
| 1.7798843255434e-115  | -0.432331831529519     | 0.594 | 0.697 |
| 3.17335576401133e-111 | 0 SRSF3 Naive 2        |       |       |

|                       |                        |       |       |
|-----------------------|------------------------|-------|-------|
| 4.12033303780114e-115 | -0.343446144202871     | 0.144 | 0.284 |
| 7.34614177309565e-111 | 0 AK6 Naive 2          |       |       |
| 6.30354565002308e-115 | -0.387211615314906     | 0.323 | 0.478 |
| 1.12385915394261e-110 | 0 MRPL51 Naive 2       |       |       |
| 8.13245609622676e-115 | -0.356013125545102     | 0.188 | 0.338 |
| 1.44993559739627e-110 | 0 LPXN Naive 2         |       |       |
| 2.39496470103368e-114 | -0.39874218556988      | 0.062 | 0.164 |
| 4.26998256547295e-110 | 0 SDF2L1 Naive 2       |       |       |
| 2.96576850478878e-114 | -0.82229146062589      | 0.602 | 0.679 |
| 5.28766866718792e-110 | 0 TUBA1B Naive 2       |       |       |
| 3.55540339689692e-114 | -0.569646736423823     | 0.382 | 0.521 |
| 6.33892871632751e-110 | 0 SAT1 Naive 2         |       |       |
| 9.93178425170065e-114 | -0.332657932407196     | 0.154 | 0.301 |
| 1.77073781423571e-109 | 0 ATOX1 Naive 2        |       |       |
| 1.69335520618887e-113 | -0.343759583768557     | 0.254 | 0.415 |
| 3.01908299711413e-109 | 0 MRPL20 Naive 2       |       |       |
| 3.32129551838509e-113 | -0.354497063723348     | 0.174 | 0.314 |
| 5.92153777972878e-109 | 0 DCTPP1 Naive 2       |       |       |
| 5.33407030616227e-113 | -0.349146158948758     | 0.246 | 0.401 |
| 9.51011394885671e-109 | 0 PSMC1 Naive 2        |       |       |
| 5.3504521207984e-113  | -0.396378407335051     | 0.063 | 0.151 |
| 9.53932108617147e-109 | 0 PSAT1 Naive 2        |       |       |
| 8.90005075547611e-113 | -0.358726610352072     | 0.266 | 0.419 |
| 1.58679004919384e-108 | 0 PHB Naive 2          |       |       |
| 2.81765172828822e-112 | -0.347265403385524     | 0.296 | 0.454 |
| 5.02359126636508e-108 | 0 MINOS1 Naive 2       |       |       |
| 2.85496009374824e-111 | -0.350716449827561     | 0.113 | 0.25  |
| 5.09010835114373e-107 | 0 UBE2G1 Naive 2       |       |       |
| 3.90826249896845e-111 | -0.654022087699391     | 0.212 | 0.333 |
| 6.96804120941084e-107 | 0 HSP90B1 Naive 2      |       |       |
| 1.57071760778966e-110 | 0.34160568461154 0.469 | 0.329 |       |
| 2.80043242292818e-106 | 0 TXNIP Naive 2        |       |       |
| 1.66252184436311e-110 | -0.316507840441275     | 0.096 | 0.217 |
| 2.96411019631499e-106 | 0 GTPBP4 Naive 2       |       |       |
| 3.3763920718602e-110  | 0.37633792088519 0.285 | 0.177 |       |
| 6.01976942491954e-106 | 0 CLEC2B Naive 2       |       |       |
| 7.52612566932572e-110 | -0.320132440962183     | 0.504 | 0.641 |
| 1.34183294558408e-105 | 0 NDUFA13 Naive 2      |       |       |
| 1.60748497643463e-109 | -0.335071789486501     | 0.263 | 0.422 |
| 2.86598496448531e-105 | 0 NDUFAB1 Naive 2      |       |       |
| 2.00489455497992e-109 | -0.335809883515672     | 0.039 | 0.132 |
| 3.5745265020737e-105  | 0 GMDS Naive 2         |       |       |
| 2.0424066913354e-109  | -0.349787790867952     | 0.18  | 0.32  |
| 3.64140688998189e-105 | 0 PDCD5 Naive 2        |       |       |
| 2.21958791207272e-109 | -0.388879280116845     | 0.23  | 0.374 |
| 3.95730328843444e-105 | 0 PDIA6 Naive 2        |       |       |
| 3.67959532141588e-109 | -0.339965045626646     | 0.499 | 0.634 |
| 6.56035049855238e-105 | 0 PTGES3 Naive 2       |       |       |
| 3.93266351409703e-109 | -0.342589178519347     | 0.093 | 0.205 |
| 7.01154577928359e-105 | 0 WDR43 Naive 2        |       |       |

|                       |                        |       |       |
|-----------------------|------------------------|-------|-------|
| 1.52976896614555e-108 | -0.366296589469993     | 0.472 | 0.609 |
| 2.72742508974091e-104 | 0 EIF2S2 Naive 2       |       |       |
| 2.33415483871917e-108 | -0.315344584734887     | 0.244 | 0.399 |
| 4.16156466195241e-104 | 0 ARHGDI1 Naive 2      |       |       |
| 4.52887365916405e-108 | -0.317098542930114     | 0.076 | 0.181 |
| 8.07452884692359e-104 | 0 MRT04 Naive 2        |       |       |
| 4.8831206145035e-108  | -0.333970301503022     | 0.432 | 0.581 |
| 8.70611574359829e-104 | 0 SNU13 Naive 2        |       |       |
| 7.04154906597501e-108 | -0.447952484119699     | 0.133 | 0.259 |
| 1.25543778297268e-103 | 0 GCHFR Naive 2        |       |       |
| 8.38064248241725e-108 | -0.328750110801724     | 0.159 | 0.298 |
| 1.49418474819017e-103 | 0 NDUFAF8 Naive 2      |       |       |
| 1.66237065124201e-107 | -0.321497872291878     | 0.245 | 0.401 |
| 2.96384063409938e-103 | 0 PSMC3 Naive 2        |       |       |
| 1.87939048233292e-107 | -0.357637216773126     | 0.412 | 0.559 |
| 3.35076529095135e-103 | 0 SOD1 Naive 2         |       |       |
| 2.1240663783288e-107  | -0.345870064760073     | 0.556 | 0.677 |
| 3.78699794592242e-103 | 0 PSMB1 Naive 2        |       |       |
| 2.94854411647134e-107 | -0.4531491358053 0.327 | 0.46  |       |
| 5.25695930525676e-103 | 0 COTL1 Naive 2        |       |       |
| 5.09100338959581e-107 | -0.363120379055392     | 0.327 | 0.474 |
| 9.07674994331036e-103 | 0 ILF2 Naive 2         |       |       |
| 8.82345122497584e-107 | -0.306425581652496     | 0.085 | 0.203 |
| 1.57313311890094e-102 | 0 ZNF593 Naive 2       |       |       |
| 7.56809123056518e-106 | -0.374885994735187     | 0.512 | 0.637 |
| 1.34931498549747e-101 | 0 SERBP1 Naive 2       |       |       |
| 1.23639722695683e-105 | -0.309353092148817     | 0.308 | 0.467 |
| 2.20437261594134e-101 | 0 AURKAIP1 Naive 2     |       |       |
| 1.51671708637235e-105 | -0.317877835209088     | 0.242 | 0.397 |
| 2.70415489329327e-101 | 0 PSMD7 Naive 2        |       |       |
| 2.83060036852681e-105 | -0.369424096337912     | 0.545 | 0.665 |
| 5.04667739704646e-101 | 0 HNRNPC Naive 2       |       |       |
| 2.40190337051928e-104 | -0.327905197058833     | 0.191 | 0.341 |
| 4.28235351929883e-100 | 0 NDUFAF3 Naive 2      |       |       |
| 3.15880586944307e-104 | -0.307434891837635     | 0.129 | 0.258 |
| 5.63183498463005e-100 | 0 EIF2S1 Naive 2       |       |       |
| 5.07021527914768e-104 | -0.341837702301474     | 0.547 | 0.674 |
| 9.0396868211924e-100  | 0 YWHAB Naive 2        |       |       |
| 1.01056825199941e-103 | -0.367973575919229     | 0.234 | 0.377 |
| 1.80174213648975e-99  | 0 ANXA5 Naive 2        |       |       |
| 1.07675297141881e-103 | -0.350016567678531     | 0.454 | 0.588 |
| 1.91974287274259e-99  | 0 SNRPB Naive 2        |       |       |
| 1.17150830160135e-103 | -0.335539551105933     | 0.44  | 0.58  |
| 2.08868215092505e-99  | 0 PGK1 Naive 2         |       |       |
| 1.29896422732615e-103 | -0.424734103319881     | 0.937 | 0.943 |
| 2.3159233208998e-99   | 0 YBX1 Naive 2         |       |       |
| 1.53996627125549e-103 | -0.324692511379353     | 0.38  | 0.529 |
| 2.74560586502142e-99  | 0 EIF3I Naive 2        |       |       |
| 1.71501052327532e-103 | -0.361990223338144     | 0.081 | 0.186 |
| 3.05769226194756e-99  | 0 SAMSN1 Naive 2       |       |       |

|                       |                    |       |       |
|-----------------------|--------------------|-------|-------|
| 1.88170179067159e-103 | -0.33492043939428  | 0.608 | 0.719 |
| 3.35488612258838e-99  | 0 EL0B Naive 2     |       |       |
| 2.71364271035449e-103 | -0.33745708068786  | 0.24  | 0.389 |
| 4.83815358829102e-99  | 0 EIF3J Naive 2    |       |       |
| 5.24523358335266e-103 | -0.770260833654761 | 0.405 | 0.477 |
| 9.35172695575946e-99  | 0 S100A6 Naive 2   |       |       |
| 2.08664424397875e-102 | -0.460271512512489 | 0.308 | 0.44  |
| 3.72027802258971e-98  | 0 METAP2 Naive 2   |       |       |
| 4.88402655301667e-102 | -0.332937594429934 | 0.498 | 0.627 |
| 8.70773094137342e-98  | 0 RBM3 Naive 2     |       |       |
| 5.69485280842455e-102 | -0.329234309721532 | 0.056 | 0.157 |
| 1.01533530721401e-97  | 0 SOCS1 Naive 2    |       |       |
| 7.03025120410244e-102 | -0.303156711800191 | 0.29  | 0.447 |
| 1.25342348717942e-97  | 0 ADRM1 Naive 2    |       |       |
| 9.36532631338819e-102 | -0.326224437807857 | 0.36  | 0.511 |
| 1.66974402841398e-97  | 0 UBE2L3 Naive 2   |       |       |
| 1.02898845404212e-101 | -0.318444294263863 | 0.213 | 0.365 |
| 1.8345835147117e-97   | 0 EIF1AX Naive 2   |       |       |
| 2.28306422614454e-101 | -0.344619437438365 | 0.456 | 0.59  |
| 4.07047520879311e-97  | 0 UQCRO Naive 2    |       |       |
| 3.7478499277912e-101  | 0.346252436858324  | 0.125 | 0.064 |
| 6.68204163625893e-97  | 0 CHI3L2 Naive 2   |       |       |
| 8.95985954458987e-101 | 0.350949475300749  | 0.604 | 0.506 |
| 1.59745335820493e-96  | 0 ID3 Naive 2      |       |       |
| 1.84020258558366e-100 | -0.313945011518514 | 0.4   | 0.548 |
| 3.28089718983711e-96  | 0 SELENOT Naive 2  |       |       |
| 2.05671225371131e-100 | -0.367527378776257 | 0.249 | 0.385 |
| 3.6669122771419e-96   | 0 HSPA9 Naive 2    |       |       |
| 3.39590158204233e-100 | -0.333229874475736 | 0.536 | 0.662 |
| 6.05455293062328e-96  | 0 ATP5MF Naive 2   |       |       |
| 4.86548779805881e-100 | -0.310891157297466 | 0.953 | 0.963 |
| 8.67467819515905e-96  | 0 OAZ1 Naive 2     |       |       |
| 5.41708075437589e-100 | -0.327859280109456 | 0.321 | 0.47  |
| 9.65811327697678e-96  | 0 CCT7 Naive 2     |       |       |
| 6.29446290732689e-100 | -0.332670067578315 | 0.458 | 0.596 |
| 1.12223979174731e-95  | 0 PARK7 Naive 2    |       |       |
| 6.71791129977669e-100 | -0.355212284604376 | 0.307 | 0.453 |
| 1.19773640563719e-95  | 0 PPP1R15A Naive 2 |       |       |
| 7.7912569730663e-100  | -0.383902992841292 | 0.196 | 0.331 |
| 1.38910320572799e-95  | 0 CALR Naive 2     |       |       |
| 1.48993849664949e-99  | -0.300923813795117 | 0.222 | 0.375 |
| 2.65641134567637e-95  | 0 POLR2K Naive 2   |       |       |
| 2.04921517979046e-99  | -0.44808007199424  | 0.057 | 0.14  |
| 3.65354574404841e-95  | 0 LGALS3 Naive 2   |       |       |
| 2.09362205278775e-99  | -0.337904321916411 | 0.224 | 0.372 |
| 3.73271875791528e-95  | 0 RBM17 Naive 2    |       |       |
| 2.25132157350475e-99  | -0.318930063700865 | 0.273 | 0.426 |
| 4.01388123340162e-95  | 0 ENY2 Naive 2     |       |       |
| 2.65300566629594e-99  | -0.325684549901697 | 0.32  | 0.472 |
| 4.73004380243903e-95  | 0 ATP5F1C Naive 2  |       |       |

|                      |                    |       |       |
|----------------------|--------------------|-------|-------|
| 3.05024546235465e-99 | -0.356841080718384 | 0.624 | 0.72  |
| 5.4382826348321e-95  | 0 TPI1 Naive 2     |       |       |
| 5.92995904314639e-99 | -0.331204734583946 | 0.201 | 0.348 |
| 1.05725239780257e-94 | 0 HSBP1 Naive 2    |       |       |
| 1.01576441376093e-98 | -0.323543599279801 | 0.297 | 0.443 |
| 1.81100637329437e-94 | 0 NUDC Naive 2     |       |       |
| 1.28174209099979e-98 | -0.303270323940814 | 0.2   | 0.34  |
| 2.28521797404353e-94 | 0 TCP1 Naive 2     |       |       |
| 1.69994326425716e-98 | -0.384896472107333 | 0.217 | 0.349 |
| 3.03082884584409e-94 | 0 PMAIP1 Naive 2   |       |       |
| 2.4597473077777e-98  | -0.304424241853673 | 0.18  | 0.316 |
| 4.38548347503686e-94 | 0 SSRP1 Naive 2    |       |       |
| 2.95687536513637e-98 | -0.426531462080715 | 0.32  | 0.445 |
| 5.27181308850164e-94 | 0 DEK Naive 2      |       |       |
| 3.32011751174032e-98 | -0.338681531107084 | 0.076 | 0.183 |
| 5.91943751168182e-94 | 0 DEF8 Naive 2     |       |       |
| 7.57688866072504e-98 | -0.301907303125131 | 0.044 | 0.136 |
| 1.35088347932067e-93 | 0 VNN2 Naive 2     |       |       |
| 7.64080607684238e-98 | 0.388785820150198  | 0.406 | 0.314 |
| 1.36227931544023e-93 | 0 SMC6 Naive 2     |       |       |
| 9.35190145424879e-98 | -0.345597091086671 | 0.143 | 0.271 |
| 1.66735051027802e-93 | 0 SH3KBP1 Naive 2  |       |       |
| 1.12735963281863e-97 | -0.320510815309792 | 0.497 | 0.627 |
| 2.00996948935233e-93 | 0 PSMB3 Naive 2    |       |       |
| 1.86220504833143e-97 | -0.306773884116873 | 0.538 | 0.67  |
| 3.32012538067011e-93 | 0 UQCR11 Naive 2   |       |       |
| 1.94356190823102e-97 | -0.303195568590873 | 0.214 | 0.363 |
| 3.46517652618509e-93 | 0 BUD31 Naive 2    |       |       |
| 5.28794935834733e-97 | -0.340164999335369 | 0.311 | 0.461 |
| 9.42788491099746e-93 | 0 ROM01 Naive 2    |       |       |
| 7.59651788740201e-97 | -0.329674514930067 | 0.123 | 0.247 |
| 1.3543831741449e-92  | 0 KDELR2 Naive 2   |       |       |
| 2.21248205074565e-96 | -0.329775482172134 | 0.231 | 0.376 |
| 3.94463424827441e-92 | 0 MRPS6 Naive 2    |       |       |
| 3.08910384694713e-96 | -0.306910575581688 | 0.175 | 0.319 |
| 5.50756324872204e-92 | 0 LYPLA1 Naive 2   |       |       |
| 2.254802878332e-95   | -0.351846195020612 | 0.033 | 0.103 |
| 4.02008805177811e-91 | 0 FKBP11 Naive 2   |       |       |
| 2.94165762349739e-95 | -0.302984424892813 | 0.258 | 0.409 |
| 5.24468137693349e-91 | 0 ATP6V0B Naive 2  |       |       |
| 3.14288166033946e-95 | -0.409370293636856 | 0.226 | 0.361 |
| 5.60344371221922e-91 | 0 SPIB Naive 2     |       |       |
| 7.09251074358654e-95 | -0.306509101686393 | 0.39  | 0.534 |
| 1.26452374047404e-90 | 0 PSMD8 Naive 2    |       |       |
| 1.18393874926084e-94 | -0.369763802517733 | 0.075 | 0.178 |
| 2.11084439605715e-90 | 0 C12orf75 Naive 2 |       |       |
| 1.3837637001816e-94  | -0.409046964361775 | 0.033 | 0.106 |
| 2.46711230105378e-90 | 0 CCNB1 Naive 2    |       |       |
| 3.04848890116442e-94 | -0.314065141007738 | 0.134 | 0.257 |
| 5.43515086188605e-90 | 0 NIFK Naive 2     |       |       |

|                      |                     |       |       |
|----------------------|---------------------|-------|-------|
| 3.33572398992171e-94 | 0.365549289157347   | 0.388 | 0.306 |
| 5.94726230163141e-90 | 0 LTA4H Naive 2     |       |       |
| 5.63046224766228e-94 | -0.488535991799791  | 0.82  | 0.858 |
| 1.00385511413571e-89 | 0 ATP5MG Naive 2    |       |       |
| 1.32768357300049e-93 | -0.305718798589789  | 0.234 | 0.376 |
| 2.36712704230258e-89 | 0 CHMP4B Naive 2    |       |       |
| 1.85358240357268e-93 | -0.405905428317171  | 0.296 | 0.431 |
| 3.30475206732972e-89 | 0 PPIB Naive 2      |       |       |
| 3.09173213726367e-93 | -0.375101904246877  | 0.077 | 0.17  |
| 5.5122492275274e-89  | 0 MCM7 Naive 2      |       |       |
| 1.26855495013194e-92 | -0.314880924833786  | 0.057 | 0.155 |
| 2.26170662059024e-88 | 0 SIT1 Naive 2      |       |       |
| 3.19876852907444e-92 | -0.303022033388347  | 0.399 | 0.544 |
| 5.70308441048681e-88 | 0 PSMB6 Naive 2     |       |       |
| 4.50167663122015e-92 | -0.382057330982585  | 0.132 | 0.236 |
| 8.0260392658024e-88  | 0 EIF4EBP1 Naive 2  |       |       |
| 7.25020192225382e-92 | -0.408967197565962  | 0.221 | 0.351 |
| 1.29263850071863e-87 | 0 HNRNPH1 Naive 2   |       |       |
| 9.01409488513671e-92 | -0.565624547841384  | 0.723 | 0.777 |
| 1.60712297707102e-87 | 0 HMGN1 Naive 2     |       |       |
| 1.52271477163695e-91 | -0.304971020992355  | 0.133 | 0.261 |
| 2.71484816635152e-87 | 0 ZBTB80S Naive 2   |       |       |
| 1.89089424519966e-91 | -0.34015357463778   | 0.193 | 0.327 |
| 3.37127534976647e-87 | 0 CD99 Naive 2      |       |       |
| 2.00361402245567e-91 | -0.306398261959759  | 0.156 | 0.293 |
| 3.57224344063621e-87 | 0 TOP1 Naive 2      |       |       |
| 3.18193303597814e-91 | -0.348628246427279  | 0.336 | 0.467 |
| 5.67306840984542e-87 | 0 C1QBP Naive 2     |       |       |
| 3.32421096674651e-91 | -0.328141732498587  | 0.04  | 0.117 |
| 5.92673573261235e-87 | 0 RMI2 Naive 2      |       |       |
| 4.33357295791126e-91 | 0.334602472763803   | 0.388 | 0.278 |
| 7.72632722665998e-87 | 0 LINC00926 Naive 2 |       |       |
| 8.15263761234858e-91 | -0.309313408696392  | 0.092 | 0.208 |
| 1.45353375990563e-86 | 0 PRPSAP2 Naive 2   |       |       |
| 1.49590602205506e-90 | -0.301794054376029  | 0.371 | 0.514 |
| 2.66705084672197e-86 | 0 CCT8 Naive 2      |       |       |
| 1.98952673997619e-90 | 0.329176319029662   | 0.153 | 0.075 |
| 3.54712722470355e-86 | 0 CNN3 Naive 2      |       |       |
| 3.18023890288155e-90 | -0.354038534920783  | 0.142 | 0.261 |
| 5.67004793994751e-86 | 0 MYDGF Naive 2     |       |       |
| 7.23180560192307e-90 | -0.311837132048675  | 0.128 | 0.249 |
| 1.28935862076686e-85 | 0 SINHCAF Naive 2   |       |       |
| 1.57363909757472e-89 | -0.309988801440635  | 0.329 | 0.469 |
| 2.80564114706598e-85 | 0 PGAM1 Naive 2     |       |       |
| 4.70812591002838e-89 | -0.322551967029141  | 0.627 | 0.724 |
| 8.39411768498959e-85 | 0 NDUFA4 Naive 2    |       |       |
| 1.28908293847347e-88 | -0.381703950480696  | 0.086 | 0.186 |
| 2.29830597100436e-84 | 0 SMC4 Naive 2      |       |       |
| 1.39876479432941e-88 | -0.382647958095558  | 0.374 | 0.507 |
| 2.4938577518099e-84  | 0 RPS27L Naive 2    |       |       |

|                      |                    |       |       |
|----------------------|--------------------|-------|-------|
| 3.53111793162589e-88 | -0.321573991066908 | 0.302 | 0.444 |
| 6.2956301602958e-84  | 0 HNRNPD Naive 2   |       |       |
| 3.21382406591108e-87 | 0.308780113904367  | 0.709 | 0.636 |
| 5.72992692711287e-83 | 0 ZFP36L1 Naive 2  |       |       |
| 3.43034246675621e-86 | -0.410829826028031 | 0.269 | 0.397 |
| 6.11595758397965e-82 | 0 ACADM Naive 2    |       |       |
| 4.40699538028221e-86 | 0.343402101503514  | 0.171 | 0.104 |
| 7.85723206350515e-82 | 0 ENTPD1 Naive 2   |       |       |
| 1.35909959679921e-85 | -0.33746899258238  | 0.396 | 0.53  |
| 2.4231386711333e-81  | 0 MZT2B Naive 2    |       |       |
| 2.28945631270336e-85 | 0.332846008006851  | 0.162 | 0.098 |
| 4.08187165991883e-81 | 0 ETHE1 Naive 2    |       |       |
| 3.46399271010578e-85 | -0.303121158657959 | 0.232 | 0.369 |
| 6.1759526028476e-81  | 0 LSM6 Naive 2     |       |       |
| 5.27440850468674e-85 | -0.31263822509545  | 0.336 | 0.481 |
| 9.403742923006e-81   | 0 CAPZA1 Naive 2   |       |       |
| 8.72791919698108e-85 | -0.622248921487094 | 0.89  | 0.887 |
| 1.55610071362976e-80 | 0 GAPDH Naive 2    |       |       |
| 1.8728443149249e-84  | -0.304698256838658 | 0.599 | 0.702 |
| 3.3390941290796e-80  | 0 COX6A1 Naive 2   |       |       |
| 2.96383713394259e-84 | -0.330847454966468 | 0.164 | 0.283 |
| 5.28422522610625e-80 | 0 ANP32E Naive 2   |       |       |
| 1.87706924350726e-83 | -0.35611480984669  | 0.055 | 0.134 |
| 3.34662675424909e-79 | 0 LPP Naive 2      |       |       |
| 2.52145369538396e-83 | -0.331637082612759 | 0.311 | 0.453 |
| 4.49549979350006e-79 | 0 DNAJA1 Naive 2   |       |       |
| 7.1241285943354e-83  | 0.304760279573011  | 0.523 | 0.432 |
| 1.27016088708406e-78 | 0 PNRC1 Naive 2    |       |       |
| 5.96074094568294e-81 | 0.321768409404631  | 0.261 | 0.181 |
| 1.06274050320581e-76 | 0 FAM129C Naive 2  |       |       |
| 2.53753856080354e-80 | 0.348996721823768  | 0.4   | 0.312 |
| 4.52417750005662e-76 | 0 PTPN6 Naive 2    |       |       |
| 4.01631545146071e-79 | -0.319177589229938 | 0.334 | 0.464 |
| 7.16068881840929e-75 | 0 PPA1 Naive 2     |       |       |
| 2.37465101885361e-78 | 0.353251985609684  | 0.405 | 0.328 |
| 4.23376530151411e-74 | 0 PKIG Naive 2     |       |       |
| 3.21028596989318e-78 | -0.315050885433126 | 0.193 | 0.311 |
| 5.72361885572255e-74 | 0 YWHAH Naive 2    |       |       |
| 6.44122875124009e-78 | -0.321748811095151 | 0.182 | 0.311 |
| 1.1484066740586e-73  | 0 TUBA4A Naive 2   |       |       |
| 1.04517092584677e-77 | 0.334099246190617  | 0.23  | 0.143 |
| 1.8634352436922e-73  | 0 SLC2A3 Naive 2   |       |       |
| 1.26254752570235e-77 | -0.371791309069589 | 0.581 | 0.673 |
| 2.25099598357471e-73 | 0 SLC25A5 Naive 2  |       |       |
| 2.00920271863716e-76 | -0.530090601498319 | 0.455 | 0.55  |
| 3.5822075270582e-72  | 0 ISG20 Naive 2    |       |       |
| 2.05888321039362e-75 | -0.368753830186924 | 0.846 | 0.874 |
| 3.67078287581078e-71 | 0 ARPC2 Naive 2    |       |       |
| 6.48341009896065e-75 | -0.340477236654589 | 0.293 | 0.424 |
| 1.15592718654369e-70 | 0 RPL22L1 Naive 2  |       |       |

|                      |                        |       |       |
|----------------------|------------------------|-------|-------|
| 1.3640003866057e-73  | -0.318164985396187     | 0.389 | 0.51  |
| 2.4318762892793e-69  | 0 CBX3 Naive 2         |       |       |
| 3.45220219899905e-73 | 0.357499372627659      | 0.202 | 0.123 |
| 6.1549313005954e-69  | 0 FCER2 Naive 2        |       |       |
| 1.85680229089929e-71 | -0.348962675720916     | 0.167 | 0.278 |
| 3.31049280444435e-67 | 0 SYNE2 Naive 2        |       |       |
| 2.2638707607658e-71  | -0.424829265507558     | 0.726 | 0.768 |
| 4.03625517936934e-67 | 0 PKM Naive 2          |       |       |
| 1.13722168273506e-70 | 0.313386737245121      | 0.346 | 0.265 |
| 2.02755253814834e-66 | 0 IFITM2 Naive 2       |       |       |
| 5.98780605504133e-70 | -0.359703076616626     | 0.395 | 0.512 |
| 1.06756594155332e-65 | 0 C4orf3 Naive 2       |       |       |
| 6.58165848359373e-70 | -0.337832702307134     | 0.097 | 0.177 |
| 1.17344389103993e-65 | 0 MARCKS Naive 2       |       |       |
| 1.39073935953147e-69 | -0.318136471358799     | 0.263 | 0.388 |
| 2.47954920410867e-65 | 0 SELENOK Naive 2      |       |       |
| 2.4503595157766e-69  | -0.542967356582975     | 0.517 | 0.581 |
| 4.3687459806781e-65  | 0 VIM Naive 2          |       |       |
| 5.67818683369627e-69 | -0.430216241862279     | 0.689 | 0.745 |
| 1.01236393057971e-64 | 0 HSPA8 Naive 2        |       |       |
| 7.94777409495159e-69 | -0.371488643642828     | 0.086 | 0.165 |
| 1.41700864338892e-64 | 0 NFKBID Naive 2       |       |       |
| 1.1219969410354e-68  | -0.318026064984386     | 0.59  | 0.695 |
| 2.00040834617201e-64 | 0 TAGLN2 Naive 2       |       |       |
| 3.14902040784627e-68 | -0.305317518109875     | 0.047 | 0.123 |
| 5.61438848514911e-64 | 0 CD9 Naive 2          |       |       |
| 2.6270630781557e-66  | 0.30469574424962 0.475 | 0.401 |       |
| 4.68379076204379e-62 | 0 NPC2 Naive 2         |       |       |
| 1.12418832601127e-65 | -0.40918333342462      | 0.248 | 0.353 |
| 2.00431536644549e-61 | 0 DUT Naive 2          |       |       |
| 1.62527423896454e-65 | 0.309988313628007      | 0.286 | 0.217 |
| 2.89770144064989e-61 | 0 NT5C3A Naive 2       |       |       |
| 4.4337843895781e-65  | -0.328873415863836     | 0.3   | 0.417 |
| 7.9049941881788e-61  | 0 NUCKS1 Naive 2       |       |       |
| 7.20993892156435e-62 | -0.806437925784797     | 0.373 | 0.439 |
| 1.28546001032571e-57 | 0 STMN1 Naive 2        |       |       |
| 3.42985599422985e-61 | -0.831482551502514     | 0.215 | 0.273 |
| 6.11509025211241e-57 | 0 S100A4 Naive 2       |       |       |
| 9.03834906463721e-59 | -0.450361004630198     | 0.931 | 0.934 |
| 1.61144725473417e-54 | 0 SERF2 Naive 2        |       |       |
| 1.20067767333745e-57 | -0.305200759040001     | 0.127 | 0.223 |
| 2.14068822379333e-53 | 0 EAF2 Naive 2         |       |       |
| 2.16722428762994e-57 | -1.32856706123278      | 0.351 | 0.437 |
| 3.86394418241543e-53 | 0 HIST1H4C Naive 2     |       |       |
| 5.87497142800676e-56 | -0.323108505011021     | 0.119 | 0.202 |
| 1.04744865589932e-51 | 0 PCNA Naive 2         |       |       |
| 5.05762487869535e-55 | -0.308230164648268     | 0.291 | 0.418 |
| 9.01723939622595e-51 | 0 CSTB Naive 2         |       |       |
| 2.87761845012175e-54 | -0.317094626671055     | 0.206 | 0.317 |
| 5.13050593472207e-50 | 0 TCF4 Naive 2         |       |       |



|                      |                    |       |       |   |           |
|----------------------|--------------------|-------|-------|---|-----------|
| 3.04689122828152e-54 | -0.345170850469339 | 0.213 | 0.321 |   |           |
| 5.43230237090313e-50 | 0 BCL7A Naive 2    |       |       |   |           |
| 3.56666362233008e-53 | -0.325404957310689 | 0.052 | 0.104 |   |           |
| 6.3590045722523e-49  | 0 KLK1 Naive 2     |       |       |   |           |
| 2.98750940374627e-52 | -0.34303837566308  | 0.218 | 0.311 |   |           |
| 5.32643051593923e-48 | 0 NFKBIA Naive 2   |       |       |   |           |
| 4.49440797833476e-52 | -0.333769340728705 | 0.178 | 0.273 |   |           |
| 8.01307998457305e-48 | 0 MDM4 Naive 2     |       |       |   |           |
| 6.54884345481784e-51 | -2.30965926361715  | 0.073 | 0.137 |   |           |
| 1.16759329955947e-46 | 0 IGHG2 Naive 2    |       |       |   |           |
| 4.95499151704199e-50 | -0.322682304400916 | 0.066 | 0.121 |   |           |
| 8.83425437573416e-46 | 0 Clorf56 Naive 2  |       |       |   |           |
| 1.10957381503347e-49 | -1.95456999966591  | 0.18  | 0.256 |   |           |
| 1.97825915482317e-45 | 0 IGHG4 Naive 2    |       |       |   |           |
| 5.2322292300358e-49  | -0.354030582344416 | 0.72  | 0.771 |   |           |
| 9.32854149423083e-45 | 0 CYBA Naive 2     |       |       |   |           |
| 8.39108954920451e-47 | -0.726688039765604 | 0.685 | 0.722 |   |           |
| 1.49604735572767e-42 | 0 HMGN2 Naive 2    |       |       |   |           |
| 6.82914483147198e-44 | -0.450248485276305 | 0.929 | 0.932 |   |           |
| 1.21756823200314e-39 | 0 HMGB1 Naive 2    |       |       |   |           |
| 1.03884998281284e-38 | -0.441942210889819 | 0.432 | 0.513 |   |           |
| 1.85216563435701e-34 | 0 SSR4 Naive 2     |       |       |   |           |
| 7.02666432151862e-27 | -0.309953049509448 | 0.939 | 0.928 |   |           |
| 1.25278398188355e-22 | 0 NPM1 Naive 2     |       |       |   |           |
| 2.06565561794793e-20 | -0.727219417164255 | 0.156 | 0.223 |   |           |
| 3.68285740123936e-16 | 0 PLCG2 Naive 2    |       |       |   |           |
| 9.89846946890283e-17 | -0.394894831554688 | 0.86  | 0.846 |   |           |
| 1.76479812161069e-12 | 0 HSP90AB1 Naive 2 |       |       |   |           |
| 2.26493136415457e-08 | -0.310944810330708 | 0.793 | 0.784 |   |           |
| 0.000403814612915119 | 0 ACTG1 Naive 2    |       |       |   |           |
| 2.9275809859743e-08  | -1.15966971785123  | 0.403 | 0.434 |   |           |
| 0.000521958413989359 | 0 IGLC3 Naive 2    |       |       |   |           |
| 0.000490229942859223 | -1.03825869235442  | 0.912 | 0.929 | 1 |           |
| 0                    | IGKC Naive 2       |       |       |   |           |
| 0.00582875899481827  | -1.61244335182059  | 0.608 | 0.652 | 1 |           |
| 0                    | IGLC2 Naive 2      |       |       |   |           |
| 0                    | 1.62640448940425   | 0.691 | 0.327 | 0 | 1 SELL    |
| Naive 1              |                    |       |       |   |           |
| 0                    | 1.4569475157633    | 0.95  | 0.723 | 0 | 1 CXCR4   |
| Naive 1              |                    |       |       |   |           |
| 0                    | 1.37014617049403   | 0.515 | 0.24  | 0 | 1 KLF2    |
| Naive 1              |                    |       |       |   |           |
| 0                    | 1.12052718981081   | 0.401 | 0.185 | 0 | 1 PLAC8   |
| Naive 1              |                    |       |       |   |           |
| 0                    | 1.07245100439787   | 0.386 | 0.217 | 0 | 1 CD55    |
| Naive 1              |                    |       |       |   |           |
| 0                    | 1.04807980200102   | 0.449 | 0.282 | 0 | 1 ZFP36L2 |
| Naive 1              |                    |       |       |   |           |
| 0                    | 0.920022166919104  | 0.75  | 0.452 | 0 | 1 LTB     |
| Naive 1              |                    |       |       |   |           |

|         |                    |       |       |   |   |       |
|---------|--------------------|-------|-------|---|---|-------|
| 0       | 0.896449716084155  | 0.77  | 0.583 | 0 | 1 |       |
| IGHD    | Naive 1            |       |       |   |   |       |
| 0       | 0.769311376153668  | 0.968 | 0.931 | 0 | 1 |       |
| BTG1    | Naive 1            |       |       |   |   |       |
| 0       | 0.755657277672165  | 0.904 | 0.84  | 0 | 1 |       |
| CD37    | Naive 1            |       |       |   |   |       |
| 0       | 0.730873185117909  | 0.998 | 0.984 | 0 | 1 |       |
| TMSB10  | Naive 1            |       |       |   |   |       |
| 0       | 0.670396024214154  | 1     | 1     | 0 | 1 |       |
| MALAT1  | Naive 1            |       |       |   |   |       |
| 0       | 0.660507967673452  | 0.946 | 0.857 | 0 | 1 |       |
| CD52    | Naive 1            |       |       |   |   |       |
| 0       | 0.59892571787207   | 0.998 | 0.894 | 0 | 1 | IGHM  |
| Naive 1 |                    |       |       |   |   |       |
| 0       | 0.342707348770136  | 1     | 0.998 | 0 | 1 | B2M   |
|         | Naive 1            |       |       |   |   |       |
| 0       | 0.319782592951137  | 1     | 1     | 0 | 1 |       |
| RPS27   | Naive 1            |       |       |   |   |       |
| 0       | -0.513550939309875 | 0.566 | 0.836 | 0 | 1 |       |
| RPS26   | Naive 1            |       |       |   |   |       |
| 0       | -0.567286162008272 | 0.697 | 0.894 | 0 | 1 |       |
| ARPC2   | Naive 1            |       |       |   |   |       |
| 0       | -0.567990110131293 | 0.318 | 0.645 | 0 | 1 |       |
| PSMB3   | Naive 1            |       |       |   |   |       |
| 0       | -0.573125057462614 | 0.516 | 0.793 | 0 | 1 |       |
| PSMA7   | Naive 1            |       |       |   |   |       |
| 0       | -0.5756266690887   | 0.281 | 0.606 | 0 | 1 | UQCRQ |
| Naive 1 |                    |       |       |   |   |       |
| 0       | -0.582548280444209 | 0.368 | 0.696 | 0 | 1 |       |
| PSMB1   | Naive 1            |       |       |   |   |       |
| 0       | -0.585836981928602 | 0.456 | 0.76  | 0 | 1 |       |
| COX6C   | Naive 1            |       |       |   |   |       |
| 0       | -0.588788279772904 | 0.923 | 0.984 | 0 | 1 |       |
| RPS24   | Naive 1            |       |       |   |   |       |
| 0       | -0.603624201798462 | 0.34  | 0.673 | 0 | 1 |       |
| COX7B   | Naive 1            |       |       |   |   |       |
| 0       | -0.604539490290965 | 0.331 | 0.646 | 0 | 1 |       |
| POMP    | Naive 1            |       |       |   |   |       |
| 0       | -0.626157610317502 | 0.316 | 0.649 | 0 | 1 |       |
| POLR2L  | Naive 1            |       |       |   |   |       |
| 0       | -0.638654654358515 | 0.807 | 0.944 | 0 | 1 |       |
| HNRNPA1 | Naive 1            |       |       |   |   |       |
| 0       | -0.655321862135901 | 0.434 | 0.741 | 0 | 1 |       |
| TPI1    | Naive 1            |       |       |   |   |       |
| 0       | -0.657586286237126 | 0.425 | 0.746 | 0 | 1 |       |
| NDUFA4  | Naive 1            |       |       |   |   |       |
| 0       | -0.669003181483911 | 0.347 | 0.674 | 0 | 1 |       |
| PSMA4   | Naive 1            |       |       |   |   |       |
| 0       | -0.672390040848006 | 0.263 | 0.595 | 0 | 1 |       |
| SEC61G  | Naive 1            |       |       |   |   |       |

|         |                    |       |       |   |   |     |
|---------|--------------------|-------|-------|---|---|-----|
| 0       | -0.681655026267257 | 0.374 | 0.726 | 0 | 1 |     |
| SLC25A3 | Naive 1            |       |       |   |   |     |
| 0       | -0.692871884665234 | 0.292 | 0.649 | 0 | 1 |     |
| RBM3    | Naive 1            |       |       |   |   |     |
| 0       | -0.699262095483764 | 0.164 | 0.481 | 0 | 1 |     |
| PPA1    | Naive 1            |       |       |   |   |     |
| 0       | -0.699264986439557 | 0.856 | 0.954 | 0 | 1 |     |
| YBX1    | Naive 1            |       |       |   |   |     |
| 0       | -0.710311962647316 | 0.275 | 0.613 | 0 | 1 |     |
| SNRPE   | Naive 1            |       |       |   |   |     |
| 0       | -0.719069265614345 | 0.034 | 0.262 | 0 | 1 |     |
| MTHFD2  | Naive 1            |       |       |   |   |     |
| 0       | -0.725950554264534 | 0.348 | 0.677 | 0 | 1 | SET |
|         | Naive 1            |       |       |   |   |     |
| 0       | -0.734684478048692 | 0.745 | 0.921 | 0 | 1 |     |
| PFN1    | Naive 1            |       |       |   |   |     |
| 0       | -0.738632760245737 | 0.299 | 0.639 | 0 | 1 |     |
| SEC61B  | Naive 1            |       |       |   |   |     |
| 0       | -0.751253438288004 | 0.243 | 0.569 | 0 | 1 |     |
| PSME2   | Naive 1            |       |       |   |   |     |
| 0       | -0.755454925827904 | 0.072 | 0.335 | 0 | 1 |     |
| ODC1    | Naive 1            |       |       |   |   |     |
| 0       | -0.759516031728475 | 0.274 | 0.628 | 0 | 1 |     |
| ATP5MC3 | Naive 1            |       |       |   |   |     |
| 0       | -0.774145198035019 | 0.537 | 0.8   | 0 | 1 |     |
| HMG1    | Naive 1            |       |       |   |   |     |
| 0       | -0.777663593018135 | 0.218 | 0.536 | 0 | 1 |     |
| HSPE1   | Naive 1            |       |       |   |   |     |
| 0       | -0.781688536896334 | 0.383 | 0.721 | 0 | 1 |     |
| SRSF3   | Naive 1            |       |       |   |   |     |
| 0       | -0.784346024161547 | 0.322 | 0.635 | 0 | 1 |     |
| LDHA    | Naive 1            |       |       |   |   |     |
| 0       | -0.784430743230117 | 0.183 | 0.514 | 0 | 1 |     |
| SNRPD1  | Naive 1            |       |       |   |   |     |
| 0       | -0.799535525898772 | 0.272 | 0.622 | 0 | 1 |     |
| LDHB    | Naive 1            |       |       |   |   |     |
| 0       | -0.816593859975745 | 0.133 | 0.435 | 0 | 1 |     |
| BASP1   | Naive 1            |       |       |   |   |     |
| 0       | -0.833968069223933 | 0.107 | 0.433 | 0 | 1 |     |
| YWHAE   | Naive 1            |       |       |   |   |     |
| 0       | -0.835905411143201 | 0.8   | 0.948 | 0 | 1 |     |
| NPM1    | Naive 1            |       |       |   |   |     |
| 0       | -0.864634788962167 | 0.501 | 0.782 | 0 | 1 | RAN |
|         | Naive 1            |       |       |   |   |     |
| 0       | -0.866146860276722 | 0.144 | 0.481 | 0 | 1 |     |
| HMGA1   | Naive 1            |       |       |   |   |     |
| 0       | -0.921560897319187 | 0.161 | 0.503 | 0 | 1 |     |
| HSPD1   | Naive 1            |       |       |   |   |     |
| 0       | -1.06064792761773  | 0.05  | 0.334 | 0 | 1 |     |
| NME1    | Naive 1            |       |       |   |   |     |

|                       |                        |       |       |         |       |      |
|-----------------------|------------------------|-------|-------|---------|-------|------|
| 0                     | -1.06680456548166      | 0.556 | 0.818 | 0       | 1     |      |
| ACTG1                 | Naive 1                |       |       |         |       |      |
| 0                     | -1.0722828797469 0.287 | 0.617 | 0     | 1       | 1     | TUBB |
| Naive 1               |                        |       |       |         |       |      |
| 0                     | -1.11996806331772      | 0.053 | 0.338 | 0       | 1     |      |
| CD27                  | Naive 1                |       |       |         |       |      |
| 0                     | -1.14251028249994      | 0.111 | 0.45  | 0       | 1     | TXN  |
|                       | Naive 1                |       |       |         |       |      |
| 0                     | -1.15775951142291      | 0.272 | 0.644 | 0       | 1     |      |
| PRDX1                 | Naive 1                |       |       |         |       |      |
| 0                     | -1.23767549092402      | 0.405 | 0.782 | 0       | 1     |      |
| HSPA8                 | Naive 1                |       |       |         |       |      |
| 0                     | -1.30442695651224      | 0.397 | 0.759 | 0       | 1     |      |
| EN01                  | Naive 1                |       |       |         |       |      |
| 0                     | -1.33831984411749      | 0.596 | 0.883 | 0       | 1     |      |
| HSP90AB1              | Naive 1                |       |       |         |       |      |
| 0                     | -1.39139373768553      | 0.672 | 0.918 | 0       | 1     |      |
| GAPDH                 | Naive 1                |       |       |         |       |      |
| 0                     | -1.40969168148133      | 0.023 | 0.232 | 0       | 1     |      |
| RGS13                 | Naive 1                |       |       |         |       |      |
| 0                     | -1.41401053744144      | 0.391 | 0.812 | 0       | 1     | PKM  |
|                       | Naive 1                |       |       |         |       |      |
| 0                     | -1.63640415521685      | 0.055 | 0.319 | 0       | 1     |      |
| MIR155HG              | Naive 1                |       |       |         |       |      |
| 0                     | -1.67313077943232      | 0.066 | 0.451 | 0       | 1     |      |
| FABP5                 | Naive 1                |       |       |         |       |      |
| 8.39911597930119e-322 | -0.554888129003236     |       |       | 0.5     | 0.778 |      |
| 1.49747838794961e-317 | 1 CHCHD2 Naive 1       |       |       |         |       |      |
| 5.06911352633119e-321 | -0.588049387247989     |       |       | 0.217   | 0.537 |      |
| 9.03772250609588e-317 | 1 COX5A Naive 1        |       |       |         |       |      |
| 4.74401833136765e-320 | -0.583276896683403     |       |       | 0.352   | 0.666 |      |
| 8.45811028299538e-316 | 1 ATP5F1B Naive 1      |       |       |         |       |      |
| 5.00043840155926e-320 | -0.640486374055294     |       |       | 0.047   | 0.281 |      |
| 8.91528162614e-316    | 1 RGS10 Naive 1        |       |       |         |       |      |
| 3.08074633464309e-319 | 0.946543474692797      |       |       | 0.45    | 0.275 |      |
| 5.49266264003517e-315 | 1 LINC00926            |       |       | Naive 1 |       |      |
| 3.35709701298794e-318 | -0.530942375237538     |       |       | 0.415   | 0.722 |      |
| 5.98536826445619e-314 | 1 COX6A1 Naive 1       |       |       |         |       |      |
| 3.44651873485246e-315 | -0.743835456371955     |       |       | 0.221   | 0.521 |      |
| 6.14479825236846e-311 | 1 RANBP1 Naive 1       |       |       |         |       |      |
| 4.22474285254963e-315 | -0.881806273081223     |       |       | 0.449   | 0.73  |      |
| 7.53229403181073e-311 | 1 H2AFZ Naive 1        |       |       |         |       |      |
| 1.6370964590839e-313  | -0.577592852796168     |       |       | 0.375   | 0.683 |      |
| 2.91877927690068e-309 | 1 SNRPG Naive 1        |       |       |         |       |      |
| 3.82232337080437e-312 | -0.514070150462151     |       |       | 0.436   | 0.737 |      |
| 6.81482033780712e-308 | 1 ELOB Naive 1         |       |       |         |       |      |
| 2.45705531124706e-311 | -0.880943051030122     |       |       | 0.111   | 0.372 |      |
| 4.38068391442238e-307 | 1 LRMP Naive 1         |       |       |         |       |      |
| 2.67583056535981e-311 | -0.613676875871861     |       |       | 0.178   | 0.487 |      |
| 4.77073831498e-307    | 1 ILF2 Naive 1         |       |       |         |       |      |

|                       |                    |       |       |
|-----------------------|--------------------|-------|-------|
| 9.11286855029533e-311 | 0.842956498529853  | 0.667 | 0.564 |
| 1.62473333383215e-306 | 1 SARAF Naive 1    |       |       |
| 4.69449083772804e-310 | 0.951343122430512  | 0.351 | 0.192 |
| 8.36980771458533e-306 | 1 LBH Naive 1      |       |       |
| 9.92239386633841e-308 | -0.591601231928349 | 0.286 | 0.597 |
| 1.76906360242947e-303 | 1 ATP5PF Naive 1   |       |       |
| 2.1334338131615e-307  | -0.690280612431656 | 0.518 | 0.779 |
| 3.80369914548563e-303 | 1 HSP90AA1 Naive 1 |       |       |
| 1.18759722982466e-301 | -0.532926500785889 | 0.369 | 0.678 |
| 2.11736710105439e-297 | 1 ATP5MF Naive 1   |       |       |
| 1.93305298564758e-300 | -0.602513913283698 | 0.182 | 0.485 |
| 3.44644016811108e-296 | 1 SEM1 Naive 1     |       |       |
| 6.65337327606713e-299 | -0.506219658803067 | 0.363 | 0.677 |
| 1.18622992139001e-294 | 1 ATP5MD Naive 1   |       |       |
| 6.12949437687091e-296 | -0.558463821181197 | 0.144 | 0.441 |
| 1.09282755245231e-291 | 1 PSMB2 Naive 1    |       |       |
| 1.76890950159658e-293 | 0.641187853588227  | 0.867 | 0.791 |
| 3.15378875039654e-289 | 1 LAPTM5 Naive 1   |       |       |
| 7.74715532644385e-293 | -0.537471253966111 | 0.228 | 0.542 |
| 1.38124032315167e-288 | 1 EIF3I Naive 1    |       |       |
| 4.08839387032352e-292 | -0.422747103527583 | 0.965 | 0.991 |
| 7.28919743139981e-288 | 1 RPLP0 Naive 1    |       |       |
| 6.06158507330107e-290 | -0.51979865836736  | 0.8   | 0.935 |
| 1.08072000271885e-285 | 1 CFL1 Naive 1     |       |       |
| 1.18642787729777e-289 | -0.609087780576865 | 0.14  | 0.428 |
| 2.11528226243419e-285 | 1 PHB Naive 1      |       |       |
| 1.068972850369e-287   | -0.582574129060375 | 0.261 | 0.57  |
| 1.90587169492288e-283 | 1 IMPDH2 Naive 1   |       |       |
| 7.67999163712551e-286 | -0.650480531014504 | 0.1   | 0.361 |
| 1.36926570898311e-281 | 1 RFTN1 Naive 1    |       |       |
| 1.20647066244058e-283 | -0.658697193960214 | 0.14  | 0.419 |
| 2.15101654406531e-279 | 1 NHP2 Naive 1     |       |       |
| 2.42498547916923e-283 | -0.951288688725845 | 0.027 | 0.213 |
| 4.32350661081083e-279 | 1 PTTG1 Naive 1    |       |       |
| 6.90591228119831e-283 | -0.570520600908627 | 0.27  | 0.571 |
| 1.23125510061485e-278 | 1 SRSF9 Naive 1    |       |       |
| 8.62358898711935e-282 | -0.61686813410379  | 0.322 | 0.62  |
| 1.53749968051351e-277 | 1 ANP32B Naive 1   |       |       |
| 1.23989729513497e-281 | -0.666555620585054 | 0.353 | 0.64  |
| 2.21061288749614e-277 | 1 DYNLL1 Naive 1   |       |       |
| 5.62915268961274e-281 | -0.594957421581009 | 0.186 | 0.481 |
| 1.00362163303106e-276 | 1 C1QBP Naive 1    |       |       |
| 1.10753747007704e-279 | -0.513667593051258 | 0.379 | 0.678 |
| 1.97462855540035e-275 | 1 HNRNPM Naive 1   |       |       |
| 3.31474598442218e-273 | -0.512317925040429 | 0.304 | 0.61  |
| 5.9098606156263e-269  | 1 PARK7 Naive 1    |       |       |
| 4.84787017153483e-272 | -0.718410581630341 | 0.175 | 0.421 |
| 8.64326772882944e-268 | 1 EIF5A Naive 1    |       |       |
| 1.79810068706812e-268 | -0.51204942061466  | 0.388 | 0.675 |
| 3.20583371497375e-264 | 1 ERH Naive 1      |       |       |

|                       |                        |       |       |
|-----------------------|------------------------|-------|-------|
| 4.79761716062092e-268 | -0.602486784735089     | 0.137 | 0.408 |
| 8.55367163567103e-264 | 1 LCP1 Naive 1         |       |       |
| 6.86145847672436e-267 | -0.468916449556134     | 0.332 | 0.638 |
| 1.22332943181519e-262 | 1 PSMA2 Naive 1        |       |       |
| 2.61964276127256e-265 | -0.425049471542781     | 0.464 | 0.752 |
| 4.67056107907284e-261 | 1 COX6B1 Naive 1       |       |       |
| 8.24546676850959e-265 | -0.5648699916594 0.098 | 0.355 |       |
| 1.47008427015758e-260 | 1 IMP4 Naive 1         |       |       |
| 9.94004461256748e-265 | 0.88102404970121 0.48  | 0.335 |       |
| 1.77221055397466e-260 | 1 TXNIP Naive 1        |       |       |
| 2.01225007479265e-264 | -0.550563708117174     | 0.205 | 0.499 |
| 3.58764065834781e-260 | 1 PRMT1 Naive 1        |       |       |
| 3.46795152809091e-263 | -0.549847528880775     | 0.411 | 0.691 |
| 6.18301077943329e-259 | 1 SLC25A5 Naive 1      |       |       |
| 4.86314391017109e-263 | -0.450194268811659     | 0.352 | 0.654 |
| 8.67049927744404e-259 | 1 NDUFA13 Naive 1      |       |       |
| 6.43564340364358e-263 | -0.569987035791326     | 0.147 | 0.423 |
| 1.14741086243561e-258 | 1 CCT5 Naive 1         |       |       |
| 3.60851350484479e-262 | 0.401275033164866      | 0.976 | 0.968 |
| 6.43361872778778e-258 | 1 MT-ND3 Naive 1       |       |       |
| 2.00924943048928e-261 | -0.724416284127308     | 0.014 | 0.167 |
| 3.58229080961933e-257 | 1 BIK Naive 1          |       |       |
| 8.88232758055433e-261 | -0.483408763078249     | 0.235 | 0.54  |
| 1.58363018433703e-256 | 1 NDUFA11 Naive 1      |       |       |
| 4.39037890954585e-257 | 0.856825679182085      | 0.597 | 0.49  |
| 7.8276065578293e-253  | 1 TSC22D3 Naive 1      |       |       |
| 6.97984299021688e-257 | -0.523216021515843     | 0.133 | 0.408 |
| 1.24443620672577e-252 | 1 PSMC1 Naive 1        |       |       |
| 5.74128845728032e-256 | 0.502966479044291      | 0.914 | 0.859 |
| 1.02361431904851e-251 | 1 CD79A Naive 1        |       |       |
| 2.04342172600622e-254 | -0.473458869589132     | 0.293 | 0.593 |
| 3.6432165952965e-250  | 1 PGK1 Naive 1         |       |       |
| 3.0482553438975e-253  | -0.786306427487123     | 0.355 | 0.621 |
| 5.43473445263486e-249 | 1 MARCKSL1 Naive 1     |       |       |
| 1.60146290271356e-251 | 0.894256736297183      | 0.454 | 0.321 |
| 2.85524820924801e-247 | 1 HVCN1 Naive 1        |       |       |
| 1.00626910641419e-250 | -0.535066111942806     | 0.2   | 0.487 |
| 1.79407718982586e-246 | 1 MRPL51 Naive 1       |       |       |
| 1.73347397535501e-250 | -0.626323460554118     | 0.098 | 0.338 |
| 3.09061075066045e-246 | 1 CALR Naive 1         |       |       |
| 2.5942011965994e-250  | -0.533937650019308     | 0.192 | 0.477 |
| 4.62520131341707e-246 | 1 CCT6A Naive 1        |       |       |
| 5.86300362530585e-250 | -0.509084133884455     | 0.19  | 0.479 |
| 1.04531491635578e-245 | 1 ATP5MC1 Naive 1      |       |       |
| 1.03188973539424e-249 | -0.487369746882761     | 0.149 | 0.429 |
| 1.8397562092344e-245  | 1 NDUFAB1 Naive 1      |       |       |
| 3.3433938886041e-249  | 0.844602012379745      | 0.158 | 0.045 |
| 5.96093696399225e-245 | 1 PPP1R14A Naive 1     |       |       |
| 1.05356777273733e-247 | -0.383249998244085     | 0.804 | 0.94  |
| 1.87840598201339e-243 | 1 BTF3 Naive 1         |       |       |

|                       |                    |       |       |
|-----------------------|--------------------|-------|-------|
| 1.06947822473125e-247 | -0.756420719382697 | 0.017 | 0.17  |
| 1.90677272687335e-243 | 1 DUSP2 Naive 1    |       |       |
| 3.67703026547673e-247 | -0.453612630683746 | 0.246 | 0.546 |
| 6.55577726031847e-243 | 1 PSMD8 Naive 1    |       |       |
| 8.71398952154086e-246 | -0.645588839962328 | 0.314 | 0.593 |
| 1.55361719179552e-241 | 1 NCL Naive 1      |       |       |
| 3.80500210863509e-245 | -0.444152616851685 | 0.253 | 0.556 |
| 6.7839382594855e-241  | 1 PSMB6 Naive 1    |       |       |
| 8.98131754019814e-245 | -0.400907386973082 | 0.444 | 0.731 |
| 1.60127910424193e-240 | 1 ATP5MPL Naive 1  |       |       |
| 1.12479584061216e-244 | -0.966259798167656 | 0.455 | 0.695 |
| 2.00539850422742e-240 | 1 TUBA1B Naive 1   |       |       |
| 3.43647996623998e-244 | -0.666005012860469 | 0.085 | 0.307 |
| 6.12690013180927e-240 | 1 SRM Naive 1      |       |       |
| 6.10404591583814e-244 | -0.502135020298955 | 0.076 | 0.31  |
| 1.08829034633478e-239 | 1 PSMD14 Naive 1   |       |       |
| 3.96598471261863e-243 | -0.551745099445847 | 0.123 | 0.38  |
| 7.07095414412776e-239 | 1 TIMM13 Naive 1   |       |       |
| 6.66916488578761e-242 | -0.53653163653908  | 0.686 | 0.874 |
| 1.18904540748707e-237 | 1 ATP5MG Naive 1   |       |       |
| 2.41126731536208e-241 | -0.482912052690098 | 0.233 | 0.525 |
| 4.29904849655905e-237 | 1 CCT3 Naive 1     |       |       |
| 6.50312809682778e-241 | -0.525145887751666 | 0.01  | 0.148 |
| 1.15944270838343e-236 | 1 PHGDH Naive 1    |       |       |
| 7.66219658253455e-241 | 0.783567686294046  | 0.182 | 0.065 |
| 1.36609302870008e-236 | 1 CALHM6 Naive 1   |       |       |
| 5.64821036114591e-240 | -0.49194898235579  | 0.256 | 0.55  |
| 1.00701942528871e-235 | 1 SSBP1 Naive 1    |       |       |
| 1.62024717033227e-239 | -0.532075772223012 | 0.185 | 0.462 |
| 2.8887386799854e-235  | 1 CCT2 Naive 1     |       |       |
| 4.52935551513923e-239 | 0.793925078018066  | 0.19  | 0.073 |
| 8.07538794794173e-235 | 1 RNASE6 Naive 1   |       |       |
| 5.3085210878371e-237  | -0.460219755219692 | 0.29  | 0.586 |
| 9.46456224750476e-233 | 1 PSMA1 Naive 1    |       |       |
| 1.00301956189869e-236 | -0.485410870627579 | 0.202 | 0.487 |
| 1.78828357690918e-232 | 1 VDAC1 Naive 1    |       |       |
| 4.01452626138684e-236 | -0.533444978244973 | 0.01  | 0.149 |
| 7.1574988714266e-232  | 1 CYTOR Naive 1    |       |       |
| 6.68160262008308e-236 | -0.472477409301528 | 0.006 | 0.13  |
| 1.19126293113461e-231 | 1 PYCR1 Naive 1    |       |       |
| 3.96352758556341e-235 | -0.51661031650591  | 0.209 | 0.491 |
| 7.06657333230101e-231 | 1 COX17 Naive 1    |       |       |
| 8.009222804382e-235   | -0.387866323733597 | 0.401 | 0.688 |
| 1.42796433379327e-230 | 1 ATP5F1A Naive 1  |       |       |
| 1.30721402496336e-234 | -0.339448392699118 | 0.764 | 0.923 |
| 2.33063188510718e-230 | 1 SRP14 Naive 1    |       |       |
| 2.39628706486293e-234 | -0.591773278044618 | 0.014 | 0.153 |
| 4.27234020794411e-230 | 1 PSAT1 Naive 1    |       |       |
| 2.18555342607371e-232 | -0.554783793381902 | 0.181 | 0.451 |
| 3.89662320334681e-228 | 1 CTSH Naive 1     |       |       |

|                       |                    |       |       |
|-----------------------|--------------------|-------|-------|
| 5.64287618330758e-232 | -0.552084403558824 | 0.065 | 0.276 |
| 1.00606839472191e-227 | 1 GARS Naive 1     |       |       |
| 3.01507468881447e-231 | -0.45744281007142  | 0.311 | 0.6   |
| 5.37557666268732e-227 | 1 SNRPB Naive 1    |       |       |
| 1.55146436951723e-230 | -0.688182046653927 | 0.064 | 0.258 |
| 2.76610582441227e-226 | 1 UBE2J1 Naive 1   |       |       |
| 4.27869982928319e-230 | -0.482690263825186 | 0.192 | 0.469 |
| 7.62849392562899e-226 | 1 ROM01 Naive 1    |       |       |
| 4.44692385711256e-230 | -0.470152716304852 | 0.14  | 0.407 |
| 7.92842054484599e-226 | 1 PSMC3 Naive 1    |       |       |
| 1.78887199374239e-229 | -0.500148424145577 | 0.395 | 0.665 |
| 3.18937987764331e-225 | 1 GSTP1 Naive 1    |       |       |
| 2.73644981013118e-228 | -0.508332793012413 | 0.076 | 0.304 |
| 4.87881636648289e-224 | 1 ATOX1 Naive 1    |       |       |
| 2.78450758243095e-228 | -0.553086601259479 | 0.309 | 0.586 |
| 4.96449856871613e-224 | 1 TCEA1 Naive 1    |       |       |
| 1.17434300444088e-227 | 0.439640102462439  | 0.915 | 0.848 |
| 2.09373614261765e-223 | 1 CD79B Naive 1    |       |       |
| 8.10637718678663e-227 | -0.480933811514854 | 0.186 | 0.461 |
| 1.44528598863219e-222 | 1 CCT4 Naive 1     |       |       |
| 2.59326702947207e-226 | -0.507299639473106 | 0.031 | 0.204 |
| 4.62353578684575e-222 | 1 TUBA1C Naive 1   |       |       |
| 6.5275527798863e-226  | -0.379385485626208 | 0.405 | 0.692 |
| 1.16379738512593e-221 | 1 RBX1 Naive 1     |       |       |
| 4.48892944590691e-225 | -0.491669306518367 | 0.189 | 0.464 |
| 8.00331230910742e-221 | 1 SLIRP Naive 1    |       |       |
| 2.96230501567415e-224 | -0.477590127876761 | 0.257 | 0.545 |
| 5.28149361244545e-220 | 1 TALD01 Naive 1   |       |       |
| 6.66746464558385e-224 | -0.457185317483892 | 0.162 | 0.432 |
| 1.18874227166115e-219 | 1 PSMA3 Naive 1    |       |       |
| 1.07677967551637e-223 | -0.430274937243585 | 0.33  | 0.621 |
| 1.91979048347814e-219 | 1 EIF2S2 Naive 1   |       |       |
| 3.71664630964888e-223 | -0.683105609795668 | 0.036 | 0.212 |
| 6.62640870547298e-219 | 1 DAAM1 Naive 1    |       |       |
| 5.48702006202948e-223 | 0.822255791183614  | 0.543 | 0.456 |
| 9.78280806859237e-219 | 1 ITM2B Naive 1    |       |       |
| 6.54871770515755e-223 | -0.931526669130196 | 0.51  | 0.744 |
| 1.16757087965254e-218 | 1 HMG2 Naive 1     |       |       |
| 9.77207218865914e-223 | -0.4317805785576   | 0.198 | 0.48  |
| 1.74226275051604e-218 | 1 PSMB7 Naive 1    |       |       |
| 1.18584341174097e-221 | -0.569017528955873 | 0.053 | 0.243 |
| 2.11424021879298e-217 | 1 TRAF4 Naive 1    |       |       |
| 4.02904841462758e-221 | -0.707643379591699 | 0.026 | 0.177 |
| 7.18339041843951e-217 | 1 LMNA Naive 1     |       |       |
| 4.1890041023563e-221  | -0.457171154976487 | 0.153 | 0.42  |
| 7.46857541409106e-217 | 1 NDUFS6 Naive 1   |       |       |
| 1.50659145210619e-220 | -0.466790103382543 | 0.229 | 0.51  |
| 2.68610189996013e-216 | 1 PRELID1 Naive 1  |       |       |
| 2.8693420376223e-220  | -0.428211816754384 | 0.372 | 0.655 |
| 5.1157499188768e-216  | 1 ACTR3 Naive 1    |       |       |



|                       |                    |       |       |
|-----------------------|--------------------|-------|-------|
| 1.21606832093727e-219 | -0.561202523330437 | 0.174 | 0.433 |
| 2.16812820939907e-215 | 1 RPL22L1 Naive 1  |       |       |
| 1.62054518649326e-219 | -0.705049404339786 | 0.033 | 0.191 |
| 2.88927001299884e-215 | 1 TNFRSF18 Naive 1 |       |       |
| 5.10458653611931e-219 | -0.636662065345184 | 0.074 | 0.281 |
| 9.10096733524712e-215 | 1 SRGN Naive 1     |       |       |
| 6.68641384115676e-217 | -0.452378590487615 | 0.162 | 0.432 |
| 1.19212072373984e-212 | 1 NDUFS5 Naive 1   |       |       |
| 2.15746940623377e-216 | -0.503930064164707 | 0.022 | 0.169 |
| 3.84655220437419e-212 | 1 CLECL1 Naive 1   |       |       |
| 5.60623389801432e-216 | -0.507891662990762 | 0.009 | 0.134 |
| 9.99535441676973e-212 | 1 CD38 Naive 1     |       |       |
| 8.61921780276023e-216 | -0.410056300462404 | 0.195 | 0.474 |
| 1.53672034205412e-211 | 1 AURKAIP1 Naive 1 |       |       |
| 3.5772485074995e-215  | -0.555439288110872 | 0.843 | 0.946 |
| 6.37787636402087e-211 | 1 SERF2 Naive 1    |       |       |
| 3.25497177283718e-213 | -0.536036996563282 | 0.083 | 0.297 |
| 5.8032891737914e-209  | 1 SMS Naive 1      |       |       |
| 5.08772212871774e-213 | -0.610716583358992 | 0.059 | 0.254 |
| 9.07089978329087e-209 | 1 CKS2 Naive 1     |       |       |
| 1.17436806511329e-212 | 0.811669326894626  | 0.365 | 0.237 |
| 2.09378082329048e-208 | 1 FCMR Naive 1     |       |       |
| 2.57702753363837e-211 | 0.827634898609569  | 0.421 | 0.319 |
| 4.59458238972385e-207 | 1 RIPOR2 Naive 1   |       |       |
| 4.20947339187945e-211 | -0.365041942732791 | 0.434 | 0.708 |
| 7.50507011038187e-207 | 1 ATP5ME Naive 1   |       |       |
| 4.41105302169422e-211 | -0.409081802674598 | 0.276 | 0.558 |
| 7.86446643237862e-207 | 1 FKBP1A Naive 1   |       |       |
| 1.11117132432755e-210 | -0.43450863568135  | 0.204 | 0.479 |
| 1.9811073541436e-206  | 1 PGAM1 Naive 1    |       |       |
| 3.29713207226125e-210 | -0.540117243991999 | 0.275 | 0.545 |
| 5.87845677163458e-206 | 1 PA2G4 Naive 1    |       |       |
| 3.21018571474024e-209 | -0.48095609094855  | 0.187 | 0.449 |
| 5.72344011081037e-205 | 1 DDX39A Naive 1   |       |       |
| 6.19069671059036e-209 | -0.409630860671442 | 0.248 | 0.532 |
| 1.10373931653116e-204 | 1 TUFM Naive 1     |       |       |
| 3.5227362018433e-208  | -0.994331138917261 | 0.041 | 0.201 |
| 6.28068637426641e-204 | 1 XBP1 Naive 1     |       |       |
| 6.47136678333365e-208 | -0.499111843677601 | 0.017 | 0.157 |
| 1.15377998380056e-203 | 1 AIM2 Naive 1     |       |       |
| 2.02179687837409e-206 | -0.418311889251417 | 0.207 | 0.479 |
| 3.60466165445317e-202 | 1 ATP5F1C Naive 1  |       |       |
| 3.013403578376e-206   | -0.509017218635785 | 0.17  | 0.423 |
| 5.37259723988657e-202 | 1 FNBP1 Naive 1    |       |       |
| 7.41276109035857e-206 | -0.450531920625036 | 0.229 | 0.502 |
| 1.32162117480003e-201 | 1 SNRPF Naive 1    |       |       |
| 3.4578212429469e-205  | -0.382889891254022 | 0.271 | 0.558 |
| 6.16494949405002e-201 | 1 NDUFB8 Naive 1   |       |       |
| 1.07593548274293e-204 | -0.451673305091768 | 0.101 | 0.334 |
| 1.91828537218237e-200 | 1 TIMM8B Naive 1   |       |       |

|                       |                    |       |       |
|-----------------------|--------------------|-------|-------|
| 1.45614896524027e-203 | -0.413928550879083 | 0.249 | 0.523 |
| 2.59616799012687e-199 | 1 CCT8 Naive 1     |       |       |
| 1.61036182904055e-203 | -0.505723981631233 | 0.031 | 0.188 |
| 2.87111410499639e-199 | 1 CCDC88A Naive 1  |       |       |
| 3.48629630860503e-203 | -0.344517630712828 | 0.408 | 0.687 |
| 6.2157176886119e-199  | 1 UBE2D3 Naive 1   |       |       |
| 3.14149019821713e-202 | -0.43312220003266  | 0.192 | 0.46  |
| 5.60096287440133e-198 | 1 MINOS1 Naive 1   |       |       |
| 6.20830095219544e-201 | -0.456442396741566 | 0.306 | 0.573 |
| 1.10687797676693e-196 | 1 PARP1 Naive 1    |       |       |
| 1.27354816841203e-200 | -0.416476750637878 | 0.013 | 0.141 |
| 2.27060902946181e-196 | 1 SLC1A5 Naive 1   |       |       |
| 1.42666700430107e-198 | -0.448110085205993 | 0.164 | 0.422 |
| 2.54360460196837e-194 | 1 ARPC5L Naive 1   |       |       |
| 4.58443408723358e-198 | -0.425166092302583 | 0.131 | 0.379 |
| 8.17358753412875e-194 | 1 CYC1 Naive 1     |       |       |
| 5.07593672565317e-198 | -0.408890828736916 | 0.378 | 0.649 |
| 9.04988758816704e-194 | 1 SERBP1 Naive 1   |       |       |
| 8.64168268129452e-198 | -0.448996210408154 | 0.201 | 0.467 |
| 1.540725605248e-193   | 1 EIF5B Naive 1    |       |       |
| 2.29312163106561e-197 | -0.427950714012992 | 0.221 | 0.49  |
| 4.08840655602688e-193 | 1 SFPQ Naive 1     |       |       |
| 3.17753044637152e-197 | -0.47880204120558  | 0.14  | 0.378 |
| 5.66521903283578e-193 | 1 PDIA6 Naive 1    |       |       |
| 1.2875379540447e-196  | -0.44373418855483  | 0.128 | 0.367 |
| 2.29555141826629e-192 | 1 MIF Naive 1      |       |       |
| 1.36696315077098e-196 | -0.42666234496103  | 0.132 | 0.376 |
| 2.43715860150958e-192 | 1 LSM6 Naive 1     |       |       |
| 2.37441460433092e-196 | -0.477012100094022 | 0.111 | 0.341 |
| 4.2333437980616e-192  | 1 LPXN Naive 1     |       |       |
| 3.48882419714399e-196 | -0.36526312703648  | 0.335 | 0.619 |
| 6.22022466108802e-192 | 1 NDUFB2 Naive 1   |       |       |
| 6.76716639681715e-196 | -0.340516345380455 | 0.617 | 0.834 |
| 1.20651809688853e-191 | 1 TMA7 Naive 1     |       |       |
| 2.47558295653977e-195 | -0.434875855101089 | 0.221 | 0.489 |
| 4.41371685321475e-191 | 1 LSM5 Naive 1     |       |       |
| 3.32568451950751e-195 | -0.409695413439605 | 0.173 | 0.434 |
| 5.92936292982995e-191 | 1 MDH2 Naive 1     |       |       |
| 3.60095923474356e-195 | -0.360089671330569 | 0.337 | 0.612 |
| 6.42015021962429e-191 | 1 COPE Naive 1     |       |       |
| 2.41375107854083e-194 | -0.413919855417835 | 0.147 | 0.397 |
| 4.30347679793045e-190 | 1 PSMA5 Naive 1    |       |       |
| 3.66619360567029e-194 | -0.395291242769031 | 0.244 | 0.518 |
| 6.53645657954956e-190 | 1 UBE2L3 Naive 1   |       |       |
| 5.75909813321987e-194 | -0.385203219492486 | 0.411 | 0.677 |
| 1.02678960617177e-189 | 1 HNRNPC Naive 1   |       |       |
| 8.20043218074698e-194 | -0.422724420153617 | 0.179 | 0.439 |
| 1.46205505350538e-189 | 1 BANF1 Naive 1    |       |       |
| 1.66584357546426e-193 | -0.382759516892935 | 0.287 | 0.565 |
| 2.97003251069524e-189 | 1 GHITM Naive 1    |       |       |

|                       |                        |       |       |
|-----------------------|------------------------|-------|-------|
| 2.44172438029512e-193 | -0.478809495834194     | 0.048 | 0.223 |
| 4.35335039762816e-189 | 1 NPM3 Naive 1         |       |       |
| 1.31241690497193e-191 | -0.574479462326155     | 0.123 | 0.346 |
| 2.33990809987445e-187 | 1 SEC11C Naive 1       |       |       |
| 7.53572546027383e-191 | -0.422088027427189     | 0.104 | 0.331 |
| 1.34354449231222e-186 | 1 GLRX3 Naive 1        |       |       |
| 1.0342167426315e-190  | -0.358193700856646     | 0.395 | 0.669 |
| 1.8439050304377e-186  | 1 UQCRH Naive 1        |       |       |
| 1.73058807366521e-190 | -0.435949827819593     | 0.054 | 0.24  |
| 3.0854654765377e-186  | 1 MRPL12 Naive 1       |       |       |
| 4.66656781790296e-190 | -0.44217797073224      | 0.061 | 0.252 |
| 8.32002376253919e-186 | 1 MRPL3 Naive 1        |       |       |
| 1.33610190365943e-189 | -0.367724147963482     | 0.371 | 0.644 |
| 2.3821360840344e-185  | 1 PTGES3 Naive 1       |       |       |
| 2.30955053360434e-189 | -0.426977687110957     | 0.115 | 0.344 |
| 4.11769764636318e-185 | 1 TCP1 Naive 1         |       |       |
| 2.34475156117696e-189 | -0.52609520834484      | 0.134 | 0.358 |
| 4.1804575584224e-185  | 1 GRHPR Naive 1        |       |       |
| 2.83640916610069e-189 | -0.376207272974803     | 0.773 | 0.912 |
| 5.05703390224092e-185 | 1 PPIA Naive 1         |       |       |
| 1.03270367298146e-188 | 0.32093099515773 0.988 | 0.979 |       |
| 1.84120737855864e-184 | 1 MT-C01 Naive 1       |       |       |
| 1.7689049283736e-188  | -0.406060756595672     | 0.149 | 0.397 |
| 3.1537805967973e-184  | 1 EWSR1 Naive 1        |       |       |
| 7.21230956449821e-188 | -0.434794245086222     | 0.376 | 0.643 |
| 1.28588267225439e-183 | 1 SYNGR2 Naive 1       |       |       |
| 8.82682181716735e-188 | -0.351647711818939     | 0.357 | 0.629 |
| 1.57373406178277e-183 | 1 XRCC6 Naive 1        |       |       |
| 5.98561032069055e-187 | -0.468581700171385     | 0.042 | 0.208 |
| 1.06717446407592e-182 | 1 GPATCH4 Naive 1      |       |       |
| 9.66411656175485e-187 | -0.401264457362442     | 0.152 | 0.401 |
| 1.72301534179527e-182 | 1 PSMD7 Naive 1        |       |       |
| 1.04675665878405e-186 | -0.398212936002641     | 0.335 | 0.608 |
| 1.86626244694609e-182 | 1 APRT Naive 1         |       |       |
| 5.07284625096772e-184 | -0.31989890810648      | 0.783 | 0.922 |
| 9.04437758085034e-180 | 1 ATP5F1E Naive 1      |       |       |
| 6.45138868201689e-184 | -0.352473448769626     | 0.456 | 0.708 |
| 1.15021808811679e-179 | 1 HNRNPA3 Naive 1      |       |       |
| 1.19547498828376e-183 | 0.73405423029174 0.552 | 0.486 |       |
| 2.13141235661111e-179 | 1 FXD5 Naive 1         |       |       |
| 2.09122424417473e-183 | -0.361418676195812     | 0.218 | 0.484 |
| 3.72844370493913e-179 | 1 VCP Naive 1          |       |       |
| 9.28395543269239e-183 | -0.310623244261365     | 0.485 | 0.738 |
| 1.65523641409473e-178 | 1 COX7A2 Naive 1       |       |       |
| 9.31973191190584e-183 | -0.504613713849471     | 0.171 | 0.403 |
| 1.66161500257369e-178 | 1 ACADM Naive 1        |       |       |
| 5.96387442581589e-182 | -0.490096284087711     | 0.061 | 0.24  |
| 1.06329917137871e-177 | 1 NANS Naive 1         |       |       |
| 5.01907218226114e-181 | 0.78891801810665 0.289 | 0.194 |       |
| 8.94850379375339e-177 | 1 PRKCB Naive 1        |       |       |

|                       |                    |       |       |
|-----------------------|--------------------|-------|-------|
| 1.85775347398456e-180 | 0.744556368040643  | 0.299 | 0.194 |
| 3.31218866876706e-176 | 1 C16orf74 Naive 1 |       |       |
| 1.76165919802694e-179 | -0.39381117714846  | 0.197 | 0.45  |
| 3.14086218416223e-175 | 1 HNRNPD Naive 1   |       |       |
| 1.9252373708045e-179  | -0.428429351359168 | 0.036 | 0.191 |
| 3.43250570840734e-175 | 1 ASNS Naive 1     |       |       |
| 3.47164825877879e-179 | -0.39733973912281  | 0.125 | 0.36  |
| 6.18960168057671e-175 | 1 PDAP1 Naive 1    |       |       |
| 1.338697707799e-178   | 0.737175305994956  | 0.516 | 0.438 |
| 2.38676414323484e-174 | 1 PNRC1 Naive 1    |       |       |
| 2.81764539846441e-178 | -0.396401490114951 | 0.095 | 0.313 |
| 5.02357998092219e-174 | 1 MRPS15 Naive 1   |       |       |
| 1.09365065814138e-177 | -0.39347710440525  | 0.247 | 0.512 |
| 1.94986975840028e-173 | 1 RSL1D1 Naive 1   |       |       |
| 6.55681480634578e-177 | -0.407924395771653 | 0.092 | 0.304 |
| 1.16901451182339e-172 | 1 PHPT1 Naive 1    |       |       |
| 1.84559956188937e-176 | -0.395562627453841 | 0.114 | 0.341 |
| 3.29051945889255e-172 | 1 STOML2 Naive 1   |       |       |
| 2.55816184925212e-176 | -0.363224967211083 | 0.215 | 0.476 |
| 4.56094676103161e-172 | 1 CCT7 Naive 1     |       |       |
| 7.74600251533785e-176 | -0.414375859545349 | 0.097 | 0.31  |
| 1.38103478845958e-171 | 1 PRDX3 Naive 1    |       |       |
| 9.13759098203598e-176 | 0.462876357566367  | 0.767 | 0.64  |
| 1.6291410961872e-171  | 1 TCL1A Naive 1    |       |       |
| 1.02148063132193e-175 | -0.494937287960488 | 0.204 | 0.447 |
| 1.82119781758387e-171 | 1 METAP2 Naive 1   |       |       |
| 2.98971962855134e-175 | -0.416019838921604 | 0.086 | 0.289 |
| 5.33037112574418e-171 | 1 SYNCRIP Naive 1  |       |       |
| 5.90986958493202e-175 | -0.315386892729363 | 0.495 | 0.75  |
| 1.05367064829753e-170 | 1 ATP5MC2 Naive 1  |       |       |
| 4.8012879870096e-174  | -0.367179412510571 | 0.283 | 0.55  |
| 8.56021635203942e-170 | 1 COX8A Naive 1    |       |       |
| 6.34436858814115e-174 | -0.395690159581323 | 0.122 | 0.351 |
| 1.13113747557968e-169 | 1 HSBP1 Naive 1    |       |       |
| 7.90145362323332e-174 | -0.306562931905062 | 0.381 | 0.653 |
| 1.40875016648627e-169 | 1 NDUFA1 Naive 1   |       |       |
| 1.06549553413208e-173 | -0.441592235446494 | 0.111 | 0.328 |
| 1.89967198780408e-169 | 1 NOP58 Naive 1    |       |       |
| 1.74519555508908e-173 | -0.330443914198077 | 0.281 | 0.55  |
| 3.11150915516832e-169 | 1 ATP5PB Naive 1   |       |       |
| 2.30321911363823e-173 | -0.337859744733713 | 0.202 | 0.466 |
| 4.1064093577056e-169  | 1 NDUFB7 Naive 1   |       |       |
| 8.85121359641656e-173 | -0.411335767500783 | 0.093 | 0.3   |
| 1.57808287210511e-168 | 1 NDUFAF8 Naive 1  |       |       |
| 6.13327734859679e-172 | -0.403170824196042 | 0.153 | 0.389 |
| 1.09350201848132e-167 | 1 TKT Naive 1      |       |       |
| 1.55878917719561e-171 | -0.35800660931937  | 0.22  | 0.482 |
| 2.77916522402206e-167 | 1 NDUFB9 Naive 1   |       |       |
| 4.19172990059116e-171 | -0.428091640912635 | 0.135 | 0.363 |
| 7.47343523976399e-167 | 1 VOPP1 Naive 1    |       |       |

|                       |                        |       |       |
|-----------------------|------------------------|-------|-------|
| 4.59479159977743e-171 | -0.437906314723423     | 0.247 | 0.499 |
| 8.19205394324317e-167 | 1 CYCS Naive 1         |       |       |
| 5.72310072597822e-171 | -0.384332851530898     | 0.034 | 0.186 |
| 1.02037162843466e-166 | 1 CCDC167 Naive 1      |       |       |
| 7.62947370441526e-170 | -0.4975951850157 0.227 | 0.467 |       |
| 1.3602588667602e-165  | 1 COTL1 Naive 1        |       |       |
| 9.3160594675839e-170  | -0.442708628319899     | 0.114 | 0.328 |
| 1.66096024247553e-165 | 1 ATP1B3 Naive 1       |       |       |
| 2.00268829496664e-169 | -0.365514078787815     | 0.129 | 0.359 |
| 3.57059296109601e-165 | 1 PSMD2 Naive 1        |       |       |
| 4.4816474782219e-169  | -0.620875855468043     | 0.107 | 0.3   |
| 7.99032928892183e-165 | 1 HSPA5 Naive 1        |       |       |
| 7.62670609464462e-169 | -0.367719719794794     | 0.133 | 0.366 |
| 1.35976542961419e-164 | 1 HSD17B10 Naive 1     |       |       |
| 1.06405181082273e-168 | -0.382171971477752     | 0.029 | 0.172 |
| 1.89709797351584e-164 | 1 PAICS Naive 1        |       |       |
| 1.92895476202827e-168 | -0.550139344413344     | 0.159 | 0.38  |
| 3.4391334452202e-164  | 1 TUBB4B Naive 1       |       |       |
| 3.72439830002149e-168 | -0.325479952006554     | 0.36  | 0.628 |
| 6.64022972910832e-164 | 1 TPM3 Naive 1         |       |       |
| 4.09712585394454e-168 | -0.36249808370175      | 0.303 | 0.566 |
| 7.30476568499773e-164 | 1 SOD1 Naive 1         |       |       |
| 5.24563150840843e-168 | -0.39201155802703      | 0.033 | 0.18  |
| 9.35243641634139e-164 | 1 PPP1R14B Naive 1     |       |       |
| 1.72374477869665e-167 | -0.397642228367876     | 0.28  | 0.539 |
| 3.07326456593826e-163 | 1 MZT2B Naive 1        |       |       |
| 2.06057456039436e-167 | -0.360638022304218     | 0.168 | 0.416 |
| 3.6737983837271e-163  | 1 SNRPC Naive 1        |       |       |
| 4.95433523140896e-166 | -0.38254770781944      | 0.135 | 0.366 |
| 8.83308428407903e-162 | 1 BUD31 Naive 1        |       |       |
| 5.5040154695168e-166  | -0.418302390267335     | 0.051 | 0.219 |
| 9.8131091806015e-162  | 1 EBNA1BP2 Naive 1     |       |       |
| 1.78447021510511e-165 | -0.376541997639125     | 0.146 | 0.382 |
| 3.1815319465109e-161  | 1 PHB2 Naive 1         |       |       |
| 2.01284598916402e-165 | -0.382169442989964     | 0.21  | 0.459 |
| 3.58870311408052e-161 | 1 DNAJA1 Naive 1       |       |       |
| 3.80301834752711e-165 | -0.323118698552872     | 0.268 | 0.534 |
| 6.78040141180608e-161 | 1 RTRAF Naive 1        |       |       |
| 2.06884526256145e-164 | -0.672773637650149     | 0.275 | 0.499 |
| 3.6885442186208e-160  | 1 CD83 Naive 1         |       |       |
| 3.94614401396576e-164 | -0.423875450777966     | 0.16  | 0.39  |
| 7.03558016249956e-160 | 1 HSPA9 Naive 1        |       |       |
| 7.27524381236582e-164 | -0.386040866499861     | 0.06  | 0.239 |
| 1.2971032193067e-159  | 1 PSMD1 Naive 1        |       |       |
| 8.32962688585696e-163 | -0.379681835857176     | 0.336 | 0.587 |
| 1.48508917747944e-158 | 1 ATP5IF1 Naive 1      |       |       |
| 8.89325147544768e-163 | -0.360640404900212     | 0.01  | 0.114 |
| 1.58557780555757e-158 | 1 MYBL2 Naive 1        |       |       |
| 3.10946027367912e-162 | -0.370985461141846     | 0.114 | 0.331 |
| 5.5438567219425e-158  | 1 PSMD11 Naive 1       |       |       |

|                       |                        |         |       |
|-----------------------|------------------------|---------|-------|
| 6.05583751164026e-162 | -0.461623825375693     | 0.04    | 0.186 |
| 1.07969526995034e-157 | 1 SAMSN1 Naive 1       |         |       |
| 7.2874412581893e-162  | -0.52768273071319      | 0.141   | 0.352 |
| 1.29927790192257e-157 | 1 SLC3A2 Naive 1       |         |       |
| 1.3860644865892e-161  | -0.383373666493741     | 0.108   | 0.319 |
| 2.47121437313989e-157 | 1 SSRP1 Naive 1        |         |       |
| 3.19306554147319e-161 | -0.399277137694426     | 0.118   | 0.333 |
| 5.69291655389255e-157 | 1 FERMT3 Naive 1       |         |       |
| 6.55838645326218e-161 | -0.320751020155116     | 0.341   | 0.603 |
| 1.16929472075211e-156 | 1 RBM8A Naive 1        |         |       |
| 2.06178520055355e-160 | -0.3855327434828 0.084 | 0.282   |       |
| 3.67595683406693e-156 | 1 CDV3 Naive 1         |         |       |
| 3.32833203771496e-160 | -0.33949043138731      | 0.173   | 0.418 |
| 5.934083190042e-156   | 1 MRPL20 Naive 1       |         |       |
| 4.87539107975431e-160 | -0.403080004774764     | 0.073   | 0.256 |
| 8.69233475609396e-156 | 1 CDK4 Naive 1         |         |       |
| 4.98928693418408e-160 | -0.430562791946683     | 0.06    | 0.231 |
| 8.8953996749568e-156  | 1 C19orf48 Naive 1     |         |       |
| 5.17514467735133e-160 | -0.331986080311696     | 0.233   | 0.492 |
| 9.22676544524968e-156 | 1 GADD45GIP1           | Naive 1 |       |
| 1.26635239381363e-159 | -0.432234541468091     | 0.062   | 0.23  |
| 2.25777968293032e-155 | 1 CFLAR Naive 1        |         |       |
| 1.71700300615739e-159 | 0.660635351635633      | 0.189   | 0.094 |
| 3.06124465967802e-155 | 1 C1orf162 Naive 1     |         |       |
| 3.28396932687091e-159 | -0.349765709720519     | 0.161   | 0.396 |
| 5.85498891287815e-155 | 1 CACYBP Naive 1       |         |       |
| 8.18337823060948e-159 | -0.384451363655745     | 0.159   | 0.392 |
| 1.45901450473536e-154 | 1 EIF3J Naive 1        |         |       |
| 8.55511286889998e-159 | -0.334898221570421     | 0.382   | 0.642 |
| 1.52529107339618e-154 | 1 RSL24D1 Naive 1      |         |       |
| 9.57621973340456e-159 | -0.354554788173271     | 0.064   | 0.245 |
| 1.7073442162687e-154  | 1 PSMB5 Naive 1        |         |       |
| 1.42348357718414e-158 | -0.396037441595452     | 0.067   | 0.245 |
| 2.5379288697616e-154  | 1 HSPH1 Naive 1        |         |       |
| 2.27638882888847e-158 | -0.320605588841421     | 0.25    | 0.509 |
| 4.05857364302525e-154 | 1 UBE2N Naive 1        |         |       |
| 3.42852980270489e-158 | -0.580684911194604     | 0.094   | 0.27  |
| 6.11272578524254e-154 | 1 TNFRSF13B            | Naive 1 |       |
| 7.49871779498377e-158 | -0.346200314176249     | 0.078   | 0.273 |
| 1.33694639566766e-153 | 1 MRPL13 Naive 1       |         |       |
| 9.05918065608561e-158 | -0.472926935125882     | 0.101   | 0.292 |
| 1.6151613191735e-153  | 1 PIM1 Naive 1         |         |       |
| 1.70323316993633e-157 | -0.376198769969805     | 0.044   | 0.202 |
| 3.03669441867948e-153 | 1 ZNF593 Naive 1       |         |       |
| 2.74431772552274e-157 | -0.341077375409172     | 0.201   | 0.45  |
| 4.89284407283449e-153 | 1 TOMM22 Naive 1       |         |       |
| 4.0248907843689e-157  | -0.344645737907337     | 0.186   | 0.43  |
| 7.1759777945132e-153  | 1 ENY2 Naive 1         |         |       |
| 9.36686379910417e-157 | -0.324643340282024     | 0.01    | 0.116 |
| 1.67001814674228e-152 | 1 SEMA4A Naive 1       |         |       |

|                       |                        |       |       |
|-----------------------|------------------------|-------|-------|
| 1.31403945303576e-156 | -0.359550322798191     | 0.064 | 0.244 |
| 2.34280094081745e-152 | 1 MRPL4 Naive 1        |       |       |
| 1.69921832003979e-156 | -0.391267259860206     | 0.108 | 0.315 |
| 3.02953634279894e-152 | 1 DCTPP1 Naive 1       |       |       |
| 2.32227409355198e-156 | 0.72901108962067 0.324 | 0.233 |       |
| 4.14038248139382e-152 | 1 RASGRP2 Naive 1      |       |       |
| 3.48733242835344e-155 | -0.48960371839802      | 0.082 | 0.265 |
| 6.21756498651135e-151 | 1 KPNA2 Naive 1        |       |       |
| 1.27797814042111e-154 | -0.330927553669105     | 0.158 | 0.395 |
| 2.2785072265568e-150  | 1 POLR2E Naive 1       |       |       |
| 8.48870334439951e-154 | -0.322044213679989     | 0.952 | 0.985 |
| 1.51345091927299e-149 | 1 RPL5 Naive 1         |       |       |
| 9.26603376081598e-154 | -0.311529590895688     | 0.261 | 0.52  |
| 1.65204115921588e-149 | 1 EIF3M Naive 1        |       |       |
| 2.22566567345036e-153 | -0.344276917740458     | 0.374 | 0.625 |
| 3.96813932919465e-149 | 1 SRSF2 Naive 1        |       |       |
| 2.72074242541537e-152 | -0.311777669825005     | 0.186 | 0.432 |
| 4.85081167027306e-148 | 1 UQCRFS1 Naive 1      |       |       |
| 8.14144885256998e-152 | -0.392497254628041     | 0.056 | 0.221 |
| 1.4515389159247e-147  | 1 TOMM40 Naive 1       |       |       |
| 9.36107758810699e-152 | 0.503766545393058      | 0.823 | 0.768 |
| 1.66898652318359e-147 | 1 HLA-DPB1 Naive 1     |       |       |
| 1.61014271235898e-151 | -0.381463899491057     | 0.05  | 0.207 |
| 2.87072344186482e-147 | 1 YARS Naive 1         |       |       |
| 4.03050710183958e-151 | -0.326607992817014     | 0.215 | 0.461 |
| 7.18599111186979e-147 | 1 ZNF706 Naive 1       |       |       |
| 4.15791149462986e-151 | -0.334862659036405     | 0.17  | 0.408 |
| 7.41314040377558e-147 | 1 ANAPC11 Naive 1      |       |       |
| 4.68354870268031e-151 | -0.333785736240474     | 0.7   | 0.866 |
| 8.35029898200873e-147 | 1 HNRNPA2B1 Naive 1    |       |       |
| 2.53494899441198e-150 | -0.517652868499731     | 0.138 | 0.342 |
| 4.51956056213712e-146 | 1 DDX21 Naive 1        |       |       |
| 4.51137972825204e-150 | -0.350518889523895     | 0.028 | 0.16  |
| 8.04333891750056e-146 | 1 MDFIC Naive 1        |       |       |
| 1.48449790391582e-149 | -0.346968342604158     | 0.097 | 0.297 |
| 2.64671131289152e-145 | 1 OLA1 Naive 1         |       |       |
| 1.7944404731859e-149  | -0.378526069575174     | 0.016 | 0.13  |
| 3.19930791964314e-145 | 1 GMDS Naive 1         |       |       |
| 2.69734121512989e-149 | -0.348844460726486     | 0.117 | 0.328 |
| 4.80908965245508e-145 | 1 AHSA1 Naive 1        |       |       |
| 3.36072856521403e-149 | -0.342562206345495     | 0.089 | 0.287 |
| 5.99184295892009e-145 | 1 THOC7 Naive 1        |       |       |
| 1.73043237007109e-148 | -0.999598181036638     | 0.073 | 0.224 |
| 3.08518787259974e-144 | 1 LGALS1 Naive 1       |       |       |
| 1.7414816731621e-148  | -0.320836738243374     | 0.161 | 0.395 |
| 3.10488767508072e-144 | 1 RPS19BP1 Naive 1     |       |       |
| 5.07819375919518e-148 | -0.346239306762244     | 0.144 | 0.367 |
| 9.0539116532691e-144  | 1 STRAP Naive 1        |       |       |
| 5.62804886274552e-148 | -0.423336736827362     | 0.041 | 0.18  |
| 1.0034248317389e-143  | 1 CD58 Naive 1         |       |       |

|                       |                      |       |       |
|-----------------------|----------------------|-------|-------|
| 1.37064456793639e-147 | -0.356411584165072   | 0.04  | 0.186 |
| 2.44372220017379e-143 | 1 TFDP1 Naive 1      |       |       |
| 3.6632489196697e-146  | -0.337673709276303   | 0.207 | 0.449 |
| 6.53120649887912e-142 | 1 EIF6 Naive 1       |       |       |
| 3.74842677264396e-146 | -0.342002183860945   | 0.154 | 0.379 |
| 6.68307009294691e-142 | 1 CHMP4B Naive 1     |       |       |
| 1.2130061130556e-145  | -0.329514612446169   | 0.089 | 0.286 |
| 2.16266859896683e-141 | 1 PSMC2 Naive 1      |       |       |
| 1.79888620059144e-145 | -0.351532970386586   | 0.077 | 0.259 |
| 3.20723420703447e-141 | 1 STIP1 Naive 1      |       |       |
| 2.00780453572545e-145 | -0.358214664743386   | 0.084 | 0.27  |
| 3.5797147067449e-141  | 1 HNRNPA1P48 Naive 1 |       |       |
| 2.07224477798187e-145 | -0.360650382673148   | 0.071 | 0.247 |
| 3.69460521466387e-141 | 1 DCAF13 Naive 1     |       |       |
| 3.41999981292823e-145 | -0.323619009398896   | 0.179 | 0.415 |
| 6.09751766646974e-141 | 1 NDUFB3 Naive 1     |       |       |
| 1.30579236661e-144    | -0.374477186930859   | 0.157 | 0.372 |
| 2.32809721042898e-140 | 1 H2AFY Naive 1      |       |       |
| 1.49845595600147e-144 | -0.331609021528791   | 0.073 | 0.256 |
| 2.67159712395501e-140 | 1 MRPL27 Naive 1     |       |       |
| 1.86916558795986e-144 | -0.33968099444292    | 0.077 | 0.262 |
| 3.33253532677364e-140 | 1 MRPL15 Naive 1     |       |       |
| 4.73016112935071e-144 | 0.751932173945682    | 0.377 | 0.316 |
| 8.43340427751939e-140 | 1 AES Naive 1        |       |       |
| 4.88008814450063e-144 | -0.378923040270553   | 0.039 | 0.181 |
| 8.70070915283017e-140 | 1 MRT04 Naive 1      |       |       |
| 9.79362794745677e-144 | -0.333642023850143   | 0.071 | 0.246 |
| 1.74610592675207e-139 | 1 DAZAP1 Naive 1     |       |       |
| 3.39402487251407e-143 | -0.333341800834587   | 0.07  | 0.248 |
| 6.05120694520534e-139 | 1 TIMM17A Naive 1    |       |       |
| 4.6024822101332e-143  | 0.589028249319485    | 0.117 | 0.046 |
| 8.20576553244648e-139 | 1 KLF3 Naive 1       |       |       |
| 6.07002247945175e-143 | -0.328782703336721   | 0.185 | 0.42  |
| 1.08222430786145e-138 | 1 SSB Naive 1        |       |       |
| 1.05051038229146e-142 | -0.322735249031411   | 0.083 | 0.275 |
| 1.87295496058744e-138 | 1 MCTS1 Naive 1      |       |       |
| 1.74492379851817e-141 | -0.305535549422326   | 0.221 | 0.464 |
| 3.11102464037805e-137 | 1 LSM3 Naive 1       |       |       |
| 2.13739981738932e-141 | -0.307724256496724   | 0.203 | 0.44  |
| 3.81077013442342e-137 | 1 MDH1 Naive 1       |       |       |
| 4.25608541487304e-141 | -0.370532885309052   | 0.016 | 0.125 |
| 7.58817468617714e-137 | 1 AC023590.1 Naive 1 |       |       |
| 9.47041787991788e-141 | -0.33012235975844    | 0.096 | 0.292 |
| 1.68848080381056e-136 | 1 TXNDC17 Naive 1    |       |       |
| 1.03077646349826e-140 | -0.318686327876139   | 0.167 | 0.393 |
| 1.83777135677105e-136 | 1 VPS29 Naive 1      |       |       |
| 4.82122801731387e-140 | -0.325517294627516   | 0.101 | 0.299 |
| 8.5957674320689e-136  | 1 MRPL47 Naive 1     |       |       |
| 6.8797564237549e-140  | -0.315848785938579   | 0.148 | 0.371 |
| 1.22659177279126e-135 | 1 PSMC4 Naive 1      |       |       |



|                       |                       |       |       |
|-----------------------|-----------------------|-------|-------|
| 8.59232623026491e-140 | -0.361442059971962    | 0.189 | 0.416 |
| 1.53192584359393e-135 | 1 SHMT2 Naive 1       |       |       |
| 1.05370449401387e-139 | -0.306022330504827    | 0.181 | 0.418 |
| 1.87864974237732e-135 | 1 NOL7 Naive 1        |       |       |
| 1.09847637066519e-139 | 0.7288855456925 0.353 | 0.256 |       |
| 1.95847352125897e-135 | 1 JUN Naive 1         |       |       |
| 1.27245105274745e-139 | -0.335324537488511    | 0.212 | 0.443 |
| 2.26865298194342e-135 | 1 HDAC1 Naive 1       |       |       |
| 2.4960949650916e-139  | -0.580632894668229    | 0.013 | 0.106 |
| 4.45028771326182e-135 | 1 PCLAF Naive 1       |       |       |
| 6.45058375853871e-139 | -0.303127428620474    | 0.012 | 0.112 |
| 1.15007457830987e-134 | 1 FAM241A Naive 1     |       |       |
| 7.97631355422749e-139 | -0.587505163666506    | 0.985 | 0.99  |
| 1.42209694358322e-134 | 1 ACTB Naive 1        |       |       |
| 9.45009806738605e-139 | -0.319401564375225    | 0.131 | 0.344 |
| 1.68485798443426e-134 | 1 GTF3C6 Naive 1      |       |       |
| 1.39497183473054e-138 | -0.535358730084684    | 0.026 | 0.139 |
| 2.48709528414108e-134 | 1 LGALS3 Naive 1      |       |       |
| 2.44627929551081e-138 | -0.316939283841549    | 0.105 | 0.308 |
| 4.36147135596623e-134 | 1 MRPS7 Naive 1       |       |       |
| 6.89081278252753e-138 | -0.319445659475876    | 0.059 | 0.223 |
| 1.22856301099683e-133 | 1 MRPL23 Naive 1      |       |       |
| 1.10251501871329e-137 | -0.335691776703589    | 0.117 | 0.319 |
| 1.96567402686393e-133 | 1 ILF3 Naive 1        |       |       |
| 2.10545344980233e-137 | -0.33129335527327     | 0.144 | 0.359 |
| 3.75381295565257e-133 | 1 EIF3A Naive 1       |       |       |
| 6.69979148460443e-137 | -0.317068559076362    | 0.097 | 0.291 |
| 1.19450582379012e-132 | 1 PSMD3 Naive 1       |       |       |
| 8.08211142611608e-137 | 0.668788613085526     | 0.258 | 0.181 |
| 1.44095964616224e-132 | 1 S1PR4 Naive 1       |       |       |
| 5.90812754377101e-135 | -0.379989942188123    | 0.044 | 0.181 |
| 1.05336005977893e-130 | 1 NFKB1 Naive 1       |       |       |
| 2.72938040096263e-134 | -0.380228665746119    | 0.102 | 0.285 |
| 4.86621231687628e-130 | 1 ANP32E Naive 1      |       |       |
| 6.85845337062181e-134 | -0.303655399431946    | 0.136 | 0.351 |
| 1.22279365144816e-129 | 1 NDUFB6 Naive 1      |       |       |
| 7.53125439211165e-134 | 0.678760139957042     | 0.415 | 0.338 |
| 1.34274734556959e-129 | 1 TRAF3IP3 Naive 1    |       |       |
| 1.0518305445399e-133  | -0.437788484236361    | 0.061 | 0.211 |
| 1.87530867786018e-129 | 1 DNMT1 Naive 1       |       |       |
| 1.61859666360076e-133 | -0.375899563964323    | 0.082 | 0.252 |
| 2.88579599153379e-129 | 1 TARS Naive 1        |       |       |
| 3.08840000687959e-133 | -0.331717236540871    | 0.075 | 0.249 |
| 5.50630837226562e-129 | 1 FUBP1 Naive 1       |       |       |
| 3.40682947724331e-133 | -0.31447345145889     | 0.098 | 0.289 |
| 6.0740362749771e-129  | 1 MTCH2 Naive 1       |       |       |
| 3.41436109097378e-133 | -0.321342756589481    | 0.163 | 0.383 |
| 6.08746438909715e-129 | 1 SARS Naive 1        |       |       |
| 4.04494736547476e-133 | -0.470393371788116    | 0.029 | 0.149 |
| 7.21173665790496e-129 | 1 NEIL1 Naive 1       |       |       |

|                       |                        |       |       |
|-----------------------|------------------------|-------|-------|
| 9.59329047648431e-133 | -0.321229659992462     | 0.042 | 0.183 |
| 1.71038775905239e-128 | 1 ETF1 Naive 1         |       |       |
| 3.8982959940362e-132  | -0.480729497223344     | 0.159 | 0.36  |
| 6.95027192776714e-128 | 1 DUT Naive 1          |       |       |
| 2.32516455181025e-131 | -0.304266299283476     | 0.132 | 0.341 |
| 4.14553587942249e-127 | 1 NDUFAF3 Naive 1      |       |       |
| 2.75350295705588e-131 | -0.341758871886781     | 0.12  | 0.321 |
| 4.90922042213493e-127 | 1 PDCD5 Naive 1        |       |       |
| 8.5345196307397e-131  | -0.35297461454106      | 0.139 | 0.344 |
| 1.52161950496458e-126 | 1 PRDX2 Naive 1        |       |       |
| 1.09192144544251e-130 | -0.317497954839706     | 0.045 | 0.189 |
| 1.94678674507945e-126 | 1 RARS Naive 1         |       |       |
| 1.16319441588986e-130 | -0.315862445297323     | 0.174 | 0.392 |
| 2.07385932409003e-126 | 1 RBBP7 Naive 1        |       |       |
| 1.27491093870114e-130 | -0.333065583874871     | 0.139 | 0.347 |
| 2.27303871261026e-126 | 1 NAA38 Naive 1        |       |       |
| 1.3899213426657e-130  | -0.4879836730266 0.021 | 0.121 |       |
| 2.47809076183868e-126 | 1 VPRESB3 Naive 1      |       |       |
| 1.62979363622497e-130 | -0.484300029964902     | 0.07  | 0.22  |
| 2.9057590740255e-126  | 1 HMCES Naive 1        |       |       |
| 3.05117026929257e-130 | -0.337281131127872     | 0.051 | 0.202 |
| 5.43993147312171e-126 | 1 BID Naive 1          |       |       |
| 4.50617474759938e-130 | -0.335241999861046     | 0.038 | 0.173 |
| 8.03405895749493e-126 | 1 GAR1 Naive 1         |       |       |
| 2.51506091850412e-129 | -0.382255014494846     | 0.109 | 0.297 |
| 4.484102111601e-125   | 1 POU2AF1 Naive 1      |       |       |
| 3.61865175961579e-129 | -0.36150808510729      | 0.116 | 0.301 |
| 6.451694222219e-125   | 1 WARS Naive 1         |       |       |
| 5.06880097910505e-129 | -0.336350619114244     | 0.062 | 0.215 |
| 9.0371652656464e-125  | 1 ATIC Naive 1         |       |       |
| 2.71293833255855e-128 | 0.611314751006094      | 0.57  | 0.504 |
| 4.83689775311864e-124 | 1 BANK1 Naive 1        |       |       |
| 5.10738397331037e-128 | -0.302118919229471     | 0.185 | 0.411 |
| 9.10595488601506e-124 | 1 C19orf70 Naive 1     |       |       |
| 8.60350619060239e-128 | -0.348173165049212     | 0.036 | 0.161 |
| 1.5339191187225e-123  | 1 PRDX4 Naive 1        |       |       |
| 9.11125356177922e-128 | -0.357061139105706     | 0.038 | 0.167 |
| 1.62444539752962e-123 | 1 PPAN Naive 1         |       |       |
| 2.61041808250843e-127 | -0.540388707742722     | 0.098 | 0.261 |
| 4.65411439930428e-123 | 1 RGS1 Naive 1         |       |       |
| 2.85483099433867e-127 | -0.391069118083798     | 0.115 | 0.304 |
| 5.08987817980641e-123 | 1 JPT1 Naive 1         |       |       |
| 4.26089557841687e-127 | -0.327594189890042     | 0.038 | 0.168 |
| 7.59675072675943e-123 | 1 PEA15 Naive 1        |       |       |
| 8.07761696652225e-127 | -0.317098686667353     | 0.082 | 0.257 |
| 1.44015832896125e-122 | 1 EIF2S1 Naive 1       |       |       |
| 8.46553081987218e-127 | -0.355652968671758     | 0.136 | 0.334 |
| 1.50931948987501e-122 | 1 CALM3 Naive 1        |       |       |
| 2.63843685811982e-125 | -0.342935939864736     | 0.087 | 0.259 |
| 4.70406907434183e-121 | 1 HNRNPAB Naive 1      |       |       |

|                       |                       |       |       |
|-----------------------|-----------------------|-------|-------|
| 3.2671604332742e-125  | -1.24277044581502     | 0.064 | 0.191 |
| 5.82502033648458e-121 | 1 MZB1 Naive 1        |       |       |
| 4.60442313237661e-125 | -0.459504701628229    | 0.182 | 0.384 |
| 8.20922600271426e-121 | 1 H2AFV Naive 1       |       |       |
| 8.86201346221391e-125 | -2.98804828335161     | 0.289 | 0.473 |
| 1.58000838017812e-120 | 1 IGHG3 Naive 1       |       |       |
| 3.99321760868095e-124 | -1.40543155010548     | 0.088 | 0.234 |
| 7.11950767451727e-120 | 1 IGHG1 Naive 1       |       |       |
| 5.56876923875506e-124 | -0.347708085473588    | 0.076 | 0.245 |
| 9.9285586757764e-120  | 1 SIAH2 Naive 1       |       |       |
| 6.94836994952109e-123 | -0.404110937215415    | 0.045 | 0.177 |
| 1.23882487830011e-118 | 1 SUSD3 Naive 1       |       |       |
| 8.27014078813195e-122 | -0.586587315724537    | 0.153 | 0.334 |
| 1.47448340111604e-117 | 1 HSP90B1 Naive 1     |       |       |
| 1.20169082150106e-121 | -0.330557175361678    | 0.069 | 0.227 |
| 2.14249456565424e-117 | 1 GNL3 Naive 1        |       |       |
| 1.8170881661309e-121  | -0.373870963963745    | 0.079 | 0.236 |
| 3.23968649139478e-117 | 1 NFKBIE Naive 1      |       |       |
| 6.15144520331458e-121 | -0.31522823651313     | 0.165 | 0.377 |
| 1.09674116529896e-116 | 1 MRPS6 Naive 1       |       |       |
| 7.89590812860781e-121 | -0.341651146201268    | 0.067 | 0.223 |
| 1.40776146024949e-116 | 1 UBALD2 Naive 1      |       |       |
| 1.24433293830805e-120 | -0.349176415664184    | 0.035 | 0.157 |
| 2.21852119570942e-116 | 1 NOP16 Naive 1       |       |       |
| 1.37168092744356e-120 | -0.351776750402108    | 0.058 | 0.203 |
| 2.44556992553913e-116 | 1 WDR43 Naive 1       |       |       |
| 2.02578617642775e-120 | -0.363516081643228    | 0.22  | 0.434 |
| 3.61177417395303e-116 | 1 PPIB Naive 1        |       |       |
| 1.03873944293742e-119 | -0.302005823670753    | 0.072 | 0.233 |
| 1.85196855281312e-115 | 1 EPRS Naive 1        |       |       |
| 1.34835573241938e-119 | -0.314372324281288    | 0.098 | 0.278 |
| 2.40398343533051e-115 | 1 GSPT1 Naive 1       |       |       |
| 2.24165043049589e-118 | -0.404296684589033    | 0.155 | 0.353 |
| 3.99663855253112e-114 | 1 HNRNPH1 Naive 1     |       |       |
| 3.2507161514935e-118  | -0.357387932814039    | 0.116 | 0.3   |
| 5.79570182649776e-114 | 1 GADD45B Naive 1     |       |       |
| 1.59925943846704e-117 | -0.307817803333071    | 0.076 | 0.238 |
| 2.85131965284289e-113 | 1 WDR46 Naive 1       |       |       |
| 1.64451853599266e-117 | -0.321046703612397    | 0.168 | 0.378 |
| 2.93201209782131e-113 | 1 ANXA5 Naive 1       |       |       |
| 7.13627254221766e-117 | -0.316097449374654    | 0.086 | 0.257 |
| 1.27232603155199e-112 | 1 NIFK Naive 1        |       |       |
| 4.96074688585232e-116 | -1.30406142031916     | 0.247 | 0.447 |
| 8.8445156227861e-112  | 1 HIST1H4C Naive 1    |       |       |
| 8.0343538677064e-115  | 0.410759325420039     | 0.763 | 0.689 |
| 1.43244495107337e-110 | 1 EMP3 Naive 1        |       |       |
| 1.19220351020745e-114 | -0.3128072580775 0.21 | 0.423 |       |
| 2.12557963834886e-110 | 1 NUCKS1 Naive 1      |       |       |
| 1.61619969074463e-114 | -1.18537524485324     | 0.047 | 0.162 |
| 2.8815224286286e-110  | 1 IGHA1 Naive 1       |       |       |

|                       |                    |       |       |
|-----------------------|--------------------|-------|-------|
| 6.33298828372277e-114 | 0.546483346106926  | 0.151 | 0.079 |
| 1.12910848110493e-109 | 1 PIK3IP1 Naive 1  |       |       |
| 1.61871883063873e-113 | -0.470825051871364 | 0.061 | 0.193 |
| 2.8860138031458e-109  | 1 BCL2A1 Naive 1   |       |       |
| 2.27421369237548e-112 | -0.326380128421268 | 0.094 | 0.262 |
| 4.05469559213624e-108 | 1 SSR3 Naive 1     |       |       |
| 1.95699845392969e-111 | -0.310232527038082 | 0.065 | 0.214 |
| 3.48913254351124e-107 | 1 GTPBP4 Naive 1   |       |       |
| 2.87480218238925e-110 | 0.622204943380427  | 0.254 | 0.188 |
| 5.1254848109818e-106  | 1 CHPT1 Naive 1    |       |       |
| 6.12302417457924e-108 | -0.306023466365361 | 0.086 | 0.253 |
| 1.09167398008573e-103 | 1 CHCHD10 Naive 1  |       |       |
| 1.16229118150707e-107 | -0.493777187717281 | 0.019 | 0.106 |
| 2.07224894750896e-103 | 1 KLK1 Naive 1     |       |       |
| 1.52796252700482e-107 | 0.671771393515918  | 0.388 | 0.341 |
| 2.72420438939689e-103 | 1 BIRC3 Naive 1    |       |       |
| 3.5528685852065e-107  | -0.371172671248975 | 0.027 | 0.131 |
| 6.33440940056466e-103 | 1 UBE2S Naive 1    |       |       |
| 3.93052834935838e-107 | 0.635455629293122  | 0.399 | 0.359 |
| 7.00773899407105e-103 | 1 RCS1 Naive 1     |       |       |
| 8.8829180962781e-107  | 0.596984013965075  | 0.203 | 0.137 |
| 1.58373546738542e-102 | 1 SUN2 Naive 1     |       |       |
| 6.17936045362385e-104 | -0.385761240906433 | 0.099 | 0.256 |
| 1.1017181752766e-99   | 1 GCHFR Naive 1    |       |       |
| 2.83064940168261e-103 | -0.305396700702903 | 0.094 | 0.255 |
| 5.04676481825993e-99  | 1 EIF4A1 Naive 1   |       |       |
| 5.19642441593859e-103 | -0.308366651184569 | 0.101 | 0.267 |
| 9.26470509117691e-99  | 1 DKC1 Naive 1     |       |       |
| 1.76635536941347e-100 | -0.322011557389177 | 0.101 | 0.26  |
| 3.14923498812728e-96  | 1 MYDGF Naive 1    |       |       |
| 3.55315874208453e-100 | -0.310175415284821 | 0.06  | 0.197 |
| 6.33492672126251e-96  | 1 LCK Naive 1      |       |       |
| 9.14283271547444e-100 | -0.353825351617176 | 0.044 | 0.16  |
| 1.63007564484194e-95  | 1 SDF2L1 Naive 1   |       |       |
| 3.62060452626765e-99  | 0.419069171567057  | 0.6   | 0.525 |
| 6.4551758098826e-95   | 1 ISG20 Naive 1    |       |       |
| 1.6543117743062e-97   | 0.624292399975939  | 0.198 | 0.136 |
| 2.94947246241053e-93  | 1 DUSP1 Naive 1    |       |       |
| 3.37293144966823e-96  | -0.367580007299911 | 0.09  | 0.236 |
| 6.01359948161348e-92  | 1 EIF4EBP1 Naive 1 |       |       |
| 2.26716488599611e-94  | 0.5863274356685    | 0.574 | 0.57  |
| 4.04212827524247e-90  | 1 SNX2 Naive 1     |       |       |
| 1.77057004115724e-93  | -0.384297273065555 | 0.058 | 0.174 |
| 3.15674932637924e-89  | 1 DDIT4 Naive 1    |       |       |
| 5.71882461432052e-93  | -0.318853647357098 | 0.464 | 0.659 |
| 1.01960924048721e-88  | 1 HERPUD1 Naive 1  |       |       |
| 1.05988855293249e-91  | 0.603252189316503  | 0.504 | 0.492 |
| 1.88967530102333e-87  | 1 SP100 Naive 1    |       |       |
| 1.60552663716369e-91  | -0.345362548886131 | 0.061 | 0.184 |
| 2.86249344139914e-87  | 1 SMC4 Naive 1     |       |       |

|                      |                    |         |       |
|----------------------|--------------------|---------|-------|
| 5.42226831501177e-91 | 0.547957612031868  | 0.206   | 0.151 |
| 9.66736217883448e-87 | 1 GLIPR1 Naive 1   |         |       |
| 1.65988354587028e-90 | 0.555303684950134  | 0.233   | 0.166 |
| 2.95940637393212e-86 | 1 MARCH1 Naive 1   |         |       |
| 2.51725188578286e-90 | 0.520255246441165  | 0.158   | 0.106 |
| 4.48800838716227e-86 | 1 PBXIP1 Naive 1   |         |       |
| 8.15592571021321e-89 | 0.584385759115916  | 0.315   | 0.26  |
| 1.45411999487391e-84 | 1 HHEX Naive 1     |         |       |
| 5.29802796408522e-88 | 0.633133968207989  | 0.484   | 0.452 |
| 9.44585405716754e-84 | 1 JUNB Naive 1     |         |       |
| 3.62600142271328e-87 | -1.31336175390098  | 0.188   | 0.318 |
| 6.46479793655551e-83 | 1 HMGB2 Naive 1    |         |       |
| 1.50359034006891e-84 | -0.572758059083832 | 0.437   | 0.589 |
| 2.68075121730887e-80 | 1 VIM Naive 1      |         |       |
| 2.91713607967177e-83 | 0.525779057959478  | 0.196   | 0.141 |
| 5.2009619164468e-79  | 1 ARRDC2 Naive 1   |         |       |
| 3.55412169070119e-83 | 0.578100738339032  | 0.241   | 0.203 |
| 6.33664356235114e-79 | 1 CCDC32 Naive 1   |         |       |
| 5.53018748411751e-83 | 0.643960352305003  | 0.264   | 0.228 |
| 9.8597712654331e-79  | 1 IL4R Naive 1     |         |       |
| 7.95041658271004e-83 | -0.385665650034842 | 0.022   | 0.103 |
| 1.41747977253137e-78 | 1 CCNB1 Naive 1    |         |       |
| 1.22470353023914e-82 | 0.613768141764445  | 0.389   | 0.356 |
| 2.18352392406335e-78 | 1 ARID5B Naive 1   |         |       |
| 1.87271038438389e-82 | -0.323905391867029 | 0.064   | 0.18  |
| 3.33885534431803e-78 | 1 CBX6 Naive 1     |         |       |
| 2.56836678685309e-82 | 0.595375858530205  | 0.318   | 0.281 |
| 4.57914114428037e-78 | 1 PPM1K Naive 1    |         |       |
| 4.97057094466838e-81 | -0.412653963004497 | 0.325   | 0.523 |
| 8.86203093724925e-77 | 1 SSR4 Naive 1     |         |       |
| 1.90841795961744e-80 | 0.514499216242307  | 0.159   | 0.102 |
| 3.40251838020194e-76 | 1 LINC02397        | Naive 1 |       |
| 3.92480466308483e-79 | 0.573955060049476  | 0.237   | 0.198 |
| 6.99753423381394e-75 | 1 IRF1 Naive 1     |         |       |
| 5.23841314719228e-79 | 0.515034132970507  | 0.515   | 0.485 |
| 9.33956680012912e-75 | 1 UCP2 Naive 1     |         |       |
| 7.33130528690201e-78 | 0.477503704828391  | 0.149   | 0.094 |
| 1.30709841960176e-73 | 1 RHOC Naive 1     |         |       |
| 2.97791669843937e-74 | -0.300515851066726 | 0.072   | 0.19  |
| 5.30932768164756e-70 | 1 PDIA4 Naive 1    |         |       |
| 1.21753867379385e-73 | 0.555023659170967  | 0.321   | 0.272 |
| 2.17074970150705e-69 | 1 ADAM28 Naive 1   |         |       |
| 2.58737166135722e-73 | -0.319711390928767 | 0.068   | 0.177 |
| 4.61302493503378e-69 | 1 MARCKS Naive 1   |         |       |
| 1.1836435837257e-72  | -0.364686287890151 | 0.082   | 0.2   |
| 2.11031814542454e-68 | 1 RGS2 Naive 1     |         |       |
| 4.87287554118638e-71 | 0.555671549419576  | 0.248   | 0.206 |
| 8.68784980238119e-67 | 1 FAM111B Naive 1  |         |       |
| 3.71790174895993e-69 | 0.513829779532563  | 0.385   | 0.346 |
| 6.62864702822065e-65 | 1 LY6E Naive 1     |         |       |

|                      |                    |                  |             |
|----------------------|--------------------|------------------|-------------|
| 2.4957384078449e-68  | 0.52213902552277   | 0.177            | 0.15        |
| 4.44965200734668e-64 | 1                  | TSPAN13 Naive 1  |             |
| 3.1599813036111e-67  | 0.418358221090099  |                  | 0.872 0.903 |
| 5.63393066620824e-63 | 1                  | DDX5 Naive 1     |             |
| 3.23877100597645e-66 | -2.14873407380297  |                  | 0.063 0.135 |
| 5.77440482655541e-62 | 1                  | IGHG2 Naive 1    |             |
| 9.06023118309394e-65 | 0.36623587377172   | 0.882            | 0.922       |
| 1.61534861763382e-60 | 1                  | PFDN5 Naive 1    |             |
| 1.03419441257998e-64 | 0.548959318168675  |                  | 0.402 0.397 |
| 1.84386521818884e-60 | 1                  | ORAI2 Naive 1    |             |
| 2.14455730923058e-63 | 0.516888749772786  |                  | 0.611 0.617 |
| 3.82353122662719e-59 | 1                  | MEF2C Naive 1    |             |
| 3.0005560310863e-62  | 0.438012327612094  |                  | 0.132 0.097 |
| 5.34969134782377e-58 | 1                  | CDKN2D Naive 1   |             |
| 4.90922420728197e-62 | 0.433267278639628  |                  | 0.13 0.091  |
| 8.75265583916302e-58 | 1                  | TMBIM1 Naive 1   |             |
| 6.92934716650753e-61 | 0.495324031728106  |                  | 0.228 0.19  |
| 1.23543330631663e-56 | 1                  | FAM129C Naive 1  |             |
| 1.72266670746784e-58 | -0.487904072757828 |                  | 0.059 0.141 |
| 3.0713424727444e-54  | 1                  | MYC Naive 1      |             |
| 1.73295763853983e-57 | 0.363763001430767  |                  | 0.775 0.776 |
| 3.08969017375266e-53 | 1                  | ARHGDI3 Naive 1  |             |
| 1.8144826411379e-57  | 0.494623840158114  |                  | 0.233 0.212 |
| 3.23504110088477e-53 | 1                  | YPEL3 Naive 1    |             |
| 1.02427667563836e-55 | 0.484433841695771  |                  | 0.418 0.413 |
| 1.82618288499562e-51 | 1                  | NPC2 Naive 1     |             |
| 3.20216459339239e-55 | 0.423493306988753  |                  | 0.77 0.822  |
| 5.70913925355928e-51 | 1                  | NOP53 Naive 1    |             |
| 3.33716218520585e-55 | 0.394207807386142  |                  | 0.104 0.073 |
| 5.94982646000351e-51 | 1                  | ACSS1 Naive 1    |             |
| 9.20632643392997e-54 | 0.468572921957417  |                  | 0.209 0.182 |
| 1.64139593990537e-49 | 1                  | ANKRD44 Naive 1  |             |
| 3.12446456487657e-52 | 0.455973423353112  |                  | 0.228 0.191 |
| 5.57060787271844e-48 | 1                  | CLEC2B Naive 1   |             |
| 8.75478104109616e-52 | -1.31867268953714  |                  | 0.316 0.415 |
| 1.56088991181703e-47 | 1                  | JCHAIN Naive 1   |             |
| 1.51016564765212e-50 | 0.504217890473385  |                  | 0.278 0.273 |
| 2.69247433319896e-46 | 1                  | RSRP1 Naive 1    |             |
| 1.27956691292742e-49 | 0.503011369784101  |                  | 0.38 0.384  |
| 2.28133984905829e-45 | 1                  | EVL Naive 1      |             |
| 4.90121124365193e-49 | 0.50789509067089   | 0.224            | 0.194       |
| 8.73836952630702e-45 | 1                  | YBX3 Naive 1     |             |
| 1.4601249539601e-48  | 0.403242199315609  |                  | 0.118 0.095 |
| 2.60325678041546e-44 | 1                  | GUCD1 Naive 1    |             |
| 2.25551284605624e-48 | 0.444189134576133  |                  | 0.646 0.681 |
| 4.02135385323368e-44 | 1                  | TAGLN2 Naive 1   |             |
| 1.32699463576133e-47 | 0.492760649981137  |                  | 0.292 0.277 |
| 2.36589873609888e-43 | 1                  | RNASET2 Naive 1  |             |
| 1.39639215632872e-47 | 0.467720187080258  |                  | 0.246 0.23  |
| 2.48962757551848e-43 | 1                  | HSD17B11 Naive 1 |             |

|                      |                    |         |       |
|----------------------|--------------------|---------|-------|
| 5.06455972506146e-47 | 0.491882447041372  | 0.151   | 0.119 |
| 9.02960353381207e-43 | 1 AL139020.1       | Naive 1 |       |
| 1.53593540291213e-46 | 0.367933056451496  | 0.124   | 0.085 |
| 2.73841922985204e-42 | 1 CCR6 Naive 1     |         |       |
| 2.58631768120578e-41 | -1.70480777821326  | 0.156   | 0.255 |
| 4.61114579382178e-37 | 1 IGHG4 Naive 1    |         |       |
| 3.57473591979388e-41 | 0.462157052493459  | 0.208   | 0.197 |
| 6.37339667140051e-37 | 1 CLK1 Naive 1     |         |       |
| 6.85094842109634e-41 | 0.464126313373216  | 0.386   | 0.389 |
| 1.22145559399727e-36 | 1 EVI2B Naive 1    |         |       |
| 7.22540114561774e-41 | 0.491917684332777  | 0.274   | 0.281 |
| 1.28821677025219e-36 | 1 SMCHD1 Naive 1   |         |       |
| 9.17669629438024e-41 | 0.360664044030593  | 0.116   | 0.088 |
| 1.63611318232505e-36 | 1 ANXA4 Naive 1    |         |       |
| 8.95252809545225e-40 | 0.377521394479161  | 0.165   | 0.133 |
| 1.59614623413818e-35 | 1 FCER2 Naive 1    |         |       |
| 1.24983267566729e-39 | 0.441173535439501  | 0.195   | 0.185 |
| 2.22832667744722e-35 | 1 CDCA7L Naive 1   |         |       |
| 1.50748531482247e-38 | 0.374871080513737  | 0.138   | 0.109 |
| 2.68769556779699e-34 | 1 P2RY10 Naive 1   |         |       |
| 2.2597906540108e-38  | 0.420146006496083  | 0.178   | 0.166 |
| 4.02898075703586e-34 | 1 BNIP3L Naive 1   |         |       |
| 5.75658389551013e-38 | 0.360796515337452  | 0.134   | 0.112 |
| 1.0263413427305e-33  | 1 CLN8 Naive 1     |         |       |
| 1.23745348832966e-37 | 0.348168106491253  | 0.112   | 0.093 |
| 2.20625582434296e-33 | 1 ABTB1 Naive 1    |         |       |
| 2.60432280608512e-37 | -0.678247752951414 | 0.114   | 0.225 |
| 4.64324713096917e-33 | 1 PLCG2 Naive 1    |         |       |
| 9.72828128222944e-37 | 0.336699374066957  | 0.101   | 0.082 |
| 1.73445526980869e-32 | 1 KLHL24 Naive 1   |         |       |
| 2.10414664299867e-36 | 0.381431828138291  | 0.136   | 0.114 |
| 3.75148304980233e-32 | 1 SAMD9 Naive 1    |         |       |
| 4.72149212334189e-36 | 0.424129701016041  | 0.165   | 0.158 |
| 8.41794830670625e-32 | 1 APLP2 Naive 1    |         |       |
| 7.9775046367111e-35  | 0.436822339460063  | 0.283   | 0.286 |
| 1.42230930167922e-30 | 1 SP110 Naive 1    |         |       |
| 5.09124001505653e-34 | 0.458184322416846  | 0.442   | 0.48  |
| 9.07717182284429e-30 | 1 N4BP2L2 Naive 1  |         |       |
| 5.26050799681519e-34 | 0.36570232463441   | 0.127   | 0.102 |
| 9.3789597075218e-30  | 1 MTSS1 Naive 1    |         |       |
| 4.98964841872689e-33 | 0.467767375747936  | 0.383   | 0.406 |
| 8.89604416574817e-29 | 1 STX7 Naive 1     |         |       |
| 6.86123609718285e-33 | 0.434222920845326  | 0.214   | 0.212 |
| 1.22328978376673e-28 | 1 WASHC4 Naive 1   |         |       |
| 3.41748860855328e-32 | 0.474628682290618  | 0.453   | 0.489 |
| 6.09304044018964e-28 | 1 NEAT1 Naive 1    |         |       |
| 5.35246697904884e-32 | 0.373930805004213  | 0.162   | 0.151 |
| 9.54291337694618e-28 | 1 SRPK2 Naive 1    |         |       |
| 5.6109576413669e-32  | 0.376026716940895  | 0.192   | 0.182 |
| 1.00037763787931e-27 | 1 MBP Naive 1      |         |       |

|                      |                        |       |       |
|----------------------|------------------------|-------|-------|
| 4.36905766941395e-31 | 0.330091515541145      | 0.106 | 0.09  |
| 7.78959291879812e-27 | 1 RALB Naive 1         |       |       |
| 1.59908718252648e-30 | 0.366897968183151      | 0.164 | 0.147 |
| 2.85101253772647e-26 | 1 CELF2 Naive 1        |       |       |
| 4.59317669274273e-30 | 0.408285266744913      | 0.289 | 0.298 |
| 8.18917472549102e-26 | 1 PDLIM1 Naive 1       |       |       |
| 1.23761207941653e-29 | 0.388100823749914      | 0.285 | 0.283 |
| 2.20653857639173e-25 | 1 GNG7 Naive 1         |       |       |
| 4.75560908853439e-29 | 0.424716799106395      | 0.458 | 0.497 |
| 8.47877544394797e-25 | 1 ANKRD12 Naive 1      |       |       |
| 6.28235339102014e-29 | 0.358889819537004      | 0.602 | 0.629 |
| 1.12008078608498e-24 | 1 HLA-DMB Naive 1      |       |       |
| 8.04002110924303e-29 | 0.39549328275825 0.149 | 0.145 |       |
| 1.43345536356694e-24 | 1 TAGAP Naive 1        |       |       |
| 1.95988800403162e-28 | 0.329436659453187      | 0.126 | 0.116 |
| 3.49428432238798e-24 | 1 HPCAL1 Naive 1       |       |       |
| 2.35452823159166e-28 | 0.336327016360852      | 0.133 | 0.128 |
| 4.19788838410477e-24 | 1 ICAM2 Naive 1        |       |       |
| 5.02103398012711e-28 | 0.343106457798126      | 0.132 | 0.121 |
| 8.95200148316862e-24 | 1 RNF213 Naive 1       |       |       |
| 5.33305092553502e-27 | 0.367941767080956      | 0.166 | 0.165 |
| 9.50829649513638e-23 | 1 RNF13 Naive 1        |       |       |
| 9.62200156223618e-27 | 0.316671131436709      | 0.115 | 0.095 |
| 1.71550665853109e-22 | 1 BTLA Naive 1         |       |       |
| 3.08454681629228e-26 | 0.414876407927626      | 0.268 | 0.287 |
| 5.49943851876751e-22 | 1 YPEL5 Naive 1        |       |       |
| 4.30766974591977e-26 | 0.411176092868865      | 0.188 | 0.183 |
| 7.68014439000036e-22 | 1 PLPP5 Naive 1        |       |       |
| 6.38748611254232e-26 | 0.314809564936152      | 0.117 | 0.103 |
| 1.13882489900517e-21 | 1 PDE4B Naive 1        |       |       |
| 7.07912964373066e-26 | 0.418761216856234      | 0.457 | 0.496 |
| 1.26213802418074e-21 | 1 CYTIP Naive 1        |       |       |
| 2.87386714424915e-25 | 0.430058283918197      | 0.301 | 0.321 |
| 5.12381773148181e-21 | 1 SNHG7 Naive 1        |       |       |
| 5.73090497097586e-25 | 0.36523641946386 0.168 | 0.174 |       |
| 1.02176304727529e-20 | 1 BLCAP Naive 1        |       |       |
| 1.23551878204468e-24 | 0.332094432441813      | 0.14  | 0.132 |
| 2.20280643650747e-20 | 1 ODF2L Naive 1        |       |       |
| 4.28452360657715e-24 | 0.360532180064319      | 0.172 | 0.168 |
| 7.6388771381664e-20  | 1 TMEM154 Naive 1      |       |       |
| 4.58045656872265e-24 | 0.421334111079179      | 0.363 | 0.403 |
| 8.16649601637561e-20 | 1 BLOC1S2 Naive 1      |       |       |
| 7.95303393978238e-24 | 0.374470756391555      | 0.198 | 0.203 |
| 1.4179464211238e-19  | 1 TRIM38 Naive 1       |       |       |
| 1.7213581415355e-23  | 0.333706268937725      | 0.124 | 0.116 |
| 3.06900943054364e-19 | 1 CARD16 Naive 1       |       |       |
| 3.07434867389317e-23 | 0.365792383412025      | 0.404 | 0.43  |
| 5.48125625068413e-19 | 1 PLP2 Naive 1         |       |       |
| 6.67907636549855e-23 | 0.411279370881261      | 0.296 | 0.323 |
| 1.19081252520474e-18 | 1 LTA4H Naive 1        |       |       |



|                      |                        |       |       |
|----------------------|------------------------|-------|-------|
| 7.15843147659597e-23 | 0.411812886767737      | 0.555 | 0.624 |
| 1.2762767479623e-18  | 1 PNISR Naive 1        |       |       |
| 1.58628985923173e-22 | 0.339307097873711      | 0.166 | 0.156 |
| 2.82819619002425e-18 | 1 SLC2A3 Naive 1       |       |       |
| 2.56491829529714e-22 | 0.336285580219772      | 0.144 | 0.142 |
| 4.57299282868527e-18 | 1 LY9 Naive 1          |       |       |
| 5.59163267738889e-22 | 0.374770490402403      | 0.281 | 0.295 |
| 9.96932190051666e-18 | 1 BCL11A Naive 1       |       |       |
| 1.5316360378674e-21  | -0.566833685143389     | 0.203 | 0.272 |
| 2.73075389191379e-17 | 1 S100A4 Naive 1       |       |       |
| 6.19528136258675e-21 | 0.334561938503144      | 0.138 | 0.14  |
| 1.10455671413559e-16 | 1 ADD3 Naive 1         |       |       |
| 1.88537007643745e-20 | 0.400559935493674      | 0.352 | 0.391 |
| 3.36142630928034e-16 | 1 PSAP Naive 1         |       |       |
| 2.1381977793956e-20  | 0.355773571088391      | 0.219 | 0.23  |
| 3.81219282088442e-16 | 1 NT5C3A Naive 1       |       |       |
| 3.50154244403182e-20 | 0.372298501239616      | 0.288 | 0.305 |
| 6.24290002346432e-16 | 1 BCL7A Naive 1        |       |       |
| 1.42318544427569e-19 | 0.3488744092344 0.194  | 0.207 |       |
| 2.53739732859912e-15 | 1 RALGPS2 Naive 1      |       |       |
| 1.56025707574144e-19 | 0.338385784050345      | 0.154 | 0.16  |
| 2.78178234033942e-15 | 1 AIDA Naive 1         |       |       |
| 1.65910554087585e-19 | 0.36728024867792 0.233 | 0.257 |       |
| 2.95801926882755e-15 | 1 TBC1D10C Naive 1     |       |       |
| 4.10231104283668e-19 | 0.315198008155307      | 0.161 | 0.164 |
| 7.31401035827351e-15 | 1 TNFRSF14 Naive 1     |       |       |
| 4.85479131124705e-19 | 0.325072682847798      | 0.156 | 0.163 |
| 8.65560742882236e-15 | 1 FAM215B Naive 1      |       |       |
| 6.2490756931196e-19  | 0.347163836373956      | 0.577 | 0.624 |
| 1.11414770532629e-14 | 1 CLEC2D Naive 1       |       |       |
| 7.59370549864249e-19 | 0.301151532522673      | 0.126 | 0.13  |
| 1.35388175335297e-14 | 1 SIPA1 Naive 1        |       |       |
| 8.3372803148814e-19  | 0.377929795736983      | 0.296 | 0.324 |
| 1.4864537073402e-14  | 1 TNFRSF13C Naive 1    |       |       |
| 1.19993668108479e-18 | 0.315436031158055      | 0.13  | 0.129 |
| 2.13936710870607e-14 | 1 CLK4 Naive 1         |       |       |
| 2.19635027030152e-18 | 0.38237995961181 0.566 | 0.627 |       |
| 3.91587289692058e-14 | 1 IFI16 Naive 1        |       |       |
| 1.26829521549409e-17 | 0.301925750870236      | 0.125 | 0.125 |
| 2.26124353970441e-13 | 1 AC025164.1 Naive 1   |       |       |
| 1.47957361652956e-17 | 0.393139202371467      | 0.455 | 0.524 |
| 2.63793180091056e-13 | 1 VAMP2 Naive 1        |       |       |
| 7.57872672388586e-17 | 0.401365800830859      | 0.403 | 0.462 |
| 1.35121118760161e-12 | 1 CTSS Naive 1         |       |       |
| 2.20533518851435e-16 | 0.31896434650793 0.19  | 0.204 |       |
| 3.93189210760224e-12 | 1 BIN1 Naive 1         |       |       |
| 5.23001522884323e-16 | 0.310173971727903      | 0.141 | 0.153 |
| 9.32459415150459e-12 | 1 CHMP1B Naive 1       |       |       |
| 6.25575844868523e-16 | 0.351652280871792      | 0.266 | 0.292 |
| 1.11533917381609e-11 | 1 RUBCNL Naive 1       |       |       |

|                      |                    |          |       |       |       |
|----------------------|--------------------|----------|-------|-------|-------|
| 1.10619748779586e-15 | 0.30571011756988   | 0.134    | 0.142 |       |       |
| 1.97223950099123e-11 | 1                  | ADD1     | Naive | 1     |       |
| 1.82406072068086e-15 | 0.334710143428501  |          | 0.163 | 0.181 |       |
| 3.2521178589019e-11  | 1                  | HEXA     | Naive | 1     |       |
| 2.23035160701524e-13 | 0.33812805449818   | 0.349    | 0.395 |       |       |
| 3.97649388014746e-09 | 1                  | ARL6IP5  | Naive | 1     |       |
| 5.65209001998892e-13 | 0.348866746818169  |          | 0.647 | 0.733 |       |
| 1.00771112966382e-08 | 1                  | SRSF5    | Naive | 1     |       |
| 2.8435084234513e-12  | 0.314014355059635  |          | 0.168 | 0.19  |       |
| 5.06969116817132e-08 | 1                  | HLA-D0B  | Naive | 1     |       |
| 7.38963988026414e-12 | 0.337424102888242  |          | 0.232 | 0.268 |       |
| 1.31749889425229e-07 | 1                  | TTC3     | Naive | 1     |       |
| 6.36449055652854e-11 | 0.333160655555796  |          | 0.227 | 0.265 |       |
| 1.13472502132347e-06 | 1                  | MAT2B    | Naive | 1     |       |
| 7.31255810416117e-11 | 0.344530649003238  |          | 0.283 | 0.335 |       |
| 1.3037559843909e-06  | 1                  | CCNDBP1  | Naive | 1     |       |
| 1.61609412916884e-10 | -0.67657554536946  |          | 0.903 | 0.93  |       |
| 2.88133422289513e-06 | 1                  | IGKC     | Naive | 1     |       |
| 5.12127369107352e-10 | 0.30279809655579   | 0.229    | 0.26  |       |       |
| 9.13071886381498e-06 | 1                  | LYSMD2   | Naive | 1     |       |
| 9.4585491060971e-10  | 0.326960746936434  |          | 0.247 | 0.291 |       |
| 1.68636472012605e-05 | 1                  | PLEKHF2  | Naive | 1     |       |
| 1.05041575636553e-09 | 0.300387307688269  |          | 0.25  | 0.29  |       |
| 1.87278625202411e-05 | 1                  | ACAP1    | Naive | 1     |       |
| 1.44173898528347e-09 | 0.325093354950701  |          | 0.32  | 0.368 |       |
| 2.5704764368619e-05  | 1                  | ANXA6    | Naive | 1     |       |
| 3.37473738534413e-09 | 0.307014661389604  |          | 0.219 | 0.258 |       |
| 6.01681928433005e-05 | 1                  | PRDM2    | Naive | 1     |       |
| 1.17548316723843e-08 | 0.321706132555183  |          | 0.21  | 0.249 |       |
| 0.000209576893886939 | 1                  | GCC2     | Naive | 1     |       |
| 3.01854413704197e-08 | 0.320649805442686  |          | 0.249 | 0.305 |       |
| 0.000538176234193213 | 1                  | MPHOSPH8 | Naive | 1     |       |
| 4.10481508239294e-08 | 0.320727171583904  |          | 0.327 | 0.391 |       |
| 0.000731847481039837 | 1                  | LAPTM4A  | Naive | 1     |       |
| 7.17735868656787e-08 | 0.324990031802727  |          | 0.283 | 0.341 |       |
| 0.00127965128022819  | 1                  | BTK      | Naive | 1     |       |
| 1.18867611445953e-07 | 0.305908407093395  |          | 0.409 | 0.48  |       |
| 0.00211929064446989  | 1                  | GPSM3    | Naive | 1     |       |
| 1.98363523300766e-07 | 0.317597839591154  |          | 0.442 | 0.521 |       |
| 0.00353662325692935  | 1                  | C6orf48  | Naive | 1     |       |
| 2.07956584959837e-07 | -1.29203942140165  |          | 0.579 | 0.654 |       |
| 0.00370765795324893  | 1                  | IGLC2    | Naive | 1     |       |
| 6.4322275577815e-06  | -0.364110476843682 |          | 0.381 | 0.435 |       |
| 0.114680185127686    | 1                  | STMN1    | Naive | 1     |       |
| 5.25736742276033e-05 | 0.307527540232204  |          | 0.349 | 0.43  |       |
| 0.937336037803939    | 1                  | KMT2E    | Naive | 1     |       |
| 0                    | 1.75929818018284   | 0.813    | 0.359 | 0     | 2     |
| Activated NME1       |                    |          |       |       | FABP5 |
| 0                    | 1.65254654934553   | 0.775    | 0.247 | 0     | 2     |
| Activated NME1       |                    |          |       |       | NME1  |

|   |                  |       |       |   |   |          |
|---|------------------|-------|-------|---|---|----------|
| 0 | 1.59306350013214 | 0.747 | 0.236 | 0 | 2 | MIR155HG |
|   | Activated NME1   |       |       |   |   |          |
| 0 | 1.58868802055569 | 0.982 | 0.686 | 0 | 2 | EN01     |
|   | Activated NME1   |       |       |   |   |          |
| 0 | 1.51102989742955 | 0.998 | 0.832 | 0 | 2 | HSP90AB1 |
|   | Activated NME1   |       |       |   |   |          |
| 0 | 1.36452783443915 | 0.811 | 0.364 | 0 | 2 | TXN      |
|   | Activated NME1   |       |       |   |   |          |
| 0 | 1.33455895208333 | 0.552 | 0.13  | 0 | 2 | TNFRSF18 |
|   | Activated NME1   |       |       |   |   |          |
| 0 | 1.32749862557487 | 0.481 | 0.098 | 0 | 2 | PSAT1    |
|   | Activated NME1   |       |       |   |   |          |
| 0 | 1.26949978561741 | 0.823 | 0.421 | 0 | 2 | HSPD1    |
|   | Activated NME1   |       |       |   |   |          |
| 0 | 1.2650070341703  | 0.861 | 0.458 | 0 | 2 | HSPE1    |
|   | Activated NME1   |       |       |   |   |          |
| 0 | 1.2531057286248  | 0.673 | 0.237 | 0 | 2 | SRM      |
|   | Activated NME1   |       |       |   |   |          |
| 0 | 1.24162293005019 | 0.897 | 0.564 | 0 | 2 | LDHA     |
|   | Activated NME1   |       |       |   |   |          |
| 0 | 1.23604394435331 | 0.912 | 0.487 | 0 | 2 | PSME2    |
|   | Activated NME1   |       |       |   |   |          |
| 0 | 1.23507671092199 | 0.79  | 0.34  | 0 | 2 | NHP2     |
|   | Activated NME1   |       |       |   |   |          |
| 0 | 1.22381688934689 | 0.868 | 0.443 | 0 | 2 | RANBP1   |
|   | Activated NME1   |       |       |   |   |          |
| 0 | 1.19611496911836 | 0.993 | 0.922 | 0 | 2 | NPM1     |
|   | Activated NME1   |       |       |   |   |          |
| 0 | 1.18606931282761 | 0.852 | 0.475 | 0 | 2 | PA2G4    |
|   | Activated NME1   |       |       |   |   |          |
| 0 | 1.18442222971449 | 0.549 | 0.181 | 0 | 2 | EIF4EBP1 |
|   | Activated NME1   |       |       |   |   |          |
| 0 | 1.17869919163989 | 0.998 | 0.936 | 0 | 2 | YBX1     |
|   | Activated NME1   |       |       |   |   |          |
| 0 | 1.17566721691676 | 0.857 | 0.526 | 0 | 2 | NCL      |
|   | Activated NME1   |       |       |   |   |          |
| 0 | 1.17240846611717 | 0.901 | 0.566 | 0 | 2 | PRDX1    |
|   | Activated NME1   |       |       |   |   |          |
| 0 | 1.12792459214079 | 0.285 | 0.041 | 0 | 2 | NPW      |
|   | Activated NME1   |       |       |   |   |          |
| 0 | 1.12556009726922 | 0.466 | 0.076 | 0 | 2 | PYCR1    |
|   | Activated NME1   |       |       |   |   |          |
| 0 | 1.11956543833073 | 0.957 | 0.711 | 0 | 2 | HSPA8    |
|   | Activated NME1   |       |       |   |   |          |
| 0 | 1.10159320194221 | 0.961 | 0.725 | 0 | 2 | RAN      |
|   | Activated NME1   |       |       |   |   |          |
| 0 | 1.03668511077577 | 0.752 | 0.353 | 0 | 2 | PHB      |
|   | Activated NME1   |       |       |   |   |          |
| 0 | 1.02368721872715 | 0.658 | 0.28  | 0 | 2 | DDX21    |
|   | Activated NME1   |       |       |   |   |          |

|          |                        |       |       |   |      |     |
|----------|------------------------|-------|-------|---|------|-----|
| 0        | 0.995019439842536      | 0.605 | 0.27  | 0 | 2    |     |
| ODC1     | Activated NME1         |       |       |   |      |     |
| 0        | 0.985813368346043      | 0.524 | 0.162 | 0 | 2    |     |
| EBNA1BP2 | Activated NME1         |       |       |   |      |     |
| 0        | 0.982967285305793      | 0.538 | 0.164 | 0 | 2    |     |
| NPM3     | Activated NME1         |       |       |   |      |     |
| 0        | 0.976649819219753      | 0.683 | 0.312 | 0 | 2    |     |
| TIMM13   | Activated NME1         |       |       |   |      |     |
| 0        | 0.975345441560952      | 0.708 | 0.324 | 0 | 2    |     |
| HSPA9    | Activated NME1         |       |       |   |      |     |
| 0        | 0.965503713751972      | 0.531 | 0.201 | 0 | 2    |     |
| MTHFD2   | Activated NME1         |       |       |   |      |     |
| 0        | 0.950963626782393      | 0.65  | 0.291 | 0 | 2    |     |
| SLC3A2   | Activated NME1         |       |       |   |      |     |
| 0        | 0.949030154110251      | 0.711 | 0.367 | 0 | 2    |     |
| RPL22L1  | Activated NME1         |       |       |   |      |     |
| 0        | 0.948836003114843      | 0.875 | 0.538 | 0 | 2    |     |
| SNRPE    | Activated NME1         |       |       |   |      |     |
| 0        | 0.942186344683227      | 0.745 | 0.409 | 0 | 2    |     |
| PPA1     | Activated NME1         |       |       |   |      |     |
| 0        | 0.931964596009407      | 0.768 | 0.407 | 0 | 2    |     |
| CCT6A    | Activated NME1         |       |       |   |      |     |
| 0        | 0.929764699116137      | 0.768 | 0.409 | 0 | 2    |     |
| C1QBP    | Activated NME1         |       |       |   |      |     |
| 0        | 0.916100394154654      | 0.789 | 0.428 | 0 | 2    |     |
| PRMT1    | Activated NME1         |       |       |   |      |     |
| 0        | 0.91118629770386 0.554 | 0.217 | 0     | 2 | GARS |     |
|          | Activated NME1         |       |       |   |      |     |
| 0        | 0.908347729040697      | 0.938 | 0.651 | 0 | 2    |     |
| SRSF3    | Activated NME1         |       |       |   |      |     |
| 0        | 0.901209983687697      | 0.82  | 0.481 | 0 | 2    |     |
| SSBP1    | Activated NME1         |       |       |   |      |     |
| 0        | 0.898788901580502      | 0.608 | 0.269 | 0 | 2    |     |
| ATP1B3   | Activated NME1         |       |       |   |      |     |
| 0        | 0.893798528959079      | 0.967 | 0.738 | 0 | 2    | PKM |
|          | Activated NME1         |       |       |   |      |     |
| 0        | 0.889940330010455      | 0.767 | 0.414 | 0 | 2    |     |
| ILF2     | Activated NME1         |       |       |   |      |     |
| 0        | 0.883040505004033      | 0.766 | 0.435 | 0 | 2    |     |
| CYCS     | Activated NME1         |       |       |   |      |     |
| 0        | 0.872914528299025      | 0.513 | 0.185 | 0 | 2    |     |
| MRPL12   | Activated NME1         |       |       |   |      |     |
| 0        | 0.87171891879613 0.733 | 0.395 | 0     | 2 | CCT2 |     |
|          | Activated NME1         |       |       |   |      |     |
| 0        | 0.870641738039086      | 0.493 | 0.15  | 0 | 2    |     |
| FKBP4    | Activated NME1         |       |       |   |      |     |
| 0        | 0.865403504393098      | 0.703 | 0.355 | 0 | 2    |     |
| CCT5     | Activated NME1         |       |       |   |      |     |
| 0        | 0.857350045498905      | 0.473 | 0.15  | 0 | 2    |     |
| CMSS1    | Activated NME1         |       |       |   |      |     |

|          |                   |       |       |   |   |       |
|----------|-------------------|-------|-------|---|---|-------|
| 0        | 0.852591696397914 | 0.483 | 0.155 | 0 | 2 |       |
| GPATCH4  | Activated NME1    |       |       |   |   |       |
| 0        | 0.845092365693125 | 0.526 | 0.196 | 0 | 2 |       |
| MRPL3    | Activated NME1    |       |       |   |   |       |
| 0        | 0.841500621426634 | 0.953 | 0.725 | 0 | 2 |       |
| HSP90AA1 | Activated NME1    |       |       |   |   |       |
| 0        | 0.837969703910173 | 0.851 | 0.545 | 0 | 2 |       |
| APRT     | Activated NME1    |       |       |   |   |       |
| 0        | 0.836926518305684 | 0.443 | 0.133 | 0 | 2 |       |
| MRT04    | Activated NME1    |       |       |   |   |       |
| 0        | 0.836072104363487 | 0.521 | 0.216 | 0 | 2 |       |
| DKC1     | Activated NME1    |       |       |   |   |       |
| 0        | 0.833455508084056 | 0.96  | 0.738 | 0 | 2 |       |
| PSMA7    | Activated NME1    |       |       |   |   |       |
| 0        | 0.831163999474123 | 0.622 | 0.289 | 0 | 2 |       |
| NOP56    | Activated NME1    |       |       |   |   |       |
| 0        | 0.825836232813778 | 0.479 | 0.171 | 0 | 2 |       |
| TOMM40   | Activated NME1    |       |       |   |   |       |
| 0        | 0.821569890589266 | 0.932 | 0.678 | 0 | 2 |       |
| TPI1     | Activated NME1    |       |       |   |   |       |
| 0        | 0.806992787718712 | 0.717 | 0.399 | 0 | 2 |       |
| SLIRP    | Activated NME1    |       |       |   |   |       |
| 0        | 0.80277254559768  | 0.418 | 0.128 | 0 | 2 | NOLC1 |
|          | Activated NME1    |       |       |   |   |       |
| 0        | 0.802072015108018 | 0.41  | 0.113 | 0 | 2 |       |
| NOP16    | Activated NME1    |       |       |   |   |       |
| 0        | 0.800496592094825 | 0.588 | 0.264 | 0 | 2 |       |
| PDCD5    | Activated NME1    |       |       |   |   |       |
| 0        | 0.794086253065539 | 0.638 | 0.305 | 0 | 2 | MIF   |
|          | Activated NME1    |       |       |   |   |       |
| 0        | 0.787313965898391 | 0.509 | 0.203 | 0 | 2 |       |
| CDK4     | Activated NME1    |       |       |   |   |       |
| 0        | 0.786155062710006 | 0.724 | 0.395 | 0 | 2 |       |
| CCT4     | Activated NME1    |       |       |   |   |       |
| 0        | 0.785705471054837 | 0.438 | 0.143 | 0 | 2 |       |
| ASNS     | Activated NME1    |       |       |   |   |       |
| 0        | 0.781956888729269 | 0.396 | 0.108 | 0 | 2 |       |
| IFRD2    | Activated NME1    |       |       |   |   |       |
| 0        | 0.776511038014416 | 0.687 | 0.355 | 0 | 2 |       |
| SHMT2    | Activated NME1    |       |       |   |   |       |
| 0        | 0.759762318192504 | 0.825 | 0.52  | 0 | 2 |       |
| PSMA1    | Activated NME1    |       |       |   |   |       |
| 0        | 0.759662538655413 | 0.748 | 0.411 | 0 | 2 |       |
| ATP5MC1  | Activated NME1    |       |       |   |   |       |
| 0        | 0.757744564399663 | 0.707 | 0.404 | 0 | 2 |       |
| EIF5B    | Activated NME1    |       |       |   |   |       |
| 0        | 0.755392433993726 | 0.573 | 0.271 | 0 | 2 |       |
| NOP58    | Activated NME1    |       |       |   |   |       |
| 0        | 0.755212434911577 | 0.607 | 0.273 | 0 | 2 |       |
| TMEM147  | Activated NME1    |       |       |   |   |       |

|                |                   |       |       |       |   |       |
|----------------|-------------------|-------|-------|-------|---|-------|
| 0              | 0.75187598607029  | 0.643 | 0.333 | 0     | 2 | EIF3J |
| Activated NME1 |                   |       |       |       |   |       |
| 0              | 0.750657681531205 |       | 0.856 | 0.59  | 0 | 2     |
| SERBP1         | Activated NME1    |       |       |       |   |       |
| 0              | 0.743953744923215 |       | 0.413 | 0.128 | 0 | 2     |
| GAR1           | Activated NME1    |       |       |       |   |       |
| 0              | 0.740183838370068 |       | 0.885 | 0.604 | 0 | 2     |
| COX7B          | Activated NME1    |       |       |       |   |       |
| 0              | 0.740171118288095 |       | 0.406 | 0.121 | 0 | 2     |
| RPF2           | Activated NME1    |       |       |       |   |       |
| 0              | 0.739267022498804 |       | 0.923 | 0.672 | 0 | 2     |
| HNRNPDL        | Activated NME1    |       |       |       |   |       |
| 0              | 0.738715410578102 |       | 0.763 | 0.442 | 0 | 2     |
| SNRPD1         | Activated NME1    |       |       |       |   |       |
| 0              | 0.736573217742486 |       | 0.485 | 0.166 | 0 | 2     |
| YBX3           | Activated NME1    |       |       |       |   |       |
| 0              | 0.72900151208405  | 0.719 | 0.423 | 0     | 2 | VDAC1 |
| Activated NME1 |                   |       |       |       |   |       |
| 0              | 0.728226783724328 |       | 0.783 | 0.438 | 0 | 2     |
| CD83           | Activated NME1    |       |       |       |   |       |
| 0              | 0.727377250459855 |       | 0.709 | 0.388 | 0 | 2     |
| EIF6           | Activated NME1    |       |       |       |   |       |
| 0              | 0.7248565827602   | 0.654 | 0.344 | 0     | 2 | PSMC1 |
| Activated NME1 |                   |       |       |       |   |       |
| 0              | 0.719502926789199 |       | 0.39  | 0.129 | 0 | 2     |
| PAICS          | Activated NME1    |       |       |       |   |       |
| 0              | 0.715573472001298 |       | 0.465 | 0.179 | 0 | 2     |
| GNL3           | Activated NME1    |       |       |       |   |       |
| 0              | 0.713662713613876 |       | 0.586 | 0.274 | 0 | 2     |
| PSMD11         | Activated NME1    |       |       |       |   |       |
| 0              | 0.711770132104899 |       | 0.494 | 0.196 | 0 | 2     |
| DCAF13         | Activated NME1    |       |       |       |   |       |
| 0              | 0.703244141658572 |       | 0.757 | 0.482 | 0 | 2     |
| TALD01         | Activated NME1    |       |       |       |   |       |
| 0              | 0.702193190833997 |       | 0.77  | 0.459 | 0 | 2     |
| CCT3           | Activated NME1    |       |       |       |   |       |
| 0              | 0.702123958417456 |       | 0.369 | 0.109 | 0 | 2     |
| NDUFAF2        | Activated NME1    |       |       |       |   |       |
| 0              | 0.701613287448405 |       | 0.507 | 0.213 | 0 | 2     |
| POLD2          | Activated NME1    |       |       |       |   |       |
| 0              | 0.701446483099054 |       | 0.456 | 0.168 | 0 | 2     |
| ATIC           | Activated NME1    |       |       |       |   |       |
| 0              | 0.699309158612151 |       | 0.85  | 0.566 | 0 | 2     |
| SRSF2          | Activated NME1    |       |       |       |   |       |
| 0              | 0.698581663739805 |       | 0.896 | 0.63  | 0 | 2     |
| PSMB1          | Activated NME1    |       |       |       |   |       |
| 0              | 0.697059600059505 |       | 0.833 | 0.544 | 0 | 2     |
| PARK7          | Activated NME1    |       |       |       |   |       |
| 0              | 0.693044361382298 |       | 0.76  | 0.469 | 0 | 2     |
| TUFM           | Activated NME1    |       |       |       |   |       |

|            |                   |       |       |   |   |       |
|------------|-------------------|-------|-------|---|---|-------|
| 0          | 0.690472432548453 | 0.846 | 0.557 | 0 | 2 |       |
| EIF2S2     | Activated NME1    |       |       |   |   |       |
| 0          | 0.689549147848193 | 0.651 | 0.344 | 0 | 2 |       |
| PSMC3      | Activated NME1    |       |       |   |   |       |
| 0          | 0.685509124589675 | 0.695 | 0.388 | 0 | 2 |       |
| NUDC       | Activated NME1    |       |       |   |   |       |
| 0          | 0.675554713996501 | 0.816 | 0.501 | 0 | 2 |       |
| IMPDH2     | Activated NME1    |       |       |   |   |       |
| 0          | 0.674779177222157 | 0.748 | 0.45  | 0 | 2 |       |
| RSL1D1     | Activated NME1    |       |       |   |   |       |
| 0          | 0.671082748966124 | 0.295 | 0.052 | 0 | 2 |       |
| MTHFD1L    | Activated NME1    |       |       |   |   |       |
| 0          | 0.668089300437995 | 0.772 | 0.473 | 0 | 2 |       |
| XRCC5      | Activated NME1    |       |       |   |   |       |
| 0          | 0.663972698871452 | 0.701 | 0.391 | 0 | 2 |       |
| APEX1      | Activated NME1    |       |       |   |   |       |
| 0          | 0.662564974940533 | 0.715 | 0.414 | 0 | 2 |       |
| CCT7       | Activated NME1    |       |       |   |   |       |
| 0          | 0.658220162950305 | 0.893 | 0.605 | 0 | 2 |       |
| PSMA4      | Activated NME1    |       |       |   |   |       |
| 0          | 0.652742762174688 | 0.658 | 0.358 | 0 | 2 |       |
| MRPL20     | Activated NME1    |       |       |   |   |       |
| 0          | 0.645005350795531 | 0.723 | 0.431 | 0 | 2 |       |
| GADD45GIP1 | Activated NME1    |       |       |   |   |       |
| 0          | 0.644609636204774 | 0.847 | 0.568 | 0 | 2 |       |
| XRCC6      | Activated NME1    |       |       |   |   |       |
| 0          | 0.639648693693526 | 0.938 | 0.722 | 0 | 2 |       |
| CHCHD2     | Activated NME1    |       |       |   |   |       |
| 0          | 0.63027765747603  | 0.887 | 0.619 | 0 | 2 | SNRPG |
|            | Activated NME1    |       |       |   |   |       |
| 0          | 0.621861364895447 | 0.837 | 0.586 | 0 | 2 |       |
| PTGES3     | Activated NME1    |       |       |   |   |       |
| 0          | 0.618989707398919 | 0.864 | 0.545 | 0 | 2 |       |
| TUBB       | Activated NME1    |       |       |   |   |       |
| 0          | 0.616016641988287 | 0.852 | 0.578 | 0 | 2 |       |
| PSMB3      | Activated NME1    |       |       |   |   |       |
| 0          | 0.615798150611332 | 0.827 | 0.538 | 0 | 2 |       |
| UQCRQ      | Activated NME1    |       |       |   |   |       |
| 0          | 0.615777128382085 | 0.863 | 0.614 | 0 | 2 |       |
| ATP5MD     | Activated NME1    |       |       |   |   |       |
| 0          | 0.615714187351679 | 0.857 | 0.58  | 0 | 2 |       |
| POMP       | Activated NME1    |       |       |   |   |       |
| 0          | 0.602309957524541 | 0.878 | 0.614 | 0 | 2 | ERH   |
|            | Activated NME1    |       |       |   |   |       |
| 0          | 0.565149998259701 | 0.999 | 0.974 | 0 | 2 |       |
| RPS24      | Activated NME1    |       |       |   |   |       |
| 0          | 0.561735263541512 | 0.881 | 0.615 | 0 | 2 |       |
| HNRNPM     | Activated NME1    |       |       |   |   |       |
| 0          | 0.543633893687697 | 0.992 | 0.92  | 0 | 2 |       |
| HNRNPA1    | Activated NME1    |       |       |   |   |       |

|                       |                    |        |                |       |       |       |
|-----------------------|--------------------|--------|----------------|-------|-------|-------|
| 0                     | 0.538798682991414  | 0.985  | 0.885          | 0     | 2     |       |
| PPIA                  | Activated NME1     |        |                |       |       |       |
| 0                     | 0.510653605645595  | 0.926  | 0.637          | 0     | 2     |       |
| TUBA1B                | Activated NME1     |        |                |       |       |       |
| 0                     | 0.417628941296528  | 1      | 0.987          | 0     | 2     |       |
| RPLP0                 | Activated NME1     |        |                |       |       |       |
| 0                     | 0.383350560923144  | 0.967  | 0.785          | 0     | 2     |       |
| RPS26                 | Activated NME1     |        |                |       |       |       |
| 0                     | 0.377475224593746  | 1      | 0.992          | 0     | 2     |       |
| RPL35                 | Activated NME1     |        |                |       |       |       |
| 0                     | 0.372381563519448  | 0.999  | 0.979          | 0     | 2     |       |
| RPL5                  | Activated NME1     |        |                |       |       |       |
| 0                     | 0.36332726495773   | 0.999  | 0.985          | 0     | 2     | RPL14 |
|                       | Activated NME1     |        |                |       |       |       |
| 0                     | -0.824529324954662 | 0.876  | 0.954          | 0     | 2     |       |
| HLA-DRA               | Activated NME1     |        |                |       |       |       |
| 0                     | -0.891889239019266 | 0.982  | 0.99           | 0     | 2     |       |
| CD74                  | Activated NME1     |        |                |       |       |       |
| 0                     | -0.973130092922331 | 0.998  | 0.998          | 0     | 2     |       |
| TMSB4X                | Activated NME1     |        |                |       |       |       |
| 0                     | -1.01876906224984  | 0.619  | 0.794          | 0     | 2     |       |
| ARHGDIB               | Activated NME1     |        |                |       |       |       |
| 0                     | -1.04979602631778  | 0.281  | 0.541          | 0     | 2     |       |
| LSP1                  | Activated NME1     |        |                |       |       |       |
| 0                     | -1.05111301682946  | 0.742  | 0.882          | 0     | 2     |       |
| CD52                  | Activated NME1     |        |                |       |       |       |
| 0                     | -1.20486265962847  | 0.072  | 0.329          | 0     | 2     |       |
| CD27                  | Activated NME1     |        |                |       |       |       |
| 0                     | -1.27677952486064  | 0.559  | 0.772          | 0     | 2     |       |
| CXCR4                 | Activated NME1     |        |                |       |       |       |
| 0                     | -1.39800507435322  | 0.565  | 0.826          | 0     | 2     |       |
| LAPTM5                | Activated NME1     |        |                |       |       |       |
| 0                     | -1.49232031505862  | 0.502  | 0.805          | 0     | 2     |       |
| HLA-DPB1              | Activated NME1     |        |                |       |       |       |
| 0                     | -1.49783865656607  | 0.244  | 0.566          | 0     | 2     |       |
| ISG20                 | Activated NME1     |        |                |       |       |       |
| 0                     | -2.34804241329546  | 0.146  | 0.527          | 0     | 2     | LTB   |
|                       | Activated NME1     |        |                |       |       |       |
| 0                     | -2.45931013049873  | 0.191  | 0.427          | 0     | 2     |       |
| JCHAIN                | Activated NME1     |        |                |       |       |       |
| 4.94065645841247e-324 | 0.675366568376515  |        |                | 0.568 | 0.285 |       |
| 8.80869639970358e-320 | 2                  | STOML2 | Activated NME1 |       |       |       |
| 1.48219693752374e-323 | 0.671803806945551  |        |                | 0.54  | 0.253 |       |
| 2.64260891991108e-319 | 2                  | PSMD14 | Activated NME1 |       |       |       |
| 6.32404026676796e-322 | 0.644324764726917  |        |                | 0.662 | 0.37  |       |
| 1.12751313916206e-317 | 2                  | PSMA3  | Activated NME1 |       |       |       |
| 1.80729213248728e-320 | 0.430282725105352  |        |                | 0.997 | 0.961 |       |
| 3.22222114301157e-316 | 2                  | EIF1   | Activated NME1 |       |       |       |
| 6.75032010599978e-319 | 0.677900726978687  |        |                | 0.379 | 0.123 |       |
| 1.2035145716987e-314  | 2                  | TSEN15 | Activated NME1 |       |       |       |



|                       |                           |       |       |
|-----------------------|---------------------------|-------|-------|
| 7.58331478488812e-319 | 0.621451921727891         | 0.653 | 0.362 |
| 1.3520291929977e-314  | 2 EIF5A Activated NME1    |       |       |
| 2.02594772883978e-314 | 0.717096432313836         | 0.561 | 0.248 |
| 3.61206220574845e-310 | 2 WARS Activated NME1     |       |       |
| 7.9640260711553e-314  | 0.520418030185214         | 0.907 | 0.678 |
| 1.41990620822628e-309 | 2 ELOB Activated NME1     |       |       |
| 6.22829453397428e-312 | 0.661393945060384         | 0.56  | 0.264 |
| 1.11044263246227e-307 | 2 SSRP1 Activated NME1    |       |       |
| 6.90554200977621e-311 | 0.595629656443575         | 0.759 | 0.476 |
| 1.231189084923e-306   | 2 EIF3I Activated NME1    |       |       |
| 8.51638627463805e-309 | 0.661278093418063         | 0.425 | 0.152 |
| 1.51838650890522e-304 | 2 ABCE1 Activated NME1    |       |       |
| 2.22643675954777e-307 | 0.610944203169549         | 0.78  | 0.504 |
| 3.96951409859772e-303 | 2 GHITM Activated NME1    |       |       |
| 4.05094059265257e-305 | 0.578731263328223         | 0.294 | 0.08  |
| 7.22242198264027e-301 | 2 BOP1 Activated NME1     |       |       |
| 1.29251682909028e-302 | 0.65921866976795          | 0.378 | 0.127 |
| 2.30442825458506e-298 | 2 PPAN Activated NME1     |       |       |
| 2.13809790572675e-300 | -1.07355453103392         | 0.272 | 0.513 |
| 3.81201475612023e-296 | 2 UCP2 Activated NME1     |       |       |
| 2.5193502992437e-298  | 0.562013986834364         | 0.812 | 0.538 |
| 4.49174964852159e-294 | 2 SNRPB Activated NME1    |       |       |
| 9.49981701725848e-297 | 0.602383912529793         | 0.801 | 0.555 |
| 1.69372237600701e-292 | 2 LDHB Activated NME1     |       |       |
| 2.53344097307704e-296 | 0.658590742162609         | 0.523 | 0.247 |
| 4.51687191089906e-292 | 2 NDUFAF8 Activated NME1  |       |       |
| 1.8888487917155e-294  | 0.615289362054063         | 0.665 | 0.373 |
| 3.36762851074957e-290 | 2 PSMC5 Activated NME1    |       |       |
| 2.04633785584505e-294 | 0.608682489179639         | 0.673 | 0.392 |
| 3.64841576318614e-290 | 2 TOMM22 Activated NME1   |       |       |
| 5.95391831362088e-293 | 0.592432045118456         | 0.681 | 0.401 |
| 1.06152409613547e-288 | 2 DNAJA1 Activated NME1   |       |       |
| 6.9933652494451e-293  | -0.432914988015512        | 1     | 1     |
| 1.24684709032357e-288 | 2 RPS27 Activated NME1    |       |       |
| 1.53952127443916e-292 | 0.669379641705498         | 0.485 | 0.207 |
| 2.74481248019757e-288 | 2 EIF4A1 Activated NME1   |       |       |
| 3.31710343591112e-292 | 0.540673338562522         | 0.834 | 0.575 |
| 5.91406371588594e-288 | 2 PSMA2 Activated NME1    |       |       |
| 5.49103089098344e-292 | 0.666719682928853         | 0.647 | 0.363 |
| 9.78995897553437e-288 | 2 ARPC5L Activated NME1   |       |       |
| 1.20052598726048e-290 | 0.621797426150929         | 0.653 | 0.354 |
| 2.14041778268671e-286 | 2 C19orf70 Activated NME1 |       |       |
| 5.47916979623595e-290 | 0.621345888869063         | 0.632 | 0.361 |
| 9.76881182970907e-286 | 2 NDUFS6 Activated NME1   |       |       |
| 3.42440221217148e-289 | 0.657960202702288         | 0.542 | 0.262 |
| 6.10536670408053e-285 | 2 DCTPP1 Activated NME1   |       |       |
| 1.63445935807908e-288 | 0.624238822064993         | 0.708 | 0.428 |
| 2.91407758951918e-284 | 2 DDX18 Activated NME1    |       |       |
| 4.58373020469496e-287 | 0.590719188532685         | 0.702 | 0.423 |
| 8.17233258195064e-283 | 2 NDUFB9 Activated NME1   |       |       |

|                       |                           |            |       |
|-----------------------|---------------------------|------------|-------|
| 1.43575319235698e-286 | 0.621387822448013         | 0.603      | 0.32  |
| 2.55980436665326e-282 | 2 CYC1 Activated NME1     |            |       |
| 1.65539008074234e-286 | 0.616670482702222         | 0.621      | 0.343 |
| 2.95139497495551e-282 | 2 PSMD7 Activated NME1    |            |       |
| 2.31841402910831e-285 | 0.629816068655396         | 0.568      | 0.289 |
| 4.13350037249721e-281 | 2 TCP1 Activated NME1     |            |       |
| 1.68189433790147e-284 | 0.516661567876963         | 0.856      | 0.594 |
| 2.99864941504453e-280 | 2 SUB1 Activated NME1     |            |       |
| 6.91718741483989e-284 | 0.639505979456489         | 0.37       | 0.126 |
| 1.2332653441918e-279  | 2 PUM3 Activated NME1     |            |       |
| 1.7991980176655e-283  | 0.386060043221747         | 0.989      | 0.916 |
| 3.20779014569582e-279 | 2 BTF3 Activated NME1     |            |       |
| 4.13995392995005e-283 | 0.375431149676978         | 0.995      | 0.965 |
| 7.38112386170795e-279 | 2 RPS17 Activated NME1    |            |       |
| 1.23267987781575e-282 | 0.666304200991016         | 0.423      | 0.16  |
| 2.19774495415771e-278 | 2 WDR43 Activated NME1    |            |       |
| 2.87199602601135e-282 | 0.675693273659541         | 0.486      | 0.204 |
| 5.12048171477564e-278 | 2 TARS Activated NME1     |            |       |
| 1.70314981827605e-281 | 0.640327613620534         | 0.43       | 0.17  |
| 3.03654581100437e-277 | 2 GTPBP4 Activated NME1   |            |       |
| 8.43420014524248e-278 | 0.567900003104092         | 0.727      | 0.458 |
| 1.50373354389528e-273 | 2 GTF3A Activated NME1    |            |       |
| 2.42207169726773e-277 | 0.63390818494279          | 0.478 0.21 |       |
| 4.31831162905863e-273 | 2 NIFK Activated NME1     |            |       |
| 6.15296395900539e-275 | 0.580640283002239         | 0.713      | 0.442 |
| 1.09701194425107e-270 | 2 SNRPF Activated NME1    |            |       |
| 5.11118485698164e-274 | -1.43056820570014         | 0.035      | 0.225 |
| 9.11273148151257e-270 | 2 RGS13 Activated NME1    |            |       |
| 5.5122745285188e-274  | 0.566908704086416         | 0.692      | 0.419 |
| 9.82783425689617e-270 | 2 PSMB7 Activated NME1    |            |       |
| 6.28756679736675e-273 | 0.572117540886256         | 0.642      | 0.368 |
| 1.12101028430252e-268 | 2 NDUFAB1 Activated NME1  |            |       |
| 1.25223235633137e-272 | 0.581753487038394         | 0.707      | 0.429 |
| 2.23260506810319e-268 | 2 SFPQ Activated NME1     |            |       |
| 1.87038908259937e-272 | 0.602362796364589         | 0.586      | 0.313 |
| 3.33471669536642e-268 | 2 STRAP Activated NME1    |            |       |
| 1.10646800195806e-269 | -0.77008816170024         | 0.704      | 0.827 |
| 1.97272180069102e-265 | 2 HLA-DPA1 Activated NME1 |            |       |
| 4.05123180065636e-269 | 0.601600156103492         | 0.581      | 0.304 |
| 7.22294117739022e-265 | 2 PDAP1 Activated NME1    |            |       |
| 2.06607280585514e-268 | 0.488790516993324         | 0.832      | 0.556 |
| 3.68360120555912e-264 | 2 ANP32B Activated NME1   |            |       |
| 6.17717202682639e-267 | 0.506074292487382         | 0.222      | 0.047 |
| 1.10132800066288e-262 | 2 METTL1 Activated NME1   |            |       |
| 1.98798319954205e-266 | 0.526253897637691         | 0.218      | 0.037 |
| 3.54437524646351e-262 | 2 CCND2 Activated NME1    |            |       |
| 3.56963340345537e-266 | 0.585229364006833         | 0.658      | 0.38  |
| 6.36429939502058e-262 | 2 BANF1 Activated NME1    |            |       |
| 1.60003821725224e-265 | 0.578864932523976         | 0.665      | 0.383 |
| 2.85270813753901e-261 | 2 HNRNPR Activated NME1   |            |       |

|                       |                          |       |       |
|-----------------------|--------------------------|-------|-------|
| 2.36541487256783e-265 | 0.613838307699162        | 0.45  | 0.192 |
| 4.21729817630118e-261 | 2 WDR46 Activated NME1   |       |       |
| 9.79706787369737e-265 | 0.585471411626857        | 0.319 | 0.099 |
| 1.7467192312015e-260  | 2 PAK1IP1 Activated NME1 |       |       |
| 2.37106750393478e-264 | 0.516718222677419        | 0.792 | 0.534 |
| 4.22737625276531e-260 | 2 ATP5PF Activated NME1  |       |       |
| 7.22331414800339e-263 | 0.578714210030648        | 0.383 | 0.139 |
| 1.28784467944753e-258 | 2 MRPL24 Activated NME1  |       |       |
| 9.97944272946049e-263 | 0.544043331574106        | 0.717 | 0.428 |
| 1.77923484423551e-258 | 2 LSM5 Activated NME1    |       |       |
| 2.42029182255239e-262 | 0.560074163520036        | 0.726 | 0.449 |
| 4.31513829042866e-258 | 2 FUS Activated NME1     |       |       |
| 5.13455308388035e-262 | 0.596343442881314        | 0.821 | 0.587 |
| 9.15439469325027e-258 | 2 RSL24D1 Activated NME1 |       |       |
| 5.36512987381659e-262 | -0.833791374460375       | 0.75  | 0.858 |
| 9.56549005202759e-258 | 2 CD37 Activated NME1    |       |       |
| 2.18114550011556e-261 | 0.590045489314274        | 0.675 | 0.402 |
| 3.88876431215603e-257 | 2 NSA2 Activated NME1    |       |       |
| 4.36088743036017e-258 | 0.550635839981822        | 0.309 | 0.096 |
| 7.77502619958914e-254 | 2 LYAR Activated NME1    |       |       |
| 6.76932318602688e-258 | -1.03626834400097        | 0.151 | 0.37  |
| 1.20690263083673e-253 | 2 S100A10 Activated NME1 |       |       |
| 7.09866361292745e-258 | 0.545513684548542        | 0.791 | 0.547 |
| 1.26562073554883e-253 | 2 RBM8A Activated NME1   |       |       |
| 1.63032711171142e-257 | 0.514089992211341        | 0.762 | 0.492 |
| 2.90671020747029e-253 | 2 PSMB6 Activated NME1   |       |       |
| 5.3900567924133e-256  | 0.505270445043175        | 0.822 | 0.573 |
| 9.60993225519367e-252 | 2 SEC61B Activated NME1  |       |       |
| 3.04809138518356e-254 | 0.568951399223238        | 0.694 | 0.418 |
| 5.43444213064376e-250 | 2 FBL Activated NME1     |       |       |
| 4.20198987232743e-254 | 0.48103526800669         | 0.846 | 0.592 |
| 7.49172774337258e-250 | 2 NDUFA13 Activated NME1 |       |       |
| 5.41222111163023e-254 | 0.627740912878431        | 0.499 | 0.229 |
| 9.64944901992554e-250 | 2 NARS Activated NME1    |       |       |
| 2.18089150383759e-253 | 0.584834288661424        | 0.401 | 0.155 |
| 3.88831146219204e-249 | 2 DNPEP Activated NME1   |       |       |
| 2.32848864598206e-253 | 0.502815316149379        | 0.996 | 0.974 |
| 4.15146240692141e-249 | 2 FTH1 Activated NME1    |       |       |
| 2.66628429291758e-252 | 0.589745920647046        | 0.435 | 0.194 |
| 4.75371826584275e-248 | 2 PSMD1 Activated NME1   |       |       |
| 3.55503590663833e-252 | -0.634889914454038       | 0.977 | 0.986 |
| 6.33827351794548e-248 | 2 TMSB10 Activated NME1  |       |       |
| 7.65251481906492e-252 | 0.450839705292803        | 0.862 | 0.616 |
| 1.36436686709108e-247 | 2 ATP5MF Activated NME1  |       |       |
| 5.61227518755049e-250 | 0.600648798441241        | 0.391 | 0.148 |
| 1.00061254318838e-245 | 2 TIMM44 Activated NME1  |       |       |
| 9.92350304720974e-250 | 0.37621504432312         | 0.979 | 0.893 |
| 1.76926135828702e-245 | 2 COX7C Activated NME1   |       |       |
| 1.05846814940918e-248 | 0.55181587166358         | 0.627 | 0.359 |
| 1.88714286358163e-244 | 2 SNRPC Activated NME1   |       |       |

|                       |                    |         |                |       |
|-----------------------|--------------------|---------|----------------|-------|
| 1.77344929543379e-248 | 0.58422791973225   | 0.461   | 0.212          |       |
| 3.1618827488289e-244  | 2                  | STIP1   | Activated NME1 |       |
| 5.81334158596469e-248 | 0.522681310050269  |         | 0.746          | 0.484 |
| 1.03646067136164e-243 | 2                  | PSMD8   | Activated NME1 |       |
| 7.80388880309672e-247 | 0.55997899560386   | 0.625   | 0.356          |       |
| 1.39135533470411e-242 | 2                  | TXNL1   | Activated NME1 |       |
| 8.72514244900826e-247 | 0.62125664526134   | 0.599   | 0.329          |       |
| 1.55560564723368e-242 | 2                  | SARS    | Activated NME1 |       |
| 1.97456676113094e-246 | 0.568208916134882  |         | 0.367          | 0.144 |
| 3.52045507842035e-242 | 2                  | ETF1    | Activated NME1 |       |
| 3.48238152835227e-246 | 0.551986925346462  |         | 0.644          | 0.378 |
| 6.20873802689925e-242 | 2                  | PSMB2   | Activated NME1 |       |
| 3.81369133427512e-246 | 0.588925044559497  |         | 0.461          | 0.211 |
| 6.79943027987911e-242 | 2                  | EIF2S1  | Activated NME1 |       |
| 8.14625993261637e-246 | 0.511636787092796  |         | 0.738          | 0.471 |
| 1.45239668338617e-241 | 2                  | COX5A   | Activated NME1 |       |
| 1.5046707737494e-245  | -0.861782643564267 |         | 0.105          | 0.303 |
| 2.6826775225178e-241  | 2                  | GNG7    | Activated NME1 |       |
| 5.48975676373381e-244 | 0.572434995321911  |         | 0.367          | 0.135 |
| 9.787687334061e-240   | 2                  | TRMT1   | Activated NME1 |       |
| 1.1355179672113e-242  | -0.608233963764627 |         | 1              | 1     |
| 2.02451498374102e-238 | 2                  | MALAT1  | Activated NME1 |       |
| 5.2730823186684e-241  | 0.584302045909985  |         | 0.495          | 0.252 |
| 9.4013784659539e-237  | 2                  | ATOX1   | Activated NME1 |       |
| 1.87362273937931e-239 | 0.556007556051223  |         | 0.581          | 0.318 |
| 3.34048198203938e-235 | 2                  | PSMC4   | Activated NME1 |       |
| 3.27364723842144e-239 | 0.558322398183632  |         | 0.508          | 0.258 |
| 5.83658566138159e-235 | 2                  | MRPS7   | Activated NME1 |       |
| 4.57844830240235e-239 | 0.572346391531289  |         | 0.497          | 0.249 |
| 8.16291547835314e-235 | 2                  | NAA10   | Activated NME1 |       |
| 6.73603859034725e-239 | 0.595528203699288  |         | 0.305          | 0.106 |
| 1.20096832027301e-234 | 2                  | SLC1A5  | Activated NME1 |       |
| 8.15930685494297e-239 | 0.480302978876023  |         | 0.857          | 0.63  |
| 1.45472281916778e-234 | 2                  | UBE2D3  | Activated NME1 |       |
| 1.66216855204966e-238 | 0.522618871809093  |         | 0.673          | 0.407 |
| 2.96348031144933e-234 | 2                  | NDUFB7  | Activated NME1 |       |
| 4.73910827152842e-238 | 0.565240567854008  |         | 0.423          | 0.201 |
| 8.44935613730801e-234 | 2                  | PSMB5   | Activated NME1 |       |
| 1.07638675821058e-237 | 0.442272614939369  |         | 0.819          | 0.579 |
| 1.91908995121364e-233 | 2                  | LSM7    | Activated NME1 |       |
| 1.17457051083487e-237 | 0.583170910642691  |         | 0.483          | 0.236 |
| 2.09414176376749e-233 | 2                  | AK6     | Activated NME1 |       |
| 2.35212801540709e-237 | 0.556060039919494  |         | 0.439          | 0.19  |
| 4.1936090386693e-233  | 2                  | EMG1    | Activated NME1 |       |
| 1.52145269295741e-236 | -0.771944433294592 |         | 0.055          | 0.237 |
| 2.71259800627377e-232 | 2                  | LY86    | Activated NME1 |       |
| 6.58145685693138e-236 | 0.451463605078593  |         | 0.88           | 0.655 |
| 1.1734079430223e-231  | 2                  | HNRNPA3 | Activated NME1 |       |
| 1.87028708501233e-235 | 0.439171667357786  |         | 0.811          | 0.559 |
| 3.33453484386848e-231 | 2                  | ATP5MC3 | Activated NME1 |       |

|                       |                          |       |       |
|-----------------------|--------------------------|-------|-------|
| 6.16660032485176e-235 | 0.414129414940859        | 0.898 | 0.686 |
| 1.09944317191782e-230 | 2 NDUFA4 Activated NME1  |       |       |
| 1.76802879914622e-234 | 0.550873532227108        | 0.605 | 0.341 |
| 3.15221854599779e-230 | 2 CACYBP Activated NME1  |       |       |
| 9.72527496419103e-234 | 0.452536718875392        | 0.852 | 0.613 |
| 1.73391927336562e-229 | 2 SET Activated NME1     |       |       |
| 1.94647029759596e-233 | 0.342425811886018        | 0.989 | 0.939 |
| 3.47036189358384e-229 | 2 NACA Activated NME1    |       |       |
| 5.26016080566552e-233 | 0.566760031884987        | 0.415 | 0.168 |
| 9.37834070042106e-229 | 2 WDR74 Activated NME1   |       |       |
| 1.41314926929007e-232 | 0.626811810994002        | 0.483 | 0.247 |
| 2.51950383221727e-228 | 2 SMS Activated NME1     |       |       |
| 1.04696143456143e-231 | 0.546238638570623        | 0.487 | 0.243 |
| 1.86662754167958e-227 | 2 PSMD3 Activated NME1   |       |       |
| 5.86718223252287e-231 | 0.535547557417129        | 0.702 | 0.451 |
| 1.0460599202365e-226  | 2 PRELID1 Activated NME1 |       |       |
| 2.56100323171377e-230 | 0.543468614846566        | 0.37  | 0.15  |
| 4.56601266182248e-226 | 2 RARS Activated NME1    |       |       |
| 2.56553726425276e-230 | -0.820180274907362       | 0.084 | 0.278 |
| 4.57409638843624e-226 | 2 SYNE2 Activated NME1   |       |       |
| 5.9737891724863e-229  | 0.508974620766818        | 0.665 | 0.393 |
| 1.06506687156258e-224 | 2 MAGOH Activated NME1   |       |       |
| 1.27249105439327e-228 | 0.461391267376158        | 0.849 | 0.622 |
| 2.26872430087776e-224 | 2 HNRNPC Activated NME1  |       |       |
| 1.44194755454278e-228 | 0.521542148415125        | 0.309 | 0.107 |
| 2.57084829499432e-224 | 2 GART Activated NME1    |       |       |
| 2.66268826713952e-228 | 0.532166160134619        | 0.307 | 0.098 |
| 4.74730691148306e-224 | 2 PN01 Activated NME1    |       |       |
| 1.01817642030629e-227 | 0.550438677897952        | 0.533 | 0.278 |
| 1.81530673976408e-223 | 2 KARS Activated NME1    |       |       |
| 3.72928973678227e-227 | -0.830705544745522       | 0.804 | 0.873 |
| 6.64895067170911e-223 | 2 CD79A Activated NME1   |       |       |
| 4.11972887915483e-227 | 0.499903176632615        | 0.717 | 0.465 |
| 7.34506461864514e-223 | 2 CCT8 Activated NME1    |       |       |
| 5.69441581447181e-226 | 0.546512703591976        | 0.497 | 0.248 |
| 1.01525739556218e-221 | 2 OLA1 Activated NME1    |       |       |
| 6.82834737326211e-225 | 0.536862762586695        | 0.493 | 0.238 |
| 1.2174260531789e-220  | 2 MRPL11 Activated NME1  |       |       |
| 1.09312825220731e-224 | 0.379195641458403        | 0.91  | 0.702 |
| 1.9489383608604e-220  | 2 COX6C Activated NME1   |       |       |
| 7.62381672526462e-224 | 0.534774745166876        | 0.558 | 0.306 |
| 1.35925028394743e-219 | 2 PSMD2 Activated NME1   |       |       |
| 7.64859447393617e-224 | 0.495736090729328        | 0.818 | 0.582 |
| 1.36366790875808e-219 | 2 RBM3 Activated NME1    |       |       |
| 3.73493411226763e-221 | 0.566246125336173        | 0.392 | 0.166 |
| 6.65901402876196e-217 | 2 YARS Activated NME1    |       |       |
| 3.7835057995444e-220  | 0.541850237482256        | 0.42  | 0.189 |
| 6.74561249000772e-216 | 2 PRPF19 Activated NME1  |       |       |
| 6.97825598939592e-220 | -1.05770619605377        | 0.11  | 0.292 |
| 1.2441532603494e-215  | 2 KLF2 Activated NME1    |       |       |

|                       |                           |             |       |
|-----------------------|---------------------------|-------------|-------|
| 3.57347574197848e-219 | 0.498600595403934         | 0.719       | 0.465 |
| 6.37114990037344e-215 | 2 MRPL52 Activated NME1   |             |       |
| 1.05921225731044e-218 | -0.573999675854641        | 0.013       | 0.154 |
| 1.88846953355879e-214 | 2 AIM2 Activated NME1     |             |       |
| 3.47235265384345e-218 | -1.38499944028732         | 0.115       | 0.28  |
| 6.19085754653748e-214 | 2 S100A4 Activated NME1   |             |       |
| 1.12916965108749e-217 | 0.545278323771966         | 0.371       | 0.162 |
| 2.01319657092388e-213 | 2 ZNF593 Activated NME1   |             |       |
| 2.56319598265993e-217 | -0.829121562970766        | 0.096       | 0.294 |
| 4.56992211748439e-213 | 2 NCF1 Activated NME1     |             |       |
| 4.63664111132366e-217 | 0.546168685735791         | 0.391       | 0.16  |
| 8.26666743737895e-213 | 2 TUBA1C Activated NME1   |             |       |
| 6.9975637779758e-216  | 0.527040541004794         | 0.578       | 0.329 |
| 1.24759564597531e-211 | 2 PHB2 Activated NME1     |             |       |
| 3.76342404740175e-215 | 0.40516018823313          | 0.181 0.035 |       |
| 6.70980873411258e-211 | 2 SLC38A5 Activated NME1  |             |       |
| 1.60600874054175e-213 | 0.419958126142859         | 0.875       | 0.662 |
| 2.86335298351188e-209 | 2 SLC25A3 Activated NME1  |             |       |
| 6.34503009607411e-213 | 0.503123979766079         | 0.274       | 0.087 |
| 1.13125541582905e-208 | 2 CD320 Activated NME1    |             |       |
| 7.08389750187233e-213 | 0.53612293095288          | 0.352 0.141 |       |
| 1.26298808560882e-208 | 2 PPP1R14B Activated NME1 |             |       |
| 8.72331051775681e-213 | 0.450206825719363         | 0.829       | 0.606 |
| 1.55527903221086e-208 | 2 ATP5F1B Activated NME1  |             |       |
| 1.18357398309833e-212 | 0.542690010692291         | 0.445       | 0.212 |
| 2.11019405446602e-208 | 2 BUD23 Activated NME1    |             |       |
| 1.26873333048426e-212 | 0.440384285621146         | 0.747       | 0.499 |
| 2.26202465492038e-208 | 2 FKBP1A Activated NME1   |             |       |
| 1.58751965284107e-212 | 0.509847465411363         | 0.648       | 0.395 |
| 2.83038878905034e-208 | 2 ADRM1 Activated NME1    |             |       |
| 2.09622580441094e-212 | 0.43297582722444          | 0.828 0.584 |       |
| 3.73736098668426e-208 | 2 POLR2L Activated NME1   |             |       |
| 1.0782988307227e-211  | 0.523046950823296         | 0.537       | 0.294 |
| 1.92249898529551e-207 | 2 GTF3C6 Activated NME1   |             |       |
| 3.03574726091838e-209 | 0.508293194195073         | 0.559       | 0.314 |
| 5.41243379149138e-205 | 2 EIF1AX Activated NME1   |             |       |
| 3.14755246874474e-209 | 0.507419570454098         | 0.624       | 0.378 |
| 5.61177129652500e-205 | 2 MDH2 Activated NME1     |             |       |
| 8.53039618194746e-209 | 0.553491102015108         | 0.458       | 0.234 |
| 1.52088433527941e-204 | 2 GSPT1 Activated NME1    |             |       |
| 9.72785311124845e-209 | 0.461539621051127         | 0.772       | 0.533 |
| 1.73437893120449e-204 | 2 PGK1 Activated NME1     |             |       |
| 1.36270822902875e-208 | 0.468592397387027         | 0.263       | 0.083 |
| 2.42957250153535e-204 | 2 FARSB Activated NME1    |             |       |
| 5.05191945810241e-208 | 0.512014472600794         | 0.416       | 0.188 |
| 9.00706720185078e-204 | 2 EEF1E1 Activated NME1   |             |       |
| 5.16151249761387e-208 | 0.460615261141469         | 0.747       | 0.509 |
| 9.20246063199577e-204 | 2 SNRPB2 Activated NME1   |             |       |
| 7.1694799870299e-208  | -0.832590138686893        | 0.667       | 0.773 |
| 1.27824658688756e-203 | 2 CYBA Activated NME1     |             |       |

|                       |                           |             |       |
|-----------------------|---------------------------|-------------|-------|
| 1.99096411937401e-207 | 0.484714648617145         | 0.305       | 0.111 |
| 3.54968992843192e-203 | 2 TIMM50 Activated NME1   |             |       |
| 6.90336597492599e-207 | 0.524821664925445         | 0.256       | 0.078 |
| 1.23080111966955e-202 | 2 STAT5A Activated NME1   |             |       |
| 2.03211208973045e-206 | -0.871016027398988        | 0.278       | 0.473 |
| 3.62305264478041e-202 | 2 PTPRC Activated NME1    |             |       |
| 6.97861706221788e-206 | 0.520214660281853         | 0.738       | 0.507 |
| 1.24421763602283e-201 | 2 SRSF7 Activated NME1    |             |       |
| 9.57551450339164e-206 | 0.48236171838016          | 0.661 0.416 |       |
| 1.70721848080969e-201 | 2 AURKAIP1 Activated NME1 |             |       |
| 3.17251262107833e-205 | 0.513986412686728         | 0.503       | 0.264 |
| 5.65627275212056e-201 | 2 PFDN6 Activated NME1    |             |       |
| 5.38217642889437e-205 | 0.484483792820251         | 0.264       | 0.083 |
| 9.59588235507577e-201 | 2 RRS1 Activated NME1     |             |       |
| 1.19116581293318e-203 | 0.378939651852524         | 0.879       | 0.663 |
| 2.12372952787857e-199 | 2 COX6A1 Activated NME1   |             |       |
| 2.02559700052383e-203 | 0.44521389944702          | 0.806 0.57  |       |
| 3.61143689223394e-199 | 2 HNRNPU Activated NME1   |             |       |
| 1.33391785616354e-202 | 0.526184376269157         | 0.363       | 0.144 |
| 2.37824214575397e-198 | 2 C8orf33 Activated NME1  |             |       |
| 3.40120705649764e-202 | 0.567456636463407         | 0.351       | 0.144 |
| 6.06401206102965e-198 | 2 NFKB1 Activated NME1    |             |       |
| 3.10432576412355e-201 | 0.400973667860977         | 0.778       | 0.53  |
| 5.53470240485587e-197 | 2 SEC61G Activated NME1   |             |       |
| 8.05739348550988e-201 | 0.541807749515053         | 0.464       | 0.228 |
| 1.43655268453156e-196 | 2 DNP1 Activated NME1     |             |       |
| 1.15667048882331e-200 | 0.487962947417656         | 0.316       | 0.116 |
| 2.06222781452308e-196 | 2 PES1 Activated NME1     |             |       |
| 1.41287053533256e-200 | 0.402064187516664         | 0.169       | 0.034 |
| 2.51900687744442e-196 | 2 RCN1 Activated NME1     |             |       |
| 1.69813691862075e-200 | 0.550875120784277         | 0.429       | 0.193 |
| 3.02760831220893e-196 | 2 NFKBIE Activated NME1   |             |       |
| 2.92342566339567e-200 | 0.554485051031376         | 0.333       | 0.126 |
| 5.21217561526813e-196 | 2 ARL8B Activated NME1    |             |       |
| 9.94151174061462e-200 | 0.484374370345589         | 0.822       | 0.587 |
| 1.77247212823418e-195 | 2 SYNGR2 Activated NME1   |             |       |
| 3.87359967103465e-199 | 0.519247628484514         | 0.416       | 0.191 |
| 6.90624085348768e-195 | 2 EPRS Activated NME1     |             |       |
| 5.92576961199311e-199 | 0.52493728184824          | 0.515 0.278 |       |
| 1.05650546412225e-194 | 2 POLR2I Activated NME1   |             |       |
| 6.07826622715273e-199 | 0.531004820804292         | 0.396       | 0.174 |
| 1.08369408563906e-194 | 2 MRPL1 Activated NME1    |             |       |
| 6.57025798233832e-199 | 0.472007668536379         | 0.597       | 0.326 |
| 1.1714112956711e-194  | 2 TUBB4B Activated NME1   |             |       |
| 1.18040102003866e-197 | 0.533715258068318         | 0.317       | 0.108 |
| 2.10453697862693e-193 | 2 CCDC58 Activated NME1   |             |       |
| 3.17761951113701e-197 | -0.652543179539252        | 0.024       | 0.176 |
| 5.66537782640618e-193 | 2 SUSD3 Activated NME1    |             |       |
| 1.56719490613749e-196 | 0.522091638213815         | 0.362       | 0.146 |
| 2.79415179815253e-192 | 2 SNHG15 Activated NME1   |             |       |

|                       |                           |             |       |
|-----------------------|---------------------------|-------------|-------|
| 2.22348777215502e-196 | -0.65723927624013         | 0.012       | 0.148 |
| 3.96425634897519e-192 | 2 NEIL1 Activated NME1    |             |       |
| 2.94272274711329e-196 | 0.480356011527562         | 0.572       | 0.329 |
| 5.24658038582828e-192 | 2 PSMD13 Activated NME1   |             |       |
| 1.49286062630245e-195 | 0.519041976705428         | 0.358       | 0.148 |
| 2.66162121063464e-191 | 2 MARS Activated NME1     |             |       |
| 2.12998473515813e-195 | 0.502591687401002         | 0.415       | 0.201 |
| 3.79754978431343e-191 | 2 MRPL4 Activated NME1    |             |       |
| 3.17417154103217e-195 | 0.48077692243371          | 0.305 0.123 |       |
| 5.65923044050626e-191 | 2 RUVBL1 Activated NME1   |             |       |
| 3.94289854706988e-195 | -0.771734143205224        | 0.06        | 0.223 |
| 7.02979381957088e-191 | 2 C16orf74 Activated NME1 |             |       |
| 1.57662360531923e-194 | -0.86749151367152         | 0.347       | 0.52  |
| 2.81096222592366e-190 | 2 TSC22D3 Activated NME1  |             |       |
| 2.99463869818313e-194 | 0.496001153889937         | 0.368       | 0.169 |
| 5.33914133499071e-190 | 2 RUVBL2 Activated NME1   |             |       |
| 3.28579264041722e-194 | 0.395542750737921         | 0.897       | 0.73  |
| 5.85823969859987e-190 | 2 SNRPD2 Activated NME1   |             |       |
| 1.60632787227948e-193 | 0.442257164129259         | 0.746       | 0.506 |
| 2.86392196348709e-189 | 2 JTB Activated NME1      |             |       |
| 1.61578002250523e-193 | 0.491536376953289         | 0.289       | 0.105 |
| 2.88077420212457e-189 | 2 ABCF2.1 Activated NME1  |             |       |
| 3.99202239264701e-193 | 0.581685766268553         | 0.408       | 0.186 |
| 7.11737672385036e-189 | 2 PIM3 Activated NME1     |             |       |
| 4.52812052028477e-193 | 0.449670360043023         | 0.237       | 0.072 |
| 8.07318607561572e-189 | 2 TSR1 Activated NME1     |             |       |
| 4.74203590720881e-193 | 0.361591196164646         | 0.929       | 0.76  |
| 8.45457581896258e-189 | 2 NAP1L1 Activated NME1   |             |       |
| 2.19225267981562e-191 | 0.477382475460418         | 0.281       | 0.103 |
| 3.90856730284328e-187 | 2 TRAP1 Activated NME1    |             |       |
| 1.3918370147585e-190  | -1.16805776107446         | 0.37        | 0.475 |
| 2.48150621361292e-186 | 2 S100A6 Activated NME1   |             |       |
| 1.58458948751566e-190 | 0.49447962247016          | 0.574 0.33  |       |
| 2.82516459729167e-186 | 2 KPNB1 Activated NME1    |             |       |
| 2.88243822009265e-190 | 0.513686805802168         | 0.562       | 0.33  |
| 5.13909910260318e-186 | 2 RWDD1 Activated NME1    |             |       |
| 3.0698351590717e-190  | 0.492082048069229         | 0.371       | 0.162 |
| 5.47320910510893e-186 | 2 AHCY Activated NME1     |             |       |
| 4.44459195085016e-190 | 0.494427723353958         | 0.512       | 0.279 |
| 7.92426298917076e-186 | 2 AHSA1 Activated NME1    |             |       |
| 1.12001311993057e-189 | 0.489981810227019         | 0.491       | 0.264 |
| 1.99687139152422e-185 | 2 MRPS15 Activated NME1   |             |       |
| 1.89754889132602e-189 | 0.509779803197342         | 0.415       | 0.186 |
| 3.38313991834517e-185 | 2 LARS Activated NME1     |             |       |
| 1.97082594551879e-189 | 0.539010905304872         | 0.387       | 0.175 |
| 3.51378557826545e-185 | 2 AARS Activated NME1     |             |       |
| 1.38310032589951e-188 | -0.880818003832514        | 0.145       | 0.32  |
| 2.46592957104624e-184 | 2 ZFP36L2 Activated NME1  |             |       |
| 5.81128628849752e-188 | 0.522040249387959         | 0.466       | 0.229 |
| 1.03609423237622e-183 | 2 RRP7A Activated NME1    |             |       |



|                       |                           |             |       |
|-----------------------|---------------------------|-------------|-------|
| 1.04400215845049e-187 | 0.456468126065516         | 0.257       | 0.089 |
| 1.86135144830138e-183 | 2 AIMP2 Activated NME1    |             |       |
| 1.4048555846899e-187  | 0.403542681225304         | 0.182       | 0.044 |
| 2.50471702194363e-183 | 2 BCAT1 Activated NME1    |             |       |
| 1.82618140516443e-183 | 0.507845525443912         | 0.438       | 0.201 |
| 3.25589882726766e-179 | 2 TMEM109 Activated NME1  |             |       |
| 3.01788221424978e-183 | -1.09427146387367         | 0.212       | 0.389 |
| 5.38058219978594e-179 | 2 SELL Activated NME1     |             |       |
| 3.38091744058251e-183 | 0.48797440394656          | 0.373 0.172 |       |
| 6.02783770481455e-179 | 2 CCDC124 Activated NME1  |             |       |
| 9.93784714884575e-183 | -0.953081135995441        | 0.356       | 0.513 |
| 1.77181876816771e-178 | 2 SAT1 Activated NME1     |             |       |
| 1.27761837013837e-182 | 0.459102081436798         | 0.298       | 0.118 |
| 2.27786579211969e-178 | 2 RRP1 Activated NME1     |             |       |
| 2.54361846591513e-182 | -0.844067993210201        | 0.168       | 0.349 |
| 4.53501736288008e-178 | 2 RIPOR2 Activated NME1   |             |       |
| 4.58015392340696e-182 | 0.436229016421751         | 0.744       | 0.51  |
| 8.16595643004227e-178 | 2 SOD1 Activated NME1     |             |       |
| 4.98617262103314e-182 | 0.420639707653227         | 0.226       | 0.07  |
| 8.88984716603999e-178 | 2 POLR3H Activated NME1   |             |       |
| 8.16857124414168e-182 | 0.478014556084909         | 0.559       | 0.325 |
| 1.45637456711802e-177 | 2 ZC3H15 Activated NME1   |             |       |
| 8.62851605915577e-182 | 0.471062771246115         | 0.537       | 0.301 |
| 1.53837812818688e-177 | 2 PUF60 Activated NME1    |             |       |
| 4.6450077649187e-181  | 0.464470086817706         | 0.287       | 0.116 |
| 8.28158434407355e-177 | 2 EXOSC4 Activated NME1   |             |       |
| 3.40609095015834e-180 | 0.435523450575833         | 0.754       | 0.534 |
| 6.07271955503731e-176 | 2 SNU13 Activated NME1    |             |       |
| 1.58969709100118e-179 | 0.501959675259477         | 0.431       | 0.217 |
| 2.834270943546e-175   | 2 HNRNPAB Activated NME1  |             |       |
| 4.3657465523743e-179  | 0.460970895501972         | 0.479       | 0.253 |
| 7.78368952822814e-175 | 2 MRPL47 Activated NME1   |             |       |
| 1.49192483436141e-178 | 0.439485931519137         | 0.28        | 0.105 |
| 2.65995278718297e-174 | 2 HSPBP1 Activated NME1   |             |       |
| 3.03402695113108e-178 | 0.502985858915227         | 0.476       | 0.247 |
| 5.4093666511716e-174  | 2 TIMM10 Activated NME1   |             |       |
| 3.32996085361214e-178 | 0.476947513114582         | 0.597       | 0.367 |
| 5.93698720590509e-174 | 2 NOL7 Activated NME1     |             |       |
| 9.35039028017453e-178 | 0.479248157280206         | 0.502       | 0.272 |
| 1.66708108305232e-173 | 2 ILF3 Activated NME1     |             |       |
| 1.23716931219428e-177 | 0.489692783926198         | 0.497       | 0.265 |
| 2.20574916671119e-173 | 2 AIMP1 Activated NME1    |             |       |
| 3.74650147602246e-177 | 0.471524425827328         | 0.399       | 0.192 |
| 6.67963748160045e-173 | 2 SLC25A39 Activated NME1 |             |       |
| 1.05069417321218e-176 | -1.1956681620059          | 0.084 0.219 |       |
| 1.87328264142e-172    | 2 LGALS1 Activated NME1   |             |       |
| 1.411856501208e-176   | 0.519933481932681         | 0.513       | 0.286 |
| 2.51719895600374e-172 | 2 CALR Activated NME1     |             |       |
| 5.23593374740829e-176 | -0.877760104668125        | 0.626       | 0.701 |
| 9.33514627825425e-172 | 2 EZR Activated NME1      |             |       |

|                       |                           |       |       |
|-----------------------|---------------------------|-------|-------|
| 1.45536187062565e-175 | 0.444961810145168         | 0.641 | 0.392 |
| 2.59476467913846e-171 | 2 DDX39A Activated NME1   |       |       |
| 2.03458219980299e-175 | 0.463610856068333         | 0.548 | 0.324 |
| 3.62745660402876e-171 | 2 ABRACL Activated NME1   |       |       |
| 3.20810393185161e-175 | 0.480557495420426         | 0.426 | 0.216 |
| 5.71972850009823e-171 | 2 MRPL21 Activated NME1   |       |       |
| 1.14394836386909e-172 | 0.467890519670256         | 0.338 | 0.133 |
| 2.03954553794221e-168 | 2 RRP15 Activated NME1    |       |       |
| 1.57398428526867e-172 | 0.356726703225274         | 0.857 | 0.654 |
| 2.80625658220551e-168 | 2 ATP5ME Activated NME1   |       |       |
| 1.79318750237914e-172 | 0.433708000929897         | 0.541 | 0.315 |
| 3.19707399799177e-168 | 2 HSD17B10 Activated NME1 |       |       |
| 7.13895780958955e-172 | 0.434344082402266         | 0.72  | 0.494 |
| 1.27280478787172e-167 | 2 EIF3G Activated NME1    |       |       |
| 1.06572438724602e-171 | 0.466741731004999         | 0.324 | 0.144 |
| 1.90008001002092e-167 | 2 DCUN1D5 Activated NME1  |       |       |
| 1.40121202607739e-171 | 0.447029494647342         | 0.633 | 0.405 |
| 2.49822092129338e-167 | 2 MINOS1 Activated NME1   |       |       |
| 1.71678152570437e-171 | 0.4889717071743           | 0.453 | 0.243 |
| 3.06084978217832e-167 | 2 SYNCRIP Activated NME1  |       |       |
| 1.18576487226239e-170 | 0.4832787807212           | 0.499 | 0.282 |
| 2.11410019075661e-166 | 2 GLRX3 Activated NME1    |       |       |
| 1.43178579663982e-170 | 0.472445392092869         | 0.429 | 0.219 |
| 2.55273089682913e-166 | 2 DDX1 Activated NME1     |       |       |
| 3.15454697362758e-170 | 0.378137909868588         | 0.193 | 0.052 |
| 5.62424179928061e-166 | 2 WDR12 Activated NME1    |       |       |
| 5.42946247040839e-170 | 0.450324241625527         | 0.648 | 0.423 |
| 9.68018863849112e-166 | 2 PGAM1 Activated NME1    |       |       |
| 7.35450818371758e-170 | 0.42056188607868          | 0.26  | 0.095 |
| 1.31123526407501e-165 | 2 PRMT5 Activated NME1    |       |       |
| 1.55272870539338e-168 | 0.450325263997756         | 0.463 | 0.245 |
| 2.76836000884586e-164 | 2 MRPS12 Activated NME1   |       |       |
| 3.20963982325326e-168 | 0.475031180310024         | 0.445 | 0.226 |
| 5.72246684087824e-164 | 2 EXOSC8 Activated NME1   |       |       |
| 3.47888618424617e-168 | 0.473179718915792         | 0.408 | 0.192 |
| 6.20250617789249e-164 | 2 COX20 Activated NME1    |       |       |
| 4.17241398192541e-168 | 0.439131478125019         | 0.538 | 0.31  |
| 7.43899688837482e-164 | 2 LSM2 Activated NME1     |       |       |
| 1.12896629044616e-167 | 0.431340582857247         | 0.662 | 0.433 |
| 2.01283399923645e-163 | 2 PSMD4 Activated NME1    |       |       |
| 1.77078723756475e-167 | 0.46659203212384          | 0.539 | 0.315 |
| 3.15713656585419e-163 | 2 BUD31 Activated NME1    |       |       |
| 4.20510714470406e-167 | -0.732871259021332        | 0.026 | 0.162 |
| 7.49728552829288e-163 | 2 BIK Activated NME1      |       |       |
| 4.56963576380658e-167 | 0.457531689821473         | 0.419 | 0.206 |
| 8.14720360329075e-163 | 2 FUBP1 Activated NME1    |       |       |
| 1.75175244305199e-166 | 0.469293918363466         | 0.569 | 0.346 |
| 3.12319943071739e-162 | 2 PFDN2 Activated NME1    |       |       |
| 2.03916970992765e-166 | -0.691350162170547        | 0.78  | 0.865 |
| 3.63563567583002e-162 | 2 CD79B Activated NME1    |       |       |

|                       |                           |       |       |
|-----------------------|---------------------------|-------|-------|
| 2.34625739696064e-166 | 0.457425528355832         | 0.303 | 0.125 |
| 4.18314231304113e-162 | 2 NIP7 Activated NME1     |       |       |
| 2.60936314604653e-166 | -0.627090470285462        | 0.051 | 0.202 |
| 4.65223355308635e-162 | 2 HLA-D0B Activated NME1  |       |       |
| 7.49122700302015e-166 | 0.442630738708144         | 0.277 | 0.108 |
| 1.33561086236846e-161 | 2 BZW2 Activated NME1     |       |       |
| 1.59962967436614e-165 | 0.360221390014962         | 0.828 | 0.628 |
| 2.85197974642739e-161 | 2 UQCR11 Activated NME1   |       |       |
| 3.82818412713102e-165 | 0.3870735390946           | 0.789 | 0.572 |
| 6.82526948026189e-161 | 2 ATP5F1D Activated NME1  |       |       |
| 2.43111824825641e-163 | 0.466515231042623         | 0.423 | 0.226 |
| 4.33444072481635e-159 | 2 AK2 Activated NME1      |       |       |
| 3.41876199576542e-163 | 0.371828121348437         | 0.785 | 0.562 |
| 6.09531076225016e-159 | 2 NDUFB2 Activated NME1   |       |       |
| 4.516539229678e-163   | 0.456013974426705         | 0.371 | 0.173 |
| 8.0525377925929e-159  | 2 TFAM Activated NME1     |       |       |
| 1.25714356480247e-162 | 0.450688330745741         | 0.395 | 0.186 |
| 2.24136126168632e-158 | 2 BRIX1 Activated NME1    |       |       |
| 2.91795115048118e-162 | 0.431012857833246         | 0.257 | 0.097 |
| 5.2024151061929e-158  | 2 MCRIP2 Activated NME1   |       |       |
| 9.89715996230779e-162 | 0.417400178337802         | 0.264 | 0.094 |
| 1.76456464967986e-157 | 2 C20orf27 Activated NME1 |       |       |
| 1.51732859620511e-161 | 0.432648301971892         | 0.61  | 0.381 |
| 2.70524515417409e-157 | 2 BZW1 Activated NME1     |       |       |
| 2.79754715237004e-161 | -0.638818451366305        | 0.099 | 0.256 |
| 4.98774681796055e-157 | 2 MCUB Activated NME1     |       |       |
| 5.11247435638418e-161 | 0.444779428159448         | 0.411 | 0.202 |
| 9.11503052999735e-157 | 2 RPIA Activated NME1     |       |       |
| 5.32448643172297e-161 | 0.461762959292796         | 0.398 | 0.196 |
| 9.49302685911889e-157 | 2 AATF Activated NME1     |       |       |
| 6.72592690739967e-161 | 0.443108569208736         | 0.567 | 0.344 |
| 1.19916550832029e-156 | 2 PSMA5 Activated NME1    |       |       |
| 1.00070442099631e-160 | 0.456117517489911         | 0.369 | 0.171 |
| 1.78415591219432e-156 | 2 FAM136A Activated NME1  |       |       |
| 1.54769027133073e-160 | -0.747788018338524        | 0.15  | 0.313 |
| 2.75937698475556e-156 | 2 GGA2 Activated NME1     |       |       |
| 1.61220177023072e-160 | 0.640407191394582         | 0.33  | 0.142 |
| 2.87439453614436e-156 | 2 DDIT4 Activated NME1    |       |       |
| 1.71323065073081e-160 | 0.429909234981029         | 0.324 | 0.135 |
| 3.05451892718797e-156 | 2 NDUF4F4 Activated NME1  |       |       |
| 1.76983181920021e-160 | -0.659869697169545        | 0.109 | 0.27  |
| 3.15543315045205e-156 | 2 TBC1D10C Activated NME1 |       |       |
| 4.45801893989695e-160 | 0.441676956231689         | 0.406 | 0.203 |
| 7.94820196794227e-156 | 2 MRPS23 Activated NME1   |       |       |
| 1.03460961118394e-159 | 0.355662372026216         | 0.19  | 0.059 |
| 1.84460547577985e-155 | 2 BYSL Activated NME1     |       |       |
| 1.69030304931535e-159 | 0.30652163422984          | 0.936 | 0.791 |
| 3.01364130662433e-155 | 2 HNRNPK Activated NME1   |       |       |
| 2.57488489520993e-159 | 0.437925272112678         | 0.318 | 0.133 |
| 4.59076227966979e-155 | 2 GNL2 Activated NME1     |       |       |

|                       |                           |       |       |
|-----------------------|---------------------------|-------|-------|
| 1.24501949286659e-158 | 0.442638176966221         | 0.733 | 0.524 |
| 2.21974525383184e-154 | 2 CNBP Activated NME1     |       |       |
| 2.12381807711529e-158 | 0.329257138442769         | 0.865 | 0.678 |
| 3.78655524968885e-154 | 2 ATP5MPL Activated NME1  |       |       |
| 2.95073714407951e-158 | 0.386240074105554         | 0.729 | 0.5   |
| 5.26086925417935e-154 | 2 NDUFB8 Activated NME1   |       |       |
| 3.80514466378338e-158 | 0.435208157787011         | 0.361 | 0.17  |
| 6.78419242105939e-154 | 2 TSTA3 Activated NME1    |       |       |
| 6.05575556810546e-158 | -0.704259195194461        | 0.07  | 0.227 |
| 1.07968066023752e-153 | 2 FAM111B Activated NME1  |       |       |
| 7.28302268037146e-158 | -0.754095438676379        | 0.235 | 0.405 |
| 1.29849011368343e-153 | 2 EVI2B Activated NME1    |       |       |
| 5.917149730187e-157   | 0.441593086949923         | 0.404 | 0.203 |
| 1.05496862539504e-152 | 2 HSPH1 Activated NME1    |       |       |
| 3.73320304474745e-156 | 0.425075744283126         | 0.257 | 0.08  |
| 6.65592770848022e-152 | 2 PARVB Activated NME1    |       |       |
| 1.22857685438642e-155 | 0.430642282899313         | 0.651 | 0.429 |
| 2.19042967368556e-151 | 2 VCP Activated NME1      |       |       |
| 6.18558541470609e-155 | 0.407830505977605         | 0.262 | 0.111 |
| 1.10282802358795e-150 | 2 ISOC2 Activated NME1    |       |       |
| 6.69737581371411e-155 | 0.439786903919057         | 0.401 | 0.2   |
| 1.19407513382709e-150 | 2 NUTF2 Activated NME1    |       |       |
| 7.6985923523035e-155  | 0.422806235441703         | 0.216 | 0.071 |
| 1.37258203049219e-150 | 2 SLC43A3 Activated NME1  |       |       |
| 1.16534155558442e-154 | -0.440061167945126        | 0.01  | 0.123 |
| 2.07768745945146e-150 | 2 CPNE5 Activated NME1    |       |       |
| 1.45335198076079e-154 | -0.691791079981211        | 0.332 | 0.487 |
| 2.59118124649841e-150 | 2 GPSM3 Activated NME1    |       |       |
| 2.16809897579019e-154 | 0.425032424724156         | 0.534 | 0.309 |
| 3.86550366393634e-150 | 2 PSMC6 Activated NME1    |       |       |
| 3.51565806945512e-154 | 0.453810548354055         | 0.435 | 0.226 |
| 6.26806677203153e-150 | 2 PABPC4 Activated NME1   |       |       |
| 1.93451160866188e-153 | 0.38925048717489          | 0.235 | 0.087 |
| 3.44904074708327e-149 | 2 BOLA3 Activated NME1    |       |       |
| 9.98209654525667e-153 | 0.354429703446991         | 0.874 | 0.701 |
| 1.77970799305381e-148 | 2 ATP5MC2 Activated NME1  |       |       |
| 1.49219574392232e-152 | 0.417915874250531         | 0.36  | 0.162 |
| 2.6604357918391e-148  | 2 TMEM126A Activated NME1 |       |       |
| 1.89821564158808e-152 | 0.446011133956452         | 0.4   | 0.2   |
| 3.38432866738739e-148 | 2 TRAF4 Activated NME1    |       |       |
| 2.72529773920008e-152 | 0.394858674533185         | 0.23  | 0.081 |
| 4.85893333921982e-148 | 2 TBL3 Activated NME1     |       |       |
| 3.26899092881262e-152 | 0.430830086216674         | 0.367 | 0.173 |
| 5.82828392698002e-148 | 2 GGCT Activated NME1     |       |       |
| 3.53241070970344e-152 | -0.524594433164942        | 0.016 | 0.13  |
| 6.29793505433026e-148 | 2 CD38 Activated NME1     |       |       |
| 4.25479977058054e-152 | -0.714310394059203        | 0.068 | 0.204 |
| 7.58588251096804e-148 | 2 DAAM1 Activated NME1    |       |       |
| 8.99561172172702e-152 | 0.420192048685699         | 0.283 | 0.112 |
| 1.60382761386671e-147 | 2 PTGES2 Activated NME1   |       |       |

|                       |                           |       |       |
|-----------------------|---------------------------|-------|-------|
| 2.87855981760347e-151 | 0.426124590899462         | 0.447 | 0.236 |
| 5.13218429880523e-147 | 2 MRPS26 Activated NME1   |       |       |
| 6.16398461245317e-150 | 0.410598768490844         | 0.645 | 0.421 |
| 1.09897681655428e-145 | 2 RAD23A Activated NME1   |       |       |
| 9.80949037492123e-150 | 0.553285993399219         | 0.312 | 0.111 |
| 1.74893403894471e-145 | 2 MYC Activated NME1      |       |       |
| 1.38598862945024e-149 | 0.429659071657437         | 0.317 | 0.144 |
| 2.47107912744683e-145 | 2 POLR2H Activated NME1   |       |       |
| 1.83629251687688e-149 | 0.387715862572421         | 0.705 | 0.484 |
| 3.27392592833979e-145 | 2 SRRM1 Activated NME1    |       |       |
| 2.01488105745848e-149 | 0.389292666971636         | 0.704 | 0.48  |
| 3.59233143734273e-145 | 2 NDUFA11 Activated NME1  |       |       |
| 2.44573518816492e-148 | 0.379594461318612         | 0.603 | 0.371 |
| 4.36050126697923e-144 | 2 YWHAE Activated NME1    |       |       |
| 3.05993121023916e-148 | 0.403261929629391         | 0.283 | 0.112 |
| 5.4555513547354e-144  | 2 GRWD1 Activated NME1    |       |       |
| 3.24107538171652e-148 | 0.422308247776051         | 0.291 | 0.12  |
| 5.77851329806238e-144 | 2 QTRT1 Activated NME1    |       |       |
| 3.26568716366169e-148 | -0.678165459772295        | 0.126 | 0.25  |
| 5.82239364409242e-144 | 2 CAPG Activated NME1     |       |       |
| 3.59880580136559e-148 | -0.574160124915883        | 0.037 | 0.166 |
| 6.41631086325471e-144 | 2 CD81 Activated NME1     |       |       |
| 4.65555399859794e-148 | -0.653792793740608        | 0.146 | 0.3   |
| 8.30038722410028e-144 | 2 ACAP1 Activated NME1    |       |       |
| 4.81081659500637e-148 | 0.441453020285379         | 0.431 | 0.232 |
| 8.57720490723685e-144 | 2 NAA20 Activated NME1    |       |       |
| 7.75487184359935e-148 | 0.425879928937608         | 0.405 | 0.205 |
| 1.38261610099533e-143 | 2 C19orf24 Activated NME1 |       |       |
| 8.34505936683359e-148 | 0.3847208654604           | 0.773 | 0.567 |
| 1.48784063451276e-143 | 2 HNRNPF Activated NME1   |       |       |
| 1.00242878517513e-147 | 0.36696342250401          | 0.78  | 0.574 |
| 1.78723028108874e-143 | 2 ST13 Activated NME1     |       |       |
| 1.09164858497394e-147 | -0.724676814729489        | 0.258 | 0.409 |
| 1.94630026215003e-143 | 2 SYPL1 Activated NME1    |       |       |
| 1.18001224806036e-147 | 0.422938691217223         | 0.246 | 0.09  |
| 2.10384383706681e-143 | 2 PCK2 Activated NME1     |       |       |
| 2.22505795467145e-147 | 0.389088801081843         | 0.583 | 0.361 |
| 3.96705582738372e-143 | 2 SNRPD3 Activated NME1   |       |       |
| 2.88016511794207e-147 | 0.343054848149499         | 0.823 | 0.624 |
| 5.13504638877892e-143 | 2 TRMT112 Activated NME1  |       |       |
| 3.31937317624406e-147 | 0.427347321508607         | 0.398 | 0.197 |
| 5.91811043592554e-143 | 2 HPRT1 Activated NME1    |       |       |
| 3.48583459179745e-147 | -0.74925002331343         | 0.205 | 0.353 |
| 6.21489449371567e-143 | 2 STK17A Activated NME1   |       |       |
| 5.88917620197244e-147 | 0.368118545211695         | 0.195 | 0.064 |
| 1.04998122504967e-142 | 2 ATAD3A Activated NME1   |       |       |
| 6.08109547152849e-147 | 0.393276911239719         | 0.682 | 0.468 |
| 1.08419851161882e-142 | 2 EIF3M Activated NME1    |       |       |
| 7.79777311840267e-147 | 0.361895880708689         | 0.202 | 0.063 |
| 1.39026496928001e-142 | 2 ALKBH2 Activated NME1   |       |       |

|                       |                         |       |       |
|-----------------------|-------------------------|-------|-------|
| 1.13414093690922e-146 | 0.580207681698476       | 0.435 | 0.236 |
| 2.02205987641544e-142 | 2 SRGN Activated NME1   |       |       |
| 2.03756656420043e-146 | 0.421642170694627       | 0.587 | 0.37  |
| 3.63277742731295e-142 | 2 SSB Activated NME1    |       |       |
| 3.4613200942553e-146  | 0.438497425795609       | 0.343 | 0.165 |
| 6.17118759604777e-142 | 2 TMA16 Activated NME1  |       |       |
| 1.02219341045243e-145 | 0.439516988182307       | 0.459 | 0.258 |
| 1.82246863149564e-141 | 2 PHPT1 Activated NME1  |       |       |
| 2.90497739991265e-145 | -0.79684825772833       | 0.116 | 0.254 |
| 5.17928420630426e-141 | 2 RGS1 Activated NME1   |       |       |
| 6.04343863127188e-145 | 0.411620456913256       | 0.304 | 0.132 |
| 1.07748467356946e-140 | 2 MAGOHB Activated NME1 |       |       |
| 9.3065977540715e-145  | 0.431496867019531       | 0.463 | 0.255 |
| 1.65927331357341e-140 | 2 NCBP2 Activated NME1  |       |       |
| 1.15027443215808e-144 | 0.441990488811076       | 0.369 | 0.185 |
| 2.05082428509465e-140 | 2 MRPL23 Activated NME1 |       |       |
| 1.91443330178017e-144 | 0.429269122590167       | 0.61  | 0.355 |
| 3.41324313374386e-140 | 2 PDCD4 Activated NME1  |       |       |
| 2.95198956660623e-144 | 0.371582677752679       | 0.199 | 0.063 |
| 5.26310219830225e-140 | 2 RRP9 Activated NME1   |       |       |
| 1.14487791565144e-143 | -0.624446756622106      | 0.084 | 0.229 |
| 2.04120283581495e-139 | 2 YPEL3 Activated NME1  |       |       |
| 7.55989331219137e-142 | 0.415702045747189       | 0.552 | 0.338 |
| 1.3478533786306e-137  | 2 BSG Activated NME1    |       |       |
| 8.76332894761277e-142 | 0.385228850823958       | 0.624 | 0.405 |
| 1.56241391806988e-137 | 2 ANP32A Activated NME1 |       |       |
| 9.34036177471692e-142 | -0.503458455489208      | 0.03  | 0.152 |
| 1.66529310081428e-137 | 2 SOCS1 Activated NME1  |       |       |
| 3.62055267091262e-141 | -0.677413075839105      | 0.719 | 0.769 |
| 6.4550833569701e-137  | 2 MYL12A Activated NME1 |       |       |
| 7.22351335550024e-141 | 0.434177777354745       | 0.497 | 0.287 |
| 1.28788019615214e-136 | 2 HAX1 Activated NME1   |       |       |
| 1.02783953283367e-140 | 0.39185303747507        | 0.267 | 0.109 |
| 1.83253510308915e-136 | 2 NUP93 Activated NME1  |       |       |
| 1.89166988685868e-140 | 0.416512160352106       | 0.342 | 0.163 |
| 3.37265824128034e-136 | 2 NOC2L Activated NME1  |       |       |
| 4.523724872579e-140   | 0.420280011203178       | 0.352 | 0.167 |
| 8.0653490753211e-136  | 2 YIF1A Activated NME1  |       |       |
| 6.30933987747794e-140 | 0.381159160268284       | 0.227 | 0.078 |
| 1.12489220675554e-135 | 2 PDCD11 Activated NME1 |       |       |
| 1.54189212430862e-139 | 0.377601197380901       | 0.517 | 0.302 |
| 2.74903946842984e-135 | 2 IMP4 Activated NME1   |       |       |
| 3.75122282069695e-139 | -0.655930119737543      | 0.061 | 0.187 |
| 6.68805516702059e-135 | 2 MARCH1 Activated NME1 |       |       |
| 1.05945302906481e-138 | -0.462472760249643      | 0.02  | 0.13  |
| 1.88889880551965e-134 | 2 PYCARD Activated NME1 |       |       |
| 1.3874575306645e-138  | 0.39920563358176        | 0.304 | 0.137 |
| 2.47369803142174e-134 | 2 PPIH Activated NME1   |       |       |
| 1.99255937196017e-138 | 0.411946812734448       | 0.271 | 0.106 |
| 3.55253410426779e-134 | 2 IARS Activated NME1   |       |       |

|                       |                    |          |                |       |
|-----------------------|--------------------|----------|----------------|-------|
| 3.54148130497662e-138 | 0.41483114788368   | 0.441    | 0.242          |       |
| 6.31410701864282e-134 | 2                  | HDAC2    | Activated NME1 |       |
| 3.93455169165137e-138 | 0.407002949431804  |          | 0.335          | 0.163 |
| 7.01491221104523e-134 | 2                  | FARSA    | Activated NME1 |       |
| 5.70022929722624e-138 | -0.590208872731163 |          | 0.015          | 0.12  |
| 1.01629388140247e-133 | 2                  | VPREB3   | Activated NME1 |       |
| 1.06548897362739e-137 | -0.578410054997708 |          | 0.048          | 0.173 |
| 1.89966029108027e-133 | 2                  | C12orf75 | Activated NME1 |       |
| 1.93258444371199e-137 | -1.20929103297188  |          | 0.319          | 0.44  |
| 3.4456048046941e-133  | 2                  | STMN1    | Activated NME1 |       |
| 5.58385522557468e-137 | 0.373122603239366  |          | 0.217          | 0.074 |
| 9.95545548167709e-133 | 2                  | POLR1C   | Activated NME1 |       |
| 1.16132806244342e-136 | 0.392280999107356  |          | 0.322          | 0.153 |
| 2.07053180253037e-132 | 2                  | RPL26L1  | Activated NME1 |       |
| 1.26366770995129e-136 | 0.385832027484674  |          | 0.559          | 0.348 |
| 2.25299316007215e-132 | 2                  | CDC37    | Activated NME1 |       |
| 3.53668577918036e-136 | -0.73872856404408  |          | 0.064          | 0.199 |
| 6.30555707570066e-132 | 2                  | RGS2     | Activated NME1 |       |
| 3.67627489903396e-136 | 0.32656679073534   | 0.896    | 0.742          |       |
| 6.55443051748766e-132 | 2                  | MT-ND5   | Activated NME1 |       |
| 3.89846671419656e-136 | 0.379077873786036  |          | 0.42           | 0.23  |
| 6.95057630474104e-132 | 2                  | MRPL13   | Activated NME1 |       |
| 8.17609108492962e-136 | 0.399545939036088  |          | 0.432          | 0.243 |
| 1.4577152795321e-131  | 2                  | PSMC2    | Activated NME1 |       |
| 8.33371342257155e-136 | -0.614615962793242 |          | 0.146          | 0.3   |
| 1.48581776611028e-131 | 2                  | YPEL5    | Activated NME1 |       |
| 1.38130755437301e-135 | -0.753504801285921 |          | 0.269          | 0.421 |
| 2.46273323869164e-131 | 2                  | SMIM14   | Activated NME1 |       |
| 7.53025187099789e-135 | 0.41709196875634   | 0.424    | 0.23           |       |
| 1.34256860608021e-130 | 2                  | SUPT16H  | Activated NME1 |       |
| 8.82114387493864e-135 | 0.34102816791447   | 0.184    | 0.063          |       |
| 1.57272174146281e-130 | 2                  | PPIL1    | Activated NME1 |       |
| 1.68936267822684e-134 | 0.319108627837476  |          | 0.153          | 0.046 |
| 3.01196471901063e-130 | 2                  | CTPS1    | Activated NME1 |       |
| 2.09268699654805e-134 | 0.40229960569665   | 0.481    | 0.281          |       |
| 3.73105164614553e-130 | 2                  | SRP72    | Activated NME1 |       |
| 5.25982082789728e-134 | 0.476854527637255  |          | 0.309          | 0.135 |
| 9.37773455405805e-130 | 2                  | CEBPB    | Activated NME1 |       |
| 1.18487218467991e-133 | -0.539173154188504 |          | 0.05           | 0.181 |
| 2.1125086180658e-129  | 2                  | SEL1L3   | Activated NME1 |       |
| 1.22236754287925e-133 | 0.403748584202052  |          | 0.416          | 0.223 |
| 2.17935909219942e-129 | 2                  | ABCF1    | Activated NME1 |       |
| 1.95754597251814e-133 | 0.373842559560355  |          | 0.558          | 0.346 |
| 3.4901087144026e-129  | 2                  | EWSR1    | Activated NME1 |       |
| 5.45318492583279e-133 | 0.379324444316923  |          | 0.308          | 0.135 |
| 9.72248340426728e-129 | 2                  | DDX56    | Activated NME1 |       |
| 6.7946642783708e-133  | -0.714704866944524 |          | 0.326          | 0.461 |
| 1.21142069419073e-128 | 2                  | PNRC1    | Activated NME1 |       |
| 7.57808383612332e-133 | 0.384556174773904  |          | 0.278          | 0.122 |
| 1.35109656714243e-128 | 2                  | PSME3    | Activated NME1 |       |

|                       |                    |                         |       |
|-----------------------|--------------------|-------------------------|-------|
| 9.20859157992645e-133 | 0.394508135742774  | 0.316                   | 0.137 |
| 1.64179979278509e-128 | 2                  | FAM162A Activated NME1  |       |
| 9.89654584589005e-133 | 0.378087984707232  | 0.47                    | 0.27  |
| 1.76445515886374e-128 | 2                  | CDC123 Activated NME1   |       |
| 1.91166744867868e-132 | 0.334768712703344  | 0.645                   | 0.427 |
| 3.40831189424922e-128 | 2                  | SEM1 Activated NME1     |       |
| 6.0872124914562e-132  | 0.403316143761912  | 0.405                   | 0.22  |
| 1.08528911510173e-127 | 2                  | MRPS16 Activated NME1   |       |
| 7.860312618275e-132   | 0.406524839066691  | 0.375                   | 0.196 |
| 1.40141513671225e-127 | 2                  | PSMD12 Activated NME1   |       |
| 5.86049066613777e-131 | 0.41033223130124   | 0.265 0.116             |       |
| 1.0448668808657e-126  | 2                  | GOT1 Activated NME1     |       |
| 1.98100434974611e-130 | 0.362924440074933  | 0.637                   | 0.429 |
| 3.53193265516233e-126 | 2                  | SF3B5 Activated NME1    |       |
| 2.07506236397543e-130 | -0.456422713820763 | 0.016                   | 0.114 |
| 3.69962868873179e-126 | 2                  | RMI2 Activated NME1     |       |
| 2.30825131747811e-130 | 0.409764647121225  | 0.369                   | 0.192 |
| 4.11538127393173e-126 | 2                  | CHORDC1 Activated NME1  |       |
| 8.39860495567652e-130 | 0.392220318501877  | 0.298                   | 0.138 |
| 1.49738727754757e-125 | 2                  | UTP11 Activated NME1    |       |
| 7.23953157802159e-129 | 0.37762408247346   | 0.262 0.113             |       |
| 1.29073608504547e-124 | 2                  | TOMM5 Activated NME1    |       |
| 1.28072003405957e-128 | 0.345607361775934  | 0.582                   | 0.379 |
| 2.28339574872482e-124 | 2                  | NDUFS5 Activated NME1   |       |
| 5.2649802842708e-128  | 0.38590755438936   | 0.343 0.167             |       |
| 9.38693334882641e-124 | 2                  | USP14 Activated NME1    |       |
| 1.96235934272974e-127 | 0.382613953884606  | 0.325                   | 0.159 |
| 3.49869047215285e-123 | 2                  | SSSCA1 Activated NME1   |       |
| 3.70421323138218e-127 | -0.423551142567677 | 0.009                   | 0.104 |
| 6.60424177023129e-123 | 2                  | WDR66 Activated NME1    |       |
| 9.70455203647171e-127 | 0.371220963464041  | 0.284                   | 0.128 |
| 1.73022458258254e-122 | 2                  | MPHOSPH6 Activated NME1 |       |
| 1.09905711922544e-126 | -0.715483012400848 | 0.191                   | 0.338 |
| 1.95950893786704e-122 | 2                  | AES Activated NME1      |       |
| 1.49456347136125e-126 | -0.588555636385212 | 0.112                   | 0.253 |
| 2.66465721308997e-122 | 2                  | NCF4 Activated NME1     |       |
| 1.89101915283903e-126 | 0.374098823577974  | 0.521                   | 0.317 |
| 3.37149804759671e-122 | 2                  | TTC1 Activated NME1     |       |
| 2.07770864095304e-126 | 0.38253138023479   | 0.386 0.207             |       |
| 3.70434673595517e-122 | 2                  | NUDT5 Activated NME1    |       |
| 2.86117419562747e-126 | 0.376926636691861  | 0.284                   | 0.13  |
| 5.10118747338422e-122 | 2                  | ADSL Activated NME1     |       |
| 8.38164970350142e-126 | 0.37214535170549   | 0.274 0.127             |       |
| 1.49436432563727e-121 | 2                  | FAM207A Activated NME1  |       |
| 1.85201713939377e-125 | 0.334902232109334  | 0.777                   | 0.586 |
| 3.30196135782516e-121 | 2                  | NOP10 Activated NME1    |       |
| 3.28259902002977e-125 | 0.391054817737065  | 0.368                   | 0.175 |
| 5.85254579281107e-121 | 2                  | ESF1 Activated NME1     |       |
| 8.81850689170945e-125 | 0.373333785479985  | 0.311                   | 0.143 |
| 1.57225159372288e-120 | 2                  | DNAJC2 Activated NME1   |       |



|                       |                             |       |       |
|-----------------------|-----------------------------|-------|-------|
| 9.02565796765357e-125 | -0.515602519531976          | 0.045 | 0.159 |
| 1.60918455905295e-120 | 2 ALOX5 Activated NME1      |       |       |
| 2.05387583148271e-124 | -0.611726197905061          | 0.083 | 0.22  |
| 3.66185521995052e-120 | 2 EAF2 Activated NME1       |       |       |
| 2.54089479757381e-124 | 0.361968180428822           | 0.551 | 0.337 |
| 4.53016133459435e-120 | 2 C8orf59 Activated NME1    |       |       |
| 4.54997781002161e-124 | 0.397020991185488           | 0.459 | 0.272 |
| 8.11215543748753e-120 | 2 G3BP1 Activated NME1      |       |       |
| 5.93649302618688e-123 | -0.428187576683807          | 0.02  | 0.121 |
| 1.05841734163886e-118 | 2 AC023590.1 Activated NME1 |       |       |
| 8.2449455901669e-123  | -0.432141993216145          | 0.016 | 0.116 |
| 1.46999134927086e-118 | 2 HRK Activated NME1        |       |       |
| 1.10931541621306e-122 | 0.385951894731778           | 0.397 | 0.21  |
| 1.97779845556627e-118 | 2 NOB1 Activated NME1       |       |       |
| 3.16431025646152e-122 | 0.367146588042435           | 0.299 | 0.129 |
| 5.64164875624524e-118 | 2 PRDX4 Activated NME1      |       |       |
| 5.6599846515773e-122  | 0.395014885419512           | 0.402 | 0.221 |
| 1.00911866352972e-117 | 2 MRPL15 Activated NME1     |       |       |
| 5.83873856431047e-122 | -0.63575499407548           | 0.371 | 0.505 |
| 1.04098869863091e-117 | 2 CYTIP Activated NME1      |       |       |
| 3.6397810831279e-121  | 0.326954576148843           | 0.196 | 0.066 |
| 6.48936569310873e-117 | 2 NAT10 Activated NME1      |       |       |
| 4.07956999160225e-121 | -0.39283758753236           | 0.013 | 0.111 |
| 7.27346533802765e-117 | 2 MYBL2 Activated NME1      |       |       |
| 5.06768407737222e-121 | 0.385163659703118           | 0.378 | 0.21  |
| 9.03517394154693e-117 | 2 TIMM17A Activated NME1    |       |       |
| 5.32175306323877e-121 | -0.686055719388216          | 0.15  | 0.28  |
| 9.48815353644841e-117 | 2 HHEX Activated NME1       |       |       |
| 7.78995824462536e-121 | 0.361221658639278           | 0.543 | 0.346 |
| 1.38887165543426e-116 | 2 POLR2E Activated NME1     |       |       |
| 1.44772920258095e-120 | 0.391872177559596           | 0.713 | 0.502 |
| 2.58115639528158e-116 | 2 ID3 Activated NME1        |       |       |
| 1.71800055586839e-120 | -0.739133931492141          | 0.172 | 0.318 |
| 3.06302319105776e-116 | 2 BCL7A Activated NME1      |       |       |
| 3.41157411555975e-120 | -0.738374409491133          | 0.123 | 0.247 |
| 6.08249549063148e-116 | 2 UBE2J1 Activated NME1     |       |       |
| 3.75212922916241e-120 | -0.538786359142618          | 0.925 | 0.936 |
| 6.68967120267367e-116 | 2 BTG1 Activated NME1       |       |       |
| 1.49147478372128e-119 | -0.654448830405644          | 0.118 | 0.25  |
| 2.65915039189667e-115 | 2 GCHFR Activated NME1      |       |       |
| 5.8871328642156e-119  | 0.378918610251521           | 0.332 | 0.163 |
| 1.049616918361e-114   | 2 SDAD1 Activated NME1      |       |       |
| 6.58674666594697e-119 | 0.360554061214269           | 0.317 | 0.146 |
| 1.17435106307168e-114 | 2 NOL11 Activated NME1      |       |       |
| 1.93769491062149e-118 | 0.368478642497632           | 0.478 | 0.29  |
| 3.45471625614706e-114 | 2 PSMD6 Activated NME1      |       |       |
| 2.29177524925537e-118 | 0.347901818061729           | 0.235 | 0.095 |
| 4.08600609189741e-114 | 2 LTV1 Activated NME1       |       |       |
| 3.91992013148918e-118 | 0.378712149285198           | 0.319 | 0.151 |
| 6.98882560243207e-114 | 2 MMAB Activated NME1       |       |       |

|                       |                    |                        |       |
|-----------------------|--------------------|------------------------|-------|
| 4.31049048123927e-118 | 0.324218431888362  | 0.199                  | 0.068 |
| 7.6851734790015e-114  | 2                  | TIMM8A Activated NME1  |       |
| 7.87490104865581e-118 | 0.361303599798757  | 0.372                  | 0.191 |
| 1.40401610796484e-113 | 2                  | MRPS35 Activated NME1  |       |
| 1.03859693162916e-117 | -0.503221305760404 | 0.945                  | 0.937 |
| 1.85171446940162e-113 | 2                  | EEF2 Activated NME1    |       |
| 2.02281524861907e-117 | 0.36588792122408   | 0.297                  | 0.138 |
| 3.60647730676293e-113 | 2                  | GRPEL1 Activated NME1  |       |
| 2.07024881762412e-117 | 0.330868942401594  | 0.2                    | 0.073 |
| 3.69104661694204e-113 | 2                  | UTP4 Activated NME1    |       |
| 5.55215719120386e-117 | 0.318063471457774  | 0.704                  | 0.493 |
| 9.89894105619737e-113 | 2                  | DNAJC8 Activated NME1  |       |
| 1.3105807261891e-116  | 0.333477056179957  | 0.267                  | 0.129 |
| 2.33663437672254e-112 | 2                  | WDR18 Activated NME1   |       |
| 2.14138550530834e-116 | 0.358290521991472  | 0.305                  | 0.146 |
| 3.81787621741425e-112 | 2                  | WDR77 Activated NME1   |       |
| 4.69113765961035e-116 | 0.34780938588255   | 0.263                  | 0.12  |
| 8.36382933331929e-112 | 2                  | EXOSC7 Activated NME1  |       |
| 7.6345509167071e-116  | 0.365921687575809  | 0.457                  | 0.269 |
| 1.36116408293971e-111 | 2                  | MRPL14 Activated NME1  |       |
| 1.313720040048e-114   | 0.316700808691997  | 0.151                  | 0.048 |
| 2.34223145940157e-110 | 2                  | MT1X Activated NME1    |       |
| 1.34039264657892e-114 | 0.339591673235246  | 0.523                  | 0.324 |
| 2.38978604958555e-110 | 2                  | MRPS18C Activated NME1 |       |
| 5.92779943728044e-114 | -0.441070667405865 | 0.021                  | 0.11  |
| 1.05686736167273e-109 | 2                  | CDKN2D Activated NME1  |       |
| 1.029882686614e-113   | 0.354571991155451  | 0.53                   | 0.324 |
| 1.83617784196411e-109 | 2                  | RNH1 Activated NME1    |       |
| 1.78220834124645e-113 | 0.355676445371975  | 0.456                  | 0.257 |
| 3.17749925160829e-109 | 2                  | HSPA5 Activated NME1   |       |
| 2.39325221990596e-113 | 0.344742814232089  | 0.406                  | 0.229 |
| 4.26692938287033e-109 | 2                  | PRPF31 Activated NME1  |       |
| 4.32432662352827e-113 | 0.36106631502493   | 0.316                  | 0.152 |
| 7.70984193708855e-109 | 2                  | SMIM37 Activated NME1  |       |
| 5.43347904347052e-113 | 0.322980429205978  | 0.183                  | 0.065 |
| 9.68734978660358e-109 | 2                  | DPH2 Activated NME1    |       |
| 8.30538241286095e-113 | -0.668355508471776 | 0.237                  | 0.377 |
| 1.48076663038898e-108 | 2                  | RCS1 Activated NME1    |       |
| 1.58146341792875e-112 | -0.415342795242507 | 0.042                  | 0.151 |
| 2.81959112782518e-108 | 2                  | CORO1B Activated NME1  |       |
| 3.88202049768624e-112 | 0.348843512097977  | 0.505                  | 0.313 |
| 6.92125434532479e-108 | 2                  | ACP1 Activated NME1    |       |
| 4.7439144269543e-112  | -0.648334102596258 | 0.127                  | 0.257 |
| 8.45792503181683e-108 | 2                  | RASGRP2 Activated NME1 |       |
| 7.68054479539606e-112 | 0.354980088911809  | 0.407                  | 0.231 |
| 1.36936433157116e-107 | 2                  | NDUFA9 Activated NME1  |       |
| 1.93714725232752e-111 | 0.357044649270139  | 0.318                  | 0.169 |
| 3.45373983617474e-107 | 2                  | LRRC59 Activated NME1  |       |
| 1.98858432832296e-111 | -0.705472625677786 | 0.346                  | 0.447 |
| 3.545446998967e-107   | 2                  | COTL1 Activated NME1   |       |

|                       |                          |       |       |
|-----------------------|--------------------------|-------|-------|
| 3.53228426732897e-111 | -0.673135495609439       | 0.506 | 0.628 |
| 6.29770962022083e-107 | 2 MEF2C Activated NME1   |       |       |
| 3.55444434672855e-110 | 0.33408754868834         | 0.61  | 0.407 |
| 6.33721882578233e-106 | 2 RNPS1 Activated NME1   |       |       |
| 4.38104648598264e-110 | 0.337759526683379        | 0.509 | 0.304 |
| 7.81096777985846e-106 | 2 P4HB Activated NME1    |       |       |
| 4.10057124607833e-109 | 0.349297628432205        | 0.414 | 0.238 |
| 7.31090847463305e-105 | 2 EIF4A3 Activated NME1  |       |       |
| 9.40615162778701e-109 | -0.645681635159699       | 0.176 | 0.301 |
| 1.67702277371815e-104 | 2 BCAS4 Activated NME1   |       |       |
| 1.03163373587623e-108 | -0.411893498655033       | 0.028 | 0.131 |
| 1.83929978769374e-104 | 2 VNN2 Activated NME1    |       |       |
| 2.53210037839205e-108 | 0.358942338027668        | 0.46  | 0.272 |
| 4.51448176463518e-104 | 2 PYURF Activated NME1   |       |       |
| 3.61691583362935e-108 | 0.354534575647907        | 0.261 | 0.116 |
| 6.44859923977777e-104 | 2 SRPRB Activated NME1   |       |       |
| 4.43326396376168e-108 | 0.343817145975533        | 0.493 | 0.306 |
| 7.90406632099071e-104 | 2 NDUFB6 Activated NME1  |       |       |
| 4.4868618529205e-108  | -0.45173994234011        | 0.04  | 0.149 |
| 7.99962599757196e-104 | 2 SIT1 Activated NME1    |       |       |
| 4.94516181646001e-108 | 0.302115246281916        | 0.618 | 0.414 |
| 8.81672900256655e-104 | 2 LSM3 Activated NME1    |       |       |
| 5.27348735214993e-108 | 0.335767214860591        | 0.531 | 0.342 |
| 9.40210060014811e-104 | 2 TKT Activated NME1     |       |       |
| 1.17030798378753e-107 | -0.648466727745731       | 0.093 | 0.214 |
| 2.08654210429478e-103 | 2 HMCES Activated NME1   |       |       |
| 1.75620786354884e-107 | -1.41433430475421        | 0.076 | 0.186 |
| 3.13114299992122e-103 | 2 MZB1 Activated NME1    |       |       |
| 4.02841557261838e-107 | 0.340500769430748        | 0.24  | 0.095 |
| 7.1822621244213e-103  | 2 SRFBP1 Activated NME1  |       |       |
| 6.23949513944792e-107 | 0.337580652197373        | 0.545 | 0.353 |
| 1.11243958841217e-102 | 2 NDUFA6 Activated NME1  |       |       |
| 8.08661770339502e-106 | 0.300426838276657        | 0.618 | 0.427 |
| 1.4417630703383e-101  | 2 ATP5F1C Activated NME1 |       |       |
| 9.45566165456387e-106 | 0.317712954786397        | 0.656 | 0.465 |
| 1.68584991639219e-101 | 2 WDR830S Activated NME1 |       |       |
| 1.05571291646751e-105 | -0.313360378523118       | 1     | 0.996 |
| 1.88223055876992e-101 | 2 RPS15A Activated NME1  |       |       |
| 1.52137129240342e-105 | -0.515351264780517       | 0.092 | 0.221 |
| 2.71245287722606e-101 | 2 GLRX Activated NME1    |       |       |
| 1.94872329143936e-105 | 0.342662362628158        | 0.756 | 0.52  |
| 3.47437875630723e-101 | 2 CCR7 Activated NME1    |       |       |
| 2.74521597159844e-105 | -0.583011735539886       | 0.266 | 0.389 |
| 4.89444555576285e-101 | 2 ZFAND6 Activated NME1  |       |       |
| 3.40569972288788e-105 | -0.547454101334328       | 0.792 | 0.818 |
| 6.07202203593679e-101 | 2 NOP53 Activated NME1   |       |       |
| 3.50821378035006e-105 | 0.341838657175005        | 0.312 | 0.16  |
| 6.25479434898611e-101 | 2 MRPL19 Activated NME1  |       |       |
| 3.92766134439359e-105 | 0.343928695249033        | 0.332 | 0.173 |
| 7.00262741091933e-101 | 2 METTL5 Activated NME1  |       |       |

|                       |                           |       |       |
|-----------------------|---------------------------|-------|-------|
| 4.88864558574276e-105 | 0.360345473307697         | 0.308 | 0.15  |
| 8.71596621482077e-101 | 2 NMT1 Activated NME1     |       |       |
| 7.66870040920014e-105 | -0.696142091039389        | 0.662 | 0.763 |
| 1.36725259595629e-100 | 2 HLA-DRB1 Activated NME1 |       |       |
| 8.5091537653404e-105  | 0.341426347094047         | 0.367 | 0.19  |
| 1.51709702482254e-100 | 2 PITHD1 Activated NME1   |       |       |
| 1.09124661600274e-104 | 0.325097576425894         | 0.537 | 0.348 |
| 1.94558359167128e-100 | 2 RPS19BP1 Activated NME1 |       |       |
| 1.27703210358941e-104 | -0.30760325187788         | 1     | 0.999 |
| 2.27682053748957e-100 | 2 RPL34 Activated NME1    |       |       |
| 7.79157192450699e-104 | -0.585666459947868        | 0.169 | 0.297 |
| 1.38915935842035e-99  | 2 CARHSP1 Activated NME1  |       |       |
| 1.08651788903152e-103 | 0.410659294974894         | 0.307 | 0.147 |
| 1.93715274435429e-99  | 2 CD58 Activated NME1     |       |       |
| 2.11766364239381e-103 | 0.335573564622687         | 0.416 | 0.24  |
| 3.77558250802393e-99  | 2 NSFL1C Activated NME1   |       |       |
| 7.27021508591759e-103 | 0.325911512860823         | 0.235 | 0.107 |
| 1.29620664766825e-98  | 2 GCSH Activated NME1     |       |       |
| 9.84779039673827e-103 | -0.605090725228082        | 0.02  | 0.103 |
| 1.75576254983447e-98  | 2 PCLAF Activated NME1    |       |       |
| 1.9166444250127e-102  | 0.341166257593874         | 0.222 | 0.101 |
| 3.41718534535513e-98  | 2 DESI1 Activated NME1    |       |       |
| 2.10818319429989e-102 | -0.643639419844401        | 0.117 | 0.222 |
| 3.75867981711727e-98  | 2 LBH Activated NME1      |       |       |
| 2.84356533768994e-102 | 0.314293206768091         | 0.191 | 0.073 |
| 5.0697926405674e-98   | 2 EXOSC5 Activated NME1   |       |       |
| 1.36409543277342e-101 | -0.681361534430756        | 0.397 | 0.494 |
| 2.43204574709173e-97  | 2 NEAT1 Activated NME1    |       |       |
| 2.25769275724572e-101 | 0.329369988655003         | 0.419 | 0.249 |
| 4.02524041689339e-97  | 2 MTCH2 Activated NME1    |       |       |
| 2.98775454330194e-101 | -0.444738869658509        | 0.032 | 0.122 |
| 5.32686757525303e-97  | 2 PBXIP1 Activated NME1   |       |       |
| 5.12332926712798e-101 | 0.330231545021803         | 0.298 | 0.156 |
| 9.13438375036247e-97  | 2 POLDIP2 Activated NME1  |       |       |
| 9.34931735705908e-101 | 0.324686494611906         | 0.315 | 0.157 |
| 1.66688979159006e-96  | 2 GTPBP6 Activated NME1   |       |       |
| 2.00791482870287e-100 | 0.314444418446639         | 0.206 | 0.082 |
| 3.57991134809434e-96  | 2 NOP14 Activated NME1    |       |       |
| 4.55092803823723e-100 | 0.306248543722691         | 0.622 | 0.43  |
| 8.11384959937317e-96  | 2 CSNK2B Activated NME1   |       |       |
| 1.19248157772176e-99  | 0.312359212312412         | 0.461 | 0.289 |
| 2.12607540492013e-95  | 2 TIMM8B Activated NME1   |       |       |
| 1.59146086626844e-99  | 0.326671479534588         | 0.276 | 0.133 |
| 2.83741557847e-95     | 2 TIMM9 Activated NME1    |       |       |
| 3.90260626556324e-99  | -0.557296224044651        | 0.122 | 0.241 |
| 6.9579567108727e-95   | 2 ATM Activated NME1      |       |       |
| 3.91786228150329e-99  | -0.493888592588341        | 0.059 | 0.154 |
| 6.98515666169221e-95  | 2 SUN2 Activated NME1     |       |       |
| 4.33914485416025e-99  | 0.305635120149108         | 0.603 | 0.412 |
| 7.73626136048231e-95  | 2 ZNF706 Activated NME1   |       |       |

|                      |                          |       |       |
|----------------------|--------------------------|-------|-------|
| 7.56108463037035e-99 | -0.503958475710388       | 0.065 | 0.168 |
| 1.34806577874873e-94 | 2 GLIPR1 Activated NME1  |       |       |
| 8.02718298947608e-99 | -0.647575918029423       | 0.292 | 0.416 |
| 1.43116645519369e-94 | 2 STX7 Activated NME1    |       |       |
| 1.01565130476335e-98 | 0.327155633468089        | 0.283 | 0.138 |
| 1.81080471126257e-94 | 2 BCCIP Activated NME1   |       |       |
| 3.01200165381706e-98 | 0.318676856344364        | 0.521 | 0.331 |
| 5.37009774859043e-94 | 2 PDIA6 Activated NME1   |       |       |
| 3.25376871293042e-98 | -0.531702853517238       | 0.148 | 0.271 |
| 5.80114423828365e-94 | 2 CNN2 Activated NME1    |       |       |
| 4.93927044736778e-98 | 0.345142920225964        | 0.427 | 0.25  |
| 8.80622528061202e-94 | 2 CEBPZ Activated NME1   |       |       |
| 1.27475460910755e-97 | -0.486272150949157       | 0.04  | 0.13  |
| 2.27275999257784e-93 | 2 LPP Activated NME1     |       |       |
| 1.70257785349974e-97 | 0.304316279871957        | 0.196 | 0.077 |
| 3.03552605500468e-93 | 2 RRP1B Activated NME1   |       |       |
| 1.96440408880794e-97 | 0.335180755614419        | 0.441 | 0.257 |
| 3.50233604993567e-93 | 2 SRI Activated NME1     |       |       |
| 4.00239220620341e-97 | -0.597713908392158       | 0.321 | 0.424 |
| 7.13586506444005e-93 | 2 NPC2 Activated NME1    |       |       |
| 4.75298646801865e-97 | 0.314564737415264        | 0.502 | 0.318 |
| 8.47409957383045e-93 | 2 PPM1G Activated NME1   |       |       |
| 4.96518049651161e-97 | -0.602786683099836       | 0.269 | 0.396 |
| 8.85242030723055e-93 | 2 EVL Activated NME1     |       |       |
| 5.24487818648254e-97 | 0.310844160491129        | 0.562 | 0.368 |
| 9.35109331867973e-93 | 2 EIF4H Activated NME1   |       |       |
| 5.25436582925556e-97 | 0.323291437265421        | 0.392 | 0.217 |
| 9.36800883697975e-93 | 2 DNAJC19 Activated NME1 |       |       |
| 1.11713196729163e-96 | 0.307128969698353        | 0.553 | 0.363 |
| 1.99173458448426e-92 | 2 SRSF10 Activated NME1  |       |       |
| 1.17180365166353e-96 | 0.323640223094944        | 0.294 | 0.142 |
| 2.08920873055091e-92 | 2 NAA15 Activated NME1   |       |       |
| 1.23316006562885e-96 | 0.343987928227577        | 0.469 | 0.296 |
| 2.19860108100967e-92 | 2 AKR1A1 Activated NME1  |       |       |
| 1.4756972378614e-96  | 0.321425324646467        | 0.553 | 0.362 |
| 2.6310206053831e-92  | 2 ANXA7 Activated NME1   |       |       |
| 1.59324453731745e-96 | -0.480418496849175       | 0.095 | 0.209 |
| 2.84059568558329e-92 | 2 POLD4 Activated NME1   |       |       |
| 1.97497507228577e-96 | 0.335233035208897        | 0.355 | 0.188 |
| 3.5211830563783e-92  | 2 NIPA2 Activated NME1   |       |       |
| 3.5143958581135e-96  | -0.337094095029313       | 1     | 0.998 |
| 6.26581637543056e-92 | 2 B2M Activated NME1     |       |       |
| 8.26064968446899e-96 | -0.605998871926128       | 0.186 | 0.3   |
| 1.47279123224398e-91 | 2 DCK Activated NME1     |       |       |
| 1.20270964242582e-95 | 0.315434436027847        | 0.248 | 0.12  |
| 2.144311021481e-91   | 2 EIF4G1 Activated NME1  |       |       |
| 1.69736815878365e-95 | 0.308536593671197        | 0.25  | 0.119 |
| 3.02623769029536e-91 | 2 FH Activated NME1      |       |       |
| 1.85843967493083e-95 | 0.317396994305073        | 0.611 | 0.421 |
| 3.31341209643418e-91 | 2 FDPS Activated NME1    |       |       |

|                      |                            |       |       |
|----------------------|----------------------------|-------|-------|
| 2.10755761351709e-95 | -0.487994675177488         | 0.995 | 0.979 |
| 3.75756446913963e-91 | 2 MT-C01 Activated NME1    |       |       |
| 3.48925536991314e-95 | 0.322230786186182          | 0.409 | 0.236 |
| 6.22099339901815e-91 | 2 DDX27 Activated NME1     |       |       |
| 8.46527933152007e-95 | 0.342331021839352          | 0.326 | 0.166 |
| 1.50927465201671e-90 | 2 ARL2 Activated NME1      |       |       |
| 1.17922044397125e-94 | 0.390237225614207          | 0.431 | 0.26  |
| 2.10243212955635e-90 | 2 GADD45B Activated NME1   |       |       |
| 1.76825574892066e-94 | 0.330857410859782          | 0.449 | 0.265 |
| 3.15262317475065e-90 | 2 DPP7 Activated NME1      |       |       |
| 2.61190541569699e-94 | -0.504842875653213         | 0.06  | 0.18  |
| 4.65676616564616e-90 | 2 CCDC88A Activated NME1   |       |       |
| 4.39221359018484e-94 | 0.326698614731054          | 0.361 | 0.205 |
| 7.83087760994054e-90 | 2 SF3A3 Activated NME1     |       |       |
| 7.24476145094726e-94 | 0.316992389798292          | 0.208 | 0.085 |
| 1.29166851908939e-89 | 2 PLGRKT Activated NME1    |       |       |
| 7.63197534463156e-94 | 0.302325504847056          | 0.396 | 0.233 |
| 1.36070488419436e-89 | 2 MRPL16 Activated NME1    |       |       |
| 8.06268379924787e-94 | 0.317908766159308          | 0.294 | 0.145 |
| 1.4374958945679e-89  | 2 MPHOSPH10 Activated NME1 |       |       |
| 1.35554208523671e-93 | -1.22265967223072          | 0.08  | 0.155 |
| 2.41679598376853e-89 | 2 IGHA1 Activated NME1     |       |       |
| 2.41741199916362e-93 | 0.326703004276053          | 0.346 | 0.192 |
| 4.31000385330882e-89 | 2 ITPA Activated NME1      |       |       |
| 2.51604277782418e-93 | -0.51936484324734          | 0.199 | 0.316 |
| 4.48585266858274e-89 | 2 CD99 Activated NME1      |       |       |
| 3.61457017272193e-93 | 0.305123587491497          | 0.458 | 0.286 |
| 6.44441716094593e-89 | 2 SNF8 Activated NME1      |       |       |
| 4.0335529815908e-93  | 0.324114581425273          | 0.458 | 0.288 |
| 7.19142161087824e-89 | 2 ELAVL1 Activated NME1    |       |       |
| 4.68360265623676e-93 | 0.317823744729982          | 0.346 | 0.186 |
| 8.35039517580451e-89 | 2 SNRNP40 Activated NME1   |       |       |
| 6.35722081212708e-93 | 0.311097819093605          | 0.45  | 0.271 |
| 1.13342889859414e-88 | 2 ZMAT2 Activated NME1     |       |       |
| 2.5237546013855e-92  | 0.303194837425036          | 0.422 | 0.256 |
| 4.4996020788102e-88  | 2 POLR2F Activated NME1    |       |       |
| 3.27795973039544e-92 | -0.642162543193293         | 0.611 | 0.686 |
| 5.84427440332202e-88 | 2 HLA-DMA Activated NME1   |       |       |
| 3.28901441932184e-92 | 0.310722513919647          | 0.154 | 0.052 |
| 5.86398380820891e-88 | 2 TRIB3 Activated NME1     |       |       |
| 4.63166078299665e-92 | 0.346214908904382          | 0.286 | 0.142 |
| 8.25778801000472e-88 | 2 NAMPT Activated NME1     |       |       |
| 9.3910281290526e-92  | 0.305789808881122          | 0.325 | 0.175 |
| 1.67432640512879e-87 | 2 CHCHD3 Activated NME1    |       |       |
| 1.67629608406555e-91 | 0.322867281962401          | 0.362 | 0.209 |
| 2.98866828828047e-87 | 2 DAZAP1 Activated NME1    |       |       |
| 3.0985072316281e-91  | 0.308987118671241          | 0.497 | 0.328 |
| 5.52432854326974e-87 | 2 MRPS34 Activated NME1    |       |       |
| 3.21345532712758e-91 | -0.594547588919716         | 0.183 | 0.289 |
| 5.72926950273576e-87 | 2 ADAM28 Activated NME1    |       |       |

|                      |                          |             |       |
|----------------------|--------------------------|-------------|-------|
| 3.7113701246217e-91  | 0.342801637181622        | 0.371       | 0.214 |
| 6.61700179518803e-87 | 2 CCDC85B Activated NME1 |             |       |
| 7.3984528468435e-91  | 0.313010774639198        | 0.285       | 0.146 |
| 1.31907015806373e-86 | 2 COA4 Activated NME1    |             |       |
| 1.80840045818883e-90 | 0.325725436481971        | 0.329       | 0.183 |
| 3.22419717690487e-86 | 2 UQCC2 Activated NME1   |             |       |
| 2.50307129520533e-90 | 0.303277735127896        | 0.612       | 0.432 |
| 4.46272581222159e-86 | 2 EIF5 Activated NME1    |             |       |
| 7.46425057468166e-90 | 0.34484087251307         | 0.378 0.217 |       |
| 1.33080123495999e-85 | 2 NAXE Activated NME1    |             |       |
| 1.15909308596133e-89 | 0.302210510314041        | 0.362       | 0.214 |
| 2.06654706296045e-85 | 2 HDDC2 Activated NME1   |             |       |
| 1.61319715434533e-89 | 0.30745909553185         | 0.241 0.114 |       |
| 2.87616920648229e-85 | 2 BMS1 Activated NME1    |             |       |
| 1.7759576969488e-89  | 0.31868554872495         | 0.325 0.169 |       |
| 3.16635497789002e-85 | 2 PEPD Activated NME1    |             |       |
| 2.37168931140128e-89 | -0.684837881801627       | 0.691       | 0.729 |
| 4.22848487329735e-85 | 2 LIMD2 Activated NME1   |             |       |
| 2.83333920690875e-89 | 0.34453511945004         | 0.306 0.162 |       |
| 5.05156047199761e-85 | 2 CARS Activated NME1    |             |       |
| 3.6555484925161e-89  | -0.722066145409201       | 0.128       | 0.22  |
| 6.51747740730696e-85 | 2 PLAC8 Activated NME1   |             |       |
| 6.92653415384986e-89 | 0.307673227760059        | 0.391       | 0.231 |
| 1.23493177428989e-84 | 2 SNRPA1 Activated NME1  |             |       |
| 6.95029320132052e-89 | 0.307312499564864        | 0.201       | 0.083 |
| 1.23916777486344e-84 | 2 SURF6 Activated NME1   |             |       |
| 2.11505807839354e-88 | 0.30618230040059         | 0.388 0.237 |       |
| 3.77093704796785e-84 | 2 MCTS1 Activated NME1   |             |       |
| 2.44449484084794e-88 | 0.30638227128076         | 0.328 0.179 |       |
| 4.35828985174779e-84 | 2 TRMT10C Activated NME1 |             |       |
| 3.01043993416248e-88 | 0.313924677077081        | 0.345       | 0.192 |
| 5.36731335861828e-84 | 2 TMEM208 Activated NME1 |             |       |
| 5.14971314323447e-88 | -0.562742024570944       | 0.186       | 0.278 |
| 9.18142356307273e-84 | 2 GPR183 Activated NME1  |             |       |
| 5.59473408113681e-88 | 0.324072630122331        | 0.653       | 0.458 |
| 9.97485139325882e-84 | 2 SQSTM1 Activated NME1  |             |       |
| 6.71121343449876e-88 | 0.307172950852575        | 0.395       | 0.231 |
| 1.19654224323678e-83 | 2 RPL7L1 Activated NME1  |             |       |
| 7.14931388905622e-88 | -0.413193127341519       | 0.047       | 0.135 |
| 1.27465117327983e-83 | 2 ZBTB20 Activated NME1  |             |       |
| 2.40782188759865e-87 | 0.31191288932222         | 0.309 0.155 |       |
| 4.29290564339963e-83 | 2 RABGGTB Activated NME1 |             |       |
| 3.52750628997764e-87 | 0.311739508966016        | 0.374       | 0.221 |
| 6.28919096440114e-83 | 2 DCXR Activated NME1    |             |       |
| 3.72504966435747e-87 | 0.30340953646448         | 0.366 0.213 |       |
| 6.64139104658293e-83 | 2 DDX54 Activated NME1   |             |       |
| 4.78078188996488e-87 | 0.310500264968734        | 0.346       | 0.198 |
| 8.52365603161839e-83 | 2 COPS3 Activated NME1   |             |       |
| 7.05941451254977e-87 | 0.314186610225916        | 0.454       | 0.283 |
| 1.2586230134425e-82  | 2 MRPS18B Activated NME1 |             |       |

|                      |                             |       |       |
|----------------------|-----------------------------|-------|-------|
| 8.77661806686115e-87 | 0.311389842826274           | 0.378 | 0.225 |
| 1.56478323514068e-82 | 2 MORF4L2 Activated NME1    |       |       |
| 9.6752536196353e-87  | 0.329031486284082           | 0.498 | 0.308 |
| 1.72500096784478e-82 | 2 PMAIP1 Activated NME1     |       |       |
| 1.35661218020253e-86 | 0.304530742652361           | 0.319 | 0.18  |
| 2.41870385608309e-82 | 2 HARS Activated NME1       |       |       |
| 2.95655534450166e-86 | 0.306000237080375           | 0.277 | 0.137 |
| 5.27124252371201e-82 | 2 AFG3L2 Activated NME1     |       |       |
| 3.3477191302157e-86  | -0.581215195469449          | 0.362 | 0.434 |
| 5.96864843726158e-82 | 2 PLP2 Activated NME1       |       |       |
| 4.67208590482346e-86 | 0.306846632504601           | 0.258 | 0.126 |
| 8.32986195970975e-82 | 2 ZPR1 Activated NME1       |       |       |
| 1.20496959755099e-85 | -0.598959741570568          | 0.298 | 0.409 |
| 2.14834029547366e-81 | 2 ORAI2 Activated NME1      |       |       |
| 1.05370329230384e-84 | 0.321899776990327           | 0.394 | 0.228 |
| 1.87864759984852e-80 | 2 DENR Activated NME1       |       |       |
| 2.19380485144613e-84 | 0.304807794752447           | 0.353 | 0.195 |
| 3.9113346696433e-80  | 2 DNTP2 Activated NME1      |       |       |
| 2.31807857109048e-84 | 0.326072928819176           | 0.322 | 0.174 |
| 4.13290228439721e-80 | 2 ATP1A1 Activated NME1     |       |       |
| 6.51308281099462e-83 | -0.399968935028656          | 0.057 | 0.157 |
| 1.16121753437223e-78 | 2 SH2B2 Activated NME1      |       |       |
| 1.26495946488961e-82 | 0.302135725049219           | 0.285 | 0.14  |
| 2.25529622995168e-78 | 2 CFAP97 Activated NME1     |       |       |
| 8.29539804785567e-82 | 0.310263113821458           | 0.38  | 0.227 |
| 1.47898651795219e-77 | 2 PTBP1 Activated NME1      |       |       |
| 1.67903497373661e-81 | -0.573492972935058          | 0.188 | 0.296 |
| 2.993551454675e-77   | 2 PPM1K Activated NME1      |       |       |
| 3.02196235764848e-81 | -0.400967058418814          | 0.053 | 0.13  |
| 5.38785668745147e-77 | 2 DDAH2 Activated NME1      |       |       |
| 3.09686887312332e-81 | -0.474966057136603          | 0.077 | 0.183 |
| 5.52140751389156e-77 | 2 TMEM156 Activated NME1    |       |       |
| 3.8716072971762e-81  | 0.316717381621747           | 0.507 | 0.335 |
| 6.90268865013544e-77 | 2 CHMP4B Activated NME1     |       |       |
| 9.04616086546675e-81 | 0.3024417074241             | 0.393 | 0.231 |
| 1.61284002070407e-76 | 2 HNRNPA1P48 Activated NME1 |       |       |
| 6.71550143010451e-80 | -0.344910613493614          | 0.04  | 0.119 |
| 1.19730674997333e-75 | 2 CRIP1 Activated NME1      |       |       |
| 3.26520780114613e-79 | -0.540250915932803          | 0.146 | 0.246 |
| 5.82153898866343e-75 | 2 CCND3 Activated NME1      |       |       |
| 5.70087987619477e-78 | 0.304523958232879           | 0.442 | 0.277 |
| 1.01640987312677e-73 | 2 TNIP1 Activated NME1      |       |       |
| 6.69589529797897e-77 | -0.68193041104757           | 0.119 | 0.218 |
| 1.19381117267667e-72 | 2 FOS Activated NME1        |       |       |
| 1.83183674899398e-76 | 0.362729304767404           | 0.474 | 0.321 |
| 3.26598173978136e-72 | 2 ACAT2 Activated NME1      |       |       |
| 6.08081720877685e-76 | -0.569426174449419          | 0.223 | 0.332 |
| 1.08414890015282e-71 | 2 TNFRSF13C Activated NME1  |       |       |
| 1.69727732042871e-73 | -0.390367941340936          | 0.052 | 0.136 |
| 3.02607573459234e-69 | 2 CCNG2 Activated NME1      |       |       |



|                      |                    |                         |       |
|----------------------|--------------------|-------------------------|-------|
| 5.63288439714118e-73 | -0.344891045554967 | 0.065                   | 0.153 |
| 1.0042869591663e-68  | 2                  | FL0T1 Activated NME1    |       |
| 6.50360342988686e-73 | -0.504023513027617 | 0.236                   | 0.339 |
| 1.15952745551453e-68 | 2                  | CCNDBP1 Activated NME1  |       |
| 4.08330916403259e-72 | -0.587681392912288 | 0.452                   | 0.519 |
| 7.28013190855371e-68 | 2                  | BANK1 Activated NME1    |       |
| 2.82430140225322e-71 | -0.507345837152341 | 0.184                   | 0.284 |
| 5.03544697007727e-67 | 2                  | RSRP1 Activated NME1    |       |
| 4.30589662297349e-71 | -0.469434064980145 | 0.161                   | 0.259 |
| 7.67698308909943e-67 | 2                  | SH3KBP1 Activated NME1  |       |
| 1.53398895335878e-69 | -0.555935443979036 | 0.148                   | 0.242 |
| 2.73494890494337e-65 | 2                  | IL4R Activated NME1     |       |
| 1.99936939259046e-69 | -0.56149373074984  | 0.394                   | 0.475 |
| 3.56467569004953e-65 | 2                  | ITM2B Activated NME1    |       |
| 1.15336617178451e-68 | -0.517105074236409 | 0.194                   | 0.309 |
| 2.0563365476746e-64  | 2                  | TCF4 Activated NME1     |       |
| 1.91390943824535e-68 | -0.383009043147755 | 0.064                   | 0.153 |
| 3.41230913744763e-64 | 2                  | HSH2D Activated NME1    |       |
| 2.67605967663059e-68 | -0.494363842257928 | 0.191                   | 0.288 |
| 4.77114679746468e-64 | 2                  | STK17B Activated NME1   |       |
| 5.28754622244559e-68 | 0.313409599548179  | 0.286                   | 0.15  |
| 9.42716615999825e-64 | 2                  | MARCKS Activated NME1   |       |
| 5.02220485165694e-67 | -0.410179906942766 | 0.093                   | 0.176 |
| 8.95408903001916e-63 | 2                  | BNIP3L Activated NME1   |       |
| 1.25854994394102e-66 | 0.317190569028391  | 0.345                   | 0.203 |
| 2.24386869505245e-62 | 2                  | HMGCS1 Activated NME1   |       |
| 7.0562470025491e-66  | -0.42305886958187  | 0.088                   | 0.175 |
| 1.25805827808448e-61 | 2                  | SNX10 Activated NME1    |       |
| 3.01175450705413e-65 | 0.342675594760767  | 0.21                    | 0.123 |
| 5.3696571106268e-61  | 2                  | PHGDH Activated NME1    |       |
| 5.84733721492309e-65 | -0.303645957591996 | 0.046                   | 0.125 |
| 1.04252175204864e-60 | 2                  | ABI3 Activated NME1     |       |
| 5.04148403891268e-64 | 0.311311929807175  | 0.334                   | 0.197 |
| 8.98846189297742e-60 | 2                  | C19orf48 Activated NME1 |       |
| 8.16093209727679e-64 | -0.506761514618367 | 0.214                   | 0.302 |
| 1.45501258362348e-59 | 2                  | BCL11A Activated NME1   |       |
| 9.28227454866376e-63 | -1.46060819608233  | 0.16                    | 0.222 |
| 1.65493672928126e-58 | 2                  | IGHG1 Activated NME1    |       |
| 1.30420034347849e-62 | -0.322370030826796 | 0.035                   | 0.101 |
| 2.3252587923878e-58  | 2                  | ABTB1 Activated NME1    |       |
| 3.49553890025574e-62 | -0.485296796577855 | 0.076                   | 0.15  |
| 6.23219630526596e-58 | 2                  | DUSP1 Activated NME1    |       |
| 4.66029638862682e-62 | -0.44291977505239  | 0.16                    | 0.251 |
| 8.30884243128276e-58 | 2                  | NCOA3 Activated NME1    |       |
| 9.45770321819032e-62 | -0.376411554511344 | 0.048                   | 0.106 |
| 1.68621390677115e-57 | 2                  | RHOC Activated NME1     |       |
| 2.7691609926832e-61  | -0.30056296263375  | 0.49                    | 0.505 |
| 4.93713713385488e-57 | 2                  | HLA-DRB5 Activated NME1 |       |
| 7.23039808382609e-61 | -0.41816154232751  | 0.652                   | 0.702 |
| 1.28910767436535e-56 | 2                  | HLA-DQB1 Activated NME1 |       |

|                      |                             |       |       |
|----------------------|-----------------------------|-------|-------|
| 7.49790436965463e-61 | -0.530498302240063          | 0.137 | 0.213 |
| 1.33680137006572e-56 | 2 PRKCB Activated NME1      |       |       |
| 2.05880945480255e-60 | -0.413110516741047          | 0.174 | 0.269 |
| 3.67065137696747e-56 | 2 ILK Activated NME1        |       |       |
| 5.9909308895868e-59  | -0.54551605224324           | 0.189 | 0.264 |
| 1.06812306830443e-54 | 2 MDM4 Activated NME1       |       |       |
| 7.54817852135911e-59 | -0.968777845396706          | 0.126 | 0.221 |
| 1.34576474857312e-54 | 2 PLCG2 Activated NME1      |       |       |
| 8.48352267398016e-59 | -0.459506996689824          | 0.162 | 0.239 |
| 1.51252725754392e-54 | 2 HSD17B11 Activated NME1   |       |       |
| 1.00424810996935e-58 | -0.424566355447409          | 0.186 | 0.275 |
| 1.79047395526436e-54 | 2 GRN Activated NME1        |       |       |
| 2.66809730242344e-58 | -0.433712238728308          | 0.17  | 0.259 |
| 4.75695068049075e-54 | 2 WIPF1 Activated NME1      |       |       |
| 4.70960155470062e-58 | -0.432666238828936          | 0.167 | 0.249 |
| 8.39674861187573e-54 | 2 ARHGAP45 Activated NME1   |       |       |
| 1.51866109414541e-57 | -0.433818577236352          | 0.131 | 0.21  |
| 2.70762086475186e-53 | 2 TRIM38 Activated NME1     |       |       |
| 3.41703291985037e-57 | -0.475480426328181          | 0.229 | 0.305 |
| 6.09222799280123e-53 | 2 PDLIM1 Activated NME1     |       |       |
| 9.78400065971045e-57 | -0.498792975275297          | 0.683 | 0.701 |
| 1.74438947761978e-52 | 2 CCNI Activated NME1       |       |       |
| 1.94599004536246e-55 | -0.505058385651795          | 0.302 | 0.366 |
| 3.46950565187673e-51 | 2 ARID5B Activated NME1     |       |       |
| 6.72296856650396e-55 | -0.443663878748888          | 0.188 | 0.276 |
| 1.19863806572199e-50 | 2 ALOX5AP Activated NME1    |       |       |
| 1.26749506555486e-54 | -0.372761620091331          | 0.098 | 0.185 |
| 2.25981695237776e-50 | 2 SYK Activated NME1        |       |       |
| 5.95326010637743e-54 | -0.529059608467219          | 0.175 | 0.245 |
| 1.06140674436603e-49 | 2 CD55 Activated NME1       |       |       |
| 1.05194706134185e-53 | -1.52080869088947           | 0.279 | 0.305 |
| 1.87551641566638e-49 | 2 HMGB2 Activated NME1      |       |       |
| 2.08458429752646e-53 | -0.314441471157427          | 0.04  | 0.105 |
| 3.71660534405992e-49 | 2 MX1 Activated NME1        |       |       |
| 2.82514853462855e-53 | -0.459893462612256          | 0.319 | 0.399 |
| 5.03695732238924e-49 | 2 SH3BGR1 Activated NME1    |       |       |
| 5.9340470082253e-53  | -0.387755876715906          | 0.93  | 0.899 |
| 1.05798124109649e-48 | 2 MYL6 Activated NME1       |       |       |
| 8.56589955192965e-53 | -0.333098077767513          | 0.078 | 0.157 |
| 1.52721423111354e-48 | 2 PTPN18 Activated NME1     |       |       |
| 8.71084185273901e-53 | -0.506621643206216          | 0.397 | 0.451 |
| 1.55305599392484e-48 | 2 KLF6 Activated NME1       |       |       |
| 2.97382727673226e-52 | -0.353834126028578          | 0.082 | 0.151 |
| 5.30203665168595e-48 | 2 GNB5 Activated NME1       |       |       |
| 1.07248328972786e-51 | -0.497646611935533          | 0.341 | 0.428 |
| 1.91213045725581e-47 | 2 AC114760.2 Activated NME1 |       |       |
| 5.26697322105052e-51 | -0.400907116217335          | 0.206 | 0.285 |
| 9.39048655581098e-47 | 2 CCNG1 Activated NME1      |       |       |
| 1.52507767544152e-50 | -0.303753430195746          | 0.077 | 0.153 |
| 2.71906098754469e-46 | 2 P2RY8 Activated NME1      |       |       |

|                      |                            |       |       |
|----------------------|----------------------------|-------|-------|
| 5.20699427512772e-50 | -0.317331895255215         | 0.044 | 0.106 |
| 9.28355009312521e-46 | 2 CENPM Activated NME1     |       |       |
| 1.38075349110524e-49 | -0.3849679879503           | 0.138 | 0.216 |
| 2.46174539929152e-45 | 2 MIS18BP1 Activated NME1  |       |       |
| 1.60453762432336e-49 | -0.401019446873082         | 0.125 | 0.22  |
| 2.86073013040612e-45 | 2 ADA Activated NME1       |       |       |
| 2.13201540885037e-49 | -0.536497611249029         | 0.246 | 0.302 |
| 3.80117027243933e-45 | 2 LINC00926 Activated NME1 |       |       |
| 2.57367027141218e-49 | -0.439077425474015         | 0.225 | 0.308 |
| 4.58859672690078e-45 | 2 ITS2 Activated NME1      |       |       |
| 9.99828794024086e-49 | -0.300000827498627         | 0.049 | 0.111 |
| 1.78259475686554e-44 | 2 SCIMP Activated NME1     |       |       |
| 3.34145433633086e-48 | -0.465346506002241         | 0.218 | 0.286 |
| 5.95747893624429e-44 | 2 RNASET2 Activated NME1   |       |       |
| 4.07757659199629e-48 | -0.459317686679048         | 0.445 | 0.497 |
| 7.26991130587019e-44 | 2 ANKRD12 Activated NME1   |       |       |
| 4.38102430690772e-48 | -0.505946864318186         | 0.829 | 0.812 |
| 7.81092823678577e-44 | 2 COR01A Activated NME1    |       |       |
| 4.38192060118831e-48 | -0.311995270557337         | 0.084 | 0.153 |
| 7.81252623985864e-44 | 2 ANKRD13A Activated NME1  |       |       |
| 4.92386102383622e-48 | -0.477805781014665         | 0.601 | 0.624 |
| 8.77875181939759e-44 | 2 ARPC1B Activated NME1    |       |       |
| 7.38938649177735e-48 | -0.488570322578035         | 0.341 | 0.409 |
| 1.31745371761898e-43 | 2 MBD4 Activated NME1      |       |       |
| 1.05336643706519e-47 | -0.361361165544466         | 0.106 | 0.18  |
| 1.87804702064353e-43 | 2 IRF7 Activated NME1      |       |       |
| 1.36454808483637e-47 | -0.315729785602007         | 0.074 | 0.154 |
| 2.43285278045476e-43 | 2 SEC14L1 Activated NME1   |       |       |
| 1.59541005467127e-47 | -0.348163181745099         | 0.996 | 0.977 |
| 2.84445658647342e-43 | 2 MT-CO2 Activated NME1    |       |       |
| 2.40790476175743e-47 | -0.41563008743674          | 0.189 | 0.264 |
| 4.29305339973732e-43 | 2 LYSMD2 Activated NME1    |       |       |
| 5.21641995699913e-47 | -0.312345616473222         | 0.049 | 0.121 |
| 9.30035514133374e-43 | 2 TNFRSF17 Activated NME1  |       |       |
| 8.12328006227532e-47 | -0.594525674084326         | 0.421 | 0.459 |
| 1.44829960230307e-42 | 2 JUNB Activated NME1      |       |       |
| 9.98076782968524e-47 | -0.467429854399914         | 0.659 | 0.671 |
| 1.77947109635458e-42 | 2 SNX3 Activated NME1      |       |       |
| 1.08538001651318e-46 | -0.382349690248875         | 0.196 | 0.282 |
| 1.93512403144136e-42 | 2 POU2AF1 Activated NME1   |       |       |
| 1.7300734296859e-46  | -0.44910689057068          | 0.364 | 0.43  |
| 3.08454791778699e-42 | 2 GABARAPL2 Activated NME1 |       |       |
| 1.90974987388626e-46 | -0.373757396706587         | 0.167 | 0.215 |
| 3.40489305015182e-42 | 2 MGST3 Activated NME1     |       |       |
| 3.13723030913858e-46 | -0.352234846926084         | 0.101 | 0.172 |
| 5.59336791816317e-42 | 2 DEF8 Activated NME1      |       |       |
| 6.17292780624347e-46 | -0.404921719014291         | 0.254 | 0.328 |
| 1.10057129857515e-41 | 2 IGBP1 Activated NME1     |       |       |
| 1.06448140881949e-45 | -0.31362594627171          | 0.092 | 0.167 |
| 1.89786390378427e-41 | 2 IL10RA Activated NME1    |       |       |

|                      |                           |       |       |
|----------------------|---------------------------|-------|-------|
| 1.4653658335514e-45  | -0.480206359170144        | 0.255 | 0.319 |
| 2.61260074463878e-41 | 2 PSIP1 Activated NME1    |       |       |
| 9.38699915774046e-45 | -0.330788339893162        | 0.111 | 0.19  |
| 1.67360807983355e-40 | 2 RASGRP3 Activated NME1  |       |       |
| 9.90052577979769e-45 | -0.338237859365308        | 0.081 | 0.146 |
| 1.76516474128013e-40 | 2 ADD3 Activated NME1     |       |       |
| 1.73842491599651e-44 | -0.410631250277086        | 0.228 | 0.292 |
| 3.09943778273018e-40 | 2 PLEKHF2 Activated NME1  |       |       |
| 2.07078161352817e-44 | -0.32446394604143         | 0.087 | 0.147 |
| 3.69199653875937e-40 | 2 MYO1G Activated NME1    |       |       |
| 4.46941390976989e-44 | -0.447647048000217        | 0.451 | 0.498 |
| 7.96851805972873e-40 | 2 SP100 Activated NME1    |       |       |
| 8.79229752111571e-44 | -0.31535500027963         | 0.075 | 0.136 |
| 1.56757872503972e-39 | 2 SIPA1 Activated NME1    |       |       |
| 1.14460758212195e-43 | -0.353584884042457        | 0.049 | 0.117 |
| 2.04072085816523e-39 | 2 CD9 Activated NME1      |       |       |
| 1.30970718246421e-43 | -0.312844052348281        | 0.106 | 0.176 |
| 2.33507693561545e-39 | 2 CYB5R3 Activated NME1   |       |       |
| 2.50858983579832e-43 | -0.434810247853904        | 0.197 | 0.271 |
| 4.47256481824482e-39 | 2 CD22 Activated NME1     |       |       |
| 5.34534972597438e-43 | -0.36829653717428         | 0.133 | 0.189 |
| 9.53022402643972e-39 | 2 MBP Activated NME1      |       |       |
| 5.53995380036069e-43 | -0.34993763393441         | 0.062 | 0.11  |
| 9.87718363066307e-39 | 2 C1orf162 Activated NME1 |       |       |
| 1.51108290095256e-42 | -0.45116483494666         | 0.693 | 0.704 |
| 2.69410970410833e-38 | 2 COMMD6 Activated NME1   |       |       |
| 2.16263447275979e-41 | -0.350631554155338        | 0.126 | 0.189 |
| 3.85576100148343e-37 | 2 INPP5D Activated NME1   |       |       |
| 4.05058945677043e-41 | -0.418476427347159        | 0.266 | 0.337 |
| 7.22179594247601e-37 | 2 TSP0 Activated NME1     |       |       |
| 1.14615334356398e-40 | -0.311133735828624        | 0.09  | 0.154 |
| 2.04347679624021e-36 | 2 SPSB3 Activated NME1    |       |       |
| 1.70721442586062e-40 | -0.43434606838819         | 0.439 | 0.497 |
| 3.0437925998669e-36  | 2 RAC2 Activated NME1     |       |       |
| 2.42076823958651e-40 | -0.390507392732972        | 0.072 | 0.116 |
| 4.31598769435879e-36 | 2 C1orf56 Activated NME1  |       |       |
| 3.30175609464785e-40 | -0.65878181536583         | 0.142 | 0.195 |
| 5.88670094114765e-36 | 2 PTTG1 Activated NME1    |       |       |
| 3.91155314694661e-40 | -0.44609757482205         | 0.231 | 0.291 |
| 6.97390810569112e-36 | 2 SP110 Activated NME1    |       |       |
| 4.03322194387121e-40 | -0.372860482119963        | 0.115 | 0.194 |
| 7.19083140372798e-36 | 2 P2RX5 Activated NME1    |       |       |
| 5.59110055759143e-40 | -0.302560944500337        | 0.074 | 0.133 |
| 9.96837318412976e-36 | 2 AMFR Activated NME1     |       |       |
| 8.88855448419422e-40 | -0.507865203054649        | 0.336 | 0.354 |
| 1.58474037898699e-35 | 2 TXNIP Activated NME1    |       |       |
| 1.43986693368574e-39 | -0.342439589550795        | 0.151 | 0.224 |
| 2.56713875606831e-35 | 2 PNKD Activated NME1     |       |       |
| 3.24192807475611e-39 | -0.313460692871297        | 0.076 | 0.141 |
| 5.78003356448266e-35 | 2 PLEKHA2 Activated NME1  |       |       |

|                      |                            |       |       |
|----------------------|----------------------------|-------|-------|
| 8.77052592052494e-39 | -0.365347088922044         | 0.192 | 0.268 |
| 1.56369706637039e-34 | 2 CCDC69 Activated NME1    |       |       |
| 1.05965255279857e-38 | -0.483122569144644         | 0.294 | 0.352 |
| 1.88925453638458e-34 | 2 BIRC3 Activated NME1     |       |       |
| 2.57737185331737e-38 | -0.411604442447002         | 0.138 | 0.196 |
| 4.59519627727953e-34 | 2 S1PR4 Activated NME1     |       |       |
| 5.97527710638692e-38 | -0.315621586747153         | 0.074 | 0.128 |
| 1.06533215529772e-33 | 2 RNF213 Activated NME1    |       |       |
| 8.25510520135624e-38 | -0.332983670587617         | 0.189 | 0.252 |
| 1.4718027063498e-33  | 2 TPM4 Activated NME1      |       |       |
| 1.7113752152419e-37  | -3.12081445194393          | 0.447 | 0.451 |
| 3.05121087125479e-33 | 2 IGHG3 Activated NME1     |       |       |
| 2.56873284742179e-37 | -0.34607713579383          | 0.167 | 0.241 |
| 4.5797937936683e-33  | 2 CPNE3 Activated NME1     |       |       |
| 3.38988777202763e-37 | -0.402170768887498         | 0.279 | 0.34  |
| 6.04383090874806e-33 | 2 FAM96A Activated NME1    |       |       |
| 9.6601002140413e-37  | -0.354859731114949         | 0.151 | 0.208 |
| 1.72229926716142e-32 | 2 BIN1 Activated NME1      |       |       |
| 1.34215832876977e-36 | -0.36921948164465          | 0.143 | 0.21  |
| 2.39293408436362e-32 | 2 IRF1 Activated NME1      |       |       |
| 3.48226626743979e-36 | -0.469600438587105         | 0.561 | 0.571 |
| 6.2085325282184e-32  | 2 VIM Activated NME1       |       |       |
| 4.15151699513343e-36 | -0.3427301088288           | 0.146 | 0.213 |
| 7.40173965062339e-32 | 2 CAT Activated NME1       |       |       |
| 5.44798510540312e-36 | -0.3291768742892           | 0.066 | 0.114 |
| 9.71321264442321e-32 | 2 LINC02397 Activated NME1 |       |       |
| 7.85592226666223e-36 | -0.385888669792185         | 0.207 | 0.271 |
| 1.40063238092321e-31 | 2 RBM6 Activated NME1      |       |       |
| 1.11877659957558e-35 | -0.360011365371689         | 0.15  | 0.214 |
| 1.9946667993833e-31  | 2 SNHG25 Activated NME1    |       |       |
| 1.5262688392932e-35  | -0.469001943234088         | 0.301 | 0.342 |
| 2.72118471357584e-31 | 2 HVCN1 Activated NME1     |       |       |
| 5.11727362321912e-35 | -0.347896337139685         | 0.237 | 0.308 |
| 9.12358714283736e-31 | 2 CDK2AP2 Activated NME1   |       |       |
| 6.44559189444716e-35 | -0.344748081781178         | 0.109 | 0.152 |
| 1.14918457886098e-30 | 2 ARRDC2 Activated NME1    |       |       |
| 6.50137236861857e-35 | -0.397565769451709         | 0.368 | 0.424 |
| 1.159129679601e-30   | 2 CTSH Activated NME1      |       |       |
| 6.78236596942393e-34 | -0.351826292029161         | 0.163 | 0.218 |
| 1.20922802868859e-29 | 2 WASHC4 Activated NME1    |       |       |
| 2.02716418867201e-33 | -0.479381293906503         | 0.29  | 0.343 |
| 3.61423103198332e-29 | 2 IER2 Activated NME1      |       |       |
| 4.53207018378423e-33 | -0.303267356430779         | 0.101 | 0.146 |
| 8.08022793066891e-29 | 2 LY9 Activated NME1       |       |       |
| 7.44317980688123e-33 | -0.38717363901758          | 0.28  | 0.338 |
| 1.32704452776886e-28 | 2 BPTF Activated NME1      |       |       |
| 7.81981692236436e-33 | -0.397326945437189         | 0.233 | 0.279 |
| 1.39419515908834e-28 | 2 TNRC6B Activated NME1    |       |       |
| 2.65141663503733e-32 | -0.313164505505768         | 0.144 | 0.199 |
| 4.72721071860805e-28 | 2 CYTH1 Activated NME1     |       |       |

|                      |                           |       |       |
|----------------------|---------------------------|-------|-------|
| 3.69528813421855e-32 | -0.383748439411206        | 0.35  | 0.393 |
| 6.58832921449825e-28 | 2 ARL6IP5 Activated NME1  |       |       |
| 6.20824862731377e-32 | -0.405149646358088        | 0.599 | 0.617 |
| 1.10686864776377e-27 | 2 PNISR Activated NME1    |       |       |
| 8.52405285598723e-32 | -0.397172944972668        | 0.49  | 0.494 |
| 1.51975338369396e-27 | 2 FXYD5 Activated NME1    |       |       |
| 1.08182876700232e-31 | -0.319191173908665        | 0.092 | 0.152 |
| 1.92879250868844e-27 | 2 TAGAP Activated NME1    |       |       |
| 1.45887530012822e-31 | -0.300104893383818        | 0.125 | 0.182 |
| 2.6010287725986e-27  | 2 RGS19 Activated NME1    |       |       |
| 6.52053763143201e-31 | -0.342325038844442        | 0.227 | 0.283 |
| 1.16254665430801e-26 | 2 TANK Activated NME1     |       |       |
| 1.09675362460162e-30 | -0.37453233039427         | 0.461 | 0.507 |
| 1.95540203730222e-26 | 2 PSMB9 Activated NME1    |       |       |
| 1.79447845979712e-30 | -0.319007038450696        | 0.178 | 0.229 |
| 3.19937564597229e-26 | 2 MAGED2 Activated NME1   |       |       |
| 1.21594651446495e-29 | -0.314255110532397        | 0.172 | 0.227 |
| 2.16791104063956e-25 | 2 SKAP2 Activated NME1    |       |       |
| 1.68211809809251e-29 | -0.345311836482737        | 0.251 | 0.295 |
| 2.99904835708914e-25 | 2 YWHAH Activated NME1    |       |       |
| 2.36772527553935e-29 | -0.318534692336489        | 0.941 | 0.915 |
| 4.2214173937591e-25  | 2 PFDN5 Activated NME1    |       |       |
| 4.3093382804343e-29  | -0.323936297988108        | 0.142 | 0.19  |
| 7.68311922018631e-25 | 2 ANKRD44 Activated NME1  |       |       |
| 9.67052489927332e-29 | -0.330219019406863        | 0.186 | 0.245 |
| 1.72415788429144e-24 | 2 SP140 Activated NME1    |       |       |
| 3.51696560929258e-28 | -0.323457196708764        | 0.17  | 0.233 |
| 6.27039798480773e-24 | 2 UBE2G1 Activated NME1   |       |       |
| 5.84117861557303e-28 | -0.391659021271962        | 0.261 | 0.32  |
| 1.04142373537052e-23 | 2 HMGN3 Activated NME1    |       |       |
| 6.3527026452084e-28  | -0.365460243315971        | 0.124 | 0.174 |
| 1.13262335461421e-23 | 2 SMC4 Activated NME1     |       |       |
| 1.26022983218895e-27 | -0.334146766920466        | 0.205 | 0.259 |
| 2.24686376780968e-23 | 2 PRMT2 Activated NME1    |       |       |
| 1.61329530205691e-27 | -0.472588132115282        | 0.232 | 0.272 |
| 2.87634419403726e-23 | 2 JUN Activated NME1      |       |       |
| 1.39711207496666e-26 | -0.343366368131593        | 0.278 | 0.329 |
| 2.49091111845806e-22 | 2 BLNK Activated NME1     |       |       |
| 1.64531586177576e-26 | -0.406655046357424        | 0.317 | 0.351 |
| 2.93343364996001e-22 | 2 TRAF3IP3 Activated NME1 |       |       |
| 3.70184041433674e-26 | -0.347473108901451        | 0.237 | 0.288 |
| 6.60001127472098e-22 | 2 LAT2 Activated NME1     |       |       |
| 4.52890246169904e-26 | -0.331161782910938        | 0.147 | 0.2   |
| 8.07458019896322e-22 | 2 FAM129C Activated NME1  |       |       |
| 6.71629474163954e-26 | -0.34312182057263         | 0.343 | 0.388 |
| 1.19744818948691e-21 | 2 JAK1 Activated NME1     |       |       |
| 1.7583584323904e-25  | -0.36519885409691         | 0.436 | 0.462 |
| 3.13497724910884e-21 | 2 SWAP70 Activated NME1   |       |       |
| 1.81171142417104e-25 | -0.325899955594766        | 0.19  | 0.241 |
| 3.23010029815455e-21 | 2 DSTN Activated NME1     |       |       |

|                      |                           |       |       |
|----------------------|---------------------------|-------|-------|
| 2.26520984230689e-25 | -0.315387431317637        | 0.207 | 0.249 |
| 4.03864262784895e-21 | 2 GCC2 Activated NME1     |       |       |
| 5.08037201445766e-25 | -0.354844631814005        | 0.495 | 0.518 |
| 9.05779526457657e-21 | 2 VAMP2 Activated NME1    |       |       |
| 5.66051711458664e-25 | -0.331779028107855        | 0.216 | 0.258 |
| 1.00921359635965e-20 | 2 PRDM2 Activated NME1    |       |       |
| 6.38792398160417e-25 | -0.386909873660564        | 0.429 | 0.446 |
| 1.13890296668021e-20 | 2 ANXA2 Activated NME1    |       |       |
| 6.43265252908309e-25 | -0.386798069918618        | 0.867 | 0.699 |
| 1.14687761941022e-20 | 2 HMGN2 Activated NME1    |       |       |
| 1.01765411285426e-24 | -0.304315504241698        | 0.167 | 0.209 |
| 1.81437551780787e-20 | 2 RALGPS2 Activated NME1  |       |       |
| 1.16148696112437e-24 | -0.318969978847153        | 0.222 | 0.267 |
| 2.07081510298864e-20 | 2 DAPP1 Activated NME1    |       |       |
| 1.75563190567646e-24 | -0.363193474351609        | 0.451 | 0.489 |
| 3.13011612463055e-20 | 2 GMFG Activated NME1     |       |       |
| 2.81050096332946e-24 | -0.344429381622036        | 0.511 | 0.533 |
| 5.01084216752009e-20 | 2 PAIP2 Activated NME1    |       |       |
| 3.11542688825835e-24 | -0.31416080615279         | 0.196 | 0.246 |
| 5.5544945990758e-20  | 2 DRAM2 Activated NME1    |       |       |
| 5.17536275225738e-24 | -0.300564034893864        | 0.202 | 0.254 |
| 9.22715425099969e-20 | 2 PPP2R5C Activated NME1  |       |       |
| 7.13808919741921e-24 | -0.301887672018433        | 0.102 | 0.165 |
| 1.27264992300787e-19 | 2 KIAA0040 Activated NME1 |       |       |
| 9.4906115986882e-24  | -0.310602465186689        | 0.164 | 0.203 |
| 1.69208114193012e-19 | 2 CLK1 Activated NME1     |       |       |
| 1.10557686114991e-23 | -0.312859778393487        | 0.228 | 0.275 |
| 1.97113298574417e-19 | 2 SEPT9 Activated NME1    |       |       |
| 2.96019002948027e-23 | -0.302084843668533        | 0.146 | 0.195 |
| 5.27772280356038e-19 | 2 LBR Activated NME1      |       |       |
| 7.39916908469814e-23 | -0.308433585670709        | 0.385 | 0.427 |
| 1.31919785611083e-18 | 2 ECH1 Activated NME1     |       |       |
| 3.89241069418539e-22 | -0.319157488619477        | 0.287 | 0.335 |
| 6.93977902666312e-18 | 2 CCM2 Activated NME1     |       |       |
| 5.8808236115339e-22  | -0.329729029314771        | 0.16  | 0.196 |
| 1.04849204170038e-17 | 2 DNMT1 Activated NME1    |       |       |
| 1.43158894441085e-21 | -0.310914660329315        | 0.282 | 0.317 |
| 2.55237992899011e-17 | 2 SPI1 Activated NME1     |       |       |
| 2.44392295284508e-21 | -0.312271153421648        | 0.212 | 0.252 |
| 4.35727023262749e-17 | 2 OFD1 Activated NME1     |       |       |
| 5.0535294508006e-21  | -0.315235504732349        | 0.273 | 0.316 |
| 9.00993765783239e-17 | 2 IL16 Activated NME1     |       |       |
| 1.0277017478395e-20  | -1.29325869747352         | 0.936 | 0.925 |
| 1.83228944622305e-16 | 2 IGKC Activated NME1     |       |       |
| 1.15667308031669e-20 | -0.334967192713129        | 0.369 | 0.389 |
| 2.06223243489662e-16 | 2 PSAP Activated NME1     |       |       |
| 1.77122777689937e-20 | -0.343784232171417        | 0.598 | 0.629 |
| 3.15792200343388e-16 | 2 HLA-DMB Activated NME1  |       |       |
| 3.82263605486427e-20 | -0.33096088268511         | 0.233 | 0.279 |
| 6.81537782221752e-16 | 2 ITGAE Activated NME1    |       |       |

|                      |                            |       |       |
|----------------------|----------------------------|-------|-------|
| 7.17379048169615e-20 | -2.30043507428884          | 0.08  | 0.131 |
| 1.27901510498161e-15 | 2 IGHG2 Activated NME1     |       |       |
| 2.80081486524063e-19 | -0.427220455801364         | 0.82  | 0.782 |
| 4.99357282323752e-15 | 2 ACTG1 Activated NME1     |       |       |
| 1.70836579734804e-18 | -0.400011235776471         | 0.492 | 0.492 |
| 3.04584538009182e-14 | 2 C4orf3 Activated NME1    |       |       |
| 2.70752572410596e-18 | -0.301476833658515         | 0.74  | 0.721 |
| 4.82724761350852e-14 | 2 SRSF5 Activated NME1     |       |       |
| 3.4571974383303e-18  | -0.301444165320141         | 0.184 | 0.201 |
| 6.1638373127991e-14  | 2 PPP3CA Activated NME1    |       |       |
| 5.1299397247337e-18  | -0.307099832105195         | 0.964 | 0.937 |
| 9.14616953522771e-14 | 2 H3F3A Activated NME1     |       |       |
| 1.77654639655355e-17 | -0.334504713607671         | 0.417 | 0.431 |
| 3.16740457041533e-13 | 2 IRF8 Activated NME1      |       |       |
| 2.78174119482017e-17 | -1.96407649488558          | 0.229 | 0.245 |
| 4.95956637624488e-13 | 2 IGHG4 Activated NME1     |       |       |
| 4.0201612759378e-17  | -0.334518647539581         | 0.345 | 0.368 |
| 7.1675455388695e-13  | 2 SNAP23 Activated NME1    |       |       |
| 5.44744066460871e-17 | -0.324844722456488         | 0.24  | 0.249 |
| 9.71224196093087e-13 | 2 TNFRSF13B Activated NME1 |       |       |
| 7.26695739383096e-17 | -0.447110707044216         | 0.358 | 0.36  |
| 1.29562583374612e-12 | 2 H2AFV Activated NME1     |       |       |
| 1.4085073889815e-16  | -0.483836173966986         | 0.964 | 0.928 |
| 2.51122782381512e-12 | 2 HMGB1 Activated NME1     |       |       |
| 1.5183080279374e-16  | -0.309143929549269         | 0.333 | 0.361 |
| 2.70699138300959e-12 | 2 TMEM243 Activated NME1   |       |       |
| 1.77735776485387e-16 | -0.333886152241812         | 0.451 | 0.456 |
| 3.16885115895796e-12 | 2 CTSS Activated NME1      |       |       |
| 4.6473605689216e-16  | -0.470714725002935         | 0.976 | 0.928 |
| 8.28577915833032e-12 | 2 SERF2 Activated NME1     |       |       |
| 9.4727484823466e-16  | -1.33719254152411          | 0.439 | 0.42  |
| 1.68889632691757e-11 | 2 HIST1H4C Activated NME1  |       |       |
| 6.8954490798643e-15  | -0.306942887788435         | 0.195 | 0.221 |
| 1.22938961644901e-10 | 2 NANS Activated NME1      |       |       |
| 1.13824885200955e-14 | -0.31844586177574          | 0.346 | 0.402 |
| 2.02938387824783e-10 | 2 CSTB Activated NME1      |       |       |
| 1.59359143388835e-14 | -0.304752145757468         | 0.481 | 0.477 |
| 2.84121416747953e-10 | 2 SSR2 Activated NME1      |       |       |
| 4.144187756776e-12   | -0.353760845374357         | 0.71  | 0.673 |
| 7.38867238525558e-08 | 2 TAGLN2 Activated NME1    |       |       |
| 7.22625753609454e-12 | -0.347329246316132         | 0.611 | 0.573 |
| 1.2883694561103e-07  | 2 SARAF Activated NME1     |       |       |
| 2.71777626681081e-11 | -0.564655190452624         | 0.716 | 0.649 |
| 4.845523306097e-07   | 2 TCL1A Activated NME1     |       |       |
| 1.04704997956577e-10 | -0.30745214828717          | 0.64  | 0.618 |
| 1.86678540856782e-06 | 2 IFI16 Activated NME1     |       |       |
| 9.73303490475578e-10 | -0.302639442606208         | 0.923 | 0.863 |
| 1.73530279316891e-05 | 2 ARPC3 Activated NME1     |       |       |
| 1.26790925790234e-09 | -0.321939262255053         | 0.258 | 0.252 |
| 2.26055541591408e-05 | 2 FCMR Activated NME1      |       |       |



|                       |                           |          |       |       |        |
|-----------------------|---------------------------|----------|-------|-------|--------|
| 5.87894962249768e-09  | -0.350458372886502        | 0.382    | 0.374 |       |        |
| 0.000104815792819511  | 2 ACADM Activated NME1    |          |       |       |        |
| 1.17586311047708e-08  | -1.790334962483           | 0.634    | 0.646 |       |        |
| 0.000209644633966958  | 2 IGLC2 Activated NME1    |          |       |       |        |
| 1.50493839350038e-08  | -0.439006078583126        | 0.635    | 0.583 |       |        |
| 0.000268315466177183  | 2 MARCKSL1 Activated NME1 |          |       |       |        |
| 1.38573348859247e-07  | -0.324177052704794        | 0.463    | 0.419 |       |        |
| 0.00247062423681152   | 2 DEK Activated NME1      |          |       |       |        |
| 0.00125607773535111   | -1.0929631922858          | 0.475    | 0.424 | 1     | 2      |
|                       | IGLC3 Activated NME1      |          |       |       |        |
| 0                     | 1.51383922834952          | 0.866    | 0.433 | 0     | 3      |
| Memory 3              |                           |          |       |       | S100A6 |
| 0                     | 1.42581374466845          | 0.92     | 0.542 | 0     | 3      |
| Memory 3              |                           |          |       |       | VIM    |
| 0                     | 1.18886742022012          | 0.494    | 0.132 | 0     | 3      |
| Memory 3              |                           |          |       |       | LMNA   |
| 0                     | 0.92033568397809          | 0.739    | 0.421 | 0     | 3      |
| Memory 3              |                           |          |       |       | ANXA2  |
| 0                     | 0.785753280141066         |          | 0.948 | 0.746 | 0      |
| Memory 3              |                           |          |       |       | 3      |
| 0                     | 0.43339459230157          | 1        | 0.999 | 0     | 3      |
| Memory 3              |                           |          |       |       | EEF1A1 |
| 0                     | 0.342451045812923         |          | 1     | 0.999 | 0      |
| RPLP1                 | Memory 3                  |          |       |       | 3      |
| 0                     | -1.22526433615044         |          | 0.973 | 0.99  | 0      |
| CD74                  | Memory 3                  |          |       |       | 3      |
| 0                     | -1.33391071858181         |          | 0.846 | 0.954 | 0      |
| HLA-DRA               | Memory 3                  |          |       |       | 3      |
| 3.53084738611371e-300 | -1.93311380213739         |          |       | 0.213 | 0.511  |
| 6.29514780470213e-296 | 3 LTB                     | Memory 3 |       |       |        |
| 3.19543255361979e-262 | -1.05679839194767         |          |       | 0.429 | 0.699  |
| 5.69713669984872e-258 | 3 HLA-DMA                 | Memory 3 |       |       |        |
| 8.07688701071621e-247 | 0.567437867211527         |          |       | 0.931 | 0.679  |
| 1.44002818514059e-242 | 3 EMP3                    | Memory 3 |       |       |        |
| 1.81648450049589e-239 | 0.340367564139393         |          |       | 1     | 0.996  |
| 3.23861021593412e-235 | 3 RPS12                   | Memory 3 |       |       |        |
| 1.99310385481476e-223 | 0.802270818079906         |          |       | 0.709 | 0.443  |
| 3.55350486274923e-219 | 3 CD63                    | Memory 3 |       |       |        |
| 1.54145120813904e-221 | 0.630099588315721         |          |       | 0.897 | 0.701  |
| 2.7482533589911e-217  | 3 ENO1                    | Memory 3 |       |       |        |
| 7.12920445840673e-217 | -0.797483077971027        |          |       | 0.395 | 0.513  |
| 1.27106586288934e-212 | 3 HLA-DRB5                | Memory 3 |       |       |        |
| 1.53750714703782e-211 | 0.333089647022187         |          |       | 0.999 | 0.987  |
| 2.74122149245373e-207 | 3 RPLP0                   | Memory 3 |       |       |        |
| 1.86920791139769e-207 | 0.680257383280585         |          |       | 0.796 | 0.523  |
| 3.33261078523094e-203 | 3 CCR7                    | Memory 3 |       |       |        |
| 1.50989463782102e-204 | -0.987538461512705        |          |       | 0.626 | 0.787  |
| 2.6919911497711e-200  | 3 HLA-DPB1                | Memory 3 |       |       |        |
| 6.81893118057244e-200 | 0.750589207951138         |          |       | 0.573 | 0.264  |
| 1.21574724018426e-195 | 3 MIR155HG                | Memory 3 |       |       |        |

|                       |                    |           |          |
|-----------------------|--------------------|-----------|----------|
| 1.02821356534029e-195 | 0.67574031305919   | 0.294     | 0.103    |
| 1.8332019656452e-191  | 3                  | VRK2      | Memory 3 |
| 4.81500717715173e-193 | -1.25421704186932  | 0.565     | 0.768    |
| 8.58467629614383e-189 | 3                  | HLA-DRB1  | Memory 3 |
| 2.4775290676853e-192  | 0.344894097224215  | 0.997     | 0.979    |
| 4.41718657477612e-188 | 3                  | RPL5      | Memory 3 |
| 1.01343584592688e-185 | 0.316624250048718  | 0.999     | 0.991    |
| 1.80685476970303e-181 | 3                  | RPL9      | Memory 3 |
| 1.40357986147939e-180 | 0.548072779008598  | 0.821     | 0.617    |
| 2.50244253503161e-176 | 3                  | GSTP1     | Memory 3 |
| 8.22845796671843e-180 | -1.3881375174078   | 0.032     | 0.22     |
| 1.46705177088623e-175 | 3                  | RGS13     | Memory 3 |
| 2.24407702938289e-177 | 0.653578836144039  | 0.306     | 0.108    |
| 4.00096493568676e-173 | 3                  | RAB13     | Memory 3 |
| 2.42916954774031e-177 | -0.808881821516201 | 0.721     | 0.822    |
| 4.33096638666619e-173 | 3                  | HLA-DPA1  | Memory 3 |
| 6.61446884016196e-177 | 0.310524907389575  | 0.995     | 0.975    |
| 1.17929364951248e-172 | 3                  | RPS24     | Memory 3 |
| 5.12238068461464e-173 | 0.765094836639347  | 0.288     | 0.12     |
| 9.13269252259944e-169 | 3                  | CYTOR     | Memory 3 |
| 2.4485829268864e-169  | 0.684300249798119  | 0.379     | 0.174    |
| 4.36557850034577e-165 | 3                  | IFNGR1    | Memory 3 |
| 1.14474101976702e-164 | 0.716578611308181  | 0.543     | 0.337    |
| 2.04095876414263e-160 | 3                  | ANXA5     | Memory 3 |
| 1.26167289483098e-163 | 0.48759125348899   | 0.94      | 0.848    |
| 2.24943660419415e-159 | 3                  | SH3BGL3   | Memory 3 |
| 3.49973932828947e-159 | -0.821525996557097 | 0.559     | 0.708    |
| 6.2396852484073e-155  | 3                  | HLA-DQB1  | Memory 3 |
| 1.54820928822403e-157 | 0.678927951292775  | 0.428     | 0.193    |
| 2.76030233997463e-153 | 3                  | MGST3     | Memory 3 |
| 4.39777289802469e-155 | 0.631058808001267  | 0.525     | 0.304    |
| 7.84078929988823e-151 | 3                  | TUBA1A    | Memory 3 |
| 1.98645852943349e-153 | 0.51634085667428   | 0.856     | 0.702    |
| 3.54165691212697e-149 | 3                  | CLIC1     | Memory 3 |
| 2.41230738530276e-153 | -0.803770793855444 | 0.706     | 0.808    |
| 4.3009028372563e-149  | 3                  | LAPTM5    | Memory 3 |
| 3.38157771589959e-148 | 0.657047128068333  | 0.628     | 0.391    |
| 6.02901490967739e-144 | 3                  | TXN       | Memory 3 |
| 1.64377331619374e-138 | 0.366649691763183  | 0.959     | 0.839    |
| 2.93068344544182e-134 | 3                  | HSP90AB1  | Memory 3 |
| 5.20255292443447e-137 | 0.52597609433995   | 0.78      | 0.582    |
| 9.27563160897422e-133 | 3                  | LDHA      | Memory 3 |
| 1.56751662832789e-136 | 0.600363602484293  | 0.453     | 0.232    |
| 2.79472539664579e-132 | 3                  | TNFRSF13B | Memory 3 |
| 1.70531339450122e-134 | -2.05616345622137  | 0.24      | 0.416    |
| 3.04040325105622e-130 | 3                  | JCHAIN    | Memory 3 |
| 1.72094356699063e-132 | 0.625521665384375  | 0.323     | 0.15     |
| 3.0682702855876e-128  | 3                  | CD58      | Memory 3 |
| 2.11106569304041e-132 | 0.3722705367834    | 0.988     | 0.959    |
| 3.76381902412174e-128 | 3                  | MT-ND2    | Memory 3 |

|                       |                     |       |       |
|-----------------------|---------------------|-------|-------|
| 4.60737533731745e-132 | -0.395070849288585  | 0.999 | 0.999 |
| 8.21448948890328e-128 | 3 PTMA Memory 3     |       |       |
| 9.70453195522449e-131 | -0.630428889632448  | 0.023 | 0.172 |
| 1.73022100229697e-126 | 3 SUSD3 Memory 3    |       |       |
| 7.33384812621492e-130 | 0.572123131194066   | 0.184 | 0.055 |
| 1.30755178242286e-125 | 3 MACROD2 Memory 3  |       |       |
| 2.07846833887132e-127 | 0.445014455264614   | 0.824 | 0.665 |
| 3.70570120137368e-123 | 3 TAGLN2 Memory 3   |       |       |
| 3.18786780195774e-122 | 0.543242924753175   | 0.477 | 0.3   |
| 5.68364950411045e-118 | 3 LPXN Memory 3     |       |       |
| 1.29764139133488e-121 | 0.347396752276707   | 0.776 | 0.561 |
| 2.31356483661095e-117 | 3 TUBB Memory 3     |       |       |
| 6.14109876209548e-120 | 0.506123721808393   | 0.606 | 0.414 |
| 1.094896498294e-115   | 3 PPP1R15A Memory 3 |       |       |
| 1.2695756510479e-115  | 0.412309870151048   | 0.814 | 0.635 |
| 2.2635264282533e-111  | 3 ZFP36L1 Memory 3  |       |       |
| 3.13602734058596e-115 | -0.615565013412569  | 0.016 | 0.144 |
| 5.59122314553071e-111 | 3 NEIL1 Memory 3    |       |       |
| 6.59252887130017e-115 | 0.510824290142604   | 0.591 | 0.366 |
| 1.17538197246411e-110 | 3 CD44 Memory 3     |       |       |
| 2.48006026985844e-114 | 0.692594475433683   | 0.317 | 0.148 |
| 4.42169945513061e-110 | 3 DDIT4 Memory 3    |       |       |
| 6.75563454111671e-113 | -0.706946376881553  | 0.021 | 0.159 |
| 1.2044620823357e-108  | 3 BIK Memory 3      |       |       |
| 3.79670498069013e-110 | -0.721975883684748  | 0.665 | 0.77  |
| 6.76914531007244e-106 | 3 CYBA Memory 3     |       |       |
| 4.28756246283646e-110 | 0.568566883577167   | 0.411 | 0.205 |
| 7.64429511499113e-106 | 3 GBP2 Memory 3     |       |       |
| 1.15367473876853e-109 | 0.496806873813087   | 0.513 | 0.338 |
| 2.05688669175042e-105 | 3 APOBEC3G Memory 3 |       |       |
| 8.15220142068958e-108 | -0.509544271352419  | 0.012 | 0.127 |
| 1.45345599129475e-103 | 3 CD38 Memory 3     |       |       |
| 1.58044004432214e-106 | 0.342016053455722   | 0.974 | 0.912 |
| 2.81776655502194e-102 | 3 EEF1B2 Memory 3   |       |       |
| 3.60984945781606e-106 | 0.513309519752913   | 0.492 | 0.324 |
| 6.43600059834025e-102 | 3 S100A11 Memory 3  |       |       |
| 8.65941131543296e-99  | -0.744066496738257  | 0.096 | 0.246 |
| 1.54388644342854e-94  | 3 UBE2J1 Memory 3   |       |       |
| 1.02147784106375e-98  | -0.359569757460797  | 0.007 | 0.11  |
| 1.82119284283256e-94  | 3 SEMA4A Memory 3   |       |       |
| 4.34354501562743e-98  | -0.400707934181601  | 0.007 | 0.109 |
| 7.74410640836215e-94  | 3 MYBL2 Memory 3    |       |       |
| 2.72257469212503e-96  | -0.665032407463223  | 0.462 | 0.639 |
| 4.85407841858971e-92  | 3 HLA-DMB Memory 3  |       |       |
| 5.65918593836394e-96  | 0.442519156225897   | 0.615 | 0.432 |
| 1.00897626095091e-91  | 3 KLF6 Memory 3     |       |       |
| 1.80271093518056e-94  | 0.4588003178874     | 0.199 | 0.066 |
| 3.21405332633342e-90  | 3 CAPN2 Memory 3    |       |       |
| 2.06794710447654e-92  | 0.535018777725629   | 0.458 | 0.253 |
| 3.68694289257122e-88  | 3 GPR183 Memory 3   |       |       |

|                      |                        |       |       |
|----------------------|------------------------|-------|-------|
| 5.83763268671199e-92 | -0.690377126778649     | 0.057 | 0.196 |
| 1.04079153171388e-87 | 3 RGS2 Memory 3        |       |       |
| 7.79841849255034e-92 | 0.551555381727091      | 0.315 | 0.154 |
| 1.3903800330368e-87  | 3 CBX6 Memory 3        |       |       |
| 9.49265484591823e-92 | -0.428462107492903     | 0.01  | 0.114 |
| 1.69244543247876e-87 | 3 HRK Memory 3         |       |       |
| 9.53599574213707e-91 | 0.400064535472592      | 0.995 | 0.974 |
| 1.70017268086562e-86 | 3 FTH1 Memory 3        |       |       |
| 4.02517421092665e-88 | -0.933977095462572     | 0.557 | 0.663 |
| 7.17648310066112e-84 | 3 TCL1A Memory 3       |       |       |
| 7.26376474633068e-88 | -0.413134290923454     | 0.008 | 0.102 |
| 1.2950566166233e-83  | 3 WDR66 Memory 3       |       |       |
| 3.72051274436879e-87 | -0.670757839549468     | 0.784 | 0.862 |
| 6.63330217193511e-83 | 3 CD79B Memory 3       |       |       |
| 1.1275970022453e-85  | 0.455349213624032      | 0.571 | 0.391 |
| 2.01039269530314e-81 | 3 FABP5 Memory 3       |       |       |
| 4.20921029126281e-85 | 0.453382972897871      | 0.611 | 0.412 |
| 7.50460102829246e-81 | 3 PLP2 Memory 3        |       |       |
| 4.89387680275141e-85 | -0.503891475561849     | 0.049 | 0.178 |
| 8.72529295162548e-81 | 3 SEL1L3 Memory 3      |       |       |
| 6.71976069581964e-85 | -0.62043056761657      | 0.134 | 0.274 |
| 1.19806613445768e-80 | 3 CD22 Memory 3        |       |       |
| 8.60496114010295e-85 | -0.406871174713346     | 0.017 | 0.119 |
| 1.53417852166895e-80 | 3 AC023590.1 Memory 3  |       |       |
| 5.48249830571138e-84 | -0.552800558898903     | 0.016 | 0.117 |
| 9.77474622925281e-80 | 3 VPRESB3 Memory 3     |       |       |
| 1.63673918988176e-83 | -0.583444709544194     | 0.075 | 0.217 |
| 2.91814230164019e-79 | 3 EAF2 Memory 3        |       |       |
| 2.87698266917947e-83 | 0.355768279565572      | 0.934 | 0.86  |
| 5.12937240088007e-79 | 3 UBC Memory 3         |       |       |
| 3.50309459344361e-83 | -0.616437343090692     | 0.362 | 0.527 |
| 6.2456673506506e-79  | 3 LSP1 Memory 3        |       |       |
| 3.85697577470868e-83 | -0.722267525180112     | 0.204 | 0.351 |
| 6.87660210872811e-79 | 3 LRMP Memory 3        |       |       |
| 2.11110007728827e-82 | 0.452722857881259      | 0.518 | 0.331 |
| 3.76388032779726e-78 | 3 CAST Memory 3        |       |       |
| 6.65458907461659e-82 | -0.648854706167169     | 0.213 | 0.348 |
| 1.18644668611339e-77 | 3 HVCN1 Memory 3       |       |       |
| 8.24522214388174e-82 | -0.635763250824788     | 0.076 | 0.212 |
| 1.47004065603268e-77 | 3 HMCES Memory 3       |       |       |
| 8.69640776043827e-82 | -1.4102138692694 0.06  | 0.185 |       |
| 1.55048253960854e-77 | 3 MZB1 Memory 3        |       |       |
| 9.4495532539881e-80  | 0.483217985884463      | 0.629 | 0.466 |
| 1.68476084965354e-75 | 3 SQSTM1 Memory 3      |       |       |
| 1.45715270162887e-79 | -0.602507063566949     | 0.013 | 0.101 |
| 2.59795755173412e-75 | 3 PCLAF Memory 3       |       |       |
| 2.37133005329298e-79 | 0.44571288824255 0.489 | 0.324 |       |
| 4.22784435201606e-75 | 3 APOBEC3C Memory 3    |       |       |
| 3.39478586551894e-79 | -0.646501905192284     | 0.305 | 0.439 |
| 6.05256371963371e-75 | 3 IRF8 Memory 3        |       |       |

|                      |                     |       |       |
|----------------------|---------------------|-------|-------|
| 1.7418608554208e-78  | -0.537324734014957  | 0.829 | 0.886 |
| 3.10556371912974e-74 | 3 MS4A1 Memory 3    |       |       |
| 2.89385386995272e-78 | 0.361104800904016   | 0.613 | 0.468 |
| 5.15945206473871e-74 | 3 CD47 Memory 3     |       |       |
| 1.23626785397636e-77 | -0.806854047609177  | 0.076 | 0.199 |
| 2.20414195685444e-73 | 3 PTTG1 Memory 3    |       |       |
| 3.53140386436153e-77 | -0.543630537906975  | 0.486 | 0.629 |
| 6.29613994977018e-73 | 3 CLEC2D Memory 3   |       |       |
| 3.28473594931096e-76 | -0.679898453692851  | 0.157 | 0.315 |
| 5.85635572402651e-72 | 3 BCL7A Memory 3    |       |       |
| 4.95145770144539e-75 | -0.379272874177777  | 0.018 | 0.119 |
| 8.82795393590699e-71 | 3 CPNE5 Memory 3    |       |       |
| 2.82742142566148e-74 | -0.386684886878552  | 0.024 | 0.111 |
| 5.04100965981186e-70 | 3 SCIMP Memory 3    |       |       |
| 1.1087166472024e-72  | -0.791191838143878  | 0.414 | 0.543 |
| 1.97673091029716e-68 | 3 ISG20 Memory 3    |       |       |
| 5.96185870675846e-72 | -0.401004072960997  | 0.021 | 0.11  |
| 1.06293978882797e-67 | 3 RMI2 Memory 3     |       |       |
| 9.0740922512045e-72  | -0.381376850994156  | 0.018 | 0.107 |
| 1.61781990746725e-67 | 3 CENPM Memory 3    |       |       |
| 9.82344997788716e-72 | -0.593900857315565  | 0.165 | 0.299 |
| 1.7514228965575e-67  | 3 BCAS4 Memory 3    |       |       |
| 3.15686658307945e-71 | 0.397936319879627   | 0.521 | 0.382 |
| 5.62837743097234e-67 | 3 FNBP1 Memory 3    |       |       |
| 5.34532676059071e-71 | -0.482577002340272  | 0.042 | 0.162 |
| 9.53018308145717e-67 | 3 CD81 Memory 3     |       |       |
| 3.11288486615509e-70 | -0.492558955018856  | 0.068 | 0.197 |
| 5.54996242786791e-66 | 3 HLA-D0B Memory 3  |       |       |
| 5.65372531900061e-70 | 0.383545743940093   | 0.679 | 0.521 |
| 1.00800268712462e-65 | 3 IMPDH2 Memory 3   |       |       |
| 5.99635966215839e-70 | -0.418838788721977  | 0.04  | 0.148 |
| 1.06909096416622e-65 | 3 SOCS1 Memory 3    |       |       |
| 3.46907527815905e-69 | 0.317684793162623   | 0.79  | 0.669 |
| 6.18501431342978e-65 | 3 MORF4L1 Memory 3  |       |       |
| 5.19817336873524e-69 | 0.44530160588362    | 0.309 | 0.181 |
| 9.26782329911805e-65 | 3 RNF145 Memory 3   |       |       |
| 1.37401313495616e-68 | -0.501070308337818  | 0.105 | 0.228 |
| 2.44972801831334e-64 | 3 LY86 Memory 3     |       |       |
| 7.8982989685697e-68  | -0.637194586701732  | 0.557 | 0.66  |
| 1.40818772310629e-63 | 3 HLA-DQA1 Memory 3 |       |       |
| 4.29167826632735e-67 | 0.323008316466395   | 0.508 | 0.341 |
| 7.65163318103504e-63 | 3 TUBB4B Memory 3   |       |       |
| 6.52747570892379e-67 | 0.35834027397587    | 0.203 | 0.101 |
| 1.16378364414402e-62 | 3 GALNT2 Memory 3   |       |       |
| 7.80246973581649e-67 | 0.312583151205814   | 0.813 | 0.687 |
| 1.39110232919872e-62 | 3 HNRNPDL Memory 3  |       |       |
| 8.04359698897661e-67 | 0.406797611054522   | 0.296 | 0.174 |
| 1.43409290716464e-62 | 3 TUBA1C Memory 3   |       |       |
| 1.18606800557712e-66 | -0.445107829047783  | 0.069 | 0.189 |
| 2.11464064714345e-62 | 3 LCK Memory 3      |       |       |

|                      |                    |        |       |
|----------------------|--------------------|--------|-------|
| 3.06305731174773e-66 | -0.561052319911687 | 0.189  | 0.332 |
| 5.46112488111502e-62 | 3 TNFRSF13C        | Memory | 3     |
| 3.75383422113864e-66 | -0.578106362282837 | 0.813  | 0.873 |
| 6.69271103286809e-62 | 3 CD52             | Memory | 3     |
| 1.12729692544712e-64 | -0.470587272885798 | 0.933  | 0.94  |
| 2.00985768837966e-60 | 3 H3F3A            | Memory | 3     |
| 1.25841059831974e-63 | -0.612769896862557 | 0.185  | 0.313 |
| 2.24362025574426e-59 | 3 CD27             | Memory | 3     |
| 1.62041316091436e-63 | -3.21269913535666  | 0.351  | 0.458 |
| 2.8890346245942e-59  | 3 IGHG3            | Memory | 3     |
| 1.00390309795208e-62 | -0.596495369504915 | 0.558  | 0.641 |
| 1.78985883333876e-58 | 3 HERPUD1          | Memory | 3     |
| 1.20054368817282e-62 | -1.57174163574835  | 0.212  | 0.31  |
| 2.14044934164332e-58 | 3 HMGB2            | Memory | 3     |
| 1.53705686810998e-61 | -0.55878707803964  | 0.122  | 0.242 |
| 2.74041869015328e-57 | 3 IL4R             | Memory | 3     |
| 1.74432585599794e-61 | 0.346033102365794  | 0.16   | 0.079 |
| 3.10995856865872e-57 | 3 LRRFIP2          | Memory | 3     |
| 2.67586070094998e-61 | 0.410582768804274  | 0.469  | 0.343 |
| 4.77079204372372e-57 | 3 CHMP4B           | Memory | 3     |
| 9.60628674064796e-61 | 0.404800107018094  | 0.39   | 0.225 |
| 1.71270486299012e-56 | 3 CAPG             | Memory | 3     |
| 1.23719604796169e-60 | -0.378240312464084 | 0.029  | 0.12  |
| 2.20579683391089e-56 | 3 TNFRSF17         | Memory | 3     |
| 1.45457961719097e-60 | 0.359692809657893  | 0.453  | 0.326 |
| 2.59336999948979e-56 | 3 VOPP1            | Memory | 3     |
| 7.53025377017219e-60 | -0.523234519763658 | 0.395  | 0.512 |
| 1.342568944684e-55   | 3 TSC22D3          | Memory | 3     |
| 8.2982456447854e-60  | 0.378599440463978  | 0.622  | 0.5   |
| 1.47949421600879e-55 | 3 TALD01           | Memory | 3     |
| 1.28183387054908e-57 | 0.348090436505315  | 0.256  | 0.148 |
| 2.28538160780196e-53 | 3 DDB2             | Memory | 3     |
| 4.11159896772726e-56 | -0.445538636504064 | 0.145  | 0.27  |
| 7.33056979956094e-52 | 3 CCDC69           | Memory | 3     |
| 6.34053955049693e-56 | -0.39809276534189  | 0.07   | 0.173 |
| 1.1304547964581e-51  | 3 DEF8             | Memory | 3     |
| 6.58304294582514e-56 | -0.357664678783529 | 0.034  | 0.127 |
| 1.17369072681116e-51 | 3 VNN2             | Memory | 3     |
| 1.90694445526252e-54 | -0.54060138796314  | 0.24   | 0.373 |
| 3.39989126928755e-50 | 3 RCSD1            | Memory | 3     |
| 3.52777856331438e-54 | 0.32772427337345   | 0.161  | 0.067 |
| 6.28967640053322e-50 | 3 TRAF1            | Memory | 3     |
| 3.64021249648834e-54 | 0.356538661524389  | 0.496  | 0.371 |
| 6.49013485998906e-50 | 3 ANXA7            | Memory | 3     |
| 4.10491312222021e-54 | -0.381672481048059 | 0.044  | 0.145 |
| 7.31864960560641e-50 | 3 SIT1             | Memory | 3     |
| 4.80631385385876e-54 | -0.478669146291354 | 0.3    | 0.408 |
| 8.56917697004479e-50 | 3 REL              | Memory | 3     |
| 4.80718850239413e-54 | 0.340274614056282  | 0.179  | 0.074 |
| 8.5707363809185e-50  | 3 FGR              | Memory | 3     |

|                      |                    |       |       |
|----------------------|--------------------|-------|-------|
| 3.25204454215872e-53 | 0.310527931096447  | 0.147 | 0.066 |
| 5.79807021421478e-49 | 3 RAB34 Memory 3   |       |       |
| 1.94340634395906e-52 | -0.461245634377946 | 0.058 | 0.177 |
| 3.46489917064461e-48 | 3 CCDC88A Memory 3 |       |       |
| 5.11226682210366e-52 | -0.509671380942242 | 0.231 | 0.347 |
| 9.11466051712861e-48 | 3 STK17A Memory 3  |       |       |
| 4.97598544906385e-51 | 0.397954651726525  | 0.309 | 0.187 |
| 8.87168445713593e-47 | 3 TYMP Memory 3    |       |       |
| 6.34415725415594e-51 | 0.309205801317079  | 0.692 | 0.566 |
| 1.13109979684346e-46 | 3 APRT Memory 3    |       |       |
| 1.30535136920011e-50 | -0.406539807133125 | 0.067 | 0.159 |
| 2.32731095614687e-46 | 3 CD72 Memory 3    |       |       |
| 1.40965446170604e-50 | 0.361094021154081  | 0.182 | 0.093 |
| 2.5132729397757e-46  | 3 SGK1 Memory 3    |       |       |
| 2.42988123442891e-50 | -0.926330223096569 | 0.101 | 0.22  |
| 4.3322352528633e-46  | 3 PLCG2 Memory 3   |       |       |
| 4.49934880620937e-50 | 0.328414672696807  | 0.198 | 0.104 |
| 8.02188898659068e-46 | 3 ZNF267 Memory 3  |       |       |
| 1.7849848084011e-49  | -1.09266055477728  | 0.094 | 0.152 |
| 3.18244941489832e-45 | 3 IGHA1 Memory 3   |       |       |
| 2.13571006353962e-49 | -0.500182839018463 | 0.168 | 0.275 |
| 3.80775747228479e-45 | 3 HHEX Memory 3    |       |       |
| 3.43190009210693e-49 | -0.30980218112013  | 0.028 | 0.102 |
| 6.11873467421745e-45 | 3 STAG3 Memory 3   |       |       |
| 4.22299632764951e-49 | -0.530803666018867 | 0.219 | 0.34  |
| 7.5291801525663e-45  | 3 RIPOR2 Memory 3  |       |       |
| 6.15848238575334e-49 | -0.5469821233103   | 0.154 | 0.248 |
| 1.09799582455596e-44 | 3 RGS1 Memory 3    |       |       |
| 1.57072403781316e-48 | -0.411377135202448 | 0.114 | 0.236 |
| 2.80044388701708e-44 | 3 UBE2G1 Memory 3  |       |       |
| 5.358486297999e-48   | -0.429702230660813 | 0.171 | 0.292 |
| 9.55364522070241e-44 | 3 LAT2 Memory 3    |       |       |
| 3.79327513226762e-47 | -0.656285568947306 | 0.179 | 0.282 |
| 6.76303023331995e-43 | 3 KLF2 Memory 3    |       |       |
| 4.28492667545061e-47 | -0.53912765426598  | 0.267 | 0.384 |
| 7.6395957696609e-43  | 3 ACADM Memory 3   |       |       |
| 5.29527265701098e-47 | -0.511572966479114 | 0.158 | 0.284 |
| 9.44094162018488e-43 | 3 NCF1 Memory 3    |       |       |
| 6.6568200715238e-47  | -0.481622222375326 | 0.142 | 0.252 |
| 1.18684445055198e-42 | 3 RASGRP2 Memory 3 |       |       |
| 9.91069592257261e-47 | -0.438940154660006 | 0.106 | 0.2   |
| 1.76697797603547e-42 | 3 DNMT1 Memory 3   |       |       |
| 1.004260918091e-46   | 0.345081617119895  | 0.269 | 0.16  |
| 1.79049679086444e-42 | 3 TNIP2 Memory 3   |       |       |
| 2.62951884239138e-46 | -0.425364053195052 | 0.084 | 0.194 |
| 4.68816914409959e-42 | 3 P2RX5 Memory 3   |       |       |
| 1.01403111672229e-45 | 0.300111411182849  | 0.152 | 0.07  |
| 1.80791607800417e-41 | 3 RDX Memory 3     |       |       |
| 1.278842448719e-45   | -0.445977992677632 | 0.242 | 0.334 |
| 2.2800482018211e-41  | 3 PTPN6 Memory 3   |       |       |

|                      |                     |       |       |
|----------------------|---------------------|-------|-------|
| 4.13126966203853e-45 | 0.314716627642293   | 0.253 | 0.155 |
| 7.36564068044849e-41 | 3 PPP1R14B Memory 3 |       |       |
| 4.48389045143089e-45 | 0.326798488685428   | 0.52  | 0.369 |
| 7.99432828585614e-41 | 3 PDCD4 Memory 3    |       |       |
| 7.3507278258122e-45  | 0.345377079902318   | 0.278 | 0.181 |
| 1.31056126406406e-40 | 3 YARS Memory 3     |       |       |
| 1.12660311204029e-44 | 0.435789217872431   | 0.356 | 0.248 |
| 2.00862068845663e-40 | 3 SRGN Memory 3     |       |       |
| 1.67570612245423e-44 | -0.531572732962196  | 0.207 | 0.31  |
| 2.98761644572365e-40 | 3 ZFP36L2 Memory 3  |       |       |
| 3.39973319103161e-44 | -0.511634455751322  | 0.216 | 0.332 |
| 6.06138430629025e-40 | 3 AES Memory 3      |       |       |
| 4.19105817437407e-44 | 0.307256493879936   | 0.28  | 0.162 |
| 7.47223761909153e-40 | 3 PARP14 Memory 3   |       |       |
| 5.53586441973724e-44 | 0.455940959024364   | 0.203 | 0.119 |
| 9.86989267394952e-40 | 3 LGALS3 Memory 3   |       |       |
| 6.97144171660609e-44 | -0.424545833413015  | 0.12  | 0.226 |
| 1.2429383436537e-39  | 3 NANS Memory 3     |       |       |
| 4.28940326894297e-43 | -0.328623563224653  | 0.058 | 0.154 |
| 7.64757708819842e-39 | 3 SH2B2 Memory 3    |       |       |
| 6.77532834074052e-43 | -0.415131067543537  | 0.081 | 0.18  |
| 1.20797328987063e-38 | 3 TMEM156 Memory 3  |       |       |
| 6.90114932261055e-42 | -0.532336922298285  | 0.848 | 0.867 |
| 1.23040591272823e-37 | 3 CD79A Memory 3    |       |       |
| 7.05023397933385e-42 | -0.304287318895682  | 0.028 | 0.1   |
| 1.25698621617543e-37 | 3 FCRL5 Memory 3    |       |       |
| 9.39915554018592e-42 | -0.350969637048937  | 0.081 | 0.172 |
| 1.67577544125975e-37 | 3 SCPEP1 Memory 3   |       |       |
| 1.17366009391796e-41 | 0.352149532492582   | 0.336 | 0.223 |
| 2.09251858144633e-37 | 3 TARS Memory 3     |       |       |
| 1.18845416067845e-41 | -0.34379384159211   | 0.079 | 0.147 |
| 2.11889492307361e-37 | 3 LY9 Memory 3      |       |       |
| 8.4450453949954e-41  | -0.413667195886945  | 0.108 | 0.201 |
| 1.50566714347373e-36 | 3 FAM129C Memory 3  |       |       |
| 2.00187261386777e-40 | -0.577247450531345  | 0.125 | 0.215 |
| 3.56913868326484e-36 | 3 FOS Memory 3      |       |       |
| 4.6687854423672e-40  | -0.441118249623867  | 0.149 | 0.243 |
| 8.32397756519648e-36 | 3 CCND3 Memory 3    |       |       |
| 2.36264022298257e-39 | -0.541975658789326  | 0.672 | 0.729 |
| 4.21235125355563e-35 | 3 LIMD2 Memory 3    |       |       |
| 3.33248538601319e-39 | -0.325605433898461  | 0.062 | 0.15  |
| 5.94148819472291e-35 | 3 HSH2D Memory 3    |       |       |
| 3.42878723757758e-39 | -0.382636362853155  | 0.079 | 0.167 |
| 6.11318476587707e-35 | 3 C12orf75 Memory 3 |       |       |
| 9.49914068153626e-39 | -0.447157777509359  | 0.199 | 0.305 |
| 1.6936017921111e-34  | 3 GGA2 Memory 3     |       |       |
| 5.23094090309422e-38 | -0.31972435451195   | 0.057 | 0.133 |
| 9.32624453612669e-34 | 3 CCNG2 Memory 3    |       |       |
| 5.52127823447709e-38 | -1.35834769363035   | 0.152 | 0.221 |
| 9.84388696424921e-34 | 3 IGHG1 Memory 3    |       |       |



|                      |                     |       |       |
|----------------------|---------------------|-------|-------|
| 5.58041562350064e-38 | -0.421155790506895  | 0.217 | 0.337 |
| 9.94932301513929e-34 | 3 GYPC Memory 3     |       |       |
| 6.67365354702239e-38 | 0.353990661028891   | 0.443 | 0.317 |
| 1.18984569089862e-33 | 3 SLC3A2 Memory 3   |       |       |
| 9.19966926534895e-38 | -0.307433035469274  | 0.056 | 0.129 |
| 1.64020903331906e-33 | 3 PLEK Memory 3     |       |       |
| 2.05818083791836e-37 | -0.317181073010933  | 0.093 | 0.189 |
| 3.66953061592465e-33 | 3 RASGRP3 Memory 3  |       |       |
| 2.44876439242169e-37 | 0.395040410965711   | 0.313 | 0.21  |
| 4.36590203524863e-33 | 3 EIF4EBP1 Memory 3 |       |       |
| 3.08879136144486e-37 | -0.414466076008437  | 0.333 | 0.441 |
| 5.50700611832004e-33 | 3 CYB561A3 Memory 3 |       |       |
| 1.17956226519231e-36 | -0.321299990515755  | 0.064 | 0.153 |
| 2.10304156261137e-32 | 3 RBM38 Memory 3    |       |       |
| 2.44238627075625e-35 | -0.361516882408837  | 0.118 | 0.216 |
| 4.35453048213133e-31 | 3 GLRX Memory 3     |       |       |
| 6.49824558634433e-35 | -0.312257922473455  | 0.094 | 0.182 |
| 1.15857220558933e-30 | 3 EHMT1 Memory 3    |       |       |
| 7.08357912547847e-35 | -0.456987567263214  | 0.184 | 0.258 |
| 1.26293132228156e-30 | 3 FCMR Memory 3     |       |       |
| 1.97067815267949e-34 | -0.447627019587184  | 0.13  | 0.212 |
| 3.51352207841226e-30 | 3 PRKCB Memory 3    |       |       |
| 4.03637712972547e-34 | -0.359330218376206  | 0.202 | 0.29  |
| 7.19645678458753e-30 | 3 GNG7 Memory 3     |       |       |
| 1.71570693317851e-33 | -0.359959851468183  | 0.254 | 0.363 |
| 3.05893389116396e-29 | 3 CD19 Memory 3     |       |       |
| 5.04350457875737e-33 | -0.40017782735313   | 0.104 | 0.18  |
| 8.99206431346651e-29 | 3 MARCH1 Memory 3   |       |       |
| 2.79612775993582e-32 | -0.397795946661621  | 0.291 | 0.391 |
| 4.98521618318957e-28 | 3 EVL Memory 3      |       |       |
| 5.51634148022253e-32 | -0.338385055258624  | 0.072 | 0.152 |
| 9.83508522508874e-28 | 3 TAGAP Memory 3    |       |       |
| 6.67179149380201e-32 | -0.352022011451175  | 0.928 | 0.936 |
| 1.18951370542996e-27 | 3 BTG1 Memory 3     |       |       |
| 1.53115669745255e-31 | -0.46595941916881   | 0.084 | 0.157 |
| 2.72989927588815e-27 | 3 DUSP2 Memory 3    |       |       |
| 1.73118388229281e-31 | -0.345743531938629  | 0.062 | 0.125 |
| 3.08652774373985e-27 | 3 LPP Memory 3      |       |       |
| 2.2553522609017e-30  | -0.338232091176996  | 0.15  | 0.246 |
| 4.02106754596163e-26 | 3 NCF4 Memory 3     |       |       |
| 2.55449877326847e-30 | -0.386797656133975  | 0.402 | 0.498 |
| 4.55441586286035e-26 | 3 RAC2 Memory 3     |       |       |
| 2.73650316631584e-30 | -0.344997258630694  | 0.629 | 0.679 |
| 4.87891149522452e-26 | 3 ATP6V1G1 Memory 3 |       |       |
| 4.52931489897756e-30 | -0.37263510939803   | 0.174 | 0.266 |
| 8.07531553338708e-26 | 3 SYNE2 Memory 3    |       |       |
| 5.20215265639145e-30 | -0.887558342423007  | 0.376 | 0.432 |
| 9.27491797108032e-26 | 3 STMN1 Memory 3    |       |       |
| 6.83112347490319e-29 | -0.46344283800573   | 0.415 | 0.495 |
| 1.21792100434049e-24 | 3 UCP2 Memory 3     |       |       |

|                      |                       |       |       |
|----------------------|-----------------------|-------|-------|
| 3.31006753934819e-28 | -0.381302226736902    | 0.107 | 0.181 |
| 5.90151941590389e-24 | 3 PDIA4 Memory 3      |       |       |
| 7.06154120450555e-28 | -0.385004726303908    | 0.213 | 0.295 |
| 1.2590021813513e-23  | 3 DCK Memory 3        |       |       |
| 1.28831097574027e-27 | -0.340083125870152    | 0.183 | 0.271 |
| 2.29692963864732e-23 | 3 RBM6 Memory 3       |       |       |
| 1.43176071099106e-27 | -0.438174697369023    | 0.74  | 0.779 |
| 2.55268617162596e-23 | 3 ARHGDIB Memory 3    |       |       |
| 1.46296674305987e-27 | -0.373333577813087    | 0.187 | 0.281 |
| 2.60832340620144e-23 | 3 ITGAE Memory 3      |       |       |
| 4.43076559597849e-27 | -0.393637553025711    | 0.15  | 0.217 |
| 7.89961198107006e-23 | 3 LBH Memory 3        |       |       |
| 4.46894954395479e-27 | -0.389794473657554    | 0.38  | 0.442 |
| 7.967690141917e-23   | 3 COTL1 Memory 3      |       |       |
| 2.07756343380234e-26 | -0.302442375927562    | 0.159 | 0.239 |
| 3.70408784612619e-22 | 3 ZNF581 Memory 3     |       |       |
| 2.42942069752223e-26 | -0.388527762158729    | 0.355 | 0.446 |
| 4.33141416161239e-22 | 3 RH0H Memory 3       |       |       |
| 4.10550688718892e-26 | -0.367809959347404    | 0.28  | 0.367 |
| 7.31970822916912e-22 | 3 TPD52 Memory 3      |       |       |
| 4.91214477694591e-26 | -0.391765156059637    | 0.253 | 0.345 |
| 8.75786292281687e-22 | 3 SPIB Memory 3       |       |       |
| 1.09285135064856e-25 | -0.338426608113913    | 0.064 | 0.127 |
| 1.94844467307131e-21 | 3 AL139020.1 Memory 3 |       |       |
| 2.36614029920186e-24 | -0.336572831065652    | 0.336 | 0.429 |
| 4.21859153944699e-20 | 3 TMEM123 Memory 3    |       |       |
| 4.29688634920392e-24 | -0.322843525466936    | 0.204 | 0.284 |
| 7.66091867199567e-20 | 3 STK17B Memory 3     |       |       |
| 1.17969792221831e-23 | -0.304058104489411    | 0.231 | 0.318 |
| 2.10328342552303e-19 | 3 IL16 Memory 3       |       |       |
| 4.58227659598603e-23 | -0.622264005284856    | 0.308 | 0.377 |
| 8.16974094298349e-19 | 3 SELL Memory 3       |       |       |
| 8.75636471477906e-23 | -0.310897193206369    | 0.309 | 0.364 |
| 1.56117226499796e-18 | 3 ARID5B Memory 3     |       |       |
| 2.721374447443e-22   | -1.37383241478915     | 0.372 | 0.426 |
| 4.85193850234613e-18 | 3 HIST1H4C Memory 3   |       |       |
| 6.22587601972342e-22 | -0.345086477943977    | 0.322 | 0.404 |
| 1.11001143555649e-17 | 3 ORAI2 Memory 3      |       |       |
| 8.12330310545749e-22 | -0.478265718156086    | 0.158 | 0.215 |
| 1.44830371067202e-17 | 3 PLAC8 Memory 3      |       |       |
| 1.15893157521165e-21 | -0.389802118454189    | 0.366 | 0.421 |
| 2.06625910544485e-17 | 3 METAP2 Memory 3     |       |       |
| 3.47372097153425e-21 | -0.348408018826288    | 0.137 | 0.217 |
| 6.19329712014842e-17 | 3 FAM111B Memory 3    |       |       |
| 3.62660855604974e-21 | -0.30883698081663     | 0.183 | 0.246 |
| 6.46588039458108e-17 | 3 PHACTR1 Memory 3    |       |       |
| 1.38750069121092e-20 | -0.392150337466699    | 0.549 | 0.621 |
| 2.47377498235995e-16 | 3 MEF2C Memory 3      |       |       |
| 4.35594754383751e-20 | -0.301718284328377    | 0.161 | 0.235 |
| 7.76621887590789e-16 | 3 ATM Memory 3        |       |       |

|                      |                      |       |       |
|----------------------|----------------------|-------|-------|
| 1.06971016442492e-19 | -0.311358073743486   | 0.668 | 0.702 |
| 1.9071862521532e-15  | 3 CCNI Memory 3      |       |       |
| 1.36299894212158e-19 | -0.349050351610509   | 0.233 | 0.32  |
| 2.43009081390856e-15 | 3 HMGN3 Memory 3     |       |       |
| 1.66046482273613e-19 | -0.361668268271769   | 0.337 | 0.409 |
| 2.96044273245624e-15 | 3 STX7 Memory 3      |       |       |
| 2.56632762715896e-19 | -0.462192504483066   | 0.868 | 0.85  |
| 4.57550552646171e-15 | 3 ATP5MG Memory 3    |       |       |
| 1.67919796911585e-18 | -0.306209968688175   | 0.211 | 0.295 |
| 2.99384205913665e-14 | 3 TUBA4A Memory 3    |       |       |
| 2.11468459126248e-18 | -2.32819654552424    | 0.056 | 0.131 |
| 3.77027115776188e-14 | 3 IGHG2 Memory 3     |       |       |
| 3.42465818720687e-18 | -0.426402975872694   | 0.742 | 0.751 |
| 6.10582308197112e-14 | 3 CXCR4 Memory 3     |       |       |
| 8.8996626814277e-18  | -0.329659147753743   | 0.111 | 0.174 |
| 1.58672085947175e-13 | 3 SMC4 Memory 3      |       |       |
| 1.14478838164093e-17 | -0.309719711333549   | 0.221 | 0.289 |
| 2.04104320562761e-13 | 3 CARHSP1 Memory 3   |       |       |
| 1.94784242019869e-17 | -1.95946049093645    | 0.187 | 0.247 |
| 3.47280825097224e-13 | 3 IGHG4 Memory 3     |       |       |
| 3.60858564989323e-17 | -0.304187633147891   | 0.189 | 0.247 |
| 6.43374735519463e-13 | 3 SLBP Memory 3      |       |       |
| 4.94119788354078e-17 | -0.339622597853625   | 0.182 | 0.234 |
| 8.80966170656486e-13 | 3 CKS2 Memory 3      |       |       |
| 1.28240255927099e-16 | -0.308280475425867   | 0.095 | 0.147 |
| 2.28639552292426e-12 | 3 DUSP1 Memory 3     |       |       |
| 8.34486921087041e-16 | -0.380814651934017   | 0.226 | 0.281 |
| 1.48780673160609e-11 | 3 HSPA5 Memory 3     |       |       |
| 2.80009922910891e-15 | -0.363009327911616   | 0.339 | 0.403 |
| 4.99229691557827e-11 | 3 BASP1 Memory 3     |       |       |
| 2.25482649733181e-14 | -0.311460038485207   | 0.345 | 0.353 |
| 4.02013016209289e-10 | 3 TXNIP Memory 3     |       |       |
| 3.31765744216604e-14 | -0.307125142895323   | 0.502 | 0.532 |
| 5.91505145363783e-10 | 3 SRSF7 Memory 3     |       |       |
| 6.48212979951018e-14 | -0.386680523227064   | 0.83  | 0.813 |
| 1.15569892195467e-09 | 3 COR01A Memory 3    |       |       |
| 8.93101830328661e-14 | -0.406762394780497   | 0.322 | 0.362 |
| 1.59231125329297e-09 | 3 H2AFV Memory 3     |       |       |
| 1.2586059607133e-13  | -0.365741013265315   | 0.7   | 0.693 |
| 2.24396856735574e-09 | 3 EZR Memory 3       |       |       |
| 1.91711440991513e-13 | -0.444351719774823   | 0.955 | 0.931 |
| 3.41802328143769e-09 | 3 SERF2 Memory 3     |       |       |
| 6.38110329778988e-13 | -0.318350432479683   | 0.217 | 0.26  |
| 1.13768690696296e-08 | 3 MDM4 Memory 3      |       |       |
| 1.7163759442208e-12  | -0.300936399788277   | 0.265 | 0.317 |
| 3.06012667095126e-08 | 3 PSIP1 Memory 3     |       |       |
| 4.33884435921773e-11 | -0.327191527218357   | 0.272 | 0.299 |
| 7.73572560804929e-07 | 3 LINC00926 Memory 3 |       |       |
| 1.37331104832082e-10 | -0.446706896918366   | 0.293 | 0.314 |
| 2.4484762680512e-06  | 3 HSP90B1 Memory 3   |       |       |

|                       |                    |       |       |   |             |
|-----------------------|--------------------|-------|-------|---|-------------|
| 2.165344225275e-10    | -0.324236841012226 | 0.525 | 0.542 |   |             |
| 3.86059221924279e-06  | 3 PARP1 Memory 3   |       |       |   |             |
| 3.42338209381611e-10  | -0.705426740053976 | 0.749 | 0.713 |   |             |
| 6.10354793506474e-06  | 3 HMGN2 Memory 3   |       |       |   |             |
| 3.5101717557729e-10   | -0.316408991406751 | 0.663 | 0.657 |   |             |
| 6.2582852233675e-06   | 3 SLC25A5 Memory 3 |       |       |   |             |
| 4.24352330078976e-10  | -0.577485507638184 | 0.208 | 0.206 |   |             |
| 7.56577769297807e-06  | 3 LGALS1 Memory 3  |       |       |   |             |
| 6.4449889926834e-10   | -0.314912756936269 | 0.118 | 0.132 |   |             |
| 1.14907708750552e-05  | 3 MYC Memory 3     |       |       |   |             |
| 9.90726634717619e-10  | -0.315182735206735 | 0.463 | 0.495 |   |             |
| 1.76636651703804e-05  | 3 C4orf3 Memory 3  |       |       |   |             |
| 3.60915400478753e-06  | -1.05253090613305  | 0.919 | 0.927 |   |             |
| 0.0643476067513569    | 3 IGKC Memory 3    |       |       |   |             |
| 4.21659268495993e-06  | -0.320380683625002 | 0.313 | 0.351 |   |             |
| 0.0751776309801506    | 3 S100A10 Memory 3 |       |       |   |             |
| 0.000117171346942177  | -1.01789115492362  | 0.458 | 0.427 | 1 |             |
| 3 IGLC3               | Memory 3           |       |       |   |             |
| 0.000163216780868077  | -1.7384000321183   | 0.562 | 0.651 | 1 | 3           |
| IGLC2                 | Memory 3           |       |       |   |             |
| 0.000787134708372115  | -0.341755019884837 | 0.957 | 0.93  | 1 |             |
| 3 HMGB1               | Memory 3           |       |       |   |             |
| 0.00107677132317933   | -0.372251307962412 | 0.812 | 0.764 | 1 |             |
| 3 HMGN1               | Memory 3           |       |       |   |             |
| 0                     | 1.80671979806381   | 0.66  | 0.377 | 0 | 4 EIF5A B   |
| EIF5A                 |                    |       |       |   |             |
| 0                     | 1.71353810762302   | 0.478 | 0.092 | 0 | 4 C1orf56 B |
| EIF5A                 |                    |       |       |   |             |
| 0                     | 1.43983714033053   | 0.612 | 0.313 | 0 | 4 HNRNPH1 B |
| EIF5A                 |                    |       |       |   |             |
| 0                     | 1.35438140753933   | 0.524 | 0.243 | 0 | 4 MDM4 B    |
| EIF5A                 |                    |       |       |   |             |
| 0                     | 1.24043768347899   | 0.797 | 0.628 | 0 | 4 SET B     |
| EIF5A                 |                    |       |       |   |             |
| 3.50048120186269e-306 | 1.2388644151459    | 0.395 | 0.138 |   |             |
| 6.24100793480099e-302 | 4 CTNNB1 B EIF5A   |       |       |   |             |
| 2.05207041906464e-250 | 1.190523145277     | 0.547 | 0.325 |   |             |
| 3.65863635015034e-246 | 4 APOBEC3C B EIF5A |       |       |   |             |
| 1.10823117834095e-237 | 1.05477695864127   | 0.747 | 0.596 |   |             |
| 1.97586536786407e-233 | 4 CDC42 B EIF5A    |       |       |   |             |
| 1.30803273387281e-231 | 1.00749910836956   | 0.238 | 0.055 |   |             |
| 2.33209156122183e-227 | 4 B4GALT1 B EIF5A  |       |       |   |             |
| 1.56402467596949e-226 | 1.14978553438941   | 0.382 | 0.17  |   |             |
| 2.788499594786e-222   | 4 CDC42SE1 B EIF5A |       |       |   |             |
| 2.9707087034906e-209  | 1.10389994045448   | 0.404 | 0.188 |   |             |
| 5.29647654745339e-205 | 4 PPP3CA B EIF5A   |       |       |   |             |
| 6.30188889724146e-204 | 1.036401553979     | 0.342 | 0.135 |   |             |
| 1.12356377148918e-199 | 4 TSPYL1 B EIF5A   |       |       |   |             |
| 2.41311215126247e-202 | 0.827115977714131  | 0.172 | 0.029 |   |             |
| 4.30233765448587e-198 | 4 PHKG1 B EIF5A    |       |       |   |             |

|                       |                    |         |             |
|-----------------------|--------------------|---------|-------------|
| 5.73107829307632e-163 | 1.01279150007939   | 0.337   | 0.157       |
| 1.02179394887258e-158 | 4 CBX6             | B EIF5A |             |
| 1.62213566648727e-155 | 0.934553590565273  |         | 0.633 0.494 |
| 2.89210567978015e-151 | 4 FOXP1            | B EIF5A |             |
| 3.30771008330858e-130 | 0.877267087831733  |         | 0.245 0.099 |
| 5.89731630753088e-126 | 4 AC058791.1       | B EIF5A |             |
| 6.74540131512141e-130 | 0.936797087718015  |         | 0.411 0.267 |
| 1.202637600473e-125   | 4 TNRC6B           | B EIF5A |             |
| 7.04448736499111e-111 | -1.23518998507384  |         | 0.037 0.215 |
| 1.25596165230426e-106 | 4 RGS13            | B EIF5A |             |
| 2.54202188578618e-110 | 0.602862664702743  |         | 0.128 0.031 |
| 4.53217082016818e-106 | 4 GIGYF1           | B EIF5A |             |
| 5.59038881007158e-102 | -0.788555998239054 |         | 0.098 0.314 |
| 9.96710420947662e-98  | 4 CD27             | B EIF5A |             |
| 3.83713805806636e-91  | 0.497055180356402  |         | 0.106 0.026 |
| 6.84123344372651e-87  | 4 LRRC75A          | B EIF5A |             |
| 1.50481047743989e-85  | 0.596612218430918  |         | 0.119 0.038 |
| 2.68292660022757e-81  | 4 C16orf54         | B EIF5A |             |
| 3.82071856124688e-83  | 0.654975538113456  |         | 0.175 0.074 |
| 6.81195912284705e-79  | 4 FGD2             | B EIF5A |             |
| 4.9526662468978e-81   | 0.725903700202533  |         | 0.296 0.196 |
| 8.83010865159408e-77  | 4 SRSF6            | B EIF5A |             |
| 4.73706703508991e-75  | -1.6980002457049   | 0.222   | 0.413       |
| 8.44571681686181e-71  | 4 JCHAIN           | B EIF5A |             |
| 5.89747126332335e-74  | -0.625498606057505 |         | 0.075 0.243 |
| 1.05146015153792e-69  | 4 UBE2J1           | B EIF5A |             |
| 5.43102404153417e-72  | -0.466535320087055 |         | 0.011 0.124 |
| 9.68297276365127e-68  | 4 CD38             | B EIF5A |             |
| 1.45519323208018e-69  | -0.426456689532047 |         | 0.65 0.823  |
| 2.59446401347575e-65  | 4 COR01A           | B EIF5A |             |
| 1.80891262061477e-68  | 0.498615125164807  |         | 0.112 0.044 |
| 3.22511031129408e-64  | 4 MTA2             | B EIF5A |             |
| 1.10204438660227e-64  | -0.395592445223552 |         | 0.582 0.772 |
| 1.96483493687319e-60  | 4 CYBA             | B EIF5A |             |
| 1.95006289107353e-64  | -0.456794614784704 |         | 0.842 0.938 |
| 3.476767128495e-60    | 4 SERF2            | B EIF5A |             |
| 5.78242260873186e-64  | -0.773865959500774 |         | 0.056 0.197 |
| 1.0309481269108e-59   | 4 PTTG1            | B EIF5A |             |
| 6.60373916582208e-64  | 0.642475729338665  |         | 0.325 0.238 |
| 1.17738065587442e-59  | 4 PPP1CB           | B EIF5A |             |
| 2.10904189826628e-63  | -0.584083297817793 |         | 0.027 0.155 |
| 3.76021080041895e-59  | 4 BIK              | B EIF5A |             |
| 1.99470370138349e-61  | -0.327285107408282 |         | 0.711 0.874 |
| 3.55635722919663e-57  | 4 CD79A            | B EIF5A |             |
| 5.85807475043953e-61  | -0.483016767622031 |         | 0.035 0.168 |
| 1.04443614725586e-56  | 4 SUSD3            | B EIF5A |             |
| 3.5204749572738e-58   | 0.642895519236853  |         | 0.224 0.141 |
| 6.27665480132346e-54  | 4 SERPINB9         | B EIF5A |             |
| 9.29421421591653e-58  | -0.395662146180587 |         | 0.03 0.146  |
| 1.65706545255576e-53  | 4 AIM2             | B EIF5A |             |

|                      |                    |       |       |
|----------------------|--------------------|-------|-------|
| 8.28210471026572e-57 | -0.461384483393377 | 0.421 | 0.614 |
| 1.47661644879328e-52 | 4 DYNLL1 B EIF5A   |       |       |
| 1.01245062411655e-56 | -0.428467536274516 | 0.97  | 0.991 |
| 1.8050982177374e-52  | 4 ACTB B EIF5A     |       |       |
| 1.60113888791475e-56 | 0.523965034402004  | 0.14  | 0.072 |
| 2.8546705232632e-52  | 4 RASSF3 B EIF5A   |       |       |
| 3.08032540031453e-56 | -0.508675599063047 | 0.017 | 0.114 |
| 5.49191215622078e-52 | 4 VPREB3 B EIF5A   |       |       |
| 8.38515291007033e-55 | -0.362474169514934 | 0.306 | 0.526 |
| 1.49498891233644e-50 | 4 LSP1 B EIF5A     |       |       |
| 1.14560438116031e-54 | -0.513271736381142 | 0.064 | 0.209 |
| 2.04249805117071e-50 | 4 HMCES B EIF5A    |       |       |
| 8.99349814098819e-54 | -0.363517161601301 | 0.874 | 0.95  |
| 1.60345078355678e-49 | 4 HLA-DRA B EIF5A  |       |       |
| 1.15219042634097e-53 | -0.535410636234826 | 0.662 | 0.792 |
| 2.05424031112331e-49 | 4 ACTG1 B EIF5A    |       |       |
| 2.42062602639024e-53 | -0.534248587430632 | 0.102 | 0.248 |
| 4.31573414245116e-49 | 4 RGS1 B EIF5A     |       |       |
| 8.32785334604476e-53 | -0.473819307064278 | 0.026 | 0.14  |
| 1.48477297306632e-48 | 4 NEIL1 B EIF5A    |       |       |
| 1.27594549016688e-52 | -0.48772449257456  | 0.178 | 0.357 |
| 2.27488321441854e-48 | 4 S100A10 B EIF5A  |       |       |
| 1.84951089475787e-51 | -0.381003097849162 | 0.113 | 0.282 |
| 3.29749297426381e-47 | 4 POU2AF1 B EIF5A  |       |       |
| 1.13368629755873e-50 | -0.434551641557453 | 0.038 | 0.159 |
| 2.02124929991746e-46 | 4 CD81 B EIF5A     |       |       |
| 1.56452273091613e-50 | -0.493344359112102 | 0.8   | 0.893 |
| 2.78938757695037e-46 | 4 GAPDH B EIF5A    |       |       |
| 7.20730070565768e-49 | -1.22776063955102  | 0.06  | 0.182 |
| 1.28498964281171e-44 | 4 MZB1 B EIF5A     |       |       |
| 7.68240450485972e-49 | -0.409321987134386 | 0.07  | 0.214 |
| 1.36969589917144e-44 | 4 EAF2 B EIF5A     |       |       |
| 8.73496094535714e-49 | -0.3767448431581   | 0.728 | 0.858 |
| 1.55735618694772e-44 | 4 ATP5MG B EIF5A   |       |       |
| 1.50315316889297e-48 | 0.457632605344742  | 0.11  | 0.05  |
| 2.67997178481928e-44 | 4 FAM76A B EIF5A   |       |       |
| 2.25741461326293e-48 | -1.37469231711699  | 0.164 | 0.31  |
| 4.02474451398648e-44 | 4 HMGB2 B EIF5A    |       |       |
| 2.04215901921911e-47 | -0.313162541417346 | 0.015 | 0.106 |
| 3.64096531536574e-43 | 4 MYBL2 B EIF5A    |       |       |
| 2.32428039186335e-47 | -0.433791932632498 | 0.345 | 0.544 |
| 4.14395951065317e-43 | 4 ISG20 B EIF5A    |       |       |
| 2.4771307760376e-47  | -0.309932171193096 | 0.526 | 0.703 |
| 4.41647646059743e-43 | 4 EZR B EIF5A      |       |       |
| 3.19939835424691e-47 | 0.49042825135337   | 0.128 | 0.072 |
| 5.70420732578682e-43 | 4 ADAM17 B EIF5A   |       |       |
| 8.93155365775317e-47 | 0.485669678837905  | 0.143 | 0.086 |
| 1.59240670164081e-42 | 4 CNOT9 B EIF5A    |       |       |
| 1.11691766961676e-46 | 0.49418812434855   | 0.156 | 0.093 |
| 1.99135251315972e-42 | 4 CHP1 B EIF5A     |       |       |

|                      |                      |       |       |
|----------------------|----------------------|-------|-------|
| 3.11097413776558e-45 | -0.33451966982747    | 0.162 | 0.327 |
| 5.54655579022226e-41 | 4 PRDX2 B EIF5A      |       |       |
| 1.30970373286768e-44 | 0.58094229283307     | 0.341 | 0.285 |
| 2.33507078532978e-40 | 4 WTAP B EIF5A       |       |       |
| 6.16500044865121e-44 | -0.347105679368515   | 0.577 | 0.763 |
| 1.09915792999002e-39 | 4 HLA-DRB1 B EIF5A   |       |       |
| 7.8064066888288e-43  | 0.46254166424962     | 0.12  | 0.067 |
| 1.39180424855129e-38 | 4 THAP5 B EIF5A      |       |       |
| 1.62715451266924e-42 | -0.39123041022664    | 0.278 | 0.446 |
| 2.90105378063799e-38 | 4 COTL1 B EIF5A      |       |       |
| 2.77270432531771e-42 | -0.30888351413481    | 0.479 | 0.662 |
| 4.94345454160895e-38 | 4 HLA-DQA1 B EIF5A   |       |       |
| 4.36289880870322e-42 | -0.820200541143887   | 0.1   | 0.212 |
| 7.77861228603697e-38 | 4 LGALS1 B EIF5A     |       |       |
| 5.39568154491881e-42 | -0.333657473549316   | 0.018 | 0.111 |
| 9.61996062643575e-38 | 4 HRK B EIF5A        |       |       |
| 1.79731083917529e-41 | -0.311160407775938   | 0.022 | 0.116 |
| 3.20442549516562e-37 | 4 AC023590.1 B EIF5A |       |       |
| 3.13187985058323e-41 | -0.376882963952558   | 0.141 | 0.297 |
| 5.58382858560485e-37 | 4 BCAS4 B EIF5A      |       |       |
| 4.65604295613105e-41 | -0.396194816872705   | 0.215 | 0.384 |
| 8.30125898648604e-37 | 4 ACADM B EIF5A      |       |       |
| 1.67456661554621e-40 | -0.437575068861273   | 0.07  | 0.197 |
| 2.98558481885734e-36 | 4 DAAM1 B EIF5A      |       |       |
| 1.20693881798394e-39 | 0.440745169627334    | 0.12  | 0.064 |
| 2.15185121858356e-35 | 4 RASGEF1B B EIF5A   |       |       |
| 3.71779524200503e-38 | 0.514841587619366    | 0.494 | 0.454 |
| 6.62845713697077e-34 | 4 CAPZA1 B EIF5A     |       |       |
| 2.76880640127485e-37 | 0.458739257288523    | 0.154 | 0.104 |
| 4.93650493283294e-33 | 4 TP53 B EIF5A       |       |       |
| 2.98092601747828e-37 | -0.339523858956129   | 0.093 | 0.225 |
| 5.31469299656202e-33 | 4 NANS B EIF5A       |       |       |
| 7.45221546015399e-37 | 0.551130050753909    | 0.38  | 0.338 |
| 1.32865549439086e-32 | 4 EIF2S3 B EIF5A     |       |       |
| 1.4971537490353e-36  | -0.401039555940648   | 0.207 | 0.367 |
| 2.66927541915504e-32 | 4 H2AFV B EIF5A      |       |       |
| 3.42019456212921e-36 | -0.306064430241936   | 0.17  | 0.33  |
| 6.09786488482017e-32 | 4 NAA38 B EIF5A      |       |       |
| 3.9135076323261e-36  | -0.313952766016861   | 0.04  | 0.143 |
| 6.97739275767421e-32 | 4 SIT1 B EIF5A       |       |       |
| 5.00628995168167e-36 | -0.725776158731242   | 0.285 | 0.436 |
| 8.92571435485325e-32 | 4 STMN1 B EIF5A      |       |       |
| 5.82901748110457e-36 | -0.302329347657802   | 0.057 | 0.171 |
| 1.03925552670613e-31 | 4 DEF8 B EIF5A       |       |       |
| 9.53474152364978e-36 | -0.428289278008537   | 0.071 | 0.192 |
| 1.69994906625152e-31 | 4 RGS2 B EIF5A       |       |       |
| 2.4232824686047e-35  | 0.404428886586888    | 0.126 | 0.078 |
| 4.32047031327531e-31 | 4 TOR1AIP2 B EIF5A   |       |       |
| 1.05487845313765e-34 | -0.330166110272096   | 0.127 | 0.282 |
| 1.88074279409912e-30 | 4 NCF1 B EIF5A       |       |       |

|                      |                    |         |       |
|----------------------|--------------------|---------|-------|
| 1.20970138081622e-34 | -0.319702830964283 | 0.111   | 0.243 |
| 2.15677659185724e-30 | 4 DSTN B EIF5A     |         |       |
| 6.23051392781068e-34 | 0.504781288221171  | 0.216   | 0.163 |
| 1.11083832818937e-29 | 4 SUMF2 B EIF5A    |         |       |
| 7.54970660023365e-34 | -0.31198979932325  | 0.08    | 0.199 |
| 1.34603718975566e-29 | 4 DNMT1 B EIF5A    |         |       |
| 1.61410302080865e-33 | -0.416387122856765 | 0.153   | 0.283 |
| 2.87778427579975e-29 | 4 HSPA5 B EIF5A    |         |       |
| 2.90049027265815e-33 | -0.312939457050839 | 0.133   | 0.271 |
| 5.17128410712222e-29 | 4 CD22 B EIF5A     |         |       |
| 3.63916085070491e-33 | -0.345260550902871 | 0.056   | 0.174 |
| 6.48825988072179e-29 | 4 CCDC88A B EIF5A  |         |       |
| 4.07390290381614e-33 | -0.303250525357072 | 0.972   | 0.99  |
| 7.2633614872138e-29  | 4 CD74 B EIF5A     |         |       |
| 7.52137971674093e-33 | -0.998285831672415 | 0.067   | 0.152 |
| 1.34098678969774e-28 | 4 IGHA1 B EIF5A    |         |       |
| 1.04180366115979e-32 | -0.666306236038445 | 0.344   | 0.496 |
| 1.85743174748179e-28 | 4 LTB B EIF5A      |         |       |
| 8.18738791078744e-32 | 0.500459534660335  | 0.249   | 0.21  |
| 1.45972939061429e-27 | 4 TRA2A B EIF5A    |         |       |
| 9.01280312966189e-32 | 0.539233000390051  | 0.348   | 0.32  |
| 1.60689266998742e-27 | 4 TNFRSF13C        | B EIF5A |       |
| 1.2105045117992e-31  | 0.487620007653653  | 0.192   | 0.13  |
| 2.1582084940868e-27  | 4 AC016831.5       | B EIF5A |       |
| 2.817783423177e-31   | -1.24287184787796  | 0.121   | 0.221 |
| 5.02382606518228e-27 | 4 IGHG1 B EIF5A    |         |       |
| 4.49363049847458e-31 | -0.316227590546101 | 0.061   | 0.166 |
| 8.01169381573034e-27 | 4 C12orf75 B EIF5A |         |       |
| 4.95133084969263e-31 | -0.347789684739399 | 0.114   | 0.244 |
| 8.82772777191699e-27 | 4 GCHFR B EIF5A    |         |       |
| 9.82278229692625e-31 | 0.441917745177113  | 0.165   | 0.125 |
| 1.75130385571898e-26 | 4 AMFR B EIF5A     |         |       |
| 4.46478392307472e-30 | 0.359177233053429  | 0.115   | 0.071 |
| 7.96026325644992e-26 | 4 C2orf68 B EIF5A  |         |       |
| 7.28045158744293e-30 | -0.322754933364355 | 0.127   | 0.249 |
| 1.2980317135252e-25  | 4 SLBP B EIF5A     |         |       |
| 5.15270976895005e-29 | -1.20614089322251  | 0.276   | 0.43  |
| 9.18676624706104e-25 | 4 HIST1H4C B EIF5A |         |       |
| 8.1950490994921e-29  | -0.406299752137274 | 0.459   | 0.595 |
| 1.46109530394845e-24 | 4 MARCKSL1 B EIF5A |         |       |
| 8.9066257837615e-29  | 0.499070658179602  | 0.332   | 0.291 |
| 1.58796231098684e-24 | 4 BCL11A B EIF5A   |         |       |
| 2.42744013644728e-27 | -0.331806333616892 | 0.651   | 0.774 |
| 4.32788301927185e-23 | 4 HMGN1 B EIF5A    |         |       |
| 2.87418184695893e-27 | -2.79715213045848  | 0.332   | 0.457 |
| 5.12437881494308e-23 | 4 IGHG3 B EIF5A    |         |       |
| 4.27234445892637e-27 | 0.415148735072688  | 0.12    | 0.073 |
| 7.61716293581982e-23 | 4 JARID2 B EIF5A   |         |       |
| 1.26210710005273e-26 | 0.4459131288615    | 0.172   | 0.138 |
| 2.25021074868401e-22 | 4 SEC22B B EIF5A   |         |       |



|                      |                        |       |       |
|----------------------|------------------------|-------|-------|
| 1.66236264207476e-25 | -0.305456764884948     | 0.194 | 0.326 |
| 2.96382635455508e-21 | 4 SEC11C B EIF5A       |       |       |
| 1.65221687888461e-24 | 0.411701624720151      | 0.14  | 0.11  |
| 2.94573747336337e-20 | 4 SETD5 B EIF5A        |       |       |
| 8.56524817972037e-23 | -0.617755247956567     | 0.102 | 0.186 |
| 1.52709809796234e-18 | 4 XBP1 B EIF5A         |       |       |
| 1.11514603919242e-22 | -0.562925482576115     | 0.604 | 0.722 |
| 1.98819387327616e-18 | 4 HMGN2 B EIF5A        |       |       |
| 2.38170965335274e-22 | 0.427233983240834      | 0.207 | 0.174 |
| 4.2463501409626e-18  | 4 C6orf62 B EIF5A      |       |       |
| 2.53661427290056e-22 | 0.36199603454267 0.123 | 0.086 |       |
| 4.52252958715441e-18 | 4 PAN3 B EIF5A         |       |       |
| 2.27133631996754e-21 | 0.38913937178342 0.151 | 0.121 |       |
| 4.04956552487012e-17 | 4 ZC3HAV1 B EIF5A      |       |       |
| 3.17546238270935e-20 | 0.402355915535607      | 0.179 | 0.144 |
| 5.6615318821325e-16  | 4 PAFAH1B2 B EIF5A     |       |       |
| 4.76524525908407e-20 | -0.346469372427227     | 0.583 | 0.702 |
| 8.49595577242099e-16 | 4 H2AFZ B EIF5A        |       |       |
| 7.02124083308083e-20 | -0.709661885778061     | 0.104 | 0.217 |
| 1.25181702812998e-15 | 4 PLCG2 B EIF5A        |       |       |
| 2.00829270734496e-19 | -0.301098949058995     | 0.366 | 0.506 |
| 3.58058506792532e-15 | 4 SSR4 B EIF5A         |       |       |
| 3.03886020978778e-19 | 0.475981197387815      | 0.21  | 0.184 |
| 5.41798386803064e-15 | 4 WDR43 B EIF5A        |       |       |
| 1.00016780952257e-18 | 0.454317738399383      | 0.292 | 0.276 |
| 1.78319918759779e-14 | 4 PIM2 B EIF5A         |       |       |
| 1.26084551886916e-18 | 0.431436555346624      | 0.166 | 0.151 |
| 2.24796147559182e-14 | 4 HNRNPL B EIF5A       |       |       |
| 6.50313710964236e-18 | 0.370039637999997      | 0.168 | 0.141 |
| 1.15944431527814e-13 | 4 TLK1 B EIF5A         |       |       |
| 1.56716219369302e-17 | 0.422794830148011      | 0.261 | 0.241 |
| 2.79409347513528e-13 | 4 CDC42SE2 B EIF5A     |       |       |
| 1.39409155568884e-15 | -1.72591653586744      | 0.159 | 0.247 |
| 2.48552583463763e-11 | 4 IGHG4 B EIF5A        |       |       |
| 1.63099406732984e-15 | 0.386608440137504      | 0.242 | 0.224 |
| 2.90789932264237e-11 | 4 PSMA3-AS1 B EIF5A    |       |       |
| 4.58229272734354e-15 | 0.333721694842354      | 0.117 | 0.1   |
| 8.1697697035808e-11  | 4 SYNC B EIF5A         |       |       |
| 7.46961504925784e-15 | 0.416473023648528      | 0.266 | 0.265 |
| 1.33175766713218e-10 | 4 RBM6 B EIF5A         |       |       |
| 1.31953993161074e-13 | -2.05833474493746      | 0.064 | 0.129 |
| 2.35260774406879e-09 | 4 IGHG2 B EIF5A        |       |       |
| 1.48458492302909e-13 | 0.323467732758637      | 0.4   | 0.397 |
| 2.64686645926856e-09 | 4 NUCKS1 B EIF5A       |       |       |
| 1.77899215477028e-13 | 0.382984141970685      | 0.171 | 0.156 |
| 3.17176511273994e-09 | 4 TMED4 B EIF5A        |       |       |
| 3.48495154194477e-13 | -0.527065112347284     | 0.198 | 0.267 |
| 6.21332010413334e-09 | 4 S100A4 B EIF5A       |       |       |
| 3.98481703040051e-13 | 0.357403187284215      | 0.206 | 0.194 |
| 7.10453028350107e-09 | 4 DDX6 B EIF5A         |       |       |

|                       |                      |       |        |   |
|-----------------------|----------------------|-------|--------|---|
| 4.94653479880072e-13  | 0.329246937035435    | 0.111 | 0.097  |   |
| 8.81917689278181e-09  | 4 CYBB B EIF5A       |       |        |   |
| 7.18858932986979e-13  | 0.308051581817021    | 0.133 | 0.112  |   |
| 1.28165359162248e-08  | 4 PIP4K2A B EIF5A    |       |        |   |
| 1.30534801244289e-12  | 0.365612938428537    | 0.19  | 0.162  |   |
| 2.32730497138443e-08  | 4 MARCKS B EIF5A     |       |        |   |
| 2.01508327755489e-11  | 0.348407944992568    | 0.211 | 0.202  |   |
| 3.59269197555261e-07  | 4 TRIM38 B EIF5A     |       |        |   |
| 3.0906349188411e-10   | -0.360897617314005   | 0.586 | 0.67   |   |
| 5.5102929968018e-06   | 4 TUBA1B B EIF5A     |       |        |   |
| 8.56263452723716e-10  | 0.383393752202145    | 0.322 | 0.285  |   |
| 1.52663210986111e-05  | 4 MIR155HG B EIF5A   |       |        |   |
| 1.59474787613845e-08  | 0.331602324472684    | 0.913 | 0.944  |   |
| 0.000284327598836725  | 4 YBX1 B EIF5A       |       |        |   |
| 2.04474842867913e-07  | 0.321195251846932    | 0.263 | 0.279  |   |
| 0.00364558197349203   | 4 STK17B B EIF5A     |       |        |   |
| 3.43675726941398e-07  | 0.325851722787903    | 0.216 | 0.197  |   |
| 0.00612739453563818   | 4 YBX3 B EIF5A       |       |        |   |
| 1.00251275694197e-06  | 0.33295319414354     | 0.177 | 0.17   |   |
| 0.0178737999435184    | 4 PARP14 B EIF5A     |       |        |   |
| 3.95439748252296e-06  | 0.318656342579901    | 0.189 | 0.171  |   |
| 0.0705029527159018    | 4 TNFRSF18 B EIF5A   |       |        |   |
| 1.16496642984153e-05  | 0.346871401457456    | 0.554 | 0.605  |   |
| 0.207701864776447     | 4 ARF6 B EIF5A       |       |        |   |
| 3.30085964984116e-05  | 0.332489942596813    | 0.362 | 0.405  |   |
| 0.58851026697018      | 4 STX7 B EIF5A       |       |        |   |
| 0.0003533428728211    | -1.60057005385102    | 0.566 | 0.649  | 1 |
| 4 IGLC2               | B EIF5A              |       |        |   |
| 0.000689760508946231  | 0.305717748539551    | 0.199 | 0.212  | 1 |
| 4 GABPB1-AS1          | B EIF5A              |       |        |   |
| 0 2.97295509157723    | 0.98 0.227 0         | 5     | S100A4 |   |
| Memory 2              |                      |       |        |   |
| 0 1.65266038900283    | 0.894 0.443 0        | 5     | S100A6 |   |
| Memory 2              |                      |       |        |   |
| 1.62096631507948e-252 | 0.373204575925755    | 1     | 0.998  |   |
| 2.89002084315521e-248 | 5 B2M Memory 2       |       |        |   |
| 2.5150366829886e-237  | 0.906477731654774    | 0.82  | 0.557  |   |
| 4.48405890210038e-233 | 5 VIM Memory 2       |       |        |   |
| 3.82327805411133e-225 | 0.962785281877715    | 0.538 | 0.233  |   |
| 6.81652244267508e-221 | 5 TNFRSF13B Memory 2 |       |        |   |
| 5.89632500791359e-193 | 0.302052752846715    | 1     | 0.999  |   |
| 1.05125578566091e-188 | 5 RPL34 Memory 2     |       |        |   |
| 6.72203453492864e-193 | 0.31602851788192     | 1     | 0.998  |   |
| 1.19847153723243e-188 | 5 RPS14 Memory 2     |       |        |   |
| 3.54884776920105e-180 | 0.824140821885645    | 0.489 | 0.225  |   |
| 6.32724068770855e-176 | 5 CAPG Memory 2      |       |        |   |
| 9.83727198192241e-171 | 0.530344502489679    | 0.971 | 0.863  |   |
| 1.75388722165695e-166 | 5 CD52 Memory 2      |       |        |   |
| 3.47675349630411e-161 | 0.732976823649837    | 0.656 | 0.415  |   |
| 6.1987038085606e-157  | 5 PLP2 Memory 2      |       |        |   |

|                       |                     |       |       |
|-----------------------|---------------------|-------|-------|
| 3.87317984055094e-142 | -1.30476841956879   | 0.037 | 0.215 |
| 6.90549233771827e-138 | 5 RGS13 Memory 2    |       |       |
| 7.51361270659208e-137 | 0.492800938378158   | 0.893 | 0.688 |
| 1.3396020094583e-132  | 5 EMP3 Memory 2     |       |       |
| 6.21263156650239e-136 | -0.96086143897731   | 0.089 | 0.31  |
| 1.10765008199171e-131 | 5 NME1 Memory 2     |       |       |
| 9.23927534278122e-133 | 0.338834031564248   | 0.996 | 0.98  |
| 1.64727040086446e-128 | 5 MT-C01 Memory 2   |       |       |
| 2.34535273158503e-125 | 0.687439576073771   | 0.639 | 0.434 |
| 4.18152938514296e-121 | 5 ANXA2 Memory 2    |       |       |
| 6.64538173903796e-121 | 0.399410107161745   | 0.962 | 0.902 |
| 1.18480511025308e-116 | 5 HLA-A Memory 2    |       |       |
| 9.53019693935021e-120 | 0.475943907495906   | 0.933 | 0.851 |
| 1.69913881231675e-115 | 5 SH3BGL3 Memory 2  |       |       |
| 5.57948646070887e-107 | 0.760146563716532   | 0.446 | 0.29  |
| 9.94766641079784e-103 | 5 TCF4 Memory 2     |       |       |
| 2.96744166973394e-99  | 0.608171105661231   | 0.253 | 0.093 |
| 5.29065175296864e-95  | 5 RHOC Memory 2     |       |       |
| 7.33089681543031e-95  | 0.337604669730327   | 0.992 | 0.967 |
| 1.30702559322307e-90  | 5 MT-ND3 Memory 2   |       |       |
| 4.8917950487257e-85   | -0.923262961323748  | 0.297 | 0.481 |
| 8.72158139237305e-81  | 5 CD83 Memory 2     |       |       |
| 5.40081992860128e-85  | -0.754828131452953  | 0.312 | 0.494 |
| 9.62912185070323e-81  | 5 RANBP1 Memory 2   |       |       |
| 1.02909364596694e-82  | -0.611876840332953  | 0.15  | 0.338 |
| 1.83477106139445e-78  | 5 RFTN1 Memory 2    |       |       |
| 8.22477916141488e-82  | -0.48805171112987   | 0.013 | 0.124 |
| 1.46639587668866e-77  | 5 CD38 Memory 2     |       |       |
| 4.27823930746193e-80  | -0.717928025773878  | 0.323 | 0.506 |
| 7.62767286127388e-76  | 5 HSPE1 Memory 2    |       |       |
| 4.88592072889865e-80  | -0.85681154130743   | 0.777 | 0.852 |
| 8.7111080675534e-76   | 5 HSP90AB1 Memory 2 |       |       |
| 5.06086956657831e-79  | -0.67302206731617   | 0.355 | 0.538 |
| 9.02302435025247e-75  | 5 PSME2 Memory 2    |       |       |
| 1.32844841917306e-78  | 0.5629467137059     | 0.482 | 0.329 |
| 2.36849068654365e-74  | 5 S100A11 Memory 2  |       |       |
| 1.61694795299189e-78  | 0.519498311517153   | 0.532 | 0.342 |
| 2.88285650538923e-74  | 5 LY6E Memory 2     |       |       |
| 3.02960266375964e-75  | 0.48524150231733    | 0.212 | 0.085 |
| 5.40147858921705e-71  | 5 AHNAK Memory 2    |       |       |
| 4.80803571808464e-74  | -0.706980400121991  | 0.296 | 0.47  |
| 8.57224688177311e-70  | 5 HSPD1 Memory 2    |       |       |
| 1.39646888108026e-71  | -0.670250713809168  | 0.643 | 0.753 |
| 2.489764368078e-67    | 5 HSP90AA1 Memory 2 |       |       |
| 2.97580916762153e-71  | 0.482099182965441   | 0.451 | 0.265 |
| 5.30557016495243e-67  | 5 KLF2 Memory 2     |       |       |
| 3.97042173784027e-71  | -0.416839655879549  | 0.015 | 0.12  |
| 7.07886491639541e-67  | 5 PYCR1 Memory 2    |       |       |
| 5.41566739232613e-70  | -0.559105290141858  | 0.274 | 0.458 |
| 9.65559339377825e-66  | 5 ILF2 Memory 2     |       |       |

|                      |                     |       |       |
|----------------------|---------------------|-------|-------|
| 6.47818074768228e-70 | 0.488563219913201   | 0.547 | 0.374 |
| 1.15499484550427e-65 | 5 CD44 Memory 2     |       |       |
| 1.35644349914537e-68 | -0.589887234860569  | 0.144 | 0.311 |
| 2.41840311462628e-64 | 5 ODC1 Memory 2     |       |       |
| 1.69185114055115e-68 | -0.651791236850622  | 0.099 | 0.241 |
| 3.01640139848865e-64 | 5 UBE2J1 Memory 2   |       |       |
| 8.21782509083255e-68 | -1.01751677200645   | 0.622 | 0.721 |
| 1.46515603544454e-63 | 5 HMG2 Memory 2     |       |       |
| 9.09225326351878e-68 | -0.522801263624347  | 0.03  | 0.14  |
| 1.62105783435276e-63 | 5 NEIL1 Memory 2    |       |       |
| 9.41240503104079e-66 | -0.55400052033059   | 0.227 | 0.402 |
| 1.67813769298426e-61 | 5 YWAE Memory 2     |       |       |
| 1.11072503122493e-65 | -0.791132927370297  | 0.072 | 0.196 |
| 1.98031165817093e-61 | 5 PTTG1 Memory 2    |       |       |
| 1.20692622233693e-65 | -1.12020293466709   | 0.156 | 0.293 |
| 2.1518287618045e-61  | 5 MIR155HG Memory 2 |       |       |
| 3.82927666502837e-64 | -0.589643891830248  | 0.442 | 0.591 |
| 6.82721736607908e-60 | 5 ANP32B Memory 2   |       |       |
| 6.03868425816732e-64 | 0.556359090379622   | 0.345 | 0.189 |
| 1.07663701638865e-59 | 5 ACP5 Memory 2     |       |       |
| 9.12391351054102e-64 | -0.776690797565247  | 0.487 | 0.605 |
| 1.62670253979436e-59 | 5 PRDX1 Memory 2    |       |       |
| 1.74964596624806e-63 | -0.440711950919563  | 0.028 | 0.137 |
| 3.11944379322366e-59 | 5 PHGDH Memory 2    |       |       |
| 2.62532406895377e-63 | -0.706865789737379  | 0.684 | 0.772 |
| 4.68069028253767e-59 | 5 HMG1 Memory 2     |       |       |
| 3.13517933461051e-63 | -0.607755639274274  | 0.324 | 0.482 |
| 5.58971123567707e-59 | 5 SNRPD1 Memory 2   |       |       |
| 3.87790426503718e-63 | 0.446077851863476   | 0.507 | 0.339 |
| 6.91391551413479e-59 | 5 TRAF3IP3 Memory 2 |       |       |
| 1.4365088786241e-62  | -0.594872714351876  | 0.93  | 0.943 |
| 2.56115167969892e-58 | 5 YBX1 Memory 2     |       |       |
| 9.66505531118378e-61 | -0.561623133781156  | 0.563 | 0.686 |
| 1.72318271143096e-56 | 5 SRSF3 Memory 2    |       |       |
| 1.34953968838499e-60 | -0.54765599260791   | 0.5   | 0.663 |
| 2.4060943104216e-56  | 5 TCL1A Memory 2    |       |       |
| 1.97858288118044e-60 | -0.506770396951322  | 0.035 | 0.141 |
| 3.52761541885661e-56 | 5 PSAT1 Memory 2    |       |       |
| 7.71485619204841e-60 | 0.461315147280273   | 0.579 | 0.43  |
| 1.37548171048031e-55 | 5 COTL1 Memory 2    |       |       |
| 3.19030210832828e-59 | -0.667181129676607  | 0.67  | 0.752 |
| 5.6879896289385e-55  | 5 RAN Memory 2      |       |       |
| 4.56567663344887e-59 | 0.411638800747532   | 0.632 | 0.487 |
| 8.140144869776e-55   | 5 FXYS5 Memory 2    |       |       |
| 6.98026240622059e-59 | -0.57512177120858   | 0.101 | 0.237 |
| 1.24451098440507e-54 | 5 CKS2 Memory 2     |       |       |
| 1.96344634703006e-58 | -0.76717758162824   | 0.239 | 0.399 |
| 3.50062849211989e-54 | 5 EIF5A Memory 2    |       |       |
| 2.20473848126521e-58 | -0.582791425684454  | 0.14  | 0.287 |
| 3.93082823824774e-54 | 5 SRM Memory 2      |       |       |

|                      |                        |       |       |
|----------------------|------------------------|-------|-------|
| 4.8281065914724e-58  | -0.514882030684444     | 0.271 | 0.439 |
| 8.60803124193615e-54 | 5 SLIRP Memory 2       |       |       |
| 7.59374878640138e-58 | -0.55680789840121      | 0.232 | 0.393 |
| 1.3538894711275e-53  | 5 NHP2 Memory 2        |       |       |
| 6.87349115302057e-57 | -0.573972276513233     | 0.248 | 0.406 |
| 1.22547473767204e-52 | 5 BASP1 Memory 2       |       |       |
| 1.11661351534581e-56 | -0.313195950654939     | 0.015 | 0.107 |
| 1.99081023651004e-52 | 5 SEMA4A Memory 2      |       |       |
| 1.54484466585674e-56 | -0.369130375986697     | 0.022 | 0.116 |
| 2.75430355475599e-52 | 5 AC023590.1 Memory 2  |       |       |
| 5.64491391175019e-56 | 0.45643894039279 0.336 | 0.204 |       |
| 1.00643170132594e-51 | 5 MGST3 Memory 2       |       |       |
| 1.50060617203814e-55 | -0.556547479231314     | 0.365 | 0.52  |
| 2.67543074412679e-51 | 5 PA2G4 Memory 2       |       |       |
| 3.36627879647185e-54 | -0.891562168969994     | 0.072 | 0.187 |
| 6.00173846622966e-50 | 5 XBP1 Memory 2        |       |       |
| 6.04531666734757e-54 | -0.473083687872081     | 0.554 | 0.684 |
| 1.0778195086214e-49  | 5 HNRNPA3 Memory 2     |       |       |
| 6.75645760046334e-54 | -0.493890611913652     | 0.197 | 0.357 |
| 1.20460882558661e-49 | 5 TIMM13 Memory 2      |       |       |
| 1.0928604413293e-53  | 0.433926153551957      | 0.227 | 0.112 |
| 1.94846088084602e-49 | 5 FCGR2B Memory 2      |       |       |
| 1.5025047628498e-53  | 0.386285350837698      | 0.173 | 0.072 |
| 2.6788157416849e-49  | 5 TIMP1 Memory 2       |       |       |
| 3.36856539011074e-53 | -0.782619484902944     | 0.61  | 0.7   |
| 6.00581523402844e-49 | 5 H2AFZ Memory 2       |       |       |
| 5.88419346070493e-53 | -0.670427109109718     | 0.462 | 0.595 |
| 1.04909285210908e-48 | 5 MARCKSL1 Memory 2    |       |       |
| 6.01185756025928e-53 | -0.515144980348987     | 0.53  | 0.652 |
| 1.07185408441863e-48 | 5 SNRPG Memory 2       |       |       |
| 8.29974393279296e-53 | 0.462436773759392      | 0.404 | 0.261 |
| 1.47976134577766e-48 | 5 GPR183 Memory 2      |       |       |
| 3.45599822792852e-52 | -0.335926152172609     | 0.019 | 0.105 |
| 6.16169924057375e-48 | 5 MYBL2 Memory 2       |       |       |
| 6.12838250960382e-52 | -0.509674874978758     | 0.486 | 0.614 |
| 1.09262931763726e-47 | 5 POMP Memory 2        |       |       |
| 8.65216823413937e-52 | 0.341682796181737      | 0.84  | 0.76  |
| 1.54259507446471e-47 | 5 MYL12A Memory 2      |       |       |
| 8.8453747043463e-52  | 0.350594004138153      | 0.655 | 0.505 |
| 1.5770418560379e-47  | 5 BANK1 Memory 2       |       |       |
| 2.82348269351387e-51 | 0.365089349005034      | 0.779 | 0.672 |
| 5.03398729426588e-47 | 5 TAGLN2 Memory 2      |       |       |
| 3.20121102969273e-51 | -0.652125644890462     | 0.208 | 0.347 |
| 5.70743914483917e-47 | 5 LRMP Memory 2        |       |       |
| 4.2036940090575e-51  | 0.316285518004331      | 0.882 | 0.812 |
| 7.49476604874862e-47 | 5 NOP53 Memory 2       |       |       |
| 5.05111887257489e-51 | -0.478579199568619     | 0.457 | 0.601 |
| 9.00563983791378e-47 | 5 SRSF2 Memory 2       |       |       |
| 7.16527129695366e-51 | -0.466925396742951     | 0.302 | 0.465 |
| 1.27749621953387e-46 | 5 SFPQ Memory 2        |       |       |

|                      |                     |       |       |
|----------------------|---------------------|-------|-------|
| 2.94106540751859e-50 | 0.422006996570006   | 0.255 | 0.142 |
| 5.2436255150649e-46  | 5 ALOX5 Memory 2    |       |       |
| 3.87304884896714e-50 | -0.479219280799502  | 0.107 | 0.24  |
| 6.90525879282352e-46 | 5 MTHFD2 Memory 2   |       |       |
| 7.13474555334101e-50 | -0.481436674843267  | 0.297 | 0.449 |
| 1.27205378470517e-45 | 5 PPA1 Memory 2     |       |       |
| 1.28442901364976e-49 | -0.713058932640955  | 0.647 | 0.719 |
| 2.29000848843617e-45 | 5 ENO1 Memory 2     |       |       |
| 1.44937491498895e-49 | -0.579163043852964  | 0.182 | 0.324 |
| 2.5840905359338e-45  | 5 DDX21 Memory 2    |       |       |
| 2.29026222668764e-49 | -0.457506550119733  | 0.672 | 0.764 |
| 4.08330852396139e-45 | 5 PSMA7 Memory 2    |       |       |
| 2.40587333234216e-49 | -0.455048488202995  | 0.427 | 0.566 |
| 4.28943156423284e-45 | 5 ATP5PF Memory 2   |       |       |
| 5.28481244791272e-49 | -0.447815621816107  | 0.476 | 0.611 |
| 9.42229211338359e-45 | 5 PSMB3 Memory 2    |       |       |
| 1.94093243653142e-48 | -0.489149849624738  | 0.318 | 0.471 |
| 3.46048844109187e-44 | 5 PRMT1 Memory 2    |       |       |
| 3.27256932829531e-48 | -0.462134706842071  | 0.272 | 0.424 |
| 5.8346638554177e-44  | 5 DDX39A Memory 2   |       |       |
| 3.67203323583893e-48 | -0.453328037512418  | 0.206 | 0.353 |
| 6.54686805617723e-44 | 5 H2AFY Memory 2    |       |       |
| 8.60646990516479e-48 | -0.361415103292956  | 0.03  | 0.12  |
| 1.53444751939183e-43 | 5 GMDS Memory 2     |       |       |
| 9.67785539798738e-48 | 0.490478083833513   | 0.43  | 0.297 |
| 1.72546483890717e-43 | 5 CD27 Memory 2     |       |       |
| 1.65995594853937e-47 | -0.418695766092325  | 0.11  | 0.245 |
| 2.95953546065085e-43 | 5 HNRNPAB Memory 2  |       |       |
| 2.78062299289597e-47 | -0.466206736875658  | 0.525 | 0.646 |
| 4.95757273403423e-43 | 5 ERH Memory 2      |       |       |
| 3.68893511870357e-47 | 0.332346222572638   | 0.119 | 0.042 |
| 6.5770024231366e-43  | 5 HCK Memory 2      |       |       |
| 5.3218905985945e-47  | -0.427178141415044  | 0.183 | 0.331 |
| 9.48839874823413e-43 | 5 IMP4 Memory 2     |       |       |
| 1.71895201572352e-46 | 0.410292985811288   | 0.418 | 0.291 |
| 3.06471954883346e-42 | 5 PDLIM1 Memory 2   |       |       |
| 3.16681255264261e-46 | -0.519720007557315  | 0.282 | 0.424 |
| 5.64611010010651e-42 | 5 METAP2 Memory 2   |       |       |
| 5.09299179952259e-46 | -0.338139937693925  | 0.05  | 0.16  |
| 9.08029507936882e-42 | 5 PAICS Memory 2    |       |       |
| 6.20857883285905e-46 | 0.399809890390212   | 0.431 | 0.296 |
| 1.10692752011044e-41 | 5 ZFP36L2 Memory 2  |       |       |
| 9.52440378738377e-46 | -0.488634540858491  | 0.453 | 0.577 |
| 1.69810595125265e-41 | 5 SNRPE Memory 2    |       |       |
| 2.14287770188535e-45 | 0.395604670404785   | 0.142 | 0.054 |
| 3.82053665469139e-41 | 5 PPP1R14A Memory 2 |       |       |
| 2.67490138357139e-45 | -0.510481278096235  | 0.203 | 0.338 |
| 4.76908167676943e-41 | 5 GRHPR Memory 2    |       |       |
| 3.470693771333e-45   | -0.480776910044343  | 0.329 | 0.475 |
| 6.1878999249096e-41  | 5 CYCS Memory 2     |       |       |

|                      |                     |       |       |
|----------------------|---------------------|-------|-------|
| 5.47902519899456e-45 | -0.396904963929332  | 0.086 | 0.204 |
| 9.7685540272874e-41  | 5 EBNA1BP2 Memory 2 |       |       |
| 5.72050412369333e-45 | -0.469950444292587  | 0.236 | 0.382 |
| 1.01990868021328e-40 | 5 LCP1 Memory 2     |       |       |
| 6.47380331143775e-45 | -0.561999159247878  | 0.054 | 0.157 |
| 1.15421439239624e-40 | 5 DUSP2 Memory 2    |       |       |
| 7.25779884416139e-45 | 0.511933175976604   | 0.181 | 0.091 |
| 1.29399295592553e-40 | 5 KLK1 Memory 2     |       |       |
| 1.03650603970317e-44 | 0.396933177532464   | 0.178 | 0.087 |
| 1.84798661818678e-40 | 5 ANXA4 Memory 2    |       |       |
| 1.4299487549978e-44  | -0.430301198706316  | 0.126 | 0.257 |
| 2.54945563528559e-40 | 5 GARS Memory 2     |       |       |
| 1.7640084465629e-44  | -0.398279327919627  | 0.089 | 0.214 |
| 3.14505065937699e-40 | 5 GNL3 Memory 2     |       |       |
| 3.11314015556712e-44 | 0.352305105083049   | 0.828 | 0.748 |
| 5.55041758336061e-40 | 5 HLA-C Memory 2    |       |       |
| 4.07893354071504e-44 | -0.460124215129122  | 0.525 | 0.639 |
| 7.27233060974084e-40 | 5 PSMA4 Memory 2    |       |       |
| 1.23841610165454e-43 | 0.450307746520437   | 0.222 | 0.123 |
| 2.20797206763987e-39 | 5 CD24 Memory 2     |       |       |
| 1.95803319080411e-43 | -0.49742838498497   | 0.266 | 0.408 |
| 3.49097737588464e-39 | 5 RPL22L1 Memory 2  |       |       |
| 4.65021458889836e-43 | -0.418040713480664  | 0.166 | 0.308 |
| 8.29086759054688e-39 | 5 NOP58 Memory 2    |       |       |
| 5.35266866056424e-43 | -0.631561466947114  | 0.163 | 0.283 |
| 9.54327295491998e-39 | 5 HSPA5 Memory 2    |       |       |
| 6.57917327713829e-43 | -0.431951893198667  | 0.447 | 0.573 |
| 1.17300080358099e-38 | 5 UQCRCQ Memory 2   |       |       |
| 9.84645032427836e-43 | -0.350630397889371  | 0.058 | 0.161 |
| 1.75552362831559e-38 | 5 GAR1 Memory 2     |       |       |
| 9.94171647845765e-43 | -0.505630167254177  | 0.057 | 0.153 |
| 1.77250863094421e-38 | 5 BIK Memory 2      |       |       |
| 1.01786629372541e-42 | -0.372898971538535  | 0.101 | 0.224 |
| 1.81475381508303e-38 | 5 MRPL12 Memory 2   |       |       |
| 1.23219512566106e-42 | -1.43884432732575   | 0.218 | 0.307 |
| 2.1968806895411e-38  | 5 HMGB2 Memory 2    |       |       |
| 1.81661363468854e-42 | -0.412485572478995  | 0.544 | 0.662 |
| 3.23884044928619e-38 | 5 PSMB1 Memory 2    |       |       |
| 2.16512961489659e-42 | -0.441667594828576  | 0.293 | 0.435 |
| 3.86020959039913e-38 | 5 CCT2 Memory 2     |       |       |
| 2.24103212879357e-42 | -0.439224992789326  | 0.254 | 0.396 |
| 3.99553618242606e-38 | 5 CCT5 Memory 2     |       |       |
| 4.30195813609403e-42 | -0.494716918490453  | 0.522 | 0.643 |
| 7.66996116084205e-38 | 5 SET Memory 2      |       |       |
| 6.73217073719235e-42 | -0.565768063662162  | 0.447 | 0.565 |
| 1.20027872073402e-37 | 5 NCL Memory 2      |       |       |
| 1.09671516708213e-41 | -0.441874695555317  | 0.309 | 0.452 |
| 1.95533347139074e-37 | 5 C1QBP Memory 2    |       |       |
| 2.30796611664193e-41 | 0.367036606169121   | 0.339 | 0.205 |
| 4.11487278936089e-37 | 5 PLAC8 Memory 2    |       |       |

|                      |                    |       |       |
|----------------------|--------------------|-------|-------|
| 3.21861912811297e-41 | -0.44019788947201  | 0.31  | 0.449 |
| 5.73847604351262e-37 | 5 CCT6A Memory 2   |       |       |
| 3.27773108956913e-41 | -0.410452970966419 | 0.527 | 0.646 |
| 5.84386675959281e-37 | 5 ATP5MF Memory 2  |       |       |
| 3.30428128580483e-41 | -0.410965164594659 | 0.17  | 0.309 |
| 5.89120310446143e-37 | 5 ATP1B3 Memory 2  |       |       |
| 3.83815655414194e-41 | -0.410864040097239 | 0.106 | 0.224 |
| 6.84304932037966e-37 | 5 NANS Memory 2    |       |       |
| 6.50477644726879e-41 | -0.430030760386385 | 0.089 | 0.198 |
| 1.15973659278355e-36 | 5 DNMT1 Memory 2   |       |       |
| 6.65158088386384e-41 | -0.351435979153989 | 0.051 | 0.147 |
| 1.18591035578408e-36 | 5 NOP16 Memory 2   |       |       |
| 1.32737969917317e-40 | -0.396925587506071 | 0.521 | 0.647 |
| 2.36658526565585e-36 | 5 HNRNPM Memory 2  |       |       |
| 1.69494064237403e-40 | -0.41204265661205  | 0.666 | 0.748 |
| 3.02190967128866e-36 | 5 CHCHD2 Memory 2  |       |       |
| 1.90236819646688e-40 | -0.371381283653355 | 0.15  | 0.288 |
| 3.39173225748081e-36 | 5 PSMD14 Memory 2  |       |       |
| 2.90468642768687e-40 | -0.637231798510368 | 0.05  | 0.135 |
| 5.17876543192292e-36 | 5 MYC Memory 2     |       |       |
| 4.96652473468426e-40 | -0.359670087125996 | 0.071 | 0.177 |
| 8.85481694946858e-36 | 5 ASNS Memory 2    |       |       |
| 5.97568079098193e-40 | -0.435258101791882 | 0.212 | 0.353 |
| 1.06540412822417e-35 | 5 ABRACL Memory 2  |       |       |
| 6.64990906494614e-40 | -0.41632284805029  | 0.291 | 0.436 |
| 1.18561228718925e-35 | 5 DNAJA1 Memory 2  |       |       |
| 2.97219370068928e-39 | -0.409761455049344 | 0.157 | 0.285 |
| 5.29912414895891e-35 | 5 WARS Memory 2    |       |       |
| 3.81369185073381e-39 | -0.388373587947895 | 0.439 | 0.577 |
| 6.79943120067331e-35 | 5 RBM8A Memory 2   |       |       |
| 3.98154717897712e-39 | -0.434482435236691 | 0.469 | 0.585 |
| 7.0987004653983e-35  | 5 LDHB Memory 2    |       |       |
| 4.17039875498313e-39 | -0.374912186854773 | 0.085 | 0.193 |
| 7.43540394025942e-35 | 5 GPATCH4 Memory 2 |       |       |
| 5.46175591462336e-39 | 0.338384914615055  | 0.153 | 0.072 |
| 9.737764620182e-35   | 5 CAPN2 Memory 2   |       |       |
| 5.49647719703375e-39 | -0.301707639232146 | 0.035 | 0.12  |
| 9.79966919459148e-35 | 5 LMNB1 Memory 2   |       |       |
| 7.28852698686759e-39 | -0.369860279680842 | 0.138 | 0.271 |
| 1.29947147648862e-34 | 5 SYNCRIP Memory 2 |       |       |
| 1.04878086296175e-38 | -0.367021050453376 | 0.079 | 0.185 |
| 1.86987140057451e-34 | 5 LCK Memory 2     |       |       |
| 2.04099208588167e-38 | -0.360280804503101 | 0.385 | 0.53  |
| 3.63888478991843e-34 | 5 SELENOT Memory 2 |       |       |
| 2.53730902442726e-38 | -0.372939778902147 | 0.119 | 0.242 |
| 4.52376825965136e-34 | 5 NIFK Memory 2    |       |       |
| 3.09435444513647e-38 | -0.383419974320538 | 0.371 | 0.504 |
| 5.51692454023382e-34 | 5 COX5A Memory 2   |       |       |
| 3.53658747298253e-38 | -0.355556167005846 | 0.067 | 0.17  |
| 6.30538180558056e-34 | 5 NFKB1 Memory 2   |       |       |



|                      |                        |       |       |
|----------------------|------------------------|-------|-------|
| 3.87895452207238e-38 | -0.403274751344352     | 0.32  | 0.455 |
| 6.91578801740284e-34 | 5 SEM1 Memory 2        |       |       |
| 4.33712588679409e-38 | -0.435702614462337     | 0.425 | 0.54  |
| 7.73266174356518e-34 | 5 SRSF9 Memory 2       |       |       |
| 1.24116947381666e-37 | 0.374850732412382      | 0.44  | 0.34  |
| 2.21288105486772e-33 | 5 CAST Memory 2        |       |       |
| 1.24539299680943e-37 | -0.372493907471586     | 0.263 | 0.406 |
| 2.22041117401154e-33 | 5 PSMA3 Memory 2       |       |       |
| 1.81269366719981e-37 | 0.341827516976371      | 0.601 | 0.498 |
| 3.23185153925054e-33 | 5 TSC22D3 Memory 2     |       |       |
| 2.15861918532663e-37 | 0.363649576517869      | 0.323 | 0.206 |
| 3.84860214551885e-33 | 5 LBH Memory 2         |       |       |
| 2.25516521743745e-37 | -0.398121249920624     | 0.312 | 0.451 |
| 4.02073406616924e-33 | 5 ATP5MC1 Memory 2     |       |       |
| 2.69702130071822e-37 | -0.370635526451127     | 0.111 | 0.23  |
| 4.80851927705051e-33 | 5 SIAH2 Memory 2       |       |       |
| 2.78319212740098e-37 | -0.444967112355908     | 0.122 | 0.238 |
| 4.9621532439432e-33  | 5 IL4R Memory 2        |       |       |
| 2.83375460199174e-37 | -0.481728150910896     | 0.915 | 0.93  |
| 5.05230107989108e-33 | 5 NPM1 Memory 2        |       |       |
| 3.2522649177636e-37  | -0.457928541689052     | 0.102 | 0.207 |
| 5.79846312188073e-33 | 5 HMCES Memory 2       |       |       |
| 6.89394564693085e-37 | -0.424875646183989     | 0.305 | 0.441 |
| 1.2291215693913e-32  | 5 EIF5B Memory 2       |       |       |
| 7.2246582873585e-37  | -0.347116026086085     | 0.268 | 0.411 |
| 1.28808432605315e-32 | 5 PSMB2 Memory 2       |       |       |
| 1.45996942677609e-36 | 0.365478290589481      | 0.384 | 0.28  |
| 2.60297949099909e-32 | 5 ACAP1 Memory 2       |       |       |
| 1.5477422579555e-36  | -0.3094105111528 0.029 | 0.104 |       |
| 2.75946967170885e-32 | 5 CENPM Memory 2       |       |       |
| 1.58121321743146e-36 | -0.381838511421305     | 0.278 | 0.418 |
| 2.81914504535855e-32 | 5 HNRNPR Memory 2      |       |       |
| 1.95989690322892e-36 | -0.362405652227281     | 0.233 | 0.374 |
| 3.49430018876685e-32 | 5 EWSR1 Memory 2       |       |       |
| 2.0555593415099e-36  | 0.316108433340922      | 0.704 | 0.616 |
| 3.664856749978e-32   | 5 IFI16 Memory 2       |       |       |
| 2.35449046534054e-36 | 0.367821036366821      | 0.414 | 0.3   |
| 4.19782105065565e-32 | 5 ARHGAP24 Memory 2    |       |       |
| 2.54921251405222e-36 | -0.438679860267858     | 0.192 | 0.314 |
| 4.54499099130371e-32 | 5 CALR Memory 2        |       |       |
| 2.79971539623285e-36 | -0.634155449700214     | 0.293 | 0.41  |
| 4.99161257994355e-32 | 5 FABP5 Memory 2       |       |       |
| 2.82842757533892e-36 | -0.386374369316314     | 0.27  | 0.41  |
| 5.04280352407176e-32 | 5 BZW1 Memory 2        |       |       |
| 4.48604441314274e-36 | -0.330783320226497     | 0.069 | 0.168 |
| 7.99816858419219e-32 | 5 MRT04 Memory 2       |       |       |
| 4.63813709999956e-36 | -0.413274069585494     | 0.407 | 0.536 |
| 8.26933463558922e-32 | 5 SRSF7 Memory 2       |       |       |
| 6.44653280493572e-36 | -0.39962535549104      | 0.287 | 0.429 |
| 1.14935233379199e-31 | 5 TMEM123 Memory 2     |       |       |

|                      |                    |       |       |
|----------------------|--------------------|-------|-------|
| 8.60758303018893e-36 | -0.393112311498799 | 0.106 | 0.212 |
| 1.53464597845238e-31 | 5 EAF2 Memory 2    |       |       |
| 1.01993607825686e-35 | 0.363695767385378  | 0.393 | 0.273 |
| 1.81844403392416e-31 | 5 IFITM2 Memory 2  |       |       |
| 1.03732412785422e-35 | -0.499956937465957 | 0.21  | 0.333 |
| 1.84944518755128e-31 | 5 SLC3A2 Memory 2  |       |       |
| 1.04864229387142e-35 | -0.337875168444651 | 0.07  | 0.173 |
| 1.86962434574336e-31 | 5 SEL1L3 Memory 2  |       |       |
| 1.35178290468957e-35 | -0.355299791021591 | 0.406 | 0.538 |
| 2.41009374077104e-31 | 5 GHITM Memory 2   |       |       |
| 1.79446288945777e-35 | -0.406992856298554 | 0.48  | 0.59  |
| 3.19934788561427e-31 | 5 ATP5MC3 Memory 2 |       |       |
| 1.96975270441455e-35 | -0.34100311155069  | 0.072 | 0.17  |
| 3.5118720967007e-31  | 5 DEF8 Memory 2    |       |       |
| 2.09727862555909e-35 | -0.365250560372445 | 0.611 | 0.705 |
| 3.7392380615093e-31  | 5 ELOB Memory 2    |       |       |
| 2.55389296110481e-35 | -0.423694551948124 | 0.035 | 0.113 |
| 4.55333576035377e-31 | 5 VPRESB3 Memory 2 |       |       |
| 2.68012847547204e-35 | -0.344190188378903 | 0.187 | 0.322 |
| 4.7784010589191e-31  | 5 NDUFAF3 Memory 2 |       |       |
| 4.14868076217458e-35 | 0.312203298170533  | 0.592 | 0.487 |
| 7.39668293088105e-31 | 5 ANKRD12 Memory 2 |       |       |
| 4.85269467492404e-35 | 0.335794732468751  | 0.618 | 0.51  |
| 8.65186933592207e-31 | 5 LSP1 Memory 2    |       |       |
| 6.09867111692658e-35 | -0.423675376997977 | 0.451 | 0.559 |
| 1.08733207343684e-30 | 5 SEC61G Memory 2  |       |       |
| 6.10775497623304e-35 | -0.332265156425519 | 0.137 | 0.266 |
| 1.08895163471259e-30 | 5 AK6 Memory 2     |       |       |
| 1.98406446626335e-34 | -0.324846104996389 | 0.063 | 0.156 |
| 3.53738853690093e-30 | 5 PPAN Memory 2    |       |       |
| 2.59212906434792e-34 | -0.350687963836539 | 0.125 | 0.239 |
| 4.6215069088259e-30  | 5 CDK4 Memory 2    |       |       |
| 3.36084631998184e-34 | -0.395272592200216 | 0.396 | 0.52  |
| 5.99205290389562e-30 | 5 SSBP1 Memory 2   |       |       |
| 3.50966085405673e-34 | 0.32849730883336   | 0.16  | 0.087 |
| 6.25737433669774e-30 | 5 ITGB7 Memory 2   |       |       |
| 5.91585713404628e-34 | -0.37354863796519  | 0.461 | 0.579 |
| 1.05473816842911e-29 | 5 PARK7 Memory 2   |       |       |
| 7.63052218552279e-34 | -0.371480520163955 | 0.642 | 0.727 |
| 1.36044580045686e-29 | 5 COX6C Memory 2   |       |       |
| 1.21320026159537e-33 | -0.332453531387402 | 0.122 | 0.241 |
| 2.16301474639839e-29 | 5 BUD23 Memory 2   |       |       |
| 1.40535639108866e-33 | 0.310009570345188  | 0.149 | 0.069 |
| 2.50560990967198e-29 | 5 MYO1F Memory 2   |       |       |
| 1.58282962283102e-33 | -0.517974295638517 | 0.678 | 0.739 |
| 2.82202693454543e-29 | 5 HSPA8 Memory 2   |       |       |
| 1.76307509502762e-33 | -0.496304592987904 | 0.542 | 0.64  |
| 3.14338658692474e-29 | 5 HERPUD1 Memory 2 |       |       |
| 2.96952317815948e-33 | -0.327309280758119 | 0.097 | 0.206 |
| 5.29436287434054e-29 | 5 TOMM40 Memory 2  |       |       |

|                      |                        |       |       |
|----------------------|------------------------|-------|-------|
| 3.01391217737798e-33 | -0.362424807147372     | 0.072 | 0.165 |
| 5.3735040210472e-29  | 5 SUSD3 Memory 2       |       |       |
| 3.26564747396628e-33 | -0.359777698212287     | 0.596 | 0.689 |
| 5.82232288133449e-29 | 5 COX6A1 Memory 2      |       |       |
| 3.46407717706369e-33 | -0.369132502830673     | 0.335 | 0.463 |
| 6.17610319898685e-29 | 5 LSM5 Memory 2        |       |       |
| 4.2931956987642e-33  | -0.385196805175991     | 0.229 | 0.356 |
| 7.65433861132669e-29 | 5 PDIA6 Memory 2       |       |       |
| 5.62680982766581e-33 | -0.329811349955457     | 0.142 | 0.259 |
| 1.00320392417454e-28 | 5 RRP7A Memory 2       |       |       |
| 5.63650428111949e-33 | -0.41748767980137      | 0.154 | 0.269 |
| 1.00493234828079e-28 | 5 CD22 Memory 2        |       |       |
| 5.68491187623401e-33 | -0.382292496234475     | 0.305 | 0.434 |
| 1.01356293841376e-28 | 5 CCT4 Memory 2        |       |       |
| 9.47435658306793e-33 | 0.369168447953051      | 0.407 | 0.314 |
| 1.68918303519518e-28 | 5 FCRLA Memory 2       |       |       |
| 1.46507685443529e-32 | -0.3609365995503 0.263 | 0.397 |       |
| 2.61208552377268e-28 | 5 ARPC5L Memory 2      |       |       |
| 1.8817070741644e-32  | -0.32906296662456      | 0.067 | 0.161 |
| 3.35489554252772e-28 | 5 NOLC1 Memory 2       |       |       |
| 2.5626998539545e-32  | -0.339186034191741     | 0.183 | 0.311 |
| 4.56903756961547e-28 | 5 PSMD11 Memory 2      |       |       |
| 2.81710783888771e-32 | -0.328510831833159     | 0.175 | 0.299 |
| 5.02262156595291e-28 | 5 SSRP1 Memory 2       |       |       |
| 2.94521309878572e-32 | -0.404451499447596     | 0.283 | 0.403 |
| 5.25102043382505e-28 | 5 NUCKS1 Memory 2      |       |       |
| 3.29172916431117e-32 | -0.369790203073025     | 0.148 | 0.271 |
| 5.86882392705038e-28 | 5 FAM3C Memory 2       |       |       |
| 3.63153438750412e-32 | -0.381281338490469     | 0.515 | 0.621 |
| 6.47466265948109e-28 | 5 SERBP1 Memory 2      |       |       |
| 3.9823587645733e-32  | -0.327954036981009     | 0.395 | 0.525 |
| 7.10014744135773e-28 | 5 PSMB6 Memory 2       |       |       |
| 4.07145501980001e-32 | -0.4351813444562 0.139 | 0.248 |       |
| 7.25899715480144e-28 | 5 KPNA2 Memory 2       |       |       |
| 4.08560546608693e-32 | -0.341444563469133     | 0.269 | 0.402 |
| 7.28422598548639e-28 | 5 NDUFAB1 Memory 2     |       |       |
| 4.14404633091845e-32 | 0.331658720370674      | 0.188 | 0.116 |
| 7.3884202033945e-28  | 5 PYCARD Memory 2      |       |       |
| 4.99352370327366e-32 | -0.316886026754314     | 0.069 | 0.167 |
| 8.9029534105666e-28  | 5 LYPLAL1 Memory 2     |       |       |
| 6.96664195012158e-32 | -0.372138122328272     | 0.337 | 0.457 |
| 1.24208259328718e-27 | 5 MRPL51 Memory 2      |       |       |
| 8.56691505237063e-32 | -0.334626806574547     | 0.043 | 0.122 |
| 1.52739528468716e-27 | 5 UBE2S Memory 2       |       |       |
| 1.28179360674869e-31 | -0.344707018084675     | 0.501 | 0.614 |
| 2.28530982147223e-27 | 5 POLR2L Memory 2      |       |       |
| 2.23927181408409e-31 | -0.323881055363584     | 0.157 | 0.281 |
| 3.99239771733052e-27 | 5 NDUFAF8 Memory 2     |       |       |
| 2.95549478724499e-31 | -0.618485074022443     | 0.5   | 0.581 |
| 5.26935165617909e-27 | 5 TUBB Memory 2        |       |       |

|                      |                     |       |       |
|----------------------|---------------------|-------|-------|
| 4.1142800011274e-31  | -0.330691542833799  | 0.087 | 0.187 |
| 7.33534981401004e-27 | 5 CMSS1 Memory 2    |       |       |
| 5.54600145308822e-31 | -0.386374575477947  | 0.244 | 0.368 |
| 9.88796599071099e-27 | 5 HSPA9 Memory 2    |       |       |
| 6.01606188179547e-31 | 0.354331972994023   | 0.295 | 0.201 |
| 1.07260367290532e-26 | 5 PRKCB Memory 2    |       |       |
| 8.28284491706954e-31 | -0.321299872430282  | 0.226 | 0.355 |
| 1.47674842026433e-26 | 5 CYC1 Memory 2     |       |       |
| 9.51983611556419e-31 | 0.337189163543532   | 0.424 | 0.327 |
| 1.69729158104394e-26 | 5 RIPOR2 Memory 2   |       |       |
| 1.0367072842395e-30  | -0.347241344541868  | 0.361 | 0.481 |
| 1.8483454170706e-26  | 5 PRELID1 Memory 2  |       |       |
| 1.95525784531081e-30 | -0.316334647699131  | 0.104 | 0.209 |
| 3.48602921240465e-26 | 5 UBALD2 Memory 2   |       |       |
| 1.99667293100078e-30 | -0.361749515878157  | 0.474 | 0.591 |
| 3.55986816868129e-26 | 5 EIF2S2 Memory 2   |       |       |
| 2.03718060880292e-30 | -0.329084690822622  | 0.37  | 0.496 |
| 3.63208930743473e-26 | 5 CCT8 Memory 2     |       |       |
| 2.58964932357447e-30 | 0.31525692111603    | 0.461 | 0.347 |
| 4.61708577900092e-26 | 5 TXNIP Memory 2    |       |       |
| 3.00242755555831e-30 | -0.4786818722935    | 0.832 | 0.852 |
| 5.35302808880491e-26 | 5 ATP5MG Memory 2   |       |       |
| 4.73056801679557e-30 | -0.459900911781864  | 0.096 | 0.176 |
| 8.43412971714482e-26 | 5 TNFRSF18 Memory 2 |       |       |
| 5.51118416425505e-30 | -0.412583178510387  | 0.515 | 0.615 |
| 9.82589024645032e-26 | 5 SYNGR2 Memory 2   |       |       |
| 6.50974148096931e-30 | 0.340441947157316   | 0.531 | 0.441 |
| 1.16062180864202e-25 | 5 KLF6 Memory 2     |       |       |
| 7.99902607445131e-30 | -0.538700006291698  | 0.311 | 0.414 |
| 1.42614635881392e-25 | 5 TXN Memory 2      |       |       |
| 9.58938437527215e-30 | -0.314966112937147  | 0.265 | 0.394 |
| 1.70969134026727e-25 | 5 NDUFS6 Memory 2   |       |       |
| 9.59989047103818e-30 | 0.343847198270103   | 0.569 | 0.48  |
| 1.7115644720814e-25  | 5 NEAT1 Memory 2    |       |       |
| 1.13535453448487e-29 | -0.365779935336151  | 0.641 | 0.711 |
| 2.02422359953308e-25 | 5 NDUFA4 Memory 2   |       |       |
| 1.1593137386947e-29  | 0.315311005126159   | 0.54  | 0.451 |
| 2.06694046471877e-25 | 5 JUNB Memory 2     |       |       |
| 1.1907493058731e-29  | -0.321221688210511  | 0.493 | 0.606 |
| 2.12298693744115e-25 | 5 PSMA2 Memory 2    |       |       |
| 1.46309635046311e-29 | -0.34939406314737   | 0.564 | 0.657 |
| 2.60855448324067e-25 | 5 UBE2D3 Memory 2   |       |       |
| 1.67634252680436e-29 | -0.326906597285429  | 0.396 | 0.516 |
| 2.9887510910395e-25  | 5 PSMD8 Memory 2    |       |       |
| 2.11531149035741e-29 | -0.38075785417689   | 0.506 | 0.602 |
| 3.77138885615822e-25 | 5 SEC61B Memory 2   |       |       |
| 3.29441321906123e-29 | -0.31533810213243   | 0.104 | 0.206 |
| 5.87360932826426e-25 | 5 RELB Memory 2     |       |       |
| 3.3393487171623e-29  | -0.344993539416654  | 0.241 | 0.37  |
| 5.95372482782867e-25 | 5 EIF3J Memory 2    |       |       |

|                      |                    |       |       |
|----------------------|--------------------|-------|-------|
| 3.70852413298124e-29 | -0.304423647625348 | 0.12  | 0.229 |
| 6.61192767669225e-25 | 5 HSPH1 Memory 2   |       |       |
| 3.71396963197124e-29 | -0.331314578766346 | 0.374 | 0.496 |
| 6.62163645684152e-25 | 5 CCT3 Memory 2    |       |       |
| 3.88370237935669e-29 | -0.328509787193517 | 0.329 | 0.451 |
| 6.92425297215505e-25 | 5 PGAM1 Memory 2   |       |       |
| 4.03667351353548e-29 | -0.341790299620308 | 0.303 | 0.426 |
| 7.19698520728241e-25 | 5 HNRNPD Memory 2  |       |       |
| 4.67025103706759e-29 | -0.334899165581425 | 0.567 | 0.668 |
| 8.3265905739878e-25  | 5 DBI Memory 2     |       |       |
| 5.38666820969199e-29 | -0.311799039236142 | 0.095 | 0.193 |
| 9.60389075105986e-25 | 5 PRPSAP2 Memory 2 |       |       |
| 5.40526620783454e-29 | -0.381512319565001 | 0.636 | 0.707 |
| 9.6370491219482e-25  | 5 TPI1 Memory 2    |       |       |
| 6.15078233870808e-29 | -0.3895238915228   | 0.29  | 0.406 |
| 1.09662298316826e-24 | 5 REL Memory 2     |       |       |
| 6.17389180212825e-29 | -0.310914096003256 | 0.147 | 0.262 |
| 1.10074316940145e-24 | 5 GSPT1 Memory 2   |       |       |
| 8.97375908202608e-29 | -0.309063972315803 | 0.126 | 0.233 |
| 1.59993150673443e-24 | 5 MRPL3 Memory 2   |       |       |
| 1.0532015613706e-28  | -0.341586573711975 | 0.292 | 0.415 |
| 1.87775306376764e-24 | 5 TMED9 Memory 2   |       |       |
| 1.24872696943851e-28 | -0.350889396400486 | 0.5   | 0.625 |
| 2.22635531381192e-24 | 5 CLEC2D Memory 2  |       |       |
| 1.27182617988627e-28 | -0.357483535457708 | 0.167 | 0.276 |
| 2.26753889611924e-24 | 5 SMS Memory 2     |       |       |
| 1.65676200786046e-28 | -0.304318471370116 | 0.101 | 0.201 |
| 2.95384098381442e-24 | 5 GTPBP4 Memory 2  |       |       |
| 1.93463425748605e-28 | 0.328436152325323  | 0.473 | 0.384 |
| 3.44925941767188e-24 | 5 EVI2B Memory 2   |       |       |
| 3.61189912383051e-28 | -0.315002501985062 | 0.288 | 0.413 |
| 6.43965494787741e-24 | 5 BANF1 Memory 2   |       |       |
| 6.04857501195416e-28 | 0.31890543824186   | 0.303 | 0.215 |
| 1.07840043888131e-23 | 5 LY86 Memory 2    |       |       |
| 7.42675528393765e-28 | 0.326276701924439  | 0.446 | 0.363 |
| 1.32411619957324e-23 | 5 CXXC5 Memory 2   |       |       |
| 7.43284752450669e-28 | -0.322581089015459 | 0.096 | 0.19  |
| 1.3252023851443e-23  | 5 WDR43 Memory 2   |       |       |
| 7.4337673692419e-28  | -0.323620975927676 | 0.301 | 0.426 |
| 1.32536638426214e-23 | 5 MAGOH Memory 2   |       |       |
| 7.65218619950841e-28 | -0.325285450170987 | 0.545 | 0.644 |
| 1.36430827751036e-23 | 5 ATP5MD Memory 2  |       |       |
| 8.4150763642217e-28  | -0.334987121003469 | 0.36  | 0.474 |
| 1.50032396497709e-23 | 5 SNRPF Memory 2   |       |       |
| 9.01282358449293e-28 | 0.31840900246043   | 0.415 | 0.323 |
| 1.60689631687924e-23 | 5 ZFP36 Memory 2   |       |       |
| 9.75950217734968e-28 | -0.349025502448767 | 0.076 | 0.158 |
| 1.74002164319967e-23 | 5 MCM7 Memory 2    |       |       |
| 1.12555621184698e-27 | 0.364967835636218  | 0.334 | 0.263 |
| 2.00675417010198e-23 | 5 GRN Memory 2     |       |       |

|                      |                        |       |       |
|----------------------|------------------------|-------|-------|
| 1.40146379753087e-27 | -0.336349616474073     | 0.346 | 0.462 |
| 2.49866980461779e-23 | 5 COX17 Memory 2       |       |       |
| 2.18041365565461e-27 | -0.321634916751052     | 0.539 | 0.637 |
| 3.88745950666661e-23 | 5 COX7B Memory 2       |       |       |
| 2.80750437650493e-27 | -0.37601248147967      | 0.088 | 0.18  |
| 5.00549955287063e-23 | 5 PDIA4 Memory 2       |       |       |
| 3.33956209026231e-27 | -0.308944120824404     | 0.319 | 0.441 |
| 5.95410525072867e-23 | 5 LSM3 Memory 2        |       |       |
| 7.17465803713279e-27 | -0.340160144932848     | 0.283 | 0.399 |
| 1.27916978144041e-22 | 5 PHB Memory 2         |       |       |
| 7.90114163413066e-27 | -0.30797687542898      | 0.085 | 0.173 |
| 1.40869454194915e-22 | 5 CCDC88A Memory 2     |       |       |
| 1.08825391149842e-26 | -0.315832275972428     | 0.337 | 0.458 |
| 1.94024789881054e-22 | 5 VDAC1 Memory 2       |       |       |
| 2.14468809841857e-26 | -0.313899120752921     | 0.165 | 0.276 |
| 3.82376441067048e-22 | 5 ARF4 Memory 2        |       |       |
| 2.83683670560902e-26 | -0.328669334584056     | 0.47  | 0.57  |
| 5.05779616243032e-22 | 5 SNRPB Memory 2       |       |       |
| 3.03117784925916e-26 | -0.307650927873224     | 0.274 | 0.398 |
| 5.40428698744416e-22 | 5 SSB Memory 2         |       |       |
| 3.05840727685647e-26 | -0.324086076671939     | 0.245 | 0.367 |
| 5.45283433390741e-22 | 5 TPD52 Memory 2       |       |       |
| 5.39928018278911e-26 | -0.316883714098846     | 0.317 | 0.433 |
| 9.62637663789471e-22 | 5 MINOS1 Memory 2      |       |       |
| 5.50576951317258e-26 | -1.1259252672299 0.109 | 0.179 |       |
| 9.8162364650354e-22  | 5 MZB1 Memory 2        |       |       |
| 8.16757140161642e-26 | -0.391544951539278     | 0.59  | 0.66  |
| 1.45619630519419e-21 | 5 SLC25A5 Memory 2     |       |       |
| 9.58261836673341e-26 | 0.32920815268009 0.219 | 0.156 |       |
| 1.7084850286049e-21  | 5 IL10RA Memory 2      |       |       |
| 1.41589780270965e-25 | -0.731910550490356     | 0.624 | 0.668 |
| 2.52440419245104e-21 | 5 TUBA1B Memory 2      |       |       |
| 1.41995853406571e-25 | -0.300328021367033     | 0.303 | 0.424 |
| 2.53164407038575e-21 | 5 NUDC Memory 2        |       |       |
| 2.61855674058956e-25 | -0.307667225865872     | 0.432 | 0.539 |
| 4.66862481279713e-21 | 5 SOD1 Memory 2        |       |       |
| 3.53751306992493e-25 | -0.345034772974045     | 0.15  | 0.247 |
| 6.30703205236916e-21 | 5 SLBP Memory 2        |       |       |
| 4.72093180475568e-25 | -0.323029850790808     | 0.563 | 0.649 |
| 8.41694931469891e-21 | 5 HNRNPC Memory 2      |       |       |
| 7.43295021885657e-25 | -0.303878581414195     | 0.354 | 0.471 |
| 1.32522069451994e-20 | 5 PRDX6 Memory 2       |       |       |
| 8.15169701388592e-25 | -0.339361778472766     | 0.174 | 0.283 |
| 1.45336606060572e-20 | 5 GADD45B Memory 2     |       |       |
| 1.6638856962892e-24  | -0.376016656439293     | 0.303 | 0.413 |
| 2.96654180791401e-20 | 5 PPIB Memory 2        |       |       |
| 1.84476502797732e-24 | 0.316880624098292      | 0.285 | 0.211 |
| 3.28903156838077e-20 | 5 YPEL3 Memory 2       |       |       |
| 1.96544483520775e-24 | -0.349162626126222     | 0.345 | 0.444 |
| 3.50419159669191e-20 | 5 HMGA1 Memory 2       |       |       |

|                      |                      |       |       |
|----------------------|----------------------|-------|-------|
| 1.15768293910881e-23 | 0.316065589598322    | 0.271 | 0.199 |
| 2.06403291213709e-19 | 5 BIN1 Memory 2      |       |       |
| 1.53473381067009e-23 | 0.322588634937134    | 0.155 | 0.092 |
| 2.7362769110437e-19  | 5 MT2A Memory 2      |       |       |
| 1.67291592941941e-23 | -0.385532515816746   | 0.103 | 0.181 |
| 2.98264181056186e-19 | 5 BCL2A1 Memory 2    |       |       |
| 2.53673795420052e-23 | -0.334912278657198   | 0.814 | 0.847 |
| 4.52275009854411e-19 | 5 HNRNPA2B1 Memory 2 |       |       |
| 4.06382271083504e-23 | -0.386292750884964   | 0.337 | 0.434 |
| 7.24538951114779e-19 | 5 IRF8 Memory 2      |       |       |
| 5.5920892454843e-23  | -0.301087862304224   | 0.332 | 0.445 |
| 9.97013591577395e-19 | 5 FDPS Memory 2      |       |       |
| 8.33061401178618e-23 | -0.306148353227328   | 0.335 | 0.44  |
| 1.48526517216136e-18 | 5 ROM01 Memory 2     |       |       |
| 1.4596294883789e-22  | -0.315966146249705   | 0.109 | 0.196 |
| 2.60237341483074e-18 | 5 MANF Memory 2      |       |       |
| 1.94545338590323e-22 | -0.302108207622117   | 0.429 | 0.534 |
| 3.46854884172687e-18 | 5 SPCS2 Memory 2     |       |       |
| 2.17640300644564e-22 | -0.310690703393572   | 0.879 | 0.896 |
| 3.88030892019194e-18 | 5 PPIA Memory 2      |       |       |
| 3.33023855408454e-22 | -0.316750488457681   | 0.172 | 0.267 |
| 5.93748231807732e-18 | 5 ANP32E Memory 2    |       |       |
| 4.10563388612068e-22 | -0.492935973272227   | 0.926 | 0.932 |
| 7.31993465556456e-18 | 5 HMGB1 Memory 2     |       |       |
| 4.50932141252592e-22 | -0.340527037930102   | 0.325 | 0.431 |
| 8.03966914639247e-18 | 5 CD40 Memory 2      |       |       |
| 4.97524733193053e-22 | -0.326232918912849   | 0.124 | 0.212 |
| 8.87036846809895e-18 | 5 PIM3 Memory 2      |       |       |
| 5.42903198038469e-22 | -0.300744467655216   | 0.155 | 0.251 |
| 9.67942111782787e-18 | 5 DKC1 Memory 2      |       |       |
| 2.17957041234392e-21 | -0.343423051209689   | 0.462 | 0.544 |
| 3.88595608816797e-17 | 5 PARP1 Memory 2     |       |       |
| 2.64652531769424e-21 | -0.311818520686173   | 0.191 | 0.286 |
| 4.71848998891707e-17 | 5 JPT1 Memory 2      |       |       |
| 5.02114266694408e-21 | -0.304700601335716   | 0.062 | 0.124 |
| 8.95219526089459e-17 | 5 LPP Memory 2       |       |       |
| 6.52821273772523e-21 | -0.555667869342711   | 0.235 | 0.316 |
| 1.16391504900903e-16 | 5 HSP90B1 Memory 2   |       |       |
| 8.98720185272002e-21 | -0.312387610697209   | 0.383 | 0.484 |
| 1.60232821832145e-16 | 5 RSL1D1 Memory 2    |       |       |
| 1.43537668815899e-20 | -0.301095090223586   | 0.221 | 0.314 |
| 2.55913309731867e-16 | 5 CALM3 Memory 2     |       |       |
| 2.47091644525537e-20 | -0.327800410647429   | 0.115 | 0.192 |
| 4.4053969302458e-16  | 5 PCNA Memory 2      |       |       |
| 3.66378793744732e-20 | -0.333579292027423   | 0.138 | 0.222 |
| 6.53216751367484e-16 | 5 EIF4EBP1 Memory 2  |       |       |
| 4.0736680216085e-20  | -0.303899252722106   | 0.08  | 0.15  |
| 7.26294271572579e-16 | 5 SDF2L1 Memory 2    |       |       |
| 5.99669378833286e-20 | -0.376494839576641   | 0.27  | 0.357 |
| 1.06915053552187e-15 | 5 TUBB4B Memory 2    |       |       |

|                       |                     |           |       |   |
|-----------------------|---------------------|-----------|-------|---|
| 2.81331111826925e-19  | -0.311576178777263  | 0.16      | 0.245 |   |
| 5.01585239276225e-15  | 5 MYDGF Memory 2    |           |       |   |
| 6.56275491494715e-19  | -0.326640649034753  | 0.233     | 0.333 |   |
| 1.17007357378593e-14  | 5 HNRNP1 Memory 2   |           |       |   |
| 2.37158815366383e-18  | -0.307125693867583  | 0.218     | 0.307 |   |
| 4.22830451916724e-14  | 5 BCL7A Memory 2    |           |       |   |
| 3.92326891388963e-18  | 0.313230142202388   | 0.216     | 0.156 |   |
| 6.99479614657383e-14  | 5 LMNA Memory 2     |           |       |   |
| 5.64178391418282e-18  | -0.372118721900643  | 0.286     | 0.363 |   |
| 1.00587365405966e-13  | 5 H2AFV Memory 2    |           |       |   |
| 2.43810777258184e-16  | -0.333527506932851  | 0.18      | 0.26  |   |
| 4.34690234773617e-12  | 5 SRGN Memory 2     |           |       |   |
| 1.45552645558174e-15  | -1.18074332440225   | 0.372     | 0.425 |   |
| 2.59505811765668e-11  | 5 HIST1H4C Memory 2 |           |       |   |
| 1.48823005151973e-15  | -0.336170224101926  | 0.496     | 0.555 |   |
| 2.65336535885453e-11  | 5 TCEA1 Memory 2    |           |       |   |
| 1.70654309754392e-14  | -0.707542398566339  | 0.143     | 0.215 |   |
| 3.04259568861105e-10  | 5 PLCG2 Memory 2    |           |       |   |
| 1.95130144740403e-13  | -0.306367362342757  | 0.223     | 0.299 |   |
| 3.47897535057664e-09  | 5 NFKBIA Memory 2   |           |       |   |
| 1.09795853629894e-12  | -0.375192522641948  | 0.946     | 0.932 |   |
| 1.95755027436738e-08  | 5 SERF2 Memory 2    |           |       |   |
| 3.78051368956583e-12  | -0.306207725437154  | 0.549     | 0.599 |   |
| 6.74027785712693e-08  | 5 LDHA Memory 2     |           |       |   |
| 5.74863588601693e-12  | -0.307320333168369  | 0.273     | 0.338 |   |
| 1.02492429211796e-07  | 5 DUT Memory 2      |           |       |   |
| 6.9918980213068e-11   | -2.80988827290323   | 0.415     | 0.452 |   |
| 1.24658549821879e-06  | 5 IGHG3 Memory 2    |           |       |   |
| 1.20408344568254e-08  | -0.404712146944625  | 0.45      | 0.502 |   |
| 0.00021467603753074   | 5 SSR4 Memory 2     |           |       |   |
| 8.24632703104549e-08  | -1.79201914520005   | 0.202     | 0.245 |   |
| 0.0014702376463651    | 5 IGHG4 Memory 2    |           |       |   |
| 8.65272949800815e-07  | -0.392702218188867  | 0.917     | 0.886 |   |
| 0.0154269514219987    | 5 GAPDH Memory 2    |           |       |   |
| 2.46948560312665e-06  | -1.10009158254028   | 0.194     | 0.217 |   |
| 0.0440284588181451    | 5 IGHG1 Memory 2    |           |       |   |
| 5.44735213563976e-06  | -1.44366581449754   | 0.58      | 0.648 |   |
| 0.0971208412263213    | 5 IGLC2 Memory 2    |           |       |   |
| 0.000450654996379107  | -1.16186517260333   | 0.389     | 0.431 | 1 |
| 5 IGLC3               | Memory 2            |           |       |   |
| 0.00651123411709557   | -0.936178757082279  | 0.409     | 0.403 | 1 |
| 5 JCHAIN              | Memory 2            |           |       |   |
| 0 1.76330988680316    | 0.837 0.456 0 6     |           | CD83  |   |
| Activated             |                     |           |       |   |
| 9.54509764543913e-295 | 1.66689410718752    | 0.611     | 0.273 |   |
| 1.70179545920534e-290 | 6 MIR155HG          | Activated |       |   |
| 2.56257449255987e-250 | 0.691505835243175   | 0.984     | 0.963 |   |
| 4.56881406278499e-246 | 6 EIF1              | Activated |       |   |
| 2.5545739835501e-240  | 1.25223423551443    | 0.559     | 0.284 |   |
| 4.55454995527147e-236 | 6 NFKBIA            | Activated |       |   |



|                       |                    |          |           |       |
|-----------------------|--------------------|----------|-----------|-------|
| 4.65201977829976e-214 | 1.11971619913042   | 0.775    | 0.533     |       |
| 8.29408606273063e-210 | 6                  | CCR7     | Activated |       |
| 5.09260347972239e-194 | 1.12635227880653   | 0.388    | 0.154     |       |
| 9.07960274399705e-190 | 6                  | MARCKS   | Activated |       |
| 1.73675855352929e-184 | 1.17133894595117   | 0.559    | 0.305     |       |
| 3.09646682508738e-180 | 6                  | CD69     | Activated |       |
| 3.08071395959373e-181 | 1.1599921478556    | 0.38     | 0.168     |       |
| 5.49260491855967e-177 | 6                  | BCL2A1   | Activated |       |
| 6.72758239198122e-169 | 1.00820653309209   | 0.601    | 0.391     |       |
| 1.19946066466633e-164 | 6                  | REL      | Activated |       |
| 4.35540181100626e-159 | 0.920143601521351  |          | 0.331     | 0.125 |
| 7.76524588884307e-155 | 6                  | NFKB2    | Activated |       |
| 1.18911799339941e-145 | -1.00012116714407  |          | 0.757     | 0.894 |
| 2.1200784704318e-141  | 6                  | GAPDH    | Activated |       |
| 2.39156861208135e-144 | -1.0543668668376   | 0.063    | 0.314     |       |
| 4.26392767847984e-140 | 6                  | CD27     | Activated |       |
| 2.53186490231316e-128 | 0.853123500307269  |          | 0.331     | 0.157 |
| 4.51406193433413e-124 | 6                  | NFKB1    | Activated |       |
| 1.47406104627242e-120 | 0.800571754152299  |          | 0.208     | 0.068 |
| 2.6281034393991e-116  | 6                  | TRAF1    | Activated |       |
| 3.12942117011764e-120 | 0.555070530923867  |          | 0.956     | 0.903 |
| 5.57944500420274e-116 | 6                  | HLA-A    | Activated |       |
| 3.05980781450157e-117 | 0.710672786122217  |          | 0.842     | 0.692 |
| 5.45533135247485e-113 | 6                  | EMP3     | Activated |       |
| 4.53991493009897e-114 | 0.829090211635042  |          | 0.574     | 0.419 |
| 8.09421432887346e-110 | 6                  | CD40     | Activated |       |
| 2.62409989490249e-110 | -0.650235876738798 |          | 0.68      | 0.876 |
| 4.67850770262166e-106 | 6                  | CD52     | Activated |       |
| 4.6511075049957e-103  | -0.802744052400285 |          | 0.611     | 0.793 |
| 8.29245957065684e-99  | 6                  | ACTG1    | Activated |       |
| 6.2937604342416e-99   | 0.820363681246196  |          | 0.473     | 0.311 |
| 1.12211454782093e-94  | 6                  | DDX21    | Activated |       |
| 8.79406292878326e-99  | -1.22684736796917  |          | 0.042     | 0.213 |
| 1.56789347957277e-94  | 6                  | RGS13    | Activated |       |
| 9.78153598946906e-98  | -0.59976569186289  |          | 0.576     | 0.785 |
| 1.74395005156244e-93  | 6                  | ARHGDIB  | Activated |       |
| 1.28963775313861e-96  | 0.81214842103345   | 0.331    | 0.184     |       |
| 2.29929515007083e-92  | 6                  | RNF145   | Activated |       |
| 4.1401092736364e-95   | 0.883907067118808  |          | 0.294     | 0.124 |
| 7.38140082396634e-91  | 6                  | MYC      | Activated |       |
| 2.04038791943317e-93  | -0.73458420323735  |          | 0.211     | 0.447 |
| 3.6378076215574e-89   | 6                  | COTL1    | Activated |       |
| 1.05555184069628e-92  | 0.678613074486254  |          | 0.733     | 0.605 |
| 1.8819433767774e-88   | 6                  | SYNGR2   | Activated |       |
| 2.13048187840004e-91  | 0.892739511398516  |          | 0.282     | 0.146 |
| 3.79843614099944e-87  | 6                  | NFKBID   | Activated |       |
| 2.35691110894162e-91  | -0.621518931436461 |          | 0.578     | 0.783 |
| 4.20213681613202e-87  | 6                  | HLA-DPB1 | Activated |       |
| 1.1701123624479e-89   | 0.422739356097769  |          | 0.931     | 0.844 |
| 2.08619333100835e-85  | 6                  | HSP90AB1 | Activated |       |

|                      |                      |       |       |
|----------------------|----------------------|-------|-------|
| 3.13857526453603e-89 | 0.737785968184714    | 0.633 | 0.496 |
| 5.59576583914129e-85 | 6 FOXP1 Activated    |       |       |
| 1.34203914338274e-83 | 0.713667029629386    | 0.487 | 0.342 |
| 2.39272158873708e-79 | 6 LITAF Activated    |       |       |
| 1.58907872027982e-81 | -0.499054883812594   | 0.694 | 0.863 |
| 2.83316845038689e-77 | 6 CD79B Activated    |       |       |
| 1.87642043202712e-81 | 0.719780495628823    | 0.311 | 0.165 |
| 3.34546998826116e-77 | 6 BCL2 Activated     |       |       |
| 2.66571082195996e-81 | 0.653672936560244    | 0.751 | 0.644 |
| 4.75269582447242e-77 | 6 ZFP36L1 Activated  |       |       |
| 3.56141889606716e-80 | 0.44863940471655     | 0.106 | 0.022 |
| 6.34965374979813e-76 | 6 IL2RA Activated    |       |       |
| 3.52750200221624e-79 | -0.578450792342877   | 0.022 | 0.167 |
| 6.28918331975134e-75 | 6 SUSD3 Activated    |       |       |
| 6.22795496669767e-77 | 0.760894464454589    | 0.311 | 0.166 |
| 1.11038209101253e-72 | 6 TNFRSF18 Activated |       |       |
| 2.34569716906941e-75 | -0.657656618657107   | 0.07  | 0.244 |
| 4.18214348273385e-71 | 6 GCHFR Activated    |       |       |
| 5.0360498719947e-75  | -0.369586750440784   | 0.954 | 0.991 |
| 8.97877331677935e-71 | 6 CD74 Activated     |       |       |
| 2.49520791012267e-74 | 0.743982070667126    | 0.456 | 0.321 |
| 4.4487061829577e-70  | 6 PMAIP1 Activated   |       |       |
| 1.39343922965446e-73 | 0.643490541482651    | 0.351 | 0.214 |
| 2.48436280255093e-69 | 6 TRAF4 Activated    |       |       |
| 3.76146336192362e-73 | -0.741215591856361   | 0.334 | 0.542 |
| 6.70631302797363e-69 | 6 ISG20 Activated    |       |       |
| 4.57388426608629e-72 | -0.628034216260117   | 0.109 | 0.296 |
| 8.15477825800524e-68 | 6 BCAS4 Activated    |       |       |
| 2.52099360720705e-71 | -0.66064359502905    | 0.021 | 0.154 |
| 4.49467950228945e-67 | 6 BIK Activated      |       |       |
| 5.21755014158019e-70 | 0.731655180644138    | 0.447 | 0.321 |
| 9.30237014742332e-66 | 6 SLC3A2 Activated   |       |       |
| 5.80300751338683e-70 | -0.576014628946939   | 0.301 | 0.525 |
| 1.03461820956174e-65 | 6 LSP1 Activated     |       |       |
| 1.20540263374002e-69 | -0.495525603642033   | 0.011 | 0.123 |
| 2.14911235569509e-65 | 6 CD38 Activated     |       |       |
| 4.90729413025706e-69 | 0.736201532156346    | 0.373 | 0.264 |
| 8.74921470483532e-65 | 6 PIM1 Activated     |       |       |
| 5.70044000827809e-69 | -0.506606538650843   | 0.024 | 0.159 |
| 1.0163314490759e-64  | 6 CD81 Activated     |       |       |
| 4.43415055194658e-65 | -0.537864895309503   | 0.358 | 0.565 |
| 7.90564701906555e-61 | 6 ATP5IF1 Activated  |       |       |
| 1.29080834659847e-62 | 0.592518331052948    | 0.217 | 0.104 |
| 2.30138220115041e-58 | 6 SNX9 Activated     |       |       |
| 4.77247068605929e-61 | -0.537158078014528   | 0.011 | 0.113 |
| 8.5088379861751e-57  | 6 VPRESB3 Activated  |       |       |
| 2.0856565684012e-58  | 0.619465581510375    | 0.267 | 0.158 |
| 3.7185170958025e-54  | 6 CD58 Activated     |       |       |
| 2.06637150560794e-57 | 0.597389691569123    | 0.347 | 0.227 |
| 3.68413375734839e-53 | 6 TARS Activated     |       |       |

|                      |                    |          |           |
|----------------------|--------------------|----------|-----------|
| 3.38907767865746e-57 | 0.59499125338998   | 0.575    | 0.471     |
| 6.04238659327839e-53 | 6                  | TNFAIP8  | Activated |
| 3.9994306168758e-56  | -0.328202745861522 | 0.661    | 0.821     |
| 7.13058484682787e-52 | 6                  | HLA-DPA1 | Activated |
| 1.09419036692958e-55 | 0.596004475772695  | 0.324    | 0.212     |
| 1.95083200519874e-51 | 6                  | NFKBIE   | Activated |
| 1.46758980508761e-55 | -0.45906672223125  | 0.062    | 0.215     |
| 2.61656586349071e-51 | 6                  | GLRX     | Activated |
| 1.01088576438032e-54 | -1.02023016736904  | 0.124    | 0.269     |
| 1.80230822931367e-50 | 6                  | S100A4   | Activated |
| 1.10453000055778e-54 | 0.550742992117331  | 0.216    | 0.113     |
| 1.96926653799447e-50 | 6                  | SLAMF1   | Activated |
| 1.25016007550052e-54 | -0.498890684340658 | 0.404    | 0.587     |
| 2.22891039860987e-50 | 6                  | LDHB     | Activated |
| 1.80084844610819e-54 | -0.515565422579718 | 0.024    | 0.139     |
| 3.21073269456629e-50 | 6                  | NEIL1    | Activated |
| 3.20115778703457e-54 | -1.30596902338242  | 0.053    | 0.181     |
| 5.70734421850393e-50 | 6                  | MZB1     | Activated |
| 7.03897302610154e-54 | 0.552195621741369  | 0.168    | 0.083     |
| 1.25497850082364e-49 | 6                  | EBI3     | Activated |
| 2.2868503291623e-53  | -1.54680932862325  | 0.166    | 0.308     |
| 4.07722545186346e-49 | 6                  | HMGB2    | Activated |
| 1.83576904641468e-52 | -0.52800644936148  | 0.304    | 0.497     |
| 3.27299263285273e-48 | 6                  | UCP2     | Activated |
| 2.87626175487539e-52 | 0.536849504593752  | 0.203    | 0.115     |
| 5.12808708276733e-48 | 6                  | PN01     | Activated |
| 3.54755288639395e-52 | 0.608650312226024  | 0.256    | 0.164     |
| 6.32493204115178e-48 | 6                  | SNHG15   | Activated |
| 4.12044849726963e-52 | -0.414431398256204 | 0.029    | 0.145     |
| 7.34634762578203e-48 | 6                  | AIM2     | Activated |
| 8.85621816525667e-52 | 0.770619050854771  | 0.336    | 0.252     |
| 1.57897513668361e-47 | 6                  | SRGN     | Activated |
| 1.04068654387143e-51 | -0.32567990709656  | 0.013    | 0.107     |
| 1.85544003906837e-47 | 6                  | SEMA4A   | Activated |
| 1.47538176281013e-51 | -0.662551491620371 | 0.129    | 0.28      |
| 2.63045814491418e-47 | 6                  | KLF2     | Activated |
| 2.29023845547552e-51 | -0.545685347303282 | 0.873    | 0.934     |
| 4.0832661422673e-47  | 6                  | HMGB1    | Activated |
| 2.3924104284256e-51  | -0.538807530975041 | 0.438    | 0.612     |
| 4.26542855284001e-47 | 6                  | DYNLL1   | Activated |
| 4.57814489185346e-51 | 0.441397752211991  | 0.107    | 0.032     |
| 8.16237452768554e-47 | 6                  | IL13RA1  | Activated |
| 1.69460104183304e-50 | -0.493521008309863 | 0.082    | 0.225     |
| 3.02130419748412e-46 | 6                  | LY86     | Activated |
| 7.1043308567257e-50  | 0.59474919728404   | 0.296    | 0.206     |
| 1.26663114844563e-45 | 6                  | CFLAR    | Activated |
| 1.59977055183502e-49 | -0.338783462679419 | 0.018    | 0.121     |
| 2.85223091686665e-45 | 6                  | ABI3     | Activated |
| 2.86184686938909e-49 | 0.66298015579841   | 0.552    | 0.475     |
| 5.10238678343381e-45 | 6                  | SQSTM1   | Activated |

|                      |                        |       |       |
|----------------------|------------------------|-------|-------|
| 3.25667570484216e-49 | -0.496687551521118     | 0.118 | 0.281 |
| 5.8063271141631e-45  | 6 NCF1 Activated       |       |       |
| 3.88892688107755e-48 | 0.433906656140508      | 0.138 | 0.06  |
| 6.93356773627316e-44 | 6 ZC3H12A Activated    |       |       |
| 9.84058593961547e-48 | 0.37068313270537 0.1   | 0.035 |       |
| 1.75447806717404e-43 | 6 TNFAIP3 Activated    |       |       |
| 2.89148040905017e-47 | -1.64709279058012      | 0.274 | 0.409 |
| 5.15522042129555e-43 | 6 JCHAIN Activated     |       |       |
| 1.10477491522741e-46 | 0.539586986748585      | 0.308 | 0.204 |
| 1.96970319635895e-42 | 6 PIM3 Activated       |       |       |
| 1.31183811569754e-46 | -0.415800949580075     | 0.047 | 0.174 |
| 2.33887617647714e-42 | 6 SEL1L3 Activated     |       |       |
| 2.37166654962178e-46 | -0.352196331003539     | 0.021 | 0.125 |
| 4.22844429132067e-42 | 6 VNN2 Activated       |       |       |
| 6.84590646381849e-46 | 0.602993309237911      | 0.369 | 0.281 |
| 1.2205566634342e-41  | 6 CD82 Activated       |       |       |
| 7.30875561393145e-46 | 0.603058785605809      | 0.234 | 0.133 |
| 1.30307803840784e-41 | 6 FCER2 Activated      |       |       |
| 2.86797268981337e-45 | -0.339626613265466     | 0.974 | 0.99  |
| 5.11330850866826e-41 | 6 ACTB Activated       |       |       |
| 3.64434506252916e-45 | -0.554252976864404     | 0.102 | 0.24  |
| 6.49750281198323e-41 | 6 UBE2J1 Activated     |       |       |
| 3.99300076398675e-45 | 0.52324015665268 0.198 | 0.119 |       |
| 7.11912106211198e-41 | 6 MAP3K8 Activated     |       |       |
| 4.8264813058622e-45  | -0.510857970330092     | 0.072 | 0.208 |
| 8.60513352022171e-41 | 6 HMCES Activated      |       |       |
| 6.30587312673591e-45 | -0.35531408229218      | 0.015 | 0.11  |
| 1.12427411976575e-40 | 6 HRK Activated        |       |       |
| 8.99433936250957e-45 | -0.384566728714864     | 0.032 | 0.143 |
| 1.60360076494183e-40 | 6 SIT1 Activated       |       |       |
| 1.8792411273165e-44  | -0.334671232357808     | 0.015 | 0.105 |
| 3.35049900589259e-40 | 6 MYBL2 Activated      |       |       |
| 2.9469107765716e-44  | 0.401640161950095      | 0.119 | 0.051 |
| 5.25404722354951e-40 | 6 NFKBIZ Activated     |       |       |
| 6.12023388139715e-44 | -0.406982750829599     | 0.193 | 0.374 |
| 1.0911764987143e-39  | 6 CXXC5 Activated      |       |       |
| 9.95316999401905e-44 | -0.352259868199507     | 0.498 | 0.677 |
| 1.77455067823366e-39 | 6 SNX3 Activated       |       |       |
| 1.35239807158522e-43 | -0.314638624276895     | 0.88  | 0.94  |
| 2.41119052182929e-39 | 6 EEF2 Activated       |       |       |
| 1.92704427125861e-43 | 0.372599917602869      | 0.942 | 0.935 |
| 3.43572723122697e-39 | 6 BTG1 Activated       |       |       |
| 5.83392394968837e-43 | -0.36994881519648      | 0.026 | 0.123 |
| 1.04013030098994e-38 | 6 PYCARD Activated     |       |       |
| 5.84426177869035e-43 | -0.433611833916316     | 0.327 | 0.497 |
| 1.0419734325227e-38  | 6 CBX3 Activated       |       |       |
| 1.11904144844516e-42 | -0.374004690234648     | 0.075 | 0.214 |
| 1.99513899843287e-38 | 6 TCEAL8 Activated     |       |       |
| 1.45652404189674e-42 | -0.374995187501687     | 0.036 | 0.144 |
| 2.5968367142977e-38  | 6 SOCS1 Activated      |       |       |

|                      |                        |       |       |
|----------------------|------------------------|-------|-------|
| 5.27963370356288e-42 | -0.444976245840095     | 0.704 | 0.819 |
| 9.41305893008226e-38 | 6 COR01A Activated     |       |       |
| 6.09459241880887e-42 | -0.462444406301645     | 0.083 | 0.217 |
| 1.08660488234943e-37 | 6 FAM111B Activated    |       |       |
| 8.9400648993298e-42  | 0.484820778484194      | 0.162 | 0.092 |
| 1.59392417090151e-37 | 6 FCRL5 Activated      |       |       |
| 9.54694453703074e-42 | 0.410000360686793      | 0.147 | 0.073 |
| 1.70212474150721e-37 | 6 GPR137 Activated     |       |       |
| 1.53789310384494e-41 | 0.526276162474787      | 0.52  | 0.434 |
| 2.74190961484514e-37 | 6 IL2RG Activated      |       |       |
| 1.56945294793244e-41 | -0.371136242654841     | 0.019 | 0.107 |
| 2.79817766086874e-37 | 6 RMI2 Activated       |       |       |
| 1.59893333819109e-41 | -0.342685976292006     | 0.022 | 0.115 |
| 2.85073824866089e-37 | 6 AC023590.1 Activated |       |       |
| 2.23397073862975e-41 | 0.580101623494554      | 0.331 | 0.247 |
| 3.98294642990298e-37 | 6 SDCBP Activated      |       |       |
| 4.16210137411253e-41 | -0.505402284152386     | 0.071 | 0.196 |
| 7.42061053990523e-37 | 6 DAAM1 Activated      |       |       |
| 5.56856300669953e-41 | -0.472409434863173     | 0.219 | 0.382 |
| 9.92819098464459e-37 | 6 ACADM Activated      |       |       |
| 9.97236910396607e-41 | -0.315168612603578     | 0.623 | 0.77  |
| 1.77797368754611e-36 | 6 MYL12A Activated     |       |       |
| 1.05518928495499e-40 | -0.380241919718778     | 0.05  | 0.17  |
| 1.88129697614625e-36 | 6 DEF8 Activated       |       |       |
| 3.55043789705422e-40 | -0.457445119181167     | 0.107 | 0.242 |
| 6.33007572665797e-36 | 6 CCND3 Activated      |       |       |
| 4.70528635098836e-40 | -0.434334798157473     | 0.388 | 0.547 |
| 8.38905503517715e-36 | 6 PARP1 Activated      |       |       |
| 5.32780764849205e-40 | 0.417101334179959      | 0.158 | 0.083 |
| 9.49894825649648e-36 | 6 IER5 Activated       |       |       |
| 6.75970004087662e-40 | -0.413598590466707     | 0.236 | 0.411 |
| 1.20518692028789e-35 | 6 STX7 Activated       |       |       |
| 9.04839275990658e-40 | 0.47477004546375       | 0.614 | 0.526 |
| 1.61323794516374e-35 | 6 PSME2 Activated      |       |       |
| 1.37006266687239e-39 | 0.38461097250105       | 0.978 | 0.976 |
| 2.44268472876679e-35 | 6 FTH1 Activated       |       |       |
| 1.51488345804456e-39 | 0.549470123252749      | 0.473 | 0.379 |
| 2.70088571734765e-35 | 6 CD44 Activated       |       |       |
| 3.19452371050676e-39 | -0.428548131178469     | 0.2   | 0.371 |
| 5.69551632346249e-35 | 6 RCSD1 Activated      |       |       |
| 3.38612529534979e-39 | 0.503597077363592      | 0.279 | 0.198 |
| 6.03712278907914e-35 | 6 RELB Activated       |       |       |
| 5.25276719126525e-39 | -0.522609648714473     | 0.207 | 0.355 |
| 9.36515862530682e-35 | 6 S100A10 Activated    |       |       |
| 9.32041110303954e-39 | 0.411660216368061      | 0.127 | 0.06  |
| 1.66173609556092e-34 | 6 PTGER4 Activated     |       |       |
| 9.59102759042488e-39 | -0.52295527098738      | 0.09  | 0.202 |
| 1.70998430909685e-34 | 6 ACP5 Activated       |       |       |
| 1.09540042069095e-38 | 0.467937303425898      | 0.222 | 0.139 |
| 1.9529894100499e-34  | 6 NOP16 Activated      |       |       |

|                      |                      |       |       |
|----------------------|----------------------|-------|-------|
| 1.48868189005096e-38 | -0.374595933283387   | 0.684 | 0.805 |
| 2.65417094177186e-34 | 6 LPTM5 Activated    |       |       |
| 1.81638262491592e-38 | 0.500420743032411    | 0.266 | 0.182 |
| 3.2384285819626e-34  | 6 WDR43 Activated    |       |       |
| 6.00508731871987e-38 | -0.330692608437629   | 0.044 | 0.154 |
| 1.07064701805457e-33 | 6 PTPN18 Activated   |       |       |
| 8.95599313279248e-38 | -2.99028390082579    | 0.325 | 0.456 |
| 1.59676401564557e-33 | 6 IGHG3 Activated    |       |       |
| 1.19239738883102e-37 | -0.393444313592141   | 0.146 | 0.295 |
| 2.12592530454683e-33 | 6 C7orf50 Activated  |       |       |
| 1.79344627451807e-37 | 0.468548632904548    | 0.182 | 0.108 |
| 3.19753536283827e-33 | 6 ZNF267 Activated   |       |       |
| 5.71524828694973e-37 | 0.698905649718433    | 0.403 | 0.342 |
| 1.01897161708027e-32 | 6 INSIG1 Activated   |       |       |
| 5.76260504684112e-37 | -0.378405339856883   | 0.326 | 0.499 |
| 1.0274148538013e-32  | 6 RAC2 Activated     |       |       |
| 6.64273349709781e-37 | 0.475018686814876    | 0.272 | 0.201 |
| 1.18433295519757e-32 | 6 UBALD2 Activated   |       |       |
| 7.26753932685356e-37 | 0.483785169810473    | 0.645 | 0.583 |
| 1.29572958658472e-32 | 6 EIF2S2 Activated   |       |       |
| 7.36696542724549e-37 | -0.399349522283157   | 0.054 | 0.165 |
| 1.3134562660236e-32  | 6 C12orf75 Activated |       |       |
| 1.39742455910346e-36 | -0.388257526053088   | 0.168 | 0.325 |
| 2.49146824642555e-32 | 6 FCRLA Activated    |       |       |
| 2.24541862485811e-36 | 0.436445861831315    | 0.216 | 0.138 |
| 4.00335686625953e-32 | 6 TM2D3 Activated    |       |       |
| 2.4005311303689e-36  | 0.535887890124844    | 0.394 | 0.319 |
| 4.27990695233471e-32 | 6 NOP56 Activated    |       |       |
| 5.015184330241e-36   | -0.382682185932403   | 0.143 | 0.29  |
| 8.94157214238668e-32 | 6 CARHSP1 Activated  |       |       |
| 8.24562787041861e-36 | -0.393652378757721   | 0.087 | 0.212 |
| 1.47011299301693e-31 | 6 EAF2 Activated     |       |       |
| 9.9688347331256e-36  | 0.422112263204257    | 0.192 | 0.118 |
| 1.77734354456896e-31 | 6 PAK1IP1 Activated  |       |       |
| 4.4391059885012e-35  | -0.322288747378622   | 0.028 | 0.117 |
| 7.9144820668988e-31  | 6 TNFRSF17 Activated |       |       |
| 7.38726376227729e-35 | 0.406235625479666    | 0.144 | 0.083 |
| 1.31707525617642e-30 | 6 SLC43A3 Activated  |       |       |
| 7.97146562462276e-35 | -0.654389330993687   | 0.084 | 0.195 |
| 1.42123260621399e-30 | 6 PTTG1 Activated    |       |       |
| 9.17500974522252e-35 | -0.346346905984628   | 0.21  | 0.367 |
| 1.63581248747572e-30 | 6 TKT Activated      |       |       |
| 9.39010812328505e-35 | -0.365560259291517   | 0.173 | 0.328 |
| 1.67416237730049e-30 | 6 NAA38 Activated    |       |       |
| 1.40654903988562e-34 | 0.494188825742857    | 0.539 | 0.477 |
| 2.50773628321207e-30 | 6 RSL1D1 Activated   |       |       |
| 1.7353935875847e-34  | 0.4407999051456      | 0.818 | 0.792 |
| 3.09403322730476e-30 | 6 HLA-E Activated    |       |       |
| 2.84004888566984e-34 | -0.357234536406682   | 0.118 | 0.26  |
| 5.06352315826075e-30 | 6 TBC1D10C Activated |       |       |

|                      |                     |       |       |
|----------------------|---------------------|-------|-------|
| 3.22579700463292e-34 | -0.348866059533829  | 0.175 | 0.335 |
| 5.75127347956003e-30 | 6 GYPC Activated    |       |       |
| 3.73118506088424e-34 | -0.432416985019054  | 0.14  | 0.272 |
| 6.65232984505052e-30 | 6 HHEX Activated    |       |       |
| 3.78482943010891e-34 | -0.325578319764328  | 0.044 | 0.148 |
| 6.74797239094117e-30 | 6 HSH2D Activated   |       |       |
| 4.59291020584464e-34 | -0.337987932078725  | 0.093 | 0.222 |
| 8.18869960600041e-30 | 6 PNKD Activated    |       |       |
| 4.90680797353089e-34 | -0.336095588791394  | 0.184 | 0.343 |
| 8.74834793600823e-30 | 6 SEPHS2 Activated  |       |       |
| 7.59496211838131e-34 | -0.472259731930115  | 0.169 | 0.308 |
| 1.3541057960862e-29  | 6 ZFP36L2 Activated |       |       |
| 8.36495747259032e-34 | -0.338965313014217  | 0.179 | 0.337 |
| 1.49138826778813e-29 | 6 CCM2 Activated    |       |       |
| 8.86917490665312e-34 | -0.367877571548401  | 0.169 | 0.32  |
| 1.58128519410718e-29 | 6 HMGN3 Activated   |       |       |
| 9.04980026264023e-34 | -0.300433118023695  | 0.397 | 0.571 |
| 1.6134888882613e-29  | 6 ERP29 Activated   |       |       |
| 1.188571895501e-33   | 0.46188170370319    | 0.526 | 0.454 |
| 2.11910483248873e-29 | 6 SFPQ Activated    |       |       |
| 7.30556020436964e-33 | -0.368920287485568  | 0.072 | 0.191 |
| 1.30250832883706e-28 | 6 P2RX5 Activated   |       |       |
| 1.41213513906915e-32 | -0.338499774785496  | 0.113 | 0.246 |
| 2.51769573944638e-28 | 6 MCUB Activated    |       |       |
| 2.16539205643714e-32 | -0.377261057359486  | 0.037 | 0.124 |
| 3.86067749742178e-28 | 6 LPP Activated     |       |       |
| 3.17291529740903e-32 | 0.46193829120766    | 0.469 | 0.401 |
| 5.65699068375056e-28 | 6 BZW1 Activated    |       |       |
| 5.4815341709806e-32  | -0.459537390170818  | 0.106 | 0.216 |
| 9.77302727344131e-28 | 6 LBH Activated     |       |       |
| 7.13862798934643e-32 | 0.506852693597243   | 0.132 | 0.079 |
| 1.27274598422058e-27 | 6 SNHG12 Activated  |       |       |
| 9.29823167604983e-32 | -0.353614992588757  | 0.061 | 0.173 |
| 1.65778172552292e-27 | 6 CCDC88A Activated |       |       |
| 1.08692386776718e-31 | -0.329431997227524  | 0.178 | 0.325 |
| 1.9378765638421e-27  | 6 PRDX2 Activated   |       |       |
| 1.29895412076463e-31 | -0.404516487686459  | 0.166 | 0.309 |
| 2.31590530191126e-27 | 6 BCL7A Activated   |       |       |
| 1.4264137885334e-31  | -0.348342465640202  | 0.251 | 0.409 |
| 2.54315314357621e-27 | 6 MBD4 Activated    |       |       |
| 2.0025604610898e-31  | 0.470393982091084   | 0.495 | 0.432 |
| 3.57036504607701e-27 | 6 EIF5B Activated   |       |       |
| 2.2143909939994e-31  | -0.352977510170255  | 0.359 | 0.513 |
| 3.94803770320153e-27 | 6 MZT2B Activated   |       |       |
| 4.4044770748026e-31  | -1.33991700341741   | 0.119 | 0.22  |
| 7.85274217666556e-27 | 6 IGHG1 Activated   |       |       |
| 1.01738885994723e-30 | 0.455873625648127   | 0.252 | 0.185 |
| 1.81390259839992e-26 | 6 GPATCH4 Activated |       |       |
| 1.08838904269344e-30 | -0.314968473776672  | 0.111 | 0.238 |
| 1.94048882421813e-26 | 6 CHCHD10 Activated |       |       |

|                      |                       |       |       |
|----------------------|-----------------------|-------|-------|
| 1.38962254574289e-30 | -0.433081910068876    | 0.898 | 0.935 |
| 2.47755803680499e-26 | 6 SERF2 Activated     |       |       |
| 2.40431236846439e-30 | 0.478223111428586     | 0.377 | 0.317 |
| 4.28664852173516e-26 | 6 RHOG Activated      |       |       |
| 2.56792631654416e-30 | -0.316672176164162    | 0.035 | 0.119 |
| 4.57835582976659e-26 | 6 GMDS Activated      |       |       |
| 5.36213707891688e-30 | -0.354688769609061    | 0.162 | 0.299 |
| 9.5601541980009e-26  | 6 BCL11A Activated    |       |       |
| 7.00472117796108e-30 | 0.43340756862046      | 0.271 | 0.205 |
| 1.24887173881868e-25 | 6 GNL3 Activated      |       |       |
| 8.27748018740551e-30 | -0.353225107351113    | 0.303 | 0.46  |
| 1.47579194261253e-25 | 6 PTPRC Activated     |       |       |
| 8.43554903789935e-30 | -0.537147074700788    | 0.549 | 0.66  |
| 1.50397403796707e-25 | 6 TCL1A Activated     |       |       |
| 1.22430471716116e-29 | 0.349772104975606     | 0.122 | 0.065 |
| 2.18281288022664e-25 | 6 PIKFYVE Activated   |       |       |
| 1.58081781878138e-29 | 0.3697259687926       | 0.159 | 0.093 |
| 2.81844008910532e-25 | 6 STAT5A Activated    |       |       |
| 1.76874989252801e-29 | 0.466474143909574     | 0.242 | 0.167 |
| 3.15350418338819e-25 | 6 PARP14 Activated    |       |       |
| 2.16995898606344e-29 | 0.455825933793145     | 0.438 | 0.378 |
| 3.86881987625251e-25 | 6 ANXA7 Activated     |       |       |
| 2.36360622509436e-29 | -0.312650153185008    | 0.152 | 0.292 |
| 4.21407353872073e-25 | 6 GSTK1 Activated     |       |       |
| 3.25368035007823e-29 | 0.333024244413288     | 0.109 | 0.057 |
| 5.80098669615447e-25 | 6 DUSP10 Activated    |       |       |
| 3.31971555237333e-29 | 0.397904063696388     | 0.151 | 0.094 |
| 5.91872085832641e-25 | 6 ATF7IP Activated    |       |       |
| 3.69169628339827e-29 | 0.44582650025537      | 0.247 | 0.186 |
| 6.58192530367078e-25 | 6 YARS Activated      |       |       |
| 3.70294969073886e-29 | -0.336003429939006    | 0.191 | 0.336 |
| 6.60198900361831e-25 | 6 TSP0 Activated      |       |       |
| 4.58952368293923e-29 | -0.404929835461379    | 0.138 | 0.253 |
| 8.18266177431236e-25 | 6 TNFRSF13B Activated |       |       |
| 5.57852226177351e-29 | -0.78862281536234     | 0.381 | 0.493 |
| 9.94594734051599e-25 | 6 LTB Activated       |       |       |
| 6.08642344728577e-29 | 0.467827781495834     | 0.403 | 0.34  |
| 1.08514843641658e-24 | 6 CMTM6 Activated     |       |       |
| 6.80129035776617e-29 | 0.465827595038484     | 0.658 | 0.617 |
| 1.21260205788613e-24 | 6 CLEC2D Activated    |       |       |
| 1.0135743869534e-28  | 0.427125535563461     | 0.679 | 0.633 |
| 1.80710177449921e-24 | 6 GPX4 Activated      |       |       |
| 2.06225593235037e-28 | -0.303145658090845    | 0.044 | 0.135 |
| 3.67679610178747e-24 | 6 PHGDH Activated     |       |       |
| 2.34247741209796e-28 | -0.323486393829023    | 0.133 | 0.266 |
| 4.17640297802946e-24 | 6 CCDC69 Activated    |       |       |
| 2.54850910361193e-28 | -0.334872249534709    | 0.119 | 0.244 |
| 4.54373688082971e-24 | 6 NCF4 Activated      |       |       |
| 8.01134872277577e-28 | 0.314086133076783     | 0.105 | 0.062 |
| 1.42834336378369e-23 | 6 IL21R Activated     |       |       |



|                      |                      |       |       |
|----------------------|----------------------|-------|-------|
| 1.53242681935557e-27 | 0.493975998589817    | 0.3   | 0.216 |
| 2.73216377622904e-23 | 6 GBP2 Activated     |       |       |
| 2.42690008629784e-27 | 0.418652249856825    | 0.222 | 0.163 |
| 4.32692016386041e-23 | 6 NXT1 Activated     |       |       |
| 3.35743429928542e-27 | -0.358876401497235   | 0.16  | 0.284 |
| 5.98596961219598e-23 | 6 RNASET2 Activated  |       |       |
| 4.66442604673877e-27 | -0.341267844723228   | 0.168 | 0.303 |
| 8.31620519873056e-23 | 6 GGA2 Activated     |       |       |
| 4.68869865025086e-27 | 0.51616202222134     | 0.471 | 0.426 |
| 8.35948082353225e-23 | 6 PPP1R15A Activated |       |       |
| 7.41423710981866e-27 | -0.845650517083559   | 0.1   | 0.216 |
| 1.32188433430957e-22 | 6 PLCG2 Activated    |       |       |
| 1.21816443439158e-26 | -0.321181882488889   | 0.083 | 0.192 |
| 2.17186537007675e-22 | 6 HLA-D0B Activated  |       |       |
| 1.71656912747513e-26 | 0.330455813346389    | 0.14  | 0.085 |
| 3.06047109737541e-22 | 6 POLR1C Activated   |       |       |
| 2.54525654295749e-26 | 0.448398916665417    | 0.287 | 0.234 |
| 4.53793789043892e-22 | 6 NIFK Activated     |       |       |
| 3.25507749987134e-26 | 0.43657653144228     | 0.312 | 0.249 |
| 5.8034776745206e-22  | 6 NFE2L2 Activated   |       |       |
| 3.87169307294092e-26 | 0.37086448220644     | 0.166 | 0.104 |
| 6.90284157974636e-22 | 6 ARID5A Activated   |       |       |
| 9.17644159325527e-26 | 0.411059711341901    | 0.215 | 0.15  |
| 1.63606777166148e-21 | 6 CEBPB Activated    |       |       |
| 1.00682841553343e-25 | 0.402352710834254    | 0.225 | 0.166 |
| 1.79507438205456e-21 | 6 TNIP2 Activated    |       |       |
| 1.80237710890546e-25 | -0.349690744269883   | 0.178 | 0.302 |
| 3.21345814746754e-21 | 6 PDLIM1 Activated   |       |       |
| 2.22311229966213e-25 | -0.33183230587554    | 0.192 | 0.329 |
| 3.96358691906762e-21 | 6 AES Activated      |       |       |
| 2.60334871569553e-25 | 0.37737921908681     | 0.209 | 0.147 |
| 4.64151042521356e-21 | 6 RPF2 Activated     |       |       |
| 3.37550697393666e-25 | 0.449227729149068    | 0.35  | 0.299 |
| 6.01819138383167e-21 | 6 NOP58 Activated    |       |       |
| 3.70430141560264e-25 | -0.332620460719325   | 0.142 | 0.264 |
| 6.60439899387795e-21 | 6 SYNE2 Activated    |       |       |
| 4.46549262617907e-25 | 0.386406167235494    | 0.201 | 0.137 |
| 7.96152680321467e-21 | 6 RAB29 Activated    |       |       |
| 6.89698968977986e-25 | -0.32048170477513    | 0.111 | 0.223 |
| 1.22966429179085e-20 | 6 NANS Activated     |       |       |
| 9.09068119541996e-25 | 0.311294269160839    | 0.132 | 0.08  |
| 1.62077755033142e-20 | 6 SNX11 Activated    |       |       |
| 1.20487493555481e-24 | 0.383437783699223    | 0.211 | 0.151 |
| 2.14817152260068e-20 | 6 RRP15 Activated    |       |       |
| 1.24013230280653e-24 | -0.313520150446857   | 0.19  | 0.318 |
| 2.21103188267376e-20 | 6 PSIP1 Activated    |       |       |
| 2.16759976624903e-24 | 0.454999722929657    | 0.271 | 0.217 |
| 3.8646136232454e-20  | 6 CCDC50 Activated   |       |       |
| 3.65123607931276e-24 | -0.380364138060014   | 0.235 | 0.365 |
| 6.50978880580672e-20 | 6 H2AFV Activated    |       |       |

|                      |                       |       |       |
|----------------------|-----------------------|-------|-------|
| 4.21648343639458e-24 | 0.374423275553546     | 0.206 | 0.149 |
| 7.5175683187479e-20  | 6 PPAN Activated      |       |       |
| 4.57054730748386e-24 | 0.37069136516353      | 0.176 | 0.121 |
| 8.14882879451298e-20 | 6 PLEK Activated      |       |       |
| 5.38746534730832e-24 | -0.399722979457103    | 0.089 | 0.19  |
| 9.60531196771601e-20 | 6 RGS2 Activated      |       |       |
| 7.1067955962612e-24  | -0.319824505002611    | 0.192 | 0.327 |
| 1.26707058685741e-19 | 6 TNFRSF13C Activated |       |       |
| 9.61014430230472e-24 | 0.466615213891906     | 0.433 | 0.39  |
| 1.71339262765791e-19 | 6 FNBP1 Activated     |       |       |
| 1.18572994240197e-23 | 0.423398745514195     | 0.391 | 0.345 |
| 2.11403791430847e-19 | 6 RBM17 Activated     |       |       |
| 1.55326058320706e-23 | -0.328460522473275    | 0.17  | 0.289 |
| 2.76930829379987e-19 | 6 GNG7 Activated      |       |       |
| 1.63354063308639e-23 | -0.35280514078745     | 0.108 | 0.211 |
| 2.91243959472972e-19 | 6 C16orf74 Activated  |       |       |
| 1.9766845975593e-23  | 0.42121525576295      | 0.34  | 0.276 |
| 3.52423096898848e-19 | 6 WARS Activated      |       |       |
| 2.53724766796608e-23 | -0.317915739439244    | 0.083 | 0.178 |
| 4.52365886721673e-19 | 6 MARCH1 Activated    |       |       |
| 4.79243825719033e-23 | 0.395701323135229     | 0.417 | 0.359 |
| 8.54443816874463e-19 | 6 HSPA9 Activated     |       |       |
| 5.86706025794451e-23 | 0.330449962639942     | 0.576 | 0.509 |
| 1.04603817338893e-18 | 6 PA2G4 Activated     |       |       |
| 8.0134427176118e-23  | 0.371796754876638     | 0.318 | 0.253 |
| 1.42871670212301e-18 | 6 NARS Activated      |       |       |
| 8.7467539916632e-23  | 0.393192476709911     | 0.634 | 0.592 |
| 1.55945876917363e-18 | 6 HNRNPU Activated    |       |       |
| 8.90388368243991e-23 | 0.388518237178024     | 0.23  | 0.176 |
| 1.58747342174221e-18 | 6 ABCE1 Activated     |       |       |
| 1.41990970474427e-22 | 0.446789381943547     | 0.299 | 0.239 |
| 2.53155701258857e-18 | 6 PHACTR1 Activated   |       |       |
| 1.52497024560896e-22 | 0.408646653131032     | 0.291 | 0.238 |
| 2.71886945089621e-18 | 6 SLC38A1 Activated   |       |       |
| 2.10438259338909e-22 | 0.369510766082662     | 0.209 | 0.154 |
| 3.75190372575342e-18 | 6 NOLC1 Activated     |       |       |
| 2.19344163194265e-22 | 0.534715672649338     | 0.201 | 0.167 |
| 3.91068708559056e-18 | 6 CREM Activated      |       |       |
| 2.65627007696956e-22 | 0.35886948957721      | 0.724 | 0.701 |
| 4.73586392022903e-18 | 6 SON Activated       |       |       |
| 4.33750877374992e-22 | 0.342349281366772     | 0.176 | 0.127 |
| 7.73334439271873e-18 | 6 GRWD1 Activated     |       |       |
| 4.84904447213869e-22 | 0.407271414315433     | 0.277 | 0.226 |
| 8.64536138937606e-18 | 6 SINHCAF Activated   |       |       |
| 8.35758868103891e-22 | 0.402844313828152     | 0.247 | 0.192 |
| 1.49007448594243e-17 | 6 ESF1 Activated      |       |       |
| 1.0639472586953e-21  | 0.376394932589148     | 0.321 | 0.265 |
| 1.89691156752786e-17 | 6 CEBPZ Activated     |       |       |
| 1.16151255836466e-21 | 0.534019826393496     | 0.241 | 0.191 |
| 2.07086074030835e-17 | 6 HSPB1 Activated     |       |       |

|                      |                      |       |       |
|----------------------|----------------------|-------|-------|
| 1.1622733368159e-21  | 0.330962288553732    | 0.153 | 0.107 |
| 2.07221713220907e-17 | 6 GALNT2 Activated   |       |       |
| 2.45479327299733e-21 | 0.346283973406075    | 0.204 | 0.154 |
| 4.37665092642694e-17 | 6 GAR1 Activated     |       |       |
| 2.53555561827357e-21 | 0.339653851027447    | 0.162 | 0.111 |
| 4.52064211181994e-17 | 6 NOC3L Activated    |       |       |
| 2.91353889473371e-21 | 0.337768947829517    | 0.146 | 0.105 |
| 5.19454849542073e-17 | 6 MAT2A Activated    |       |       |
| 3.42370934268407e-21 | 0.369812795976696    | 0.612 | 0.569 |
| 6.10413138707143e-17 | 6 RBM8A Activated    |       |       |
| 3.48171952066351e-21 | 0.341989053371314    | 0.175 | 0.127 |
| 6.20755773339098e-17 | 6 CEBPG Activated    |       |       |
| 3.51853249567203e-21 | -0.316783262736646   | 0.439 | 0.557 |
| 6.27319158653366e-17 | 6 TCEA1 Activated    |       |       |
| 4.44696450438564e-21 | -1.22675945016618    | 0.316 | 0.427 |
| 7.92849301486916e-17 | 6 HIST1H4C Activated |       |       |
| 6.27620333983462e-21 | 0.333383381096831    | 0.137 | 0.095 |
| 1.11898429345911e-16 | 6 FCRL3 Activated    |       |       |
| 7.59039304009826e-21 | -0.311868804027526   | 0.102 | 0.197 |
| 1.35329117511912e-16 | 6 DNMT1 Activated    |       |       |
| 8.95358118124607e-21 | 0.326821130582001    | 0.158 | 0.108 |
| 1.59633398880436e-16 | 6 SRFBP1 Activated   |       |       |
| 1.10566774397805e-20 | 0.372691553772717    | 0.366 | 0.303 |
| 1.97129502073847e-16 | 6 ARHGAP24 Activated |       |       |
| 1.23646349197872e-20 | 0.339856924085489    | 0.215 | 0.161 |
| 2.20449075984886e-16 | 6 MRT04 Activated    |       |       |
| 1.25085842455912e-20 | 0.372947702077189    | 0.462 | 0.418 |
| 2.23015548514645e-16 | 6 EIF6 Activated     |       |       |
| 1.36270117992874e-20 | 0.368209087284048    | 0.507 | 0.461 |
| 2.42955993369496e-16 | 6 PRMT1 Activated    |       |       |
| 1.84256827411071e-20 | 0.37873741675473     | 0.284 | 0.233 |
| 3.28511497591198e-16 | 6 EIF4A1 Activated   |       |       |
| 2.14763181221959e-20 | 0.31973050355795     | 0.109 | 0.064 |
| 3.82901275800631e-16 | 6 CD86 Activated     |       |       |
| 2.33647788462017e-20 | 0.375518913711324    | 0.248 | 0.187 |
| 4.16570642048931e-16 | 6 IFNGR1 Activated   |       |       |
| 6.70323136200626e-20 | 0.359144971003648    | 0.503 | 0.453 |
| 1.1951191195321e-15  | 6 DDX18 Activated    |       |       |
| 8.19789491557677e-20 | -0.975772069364461   | 0.083 | 0.15  |
| 1.46160268449818e-15 | 6 IGHA1 Activated    |       |       |
| 8.53554898511984e-20 | 0.376669991144392    | 0.284 | 0.24  |
| 1.52180302855702e-15 | 6 ABCF1 Activated    |       |       |
| 1.30138517271192e-19 | 0.349965808251215    | 0.2   | 0.155 |
| 2.32023962442808e-15 | 6 NAMPT Activated    |       |       |
| 1.93247539091401e-19 | 0.336897924784441    | 0.169 | 0.129 |
| 3.4454103744606e-15  | 6 SRPRB Activated    |       |       |
| 2.39581365384402e-19 | -0.381723105316619   | 0.808 | 0.853 |
| 4.2714961634385e-15  | 6 ATP5MG Activated   |       |       |
| 3.04020097589685e-19 | 0.360943981700163    | 0.278 | 0.234 |
| 5.42037431992649e-15 | 6 EIF2S1 Activated   |       |       |

|                      |                       |       |       |
|----------------------|-----------------------|-------|-------|
| 4.38652464602445e-19 | 0.376695383037929     | 0.19  | 0.143 |
| 7.82073479139699e-15 | 6 SERPINB9 Activated  |       |       |
| 4.65786050577683e-19 | -0.50459677159436     | 0.384 | 0.468 |
| 8.30449949574951e-15 | 6 S100A6 Activated    |       |       |
| 4.8234997463141e-19  | 0.369647518276327     | 0.3   | 0.248 |
| 8.59981769770341e-15 | 6 GARS Activated      |       |       |
| 4.89825098370878e-19 | 0.416512008179695     | 0.411 | 0.374 |
| 8.73309167885438e-15 | 6 TAF1D Activated     |       |       |
| 5.15769788156334e-19 | 0.337280901850916     | 0.683 | 0.652 |
| 9.19565955303927e-15 | 6 TMBIM6 Activated    |       |       |
| 6.09494510427783e-19 | 0.303318533163379     | 0.142 | 0.102 |
| 1.08666776264169e-14 | 6 RIOK1 Activated     |       |       |
| 7.5410364929192e-19  | -2.13698827542228     | 0.061 | 0.129 |
| 1.34449139632256e-14 | 6 IGHG2 Activated     |       |       |
| 8.58408713854764e-19 | 0.337516237127957     | 0.251 | 0.205 |
| 1.53045689593166e-14 | 6 BRIX1 Activated     |       |       |
| 2.18948251337876e-18 | 0.355697920795094     | 0.366 | 0.294 |
| 3.903628373103e-14   | 6 LINC00926 Activated |       |       |
| 2.41424652451607e-18 | 0.34490899443101      | 0.636 | 0.609 |
| 4.30436012855969e-14 | 6 RSL24D1 Activated   |       |       |
| 2.5950035350401e-18  | -0.306887571463121    | 0.118 | 0.209 |
| 4.62663180262299e-14 | 6 PRKCB Activated     |       |       |
| 2.73236789539562e-18 | 0.362977023313343     | 0.198 | 0.152 |
| 4.87153872070086e-14 | 6 RILPL2 Activated    |       |       |
| 3.88523327020103e-18 | 0.370320766339839     | 0.506 | 0.466 |
| 6.92698239744142e-14 | 6 CYCS Activated      |       |       |
| 4.87603742873987e-18 | 0.303218984914999     | 0.199 | 0.151 |
| 8.69348713170031e-14 | 6 NDUFAF4 Activated   |       |       |
| 6.08673662456055e-18 | -0.373925893442242    | 0.132 | 0.215 |
| 1.0852042727929e-13  | 6 PLAC8 Activated     |       |       |
| 8.26344107552507e-18 | 0.378273585003891     | 0.325 | 0.287 |
| 1.47328890935537e-13 | 6 RRAS2 Activated     |       |       |
| 8.69465398104929e-18 | 0.362909385387318     | 0.292 | 0.251 |
| 1.55016985828128e-13 | 6 SLC50A1 Activated   |       |       |
| 1.82988573321799e-17 | -0.300765191953002    | 0.224 | 0.336 |
| 3.26250327375436e-13 | 6 RIPOR2 Activated    |       |       |
| 2.80786182965929e-17 | 0.376132003404917     | 0.201 | 0.172 |
| 5.00613685609955e-13 | 6 SNX8 Activated      |       |       |
| 3.24579695349274e-17 | 0.343166232702957     | 0.236 | 0.194 |
| 5.78693138838221e-13 | 6 GTPBP4 Activated    |       |       |
| 4.7451162569449e-17  | 0.332860938023819     | 0.323 | 0.287 |
| 8.46006777450706e-13 | 6 MRPL14 Activated    |       |       |
| 6.49887310477365e-17 | 0.416861601736908     | 0.422 | 0.396 |
| 1.15868408585009e-12 | 6 ATF4 Activated      |       |       |
| 9.35990736400033e-17 | 0.464835790067097     | 0.658 | 0.653 |
| 1.66877788392762e-12 | 6 HLA-DQA1 Activated  |       |       |
| 1.14900022162816e-16 | 0.347124557287168     | 0.433 | 0.378 |
| 2.04855249514084e-12 | 6 PDCD4 Activated     |       |       |
| 1.21000303217447e-16 | 0.310622718656927     | 0.177 | 0.135 |
| 2.15731440606387e-12 | 6 IFRD2 Activated     |       |       |

|                      |                      |       |       |
|----------------------|----------------------|-------|-------|
| 1.22200854350006e-16 | 0.355653925145261    | 0.231 | 0.191 |
| 2.17871903220627e-12 | 6 WDR74 Activated    |       |       |
| 1.45137217106669e-16 | -0.311139045970643   | 0.152 | 0.245 |
| 2.5876514437948e-12  | 6 RGS1 Activated     |       |       |
| 3.03319819365445e-16 | 0.328613868182478    | 0.561 | 0.528 |
| 5.40788905946652e-12 | 6 SRSF7 Activated    |       |       |
| 3.25349049333235e-16 | 0.375100559012244    | 0.343 | 0.312 |
| 5.80064820056224e-12 | 6 ATP2B1 Activated   |       |       |
| 4.47402129968393e-16 | 0.36017336696919     | 0.461 | 0.437 |
| 7.97673257520648e-12 | 6 DAD1 Activated     |       |       |
| 6.96072538930793e-16 | 0.346441905864629    | 0.241 | 0.209 |
| 1.24102772965971e-11 | 6 ARPP19 Activated   |       |       |
| 7.57709931717682e-16 | 0.339982327956064    | 0.454 | 0.421 |
| 1.35092103725946e-11 | 6 GPBP1 Activated    |       |       |
| 7.9027646691886e-16  | 0.34570979217999     | 0.234 | 0.194 |
| 1.40898391286964e-11 | 6 AARS Activated     |       |       |
| 8.53659062007316e-16 | 0.358767818799501    | 0.283 | 0.24  |
| 1.52198874165284e-11 | 6 HLA-F Activated    |       |       |
| 9.6249479890245e-16  | 0.435953869080906    | 0.47  | 0.444 |
| 1.71603197696318e-11 | 6 KLF6 Activated     |       |       |
| 1.33527382471482e-15 | 0.317894965975206    | 0.438 | 0.396 |
| 2.38065970208405e-11 | 6 BASP1 Activated    |       |       |
| 1.57108602526788e-15 | 0.354658583887532    | 0.438 | 0.415 |
| 2.8010892744501e-11  | 6 PRRC2C Activated   |       |       |
| 1.96517263815325e-15 | 0.337221898346224    | 0.326 | 0.266 |
| 3.50370629656342e-11 | 6 JUN Activated      |       |       |
| 2.00808475635903e-15 | 0.337424035240653    | 0.451 | 0.421 |
| 3.58021431211251e-11 | 6 TMEM123 Activated  |       |       |
| 2.29408681001226e-15 | -0.646716638738252   | 0.35  | 0.431 |
| 4.09012737357087e-11 | 6 STMN1 Activated    |       |       |
| 2.47881939708122e-15 | 0.320780569868596    | 0.485 | 0.448 |
| 4.41948710305611e-11 | 6 ILF2 Activated     |       |       |
| 2.5594574300093e-15  | 0.314733380531381    | 0.624 | 0.593 |
| 4.56325665196358e-11 | 6 SRSF2 Activated    |       |       |
| 2.62677135205441e-15 | 0.32209440912689     | 0.208 | 0.171 |
| 4.68327064357781e-11 | 6 TIMM44 Activated   |       |       |
| 3.03322514880898e-15 | 0.317941002936463    | 0.66  | 0.634 |
| 5.40793711781153e-11 | 6 HERPUD1 Activated  |       |       |
| 2.4215980222412e-14  | 0.371376957062317    | 0.37  | 0.351 |
| 4.31746711385384e-10 | 6 CHMP4B Activated   |       |       |
| 4.05136772377928e-14 | -0.367695640408295   | 0.507 | 0.592 |
| 7.22318351472607e-10 | 6 MARCKSL1 Activated |       |       |
| 5.63448282864587e-14 | 0.312898922208239    | 0.373 | 0.327 |
| 1.00457194351927e-09 | 6 TRBC2 Activated    |       |       |
| 6.01900292002249e-14 | 0.340510901801426    | 0.405 | 0.373 |
| 1.07312803061081e-09 | 6 LCP1 Activated     |       |       |
| 6.55542472179746e-14 | 0.311945744373178    | 0.182 | 0.146 |
| 1.16876667364927e-09 | 6 SVIP Activated     |       |       |
| 6.84695566823772e-14 | 0.305912326741708    | 0.49  | 0.459 |
| 1.2207437260901e-09  | 6 SWAP70 Activated   |       |       |

|                      |                        |       |       |
|----------------------|------------------------|-------|-------|
| 6.90329821696101e-14 | 0.300822487299883      | 0.184 | 0.157 |
| 1.23078903910198e-09 | 6 TRIAP1 Activated     |       |       |
| 8.05540091019695e-14 | 0.367185807838544      | 0.492 | 0.471 |
| 1.43619742827902e-09 | 6 SNHG8 Activated      |       |       |
| 1.58180686854907e-13 | 0.32379298567783       | 0.469 | 0.442 |
| 2.82020346593614e-09 | 6 CD164 Activated      |       |       |
| 1.71658426062627e-13 | 0.302512516061959      | 0.588 | 0.558 |
| 3.06049807827058e-09 | 6 NCL Activated        |       |       |
| 1.79336042511546e-13 | -0.379592509733538     | 0.717 | 0.77  |
| 3.19738230193835e-09 | 6 HMGN1 Activated      |       |       |
| 2.21139894019024e-13 | 0.307914388312543      | 0.326 | 0.299 |
| 3.94270317046518e-09 | 6 POLE4 Activated      |       |       |
| 2.63428288289127e-13 | -0.577987622010854     | 0.145 | 0.208 |
| 4.69666295190685e-09 | 6 LGALS1 Activated     |       |       |
| 2.90323246596635e-13 | 0.348272067560063      | 0.361 | 0.346 |
| 5.17617316357141e-09 | 6 UBE2A Activated      |       |       |
| 4.07356889709889e-13 | 0.307821884375853      | 0.231 | 0.203 |
| 7.2627659866376e-09  | 6 NIPA2 Activated      |       |       |
| 5.28788685047244e-13 | 0.309479927326624      | 0.276 | 0.244 |
| 9.42777346570732e-09 | 6 LAMP1 Activated      |       |       |
| 7.67501290514985e-13 | 0.360914401470245      | 0.298 | 0.276 |
| 1.36837805085917e-08 | 6 TANK Activated       |       |       |
| 8.0782860907613e-13  | -0.313053249867196     | 0.25  | 0.339 |
| 1.44027762712183e-08 | 6 DUT Activated        |       |       |
| 8.70709494900189e-13 | 0.33869442580435       | 0.443 | 0.426 |
| 1.55238795845755e-08 | 6 RNPS1 Activated      |       |       |
| 9.33089350680245e-13 | 0.307331617757018      | 0.479 | 0.459 |
| 1.66360500332781e-08 | 6 GADD45GIP1 Activated |       |       |
| 1.10936378554628e-12 | 0.30245795329324       | 0.203 | 0.178 |
| 1.97788469325046e-08 | 6 SDF4 Activated       |       |       |
| 1.57295872244535e-12 | -0.621495659192622     | 0.669 | 0.718 |
| 2.80442810624782e-08 | 6 HMGN2 Activated      |       |       |
| 1.99062459800206e-12 | 0.321240873942172      | 0.423 | 0.4   |
| 3.54908459577788e-08 | 6 RPL22L1 Activated    |       |       |
| 3.43619792883442e-12 | 0.337732438520417      | 0.307 | 0.29  |
| 6.12639728731889e-08 | 6 G3BP1 Activated      |       |       |
| 7.97554508446785e-12 | 0.342368177964232      | 0.347 | 0.33  |
| 1.42195993310977e-07 | 6 GRHPR Activated      |       |       |
| 1.08185455886732e-11 | 0.343815796659444      | 0.249 | 0.233 |
| 1.92883849300455e-07 | 6 RALA Activated       |       |       |
| 1.65976138185506e-11 | 0.303082019344867      | 0.23  | 0.209 |
| 2.95918856770938e-07 | 6 STX5 Activated       |       |       |
| 1.86162506960605e-11 | 0.308708813719363      | 0.248 | 0.228 |
| 3.31909133660062e-07 | 6 NOB1 Activated       |       |       |
| 2.69526630626238e-11 | 0.358902883099559      | 0.297 | 0.276 |
| 4.80539029743519e-07 | 6 GADD45B Activated    |       |       |
| 4.28312448055213e-11 | 0.337167027486024      | 0.375 | 0.368 |
| 7.63638263637639e-07 | 6 PFDN2 Activated      |       |       |
| 6.02038350427957e-11 | -0.326092485418535     | 0.323 | 0.407 |
| 1.073374174978e-06   | 6 FABP5 Activated      |       |       |

|                      |                   |         |           |       |   |           |
|----------------------|-------------------|---------|-----------|-------|---|-----------|
| 9.80105735550887e-11 | 0.30035667192414  | 0.51    | 0.491     |       |   |           |
| 1.74743051591368e-06 | 6                 | ANKRD12 | Activated |       |   |           |
| 1.02346386938299e-10 | 0.300014241095577 |         | 0.483     | 0.475 |   |           |
| 1.82473373272294e-06 | 6                 | VAPA    | Activated |       |   |           |
| 1.29451075238751e-10 | 0.30118454633149  | 0.351   | 0.334     |       |   |           |
| 2.3079832204317e-06  | 6                 | VOPP1   | Activated |       |   |           |
| 1.3068608204629e-10  | 0.301366965185489 |         | 0.379     | 0.363 |   |           |
| 2.3300021568033e-06  | 6                 | EIF3J   | Activated |       |   |           |
| 5.439855759893e-10   | 0.302408158601825 |         | 0.341     | 0.333 |   |           |
| 9.69871883431323e-06 | 6                 | DARS    | Activated |       |   |           |
| 1.55336435053288e-09 | 0.326903296126167 |         | 0.364     | 0.346 |   |           |
| 2.76949330056508e-05 | 6                 | BIRC3   | Activated |       |   |           |
| 1.62339557528491e-09 | 0.301093823587456 |         | 0.256     | 0.239 |   |           |
| 2.89435197117546e-05 | 6                 | ANKRD11 | Activated |       |   |           |
| 2.13670316112591e-09 | 0.351522490988719 |         | 0.179     | 0.168 |   |           |
| 3.80952806597139e-05 | 6                 | SAMSN1  | Activated |       |   |           |
| 2.28933652625988e-09 | 0.329180786905498 |         | 0.849     | 0.866 |   |           |
| 4.08165809266874e-05 | 6                 | UBC     | Activated |       |   |           |
| 2.59371796033208e-09 | 0.521100853464525 |         | 0.614     | 0.649 |   |           |
| 4.62433975147607e-05 | 6                 | ZFAS1   | Activated |       |   |           |
| 2.79977320213303e-09 | 0.304197520022841 |         | 0.43      | 0.424 |   |           |
| 4.99171564208298e-05 | 6                 | STK4    | Activated |       |   |           |
| 5.00621935230883e-09 | 0.301935923940106 |         | 0.452     | 0.45  |   |           |
| 8.92558848323141e-05 | 6                 | EIF5    | Activated |       |   |           |
| 3.74810238818829e-07 | -1.67852998314754 |         | 0.198     | 0.245 |   |           |
| 0.00668249174790091  | 6                 | IGHG4   | Activated |       |   |           |
| 0.00302584672651886  | -0.55255428677803 |         | 0.914     | 0.927 | 1 |           |
|                      | 6                 | IGKC    | Activated |       |   |           |
| 0                    | 2.26635411586193  | 0.964   | 0.47      | 0     | 7 | LTB GC    |
| 0                    | 1.86778556539439  | 0.596   | 0.057     | 0     | 7 | SUGCT GC  |
| 0                    | 1.86254580185668  | 0.74    | 0.11      | 0     | 7 | NEIL1 GC  |
| 0                    | 1.58801281568944  | 0.693   | 0.14      | 0     | 7 | SUSD3 GC  |
| 0                    | 1.55948049178023  | 0.984   | 0.642     | 0     | 7 | TCL1A GC  |
| 0                    | 1.52933239525062  | 0.811   | 0.182     | 0     | 7 | RGS13 GC  |
| 0                    | 1.50535371612632  | 0.998   | 0.931     | 0     | 7 | SERF2 GC  |
| 0                    | 1.49287315204014  | 0.995   | 0.846     | 0     | 7 | ATP5MG GC |
| 0                    | 1.47873167937677  | 0.639   | 0.173     | 0     | 7 | DAAM1 GC  |
| 0                    | 1.46367297739174  | 0.759   | 0.214     | 0     | 7 | UBE2J1 GC |
| 0                    | 1.44750754333442  | 0.934   | 0.518     | 0     | 7 | ISG20 GC  |
| 0                    | 1.44621423184704  | 0.537   | 0.066     | 0     | 7 | AICDA GC  |
| 0                    | 1.44462988064429  | 0.58    | 0.087     | 0     | 7 | HRK GC    |
| 0                    | 1.43175711510476  | 0.814   | 0.283     | 0     | 7 | CD27 GC   |
| 0                    | 1.40296123735752  | 0.978   | 0.715     | 0     | 7 | LIMD2 GC  |
| 0                    | 1.38260111104397  | 0.433   | 0.07      | 0     | 7 | SH3TC1 GC |
| 0                    | 1.35514995958237  | 0.969   | 0.683     | 0     | 7 | EZR GC    |
| 0                    | 1.30162438075945  | 0.49    | 0.106     | 0     | 7 | LPP GC    |
| 0                    | 1.29933104731061  | 0.987   | 0.851     | 0     | 7 | CD79B GC  |
| 0                    | 1.28149289935136  | 0.495   | 0.079     | 0     | 7 | WDR66 GC  |
| 0                    | 1.26347526909206  | 0.915   | 0.592     | 0     | 7 | DYNLL1 GC |
| 0                    | 1.25669254776155  | 0.98    | 0.778     | 0     | 7 | ACTG1 GC  |

|                       |                   |                   |       |       |       |         |    |
|-----------------------|-------------------|-------------------|-------|-------|-------|---------|----|
| 0                     | 1.2378722954761   | 0.766             | 0.27  | 0     | 7     | BCAS4   | GC |
| 0                     | 1.21798192923729  | 0.85              | 0.478 | 0     | 7     | C4orf3  | GC |
| 0                     | 1.19008127293181  | 0.782             | 0.311 | 0     | 7     | RFTN1   | GC |
| 0                     | 1.18375560252529  | 0.851             | 0.412 | 0     | 7     | IRF8    | GC |
| 0                     | 1.18197886665823  | 0.708             | 0.256 | 0     | 7     | POU2AF1 | GC |
| 0                     | 1.11131323358414  | 0.873             | 0.521 | 0     | 7     | SRSF9   | GC |
| 0                     | 1.08831999823743  | 0.905             | 0.538 | 0     | 7     | TCEA1   | GC |
| 0                     | 1.04200469338051  | 0.993             | 0.884 | 0     | 7     | GAPDH   | GC |
| 0                     | 1.01074609959194  | 0.972             | 0.808 | 0     | 7     | COR01A  | GC |
| 0                     | 1.00185594362717  | 0.922             | 0.382 | 0     | 7     | JCHAIN  | GC |
| 0                     | 0.906336365409336 |                   | 0.976 | 0.793 | 0     | 7       |    |
| LAPTM5                | GC                |                   |       |       |       |         |    |
| 0                     | 0.800890252258652 |                   | 0.999 | 0.989 | 0     | 7       |    |
| ACTB                  | GC                |                   |       |       |       |         |    |
| 0                     | -1.0076578075775  | 0.998             | 0.998 | 0     | 7     | B2M     | GC |
| 0                     | -2.07999214495098 |                   | 0.097 | 0.561 | 0     | 7       |    |
| CCR7                  | GC                |                   |       |       |       |         |    |
| 0                     | -2.28904825275246 |                   | 0.193 | 0.718 | 0     | 7       |    |
| EMP3                  | GC                |                   |       |       |       |         |    |
| 1.88387230759267e-320 |                   | 1.21660901845263  | 0.726 | 0.256 |       |         |    |
| 3.35875593720698e-316 | 7                 | NCF1              | GC    |       |       |         |    |
| 1.30575299771356e-315 |                   | 1.09785696967751  | 0.917 | 0.575 |       |         |    |
| 2.3280270196235e-311  | 7                 | MARCKSL1          | GC    |       |       |         |    |
| 3.96655130918406e-308 |                   | 1.17517946955828  | 0.769 | 0.314 |       |         |    |
| 7.07196432914425e-304 | 7                 | GRHPR             | GC    |       |       |         |    |
| 2.21150890977601e-306 |                   | 1.12444253525267  | 0.474 | 0.097 |       |         |    |
| 3.94289923523965e-302 | 7                 | CPNE5             | GC    |       |       |         |    |
| 5.48125031832227e-305 |                   | 1.10811814734128  | 0.488 | 0.096 |       |         |    |
| 9.77252119253678e-301 | 7                 | AC023590.1        | GC    |       |       |         |    |
| 1.0849877764424e-303  |                   | 1.18424830631733  | 0.561 | 0.153 |       |         |    |
| 1.93442470661915e-299 | 7                 | SEL1L3            | GC    |       |       |         |    |
| 3.01092652454291e-300 |                   | 1.08684896116833  | 0.812 | 0.381 |       |         |    |
| 5.36818090060756e-296 | 7                 | BASP1             | GC    |       |       |         |    |
| 1.28746179417638e-297 |                   | 0.969534803359605 |       | 0.961 | 0.76  |         |    |
| 2.29541563283706e-293 | 7                 | HMG1              | GC    |       |       |         |    |
| 1.32276311311123e-293 |                   | 1.16041600198305  | 0.763 | 0.285 |       |         |    |
| 2.35835435436601e-289 | 7                 | BCL7A             | GC    |       |       |         |    |
| 1.25086211495189e-290 |                   | -1.210520136064   | 0.729 | 0.912 |       |         |    |
| 2.23016206474773e-286 | 7                 | HLA-A             | GC    |       |       |         |    |
| 3.63144834268859e-286 |                   | 1.11283561661313  | 0.787 | 0.359 |       |         |    |
| 6.47450925017949e-282 | 7                 | ACADM             | GC    |       |       |         |    |
| 3.23887763351305e-285 |                   | 0.752134600985913 |       | 0.986 | 0.865 |         |    |
| 5.77459493279041e-281 | 7                 | ARPC2             | GC    |       |       |         |    |
| 1.11224134660338e-281 |                   | 1.09963121560025  | 0.502 | 0.103 |       |         |    |
| 1.98301509685917e-277 | 7                 | CD38              | GC    |       |       |         |    |
| 1.25793161243984e-280 |                   | 1.13190227644734  | 0.626 | 0.19  |       |         |    |
| 2.242766271819e-276   | 7                 | FAF2              | GC    |       |       |         |    |
| 1.38993805413712e-275 |                   | 0.955900454567789 |       | 0.366 | 0.057 |         |    |
| 2.47812055672106e-271 | 7                 | SNTA1             | GC    |       |       |         |    |
| 2.60823150398112e-271 |                   | 0.638051864877064 |       | 0.993 | 0.96  |         |    |



|                       |                    |         |    |       |       |       |
|-----------------------|--------------------|---------|----|-------|-------|-------|
| 4.65021594844794e-267 | 7                  | OAZ1    | GC |       |       |       |
| 8.99293634791177e-270 | 1.11069506684722   |         |    | 0.727 | 0.346 |       |
| 1.60335062146919e-265 | 7                  | TPD52   | GC |       |       |       |
| 1.32927888525225e-269 | 1.03763451570589   |         |    | 0.735 | 0.323 |       |
| 2.36997132451624e-265 | 7                  | STK17A  | GC |       |       |       |
| 5.19719156082254e-269 | 0.736394788726956  |         |    |       | 0.976 | 0.865 |
| 9.26607283379051e-265 | 7                  | ARPC3   | GC |       |       |       |
| 2.24253716373597e-267 | 1.01199633708841   |         |    | 0.342 | 0.062 |       |
| 3.99821950922486e-263 | 7                  | S1PR2   | GC |       |       |       |
| 1.04754664427038e-265 | 1.12786943328139   |         |    | 0.553 | 0.137 |       |
| 1.86767091206965e-261 | 7                  | CD81    | GC |       |       |       |
| 9.53539752998382e-265 | 1.08712825111177   |         |    | 0.647 | 0.243 |       |
| 1.70006602562082e-260 | 7                  | SYNE2   | GC |       |       |       |
| 9.03784685155983e-256 | 1.07915280006557   |         |    | 0.506 | 0.151 |       |
| 1.6113577151646e-251  | 7                  | DEF8    | GC |       |       |       |
| 3.42114936943042e-255 | 0.868323737368597  |         |    |       | 0.322 | 0.046 |
| 6.0995672107575e-251  | 7                  | MME     | GC |       |       |       |
| 9.55045448257203e-255 | 0.975989471354102  |         |    |       | 0.817 | 0.424 |
| 1.70275052969777e-250 | 7                  | RHOH    | GC |       |       |       |
| 1.58781698579361e-244 | 0.977905635266832  |         |    |       | 0.438 | 0.112 |
| 2.83091890397143e-240 | 7                  | DLAT    | GC |       |       |       |
| 8.01129524115397e-243 | 1.0274023098837    |         |    | 0.839 | 0.475 |       |
| 1.42833382854534e-238 | 7                  | UCP2    | GC |       |       |       |
| 4.31927987731837e-241 | 1.02124375549881   |         |    | 0.481 | 0.126 |       |
| 7.70084409327092e-237 | 7                  | SOCS1   | GC |       |       |       |
| 1.17797276567249e-234 | 0.968107172625397  |         |    |       | 0.636 | 0.246 |
| 2.10020764391748e-230 | 7                  | CCDC69  | GC |       |       |       |
| 5.54414015656888e-233 | 0.979980099355435  |         |    |       | 0.458 | 0.128 |
| 9.88464748514666e-229 | 7                  | AIM2    | GC |       |       |       |
| 3.80080253632704e-232 | 0.961040441241142  |         |    |       | 0.492 | 0.133 |
| 6.77645084201748e-228 | 7                  | SEC14L1 | GC |       |       |       |
| 1.26572342180107e-229 | 0.879890940835452  |         |    |       | 0.86  | 0.528 |
| 2.25665828872913e-225 | 7                  | PARP1   | GC |       |       |       |
| 2.01965239243243e-229 | 1.08309007438049   |         |    | 0.585 | 0.187 |       |
| 3.60083825046778e-225 | 7                  | HMCES   | GC |       |       |       |
| 2.55341480835876e-227 | 0.715247452654997  |         |    |       | 0.244 | 0.032 |
| 4.55248326182284e-223 | 7                  | SYBU    | GC |       |       |       |
| 3.10099630636962e-224 | 1.02756355879137   |         |    | 0.745 | 0.404 |       |
| 5.52876631462639e-220 | 7                  | METAP2  | GC |       |       |       |
| 1.37383001051671e-222 | 0.479303422119716  |         |    |       | 0.999 | 0.998 |
| 2.44940152575025e-218 | 7                  | TMSB4X  | GC |       |       |       |
| 4.2212839913711e-221  | 0.919282892665346  |         |    |       | 0.745 | 0.393 |
| 7.52612722821554e-217 | 7                  | LSM10   | GC |       |       |       |
| 2.27191395345346e-215 | 0.944162715052269  |         |    |       | 0.683 | 0.282 |
| 4.05059538761217e-211 | 7                  | GGA2    | GC |       |       |       |
| 3.0591971447004e-215  | 0.974670591528248  |         |    |       | 0.478 | 0.124 |
| 5.45424258928634e-211 | 7                  | SIT1    | GC |       |       |       |
| 1.77703664580189e-214 | -0.969145283249775 |         |    |       | 0.999 | 1     |
| 3.16827863580018e-210 | 7                  | MALAT1  | GC |       |       |       |
| 3.22678045848319e-213 | 0.908552050704889  |         |    |       | 0.385 | 0.091 |

|                       |                    |         |    |       |       |
|-----------------------|--------------------|---------|----|-------|-------|
| 5.75302687942969e-209 | 7                  | SEMA4A  | GC |       |       |
| 4.31884986033168e-211 | 0.7744444556968282 |         |    | 0.916 | 0.647 |
| 7.70007741598535e-207 | 7                  | SLC25A5 | GC |       |       |
| 8.29421002046727e-208 | 0.789892242774041  |         |    | 0.323 | 0.06  |
| 1.47877470454911e-203 | 7                  | ST14    | GC |       |       |
| 1.54626426098935e-205 | 0.909832868947679  |         |    | 0.445 | 0.108 |
| 2.75683455091791e-201 | 7                  | VNN2    | GC |       |       |
| 1.31722323212022e-204 | 0.586064748607164  |         |    | 0.99  | 0.916 |
| 2.34847730054713e-200 | 7                  | CFL1    | GC |       |       |
| 5.05740752636572e-199 | 0.878156653383388  |         |    | 0.717 | 0.37  |
| 9.01685187875744e-195 | 7                  | SMARCB1 | GC |       |       |
| 2.27960047545622e-198 | 0.981380668386899  |         |    | 0.61  | 0.222 |
| 4.06429968769089e-194 | 7                  | GCHFR   | GC |       |       |
| 2.28650730151376e-195 | 0.780804342136453  |         |    | 0.874 | 0.614 |
| 4.07661386786888e-191 | 7                  | LAMTOR5 | GC |       |       |
| 3.67369664213769e-195 | -1.70689078903251  |         |    | 0.263 | 0.582 |
| 6.5498337432673e-191  | 7                  | VIM     | GC |       |       |
| 9.53640703198199e-193 | 0.928271124126214  |         |    | 0.573 | 0.213 |
| 1.70024600973207e-188 | 7                  | UBE2G1  | GC |       |       |
| 1.92169311881867e-192 | -1.33048797103375  |         |    | 0.066 | 0.362 |
| 3.4261866615418e-188  | 7                  | LY6E    | GC |       |       |
| 4.27590911057823e-192 | 0.769649260020523  |         |    | 0.89  | 0.643 |
| 7.62351835324993e-188 | 7                  | YWHAB   | GC |       |       |
| 3.5341087218947e-191  | 0.903076015391606  |         |    | 0.707 | 0.352 |
| 6.30096244026607e-187 | 7                  | SNAP23  | GC |       |       |
| 6.44002983912425e-191 | 0.600235787925996  |         |    | 0.982 | 0.902 |
| 1.14819292001746e-186 | 7                  | ATP5F1E | GC |       |       |
| 1.30906877232406e-190 | 0.856627726248032  |         |    | 0.453 | 0.145 |
| 2.33393871417656e-186 | 7                  | SMIM20  | GC |       |       |
| 3.31191853359364e-188 | 0.715937156695771  |         |    | 0.24  | 0.03  |
| 5.9048195535441e-184  | 7                  | SLC2A5  | GC |       |       |
| 5.82565850301689e-186 | 0.885008250018826  |         |    | 0.353 | 0.087 |
| 1.03865665450288e-181 | 7                  | STAG3   | GC |       |       |
| 1.2647184069031e-185  | 0.536234025560046  |         |    | 0.982 | 0.936 |
| 2.25486644766754e-181 | 7                  | EEF2    | GC |       |       |
| 7.63465337252034e-184 | 0.753045862175605  |         |    | 0.886 | 0.612 |
| 1.36118234978665e-179 | 7                  | ARPC1B  | GC |       |       |
| 7.71111042065669e-184 | 0.870850152164129  |         |    | 0.595 | 0.218 |
| 1.37481387689888e-179 | 7                  | IL4R    | GC |       |       |
| 1.38924418650878e-183 | 0.818336186095547  |         |    | 0.71  | 0.379 |
| 2.4768834601265e-179  | 7                  | FNBP1   | GC |       |       |
| 1.95901658172419e-183 | -1.88155596902848  |         |    | 0.158 | 0.477 |
| 3.49273066355606e-179 | 7                  | S100A6  | GC |       |       |
| 1.9115762555776e-182  | 0.610775997321094  |         |    | 0.999 | 0.989 |
| 3.4081493060693e-178  | 7                  | CD74    | GC |       |       |
| 4.38377086905527e-182 | 0.868808733872051  |         |    | 0.547 | 0.22  |
| 7.81582508243864e-178 | 7                  | ZNF581  | GC |       |       |
| 2.26467341104919e-179 | 0.888855491769604  |         |    | 0.518 | 0.159 |
| 4.0376862245596e-175  | 7                  | TMEM156 | GC |       |       |
| 2.58191384475947e-179 | 1.06377620975826   | 0.519   |    | 0.173 |       |

|                       |                    |         |    |       |       |
|-----------------------|--------------------|---------|----|-------|-------|
| 4.60329419382166e-175 | 7                  | RGS2    | GC |       |       |
| 8.85521004037797e-178 | 0.850834388281323  |         |    | 0.461 | 0.16  |
| 1.57879539809899e-173 | 7                  | BLOC1S6 | GC |       |       |
| 1.48884946969029e-176 | 0.641125297339014  |         |    | 0.244 | 0.037 |
| 2.65446971951082e-172 | 7                  | ASB2    | GC |       |       |
| 9.02599750410722e-176 | 0.796329207349761  |         |    | 0.483 | 0.17  |
| 1.60924509500728e-171 | 7                  | RASGRP3 | GC |       |       |
| 5.8923785440678e-175  | 1.12195302558514   | 0.783   |    | 0.486 |       |
| 1.05055217062185e-170 | 7                  | SAT1    | GC |       |       |
| 3.39670551593129e-174 | 0.743395100822417  |         |    | 0.279 | 0.053 |
| 6.05598626435389e-170 | 7                  | DCAF12  | GC |       |       |
| 5.63284815641186e-174 | -0.677156616961232 |         |    | 0.998 | 0.999 |
| 1.00428049780667e-169 | 7                  | RPS29   | GC |       |       |
| 1.77187286456509e-172 | 0.520164873381007  |         |    | 0.987 | 0.896 |
| 3.15907213023309e-168 | 7                  | PFN1    | GC |       |       |
| 3.00142527759986e-172 | -0.731851976050875 |         |    | 0.965 | 0.987 |
| 5.35124112743279e-168 | 7                  | HLA-B   | GC |       |       |
| 3.07440957343387e-172 | 0.656769861700971  |         |    | 0.244 | 0.049 |
| 5.48136482847524e-168 | 7                  | BFSP2   | GC |       |       |
| 8.09911642720956e-172 | 0.796646257285213  |         |    | 0.718 | 0.381 |
| 1.44399146780719e-167 | 7                  | YWHAE   | GC |       |       |
| 1.00045609808327e-171 | 0.713178465759676  |         |    | 0.881 | 0.625 |
| 1.78371317727266e-167 | 7                  | BRK1    | GC |       |       |
| 5.69331901960372e-171 | 0.82050172743433   | 0.607   |    | 0.253 |       |
| 1.01506184800515e-166 | 7                  | ALOX5AP | GC |       |       |
| 1.69891730232439e-170 | 0.686338335792603  |         |    | 0.951 | 0.755 |
| 3.02899965831416e-166 | 7                  | CYBA    | GC |       |       |
| 3.9748315310634e-170  | -1.22064192708284  |         |    | 0.309 | 0.587 |
| 7.08672713673293e-166 | 7                  | SARAF   | GC |       |       |
| 6.76601520271629e-169 | 0.707385513077698  |         |    | 0.309 | 0.07  |
| 1.20631285049229e-164 | 7                  | MYO1E   | GC |       |       |
| 4.20431564860304e-166 | 0.918126370287577  |         |    | 0.688 | 0.335 |
| 7.49587436989436e-162 | 7                  | S100A10 | GC |       |       |
| 1.21219574229071e-161 | 0.958836446819723  |         |    | 0.497 | 0.155 |
| 2.16122378893011e-157 | 7                  | CCDC88A | GC |       |       |
| 1.4127462414253e-160  | 0.848328529334552  |         |    | 0.693 | 0.324 |
| 2.51878527383717e-156 | 7                  | SPIB    | GC |       |       |
| 8.33592736925373e-159 | 0.775318985012848  |         |    | 0.83  | 0.503 |
| 1.48621249066425e-154 | 7                  | LSP1    | GC |       |       |
| 2.89067425074489e-158 | 0.827290060529378  |         |    | 0.475 | 0.176 |
| 5.15378312165307e-154 | 7                  | PRPSAP2 | GC |       |       |
| 1.66735616777884e-157 | 0.795102406504327  |         |    | 0.444 | 0.151 |
| 2.97272931153289e-153 | 7                  | LYPLAL1 | GC |       |       |
| 9.52427191725415e-157 | -1.15103720694769  |         |    | 0.379 | 0.63  |
| 1.69808244012724e-152 | 7                  | SUB1    | GC |       |       |
| 1.27964979245481e-155 | -0.750007285628487 |         |    | 0.992 | 0.997 |
| 2.28148761496767e-151 | 7                  | RPS12   | GC |       |       |
| 1.61763631087482e-155 | 0.795405525085196  |         |    | 0.548 | 0.238 |
| 2.88408377865872e-151 | 7                  | SH3KBP1 | GC |       |       |
| 2.1006930426406e-154  | 0.617032782666916  |         |    | 0.231 | 0.044 |

|                       |                    |           |    |       |       |
|-----------------------|--------------------|-----------|----|-------|-------|
| 3.74532562572392e-150 | 7                  | ASB13     | GC |       |       |
| 1.35223235190747e-152 | 0.666396178062789  |           |    | 0.252 | 0.041 |
| 2.41089506021583e-148 | 7                  | LINC01991 | GC |       |       |
| 5.13740800475118e-152 | 0.776543774920862  |           |    | 0.542 | 0.23  |
| 9.15948473167088e-148 | 7                  | NCOA3     | GC |       |       |
| 2.88899742097286e-150 | 0.735727776634422  |           |    | 0.728 | 0.413 |
| 5.15079350185251e-146 | 7                  | CD40      | GC |       |       |
| 2.74882096659048e-149 | 0.850616542184384  |           |    | 0.493 | 0.173 |
| 4.90087290133416e-145 | 7                  | P2RX5     | GC |       |       |
| 8.23915372917832e-149 | 0.626939611213931  |           |    | 0.242 | 0.046 |
| 1.4689587183752e-144  | 7                  | A4GALT    | GC |       |       |
| 1.32136103832418e-148 | 0.731759242003389  |           |    | 0.259 | 0.044 |
| 2.35585459522817e-144 | 7                  | SERPINA9  | GC |       |       |
| 3.03387384112113e-148 | 0.782674104390462  |           |    | 0.684 | 0.362 |
| 5.40909367133486e-144 | 7                  | PTP4A2    | GC |       |       |
| 5.38938066014548e-148 | -1.53573989629633  |           |    | 0.483 | 0.673 |
| 9.60872677897337e-144 | 7                  | TUBA1B    | GC |       |       |
| 3.67130535409096e-147 | 0.79417527658627   | 0.537     |    | 0.238 |       |
| 6.54557031580878e-143 | 7                  | PPP2R5C   | GC |       |       |
| 8.85824052833383e-147 | 0.69655512175072   | 0.802     |    | 0.512 |       |
| 1.57933570379664e-142 | 7                  | FKBP1A    | GC |       |       |
| 1.35013286453238e-146 | 0.660117669108025  |           |    | 0.845 | 0.569 |
| 2.40715188417477e-142 | 7                  | LDHB      | GC |       |       |
| 3.25615012447974e-146 | 0.775692859223671  |           |    | 0.542 | 0.229 |
| 5.80539005693492e-142 | 7                  | RGS1      | GC |       |       |
| 3.37586357078767e-146 | 0.743768898282443  |           |    | 0.733 | 0.389 |
| 6.01882716035733e-142 | 7                  | MBD4      | GC |       |       |
| 8.17106491981819e-146 | -0.834845900622772 |           |    | 0.977 | 0.986 |
| 1.45681916455439e-141 | 7                  | TMSB10    | GC |       |       |
| 1.33121205033554e-145 | 0.749939299981354  |           |    | 0.526 | 0.207 |
| 2.37341796454323e-141 | 7                  | LY86      | GC |       |       |
| 2.51116466323552e-145 | 0.890161945320587  |           |    | 0.506 | 0.199 |
| 4.47715547808261e-141 | 7                  | ADA       | GC |       |       |
| 1.14099861883425e-144 | 0.639263881233109  |           |    | 0.866 | 0.623 |
| 2.03428643751958e-140 | 7                  | EIF3H     | GC |       |       |
| 2.31764055959456e-143 | -1.15849442508024  |           |    | 0.12  | 0.393 |
| 4.13212135370114e-139 | 7                  | CD44      | GC |       |       |
| 6.80800725960007e-142 | -1.26244879780251  |           |    | 0.099 | 0.363 |
| 1.2137996143141e-137  | 7                  | TXNIP     | GC |       |       |
| 5.550902691562e-141   | 0.621407870679714  |           |    | 0.278 | 0.062 |
| 9.89670440878589e-137 | 7                  | MTA3      | GC |       |       |
| 1.16214082897819e-140 | 0.806493615604547  |           |    | 0.554 | 0.252 |
| 2.07198088398522e-136 | 7                  | CD22      | GC |       |       |
| 2.38905039831249e-139 | 0.748772663052149  |           |    | 0.359 | 0.091 |
| 4.25943795515134e-135 | 7                  | MYBL2     | GC |       |       |
| 7.0853167672442e-139  | 0.749603005497663  |           |    | 0.471 | 0.184 |
| 1.26324112643197e-134 | 7                  | USP34     | GC |       |       |
| 4.36336208403031e-138 | 0.769968683279825  |           |    | 0.466 | 0.169 |
| 7.77943825961763e-134 | 7                  | LCK       | GC |       |       |
| 4.81609365155011e-137 | -0.618284218917672 |           |    | 0.779 | 0.911 |

|                       |                    |          |    |       |       |
|-----------------------|--------------------|----------|----|-------|-------|
| 8.5866133713487e-133  | 7                  | IGHM     | GC |       |       |
| 4.11936951016682e-135 | 0.644536838940321  |          |    | 0.743 | 0.425 |
| 7.34442389967643e-131 | 7                  | COTL1    | GC |       |       |
| 2.17470777915762e-134 | 0.412660331492937  |          |    | 0.983 | 0.921 |
| 3.87728649946013e-130 | 7                  | BTF3     | GC |       |       |
| 9.19324874946818e-134 | 0.633913086995242  |          |    | 0.856 | 0.574 |
| 1.63906431954268e-129 | 7                  | ATP5MC3  | GC |       |       |
| 1.27187903900646e-132 | 0.6796879256541    | 0.706    |    | 0.404 |       |
| 2.26763313864461e-128 | 7                  | PPP1CC   | GC |       |       |
| 1.24232582828703e-131 | 0.807897251243008  |          |    | 0.475 | 0.135 |
| 2.21494271925295e-127 | 7                  | BIK      | GC |       |       |
| 2.35350989781072e-131 | 0.599464633103134  |          |    | 0.195 | 0.04  |
| 4.19607279680673e-127 | 7                  | CCDC144A | GC |       |       |
| 5.67488358412624e-131 | 0.680801103654924  |          |    | 0.76  | 0.458 |
| 1.01177499421387e-126 | 7                  | MTDH     | GC |       |       |
| 1.0077968265037e-130  | 0.67191016821987   | 0.742    |    | 0.448 |       |
| 1.79680096197344e-126 | 7                  | RAP1B    | GC |       |       |
| 2.03754918469062e-130 | 0.637088378943618  |          |    | 0.795 | 0.505 |
| 3.63274644138491e-126 | 7                  | SMDT1    | GC |       |       |
| 2.66990783295358e-130 | 0.633193882049322  |          |    | 0.247 | 0.056 |
| 4.76017867537294e-126 | 7                  | PITPNC1  | GC |       |       |
| 7.57222331165831e-130 | 0.718658422445634  |          |    | 0.323 | 0.082 |
| 1.35005169423556e-125 | 7                  | GCSAM    | GC |       |       |
| 4.28400120551917e-128 | 0.683062011953562  |          |    | 0.31  | 0.091 |
| 7.63794574932013e-124 | 7                  | FAM241A  | GC |       |       |
| 6.93134322447901e-128 | 0.655478502354659  |          |    | 0.818 | 0.546 |
| 1.23578918349236e-123 | 7                  | ATP5IF1  | GC |       |       |
| 1.91748487007792e-127 | -0.995952954926405 |          |    | 0.04  | 0.218 |
| 3.41868377486193e-123 | 7                  | PLAC8    | GC |       |       |
| 1.40364319340579e-126 | 0.456462875273802  |          |    | 0.976 | 0.899 |
| 2.50255544952318e-122 | 7                  | MYL6     | GC |       |       |
| 1.64594430460565e-125 | 0.723099009869801  |          |    | 0.554 | 0.273 |
| 2.93455410068141e-121 | 7                  | GNG7     | GC |       |       |
| 1.33119794218586e-124 | 0.685689643286308  |          |    | 0.46  | 0.187 |
| 2.37339281112317e-120 | 7                  | POLD4    | GC |       |       |
| 1.76709638170761e-124 | 0.728881743141129  |          |    | 0.585 | 0.262 |
| 3.15055613894651e-120 | 7                  | ITGAE    | GC |       |       |
| 3.72802751015565e-124 | -0.849074543239589 |          |    | 0.924 | 0.965 |
| 6.64670024785651e-120 | 7                  | FTL      | GC |       |       |
| 2.08272082433766e-123 | 0.689114071424954  |          |    | 0.714 | 0.424 |
| 3.71328295771162e-119 | 7                  | ROM01    | GC |       |       |
| 5.5797487986931e-123  | 0.663302841599192  |          |    | 0.685 | 0.382 |
| 9.94813413318992e-119 | 7                  | SYPL1    | GC |       |       |
| 1.4219075991708e-122  | 0.674561147423987  |          |    | 0.635 | 0.349 |
| 2.53511905856162e-118 | 7                  | TKT      | GC |       |       |
| 4.11797400845735e-122 | 0.732119802456685  |          |    | 0.411 | 0.136 |
| 7.34193585967862e-118 | 7                  | RBM38    | GC |       |       |
| 2.47953120177927e-121 | 0.684241073723627  |          |    | 0.898 | 0.67  |
| 4.42075617965227e-117 | 7                  | HLA-DMA  | GC |       |       |
| 2.86700947507958e-121 | 0.609022502895182  |          |    | 0.796 | 0.512 |

|                       |                    |              |    |       |       |
|-----------------------|--------------------|--------------|----|-------|-------|
| 5.11159119311939e-117 | 7                  | TRAPPC1      | GC |       |       |
| 2.94533889668808e-121 | 0.675029953510667  |              |    | 0.565 | 0.278 |
| 5.25124471890517e-117 | 7                  | RRAS2        | GC |       |       |
| 1.61296390603325e-120 | 0.734559132957132  |              |    | 0.281 | 0.068 |
| 2.87575334806668e-116 | 7                  | RGCC         | GC |       |       |
| 2.0274613822992e-120  | 0.456370655751209  |              |    | 0.145 | 0.016 |
| 3.61476089850125e-116 | 7                  | ANK1         | GC |       |       |
| 4.68644203750732e-120 | 0.450420066991301  |              |    | 0.169 | 0.026 |
| 8.35545750867181e-116 | 7                  | MIR3681HG    | GC |       |       |
| 1.74613488370731e-119 | 0.528690258278373  |              |    | 0.835 | 0.612 |
| 3.11318388416177e-115 | 7                  | ACTR3        | GC |       |       |
| 2.7380165671011e-119  | 0.697001457654945  |              |    | 0.583 | 0.295 |
| 4.88160973748455e-115 | 7                  | TIMM8B       | GC |       |       |
| 2.77386650297365e-119 | -1.16039919763852  |              |    | 0.252 | 0.504 |
| 4.94552658815173e-115 | 7                  | FXD5         | GC |       |       |
| 1.43595559785269e-118 | 0.738619579772443  |              |    | 0.462 | 0.182 |
| 2.56016523541156e-114 | 7                  | DNMT1        | GC |       |       |
| 3.68521601295439e-118 | 0.752470487347986  |              |    | 0.484 | 0.207 |
| 6.57037162949638e-114 | 7                  | NANS         | GC |       |       |
| 1.3782566569769e-117  | 0.643633982193884  |              |    | 0.641 | 0.342 |
| 2.45729379372412e-113 | 7                  | DBNL         | GC |       |       |
| 1.39276724414111e-117 | 0.690741372362048  |              |    | 0.54  | 0.254 |
| 2.48316471957919e-113 | 7                  | RBM6         | GC |       |       |
| 2.61242159698052e-117 | 0.637096989329398  |              |    | 0.294 | 0.087 |
| 4.65768646525657e-113 | 7                  | FAM76B       | GC |       |       |
| 4.28880185190065e-117 | -0.968919638855867 |              |    | 0.029 | 0.227 |
| 7.64650482175366e-113 | 7                  | GBP2         | GC |       |       |
| 1.21827954726093e-116 | 0.55186153660944   | 0.848        |    | 0.598 |       |
| 2.17207060481151e-112 | 7                  | POLR2L       | GC |       |       |
| 3.11422906086388e-116 | 0.582675875871545  |              |    | 0.243 | 0.055 |
| 5.55235899261421e-112 | 7                  | FANCA        | GC |       |       |
| 4.56127487529253e-116 | 0.650990858525873  |              |    | 0.712 | 0.446 |
| 8.13229697515905e-112 | 7                  | CAPZA1       | GC |       |       |
| 1.32066784258407e-115 | 0.859318465438415  |              |    | 0.552 | 0.257 |
| 2.35461869654313e-111 | 7                  | PIM1         | GC |       |       |
| 2.02744706944622e-115 | 0.713239479813727  |              |    | 0.338 | 0.118 |
| 3.61473538011567e-111 | 7                  | AMFR         | GC |       |       |
| 6.34123281482394e-115 | 0.6041758093764    | 0.318        |    | 0.1   |       |
| 1.13057839855496e-110 | 7                  | OGG1         | GC |       |       |
| 1.27301142170548e-114 | -1.1036514952447   | 0.053        |    | 0.277 |       |
| 2.26965206375871e-110 | 7                  | GPR183       | GC |       |       |
| 1.39284931739076e-114 | 0.55615711394738   | 0.946        |    | 0.77  |       |
| 2.48331104797599e-110 | 7                  | ARHGDI3      | GC |       |       |
| 1.39475797515623e-114 | 0.512403915177368  |              |    | 0.211 | 0.048 |
| 2.48671399390604e-110 | 7                  | BORCS8-MEF2B | GC |       |       |
| 2.56006516229229e-113 | 0.396080252880994  |              |    | 0.128 | 0.014 |
| 4.56434017785092e-109 | 7                  | AL512631.1   | GC |       |       |
| 4.69739653141435e-113 | 0.527824224465602  |              |    | 0.819 | 0.585 |
| 8.37498827585864e-109 | 7                  | TBCA         | GC |       |       |
| 1.6328023731026e-112  | -1.11159915594988  |              |    | 0.314 | 0.531 |

|                       |                   |           |    |       |       |
|-----------------------|-------------------|-----------|----|-------|-------|
| 2.91112335100462e-108 | 7                 | ID3       | GC |       |       |
| 1.85023704954565e-112 | -0.96578224847728 |           |    | 0.061 | 0.256 |
| 3.29878763563494e-108 | 7                 | TNFRSF13B | GC |       |       |
| 2.98375621573437e-112 | -1.64813422803269 |           |    | 0.075 | 0.295 |
| 5.3197389570328e-108  | 7                 | MIR155HG  | GC |       |       |
| 1.69911851616931e-111 | 0.649992511406481 |           |    | 0.396 | 0.139 |
| 3.02935840247827e-107 | 7                 | PTPN18    | GC |       |       |
| 3.41173869407778e-111 | 0.691402304438024 |           |    | 0.67  | 0.387 |
| 6.08278891767127e-107 | 7                 | ORAI2     | GC |       |       |
| 4.8185497333451e-111  | 0.664788029070134 |           |    | 0.352 | 0.118 |
| 8.59099231958098e-107 | 7                 | MSI2      | GC |       |       |
| 6.56516790089298e-111 | 0.654263389289684 |           |    | 0.595 | 0.326 |
| 1.17050378505021e-106 | 7                 | SEPHS2    | GC |       |       |
| 1.3353308834552e-109  | -1.04661731870377 |           |    | 0.104 | 0.281 |
| 2.38076143211228e-105 | 7                 | KLF2      | GC |       |       |
| 1.81187536413167e-109 | 0.443202157277648 |           |    | 0.989 | 0.937 |
| 3.23039258671036e-105 | 7                 | H3F3A     | GC |       |       |
| 1.07210266324238e-108 | 0.68830547639486  | 0.434     |    | 0.171 |       |
| 1.91145183829484e-104 | 7                 | ZNF106    | GC |       |       |
| 1.53047972676671e-108 | 0.65687996391321  | 0.601     |    | 0.301 |       |
| 2.72869230485236e-104 | 7                 | PSIP1     | GC |       |       |
| 1.83218880221692e-108 | 0.675820175258148 |           |    | 0.583 | 0.313 |
| 3.26660941547254e-104 | 7                 | IMP4      | GC |       |       |
| 5.2680955919262e-108  | 0.663996489569323 |           |    | 0.386 | 0.134 |
| 9.39248763084522e-104 | 7                 | HSH2D     | GC |       |       |
| 5.65520490776462e-108 | 0.664931540441972 |           |    | 0.592 | 0.312 |
| 1.00826648300535e-103 | 7                 | HSBP1     | GC |       |       |
| 1.32476199473187e-107 | 0.665263439770796 |           |    | 0.6   | 0.326 |
| 2.36191816040745e-103 | 7                 | COX14     | GC |       |       |
| 2.79676805848663e-107 | 0.638759896926644 |           |    | 0.516 | 0.252 |
| 4.98635777147582e-103 | 7                 | ATXN10    | GC |       |       |
| 2.2597836764217e-105  | 0.600351773577313 |           |    | 0.382 | 0.124 |
| 4.02896831669224e-101 | 7                 | PLEKHA2   | GC |       |       |
| 8.26396654960042e-105 | 0.658183091225688 |           |    | 0.315 | 0.099 |
| 1.47338259612826e-100 | 7                 | E2F5      | GC |       |       |
| 1.3937950427998e-104  | 0.438149973197313 |           |    | 0.163 | 0.028 |
| 2.48499718180777e-100 | 7                 | RAPGEF5   | GC |       |       |
| 8.28685101214541e-104 | 0.625251441525856 |           |    | 0.304 | 0.087 |
| 1.47746266695541e-99  | 7                 | PXMP2     | GC |       |       |
| 1.8118262547215e-103  | 0.633777437766802 |           |    | 0.638 | 0.328 |
| 3.23030502954295e-99  | 7                 | LRMP      | GC |       |       |
| 7.22292526582574e-102 | -0.82495352712043 |           |    | 0.396 | 0.614 |
| 1.28777534564407e-97  | 7                 | IGHD      | GC |       |       |
| 7.48685435026727e-102 | 0.589920908385939 |           |    | 0.455 | 0.213 |
| 1.33483126210915e-97  | 7                 | RPIA      | GC |       |       |
| 8.4780926834961e-102  | 0.471657550551478 |           |    | 0.179 | 0.035 |
| 1.51155914454052e-97  | 7                 | SLC30A4   | GC |       |       |
| 8.94338637645303e-102 | -1.10849580351331 |           |    | 0.219 | 0.378 |
| 1.59451635705781e-97  | 7                 | SELL      | GC |       |       |
| 1.42679005448935e-101 | 0.679465891727262 |           |    | 0.473 | 0.217 |

|                       |                    |         |    |       |       |
|-----------------------|--------------------|---------|----|-------|-------|
| 2.54382398814907e-97  | 7                  | NSMCE1  | GC |       |       |
| 4.40933256684787e-101 | 0.676625059432608  |         |    | 0.571 | 0.278 |
| 7.86139903343306e-97  | 7                  | TUBA4A  | GC |       |       |
| 5.47342517251265e-101 | 0.565051988589954  |         |    | 0.234 | 0.064 |
| 9.75856974007281e-97  | 7                  | RPRD1B  | GC |       |       |
| 1.18963417691975e-100 | 0.650361850436361  |         |    | 0.424 | 0.167 |
| 2.12099877403022e-96  | 7                  | SYK     | GC |       |       |
| 3.45868888835763e-100 | 0.521227056783603  |         |    | 0.225 | 0.056 |
| 6.16649641905282e-96  | 7                  | DTX1    | GC |       |       |
| 9.25304609173167e-100 | 0.614797376739405  |         |    | 0.732 | 0.442 |
| 1.64972558769484e-95  | 7                  | PTPRC   | GC |       |       |
| 1.7844322355374e-99   | 0.498705339796796  |         |    | 0.903 | 0.716 |
| 3.18146423273963e-95  | 7                  | COX6C   | GC |       |       |
| 2.18197693482917e-99  | 0.688081631989148  |         |    | 0.554 | 0.278 |
| 3.89024667710693e-95  | 7                  | RUBCNL  | GC |       |       |
| 2.3717448626397e-99   | -1.0824623580157   | 0.224   |    | 0.472 |       |
| 4.22858391560033e-95  | 7                  | CD63    | GC |       |       |
| 3.82210208459715e-99  | 0.535977097698356  |         |    | 0.231 | 0.064 |
| 6.81442580662825e-95  | 7                  | TERF2   | GC |       |       |
| 4.76193281583435e-99  | 0.592678986635418  |         |    | 0.673 | 0.404 |
| 8.49005001735106e-95  | 7                  | HDAC1   | GC |       |       |
| 6.75930448930784e-99  | 0.651096851318771  |         |    | 0.459 | 0.197 |
| 1.2051163973987e-94   | 7                  | SNHG25  | GC |       |       |
| 1.08334148805802e-98  | -0.92346702045157  |         |    | 0.666 | 0.798 |
| 1.93148953905865e-94  | 7                  | HLA-E   | GC |       |       |
| 2.56370829499548e-98  | -0.797481005381877 |         |    | 0.947 | 0.961 |
| 4.57083551914743e-94  | 7                  | MT-ND2  | GC |       |       |
| 3.13096122392525e-98  | 0.552830254272553  |         |    | 0.697 | 0.429 |
| 5.58219076613632e-94  | 7                  | HMG1    | GC |       |       |
| 5.19436312845933e-98  | 0.593780579664351  |         |    | 0.7   | 0.436 |
| 9.26103002173014e-94  | 7                  | ATP5F1C | GC |       |       |
| 7.45986998229958e-98  | 0.563909961323332  |         |    | 0.725 | 0.437 |
| 1.33002021914419e-93  | 7                  | SEM1    | GC |       |       |
| 1.20933542436239e-97  | -0.996749571681222 |         |    | 0.324 | 0.52  |
| 2.15612412809571e-93  | 7                  | BANK1   | GC |       |       |
| 6.49547958769587e-97  | 0.558584521134887  |         |    | 0.359 | 0.137 |
| 1.1580790556903e-92   | 7                  | P2RY8   | GC |       |       |
| 9.35974308023394e-97  | 0.454506088228904  |         |    | 0.971 | 0.862 |
| 1.66874859377491e-92  | 7                  | CD79A   | GC |       |       |
| 5.52257056627164e-96  | 0.453800480380902  |         |    | 0.963 | 0.843 |
| 9.8461910626057e-92   | 7                  | CD37    | GC |       |       |
| 8.94136636872526e-96  | 0.640832426878179  |         |    | 0.503 | 0.226 |
| 1.59415620988003e-91  | 7                  | CCND3   | GC |       |       |
| 1.02490179321803e-95  | -0.605217198170235 |         |    | 0.988 | 0.991 |
| 1.82729740712843e-91  | 7                  | RPL9    | GC |       |       |
| 3.48980181773329e-95  | -0.832303858858906 |         |    | 0.967 | 0.976 |
| 6.22196766083668e-91  | 7                  | FTH1    | GC |       |       |
| 5.38739349230531e-95  | 0.581845571928934  |         |    | 0.568 | 0.287 |
| 9.60518385743113e-91  | 7                  | BLK     | GC |       |       |
| 7.10384178586192e-95  | 0.369072286111293  |         |    | 0.131 | 0.02  |



|                      |                    |          |    |       |       |
|----------------------|--------------------|----------|----|-------|-------|
| 1.26654395200132e-90 | 7                  | SERP2    | GC |       |       |
| 8.42828823937165e-95 | 0.499381044662444  |          |    | 0.853 | 0.636 |
| 1.50267951019757e-90 | 7                  | HNRNPC   | GC |       |       |
| 2.1130373945339e-94  | 0.585297476234159  |          |    | 0.338 | 0.123 |
| 3.76733437071448e-90 | 7                  | KMT2A    | GC |       |       |
| 5.72943409534541e-94 | -1.02216181186972  |          |    | 0.209 | 0.435 |
| 1.02150080485913e-89 | 7                  | PLP2     | GC |       |       |
| 1.1183868598468e-93  | -0.681592455167625 |          |    | 0.961 | 0.969 |
| 1.99397193242086e-89 | 7                  | MT-ND3   | GC |       |       |
| 1.33295402999325e-93 | 0.503087887493074  |          |    | 0.865 | 0.662 |
| 2.37652374007497e-89 | 7                  | SNX3     | GC |       |       |
| 1.6379025361186e-93  | 0.461288879415068  |          |    | 0.901 | 0.699 |
| 2.92021643164584e-89 | 7                  | NDUFA4   | GC |       |       |
| 1.64094292220203e-92 | -0.873503868813878 |          |    | 0.093 | 0.259 |
| 2.92563713599399e-88 | 7                  | FCMR     | GC |       |       |
| 4.96823076781232e-92 | 0.55098667114343   | 0.287    |    | 0.098 |       |
| 8.85785863593258e-88 | 7                  | ACSF3    | GC |       |       |
| 5.72385048274288e-92 | 0.593322609834979  |          |    | 0.333 | 0.12  |
| 1.02050530256823e-87 | 7                  | RABGAP1L | GC |       |       |
| 6.77274720565324e-92 | 0.568646521247016  |          |    | 0.489 | 0.219 |
| 1.20751309929592e-87 | 7                  | ATM      | GC |       |       |
| 1.64448028251607e-91 | 0.738978214786215  |          |    | 0.488 | 0.248 |
| 2.9319438956979e-87  | 7                  | MDM4     | GC |       |       |
| 1.66418629657496e-91 | 0.477933684475051  |          |    | 0.854 | 0.632 |
| 2.96707774816349e-87 | 7                  | ATP5MF   | GC |       |       |
| 4.92969881302469e-91 | 0.54737039509383   | 0.299    |    | 0.102 |       |
| 8.78916001374171e-87 | 7                  | MAP4K2   | GC |       |       |
| 1.7005302668229e-90  | 0.635329054333685  |          |    | 0.448 | 0.2   |
| 3.03187541271855e-86 | 7                  | SYAP1    | GC |       |       |
| 2.68565342408404e-90 | 0.621652445244026  |          |    | 0.272 | 0.088 |
| 4.78825148979943e-86 | 7                  | RNGTT    | GC |       |       |
| 3.43892721382009e-89 | 0.647587494843646  |          |    | 0.599 | 0.317 |
| 6.13126332951985e-85 | 7                  | GYPC     | GC |       |       |
| 3.53447306568134e-89 | -1.36560921622209  |          |    | 0.107 | 0.27  |
| 6.30161202880326e-85 | 7                  | S100A4   | GC |       |       |
| 3.78446792287733e-89 | 0.585968378754008  |          |    | 0.373 | 0.153 |
| 6.74732785969798e-85 | 7                  | UBE2R2   | GC |       |       |
| 8.65546616945993e-89 | 0.582877410130643  |          |    | 0.493 | 0.233 |
| 1.54318306335301e-84 | 7                  | SLBP     | GC |       |       |
| 1.17894919984358e-88 | 0.395779438673067  |          |    | 0.135 | 0.021 |
| 2.10194852840111e-84 | 7                  | IQCD     | GC |       |       |
| 1.4276542609858e-88  | 0.526432963345312  |          |    | 0.831 | 0.606 |
| 2.54536478191157e-84 | 7                  | UQCR10   | GC |       |       |
| 1.93215256734327e-88 | 0.550331283959854  |          |    | 0.562 | 0.304 |
| 3.44483481231631e-84 | 7                  | SPI1     | GC |       |       |
| 2.57251285625005e-88 | 0.465640096907734  |          |    | 0.884 | 0.679 |
| 4.58653317140821e-84 | 7                  | PPP1CA   | GC |       |       |
| 3.19681097679451e-88 | 0.373421125078516  |          |    | 0.973 | 0.901 |
| 5.69959429052692e-84 | 7                  | SRP14    | GC |       |       |
| 3.58547176558587e-88 | 0.428687154093221  |          |    | 0.935 | 0.802 |

|                      |                   |          |       |       |  |  |
|----------------------|-------------------|----------|-------|-------|--|--|
| 6.39253761086304e-84 | 7                 | TMA7     | GC    |       |  |  |
| 4.01278047670214e-88 | 0.57594412180094  | 0.53     | 0.285 |       |  |  |
| 7.15438631191224e-84 | 7                 | LYPLA1   | GC    |       |  |  |
| 4.17319529756205e-88 | 0.443178089885004 |          | 0.804 | 0.597 |  |  |
| 7.44038989602338e-84 | 7                 | RBM3     | GC    |       |  |  |
| 7.14456546975005e-88 | 0.461913162377118 |          | 0.881 | 0.677 |  |  |
| 1.27380457760174e-83 | 7                 | COX6A1   | GC    |       |  |  |
| 1.04072002220906e-87 | 0.378111093087198 |          | 0.963 | 0.892 |  |  |
| 1.85549972759654e-83 | 7                 | SLC25A6  | GC    |       |  |  |
| 5.1156439688243e-87  | 0.556663808328298 |          | 0.584 | 0.329 |  |  |
| 9.12068163201684e-83 | 7                 | RBBP4    | GC    |       |  |  |
| 6.00062042731008e-87 | 0.583460162292306 |          | 0.393 | 0.164 |  |  |
| 1.06985061598511e-82 | 7                 | CDK13    | GC    |       |  |  |
| 6.50804454386118e-87 | 0.57904932109108  | 0.313    | 0.116 |       |  |  |
| 1.16031926172501e-82 | 7                 | SPATS2   | GC    |       |  |  |
| 1.10893174496996e-86 | -1.14406374886033 |          | 0.269 | 0.463 |  |  |
| 1.97711440810694e-82 | 7                 | JUNB     | GC    |       |  |  |
| 1.98027383927144e-86 | 0.502138825622337 |          | 0.261 | 0.088 |  |  |
| 3.53063022803705e-82 | 7                 | STK40    | GC    |       |  |  |
| 3.07281406891603e-86 | 0.555697729495679 |          | 0.331 | 0.127 |  |  |
| 5.4785202034704e-82  | 7                 | MAP4K1   | GC    |       |  |  |
| 3.15242967223362e-86 | 0.508598650379392 |          | 0.626 | 0.367 |  |  |
| 5.62046686262531e-82 | 7                 | ZFAND6   | GC    |       |  |  |
| 3.20488738246398e-86 | 0.771131885629258 |          | 0.618 | 0.397 |  |  |
| 5.71399371419504e-82 | 7                 | SMIM14   | GC    |       |  |  |
| 3.82883158753427e-86 | 0.513696905235819 |          | 0.662 | 0.41  |  |  |
| 6.82642383741484e-82 | 7                 | FAM49B   | GC    |       |  |  |
| 4.23280031022397e-86 | 0.470357215128192 |          | 0.853 | 0.639 |  |  |
| 7.54665967309832e-82 | 7                 | UQCR11   | GC    |       |  |  |
| 4.86131962850283e-86 | 0.509712518314987 |          | 0.691 | 0.442 |  |  |
| 8.6672467656577e-82  | 7                 | MAP1LC3B | GC    |       |  |  |
| 8.79794686687975e-86 | 0.422185591010094 |          | 0.146 | 0.026 |  |  |
| 1.56858594689599e-81 | 7                 | RNF144B  | GC    |       |  |  |
| 1.37255152253919e-85 | 0.56713880709675  | 0.537    | 0.273 |       |  |  |
| 2.44712210953512e-81 | 7                 | LAT2     | GC    |       |  |  |
| 1.52777078678215e-85 | 0.595182778788472 |          | 0.493 | 0.229 |  |  |
| 2.72386253575389e-81 | 7                 | SP140    | GC    |       |  |  |
| 1.7240847843398e-85  | 0.456935123018947 |          | 0.872 | 0.69  |  |  |
| 3.07387076199944e-81 | 7                 | RHOA     | GC    |       |  |  |
| 3.86292737383469e-85 | 0.597051533502488 |          | 0.579 | 0.311 |  |  |
| 6.88721321480987e-81 | 7                 | NAA38    | GC    |       |  |  |
| 7.14025434724534e-85 | 0.604430280602944 |          | 0.173 | 0.029 |  |  |
| 1.27303594757037e-80 | 7                 | PEG10    | GC    |       |  |  |
| 7.26834949498826e-85 | 0.551941222007347 |          | 0.299 | 0.109 |  |  |
| 1.29587403146146e-80 | 7                 | C12orf49 | GC    |       |  |  |
| 8.01913564289708e-85 | 0.578552144012248 |          | 0.505 | 0.275 |  |  |
| 1.42973169377212e-80 | 7                 | PRDX3    | GC    |       |  |  |
| 1.16911383042893e-84 | 0.574259049257916 |          | 0.549 | 0.29  |  |  |
| 2.08441304827175e-80 | 7                 | ITSN2    | GC    |       |  |  |
| 2.0312292060681e-84  | 0.436221392994685 |          | 0.873 | 0.667 |  |  |

|                      |                    |          |    |       |       |
|----------------------|--------------------|----------|----|-------|-------|
| 3.62147855149881e-80 | 7                  | ATP5ME   | GC |       |       |
| 2.2095352494098e-84  | 0.486751227424248  |          |    | 0.894 | 0.695 |
| 3.93938039617274e-80 | 7                  | COMMD6   | GC |       |       |
| 2.54220944787943e-84 | 0.413252675059061  |          |    | 0.153 | 0.035 |
| 4.53250522462423e-80 | 7                  | EEDP1    | GC |       |       |
| 6.16364726542875e-84 | 0.55477025846727   | 0.342    |    | 0.133 |       |
| 1.09891667095329e-79 | 7                  | CUL3     | GC |       |       |
| 7.59837062975063e-84 | 0.381574730173715  |          |    | 0.935 | 0.8   |
| 1.35471349957824e-79 | 7                  | HNRNPK   | GC |       |       |
| 9.4566283555749e-84  | 0.536850566781477  |          |    | 0.597 | 0.354 |
| 1.68602226951545e-79 | 7                  | PPP2CA   | GC |       |       |
| 1.54253647095276e-83 | 0.500627284805937  |          |    | 0.748 | 0.492 |
| 2.75018827406168e-79 | 7                  | RTRAF    | GC |       |       |
| 1.6231116226028e-83  | 0.436874294749516  |          |    | 0.853 | 0.645 |
| 2.89384571193853e-79 | 7                  | ATP5F1A  | GC |       |       |
| 4.34418172882329e-83 | 0.70147504491664   | 0.696    |    | 0.384 |       |
| 7.74524160431905e-79 | 7                  | CSTB     | GC |       |       |
| 7.19724807415659e-83 | 0.440439561478343  |          |    | 0.935 | 0.826 |
| 1.28319735914138e-78 | 7                  | UQCRB    | GC |       |       |
| 8.82118932202528e-83 | 0.424250735955064  |          |    | 0.901 | 0.723 |
| 1.57272984422389e-78 | 7                  | OST4     | GC |       |       |
| 2.17715202573739e-82 | 0.532179308041798  |          |    | 0.37  | 0.161 |
| 3.8816443466872e-78  | 7                  | CYB5R3   | GC |       |       |
| 3.66664436861585e-82 | -0.870016271919811 |          |    | 0.188 | 0.354 |
| 6.5372602448052e-78  | 7                  | TRAF3IP3 | GC |       |       |
| 3.89992433740127e-82 | 0.565062381335877  |          |    | 0.604 | 0.345 |
| 6.95317510115272e-78 | 7                  | CD19     | GC |       |       |
| 4.17068750147901e-82 | 0.465028591179836  |          |    | 0.236 | 0.077 |
| 7.43591874638693e-78 | 7                  | PARN     | GC |       |       |
| 4.53077748919812e-82 | 0.528386139589184  |          |    | 0.493 | 0.254 |
| 8.07792318549132e-78 | 7                  | THOC7    | GC |       |       |
| 1.54054443113612e-81 | -0.836841595067278 |          |    | 0.023 | 0.178 |
| 2.74663666627258e-77 | 7                  | TNFRSF18 | GC |       |       |
| 1.93583595152014e-81 | 0.380589205884032  |          |    | 0.135 | 0.03  |
| 3.45140191796526e-77 | 7                  | KANK1    | GC |       |       |
| 2.25649454550075e-81 | 0.340900292492394  |          |    | 0.11  | 0.017 |
| 4.02310412517328e-77 | 7                  | LOXL2    | GC |       |       |
| 4.42121804705649e-81 | 0.585611474914472  |          |    | 0.643 | 0.352 |
| 7.88258965609702e-77 | 7                  | RCSD1    | GC |       |       |
| 1.33704362083365e-80 | 0.565244076247571  |          |    | 0.459 | 0.25  |
| 2.38381507158432e-76 | 7                  | CDV3     | GC |       |       |
| 3.14560977939582e-80 | 0.540162555682111  |          |    | 0.296 | 0.11  |
| 5.60830767568481e-76 | 7                  | ABI3     | GC |       |       |
| 5.29419819144427e-80 | 0.430918670667356  |          |    | 0.884 | 0.693 |
| 9.439025955526e-76   | 7                  | ELOB     | GC |       |       |
| 6.00464147992308e-80 | 0.537574683625978  |          |    | 0.183 | 0.042 |
| 1.07056752945549e-75 | 7                  | COL9A3   | GC |       |       |
| 7.9929661566405e-80  | 0.599230197976799  |          |    | 0.501 | 0.261 |
| 1.42506593606743e-75 | 7                  | TOP1     | GC |       |       |
| 1.25940405460098e-79 | 0.596999111835066  |          |    | 0.356 | 0.138 |

|                      |                    |         |    |       |       |
|----------------------|--------------------|---------|----|-------|-------|
| 2.24539148894808e-75 | 7                  | SH2B2   | GC |       |       |
| 1.26372718796028e-79 | 0.512558559970628  |         |    | 0.573 | 0.341 |
| 2.25309920341439e-75 | 7                  | LSM14A  | GC |       |       |
| 3.67973235952631e-79 | 0.43469898009515   | 0.208   |    | 0.062 |       |
| 6.56059482379946e-75 | 7                  | MFHAS1  | GC |       |       |
| 4.37290274884713e-79 | 0.405770614313639  |         |    | 0.9   | 0.709 |
| 7.79644831091954e-75 | 7                  | COX6B1  | GC |       |       |
| 6.62966395609334e-79 | 0.437617679244763  |         |    | 0.851 | 0.625 |
| 1.18200278673188e-74 | 7                  | PSMA4   | GC |       |       |
| 1.17994350183584e-78 | 0.544078065201038  |         |    | 0.591 | 0.32  |
| 2.10372126942311e-74 | 7                  | CCM2    | GC |       |       |
| 2.33345394006506e-78 | 0.512533167329116  |         |    | 0.366 | 0.163 |
| 4.160315029742e-74   | 7                  | COMMD7  | GC |       |       |
| 2.50447278239028e-78 | 0.550466979617532  |         |    | 0.509 | 0.26  |
| 4.46522452372363e-74 | 7                  | SEPT9   | GC |       |       |
| 2.77477693423198e-78 | 0.562462567034163  |         |    | 0.474 | 0.23  |
| 4.9471497960422e-74  | 7                  | PTRHD1  | GC |       |       |
| 3.25779622760801e-78 | -0.763706353665177 |         |    | 0.121 | 0.285 |
| 5.80832489420232e-74 | 7                  | IFITM2  | GC |       |       |
| 4.62805652062634e-78 | 0.563988541423138  |         |    | 0.459 | 0.225 |
| 8.2513619706247e-74  | 7                  | ZCCHC7  | GC |       |       |
| 4.86232929292957e-78 | 0.508023538754832  |         |    | 0.296 | 0.103 |
| 8.66904689636412e-74 | 7                  | MOB3A   | GC |       |       |
| 8.12246616635756e-78 | 0.62350899726732   | 0.452   |    | 0.228 |       |
| 1.44815449279989e-73 | 7                  | DSTN    | GC |       |       |
| 1.52071587031417e-77 | 0.459402719774032  |         |    | 0.715 | 0.476 |
| 2.71128432518313e-73 | 7                  | UBE2L3  | GC |       |       |
| 2.33262524649988e-77 | 0.53878600751793   | 0.431   |    | 0.201 |       |
| 4.15883755198463e-73 | 7                  | EHD1    | GC |       |       |
| 3.08017326864843e-77 | 0.504553179715012  |         |    | 0.244 | 0.066 |
| 5.49164092067329e-73 | 7                  | CDCA7   | GC |       |       |
| 7.57701131143916e-77 | 0.38403053599053   | 0.153   |    | 0.038 |       |
| 1.35090534671649e-72 | 7                  | ACY3    | GC |       |       |
| 9.8330665494693e-77  | -0.498841504711969 |         |    | 0.978 | 0.986 |
| 1.75313743510488e-72 | 7                  | RPL27   | GC |       |       |
| 1.74446578133495e-76 | 0.417453590188227  |         |    | 0.173 | 0.04  |
| 3.11020804154208e-72 | 7                  | MYBL1   | GC |       |       |
| 3.72756932935448e-76 | 0.494744240958742  |         |    | 0.194 | 0.056 |
| 6.6458833573061e-72  | 7                  | TESC    | GC |       |       |
| 7.40753467805298e-76 | 0.437551416414448  |         |    | 0.792 | 0.545 |
| 1.32068935775007e-71 | 7                  | SEC61G  | GC |       |       |
| 1.06390057451989e-75 | 0.510218421560761  |         |    | 0.286 | 0.094 |
| 1.89682833431152e-71 | 7                  | BACH2   | GC |       |       |
| 1.26451957873779e-75 | 0.414997360298456  |         |    | 0.175 | 0.045 |
| 2.25451195693161e-71 | 7                  | PEX5    | GC |       |       |
| 3.15124842821301e-75 | 0.466148439837933  |         |    | 0.247 | 0.085 |
| 5.61836082266098e-71 | 7                  | XPNPEP1 | GC |       |       |
| 1.01442912233913e-74 | 0.405897296245313  |         |    | 0.881 | 0.689 |
| 1.80862568221843e-70 | 7                  | ATP5MPL | GC |       |       |
| 1.28849502293778e-74 | 0.402885757605419  |         |    | 0.833 | 0.599 |

|                      |                    |         |    |       |       |
|----------------------|--------------------|---------|----|-------|-------|
| 2.29725777639577e-70 | 7                  | POMP    | GC |       |       |
| 2.46368583291135e-74 | 0.568403383378546  |         |    | 0.415 | 0.178 |
| 4.39250547149765e-70 | 7                  | HLA-D0B | GC |       |       |
| 1.03380426650861e-73 | 0.422130892532136  |         |    | 0.851 | 0.661 |
| 1.84316962675821e-69 | 7                  | GDI2    | GC |       |       |
| 1.10108427456099e-73 | 0.493815362387815  |         |    | 0.726 | 0.475 |
| 1.96312315311478e-69 | 7                  | NDUFB1  | GC |       |       |
| 1.43122393849443e-73 | 0.603136670719166  |         |    | 0.236 | 0.064 |
| 2.55172915994172e-69 | 7                  | RASSF6  | GC |       |       |
| 1.70468163794804e-73 | 0.533820450963418  |         |    | 0.357 | 0.137 |
| 3.03927689229755e-69 | 7                  | TAGAP   | GC |       |       |
| 2.54508406956415e-73 | 0.373157231390015  |         |    | 0.132 | 0.034 |
| 4.53763038762592e-69 | 7                  | IGLC5   | GC |       |       |
| 7.47371696910946e-73 | 0.417058308926624  |         |    | 0.881 | 0.692 |
| 1.33248899842253e-68 | 7                  | CCNI    | GC |       |       |
| 8.38566217462727e-73 | 0.54198200284145   | 0.581   |    | 0.347 |       |
| 1.4950797091143e-68  | 7                  | RAB11A  | GC |       |       |
| 1.05369985495057e-72 | -0.785849831124971 |         |    | 0.048 | 0.204 |
| 1.87864147139137e-68 | 7                  | YBX3    | GC |       |       |
| 1.14411544346399e-72 | 0.471729133619293  |         |    | 0.669 | 0.421 |
| 2.03984342415195e-68 | 7                  | CLTA    | GC |       |       |
| 2.15970137275355e-72 | 0.497501823645568  |         |    | 0.578 | 0.337 |
| 3.85053157748231e-68 | 7                  | LSM6    | GC |       |       |
| 8.1241291412952e-72  | 0.488010960562108  |         |    | 0.694 | 0.469 |
| 1.44845098460152e-67 | 7                  | UBE2N   | GC |       |       |
| 1.0493102730825e-71  | 0.51961779650325   | 0.283   |    | 0.097 |       |
| 1.87081528587878e-67 | 7                  | SORL1   | GC |       |       |
| 1.12149041288181e-71 | 0.515226010881803  |         |    | 0.299 | 0.107 |
| 1.99950525712698e-67 | 7                  | HDAC7   | GC |       |       |
| 1.6691146451711e-71  | -0.697256769775202 |         |    | 0.05  | 0.189 |
| 2.97586450087556e-67 | 7                  | PLPP5   | GC |       |       |
| 1.81182145593631e-71 | 0.434492028406875  |         |    | 0.167 | 0.046 |
| 3.23029647378885e-67 | 7                  | UCHL1   | GC |       |       |
| 2.63831861114537e-71 | 0.373496061397838  |         |    | 0.153 | 0.034 |
| 4.70385825181108e-67 | 7                  | RTN4IP1 | GC |       |       |
| 3.43993378811564e-71 | 0.549815131355145  |         |    | 0.529 | 0.301 |
| 6.13305795083138e-67 | 7                  | PGLS    | GC |       |       |
| 6.54523209782636e-71 | 0.55297319035153   | 0.465   |    | 0.242 |       |
| 1.16694943072146e-66 | 7                  | TIFA    | GC |       |       |
| 9.01108010860192e-71 | 0.550348544165559  |         |    | 0.62  | 0.372 |
| 1.60658547256264e-66 | 7                  | LSM8    | GC |       |       |
| 9.19633893221842e-71 | 0.522658133943676  |         |    | 0.497 | 0.269 |
| 1.63961526822522e-66 | 7                  | STK17B  | GC |       |       |
| 1.31324673072117e-70 | 0.53671705862521   | 0.298   |    | 0.096 |       |
| 2.34138759620278e-66 | 7                  | RM12    | GC |       |       |
| 1.53762153394039e-70 | 0.487537989805867  |         |    | 0.351 | 0.158 |
| 2.74142543286231e-66 | 7                  | COX11   | GC |       |       |
| 1.96322098825703e-70 | 0.536510267963626  |         |    | 0.267 | 0.092 |
| 3.50022669996347e-66 | 7                  | MX1     | GC |       |       |
| 4.16906015449842e-70 | -0.650060830924274 |         |    | 0.032 | 0.169 |

|                      |                    |            |    |       |       |
|----------------------|--------------------|------------|----|-------|-------|
| 7.43301734945523e-66 | 7                  | MARCKS     | GC |       |       |
| 9.90482387548657e-70 | 0.545892145461981  |            |    | 0.47  | 0.23  |
| 1.7659310487605e-65  | 7                  | NCF4       | GC |       |       |
| 1.08882920104426e-69 | 0.444696383620426  |            |    | 0.691 | 0.467 |
| 1.9412735825418e-65  | 7                  | PRELID1    | GC |       |       |
| 2.87096324463111e-69 | 0.497173855800481  |            |    | 0.43  | 0.22  |
| 5.11864036885281e-65 | 7                  | IAH1       | GC |       |       |
| 7.67501951979417e-69 | 0.482273028118561  |            |    | 0.598 | 0.356 |
| 1.3683792301841e-64  | 7                  | TERF2IP    | GC |       |       |
| 7.97231128263993e-69 | 0.449546574598459  |            |    | 0.244 | 0.082 |
| 1.42138337858187e-64 | 7                  | MAP4K4     | GC |       |       |
| 1.87555718500467e-68 | 0.478144295690341  |            |    | 0.315 | 0.13  |
| 3.34393090514483e-64 | 7                  | CLIC4      | GC |       |       |
| 2.08891835880405e-68 | 0.336928009744619  |            |    | 0.134 | 0.033 |
| 3.72433254191173e-64 | 7                  | PRDM15     | GC |       |       |
| 2.32190584002359e-68 | 0.581734833634098  |            |    | 0.304 | 0.115 |
| 4.13972592217807e-64 | 7                  | AL139020.1 | GC |       |       |
| 2.87351712162929e-68 | 0.474011828741185  |            |    | 0.321 | 0.139 |
| 5.12319367615286e-64 | 7                  | ANKRD13A   | GC |       |       |
| 4.02706766935327e-68 | 0.431098042234734  |            |    | 0.82  | 0.628 |
| 7.17985894768995e-64 | 7                  | UQCRH      | GC |       |       |
| 4.29955259597794e-68 | 0.522416908670629  |            |    | 0.343 | 0.14  |
| 7.66567232336907e-64 | 7                  | ALOX5      | GC |       |       |
| 1.66231501653786e-67 | 0.496432803598676  |            |    | 0.458 | 0.235 |
| 2.96374144298535e-63 | 7                  | WAS        | GC |       |       |
| 2.29790035791818e-67 | 0.480308110621619  |            |    | 0.471 | 0.241 |
| 4.09692654813233e-63 | 7                  | WIPF1      | GC |       |       |
| 2.52051319236286e-67 | 0.478379067497909  |            |    | 0.389 | 0.185 |
| 4.49382297066374e-63 | 7                  | REPIN1     | GC |       |       |
| 5.86603974276946e-67 | -0.88974883572028  |            |    | 0.057 | 0.203 |
| 1.04585622573837e-62 | 7                  | ACP5       | GC |       |       |
| 1.99294632478477e-66 | 0.490842728914092  |            |    | 0.299 | 0.114 |
| 3.55322400245876e-62 | 7                  | EPS15      | GC |       |       |
| 2.6215368644774e-66  | 0.525238968508281  |            |    | 0.325 | 0.122 |
| 4.67393807567675e-62 | 7                  | STIM2      | GC |       |       |
| 2.78122318009659e-66 | 0.401630109467431  |            |    | 0.184 | 0.049 |
| 4.95864280779421e-62 | 7                  | BCL6       | GC |       |       |
| 3.06174984304587e-66 | 0.471387840825376  |            |    | 0.467 | 0.231 |
| 5.45879379516648e-62 | 7                  | MCUB       | GC |       |       |
| 3.12664976636025e-66 | -0.995013146197009 |            |    | 0.16  | 0.322 |
| 5.57450386844369e-62 | 7                  | CD69       | GC |       |       |
| 4.7564851602427e-66  | 0.486635772900402  |            |    | 0.587 | 0.356 |
| 8.48033739219671e-62 | 7                  | RBBP7      | GC |       |       |
| 5.07287169353018e-66 | 0.487146189774357  |            |    | 0.467 | 0.238 |
| 9.04442294239496e-62 | 7                  | CSK        | GC |       |       |
| 6.89379170376723e-66 | 0.335741252316486  |            |    | 0.138 | 0.029 |
| 1.22909412286466e-61 | 7                  | CTPS2      | GC |       |       |
| 8.12414255101946e-66 | 0.496314483576993  |            |    | 0.439 | 0.224 |
| 1.44845337542126e-61 | 7                  | MTF2       | GC |       |       |
| 9.16680380770946e-66 | 0.413839305316205  |            |    | 0.788 | 0.55  |

|                      |   |                    |       |       |
|----------------------|---|--------------------|-------|-------|
| 1.63434945087652e-61 | 7 | ATP5PF GC          |       |       |
| 1.01469812605087e-65 |   | 0.494464606485201  | 0.525 | 0.307 |
| 1.8091052889361e-61  | 7 | NDUFAF3 GC         |       |       |
| 2.05930425482078e-65 |   | 0.530614302504492  | 0.558 | 0.323 |
| 3.67153355591998e-61 | 7 | BPTF GC            |       |       |
| 3.76182629615217e-65 |   | 0.462744861832957  | 0.3   | 0.115 |
| 6.7069601034097e-61  | 7 | SSBP2 GC           |       |       |
| 4.45754221506968e-65 |   | 0.476259335935048  | 0.543 | 0.312 |
| 7.94735201524773e-61 | 7 | IGBP1 GC           |       |       |
| 7.5739389549675e-65  |   | 0.468382484755226  | 0.463 | 0.25  |
| 1.35035757628116e-60 | 7 | ABI1 GC            |       |       |
| 8.32405599889442e-65 |   | 0.461356405537872  | 0.534 | 0.279 |
| 1.48409594404289e-60 | 7 | DCK GC             |       |       |
| 8.44347000215613e-65 |   | 0.425991468909387  | 0.692 | 0.451 |
| 1.50538626668442e-60 | 7 | SWAP70 GC          |       |       |
| 1.37549748729899e-64 |   | -0.678716799361171 | 0.063 | 0.2   |
| 2.45237447010536e-60 | 7 | CLEC2B GC          |       |       |
| 1.40601914238475e-64 |   | 0.48171014266951   | 0.398 | 0.207 |
| 2.50679152895777e-60 | 7 | PHAX GC            |       |       |
| 1.66742151709826e-64 |   | 0.616090147036832  | 0.3   | 0.101 |
| 2.97284582283448e-60 | 7 | VPREB3 GC          |       |       |
| 1.87112381202789e-64 |   | 0.501039550857384  | 0.36  | 0.157 |
| 3.33602664446452e-60 | 7 | PPP1R18 GC         |       |       |
| 3.05377061208363e-64 |   | 0.487249933124144  | 0.587 | 0.349 |
| 5.4445676242839e-60  | 7 | TMEM243 GC         |       |       |
| 4.11323179546875e-64 |   | 0.438103326760852  | 0.271 | 0.111 |
| 7.33348096814123e-60 | 7 | ACYP2 GC           |       |       |
| 6.22620748951042e-64 |   | 0.40997456771174   | 0.706 | 0.481 |
| 1.11007053330481e-59 | 7 | CCT8 GC            |       |       |
| 6.33364393420016e-64 |   | 0.401196612177215  | 0.725 | 0.515 |
| 1.12922537702855e-59 | 7 | SELENOT GC         |       |       |
| 8.56172671128252e-64 |   | 0.377793120876596  | 0.869 | 0.714 |
| 1.52647025535456e-59 | 7 | EIF3F GC           |       |       |
| 1.18266399853699e-63 |   | 0.438879205680086  | 0.311 | 0.133 |
| 2.10857164299159e-59 | 7 | ITGB1 GC           |       |       |
| 1.83963964590744e-63 |   | 0.411770840910713  | 0.648 | 0.432 |
| 3.27989352468838e-59 | 7 | ACTR2 GC           |       |       |
| 3.45069680831197e-63 |   | 0.399634578305082  | 0.592 | 0.366 |
| 6.1522473395394e-59  | 7 | LCP1 GC            |       |       |
| 3.96379474293345e-63 |   | 0.425917103374797  | 0.623 | 0.409 |
| 7.06704964717605e-59 | 7 | COX7A2L GC         |       |       |
| 4.35736270549464e-63 |   | -0.748751442924898 | 0.059 | 0.216 |
| 7.76874196762639e-59 | 7 | MGST3 GC           |       |       |
| 5.45508011342157e-63 |   | -0.414904538212165 | 0.998 | 0.999 |
| 9.72586233421931e-59 | 7 | RPL13 GC           |       |       |
| 5.65494850255302e-63 |   | 0.362112305003669  | 0.798 | 0.593 |
| 1.00822076852018e-58 | 7 | PSMA2 GC           |       |       |
| 8.24271366853896e-63 |   | 0.500551381825695  | 0.644 | 0.409 |
| 1.46959341996381e-58 | 7 | CTSH GC            |       |       |
| 1.27404766396212e-62 |   | 0.361173323633064  | 0.825 | 0.62  |

|                      |   |                    |       |       |
|----------------------|---|--------------------|-------|-------|
| 2.27149958007806e-58 | 7 | ATP5F1B GC         |       |       |
| 1.43700768831357e-62 |   | -0.599968722240722 | 0.03  | 0.154 |
| 2.56204100749427e-58 | 7 | CELF2 GC           |       |       |
| 2.09701614849045e-62 |   | 0.357551722999309  | 0.137 | 0.035 |
| 3.73877009114362e-58 | 7 | TOX GC             |       |       |
| 3.33291973738277e-62 |   | -0.494025795374542 | 0.972 | 0.983 |
| 5.94226259977974e-58 | 7 | RPS21 GC           |       |       |
| 3.64135905647379e-62 |   | 0.502934300021643  | 0.567 | 0.329 |
| 6.49217906178712e-58 | 7 | NDUFC1 GC          |       |       |
| 3.92663200985985e-62 |   | 0.364504676337487  | 0.825 | 0.64  |
| 7.00079221037913e-58 | 7 | ZFAS1 GC           |       |       |
| 5.26060845866828e-62 |   | 0.430457412939564  | 0.495 | 0.281 |
| 9.37913882095968e-58 | 7 | PFDN4 GC           |       |       |
| 5.30985121350141e-62 |   | 0.453468795483568  | 0.226 | 0.087 |
| 9.46693372855167e-58 | 7 | FAM208B GC         |       |       |
| 5.907982201839e-62   |   | 0.497118364752859  | 0.365 | 0.168 |
| 1.05333414676588e-57 | 7 | EHMT1 GC           |       |       |
| 7.11789103047356e-62 |   | 0.517241164823745  | 0.482 | 0.285 |
| 1.26904879182313e-57 | 7 | HSPA4 GC           |       |       |
| 1.72474392860767e-61 |   | 0.444086938472688  | 0.626 | 0.349 |
| 3.07504595031462e-57 | 7 | H2AFV GC           |       |       |
| 2.25289724190287e-61 |   | 0.427315164951496  | 0.193 | 0.058 |
| 4.01669049258862e-57 | 7 | ZNF608 GC          |       |       |
| 2.36598989428274e-61 |   | 0.487458159221823  | 0.424 | 0.225 |
| 4.21832338251671e-57 | 7 | CHCHD10 GC         |       |       |
| 5.36357922759696e-61 |   | 0.43742334943825   | 0.212 | 0.07  |
| 9.56272540488262e-57 | 7 | DNASE1 GC          |       |       |
| 8.05421257005376e-61 |   | -0.408530208400026 | 0.999 | 0.998 |
| 1.43598555911488e-56 | 7 | RPLP2 GC           |       |       |
| 9.58372103491157e-61 |   | 0.337582327096375  | 0.127 | 0.026 |
| 1.70868162331438e-56 | 7 | FGD6 GC            |       |       |
| 1.06642897151199e-60 |   | 0.436093168977175  | 0.424 | 0.213 |
| 1.90133621330873e-56 | 7 | MPLKIP GC          |       |       |
| 1.40833495742298e-60 |   | 0.493535813012961  | 0.436 | 0.226 |
| 2.51092039558943e-56 | 7 | CPNE3 GC           |       |       |
| 1.65542806985461e-60 |   | -0.800114086748515 | 0.089 | 0.243 |
| 2.95146270574378e-56 | 7 | CAPG GC            |       |       |
| 2.1728427777202e-60  |   | 0.475489265732443  | 0.31  | 0.135 |
| 3.87396138839735e-56 | 7 | IN080C GC          |       |       |
| 2.86368147569356e-60 |   | 0.400621626904817  | 0.725 | 0.509 |
| 5.10565770301405e-56 | 7 | ATP5PB GC          |       |       |
| 3.02860041244633e-60 |   | 0.314445912030679  | 0.117 | 0.024 |
| 5.39969167535056e-56 | 7 | LHFPL2 GC          |       |       |
| 3.29136851825285e-60 |   | 0.33937108687466   | 0.843 | 0.691 |
| 5.868180931193e-56   | 7 | CIRBP GC           |       |       |
| 3.57890097622202e-60 |   | 0.502138544440131  | 0.373 | 0.17  |
| 6.38082255050625e-56 | 7 | PLIN3 GC           |       |       |
| 3.85900326381095e-60 |   | 0.440506217561767  | 0.176 | 0.053 |
| 6.88021691904854e-56 | 7 | RGS16 GC           |       |       |
| 7.7437718305607e-60  |   | 0.408142787823666  | 0.185 | 0.061 |



|                      |                    |         |       |  |  |  |
|----------------------|--------------------|---------|-------|--|--|--|
| 1.38063707967067e-55 | 7                  | QPCT    | GC    |  |  |  |
| 8.77466433469201e-60 | 0.32773959020603   | 0.119   | 0.024 |  |  |  |
| 1.56443490423224e-55 | 7                  | HTR3A   | GC    |  |  |  |
| 1.04129582855865e-59 | 0.447898278685051  | 0.404   | 0.201 |  |  |  |
| 1.85652633273721e-55 | 7                  | TCEAL8  | GC    |  |  |  |
| 1.13556031252328e-59 | 0.332154258346286  | 0.136   | 0.037 |  |  |  |
| 2.02459048119775e-55 | 7                  | DENND6B | GC    |  |  |  |
| 2.50169726909724e-59 | 0.482842742887663  | 0.313   | 0.142 |  |  |  |
| 4.46027606107346e-55 | 7                  | SMARCA4 | GC    |  |  |  |
| 3.93569327165415e-59 | 0.324137107059488  | 0.119   | 0.03  |  |  |  |
| 7.01694753403219e-55 | 7                  | PDGFD   | GC    |  |  |  |
| 5.20769685690586e-59 | 0.339924165360974  | 0.805   | 0.61  |  |  |  |
| 9.28480272617746e-55 | 7                  | NDUFA13 | GC    |  |  |  |
| 6.71461865462043e-59 | -0.613303372487972 | 0.049   | 0.176 |  |  |  |
| 1.19714935993228e-54 | 7                  | BCL2    | GC    |  |  |  |
| 1.0116895422572e-58  | 0.362864048681685  | 0.157   | 0.049 |  |  |  |
| 1.80374128489036e-54 | 7                  | CDKN2C  | GC    |  |  |  |
| 1.14398618721877e-58 | 0.379735614588919  | 0.153   | 0.038 |  |  |  |
| 2.03961297319235e-54 | 7                  | IGF2BP3 | GC    |  |  |  |
| 1.29577776565824e-58 | 0.446766305822293  | 0.479   | 0.266 |  |  |  |
| 2.31024217839208e-54 | 7                  | RNF7    | GC    |  |  |  |
| 1.40019950311629e-58 | 0.496971819486059  | 0.366   | 0.171 |  |  |  |
| 2.49641569410604e-54 | 7                  | MTERF4  | GC    |  |  |  |
| 1.46511123229695e-58 | 0.448769042696726  | 0.294   | 0.12  |  |  |  |
| 2.61214681606222e-54 | 7                  | COMMD4  | GC    |  |  |  |
| 2.30780088178199e-58 | -0.787544387387854 | 0.215   | 0.387 |  |  |  |
| 4.11457819212911e-54 | 7                  | PDCD4   | GC    |  |  |  |
| 2.59251239767864e-58 | 0.426916007490356  | 0.58    | 0.337 |  |  |  |
| 4.62219035382125e-54 | 7                  | H2AFY   | GC    |  |  |  |
| 4.16964863847846e-58 | 0.46130125485969   | 0.606   | 0.377 |  |  |  |
| 7.43406655754324e-54 | 7                  | NDUFB3  | GC    |  |  |  |
| 5.03539446586481e-58 | 0.483249632772131  | 0.374   | 0.183 |  |  |  |
| 8.97760479319037e-54 | 7                  | LBR     | GC    |  |  |  |
| 5.07911770983081e-58 | 0.436954794988023  | 0.647   | 0.41  |  |  |  |
| 9.05555896485735e-54 | 7                  | HNRNPD  | GC    |  |  |  |
| 5.25383218132476e-58 | 0.436457262826028  | 0.558   | 0.349 |  |  |  |
| 9.36705739608391e-54 | 7                  | POLR1D  | GC    |  |  |  |
| 5.33504509647664e-58 | 0.370505941946617  | 0.71    | 0.496 |  |  |  |
| 9.51185190250819e-54 | 7                  | EIF3I   | GC    |  |  |  |
| 8.87942688778978e-58 | -0.325713371530302 | 1       | 1     |  |  |  |
| 1.58311301982404e-53 | 7                  | RPL41   | GC    |  |  |  |
| 1.07720757721287e-57 | 0.434490333786803  | 0.506   | 0.295 |  |  |  |
| 1.92055338941283e-53 | 7                  | UGP2    | GC    |  |  |  |
| 1.10529444449468e-57 | -0.755421492142277 | 0.143   | 0.273 |  |  |  |
| 1.97062946508957e-53 | 7                  | JUN     | GC    |  |  |  |
| 2.21519814448452e-57 | 0.447570784495831  | 0.327   | 0.149 |  |  |  |
| 3.94947677180145e-53 | 7                  | ACAP2   | GC    |  |  |  |
| 2.23942039219396e-57 | 0.446924196579344  | 0.303   | 0.134 |  |  |  |
| 3.99266261724261e-53 | 7                  | COR01B  | GC    |  |  |  |
| 2.30435815066765e-57 | 0.455831396262703  | 0.385   | 0.189 |  |  |  |

|                      |   |           |    |                        |             |
|----------------------|---|-----------|----|------------------------|-------------|
| 4.10844014682535e-53 | 7 | UBE2E1    | GC |                        |             |
| 2.45611588171571e-57 |   |           |    | -0.771907355253998     | 0.263 0.42  |
| 4.37900900551093e-53 | 7 | NPC2      | GC |                        |             |
| 2.90181666095514e-57 |   |           |    | 0.395802618512733      | 0.196 0.077 |
| 5.17364892481693e-53 | 7 | GPR160    | GC |                        |             |
| 3.52592256749985e-57 |   |           |    | -0.72890704261342      | 0.186 0.325 |
| 6.28636734559548e-53 | 7 | TUBA1A    | GC |                        |             |
| 1.03419028203941e-56 |   |           |    | 0.464265515306655      | 0.518 0.308 |
| 1.84385785384807e-52 | 7 | SCAND1    | GC |                        |             |
| 1.44993756638711e-56 |   |           |    | -0.782603511006 0.174  | 0.302       |
| 2.58509368711158e-52 | 7 | LINC00926 | GC |                        |             |
| 2.22108668304198e-56 |   |           |    | 0.43407123486744 0.474 | 0.27        |
| 3.95997544719554e-52 | 7 | CNIH1     | GC |                        |             |
| 2.23360106388923e-56 |   |           |    | 0.379299359357072      | 0.201 0.07  |
| 3.9822873368081e-52  | 7 | CUX1      | GC |                        |             |
| 2.45802837764846e-56 |   |           |    | 0.419625339479107      | 0.465 0.267 |
| 4.38241879450945e-52 | 7 | SEPT2     | GC |                        |             |
| 2.9241391149724e-56  |   |           |    | -0.753002487471302     | 0.032 0.164 |
| 5.21344762808429e-52 | 7 | LMNA      | GC |                        |             |
| 4.01364188786499e-56 |   |           |    | 0.432120546179281      | 0.268 0.111 |
| 7.1559221218745e-52  | 7 | CHMP7     | GC |                        |             |
| 4.45805141189436e-56 |   |           |    | -0.367719514429124     | 0.999 0.999 |
| 7.94825986226645e-52 | 7 | PTMA      | GC |                        |             |
| 4.5635831204212e-56  |   |           |    | 0.416731065943361      | 0.209 0.072 |
| 8.13641234539896e-52 | 7 | KLHL6     | GC |                        |             |
| 4.85824602687219e-56 |   |           |    | 0.371620361315008      | 0.174 0.059 |
| 8.66176684131043e-52 | 7 | FAM129A   | GC |                        |             |
| 6.37896657432706e-56 |   |           |    | -0.77188475549635      | 0.224 0.358 |
| 1.13730595053677e-51 | 7 | TUBB4B    | GC |                        |             |
| 6.83128293948121e-56 |   |           |    | 0.41151873530409 0.472 | 0.269       |
| 1.21794943528011e-51 | 7 | TANK      | GC |                        |             |
| 2.47686749642205e-55 |   |           |    | 0.449317890401365      | 0.259 0.107 |
| 4.41600705937087e-51 | 7 | BRI3BP    | GC |                        |             |
| 2.62356144119013e-55 |   |           |    | 0.438306977695226      | 0.281 0.123 |
| 4.67754769349788e-51 | 7 | DNAJB2    | GC |                        |             |
| 2.82187182824087e-55 |   |           |    | -0.329954381166222     | 1 0.999     |
| 5.03111528257065e-51 | 7 | RPLP1     | GC |                        |             |
| 3.87688943311645e-55 |   |           |    | 0.467913577101009      | 0.315 0.146 |
| 6.91210617030332e-51 | 7 | MAD1L1    | GC |                        |             |
| 5.60355185479511e-55 |   |           |    | 0.415617966303199      | 0.635 0.394 |
| 9.9905726019142e-51  | 7 | STX7      | GC |                        |             |
| 7.96922878237334e-55 |   |           |    | 0.344352935354012      | 0.183 0.067 |
| 1.42083379960934e-50 | 7 | NEK6      | GC |                        |             |
| 8.69717760605429e-55 |   |           |    | 0.402672779441544      | 0.224 0.082 |
| 1.55061979538342e-50 | 7 | PTK2B     | GC |                        |             |
| 9.0909015212992e-55  |   |           |    | 0.436978938884933      | 0.265 0.111 |
| 1.62081683223244e-50 | 7 | KLHL5     | GC |                        |             |
| 1.07557234075457e-54 |   |           |    | 0.370381654704637      | 0.714 0.508 |
| 1.91763792633132e-50 | 7 | CAPZB     | GC |                        |             |
| 1.61589544155717e-54 |   |           |    | 0.42411658401681 0.212 | 0.072       |

|                      |                    |          |    |       |       |
|----------------------|--------------------|----------|----|-------|-------|
| 2.88097998275227e-50 | 7                  | LM02     | GC |       |       |
| 1.8003129965317e-54  | 0.393483952197401  |          |    | 0.224 | 0.082 |
| 3.20977804151637e-50 | 7                  | DENND2D  | GC |       |       |
| 1.9031971957732e-54  | 0.436093703824523  |          |    | 0.714 | 0.499 |
| 3.39321028034404e-50 | 7                  | MZT2B    | GC |       |       |
| 2.95653308099741e-54 | 0.395784815473514  |          |    | 0.573 | 0.359 |
| 5.27120283011028e-50 | 7                  | EWSR1    | GC |       |       |
| 3.22679354004877e-54 | 0.372631713602908  |          |    | 0.185 | 0.062 |
| 5.75305020255295e-50 | 7                  | TEX9     | GC |       |       |
| 3.49154557824722e-54 | 0.319897237007241  |          |    | 0.885 | 0.709 |
| 6.22507661145697e-50 | 7                  | HMG2     | GC |       |       |
| 3.71642572695964e-54 | 0.405644087627326  |          |    | 0.341 | 0.171 |
| 6.62601542859634e-50 | 7                  | TRAPPC6A | GC |       |       |
| 4.00098408918366e-54 | 0.44588243126116   | 0.244    |    | 0.098 |       |
| 7.13335453260554e-50 | 7                  | OTULIN   | GC |       |       |
| 4.05408867617433e-54 | 0.346759389207153  |          |    | 0.769 | 0.571 |
| 7.22803470075121e-50 | 7                  | COPE     | GC |       |       |
| 5.94317170628049e-54 | -0.395677298656341 |          |    | 0.999 | 0.999 |
| 1.05960808351275e-49 | 7                  | RPL34    | GC |       |       |
| 2.17513067212304e-53 | 0.388056566947213  |          |    | 0.231 | 0.091 |
| 3.87804047532817e-49 | 7                  | RAD17    | GC |       |       |
| 5.12608513024582e-53 | 0.444442436241253  |          |    | 0.263 | 0.111 |
| 9.13929717871528e-49 | 7                  | BRWD1    | GC |       |       |
| 6.18994949343755e-53 | 0.359498034172797  |          |    | 0.696 | 0.481 |
| 1.10360609518498e-48 | 7                  | CBX3     | GC |       |       |
| 7.39764867698807e-53 | 0.38714973443772   | 0.699    |    | 0.486 |       |
| 1.3189267826202e-48  | 7                  | ARL6IP4  | GC |       |       |
| 9.53938133696717e-53 | 0.361210713337153  |          |    | 0.78  | 0.576 |
| 1.70077629856788e-48 | 7                  | NDUFB2   | GC |       |       |
| 1.3541212357969e-52  | 0.386808560368214  |          |    | 0.37  | 0.199 |
| 2.41426275130229e-48 | 7                  | ARL2BP   | GC |       |       |
| 1.51727663502818e-52 | 0.344613193681192  |          |    | 0.167 | 0.054 |
| 2.70515251259174e-48 | 7                  | SLC15A4  | GC |       |       |
| 1.84816688162409e-52 | 0.314711394632794  |          |    | 0.824 | 0.633 |
| 3.29509673324759e-48 | 7                  | ERH      | GC |       |       |
| 2.21592016114004e-52 | 0.382856004495026  |          |    | 0.796 | 0.62  |
| 3.95076405529659e-48 | 7                  | ATP5P0   | GC |       |       |
| 2.2278564132955e-52  | 0.441560405145127  |          |    | 0.295 | 0.121 |
| 3.97204519926454e-48 | 7                  | STAP1    | GC |       |       |
| 2.24490157564814e-52 | 0.373451278267795  |          |    | 0.748 | 0.547 |
| 4.00243501922307e-48 | 7                  | NEDD8    | GC |       |       |
| 3.65449614962851e-52 | 0.392773478002838  |          |    | 0.618 | 0.402 |
| 6.51560118517268e-48 | 7                  | EID1     | GC |       |       |
| 4.5543070172362e-52  | 0.401333036594744  |          |    | 0.512 | 0.325 |
| 8.11987398103042e-48 | 7                  | EIF3A    | GC |       |       |
| 4.80694943600662e-52 | 0.392915383271853  |          |    | 0.612 | 0.404 |
| 8.57031014945621e-48 | 7                  | MOB1A    | GC |       |       |
| 5.45266910985774e-52 | 0.430199889967298  |          |    | 0.416 | 0.223 |
| 9.72156375596537e-48 | 7                  | SEPT1    | GC |       |       |
| 5.62692226206427e-52 | -0.386297409938119 |          |    | 0.994 | 0.996 |

|                      |                    |           |    |       |       |
|----------------------|--------------------|-----------|----|-------|-------|
| 1.00322397010344e-47 | 7                  | RPL35A    | GC |       |       |
| 9.10998527070621e-52 | 0.374353982855206  |           |    | 0.755 | 0.559 |
| 1.62421927391421e-47 | 7                  | RAC1      | GC |       |       |
| 2.47609046552813e-51 | 0.349397940359639  |           |    | 0.751 | 0.548 |
| 4.4146216909901e-47  | 7                  | SNU13     | GC |       |       |
| 2.96497765700931e-51 | -0.378106696256324 |           |    | 0.999 | 0.999 |
| 5.28625866468189e-47 | 7                  | RPL32     | GC |       |       |
| 3.17189124730476e-51 | 0.447968949216703  |           |    | 0.499 | 0.289 |
| 5.65516490481966e-47 | 7                  | PDHB      | GC |       |       |
| 3.70116938741611e-51 | 0.406461485129252  |           |    | 0.252 | 0.107 |
| 6.59881490082419e-47 | 7                  | ZNF296    | GC |       |       |
| 4.58907136802993e-51 | -0.430837911574342 |           |    | 0.997 | 0.998 |
| 8.18185534206055e-47 | 7                  | RPL11     | GC |       |       |
| 1.53919459945087e-50 | 0.417351985918247  |           |    | 0.345 | 0.18  |
| 2.74423005136096e-46 | 7                  | CLINT1    | GC |       |       |
| 2.60905390487087e-50 | 0.397897508101713  |           |    | 0.157 | 0.041 |
| 4.65168220699428e-46 | 7                  | EML6      | GC |       |       |
| 2.73178149249902e-50 | 0.429062199949153  |           |    | 0.549 | 0.312 |
| 4.8704932229765e-46  | 7                  | TNFRSF13C | GC |       |       |
| 3.43475195105059e-50 | 0.369766862708042  |           |    | 0.731 | 0.523 |
| 6.1238192535281e-46  | 7                  | PAIP2     | GC |       |       |
| 4.11611308411899e-50 | -0.373546075811086 |           |    | 0.994 | 0.995 |
| 7.33861801767575e-46 | 7                  | RPS25     | GC |       |       |
| 6.07015699158822e-50 | 0.430867562967486  |           |    | 0.323 | 0.146 |
| 1.08224829003026e-45 | 7                  | MYL6B     | GC |       |       |
| 6.99703847451105e-50 | 0.326545140908076  |           |    | 0.15  | 0.043 |
| 1.24750198962058e-45 | 7                  | GRAP      | GC |       |       |
| 7.41981554443943e-50 | 0.346389594646661  |           |    | 0.14  | 0.039 |
| 1.32287891341811e-45 | 7                  | IKBKE     | GC |       |       |
| 7.74484130582835e-50 | 0.407757898079559  |           |    | 0.283 | 0.125 |
| 1.38082775641614e-45 | 7                  | C16orf87  | GC |       |       |
| 1.10962138344473e-49 | 0.417322201053986  |           |    | 0.394 | 0.22  |
| 1.9783439645436e-45  | 7                  | PLEKHJ1   | GC |       |       |
| 1.16605171069365e-49 | 0.420096794069375  |           |    | 0.448 | 0.259 |
| 2.0789535949957e-45  | 7                  | PPP1R7    | GC |       |       |
| 1.17847187976538e-49 | 0.455954418652734  |           |    | 0.342 | 0.176 |
| 2.1010975144337e-45  | 7                  | TRABD     | GC |       |       |
| 1.18511620495867e-49 | 0.435031393416526  |           |    | 0.471 | 0.278 |
| 2.11294368182081e-45 | 7                  | GSTK1     | GC |       |       |
| 1.19227595759456e-49 | 0.388036206803072  |           |    | 0.816 | 0.653 |
| 2.12570880479535e-45 | 7                  | UBL5      | GC |       |       |
| 1.82423907494702e-49 | 0.353696743106035  |           |    | 0.707 | 0.507 |
| 3.25243584672304e-45 | 7                  | SRP9      | GC |       |       |
| 1.993996156868e-49   | -0.397891901611471 |           |    | 0.998 | 0.999 |
| 3.55509574807996e-45 | 7                  | RPL39     | GC |       |       |
| 2.0018732187086e-49  | 0.403871094339756  |           |    | 0.289 | 0.128 |
| 3.56913976163556e-45 | 7                  | CERS4     | GC |       |       |
| 2.01961175666981e-49 | 0.353672666433482  |           |    | 0.685 | 0.481 |
| 3.6007658009666e-45  | 7                  | EIF3M     | GC |       |       |
| 2.35276571320635e-49 | 0.468262803690627  |           |    | 0.346 | 0.153 |

|                      |                    |              |       |       |
|----------------------|--------------------|--------------|-------|-------|
| 4.19474599007561e-45 | 7                  | C12orf75 GC  |       |       |
| 3.49083229703721e-49 | 0.443004700809082  |              | 0.645 | 0.41  |
| 6.22380490238764e-45 | 7                  | NDUFA12 GC   |       |       |
| 4.39487722542066e-49 | 0.360810552659187  |              | 0.19  | 0.074 |
| 7.8356266052025e-45  | 7                  | WEE1 GC      |       |       |
| 6.84830540490068e-49 | 0.373593867485929  |              | 0.2   | 0.07  |
| 1.22098437063974e-44 | 7                  | TMED8 GC     |       |       |
| 6.87918564062672e-49 | 0.382282401655157  |              | 0.388 | 0.199 |
| 1.22649000786734e-44 | 7                  | ARHGEF1 GC   |       |       |
| 7.68221615526666e-49 | 0.337145664827964  |              | 0.659 | 0.448 |
| 1.36966231832249e-44 | 7                  | PPP4C GC     |       |       |
| 1.12094375485598e-48 | 0.395611068304014  |              | 0.216 | 0.086 |
| 1.99853062053272e-44 | 7                  | RITA1 GC     |       |       |
| 1.26169561368231e-48 | 0.430808236590041  |              | 0.478 | 0.259 |
| 2.24947710963418e-44 | 7                  | HHEX GC      |       |       |
| 1.27814674763533e-48 | 0.405072601239397  |              | 0.268 | 0.114 |
| 2.27880783635904e-44 | 7                  | CD180 GC     |       |       |
| 1.29292433203054e-48 | -0.962753752838512 |              | 0.275 | 0.414 |
| 2.30515479157726e-44 | 7                  | TXN GC       |       |       |
| 2.00786708645618e-48 | 0.360556572215827  |              | 0.802 | 0.613 |
| 3.57982622844272e-44 | 7                  | NDUFA1 GC    |       |       |
| 2.13624726716336e-48 | 0.413480760108787  |              | 0.509 | 0.315 |
| 3.80871525262556e-44 | 7                  | GNB2 GC      |       |       |
| 2.25532739055428e-48 | 0.397534089506093  |              | 0.45  | 0.246 |
| 4.02102320461923e-44 | 7                  | ZCCHC10 GC   |       |       |
| 2.94089186942782e-48 | 0.392471179229936  |              | 0.443 | 0.259 |
| 5.24331611400286e-44 | 7                  | GRN GC       |       |       |
| 3.82579675260376e-48 | 0.368238021594814  |              | 0.162 | 0.065 |
| 6.82101303021725e-44 | 7                  | EYA3 GC      |       |       |
| 3.91894406730032e-48 | 0.332308008950027  |              | 0.71  | 0.489 |
| 6.98708537758974e-44 | 7                  | COX5A GC     |       |       |
| 7.58396619961107e-48 | 0.375246087264372  |              | 0.638 | 0.413 |
| 1.35214533372866e-43 | 7                  | TMEM123 GC   |       |       |
| 8.36002556769198e-48 | 0.416704076766168  |              | 0.154 | 0.044 |
| 1.4905089584638e-43  | 7                  | HES6 GC      |       |       |
| 9.16387515656915e-48 | 0.359948175026623  |              | 0.182 | 0.071 |
| 1.63382730166471e-43 | 7                  | EZH2 GC      |       |       |
| 1.31968297615663e-47 | 0.385408580878073  |              | 0.635 | 0.415 |
| 2.35286277818965e-43 | 7                  | GABARAPL2 GC |       |       |
| 1.6892780210015e-47  | 0.335774245892775  |              | 0.679 | 0.46  |
| 3.01181378364357e-43 | 7                  | PRDX5 GC     |       |       |
| 1.7085531509786e-47  | 0.39713717980287   | 0.423        | 0.245 |       |
| 3.04617941287975e-43 | 7                  | MCTS1 GC     |       |       |
| 2.13913329959955e-47 | 0.354167833502282  |              | 0.631 | 0.427 |
| 3.81386075985604e-43 | 7                  | KHDRBS1 GC   |       |       |
| 2.59223622272376e-47 | 0.396746915724936  |              | 0.25  | 0.106 |
| 4.62169796149419e-43 | 7                  | TRAC GC      |       |       |
| 3.13428170836538e-47 | -0.617162311502536 |              | 0.894 | 0.917 |
| 5.58811085784464e-43 | 7                  | EEF1B2 GC    |       |       |
| 7.34899065007187e-47 | 0.3432425490963    | 0.706        | 0.516 |       |

|                      |                    |           |       |  |  |  |
|----------------------|--------------------|-----------|-------|--|--|--|
| 1.31025154300131e-42 | 7                  | NDUFB8    | GC    |  |  |  |
| 8.06570149562517e-47 | 0.33213321857942   | 0.196     | 0.068 |  |  |  |
| 1.43803391965501e-42 | 7                  | DHTKD1    | GC    |  |  |  |
| 8.36022944307726e-47 | 0.325368325213004  | 0.149     | 0.045 |  |  |  |
| 1.49054530740624e-42 | 7                  | ATP8A1    | GC    |  |  |  |
| 8.47914749084261e-47 | 0.312150789855348  | 0.143     | 0.042 |  |  |  |
| 1.51174720614233e-42 | 7                  | LINC00467 | GC    |  |  |  |
| 9.44232426181869e-47 | 0.383389069760848  | 0.575     | 0.383 |  |  |  |
| 1.68347199263965e-42 | 7                  | ARPC4     | GC    |  |  |  |
| 1.18264853298426e-46 | 0.385004522455649  | 0.561     | 0.349 |  |  |  |
| 2.10854406945763e-42 | 7                  | GNAS      | GC    |  |  |  |
| 1.76750279606545e-46 | 0.323129020760878  | 0.147     | 0.045 |  |  |  |
| 3.15128073510509e-42 | 7                  | MYL5      | GC    |  |  |  |
| 1.82083993057629e-46 | 0.375220267199693  | 0.509     | 0.305 |  |  |  |
| 3.24637551222446e-42 | 7                  | ATP2B1    | GC    |  |  |  |
| 1.98392919529374e-46 | 0.398613744458179  | 0.229     | 0.094 |  |  |  |
| 3.5371473622892e-42  | 7                  | SYVN1     | GC    |  |  |  |
| 1.99514032241448e-46 | -0.629922524553803 | 0.12      | 0.246 |  |  |  |
| 3.55713568083278e-42 | 7                  | PHACTR1   | GC    |  |  |  |
| 3.66185393036372e-46 | -0.467271666872682 | 0.027     | 0.116 |  |  |  |
| 6.52871937244547e-42 | 7                  | P2RY10    | GC    |  |  |  |
| 3.70469546018554e-46 | -0.330580530273974 | 0.999     | 0.999 |  |  |  |
| 6.6051015359648e-42  | 7                  | RPS19     | GC    |  |  |  |
| 4.34587065359381e-46 | 0.321746801553525  | 0.626     | 0.422 |  |  |  |
| 7.74825278829241e-42 | 7                  | KTN1      | GC    |  |  |  |
| 4.53505989026911e-46 | 0.384021308751269  | 0.21      | 0.077 |  |  |  |
| 8.08555827836079e-42 | 7                  | GPR18     | GC    |  |  |  |
| 7.30702342513082e-46 | 0.38768229087823   | 0.36      | 0.191 |  |  |  |
| 1.30276920646657e-41 | 7                  | ETFB      | GC    |  |  |  |
| 7.48399180096137e-46 | 0.336751427238002  | 0.732     | 0.538 |  |  |  |
| 1.3343208981934e-41  | 7                  | UBE2D2    | GC    |  |  |  |
| 9.9826582058963e-46  | 0.378152071143803  | 0.47      | 0.301 |  |  |  |
| 1.77980813152925e-41 | 7                  | FERMT3    | GC    |  |  |  |
| 1.31193797332152e-45 | 0.397300279736104  | 0.403     | 0.222 |  |  |  |
| 2.33905421263495e-41 | 7                  | NGLY1     | GC    |  |  |  |
| 1.33036717893331e-45 | 0.389075166782141  | 0.512     | 0.311 |  |  |  |
| 2.3719116433202e-41  | 7                  | PRDX2     | GC    |  |  |  |
| 1.39550078668207e-45 | 0.359390417705696  | 0.526     | 0.337 |  |  |  |
| 2.48803835257546e-41 | 7                  | SNX17     | GC    |  |  |  |
| 1.51756286982178e-45 | -0.599342473568851 | 0.329     | 0.455 |  |  |  |
| 2.70566284060526e-41 | 7                  | DRAP1     | GC    |  |  |  |
| 1.61192344772958e-45 | -0.522795006189631 | 0.085     | 0.198 |  |  |  |
| 2.87389831495706e-41 | 7                  | HSPB1     | GC    |  |  |  |
| 1.71866385888283e-45 | 0.321501218279599  | 0.162     | 0.054 |  |  |  |
| 3.0642057940022e-41  | 7                  | KIF3A     | GC    |  |  |  |
| 1.85702704224676e-45 | -0.473119535122275 | 0.981     | 0.974 |  |  |  |
| 3.31089351362175e-41 | 7                  | MT-ND4    | GC    |  |  |  |
| 2.68653010710502e-45 | -0.926162519888831 | 0.524     | 0.579 |  |  |  |
| 4.78981452795755e-41 | 7                  | TUBB      | GC    |  |  |  |
| 2.89273847591901e-45 | 0.392343985908462  | 0.348     | 0.166 |  |  |  |

|                      |                    |          |    |       |       |
|----------------------|--------------------|----------|----|-------|-------|
| 5.157463428716e-41   | 7                  | BLCAP    | GC |       |       |
| 3.72143808695644e-45 | 0.365953884823488  |          |    | 0.189 | 0.07  |
| 6.63495196523463e-41 | 7                  | PAG1     | GC |       |       |
| 3.99120811149656e-45 | 0.328816852280351  |          |    | 0.176 | 0.063 |
| 7.11592494198722e-41 | 7                  | ST20     | GC |       |       |
| 4.57325113720494e-45 | 0.329253414355542  |          |    | 0.687 | 0.488 |
| 8.15364945252268e-41 | 7                  | ARGLU1   | GC |       |       |
| 5.31485436180842e-45 | 0.370528777704408  |          |    | 0.666 | 0.448 |
| 9.47585384166823e-41 | 7                  | COX17    | GC |       |       |
| 8.01163424809568e-45 | 0.403900416674742  |          |    | 0.372 | 0.179 |
| 1.42839427009298e-40 | 7                  | CDC7L    | GC |       |       |
| 9.26777381305734e-45 | 0.381657715983346  |          |    | 0.407 | 0.223 |
| 1.65235139312999e-40 | 7                  | OAZ2     | GC |       |       |
| 1.04152369598166e-44 | 0.407389365200924  |          |    | 0.47  | 0.27  |
| 1.85693259756569e-40 | 7                  | PIM2     | GC |       |       |
| 1.13771530643423e-44 | -0.451138169389978 |          |    | 0.019 | 0.112 |
| 2.02843261984159e-40 | 7                  | SNX9     | GC |       |       |
| 1.81819116361187e-44 | -0.640486054208785 |          |    | 0.21  | 0.334 |
| 3.24165302560361e-40 | 7                  | SMC6     | GC |       |       |
| 2.52626530175056e-44 | 0.423325939093518  |          |    | 0.399 | 0.199 |
| 4.50407840649107e-40 | 7                  | C16orf74 | GC |       |       |
| 2.73470495845161e-44 | 0.421884233829735  |          |    | 0.349 | 0.183 |
| 4.87570547042337e-40 | 7                  | RFC1     | GC |       |       |
| 4.89055476934328e-44 | 0.317960550999402  |          |    | 0.688 | 0.495 |
| 8.71937009826214e-40 | 7                  | NDUFA11  | GC |       |       |
| 4.96435446963303e-44 | 0.388132842749008  |          |    | 0.475 | 0.29  |
| 8.85094758390872e-40 | 7                  | WASF2    | GC |       |       |
| 7.6701331041018e-44  | 0.422085898587304  |          |    | 0.397 | 0.217 |
| 1.36750803113031e-39 | 7                  | SIAH2    | GC |       |       |
| 9.44909408342744e-44 | -0.457413881279178 |          |    | 0.021 | 0.104 |
| 1.68467898413428e-39 | 7                  | RHOC     | GC |       |       |
| 1.22306978546365e-43 | 0.354743925884358  |          |    | 0.406 | 0.233 |
| 2.18061112050315e-39 | 7                  | CPSF6    | GC |       |       |
| 1.40264561586924e-43 | 0.371587316144561  |          |    | 0.558 | 0.37  |
| 2.50077686853327e-39 | 7                  | SUPT4H1  | GC |       |       |
| 1.96264887588268e-43 | 0.414380633893536  |          |    | 0.376 | 0.222 |
| 3.49920668081123e-39 | 7                  | DDX54    | GC |       |       |
| 2.20614108323118e-43 | 0.338011809839141  |          |    | 0.21  | 0.09  |
| 3.93332893729287e-39 | 7                  | TUT7     | GC |       |       |
| 3.99077276117206e-43 | 0.318148632627326  |          |    | 0.148 | 0.045 |
| 7.11514875589366e-39 | 7                  | SYNE1    | GC |       |       |
| 4.26829158594048e-43 | 0.397336738246555  |          |    | 0.404 | 0.226 |
| 7.60993706857329e-39 | 7                  | AKAP13   | GC |       |       |
| 4.67618391440495e-43 | 0.350384954129561  |          |    | 0.575 | 0.381 |
| 8.33716830099259e-39 | 7                  | CUTA     | GC |       |       |
| 4.94423879407922e-43 | 0.315573931853997  |          |    | 0.869 | 0.729 |
| 8.81508334596384e-39 | 7                  | SKP1     | GC |       |       |
| 5.41397879778072e-43 | 0.367570133012683  |          |    | 0.243 | 0.099 |
| 9.65258279856325e-39 | 7                  | RHBDF2   | GC |       |       |
| 6.36377898466053e-43 | 0.397943905288703  |          |    | 0.488 | 0.301 |

|                      |                    |            |    |       |       |
|----------------------|--------------------|------------|----|-------|-------|
| 1.13459815517513e-38 | 7                  | FKBP3      | GC |       |       |
| 6.41839966004198e-43 | -0.62485330448701  |            |    | 0.24  | 0.367 |
| 1.14433647538889e-38 | 7                  | ANXA6      | GC |       |       |
| 9.73388898849614e-43 | 0.356352068189457  |            |    | 0.221 | 0.083 |
| 1.73545506775898e-38 | 7                  | VEZT       | GC |       |       |
| 9.94116849133471e-43 | 0.362745236663843  |            |    | 0.496 | 0.304 |
| 1.77241093032006e-38 | 7                  | MZT2A      | GC |       |       |
| 1.13219294623928e-42 | 0.353255615612667  |            |    | 0.291 | 0.14  |
| 2.01858680385001e-38 | 7                  | PTEN       | GC |       |       |
| 1.27417738947512e-42 | 0.327626345323308  |            |    | 0.115 | 0.031 |
| 2.27173086769519e-38 | 7                  | AC012368.1 | GC |       |       |
| 1.6998379418353e-42  | -0.56334655235427  |            |    | 0.121 | 0.246 |
| 3.03064106649815e-38 | 7                  | HLA-F      | GC |       |       |
| 1.75136699742161e-42 | 0.369824407215794  |            |    | 0.383 | 0.209 |
| 3.12251221970299e-38 | 7                  | DMAC1      | GC |       |       |
| 1.8645014310989e-42  | 0.384895884579701  |            |    | 0.396 | 0.221 |
| 3.32421960150623e-38 | 7                  | GTF2I      | GC |       |       |
| 1.96613299637715e-42 | -0.370563394243051 |            |    | 0.014 | 0.101 |
| 3.50541851924083e-38 | 7                  | PARVB      | GC |       |       |
| 2.26132277345006e-42 | 0.379128386472874  |            |    | 0.498 | 0.276 |
| 4.03171237278412e-38 | 7                  | CARHSP1    | GC |       |       |
| 2.8332234419975e-42  | 0.395930499719568  |            |    | 0.61  | 0.402 |
| 5.05135407473734e-38 | 7                  | SEPT6      | GC |       |       |
| 3.90097542647532e-42 | 0.370059787127144  |            |    | 0.474 | 0.302 |
| 6.95504908786284e-38 | 7                  | MMADHC     | GC |       |       |
| 5.14217084347683e-42 | 0.374179769880772  |            |    | 0.294 | 0.142 |
| 9.16797639683485e-38 | 7                  | ZNF580     | GC |       |       |
| 1.03935673171495e-41 | 0.401292149821101  |            |    | 0.432 | 0.247 |
| 1.85306911697458e-37 | 7                  | MPC2       | GC |       |       |
| 1.09517459448295e-41 | 0.42738148083588   | 0.249      |    | 0.113 |       |
| 1.95258678450365e-37 | 7                  | TBC1D1     | GC |       |       |
| 1.2269751908807e-41  | 0.412788946279988  |            |    | 0.392 | 0.235 |
| 2.1875740678212e-37  | 7                  | NSRP1      | GC |       |       |
| 1.94697091160627e-41 | 0.360657086972295  |            |    | 0.528 | 0.338 |
| 3.47125443830281e-37 | 7                  | POLR2J     | GC |       |       |
| 2.21036889477632e-41 | 0.323398657373643  |            |    | 0.193 | 0.078 |
| 3.94086670249671e-37 | 7                  | BPNT1      | GC |       |       |
| 2.2336368059483e-41  | 0.339647735200676  |            |    | 0.21  | 0.084 |
| 3.98235106132523e-37 | 7                  | TPST2      | GC |       |       |
| 2.25528426739041e-41 | 0.34392485074736   | 0.144      |    | 0.034 |       |
| 4.02094632033035e-37 | 7                  | MILR1      | GC |       |       |
| 2.73803531186891e-41 | 0.304989919913942  |            |    | 0.174 | 0.063 |
| 4.88164315753107e-37 | 7                  | SYT17      | GC |       |       |
| 4.97900443642434e-41 | 0.346472786353626  |            |    | 0.239 | 0.107 |
| 8.87706700970095e-37 | 7                  | HPS1       | GC |       |       |
| 8.5704319306609e-41  | 0.316751447463402  |            |    | 0.186 | 0.074 |
| 1.52802230891753e-36 | 7                  | FAM45A     | GC |       |       |
| 1.02191772298873e-40 | 0.315484714822196  |            |    | 0.163 | 0.064 |
| 1.82197710831661e-36 | 7                  | FUCA1      | GC |       |       |
| 1.40044024042422e-40 | 0.406156213037364  |            |    | 0.417 | 0.246 |



|                      |                    |         |       |  |  |  |
|----------------------|--------------------|---------|-------|--|--|--|
| 2.49684490465235e-36 | 7                  | RGS10   | GC    |  |  |  |
| 1.43183224653053e-40 | 0.3553500754813    | 0.331   | 0.187 |  |  |  |
| 2.55281371233928e-36 | 7                  | FYTTD1  | GC    |  |  |  |
| 1.46533832971133e-40 | 0.346110976555274  | 0.191   | 0.077 |  |  |  |
| 2.61255170804232e-36 | 7                  | VGLL4   | GC    |  |  |  |
| 1.48654308251334e-40 | 0.369435383471556  | 0.651   | 0.441 |  |  |  |
| 2.65035766181303e-36 | 7                  | HIGD2A  | GC    |  |  |  |
| 1.53863669207276e-40 | 0.355380797541579  | 0.435   | 0.262 |  |  |  |
| 2.74323535829653e-36 | 7                  | STMP1   | GC    |  |  |  |
| 1.82521433179619e-40 | 0.393965807598172  | 0.172   | 0.071 |  |  |  |
| 3.25417463215942e-36 | 7                  | ADAM17  | GC    |  |  |  |
| 1.87629447732898e-40 | 0.373179258330615  | 0.315   | 0.162 |  |  |  |
| 3.34524542362984e-36 | 7                  | TFDP1   | GC    |  |  |  |
| 2.37099865383314e-40 | -0.680380085534953 | 0.346   | 0.452 |  |  |  |
| 4.2272534999191e-36  | 7                  | PNRC1   | GC    |  |  |  |
| 2.48639456144185e-40 | -0.416287211113437 | 0.989   | 0.991 |  |  |  |
| 4.43299286359467e-36 | 7                  | RPL30   | GC    |  |  |  |
| 4.42611002034981e-40 | 0.333691533689002  | 0.251   | 0.117 |  |  |  |
| 7.89131155528168e-36 | 7                  | NOA1    | GC    |  |  |  |
| 4.76084267314335e-40 | 0.599221206612919  | 0.95    | 0.797 |  |  |  |
| 8.48810640194727e-36 | 7                  | RPS26   | GC    |  |  |  |
| 4.9446635506599e-40  | 0.364437902235839  | 0.442   | 0.252 |  |  |  |
| 8.81584064447153e-36 | 7                  | ILK     | GC    |  |  |  |
| 5.80722083274287e-40 | 0.332839659650247  | 0.468   | 0.278 |  |  |  |
| 1.03536940226973e-35 | 7                  | YPEL5   | GC    |  |  |  |
| 6.82665083282253e-40 | 0.364650367383836  | 0.267   | 0.122 |  |  |  |
| 1.21712357698393e-35 | 7                  | SASH3   | GC    |  |  |  |
| 7.36956111031885e-40 | 0.351300719359146  | 0.479   | 0.309 |  |  |  |
| 1.31391905035875e-35 | 7                  | WDR1    | GC    |  |  |  |
| 8.62208135178409e-40 | -0.363236087111884 | 0.99    | 0.993 |  |  |  |
| 1.53723088420959e-35 | 7                  | RPL35   | GC    |  |  |  |
| 9.27672332154379e-40 | 0.330401773331064  | 0.192   | 0.078 |  |  |  |
| 1.65394700099804e-35 | 7                  | N4BP3   | GC    |  |  |  |
| 1.58264314654171e-39 | 0.342600043303234  | 0.194   | 0.076 |  |  |  |
| 2.82169446596922e-35 | 7                  | SLC35E3 | GC    |  |  |  |
| 2.0452558517112e-39  | 0.302234127850666  | 0.682   | 0.483 |  |  |  |
| 3.6464866580159e-35  | 7                  | SF3B6   | GC    |  |  |  |
| 3.00542572244514e-39 | 0.340591144205655  | 0.401   | 0.237 |  |  |  |
| 5.35837352054744e-35 | 7                  | ETFA    | GC    |  |  |  |
| 3.02910533466792e-39 | 0.328890109121184  | 0.592   | 0.375 |  |  |  |
| 5.40059190117944e-35 | 7                  | EVL     | GC    |  |  |  |
| 3.20246798936234e-39 | 0.306481113180886  | 0.485   | 0.306 |  |  |  |
| 5.70968017823412e-35 | 7                  | LPXN    | GC    |  |  |  |
| 4.42730090000596e-39 | 0.372924219357301  | 0.228   | 0.092 |  |  |  |
| 7.89343477462063e-35 | 7                  | CCDC28B | GC    |  |  |  |
| 6.91461843790404e-39 | 0.345321865666775  | 0.454   | 0.269 |  |  |  |
| 1.23280732129391e-34 | 7                  | QARS    | GC    |  |  |  |
| 7.77346586349423e-39 | 0.356083614023782  | 0.486   | 0.289 |  |  |  |
| 1.38593122880239e-34 | 7                  | IFT57   | GC    |  |  |  |
| 9.88065323314445e-39 | 0.357802643428358  | 0.508   | 0.313 |  |  |  |

|                      |                    |          |    |       |       |
|----------------------|--------------------|----------|----|-------|-------|
| 1.76162166493732e-34 | 7                  | AP3S1    | GC |       |       |
| 9.90560219198105e-39 | -0.717019775219829 |          |    | 0.357 | 0.483 |
| 1.7660698148083e-34  | 7                  | SQSTM1   | GC |       |       |
| 1.06297860828595e-38 | 0.333279293451615  |          |    | 0.449 | 0.246 |
| 1.89518456071303e-34 | 7                  | TBC1D10C | GC |       |       |
| 1.42353619830564e-38 | 0.311493436514208  |          |    | 0.585 | 0.397 |
| 2.53802268795912e-34 | 7                  | PSMB2    | GC |       |       |
| 1.59382925360815e-38 | 0.36209317891826   | 0.376    |    | 0.211 |       |
| 2.84163817625796e-34 | 7                  | IFI27L2  | GC |       |       |
| 1.75941505634004e-38 | -0.64633730041006  |          |    | 0.389 | 0.496 |
| 3.13686110394867e-34 | 7                  | ANKRD12  | GC |       |       |
| 1.85257981922554e-38 | 0.445045954249209  |          |    | 0.32  | 0.152 |
| 3.30296455969721e-34 | 7                  | KIAA0040 | GC |       |       |
| 1.89993175903474e-38 | 0.333652747148928  |          |    | 0.36  | 0.201 |
| 3.38738833318304e-34 | 7                  | MRPS14   | GC |       |       |
| 1.95071879623785e-38 | 0.345811241953867  |          |    | 0.26  | 0.127 |
| 3.47793654181245e-34 | 7                  | PAPSS1   | GC |       |       |
| 1.99176401523206e-38 | -0.79986306207714  |          |    | 0.213 | 0.316 |
| 3.55111606275724e-34 | 7                  | HSP90B1  | GC |       |       |
| 2.85831587254995e-38 | 0.375651893600272  |          |    | 0.696 | 0.483 |
| 5.09609136916931e-34 | 7                  | RAC2     | GC |       |       |
| 2.95572828760821e-38 | 0.317060359998938  |          |    | 0.381 | 0.222 |
| 5.26976796397667e-34 | 7                  | SINHCAF  | GC |       |       |
| 3.00423934645759e-38 | 0.341467179855967  |          |    | 0.305 | 0.164 |
| 5.35625833079923e-34 | 7                  | MTX1     | GC |       |       |
| 3.01942178948017e-38 | 0.314507599543841  |          |    | 0.415 | 0.257 |
| 5.3833271084642e-34  | 7                  | CD2BP2   | GC |       |       |
| 3.16406297407548e-38 | 0.352931771521912  |          |    | 0.335 | 0.185 |
| 5.64120787647917e-34 | 7                  | NDUFA8   | GC |       |       |
| 3.55532504057621e-38 | 0.342742983706898  |          |    | 0.475 | 0.286 |
| 6.33878901484333e-34 | 7                  | BCL11A   | GC |       |       |
| 6.15952006537094e-38 | 0.303750632126944  |          |    | 0.709 | 0.51  |
| 1.09818083245498e-33 | 7                  | COX8A    | GC |       |       |
| 8.10960355355956e-38 | 0.317271711970015  |          |    | 0.622 | 0.418 |
| 1.44586121756413e-33 | 7                  | TAF7     | GC |       |       |
| 8.77049910097911e-38 | 0.328011504772512  |          |    | 0.421 | 0.251 |
| 1.56369228471357e-33 | 7                  | UPF3A    | GC |       |       |
| 9.21766220315238e-38 | 0.302542927446586  |          |    | 0.65  | 0.471 |
| 1.64341699420004e-33 | 7                  | GRB2     | GC |       |       |
| 5.39786003693965e-37 | -0.558873069004457 |          |    | 0.682 | 0.755 |
| 9.62384465985971e-33 | 7                  | HLA-C    | GC |       |       |
| 5.52897720348361e-37 | 0.315884093650685  |          |    | 0.662 | 0.486 |
| 9.85761345609093e-33 | 7                  | THRAP3   | GC |       |       |
| 5.85403429541711e-37 | -0.490732544197104 |          |    | 0.122 | 0.223 |
| 1.04371577452992e-32 | 7                  | CCDC50   | GC |       |       |
| 6.10968189769629e-37 | -0.352865893656992 |          |    | 0.999 | 0.999 |
| 1.08929518554027e-32 | 7                  | EEF1A1   | GC |       |       |
| 6.53843470656633e-37 | 0.334001097442421  |          |    | 0.483 | 0.303 |
| 1.16573752383371e-32 | 7                  | SCP2     | GC |       |       |
| 7.76487510303047e-37 | 0.314035100787294  |          |    | 0.136 | 0.047 |

|                      |                    |           |    |       |       |
|----------------------|--------------------|-----------|----|-------|-------|
| 1.3843995821193e-32  | 7                  | CPM       | GC |       |       |
| 7.81622964399267e-37 | 0.319056309721453  |           |    | 0.57  | 0.408 |
| 1.39355558322745e-32 | 7                  | HCLS1     | GC |       |       |
| 7.82515955180483e-37 | 0.32977857961258   |           |    | 0.294 | 0.16  |
| 1.39514769649128e-32 | 7                  | TOR3A     | GC |       |       |
| 7.8544880162862e-37  | 0.309244710651627  |           |    | 0.33  | 0.173 |
| 1.40037666842367e-32 | 7                  | TMC6      | GC |       |       |
| 1.0272858085702e-36  | 0.381281932682719  |           |    | 0.822 | 0.618 |
| 1.83154786809981e-32 | 7                  | HLA-DMB   | GC |       |       |
| 1.10145462591854e-36 | 0.349000891461788  |           |    | 0.765 | 0.596 |
| 1.96378345255017e-32 | 7                  | LSM7      | GC |       |       |
| 1.21117351112563e-36 | 0.345154671788998  |           |    | 0.3   | 0.153 |
| 2.15940125298589e-32 | 7                  | APLP2     | GC |       |       |
| 1.9344304885814e-36  | -0.597390875994838 |           |    | 0.22  | 0.332 |
| 3.44889611809178e-32 | 7                  | PTPN6     | GC |       |       |
| 2.10044417724777e-36 | 0.324512712364858  |           |    | 0.343 | 0.197 |
| 3.74488192361505e-32 | 7                  | URM1      | GC |       |       |
| 3.1765120007277e-36  | 0.33734785231527   |           |    | 0.448 | 0.278 |
| 5.66340324609741e-32 | 7                  | RTF2      | GC |       |       |
| 4.29012927412275e-36 | 0.345770118207163  |           |    | 0.284 | 0.15  |
| 7.64887148283345e-32 | 7                  | SVBP      | GC |       |       |
| 4.99326758846633e-36 | -0.599630540060748 |           |    | 0.155 | 0.241 |
| 8.90249678347662e-32 | 7                  | CD55      | GC |       |       |
| 5.17020339053834e-36 | -0.429481860837408 |           |    | 0.933 | 0.934 |
| 9.2179556249908e-32  | 7                  | MT-ATP6   | GC |       |       |
| 6.07772312586334e-36 | -0.437597725067735 |           |    | 0.024 | 0.108 |
| 1.08359725611018e-31 | 7                  | MTSS1     | GC |       |       |
| 6.12507427399646e-36 | 0.344176751133109  |           |    | 0.249 | 0.128 |
| 1.09203949231083e-31 | 7                  | SULF2     | GC |       |       |
| 6.72580608217849e-36 | 0.336225520115137  |           |    | 0.439 | 0.251 |
| 1.1991439663916e-31  | 7                  | CNN2      | GC |       |       |
| 6.82335196514102e-36 | 0.317600402875486  |           |    | 0.448 | 0.281 |
| 1.21653542186499e-31 | 7                  | NDUFB5    | GC |       |       |
| 1.08024286773769e-35 | 0.336266089446786  |           |    | 0.41  | 0.238 |
| 1.92596500888953e-31 | 7                  | TMEM134   | GC |       |       |
| 1.77154868756057e-35 | 0.344324867547256  |           |    | 0.368 | 0.2   |
| 3.15849415505174e-31 | 7                  | IKZF3     | GC |       |       |
| 2.46121764005975e-35 | 0.306014549338911  |           |    | 0.207 | 0.094 |
| 4.38810493046253e-31 | 7                  | RAB30-AS1 | GC |       |       |
| 3.5773352188575e-35  | 0.359826364456692  |           |    | 0.313 | 0.176 |
| 6.37803096170104e-31 | 7                  | MRPS33    | GC |       |       |
| 4.62923560060865e-35 | 0.307493243858784  |           |    | 0.357 | 0.216 |
| 8.25346415232517e-31 | 7                  | PSMD9     | GC |       |       |
| 5.1796137236531e-35  | 0.349831459620772  |           |    | 0.408 | 0.238 |
| 9.2347333079011e-31  | 7                  | DCTN3     | GC |       |       |
| 5.40185589986424e-35 | 0.390742957607936  |           |    | 0.29  | 0.134 |
| 9.63096888386796e-31 | 7                  | MKNK2     | GC |       |       |
| 5.67425154467292e-35 | -0.557381668124545 |           |    | 0.571 | 0.638 |
| 1.01166230789973e-30 | 7                  | GPX4      | GC |       |       |
| 7.10468096739358e-35 | 0.334424534829286  |           |    | 0.251 | 0.135 |

|                      |                    |           |    |       |       |
|----------------------|--------------------|-----------|----|-------|-------|
| 1.2666935696766e-30  | 7                  | MRPS27    | GC |       |       |
| 9.85428970955403e-35 | 0.326170858538395  |           |    | 0.53  | 0.36  |
| 1.75692131231639e-30 | 7                  | RPS19BP1  | GC |       |       |
| 1.01784175741222e-34 | 0.304154850043155  |           |    | 0.222 | 0.109 |
| 1.81471006929025e-30 | 7                  | COA1      | GC |       |       |
| 1.11487225045128e-34 | 0.314566515761691  |           |    | 0.509 | 0.331 |
| 1.98770573532959e-30 | 7                  | HSD17B10  | GC |       |       |
| 1.22925880514087e-34 | -0.386962896084144 |           |    | 0.026 | 0.118 |
| 2.19164552368565e-30 | 7                  | PYCR1     | GC |       |       |
| 1.8729008003935e-34  | 0.30311562376178   | 0.47      |    | 0.302 |       |
| 3.33919483702158e-30 | 7                  | PSMD6     | GC |       |       |
| 1.91022591170905e-34 | 0.320187054406065  |           |    | 0.223 | 0.105 |
| 3.40574177798606e-30 | 7                  | RAB11FIP1 | GC |       |       |
| 2.01890550384889e-34 | 0.31648727485916   | 0.33      |    | 0.195 |       |
| 3.59950662281219e-30 | 7                  | NDUFA7    | GC |       |       |
| 2.07497602896614e-34 | 0.310973737164934  |           |    | 0.485 | 0.309 |
| 3.69947476204373e-30 | 7                  | SFT2D1    | GC |       |       |
| 2.65425835483157e-34 | 0.309581043800369  |           |    | 0.406 | 0.241 |
| 4.7322772208292e-30  | 7                  | OTUB1     | GC |       |       |
| 2.66793318189891e-34 | 0.324696454672375  |           |    | 0.417 | 0.259 |
| 4.75665807000756e-30 | 7                  | MTCH2     | GC |       |       |
| 2.73835093350179e-34 | 0.320996314959866  |           |    | 0.29  | 0.156 |
| 4.88220587934034e-30 | 7                  | DCPS      | GC |       |       |
| 2.99916023786363e-34 | -0.560719827138957 |           |    | 0.052 | 0.14  |
| 5.34720278808706e-30 | 7                  | FCER2     | GC |       |       |
| 3.01262580053873e-34 | 0.328249158631793  |           |    | 0.612 | 0.439 |
| 5.3712105397805e-30  | 7                  | NDUFB10   | GC |       |       |
| 3.38759960425715e-34 | 0.357679605118506  |           |    | 0.186 | 0.068 |
| 6.03975133443008e-30 | 7                  | LINC01857 | GC |       |       |
| 3.6433062965212e-34  | 0.309982182995607  |           |    | 0.573 | 0.396 |
| 6.49565079606765e-30 | 7                  | MDH2      | GC |       |       |
| 4.10806572065805e-34 | 0.313774443419705  |           |    | 0.538 | 0.363 |
| 7.32427037336123e-30 | 7                  | FAM96B    | GC |       |       |
| 5.547968401259e-34   | -0.397558481002133 |           |    | 0.037 | 0.12  |
| 9.89147286260467e-30 | 7                  | SLAMF1    | GC |       |       |
| 5.91396750502564e-34 | 0.356896028453248  |           |    | 0.263 | 0.124 |
| 1.05440126647102e-29 | 7                  | ETS1      | GC |       |       |
| 6.92300427995414e-34 | 0.430815067690566  |           |    | 0.224 | 0.087 |
| 1.23430243307302e-29 | 7                  | FCRL2     | GC |       |       |
| 7.76900179822828e-34 | 0.323279914095458  |           |    | 0.522 | 0.34  |
| 1.38513533060612e-29 | 7                  | RBM17     | GC |       |       |
| 9.50533449838987e-34 | 0.330177113785509  |           |    | 0.524 | 0.347 |
| 1.69470608771793e-29 | 7                  | DGUOK     | GC |       |       |
| 9.93977607520734e-34 | -0.320658921074218 |           |    | 0.993 | 0.993 |
| 1.77216267644872e-29 | 7                  | RPS5      | GC |       |       |
| 1.00278237920962e-33 | 0.315441471809001  |           |    | 0.385 | 0.228 |
| 1.78786070389283e-29 | 7                  | MRPL27    | GC |       |       |
| 1.14912755577191e-33 | 0.314035441375286  |           |    | 0.232 | 0.115 |
| 2.04877951918574e-29 | 7                  | SS18      | GC |       |       |
| 1.1989187736641e-33  | -0.432215362842792 |           |    | 0.039 | 0.121 |

|                      |                    |          |    |       |       |       |
|----------------------|--------------------|----------|----|-------|-------|-------|
| 2.13755228156572e-29 | 7                  | FCGR2B   | GC |       |       |       |
| 1.66011247931191e-33 | 0.32380495337912   |          |    | 0.338 | 0.187 |       |
| 2.95981453936521e-29 | 7                  | RFXANK   | GC |       |       |       |
| 2.32370537448398e-33 | 0.314850500257155  |          |    |       | 0.47  | 0.307 |
| 4.1429343121675e-29  | 7                  | ZNF207   | GC |       |       |       |
| 2.81125685456674e-33 | 0.319514035535509  |          |    |       | 0.247 | 0.12  |
| 5.01218984600703e-29 | 7                  | ARL3     | GC |       |       |       |
| 2.82299508089087e-33 | 0.303685830631694  |          |    |       | 0.274 | 0.144 |
| 5.03311792972032e-29 | 7                  | MRPL10   | GC |       |       |       |
| 2.82308383546983e-33 | 0.319046811278863  |          |    |       | 0.374 | 0.22  |
| 5.03327617025916e-29 | 7                  | SREK1    | GC |       |       |       |
| 2.90198682690931e-33 | 0.316085213042103  |          |    |       | 0.606 | 0.415 |
| 5.1739523136966e-29  | 7                  | ECH1     | GC |       |       |       |
| 3.68462514132227e-33 | 0.329742953653442  |          |    |       | 0.498 | 0.317 |
| 6.56931816446348e-29 | 7                  | BLNK     | GC |       |       |       |
| 5.87453643194213e-33 | 0.342931531324693  |          |    |       | 0.419 | 0.25  |
| 1.04737110045096e-28 | 7                  | LYSMD2   | GC |       |       |       |
| 6.96027484679921e-33 | 0.328335280355311  |          |    |       | 0.512 | 0.34  |
| 1.24094740243583e-28 | 7                  | LAMTOR2  | GC |       |       |       |
| 8.03180645765612e-33 | 0.32461193654308   |          |    | 0.208 | 0.095 |       |
| 1.43199077333551e-28 | 7                  | TACC1    | GC |       |       |       |
| 1.22403187935213e-32 | -0.376748299024178 |          |    |       | 0.99  | 0.993 |
| 2.18232643769691e-28 | 7                  | RPL36    | GC |       |       |       |
| 1.24858687616938e-32 | -0.525704591923633 |          |    |       | 0.224 | 0.309 |
| 2.22610554152238e-28 | 7                  | ARHGAP24 | GC |       |       |       |
| 1.29047338367048e-32 | -0.643546242747264 |          |    |       | 0.184 | 0.282 |
| 2.3007849957461e-28  | 7                  | ADAM28   | GC |       |       |       |
| 2.27187578589567e-32 | 0.301831000645085  |          |    |       | 0.505 | 0.338 |
| 4.05052733867339e-28 | 7                  | MRPS34   | GC |       |       |       |
| 2.27425578911961e-32 | -0.532332440568302 |          |    |       | 0.061 | 0.161 |
| 4.05477064642135e-28 | 7                  | SLC2A3   | GC |       |       |       |
| 2.2988730283796e-32  | 0.342945430618658  |          |    |       | 0.352 | 0.201 |
| 4.09866072229799e-28 | 7                  | EBLN3P   | GC |       |       |       |
| 3.83193123637693e-32 | -0.368840665428242 |          |    |       | 0.048 | 0.123 |
| 6.83195020133643e-28 | 7                  | IL27RA   | GC |       |       |       |
| 4.2876977877197e-32  | 0.397447535773994  |          |    |       | 0.245 | 0.111 |
| 7.64453638572544e-28 | 7                  | GMDS     | GC |       |       |       |
| 5.53632185567284e-32 | 0.30585926530968   |          |    | 0.479 | 0.328 |       |
| 9.87070823647911e-28 | 7                  | NDUFS7   | GC |       |       |       |
| 9.90213616021805e-32 | 0.313238861058775  |          |    |       | 0.452 | 0.274 |
| 1.76545185600528e-27 | 7                  | JPT1     | GC |       |       |       |
| 9.95544947469503e-32 | 0.300169951163373  |          |    |       | 0.204 | 0.095 |
| 1.77495708684338e-27 | 7                  | KLC1     | GC |       |       |       |
| 1.89662703705066e-31 | 0.303821236332588  |          |    |       | 0.485 | 0.311 |
| 3.38149634435762e-27 | 7                  | SMIM26   | GC |       |       |       |
| 1.93155356167194e-31 | 0.315812393786768  |          |    |       | 0.401 | 0.24  |
| 3.4437668451049e-27  | 7                  | NBDY     | GC |       |       |       |
| 2.037783608292e-31   | 0.305532086959855  |          |    |       | 0.322 | 0.19  |
| 3.6331643952238e-27  | 7                  | INTS11   | GC |       |       |       |
| 2.11566365292949e-31 | -0.525663150860962 |          |    |       | 0.224 | 0.333 |

|                      |                    |            |    |       |       |
|----------------------|--------------------|------------|----|-------|-------|
| 3.77201672680798e-27 | 7                  | TRBC2      | GC |       |       |
| 2.33136575245276e-31 | 0.312557370088625  |            |    | 0.48  | 0.327 |
| 4.15659200004802e-27 | 7                  | BAX        | GC |       |       |
| 3.09951574372763e-31 | 0.337504972847176  |            |    | 0.28  | 0.138 |
| 5.52612661949198e-27 | 7                  | RAB30      | GC |       |       |
| 3.40308642334776e-31 | 0.348059329181783  |            |    | 0.495 | 0.302 |
| 6.06736278418671e-27 | 7                  | CALM3      | GC |       |       |
| 3.51574715174972e-31 | 0.333841136722844  |            |    | 0.211 | 0.097 |
| 6.26822559685458e-27 | 7                  | AC084033.3 | GC |       |       |
| 4.39568878266233e-31 | 0.414597917370102  |            |    | 0.104 | 0.024 |
| 7.83707353060867e-27 | 7                  | TCL1B      | GC |       |       |
| 5.51626388144829e-31 | -0.374526046134555 |            |    | 0.034 | 0.118 |
| 9.83494687423415e-27 | 7                  | ENTPD1     | GC |       |       |
| 5.9300966901272e-31  | 0.340587460363434  |            |    | 0.221 | 0.1   |
| 1.05727693888278e-26 | 7                  | SCIMP      | GC |       |       |
| 7.1524869803925e-31  | -0.420888853759188 |            |    | 0.068 | 0.151 |
| 1.27521690373418e-26 | 7                  | SVIP       | GC |       |       |
| 8.04707182395676e-31 | 0.326357086662391  |            |    | 0.308 | 0.178 |
| 1.43471243549325e-26 | 7                  | MAP2K2     | GC |       |       |
| 9.57802953242513e-31 | 0.329541256330243  |            |    | 0.37  | 0.223 |
| 1.70766688533608e-26 | 7                  | HDDC2      | GC |       |       |
| 1.55286767346552e-30 | 0.366226848025338  |            |    | 0.51  | 0.306 |
| 2.76860777502168e-26 | 7                  | HMG3       | GC |       |       |
| 2.07337178873108e-30 | 0.311933350123505  |            |    | 0.431 | 0.275 |
| 3.69661456212864e-26 | 7                  | BABAM1     | GC |       |       |
| 2.47148441108012e-30 | 0.316040717018042  |            |    | 0.205 | 0.096 |
| 4.40640955651474e-26 | 7                  | PTPN7      | GC |       |       |
| 2.59058224348566e-30 | 0.301102011239319  |            |    | 0.298 | 0.172 |
| 4.61874908191059e-26 | 7                  | LAP3       | GC |       |       |
| 2.72581946803593e-30 | -0.553713921127222 |            |    | 0.252 | 0.34  |
| 4.85986352956126e-26 | 7                  | CD48       | GC |       |       |
| 2.92063499986024e-30 | -0.487556446900825 |            |    | 0.165 | 0.249 |
| 5.20720014125082e-26 | 7                  | CKS1B      | GC |       |       |
| 4.15839966842475e-30 | 0.30844491923084   | 0.464      |    | 0.3   |       |
| 7.41401076883448e-26 | 7                  | OCIAD2     | GC |       |       |
| 5.52484842337807e-30 | 0.319590989033991  |            |    | 0.296 | 0.171 |
| 9.85025225404076e-26 | 7                  | EIF4E2     | GC |       |       |
| 6.9029086992041e-30  | 0.334007015384761  |            |    | 0.16  | 0.059 |
| 1.2307195919811e-25  | 7                  | HOPX       | GC |       |       |
| 9.37945381614425e-30 | 0.305857648369682  |            |    | 0.491 | 0.327 |
| 1.67226282088036e-25 | 7                  | DARS       | GC |       |       |
| 1.43829384156781e-29 | 0.30151663857827   | 0.501      |    | 0.343 |       |
| 2.56433409013125e-25 | 7                  | DDX17      | GC |       |       |
| 2.6532028463981e-29  | 0.307443510816175  |            |    | 0.35  | 0.189 |
| 4.73039535484317e-25 | 7                  | AFF3       | GC |       |       |
| 3.34490702809913e-29 | -0.528382876521587 |            |    | 0.71  | 0.759 |
| 5.96363474039794e-25 | 7                  | MT-ND5     | GC |       |       |
| 4.56673132908189e-29 | 0.308399541172639  |            |    | 0.37  | 0.213 |
| 8.14202528662011e-25 | 7                  | GNAI2      | GC |       |       |
| 4.97835333759094e-29 | 0.322107469640073  |            |    | 0.264 | 0.137 |

|                      |                    |          |    |       |       |
|----------------------|--------------------|----------|----|-------|-------|
| 8.87590616559088e-25 | 7                  | WDR18    | GC |       |       |
| 5.34614009809551e-29 | -0.583643423809776 |          |    | 0.237 | 0.305 |
| 9.53163318089449e-25 | 7                  | ZFP36L2  | GC |       |       |
| 5.54961067947439e-29 | -0.453767843569982 |          |    | 0.165 | 0.255 |
| 9.89440088043489e-25 | 7                  | DNP1     | GC |       |       |
| 9.77984447031008e-29 | -0.603537289033592 |          |    | 0.591 | 0.65  |
| 1.74364847061158e-24 | 7                  | ZFP36L1  | GC |       |       |
| 1.05541143950535e-28 | 0.307016554735075  |          |    | 0.291 | 0.169 |
| 1.88169305549409e-24 | 7                  | AKIRIN2  | GC |       |       |
| 1.20330332911584e-28 | -0.407537018878164 |          |    | 0.967 | 0.965 |
| 2.14536950548063e-24 | 7                  | RPL38    | GC |       |       |
| 1.6969069254006e-28  | -0.667994224011284 |          |    | 0.213 | 0.331 |
| 3.02541535729673e-24 | 7                  | SLC3A2   | GC |       |       |
| 1.74225899359584e-28 | 0.378774009258864  |          |    | 0.33  | 0.169 |
| 3.10627355968202e-24 | 7                  | QRSL1    | GC |       |       |
| 1.75356981619129e-28 | -0.452176019028573 |          |    | 0.106 | 0.205 |
| 3.12643962528745e-24 | 7                  | NPM3     | GC |       |       |
| 3.82965193057562e-28 | 0.304194904599806  |          |    | 0.669 | 0.478 |
| 6.82788642702327e-24 | 7                  | GMFG     | GC |       |       |
| 5.49667164811476e-28 | -0.598427529749435 |          |    | 0.467 | 0.532 |
| 9.80001588142381e-24 | 7                  | PSME2    | GC |       |       |
| 9.47942693591699e-28 | 0.353076898565535  |          |    | 0.375 | 0.234 |
| 1.69008702840464e-23 | 7                  | ZBTB80S  | GC |       |       |
| 1.20803939706854e-27 | -0.386298471804154 |          |    | 0.05  | 0.126 |
| 2.15381344103351e-23 | 7                  | RAB13    | GC |       |       |
| 1.39102490019397e-27 | 0.300004429987485  |          |    | 0.228 | 0.109 |
| 2.48005829455584e-23 | 7                  | PAX5     | GC |       |       |
| 1.70172510196497e-27 | 0.316048878561009  |          |    | 0.314 | 0.171 |
| 3.03400568429334e-23 | 7                  | RGS19    | GC |       |       |
| 2.43589469522669e-27 | -0.468162094871442 |          |    | 0.125 | 0.229 |
| 4.34295665211967e-23 | 7                  | TMEM109  | GC |       |       |
| 3.46763931991439e-27 | 0.304283732712499  |          |    | 0.457 | 0.278 |
| 6.18245414347536e-23 | 7                  | SP110    | GC |       |       |
| 3.62062073570398e-27 | -0.608944110206936 |          |    | 0.208 | 0.299 |
| 6.45520470968662e-23 | 7                  | NFKBIA   | GC |       |       |
| 1.61272985664683e-26 | 0.321270048357149  |          |    | 0.386 | 0.241 |
| 2.87533606141564e-22 | 7                  | TRAPPC2L | GC |       |       |
| 1.75225553225792e-26 | -0.520234618880155 |          |    | 0.354 | 0.441 |
| 3.12409638846265e-22 | 7                  | IL2RG    | GC |       |       |
| 5.61164996378645e-26 | -0.336683042062128 |          |    | 0.98  | 0.981 |
| 1.00050107204349e-21 | 7                  | RPSA     | GC |       |       |
| 6.89668439991152e-26 | -0.46464771134557  |          |    | 0.205 | 0.297 |
| 1.22960986166022e-21 | 7                  | ACADVL   | GC |       |       |
| 7.80546371876464e-26 | -0.361972139231036 |          |    | 0.964 | 0.959 |
| 1.39163612641855e-21 | 7                  | MT-CYB   | GC |       |       |
| 1.10978561642349e-25 | -0.475899063861331 |          |    | 0.231 | 0.3   |
| 1.97863677552144e-21 | 7                  | PDLIM1   | GC |       |       |
| 1.5372164023832e-25  | -0.442798238522128 |          |    | 0.975 | 0.968 |
| 2.740703123809e-21   | 7                  | RPS17    | GC |       |       |
| 1.94715891558687e-25 | -0.413831117079951 |          |    | 0.135 | 0.193 |

|                      |                    |          |    |       |       |
|----------------------|--------------------|----------|----|-------|-------|
| 3.47158963059983e-21 | 7                  | S1PR4    | GC |       |       |
| 5.54562465158695e-25 | -0.421440799936045 |          |    | 0.102 | 0.188 |
| 9.88729419131438e-21 | 7                  | FKBP4    | GC |       |       |
| 5.99700298275063e-25 | -0.498174990114949 |          |    | 0.116 | 0.199 |
| 1.06920566179461e-20 | 7                  | CHPT1    | GC |       |       |
| 7.10474819406874e-25 | -0.30630578822288  |          |    | 0.999 | 0.998 |
| 1.2667055552052e-20  | 7                  | RPL18A   | GC |       |       |
| 9.51374755845087e-25 | -0.554391418861927 |          |    | 0.243 | 0.331 |
| 1.69620605219621e-20 | 7                  | ZFP36    | GC |       |       |
| 4.64586941063413e-24 | -0.357474994896785 |          |    | 0.041 | 0.1   |
| 8.28312057221959e-20 | 7                  | BTLA     | GC |       |       |
| 1.83591257152475e-23 | -0.531865959564548 |          |    | 0.39  | 0.455 |
| 3.27324852377149e-19 | 7                  | ARL6IP1  | GC |       |       |
| 3.10670979712216e-23 | -0.402054466553493 |          |    | 0.119 | 0.197 |
| 5.53895289728909e-19 | 7                  | ADK      | GC |       |       |
| 3.23284701269287e-23 | 0.311609250214681  |          |    | 0.416 | 0.265 |
| 5.76384293893012e-19 | 7                  | TXNL4A   | GC |       |       |
| 4.50265822876363e-23 | 0.303584835209508  |          |    | 0.522 | 0.36  |
| 8.02778935606268e-19 | 7                  | CXXC5    | GC |       |       |
| 6.99649068149796e-23 | 0.311798858035522  |          |    | 0.475 | 0.291 |
| 1.24740432360427e-18 | 7                  | TCF4     | GC |       |       |
| 7.48526091155749e-23 | -0.418302780638662 |          |    | 0.24  | 0.328 |
| 1.33454716792158e-18 | 7                  | P4HB     | GC |       |       |
| 1.63878901034514e-22 | -0.572712289865882 |          |    | 0.276 | 0.34  |
| 2.92179692654435e-18 | 7                  | HVCN1    | GC |       |       |
| 2.11625021143607e-22 | -0.475152654130298 |          |    | 0.112 | 0.2   |
| 3.77306250196936e-18 | 7                  | TYMP     | GC |       |       |
| 4.08600216382606e-22 | -0.406775229190524 |          |    | 0.118 | 0.189 |
| 7.28493325788548e-18 | 7                  | KIF20B   | GC |       |       |
| 4.08666426617132e-22 | -0.463464903075343 |          |    | 0.303 | 0.387 |
| 7.28611372015684e-18 | 7                  | LAPTM4A  | GC |       |       |
| 4.91519040585298e-22 | -0.441032873722778 |          |    | 0.055 | 0.139 |
| 8.76329297459529e-18 | 7                  | PSAT1    | GC |       |       |
| 6.8499763629347e-21  | -0.445392510657586 |          |    | 0.154 | 0.231 |
| 1.22128228574763e-16 | 7                  | NT5C3A   | GC |       |       |
| 1.12251076332481e-20 | -0.422601483247309 |          |    | 0.122 | 0.192 |
| 2.00132443993181e-16 | 7                  | IFNGR1   | GC |       |       |
| 1.32528282803844e-20 | -0.449718811678018 |          |    | 0.14  | 0.235 |
| 2.36284675410973e-16 | 7                  | TARS     | GC |       |       |
| 1.36834269134157e-20 | -0.373193910165664 |          |    | 0.059 | 0.107 |
| 2.43961818439289e-16 | 7                  | C1orf162 | GC |       |       |
| 1.53353658705007e-20 | -0.327437537123696 |          |    | 0.073 | 0.151 |
| 2.73414238105157e-16 | 7                  | TSEN15   | GC |       |       |
| 1.54031476242266e-20 | -0.421452131865882 |          |    | 0.174 | 0.234 |
| 2.74622718992337e-16 | 7                  | HSD17B11 | GC |       |       |
| 1.78744689340755e-20 | -0.413389906969218 |          |    | 0.135 | 0.19  |
| 3.18683906625632e-16 | 7                  | PCNA     | GC |       |       |
| 2.17765295133565e-20 | -0.650371691397793 |          |    | 0.573 | 0.598 |
| 3.88253744693634e-16 | 7                  | LDHA     | GC |       |       |
| 2.58231209634336e-20 | -0.478301605940831 |          |    | 0.196 | 0.285 |



|                      |                    |               |       |       |
|----------------------|--------------------|---------------|-------|-------|
| 4.60400423657058e-16 | 7                  | MT-ND4L GC    |       |       |
| 3.16974902305098e-20 | -0.385318544702153 |               | 0.118 | 0.207 |
| 5.6513455331976e-16  | 7                  | NDFIP1 GC     |       |       |
| 1.09207381068147e-19 | -0.438774888367664 |               | 0.274 | 0.351 |
| 1.947058397064e-15   | 7                  | LITAF GC      |       |       |
| 1.13689909957833e-19 | 0.400372806563834  |               | 0.217 | 0.106 |
| 2.02697740463821e-15 | 7                  | CD9 GC        |       |       |
| 1.92146522482994e-19 | -0.492264260184876 |               | 0.421 | 0.469 |
| 3.42578034934931e-15 | 7                  | ITM2B GC      |       |       |
| 1.97994288428478e-19 | -0.399117830923348 |               | 0.108 | 0.177 |
| 3.53004016839134e-15 | 7                  | ASAH1 GC      |       |       |
| 5.19360170338922e-19 | -0.68438666054584  |               | 0.48  | 0.5   |
| 9.25967247697264e-15 | 7                  | SSR4 GC       |       |       |
| 3.92909524304734e-18 | -0.355364443789783 |               | 0.062 | 0.125 |
| 7.00518390882911e-14 | 7                  | DDAH2 GC      |       |       |
| 5.26167904933858e-18 | -0.416218078712299 |               | 0.225 | 0.309 |
| 9.38104757706576e-14 | 7                  | TMEM147 GC    |       |       |
| 6.35439860774002e-18 | -0.317777090891407 |               | 0.085 | 0.148 |
| 1.13292572777397e-13 | 7                  | PRDX4 GC      |       |       |
| 6.41318667456297e-18 | -0.521400236526457 |               | 0.252 | 0.349 |
| 1.14340705220783e-13 | 7                  | CAST GC       |       |       |
| 8.19462277044776e-18 | -0.511945759222573 |               | 0.181 | 0.283 |
| 1.46101929374313e-13 | 7                  | WARS GC       |       |       |
| 1.75549348262211e-17 | -0.476150243532026 |               | 0.469 | 0.535 |
| 3.12986933016696e-13 | 7                  | IMPDH2 GC     |       |       |
| 2.67955688759317e-17 | -0.626999578023736 |               | 0.076 | 0.133 |
| 4.77738197488986e-13 | 7                  | MYC GC        |       |       |
| 2.94175197387962e-17 | -0.4601823624469   | 0.423         | 0.483 |       |
| 5.24484959422998e-13 | 7                  | ISCU GC       |       |       |
| 3.9642003236823e-17  | -0.453524818483835 |               | 0.174 | 0.213 |
| 7.06777275709317e-13 | 7                  | LBH GC        |       |       |
| 6.11534347672347e-17 | 0.30951903203743   | 0.595         | 0.413 |       |
| 1.09030458846503e-12 | 7                  | AC114760.2 GC |       |       |
| 1.0611896383149e-16  | -0.368298443446549 |               | 0.145 | 0.207 |
| 1.89199500615164e-12 | 7                  | AP1S2 GC      |       |       |
| 1.16825315120419e-16 | -0.431802735832216 |               | 0.849 | 0.855 |
| 2.08287854328195e-12 | 7                  | SH3BGR13 GC   |       |       |
| 1.74781324520143e-16 | -0.319309002411005 |               | 0.073 | 0.119 |
| 3.11617623486962e-12 | 7                  | SAMD9 GC      |       |       |
| 3.68977502454784e-16 | -0.506822187955961 |               | 0.192 | 0.258 |
| 6.57849989126635e-12 | 7                  | SRGN GC       |       |       |
| 3.74857896884413e-16 | -0.443753058423522 |               | 0.967 | 0.978 |
| 6.6833414435522e-12  | 7                  | RPS10 GC      |       |       |
| 4.193188740398e-16   | -0.399920053545072 |               | 0.107 | 0.173 |
| 7.47603620525559e-12 | 7                  | PARP14 GC     |       |       |
| 7.20359805864675e-16 | -0.524598196466286 |               | 0.341 | 0.211 |
| 1.28432949787613e-11 | 7                  | IGHG1 GC      |       |       |
| 8.09662485763711e-16 | -0.404226699025364 |               | 0.237 | 0.281 |
| 1.44354724586812e-11 | 7                  | RNASET2 GC    |       |       |
| 8.37693934890406e-16 | -0.468599250080092 |               | 0.088 | 0.163 |

|                      |                    |          |    |       |       |
|----------------------|--------------------|----------|----|-------|-------|
| 1.49352451651611e-11 | 7                  | DDIT4    | GC |       |       |
| 9.49393092739213e-16 | -0.379776914622971 |          |    | 0.099 | 0.149 |
| 1.69267294504474e-11 | 7                  | ARRDC2   | GC |       |       |
| 1.49799276246791e-15 | -0.677694979886916 |          |    | 0.435 | 0.473 |
| 2.67077129620404e-11 | 7                  | CD83     | GC |       |       |
| 1.56998495392623e-15 | -0.431047820110872 |          |    | 0.068 | 0.128 |
| 2.79912617435508e-11 | 7                  | LGALS3   | GC |       |       |
| 1.7605883886225e-15  | -0.378460663506361 |          |    | 0.184 | 0.254 |
| 3.13895303807505e-11 | 7                  | NFE2L2   | GC |       |       |
| 1.82819921787692e-15 | -0.445186517702014 |          |    | 0.677 | 0.697 |
| 3.25949638555277e-11 | 7                  | HNRNPDL  | GC |       |       |
| 2.63570001430058e-15 | -0.426446804211037 |          |    | 0.29  | 0.338 |
| 4.69918955549651e-11 | 7                  | S100A11  | GC |       |       |
| 8.12568771275857e-15 | -0.34021086930718  |          |    | 0.095 | 0.159 |
| 1.44872886230772e-10 | 7                  | NOLC1    | GC |       |       |
| 8.83171823136217e-15 | -0.328869677712607 |          |    | 0.11  | 0.16  |
| 1.57460704346956e-10 | 7                  | TGIF1    | GC |       |       |
| 1.57730792585078e-14 | -0.36461888633674  |          |    | 0.982 | 0.976 |
| 2.81218230099935e-10 | 7                  | RPL36A   | GC |       |       |
| 7.11696635069817e-14 | -0.389598591992864 |          |    | 0.439 | 0.477 |
| 1.26888393066598e-09 | 7                  | N4BP2L2  | GC |       |       |
| 8.08409003369858e-14 | -0.466211654184337 |          |    | 0.154 | 0.22  |
| 1.44131241210812e-09 | 7                  | EIF4EBP1 | GC |       |       |
| 1.24225752791075e-13 | -0.362794214548509 |          |    | 0.743 | 0.753 |
| 2.21482094651208e-09 | 7                  | TOMM7    | GC |       |       |
| 2.39615334548589e-13 | -0.334650712656381 |          |    | 0.128 | 0.199 |
| 4.27210179966679e-09 | 7                  | AARS     | GC |       |       |
| 3.22441505508942e-13 | -0.425770595033022 |          |    | 0.31  | 0.364 |
| 5.74880960171893e-09 | 7                  | HSPA9    | GC |       |       |
| 3.56378122857147e-13 | -0.445489935609504 |          |    | 0.237 | 0.282 |
| 6.35386555242008e-09 | 7                  | SRM      | GC |       |       |
| 4.09611946696549e-13 | -0.3971530373065   | 0.284    |    | 0.344 |       |
| 7.30297139765278e-09 | 7                  | PKIG     | GC |       |       |
| 5.34209812674848e-13 | -0.303369244137959 |          |    | 0.144 | 0.201 |
| 9.52442675017986e-09 | 7                  | NENF     | GC |       |       |
| 6.55565747586998e-13 | -2.15193420112187  |          |    | 0.63  | 0.443 |
| 1.16880817137286e-08 | 7                  | IGHG3    | GC |       |       |
| 7.96475057827908e-13 | -0.388164845891362 |          |    | 0.303 | 0.339 |
| 1.42003538060138e-08 | 7                  | IER2     | GC |       |       |
| 1.09070963450646e-12 | -0.318820441552175 |          |    | 0.143 | 0.191 |
| 1.94462620736156e-08 | 7                  | CWF19L2  | GC |       |       |
| 1.21852031212327e-12 | -0.403327232740779 |          |    | 0.106 | 0.168 |
| 2.17249986448457e-08 | 7                  | CBX6     | GC |       |       |
| 1.38533497018356e-12 | -0.327343211313887 |          |    | 0.128 | 0.184 |
| 2.46991371834026e-08 | 7                  | CMSS1    | GC |       |       |
| 2.7933802441585e-12  | -0.348411985106111 |          |    | 0.11  | 0.146 |
| 4.98031763731019e-08 | 7                  | SUN2     | GC |       |       |
| 3.76733422313246e-12 | -0.312412775966991 |          |    | 0.261 | 0.299 |
| 6.71678018642287e-08 | 7                  | MPHOSPH8 | GC |       |       |
| 6.38020776117533e-12 | -0.327095685363387 |          |    | 0.167 | 0.219 |

|                      |                    |          |    |       |       |
|----------------------|--------------------|----------|----|-------|-------|
| 1.13752724173995e-07 | 7                  | NFKBIE   | GC |       |       |
| 1.67489503858215e-11 | -0.340353379278459 |          |    | 0.103 | 0.165 |
| 2.98617036428811e-07 | 7                  | CD58     | GC |       |       |
| 1.92712199731549e-11 | -0.330471628272964 |          |    | 0.147 | 0.205 |
| 3.43586580901378e-07 | 7                  | PTPN1    | GC |       |       |
| 3.21893515758512e-11 | -0.49556555722635  |          |    | 0.308 | 0.362 |
| 5.73903949245851e-07 | 7                  | ARID5B   | GC |       |       |
| 6.04124969312851e-11 | -0.347163212535956 |          |    | 0.22  | 0.265 |
| 1.07709440778788e-06 | 7                  | TTC3     | GC |       |       |
| 9.04455704014901e-11 | -0.655925746306461 |          |    | 0.447 | 0.428 |
| 1.61255407468817e-06 | 7                  | IGLC3    | GC |       |       |
| 1.24559707954741e-10 | -0.357656237775172 |          |    | 0.36  | 0.39  |
| 2.22077503312507e-06 | 7                  | ARL6IP5  | GC |       |       |
| 5.58020732796098e-10 | -0.307214339364833 |          |    | 0.267 | 0.299 |
| 9.94895164502162e-06 | 7                  | RNASEH2B | GC |       |       |
| 9.65034135745872e-10 | -0.394002309521911 |          |    | 0.417 | 0.445 |
| 1.72055936062132e-05 | 7                  | ANXA2    | GC |       |       |
| 1.1731505350235e-09  | -0.494981565954984 |          |    | 0.495 | 0.484 |
| 2.09161008889339e-05 | 7                  | RANBP1   | GC |       |       |
| 2.49178615798716e-09 | -0.333910768265198 |          |    | 0.145 | 0.192 |
| 4.44260554107531e-05 | 7                  | RNF145   | GC |       |       |
| 4.63345503888431e-09 | -0.357085713599044 |          |    | 0.169 | 0.21  |
| 8.26098698882684e-05 | 7                  | PIM3     | GC |       |       |
| 6.78409747734027e-09 | -0.344200449389926 |          |    | 0.351 | 0.395 |
| 0.0001209536739235   | 7                  | TMED2    | GC |       |       |
| 8.76708047044595e-09 | -0.319255954956998 |          |    | 0.157 | 0.184 |
| 0.000156308277707581 | 7                  | MBP      | GC |       |       |
| 8.87884463465121e-09 | -0.369041658035198 |          |    | 0.815 | 0.815 |
| 0.000158300920991196 | 7                  | NOP53    | GC |       |       |
| 2.76244385384116e-08 | -0.34814166931123  |          |    | 0.832 | 0.817 |
| 0.000492516114701341 | 7                  | SEPT7    | GC |       |       |
| 3.04744886845864e-08 | -0.348981413947068 |          |    | 0.37  | 0.403 |
| 0.000543329658757492 | 7                  | CMPK1    | GC |       |       |
| 1.05383588299749e-07 | -0.402342429265526 |          |    | 0.42  | 0.446 |
| 0.00187888399579622  | 7                  | KLF6     | GC |       |       |
| 4.4272848373439e-07  | -0.340708452924818 |          |    | 0.297 | 0.323 |
| 0.00789340613650043  | 7                  | NOP56    | GC |       |       |
| 1.40680265629529e-06 | -0.406627380296407 |          |    | 0.524 | 0.512 |
| 0.0250818845590888   | 7                  | PA2G4    | GC |       |       |
| 2.21410810378326e-06 | -0.303899114015397 |          |    | 0.376 | 0.387 |
| 0.0394753333823518   | 7                  | PSAP     | GC |       |       |
| 3.68195806561729e-06 | -0.64458677785558  |          |    | 0.892 | 0.846 |
| 0.0656456303518907   | 7                  | HSP90AB1 | GC |       |       |
| 4.88645783159442e-06 | -0.333822906059229 |          |    | 0.499 | 0.494 |
| 0.087120656679497    | 7                  | SP100    | GC |       |       |
| 6.4454095094098e-06  | -0.607221171768344 |          |    | 0.603 | 0.415 |
| 0.114915206143267    | 7                  | HIST1H4C | GC |       |       |
| 1.57552537702154e-05 | -0.344554850235906 |          |    | 0.761 | 0.769 |
| 0.28090041946917     | 7                  | RPL17    | GC |       |       |
| 3.98704778187867e-05 | -0.330269166408148 |          |    | 0.476 | 0.468 |

|                       |                   |                    |          |       |       |   |  |
|-----------------------|-------------------|--------------------|----------|-------|-------|---|--|
| 0.710850749031148     | 7                 | CYCS               | GC       |       |       |   |  |
| 8.44338381238344e-05  |                   | -0.40395573941876  |          | 0.304 | 0.318 | 1 |  |
|                       | 7                 | DDX21              | GC       |       |       |   |  |
| 0.00017014318241972   |                   | -0.30659497799711  |          | 0.315 | 0.337 | 1 |  |
|                       | 7                 | APOBEC3C           | GC       |       |       |   |  |
| 0.00017398684579542   |                   | -0.304764775606539 |          | 0.666 | 0.652 | 1 |  |
|                       | 7                 | TMBIM6             | GC       |       |       |   |  |
| 0.000824343145575944  |                   | -1.54060985281035  |          | 0.196 | 0.123 | 1 |  |
|                       | 7                 | IGHG2              | GC       |       |       |   |  |
| 0.00127285704132409   |                   | -0.610165922056035 |          | 0.475 | 0.401 | 1 |  |
|                       | 7                 | FABP5              | GC       |       |       |   |  |
| 0.00480681446902977   |                   | 0.337439698789602  |          | 0.857 | 0.749 | 1 |  |
|                       | 7                 | HLA-DRB1           | GC       |       |       |   |  |
| 0.00719744888396772   |                   | -0.862178098002958 |          | 0.133 | 0.148 | 1 |  |
|                       | 7                 | IGHA1              | GC       |       |       |   |  |
| 0                     | 0.476358932388696 | 1                  | 0.999    | 0     | 8     |   |  |
| RPS29                 | Memory 1          |                    |          |       |       |   |  |
| 0                     | -2.38558010299426 | 0.147              | 0.675    | 0     | 8     |   |  |
| TCL1A                 | Memory 1          |                    |          |       |       |   |  |
| 1.5607533752125e-320  |                   | 0.487241293980978  |          | 1     | 0.998 |   |  |
| 2.78266719266636e-316 | 8                 | B2M                | Memory 1 |       |       |   |  |
| 2.17969024214942e-312 |                   | 0.406263418039281  |          | 1     | 1     |   |  |
| 3.8861697327282e-308  | 8                 | RPS27              | Memory 1 |       |       |   |  |
| 1.09767364658713e-306 |                   | -1.70528316846002  |          | 0.668 | 0.916 |   |  |
| 1.95704234450019e-302 | 8                 | IGHM               | Memory 1 |       |       |   |  |
| 1.03960700984482e-294 |                   | 0.431109948314588  |          | 1     | 0.999 |   |  |
| 1.85351533785233e-290 | 8                 | RPL34              | Memory 1 |       |       |   |  |
| 3.31570587071306e-293 |                   | 0.44852744185538   | 1        | 0.998 |       |   |  |
| 5.91157199689431e-289 | 8                 | RPS14              | Memory 1 |       |       |   |  |
| 5.58704912415278e-282 |                   | 0.892421550906211  |          | 0.952 | 0.768 |   |  |
| 9.961149883452e-278   | 8                 | HLA-DPB1           | Memory 1 |       |       |   |  |
| 5.08145844283475e-279 |                   | 0.37838122158222   | 1        | 1     |       |   |  |
| 9.05973225773008e-275 | 8                 | RPL41              | Memory 1 |       |       |   |  |
| 1.67111818299745e-253 |                   | 0.367101745532138  |          | 1     | 1     |   |  |
| 2.97943660846616e-249 | 8                 | RPL21              | Memory 1 |       |       |   |  |
| 4.77711520842862e-252 |                   | 0.66620095633633   | 0.997    | 0.944 |       |   |  |
| 8.51711870510738e-248 | 8                 | HLA-DRA            | Memory 1 |       |       |   |  |
| 1.48039685974775e-239 |                   | 0.43879876851449   | 1        | 0.996 |       |   |  |
| 2.63939956124426e-235 | 8                 | RPS15A             | Memory 1 |       |       |   |  |
| 8.80317633276127e-238 |                   | -1.4553073414292   | 0.23     | 0.621 |       |   |  |
| 1.56951830836801e-233 | 8                 | IGHD               | Memory 1 |       |       |   |  |
| 1.73429070786402e-210 |                   | 0.377102992393938  |          | 1     | 0.998 |   |  |
| 3.09206690305077e-206 | 8                 | RPS28              | Memory 1 |       |       |   |  |
| 4.6569327828468e-198  |                   | 0.353555658666749  |          | 1     | 0.998 |   |  |
| 8.30284545853756e-194 | 8                 | RPL39              | Memory 1 |       |       |   |  |
| 3.46359828884082e-195 |                   | 0.334633954779413  |          | 1     | 0.999 |   |  |
| 6.17524938917429e-191 | 8                 | RPL13              | Memory 1 |       |       |   |  |
| 1.00400120120273e-182 |                   | 0.359758924035121  |          | 1     | 0.998 |   |  |
| 1.79003374162435e-178 | 8                 | RPL11              | Memory 1 |       |       |   |  |
| 9.9497038502606e-174  |                   | 0.924182040863996  |          | 0.597 | 0.292 |   |  |

|                       |                    |           |        |   |       |       |
|-----------------------|--------------------|-----------|--------|---|-------|-------|
| 1.77393269946296e-169 | 8                  | CD27      | Memory | 1 |       |       |
| 3.14629144664208e-173 | 0.531584532565359  |           |        |   | 0.979 | 0.902 |
| 5.60952302021817e-169 | 8                  | HLA-A     | Memory | 1 |       |       |
| 7.01848866056638e-170 | 0.692070732463304  |           |        |   | 0.946 | 0.809 |
| 1.25132634329238e-165 | 8                  | HLA-DPA1  | Memory | 1 |       |       |
| 5.13947521368742e-165 | 0.866775090493976  |           |        |   | 0.155 | 0.014 |
| 9.1631703584833e-161  | 8                  | LINC01781 | Memory | 1 |       |       |
| 2.1188458947982e-161  | 0.31655699520884   | 1         |        |   | 0.999 |       |
| 3.77769034583571e-157 | 8                  | RPS18     | Memory | 1 |       |       |
| 1.93457623072831e-160 | 0.398582010794327  |           |        |   | 0.998 | 0.991 |
| 3.4491559617655e-156  | 8                  | RPL30     | Memory | 1 |       |       |
| 5.23530979964956e-146 | 0.311798070289128  |           |        | 1 |       | 0.998 |
| 9.3340338417952e-142  | 8                  | RPL23A    | Memory | 1 |       |       |
| 7.23055168658697e-145 | 0.305873776010345  |           |        | 1 |       | 0.998 |
| 1.28913506020159e-140 | 8                  | RPLP2     | Memory | 1 |       |       |
| 3.62966212457959e-143 | 0.365072583628983  |           |        |   | 0.998 | 0.986 |
| 6.47132460191296e-139 | 8                  | HLA-B     | Memory | 1 |       |       |
| 1.43998273397279e-141 | 0.864489326148504  |           |        |   | 0.516 | 0.238 |
| 2.56734521640009e-137 | 8                  | TNFRSF13B | Memory | 1 |       |       |
| 7.16026785007357e-131 | 0.710324680855484  |           |        |   | 0.749 | 0.479 |
| 1.27660415498962e-126 | 8                  | LTB       | Memory | 1 |       |       |
| 2.29236865612704e-121 | 0.324531145926917  |           |        |   | 0.999 | 0.995 |
| 4.0870640770089e-117  | 8                  | RPS25     | Memory | 1 |       |       |
| 3.62127734540287e-117 | 0.85182049578299   | 0.504     |        |   | 0.259 |       |
| 6.45637537911877e-113 | 8                  | GPR183    | Memory | 1 |       |       |
| 1.20608708047575e-112 | 0.767523060532184  |           |        |   | 0.315 | 0.133 |
| 2.15033265578022e-108 | 8                  | AIM2      | Memory | 1 |       |       |
| 2.84048530090503e-108 | 0.32499538053701   | 0.999     |        |   | 0.992 |       |
| 5.06430124298358e-104 | 8                  | RPL36     | Memory | 1 |       |       |
| 1.68224629505685e-105 | 0.642085280421069  |           |        |   | 0.665 | 0.429 |
| 2.99927691945686e-101 | 8                  | COTL1     | Memory | 1 |       |       |
| 1.72419686399794e-105 | -0.928920317872067 |           |        |   | 0.086 | 0.307 |
| 3.07407058882192e-101 | 8                  | NME1      | Memory | 1 |       |       |
| 1.09687130329605e-101 | 0.699636954959236  |           |        |   | 0.59  | 0.343 |
| 1.95561184664653e-97  | 8                  | TXNIP     | Memory | 1 |       |       |
| 5.55476041508549e-96  | 0.783511058862296  |           |        |   | 0.281 | 0.134 |
| 9.90358234405592e-92  | 8                  | ITGB1     | Memory | 1 |       |       |
| 5.27093336476026e-94  | 0.3845062495616    | 0.963     |        |   | 0.865 |       |
| 9.39754709603107e-90  | 8                  | CD52      | Memory | 1 |       |       |
| 1.44715356491144e-93  | -1.28644684611088  |           |        |   | 0.04  | 0.213 |
| 2.5801300908806e-89   | 8                  | RGS13     | Memory | 1 |       |       |
| 2.0855859821487e-91   | -0.765450304211893 |           |        |   | 0.039 | 0.204 |
| 3.71839124757292e-87  | 8                  | YBX3      | Memory | 1 |       |       |
| 2.48831813867077e-90  | -0.753349848410696 |           |        |   | 0.403 | 0.616 |
| 4.43642240943612e-86  | 8                  | POMP      | Memory | 1 |       |       |
| 2.49085225720875e-90  | 0.499066896583314  |           |        |   | 0.885 | 0.691 |
| 4.44094048937749e-86  | 8                  | EMP3      | Memory | 1 |       |       |
| 9.13574073458124e-88  | 0.566663952865195  |           |        |   | 0.497 | 0.265 |
| 1.62881121556849e-83  | 8                  | KLF2      | Memory | 1 |       |       |
| 2.09876951544624e-85  | -1.07586251465615  |           |        |   | 0.203 | 0.412 |

|                      |                    |          |        |   |       |       |
|----------------------|--------------------|----------|--------|---|-------|-------|
| 3.7418961690891e-81  | 8                  | FABP5    | Memory | 1 |       |       |
| 9.2310196498163e-85  | 0.483889513587032  |          |        |   | 0.898 | 0.789 |
| 1.64579849336575e-80 | 8                  | HLA-E    | Memory | 1 |       |       |
| 1.83931952633716e-83 | -0.936026833001236 |          |        |   | 0.427 | 0.606 |
| 3.27932278350652e-79 | 8                  | PRDX1    | Memory | 1 |       |       |
| 8.35177162351197e-81 | 0.530929397144078  |          |        |   | 0.867 | 0.747 |
| 1.48903736275595e-76 | 8                  | HLA-C    | Memory | 1 |       |       |
| 1.48154803159962e-80 | -0.728413081663965 |          |        |   | 0.137 | 0.355 |
| 2.64145198553896e-76 | 8                  | ABRACL   | Memory | 1 |       |       |
| 2.85111768567721e-79 | 0.532828699973475  |          |        |   | 0.698 | 0.505 |
| 5.08325772179389e-75 | 8                  | BANK1    | Memory | 1 |       |       |
| 3.58824036257116e-78 | 0.34963325996132   | 0.986    |        |   | 0.964 |       |
| 6.39747374242812e-74 | 8                  | RPL38    | Memory | 1 |       |       |
| 1.64062571629282e-77 | -1.33096987306361  |          |        |   | 0.132 | 0.293 |
| 2.92507158957847e-73 | 8                  | MIR155HG | Memory | 1 |       |       |
| 4.30393447335897e-76 | -0.526392341963462 |          |        |   | 0.005 | 0.123 |
| 7.67348477255171e-72 | 8                  | CD38     | Memory | 1 |       |       |
| 7.06103937897807e-73 | 0.539694404179118  |          |        |   | 0.157 | 0.064 |
| 1.258912710878e-68   | 8                  | TEX9     | Memory | 1 |       |       |
| 8.2634862624819e-71  | 0.585387177606831  |          |        |   | 0.283 | 0.146 |
| 1.4732969657379e-66  | 8                  | CLECL1   | Memory | 1 |       |       |
| 2.6738594668211e-70  | 0.480679725387467  |          |        |   | 0.847 | 0.749 |
| 4.76722404339533e-66 | 8                  | TOMM7    | Memory | 1 |       |       |
| 7.70739229736894e-69 | 0.377700309664275  |          |        |   | 0.959 | 0.916 |
| 1.37415097269791e-64 | 8                  | PFDN5    | Memory | 1 |       |       |
| 1.39951148409097e-68 | 0.452098244182089  |          |        |   | 0.831 | 0.692 |
| 2.49518902498579e-64 | 8                  | HLA-DQB1 | Memory | 1 |       |       |
| 1.09746288839504e-67 | -0.618892149414825 |          |        |   | 0.192 | 0.401 |
| 1.95666658371951e-63 | 8                  | YWHAE    | Memory | 1 |       |       |
| 2.77664419023532e-67 | 0.470244301875363  |          |        |   | 0.558 | 0.364 |
| 4.95047892677056e-63 | 8                  | SELL     | Memory | 1 |       |       |
| 1.20237105134142e-66 | 0.519004547053941  |          |        |   | 0.663 | 0.497 |
| 2.14370734743661e-62 | 8                  | TSC22D3  | Memory | 1 |       |       |
| 2.33954147647078e-65 | -0.717367682575268 |          |        |   | 0.304 | 0.492 |
| 4.17116849839975e-61 | 8                  | RANBP1   | Memory | 1 |       |       |
| 4.73919776241571e-65 | -0.674016712793707 |          |        |   | 0.052 | 0.208 |
| 8.44951569061098e-61 | 8                  | HMCS     | Memory | 1 |       |       |
| 7.30147348530923e-65 | -0.364433839674759 |          |        |   | 0.004 | 0.107 |
| 1.30177970769578e-60 | 8                  | SEMA4A   | Memory | 1 |       |       |
| 3.72888859049428e-64 | -0.872832375807065 |          |        |   | 0.609 | 0.719 |
| 6.64823546799225e-60 | 8                  | ENO1     | Memory | 1 |       |       |
| 8.74768995437129e-64 | -1.04525810070724  |          |        |   | 0.541 | 0.671 |
| 1.55962564196486e-59 | 8                  | TUBA1B   | Memory | 1 |       |       |
| 1.01715476575851e-63 | -0.629185173218136 |          |        |   | 0.468 | 0.64  |
| 1.81348523187085e-59 | 8                  | PSMA4    | Memory | 1 |       |       |
| 1.29881279014052e-63 | -0.867244250542623 |          |        |   | 0.429 | 0.594 |
| 2.31565332354154e-59 | 8                  | MARCKSL1 | Memory | 1 |       |       |
| 1.68638208999451e-63 | -0.576027401642503 |          |        |   | 0.452 | 0.639 |
| 3.00665062825122e-59 | 8                  | GSTP1    | Memory | 1 |       |       |
| 3.17367636355531e-63 | -0.650272671933088 |          |        |   | 0.289 | 0.481 |

|                      |                    |            |        |   |       |       |
|----------------------|--------------------|------------|--------|---|-------|-------|
| 5.65834758858275e-59 | 8                  | SNRPD1     | Memory | 1 |       |       |
| 7.40092901316716e-63 | -0.658853590887202 |            |        |   | 0.074 | 0.239 |
| 1.31951163375757e-58 | 8                  | IL4R       | Memory | 1 |       |       |
| 2.37392299542443e-61 | -0.746613533571824 |            |        |   | 0.649 | 0.752 |
| 4.23246730854222e-57 | 8                  | RAN        | Memory | 1 |       |       |
| 4.56289339827844e-61 | 0.352036325170562  |            |        |   | 0.94  | 0.879 |
| 8.13518263979063e-57 | 8                  | MS4A1      | Memory | 1 |       |       |
| 5.19731261370408e-60 | 0.563330397521543  |            |        |   | 0.297 | 0.163 |
| 9.266288658973e-56   | 8                  | SAMSN1     | Memory | 1 |       |       |
| 3.01762019092977e-59 | 0.324364785526928  |            |        |   | 0.982 | 0.968 |
| 5.38011503840868e-55 | 8                  | MT-ND3     | Memory | 1 |       |       |
| 8.87442201693761e-59 | -0.705010196430665 |            |        |   | 0.451 | 0.602 |
| 1.58222070139981e-54 | 8                  | LDHA       | Memory | 1 |       |       |
| 1.01628066691884e-58 | -0.390570742917546 |            |        |   | 0.005 | 0.105 |
| 1.8119268010496e-54  | 8                  | MYBL2      | Memory | 1 |       |       |
| 1.19433536974158e-58 | -0.98407854494989  |            |        |   | 0.051 | 0.187 |
| 2.12938053071227e-54 | 8                  | XBP1       | Memory | 1 |       |       |
| 3.06370673170752e-57 | -0.796232213600496 |            |        |   | 0.785 | 0.85  |
| 5.46228273196134e-53 | 8                  | HSP90AB1   | Memory | 1 |       |       |
| 8.94607617590186e-57 | 0.39831223160314   |            |        |   | 0.782 | 0.648 |
| 1.59499592140154e-52 | 8                  | HLA-DQA1   | Memory | 1 |       |       |
| 9.03982469542951e-57 | -0.57794590722011  |            |        |   | 0.214 | 0.396 |
| 1.61171034494813e-52 | 8                  | CCT5       | Memory | 1 |       |       |
| 9.91920003582827e-57 | -0.608709569196405 |            |        |   | 0.497 | 0.651 |
| 1.76849417438782e-52 | 8                  | SNRPG      | Memory | 1 |       |       |
| 4.37434212642011e-56 | -0.597933945591883 |            |        |   | 0.407 | 0.578 |
| 7.79901457719441e-52 | 8                  | SNRPE      | Memory | 1 |       |       |
| 1.199421972507e-55   | -0.569737925048252 |            |        |   | 0.019 | 0.127 |
| 2.13844943478273e-51 | 8                  | AL139020.1 | Memory | 1 |       |       |
| 1.40424029395091e-55 | -0.674772222168536 |            |        |   | 0.643 | 0.752 |
| 2.50362002008508e-51 | 8                  | HSP90AA1   | Memory | 1 |       |       |
| 1.32240574288326e-54 | -1.00643242652992  |            |        |   | 0.605 | 0.72  |
| 2.35771719898656e-50 | 8                  | HMG2       | Memory | 1 |       |       |
| 2.81555308563522e-54 | -0.586364685146066 |            |        |   | 0.509 | 0.669 |
| 5.01984959637903e-50 | 8                  | DBI        | Memory | 1 |       |       |
| 6.70879566776146e-54 | -0.755144065052873 |            |        |   | 0.179 | 0.346 |
| 1.19611117960519e-49 | 8                  | LRMP       | Memory | 1 |       |       |
| 1.82967639647672e-53 | -0.540438194434288 |            |        |   | 0.272 | 0.456 |
| 3.26213004727834e-49 | 8                  | ILF2       | Memory | 1 |       |       |
| 6.31655172466307e-53 | 0.445342059723423  |            |        |   | 0.154 | 0.065 |
| 1.12617800699018e-48 | 8                  | THEMIS2    | Memory | 1 |       |       |
| 6.91563459902694e-53 | -0.649963425422306 |            |        |   | 0.166 | 0.338 |
| 1.23298849266051e-48 | 8                  | GRHPR      | Memory | 1 |       |       |
| 2.05655508117831e-52 | -0.505923194435    |            |        |   | 0.076 | 0.23  |
| 3.66663205423281e-48 | 8                  | SIAH2      | Memory | 1 |       |       |
| 2.89178047363702e-52 | -0.597086530145546 |            |        |   | 0.364 | 0.536 |
| 5.15575540644744e-48 | 8                  | PSME2      | Memory | 1 |       |       |
| 3.43397848061646e-52 | -0.550922035069317 |            |        |   | 0.255 | 0.435 |
| 6.12244023309109e-48 | 8                  | CCT2       | Memory | 1 |       |       |
| 1.21319005385119e-51 | -0.499832083406861 |            |        |   | 0.031 | 0.14  |

|                      |                    |         |        |   |       |       |
|----------------------|--------------------|---------|--------|---|-------|-------|
| 2.16299654701129e-47 | 8                  | PSAT1   | Memory | 1 |       |       |
| 1.62542453829933e-51 | -0.629119674892763 |         |        |   | 0.033 | 0.153 |
| 2.89796940933387e-47 | 8                  | BIK     | Memory | 1 |       |       |
| 2.38271251517497e-51 | -0.828404916130254 |         |        |   | 0.586 | 0.7   |
| 4.24813814330545e-47 | 8                  | H2AFZ   | Memory | 1 |       |       |
| 3.0916996649337e-51  | -0.563225519001366 |         |        |   | 0.371 | 0.541 |
| 5.51219133261029e-47 | 8                  | SRSF9   | Memory | 1 |       |       |
| 4.15006957221302e-51 | 0.416613238556874  |         |        |   | 0.659 | 0.51  |
| 7.39915904029859e-47 | 8                  | LSP1    | Memory | 1 |       |       |
| 3.4078012039015e-50  | -0.538562461411948 |         |        |   | 0.389 | 0.561 |
| 6.07576876643598e-46 | 8                  | SEC61G  | Memory | 1 |       |       |
| 7.18980025906489e-50 | -0.514212822779576 |         |        |   | 0.092 | 0.239 |
| 1.28186948818868e-45 | 8                  | MTHFD2  | Memory | 1 |       |       |
| 9.30030727321719e-50 | -0.531286721333044 |         |        |   | 0.027 | 0.139 |
| 1.65815178374189e-45 | 8                  | NEIL1   | Memory | 1 |       |       |
| 1.76449651953312e-49 | 0.445927373831597  |         |        |   | 0.182 | 0.068 |
| 3.1459208446756e-45  | 8                  | MYO1F   | Memory | 1 |       |       |
| 1.96861531990766e-49 | -0.505233155277629 |         |        |   | 0.344 | 0.521 |
| 3.50984425386338e-45 | 8                  | SSBP1   | Memory | 1 |       |       |
| 2.44455690467195e-49 | 0.50716507404458   | 0.507   |        |   | 0.354 |       |
| 4.35840050533962e-45 | 8                  | ARID5B  | Memory | 1 |       |       |
| 4.96471911014549e-49 | -0.497731683402619 |         |        |   | 0.325 | 0.504 |
| 8.85159770147839e-45 | 8                  | COX5A   | Memory | 1 |       |       |
| 8.81497689725946e-49 | -0.530308588262906 |         |        |   | 0.4   | 0.565 |
| 1.57162223101239e-44 | 8                  | ATP5PF  | Memory | 1 |       |       |
| 1.05236396218851e-48 | -0.384452355382327 |         |        |   | 0.021 | 0.118 |
| 1.87625970818589e-44 | 8                  | PYCR1   | Memory | 1 |       |       |
| 1.5561808632617e-48  | -0.503105973233016 |         |        |   | 0.256 | 0.442 |
| 2.77451486110928e-44 | 8                  | ROMO1   | Memory | 1 |       |       |
| 2.27077601886363e-48 | -0.614708567687478 |         |        |   | 0.909 | 0.934 |
| 4.04856656403197e-44 | 8                  | SERF2   | Memory | 1 |       |       |
| 8.805802131966e-48   | 0.458816950222597  |         |        |   | 0.219 | 0.115 |
| 1.56998646210822e-43 | 8                  | PYCARD  | Memory | 1 |       |       |
| 1.73003321964152e-47 | 0.438753255245464  |         |        |   | 0.19  | 0.087 |
| 3.08447622729887e-43 | 8                  | ITGB7   | Memory | 1 |       |       |
| 2.72651338402983e-47 | -0.436244675461956 |         |        |   | 0.027 | 0.135 |
| 4.86110071238679e-43 | 8                  | PHGDH   | Memory | 1 |       |       |
| 7.06000788156007e-47 | -0.554366893717111 |         |        |   | 0.232 | 0.391 |
| 1.25872880520334e-42 | 8                  | NHP2    | Memory | 1 |       |       |
| 3.12386493412009e-46 | 0.455764337062591  |         |        |   | 0.242 | 0.124 |
| 5.56953879104271e-42 | 8                  | CD24    | Memory | 1 |       |       |
| 7.48320996629048e-46 | -0.515880980517738 |         |        |   | 0.187 | 0.355 |
| 1.33418150488993e-41 | 8                  | TIMM13  | Memory | 1 |       |       |
| 1.19502108206684e-45 | -0.48094065528338  |         |        |   | 0.451 | 0.611 |
| 2.13060308721697e-41 | 8                  | PSMB3   | Memory | 1 |       |       |
| 1.24124401776266e-45 | -0.554305705814373 |         |        |   | 0.526 | 0.662 |
| 2.21301395926905e-41 | 8                  | SLC25A5 | Memory | 1 |       |       |
| 1.50329032853239e-45 | 0.463647354916073  |         |        |   | 0.409 | 0.274 |
| 2.6802163267404e-41  | 8                  | RNASET2 | Memory | 1 |       |       |
| 2.95524599272876e-45 | -0.492493065170676 |         |        |   | 0.361 | 0.53  |



|                      |                    |          |        |   |       |       |
|----------------------|--------------------|----------|--------|---|-------|-------|
| 5.26890808043611e-41 | 8                  | FKBP1A   | Memory | 1 |       |       |
| 3.69797048794782e-45 | 0.467902264459173  |          |        |   | 0.572 | 0.421 |
| 6.59311158296216e-41 | 8                  | PLP2     | Memory | 1 |       |       |
| 6.716546831192e-45   | -0.711825635747179 |          |        |   | 0.327 | 0.477 |
| 1.19749313453322e-40 | 8                  | CD83     | Memory | 1 |       |       |
| 8.47277082998748e-45 | -0.529112547755373 |          |        |   | 0.173 | 0.335 |
| 1.51061031127847e-40 | 8                  | RFTN1    | Memory | 1 |       |       |
| 9.88398225851777e-45 | -0.501278820052391 |          |        |   | 0.152 | 0.309 |
| 1.76221519687113e-40 | 8                  | ODC1     | Memory | 1 |       |       |
| 1.08512549093259e-44 | -0.517187048405589 |          |        |   | 0.452 | 0.603 |
| 1.93467023778372e-40 | 8                  | SEC61B   | Memory | 1 |       |       |
| 1.17554462655339e-44 | -0.479479002646262 |          |        |   | 0.429 | 0.592 |
| 2.09587851468203e-40 | 8                  | EIF2S2   | Memory | 1 |       |       |
| 1.75496365387928e-44 | -0.537537210898121 |          |        |   | 0.562 | 0.684 |
| 3.12892469850136e-40 | 8                  | SRSF3    | Memory | 1 |       |       |
| 1.88555791576673e-44 | -0.605056061071773 |          |        |   | 0.312 | 0.467 |
| 3.36176120802051e-40 | 8                  | HSPD1    | Memory | 1 |       |       |
| 1.98576434041646e-44 | -0.609945631145948 |          |        |   | 0.419 | 0.564 |
| 3.54041924252851e-40 | 8                  | NCL      | Memory | 1 |       |       |
| 2.93550355900318e-44 | 0.576388062987039  |          |        |   | 0.199 | 0.091 |
| 5.23370929534677e-40 | 8                  | KLK1     | Memory | 1 |       |       |
| 3.44244715953102e-44 | 0.403177867655314  |          |        |   | 0.147 | 0.059 |
| 6.13753904072785e-40 | 8                  | KYNU     | Memory | 1 |       |       |
| 3.66547925009275e-44 | -0.498506978571522 |          |        |   | 0.287 | 0.458 |
| 6.53518295499036e-40 | 8                  | MRPL51   | Memory | 1 |       |       |
| 4.54804814040525e-44 | -0.465114271273466 |          |        |   | 0.496 | 0.646 |
| 8.10871502952852e-40 | 8                  | ATP5MF   | Memory | 1 |       |       |
| 5.65463327830041e-44 | -0.488149627308639 |          |        |   | 0.292 | 0.463 |
| 1.00816456718818e-39 | 8                  | SFPQ     | Memory | 1 |       |       |
| 9.87478598006495e-44 | -0.452999262549312 |          |        |   | 0.493 | 0.647 |
| 1.76057559238578e-39 | 8                  | HNRNPM   | Memory | 1 |       |       |
| 1.78616137684676e-43 | -0.45798336638161  |          |        |   | 0.238 | 0.411 |
| 3.1845471187801e-39  | 8                  | PSMB2    | Memory | 1 |       |       |
| 2.41857356017167e-43 | -0.770515205857839 |          |        |   | 0.224 | 0.398 |
| 4.31207480043007e-39 | 8                  | EIF5A    | Memory | 1 |       |       |
| 2.91251671723826e-43 | -0.493999809377469 |          |        |   | 0.271 | 0.437 |
| 5.19272605516409e-39 | 8                  | SLIRP    | Memory | 1 |       |       |
| 9.97200858164354e-43 | 0.445670455119896  |          |        |   | 0.387 | 0.232 |
| 1.77790941002123e-38 | 8                  | CAPG     | Memory | 1 |       |       |
| 6.94283856992253e-42 | -0.504197381162734 |          |        |   | 0.514 | 0.645 |
| 1.23783868863149e-37 | 8                  | ERH      | Memory | 1 |       |       |
| 9.37632775112456e-42 | -0.429703855463891 |          |        |   | 0.146 | 0.312 |
| 1.671705474748e-37   | 8                  | TIMM8B   | Memory | 1 |       |       |
| 1.23523233339537e-41 | 0.445811037585661  |          |        |   | 0.657 | 0.498 |
| 2.2022957272106e-37  | 8                  | HLA-DRB5 | Memory | 1 |       |       |
| 1.41968788375786e-41 | -0.502879189960928 |          |        |   | 0.675 | 0.763 |
| 2.53116152795189e-37 | 8                  | PSMA7    | Memory | 1 |       |       |
| 1.45238388003778e-41 | -0.486026476014739 |          |        |   | 0.263 | 0.423 |
| 2.58945521971936e-37 | 8                  | DDX39A   | Memory | 1 |       |       |
| 6.88218696659595e-41 | -0.596193976278424 |          |        |   | 0.694 | 0.764 |

|                      |                    |         |        |   |       |       |
|----------------------|--------------------|---------|--------|---|-------|-------|
| 1.22702511427439e-36 | 8                  | PKM     | Memory | 1 |       |       |
| 9.56968172722962e-41 | -0.442556224870283 |         |        |   | 0.559 | 0.69  |
| 1.70617855514777e-36 | 8                  | COX6A1  | Memory | 1 |       |       |
| 2.24101231821887e-40 | -0.570626706441605 |         |        |   | 0.18  | 0.323 |
| 3.99550086215242e-36 | 8                  | DDX21   | Memory | 1 |       |       |
| 3.55587362035889e-40 | -0.493218790527977 |         |        |   | 0.081 | 0.212 |
| 6.33976707773787e-36 | 8                  | EAF2    | Memory | 1 |       |       |
| 3.65766328280098e-40 | -0.515918008956022 |         |        |   | 0.072 | 0.188 |
| 6.52124786690586e-36 | 8                  | PLPP5   | Memory | 1 |       |       |
| 6.6029279958911e-40  | -0.475120369110695 |         |        |   | 0.088 | 0.223 |
| 1.17723603238742e-35 | 8                  | NANS    | Memory | 1 |       |       |
| 6.83645516544907e-40 | -0.499947111975908 |         |        |   | 0.448 | 0.59  |
| 1.21887159144791e-35 | 8                  | ATP5MC3 | Memory | 1 |       |       |
| 9.82599251138513e-40 | -0.556919237194785 |         |        |   | 0.193 | 0.332 |
| 1.75187620485486e-35 | 8                  | SLC3A2  | Memory | 1 |       |       |
| 1.26181104373976e-39 | -0.456808806047118 |         |        |   | 0.288 | 0.455 |
| 2.24968290988362e-35 | 8                  | SEM1    | Memory | 1 |       |       |
| 1.38110175629859e-39 | 0.428683935557984  |         |        |   | 0.504 | 0.385 |
| 2.46236632130476e-35 | 8                  | ARL6IP5 | Memory | 1 |       |       |
| 4.42022881240301e-39 | -0.981008821548529 |         |        |   | 0.308 | 0.433 |
| 7.88082594963333e-35 | 8                  | STMN1   | Memory | 1 |       |       |
| 4.57986951022397e-39 | -0.725497440421681 |         |        |   | 0.078 | 0.194 |
| 8.16544934977832e-35 | 8                  | PTTG1   | Memory | 1 |       |       |
| 5.34901459184245e-39 | -0.395771262833415 |         |        |   | 0.096 | 0.23  |
| 9.53675811579591e-35 | 8                  | DCAF13  | Memory | 1 |       |       |
| 6.75382526693508e-39 | -0.405170087995907 |         |        |   | 0.235 | 0.401 |
| 1.20413950684186e-34 | 8                  | NDUFAB1 | Memory | 1 |       |       |
| 7.18469054745107e-39 | -0.524397910557841 |         |        |   | 0.103 | 0.235 |
| 1.28095847770505e-34 | 8                  | CKS2    | Memory | 1 |       |       |
| 2.09342986072763e-38 | -0.468999040058843 |         |        |   | 0.2   | 0.352 |
| 3.7323760986913e-34  | 8                  | H2AFY   | Memory | 1 |       |       |
| 2.10074908383393e-38 | -0.425615779059548 |         |        |   | 0.368 | 0.529 |
| 3.74542554156752e-34 | 8                  | NDUFB8  | Memory | 1 |       |       |
| 2.92729593290721e-38 | -0.529065890225473 |         |        |   | 0.153 | 0.285 |
| 5.21907591878026e-34 | 8                  | SRM     | Memory | 1 |       |       |
| 6.95458616765165e-38 | -0.424596308740748 |         |        |   | 0.529 | 0.661 |
| 1.23993316783061e-33 | 8                  | PSMB1   | Memory | 1 |       |       |
| 6.98301138817246e-38 | -0.730107508596902 |         |        |   | 0.474 | 0.581 |
| 1.24500110039727e-33 | 8                  | TUBB    | Memory | 1 |       |       |
| 1.02112545240205e-37 | -0.506544335218663 |         |        |   | 0.934 | 0.942 |
| 1.82056456908761e-33 | 8                  | YBX1    | Memory | 1 |       |       |
| 1.42673773558929e-37 | -0.413169067906638 |         |        |   | 0.585 | 0.705 |
| 2.54373070878214e-33 | 8                  | ELOB    | Memory | 1 |       |       |
| 1.54863058268437e-37 | -0.415381101898352 |         |        |   | 0.1   | 0.232 |
| 2.76105346586797e-33 | 8                  | NSMCE1  | Memory | 1 |       |       |
| 1.69795442540506e-37 | 0.425063683200183  |         |        |   | 0.195 | 0.108 |
| 3.02728294505467e-33 | 8                  | CRIP1   | Memory | 1 |       |       |
| 1.71908482512395e-37 | -0.409029453651224 |         |        |   | 0.497 | 0.637 |
| 3.06495633471349e-33 | 8                  | COX7B   | Memory | 1 |       |       |
| 1.85622549929857e-37 | -0.444753208651574 |         |        |   | 0.658 | 0.747 |

|                      |                    |         |        |   |       |       |
|----------------------|--------------------|---------|--------|---|-------|-------|
| 3.30946444269943e-33 | 8                  | CHCHD2  | Memory | 1 |       |       |
| 2.03853113449268e-37 | -0.44733654111576  |         |        |   | 0.051 | 0.156 |
| 3.634497159687e-33   | 8                  | CD72    | Memory | 1 |       |       |
| 2.61444971768855e-37 | -0.332321079346501 |         |        |   | 0.047 | 0.159 |
| 4.66130240166692e-33 | 8                  | PAICS   | Memory | 1 |       |       |
| 2.76400922158243e-37 | -0.500936308634028 |         |        |   | 0.112 | 0.224 |
| 4.92795204115931e-33 | 8                  | GBP2    | Memory | 1 |       |       |
| 5.70199503748017e-37 | -0.430517787044627 |         |        |   | 0.144 | 0.294 |
| 1.01660869523234e-32 | 8                  | RRAS2   | Memory | 1 |       |       |
| 5.77225439815335e-37 | -0.500498058622534 |         |        |   | 0.457 | 0.588 |
| 1.02913523664676e-32 | 8                  | ANP32B  | Memory | 1 |       |       |
| 9.47610001219041e-37 | 0.434081041812939  |         |        |   | 0.189 | 0.101 |
| 1.68949387117343e-32 | 8                  | SCIMP   | Memory | 1 |       |       |
| 1.56376318361109e-36 | -0.419335200968896 |         |        |   | 0.51  | 0.644 |
| 2.78803338006021e-32 | 8                  | ATP5MD  | Memory | 1 |       |       |
| 1.85440976803406e-36 | -0.436883646646364 |         |        |   | 0.253 | 0.407 |
| 3.30622717542792e-32 | 8                  | RPA3    | Memory | 1 |       |       |
| 2.64199353850581e-36 | -0.469143650678448 |         |        |   | 0.319 | 0.469 |
| 4.71041027980202e-32 | 8                  | PRMT1   | Memory | 1 |       |       |
| 2.82828975949034e-36 | -0.391631414998516 |         |        |   | 0.364 | 0.525 |
| 5.04255781219533e-32 | 8                  | PSMB6   | Memory | 1 |       |       |
| 2.84213745831234e-36 | -0.49407288244499  |         |        |   | 0.509 | 0.642 |
| 5.06724687442507e-32 | 8                  | SET     | Memory | 1 |       |       |
| 3.84834752973245e-36 | 0.445346415837613  |         |        |   | 0.383 | 0.28  |
| 6.86121881075998e-32 | 8                  | CD82    | Memory | 1 |       |       |
| 6.53962558851184e-36 | -0.484617409329076 |         |        |   | 0.053 | 0.14  |
| 1.16594984617578e-31 | 8                  | FCER2   | Memory | 1 |       |       |
| 7.25959546646221e-36 | -0.495437979580086 |         |        |   | 0.207 | 0.35  |
| 1.29431327571555e-31 | 8                  | INSIG1  | Memory | 1 |       |       |
| 8.35247267688529e-36 | 0.456296948806715  |         |        |   | 0.51  | 0.415 |
| 1.48916235356188e-31 | 8                  | CTSH    | Memory | 1 |       |       |
| 9.36038279157061e-36 | -0.477093164425763 |         |        |   | 0.286 | 0.445 |
| 1.66886264790912e-31 | 8                  | RHOH    | Memory | 1 |       |       |
| 1.13133812075692e-35 | -0.462657899997534 |         |        |   | 0.145 | 0.282 |
| 2.01706273549752e-31 | 8                  | GADD45B | Memory | 1 |       |       |
| 1.84056135063901e-35 | -0.422443213114365 |         |        |   | 0.281 | 0.433 |
| 3.28153683205429e-31 | 8                  | CCT4    | Memory | 1 |       |       |
| 2.14603017851655e-35 | -0.427103662217007 |         |        |   | 0.41  | 0.556 |
| 3.82615720527715e-31 | 8                  | PSMA1   | Memory | 1 |       |       |
| 2.48827662391693e-35 | -0.396178580474611 |         |        |   | 0.132 | 0.275 |
| 4.4363483927815e-31  | 8                  | TOP1    | Memory | 1 |       |       |
| 3.62327823485137e-35 | 0.430276236510728  |         |        |   | 0.401 | 0.279 |
| 6.45994276491651e-31 | 8                  | GNG7    | Memory | 1 |       |       |
| 4.21033289317325e-35 | -0.510794255189364 |         |        |   | 0.276 | 0.423 |
| 7.50660251523859e-31 | 8                  | METAP2  | Memory | 1 |       |       |
| 5.74942998660114e-35 | 0.383441367488792  |         |        |   | 0.187 | 0.092 |
| 1.02506587231112e-30 | 8                  | CYSLTR1 | Memory | 1 |       |       |
| 6.37127312184507e-35 | -0.412198141030762 |         |        |   | 0.471 | 0.606 |
| 1.13593428489376e-30 | 8                  | PSMA2   | Memory | 1 |       |       |
| 6.42238547223848e-35 | -0.424864930877138 |         |        |   | 0.436 | 0.578 |

|                      |   |         |        |   |                    |             |
|----------------------|---|---------|--------|---|--------------------|-------------|
| 1.1450471058454e-30  | 8 | PARK7   | Memory | 1 |                    |             |
| 9.56938194703019e-35 |   |         |        |   | -0.416125675353767 | 0.265 0.416 |
| 1.70612510733601e-30 | 8 | HNRNPR  | Memory | 1 |                    |             |
| 9.84174066243075e-35 |   |         |        |   | -0.494625785142895 | 0.116 0.242 |
| 1.75468394270478e-30 | 8 | GCHFR   | Memory | 1 |                    |             |
| 1.09811581749007e-34 |   |         |        |   | -0.404304752452556 | 0.179 0.329 |
| 1.95783069100304e-30 | 8 | IMP4    | Memory | 1 |                    |             |
| 1.44494017934176e-34 |   |         |        |   | -0.415979568486432 | 0.249 0.399 |
| 2.57618384574842e-30 | 8 | PHB     | Memory | 1 |                    |             |
| 1.46102992232041e-34 |   |         |        |   | -0.419515900232783 | 0.24 0.394  |
| 2.60487024850506e-30 | 8 | SHMT2   | Memory | 1 |                    |             |
| 2.02494848804845e-34 |   |         |        |   | -0.488351206019177 | 0.381 0.517 |
| 3.61028065934159e-30 | 8 | PA2G4   | Memory | 1 |                    |             |
| 2.16764986242079e-34 |   |         |        |   | -0.542262419366843 | 0.374 0.502 |
| 3.86470293971002e-30 | 8 | HSPE1   | Memory | 1 |                    |             |
| 2.44364529250948e-34 |   |         |        |   | -0.387799332392013 | 0.338 0.496 |
| 4.35677519201515e-30 | 8 | CCT8    | Memory | 1 |                    |             |
| 2.54243540350633e-34 |   |         |        |   | -0.39263967278236  | 0.226 0.38  |
| 4.53290808091143e-30 | 8 | PSMC3   | Memory | 1 |                    |             |
| 4.78751453094212e-34 |   |         |        |   | -0.346574139064831 | 0.378 0.21  |
| 8.53565965721671e-30 | 8 | IGHG1   | Memory | 1 |                    |             |
| 5.34121148226547e-34 |   |         |        |   | 0.394256498094962  | 0.496 0.384 |
| 9.5228459517311e-30  | 8 | EVI2B   | Memory | 1 |                    |             |
| 6.27768560640339e-34 |   |         |        |   | -0.410095992657615 | 0.313 0.462 |
| 1.11924856676566e-29 | 8 | LSM5    | Memory | 1 |                    |             |
| 7.33913438623043e-34 |   |         |        |   | -0.350021600086262 | 0.127 0.267 |
| 1.30849426972102e-29 | 8 | PSMC2   | Memory | 1 |                    |             |
| 7.63036708177514e-34 |   |         |        |   | -0.440790709545092 | 0.306 0.448 |
| 1.36041814700969e-29 | 8 | CCT6A   | Memory | 1 |                    |             |
| 7.87068439392434e-34 |   |         |        |   | -0.415026608119432 | 0.51 0.633  |
| 1.40326432059277e-29 | 8 | ATP5F1B | Memory | 1 |                    |             |
| 1.04070592633511e-33 |   |         |        |   | -0.438357128005668 | 0.234 0.38  |
| 1.85547459606286e-29 | 8 | LCP1    | Memory | 1 |                    |             |
| 1.07438755093759e-33 |   |         |        |   | -0.368196135878703 | 0.235 0.391 |
| 1.91552556456663e-29 | 8 | SNRPC   | Memory | 1 |                    |             |
| 1.24417541585112e-33 |   |         |        |   | -0.346330076485371 | 0.08 0.202  |
| 2.21824034892096e-29 | 8 | UQCC2   | Memory | 1 |                    |             |
| 2.11882637125398e-33 |   |         |        |   | -0.38315906083115  | 0.378 0.539 |
| 3.77765553730871e-29 | 8 | SNRPB2  | Memory | 1 |                    |             |
| 3.23894668779055e-33 |   |         |        |   | -0.605541368215277 | 0.704 0.77  |
| 5.77471804966177e-29 | 8 | HMG1    | Memory | 1 |                    |             |
| 6.92093937655309e-33 |   |         |        |   | -0.379703424335754 | 0.3 0.451   |
| 1.23393428144565e-28 | 8 | PGAM1   | Memory | 1 |                    |             |
| 7.06039576493073e-33 |   |         |        |   | -0.311069676424008 | 0.069 0.188 |
| 1.2587979609295e-28  | 8 | LRRRC59 | Memory | 1 |                    |             |
| 7.47572390891144e-33 |   |         |        |   | -0.527464750756742 | 0.116 0.239 |
| 1.33284681571982e-28 | 8 | UBE2J1  | Memory | 1 |                    |             |
| 1.0355485110006e-32  |   |         |        |   | -0.388963836746684 | 0.17 0.31   |
| 1.84627944026298e-28 | 8 | PSMD11  | Memory | 1 |                    |             |
| 1.77713382412664e-32 |   |         |        |   | -0.480746620560147 | 0.139 0.269 |

|                      |                    |          |        |   |       |       |
|----------------------|--------------------|----------|--------|---|-------|-------|
| 3.16845189503538e-28 | 8                  | CD22     | Memory | 1 |       |       |
| 2.05855322231046e-32 | -0.411919175545099 |          |        |   | 0.629 | 0.726 |
| 3.67019454005732e-28 | 8                  | COX6C    | Memory | 1 |       |       |
| 2.09638558336681e-32 | -0.388165943421739 |          |        |   | 0.309 | 0.458 |
| 3.73764585658468e-28 | 8                  | VDAC1    | Memory | 1 |       |       |
| 2.85665625824239e-32 | -0.383254924438575 |          |        |   | 0.229 | 0.38  |
| 5.09313244282036e-28 | 8                  | PSMC1    | Memory | 1 |       |       |
| 4.40770834965789e-32 | -0.350225308251017 |          |        |   | 0.085 | 0.203 |
| 7.85850321660506e-28 | 8                  | EBNA1BP2 | Memory | 1 |       |       |
| 5.82351117035398e-32 | 0.384777292815027  |          |        |   | 0.321 | 0.215 |
| 1.03827380656241e-27 | 8                  | LY86     | Memory | 1 |       |       |
| 6.86383227133739e-32 | 0.421066676139391  |          |        |   | 0.471 | 0.373 |
| 1.22375265565674e-27 | 8                  | ZFAND6   | Memory | 1 |       |       |
| 8.35854310026039e-32 | -0.383709509129581 |          |        |   | 0.058 | 0.163 |
| 1.49024464934542e-27 | 8                  | APLP2    | Memory | 1 |       |       |
| 9.98147914304777e-32 | -0.326358340111075 |          |        |   | 0.057 | 0.16  |
| 1.77959791641399e-27 | 8                  | GAR1     | Memory | 1 |       |       |
| 1.10112805783491e-31 | 0.301349117744279  |          |        |   | 0.869 | 0.813 |
| 1.96320121431386e-27 | 8                  | NOP53    | Memory | 1 |       |       |
| 1.20315582226049e-31 | -0.470652517901959 |          |        |   | 0.261 | 0.407 |
| 2.14510651550822e-27 | 8                  | RPL22L1  | Memory | 1 |       |       |
| 1.34418888109143e-31 | -0.402418274116834 |          |        |   | 0.171 | 0.307 |
| 2.39655435609791e-27 | 8                  | ATP1B3   | Memory | 1 |       |       |
| 1.39540418560995e-31 | 0.336425656069567  |          |        |   | 0.329 | 0.207 |
| 2.48786612252397e-27 | 8                  | PLAC8    | Memory | 1 |       |       |
| 1.48819928530269e-31 | -0.420069663567074 |          |        |   | 0.303 | 0.445 |
| 2.65331050576617e-27 | 8                  | FDP5     | Memory | 1 |       |       |
| 1.719590443434e-31   | 0.379869006935756  |          |        |   | 0.201 | 0.108 |
| 3.06585780159847e-27 | 8                  | SESN3    | Memory | 1 |       |       |
| 2.0411080373893e-31  | -0.389184155680834 |          |        |   | 0.131 | 0.255 |
| 3.63909151986139e-27 | 8                  | GARS     | Memory | 1 |       |       |
| 2.45376390370661e-31 | -0.343363068387353 |          |        |   | 0.147 | 0.287 |
| 4.37481566391851e-27 | 8                  | PSMD14   | Memory | 1 |       |       |
| 2.95939057145574e-31 | -0.383095957976797 |          |        |   | 0.47  | 0.601 |
| 5.27629744984844e-27 | 8                  | XRCC6    | Memory | 1 |       |       |
| 3.68702534112455e-31 | -0.353156113044823 |          |        |   | 0.342 | 0.496 |
| 6.57359748069096e-27 | 8                  | MRPL52   | Memory | 1 |       |       |
| 4.48968026158792e-31 | -0.344032369437199 |          |        |   | 0.067 | 0.167 |
| 8.00465093838511e-27 | 8                  | MRT04    | Memory | 1 |       |       |
| 4.55321535074593e-31 | -0.438524100283213 |          |        |   | 0.312 | 0.445 |
| 8.11792764884492e-27 | 8                  | HMGA1    | Memory | 1 |       |       |
| 5.26823252849759e-31 | -0.334741022319051 |          |        |   | 0.664 | 0.775 |
| 9.39273177505835e-27 | 8                  | SEC62    | Memory | 1 |       |       |
| 5.52418835831339e-31 | 0.376640767921761  |          |        |   | 0.303 | 0.202 |
| 9.84907542403695e-27 | 8                  | PRKCB    | Memory | 1 |       |       |
| 7.70311152199321e-31 | -0.59236780580043  |          |        |   | 0.159 | 0.281 |
| 1.37338775325617e-26 | 8                  | HSPA5    | Memory | 1 |       |       |
| 7.96906627960439e-31 | -1.23193018695553  |          |        |   | 0.079 | 0.179 |
| 1.42080482699067e-26 | 8                  | MZB1     | Memory | 1 |       |       |
| 9.43511214368158e-31 | -0.416297411962104 |          |        |   | 0.283 | 0.434 |

|                      |   |                    |        |   |       |       |
|----------------------|---|--------------------|--------|---|-------|-------|
| 1.68218614409699e-26 | 8 | DNAJA1             | Memory | 1 |       |       |
| 1.3022961990428e-30  |   | -0.347630485975163 |        |   | 0.134 | 0.273 |
| 2.3218638932734e-26  | 8 | TXNDC17            | Memory | 1 |       |       |
| 1.39741755499126e-30 |   | -0.365228874984946 |        |   | 0.101 | 0.205 |
| 2.49145575879392e-26 | 8 | NPM3               | Memory | 1 |       |       |
| 1.67432275764066e-30 |   | -0.352625628628854 |        |   | 0.219 | 0.368 |
| 2.98515004459753e-26 | 8 | ELOC               | Memory | 1 |       |       |
| 1.74384779779973e-30 |   | -0.401894279207717 |        |   | 0.062 | 0.173 |
| 3.10910623869714e-26 | 8 | CCDC88A            | Memory | 1 |       |       |
| 2.13183497758105e-30 |   | -0.363770338667726 |        |   | 0.365 | 0.509 |
| 3.80084858152925e-26 | 8 | EIF3I              | Memory | 1 |       |       |
| 2.18861066420369e-30 |   | -0.474092475473024 |        |   | 0.139 | 0.274 |
| 3.90207395320876e-26 | 8 | PIM1               | Memory | 1 |       |       |
| 4.04084981046123e-30 |   | -0.379479639614813 |        |   | 0.198 | 0.343 |
| 7.20443112707133e-26 | 8 | NDUFC1             | Memory | 1 |       |       |
| 4.53210170732044e-30 |   | -0.370090772690843 |        |   | 0.224 | 0.373 |
| 8.0802841339816e-26  | 8 | EWSR1              | Memory | 1 |       |       |
| 5.17896753283051e-30 |   | -0.37019414339837  |        |   | 0.276 | 0.425 |
| 9.23358121428352e-26 | 8 | EIF6               | Memory | 1 |       |       |
| 5.47297915995998e-30 |   | -0.376528519882187 |        |   | 0.438 | 0.576 |
| 9.75777454429264e-26 | 8 | RBM8A              | Memory | 1 |       |       |
| 7.74223624259991e-30 |   | -0.345366481671733 |        |   | 0.338 | 0.491 |
| 1.38036329969314e-25 | 8 | UBE2L3             | Memory | 1 |       |       |
| 8.41989917759978e-30 |   | -0.363073112700709 |        |   | 0.151 | 0.281 |
| 1.50118382437427e-25 | 8 | ATOX1              | Memory | 1 |       |       |
| 8.90758456824218e-30 |   | -0.352433914448082 |        |   | 0.117 | 0.243 |
| 1.5881332526719e-25  | 8 | HNRNPAB            | Memory | 1 |       |       |
| 1.27830318404215e-29 |   | -0.360706281885917 |        |   | 0.153 | 0.289 |
| 2.27908674682875e-25 | 8 | PRDX3              | Memory | 1 |       |       |
| 1.68493234476242e-29 |   | -0.394529769051408 |        |   | 0.447 | 0.571 |
| 3.00406587747692e-25 | 8 | UQCRQ              | Memory | 1 |       |       |
| 1.69710472701397e-29 |   | -0.352096472459988 |        |   | 0.352 | 0.495 |
| 3.02576801779322e-25 | 8 | CCT3               | Memory | 1 |       |       |
| 1.8581278700341e-29  |   | -0.369996077257815 |        |   | 0.096 | 0.212 |
| 3.31285617948379e-25 | 8 | GNL3               | Memory | 1 |       |       |
| 2.07539597769108e-29 |   | -0.363921954563457 |        |   | 0.207 | 0.345 |
| 3.70022348862543e-25 | 8 | STRAP              | Memory | 1 |       |       |
| 2.31715735334332e-29 |   | -0.331706000073548 |        |   | 0.085 | 0.192 |
| 4.13125984527581e-25 | 8 | YARS               | Memory | 1 |       |       |
| 5.6699355791375e-29  |   | -0.354664176624609 |        |   | 0.066 | 0.169 |
| 1.01089281440442e-24 | 8 | DEF8               | Memory | 1 |       |       |
| 6.77023510183783e-29 |   | -0.328084557584252 |        |   | 0.103 | 0.222 |
| 1.20706521630667e-24 | 8 | MRPL12             | Memory | 1 |       |       |
| 6.81905613610888e-29 |   | -0.337913640939394 |        |   | 0.124 | 0.25  |
| 1.21576951850685e-24 | 8 | AK2                | Memory | 1 |       |       |
| 7.55653568242907e-29 |   | -0.470957976477267 |        |   | 0.174 | 0.308 |
| 1.34725474682028e-24 | 8 | BCL7A              | Memory | 1 |       |       |
| 7.97602853016666e-29 |   | 0.364203789783269  |        |   | 0.274 | 0.17  |
| 1.42204612664341e-24 | 8 | MARCH1             | Memory | 1 |       |       |
| 8.17247481773553e-29 |   | -0.45806914583     |        |   | 0.089 | 0.175 |

|                      |                    |                 |   |       |       |
|----------------------|--------------------|-----------------|---|-------|-------|
| 1.45707053525407e-24 | 8                  | TNFRSF18 Memory | 1 |       |       |
| 1.15850208549605e-28 | -0.351417748878832 |                 |   | 0.248 | 0.393 |
| 2.0654933682309e-24  | 8                  | NDUFS6 Memory   | 1 |       |       |
| 1.34143173527668e-28 | -0.349006352726366 |                 |   | 0.502 | 0.625 |
| 2.39163864082479e-24 | 8                  | ACTR3 Memory    | 1 |       |       |
| 1.53991970304645e-28 | -0.341674891349042 |                 |   | 0.087 | 0.192 |
| 2.74552283856151e-24 | 8                  | GPATCH4 Memory  | 1 |       |       |
| 1.55680537967778e-28 | -0.371564936653833 |                 |   | 0.261 | 0.404 |
| 2.77562831142752e-24 | 8                  | PSMA3 Memory    | 1 |       |       |
| 1.6212621273054e-28  | -0.370285140191964 |                 |   | 0.209 | 0.352 |
| 2.89054824677279e-24 | 8                  | RBM17 Memory    | 1 |       |       |
| 1.6970639293059e-28  | -0.329626036613868 |                 |   | 0.18  | 0.319 |
| 3.02569527955949e-24 | 8                  | STOML2 Memory   | 1 |       |       |
| 1.90997410366833e-28 | -0.394864603264936 |                 |   | 0.32  | 0.449 |
| 3.40529282943026e-24 | 8                  | C1QBP Memory    | 1 |       |       |
| 3.01403235969098e-28 | -0.378037111564749 |                 |   | 0.577 | 0.681 |
| 5.37371829409304e-24 | 8                  | HNRNPA3 Memory  | 1 |       |       |
| 3.33741989433719e-28 | -0.355833643559102 |                 |   | 0.187 | 0.328 |
| 5.95028592961377e-24 | 8                  | HSBP1 Memory    | 1 |       |       |
| 3.68715960240121e-28 | -0.348314760484131 |                 |   | 0.375 | 0.515 |
| 6.57383685512111e-24 | 8                  | PSMD8 Memory    | 1 |       |       |
| 4.49506165517318e-28 | -0.384837072780022 |                 |   | 0.502 | 0.62  |
| 8.01424542500826e-24 | 8                  | SERBP1 Memory   | 1 |       |       |
| 6.97089995731241e-28 | 0.370247236948671  |                 |   | 0.312 | 0.226 |
| 1.24284175338923e-23 | 8                  | ATM Memory      | 1 |       |       |
| 1.0893285593367e-27  | 0.343845891452282  |                 |   | 0.428 | 0.328 |
| 1.9421638884414e-23  | 8                  | RIPOR2 Memory   | 1 |       |       |
| 1.20282128443789e-27 | -0.362698057715126 |                 |   | 0.264 | 0.409 |
| 2.14451006802432e-23 | 8                  | BZW1 Memory     | 1 |       |       |
| 1.22292839417967e-27 | -0.334901183503137 |                 |   | 0.232 | 0.376 |
| 2.18035903398293e-23 | 8                  | PSMD7 Memory    | 1 |       |       |
| 1.23777329464905e-27 | -0.355565113076616 |                 |   | 0.211 | 0.343 |
| 2.20682600702979e-23 | 8                  | MIF Memory      | 1 |       |       |
| 1.24770396622568e-27 | -0.336393212597834 |                 |   | 0.306 | 0.451 |
| 2.22453140138376e-23 | 8                  | PSMB7 Memory    | 1 |       |       |
| 1.2513592405299e-27  | -0.431056137890999 |                 |   | 0.492 | 0.623 |
| 2.23104838994075e-23 | 8                  | CLEC2D Memory   | 1 |       |       |
| 1.36760879532816e-27 | -0.387123035874285 |                 |   | 0.267 | 0.404 |
| 2.43830972119057e-23 | 8                  | BLOC1S2 Memory  | 1 |       |       |
| 1.53365546038401e-27 | -0.365725121377544 |                 |   | 0.03  | 0.113 |
| 2.73435432031865e-23 | 8                  | CD9 Memory      | 1 |       |       |
| 2.86457204244925e-27 | -0.323916037357207 |                 |   | 0.197 | 0.337 |
| 5.10724549448277e-23 | 8                  | ACP1 Memory     | 1 |       |       |
| 3.01678221277644e-27 | -0.330981628475318 |                 |   | 0.27  | 0.418 |
| 5.37862100715912e-23 | 8                  | RNF181 Memory   | 1 |       |       |
| 3.88738549209099e-27 | 0.356746131958479  |                 |   | 0.56  | 0.468 |
| 6.93081959384903e-23 | 8                  | GPSM3 Memory    | 1 |       |       |
| 3.92439912052114e-27 | -0.319442758152651 |                 |   | 0.122 | 0.244 |
| 6.99681119197714e-23 | 8                  | DDX1 Memory     | 1 |       |       |
| 4.87676607120575e-27 | -0.332361939508564 |                 |   | 0.128 | 0.246 |

|                      |                    |           |        |   |       |       |
|----------------------|--------------------|-----------|--------|---|-------|-------|
| 8.69478622835273e-23 | 8                  | POLD2     | Memory | 1 |       |       |
| 7.58797598740083e-27 | -0.421781949044827 |           |        |   | 0.369 | 0.506 |
| 1.35286023879369e-22 | 8                  | FOXP1     | Memory | 1 |       |       |
| 8.13161523844576e-27 | -0.487008175830754 |           |        |   | 0.242 | 0.357 |
| 1.44978568086249e-22 | 8                  | TUBB4B    | Memory | 1 |       |       |
| 1.08495591206179e-26 | -0.357151572370761 |           |        |   | 0.172 | 0.283 |
| 1.93436789561496e-22 | 8                  | WARS      | Memory | 1 |       |       |
| 1.2895743067864e-26  | -0.378099800574338 |           |        |   | 0.482 | 0.599 |
| 2.29918203156948e-22 | 8                  | SRSF2     | Memory | 1 |       |       |
| 1.39783265933565e-26 | -0.369886478477741 |           |        |   | 0.54  | 0.649 |
| 2.49219584832953e-22 | 8                  | HNRNPC    | Memory | 1 |       |       |
| 1.54951256343621e-26 | -0.33556583155229  |           |        |   | 0.567 | 0.679 |
| 2.76262594935041e-22 | 8                  | ATP5ME    | Memory | 1 |       |       |
| 1.88494096048534e-26 | -0.309068618505191 |           |        |   | 0.057 | 0.149 |
| 3.36066123844932e-22 | 8                  | PRDX4     | Memory | 1 |       |       |
| 1.89473685273941e-26 | -0.325735461268966 |           |        |   | 0.139 | 0.265 |
| 3.37812633474909e-22 | 8                  | AK6       | Memory | 1 |       |       |
| 2.18299779071714e-26 | -0.400016648646617 |           |        |   | 0.802 | 0.847 |
| 3.8920667610696e-22  | 8                  | HNRNPA2B1 | Memory | 1 |       |       |
| 2.19330259957584e-26 | -0.318281733313122 |           |        |   | 0.088 | 0.186 |
| 3.91043920478376e-22 | 8                  | TUBA1C    | Memory | 1 |       |       |
| 3.88416158440041e-26 | 0.336838396937819  |           |        |   | 0.148 | 0.073 |
| 6.92507168882749e-22 | 8                  | CAPN2     | Memory | 1 |       |       |
| 4.85136321311344e-26 | 0.394678474931651  |           |        |   | 0.378 | 0.295 |
| 8.64949547265995e-22 | 8                  | BLK       | Memory | 1 |       |       |
| 7.41188943838409e-26 | -0.35487915728796  |           |        |   | 0.314 | 0.451 |
| 1.3214657679695e-21  | 8                  | ATP5F1C   | Memory | 1 |       |       |
| 8.50182843216903e-26 | -0.322294052385025 |           |        |   | 0.141 | 0.267 |
| 1.51579099117142e-21 | 8                  | ATXN10    | Memory | 1 |       |       |
| 9.77893555805369e-26 | -0.324354173620632 |           |        |   | 0.057 | 0.148 |
| 1.74348642064539e-21 | 8                  | MID1IP1   | Memory | 1 |       |       |
| 1.38451159285787e-25 | -0.361090832959889 |           |        |   | 0.454 | 0.569 |
| 2.4684457189063e-21  | 8                  | SNRPB     | Memory | 1 |       |       |
| 1.58049325933159e-25 | -0.32663063038812  |           |        |   | 0.309 | 0.449 |
| 2.8178614320623e-21  | 8                  | CCT7      | Memory | 1 |       |       |
| 1.83747369958375e-25 | -0.425150661511289 |           |        |   | 0.131 | 0.247 |
| 3.27603185898787e-21 | 8                  | KPNA2     | Memory | 1 |       |       |
| 3.14133569363264e-25 | -0.318740449357487 |           |        |   | 0.374 | 0.502 |
| 5.60068740817764e-21 | 8                  | TUFM      | Memory | 1 |       |       |
| 3.14491639720521e-25 | -0.305703720000673 |           |        |   | 0.48  | 0.61  |
| 5.60707144457716e-21 | 8                  | NOP10     | Memory | 1 |       |       |
| 3.18577985875546e-25 | -0.324260205967403 |           |        |   | 0.173 | 0.298 |
| 5.6799269101751e-21  | 8                  | SSRP1     | Memory | 1 |       |       |
| 3.67645535377113e-25 | -0.370389417012532 |           |        |   | 0.119 | 0.22  |
| 6.55475225023855e-21 | 8                  | NFKBIE    | Memory | 1 |       |       |
| 4.25661130817848e-25 | -0.303741338672184 |           |        |   | 0.124 | 0.24  |
| 7.5891123013514e-21  | 8                  | EIF2S1    | Memory | 1 |       |       |
| 4.53182565246313e-25 | -0.345259027739106 |           |        |   | 0.292 | 0.425 |
| 8.07979195577652e-21 | 8                  | MAGOH     | Memory | 1 |       |       |
| 4.75454992124226e-25 | -0.319995658666908 |           |        |   | 0.39  | 0.528 |



|                      |                    |                  |       |       |
|----------------------|--------------------|------------------|-------|-------|
| 8.47688705458283e-21 | 8                  | SELEN0T Memory 1 |       |       |
| 5.75350850290743e-25 | -0.314423243043681 |                  | 0.219 | 0.353 |
| 1.02579303098336e-20 | 8                  | CYC1 Memory 1    |       |       |
| 7.03330798727969e-25 | 0.361520823956449  |                  | 0.285 | 0.199 |
| 1.2539684810521e-20  | 8                  | BIN1 Memory 1    |       |       |
| 7.6709768655573e-25  | 0.371452127948785  |                  | 0.55  | 0.478 |
| 1.36765846536021e-20 | 8                  | ISCU Memory 1    |       |       |
| 7.7820910540951e-25  | -0.358339191101625 |                  | 0.622 | 0.706 |
| 1.38746901403462e-20 | 8                  | TPI1 Memory 1    |       |       |
| 1.05847814410134e-24 | -0.307671613345857 |                  | 0.966 | 0.964 |
| 1.88716068311827e-20 | 8                  | EIF1 Memory 1    |       |       |
| 1.07906144644874e-24 | -0.305405768014193 |                  | 0.119 | 0.232 |
| 1.92385865287346e-20 | 8                  | MRPL3 Memory 1   |       |       |
| 1.16433422949922e-24 | -0.322884090363299 |                  | 0.438 | 0.571 |
| 2.07589149777417e-20 | 8                  | RAC1 Memory 1    |       |       |
| 1.29863452786613e-24 | -0.313294988377142 |                  | 0.258 | 0.394 |
| 2.31533549973252e-20 | 8                  | NOL7 Memory 1    |       |       |
| 1.31142765389591e-24 | -0.388080748436895 |                  | 0.105 | 0.199 |
| 2.33814436413102e-20 | 8                  | CLEC2B Memory 1  |       |       |
| 1.31513985849152e-24 | 0.331230222734156  |                  | 0.2   | 0.123 |
| 2.34476285370453e-20 | 8                  | ZBTB20 Memory 1  |       |       |
| 1.73695061253001e-24 | -0.300492079106653 |                  | 0.112 | 0.229 |
| 3.09680924707975e-20 | 8                  | DAZAP1 Memory 1  |       |       |
| 1.78522004248622e-24 | -0.400765463993921 |                  | 0.15  | 0.26  |
| 3.18286881374869e-20 | 8                  | SRGN Memory 1    |       |       |
| 1.82607755595283e-24 | -0.307441705324207 |                  | 0.101 | 0.205 |
| 3.2557136745083e-20  | 8                  | TOMM40 Memory 1  |       |       |
| 1.87956020541189e-24 | -0.351465347428914 |                  | 0.292 | 0.425 |
| 3.35106789022887e-20 | 8                  | HNRNPD Memory 1  |       |       |
| 1.93162817645053e-24 | -0.316642253834922 |                  | 0.047 | 0.124 |
| 3.44389987579365e-20 | 8                  | ZNF318 Memory 1  |       |       |
| 2.39394113934703e-24 | -0.339687759513778 |                  | 0.458 | 0.59  |
| 4.26815765734181e-20 | 8                  | NDUFV2 Memory 1  |       |       |
| 2.77769804073933e-24 | -0.328349220766314 |                  | 0.092 | 0.189 |
| 4.95235783683415e-20 | 8                  | WDR43 Memory 1   |       |       |
| 3.48791164781964e-24 | -0.312603513738743 |                  | 0.174 | 0.299 |
| 6.21859767689763e-20 | 8                  | ILF3 Memory 1    |       |       |
| 3.65583448300599e-24 | 0.328055714429261  |                  | 0.229 | 0.141 |
| 6.51798729975138e-20 | 8                  | SUN2 Memory 1    |       |       |
| 4.19713962576365e-24 | -0.371088350023201 |                  | 0.27  | 0.402 |
| 7.48308023877402e-20 | 8                  | NUCKS1 Memory 1  |       |       |
| 4.86744900448638e-24 | -0.338368146009258 |                  | 0.319 | 0.449 |
| 8.67817483009877e-20 | 8                  | ATP5MC1 Memory 1 |       |       |
| 5.52362896844875e-24 | -0.487675905319373 |                  | 0.251 | 0.364 |
| 9.84807808784729e-20 | 8                  | H2AFV Memory 1   |       |       |
| 7.19580100694516e-24 | -0.308535670290033 |                  | 0.501 | 0.631 |
| 1.28293936152825e-19 | 8                  | SELEN0H Memory 1 |       |       |
| 8.69063861120103e-24 | -0.404396009129217 |                  | 0.083 | 0.179 |
| 1.54945395799103e-19 | 8                  | PDIA4 Memory 1   |       |       |
| 1.13267444307398e-23 | -0.315966626692298 |                  | 0.363 | 0.496 |

|                      |                    |          |        |   |       |       |
|----------------------|--------------------|----------|--------|---|-------|-------|
| 2.01944526455659e-19 | 8                  | SF3B6    | Memory | 1 |       |       |
| 1.51191318522271e-23 | -0.334155181185595 |          |        |   | 0.171 | 0.297 |
| 2.69559001793357e-19 | 8                  | HSPA4    | Memory | 1 |       |       |
| 1.61104179562665e-23 | 0.334683095225787  |          |        |   | 0.163 | 0.088 |
| 2.87232641742276e-19 | 8                  | AHNAK    | Memory | 1 |       |       |
| 1.6616202177883e-23  | -0.335582306502388 |          |        |   | 0.242 | 0.373 |
| 2.96250268629477e-19 | 8                  | PFDN2    | Memory | 1 |       |       |
| 1.72384258474981e-23 | -0.305809591872218 |          |        |   | 0.303 | 0.439 |
| 3.07343894435044e-19 | 8                  | NDUFB7   | Memory | 1 |       |       |
| 1.93803291938727e-23 | -0.320902551056058 |          |        |   | 0.742 | 0.808 |
| 3.45531889197556e-19 | 8                  | HNRNPK   | Memory | 1 |       |       |
| 2.37293770452473e-23 | -0.313574682776645 |          |        |   | 0.511 | 0.622 |
| 4.23071063339715e-19 | 8                  | NDUFA13  | Memory | 1 |       |       |
| 3.20633801367395e-23 | -0.425487054551668 |          |        |   | 0.038 | 0.112 |
| 5.71658004457929e-19 | 8                  | VPREB3   | Memory | 1 |       |       |
| 3.38391347199622e-23 | -0.313837636736235 |          |        |   | 0.196 | 0.327 |
| 6.03317932922206e-19 | 8                  | RNASEH2C | Memory | 1 |       |       |
| 4.41904852129539e-23 | -0.307682588862384 |          |        |   | 0.555 | 0.663 |
| 7.87872160861755e-19 | 8                  | UBL5     | Memory | 1 |       |       |
| 4.54209951528883e-23 | -0.337451001482304 |          |        |   | 0.043 | 0.121 |
| 8.09810922580845e-19 | 8                  | UBE2S    | Memory | 1 |       |       |
| 4.62655387081409e-23 | -2.05485969267397  |          |        |   | 0.609 | 0.444 |
| 8.24868289627444e-19 | 8                  | IGHG3    | Memory | 1 |       |       |
| 5.66921085969509e-23 | -0.311361002535678 |          |        |   | 0.19  | 0.321 |
| 1.01076360417504e-18 | 8                  | NDUFAF3  | Memory | 1 |       |       |
| 8.84829959260244e-23 | -1.38453244865673  |          |        |   | 0.237 | 0.305 |
| 1.57756333436509e-18 | 8                  | HMGB2    | Memory | 1 |       |       |
| 9.45801169934446e-23 | -0.350262158867992 |          |        |   | 0.351 | 0.481 |
| 1.68626890587612e-18 | 8                  | TNFAIP8  | Memory | 1 |       |       |
| 1.06612069771177e-22 | -0.387734802884258 |          |        |   | 0.129 | 0.221 |
| 1.90078659195031e-18 | 8                  | EIF4EBP1 | Memory | 1 |       |       |
| 1.12888961005094e-22 | -0.358912779377055 |          |        |   | 0.393 | 0.514 |
| 2.01269728575981e-18 | 8                  | TALD01   | Memory | 1 |       |       |
| 1.23751394586391e-22 | -0.347010524878211 |          |        |   | 0.872 | 0.896 |
| 2.20636361408077e-18 | 8                  | PPIA     | Memory | 1 |       |       |
| 1.49046509699826e-22 | -0.563062197894743 |          |        |   | 0.116 | 0.212 |
| 2.6573502214382e-18  | 8                  | FOS      | Memory | 1 |       |       |
| 1.62605976489589e-22 | -0.313797380146202 |          |        |   | 0.552 | 0.661 |
| 2.89910195483288e-18 | 8                  | RBX1     | Memory | 1 |       |       |
| 2.53490166805324e-22 | -0.362582956152187 |          |        |   | 0.25  | 0.366 |
| 4.51947618397212e-18 | 8                  | HSPA9    | Memory | 1 |       |       |
| 2.67276097883228e-22 | 0.330263618559183  |          |        |   | 0.367 | 0.281 |
| 4.76526554916007e-18 | 8                  | ACAP1    | Memory | 1 |       |       |
| 2.71949364334159e-22 | -0.363250605008031 |          |        |   | 0.639 | 0.71  |
| 4.84858521671372e-18 | 8                  | NDUFA4   | Memory | 1 |       |       |
| 3.04774512107619e-22 | -0.341623034066138 |          |        |   | 0.128 | 0.238 |
| 5.43382477636674e-18 | 8                  | ZCCHC7   | Memory | 1 |       |       |
| 3.69153531189611e-22 | -0.351663819371578 |          |        |   | 0.098 | 0.196 |
| 6.58163830757957e-18 | 8                  | MANF     | Memory | 1 |       |       |
| 7.34258444914689e-22 | -0.319412490707565 |          |        |   | 0.305 | 0.432 |

|                      |                    |         |        |   |       |       |
|----------------------|--------------------|---------|--------|---|-------|-------|
| 1.3091093814384e-17  | 8                  | MINOS1  | Memory | 1 |       |       |
| 8.23431996443174e-22 | -0.344200206683022 |         |        |   | 0.905 | 0.919 |
| 1.46809690645854e-17 | 8                  | CFL1    | Memory | 1 |       |       |
| 8.52172818825034e-22 | -0.315857701562491 |         |        |   | 0.186 | 0.306 |
| 1.51933891868315e-17 | 8                  | NOP58   | Memory | 1 |       |       |
| 8.90993501748551e-22 | -0.318542897051639 |         |        |   | 0.121 | 0.221 |
| 1.58855231426749e-17 | 8                  | HMGCS1  | Memory | 1 |       |       |
| 1.07973761389053e-21 | -0.352078024804629 |         |        |   | 0.156 | 0.267 |
| 1.92506419180543e-17 | 8                  | FKBP2   | Memory | 1 |       |       |
| 1.37287009536931e-21 | 0.316202139599213  |         |        |   | 0.199 | 0.12  |
| 2.44769009303394e-17 | 8                  | DDAH2   | Memory | 1 |       |       |
| 1.40663684179939e-21 | 0.349940034209569  |         |        |   | 0.238 | 0.168 |
| 2.50789282524413e-17 | 8                  | MFS10   | Memory | 1 |       |       |
| 1.73784790842444e-21 | -0.359962931116409 |         |        |   | 0.378 | 0.494 |
| 3.09840903592993e-17 | 8                  | CBX3    | Memory | 1 |       |       |
| 1.8541570588407e-21  | -0.372569483967188 |         |        |   | 0.372 | 0.488 |
| 3.30577662020708e-17 | 8                  | RPS27L  | Memory | 1 |       |       |
| 2.12306288767737e-21 | -0.308474563064068 |         |        |   | 0.507 | 0.619 |
| 3.78520882243998e-17 | 8                  | UQCR10  | Memory | 1 |       |       |
| 2.46669577951094e-21 | -0.324542685438774 |         |        |   | 0.295 | 0.419 |
| 4.39787190529005e-17 | 8                  | HDAC1   | Memory | 1 |       |       |
| 2.77771082935383e-21 | -0.315259953206093 |         |        |   | 0.349 | 0.473 |
| 4.95238063765494e-17 | 8                  | PRDX5   | Memory | 1 |       |       |
| 3.12464270604172e-21 | 0.350046645882722  |         |        |   | 0.198 | 0.139 |
| 5.57092548060178e-17 | 8                  | MYO1G   | Memory | 1 |       |       |
| 3.49054687138568e-21 | -0.350671129236138 |         |        |   | 0.196 | 0.313 |
| 6.22329601699353e-17 | 8                  | CALR    | Memory | 1 |       |       |
| 3.75052628435406e-21 | -0.331066387925655 |         |        |   | 0.859 | 0.884 |
| 6.68681331237486e-17 | 8                  | H3F3B   | Memory | 1 |       |       |
| 7.2602705539361e-21  | -0.326373512162823 |         |        |   | 0.317 | 0.439 |
| 1.29443363706127e-16 | 8                  | EIF5B   | Memory | 1 |       |       |
| 8.56000539904176e-21 | -0.335221299484547 |         |        |   | 0.051 | 0.123 |
| 1.52616336259515e-16 | 8                  | LPP     | Memory | 1 |       |       |
| 1.23221901055221e-20 | 0.322753959562016  |         |        |   | 0.3   | 0.193 |
| 2.19692327391353e-16 | 8                  | ACP5    | Memory | 1 |       |       |
| 2.01128629477225e-20 | -0.312548078785913 |         |        |   | 0.14  | 0.244 |
| 3.58592233494945e-16 | 8                  | SLC38A1 | Memory | 1 |       |       |
| 2.8701369063507e-20  | -0.342912801404861 |         |        |   | 0.357 | 0.472 |
| 5.11716709033266e-16 | 8                  | CYCS    | Memory | 1 |       |       |
| 3.73816517167319e-20 | -0.334676832061866 |         |        |   | 0.344 | 0.461 |
| 6.66477468457614e-16 | 8                  | COX17   | Memory | 1 |       |       |
| 4.00648252559275e-20 | -0.323547240490077 |         |        |   | 0.296 | 0.427 |
| 7.14315769487932e-16 | 8                  | TMEM123 | Memory | 1 |       |       |
| 4.03107106109031e-20 | -0.528626794836896 |         |        |   | 0.069 | 0.133 |
| 7.18699659481792e-16 | 8                  | MYC     | Memory | 1 |       |       |
| 4.36722229403933e-20 | -0.481187816572211 |         |        |   | 0.326 | 0.412 |
| 7.78632062804272e-16 | 8                  | TXN     | Memory | 1 |       |       |
| 4.71647568254549e-20 | -0.315348679905419 |         |        |   | 0.207 | 0.326 |
| 8.40900449441035e-16 | 8                  | NAA38   | Memory | 1 |       |       |
| 5.68042086431501e-20 | -0.354406727937752 |         |        |   | 0.184 | 0.292 |

|                      |                    |         |        |   |       |       |
|----------------------|--------------------|---------|--------|---|-------|-------|
| 1.01276223589872e-15 | 8                  | RUBCNL  | Memory | 1 |       |       |
| 9.13537110131282e-20 | -0.373344391722088 |         |        |   | 0.146 | 0.245 |
| 1.62874531365306e-15 | 8                  | PHACTR1 | Memory | 1 |       |       |
| 9.37862642419292e-20 | 0.307208695290108  |         |        |   | 0.134 | 0.084 |
| 1.67211530516935e-15 | 8                  | EBI3    | Memory | 1 |       |       |
| 1.08468084126291e-19 | -0.321674452333832 |         |        |   | 0.517 | 0.612 |
| 1.93387747188764e-15 | 8                  | POLR2L  | Memory | 1 |       |       |
| 1.47585396761433e-19 | -0.326240805891931 |         |        |   | 0.157 | 0.269 |
| 2.63130003885958e-15 | 8                  | FAM3C   | Memory | 1 |       |       |
| 1.48201831859782e-19 | -0.335715149774672 |         |        |   | 0.171 | 0.275 |
| 2.64229046022806e-15 | 8                  | SMS     | Memory | 1 |       |       |
| 1.51968870277088e-19 | -0.307215742847707 |         |        |   | 0.493 | 0.607 |
| 2.7094529881702e-15  | 8                  | LSM7    | Memory | 1 |       |       |
| 2.00695897756555e-19 | -0.307545128229172 |         |        |   | 0.811 | 0.862 |
| 3.57820716110162e-15 | 8                  | UBB     | Memory | 1 |       |       |
| 2.00982257653729e-19 | -0.318833685650848 |         |        |   | 0.216 | 0.326 |
| 3.58331267170833e-15 | 8                  | NOP56   | Memory | 1 |       |       |
| 3.12136058115753e-19 | -0.344667838675425 |         |        |   | 0.151 | 0.25  |
| 5.56507378014576e-15 | 8                  | CKS1B   | Memory | 1 |       |       |
| 9.44249376183301e-19 | -0.32894030523852  |         |        |   | 0.242 | 0.354 |
| 1.68350221279721e-14 | 8                  | PDIA6   | Memory | 1 |       |       |
| 1.41558848379515e-18 | -0.303435933774143 |         |        |   | 0.253 | 0.37  |
| 2.52385270775837e-14 | 8                  | PDIA3   | Memory | 1 |       |       |
| 1.53301939158596e-18 | -0.301481286495283 |         |        |   | 0.151 | 0.25  |
| 2.73322027325861e-14 | 8                  | DKC1    | Memory | 1 |       |       |
| 1.78831599240711e-18 | -0.31528755398731  |         |        |   | 0.14  | 0.24  |
| 3.18838858286264e-14 | 8                  | DSTN    | Memory | 1 |       |       |
| 2.02660684723761e-18 | -0.324106362355184 |         |        |   | 0.072 | 0.149 |
| 3.61323734793994e-14 | 8                  | SDF2L1  | Memory | 1 |       |       |
| 2.33311862143051e-18 | 0.311919368828213  |         |        |   | 0.234 | 0.161 |
| 4.15971719014847e-14 | 8                  | MARCKS  | Memory | 1 |       |       |
| 3.05906751870405e-18 | -0.302114128803025 |         |        |   | 0.365 | 0.473 |
| 5.45401147909745e-14 | 8                  | SNRPF   | Memory | 1 |       |       |
| 4.37784812488937e-18 | -0.389990494938512 |         |        |   | 0.275 | 0.379 |
| 7.80526542186526e-14 | 8                  | ACADM   | Memory | 1 |       |       |
| 6.50542728491376e-18 | -0.506843199405701 |         |        |   | 0.225 | 0.319 |
| 1.15985263062727e-13 | 8                  | CD69    | Memory | 1 |       |       |
| 6.65978875516187e-18 | -0.32853375335413  |         |        |   | 0.223 | 0.333 |
| 1.18737373715781e-13 | 8                  | HNRNPH1 | Memory | 1 |       |       |
| 9.26998530442657e-18 | 0.330935575607166  |         |        |   | 0.365 | 0.302 |
| 1.65274567992621e-13 | 8                  | CD99    | Memory | 1 |       |       |
| 1.05398419101457e-17 | -0.490771565352487 |         |        |   | 0.84  | 0.857 |
| 1.87914841415988e-13 | 8                  | CD79B   | Memory | 1 |       |       |
| 1.32884793976189e-17 | -0.418898694730399 |         |        |   | 0.829 | 0.852 |
| 2.36920299180148e-13 | 8                  | ATP5MG  | Memory | 1 |       |       |
| 1.65528902183936e-17 | -0.315886453680416 |         |        |   | 0.226 | 0.336 |
| 2.95121479703739e-13 | 8                  | BPTF    | Memory | 1 |       |       |
| 4.89157876594528e-17 | -0.333460821121648 |         |        |   | 0.173 | 0.278 |
| 8.72119578180384e-13 | 8                  | NCF1    | Memory | 1 |       |       |
| 5.35521535776519e-17 | -0.327714121376154 |         |        |   | 0.151 | 0.244 |

|                      |                    |          |        |   |       |       |
|----------------------|--------------------|----------|--------|---|-------|-------|
| 9.54781346135956e-13 | 8                  | MYDGF    | Memory | 1 |       |       |
| 5.39033959803957e-17 | -1.28600086754519  |          |        |   | 0.345 | 0.425 |
| 9.61043646934474e-13 | 8                  | HIST1H4C | Memory | 1 |       |       |
| 6.88472216783577e-17 | -0.351642487140651 |          |        |   | 0.389 | 0.496 |
| 1.22747711530344e-12 | 8                  | C4orf3   | Memory | 1 |       |       |
| 7.11077334519024e-17 | -0.319070813734142 |          |        |   | 0.255 | 0.365 |
| 1.26777977971397e-12 | 8                  | TPD52    | Memory | 1 |       |       |
| 1.31220267104149e-16 | -0.387396453313851 |          |        |   | 0.901 | 0.899 |
| 2.33952614219987e-12 | 8                  | PFN1     | Memory | 1 |       |       |
| 2.70376629106104e-16 | 0.309228532579685  |          |        |   | 0.201 | 0.161 |
| 4.82054492033273e-12 | 8                  | LYPLAL1  | Memory | 1 |       |       |
| 7.95203097528608e-16 | -0.340803081350958 |          |        |   | 0.453 | 0.544 |
| 1.41776760258375e-11 | 8                  | PARP1    | Memory | 1 |       |       |
| 5.30877407616124e-15 | -0.310738744329369 |          |        |   | 0.118 | 0.196 |
| 9.46501330038788e-11 | 8                  | DNMT1    | Memory | 1 |       |       |
| 9.10574015123398e-15 | -0.321635600282292 |          |        |   | 0.312 | 0.412 |
| 1.62346241156351e-10 | 8                  | PPIB     | Memory | 1 |       |       |
| 9.42586443784406e-15 | -0.432670850142403 |          |        |   | 0.086 | 0.154 |
| 1.68053737062322e-10 | 8                  | DUSP2    | Memory | 1 |       |       |
| 1.14139262745708e-14 | -1.61023205157095  |          |        |   | 0.171 | 0.124 |
| 2.03498891549323e-10 | 8                  | IGHG2    | Memory | 1 |       |       |
| 6.40167792630274e-14 | -0.33458293375403  |          |        |   | 0.122 | 0.193 |
| 1.14135515748052e-09 | 8                  | DAAM1    | Memory | 1 |       |       |
| 3.86977741284781e-12 | -0.42579760980584  |          |        |   | 0.927 | 0.932 |
| 6.89942614936636e-08 | 8                  | HMGB1    | Memory | 1 |       |       |
| 5.19468800388742e-12 | -0.310288616177081 |          |        |   | 0.486 | 0.555 |
| 9.26160924213087e-08 | 8                  | TCEA1    | Memory | 1 |       |       |
| 6.36929829347173e-12 | -0.365794262635412 |          |        |   | 0.848 | 0.867 |
| 1.13558219274307e-07 | 8                  | CD79A    | Memory | 1 |       |       |
| 8.88326899672215e-12 | -0.304895035650034 |          |        |   | 0.095 | 0.154 |
| 1.58379802942559e-07 | 8                  | NFKBID   | Memory | 1 |       |       |
| 9.22862539965234e-12 | -0.375041509158289 |          |        |   | 0.995 | 0.99  |
| 1.64537162250402e-07 | 8                  | ACTB     | Memory | 1 |       |       |
| 1.53572491206872e-11 | -0.323792604973378 |          |        |   | 0.315 | 0.401 |
| 2.73804394572732e-07 | 8                  | BASP1    | Memory | 1 |       |       |
| 3.71006563363494e-11 | -0.428156689912998 |          |        |   | 0.479 | 0.536 |
| 6.61467601820774e-07 | 8                  | ISG20    | Memory | 1 |       |       |
| 2.80315959231703e-10 | -0.304660228718901 |          |        |   | 0.528 | 0.619 |
| 4.99775323714202e-06 | 8                  | MEF2C    | Memory | 1 |       |       |
| 4.58291231471741e-10 | -1.26381851291044  |          |        |   | 0.361 | 0.405 |
| 8.17087436590967e-06 | 8                  | JCHAIN   | Memory | 1 |       |       |
| 5.28961766607813e-10 | -0.329139607041094 |          |        |   | 0.554 | 0.607 |
| 9.4308593368507e-06  | 8                  | DYNLL1   | Memory | 1 |       |       |
| 1.55626605456793e-09 | -0.423882386856911 |          |        |   | 0.778 | 0.786 |
| 2.77466674868917e-05 | 8                  | ACTG1    | Memory | 1 |       |       |
| 1.63595667577775e-09 | -0.323621536040047 |          |        |   | 0.941 | 0.929 |
| 2.91674715724415e-05 | 8                  | NPM1     | Memory | 1 |       |       |
| 1.66905223214434e-09 | -0.30003511927883  |          |        |   | 0.176 | 0.243 |
| 2.97575322469014e-05 | 8                  | RGS1     | Memory | 1 |       |       |
| 1.27955352814916e-07 | -0.300752977330143 |          |        |   | 0.277 | 0.337 |

|                       |   |                   |                   |        |                    |       |        |     |
|-----------------------|---|-------------------|-------------------|--------|--------------------|-------|--------|-----|
| 0.00228131598533713   | 8 | DUT               | Memory            | 1      |                    |       |        |     |
| 1.73678123178851e-07  |   |                   |                   |        | -0.69278847163109  | 0.148 | 0.214  |     |
| 0.00309650725815574   | 8 | PLCG2             | Memory            | 1      |                    |       |        |     |
| 1.133179590316e-06    |   |                   |                   |        | -0.38075319894035  | 0.446 | 0.501  |     |
| 0.020203458915744     | 8 | SSR4              | Memory            | 1      |                    |       |        |     |
| 1.44268372773046e-06  |   |                   |                   |        | -1.75921472194198  | 0.56  | 0.648  |     |
| 0.0257216081817064    | 8 | IGLC2             | Memory            | 1      |                    |       |        |     |
| 8.58497564415188e-05  |   |                   |                   |        | -0.356679306897098 | 0.275 | 0.314  | 1   |
|                       | 8 | HSP90B1           | Memory            | 1      |                    |       |        |     |
| 0.000172038520472277  |   |                   |                   |        | -1.10154155830781  | 0.381 | 0.431  | 1   |
|                       | 8 | IGLC3             | Memory            | 1      |                    |       |        |     |
| 0.000447151849428913  |   |                   |                   |        | -1.0986302809319   | 0.914 | 0.927  | 1   |
|                       |   | IGKC              | Memory            | 1      |                    |       |        | 8   |
| 0.00440557608805478   |   |                   |                   |        | -1.38915438923069  | 0.268 | 0.242  | 1   |
|                       | 8 | IGHG4             | Memory            | 1      |                    |       |        |     |
| 0                     |   | 3.08267290432663  | 0.824             | 0.185  | 0                  | 9     | LGALS1 |     |
| Memory LGALS1         |   |                   |                   |        |                    |       |        |     |
| 0                     |   | 2.14313246384017  | 0.714             | 0.248  | 0                  | 9     | S100A4 |     |
| Memory LGALS1         |   |                   |                   |        |                    |       |        |     |
| 0                     |   | 1.51652260669439  | 0.854             | 0.452  | 0                  | 9     | S100A6 |     |
| Memory LGALS1         |   |                   |                   |        |                    |       |        |     |
| 0                     |   | 0.615459714060329 |                   | 1      | 0.998              | 0     | 9      | B2M |
|                       |   | Memory LGALS1     |                   |        |                    |       |        |     |
| 6.52166652510445e-322 |   |                   | 1.3039649815301   | 0.792  | 0.425              |       |        |     |
| 1.16274792476087e-317 | 9 | COTL1             | Memory            | LGALS1 |                    |       |        |     |
| 2.98288116981579e-298 |   |                   | 1.22507136717837  | 0.889  | 0.559              |       |        |     |
| 5.31817883766458e-294 | 9 | VIM               | Memory            | LGALS1 |                    |       |        |     |
| 3.93215802945247e-260 |   |                   | -1.58394266496617 | 0.237  | 0.669              |       |        |     |
| 7.01064455071082e-256 | 9 | TCL1A             | Memory            | LGALS1 |                    |       |        |     |
| 8.81605088906097e-255 |   |                   | 1.19086698531522  | 0.635  | 0.235              |       |        |     |
| 1.57181371301068e-250 | 9 | TNFRSF13B         | Memory            | LGALS1 |                    |       |        |     |
| 4.80203388400387e-241 |   |                   | 1.16545405970551  | 0.606  | 0.225              |       |        |     |
| 8.5615462117905e-237  | 9 | CAPG              | Memory            | LGALS1 |                    |       |        |     |
| 7.3476314677521e-224  |   |                   | 0.595867707348495 | 1      | 0.998              |       |        |     |
| 1.31000921438552e-219 | 9 | TMSB4X            | Memory            | LGALS1 |                    |       |        |     |
| 6.57154593127733e-204 |   |                   | 1.06386786975665  | 0.652  | 0.292              |       |        |     |
| 1.17164092408743e-199 | 9 | CD27              | Memory            | LGALS1 |                    |       |        |     |
| 9.64667547453537e-202 |   |                   | 0.851794158832797 | 0.943  | 0.769              |       |        |     |
| 1.71990577035491e-197 | 9 | HLA-DPB1          | Memory            | LGALS1 |                    |       |        |     |
| 2.04518536689899e-196 |   |                   | 1.20745647836339  | 0.526  | 0.186              |       |        |     |
| 3.6463609906442e-192  | 9 | ACP5              | Memory            | LGALS1 |                    |       |        |     |
| 4.08596632469301e-195 |   |                   | 0.984229832699323 | 0.75   | 0.434              |       |        |     |
| 7.28486936029517e-191 | 9 | ANXA2             | Memory            | LGALS1 |                    |       |        |     |
| 1.1740463499015e-193  |   |                   | 0.745982086836826 | 0.961  | 0.851              |       |        |     |
| 2.09320723723938e-189 | 9 | SH3BGL3           | Memory            | LGALS1 |                    |       |        |     |
| 3.58808177685326e-191 |   |                   | 0.792724747918777 | 0.185  | 0.014              |       |        |     |
| 6.39719099995167e-187 | 9 | FUT7              | Memory            | LGALS1 |                    |       |        |     |
| 1.46440746272636e-178 |   |                   | -1.13854535862614 | 0.696  | 0.913              |       |        |     |
| 2.61089206529483e-174 | 9 | IGHM              | Memory            | LGALS1 |                    |       |        |     |
| 2.57114454486985e-173 |   |                   | 0.997948504110509 | 0.619  | 0.326              |       |        |     |

|                       |                   |          |        |        |       |
|-----------------------|-------------------|----------|--------|--------|-------|
| 4.58409360904845e-169 | 9                 | S100A11  | Memory | LGALS1 |       |
| 2.33549775557581e-167 | 0.924391316959341 |          |        | 0.364  | 0.111 |
| 4.16395894841611e-163 | 9                 | PYCARD   | Memory | LGALS1 |       |
| 9.97817686075744e-166 | 0.436271530119104 |          |        | 0.999  | 0.986 |
| 1.77900915250444e-161 | 9                 | HLA-B    | Memory | LGALS1 |       |
| 5.26172946286185e-163 | 0.861009277562669 |          |        | 0.2    | 0.036 |
| 9.3811374593364e-159  | 9                 | GSN      | Memory | LGALS1 |       |
| 5.76277285670665e-161 | 0.853259062612589 |          |        | 0.328  | 0.083 |
| 1.02744477262223e-156 | 9                 | ITGB7    | Memory | LGALS1 |       |
| 3.78513673337491e-159 | 0.705405154439422 |          |        | 0.966  | 0.865 |
| 6.74852028193412e-155 | 9                 | CD52     | Memory | LGALS1 |       |
| 4.92528262846606e-158 | 0.754032310890853 |          |        | 0.92   | 0.69  |
| 8.78128639829213e-154 | 9                 | EMP3     | Memory | LGALS1 |       |
| 3.89366301838426e-157 | 0.921600921297879 |          |        | 0.748  | 0.507 |
| 6.94201179547729e-153 | 9                 | LSP1     | Memory | LGALS1 |       |
| 2.05629296194988e-147 | 0.78519113307303  | 0.312    |        | 0.064  |       |
| 3.66616472186045e-143 | 9                 | MYO1F    | Memory | LGALS1 |       |
| 2.7504538044002e-142  | 0.661577956939326 |          |        | 0.168  | 0.022 |
| 4.90378408786511e-138 | 9                 | ZBED2    | Memory | LGALS1 |       |
| 2.39623429426976e-137 | 0.70574199032431  | 0.265    |        | 0.062  |       |
| 4.27224612325356e-133 | 9                 | THEMIS2  | Memory | LGALS1 |       |
| 2.81287047048894e-136 | 0.802955290865642 |          |        | 0.706  | 0.417 |
| 5.01506676183474e-132 | 9                 | PLP2     | Memory | LGALS1 |       |
| 1.89937027726663e-134 | -1.04973707834447 |          |        | 0.299  | 0.616 |
| 3.38638726733867e-130 | 9                 | IGHD     | Memory | LGALS1 |       |
| 2.29669181994311e-134 | 0.649380124587767 |          |        | 0.186  | 0.023 |
| 4.09477184577658e-130 | 9                 | ZBTB32   | Memory | LGALS1 |       |
| 4.91972780795802e-129 | 0.482760661621196 |          |        | 0.976  | 0.902 |
| 8.77138270880835e-125 | 9                 | HLA-A    | Memory | LGALS1 |       |
| 6.97059872457781e-126 | 1.12824055330417  | 0.296    |        | 0.088  |       |
| 1.24278804660498e-121 | 9                 | KLK1     | Memory | LGALS1 |       |
| 4.42628665771537e-120 | 0.798655548482811 |          |        | 0.565  | 0.258 |
| 7.89162648204073e-116 | 9                 | GPR183   | Memory | LGALS1 |       |
| 8.85305241713671e-120 | 0.759837643744319 |          |        | 0.271  | 0.069 |
| 1.5784107154513e-115  | 9                 | CAPN2    | Memory | LGALS1 |       |
| 4.37542006187038e-113 | 0.825201721038615 |          |        | 0.53   | 0.297 |
| 7.8009364283087e-109  | 9                 | CD99     | Memory | LGALS1 |       |
| 2.96554119681176e-108 | 0.59268995135435  | 0.935    |        | 0.81   |       |
| 5.2872633997957e-104  | 9                 | HLA-DPA1 | Memory | LGALS1 |       |
| 5.4345103256139e-106  | 0.732339448617684 |          |        | 0.35   | 0.144 |
| 9.68918845953702e-102 | 9                 | CLECL1   | Memory | LGALS1 |       |
| 1.66019811578706e-104 | 0.512716089101223 |          |        | 0.98   | 0.945 |
| 2.95996722063675e-100 | 9                 | HLA-DRA  | Memory | LGALS1 |       |
| 5.49478105847941e-103 | 0.787451635161478 |          |        | 0.326  | 0.134 |
| 9.79664514916293e-99  | 9                 | ITGB1    | Memory | LGALS1 |       |
| 1.26305041421976e-101 | 0.718602805773942 |          |        | 0.292  | 0.105 |
| 2.2518925835124e-97   | 9                 | CRIP1    | Memory | LGALS1 |       |
| 9.36997986270008e-98  | 0.558315523146643 |          |        | 0.899  | 0.759 |
| 1.6705737097208e-93   | 9                 | MYL12A   | Memory | LGALS1 |       |
| 1.04036011784399e-97  | 0.48513444658187  | 0.144    |        | 0.019  |       |

|                      |                    |          |        |        |       |       |
|----------------------|--------------------|----------|--------|--------|-------|-------|
| 1.85485805410405e-93 | 9                  | CALHM2   | Memory | LGALS1 |       |       |
| 4.7640054548681e-97  | 0.697369207612806  |          |        |        | 0.574 | 0.341 |
| 8.49374532548434e-93 | 9                  | S100A10  | Memory | LGALS1 |       |       |
| 3.16531924685605e-96 | 0.508231375481194  |          |        |        | 0.924 | 0.789 |
| 5.64344768521964e-92 | 9                  | HLA-E    | Memory | LGALS1 |       |       |
| 1.05736426477589e-91 | -1.08336091658378  |          |        |        | 0.246 | 0.479 |
| 1.88517474766894e-87 | 9                  | CD83     | Memory | LGALS1 |       |       |
| 1.31673207336739e-87 | 0.637230506490436  |          |        |        | 0.272 | 0.085 |
| 2.34760161360673e-83 | 9                  | AHNAK    | Memory | LGALS1 |       |       |
| 2.11976620463131e-85 | -1.01490290324374  |          |        |        | 0.383 | 0.595 |
| 3.77933116623715e-81 | 9                  | MARCKSL1 | Memory | LGALS1 |       |       |
| 7.14361979987338e-85 | 0.82340016098362   | 0.358    |        |        | 0.152 |       |
| 1.27363597411943e-80 | 9                  | LMNA     | Memory | LGALS1 |       |       |
| 2.17705769778567e-83 | 0.451843881899884  |          |        |        | 0.976 | 0.885 |
| 3.88147616938207e-79 | 9                  | GAPDH    | Memory | LGALS1 |       |       |
| 1.03260450270892e-81 | 0.651560914647453  |          |        |        | 0.319 | 0.135 |
| 1.84103056787973e-77 | 9                  | MYO1G    | Memory | LGALS1 |       |       |
| 8.37299590354652e-81 | 0.623923036201349  |          |        |        | 0.592 | 0.382 |
| 1.49282143964331e-76 | 9                  | ARL6IP5  | Memory | LGALS1 |       |       |
| 1.80000383258336e-76 | 0.628373360373611  |          |        |        | 0.312 | 0.134 |
| 3.20922683311288e-72 | 9                  | AIM2     | Memory | LGALS1 |       |       |
| 5.23158351196363e-75 | 0.536620542923546  |          |        |        | 0.516 | 0.266 |
| 9.32739024347995e-71 | 9                  | KLF2     | Memory | LGALS1 |       |       |
| 4.70651863841967e-74 | 0.601162695495606  |          |        |        | 0.489 | 0.278 |
| 8.39125208043843e-70 | 9                  | ACAP1    | Memory | LGALS1 |       |       |
| 1.53118342789752e-73 | 0.590555321755028  |          |        |        | 0.488 | 0.272 |
| 2.72994693359848e-69 | 9                  | RNASET2  | Memory | LGALS1 |       |       |
| 2.23632755399125e-73 | 0.388254034669009  |          |        |        | 0.123 | 0.019 |
| 3.98714839601101e-69 | 9                  | HMOX1    | Memory | LGALS1 |       |       |
| 1.59483011463102e-72 | 0.632561333241827  |          |        |        | 0.373 | 0.184 |
| 2.84342261137565e-68 | 9                  | S1PR4    | Memory | LGALS1 |       |       |
| 8.0512207290659e-72  | 0.657613159386537  |          |        |        | 0.587 | 0.413 |
| 1.43545214378516e-67 | 9                  | CTSH     | Memory | LGALS1 |       |       |
| 2.18823063154054e-71 | -1.22818147465486  |          |        |        | 0.057 | 0.211 |
| 3.90139639297363e-67 | 9                  | RGS13    | Memory | LGALS1 |       |       |
| 1.15941635697328e-70 | 0.493569056937825  |          |        |        | 0.849 | 0.708 |
| 2.06712342284767e-66 | 9                  | CLIC1    | Memory | LGALS1 |       |       |
| 2.64053989445947e-70 | -0.764365442880025 |          |        |        | 0.154 | 0.353 |
| 4.7078185778318e-66  | 9                  | ABRACL   | Memory | LGALS1 |       |       |
| 1.52025792119673e-68 | 0.536004746708856  |          |        |        | 0.252 | 0.086 |
| 2.71046784770165e-64 | 9                  | ANXA4    | Memory | LGALS1 |       |       |
| 9.91245971835916e-68 | -0.628329307112828 |          |        |        | 0.436 | 0.639 |
| 1.76729244318625e-63 | 9                  | GSTP1    | Memory | LGALS1 |       |       |
| 1.95419595011324e-66 | 0.481030982735397  |          |        |        | 0.193 | 0.056 |
| 3.48413595945689e-62 | 9                  | FLNA     | Memory | LGALS1 |       |       |
| 1.31987491091577e-63 | -0.71657927450554  |          |        |        | 0.053 | 0.207 |
| 2.35320497867173e-59 | 9                  | HMCES    | Memory | LGALS1 |       |       |
| 1.61797301064378e-62 | 0.56208335200625   | 0.483    |        |        | 0.291 |       |
| 2.88468408067679e-58 | 9                  | PDLIM1   | Memory | LGALS1 |       |       |
| 3.51114549960893e-62 | 0.594387409632637  |          |        |        | 0.45  | 0.261 |



|                      |                    |          |        |        |       |
|----------------------|--------------------|----------|--------|--------|-------|
| 6.26002131125275e-58 | 9                  | HHEX     | Memory | LGALS1 |       |
| 4.40732836042503e-62 | 0.47106834596701   |          | 0.873  | 0.748  |       |
| 7.85782573380179e-58 | 9                  | HLA-C    | Memory | LGALS1 |       |
| 5.91988568987545e-60 | 0.524598421032727  |          |        | 0.648  | 0.466 |
| 1.05545641964789e-55 | 9                  | GPSM3    | Memory | LGALS1 |       |
| 1.1299101612451e-59  | -0.665399897897797 |          |        | 0.433  | 0.625 |
| 2.0145168264839e-55  | 9                  | CLEC2D   | Memory | LGALS1 |       |
| 2.76831909082804e-59 | 0.362507613885372  |          |        | 0.92   | 0.81  |
| 4.93563610703731e-55 | 9                  | COR01A   | Memory | LGALS1 |       |
| 5.29971109103235e-59 | -1.22048657202261  |          |        | 0.142  | 0.292 |
| 9.44885490420157e-55 | 9                  | MIR155HG | Memory | LGALS1 |       |
| 6.27519262459673e-59 | 0.575596951654443  |          |        | 0.551  | 0.344 |
| 1.11880409303935e-54 | 9                  | LY6E     | Memory | LGALS1 |       |
| 2.976482242664e-58   | 0.322952142266454  |          |        | 0.995  | 0.985 |
| 5.30677019044565e-54 | 9                  | TMSB10   | Memory | LGALS1 |       |
| 3.01577659659924e-58 | -0.802006679312371 |          |        | 0.142  | 0.304 |
| 5.37682809407679e-54 | 9                  | NME1     | Memory | LGALS1 |       |
| 6.49730683107848e-57 | -0.500549383353373 |          |        | 0.011  | 0.122 |
| 1.15840483491298e-52 | 9                  | CD38     | Memory | LGALS1 |       |
| 8.78430818069011e-57 | 0.426683923167266  |          |        | 0.708  | 0.505 |
| 1.56615430553524e-52 | 9                  | BANK1    | Memory | LGALS1 |       |
| 2.87926139637146e-54 | 0.384288700909757  |          |        | 0.885  | 0.773 |
| 5.13343514359068e-50 | 9                  | ARHGDIB  | Memory | LGALS1 |       |
| 4.85085412217936e-53 | 0.524110154095166  |          |        | 0.493  | 0.33  |
| 8.64858781443358e-49 | 9                  | VOPP1    | Memory | LGALS1 |       |
| 5.50713589035184e-52 | 0.437327279065709  |          |        | 0.167  | 0.06  |
| 9.8186725789083e-48  | 9                  | ARID3A   | Memory | LGALS1 |       |
| 1.76947335481221e-51 | 0.479378190132472  |          |        | 0.271  | 0.112 |
| 3.15479404429469e-47 | 9                  | FCGR2B   | Memory | LGALS1 |       |
| 3.54140886754438e-51 | 0.410193233225447  |          |        | 0.168  | 0.051 |
| 6.31397786994488e-47 | 9                  | TNFRSF1B | Memory | LGALS1 |       |
| 4.24434929903206e-51 | 0.528457899125341  |          |        | 0.372  | 0.214 |
| 7.56725036524427e-47 | 9                  | CCDC50   | Memory | LGALS1 |       |
| 1.50172599811603e-50 | -0.342102024684808 |          |        | 0.006  | 0.106 |
| 2.67742728204108e-46 | 9                  | SEMA4A   | Memory | LGALS1 |       |
| 1.76729942778442e-50 | 0.487888589805416  |          |        | 0.462  | 0.272 |
| 3.15091814979684e-46 | 9                  | IFITM2   | Memory | LGALS1 |       |
| 3.83249231432514e-50 | 0.488794206458678  |          |        | 0.528  | 0.356 |
| 6.8329505472103e-46  | 9                  | ANXA6    | Memory | LGALS1 |       |
| 9.41997995972531e-50 | 0.333252175902608  |          |        | 0.993  | 0.962 |
| 1.67948822701943e-45 | 9                  | FTL      | Memory | LGALS1 |       |
| 4.01867574393352e-49 | 0.442163085818369  |          |        | 0.796  | 0.673 |
| 7.16489698385907e-45 | 9                  | TAGLN2   | Memory | LGALS1 |       |
| 8.5176151177333e-49  | 0.378305044796062  |          |        | 0.138  | 0.034 |
| 1.51860559934067e-44 | 9                  | RAB31    | Memory | LGALS1 |       |
| 1.02040535729235e-47 | -0.507969868329166 |          |        | 0.653  | 0.775 |
| 1.81928071151654e-43 | 9                  | SEC62    | Memory | LGALS1 |       |
| 1.05126768711735e-47 | 0.470066000352135  |          |        | 0.265  | 0.136 |
| 1.87430515936153e-43 | 9                  | COR01B   | Memory | LGALS1 |       |
| 1.05270578151856e-47 | 0.394722255965053  |          |        | 0.823  | 0.693 |

|                       |                    |                 |        |       |
|-----------------------|--------------------|-----------------|--------|-------|
| 1.87686913786944e-43  | 9                  | HLA-DQB1 Memory | LGALS1 |       |
| 2.27148161449064e-47  | 0.490722738954979  |                 | 0.748  | 0.616 |
| 4.04982457047537e-43  | 9                  | SUB1 Memory     | LGALS1 |       |
| 4.03990316968836e-47  | 0.489286583111088  |                 | 0.298  | 0.158 |
| 7.20274336123737e-43  | 9                  | KIAA1551 Memory | LGALS1 |       |
| 3.45690090352369e-46  | 0.523663761574152  |                 | 0.423  | 0.28  |
| 6.16330862089239e-42  | 9                  | CD82 Memory     | LGALS1 |       |
| 1.03263390785676e-44  | 0.488348701606117  |                 | 0.617  | 0.487 |
| 1.84108299431781e-40  | 9                  | RAC2 Memory     | LGALS1 |       |
| 1.51575373001683e-44  | 0.472252267480691  |                 | 0.246  | 0.11  |
| 2.70243732524701e-40  | 9                  | CLN8 Memory     | LGALS1 |       |
| 1.98401659322864e-44  | 0.591894500703883  |                 | 0.256  | 0.121 |
| 3.53730318406735e-40  | 9                  | LGALS3 Memory   | LGALS1 |       |
| 3.84748512245979e-44  | -0.395800170278834 |                 | 0.02   | 0.118 |
| 6.85968122483357e-40  | 9                  | PYCR1 Memory    | LGALS1 |       |
| 9.46343693237503e-44  | 0.470946236334067  |                 | 0.364  | 0.214 |
| 1.68723617067314e-39  | 9                  | LY86 Memory     | LGALS1 |       |
| 3.4292592467773e-43   | 0.497497022836317  |                 | 0.291  | 0.164 |
| 6.11402631107925e-39  | 9                  | SAMSN1 Memory   | LGALS1 |       |
| 4.74625807252769e-43  | -0.595980756429612 |                 | 0.081  | 0.202 |
| 8.46210351750963e-39  | 9                  | YBX3 Memory     | LGALS1 |       |
| 1.33560693263131e-42  | -0.531099680743462 |                 | 0.141  | 0.294 |
| 2.38125360018836e-38  | 9                  | RRAS2 Memory    | LGALS1 |       |
| 1.61372714885784e-42  | 0.326128472407969  |                 | 0.117  | 0.039 |
| 2.87711413369864e-38  | 9                  | BHLHE41 Memory  | LGALS1 |       |
| 2.29696215512445e-42  | 0.44784119466411   | 0.401           | 0.249  |       |
| 4.09525382637138e-38  | 9                  | TBC1D10C Memory | LGALS1 |       |
| 8.47756693358625e-42  | 0.442131940411941  |                 | 0.303  | 0.166 |
| 1.51146540858909e-37  | 9                  | MFSD10 Memory   | LGALS1 |       |
| 9.37192375289918e-42  | 0.438204539608515  |                 | 0.625  | 0.475 |
| 1.6709202859044e-37   | 9                  | ISCU Memory     | LGALS1 |       |
| 1.919671930444035e-41 | -0.318269935771023 |                 | 0.013  | 0.102 |
| 3.4225830847821e-37   | 9                  | FAM241A Memory  | LGALS1 |       |
| 8.47072369995237e-41  | 0.45102659758574   | 0.355           | 0.21   |       |
| 1.51024532846451e-36  | 9                  | YPEL3 Memory    | LGALS1 |       |
| 9.23798348382084e-41  | 0.44826332619197   | 0.383           | 0.237  |       |
| 1.64704007533042e-36  | 9                  | ARHGAP45 Memory | LGALS1 |       |
| 9.79829706150296e-41  | 0.524536717689935  |                 | 0.418  | 0.294 |
| 1.74693838309536e-36  | 9                  | TCF4 Memory     | LGALS1 |       |
| 1.13885776742731e-40  | 0.494425053500087  |                 | 0.622  | 0.48  |
| 2.03046951354615e-36  | 9                  | NEAT1 Memory    | LGALS1 |       |
| 1.94754416967537e-40  | 0.448708201955592  |                 | 0.364  | 0.223 |
| 3.47227650011422e-36  | 9                  | PCSK7 Memory    | LGALS1 |       |
| 2.14810626566283e-40  | 0.463117688374463  |                 | 0.369  | 0.235 |
| 3.82985866105027e-36  | 9                  | NCF4 Memory     | LGALS1 |       |
| 7.6686199901917e-40   | 0.505470076584166  |                 | 0.39   | 0.262 |
| 1.36723825805128e-35  | 9                  | GRN Memory      | LGALS1 |       |
| 8.82462765897007e-40  | 0.342209990045797  |                 | 0.136  | 0.043 |
| 1.57334286531777e-35  | 9                  | HCK Memory      | LGALS1 |       |
| 1.6391791780605e-39   | 0.391795256223759  |                 | 0.22   | 0.091 |

|                      |                    |          |        |        |       |
|----------------------|--------------------|----------|--------|--------|-------|
| 2.92249255656407e-35 | 9                  | CYSLTR1  | Memory | LGALS1 |       |
| 4.32209053214268e-39 | 0.361857890049002  |          |        | 0.77   | 0.649 |
| 7.70585520975719e-35 | 9                  | HLA-DQA1 | Memory | LGALS1 |       |
| 9.37664680291388e-39 | 0.380689701808671  |          |        | 0.133  | 0.046 |
| 1.67176235849152e-34 | 9                  | PLD4     | Memory | LGALS1 |       |
| 8.85798588254645e-38 | 0.450652706077778  |          |        | 0.236  | 0.125 |
| 1.57929030299921e-33 | 9                  | EEA1     | Memory | LGALS1 |       |
| 1.41787003973368e-37 | 0.42993853821346   | 0.271    |        | 0.156  |       |
| 2.52792049384118e-33 | 9                  | IL10RA   | Memory | LGALS1 |       |
| 3.84927599314558e-37 | 0.340729558548188  |          |        | 0.13   | 0.059 |
| 6.86287416817925e-33 | 9                  | TESC     | Memory | LGALS1 |       |
| 3.9427662403482e-37  | -0.579195310955869 |          |        | 0.111  | 0.237 |
| 7.0295579299168e-33  | 9                  | IL4R     | Memory | LGALS1 |       |
| 5.08192014111004e-37 | 0.403875530070131  |          |        | 0.217  | 0.103 |
| 9.06055541958508e-33 | 9                  | CARD19   | Memory | LGALS1 |       |
| 5.30446569818716e-37 | 0.368027426404037  |          |        | 0.171  | 0.079 |
| 9.45733189329789e-33 | 9                  | KCNN4    | Memory | LGALS1 |       |
| 7.08603150012946e-37 | 0.377486303608528  |          |        | 0.74   | 0.618 |
| 1.26336855615808e-32 | 9                  | ARPC1B   | Memory | LGALS1 |       |
| 1.00759860445026e-36 | -0.345632994811399 |          |        | 0.017  | 0.104 |
| 1.79644755187436e-32 | 9                  | MYBL2    | Memory | LGALS1 |       |
| 1.10883433860144e-36 | 0.309903669516163  |          |        | 0.116  | 0.033 |
| 1.9769407422925e-32  | 9                  | ARL4C    | Memory | LGALS1 |       |
| 1.12924655902407e-36 | 0.369526499784926  |          |        | 0.487  | 0.326 |
| 2.01333369008402e-32 | 9                  | RIPOR2   | Memory | LGALS1 |       |
| 1.4796189804424e-36  | 0.401049790207901  |          |        | 0.549  | 0.377 |
| 2.63801268023076e-32 | 9                  | CD44     | Memory | LGALS1 |       |
| 1.60126788075238e-36 | 0.3692297343041    | 0.887    |        | 0.782  |       |
| 2.85490050459343e-32 | 9                  | ACTG1    | Memory | LGALS1 |       |
| 3.96899139422119e-36 | 0.418324265518345  |          |        | 0.236  | 0.116 |
| 7.07631475675697e-32 | 9                  | IL27RA   | Memory | LGALS1 |       |
| 5.62726288572261e-36 | -0.910528376135899 |          |        | 0.641  | 0.718 |
| 1.00328469989548e-31 | 9                  | HMG2     | Memory | LGALS1 |       |
| 8.11587708147594e-36 | -0.513685924882975 |          |        | 0.269  | 0.427 |
| 1.44697972485635e-31 | 9                  | TMEM123  | Memory | LGALS1 |       |
| 2.27732570456301e-35 | 0.41680401802869   | 0.267    |        | 0.144  |       |
| 4.06024399866539e-31 | 9                  | MVP      | Memory | LGALS1 |       |
| 7.26516429461998e-35 | -0.892027582465439 |          |        | 0.08   | 0.185 |
| 1.2953061420878e-30  | 9                  | XBP1     | Memory | LGALS1 |       |
| 1.5806379640327e-34  | 0.485924007884557  |          |        | 0.209  | 0.117 |
| 2.8181194260739e-30  | 9                  | NCBP3    | Memory | LGALS1 |       |
| 1.80995243276413e-34 | 0.388086565489277  |          |        | 0.326  | 0.178 |
| 3.22696419237516e-30 | 9                  | MBP      | Memory | LGALS1 |       |
| 1.92058937539838e-34 | -0.492561281439321 |          |        | 0.042  | 0.138 |
| 3.42421879739777e-30 | 9                  | NEIL1    | Memory | LGALS1 |       |
| 4.04091963142085e-34 | 0.319583909663889  |          |        | 0.119  | 0.042 |
| 7.20455561086024e-30 | 9                  | VSIR     | Memory | LGALS1 |       |
| 8.70247348956281e-34 | -0.768949689460335 |          |        | 0.628  | 0.698 |
| 1.55156399845415e-29 | 9                  | H2AFZ    | Memory | LGALS1 |       |
| 1.39661979977592e-33 | 0.360141132531043  |          |        | 0.209  | 0.097 |

|                      |                    |            |        |        |       |
|----------------------|--------------------|------------|--------|--------|-------|
| 2.49003344102049e-29 | 9                  | CDKN2D     | Memory | LGALS1 |       |
| 1.79257197538444e-33 | -0.442676069920709 |            |        | 0.045  | 0.139 |
| 3.19597657491292e-29 | 9                  | PSAT1      | Memory | LGALS1 |       |
| 1.92750176640141e-33 | 0.357634308601119  |            |        | 0.174  | 0.08  |
| 3.43654289931707e-29 | 9                  | OAS1       | Memory | LGALS1 |       |
| 1.23174402670086e-32 | 0.360980617443685  |            |        | 0.453  | 0.298 |
| 2.19607642520496e-28 | 9                  | ZFP36L2    | Memory | LGALS1 |       |
| 1.72631550931825e-32 | 0.376310999175381  |            |        | 0.268  | 0.141 |
| 3.07784792156351e-28 | 9                  | SUN2       | Memory | LGALS1 |       |
| 4.28180315013225e-32 | -0.92919634468567  |            |        | 0.322  | 0.432 |
| 7.63402683637079e-28 | 9                  | STMN1      | Memory | LGALS1 |       |
| 2.16283680143056e-31 | 0.322228763072232  |            |        | 0.205  | 0.095 |
| 3.85612173327054e-27 | 9                  | ARRB2      | Memory | LGALS1 |       |
| 2.41046272457769e-31 | 0.313644346271513  |            |        | 0.647  | 0.498 |
| 4.29761399164956e-27 | 9                  | TSC22D3    | Memory | LGALS1 |       |
| 3.10757068761854e-31 | -0.500539205634174 |            |        | 0.262  | 0.389 |
| 5.5404877789551e-27  | 9                  | NHP2       | Memory | LGALS1 |       |
| 4.48192403117545e-31 | 0.367989042459826  |            |        | 0.423  | 0.292 |
| 7.9908223551827e-27  | 9                  | TWF2       | Memory | LGALS1 |       |
| 5.26124582931478e-31 | 0.362035721743964  |            |        | 0.583  | 0.441 |
| 9.38027518908532e-27 | 9                  | KLF6       | Memory | LGALS1 |       |
| 6.54121707810409e-31 | -0.42853517457768  |            |        | 0.106  | 0.228 |
| 1.16623359285518e-26 | 9                  | SIAH2      | Memory | LGALS1 |       |
| 6.58094062709124e-31 | -0.531091600170746 |            |        | 0.362  | 0.478 |
| 1.1733159044041e-26  | 9                  | SNRPD1     | Memory | LGALS1 |       |
| 1.13926505915365e-30 | 0.313038520568545  |            |        | 0.139  | 0.056 |
| 2.03119567396505e-26 | 9                  | TTC39C     | Memory | LGALS1 |       |
| 1.28667912182267e-30 | -0.475407748795854 |            |        | 0.038  | 0.125 |
| 2.29402020629764e-26 | 9                  | AL139020.1 | Memory | LGALS1 |       |
| 1.45842169483725e-30 | 0.392554853046299  |            |        | 0.46   | 0.323 |
| 2.60022003972534e-26 | 9                  | ZFP36      | Memory | LGALS1 |       |
| 1.71760773001354e-30 | 0.342639905192327  |            |        | 0.172  | 0.074 |
| 3.06232282184114e-26 | 9                  | TIMP1      | Memory | LGALS1 |       |
| 2.47942355207666e-30 | 0.373453789823328  |            |        | 0.33   | 0.207 |
| 4.42056425099747e-26 | 9                  | IDS        | Memory | LGALS1 |       |
| 2.68381281143769e-30 | -0.465148791436371 |            |        | 0.096  | 0.21  |
| 4.78496986151226e-26 | 9                  | EAF2       | Memory | LGALS1 |       |
| 2.72056171197793e-30 | 0.305946079071846  |            |        | 0.115  | 0.044 |
| 4.85048947628545e-26 | 9                  | HAGHL      | Memory | LGALS1 |       |
| 3.26030811310861e-30 | 0.454573461275795  |            |        | 0.332  | 0.207 |
| 5.81280333486134e-26 | 9                  | PLAC8      | Memory | LGALS1 |       |
| 3.58741621086728e-30 | -1.26658306725386  |            |        | 0.082  | 0.179 |
| 6.39600436235527e-26 | 9                  | MZB1       | Memory | LGALS1 |       |
| 5.10403971776682e-30 | 0.395788084273434  |            |        | 0.273  | 0.18  |
| 9.09999241280647e-26 | 9                  | TRABD      | Memory | LGALS1 |       |
| 7.04827273411335e-30 | 0.305829077184248  |            |        | 0.627  | 0.498 |
| 1.25663654576507e-25 | 9                  | PSMB9      | Memory | LGALS1 |       |
| 1.02985561463181e-29 | 0.410364020785835  |            |        | 0.521  | 0.42  |
| 1.83612957532706e-25 | 9                  | GABARAPL2  | Memory | LGALS1 |       |
| 1.52138014792895e-29 | 0.364722995750516  |            |        | 0.467  | 0.334 |

|                      |                    |            |        |        |       |
|----------------------|--------------------|------------|--------|--------|-------|
| 2.71246866574253e-25 | 9                  | SPIB       | Memory | LGALS1 |       |
| 2.25718351005781e-29 | -0.571060355957073 |            |        | 0.354  | 0.465 |
| 4.02433248008206e-25 | 9                  | HSPD1      | Memory | LGALS1 |       |
| 3.620573274054e-29   | 0.306199250079302  |            |        | 0.839  | 0.75  |
| 6.45512009031087e-25 | 9                  | TOMM7      | Memory | LGALS1 |       |
| 4.23872213391463e-29 | 0.378551279201843  |            |        | 0.331  | 0.207 |
| 7.55721769255639e-25 | 9                  | FMNL1      | Memory | LGALS1 |       |
| 4.25756958792188e-29 | 0.382883347776557  |            |        | 0.418  | 0.294 |
| 7.59082081830592e-25 | 9                  | BLK        | Memory | LGALS1 |       |
| 6.25314514199222e-29 | -0.469800743386552 |            |        | 0.029  | 0.112 |
| 1.11487324736579e-24 | 9                  | VPREB3     | Memory | LGALS1 |       |
| 7.19365515264937e-29 | -0.479847508346497 |            |        | 0.125  | 0.241 |
| 1.28255677716586e-24 | 9                  | GCHFR      | Memory | LGALS1 |       |
| 9.14987207756288e-29 | 0.346797869293897  |            |        | 0.389  | 0.254 |
| 1.63133069270869e-24 | 9                  | CNN2       | Memory | LGALS1 |       |
| 9.91637272706647e-29 | 0.312388247803148  |            |        | 0.528  | 0.384 |
| 1.76799009350868e-24 | 9                  | EVI2B      | Memory | LGALS1 |       |
| 1.83289863695059e-28 | -0.852111411821011 |            |        | 0.614  | 0.667 |
| 3.26787497981921e-24 | 9                  | TUBA1B     | Memory | LGALS1 |       |
| 2.1738833469126e-28  | 0.374600927193642  |            |        | 0.315  | 0.199 |
| 3.87581661921048e-24 | 9                  | PTPN1      | Memory | LGALS1 |       |
| 2.59046825484609e-28 | -0.63454706663961  |            |        | 0.724  | 0.749 |
| 4.6185458515651e-24  | 9                  | RAN        | Memory | LGALS1 |       |
| 2.60696288132619e-28 | 0.357388129977029  |            |        | 0.482  | 0.363 |
| 4.64795412111646e-24 | 9                  | CXXC5      | Memory | LGALS1 |       |
| 2.9082796764903e-28  | 0.367485726566202  |            |        | 0.319  | 0.204 |
| 5.18517183521455e-24 | 9                  | ARHGAP30   | Memory | LGALS1 |       |
| 3.16717421669294e-28 | -0.427232157233489 |            |        | 0.169  | 0.282 |
| 5.64675491094185e-24 | 9                  | WARS       | Memory | LGALS1 |       |
| 3.28653511589678e-28 | -0.648638748687999 |            |        | 0.733  | 0.769 |
| 5.85956345813237e-24 | 9                  | HMG1       | Memory | LGALS1 |       |
| 3.56522720113118e-28 | 0.380602131749975  |            |        | 0.47   | 0.341 |
| 6.35644357689677e-24 | 9                  | CAST       | Memory | LGALS1 |       |
| 8.1661554571501e-28  | 0.36178361344      |            |        | 0.494  | 0.373 |
| 1.45594385645529e-23 | 9                  | ZFAND6     | Memory | LGALS1 |       |
| 1.14928219375321e-27 | -0.446586132467493 |            |        | 0.271  | 0.393 |
| 2.04905522324261e-23 | 9                  | CCT5       | Memory | LGALS1 |       |
| 1.78053836481002e-27 | 0.3116685778469    |            |        | 0.164  | 0.08  |
| 3.17452185061979e-23 | 9                  | CDC42EP3   | Memory | LGALS1 |       |
| 1.89732250929751e-27 | -0.330085447139829 |            |        | 0.032  | 0.114 |
| 3.38273630182653e-23 | 9                  | AC023590.1 | Memory | LGALS1 |       |
| 2.18845903071773e-27 | -0.485842688700006 |            |        | 0.607  | 0.682 |
| 3.90180360586663e-23 | 9                  | SRSF3      | Memory | LGALS1 |       |
| 3.086046780824e-27   | 0.308146569875721  |            |        | 0.14   | 0.06  |
| 5.5021128055311e-23  | 9                  | KYNU       | Memory | LGALS1 |       |
| 6.18824504638545e-27 | 0.332037821882039  |            |        | 0.267  | 0.163 |
| 1.10330220932006e-22 | 9                  | ARHGAP25   | Memory | LGALS1 |       |
| 9.29868750159149e-27 | -0.469965486160953 |            |        | 0.559  | 0.643 |
| 1.65786299465875e-22 | 9                  | ERH        | Memory | LGALS1 |       |
| 9.50959563850517e-27 | 0.386691472625399  |            |        | 0.35   | 0.233 |

|                      |                    |            |        |        |       |
|----------------------|--------------------|------------|--------|--------|-------|
| 1.69546580638909e-22 | 9                  | AC004687.1 | Memory | LGALS1 |       |
| 1.65502794217114e-26 | 0.307197393328148  |            |        | 0.619  | 0.494 |
| 2.95074931809693e-22 | 9                  | SAT1       | Memory | LGALS1 |       |
| 2.69655532213417e-26 | 0.352939747654453  |            |        | 0.336  | 0.207 |
| 4.807688483833e-22   | 9                  | LBH        | Memory | LGALS1 |       |
| 2.83006755550226e-26 | -0.669778605375007 |            |        | 0.839  | 0.848 |
| 5.04572744470497e-22 | 9                  | HSP90AB1   | Memory | LGALS1 |       |
| 2.9725651030572e-26  | 0.327947331055871  |            |        | 0.702  | 0.591 |
| 5.29978632224069e-22 | 9                  | TPM3       | Memory | LGALS1 |       |
| 3.73906729791865e-26 | 0.315574713914511  |            |        | 0.302  | 0.17  |
| 6.66638308545917e-22 | 9                  | MARCH1     | Memory | LGALS1 |       |
| 4.24099637416905e-26 | -0.50146800945489  |            |        | 0.181  | 0.283 |
| 7.561272435506e-22   | 9                  | SRM        | Memory | LGALS1 |       |
| 4.24857949836227e-26 | 0.349263187506287  |            |        | 0.494  | 0.355 |
| 7.57479238763009e-22 | 9                  | ARID5B     | Memory | LGALS1 |       |
| 4.98188805811879e-26 | 0.32445672900685   |            | 0.229  | 0.119  |       |
| 8.88220821882e-22    | 9                  | DDAH2      | Memory | LGALS1 |       |
| 6.22348136830206e-26 | -0.459931660169141 |            |        | 0.352  | 0.467 |
| 1.10958449315457e-21 | 9                  | PRMT1      | Memory | LGALS1 |       |
| 1.275058060522e-25   | 0.375905982835332  |            |        | 0.424  | 0.32  |
| 2.27330101610468e-21 | 9                  | AES        | Memory | LGALS1 |       |
| 1.45765321653063e-25 | -0.553753403490226 |            |        | 0.398  | 0.488 |
| 2.59884991975247e-21 | 9                  | RANBP1     | Memory | LGALS1 |       |
| 1.91440535572962e-25 | -0.303272709887539 |            |        | 0.061  | 0.158 |
| 3.41319330873035e-21 | 9                  | PAICS      | Memory | LGALS1 |       |
| 2.12952989537054e-25 | 0.346015750692506  |            |        | 0.222  | 0.123 |
| 3.79673885045614e-21 | 9                  | ZEB2       | Memory | LGALS1 |       |
| 2.31107903110791e-25 | -0.48408855157637  |            |        | 0.487  | 0.574 |
| 4.12042280456229e-21 | 9                  | SNRPE      | Memory | LGALS1 |       |
| 3.34022906158917e-25 | 0.348865512005849  |            |        | 0.194  | 0.108 |
| 5.95529439390733e-21 | 9                  | IVNS1ABP   | Memory | LGALS1 |       |
| 5.69777353226584e-25 | -0.368851968949376 |            |        | 0.14   | 0.254 |
| 1.01585604306768e-20 | 9                  | GARS       | Memory | LGALS1 |       |
| 5.70307677873432e-25 | 0.32564774583444   |            | 0.496  | 0.348  |       |
| 1.01680155888054e-20 | 9                  | TXNIP      | Memory | LGALS1 |       |
| 5.79741599195051e-25 | -0.462785853163477 |            |        | 0.285  | 0.405 |
| 1.03362129720486e-20 | 9                  | RPL22L1    | Memory | LGALS1 |       |
| 6.23103797918424e-25 | -0.666341097195996 |            |        | 0.105  | 0.193 |
| 1.11093176130876e-20 | 9                  | PTTG1      | Memory | LGALS1 |       |
| 6.88879387412813e-25 | 0.31772282043374   |            | 0.208  | 0.115  |       |
| 1.2282030598183e-20  | 9                  | HPCAL1     | Memory | LGALS1 |       |
| 1.35615730199861e-24 | 0.311629377405821  |            |        | 0.192  | 0.087 |
| 2.41789285373332e-20 | 9                  | CCR6       | Memory | LGALS1 |       |
| 2.14009871240664e-24 | -0.463887111937639 |            |        | 0.154  | 0.273 |
| 3.81558199434981e-20 | 9                  | PIM1       | Memory | LGALS1 |       |
| 2.25331755358811e-24 | 0.340445653552508  |            |        | 0.453  | 0.339 |
| 4.01743986629224e-20 | 9                  | CMTM6      | Memory | LGALS1 |       |
| 2.26163087417918e-24 | -0.377759652642671 |            |        | 0.07   | 0.162 |
| 4.03226168557406e-20 | 9                  | APLP2      | Memory | LGALS1 |       |
| 3.89296971926612e-24 | 0.30937388125106   |            | 0.252  | 0.155  |       |

|                      |                    |          |        |        |       |       |
|----------------------|--------------------|----------|--------|--------|-------|-------|
| 6.94077571247957e-20 | 9                  | CTSZ     | Memory | LGALS1 |       |       |
| 4.01790667720571e-24 | 0.384473323072927  |          |        |        | 0.441 | 0.341 |
| 7.16352581479006e-20 | 9                  | RNH1     | Memory | LGALS1 |       |       |
| 4.11990395726743e-24 | -0.348806226359346 |          |        |        | 0.081 | 0.184 |
| 7.3453767654121e-20  | 9                  | LCK      | Memory | LGALS1 |       |       |
| 5.01660578953703e-24 | 0.319486013416971  |          |        |        | 0.241 | 0.144 |
| 8.94410646216557e-20 | 9                  | SELENOW  | Memory | LGALS1 |       |       |
| 5.17025932509585e-24 | -0.34802544860947  |          |        |        | 0.101 | 0.202 |
| 9.21805535071339e-20 | 9                  | EBNA1BP2 | Memory | LGALS1 |       |       |
| 7.04444000740644e-24 | -0.421173461515079 |          |        |        | 0.277 | 0.392 |
| 1.25595320892049e-19 | 9                  | SHMT2    | Memory | LGALS1 |       |       |
| 8.57818844144211e-24 | -0.324687003638665 |          |        |        | 0.07  | 0.159 |
| 1.52940521722471e-19 | 9                  | GAR1     | Memory | LGALS1 |       |       |
| 8.68253286719401e-24 | -0.555545644986573 |          |        |        | 0.48  | 0.562 |
| 1.54800878489202e-19 | 9                  | NCL      | Memory | LGALS1 |       |       |
| 1.10980423193544e-23 | 0.32248772020267   |          |        | 0.503  | 0.383 |       |
| 1.9786699651177e-19  | 9                  | PSAP     | Memory | LGALS1 |       |       |
| 1.44305516908205e-23 | -0.502741357015911 |          |        |        | 0.428 | 0.515 |
| 2.57282306095638e-19 | 9                  | PA2G4    | Memory | LGALS1 |       |       |
| 1.52088358087431e-23 | 0.334229518563995  |          |        |        | 0.327 | 0.206 |
| 2.71158333634081e-19 | 9                  | MGST3    | Memory | LGALS1 |       |       |
| 1.66428850651906e-23 | -0.355860918420472 |          |        |        | 0.148 | 0.256 |
| 2.96725997827284e-19 | 9                  | RRP7A    | Memory | LGALS1 |       |       |
| 1.96603388327437e-23 | 0.339680656968265  |          |        |        | 0.46  | 0.344 |
| 3.50524181048987e-19 | 9                  | LITAF    | Memory | LGALS1 |       |       |
| 2.41745032917008e-23 | -0.41985826957663  |          |        |        | 0.348 | 0.453 |
| 4.31007219187734e-19 | 9                  | ILF2     | Memory | LGALS1 |       |       |
| 2.60117229790945e-23 | -0.316045656280263 |          |        |        | 0.079 | 0.175 |
| 4.63763008994276e-19 | 9                  | ASNS     | Memory | LGALS1 |       |       |
| 3.30393715917961e-23 | -0.361263566214818 |          |        |        | 0.107 | 0.211 |
| 5.89058956110133e-19 | 9                  | GNL3     | Memory | LGALS1 |       |       |
| 3.36513622919667e-23 | 0.324337146331893  |          |        |        | 0.189 | 0.102 |
| 5.99970138303475e-19 | 9                  | SCIMP    | Memory | LGALS1 |       |       |
| 3.81882939914853e-23 | 0.333512853599459  |          |        |        | 0.281 | 0.176 |
| 6.80859093574191e-19 | 9                  | RHOF     | Memory | LGALS1 |       |       |
| 6.26874699291917e-23 | -0.513682490498032 |          |        |        | 0.147 | 0.238 |
| 1.11765490136756e-18 | 9                  | UBE2J1   | Memory | LGALS1 |       |       |
| 7.06372868678777e-23 | 0.332926241944225  |          |        |        | 0.403 | 0.287 |
| 1.25939218756739e-18 | 9                  | YWHAH    | Memory | LGALS1 |       |       |
| 7.49305186120406e-23 | -0.436867925886645 |          |        |        | 0.094 | 0.174 |
| 1.33593621633407e-18 | 9                  | TNFRSF18 | Memory | LGALS1 |       |       |
| 7.6052564377872e-23  | -0.328758334293674 |          |        |        | 0.09  | 0.182 |
| 1.35594117029308e-18 | 9                  | ABCE1    | Memory | LGALS1 |       |       |
| 7.92874391727393e-23 | 0.305912461958347  |          |        |        | 0.272 | 0.174 |
| 1.41361575301077e-18 | 9                  | RGS19    | Memory | LGALS1 |       |       |
| 8.11893762605314e-23 | -0.427512455398453 |          |        |        | 0.325 | 0.432 |
| 1.44752538934901e-18 | 9                  | CCT2     | Memory | LGALS1 |       |       |
| 9.72449941852988e-23 | -0.346622512001278 |          |        |        | 0.138 | 0.246 |
| 1.73378100132969e-18 | 9                  | POLD2    | Memory | LGALS1 |       |       |
| 1.01369730374917e-22 | -0.442115386904134 |          |        |        | 0.092 | 0.178 |

|                      |                    |         |        |        |       |
|----------------------|--------------------|---------|--------|--------|-------|
| 1.8073209228544e-18  | 9                  | PDIA4   | Memory | LGALS1 |       |
| 1.10942661287915e-22 | -0.335658782876359 |         |        | 0.051  | 0.134 |
| 1.97799670810224e-18 | 9                  | PHGDH   | Memory | LGALS1 |       |
| 1.15908120039961e-22 | 0.328985379974833  |         |        | 0.265  | 0.176 |
| 2.06652587219247e-18 | 9                  | ICAM3   | Memory | LGALS1 |       |
| 1.52235358629592e-22 | 0.467657981627092  |         |        | 0.605  | 0.485 |
| 2.714204209007e-18   | 9                  | LTB     | Memory | LGALS1 |       |
| 1.66444689107856e-22 | -0.376322299170414 |         |        | 0.295  | 0.415 |
| 2.96754236210397e-18 | 9                  | HNRNPR  | Memory | LGALS1 |       |
| 2.04322131816797e-22 | -0.45607116103685  |         |        | 0.225  | 0.33  |
| 3.64285928816167e-18 | 9                  | SLC3A2  | Memory | LGALS1 |       |
| 3.32551467398807e-22 | 0.304464747696518  |         |        | 0.356  | 0.241 |
| 5.92906011225333e-18 | 9                  | RASGRP2 | Memory | LGALS1 |       |
| 3.53741755995503e-22 | -0.565799156898222 |         |        | 0.063  | 0.133 |
| 6.30686176764382e-18 | 9                  | MYC     | Memory | LGALS1 |       |
| 6.16842768777741e-22 | 0.32572479928975   |         | 0.298  | 0.193  |       |
| 1.09976897245383e-17 | 9                  | TYMP    | Memory | LGALS1 |       |
| 1.01939954439017e-21 | 0.302742569788082  |         |        | 0.309  | 0.202 |
| 1.81748744769324e-17 | 9                  | PRKCB   | Memory | LGALS1 |       |
| 1.0586556755365e-21  | -0.380029773118299 |         |        | 0.216  | 0.33  |
| 1.88747720391402e-17 | 9                  | PMAIP1  | Memory | LGALS1 |       |
| 2.08144644888022e-21 | -0.464053989862221 |         |        | 0.826  | 0.857 |
| 3.71101087370854e-17 | 9                  | CD79B   | Memory | LGALS1 |       |
| 2.10484730975321e-21 | -0.309347942968846 |         |        | 0.08   | 0.166 |
| 3.752732268559e-17   | 9                  | MRT04   | Memory | LGALS1 |       |
| 2.39187503573143e-21 | -0.3820012619848   |         | 0.197  | 0.305  |       |
| 4.26447400120557e-17 | 9                  | NOP58   | Memory | LGALS1 |       |
| 2.42231294392117e-21 | 0.309752348189643  |         |        | 0.746  | 0.677 |
| 4.31874174771706e-17 | 9                  | HLA-DMA | Memory | LGALS1 |       |
| 2.66509040046091e-21 | 0.306956678548375  |         |        | 0.172  | 0.1   |
| 4.75158967498175e-17 | 9                  | RUNX3   | Memory | LGALS1 |       |
| 2.75650960269859e-21 | -0.430556538748413 |         |        | 0.333  | 0.443 |
| 4.91458097065132e-17 | 9                  | RHOH    | Memory | LGALS1 |       |
| 2.76357749942548e-21 | -0.417497146613258 |         |        | 0.56   | 0.636 |
| 4.92718232372569e-17 | 9                  | PSMA4   | Memory | LGALS1 |       |
| 3.13331501897914e-21 | -0.488460851572127 |         |        | 0.228  | 0.32  |
| 5.58638734733791e-17 | 9                  | DDX21   | Memory | LGALS1 |       |
| 3.66354535629281e-21 | -0.422754934183938 |         |        | 0.103  | 0.186 |
| 6.53173501573445e-17 | 9                  | PLPP5   | Memory | LGALS1 |       |
| 4.1688571358436e-21  | 0.315044297476924  |         |        | 0.375  | 0.28  |
| 7.43265538749556e-17 | 9                  | MTPN    | Memory | LGALS1 |       |
| 4.89496902795978e-21 | 0.340063182596961  |         |        | 0.172  | 0.11  |
| 8.7272402799495e-17  | 9                  | TRAC    | Memory | LGALS1 |       |
| 5.81308400748137e-21 | -0.437023973667705 |         |        | 0.198  | 0.307 |
| 1.03641474769385e-16 | 9                  | BCL7A   | Memory | LGALS1 |       |
| 6.95929941000359e-21 | 0.330305878519438  |         |        | 0.299  | 0.216 |
| 1.24077349180954e-16 | 9                  | GNAI2   | Memory | LGALS1 |       |
| 1.00033286667792e-20 | -0.416770883832436 |         |        | 0.299  | 0.403 |
| 1.78349346800007e-16 | 9                  | REL     | Memory | LGALS1 |       |
| 1.18645154823189e-20 | -0.361767030846608 |         |        | 0.079  | 0.172 |



|                      |   |         |        |        |                    |             |
|----------------------|---|---------|--------|--------|--------------------|-------------|
| 2.11532446534265e-16 | 9 | CCDC88A | Memory | LGALS1 |                    |             |
| 1.21086143564936e-20 |   |         |        |        | -0.309928932959723 | 0.056 0.131 |
| 2.15884485361924e-16 | 9 | ICAM2   | Memory | LGALS1 |                    |             |
| 1.91708159874923e-20 |   |         |        |        | -0.315349017981571 | 0.122 0.221 |
| 3.41796478241e-16    | 9 | MRPL12  | Memory | LGALS1 |                    |             |
| 1.9673169758534e-20  |   |         |        |        | -0.460065153442706 | 0.368 0.211 |
| 3.50752943624902e-16 | 9 | IGHG1   | Memory | LGALS1 |                    |             |
| 3.7278188842298e-20  |   |         |        |        | -0.440605699546904 | 0.141 0.233 |
| 6.64632828869332e-16 | 9 | CKS2    | Memory | LGALS1 |                    |             |
| 5.32920747678802e-20 |   |         |        |        | -0.474330465455124 | 0.414 0.5   |
| 9.50144401036535e-16 | 9 | HSPE1   | Memory | LGALS1 |                    |             |
| 6.26814637509261e-20 |   |         |        |        | 0.317513791180903  | 0.302 0.214 |
| 1.11754781721526e-15 | 9 | C4orf48 | Memory | LGALS1 |                    |             |
| 7.79315217975438e-20 |   |         |        |        | -0.549905311362788 | 0.227 0.319 |
| 1.38944110212841e-15 | 9 | CD69    | Memory | LGALS1 |                    |             |
| 8.91343264225348e-20 |   |         |        |        | 0.30542354132917   | 0.271 0.171 |
| 1.58917590578737e-15 | 9 | ASAH1   | Memory | LGALS1 |                    |             |
| 9.20650825518688e-20 |   |         |        |        | -0.382334484818221 | 0.304 0.404 |
| 1.64142835681727e-15 | 9 | RPA3    | Memory | LGALS1 |                    |             |
| 1.12451690577821e-19 |   |         |        |        | -0.430869682646051 | 0.511 0.62  |
| 2.00490119131198e-15 | 9 | MEF2C   | Memory | LGALS1 |                    |             |
| 1.25553810248154e-19 |   |         |        |        | -0.385704145190449 | 0.322 0.429 |
| 2.23849888291433e-15 | 9 | CD40    | Memory | LGALS1 |                    |             |
| 1.4779505616671e-19  |   |         |        |        | 0.319814068712071  | 0.406 0.31  |
| 2.63503805639626e-15 | 9 | LPXN    | Memory | LGALS1 |                    |             |
| 2.30495660655752e-19 |   |         |        |        | -0.393616756364991 | 0.252 0.352 |
| 4.10950713383141e-15 | 9 | TIMM13  | Memory | LGALS1 |                    |             |
| 2.63389265699676e-19 |   |         |        |        | -0.457903001020402 | 0.241 0.334 |
| 4.69596721815953e-15 | 9 | GRHPR   | Memory | LGALS1 |                    |             |
| 2.82270470478569e-19 |   |         |        |        | -0.310078877372552 | 0.134 0.231 |
| 5.03260021816241e-15 | 9 | MRPL3   | Memory | LGALS1 |                    |             |
| 3.95966720559669e-19 |   |         |        |        | -0.390595464688841 | 0.269 0.365 |
| 7.05969066085835e-15 | 9 | HSPA9   | Memory | LGALS1 |                    |             |
| 7.23957285320521e-19 |   |         |        |        | -0.355598596243202 | 0.156 0.249 |
| 1.29074344399796e-14 | 9 | DKC1    | Memory | LGALS1 |                    |             |
| 7.56734415811223e-19 |   |         |        |        | -0.356341543757687 | 0.139 0.237 |
| 1.34918178994983e-14 | 9 | ZCCHC7  | Memory | LGALS1 |                    |             |
| 9.02595346507486e-19 |   |         |        |        | -0.315462730348698 | 0.12 0.204  |
| 1.6092372432882e-14  | 9 | NPM3    | Memory | LGALS1 |                    |             |
| 1.02254657726042e-18 |   |         |        |        | -0.303506590633088 | 0.073 0.145 |
| 1.82309829259761e-14 | 9 | NOP16   | Memory | LGALS1 |                    |             |
| 1.17466443714121e-18 |   |         |        |        | -0.459737842884598 | 0.336 0.42  |
| 2.09430922497907e-14 | 9 | METAP2  | Memory | LGALS1 |                    |             |
| 1.22853675954958e-18 |   |         |        |        | -0.365068311175253 | 0.616 0.68  |
| 2.19035818860095e-14 | 9 | HNRNPA3 | Memory | LGALS1 |                    |             |
| 1.45299506006642e-18 |   |         |        |        | -1.36313084278112  | 0.335 0.405 |
| 2.59054489259243e-14 | 9 | JCHAIN  | Memory | LGALS1 |                    |             |
| 1.45935038139688e-18 |   |         |        |        | -0.457657362848611 | 0.464 0.532 |
| 2.60187579499251e-14 | 9 | PSME2   | Memory | LGALS1 |                    |             |
| 1.47690926894269e-18 |   |         |        |        | -0.542415082539129 | 0.262 0.343 |

|                      |                    |          |        |        |       |
|----------------------|--------------------|----------|--------|--------|-------|
| 2.63318153559793e-14 | 9                  | LRMP     | Memory | LGALS1 |       |
| 1.9153019109664e-18  | -1.55897134468375  |          |        | 0.206  | 0.123 |
| 3.41479177706199e-14 | 9                  | IGHG2    | Memory | LGALS1 |       |
| 1.97434036208749e-18 | -0.385056558337034 |          |        | 0.507  | 0.588 |
| 3.52005143156579e-14 | 9                  | EIF2S2   | Memory | LGALS1 |       |
| 2.89430313608947e-18 | -0.366510730052547 |          |        | 0.178  | 0.278 |
| 5.16025306133391e-14 | 9                  | ITGAE    | Memory | LGALS1 |       |
| 8.68229363224825e-18 | -0.36030936354174  |          |        | 0.364  | 0.46  |
| 1.54796613169354e-13 | 9                  | SFPQ     | Memory | LGALS1 |       |
| 9.6818618159949e-18  | -0.311570289291061 |          |        | 0.107  | 0.187 |
| 1.72617914317373e-13 | 9                  | FKBP4    | Memory | LGALS1 |       |
| 1.10857607963381e-17 | 0.325437225524215  |          |        | 0.609  | 0.5   |
| 1.97648029237911e-13 | 9                  | HLA-DRB5 | Memory | LGALS1 |       |
| 1.33631732237586e-17 | -0.318887890746555 |          |        | 0.147  | 0.239 |
| 2.38252015406392e-13 | 9                  | NIFK     | Memory | LGALS1 |       |
| 1.81821494989676e-17 | -0.300126610142314 |          |        | 0.104  | 0.189 |
| 3.24169543417093e-13 | 9                  | WDR43    | Memory | LGALS1 |       |
| 2.12686297139912e-17 | -0.312707496762889 |          |        | 0.173  | 0.273 |
| 3.79198399170749e-13 | 9                  | TOP1     | Memory | LGALS1 |       |
| 2.42673265523999e-17 | -0.307481541378226 |          |        | 0.92   | 0.927 |
| 4.32662165102738e-13 | 9                  | HNRNPA1  | Memory | LGALS1 |       |
| 2.6131531534324e-17  | 0.32305944359235   | 0.223    |        | 0.161  |       |
| 4.65899075725463e-13 | 9                  | LYPLAL1  | Memory | LGALS1 |       |
| 3.2184952511847e-17  | -0.35084644341771  |          |        | 0.338  | 0.438 |
| 5.73825518333721e-13 | 9                  | EIF5B    | Memory | LGALS1 |       |
| 3.69004668207236e-17 | -0.355156115786968 |          |        | 0.088  | 0.157 |
| 6.57898422946681e-13 | 9                  | MCM7     | Memory | LGALS1 |       |
| 3.81778817082513e-17 | -0.329271074167427 |          |        | 0.08   | 0.154 |
| 6.80673452976413e-13 | 9                  | CD72     | Memory | LGALS1 |       |
| 4.30980889878882e-17 | -0.360406487352039 |          |        | 0.077  | 0.139 |
| 7.6839582856506e-13  | 9                  | FCER2    | Memory | LGALS1 |       |
| 6.39228370795353e-17 | -0.50937259906371  |          |        | 0.197  | 0.28  |
| 1.13968026229103e-12 | 9                  | HSPA5    | Memory | LGALS1 |       |
| 6.58701558334845e-17 | -0.38019111353976  |          |        | 0.221  | 0.306 |
| 1.17439900835519e-12 | 9                  | ODC1     | Memory | LGALS1 |       |
| 8.33530233016148e-17 | -0.342926465355086 |          |        | 0.376  | 0.469 |
| 1.48610105244449e-12 | 9                  | PRDX6    | Memory | LGALS1 |       |
| 9.39674546346099e-17 | -0.35716521151383  |          |        | 0.341  | 0.434 |
| 1.67534574868046e-12 | 9                  | SLIRP    | Memory | LGALS1 |       |
| 1.42124439052937e-16 | -0.584702234956614 |          |        | 0.334  | 0.406 |
| 2.53393662387481e-12 | 9                  | FABP5    | Memory | LGALS1 |       |
| 2.9694060212919e-16  | -0.395971034045718 |          |        | 0.191  | 0.28  |
| 5.29415399536132e-12 | 9                  | PIM2     | Memory | LGALS1 |       |
| 4.36652812586327e-16 | -0.300290504557109 |          |        | 0.148  | 0.241 |
| 7.78508299560163e-12 | 9                  | AMD1     | Memory | LGALS1 |       |
| 5.64676905277375e-16 | -0.310912278983336 |          |        | 0.226  | 0.327 |
| 1.00676245441903e-11 | 9                  | IMP4     | Memory | LGALS1 |       |
| 7.70743673424036e-16 | -0.330971603379301 |          |        | 0.332  | 0.423 |
| 1.37415889534771e-11 | 9                  | MAGOH    | Memory | LGALS1 |       |
| 9.62933081405067e-16 | -0.322123849307589 |          |        | 0.492  | 0.569 |

|                      |                    |          |        |        |       |
|----------------------|--------------------|----------|--------|--------|-------|
| 1.71681339083709e-11 | 9                  | UQCRQ    | Memory | LGALS1 |       |
| 9.76512665967551e-16 | -0.592723469681478 |          |        | 0.545  | 0.578 |
| 1.74102443215355e-11 | 9                  | TUBB     | Memory | LGALS1 |       |
| 1.24658657471924e-15 | -0.344769494870778 |          |        | 0.263  | 0.349 |
| 2.22253920406693e-11 | 9                  | H2AFY    | Memory | LGALS1 |       |
| 2.29404464920475e-15 | -0.334797765571977 |          |        | 0.138  | 0.221 |
| 4.09005220506716e-11 | 9                  | NANS     | Memory | LGALS1 |       |
| 2.82010691166036e-15 | -0.456919166811136 |          |        | 0.735  | 0.748 |
| 5.02796861279926e-11 | 9                  | HSP90AA1 | Memory | LGALS1 |       |
| 3.08584880158257e-15 | -0.358199080442001 |          |        | 0.124  | 0.197 |
| 5.50175982834156e-11 | 9                  | FAM129C  | Memory | LGALS1 |       |
| 3.29627526122292e-15 | -0.358636487926524 |          |        | 0.313  | 0.396 |
| 5.87692916323434e-11 | 9                  | YWHAE    | Memory | LGALS1 |       |
| 3.40362808517646e-15 | -0.301066026924361 |          |        | 0.275  | 0.37  |
| 6.06832851306112e-11 | 9                  | EWSR1    | Memory | LGALS1 |       |
| 6.90940428993891e-15 | -0.309007528453016 |          |        | 0.305  | 0.396 |
| 1.23187769085321e-10 | 9                  | PHB      | Memory | LGALS1 |       |
| 7.51514188282256e-15 | -0.35090507263913  |          |        | 0.455  | 0.532 |
| 1.33987464628843e-10 | 9                  | SRSF7    | Memory | LGALS1 |       |
| 1.09638001103174e-14 | -0.377740671820439 |          |        | 0.6    | 0.647 |
| 1.9547359216685e-10  | 9                  | SNRPG    | Memory | LGALS1 |       |
| 1.11562583035444e-14 | -0.308947846147524 |          |        | 0.171  | 0.255 |
| 1.98904929293892e-10 | 9                  | SLC50A1  | Memory | LGALS1 |       |
| 1.15555968277166e-14 | -0.319473994801046 |          |        | 0.242  | 0.332 |
| 2.0602473584136e-10  | 9                  | RFTN1    | Memory | LGALS1 |       |
| 1.1986082016039e-14  | -0.329517246895043 |          |        | 0.535  | 0.596 |
| 2.1369985626396e-10  | 9                  | SRSF2    | Memory | LGALS1 |       |
| 1.45487137883955e-14 | -0.508033368029828 |          |        | 0.294  | 0.394 |
| 2.59389018133304e-10 | 9                  | EIF5A    | Memory | LGALS1 |       |
| 1.66876076793211e-14 | -0.317488739469606 |          |        | 0.44   | 0.517 |
| 2.97523357314616e-10 | 9                  | SSBP1    | Memory | LGALS1 |       |
| 1.99533259329424e-14 | -0.388328464152102 |          |        | 0.535  | 0.585 |
| 3.5574784805843e-10  | 9                  | ANP32B   | Memory | LGALS1 |       |
| 3.67347740525205e-14 | -0.544532697280689 |          |        | 0.729  | 0.751 |
| 6.54944286582387e-10 | 9                  | CXCR4    | Memory | LGALS1 |       |
| 4.06130414673133e-14 | -0.356718508934741 |          |        | 0.209  | 0.291 |
| 7.24089916320728e-10 | 9                  | RUBCNL   | Memory | LGALS1 |       |
| 4.14902169623601e-14 | -0.326444671279439 |          |        | 0.339  | 0.422 |
| 7.39729078221919e-10 | 9                  | HNRNPD   | Memory | LGALS1 |       |
| 4.56120815162179e-14 | -0.341490652076106 |          |        | 0.37   | 0.444 |
| 8.13217801352649e-10 | 9                  | PPA1     | Memory | LGALS1 |       |
| 5.17551027832544e-14 | -0.322454099728468 |          |        | 0.065  | 0.123 |
| 9.22741727522642e-10 | 9                  | LPP      | Memory | LGALS1 |       |
| 7.33953521542454e-14 | -0.352538230625682 |          |        | 0.557  | 0.609 |
| 1.30856573355804e-09 | 9                  | POMP     | Memory | LGALS1 |       |
| 1.03631413206659e-13 | -0.343199786317848 |          |        | 0.317  | 0.4   |
| 1.84764446606153e-09 | 9                  | NUCKS1   | Memory | LGALS1 |       |
| 1.50710826559458e-13 | -0.326364273511509 |          |        | 0.831  | 0.867 |
| 2.68702332672857e-09 | 9                  | CD79A    | Memory | LGALS1 |       |
| 3.08089216998934e-13 | -0.309379997320601 |          |        | 0.224  | 0.305 |

|                      |                    |          |        |        |       |
|----------------------|--------------------|----------|--------|--------|-------|
| 5.492922649874e-09   | 9                  | ATP1B3   | Memory | LGALS1 |       |
| 7.31785946690245e-13 | -0.313978501430269 |          |        | 0.387  | 0.459 |
| 1.30470116435404e-08 | 9                  | LSM5     | Memory | LGALS1 |       |
| 7.34448333572519e-13 | -0.30395342870923  |          |        | 0.124  | 0.194 |
| 1.30944793392644e-08 | 9                  | MANF     | Memory | LGALS1 |       |
| 7.72192991944787e-13 | -0.317633859366762 |          |        | 0.349  | 0.431 |
| 1.37674288533836e-08 | 9                  | DNAJA1   | Memory | LGALS1 |       |
| 7.96825191948504e-13 | -0.305226972723458 |          |        | 0.356  | 0.438 |
| 1.42065963472499e-08 | 9                  | ROM01    | Memory | LGALS1 |       |
| 1.4922769656538e-12  | -0.368607475784618 |          |        | 0.96   | 0.941 |
| 2.66058060206416e-08 | 9                  | YBX1     | Memory | LGALS1 |       |
| 1.72733910639863e-12 | -2.1910792632157   | 0.594    |        | 0.445  |       |
| 3.07967289279812e-08 | 9                  | IGHG3    | Memory | LGALS1 |       |
| 1.76866860890692e-12 | -0.324982114641605 |          |        | 0.281  | 0.363 |
| 3.15335926282015e-08 | 9                  | TPD52    | Memory | LGALS1 |       |
| 2.39107664201328e-12 | -0.316892017785042 |          |        | 0.516  | 0.573 |
| 4.26305054504547e-08 | 9                  | RBM8A    | Memory | LGALS1 |       |
| 2.63436843332682e-12 | -0.331011016666275 |          |        | 0.511  | 0.561 |
| 4.69681547977838e-08 | 9                  | ATP5PF   | Memory | LGALS1 |       |
| 5.98884513826886e-12 | -0.346754989174854 |          |        | 0.169  | 0.222 |
| 1.06775119970196e-07 | 9                  | GBP2     | Memory | LGALS1 |       |
| 6.14327916904171e-12 | -0.303819513912861 |          |        | 0.187  | 0.268 |
| 1.09528524304845e-07 | 9                  | FAM3C    | Memory | LGALS1 |       |
| 1.24077707905749e-11 | -0.489082700978345 |          |        | 0.584  | 0.6   |
| 2.21218145425159e-07 | 9                  | PRDX1    | Memory | LGALS1 |       |
| 1.40203890001346e-11 | -0.358330293213747 |          |        | 0.491  | 0.536 |
| 2.49969515483399e-07 | 9                  | SRSF9    | Memory | LGALS1 |       |
| 1.41775717713777e-11 | -0.317797823749819 |          |        | 0.389  | 0.454 |
| 2.52771927111893e-07 | 9                  | MRPL51   | Memory | LGALS1 |       |
| 2.21796231513267e-11 | -0.314181404793345 |          |        | 0.208  | 0.28  |
| 3.95440501165005e-07 | 9                  | GADD45B  | Memory | LGALS1 |       |
| 7.0633377047716e-11  | 0.314095754180168  |          |        | 0.205  | 0.159 |
| 1.25932247938373e-06 | 9                  | C12orf75 | Memory | LGALS1 |       |
| 1.05062799476851e-10 | -0.302205760534157 |          |        | 0.431  | 0.504 |
| 1.87316465187277e-06 | 9                  | FOXP1    | Memory | LGALS1 |       |
| 1.74654331447137e-10 | -0.49257721753116  |          |        | 0.721  | 0.715 |
| 3.113912075371e-06   | 9                  | EN01     | Memory | LGALS1 |       |
| 2.09568950509544e-10 | -0.386005211897247 |          |        | 0.575  | 0.597 |
| 3.73640481863466e-06 | 9                  | LDHA     | Memory | LGALS1 |       |
| 2.41600979716541e-10 | -0.353097172418239 |          |        | 0.295  | 0.355 |
| 4.3075038673662e-06  | 9                  | TUBB4B   | Memory | LGALS1 |       |
| 2.71148687497797e-10 | -0.333823367611028 |          |        | 0.602  | 0.638 |
| 4.83430994939822e-06 | 9                  | SET      | Memory | LGALS1 |       |
| 3.01356606196319e-10 | -1.17586751741481  |          |        | 0.287  | 0.303 |
| 5.37288693187417e-06 | 9                  | HMGB2    | Memory | LGALS1 |       |
| 4.56504929263572e-10 | -0.343840650490116 |          |        | 0.318  | 0.377 |
| 8.13902638384023e-06 | 9                  | ACADM    | Memory | LGALS1 |       |
| 6.58978814942538e-10 | -0.30003035278448  |          |        | 0.752  | 0.76  |
| 1.17489332916105e-05 | 9                  | PSMA7    | Memory | LGALS1 |       |
| 6.99763583896739e-10 | -0.417122220055164 |          |        | 0.496  | 0.535 |

|                      |                    |         |        |        |       |          |    |  |
|----------------------|--------------------|---------|--------|--------|-------|----------|----|--|
| 1.2476084937295e-05  | 9                  | ISG20   | Memory | LGALS1 |       |          |    |  |
| 7.14446009626146e-10 | -0.321357818655291 |         |        |        | 0.088 | 0.151    |    |  |
| 1.27378579056246e-05 | 9                  | BIK     | Memory | LGALS1 |       |          |    |  |
| 9.62617306862667e-10 | -0.35802639917841  |         |        |        | 0.098 | 0.153    |    |  |
| 1.71625039640545e-05 | 9                  | DUSP2   | Memory | LGALS1 |       |          |    |  |
| 1.04855260903998e-09 | -0.311836937852273 |         |        |        | 0.277 | 0.349    |    |  |
| 1.86946444665738e-05 | 9                  | BIRC3   | Memory | LGALS1 |       |          |    |  |
| 2.94119503872202e-09 | -0.320257517330798 |         |        |        | 0.234 | 0.298    |    |  |
| 5.24385663453749e-05 | 9                  | NFKBIA  | Memory | LGALS1 |       |          |    |  |
| 1.59112669678321e-08 | -0.316181477471439 |         |        |        | 0.572 | 0.599    |    |  |
| 0.000283681978769479 | 9                  | SEC61B  | Memory | LGALS1 |       |          |    |  |
| 1.03810230194187e-07 | -0.342516508601297 |         |        |        | 0.948 | 0.929    |    |  |
| 0.00185083259413217  | 9                  | NPM1    | Memory | LGALS1 |       |          |    |  |
| 2.21348340007541e-07 | -0.38710130082373  |         |        |        | 0.942 | 0.932    |    |  |
| 0.00394641955399444  | 9                  | HMGB1   | Memory | LGALS1 |       |          |    |  |
| 3.93836179600569e-06 | -0.311679648983205 |         |        |        | 0.404 | 0.43     |    |  |
| 0.0702170524609855   | 9                  | IRF8    | Memory | LGALS1 |       |          |    |  |
| 7.3864534598298e-06  | -0.32179577138185  |         |        |        | 0.302 | 0.336    |    |  |
| 0.131693078735306    | 9                  | DUT     | Memory | LGALS1 |       |          |    |  |
| 1.03001806267573e-05 | -1.53852508134803  |         |        |        | 0.577 | 0.647    |    |  |
| 0.183641920394457    | 9                  | IGLC2   | Memory | LGALS1 |       |          |    |  |
| 3.85624405822758e-05 | -0.322400049606777 |         |        |        | 0.864 | 0.851    |    |  |
| 0.687529753141395    | 9                  | ATP5MG  | Memory | LGALS1 |       |          |    |  |
| 0.000111195047768837 | -0.403175790107831 |         |        |        | 0.287 | 0.313    | 1  |  |
|                      | 9                  | HSP90B1 | Memory | LGALS1 |       |          |    |  |
| 0.000133465003055907 | -1.11320032615681  |         |        |        | 0.928 | 0.926    | 1  |  |
|                      | 9                  | IGKC    | Memory | LGALS1 |       |          |    |  |
| 0.000218460907813951 | -0.305744240795103 |         |        |        | 0.552 | 0.543    | 1  |  |
|                      | 9                  | CCR7    | Memory | LGALS1 |       |          |    |  |
| 0.000256500200001883 | -0.304368136947543 |         |        |        | 0.173 | 0.21     | 1  |  |
|                      | 9                  | FOS     | Memory | LGALS1 |       |          |    |  |
| 0.000669583225006324 | -0.306960424722957 |         |        |        | 0.947 | 0.933    | 1  |  |
|                      | 9                  | SERF2   | Memory | LGALS1 |       |          |    |  |
| 0.00456205982050845  | -0.375230733755767 |         |        |        | 0.497 | 0.499    | 1  |  |
|                      | 9                  | SSR4    | Memory | LGALS1 |       |          |    |  |
| 0.00538754653992973  | -1.10725808143919  |         |        |        | 0.404 | 0.43     | 1  |  |
|                      | 9                  | IGLC3   | Memory | LGALS1 |       |          |    |  |
| 0                    | 4.4199108849186    | 0.965   | 0.404  | 0      | 10    | HIST1H4C | DZ |  |
| 1                    |                    |         |        |        |       |          |    |  |
| 0                    | 2.80634383472283   | 0.994   | 0.279  | 0      | 10    | HMGB2    | DZ |  |
| 1                    |                    |         |        |        |       |          |    |  |
| 0                    | 2.74930040757588   | 0.993   | 0.409  | 0      | 10    | STMN1    | DZ |  |
| 1                    |                    |         |        |        |       |          |    |  |
| 0                    | 2.73523424631451   | 0.942   | 0.066  | 0      | 10    | PCLAF    | DZ |  |
| 1                    |                    |         |        |        |       |          |    |  |
| 0                    | 2.54446607867781   | 0.984   | 0.655  | 0      | 10    | TUBA1B   | DZ |  |
| 1                    |                    |         |        |        |       |          |    |  |
| 0                    | 2.47769158204973   | 0.868   | 0.039  | 0      | 10    | TK1      | DZ |  |
| 1                    |                    |         |        |        |       |          |    |  |
| 0                    | 2.45724866986668   | 0.798   | 0.019  | 0      | 10    | RRM2     | DZ |  |

|   |                  |       |       |   |    |        |    |  |
|---|------------------|-------|-------|---|----|--------|----|--|
| 1 |                  |       |       |   |    |        |    |  |
| 0 | 2.35754723068359 | 0.974 | 0.314 | 0 | 10 | DUT    | DZ |  |
| 1 |                  |       |       |   |    |        |    |  |
| 0 | 2.33040970584133 | 0.892 | 0.031 | 0 | 10 | TYMS   | DZ |  |
| 1 |                  |       |       |   |    |        |    |  |
| 0 | 2.29099883109967 | 0.986 | 0.563 | 0 | 10 | TUBB   | DZ |  |
| 1 |                  |       |       |   |    |        |    |  |
| 0 | 2.28432637548716 | 0.999 | 0.706 | 0 | 10 | HMG2   | DZ |  |
| 1 |                  |       |       |   |    |        |    |  |
| 0 | 2.1852835565387  | 0.996 | 0.686 | 0 | 10 | H2AFZ  | DZ |  |
| 1 |                  |       |       |   |    |        |    |  |
| 0 | 2.14606467413439 | 0.804 | 0.035 | 0 | 10 | MKI67  | DZ |  |
| 1 |                  |       |       |   |    |        |    |  |
| 0 | 2.11408367110249 | 0.873 | 0.165 | 0 | 10 | PCNA   | DZ |  |
| 1 |                  |       |       |   |    |        |    |  |
| 0 | 2.08998908147668 | 0.831 | 0.056 | 0 | 10 | NUSAP1 | DZ |  |
| 1 |                  |       |       |   |    |        |    |  |
| 0 | 2.057025070838   | 0.902 | 0.129 | 0 | 10 | MCM7   | DZ |  |
| 1 |                  |       |       |   |    |        |    |  |
| 0 | 1.90041199748346 | 0.806 | 0.028 | 0 | 10 | CDK1   | DZ |  |
| 1 |                  |       |       |   |    |        |    |  |
| 0 | 1.89471912671013 | 0.867 | 0.074 | 0 | 10 | CENPM  | DZ |  |
| 1 |                  |       |       |   |    |        |    |  |
| 0 | 1.8555819718454  | 0.732 | 0.046 | 0 | 10 | TOP2A  | DZ |  |
| 1 |                  |       |       |   |    |        |    |  |
| 0 | 1.79178936648125 | 0.905 | 0.169 | 0 | 10 | DNMT1  | DZ |  |
| 1 |                  |       |       |   |    |        |    |  |
| 0 | 1.79069513182546 | 0.97  | 0.405 | 0 | 10 | DEK    | DZ |  |
| 1 |                  |       |       |   |    |        |    |  |
| 0 | 1.76134684841963 | 0.808 | 0.037 | 0 | 10 | ZWINT  | DZ |  |
| 1 |                  |       |       |   |    |        |    |  |
| 0 | 1.74801610947188 | 0.999 | 0.93  | 0 | 10 | HMGB1  | DZ |  |
| 1 |                  |       |       |   |    |        |    |  |
| 0 | 1.74491456357069 | 0.877 | 0.145 | 0 | 10 | SMC4   | DZ |  |
| 1 |                  |       |       |   |    |        |    |  |
| 0 | 1.74328356266117 | 0.969 | 0.339 | 0 | 10 | H2AFV  | DZ |  |
| 1 |                  |       |       |   |    |        |    |  |
| 0 | 1.70062019364345 | 0.845 | 0.091 | 0 | 10 | FEN1   | DZ |  |
| 1 |                  |       |       |   |    |        |    |  |
| 0 | 1.69133398444566 | 0.886 | 0.221 | 0 | 10 | SLBP   | DZ |  |
| 1 |                  |       |       |   |    |        |    |  |
| 0 | 1.66749511548085 | 0.762 | 0.023 | 0 | 10 | ASF1B  | DZ |  |
| 1 |                  |       |       |   |    |        |    |  |
| 0 | 1.66187614439689 | 0.799 | 0.08  | 0 | 10 | RMI2   | DZ |  |
| 1 |                  |       |       |   |    |        |    |  |
| 0 | 1.65106239687911 | 0.736 | 0.055 | 0 | 10 | GINS2  | DZ |  |
| 1 |                  |       |       |   |    |        |    |  |
| 0 | 1.6480170326103  | 0.93  | 0.182 | 0 | 10 | RGS13  | DZ |  |
| 1 |                  |       |       |   |    |        |    |  |
| 0 | 1.63692220913379 | 0.999 | 0.884 | 0 | 10 | GAPDH  | DZ |  |

|   |                  |       |       |   |    |         |    |  |
|---|------------------|-------|-------|---|----|---------|----|--|
| 1 |                  |       |       |   |    |         |    |  |
| 0 | 1.63605167645583 | 0.841 | 0.076 | 0 | 10 | MYBL2   | DZ |  |
| 1 |                  |       |       |   |    |         |    |  |
| 0 | 1.58839795483027 | 0.666 | 0.029 | 0 | 10 | AURKB   | DZ |  |
| 1 |                  |       |       |   |    |         |    |  |
| 0 | 1.58364537133788 | 0.661 | 0.035 | 0 | 10 | UBE2C   | DZ |  |
| 1 |                  |       |       |   |    |         |    |  |
| 0 | 1.51014039995222 | 0.923 | 0.263 | 0 | 10 | CARHSP1 | DZ |  |
| 1 |                  |       |       |   |    |         |    |  |
| 0 | 1.48863546348489 | 0.831 | 0.177 | 0 | 10 | MCM3    | DZ |  |
| 1 |                  |       |       |   |    |         |    |  |
| 0 | 1.47898341603261 | 0.959 | 0.325 | 0 | 10 | H2AFY   | DZ |  |
| 1 |                  |       |       |   |    |         |    |  |
| 0 | 1.4604850173818  | 0.795 | 0.093 | 0 | 10 | LMNB1   | DZ |  |
| 1 |                  |       |       |   |    |         |    |  |
| 0 | 1.43826252204188 | 0.724 | 0.049 | 0 | 10 | DHFR    | DZ |  |
| 1 |                  |       |       |   |    |         |    |  |
| 0 | 1.41877169190913 | 0.763 | 0.077 | 0 | 10 | RRM1    | DZ |  |
| 1 |                  |       |       |   |    |         |    |  |
| 0 | 1.4109171863419  | 0.96  | 0.422 | 0 | 10 | HMGA1   | DZ |  |
| 1 |                  |       |       |   |    |         |    |  |
| 0 | 1.40748731281484 | 0.875 | 0.216 | 0 | 10 | GCHFR   | DZ |  |
| 1 |                  |       |       |   |    |         |    |  |
| 0 | 1.39960629268357 | 0.807 | 0.207 | 0 | 10 | MCM5    | DZ |  |
| 1 |                  |       |       |   |    |         |    |  |
| 0 | 1.39600556734166 | 0.997 | 0.76  | 0 | 10 | HMG1    | DZ |  |
| 1 |                  |       |       |   |    |         |    |  |
| 0 | 1.39439835636735 | 0.89  | 0.167 | 0 | 10 | PTTG1   | DZ |  |
| 1 |                  |       |       |   |    |         |    |  |
| 0 | 1.39385701745007 | 0.831 | 0.181 | 0 | 10 | HMCES   | DZ |  |
| 1 |                  |       |       |   |    |         |    |  |
| 0 | 1.39061579536485 | 0.851 | 0.216 | 0 | 10 | CCND3   | DZ |  |
| 1 |                  |       |       |   |    |         |    |  |
| 0 | 1.38914489840895 | 0.722 | 0.057 | 0 | 10 | GMNN    | DZ |  |
| 1 |                  |       |       |   |    |         |    |  |
| 0 | 1.37260831633725 | 0.677 | 0.02  | 0 | 10 | CLSPN   | DZ |  |
| 1 |                  |       |       |   |    |         |    |  |
| 0 | 1.36780632036442 | 0.684 | 0.022 | 0 | 10 | CDT1    | DZ |  |
| 1 |                  |       |       |   |    |         |    |  |
| 0 | 1.36666111997599 | 0.89  | 0.213 | 0 | 10 | UBE2J1  | DZ |  |
| 1 |                  |       |       |   |    |         |    |  |
| 0 | 1.36091002764956 | 0.707 | 0.052 | 0 | 10 | CDCA7   | DZ |  |
| 1 |                  |       |       |   |    |         |    |  |
| 0 | 1.34966733822197 | 0.842 | 0.145 | 0 | 10 | CCDC167 | DZ |  |
| 1 |                  |       |       |   |    |         |    |  |
| 0 | 1.34698105145718 | 0.806 | 0.119 | 0 | 10 | SMC2    | DZ |  |
| 1 |                  |       |       |   |    |         |    |  |
| 0 | 1.31491414804085 | 0.833 | 0.146 | 0 | 10 | TFDP1   | DZ |  |
| 1 |                  |       |       |   |    |         |    |  |
| 0 | 1.31350084152537 | 0.67  | 0.044 | 0 | 10 | BIRC5   | DZ |  |

|   |                  |       |       |   |    |          |    |  |
|---|------------------|-------|-------|---|----|----------|----|--|
| 1 |                  |       |       |   |    |          |    |  |
| 0 | 1.3017144767156  | 0.66  | 0.045 | 0 | 10 | CDKN3    | DZ |  |
| 1 |                  |       |       |   |    |          |    |  |
| 0 | 1.29102043566948 | 0.903 | 0.293 | 0 | 10 | PSIP1    | DZ |  |
| 1 |                  |       |       |   |    |          |    |  |
| 0 | 1.26634464880253 | 0.585 | 0.013 | 0 | 10 | SPC25    | DZ |  |
| 1 |                  |       |       |   |    |          |    |  |
| 0 | 1.25501646644433 | 0.776 | 0.14  | 0 | 10 | C12orf75 | DZ |  |
| 1 |                  |       |       |   |    |          |    |  |
| 0 | 1.25165243582616 | 0.986 | 0.646 | 0 | 10 | SLC25A5  | DZ |  |
| 1 |                  |       |       |   |    |          |    |  |
| 0 | 1.24517655457653 | 0.608 | 0.014 | 0 | 10 | UHRF1    | DZ |  |
| 1 |                  |       |       |   |    |          |    |  |
| 0 | 1.2394970531344  | 0.854 | 0.226 | 0 | 10 | CKS1B    | DZ |  |
| 1 |                  |       |       |   |    |          |    |  |
| 0 | 1.23629248766398 | 0.655 | 0.036 | 0 | 10 | CENPU    | DZ |  |
| 1 |                  |       |       |   |    |          |    |  |
| 0 | 1.23238093042563 | 0.682 | 0.113 | 0 | 10 | PHGDH    | DZ |  |
| 1 |                  |       |       |   |    |          |    |  |
| 0 | 1.21911264697799 | 0.835 | 0.186 | 0 | 10 | EAF2     | DZ |  |
| 1 |                  |       |       |   |    |          |    |  |
| 0 | 1.21839154705266 | 0.979 | 0.57  | 0 | 10 | ANP32B   | DZ |  |
| 1 |                  |       |       |   |    |          |    |  |
| 0 | 1.21644697770988 | 0.724 | 0.056 | 0 | 10 | MAD2L1   | DZ |  |
| 1 |                  |       |       |   |    |          |    |  |
| 0 | 1.21238935605912 | 0.793 | 0.14  | 0 | 10 | DNAJC9   | DZ |  |
| 1 |                  |       |       |   |    |          |    |  |
| 0 | 1.20332090036469 | 0.873 | 0.3   | 0 | 10 | PRDX2    | DZ |  |
| 1 |                  |       |       |   |    |          |    |  |
| 0 | 1.19809786644906 | 0.799 | 0.177 | 0 | 10 | IDH2     | DZ |  |
| 1 |                  |       |       |   |    |          |    |  |
| 0 | 1.19419925291594 | 0.987 | 0.644 | 0 | 10 | TCL1A    | DZ |  |
| 1 |                  |       |       |   |    |          |    |  |
| 0 | 1.1868663204727  | 0.68  | 0.065 | 0 | 10 | TACC3    | DZ |  |
| 1 |                  |       |       |   |    |          |    |  |
| 0 | 1.17960926823733 | 0.795 | 0.211 | 0 | 10 | CKS2     | DZ |  |
| 1 |                  |       |       |   |    |          |    |  |
| 0 | 1.17456024810994 | 0.65  | 0.049 | 0 | 10 | CENPW    | DZ |  |
| 1 |                  |       |       |   |    |          |    |  |
| 0 | 1.15562598823808 | 0.676 | 0.059 | 0 | 10 | UBE2T    | DZ |  |
| 1 |                  |       |       |   |    |          |    |  |
| 0 | 1.15135052746319 | 0.889 | 0.271 | 0 | 10 | SIVA1    | DZ |  |
| 1 |                  |       |       |   |    |          |    |  |
| 0 | 1.14290632503923 | 0.907 | 0.401 | 0 | 10 | METAP2   | DZ |  |
| 1 |                  |       |       |   |    |          |    |  |
| 0 | 1.13795216226611 | 0.957 | 0.469 | 0 | 10 | RANBP1   | DZ |  |
| 1 |                  |       |       |   |    |          |    |  |
| 0 | 1.13631618499314 | 0.97  | 0.575 | 0 | 10 | MARCKSL1 | DZ |  |
| 1 |                  |       |       |   |    |          |    |  |
| 0 | 1.13581836347748 | 0.746 | 0.114 | 0 | 10 | NEIL1    | DZ |  |



|      |                   |       |       |       |    |         |     |  |
|------|-------------------|-------|-------|-------|----|---------|-----|--|
| 1    |                   |       |       |       |    |         |     |  |
| 0    | 1.13479515009969  | 0.684 | 0.074 | 0     | 10 | KIF22   | DZ  |  |
| 1    |                   |       |       |       |    |         |     |  |
| 0    | 1.12468081841215  | 0.762 | 0.133 | 0     | 10 | CD81    | DZ  |  |
| 1    |                   |       |       |       |    |         |     |  |
| 0    | 1.12424421405562  | 0.881 | 0.29  | 0     | 10 | CALM3   | DZ  |  |
| 1    |                   |       |       |       |    |         |     |  |
| 0    | 1.12288078893133  | 0.618 | 0.054 | 0     | 10 | HELLS   | DZ  |  |
| 1    |                   |       |       |       |    |         |     |  |
| 0    | 1.12066545233806  | 0.834 | 0.218 | 0     | 10 | HNRNPAB | DZ  |  |
| 1    |                   |       |       |       |    |         |     |  |
| 0    | 1.11230643199134  | 0.88  | 0.271 | 0     | 10 | YWHAH   | DZ  |  |
| 1    |                   |       |       |       |    |         |     |  |
| 0    | 1.11026208427746  | 0.773 | 0.14  | 0     | 10 | SUSD3   | DZ  |  |
| 1    |                   |       |       |       |    |         |     |  |
| 0    | 1.10939883999436  | 0.967 | 0.473 | 0     | 10 | CBX3    | DZ  |  |
| 1    |                   |       |       |       |    |         |     |  |
| 0    | 1.10844388260521  | 0.688 | 0.075 | 0     | 10 | PXMP2   | DZ  |  |
| 1    |                   |       |       |       |    |         |     |  |
| 0    | 1.10464903618672  | 0.916 | 0.347 | 0     | 10 | RBBP7   | DZ  |  |
| 1    |                   |       |       |       |    |         |     |  |
| 0    | 1.09437543746913  | 0.577 | 0.023 | 0     | 10 | CCNA2   | DZ  |  |
| 1    |                   |       |       |       |    |         |     |  |
| 0    | 1.08666603462984  | 0.566 | 0.021 | 0     | 10 | KIFC1   | DZ  |  |
| 1    |                   |       |       |       |    |         |     |  |
| 0    | 1.06398806005671  | 0.995 | 0.896 | 0     | 10 | PFN1    | DZ  |  |
| 1    |                   |       |       |       |    |         |     |  |
| 0    | 1.04423021128654  | 0.631 | 0.057 | 0     | 10 | EZH2    | DZ  |  |
| 1    |                   |       |       |       |    |         |     |  |
| 0    | 1.04373606515022  | 0.562 | 0.05  | 0     | 10 | MCM6    | DZ  |  |
| 1    |                   |       |       |       |    |         |     |  |
| 0    | 1.04366844697364  | 0.799 | 0.173 | 0     | 10 | CBX5    | DZ  |  |
| 1    |                   |       |       |       |    |         |     |  |
| 0    | 1.04170960099373  | 0.965 | 0.526 | 0     | 10 | PARP1   | DZ  |  |
| 1    |                   |       |       |       |    |         |     |  |
| 0    | 1.0321026249588   | 0.779 | 0.17  | 0     | 10 | USP1    | DZ  |  |
| 1    |                   |       |       |       |    |         |     |  |
| 0    | 1.02132288037074  | 0.561 | 0.036 | 0     | 10 | ATAD2   | DZ  |  |
| 1    |                   |       |       |       |    |         |     |  |
| 0    | 1.01641991684094  | 0.568 | 0.032 | 0     | 10 | SHCBP1  | DZ  |  |
| 1    |                   |       |       |       |    |         |     |  |
| 0    | 1.01093381129735  | 0.507 | 0.022 | 0     | 10 | GTSE1   | DZ  |  |
| 1    |                   |       |       |       |    |         |     |  |
| 0    | 1.01037804174298  | 0.597 | 0.044 | 0     | 10 | ORC6    | DZ  |  |
| 1    |                   |       |       |       |    |         |     |  |
| 0    | 0.998877121858072 |       | 0.921 | 0.384 | 0  | 10      |     |  |
| RPA3 | DZ 1              |       |       |       |    |         |     |  |
| 0    | 0.99676161416102  | 0.959 | 0.458 | 0     | 10 | SNRPD1  | DZ  |  |
| 1    |                   |       |       |       |    |         |     |  |
| 0    | 0.992503737248191 |       | 0.516 | 0.02  | 0  | 10      | PBK |  |

|          |                        |       |       |    |          |    |  |
|----------|------------------------|-------|-------|----|----------|----|--|
|          | DZ 1                   |       |       |    |          |    |  |
| 0        | 0.981942015005227      | 0.575 | 0.042 | 0  | 10       |    |  |
| WDR76    | DZ 1                   |       |       |    |          |    |  |
| 0        | 0.98057125530848 0.962 | 0.492 | 0     | 10 | MZT2B    | DZ |  |
| 1        |                        |       |       |    |          |    |  |
| 0        | 0.977896126710836      | 0.729 | 0.134 | 0  | 10       |    |  |
| DTYMK    | DZ 1                   |       |       |    |          |    |  |
| 0        | 0.976805796876367      | 0.96  | 0.503 | 0  | 10       |    |  |
| COX8A    | DZ 1                   |       |       |    |          |    |  |
| 0        | 0.975963556719097      | 0.605 | 0.041 | 0  | 10       |    |  |
| CENPK    | DZ 1                   |       |       |    |          |    |  |
| 0        | 0.973151652659995      | 0.987 | 0.808 | 0  | 10       |    |  |
| COR01A   | DZ 1                   |       |       |    |          |    |  |
| 0        | 0.97165019166962 0.574 | 0.028 | 0     | 10 | CHAF1A   | DZ |  |
| 1        |                        |       |       |    |          |    |  |
| 0        | 0.969072650186732      | 0.681 | 0.095 | 0  | 10       |    |  |
| SKA2     | DZ 1                   |       |       |    |          |    |  |
| 0        | 0.959695206654478      | 0.549 | 0.024 | 0  | 10       |    |  |
| MND1     | DZ 1                   |       |       |    |          |    |  |
| 0        | 0.954420156464488      | 0.614 | 0.07  | 0  | 10       |    |  |
| CDCA4    | DZ 1                   |       |       |    |          |    |  |
| 0        | 0.939487640214312      | 0.525 | 0.029 | 0  | 10       |    |  |
| MCM4     | DZ 1                   |       |       |    |          |    |  |
| 0        | 0.938879664483908      | 0.996 | 0.938 | 0  | 10       |    |  |
| H3F3A    | DZ 1                   |       |       |    |          |    |  |
| 0        | 0.936021059442328      | 0.999 | 0.989 | 0  | 10       |    |  |
| ACTB     | DZ 1                   |       |       |    |          |    |  |
| 0        | 0.931997762819166      | 0.996 | 0.846 | 0  | 10       |    |  |
| ATP5MG   | DZ 1                   |       |       |    |          |    |  |
| 0        | 0.928478315798025      | 0.999 | 0.931 | 0  | 10       |    |  |
| SERF2    | DZ 1                   |       |       |    |          |    |  |
| 0        | 0.923108937940091      | 0.598 | 0.065 | 0  | 10       |    |  |
| RFC4     | DZ 1                   |       |       |    |          |    |  |
| 0        | 0.914374550281165      | 0.453 | 0.023 | 0  | 10       |    |  |
| CDCA3    | DZ 1                   |       |       |    |          |    |  |
| 0        | 0.913525974663585      | 0.577 | 0.057 | 0  | 10       |    |  |
| SAC3D1   | DZ 1                   |       |       |    |          |    |  |
| 0        | 0.900043313921595      | 0.568 | 0.055 | 0  | 10       |    |  |
| TMEM106C | DZ 1                   |       |       |    |          |    |  |
| 0        | 0.897595916207681      | 1     | 0.999 | 0  | 10       |    |  |
| PTMA     | DZ 1                   |       |       |    |          |    |  |
| 0        | 0.887560447675132      | 0.967 | 0.552 | 0  | 10       |    |  |
| SNRPB    | DZ 1                   |       |       |    |          |    |  |
| 0        | 0.883248140706843      | 0.514 | 0.043 | 0  | 10       |    |  |
| FBX05    | DZ 1                   |       |       |    |          |    |  |
| 0        | 0.87391654042959 0.524 | 0.027 | 0     | 10 | RAD51AP1 | DZ |  |
| 1        |                        |       |       |    |          |    |  |
| 0        | 0.873483178273541      | 0.995 | 0.916 | 0  | 10       |    |  |
| CFL1     | DZ 1                   |       |       |    |          |    |  |
| 0        | 0.850690380191643      | 0.461 | 0.018 | 0  | 10       |    |  |

|        |                       |                   |        |       |       |        |    |
|--------|-----------------------|-------------------|--------|-------|-------|--------|----|
| NDC80  | DZ 1                  |                   |        |       |       |        |    |
| 0      | 0.838039625173266     | 0.397             | 0.017  | 0     | 10    |        |    |
| MXD3   | DZ 1                  |                   |        |       |       |        |    |
| 0      | 0.827577713422341     | 0.497             | 0.04   | 0     | 10    |        |    |
| MCM2   | DZ 1                  |                   |        |       |       |        |    |
| 0      | 0.826406736899547     | 0.455             | 0.016  | 0     | 10    |        |    |
| E2F1   | DZ 1                  |                   |        |       |       |        |    |
| 0      | 0.815068696273201     | 0.484             | 0.024  | 0     | 10    |        |    |
| BRCA1  | DZ 1                  |                   |        |       |       |        |    |
| 0      | 0.794434836149794     | 0.488             | 0.035  | 0     | 10    |        |    |
| RFC3   | DZ 1                  |                   |        |       |       |        |    |
| 0      | 0.780353632050807     | 0.439             | 0.016  | 0     | 10    |        |    |
| NCAPG  | DZ 1                  |                   |        |       |       |        |    |
| 0      | 0.772865494865466     | 0.413             | 0.007  | 0     | 10    |        |    |
| ESC02  | DZ 1                  |                   |        |       |       |        |    |
| 0      | 0.771095600545781     | 0.425             | 0.011  | 0     | 10    |        |    |
| CDCA5  | DZ 1                  |                   |        |       |       |        |    |
| 0      | 0.769015523954284     | 0.423             | 0.006  | 0     | 10    |        |    |
| CDC45  | DZ 1                  |                   |        |       |       |        |    |
| 0      | 0.748366919637934     | 0.407             | 0.011  | 0     | 10    |        |    |
| CDC6   | DZ 1                  |                   |        |       |       |        |    |
| 0      | 0.719957821404014     | 0.434             | 0.021  | 0     | 10    |        |    |
| TCF19  | DZ 1                  |                   |        |       |       |        |    |
| 0      | 0.713627561364093     | 0.421             | 0.022  | 0     | 10    |        |    |
| CDCA2  | DZ 1                  |                   |        |       |       |        |    |
| 0      | 0.692732897651261     | 0.406             | 0.017  | 0     | 10    |        |    |
| CHEK1  | DZ 1                  |                   |        |       |       |        |    |
| 0      | 0.676541576980873     | 0.4               | 0.012  | 0     | 10    |        |    |
| NCAPH  | DZ 1                  |                   |        |       |       |        |    |
| 0      | 0.67206173744696      | 0.367             | 0.004  | 0     | 10    | PKMYT1 | DZ |
| 1      |                       |                   |        |       |       |        |    |
| 0      | 0.652874101125571     | 0.362             | 0.008  | 0     | 10    |        |    |
| MELK   | DZ 1                  |                   |        |       |       |        |    |
| 0      | 0.488655427641103     | 0.282             | 0.005  | 0     | 10    |        |    |
| MCM10  | DZ 1                  |                   |        |       |       |        |    |
| 0      | -1.23438819044572     | 0.993             | 0.998  | 0     | 10    | B2M    |    |
|        | DZ 1                  |                   |        |       |       |        |    |
| 0      | -1.50110452804474     | 0.998             | 1      | 0     | 10    |        |    |
| MALAT1 | DZ 1                  |                   |        |       |       |        |    |
| 0      | -2.29549055568735     | 0.27              | 0.712  | 0     | 10    |        |    |
| EMP3   | DZ 1                  |                   |        |       |       |        |    |
|        | 4.94065645841247e-324 | 0.937547105954559 |        | 0.967 | 0.566 |        |    |
|        | 8.80869639970358e-320 | 10                | LDHB   | DZ 1  |       |        |    |
|        | 1.97626258336499e-323 | 0.412667123052863 |        | 0.24  | 0.003 |        |    |
|        | 3.52347855988143e-319 | 10                | E2F8   | DZ 1  |       |        |    |
|        | 4.57010722403153e-321 | 0.98029152330474  | 0.919  | 0.403 |       |        |    |
|        | 8.14804416972582e-317 | 10                | HNRNPD | DZ 1  |       |        |    |
|        | 1.58911620174331e-317 | 0.844075686140011 |        | 0.558 | 0.056 |        |    |
|        | 2.83323527608814e-313 | 10                | HAUS8  | DZ 1  |       |        |    |
|        | 2.01148304106007e-317 | 1.29081161696867  | 0.749  | 0.128 |       |        |    |

|                       |                   |            |      |       |       |
|-----------------------|-------------------|------------|------|-------|-------|
| 3.586273113906e-313   | 10                | BIK        | DZ 1 |       |       |
| 2.17418132856382e-317 | -2.15548032720698 |            |      | 0.129 | 0.557 |
| 3.87634789069644e-313 | 10                | CCR7       | DZ 1 |       |       |
| 2.2295043292569e-317  | 0.977057380120855 |            |      | 0.825 | 0.244 |
| 3.97498326863212e-313 | 10                | HSPB11     | DZ 1 |       |       |
| 1.50554604516843e-315 | 0.829426294888432 |            |      | 0.989 | 0.841 |
| 2.68423804393079e-311 | 10                | HNRNPA2B1  | DZ 1 |       |       |
| 8.19756446229283e-314 | 0.955298311985457 |            |      | 0.896 | 0.347 |
| 1.46154376798219e-309 | 10                | VPS29      | DZ 1 |       |       |
| 1.76007460983703e-312 | 0.885651319806469 |            |      | 0.476 | 0.03  |
| 3.13803702187844e-308 | 10                | TPX2       | DZ 1 |       |       |
| 1.94053739496987e-312 | 1.1551887075015   | 0.43       |      | 0.036 |       |
| 3.45978412149178e-308 | 10                | HES6       | DZ 1 |       |       |
| 1.60238572344138e-311 | 0.552945952760146 |            |      | 0.27  | 0.007 |
| 2.85689350632363e-307 | 10                | SPC24      | DZ 1 |       |       |
| 2.95131847741282e-309 | 0.984838528281142 |            |      | 0.828 | 0.265 |
| 5.26190571337932e-305 | 10                | PRDX3      | DZ 1 |       |       |
| 3.15246212051211e-309 | 0.952328061989772 |            |      | 0.744 | 0.141 |
| 5.62052471466104e-305 | 10                | TMP0       | DZ 1 |       |       |
| 1.02627015185075e-308 | 0.89900776324106  | 0.529      |      | 0.045 |       |
| 1.8297370537347e-304  | 10                | HMGB3      | DZ 1 |       |       |
| 3.5571961022493e-308  | 0.617573325826994 |            |      | 0.325 | 0.011 |
| 6.34212493070028e-304 | 10                | HJURP      | DZ 1 |       |       |
| 3.71127156540101e-308 | 0.910995292880534 |            |      | 0.566 | 0.067 |
| 6.61682607395346e-304 | 10                | H2AFX      | DZ 1 |       |       |
| 9.97584989676003e-308 | 0.992924546680988 |            |      | 0.648 | 0.093 |
| 1.77859427809335e-303 | 10                | AC023590.1 | DZ 1 |       |       |
| 1.22931256665527e-305 | 1.08963782773441  | 0.78       |      | 0.199 |       |
| 2.19174137508969e-301 | 10                | NANS       | DZ 1 |       |       |
| 1.16241947275464e-302 | 0.896702476173743 |            |      | 0.711 | 0.146 |
| 2.07247767797425e-298 | 10                | SAE1       | DZ 1 |       |       |
| 1.93914685952958e-302 | 0.400120616402317 |            |      | 0.224 | 0.003 |
| 3.45730493585529e-298 | 10                | RAD54L     | DZ 1 |       |       |
| 2.48466238010699e-302 | 0.925385880043915 |            |      | 0.93  | 0.376 |
| 4.42990455749275e-298 | 10                | YWHAE      | DZ 1 |       |       |
| 3.91579263792035e-302 | 0.61169640749047  | 0.358      |      | 0.015 |       |
| 6.98146669414819e-298 | 10                | PAQR4      | DZ 1 |       |       |
| 5.61904607925255e-302 | 1.10449400192854  | 0.894      |      | 0.321 |       |
| 1.00181972546994e-297 | 10                | LRMP       | DZ 1 |       |       |
| 4.48439102570605e-301 | 0.94962221415722  | 0.88       |      | 0.321 |       |
| 7.99522075973131e-297 | 10                | RBBP4      | DZ 1 |       |       |
| 7.0540233817876e-301  | 0.816949175432639 |            |      | 0.369 | 0.02  |
| 1.25766182873891e-296 | 10                | HIST1H1D   | DZ 1 |       |       |
| 3.35047455612503e-300 | 0.84206126746185  | 0.976      |      | 0.635 |       |
| 5.97356108611531e-296 | 10                | SNRPG      | DZ 1 |       |       |
| 1.00877303969064e-299 | 1.01900147152876  | 0.81       |      | 0.244 |       |
| 1.79854145246444e-295 | 10                | ANP32E     | DZ 1 |       |       |
| 1.27673077756007e-299 | 0.689139669279495 |            |      | 0.995 | 0.892 |
| 2.27628330331184e-295 | 10                | PPIA       | DZ 1 |       |       |
| 3.02026271266788e-298 | 0.84618640753361  | 0.568      |      | 0.06  |       |

|                       |                   |          |      |       |       |
|-----------------------|-------------------|----------|------|-------|-------|
| 5.38482639041557e-294 | 10                | LIG1     | DZ 1 |       |       |
| 2.27554357699525e-297 | 0.752710309887968 |          |      | 0.995 | 0.865 |
| 4.05706664342483e-293 | 10                | ARPC2    | DZ 1 |       |       |
| 6.20049594135204e-296 | 0.924438722150073 |          |      | 0.991 | 0.799 |
| 1.10548642138365e-291 | 10                | CALM2    | DZ 1 |       |       |
| 3.06854727561498e-295 | 0.940109789504396 |          |      | 0.819 | 0.235 |
| 5.47091293769395e-291 | 10                | MPC2     | DZ 1 |       |       |
| 8.35259275954701e-295 | 0.960731641319583 |          |      | 0.901 | 0.373 |
| 1.48918376309964e-290 | 10                | BUB3     | DZ 1 |       |       |
| 1.52993919191666e-293 | 0.629436136512582 |          |      | 0.369 | 0.016 |
| 2.72772858526821e-289 | 10                | KIF2C    | DZ 1 |       |       |
| 1.51188299698578e-290 | 0.725201131503017 |          |      | 0.447 | 0.04  |
| 2.69553619532595e-286 | 10                | CDKN2C   | DZ 1 |       |       |
| 3.46577681635651e-290 | 0.907443534432101 |          |      | 0.957 | 0.539 |
| 6.17913348588203e-286 | 10                | TCEA1    | DZ 1 |       |       |
| 6.4551681903741e-288  | 0.965047114677673 |          |      | 0.916 | 0.38  |
| 1.1508919366618e-283  | 10                | NUCKS1   | DZ 1 |       |       |
| 1.38466210422742e-287 | 0.457686425960941 |          |      | 0.275 | 0.007 |
| 2.46871406562708e-283 | 10                | DSCC1    | DZ 1 |       |       |
| 1.44996912233482e-286 | 0.748600783664769 |          |      | 0.469 | 0.037 |
| 2.58514994821075e-282 | 10                | RPL39L   | DZ 1 |       |       |
| 8.16468588297049e-285 | 1.11593353337233  | 0.825    |      | 0.337 |       |
| 1.45568184607481e-280 | 10                | TUBB4B   | DZ 1 |       |       |
| 2.42154966761108e-284 | 0.934767722980407 |          |      | 0.883 | 0.303 |
| 4.3173809023838e-280  | 10                | NAA38    | DZ 1 |       |       |
| 3.3648760120515e-284  | 0.428752817215837 |          |      | 0.253 | 0.006 |
| 5.99923744188661e-280 | 10                | SKA3     | DZ 1 |       |       |
| 3.50124372352396e-283 | 0.980351272610135 |          |      | 0.85  | 0.27  |
| 6.24236743467086e-279 | 10                | DCK      | DZ 1 |       |       |
| 6.65278802025066e-283 | 0.887668377990703 |          |      | 0.956 | 0.521 |
| 1.18612557613049e-278 | 10                | SRSF9    | DZ 1 |       |       |
| 1.14927444903132e-282 | 0.869190063285999 |          |      | 0.983 | 0.74  |
| 2.04904141517794e-278 | 10                | HSP90AA1 | DZ 1 |       |       |
| 1.49541432078208e-280 | 0.709481438220377 |          |      | 0.44  | 0.034 |
| 2.66617419252237e-276 | 10                | CENPN    | DZ 1 |       |       |
| 3.31896783257457e-279 | 0.867392389891552 |          |      | 0.732 | 0.155 |
| 5.9173877486972e-275  | 10                | NUDT1    | DZ 1 |       |       |
| 5.57973806782803e-279 | 0.878244827476597 |          |      | 0.934 | 0.435 |
| 9.9481150011306e-275  | 10                | MRPL51   | DZ 1 |       |       |
| 3.93206578592458e-278 | 0.974582124311611 |          |      | 0.904 | 0.357 |
| 7.01048008972493e-274 | 10                | ACADM    | DZ 1 |       |       |
| 6.06022349752403e-278 | 0.861810921283803 |          |      | 0.631 | 0.106 |
| 1.08047724737356e-273 | 10                | RFC2     | DZ 1 |       |       |
| 1.72723884889819e-277 | 1.05497538153513  | 0.741    |      | 0.172 |       |
| 3.07949414370058e-273 | 10                | DAAM1    | DZ 1 |       |       |
| 8.37407462030716e-277 | 0.815332056539674 |          |      | 0.465 | 0.027 |
| 1.49301376405456e-272 | 10                | NUF2     | DZ 1 |       |       |
| 2.64810063352466e-275 | 0.727502254719434 |          |      | 0.988 | 0.792 |
| 4.72129861951112e-271 | 10                | SUM02    | DZ 1 |       |       |
| 4.37643081685103e-273 | 0.917697549308122 |          |      | 0.583 | 0.075 |

|                       |                   |         |      |       |       |
|-----------------------|-------------------|---------|------|-------|-------|
| 7.80273850336369e-269 | 10                | GCSAM   | DZ 1 |       |       |
| 3.66306146461793e-272 | 0.804779953001551 |         |      | 0.968 | 0.545 |
| 6.53087228526731e-268 | 10                | ATP5PF  | DZ 1 |       |       |
| 4.90918871049135e-272 | 1.03159006644949  | 0.62    |      | 0.102 |       |
| 8.75259255193503e-268 | 10                | UBE2S   | DZ 1 |       |       |
| 3.19839211056285e-271 | 1.04384378064597  | 0.605   |      | 0.104 |       |
| 5.7024132939225e-267  | 10                | LPP     | DZ 1 |       |       |
| 8.88370082067016e-270 | 0.809707775998679 |         |      | 0.533 | 0.052 |
| 1.58387501931728e-265 | 10                | SG01    | DZ 1 |       |       |
| 8.40610324748478e-269 | 0.746097850414093 |         |      | 0.547 | 0.077 |
| 1.49872414799406e-264 | 10                | TUBG1   | DZ 1 |       |       |
| 9.47493429091344e-269 | 0.882319573088761 |         |      | 0.665 | 0.131 |
| 1.68928603472696e-264 | 10                | SMARCA4 | DZ 1 |       |       |
| 1.46086989907996e-268 | 0.536090907738028 |         |      | 0.338 | 0.015 |
| 2.60458494306966e-264 | 10                | DONSON  | DZ 1 |       |       |
| 5.41998214075097e-268 | 0.749493455822259 |         |      | 0.971 | 0.694 |
| 9.66328615874491e-264 | 10                | TPI1    | DZ 1 |       |       |
| 8.34217281087936e-267 | 0.416063722230995 |         |      | 0.238 | 0.004 |
| 1.48732599045168e-262 | 10                | CCNE2   | DZ 1 |       |       |
| 3.67924810384836e-266 | 0.991285917924538 |         |      | 0.551 | 0.038 |
| 6.55973144435124e-262 | 10                | CCNB2   | DZ 1 |       |       |
| 1.60249137688214e-265 | 0.882312114870205 |         |      | 0.776 | 0.238 |
| 2.85708187584316e-261 | 10                | EIF4A3  | DZ 1 |       |       |
| 8.70978473406144e-265 | 0.842549247183394 |         |      | 0.609 | 0.096 |
| 1.55286752023581e-260 | 10                | BRI3BP  | DZ 1 |       |       |
| 1.26318435127754e-263 | 0.816148813508613 |         |      | 0.707 | 0.151 |
| 2.25213137989273e-259 | 10                | YEATS4  | DZ 1 |       |       |
| 3.47492507269296e-263 | 0.783512791313452 |         |      | 0.973 | 0.629 |
| 6.19544391210427e-259 | 10                | ERH     | DZ 1 |       |       |
| 2.20083541916924e-262 | 0.844945897977928 |         |      | 0.703 | 0.141 |
| 3.92386946883683e-258 | 10                | VRK1    | DZ 1 |       |       |
| 1.35059431899822e-260 | 0.770493873708586 |         |      | 0.976 | 0.667 |
| 2.40797461134192e-256 | 10                | HNRNPA3 | DZ 1 |       |       |
| 1.89306754026218e-260 | 0.812723451235657 |         |      | 0.935 | 0.483 |
| 3.37515011753344e-256 | 10                | COX5A   | DZ 1 |       |       |
| 1.28463973664635e-259 | 0.802510699662848 |         |      | 0.967 | 0.572 |
| 2.29038418646677e-255 | 10                | ATP5MC3 | DZ 1 |       |       |
| 2.52469693598417e-259 | 0.773372077433907 |         |      | 0.952 | 0.575 |
| 4.50128216716618e-255 | 10                | HNRNPF  | DZ 1 |       |       |
| 3.59967626230355e-259 | 0.912521298737928 |         |      | 0.92  | 0.38  |
| 6.417862808061e-255   | 10                | BASP1   | DZ 1 |       |       |
| 3.16820099712039e-258 | 0.509184734738567 |         |      | 0.318 | 0.015 |
| 5.64858555776595e-254 | 10                | OIP5    | DZ 1 |       |       |
| 1.69671068289961e-257 | 0.760666944531216 |         |      | 0.977 | 0.677 |
| 3.02506547654172e-253 | 10                | PPP1CA  | DZ 1 |       |       |
| 1.3291974646461e-255  | 0.666513557620679 |         |      | 0.988 | 0.74  |
| 2.36982615971753e-251 | 10                | RAN     | DZ 1 |       |       |
| 1.79530809041003e-254 | 0.821107000652547 |         |      | 0.911 | 0.4   |
| 3.20085479439204e-250 | 10                | DDX39A  | DZ 1 |       |       |
| 9.3562664933198e-253  | 0.588990697633818 |         |      | 0.32  | 0.014 |

|                       |                    |          |      |       |       |
|-----------------------|--------------------|----------|------|-------|-------|
| 1.66812875309399e-248 | 10                 | KIF23    | DZ 1 |       |       |
| 1.04592597667238e-251 | 0.880815427597786  |          |      | 0.856 | 0.332 |
| 1.86478142380919e-247 | 10                 | NASP     | DZ 1 |       |       |
| 1.26363300554366e-251 | 0.904009446817012  |          |      | 0.675 | 0.148 |
| 2.25293128558379e-247 | 10                 | DEF8     | DZ 1 |       |       |
| 1.16871686041249e-250 | 0.816714467269225  |          |      | 0.962 | 0.543 |
| 2.08370529042943e-246 | 10                 | ATP5IF1  | DZ 1 |       |       |
| 1.5251297284804e-250  | 0.630940160872591  |          |      | 0.41  | 0.033 |
| 2.7191537929077e-246  | 10                 | CTNNAL1  | DZ 1 |       |       |
| 2.64132024551219e-250 | 0.976320198331398  |          |      | 0.512 | 0.038 |
| 4.70920986572369e-246 | 10                 | CENPF    | DZ 1 |       |       |
| 7.71051955211342e-249 | 0.899690405430996  |          |      | 0.841 | 0.27  |
| 1.3747085309463e-244  | 10                 | BCAS4    | DZ 1 |       |       |
| 1.7584223600749e-248  | 0.833951507510606  |          |      | 0.852 | 0.313 |
| 3.13509122577754e-244 | 10                 | RALY     | DZ 1 |       |       |
| 7.0575551253516e-248  | 0.903956329169821  |          |      | 0.816 | 0.24  |
| 1.25829150329894e-243 | 10                 | SYNE2    | DZ 1 |       |       |
| 3.47588680078889e-247 | 0.772887924793013  |          |      | 0.925 | 0.418 |
| 6.1971585771265e-243  | 10                 | LSM3     | DZ 1 |       |       |
| 6.51219056993451e-247 | 0.862905890158167  |          |      | 0.748 | 0.197 |
| 1.16105845671362e-242 | 10                 | SNRNP25  | DZ 1 |       |       |
| 4.23824736248265e-246 | 0.687497785429067  |          |      | 0.472 | 0.048 |
| 7.55637122257031e-242 | 10                 | TCTEX1D2 | DZ 1 |       |       |
| 9.07238702131745e-246 | 0.918265405312461  |          |      | 0.875 | 0.313 |
| 1.61751588203069e-241 | 10                 | GRHPR    | DZ 1 |       |       |
| 1.20290438131538e-245 | 0.770426158715018  |          |      | 0.912 | 0.43  |
| 2.1446582214472e-241  | 10                 | PGAM1    | DZ 1 |       |       |
| 5.92511825340564e-245 | 0.541672358352527  |          |      | 0.287 | 0.012 |
| 1.05638933339969e-240 | 10                 | CKAP2L   | DZ 1 |       |       |
| 3.82233542701309e-244 | 0.511416229543728  |          |      | 0.331 | 0.016 |
| 6.81484183282165e-240 | 10                 | POC1A    | DZ 1 |       |       |
| 9.87065190035901e-241 | 0.520591429624494  |          |      | 0.312 | 0.013 |
| 1.75983852731501e-236 | 10                 | C21orf58 | DZ 1 |       |       |
| 2.18592908429829e-239 | 0.34001584713374   | 0.202    |      | 0.004 |       |
| 3.89729296439543e-235 | 10                 | DIAPH3   | DZ 1 |       |       |
| 3.47117655402668e-239 | 0.860005249968707  |          |      | 0.623 | 0.104 |
| 6.18876067817418e-235 | 10                 | VNN2     | DZ 1 |       |       |
| 8.21414344962036e-239 | 1.01073871921702   | 0.86     |      | 0.331 |       |
| 1.46449963563281e-234 | 10                 | S100A10  | DZ 1 |       |       |
| 1.90847915646571e-235 | 0.777332450010987  |          |      | 0.965 | 0.621 |
| 3.40262748806271e-231 | 10                 | GSTP1    | DZ 1 |       |       |
| 3.18936647015459e-234 | -0.817715886470625 |          | 1    |       | 0.999 |
| 5.68632147963861e-230 | 10                 | RPL34    | DZ 1 |       |       |
| 1.3168685747987e-233  | -0.845615829444619 |          | 1    |       | 0.999 |
| 2.3478449820086e-229  | 10                 | RPS29    | DZ 1 |       |       |
| 2.16050661848873e-232 | 0.767804894827357  |          |      | 0.987 | 0.779 |
| 3.85196725010356e-228 | 10                 | ACTG1    | DZ 1 |       |       |
| 3.19567553115326e-232 | 0.790268600113254  |          |      | 0.712 | 0.172 |
| 5.69756990449314e-228 | 10                 | NUDT21   | DZ 1 |       |       |
| 5.95298017106783e-230 | 0.78846814075921   | 0.791    |      | 0.257 |       |

|                       |                    |         |      |       |       |
|-----------------------|--------------------|---------|------|-------|-------|
| 1.06135683469968e-225 | 10                 | SMC3    | DZ 1 |       |       |
| 4.93884360432973e-229 | 0.850709585573225  |         |      | 0.753 | 0.222 |
| 8.80546426215947e-225 | 10                 | ZBTB80S | DZ 1 |       |       |
| 7.89928661961942e-229 | 0.757600365538191  |         |      | 0.838 | 0.302 |
| 1.40836381141195e-224 | 10                 | LSM4    | DZ 1 |       |       |
| 8.81401530506808e-229 | 0.679895635914178  |         |      | 0.488 | 0.059 |
| 1.57145078874059e-224 | 10                 | LRR1    | DZ 1 |       |       |
| 2.21409676237524e-228 | 0.754186735561319  |         |      | 0.928 | 0.432 |
| 3.94751311763882e-224 | 10                 | SEM1    | DZ 1 |       |       |
| 1.23568081967311e-227 | 0.798805571272011  |         |      | 0.527 | 0.085 |
| 2.2030953333952e-223  | 10                 | FAM241A | DZ 1 |       |       |
| 2.84746886345494e-227 | 0.706704321994172  |         |      | 0.956 | 0.582 |
| 5.07675223665381e-223 | 10                 | SRSF2   | DZ 1 |       |       |
| 1.66371687086955e-226 | 0.511296801142776  |         |      | 0.312 | 0.016 |
| 2.96624080907331e-222 | 10                 | FANCI   | DZ 1 |       |       |
| 2.58767158355964e-226 | 0.754230516697052  |         |      | 0.529 | 0.083 |
| 4.61355966632848e-222 | 10                 | PHF19   | DZ 1 |       |       |
| 3.98160776891253e-226 | 0.758937395338018  |         |      | 0.611 | 0.11  |
| 7.09880849119414e-222 | 10                 | COMMD4  | DZ 1 |       |       |
| 5.08212721830242e-226 | 0.730157581201119  |         |      | 0.556 | 0.089 |
| 9.06092461751138e-222 | 10                 | BCL2L12 | DZ 1 |       |       |
| 1.26721003214464e-225 | -0.772099954208237 |         |      | 0.999 | 1     |
| 2.25930876631068e-221 | 10                 | RPS27   | DZ 1 |       |       |
| 2.41062792319757e-224 | 0.758482855264602  |         |      | 0.59  | 0.096 |
| 4.29790852426895e-220 | 10                 | CKLF    | DZ 1 |       |       |
| 4.35318458679819e-223 | 0.621337339030939  |         |      | 0.439 | 0.044 |
| 7.76129279980249e-219 | 10                 | RFC5    | DZ 1 |       |       |
| 6.58833331015809e-221 | 0.340911260714205  |         |      | 0.194 | 0.004 |
| 1.17463394586809e-216 | 10                 | CCNE1   | DZ 1 |       |       |
| 1.40702249593159e-220 | 0.761024733707536  |         |      | 0.934 | 0.469 |
| 2.50858040799644e-216 | 10                 | NDUFB1  | DZ 1 |       |       |
| 3.43805498348435e-220 | 0.805808001031697  |         |      | 0.862 | 0.311 |
| 6.12970823005424e-216 | 10                 | RFTN1   | DZ 1 |       |       |
| 1.2704960317848e-219  | 0.824881535037874  |         |      | 0.829 | 0.256 |
| 2.26516737506912e-215 | 10                 | ITGAE   | DZ 1 |       |       |
| 3.15999994499623e-219 | 0.747052230969879  |         |      | 0.579 | 0.097 |
| 5.63396390193379e-215 | 10                 | WDR34   | DZ 1 |       |       |
| 3.6989879868488e-219  | 0.749833615721052  |         |      | 0.63  | 0.122 |
| 6.59492568175272e-215 | 10                 | RPA1    | DZ 1 |       |       |
| 9.20849294014902e-219 | 0.370347026862504  |         |      | 0.211 | 0.006 |
| 1.64178220629917e-214 | 10                 | SKA1    | DZ 1 |       |       |
| 1.01657179925602e-218 | 0.745911892310052  |         |      | 0.661 | 0.143 |
| 1.81244586089355e-214 | 10                 | TPGS2   | DZ 1 |       |       |
| 2.447748014728e-218   | 0.767851984527155  |         |      | 0.835 | 0.32  |
| 4.36408993545855e-214 | 10                 | PPM1G   | DZ 1 |       |       |
| 5.44565621838682e-218 | 0.617926761887243  |         |      | 0.419 | 0.037 |
| 9.70906047176186e-214 | 10                 | ATAD5   | DZ 1 |       |       |
| 7.99019754276441e-218 | 0.640035616028589  |         |      | 0.394 | 0.033 |
| 1.42457231989947e-213 | 10                 | MYBL1   | DZ 1 |       |       |
| 4.560450069321e-217   | 0.764238354635487  |         |      | 0.642 | 0.141 |



|                       |                   |           |      |       |       |
|-----------------------|-------------------|-----------|------|-------|-------|
| 8.13082642859242e-213 | 10                | SMC1A     | DZ 1 |       |       |
| 4.58976076728727e-217 | 0.770211242282934 |           |      | 0.463 | 0.06  |
| 8.18308447199647e-213 | 10                | S1PR2     | DZ 1 |       |       |
| 3.6814575547945e-216  | 0.748867911705474 |           |      | 0.93  | 0.441 |
| 6.56367067444311e-212 | 10                | COX17     | DZ 1 |       |       |
| 1.21905262674859e-215 | 0.710280303705807 |           |      | 0.974 | 0.684 |
| 2.17344892823006e-211 | 10                | EZR       | DZ 1 |       |       |
| 3.88571702624437e-215 | 0.72865069432026  | 0.695     |      | 0.194 |       |
| 6.92784488609109e-211 | 10                | C19orf48  | DZ 1 |       |       |
| 8.95918210435855e-215 | 0.830832685224501 |           |      | 0.622 | 0.102 |
| 1.59733257738609e-210 | 10                | CD38      | DZ 1 |       |       |
| 9.24043634954158e-215 | 0.706750580236772 |           |      | 0.575 | 0.095 |
| 1.64747739675977e-210 | 10                | CENPH     | DZ 1 |       |       |
| 1.57525670270392e-213 | 0.613343854488954 |           |      | 0.341 | 0.027 |
| 2.80852517525082e-209 | 10                | HIST2H2AC | DZ 1 |       |       |
| 1.8983894269934e-213  | 0.320862556890075 |           |      | 0.197 | 0.005 |
| 3.38463850938653e-209 | 10                | DTL       | DZ 1 |       |       |
| 4.87393937749832e-211 | 0.608393349842419 |           |      | 0.983 | 0.736 |
| 8.68974651614175e-207 | 10                | CHCHD2    | DZ 1 |       |       |
| 1.32164557365234e-210 | -1.25632586602853 |           |      | 0.885 | 0.905 |
| 2.35636189326476e-206 | 10                | HLA-A     | DZ 1 |       |       |
| 1.58228253807366e-210 | 0.755648451458428 |           |      | 0.552 | 0.088 |
| 2.82105153713152e-206 | 10                | SEMA4A    | DZ 1 |       |       |
| 1.43136119108462e-209 | 0.814121526557221 |           |      | 0.872 | 0.365 |
| 2.55197386758476e-205 | 10                | LSM8      | DZ 1 |       |       |
| 3.34091750435983e-209 | 0.77051863023839  | 0.803     |      | 0.256 |       |
| 5.95652181852314e-205 | 10                | POU2AF1   | DZ 1 |       |       |
| 7.88428319618107e-209 | 0.819454332527529 |           |      | 0.959 | 0.593 |
| 1.40568885104712e-204 | 10                | DYNLL1    | DZ 1 |       |       |
| 2.82771910952781e-208 | 0.879694224109305 |           |      | 0.705 | 0.15  |
| 5.04154040037714e-204 | 10                | CCDC88A   | DZ 1 |       |       |
| 4.31809899515973e-208 | 0.677289885550367 |           |      | 0.376 | 0.042 |
| 7.69873869847028e-204 | 10                | UNG       | DZ 1 |       |       |
| 1.20802074049076e-206 | 0.781574386856708 |           |      | 0.54  | 0.074 |
| 2.15378017822097e-202 | 10                | FAM111A   | DZ 1 |       |       |
| 3.96855401512084e-206 | 0.72967459875871  | 0.661     |      | 0.161 |       |
| 7.07553495355894e-202 | 10                | PMVK      | DZ 1 |       |       |
| 1.07543992765033e-205 | 0.389099905495607 |           |      | 0.248 | 0.009 |
| 1.91740184700777e-201 | 10                | TEDC2     | DZ 1 |       |       |
| 2.29086050506554e-205 | 0.492831935753145 |           |      | 0.33  | 0.025 |
| 4.08437519448135e-201 | 10                | ACOT7     | DZ 1 |       |       |
| 1.27992672982201e-204 | 0.678646598717617 |           |      | 0.512 | 0.077 |
| 2.28198136659966e-200 | 10                | MSH6      | DZ 1 |       |       |
| 1.95278952712379e-203 | 0.794306533104321 |           |      | 0.528 | 0.082 |
| 3.481628447909e-199   | 10                | STAG3     | DZ 1 |       |       |
| 4.02125965783372e-203 | 0.734301549012725 |           |      | 0.855 | 0.363 |
| 7.16950384395175e-199 | 10                | ANAPC11   | DZ 1 |       |       |
| 1.26677776732262e-202 | 0.630831040034381 |           |      | 0.98  | 0.698 |
| 2.2585380813595e-198  | 10                | NDUFA4    | DZ 1 |       |       |
| 2.12754069712445e-201 | 0.670010316560243 |           |      | 0.557 | 0.096 |

|                       |                    |         |      |       |       |
|-----------------------|--------------------|---------|------|-------|-------|
| 3.79319230890319e-197 | 10                 | RAD51C  | DZ 1 |       |       |
| 1.00516259178879e-200 | 0.734390642208932  |         |      | 0.824 | 0.307 |
| 1.79210438490023e-196 | 10                 | IMP4    | DZ 1 |       |       |
| 1.85386109227615e-200 | 0.715066248165806  |         |      | 0.894 | 0.424 |
| 3.30524894141916e-196 | 10                 | FDPS    | DZ 1 |       |       |
| 2.50689999910353e-200 | 0.752838154552062  |         |      | 0.691 | 0.173 |
| 4.46955200840168e-196 | 10                 | RFC1    | DZ 1 |       |       |
| 4.24360470136875e-200 | 0.614688117792473  |         |      | 0.379 | 0.039 |
| 7.56592282207034e-196 | 10                 | UCHL1   | DZ 1 |       |       |
| 7.80514228436215e-200 | 0.720012113015984  |         |      | 0.749 | 0.231 |
| 1.39157881787893e-195 | 10                 | HAT1    | DZ 1 |       |       |
| 2.90159066773577e-199 | 0.627950020055931  |         |      | 0.455 | 0.06  |
| 5.17324600150611e-195 | 10                 | HIRIP3  | DZ 1 |       |       |
| 4.59525315868342e-199 | 0.702861296348355  |         |      | 0.856 | 0.329 |
| 8.19287685661667e-195 | 10                 | LSM6    | DZ 1 |       |       |
| 1.96527868589034e-198 | 0.455904266408393  |         |      | 0.268 | 0.014 |
| 3.50389536907388e-194 | 10                 | KIF11   | DZ 1 |       |       |
| 4.79540268765127e-198 | 0.74039384971693   | 0.535   |      | 0.097 |       |
| 8.54972345181344e-194 | 10                 | CRIP1   | DZ 1 |       |       |
| 1.85560515612607e-197 | 0.6883630524605    | 0.934   |      | 0.516 |       |
| 3.30835843285716e-193 | 10                 | SRSF7   | DZ 1 |       |       |
| 3.21654844538544e-197 | 0.716198911745168  |         |      | 0.876 | 0.367 |
| 5.73478422327771e-193 | 10                 | SMARCB1 | DZ 1 |       |       |
| 3.32153423988866e-196 | 0.523684075319235  |         |      | 0.313 | 0.021 |
| 5.92196339629749e-192 | 10                 | PRC1    | DZ 1 |       |       |
| 5.1512539037836e-196  | 0.710259053020333  |         |      | 0.619 | 0.138 |
| 9.18417058505578e-192 | 10                 | PRKDC   | DZ 1 |       |       |
| 1.31443492937755e-195 | 0.568704092998583  |         |      | 0.409 | 0.041 |
| 2.34350603558723e-191 | 10                 | GGH     | DZ 1 |       |       |
| 1.75029231156148e-195 | 0.756050621301147  |         |      | 0.746 | 0.209 |
| 3.12059616228296e-191 | 10                 | UBE2G1  | DZ 1 |       |       |
| 2.37657431296781e-195 | 0.662426446531625  |         |      | 0.961 | 0.642 |
| 4.23719434259031e-191 | 10                 | YWHAB   | DZ 1 |       |       |
| 1.77652666548129e-194 | 0.631360715210238  |         |      | 0.468 | 0.057 |
| 3.16736939188658e-190 | 10                 | CCDC34  | DZ 1 |       |       |
| 1.90001109240103e-194 | -0.898654443086012 |         |      | 0.981 | 0.986 |
| 3.3875297766418e-190  | 10                 | HLA-B   | DZ 1 |       |       |
| 3.07741875817059e-194 | 0.602035788093733  |         |      | 0.976 | 0.67  |
| 5.48672990394234e-190 | 10                 | SRSF3   | DZ 1 |       |       |
| 5.71479031113108e-194 | 0.65084837070993   | 0.892   |      | 0.43  |       |
| 1.01888996457156e-189 | 10                 | YWHAQ   | DZ 1 |       |       |
| 5.9124437433763e-194  | 0.402666279416883  |         |      | 0.23  | 0.009 |
| 1.05412959500656e-189 | 10                 | KIF15   | DZ 1 |       |       |
| 6.6638911146519e-194  | 0.629794601385062  |         |      | 0.474 | 0.055 |
| 1.18810514683129e-189 | 10                 | PRIM1   | DZ 1 |       |       |
| 5.31485084338888e-193 | 0.744898611941574  |         |      | 0.766 | 0.239 |
| 9.47584756867803e-189 | 10                 | RAD21   | DZ 1 |       |       |
| 1.26386621413911e-192 | 0.823624952645064  |         |      | 0.736 | 0.226 |
| 2.25334707318862e-188 | 10                 | KPNA2   | DZ 1 |       |       |
| 4.21913907370235e-192 | 0.69145414305741   | 0.904   |      | 0.419 |       |

|                       |                   |          |      |       |       |
|-----------------------|-------------------|----------|------|-------|-------|
| 7.52230305450392e-188 | 10                | ROM01    | DZ 1 |       |       |
| 6.08319294815553e-192 | 0.668202735775972 |          |      | 0.783 | 0.277 |
| 1.08457247072665e-187 | 10                | SSRP1    | DZ 1 |       |       |
| 7.54210745299402e-190 | 0.739101212254198 |          |      | 0.702 | 0.173 |
| 1.3446823377943e-185  | 10                | LBR      | DZ 1 |       |       |
| 5.6025616296368e-189  | 0.712233059849681 |          |      | 0.577 | 0.106 |
| 9.98880712947945e-185 | 10                | SSBP2    | DZ 1 |       |       |
| 4.14221474201636e-188 | 0.694129119616948 |          |      | 0.878 | 0.399 |
| 7.38515466354098e-184 | 10                | HDAC1    | DZ 1 |       |       |
| 5.66525453853472e-188 | 0.648104974188168 |          |      | 0.433 | 0.05  |
| 1.01005823167535e-183 | 10                | FANCA    | DZ 1 |       |       |
| 1.14109760764664e-187 | 0.586334114859547 |          |      | 0.37  | 0.028 |
| 2.0344629246732e-183  | 10                | CDCA8    | DZ 1 |       |       |
| 1.92675358988302e-187 | 0.708003803081628 |          |      | 0.778 | 0.254 |
| 3.43520897540243e-183 | 10                | SMS      | DZ 1 |       |       |
| 3.96484738842693e-187 | 0.664264517064705 |          |      | 0.446 | 0.056 |
| 7.06892640882637e-183 | 10                | SNTA1    | DZ 1 |       |       |
| 1.99673772425691e-186 | 0.779522431536954 |          |      | 0.765 | 0.265 |
| 3.55998368857764e-182 | 10                | JPT1     | DZ 1 |       |       |
| 5.73973159536094e-186 | 0.629457470046082 |          |      | 0.942 | 0.501 |
| 1.0233367461369e-181  | 10                | SRP9     | DZ 1 |       |       |
| 5.0212880232033e-184  | 0.453535871961538 |          |      | 0.271 | 0.015 |
| 8.95245441656917e-180 | 10                | SPAG5    | DZ 1 |       |       |
| 2.28643605112373e-183 | 0.66884289827182  | 0.862    |      | 0.366 |       |
| 4.0764868355485e-179  | 10                | SRSF10   | DZ 1 |       |       |
| 2.31894197763777e-183 | 0.435583824329315 |          |      | 0.268 | 0.014 |
| 4.13444165193038e-179 | 10                | NCAPG2   | DZ 1 |       |       |
| 8.31970454444872e-183 | 0.806028053936115 |          |      | 0.72  | 0.194 |
| 1.48332012322976e-178 | 10                | FAM111B  | DZ 1 |       |       |
| 7.29368693479782e-182 | 0.720475000332134 |          |      | 0.82  | 0.286 |
| 1.3003914436051e-177  | 10                | CD27     | DZ 1 |       |       |
| 3.93336287019295e-181 | 0.671944717067222 |          |      | 0.79  | 0.296 |
| 7.012792661267e-177   | 10                | MZT2A    | DZ 1 |       |       |
| 5.74248257725352e-181 | 0.693223876935539 |          |      | 0.824 | 0.306 |
| 1.02382721869853e-176 | 10                | RNASEH2C | DZ 1 |       |       |
| 6.20752258880822e-181 | 0.685993841447744 |          |      | 0.85  | 0.33  |
| 1.10673920235862e-176 | 10                | RBM17    | DZ 1 |       |       |
| 1.01399113125156e-179 | 0.611184928714196 |          |      | 0.505 | 0.081 |
| 1.80784478790841e-175 | 10                | TEX30    | DZ 1 |       |       |
| 1.13098619608822e-179 | 0.617556523535566 |          |      | 0.954 | 0.625 |
| 2.01643528900569e-175 | 10                | UQCRH    | DZ 1 |       |       |
| 1.75427399400176e-179 | 0.754288190378739 |          |      | 0.665 | 0.164 |
| 3.12769510390573e-175 | 10                | LCK      | DZ 1 |       |       |
| 4.96389452924179e-179 | 0.57259170020297  | 0.432    |      | 0.054 |       |
| 8.8501275561852e-175  | 10                | DSN1     | DZ 1 |       |       |
| 1.57268803143654e-178 | -1.45718469094427 |          |      | 0.369 | 0.583 |
| 2.80394549124821e-174 | 10                | SARAF    | DZ 1 |       |       |
| 1.14920988477018e-177 | 0.754170080353612 |          |      | 0.528 | 0.08  |
| 2.04892630355676e-173 | 10                | WDR66    | DZ 1 |       |       |
| 1.15248949890806e-177 | 0.444564334761293 |          |      | 0.27  | 0.016 |

|                       |                   |         |      |       |       |
|-----------------------|-------------------|---------|------|-------|-------|
| 2.05477352760318e-173 | 10                | CEP55   | DZ 1 |       |       |
| 5.21222859853503e-177 | 0.587689377600927 |         |      | 0.959 | 0.596 |
| 9.2928823683281e-173  | 10                | POLR2L  | DZ 1 |       |       |
| 9.30477475562986e-177 | 0.551478183286898 |         |      | 0.98  | 0.754 |
| 1.65894829118125e-172 | 10                | PKM     | DZ 1 |       |       |
| 7.09372473161527e-176 | 0.747688489584313 |         |      | 0.843 | 0.285 |
| 1.26474018239969e-171 | 10                | BCL7A   | DZ 1 |       |       |
| 1.43916521051278e-175 | 0.577726459293062 |         |      | 0.955 | 0.614 |
| 2.56588765382324e-171 | 10                | HNRNPA0 | DZ 1 |       |       |
| 3.50405096446776e-175 | 0.579609438066603 |         |      | 0.967 | 0.629 |
| 6.24737246454957e-171 | 10                | ATP5MF  | DZ 1 |       |       |
| 1.04585088260292e-174 | 0.76541405171064  | 0.51    |      | 0.07  |       |
| 1.86464753859275e-170 | 10                | AICDA   | DZ 1 |       |       |
| 1.94342330449164e-174 | 0.719577965154205 |         |      | 0.66  | 0.172 |
| 3.46492940957814e-170 | 10                | PRPSAP2 | DZ 1 |       |       |
| 1.0626974285999e-173  | 0.396965208521729 |         |      | 0.237 | 0.013 |
| 1.89468324545076e-169 | 10                | BUB1B   | DZ 1 |       |       |
| 1.46015550467586e-173 | 0.626831250122137 |         |      | 0.452 | 0.066 |
| 2.6033112492866e-169  | 10                | WEE1    | DZ 1 |       |       |
| 3.40989555367231e-173 | 0.324318235301237 |         |      | 0.191 | 0.007 |
| 6.07950278264236e-169 | 10                | FOXM1   | DZ 1 |       |       |
| 7.11070859822035e-173 | 0.495731062943479 |         |      | 0.321 | 0.025 |
| 1.26776823597671e-168 | 10                | CIP2A   | DZ 1 |       |       |
| 1.47932719233917e-172 | 0.69348912424238  | 0.836   |      | 0.296 |       |
| 2.6374924512215e-168  | 10                | HMG3    | DZ 1 |       |       |
| 1.67314921132585e-171 | 0.675940575756579 |         |      | 0.867 | 0.358 |
| 2.98305772887286e-167 | 10                | PTP4A2  | DZ 1 |       |       |
| 1.27961257908759e-170 | 0.643728668139174 |         |      | 0.71  | 0.199 |
| 2.28142126725526e-166 | 10                | HAUS1   | DZ 1 |       |       |
| 5.04990016332279e-170 | 0.746944733442339 |         |      | 0.777 | 0.273 |
| 9.0034670011882e-166  | 10                | TUBA4A  | DZ 1 |       |       |
| 1.07492996430243e-169 | 0.521312507796897 |         |      | 0.372 | 0.038 |
| 1.9164926333548e-165  | 10                | POLA2   | DZ 1 |       |       |
| 1.3333999865858e-169  | 0.712387686598993 |         |      | 0.551 | 0.126 |
| 2.37731883608381e-165 | 10                | AIM2    | DZ 1 |       |       |
| 1.3402121207768e-169  | 0.63702944090185  | 0.494   |      | 0.082 |       |
| 2.38946419013295e-165 | 10                | FAM76B  | DZ 1 |       |       |
| 6.93760750601213e-169 | 0.658706266299127 |         |      | 0.708 | 0.219 |
| 1.2369060422469e-164  | 10                | PIN1    | DZ 1 |       |       |
| 2.8654950820205e-168  | 0.928212134088255 |         |      | 0.507 | 0.096 |
| 5.10889118173436e-164 | 10                | VPREB3  | DZ 1 |       |       |
| 2.89405353953371e-167 | 0.760436530476432 |         |      | 0.528 | 0.102 |
| 5.15980805563465e-163 | 10                | GMDS    | DZ 1 |       |       |
| 3.73464594013486e-167 | 0.722133007175177 |         |      | 0.643 | 0.152 |
| 6.65850024666645e-163 | 10                | SEL1L3  | DZ 1 |       |       |
| 4.06887003207833e-167 | 0.676899408804298 |         |      | 0.818 | 0.28  |
| 7.25438838019245e-163 | 10                | GGA2    | DZ 1 |       |       |
| 1.68788543775907e-166 | 0.561027982921301 |         |      | 0.978 | 0.714 |
| 3.00933094698064e-162 | 10                | COX6C   | DZ 1 |       |       |
| 2.53666856322947e-166 | 0.641978814925633 |         |      | 0.755 | 0.223 |

|                       |                    |           |      |       |       |
|-----------------------|--------------------|-----------|------|-------|-------|
| 4.52262638138182e-162 | 10                 | MCUB      | DZ 1 |       |       |
| 6.92906066075297e-166 | 0.583668773187704  |           |      | 0.377 | 0.038 |
| 1.23538222520565e-161 | 10                 | LINC01991 | DZ 1 |       |       |
| 8.45166256232661e-165 | 0.623241655111159  |           |      | 0.6   | 0.132 |
| 1.50684691823721e-160 | 10                 | ARL6IP6   | DZ 1 |       |       |
| 3.49134618224691e-164 | 0.625913696592926  |           |      | 0.663 | 0.182 |
| 6.22472110832802e-160 | 10                 | ETFB      | DZ 1 |       |       |
| 9.51213099736664e-164 | 0.361422652649462  |           |      | 0.201 | 0.009 |
| 1.6959178355205e-159  | 10                 | PLK4      | DZ 1 |       |       |
| 1.08031386832038e-163 | 0.673995747121862  |           |      | 0.611 | 0.131 |
| 1.9260915958284e-159  | 10                 | SH2B2     | DZ 1 |       |       |
| 1.11077926360344e-163 | 0.552727247412275  |           |      | 0.97  | 0.675 |
| 1.98040834907858e-159 | 10                 | COX6A1    | DZ 1 |       |       |
| 3.4708226820667e-163  | 0.626819315986232  |           |      | 0.825 | 0.342 |
| 6.18812975985673e-159 | 10                 | GNAS      | DZ 1 |       |       |
| 6.59351645723607e-163 | 0.610581882905289  |           |      | 0.9   | 0.444 |
| 1.17555804916062e-158 | 10                 | RAP1B     | DZ 1 |       |       |
| 1.21595144870206e-162 | 0.61339334781081   | 0.724     |      | 0.217 |       |
| 2.1679198378909e-158  | 10                 | MRPL27    | DZ 1 |       |       |
| 1.83036330975016e-162 | -0.868050034676581 |           |      | 0.816 | 0.909 |
| 3.26335474495356e-158 | 10                 | IGHM      | DZ 1 |       |       |
| 3.20788467680397e-162 | 0.607437314184777  |           |      | 0.96  | 0.626 |
| 5.71933759027379e-158 | 10                 | SET       | DZ 1 |       |       |
| 5.51953237068864e-162 | 0.619099129552311  |           |      | 0.829 | 0.335 |
| 9.84077426370078e-158 | 10                 | MRPS6     | DZ 1 |       |       |
| 2.84933672625807e-161 | 0.605522985475438  |           |      | 0.556 | 0.112 |
| 5.08008244924552e-157 | 10                 | SUZ12     | DZ 1 |       |       |
| 3.14388871153901e-160 | 0.625828689761291  |           |      | 0.718 | 0.226 |
| 5.6052391838029e-156  | 10                 | CEP57     | DZ 1 |       |       |
| 3.36914869215712e-160 | 0.527155442819417  |           |      | 0.969 | 0.647 |
| 6.00685520324693e-156 | 10                 | RBX1      | DZ 1 |       |       |
| 1.0826241594568e-159  | 0.596810801327376  |           |      | 0.325 | 0.023 |
| 1.93021061389552e-155 | 10                 | CENPA     | DZ 1 |       |       |
| 1.31042509186905e-159 | 0.516242172950009  |           |      | 0.356 | 0.035 |
| 2.33635689629333e-155 | 10                 | NSD2      | DZ 1 |       |       |
| 1.16413803841496e-158 | 0.573011263392317  |           |      | 0.436 | 0.066 |
| 2.07554170869004e-154 | 10                 | BTG3      | DZ 1 |       |       |
| 1.37632114978095e-158 | 0.797248290430322  |           |      | 0.435 | 0.066 |
| 2.45384297794446e-154 | 10                 | SUGCT     | DZ 1 |       |       |
| 1.91389373962743e-158 | 0.574909846964057  |           |      | 0.95  | 0.611 |
| 3.41228114838174e-154 | 10                 | ARPC1B    | DZ 1 |       |       |
| 2.03757880729465e-158 | 0.538533782919937  |           |      | 0.373 | 0.043 |
| 3.63279925552562e-154 | 10                 | A4GALT    | DZ 1 |       |       |
| 2.67428481070366e-158 | 0.536756749985713  |           |      | 0.423 | 0.049 |
| 4.76798238900356e-154 | 10                 | BARD1     | DZ 1 |       |       |
| 4.51432057249396e-158 | 0.552285342547719  |           |      | 0.96  | 0.634 |
| 8.04858214869949e-154 | 10                 | HNRNPC    | DZ 1 |       |       |
| 1.96658594882635e-157 | 0.559626093475084  |           |      | 0.954 | 0.596 |
| 3.5062260881625e-153  | 10                 | POMP      | DZ 1 |       |       |
| 4.18349497808233e-157 | 0.703678639252092  |           |      | 0.53  | 0.078 |

|                       |                    |          |      |       |       |
|-----------------------|--------------------|----------|------|-------|-------|
| 7.45875319642299e-153 | 10                 | CCNB1    | DZ 1 |       |       |
| 4.87115186557568e-157 | 0.555723816228926  |          |      | 0.944 | 0.553 |
| 8.68477666113488e-153 | 10                 | RAC1     | DZ 1 |       |       |
| 6.94968265466962e-157 | -1.4400154369216   | 0.322    |      | 0.518 |       |
| 1.23905892050105e-152 | 10                 | BANK1    | DZ 1 |       |       |
| 5.35476056860393e-156 | 0.510602309313876  |          |      | 0.296 | 0.034 |
| 9.54700261776395e-152 | 10                 | ACY3     | DZ 1 |       |       |
| 8.03213164421705e-156 | 0.643435580829119  |          |      | 0.522 | 0.098 |
| 1.43204875084746e-151 | 10                 | CKAP2    | DZ 1 |       |       |
| 9.10440804483782e-156 | 0.628792388399734  |          |      | 0.834 | 0.34  |
| 1.62322491031413e-151 | 10                 | RAB11A   | DZ 1 |       |       |
| 8.75266734878284e-155 | 0.582011902260046  |          |      | 0.879 | 0.42  |
| 1.56051306161449e-150 | 10                 | KHDRBS1  | DZ 1 |       |       |
| 1.32074058411804e-154 | 0.418324154009552  |          |      | 0.29  | 0.023 |
| 2.35474838742406e-150 | 10                 | C9orf40  | DZ 1 |       |       |
| 1.5458875963617e-154  | 0.437827136590788  |          |      | 0.289 | 0.019 |
| 2.75616299555328e-150 | 10                 | FANCB    | DZ 1 |       |       |
| 2.15549549159765e-154 | -0.657554599998247 |          |      | 0.999 | 0.999 |
| 3.84303291196946e-150 | 10                 | RPL13    | DZ 1 |       |       |
| 4.14397517130219e-154 | 0.663798616246549  |          |      | 0.586 | 0.132 |
| 7.38829333291468e-150 | 10                 | SEC14L1  | DZ 1 |       |       |
| 1.42359086030727e-153 | 0.558947513307354  |          |      | 0.335 | 0.023 |
| 2.53812014484184e-149 | 10                 | ASPM     | DZ 1 |       |       |
| 1.012949870797e-152   | 0.629221451947111  |          |      | 0.711 | 0.216 |
| 1.80598832464397e-148 | 10                 | MTF2     | DZ 1 |       |       |
| 3.38705219270332e-152 | -0.589742092740315 |          |      | 1     | 0.999 |
| 6.03877535437074e-148 | 10                 | RPL13A   | DZ 1 |       |       |
| 8.89264454884136e-152 | 0.580015043050137  |          |      | 0.826 | 0.352 |
| 1.58546959661293e-147 | 10                 | CACYBP   | DZ 1 |       |       |
| 1.99701485824667e-151 | 0.557802766619467  |          |      | 0.375 | 0.045 |
| 3.56047779076798e-147 | 10                 | MME      | DZ 1 |       |       |
| 3.28083157277351e-151 | 0.593291273244261  |          |      | 0.566 | 0.13  |
| 5.84939461109788e-147 | 10                 | MAD2L2   | DZ 1 |       |       |
| 2.47340762695883e-150 | 0.584184662731372  |          |      | 0.833 | 0.359 |
| 4.40983845810491e-146 | 10                 | LCP1     | DZ 1 |       |       |
| 3.06419441160365e-150 | 0.583939328267054  |          |      | 0.628 | 0.169 |
| 5.46315221644816e-146 | 10                 | BAZ1B    | DZ 1 |       |       |
| 8.30319518157814e-150 | 0.481371311762169  |          |      | 0.374 | 0.046 |
| 1.48037666892357e-145 | 10                 | SHMT1    | DZ 1 |       |       |
| 9.26618834302024e-150 | 0.540094744915137  |          |      | 0.961 | 0.623 |
| 1.65206871967708e-145 | 10                 | PSMA4    | DZ 1 |       |       |
| 1.29588384742255e-149 | -1.31385585132919  |          |      | 0.104 | 0.359 |
| 2.31043131156966e-145 | 10                 | LY6E     | DZ 1 |       |       |
| 1.31517770783215e-149 | 0.607077962857787  |          |      | 0.341 | 0.046 |
| 2.34483033529394e-145 | 10                 | TUBB2A   | DZ 1 |       |       |
| 2.45142522507924e-149 | 0.595438822736863  |          |      | 0.63  | 0.161 |
| 4.37064603379377e-145 | 10                 | POLR3K   | DZ 1 |       |       |
| 2.55363854555372e-149 | 0.680200404500364  |          |      | 0.449 | 0.073 |
| 4.55288216286773e-145 | 10                 | HIST1H1C | DZ 1 |       |       |
| 2.56520815070455e-149 | 0.62003165311961   | 0.503    |      | 0.104 |       |

|                       |                    |            |      |       |       |
|-----------------------|--------------------|------------|------|-------|-------|
| 4.57350961189114e-145 | 10                 | ABI3       | DZ 1 |       |       |
| 5.35139948875113e-149 | 0.359177198865747  |            |      | 0.22  | 0.013 |
| 9.54101014849439e-145 | 10                 | ASRGL1     | DZ 1 |       |       |
| 9.66182708418995e-149 | 0.5752101111039428 |            |      | 0.871 | 0.401 |
| 1.72260715084023e-144 | 10                 | PPP1CC     | DZ 1 |       |       |
| 1.13571367396934e-148 | 0.335140025966613  |            |      | 0.196 | 0.009 |
| 2.02486390931993e-144 | 10                 | CNTLN      | DZ 1 |       |       |
| 1.27444950056851e-148 | 0.32043926227703   | 0.207      |      | 0.012 |       |
| 2.2722160145636e-144  | 10                 | TRIP13     | DZ 1 |       |       |
| 2.44211741014455e-148 | 0.472626522846588  |            |      | 0.328 | 0.034 |
| 4.35405113054673e-144 | 10                 | AL441992.1 | DZ 1 |       |       |
| 3.20149518850686e-148 | 0.595823064289724  |            |      | 0.875 | 0.452 |
| 5.70794577158888e-144 | 10                 | PRDX6      | DZ 1 |       |       |
| 3.76375985782057e-148 | 0.550103254661317  |            |      | 0.827 | 0.359 |
| 6.71040745050829e-144 | 10                 | PSMC3      | DZ 1 |       |       |
| 1.47823286680351e-147 | 0.48004959657312   | 0.301      |      | 0.03  |       |
| 2.63554137822397e-143 | 10                 | RACGAP1    | DZ 1 |       |       |
| 1.80739769642607e-147 | 0.60604879897239   | 0.78       |      | 0.287 |       |
| 3.22240935295804e-143 | 10                 | UGP2       | DZ 1 |       |       |
| 2.99356401684781e-147 | 0.577183989891664  |            |      | 0.502 | 0.095 |
| 5.33722528563796e-143 | 10                 | OGG1       | DZ 1 |       |       |
| 3.25262241376937e-147 | -1.27667465550262  |            |      | 0.136 | 0.391 |
| 5.79910050150942e-143 | 10                 | CD44       | DZ 1 |       |       |
| 3.28121483836482e-147 | 0.685924489912385  |            |      | 0.405 | 0.065 |
| 5.85007793532064e-143 | 10                 | RGCC       | DZ 1 |       |       |
| 9.25743118569144e-147 | -1.38553332126516  |            |      | 0.113 | 0.361 |
| 1.65050740609693e-142 | 10                 | TXNIP      | DZ 1 |       |       |
| 1.13693844413436e-146 | 0.613543494710298  |            |      | 0.726 | 0.233 |
| 2.02704755204716e-142 | 10                 | SH3KBP1    | DZ 1 |       |       |
| 1.14795971214229e-146 | 0.68082345237706   | 0.415      |      | 0.063 |       |
| 2.04669737077848e-142 | 10                 | H1FX       | DZ 1 |       |       |
| 2.51425499548299e-146 | 0.570896499143027  |            |      | 0.71  | 0.234 |
| 4.48266523144662e-142 | 10                 | SUPT16H    | DZ 1 |       |       |
| 4.71305072761641e-146 | 0.478472079143705  |            |      | 0.991 | 0.899 |
| 8.4028981422673e-142  | 10                 | MYL6       | DZ 1 |       |       |
| 8.58640694837669e-146 | 0.567489657236292  |            |      | 0.854 | 0.396 |
| 1.53087049482608e-141 | 10                 | MDH1       | DZ 1 |       |       |
| 1.00836677212277e-144 | 0.56445640447214   | 0.606      |      | 0.158 |       |
| 1.79781711801768e-140 | 10                 | MRPL37     | DZ 1 |       |       |
| 1.26219127776127e-144 | 0.602476409901841  |            |      | 0.635 | 0.167 |
| 2.25036082912056e-140 | 10                 | RASGRP3    | DZ 1 |       |       |
| 2.34569002000481e-144 | 0.556173492718501  |            |      | 0.406 | 0.059 |
| 4.18213073666658e-140 | 10                 | RPRD1B     | DZ 1 |       |       |
| 2.85914552452306e-144 | 0.486330626003991  |            |      | 0.988 | 0.865 |
| 5.09757055567217e-140 | 10                 | ARPC3      | DZ 1 |       |       |
| 4.37851098721891e-144 | 0.546870139793733  |            |      | 0.946 | 0.587 |
| 7.8064472391126e-140  | 10                 | PRDX1      | DZ 1 |       |       |
| 4.3858097499237e-144  | 0.471843014780583  |            |      | 0.335 | 0.037 |
| 7.81946020313897e-140 | 10                 | RBBP8      | DZ 1 |       |       |
| 4.80663222516343e-144 | 0.531089696852124  |            |      | 0.868 | 0.41  |

|                       |                    |               |       |       |
|-----------------------|--------------------|---------------|-------|-------|
| 8.56974459424388e-140 | 10                 | BLOC1S1 DZ 1  |       |       |
| 6.46834888042855e-144 | 0.489564124591005  |               | 0.271 | 0.019 |
| 1.15324192189161e-139 | 10                 | DLGAP5 DZ 1   |       |       |
| 6.71238339786131e-144 | -1.89030061587415  |               | 0.249 | 0.472 |
| 1.19675083600469e-139 | 10                 | S100A6 DZ 1   |       |       |
| 7.04410872736382e-144 | 0.460434280386362  |               | 0.31  | 0.027 |
| 1.2558941450017e-139  | 10                 | KNL1 DZ 1     |       |       |
| 1.08967641876069e-143 | 0.534112727558473  |               | 0.409 | 0.07  |
| 1.94278408700844e-139 | 10                 | GPR160 DZ 1   |       |       |
| 2.00299064393107e-143 | 0.492446588096528  |               | 0.922 | 0.501 |
| 3.57113201906471e-139 | 10                 | UBE2I DZ 1    |       |       |
| 6.21775929168932e-143 | 0.534375578615544  |               | 0.484 | 0.082 |
| 1.10856430411529e-138 | 10                 | MSH2 DZ 1     |       |       |
| 2.81062695266874e-142 | 0.303114097169455  |               | 0.193 | 0.009 |
| 5.01106679391309e-138 | 10                 | MTFR2 DZ 1    |       |       |
| 3.10240566598891e-142 | 0.527456518317845  |               | 0.898 | 0.454 |
| 5.53127906189163e-138 | 10                 | SNRPF DZ 1    |       |       |
| 4.29520795811178e-142 | 0.544404846552376  |               | 0.856 | 0.385 |
| 7.65792626851748e-138 | 10                 | ENY2 DZ 1     |       |       |
| 1.09560279618898e-141 | 0.458505908798324  |               | 0.358 | 0.042 |
| 1.95335022532533e-137 | 10                 | ZWILCH DZ 1   |       |       |
| 1.13636641906926e-141 | 0.55428642038096   | 0.868         | 0.416 |       |
| 2.02602768855859e-137 | 10                 | CLTA DZ 1     |       |       |
| 2.06383388060318e-141 | 0.534392156728694  |               | 0.896 | 0.431 |
| 3.67960942572742e-137 | 10                 | ATP5F1C DZ 1  |       |       |
| 3.85290961023729e-141 | 0.59000506546675   | 0.528         | 0.11  |       |
| 6.86935254409206e-137 | 10                 | SPATS2 DZ 1   |       |       |
| 4.67286235607815e-141 | 0.545290666187799  |               | 0.845 | 0.39  |
| 8.33124629465174e-137 | 10                 | PSMB2 DZ 1    |       |       |
| 7.06339174576961e-141 | -0.819616532218175 |               | 0.995 | 0.996 |
| 1.25933211435326e-136 | 10                 | RPS12 DZ 1    |       |       |
| 1.17853264540748e-140 | 0.350023041633369  |               | 0.209 | 0.012 |
| 2.101205853497e-136   | 10                 | KIF4A DZ 1    |       |       |
| 1.28450719220862e-140 | 0.615949344932386  |               | 0.732 | 0.245 |
| 2.29014787298874e-136 | 10                 | CCDC69 DZ 1   |       |       |
| 1.32567112324821e-140 | 0.503546040770941  |               | 0.944 | 0.554 |
| 2.36353904563923e-136 | 10                 | UQCRQ DZ 1    |       |       |
| 2.27085687817914e-140 | -0.533670066628599 |               | 0.999 | 0.999 |
| 4.04871072810559e-136 | 10                 | RPLP1 DZ 1    |       |       |
| 2.66582331089033e-140 | 0.597182239017541  |               | 0.625 | 0.168 |
| 4.75289638098638e-136 | 10                 | TRABD DZ 1    |       |       |
| 2.78244058800876e-140 | 0.593805300001363  |               | 0.364 | 0.036 |
| 4.96081332436082e-136 | 10                 | HMMR DZ 1     |       |       |
| 1.10690346230055e-138 | 0.565754326069897  |               | 0.689 | 0.22  |
| 1.97349818293565e-134 | 10                 | UFD1 DZ 1     |       |       |
| 1.21864754476736e-138 | 0.494522544015664  |               | 0.38  | 0.045 |
| 2.17272670756572e-134 | 10                 | TIMELESS DZ 1 |       |       |
| 3.19410843209637e-138 | 0.6285650819918    | 0.701         | 0.223 |       |
| 5.69477592358462e-134 | 10                 | NCF4 DZ 1     |       |       |
| 4.96867424265337e-138 | 0.556865332030112  |               | 0.954 | 0.653 |



|                       |                    |          |      |       |       |
|-----------------------|--------------------|----------|------|-------|-------|
| 8.8586493072267e-134  | 10                 | DBI      | DZ 1 |       |       |
| 5.76506785791826e-138 | 0.555263579523575  |          |      | 0.585 | 0.152 |
| 1.02785394838825e-133 | 10                 | CENPX    | DZ 1 |       |       |
| 2.04231408351987e-137 | 0.564404141810035  |          |      | 0.473 | 0.099 |
| 3.64124177950758e-133 | 10                 | NFYB     | DZ 1 |       |       |
| 3.17972584557477e-137 | 0.48482671443992   | 0.337    |      | 0.042 |       |
| 5.66913321007525e-133 | 10                 | ASB13    | DZ 1 |       |       |
| 4.29527102617884e-137 | -0.648434756915873 |          |      | 0.999 | 0.998 |
| 7.65803871257425e-133 | 10                 | RPL18A   | DZ 1 |       |       |
| 6.58689484937373e-137 | 0.516335776820698  |          |      | 0.474 | 0.088 |
| 1.17437748269484e-132 | 10                 | HADH     | DZ 1 |       |       |
| 1.14853404980328e-136 | 0.508246157221387  |          |      | 0.923 | 0.51  |
| 2.04772135739428e-132 | 10                 | TRAPPC1  | DZ 1 |       |       |
| 2.19134904305743e-136 | 0.366525064333874  |          |      | 0.226 | 0.013 |
| 3.90695620886709e-132 | 10                 | CCNF     | DZ 1 |       |       |
| 3.29136392568547e-136 | 0.437800605424263  |          |      | 0.293 | 0.033 |
| 5.86817274310462e-132 | 10                 | NDC1     | DZ 1 |       |       |
| 7.45075408774046e-136 | 0.482669038383268  |          |      | 0.306 | 0.026 |
| 1.32839494630325e-131 | 10                 | HIST1H1E | DZ 1 |       |       |
| 7.78412010963416e-136 | 0.54991503201517   | 0.863    |      | 0.423 |       |
| 1.38783077434667e-131 | 10                 | COTL1    | DZ 1 |       |       |
| 1.01654531641267e-135 | 0.456368019623901  |          |      | 0.988 | 0.801 |
| 1.81239864463215e-131 | 10                 | TMA7     | DZ 1 |       |       |
| 2.27948773342117e-135 | 0.595547621997115  |          |      | 0.909 | 0.478 |
| 4.06409867991661e-131 | 10                 | C4orf3   | DZ 1 |       |       |
| 2.87355682965703e-135 | 0.4187483417885    | 0.264    |      | 0.03  |       |
| 5.12326447159552e-131 | 10                 | KCNK12   | DZ 1 |       |       |
| 4.57888743877795e-135 | 0.524255273855383  |          |      | 0.829 | 0.348 |
| 8.16369841459721e-131 | 10                 | PPP2CA   | DZ 1 |       |       |
| 7.72407751386357e-135 | 0.488780861700833  |          |      | 0.327 | 0.047 |
| 1.37712577994674e-130 | 10                 | BFSP2    | DZ 1 |       |       |
| 1.45371359624759e-134 | 0.529977955737972  |          |      | 0.517 | 0.119 |
| 2.59182597074983e-130 | 10                 | PAFAH1B3 | DZ 1 |       |       |
| 2.92368134996378e-134 | 0.632892358435982  |          |      | 0.763 | 0.258 |
| 5.21263147885042e-130 | 10                 | NCF1     | DZ 1 |       |       |
| 1.08335493676578e-133 | 0.387412497742008  |          |      | 0.265 | 0.023 |
| 1.93151351675971e-129 | 10                 | TEDC1    | DZ 1 |       |       |
| 1.90753321745173e-133 | 0.544472750091351  |          |      | 0.497 | 0.097 |
| 3.40094097339469e-129 | 10                 | MAP4K2   | DZ 1 |       |       |
| 2.46714560992385e-133 | 0.547341594841264  |          |      | 0.961 | 0.69  |
| 4.39867390793324e-129 | 10                 | CCNI     | DZ 1 |       |       |
| 5.21023317150481e-133 | 0.46887597376507   | 0.888    |      | 0.442 |       |
| 9.28932472147593e-129 | 10                 | LSM5     | DZ 1 |       |       |
| 8.13672124234511e-133 | 0.515772407531309  |          |      | 0.392 | 0.06  |
| 1.45069603029771e-128 | 10                 | MTA3     | DZ 1 |       |       |
| 1.35004700771993e-132 | 0.544086558526354  |          |      | 0.78  | 0.31  |
| 2.40699881006385e-128 | 10                 | SNRNP70  | DZ 1 |       |       |
| 3.38714578298611e-132 | 0.343795807318057  |          |      | 0.23  | 0.015 |
| 6.03894221648594e-128 | 10                 | GINS3    | DZ 1 |       |       |
| 5.81861876300346e-132 | 0.461682977254056  |          |      | 0.337 | 0.045 |

|                       |                   |              |       |       |
|-----------------------|-------------------|--------------|-------|-------|
| 1.03740153925589e-127 | 10                | BORCS8-MEF2B | DZ 1  |       |
| 6.84001150542175e-132 | 0.488122219702522 |              | 0.901 | 0.471 |
| 1.21950565130164e-127 | 10                | UBE2L3       | DZ 1  |       |
| 8.98276849431186e-132 | 0.517505887016492 |              | 0.652 | 0.198 |
| 1.60153779485086e-127 | 10                | COP3         | DZ 1  |       |
| 1.58486796145683e-131 | 0.523533060362149 |              | 0.435 | 0.08  |
| 2.82566108848139e-127 | 10                | XPNPEP1      | DZ 1  |       |
| 3.39358575519069e-131 | 0.449659809859275 |              | 0.333 | 0.042 |
| 6.05042404292948e-127 | 10                | TIPIN        | DZ 1  |       |
| 3.47087894846463e-131 | 0.552375714334099 |              | 0.657 | 0.21  |
| 6.18823007721759e-127 | 10                | DAZAP1       | DZ 1  |       |
| 1.10622590832139e-130 | 0.500904808552835 |              | 0.889 | 0.476 |
| 1.9722901719462e-126  | 10                | CCT8         | DZ 1  |       |
| 2.29794497178924e-130 | 0.524945215901378 |              | 0.568 | 0.141 |
| 4.09700609020304e-126 | 10                | RPP30        | DZ 1  |       |
| 4.07044342359177e-130 | 0.505013700494925 |              | 0.919 | 0.51  |
| 7.25719357992176e-126 | 10                | FKBP1A       | DZ 1  |       |
| 4.55678936606305e-130 | 0.564427254411547 |              | 0.803 | 0.316 |
| 8.1242997607538e-126  | 10                | BPTF         | DZ 1  |       |
| 6.16231282093426e-130 | 0.574572716957191 |              | 0.572 | 0.125 |
| 1.09867875284437e-125 | 10                | SOCS1        | DZ 1  |       |
| 6.68824766692432e-130 | 0.639967878991816 |              | 0.666 | 0.195 |
| 1.19244767653594e-125 | 10                | ADA          | DZ 1  |       |
| 3.6085825732784e-129  | -1.36773926091984 |              | 0.219 | 0.377 |
| 6.43374186989807e-125 | 10                | SELL         | DZ 1  |       |
| 5.11599352426927e-129 | 0.503120146932551 |              | 0.833 | 0.397 |
| 9.12130485441969e-125 | 10                | HNRNPR       | DZ 1  |       |
| 5.35404601576007e-129 | 0.523658617649597 |              | 0.734 | 0.27  |
| 9.54572864149862e-125 | 10                | UQCRC1       | DZ 1  |       |
| 5.35442154504234e-129 | 0.537076916720978 |              | 0.799 | 0.346 |
| 9.54639817265599e-125 | 10                | TKT          | DZ 1  |       |
| 1.01983454417401e-128 | 0.422163725030106 |              | 0.287 | 0.031 |
| 1.81826300880785e-124 | 10                | EEP1         | DZ 1  |       |
| 1.18777835416762e-128 | 0.458389976983208 |              | 0.322 | 0.039 |
| 2.11769002764544e-124 | 10                | RCCD1        | DZ 1  |       |
| 1.62895367390391e-128 | 0.617843119942058 |              | 0.549 | 0.124 |
| 2.90426150520328e-124 | 10                | SIT1         | DZ 1  |       |
| 1.89310448050831e-128 | 0.534457226977053 |              | 0.716 | 0.25  |
| 3.37521597829826e-124 | 10                | RAB5IF       | DZ 1  |       |
| 2.60081350814521e-128 | 0.512600705945717 |              | 0.827 | 0.368 |
| 4.63699040367209e-124 | 10                | SNRPD3       | DZ 1  |       |
| 3.68438183382162e-128 | -1.247604171021   | 0.772        | 0.794 |       |
| 6.56888437152057e-124 | 10                | HLA-E        | DZ 1  |       |
| 5.4150870960281e-128  | 0.508871655113983 |              | 0.514 | 0.108 |
| 9.6545587835085e-124  | 10                | CFAP20       | DZ 1  |       |
| 1.24795506570838e-127 | 0.542618229905715 |              | 0.609 | 0.176 |
| 2.22497908665147e-123 | 10                | MAP2K1       | DZ 1  |       |
| 1.8582594891045e-127  | 0.623060956500499 |              | 0.499 | 0.093 |
| 3.31309084312442e-123 | 10                | HRK          | DZ 1  |       |
| 2.94829388861476e-127 | 0.537548374724884 |              | 0.47  | 0.104 |

|                       |                    |        |      |       |       |
|-----------------------|--------------------|--------|------|-------|-------|
| 5.25651317401125e-123 | 10                 | GOT2   | DZ 1 |       |       |
| 3.75725982523597e-127 | 0.469163322790747  |        |      | 0.423 | 0.072 |
| 6.69881854241321e-123 | 10                 | NCAPH2 | DZ 1 |       |       |
| 8.07824216415478e-127 | 0.420714859802449  |        |      | 0.982 | 0.799 |
| 1.44026979544716e-122 | 10                 | HNRNPK | DZ 1 |       |       |
| 9.28801649669877e-127 | -0.621060289378032 |        |      | 0.999 | 0.999 |
| 1.65596046119642e-122 | 10                 | RPL32  | DZ 1 |       |       |
| 1.02471072589403e-126 | 0.478762257593322  |        |      | 0.903 | 0.477 |
| 1.82695675319647e-122 | 10                 | SF3B6  | DZ 1 |       |       |
| 2.40315365810584e-126 | 0.433511619468158  |        |      | 0.35  | 0.043 |
| 4.2845826570369e-122  | 10                 | POLD1  | DZ 1 |       |       |
| 3.49487152331429e-125 | 0.481940885641755  |        |      | 0.396 | 0.054 |
| 6.23100643891704e-121 | 10                 | ACYP1  | DZ 1 |       |       |
| 6.64013179059889e-125 | -1.01640326723534  |        |      | 0.967 | 0.963 |
| 1.18386909694588e-120 | 10                 | FTL    | DZ 1 |       |       |
| 7.55452267127623e-125 | 0.500819111143372  |        |      | 0.911 | 0.521 |
| 1.34689584706184e-120 | 10                 | SOD1   | DZ 1 |       |       |
| 1.20673663173559e-124 | -0.653795314194666 |        |      | 0.997 | 0.996 |
| 2.15149074072138e-120 | 10                 | RPL35A | DZ 1 |       |       |
| 1.22371474552926e-124 | -1.19955830712931  |        |      | 0.092 | 0.28  |
| 2.18176101980413e-120 | 10                 | KLF2   | DZ 1 |       |       |
| 1.23851097400732e-124 | 0.508642659076498  |        |      | 0.52  | 0.112 |
| 2.20814121555765e-120 | 10                 | ARL3   | DZ 1 |       |       |
| 1.3366666019979e-124  | 0.516236945472805  |        |      | 0.818 | 0.352 |
| 2.38314288470205e-120 | 10                 | EWSR1  | DZ 1 |       |       |
| 2.64137231919253e-124 | 0.316158831691644  |        |      | 0.194 | 0.012 |
| 4.70930270788836e-120 | 10                 | TTK    | DZ 1 |       |       |
| 9.83244808964216e-124 | 0.507996224834985  |        |      | 0.622 | 0.173 |
| 1.7530271699023e-119  | 10                 | GLRX5  | DZ 1 |       |       |
| 1.22907892836655e-123 | 0.507099323250674  |        |      | 0.355 | 0.048 |
| 2.19132482138472e-119 | 10                 | SGO2   | DZ 1 |       |       |
| 1.51331185917722e-123 | 0.484832157094154  |        |      | 0.604 | 0.17  |
| 2.69808371372706e-119 | 10                 | BID    | DZ 1 |       |       |
| 1.75165609146737e-123 | 0.390890127709328  |        |      | 0.276 | 0.029 |
| 3.12302764547717e-119 | 10                 | FKBP5  | DZ 1 |       |       |
| 5.16725386083064e-123 | 0.522757506449403  |        |      | 0.75  | 0.28  |
| 9.21269690847494e-119 | 10                 | LYPLA1 | DZ 1 |       |       |
| 5.3939828553425e-123  | 0.456727060936931  |        |      | 0.345 | 0.043 |
| 9.61693203279015e-119 | 10                 | BRCA2  | DZ 1 |       |       |
| 5.82662185251323e-123 | 0.508346855434817  |        |      | 0.766 | 0.322 |
| 1.03882841008458e-118 | 10                 | ACAT2  | DZ 1 |       |       |
| 1.09349689151034e-122 | 0.488033406425687  |        |      | 0.852 | 0.413 |
| 1.94959560787379e-118 | 10                 | MINOS1 | DZ 1 |       |       |
| 1.21711698905903e-122 | 0.539726675335424  |        |      | 0.665 | 0.233 |
| 2.16999787979334e-118 | 10                 | SNRPA1 | DZ 1 |       |       |
| 2.64749242990397e-122 | 0.474367721114779  |        |      | 0.44  | 0.073 |
| 4.72021425327578e-118 | 10                 | MIS18A | DZ 1 |       |       |
| 2.99839643511978e-122 | 0.477238854979078  |        |      | 0.902 | 0.467 |
| 5.34584100417506e-118 | 10                 | TRA2B  | DZ 1 |       |       |
| 3.98339777800447e-122 | 0.480703428741628  |        |      | 0.906 | 0.489 |

|                       |                    |          |      |       |       |
|-----------------------|--------------------|----------|------|-------|-------|
| 7.10199989840417e-118 | 10                 | GNG5     | DZ 1 |       |       |
| 4.32910141517481e-122 | 0.479702894116898  |          |      | 0.885 | 0.482 |
| 7.71835491311517e-118 | 10                 | ARL6IP4  | DZ 1 |       |       |
| 6.21822587553676e-122 | 0.531609478865098  |          |      | 0.69  | 0.229 |
| 1.10864749134945e-117 | 10                 | DCTN3    | DZ 1 |       |       |
| 8.13413873603178e-122 | -0.569613582771485 |          |      | 0.999 | 0.999 |
| 1.45023559524711e-117 | 10                 | RPS27A   | DZ 1 |       |       |
| 9.76217816758139e-122 | 0.480000808278665  |          |      | 0.379 | 0.06  |
| 1.74049874549809e-117 | 10                 | TERF2    | DZ 1 |       |       |
| 2.44247412030072e-121 | 0.547396682487075  |          |      | 0.562 | 0.135 |
| 4.35468710908416e-117 | 10                 | PTPN18   | DZ 1 |       |       |
| 6.68022251202392e-121 | 0.486845018264159  |          |      | 0.643 | 0.219 |
| 1.19101687166875e-116 | 10                 | CDK4     | DZ 1 |       |       |
| 8.62547733066315e-121 | 0.485391529802454  |          |      | 0.575 | 0.157 |
| 1.53783635328393e-116 | 10                 | EED      | DZ 1 |       |       |
| 1.16426842524807e-120 | 0.507008452357671  |          |      | 0.621 | 0.177 |
| 2.07577417537478e-116 | 10                 | HNRNPUL1 | DZ 1 |       |       |
| 2.41401353353329e-120 | 0.502780174085714  |          |      | 0.715 | 0.251 |
| 4.3039447289365e-116  | 10                 | PPP1R7   | DZ 1 |       |       |
| 2.71287903249579e-120 | 0.524116227283829  |          |      | 0.522 | 0.121 |
| 4.83679202703674e-116 | 10                 | MAP4K1   | DZ 1 |       |       |
| 7.11122404000346e-120 | 0.528409661247228  |          |      | 0.782 | 0.308 |
| 1.26786013409222e-115 | 10                 | HSBP1    | DZ 1 |       |       |
| 1.72646339506687e-119 | 0.322170556496289  |          |      | 0.188 | 0.013 |
| 3.07811158706473e-115 | 10                 | DEPDC1B  | DZ 1 |       |       |
| 2.33447022406006e-119 | 0.511478626617326  |          |      | 0.475 | 0.104 |
| 4.16212696247669e-115 | 10                 | DBF4     | DZ 1 |       |       |
| 4.98129257836365e-119 | 0.456708132382014  |          |      | 0.364 | 0.052 |
| 8.88114653796455e-115 | 10                 | DTX1     | DZ 1 |       |       |
| 5.9516278464513e-119  | 0.521202249309489  |          |      | 0.562 | 0.139 |
| 1.0611157287438e-114  | 10                 | MYL6B    | DZ 1 |       |       |
| 1.05114678444677e-118 | 0.51816599373421   | 0.655    |      | 0.193 |       |
| 1.87408960199015e-114 | 10                 | MIS18BP1 | DZ 1 |       |       |
| 1.73737117557505e-118 | 0.431397432027802  |          |      | 0.907 | 0.489 |
| 3.09755906893275e-114 | 10                 | NDUFA11  | DZ 1 |       |       |
| 1.82331982405751e-118 | 0.57324441857886   | 0.625    |      | 0.193 |       |
| 3.25079691431213e-114 | 10                 | SNHG25   | DZ 1 |       |       |
| 2.18573952041935e-118 | -1.05865270368717  |          |      | 0.501 | 0.624 |
| 3.89695499095566e-114 | 10                 | SUB1     | DZ 1 |       |       |
| 2.66787496188373e-118 | 0.572259947940303  |          |      | 0.699 | 0.249 |
| 4.7565542695425e-114  | 10                 | CD22     | DZ 1 |       |       |
| 7.34515690009829e-118 | 0.426040137179657  |          |      | 0.327 | 0.04  |
| 1.30956802371852e-113 | 10                 | POLD3    | DZ 1 |       |       |
| 8.58304705600437e-118 | 0.47745521609692   | 0.802    |      | 0.348 |       |
| 1.53027145961502e-113 | 10                 | ELOC     | DZ 1 |       |       |
| 1.08000643248547e-117 | 0.469776840937529  |          |      | 0.371 | 0.051 |
| 1.92554346847835e-113 | 10                 | DCAF12   | DZ 1 |       |       |
| 2.31201537911388e-117 | 0.489554669310446  |          |      | 0.705 | 0.251 |
| 4.12209221942215e-113 | 10                 | MTCH2    | DZ 1 |       |       |
| 2.5047763993949e-117  | 0.485532411096877  |          |      | 0.358 | 0.053 |

|                       |                    |               |       |       |
|-----------------------|--------------------|---------------|-------|-------|
| 4.46576584248116e-113 | 10                 | PITPNC1 DZ 1  |       |       |
| 2.59267216794467e-117 | 0.502453147555709  |               | 0.673 | 0.225 |
| 4.62247520822855e-113 | 10                 | CPSF6 DZ 1    |       |       |
| 3.16371349844541e-117 | -0.636800714066652 |               | 0.999 | 0.998 |
| 5.64058479637832e-113 | 10                 | RPLP2 DZ 1    |       |       |
| 3.27437828018099e-117 | 0.360360034919572  |               | 0.223 | 0.017 |
| 5.83788903573469e-113 | 10                 | ARHGAP11A     | DZ 1  |       |
| 4.91906911176894e-117 | 0.343767732954322  |               | 0.94  | 0.585 |
| 8.77020831937283e-113 | 10                 | LDHA DZ 1     |       |       |
| 7.57046165030698e-117 | -1.04108808220331  |               | 0.043 | 0.217 |
| 1.34973760763323e-112 | 10                 | PLAC8 DZ 1    |       |       |
| 1.13431233195542e-116 | 0.543167289654748  |               | 0.613 | 0.166 |
| 2.02236545664332e-112 | 10                 | ZNF106 DZ 1   |       |       |
| 2.50719663597013e-116 | 0.575773565033042  |               | 0.896 | 0.475 |
| 4.47008088227115e-112 | 10                 | UCP2 DZ 1     |       |       |
| 3.57431603187307e-116 | 0.518312868336708  |               | 0.624 | 0.182 |
| 6.37264805322649e-112 | 10                 | UBE2E1 DZ 1   |       |       |
| 4.70707610235304e-116 | 0.502281890587489  |               | 0.662 | 0.226 |
| 8.39224598288523e-112 | 10                 | SRSF1 DZ 1    |       |       |
| 5.60158864172139e-116 | 0.436281503895249  |               | 0.938 | 0.618 |
| 9.98707238932506e-112 | 10                 | ATP5F1B DZ 1  |       |       |
| 5.61000272936705e-116 | 0.403563081274532  |               | 0.933 | 0.559 |
| 1.00020738661885e-111 | 10                 | SNRPE DZ 1    |       |       |
| 5.78763840839544e-116 | 0.384972904858025  |               | 0.22  | 0.006 |
| 1.03187805183282e-111 | 10                 | HIST1H1B DZ 1 |       |       |
| 7.30900907128578e-116 | 0.389495983704214  |               | 0.248 | 0.028 |
| 1.30312322731954e-111 | 10                 | NUGGC DZ 1    |       |       |
| 1.07090599296588e-115 | 0.476638641520918  |               | 0.677 | 0.236 |
| 1.90931829485887e-111 | 10                 | NAP1L4 DZ 1   |       |       |
| 1.10256177256749e-115 | 0.432962733275792  |               | 0.294 | 0.036 |
| 1.96575738431058e-111 | 10                 | ASB2 DZ 1     |       |       |
| 1.17711456338553e-115 | 0.587637202022255  |               | 0.647 | 0.195 |
| 2.09867755506005e-111 | 10                 | SYAP1 DZ 1    |       |       |
| 1.43043768336537e-115 | 0.451052469619597  |               | 0.899 | 0.488 |
| 2.55032734567213e-111 | 10                 | RTRAF DZ 1    |       |       |
| 2.55256486321733e-115 | 0.499892349786087  |               | 0.551 | 0.142 |
| 4.55096789463017e-111 | 10                 | ACTL6A DZ 1   |       |       |
| 3.58948402713203e-115 | 0.410246193804511  |               | 0.971 | 0.687 |
| 6.39969107197369e-111 | 10                 | ATP5MPL DZ 1  |       |       |
| 4.23019032435155e-115 | 0.519367969485494  |               | 0.621 | 0.183 |
| 7.54200632928637e-111 | 10                 | POLD4 DZ 1    |       |       |
| 5.15589348905535e-115 | 0.51207346230817   | 0.742         | 0.294 |       |
| 9.19244250163678e-111 | 10                 | FKBP3 DZ 1    |       |       |
| 6.37423627626386e-115 | 0.43109952758084   | 0.322         | 0.038 |       |
| 1.13646258569508e-110 | 10                 | FANCL DZ 1    |       |       |
| 1.16152964061272e-114 | -0.481745489032161 |               | 1     | 0.999 |
| 2.07089119624843e-110 | 10                 | RPL10 DZ 1    |       |       |
| 1.68860928824085e-114 | 0.498628632151578  |               | 0.774 | 0.307 |
| 3.01062150000461e-110 | 10                 | GNB2 DZ 1     |       |       |
| 2.21785456081417e-114 | 0.561265379553002  |               | 0.484 | 0.099 |

|                       |                   |         |      |       |       |
|-----------------------|-------------------|---------|------|-------|-------|
| 3.95421289647558e-110 | 10                | CPNE5   | DZ 1 |       |       |
| 2.68356512519254e-114 | 0.545799120219174 |         |      | 0.707 | 0.255 |
| 4.78452826170579e-110 | 10                | TOP1    | DZ 1 |       |       |
| 3.19177005035201e-114 | 0.508445630404154 |         |      | 0.423 | 0.079 |
| 5.6906068227726e-110  | 10                | ABHD3   | DZ 1 |       |       |
| 5.04618363523051e-114 | 0.508221280245801 |         |      | 0.97  | 0.717 |
| 8.99684080325247e-110 | 10                | LIMD2   | DZ 1 |       |       |
| 1.13663920321673e-113 | 0.485637361656718 |         |      | 0.486 | 0.115 |
| 2.0265140354151e-109  | 10                | PGP     | DZ 1 |       |       |
| 2.19108495600098e-113 | 0.623483918994234 |         |      | 0.63  | 0.223 |
| 3.90648536805414e-109 | 10                | DSTN    | DZ 1 |       |       |
| 2.39172262961212e-113 | 0.601333207860554 |         |      | 0.367 | 0.037 |
| 4.26420227633546e-109 | 10                | CDC20   | DZ 1 |       |       |
| 3.02744691559708e-113 | 0.395481401147695 |         |      | 0.967 | 0.708 |
| 5.39763510581804e-109 | 10                | COX6B1  | DZ 1 |       |       |
| 3.63386454015132e-113 | 0.486335827849811 |         |      | 0.699 | 0.252 |
| 6.4788170886358e-109  | 10                | PMF1    | DZ 1 |       |       |
| 4.8194887343783e-113  | 0.489153518983087 |         |      | 0.661 | 0.226 |
| 8.59266646452308e-109 | 10                | SUM03   | DZ 1 |       |       |
| 8.52830620394856e-113 | 0.469555709860993 |         |      | 0.86  | 0.404 |
| 1.52051171310199e-108 | 10                | NDUFA12 | DZ 1 |       |       |
| 9.54973676003044e-113 | 0.395277421017    | 0.97    |      | 0.691 |       |
| 1.70262256694583e-108 | 10                | ELOB    | DZ 1 |       |       |
| 9.96361103777521e-113 | 0.640988626913068 |         |      | 0.623 | 0.171 |
| 1.77641221192494e-108 | 10                | RGS2    | DZ 1 |       |       |
| 1.0076896865112e-112  | 0.50847706247748  | 0.756   |      | 0.291 |       |
| 1.79660994208082e-108 | 10                | TIMM8B  | DZ 1 |       |       |
| 1.02049136574158e-112 | 0.369677538791237 |         |      | 0.197 | 0.015 |
| 1.81943405598066e-108 | 10                | BEX3    | DZ 1 |       |       |
| 1.1946812540537e-112  | 0.424719587918785 |         |      | 0.327 | 0.046 |
| 2.12999720785235e-108 | 10                | GALK1   | DZ 1 |       |       |
| 1.6467629699253e-112  | 0.452474158707546 |         |      | 0.791 | 0.358 |
| 2.93601369907982e-108 | 10                | DDT     | DZ 1 |       |       |
| 2.48019847434135e-112 | 0.471958883148701 |         |      | 0.473 | 0.096 |
| 4.42194585990319e-108 | 10                | RABL6   | DZ 1 |       |       |
| 3.12327880448333e-112 | 0.427913032717875 |         |      | 0.954 | 0.624 |
| 5.56849378051332e-108 | 10                | BRK1    | DZ 1 |       |       |
| 4.96402454999255e-112 | 0.477960303478709 |         |      | 0.789 | 0.331 |
| 8.85035937018172e-108 | 10                | UBE2A   | DZ 1 |       |       |
| 6.1557764585663e-112  | 0.488841313002097 |         |      | 0.825 | 0.371 |
| 1.09751338479779e-107 | 10                | NDUFB3  | DZ 1 |       |       |
| 6.96665661471459e-112 | 0.400331083215867 |         |      | 0.95  | 0.674 |
| 1.24208520783746e-107 | 10                | SLC25A3 | DZ 1 |       |       |
| 7.02327371675944e-112 | 0.44340909535604  | 0.358   |      | 0.057 |       |
| 1.25217947096104e-107 | 10                | TEX9    | DZ 1 |       |       |
| 1.06443011864236e-111 | 0.417928078452297 |         |      | 0.907 | 0.53  |
| 1.89777245852747e-107 | 10                | SUM01   | DZ 1 |       |       |
| 2.42632596134422e-111 | 0.439175076611467 |         |      | 0.872 | 0.442 |
| 4.32589655648061e-107 | 10                | PPP4C   | DZ 1 |       |       |
| 3.55081062989041e-111 | -1.13521339591275 |         |      | 0.126 | 0.302 |

|                       |                   |           |       |       |
|-----------------------|-------------------|-----------|-------|-------|
| 6.33074027203162e-107 | 10                | LINC00926 | DZ 1  |       |
| 4.9165681624767e-111  | 0.462491509220764 |           | 0.794 | 0.341 |
| 8.76574937687971e-107 | 10                | AP2S1     | DZ 1  |       |
| 5.78030494110724e-111 | 0.454617513193038 |           | 0.312 | 0.042 |
| 1.03057056795001e-106 | 10                | CPM       | DZ 1  |       |
| 6.80037362426484e-111 | 0.508769793458431 |           | 0.612 | 0.178 |
| 1.21243861347018e-106 | 10                | CNTRL     | DZ 1  |       |
| 1.51953584359529e-110 | 0.493260414516606 |           | 0.576 | 0.164 |
| 2.70918045554605e-106 | 10                | HINT2     | DZ 1  |       |
| 1.67353281979484e-110 | 0.514940456814001 |           | 0.713 | 0.294 |
| 2.98374166441223e-106 | 10                | FERMT3    | DZ 1  |       |
| 1.73244122030276e-110 | 0.444286182549108 |           | 0.936 | 0.603 |
| 3.0887694516778e-106  | 10                | ARPC5     | DZ 1  |       |
| 1.95345555683634e-110 | 0.37856614141634  | 0.9       | 0.499 |       |
| 3.4828159122835e-106  | 10                | PA2G4     | DZ 1  |       |
| 2.65245623882419e-110 | 0.454198006727361 |           | 0.689 | 0.239 |
| 4.72906422819966e-106 | 10                | LUC7L2    | DZ 1  |       |
| 2.73373163560958e-110 | 0.520238043145545 |           | 0.681 | 0.236 |
| 4.87397013312833e-106 | 10                | TIFA      | DZ 1  |       |
| 2.84415273781209e-110 | 0.449783022410363 |           | 0.848 | 0.413 |
| 5.07083991624517e-106 | 10                | ANP32A    | DZ 1  |       |
| 6.89421995059684e-110 | 0.492735266931052 |           | 0.381 | 0.067 |
| 1.22917047499191e-105 | 10                | KLHL6     | DZ 1  |       |
| 7.32113664171765e-110 | 0.47090902409957  | 0.706     | 0.258 |       |
| 1.30528545185184e-105 | 10                | CAMTA1    | DZ 1  |       |
| 4.57392863103505e-109 | 0.462177537348246 |           | 0.642 | 0.202 |
| 8.15485735627239e-105 | 10                | HPRT1     | DZ 1  |       |
| 8.536516523124e-109   | 0.478358849643511 |           | 0.512 | 0.129 |
| 1.52197553090778e-104 | 10                | ANAPC15   | DZ 1  |       |
| 1.19312174585858e-108 | 0.470157158526131 |           | 0.456 | 0.093 |
| 2.12721676069126e-104 | 10                | MGME1     | DZ 1  |       |
| 1.4411760703441e-108  | 0.402301960697443 |           | 0.942 | 0.593 |
| 2.56947281581649e-104 | 10                | PSMB3     | DZ 1  |       |
| 1.82749436957158e-108 | 0.450845054228829 |           | 0.785 | 0.335 |
| 3.25823971150917e-104 | 10                | LSM14A    | DZ 1  |       |
| 2.2581841086536e-108  | 0.489952580007683 |           | 0.597 | 0.168 |
| 4.0261164473185e-104  | 10                | MED30     | DZ 1  |       |
| 3.00981547800208e-108 | 0.453145190835583 |           | 0.671 | 0.234 |
| 5.36620001572991e-104 | 10                | MEA1      | DZ 1  |       |
| 3.66858372694856e-108 | 0.466791789807936 |           | 0.493 | 0.114 |
| 6.54071792677658e-104 | 10                | CMC2      | DZ 1  |       |
| 5.07708806133396e-108 | 0.394629119342949 |           | 0.948 | 0.631 |
| 9.05194030455232e-104 | 10                | HNRNPM    | DZ 1  |       |
| 1.73500133009042e-107 | 0.434719997831838 |           | 0.679 | 0.233 |
| 3.09333387141821e-103 | 10                | UBA2      | DZ 1  |       |
| 1.91873614078616e-107 | 0.422626886912236 |           | 0.728 | 0.289 |
| 3.42091466540765e-103 | 10                | ODC1      | DZ 1  |       |
| 2.22692279143775e-107 | 0.348387486841029 |           | 0.266 | 0.025 |
| 3.97038064485436e-103 | 10                | PSMC3IP   | DZ 1  |       |
| 2.31105711137157e-107 | 0.492122702062582 |           | 0.708 | 0.253 |

|                       |                   |          |      |       |       |
|-----------------------|-------------------|----------|------|-------|-------|
| 4.12038372386437e-103 | 10                | TXNDC17  | DZ 1 |       |       |
| 4.08276331718171e-107 | 0.483084848208531 |          |      | 0.652 | 0.202 |
| 7.27915871820326e-103 | 10                | PNKD     | DZ 1 |       |       |
| 5.07618256564965e-107 | 0.514351428707078 |          |      | 0.681 | 0.238 |
| 9.05032589629677e-103 | 10                | RGS10    | DZ 1 |       |       |
| 5.74374432797263e-107 | 0.443228053719642 |          |      | 0.314 | 0.049 |
| 1.02405217623424e-102 | 10                | MBD2     | DZ 1 |       |       |
| 6.81797831637993e-107 | 0.449388020106491 |          |      | 0.779 | 0.33  |
| 1.21557735402738e-102 | 10                | MRPS34   | DZ 1 |       |       |
| 7.02414129531437e-107 | 0.55181464860648  | 0.429    |      | 0.086 |       |
| 1.2523341515416e-102  | 10                | CCDC28B  | DZ 1 |       |       |
| 8.88155225614804e-107 | 0.468479467459336 |          |      | 0.674 | 0.235 |
| 1.58349195174863e-102 | 10                | MRPL13   | DZ 1 |       |       |
| 8.99346597767472e-107 | 0.363768373895499 |          |      | 0.997 | 0.96  |
| 1.60344504915963e-102 | 10                | OAZ1     | DZ 1 |       |       |
| 1.00179797237877e-106 | 0.382904808918124 |          |      | 0.931 | 0.583 |
| 1.78610560495411e-102 | 10                | TBCA     | DZ 1 |       |       |
| 1.93037421858296e-106 | 0.522036555155769 |          |      | 0.779 | 0.313 |
| 3.44166419431156e-102 | 10                | GYPC     | DZ 1 |       |       |
| 2.3530119575768e-106  | 0.372265608769619 |          |      | 0.944 | 0.589 |
| 4.19518501916368e-102 | 10                | PSMA2    | DZ 1 |       |       |
| 2.46182488863753e-106 | 0.528033773782991 |          |      | 0.786 | 0.346 |
| 4.38918759395185e-102 | 10                | TPD52    | DZ 1 |       |       |
| 3.16239977038255e-106 | 0.360276841199965 |          |      | 0.243 | 0.02  |
| 5.63824255061505e-102 | 10                | NCAPD3   | DZ 1 |       |       |
| 5.36054229306931e-106 | 0.482756558322362 |          |      | 0.56  | 0.148 |
| 9.55731085431327e-102 | 10                | UBE2R2   | DZ 1 |       |       |
| 5.78568373805087e-106 | 0.354803776806158 |          |      | 0.242 | 0.027 |
| 1.03152955365709e-101 | 10                | PDGFD    | DZ 1 |       |       |
| 6.41439269649133e-106 | -0.94199338293651 |          |      | 0.978 | 0.968 |
| 1.14362207385744e-101 | 10                | MT-ND3   | DZ 1 |       |       |
| 6.45278729401622e-106 | 0.321970070526986 |          |      | 0.203 | 0.017 |
| 1.15046744665015e-101 | 10                | FAM81A   | DZ 1 |       |       |
| 9.64380365206523e-106 | 0.489143623713788 |          |      | 0.547 | 0.144 |
| 1.71939375312671e-101 | 10                | SMIM20   | DZ 1 |       |       |
| 1.38897533252212e-105 | 0.33231077753665  | 0.228    |      | 0.017 |       |
| 2.47640412035368e-101 | 10                | C1orf112 | DZ 1 |       |       |
| 3.18838181095188e-105 | 0.443687880083514 |          |      | 0.735 | 0.291 |
| 5.68456593074611e-101 | 10                | ELAVL1   | DZ 1 |       |       |
| 2.7327120802925e-104  | 0.44403732470124  | 0.349    |      | 0.051 |       |
| 4.87215236795349e-100 | 10                | TESC     | DZ 1 |       |       |
| 3.30030903395369e-104 | 0.437859726348929 |          |      | 0.659 | 0.228 |
| 5.88412097663603e-100 | 10                | PTBP1    | DZ 1 |       |       |
| 4.25288094418737e-104 | 0.372562350448835 |          |      | 0.934 | 0.607 |
| 7.58246143539165e-100 | 10                | NDUFA13  | DZ 1 |       |       |
| 4.58262007075781e-104 | 0.398713620765301 |          |      | 0.93  | 0.561 |
| 8.17035332415409e-100 | 10                | PARK7    | DZ 1 |       |       |
| 4.76895276895901e-104 | 0.421127275307454 |          |      | 0.331 | 0.054 |
| 8.50256589177701e-100 | 10                | FAM129A  | DZ 1 |       |       |
| 7.94585366771615e-104 | 0.468418882486294 |          |      | 0.78  | 0.335 |



|                       |                    |         |       |  |  |
|-----------------------|--------------------|---------|-------|--|--|
| 1.41666625041711e-99  | 10                 | PDIA6   | DZ 1  |  |  |
| 1.61825388638742e-103 | 0.32180446736776   | 0.205   | 0.017 |  |  |
| 2.88518485404013e-99  | 10                 | TCEAL9  | DZ 1  |  |  |
| 3.49278647554441e-103 | 0.56711048439965   | 0.268   | 0.026 |  |  |
| 6.22728900724812e-99  | 10                 | PLK1    | DZ 1  |  |  |
| 3.67772972422659e-103 | 0.418461572221862  | 0.813   | 0.375 |  |  |
| 6.55702432532359e-99  | 10                 | CCT5    | DZ 1  |  |  |
| 4.17868635658047e-103 | -0.619337715442508 | 0.999   | 0.999 |  |  |
| 7.45017990514732e-99  | 10                 | RPL39   | DZ 1  |  |  |
| 4.39423368305441e-103 | 0.452838281779888  | 0.44    | 0.088 |  |  |
| 7.83447923351771e-99  | 10                 | TACC1   | DZ 1  |  |  |
| 4.99204775181354e-103 | 0.415093289226003  | 0.879   | 0.464 |  |  |
| 8.90032193670836e-99  | 10                 | UBE2N   | DZ 1  |  |  |
| 5.50869428742718e-103 | 0.379550034557175  | 0.854   | 0.448 |  |  |
| 9.82145104505392e-99  | 10                 | HSPD1   | DZ 1  |  |  |
| 6.12544760695256e-103 | 0.455656049429274  | 0.849   | 0.388 |  |  |
| 1.09210605384357e-98  | 10                 | MBD4    | DZ 1  |  |  |
| 8.67813000312683e-103 | 0.333199978397297  | 0.243   | 0.024 |  |  |
| 1.54722379825748e-98  | 10                 | RMI1    | DZ 1  |  |  |
| 9.10625434191965e-103 | 0.330569737771567  | 0.216   | 0.024 |  |  |
| 1.62355408662086e-98  | 10                 | SCARB1  | DZ 1  |  |  |
| 1.08313890904287e-102 | -1.07715191013763  | 0.471   | 0.611 |  |  |
| 1.93112836093253e-98  | 10                 | IGHD    | DZ 1  |  |  |
| 1.19595964661484e-102 | 0.336583741529068  | 0.972   | 0.752 |  |  |
| 2.1322764539496e-98   | 10                 | PSMA7   | DZ 1  |  |  |
| 1.35656626312601e-102 | 0.45350012121582   | 0.457   | 0.105 |  |  |
| 2.41862199052736e-98  | 10                 | SLC25A1 | DZ 1  |  |  |
| 2.3162402341708e-102  | 0.438394362883856  | 0.741   | 0.311 |  |  |
| 4.12962471350311e-98  | 10                 | AKR1B1  | DZ 1  |  |  |
| 3.24183580073757e-102 | 0.437580237265299  | 0.817   | 0.373 |  |  |
| 5.77986904913502e-98  | 10                 | NDUFS6  | DZ 1  |  |  |
| 4.40652763178209e-102 | 0.388834499743451  | 0.262   | 0.032 |  |  |
| 7.85639811470429e-98  | 10                 | SYBU    | DZ 1  |  |  |
| 4.73532905949676e-102 | 0.384136311140404  | 0.322   | 0.042 |  |  |
| 8.44261818017678e-98  | 10                 | CDK2    | DZ 1  |  |  |
| 4.8461062796668e-102  | 0.461032330133004  | 0.526   | 0.143 |  |  |
| 8.64012288601794e-98  | 10                 | GNB1    | DZ 1  |  |  |
| 4.84717279013608e-102 | 0.440138008373749  | 0.336   | 0.052 |  |  |
| 8.64202436753361e-98  | 10                 | CCDC18  | DZ 1  |  |  |
| 7.03554917609314e-102 | 0.384880266036977  | 0.261   | 0.027 |  |  |
| 1.25436806260565e-97  | 10                 | FANCD2  | DZ 1  |  |  |
| 7.6796767329634e-102  | 0.439116833949686  | 0.661   | 0.231 |  |  |
| 1.36920956472004e-97  | 10                 | AK2     | DZ 1  |  |  |
| 9.2466971805205e-102  | 0.460437833461177  | 0.708   | 0.256 |  |  |
| 1.648593640315e-97    | 10                 | TXNL4A  | DZ 1  |  |  |
| 1.7952959344648e-101  | 0.447211119639365  | 0.386   | 0.073 |  |  |
| 3.20083312155729e-97  | 10                 | BPNT1   | DZ 1  |  |  |
| 1.83477883191626e-101 | -0.614451508438083 | 0.999   | 0.998 |  |  |
| 3.2712271794235e-97   | 10                 | RPL11   | DZ 1  |  |  |
| 8.54660005598204e-101 | 0.484416968510507  | 0.489   | 0.115 |  |  |

|                       |                    |         |      |       |       |
|-----------------------|--------------------|---------|------|-------|-------|
| 1.52377332398104e-96  | 10                 | MSI2    | DZ 1 |       |       |
| 9.80759941456569e-101 | 0.482052720438373  |         |      | 0.42  | 0.09  |
| 1.74859689962292e-96  | 10                 | PTPN7   | DZ 1 |       |       |
| 1.29172217141074e-100 | 0.406714177624887  |         |      | 0.864 | 0.415 |
| 2.30301145940821e-96  | 10                 | IRF8    | DZ 1 |       |       |
| 1.80539253148971e-100 | 0.449830615013149  |         |      | 0.575 | 0.174 |
| 3.218834344393e-96    | 10                 | SNRPA   | DZ 1 |       |       |
| 2.39305870946166e-100 | -0.704354758804892 |         |      | 0.993 | 0.991 |
| 4.26658437309919e-96  | 10                 | RPL9    | DZ 1 |       |       |
| 2.77261652757339e-100 | 0.467808131396502  |         |      | 0.484 | 0.144 |
| 4.94329800701059e-96  | 10                 | PAICS   | DZ 1 |       |       |
| 5.33907982724301e-100 | 0.440938590269416  |         |      | 0.544 | 0.156 |
| 9.51904542399157e-96  | 10                 | EXOSC3  | DZ 1 |       |       |
| 8.03040494314141e-100 | -0.64350895311246  |         |      | 0.999 | 0.995 |
| 1.43174089731268e-95  | 10                 | RPL31   | DZ 1 |       |       |
| 8.15748022016663e-100 | 0.456612195438204  |         |      | 0.479 | 0.121 |
| 1.45439714845351e-95  | 10                 | PRKCD   | DZ 1 |       |       |
| 1.09870091614647e-99  | 0.340602191088012  |         |      | 0.271 | 0.038 |
| 1.95887386339753e-95  | 10                 | ALYREF  | DZ 1 |       |       |
| 1.18310416342493e-99  | 0.446124362803816  |         |      | 0.756 | 0.322 |
| 2.10935641297031e-95  | 10                 | SEPHS2  | DZ 1 |       |       |
| 1.28837180866362e-99  | -0.96372666352435  |         |      | 0.038 | 0.226 |
| 2.29703809766637e-95  | 10                 | GBP2    | DZ 1 |       |       |
| 2.2553222926472e-99   | 0.407620441215261  |         |      | 0.331 | 0.063 |
| 4.0210141155607e-95   | 10                 | NEK6    | DZ 1 |       |       |
| 9.40199687038724e-99  | 0.393382416884148  |         |      | 0.905 | 0.503 |
| 1.67628202202134e-94  | 10                 | SMDT1   | DZ 1 |       |       |
| 9.45380182623237e-99  | -0.607267707275664 |         |      | 0.998 | 0.995 |
| 1.68551832759897e-94  | 10                 | RPS25   | DZ 1 |       |       |
| 1.03738033992559e-98  | 0.43251230198828   | 0.643   |      | 0.213 |       |
| 1.84954540805334e-94  | 10                 | PLEKHJ1 | DZ 1 |       |       |
| 1.05564815531274e-98  | 0.442704075751859  |         |      | 0.558 | 0.156 |
| 1.88211509610709e-94  | 10                 | CYB5R3  | DZ 1 |       |       |
| 1.09686833176721e-98  | 0.371009084516329  |         |      | 0.959 | 0.688 |
| 1.95560654870776e-94  | 10                 | RHOA    | DZ 1 |       |       |
| 1.17472543954376e-98  | 0.41395185072334   | 0.661   |      | 0.234 |       |
| 2.09441798616257e-94  | 10                 | EXOSC8  | DZ 1 |       |       |
| 1.5391777167506e-98   | 0.468851507995542  |         |      | 0.517 | 0.129 |
| 2.74419995119465e-94  | 10                 | CUL3    | DZ 1 |       |       |
| 2.0873949266738e-98   | -1.10620608295658  |         |      | 0.079 | 0.275 |
| 3.72161641476672e-94  | 10                 | GPR183  | DZ 1 |       |       |
| 2.6494331143909e-98   | 0.414698035176825  |         |      | 0.788 | 0.362 |
| 4.72367429964753e-94  | 10                 | NONO    | DZ 1 |       |       |
| 2.89153037895517e-98  | 0.407287315189737  |         |      | 0.378 | 0.073 |
| 5.15530951263916e-94  | 10                 | SEPT11  | DZ 1 |       |       |
| 3.05157953149251e-98  | 0.416414927814567  |         |      | 0.837 | 0.379 |
| 5.44066114669799e-94  | 10                 | SYPL1   | DZ 1 |       |       |
| 3.27275450271212e-98  | -0.984912482871882 |         |      | 0.091 | 0.258 |
| 5.83499400288543e-94  | 10                 | FCMR    | DZ 1 |       |       |
| 3.64399321554386e-98  | 0.399068522088634  |         |      | 0.404 | 0.08  |

|                      |                   |          |      |       |       |
|----------------------|-------------------|----------|------|-------|-------|
| 6.49687550399315e-94 | 10                | CSE1L    | DZ 1 |       |       |
| 3.70684891987694e-98 | 0.468919272996455 |          |      | 0.445 | 0.101 |
| 6.6089409392486e-94  | 10                | TRAC     | DZ 1 |       |       |
| 4.83992671363865e-98 | 0.35033150329235  | 0.974    |      | 0.728 |       |
| 8.62910533774635e-94 | 10                | HSPA8    | DZ 1 |       |       |
| 4.92753848003746e-98 | 0.373530979146112 |          |      | 0.925 | 0.567 |
| 8.78530835605878e-94 | 10                | COPE     | DZ 1 |       |       |
| 5.23456335172471e-98 | 0.414768467091634 |          |      | 0.507 | 0.132 |
| 9.33270299978998e-94 | 10                | POP7     | DZ 1 |       |       |
| 5.78451514833062e-98 | 0.532318759816952 |          |      | 0.301 | 0.044 |
| 1.03132120579587e-93 | 10                | SERPINA9 | DZ 1 |       |       |
| 6.17705023703593e-98 | 0.426715275319608 |          |      | 0.768 | 0.335 |
| 1.10130628676114e-93 | 10                | POLR2K   | DZ 1 |       |       |
| 1.39555954815747e-97 | 0.443211664585895 |          |      | 0.524 | 0.137 |
| 2.48814311840995e-93 | 10                | AKR7A2   | DZ 1 |       |       |
| 1.69755433574073e-97 | 0.530333882676044 |          |      | 0.598 | 0.172 |
| 3.02656962519215e-93 | 10                | P2RX5    | DZ 1 |       |       |
| 1.87985514451906e-97 | 0.410423678597483 |          |      | 0.624 | 0.221 |
| 3.35159373716303e-93 | 10                | MTHFD2   | DZ 1 |       |       |
| 2.19415834876538e-97 | 0.442716397546678 |          |      | 0.732 | 0.288 |
| 3.91196492001379e-93 | 10                | HNRNPH3  | DZ 1 |       |       |
| 2.67940142927481e-97 | 0.390308807652778 |          |      | 0.85  | 0.427 |
| 4.77710480825405e-93 | 10                | AURKAIP1 | DZ 1 |       |       |
| 3.32426285053208e-97 | 0.409611595674318 |          |      | 0.414 | 0.083 |
| 5.92682823621364e-93 | 10                | DERA     | DZ 1 |       |       |
| 5.16180320770113e-97 | 0.472886139483817 |          |      | 0.547 | 0.16  |
| 9.20297893901034e-93 | 10                | CTCF     | DZ 1 |       |       |
| 8.11586582539739e-97 | 0.401520832130731 |          |      | 0.346 | 0.063 |
| 1.4469777180101e-92  | 10                | ATPAF1   | DZ 1 |       |       |
| 8.30268052273163e-97 | 0.439080484984875 |          |      | 0.442 | 0.099 |
| 1.48028491039782e-92 | 10                | PTS      | DZ 1 |       |       |
| 1.34527762009335e-96 | 0.441263375383722 |          |      | 0.36  | 0.065 |
| 2.39849546886443e-92 | 10                | PAG1     | DZ 1 |       |       |
| 3.07823735356274e-96 | 0.374855965576124 |          |      | 0.942 | 0.616 |
| 5.48818937766701e-92 | 10                | ATP5P0   | DZ 1 |       |       |
| 5.97466947718946e-96 | 0.422488101718652 |          |      | 0.558 | 0.149 |
| 1.06522382108811e-91 | 10                | BRD7     | DZ 1 |       |       |
| 8.53644026333982e-96 | 0.376994636667551 |          |      | 0.947 | 0.603 |
| 1.52196193455086e-91 | 10                | UQCR10   | DZ 1 |       |       |
| 8.72593097604466e-96 | 0.401552557301786 |          |      | 0.665 | 0.246 |
| 1.555746233719e-91   | 10                | NAA50    | DZ 1 |       |       |
| 1.29232905391564e-95 | 0.465667185909056 |          |      | 0.51  | 0.129 |
| 2.3040934702262e-91  | 10                | IN080C   | DZ 1 |       |       |
| 1.49531773905746e-95 | 0.434022363619675 |          |      | 0.695 | 0.267 |
| 2.66600199696555e-91 | 10                | BABAM1   | DZ 1 |       |       |
| 1.51275585279401e-95 | 0.444436048780143 |          |      | 0.718 | 0.274 |
| 2.69709240994644e-91 | 10                | RRAS2    | DZ 1 |       |       |
| 4.69488874362249e-95 | 0.434662589089033 |          |      | 0.285 | 0.034 |
| 8.37051714100453e-91 | 10                | AURKA    | DZ 1 |       |       |
| 4.73266976578314e-95 | 0.340361080169457 |          |      | 0.932 | 0.605 |

|                      |                   |         |      |       |       |
|----------------------|-------------------|---------|------|-------|-------|
| 8.43787692541476e-91 | 10                | SERBP1  | DZ 1 |       |       |
| 6.39907815918362e-95 | 0.44900771917163  |         |      | 0.341 | 0.065 |
| 1.14089164500085e-90 | 10                | DOK3    | DZ 1 |       |       |
| 7.46506310829555e-95 | 0.435735199230837 |         |      | 0.257 | 0.027 |
| 1.33094610157801e-90 | 10                | CENPE   | DZ 1 |       |       |
| 8.6846999048391e-95  | 0.402058910072974 |         |      | 0.43  | 0.09  |
| 1.54839514603376e-90 | 10                | EXOSC9  | DZ 1 |       |       |
| 1.04483563421211e-94 | 0.359498336363671 |         |      | 0.934 | 0.591 |
| 1.86283745223678e-90 | 10                | TRIR    | DZ 1 |       |       |
| 1.18637058545728e-94 | 0.411221821734188 |         |      | 0.364 | 0.065 |
| 2.11518011681179e-90 | 10                | CUX1    | DZ 1 |       |       |
| 1.5227676428729e-94  | 0.449476865241149 |         |      | 0.682 | 0.235 |
| 2.7149424304781e-90  | 10                | PPP2R5C | DZ 1 |       |       |
| 2.1710014451195e-94  | 0.311083418261338 |         |      | 0.917 | 0.595 |
| 3.87067847650355e-90 | 10                | PPDPF   | DZ 1 |       |       |
| 2.19277326582397e-94 | 0.38592408950991  | 0.841   |      | 0.416 |       |
| 3.90949545563756e-90 | 10                | KTN1    | DZ 1 |       |       |
| 2.31889508885649e-94 | 0.476667191981282 |         |      | 0.45  | 0.106 |
| 4.13435805392223e-90 | 10                | BRWD1   | DZ 1 |       |       |
| 2.43831682644762e-94 | 0.40063932265135  | 0.886   |      | 0.511 |       |
| 4.34727506987347e-90 | 10                | SELENOT | DZ 1 |       |       |
| 3.63746996993155e-94 | 0.4567549025488   | 0.853   |      | 0.443 |       |
| 6.48524520939096e-90 | 10                | CAPZA1  | DZ 1 |       |       |
| 4.4848113667523e-94  | 0.371851960738719 |         |      | 0.887 | 0.497 |
| 7.99597018578268e-90 | 10                | PSMD8   | DZ 1 |       |       |
| 5.64368528453701e-94 | 0.426413572919265 |         |      | 0.369 | 0.069 |
| 1.0062126493801e-89  | 10                | MYO1E   | DZ 1 |       |       |
| 6.3521219188547e-94  | 0.342067437010035 |         |      | 0.283 | 0.039 |
| 1.13251981691261e-89 | 10                | PARP2   | DZ 1 |       |       |
| 6.36305832089459e-94 | 0.379244732084925 |         |      | 0.875 | 0.48  |
| 1.1344696680323e-89  | 10                | THRAP3  | DZ 1 |       |       |
| 9.02247528130681e-94 | 0.429395692755082 |         |      | 0.463 | 0.107 |
| 1.60861711790419e-89 | 10                | CBFB    | DZ 1 |       |       |
| 1.33898738692168e-93 | 0.385976807675097 |         |      | 0.763 | 0.335 |
| 2.38728061214267e-89 | 10                | CYC1    | DZ 1 |       |       |
| 1.65753648264876e-93 | 0.407417115854063 |         |      | 0.367 | 0.072 |
| 2.95522179491447e-89 | 10                | LRWD1   | DZ 1 |       |       |
| 2.18502742299178e-93 | 0.401956562385389 |         |      | 0.871 | 0.456 |
| 3.89568539245204e-89 | 10                | MTDH    | DZ 1 |       |       |
| 2.20677127169936e-93 | -1.07480394253559 |         |      | 0.209 | 0.386 |
| 3.93445250031279e-89 | 10                | PDCD4   | DZ 1 |       |       |
| 2.45165287443335e-93 | 0.37486742514197  | 0.344   |      | 0.058 |       |
| 4.37105190982721e-89 | 10                | RHN01   | DZ 1 |       |       |
| 2.94283420541116e-93 | 0.435176133017609 |         |      | 0.668 | 0.248 |
| 5.24677910482755e-89 | 10                | ATXN10  | DZ 1 |       |       |
| 6.00593539076721e-93 | 0.392453675204004 |         |      | 0.407 | 0.083 |
| 1.07079822081989e-88 | 10                | MLH1    | DZ 1 |       |       |
| 6.27241113896816e-93 | 0.510858923953167 |         |      | 0.394 | 0.093 |
| 1.11830818196663e-88 | 10                | ALDH2   | DZ 1 |       |       |
| 1.17107284139008e-92 | 0.374876834160776 |         |      | 0.845 | 0.406 |

|                      |                    |         |      |       |       |
|----------------------|--------------------|---------|------|-------|-------|
| 2.08790576891437e-88 | 10                 | FAM49B  | DZ 1 |       |       |
| 2.31983319381621e-92 | -0.479990286500809 |         |      | 0.999 | 0.999 |
| 4.13603060125492e-88 | 10                 | RPS19   | DZ 1 |       |       |
| 2.68251151145166e-92 | 0.368013293828979  |         |      | 0.247 | 0.032 |
| 4.78264977376717e-88 | 10                 | TOX     | DZ 1 |       |       |
| 2.73113541887791e-92 | 0.426104947648118  |         |      | 0.643 | 0.23  |
| 4.86934133831742e-88 | 10                 | ETFA    | DZ 1 |       |       |
| 3.09023714266941e-92 | 0.504962534101653  |         |      | 0.98  | 0.856 |
| 5.50958380166529e-88 | 10                 | UBB     | DZ 1 |       |       |
| 3.11076890601717e-92 | 0.424609345167136  |         |      | 0.543 | 0.158 |
| 5.54618988253801e-88 | 10                 | COMMD7  | DZ 1 |       |       |
| 4.0251012453343e-92  | 0.38821634244289   | 0.459   |      | 0.111 |       |
| 7.17635301030653e-88 | 10                 | GMPS    | DZ 1 |       |       |
| 5.76806168347569e-92 | 0.312579035429844  |         |      | 0.223 | 0.025 |
| 1.02838771754688e-87 | 10                 | SMC04   | DZ 1 |       |       |
| 8.02572229136864e-92 | 0.418640849030362  |         |      | 0.788 | 0.351 |
| 1.43090602732811e-87 | 10                 | TERF2IP | DZ 1 |       |       |
| 1.49322364572828e-91 | 0.331447830279204  |         |      | 0.981 | 0.8   |
| 2.66226843796895e-87 | 10                 | HINT1   | DZ 1 |       |       |
| 1.97210678264807e-91 | 0.331922366586215  |         |      | 0.94  | 0.609 |
| 3.51606918278325e-87 | 10                 | ACTR3   | DZ 1 |       |       |
| 2.46747131788183e-91 | 0.391698176837274  |         |      | 0.382 | 0.08  |
| 4.39925461265151e-87 | 10                 | SFXN1   | DZ 1 |       |       |
| 2.54189432378823e-91 | 0.419867861172754  |         |      | 0.453 | 0.107 |
| 4.53194338988204e-87 | 10                 | ELP6    | DZ 1 |       |       |
| 3.39705858383986e-91 | 0.368120001574121  |         |      | 0.886 | 0.502 |
| 6.05661574912809e-87 | 10                 | DNAJC8  | DZ 1 |       |       |
| 3.89489420636327e-91 | 0.420617283958192  |         |      | 0.509 | 0.139 |
| 6.94420688052508e-87 | 10                 | PBRM1   | DZ 1 |       |       |
| 4.76972278050428e-91 | 0.355235738871555  |         |      | 0.964 | 0.698 |
| 8.50393874536108e-87 | 10                 | COX7A2  | DZ 1 |       |       |
| 5.36032436023133e-91 | 0.340496657491809  |         |      | 0.159 | 0.014 |
| 9.55692230185644e-87 | 10                 | TUBB2B  | DZ 1 |       |       |
| 5.44565421158923e-91 | 0.422484021759815  |         |      | 0.6   | 0.196 |
| 9.70905689384243e-87 | 10                 | CISD2   | DZ 1 |       |       |
| 8.16795013356026e-91 | 0.398947689260041  |         |      | 0.86  | 0.455 |
| 1.45626382931246e-86 | 10                 | PRDX5   | DZ 1 |       |       |
| 1.53884864687864e-90 | 0.411249708347009  |         |      | 0.67  | 0.25  |
| 2.74361325251994e-86 | 10                 | MRPL18  | DZ 1 |       |       |
| 1.79697941198232e-90 | 0.41576717691916   | 0.493   |      | 0.133 |       |
| 3.20383459362328e-86 | 10                 | FLOT1   | DZ 1 |       |       |
| 1.95362604801542e-90 | 0.35815072140261   | 0.937   |      | 0.644 |       |
| 3.48311988100669e-86 | 10                 | ATP5F1A | DZ 1 |       |       |
| 2.61049058741289e-90 | 0.39667683000938   | 0.415   |      | 0.089 |       |
| 4.65424366829844e-86 | 10                 | RMDN1   | DZ 1 |       |       |
| 2.97572447078588e-90 | 0.39637740640684   | 0.546   |      | 0.159 |       |
| 5.30541915896415e-86 | 10                 | THOC3   | DZ 1 |       |       |
| 6.1199784454362e-90  | 0.349833541274803  |         |      | 0.844 | 0.417 |
| 1.09113095703682e-85 | 10                 | SLIRP   | DZ 1 |       |       |
| 8.30948293431632e-90 | -0.669901774866328 |         |      | 0.992 | 0.991 |

|                      |                    |           |      |       |       |
|----------------------|--------------------|-----------|------|-------|-------|
| 1.48149771235926e-85 | 10                 | RPL30     | DZ 1 |       |       |
| 8.79943886359557e-90 | 0.413274682858566  |           |      | 0.521 | 0.141 |
| 1.56885195499045e-85 | 10                 | MZT1      | DZ 1 |       |       |
| 3.08186245432562e-89 | 0.376094652715519  |           |      | 0.816 | 0.393 |
| 5.49465256981715e-85 | 10                 | BANF1     | DZ 1 |       |       |
| 3.12723426430504e-89 | 0.338633126202134  |           |      | 0.262 | 0.035 |
| 5.57554596982945e-85 | 10                 | TTF2      | DZ 1 |       |       |
| 3.82315504697745e-89 | 0.400166151166715  |           |      | 0.79  | 0.339 |
| 6.81630313325609e-85 | 10                 | DBNL      | DZ 1 |       |       |
| 4.50680532934236e-89 | 0.390085459459593  |           |      | 0.978 | 0.77  |
| 8.0351832216845e-85  | 10                 | ARHGDIB   | DZ 1 |       |       |
| 6.65988913733268e-89 | 0.435199477408474  |           |      | 0.48  | 0.116 |
| 1.18739163429504e-84 | 10                 | RABGAP1L  | DZ 1 |       |       |
| 7.60217499416878e-89 | 0.396737286698716  |           |      | 0.754 | 0.319 |
| 1.35539177971035e-84 | 10                 | BAX       | DZ 1 |       |       |
| 7.91769424824743e-89 | -1.02242633530028  |           |      | 0.963 | 0.934 |
| 1.41164570752003e-84 | 10                 | BTG1      | DZ 1 |       |       |
| 1.40430396123654e-88 | 0.30167687199048   | 0.262     |      | 0.03  |       |
| 2.50373353248863e-84 | 10                 | RNASEH2A  | DZ 1 |       |       |
| 2.01430848070502e-88 | 0.308385344182801  |           |      | 0.194 | 0.019 |
| 3.59131059024898e-84 | 10                 | BUB1      | DZ 1 |       |       |
| 3.05976285826386e-88 | 0.358425827606626  |           |      | 0.769 | 0.34  |
| 5.45525119999864e-84 | 10                 | KPNB1     | DZ 1 |       |       |
| 3.60897450625896e-88 | 0.43706599141335   | 0.591     |      | 0.182 |       |
| 6.4344406472091e-84  | 10                 | USP34     | DZ 1 |       |       |
| 3.92292223435778e-88 | 0.369806194915636  |           |      | 0.319 | 0.049 |
| 6.99417805163648e-84 | 10                 | TOPBP1    | DZ 1 |       |       |
| 5.20617518155171e-88 | 0.340295435180802  |           |      | 0.951 | 0.65  |
| 9.28208973118855e-84 | 10                 | UBL5      | DZ 1 |       |       |
| 5.96473893056635e-88 | -0.978790030922395 |           |      | 0.089 | 0.254 |
| 1.06345330393067e-83 | 10                 | TNFRSF13B | DZ 1 |       |       |
| 6.20561014693491e-88 | 0.459365992775692  |           |      | 0.608 | 0.22  |
| 1.10639823309702e-83 | 10                 | CHCHD10   | DZ 1 |       |       |
| 6.6548449423595e-88  | -1.06089517964947  |           |      | 0.242 | 0.351 |
| 1.18649230477328e-83 | 10                 | TRAF3IP3  | DZ 1 |       |       |
| 7.9868106417291e-88  | 0.345300410842433  |           |      | 0.923 | 0.573 |
| 1.42396846931388e-83 | 10                 | NDUFB2    | DZ 1 |       |       |
| 1.57009075346081e-87 | 0.416850256112765  |           |      | 0.425 | 0.096 |
| 2.79931480434528e-83 | 10                 | IMMP1L    | DZ 1 |       |       |
| 1.97977439756423e-87 | 0.34194648203833   | 0.772     |      | 0.359 |       |
| 3.52973977341726e-83 | 10                 | ARHGDIA   | DZ 1 |       |       |
| 2.311374346122e-87   | 0.411277457419951  |           |      | 0.528 | 0.144 |
| 4.12094932170092e-83 | 10                 | MFAP1     | DZ 1 |       |       |
| 3.65200405802501e-87 | 0.386560592732104  |           |      | 0.763 | 0.331 |
| 6.51115803505279e-83 | 10                 | POLR2J    | DZ 1 |       |       |
| 9.39968352573162e-87 | 0.37944564705879   | 0.383     |      | 0.077 |       |
| 1.67586957580269e-82 | 10                 | FAF1      | DZ 1 |       |       |
| 3.08259981578088e-86 | 0.316678410714884  |           |      | 0.234 | 0.026 |
| 5.49596721155573e-82 | 10                 | RAPGEF5   | DZ 1 |       |       |
| 3.66663884185146e-86 | 0.400468000339874  |           |      | 0.702 | 0.283 |

|                      |                   |           |      |       |       |
|----------------------|-------------------|-----------|------|-------|-------|
| 6.53725039113697e-82 | 10                | MRPL57    | DZ 1 |       |       |
| 4.29999813645086e-86 | 0.360076695275102 |           |      | 0.777 | 0.351 |
| 7.66646667747824e-82 | 10                | PCMT1     | DZ 1 |       |       |
| 5.16427548612908e-86 | 0.469334290996226 |           |      | 0.34  | 0.068 |
| 9.20738676421953e-82 | 10                | LM02      | DZ 1 |       |       |
| 8.51464438548675e-86 | 0.396764378473762 |           |      | 0.421 | 0.094 |
| 1.51807594748843e-81 | 10                | HMGXB4    | DZ 1 |       |       |
| 1.01069292902454e-85 | 0.396102086877321 |           |      | 0.566 | 0.175 |
| 1.80196442315785e-81 | 10                | CHRAC1    | DZ 1 |       |       |
| 1.21820104499502e-85 | 0.425168890008393 |           |      | 0.537 | 0.16  |
| 2.17193064312162e-81 | 10                | BLOC1S6   | DZ 1 |       |       |
| 1.25208204419803e-85 | 0.415637221108667 |           |      | 0.558 | 0.174 |
| 2.23233707660067e-81 | 10                | KIF20B    | DZ 1 |       |       |
| 1.34183925754177e-85 | 0.314127651063295 |           |      | 0.911 | 0.583 |
| 2.39236521227121e-81 | 10                | HNRNPU    | DZ 1 |       |       |
| 1.39504513432127e-85 | 0.361981496221687 |           |      | 0.36  | 0.074 |
| 2.48722596998139e-81 | 10                | THOP1     | DZ 1 |       |       |
| 1.51083475033608e-85 | 0.388211327850344 |           |      | 0.663 | 0.246 |
| 2.69366727637419e-81 | 10                | UBE2V2    | DZ 1 |       |       |
| 2.37916975376013e-85 | -1.18504821660927 |           |      | 0.182 | 0.32  |
| 4.24182175397893e-81 | 10                | CD69      | DZ 1 |       |       |
| 2.62222008621594e-85 | 0.375418363528748 |           |      | 0.848 | 0.409 |
| 4.67515619171441e-81 | 10                | GABARAPL2 | DZ 1 |       |       |
| 3.51203488261132e-85 | 0.345616919812633 |           |      | 0.814 | 0.389 |
| 6.26160699220773e-81 | 10                | MDH2      | DZ 1 |       |       |
| 5.11168915701681e-85 | 0.393067615892652 |           |      | 0.542 | 0.172 |
| 9.11363059804527e-81 | 10                | LRRRC59   | DZ 1 |       |       |
| 2.11574937734512e-84 | 0.409747198606994 |           |      | 0.257 | 0.041 |
| 3.77216956486862e-80 | 10                | LRRK1     | DZ 1 |       |       |
| 2.26575337214059e-84 | 0.442111251663827 |           |      | 0.436 | 0.096 |
| 4.03961168718946e-80 | 10                | E2F5      | DZ 1 |       |       |
| 2.52682575203631e-84 | 0.381537796649597 |           |      | 0.479 | 0.124 |
| 4.50507763330553e-80 | 10                | ACAA2     | DZ 1 |       |       |
| 2.85439058355707e-84 | -0.78101485140088 |           |      | 0.996 | 0.985 |
| 5.0890929714239e-80  | 10                | TMSB10    | DZ 1 |       |       |
| 3.0332934630225e-84  | 0.384355294819466 |           |      | 0.676 | 0.249 |
| 5.40805891522281e-80 | 10                | THOC7     | DZ 1 |       |       |
| 3.20429883032103e-84 | 0.379122102291751 |           |      | 0.474 | 0.125 |
| 5.71294438457936e-80 | 10                | APIP      | DZ 1 |       |       |
| 5.08273030165893e-84 | 0.40930622563044  | 0.721     |      | 0.302 |       |
| 9.06199985482771e-80 | 10                | NDUFAF3   | DZ 1 |       |       |
| 6.63869795719372e-84 | 0.38044719671341  | 0.567     |      | 0.172 |       |
| 1.18361345878807e-79 | 10                | SPTSSA    | DZ 1 |       |       |
| 7.23371909406314e-84 | 0.383072236676654 |           |      | 0.506 | 0.143 |
| 1.28969977728052e-79 | 10                | ACTN4     | DZ 1 |       |       |
| 8.91614154056983e-84 | 0.344841544630374 |           |      | 0.801 | 0.404 |
| 1.58965887526819e-79 | 10                | IDI1      | DZ 1 |       |       |
| 1.01079543109317e-83 | 0.388277685609772 |           |      | 0.605 | 0.216 |
| 1.80214717409602e-79 | 10                | HIKESHI   | DZ 1 |       |       |
| 1.30079577642352e-83 | 0.404356998704422 |           |      | 0.591 | 0.201 |

|                      |                   |          |      |       |       |
|----------------------|-------------------|----------|------|-------|-------|
| 2.31918878978549e-79 | 10                | FAM192A  | DZ 1 |       |       |
| 3.38823412735326e-83 | 0.472254844265285 |          |      | 0.475 | 0.118 |
| 6.04088262565812e-79 | 10                | STIM2    | DZ 1 |       |       |
| 3.5280654066277e-83  | 0.340882802606179 |          |      | 0.268 | 0.035 |
| 6.29018781347652e-79 | 10                | REC8     | DZ 1 |       |       |
| 4.36014769597627e-83 | 0.367549825796238 |          |      | 0.352 | 0.073 |
| 7.77370732715609e-79 | 10                | PDZD11   | DZ 1 |       |       |
| 4.75815366533893e-83 | 0.415713906803746 |          |      | 0.756 | 0.316 |
| 8.48331216993279e-79 | 10                | CCM2     | DZ 1 |       |       |
| 5.99386620000848e-83 | 0.357468342594866 |          |      | 0.742 | 0.32  |
| 1.06864640479951e-78 | 10                | NDUFS7   | DZ 1 |       |       |
| 1.07047839140495e-82 | 0.380978591881103 |          |      | 0.46  | 0.111 |
| 1.90855592403589e-78 | 10                | NFATC2IP | DZ 1 |       |       |
| 1.28430950638191e-82 | 0.358791973317584 |          |      | 0.825 | 0.398 |
| 2.2897954189283e-78  | 10                | MOB1A    | DZ 1 |       |       |
| 1.56570068761716e-82 | 0.364826511918239 |          |      | 0.787 | 0.367 |
| 2.79148775595263e-78 | 10                | SRSF11   | DZ 1 |       |       |
| 1.69405701773137e-82 | 0.361099083763035 |          |      | 0.562 | 0.178 |
| 3.02033425691326e-78 | 10                | CHCHD3   | DZ 1 |       |       |
| 1.73770470351725e-82 | 0.427061984433729 |          |      | 0.768 | 0.324 |
| 3.0981537159009e-78  | 10                | SPIB     | DZ 1 |       |       |
| 1.93080013003245e-82 | 0.312432994818392 |          |      | 0.909 | 0.565 |
| 3.44242355183486e-78 | 10                | NDUFB11  | DZ 1 |       |       |
| 2.53638568625071e-82 | 0.358583250471578 |          |      | 0.735 | 0.319 |
| 4.52212204001638e-78 | 10                | EIF3A    | DZ 1 |       |       |
| 3.05178685142264e-82 | 0.418088492904901 |          |      | 0.47  | 0.129 |
| 5.44103077740142e-78 | 10                | COR01B   | DZ 1 |       |       |
| 3.31465798428517e-82 | 0.323029178466602 |          |      | 0.863 | 0.464 |
| 5.90970372018203e-78 | 10                | FUS      | DZ 1 |       |       |
| 3.36713156965872e-82 | -1.18397038926001 |          |      | 0.402 | 0.497 |
| 6.00325887554453e-78 | 10                | FXD5     | DZ 1 |       |       |
| 1.15718550068125e-81 | 0.370838674742413 |          |      | 0.673 | 0.261 |
| 2.0631460291646e-77  | 10                | SEPT2    | DZ 1 |       |       |
| 1.62766008886421e-81 | 0.369091615586999 |          |      | 0.568 | 0.185 |
| 2.90195517243599e-77 | 10                | UQCC2    | DZ 1 |       |       |
| 2.83111910881e-81    | 0.373726834991577 |          |      | 0.783 | 0.368 |
| 5.04760225909734e-77 | 10                | NDUFC2   | DZ 1 |       |       |
| 2.93886157881289e-81 | 0.369563966310284 |          |      | 0.394 | 0.094 |
| 5.23969630886551e-77 | 10                | NABP2    | DZ 1 |       |       |
| 3.74809248969272e-81 | 0.511962545041593 |          |      | 0.369 | 0.075 |
| 6.68247409987316e-77 | 10                | SH3TC1   | DZ 1 |       |       |
| 4.01693209803258e-81 | 0.423685553473074 |          |      | 0.424 | 0.093 |
| 7.16178823758228e-77 | 10                | SORL1    | DZ 1 |       |       |
| 4.85902668506461e-81 | 0.341939734780589 |          |      | 0.68  | 0.268 |
| 8.66315867680169e-77 | 10                | PSMD14   | DZ 1 |       |       |
| 1.07792522947043e-80 | 0.388521219783495 |          |      | 0.352 | 0.064 |
| 1.92183289162284e-76 | 10                | NUCB2    | DZ 1 |       |       |
| 1.15539214101761e-80 | 0.418724461251098 |          |      | 0.611 | 0.218 |
| 2.0599486482203e-76  | 10                | SEPT1    | DZ 1 |       |       |
| 1.95154299389978e-80 | 0.379673235108597 |          |      | 0.442 | 0.11  |



|                      |                    |               |       |       |
|----------------------|--------------------|---------------|-------|-------|
| 3.47940600382392e-76 | 10                 | DYNLT1 DZ 1   |       |       |
| 2.32598934277909e-80 | 0.347482150221703  |               | 0.778 | 0.366 |
| 4.14700639924084e-76 | 10                 | VDAC2 DZ 1    |       |       |
| 3.16998702190869e-80 | 0.339459406018215  |               | 0.809 | 0.388 |
| 5.65176986136099e-76 | 10                 | UQCRFS1 DZ 1  |       |       |
| 3.74987780817752e-80 | 0.359409134613529  |               | 0.348 | 0.073 |
| 6.68565714419969e-76 | 10                 | MTHFD1 DZ 1   |       |       |
| 4.67808497735395e-80 | 0.491966506450584  |               | 0.114 | 0.008 |
| 8.34055770612436e-76 | 10                 | IGLL1 DZ 1    |       |       |
| 1.00386617866245e-79 | 0.39379409016218   | 0.486         | 0.123 |       |
| 1.78979300993728e-75 | 10                 | MPST DZ 1     |       |       |
| 1.0920950746412e-79  | 0.30207283771391   | 0.908         | 0.544 |       |
| 1.94709630857779e-75 | 10                 | SNU13 DZ 1    |       |       |
| 1.76336750890648e-79 | 0.330096130660265  |               | 0.798 | 0.372 |
| 3.14390793162936e-75 | 10                 | SNRPC DZ 1    |       |       |
| 2.12313922077709e-79 | 0.326080196508475  |               | 0.263 | 0.037 |
| 3.78534491672347e-75 | 10                 | SASS6 DZ 1    |       |       |
| 4.80684415824803e-79 | 0.401078918758718  |               | 0.73  | 0.323 |
| 8.57012244974042e-75 | 10                 | COX14 DZ 1    |       |       |
| 6.9770200909566e-79  | 0.312519856120825  |               | 0.901 | 0.545 |
| 1.24393291201665e-74 | 10                 | PGK1 DZ 1     |       |       |
| 8.16297299070901e-79 | 0.371941201797124  |               | 0.613 | 0.213 |
| 1.45537645451351e-74 | 10                 | SREK1 DZ 1    |       |       |
| 8.49012204012725e-79 | 0.304215950823382  |               | 0.239 | 0.027 |
| 1.51370385853429e-74 | 10                 | MMS22L DZ 1   |       |       |
| 8.98126386441168e-79 | 0.345319649450801  |               | 0.734 | 0.324 |
| 1.60126953438596e-74 | 10                 | BUD31 DZ 1    |       |       |
| 1.02889046244372e-78 | 0.364025516745947  |               | 0.377 | 0.089 |
| 1.83440880549091e-74 | 10                 | ECI1 DZ 1     |       |       |
| 1.450683388784e-78   | -0.793239754409606 |               | 0.058 | 0.2   |
| 2.58642341386299e-74 | 10                 | CLEC2B DZ 1   |       |       |
| 1.97694977122967e-78 | 0.329534959567433  |               | 0.7   | 0.29  |
| 3.52470374712538e-74 | 10                 | GLRX3 DZ 1    |       |       |
| 2.43408092807153e-78 | 0.343385365671325  |               | 0.356 | 0.074 |
| 4.33972288665873e-74 | 10                 | GSTZ1 DZ 1    |       |       |
| 2.73234355056515e-78 | 0.358234891780919  |               | 0.614 | 0.216 |
| 4.8714953163026e-74  | 10                 | ATG3 DZ 1     |       |       |
| 3.07179944806487e-78 | -0.900317583208127 |               | 0.152 | 0.283 |
| 5.47671123595485e-74 | 10                 | IFITM2 DZ 1   |       |       |
| 1.23774591869091e-77 | 0.375552472238085  |               | 0.539 | 0.167 |
| 2.20677719843402e-73 | 10                 | CBX1 DZ 1     |       |       |
| 1.27803403819195e-77 | -0.528790459321193 |               | 1     | 0.999 |
| 2.27860688669243e-73 | 10                 | EEF1A1 DZ 1   |       |       |
| 1.49559166215797e-77 | 0.361373719680379  |               | 0.651 | 0.242 |
| 2.66649037446145e-73 | 10                 | CYB5B DZ 1    |       |       |
| 1.67625959959193e-77 | 0.411111706621766  |               | 0.72  | 0.307 |
| 2.98860324011246e-73 | 10                 | AP3S1 DZ 1    |       |       |
| 1.96039554090474e-77 | 0.361924139649997  |               | 0.499 | 0.135 |
| 3.49518920987906e-73 | 10                 | ANKRD13A DZ 1 |       |       |
| 2.28305058439853e-77 | 0.364529277913633  |               | 0.36  | 0.072 |

|                      |                    |         |      |       |       |
|----------------------|--------------------|---------|------|-------|-------|
| 4.07045088692413e-73 | 10                 | VGLL4   | DZ 1 |       |       |
| 6.36546399311051e-77 | 0.355851537658016  |         |      | 0.663 | 0.256 |
| 1.13489857533167e-72 | 10                 | NDUFS3  | DZ 1 |       |       |
| 7.35493399905076e-77 | 0.317053844348632  |         |      | 0.192 | 0.023 |
| 1.31131118269076e-72 | 10                 | CAMK1   | DZ 1 |       |       |
| 1.03437072691247e-76 | 0.373873304661865  |         |      | 0.641 | 0.236 |
| 1.84417956901224e-72 | 10                 | KIF5B   | DZ 1 |       |       |
| 1.74946381287261e-76 | -0.590424454420428 |         |      | 0.998 | 0.996 |
| 3.11911903197057e-72 | 10                 | RPL12   | DZ 1 |       |       |
| 3.32409913901511e-76 | 0.379305918455154  |         |      | 0.392 | 0.092 |
| 5.92653635495004e-72 | 10                 | LIMS1   | DZ 1 |       |       |
| 3.84506144898821e-76 | 0.429391012139685  |         |      | 0.542 | 0.165 |
| 6.85536005740108e-72 | 10                 | PLIN3   | DZ 1 |       |       |
| 3.90172142801471e-76 | 0.490641122418491  |         |      | 0.886 | 0.522 |
| 6.95637913400742e-72 | 10                 | ISG20   | DZ 1 |       |       |
| 4.20881006331726e-76 | 0.334479193887224  |         |      | 0.722 | 0.313 |
| 7.50388746188835e-72 | 10                 | PSMG2   | DZ 1 |       |       |
| 4.24889378410403e-76 | 0.358615959047137  |         |      | 0.622 | 0.234 |
| 7.57535272767908e-72 | 10                 | TPM4    | DZ 1 |       |       |
| 5.24813269826735e-76 | 0.333004850099444  |         |      | 0.837 | 0.463 |
| 9.35689578774086e-72 | 10                 | PRELID1 | DZ 1 |       |       |
| 5.26220571016359e-76 | 0.364232548336637  |         |      | 0.501 | 0.145 |
| 9.38198656065067e-72 | 10                 | VPS25   | DZ 1 |       |       |
| 5.26319923010838e-76 | 0.374783163396473  |         |      | 0.605 | 0.206 |
| 9.38375790736022e-72 | 10                 | GNAI2   | DZ 1 |       |       |
| 5.76423587803361e-76 | 0.366441401592893  |         |      | 0.634 | 0.239 |
| 1.02770561469461e-71 | 10                 | MCTS1   | DZ 1 |       |       |
| 7.24564350193932e-76 | 0.425138942856141  |         |      | 0.388 | 0.089 |
| 1.29182577996076e-71 | 10                 | MX1     | DZ 1 |       |       |
| 7.42178434667107e-76 | 0.386070040061162  |         |      | 0.477 | 0.135 |
| 1.32322993116799e-71 | 10                 | PTEN    | DZ 1 |       |       |
| 9.2741312875415e-76  | 0.374098787461321  |         |      | 0.318 | 0.061 |
| 1.65348486725577e-71 | 10                 | ST14    | DZ 1 |       |       |
| 9.37076043619271e-76 | 0.379082859744368  |         |      | 0.473 | 0.126 |
| 1.6707128781688e-71  | 10                 | CLIC4   | DZ 1 |       |       |
| 9.58809020450657e-76 | 0.368966860429539  |         |      | 0.555 | 0.189 |
| 1.70946060256148e-71 | 10                 | LAGE3   | DZ 1 |       |       |
| 1.88851936834725e-75 | 0.337034116923263  |         |      | 0.801 | 0.405 |
| 3.36704118182631e-71 | 10                 | ELF1    | DZ 1 |       |       |
| 2.69785019087173e-75 | 0.50248611521332   | 0.325   |      | 0.062 |       |
| 4.80999710530521e-71 | 10                 | RASSF6  | DZ 1 |       |       |
| 2.98972704796235e-75 | 0.361507164651496  |         |      | 0.488 | 0.134 |
| 5.33038435381208e-71 | 10                 | C1orf35 | DZ 1 |       |       |
| 7.44583661644729e-75 | 0.327845484905549  |         |      | 0.337 | 0.068 |
| 1.32751821034639e-70 | 10                 | OXCT1   | DZ 1 |       |       |
| 9.54227219328183e-75 | 0.302665157451026  |         |      | 0.837 | 0.436 |
| 1.70129170934022e-70 | 10                 | CSNK2B  | DZ 1 |       |       |
| 1.0229360282305e-74  | 0.356092366917997  |         |      | 0.549 | 0.175 |
| 1.82379264473215e-70 | 10                 | TECR    | DZ 1 |       |       |
| 1.44270080968756e-74 | 0.339663423986452  |         |      | 0.483 | 0.135 |

|                      |                    |          |      |       |       |
|----------------------|--------------------|----------|------|-------|-------|
| 2.57219127359195e-70 | 10                 | SF3A2    | DZ 1 |       |       |
| 1.6597546062745e-74  | 0.373850206594696  |          |      | 0.695 | 0.269 |
| 2.95917648752681e-70 | 10                 | LAT2     | DZ 1 |       |       |
| 1.68935762323487e-74 | 0.375003303334662  |          |      | 0.828 | 0.415 |
| 3.01195570646545e-70 | 10                 | DNAJA1   | DZ 1 |       |       |
| 1.69347643151453e-74 | 0.399314385028232  |          |      | 0.508 | 0.135 |
| 3.01929912974725e-70 | 10                 | RBM38    | DZ 1 |       |       |
| 1.96908117195525e-74 | 0.367152386331071  |          |      | 0.793 | 0.394 |
| 3.51067482147901e-70 | 10                 | LSM10    | DZ 1 |       |       |
| 4.70297471259982e-74 | 0.363187529357804  |          |      | 0.512 | 0.154 |
| 8.38493361509423e-70 | 10                 | COX11    | DZ 1 |       |       |
| 4.87391112390719e-74 | 0.307437159653056  |          |      | 0.212 | 0.028 |
| 8.68969614281412e-70 | 10                 | CTPS2    | DZ 1 |       |       |
| 5.35715886002394e-74 | -0.423614126352395 |          |      | 1     | 1     |
| 9.55127853153668e-70 | 10                 | RPL21    | DZ 1 |       |       |
| 5.40933667543424e-74 | 0.37346495500995   | 0.623    |      | 0.237 |       |
| 9.64430635863171e-70 | 10                 | MRPL16   | DZ 1 |       |       |
| 6.97044541010437e-74 | 0.303890700067613  |          |      | 0.885 | 0.505 |
| 1.24276071216751e-69 | 10                 | ATP5PB   | DZ 1 |       |       |
| 7.73156441436133e-74 | 0.356762592157082  |          |      | 0.449 | 0.123 |
| 1.37846061943648e-69 | 10                 | NUP37    | DZ 1 |       |       |
| 9.99951520662581e-74 | 0.398895589658307  |          |      | 0.981 | 0.852 |
| 1.78281356618932e-69 | 10                 | CD79B    | DZ 1 |       |       |
| 1.05848410696651e-73 | 0.31802891194733   | 0.258    |      | 0.039 |       |
| 1.88717131431059e-69 | 10                 | CCDC102A | DZ 1 |       |       |
| 1.20325503442242e-73 | 0.306634374830728  |          |      | 0.945 | 0.659 |
| 2.14528340087174e-69 | 10                 | GDI2     | DZ 1 |       |       |
| 1.2683014219673e-73  | 0.359356878311932  |          |      | 0.482 | 0.14  |
| 2.26125460522551e-69 | 10                 | HTATSF1  | DZ 1 |       |       |
| 1.29839518587775e-73 | 0.379413811663784  |          |      | 0.575 | 0.173 |
| 2.31490877690144e-69 | 10                 | CDC47L   | DZ 1 |       |       |
| 1.38033822662072e-73 | 0.368265290137114  |          |      | 0.516 | 0.166 |
| 2.46100502424209e-69 | 10                 | LAP3     | DZ 1 |       |       |
| 1.87461891075712e-73 | 0.354839134759926  |          |      | 0.421 | 0.106 |
| 3.34225805598887e-69 | 10                 | MAZ      | DZ 1 |       |       |
| 2.12707872476475e-73 | 0.301466489286827  |          |      | 0.276 | 0.049 |
| 3.79236865838307e-69 | 10                 | CTPS1    | DZ 1 |       |       |
| 4.77682521973306e-73 | -0.881218909110009 |          |      | 0.976 | 0.96  |
| 8.51660168426207e-69 | 10                 | MT-ND2   | DZ 1 |       |       |
| 5.17948792002376e-73 | 0.342345360246665  |          |      | 0.65  | 0.251 |
| 9.23450901261035e-69 | 10                 | SYNCRIP  | DZ 1 |       |       |
| 5.64527595689334e-73 | 0.373027783291368  |          |      | 0.402 | 0.097 |
| 1.00649625035451e-68 | 10                 | TCF3     | DZ 1 |       |       |
| 6.62067729010735e-73 | 0.351865282147501  |          |      | 0.234 | 0.04  |
| 1.18040055405324e-68 | 10                 | CCDC144A | DZ 1 |       |       |
| 7.21986842627442e-73 | 0.327689715086578  |          |      | 0.652 | 0.255 |
| 1.28723034172047e-68 | 10                 | FIBP     | DZ 1 |       |       |
| 9.18645085555823e-73 | 0.304750228577317  |          |      | 0.681 | 0.275 |
| 1.63785232303748e-68 | 10                 | MRPL14   | DZ 1 |       |       |
| 1.15689965026749e-72 | 0.402640460456699  |          |      | 0.428 | 0.107 |

|                      |                    |          |      |       |       |
|----------------------|--------------------|----------|------|-------|-------|
| 2.06263638646191e-68 | 10                 | TBC1D1   | DZ 1 |       |       |
| 1.41684779916104e-72 | 0.3033559429506    |          |      | 0.823 | 0.407 |
| 2.52609794112422e-68 | 10                 | NDUFA2   | DZ 1 |       |       |
| 1.45515766779003e-72 | 0.301534797409854  |          |      | 0.833 | 0.432 |
| 2.59440060590284e-68 | 10                 | NDUFB10  | DZ 1 |       |       |
| 1.76941484957712e-72 | 0.312085169381036  |          |      | 0.867 | 0.483 |
| 3.15468973531105e-68 | 10                 | ARGLU1   | DZ 1 |       |       |
| 1.88892017167234e-72 | 0.376481079363073  |          |      | 0.457 | 0.12  |
| 3.36775577407462e-68 | 10                 | C16orf87 | DZ 1 |       |       |
| 3.54389793046046e-72 | 0.329706639566772  |          |      | 0.262 | 0.045 |
| 6.31841562021796e-68 | 10                 | SPDL1    | DZ 1 |       |       |
| 4.31478055467161e-72 | 0.360821188053166  |          |      | 0.653 | 0.246 |
| 7.69282225092402e-68 | 10                 | ILK      | DZ 1 |       |       |
| 6.70556855573247e-72 | 0.303858257543812  |          |      | 0.211 | 0.024 |
| 1.19553581780154e-67 | 10                 | FGD6     | DZ 1 |       |       |
| 1.07298877694447e-71 | 0.343154788724802  |          |      | 0.509 | 0.161 |
| 1.9130316904143e-67  | 10                 | CLTB     | DZ 1 |       |       |
| 4.65953610009188e-71 | 0.332671468611449  |          |      | 0.667 | 0.272 |
| 8.30748691285382e-67 | 10                 | SRSF4    | DZ 1 |       |       |
| 8.17215312772567e-71 | 0.358253138915167  |          |      | 0.394 | 0.095 |
| 1.45701318114221e-66 | 10                 | ACSF3    | DZ 1 |       |       |
| 1.66801324135811e-70 | 0.328030139525979  |          |      | 0.426 | 0.117 |
| 2.97390080801737e-66 | 10                 | RCC1     | DZ 1 |       |       |
| 1.76487519747272e-70 | 0.333382634156278  |          |      | 0.591 | 0.203 |
| 3.14659598957411e-66 | 10                 | PIH1D1   | DZ 1 |       |       |
| 1.78242136552642e-70 | 0.357471666436492  |          |      | 0.521 | 0.164 |
| 3.17787905259705e-66 | 10                 | ZNF428   | DZ 1 |       |       |
| 1.86089453672428e-70 | 0.336715514600825  |          |      | 0.527 | 0.17  |
| 3.31778886952571e-66 | 10                 | DHX15    | DZ 1 |       |       |
| 2.04002036133851e-70 | 0.321741417076836  |          |      | 0.31  | 0.058 |
| 3.63715230223043e-66 | 10                 | PPP5C    | DZ 1 |       |       |
| 2.69968806417609e-70 | -0.422603898179092 |          |      | 0.999 | 0.999 |
| 4.81327384961955e-66 | 10                 | RPS8     | DZ 1 |       |       |
| 2.72286811372886e-70 | 0.352463074394665  |          |      | 0.505 | 0.162 |
| 4.85460155996718e-66 | 10                 | DRG1     | DZ 1 |       |       |
| 4.53522748732115e-70 | 0.33385755581845   | 0.625    |      | 0.232 |       |
| 8.08585708714488e-66 | 10                 | PFKL     | DZ 1 |       |       |
| 7.33401178740651e-70 | 0.363561507660094  |          |      | 0.353 | 0.076 |
| 1.30758096157671e-65 | 10                 | TMEM131L | DZ 1 |       |       |
| 8.63160457885049e-70 | 0.301207959176961  |          |      | 0.762 | 0.353 |
| 1.53892878036325e-65 | 10                 | PSMA5    | DZ 1 |       |       |
| 9.00787286427984e-70 | 0.332980234649839  |          |      | 0.85  | 0.472 |
| 1.60601365297245e-65 | 10                 | RPS27L   | DZ 1 |       |       |
| 2.04648785130805e-69 | 0.332902734744859  |          |      | 0.755 | 0.352 |
| 3.64868319009712e-65 | 10                 | PDIA3    | DZ 1 |       |       |
| 3.44233133035901e-69 | 0.315650445641772  |          |      | 0.604 | 0.226 |
| 6.13733252889709e-65 | 10                 | MRPS16   | DZ 1 |       |       |
| 3.52471353632285e-69 | 0.342963742627967  |          |      | 0.574 | 0.207 |
| 6.28421176391e-65    | 10                 | NDUFV1   | DZ 1 |       |       |
| 5.18014303435859e-69 | 0.330065108532737  |          |      | 0.541 | 0.178 |

|                      |                    |              |       |       |
|----------------------|--------------------|--------------|-------|-------|
| 9.23567701595793e-65 | 10                 | MRPS11 DZ 1  |       |       |
| 6.27926065475452e-69 | 0.347711259376217  |              | 0.573 | 0.196 |
| 1.11952938213618e-64 | 10                 | PRPF38A DZ 1 |       |       |
| 7.18380924994311e-69 | 0.311710625694296  |              | 0.326 | 0.065 |
| 1.28080135117236e-64 | 10                 | LRRC42 DZ 1  |       |       |
| 9.01086529752965e-69 | 0.307754687762175  |              | 0.349 | 0.081 |
| 1.60654717389656e-64 | 10                 | UBE2M DZ 1   |       |       |
| 9.46930171324711e-69 | 0.387687228325227  |              | 0.581 | 0.212 |
| 1.68828180245483e-64 | 10                 | SIAH2 DZ 1   |       |       |
| 1.38865187377987e-68 | 0.302574518587179  |              | 0.599 | 0.241 |
| 2.47582742576212e-64 | 10                 | RRP7A DZ 1   |       |       |
| 1.40213783710868e-68 | 0.333414451667143  |              | 0.396 | 0.102 |
| 2.49987154978106e-64 | 10                 | CNP DZ 1     |       |       |
| 1.44692122070318e-68 | 0.359082129666339  |              | 0.585 | 0.216 |
| 2.57971584439171e-64 | 10                 | SDHA DZ 1    |       |       |
| 1.60851290279522e-68 | 0.338997830617886  |              | 0.591 | 0.206 |
| 2.8678176543936e-64  | 10                 | WDR33 DZ 1   |       |       |
| 2.18542938148848e-68 | 0.336773642733511  |              | 0.433 | 0.114 |
| 3.89640204425581e-64 | 10                 | NTAN1 DZ 1   |       |       |
| 2.18890601404963e-68 | 0.334494966413963  |              | 0.632 | 0.248 |
| 3.90260053244909e-64 | 10                 | BAZ1A DZ 1   |       |       |
| 4.25357063387501e-68 | -0.48046914507202  |              | 0.999 | 0.998 |
| 7.58369108313576e-64 | 10                 | RPS14 DZ 1   |       |       |
| 7.26643786988641e-68 | 0.368049208291529  |              | 0.644 | 0.252 |
| 1.29553320782205e-63 | 10                 | RBM6 DZ 1    |       |       |
| 7.26707703641567e-68 | 0.326051114518088  |              | 0.386 | 0.093 |
| 1.29564716482255e-63 | 10                 | ASH2L DZ 1   |       |       |
| 8.55391228679807e-68 | 0.352632717602132  |              | 0.995 | 0.989 |
| 1.52507702161323e-63 | 10                 | CD74 DZ 1    |       |       |
| 9.24339823922803e-68 | 0.312846841932541  |              | 0.669 | 0.282 |
| 1.64800547207197e-63 | 10                 | ILF3 DZ 1    |       |       |
| 1.38928630938661e-67 | 0.329687190644698  |              | 0.44  | 0.129 |
| 2.47695856100539e-63 | 10                 | ITGB3BP DZ 1 |       |       |
| 1.72593286375436e-67 | -0.565791903484278 |              | 0.993 | 0.985 |
| 3.07716570278764e-63 | 10                 | RPL27 DZ 1   |       |       |
| 1.87066308475758e-67 | 0.310851610027234  |              | 0.709 | 0.313 |
| 3.3352052138143e-63  | 10                 | MRPS36 DZ 1  |       |       |
| 2.22811580375924e-67 | 0.336514760619343  |              | 0.602 | 0.216 |
| 3.97250766652235e-63 | 10                 | HDDC2 DZ 1   |       |       |
| 2.26303735198166e-67 | 0.31177213008011   | 0.323        | 0.065 |       |
| 4.0347692948481e-63  | 10                 | ZNF672 DZ 1  |       |       |
| 2.27548047579013e-67 | -1.24254136178247  |              | 0.413 | 0.457 |
| 4.05695414028622e-63 | 10                 | JUNB DZ 1    |       |       |
| 3.44271064664932e-67 | -1.00151584654991  |              | 0.391 | 0.45  |
| 6.13800881191108e-63 | 10                 | PNRC1 DZ 1   |       |       |
| 4.64876128891697e-67 | 0.322902544392605  |              | 0.551 | 0.179 |
| 8.28827650201006e-63 | 10                 | NDUFA8 DZ 1  |       |       |
| 4.68053695808144e-67 | 0.320284672287391  |              | 0.621 | 0.251 |
| 8.3449293425634e-63  | 10                 | CD2BP2 DZ 1  |       |       |
| 4.72800697507791e-67 | 0.308082274810015  |              | 0.707 | 0.3   |

|                      |                   |          |      |       |       |
|----------------------|-------------------|----------|------|-------|-------|
| 8.4295636358664e-63  | 10                | ZNF207   | DZ 1 |       |       |
| 5.98359602718789e-67 | 0.36145827002837  |          |      | 0.55  | 0.211 |
| 1.06681533568733e-62 | 10                | MRPL4    | DZ 1 |       |       |
| 6.37407218587582e-67 | 0.33304050199775  |          |      | 0.377 | 0.09  |
| 1.1364333300198e-62  | 10                | PPP1R35  | DZ 1 |       |       |
| 7.27610440774926e-67 | 0.369800574931405 |          |      | 0.546 | 0.164 |
| 1.29725665485762e-62 | 10                | SYK      | DZ 1 |       |       |
| 8.52622569625082e-67 | 0.340707118389893 |          |      | 0.278 | 0.055 |
| 1.52014077938456e-62 | 10                | NINJ1    | DZ 1 |       |       |
| 1.04414559003442e-66 | 0.314436429401684 |          |      | 0.684 | 0.29  |
| 1.86160717247237e-62 | 10                | COPS6    | DZ 1 |       |       |
| 1.10550866281927e-66 | 0.3210316033085   |          |      | 0.483 | 0.145 |
| 1.97101139494047e-62 | 10                | DDB2     | DZ 1 |       |       |
| 1.28105691706378e-66 | 0.307170320059057 |          |      | 0.312 | 0.072 |
| 2.28399637743302e-62 | 10                | KEAP1    | DZ 1 |       |       |
| 1.76573260677537e-66 | 0.316766590955485 |          |      | 0.47  | 0.137 |
| 3.1481246646198e-62  | 10                | RTN3     | DZ 1 |       |       |
| 2.07594172623092e-66 | 0.313892815726102 |          |      | 0.282 | 0.047 |
| 3.70119650369712e-62 | 10                | BCL6     | DZ 1 |       |       |
| 2.29362544051246e-66 | 0.317644742894011 |          |      | 0.61  | 0.233 |
| 4.08930479788966e-62 | 10                | VDAC3    | DZ 1 |       |       |
| 2.6417401494824e-66  | 0.337353725796304 |          |      | 0.738 | 0.324 |
| 4.70995851251217e-62 | 10                | NDUFC1   | DZ 1 |       |       |
| 2.7153660322128e-66  | 0.304401849034828 |          |      | 0.666 | 0.275 |
| 4.8412260988322e-62  | 10                | TXN2     | DZ 1 |       |       |
| 2.90913608591866e-66 | 0.366872784252352 |          |      | 0.578 | 0.196 |
| 5.18669872758437e-62 | 10                | GLRX     | DZ 1 |       |       |
| 5.19453890493604e-66 | 0.342072118357773 |          |      | 0.602 | 0.206 |
| 9.26134341361046e-62 | 10                | LY86     | DZ 1 |       |       |
| 6.62807151171157e-66 | 0.319956885082604 |          |      | 0.578 | 0.21  |
| 1.18171886982305e-61 | 10                | PSMD9    | DZ 1 |       |       |
| 7.87420013539507e-66 | 0.487214724502177 |          |      | 0.646 | 0.256 |
| 1.40389114213959e-61 | 10                | PIM1     | DZ 1 |       |       |
| 8.29763865826217e-66 | 0.336846853761919 |          |      | 0.346 | 0.08  |
| 1.47938599638156e-61 | 10                | DESI2    | DZ 1 |       |       |
| 1.297511147926e-65   | 0.33743656537607  |          |      | 0.443 | 0.126 |
| 2.31333262563726e-61 | 10                | GTF2E2   | DZ 1 |       |       |
| 1.58449116630829e-65 | 0.305943896285406 |          |      | 0.47  | 0.142 |
| 2.82498930041104e-61 | 10                | MPC1     | DZ 1 |       |       |
| 1.63799677231027e-65 | 0.371503097913338 |          |      | 0.595 | 0.229 |
| 2.92038444535197e-61 | 10                | RGS1     | DZ 1 |       |       |
| 1.79183687077286e-65 | 0.352735109742069 |          |      | 0.388 | 0.094 |
| 3.19466595690093e-61 | 10                | OTULIN   | DZ 1 |       |       |
| 2.87407651204224e-65 | 0.326510635193952 |          |      | 0.507 | 0.166 |
| 5.12419101332012e-61 | 10                | SLC25A11 | DZ 1 |       |       |
| 3.14939238713904e-65 | 0.342267918804705 |          |      | 0.619 | 0.242 |
| 5.6150516870302e-61  | 10                | C12orf57 | DZ 1 |       |       |
| 3.34052314768285e-65 | 0.449862647380049 |          |      | 0.407 | 0.119 |
| 5.95581872000375e-61 | 10                | NFATC1   | DZ 1 |       |       |
| 3.43496891671727e-65 | 0.341263951620174 |          |      | 0.387 | 0.099 |

|                      |                    |          |      |       |       |
|----------------------|--------------------|----------|------|-------|-------|
| 6.12420608161522e-61 | 10                 | PHF6     | DZ 1 |       |       |
| 5.49558413133285e-65 | 0.322264738641818  |          |      | 0.491 | 0.153 |
| 9.79807694775333e-61 | 10                 | SRRT     | DZ 1 |       |       |
| 6.41035383715596e-65 | 0.336638466463403  |          |      | 0.581 | 0.196 |
| 1.14290198562654e-60 | 10                 | TCEAL8   | DZ 1 |       |       |
| 1.30522886234963e-64 | 0.335836113011116  |          |      | 0.354 | 0.082 |
| 2.32709253868316e-60 | 10                 | RITA1    | DZ 1 |       |       |
| 1.61197803980202e-64 | 0.315346862761695  |          |      | 0.5   | 0.158 |
| 2.87399564716303e-60 | 10                 | MTX1     | DZ 1 |       |       |
| 2.66658732681821e-64 | 0.309391207581433  |          |      | 0.319 | 0.072 |
| 4.75425854498419e-60 | 10                 | BLMH     | DZ 1 |       |       |
| 5.60483471309474e-64 | 0.324478472103646  |          |      | 0.322 | 0.07  |
| 9.99285980997661e-60 | 10                 | FAM45A   | DZ 1 |       |       |
| 7.18026401940012e-64 | 0.323406491716335  |          |      | 0.602 | 0.215 |
| 1.28016927201885e-59 | 10                 | IAH1     | DZ 1 |       |       |
| 7.39296180301477e-64 | 0.308482571370436  |          |      | 0.689 | 0.287 |
| 1.3180911598595e-59  | 10                 | POLE4    | DZ 1 |       |       |
| 9.07202960908545e-64 | 0.350872878107982  |          |      | 0.331 | 0.066 |
| 1.61745215900384e-59 | 10                 | CDC25B   | DZ 1 |       |       |
| 9.17652786446564e-64 | 0.35852413012428   | 0.491    |      | 0.152 |       |
| 1.63608315295558e-59 | 10                 | LYPLAL1  | DZ 1 |       |       |
| 1.14223050673232e-63 | -0.909027897563009 |          |      | 0.369 | 0.44  |
| 2.03648277045306e-59 | 10                 | IL2RG    | DZ 1 |       |       |
| 1.33598769461753e-63 | 0.305369199852583  |          |      | 0.682 | 0.304 |
| 2.3819324607336e-59  | 10                 | WDR1     | DZ 1 |       |       |
| 1.72542604308458e-63 | 0.411512377841784  |          |      | 0.283 | 0.056 |
| 3.0762620922155e-59  | 10                 | HOPX     | DZ 1 |       |       |
| 2.53945489967386e-63 | 0.318191728740818  |          |      | 0.454 | 0.13  |
| 4.52759414062853e-59 | 10                 | MTHFS    | DZ 1 |       |       |
| 3.93496921357153e-63 | 0.304403525359222  |          |      | 0.705 | 0.325 |
| 7.01565661087668e-59 | 10                 | HSD17B10 | DZ 1 |       |       |
| 4.11408968411782e-63 | 0.320485726135559  |          |      | 0.499 | 0.158 |
| 7.33501049781365e-59 | 10                 | TARDBP   | DZ 1 |       |       |
| 4.39664069833892e-63 | 0.336905864778743  |          |      | 0.619 | 0.227 |
| 7.83877070106847e-59 | 10                 | PTRHD1   | DZ 1 |       |       |
| 4.42050784591473e-63 | 0.326991343363073  |          |      | 0.395 | 0.101 |
| 7.88132343848138e-59 | 10                 | TRNAU1AP | DZ 1 |       |       |
| 5.20600283847971e-63 | 0.302619072426266  |          |      | 0.381 | 0.093 |
| 9.28178246072547e-59 | 10                 | HACD3    | DZ 1 |       |       |
| 5.76097406008388e-63 | -0.819651026384772 |          |      | 0.911 | 0.867 |
| 1.02712406517236e-58 | 10                 | CD52     | DZ 1 |       |       |
| 7.21004270347144e-63 | 0.408937883177654  |          |      | 0.801 | 0.383 |
| 1.28547851360192e-58 | 10                 | CSTB     | DZ 1 |       |       |
| 4.89982698423619e-62 | 0.310354235933626  |          |      | 0.403 | 0.101 |
| 8.7359015301947e-58  | 10                 | TMEM14A  | DZ 1 |       |       |
| 8.34483372870441e-62 | 0.318248152091943  |          |      | 0.442 | 0.131 |
| 1.48780040549071e-57 | 10                 | CISD1    | DZ 1 |       |       |
| 1.64921885699923e-61 | 0.322543317874487  |          |      | 0.518 | 0.175 |
| 2.94039230014393e-57 | 10                 | COPS8    | DZ 1 |       |       |
| 1.77442075743133e-61 | 0.314679312037698  |          |      | 0.466 | 0.14  |

|                      |                   |          |       |              |       |    |
|----------------------|-------------------|----------|-------|--------------|-------|----|
| 3.16361476842432e-57 | 10                | ARPC1A   | DZ 1  |              |       |    |
| 1.95146738438909e-61 | 0.307716601260806 |          |       | 0.404        | 0.113 |    |
| 3.47927119962732e-57 | 10                | NUP62    | DZ 1  |              |       |    |
| 2.03081158998763e-61 | 0.300921739273132 |          |       | 0.171        | 0.022 |    |
| 3.62073398378895e-57 | 10                | HTR3A    | DZ 1  |              |       |    |
| 2.07288831953892e-61 | 0.328479321211834 |          |       | 0.426        | 0.127 |    |
| 3.69575258490595e-57 | 10                | OSBPL9   | DZ 1  |              |       |    |
| 2.87145398668715e-61 | -1.49320984854321 |          |       | 0.18         | 0.29  |    |
| 5.11951531286451e-57 | 10                | MIR155HG | DZ 1  |              |       |    |
| 5.61471058786723e-61 | 0.31069729396489  | 0.563    |       | 0.205        |       |    |
| 1.00104675071085e-56 | 10                | IFI27L2  | DZ 1  |              |       |    |
| 5.62818320130433e-61 | -0.78987409135384 |          |       | 0.961        | 0.916 |    |
| 1.00344878296055e-56 | 10                | PFDN5    | DZ 1  |              |       |    |
| 1.10419100911933e-60 | 0.317547237303719 |          |       | 0.478        | 0.155 |    |
| 1.96866215015885e-56 | 10                | TOR3A    | DZ 1  |              |       |    |
| 1.2767754629097e-60  | 0.301456905809298 |          |       | 0.329        | 0.075 |    |
| 2.27636297282171e-56 | 10                | PARN     | DZ 1  |              |       |    |
| 1.52507e-60          | 0.3414124         | 0.367    | 0.092 | 2.719048e-56 |       | 10 |
| AC084033.3           | DZ 1              |          |       |              |       |    |
| 1.599264e-60         | 0.4072743         | 0.372    | 0.092 | 2.851328e-56 |       | 10 |
| CDKN2D               | DZ 1              |          |       |              |       |    |
| 2.288683e-60         | 0.3142692         | 0.338    | 0.084 | 4.080492e-56 |       | 10 |
| FAM208B              | DZ 1              |          |       |              |       |    |
| 3.138261e-60         | -0.7170486        | 0.081    | 0.187 | 5.595205e-56 |       | 10 |
| PLPP5                | DZ 1              |          |       |              |       |    |
| 3.277484e-60         | 0.3002076         | 0.572    | 0.213 | 5.843427e-56 |       | 10 |
| NUDT5                | DZ 1              |          |       |              |       |    |
| 4.289159e-60         | 0.3057224         | 0.65     | 0.257 | 7.647142e-56 |       | 10 |
| SEPT9                | DZ 1              |          |       |              |       |    |
| 4.603308e-60         | -0.9235784        | 0.179    | 0.271 | 8.207238e-56 |       | 10 |
| JUN                  | DZ 1              |          |       |              |       |    |
| 7.736058e-60         | 0.3479814         | 0.562    | 0.198 | 1.379262e-55 |       | 10 |
| EHD1                 | DZ 1              |          |       |              |       |    |
| 1.596866e-59         | -0.4253625        | 0.997    | 0.998 | 2.847053e-55 |       | 10 |
| RPS28                | DZ 1              |          |       |              |       |    |
| 1.997122e-59         | 0.3022209         | 0.594    | 0.228 | 3.560668e-55 |       | 10 |
| PRKRA                | DZ 1              |          |       |              |       |    |
| 2.475081e-59         | 0.3481681         | 0.341    | 0.086 | 4.412821e-55 |       | 10 |
| RNGTT                | DZ 1              |          |       |              |       |    |
| 3.958174e-59         | 0.3225346         | 0.509    | 0.178 | 7.057029e-55 |       | 10 |
| RUVBL2               | DZ 1              |          |       |              |       |    |
| 6.748797e-59         | 0.3008888         | 0.53     | 0.183 | 1.203243e-54 |       | 10 |
| PAFAH1B1             | DZ 1              |          |       |              |       |    |
| 1.12979e-58          | 0.3229298         | 0.448    | 0.136 | 2.014303e-54 |       | 10 |
| P2RY8                | DZ 1              |          |       |              |       |    |
| 1.188006e-58         | 0.3340271         | 0.568    | 0.216 | 2.118095e-54 |       | 10 |
| ADI1                 | DZ 1              |          |       |              |       |    |
| 5.135696e-58         | 0.3375869         | 0.556    | 0.212 | 9.156432e-54 |       | 10 |
| HSPH1                | DZ 1              |          |       |              |       |    |
| 5.153777e-58         | 0.3107604         | 0.53     | 0.188 | 9.188668e-54 |       | 10 |



|              |               |            |       |              |              |       |
|--------------|---------------|------------|-------|--------------|--------------|-------|
| 5.715548e-58 | NUDCD2 DZ 1   | 0.3248465  | 0.338 | 0.08         | 1.019025e-53 | 10    |
| 5.900955e-58 | MAP4K4 DZ 1   | 0.3014807  | 0.412 | 0.112        | 1.052081e-53 | 10    |
| 6.96063e-58  | BAD DZ 1      | -0.4193372 | 0.997 | 0.997        | 1.241011e-53 | 10    |
| 8.479078e-58 | RPL7 DZ 1     | -0.9199386 | 0.082 | 0.201        | 1.511735e-53 | 10    |
| 1.221464e-57 | ACP5 DZ 1     | 0.325214   | 0.297 | 2.177748e-53 | 10           | 0.656 |
| 4.861102e-57 | CALR DZ 1     | 0.3242228  | 0.761 | 0.387        | 8.666858e-53 | 10    |
| 5.719707e-57 | NDUFS5 DZ 1   | 0.3463414  | 0.502 | 0.191        | 1.019767e-52 | 10    |
| 9.635481e-57 | RELB DZ 1     | 0.3315724  | 0.537 | 0.204        | 1.71791e-52  | 10    |
| 4.506433e-56 | PHAX DZ 1     | 0.3475012  | 0.672 | 0.317        | 8.03452e-52  | 10    |
| 5.296825e-56 | HNRNPH1 DZ 1  | -0.8136077 | 0.232 | 0.308        | 9.44371e-52  | 10    |
| 9.158032e-56 | ARHGAP24 DZ 1 | -0.499516  | 0.993 | 0.992        | 1.632786e-51 | 10    |
| 1.827211e-55 | RPL36 DZ 1    | 0.3017089  | 0.855 | 0.49         | 3.257734e-51 | 10    |
| 6.867255e-55 | PSMB9 DZ 1    | -0.6036707 | 0.042 | 0.153        | 1.224363e-50 | 10    |
| 2.381788e-54 | CELF2 DZ 1    | 0.3037617  | 0.498 | 0.164        | 4.246491e-50 | 10    |
| 7.896672e-54 | EHMT1 DZ 1    | 0.3558713  | 0.841 | 0.486        | 1.407898e-49 | 10    |
| 3.05413e-53  | SAT1 DZ 1     | 0.3368093  | 0.401 | 0.104        | 5.445209e-49 | 10    |
| 5.836538e-53 | TNFRSF17 DZ 1 | -0.7671165 | 0.212 | 0.281        | 1.040596e-48 | 10    |
| 6.159564e-53 | RNASET2 DZ 1  | 0.3072857  | 0.337 | 0.08         | 1.098189e-48 | 10    |
| 1.220603e-52 | VEZT DZ 1     | 0.3403061  | 0.245 | 0.052        | 2.176213e-48 | 10    |
| 1.470468e-52 | RGS16 DZ 1    | -0.7849454 | 0.058 | 0.176        | 2.621698e-48 | 10    |
| 1.725753e-52 | TNFRSF18 DZ 1 | 0.3117785  | 0.418 | 0.117        | 3.076845e-48 | 10    |
| 2.161156e-52 | CCNG2 DZ 1    | 0.3034654  | 0.367 | 0.099        | 3.853125e-48 | 10    |
| 2.781729e-52 | CITED2 DZ 1   | -0.7914216 | 0.163 | 0.24         | 4.959544e-48 | 10    |
| 3.008998e-52 | CD55 DZ 1     | 0.3212008  | 0.583 | 0.222        | 5.364743e-48 | 10    |
| 3.74177e-52  | ZCCHC7 DZ 1   | 0.7766087  | 0.205 | 0.07         | 6.671201e-48 | 10    |

|              |                  |            |       |       |              |    |
|--------------|------------------|------------|-------|-------|--------------|----|
| 4.981073e-52 | IGHA2<br>DZ 1    | -0.8825607 | 0.911 | 0.853 | 8.880755e-48 | 10 |
| 2.233714e-51 | SH3BGRL3<br>DZ 1 | 0.3721185  | 0.511 | 0.193 | 3.982488e-47 | 10 |
| 2.929894e-51 | UBALD2<br>DZ 1   | -0.7861907 | 0.237 | 0.332 | 5.223707e-47 | 10 |
| 3.562087e-51 | TRBC2<br>DZ 1    | 0.4565544  | 0.809 | 0.478 | 6.350845e-47 | 10 |
| 3.468433e-50 | LTB<br>DZ 1      | 0.3149385  | 0.444 | 0.138 | 6.183868e-46 | 10 |
| 4.241646e-50 | ALOX5<br>DZ 1    | -0.8607745 | 0.215 | 0.28  | 7.56243e-46  | 10 |
| 1.576094e-49 | ADAM28<br>DZ 1   | -0.6268043 | 0.073 | 0.175 | 2.810019e-45 | 10 |
| 1.034932e-48 | BCL2<br>DZ 1     | 0.3193214  | 0.343 | 0.091 | 1.84518e-44  | 10 |
| 5.014213e-48 | SYVN1<br>DZ 1    | -0.7401424 | 0.047 | 0.162 | 8.93984e-44  | 10 |
| 6.282047e-48 | LMNA<br>DZ 1     | 0.3140465  | 0.346 | 0.092 | 1.120026e-43 | 10 |
| 1.276982e-47 | SYNC<br>DZ 1     | -1.108273  | 0.521 | 0.572 | 2.276732e-43 | 10 |
| 1.754692e-47 | VIM<br>DZ 1      | -1.255959  | 0.205 | 0.265 | 3.128441e-43 | 10 |
| 2.945714e-46 | S100A4<br>DZ 1   | -0.7962568 | 0.152 | 0.24  | 5.251914e-42 | 10 |
| 4.272179e-46 | CAPG<br>DZ 1     | -0.4054924 | 0.997 | 0.997 | 7.616869e-42 | 10 |
| 4.641975e-46 | RPS3A<br>DZ 1    | 0.3081702  | 0.377 | 0.116 | 8.276177e-42 | 10 |
| 1.307111e-45 | DLAT<br>DZ 1     | -0.4995896 | 0.031 | 0.115 | 2.330448e-41 | 10 |
| 1.978472e-45 | P2RY10<br>DZ 1   | -0.7319145 | 0.112 | 0.201 | 3.527418e-41 | 10 |
| 3.350957e-45 | YBX3<br>DZ 1     | -0.6197265 | 0.072 | 0.167 | 5.974421e-41 | 10 |
| 4.579397e-45 | MARCKS<br>DZ 1   | -0.5086366 | 0.99  | 0.981 | 8.164607e-41 | 10 |
| 1.254557e-44 | RPS11<br>DZ 1    | -0.3555848 | 0.999 | 0.998 | 2.236749e-40 | 10 |
| 1.031641e-43 | RPL26<br>DZ 1    | -0.9525097 | 0.393 | 0.428 | 1.839313e-39 | 10 |
| 3.833329e-43 | PLP2<br>DZ 1     | -0.6439822 | 0.046 | 0.14  | 6.834443e-39 | 10 |
| 2.5735e-42   | FCER2<br>DZ 1    | -0.4366073 | 0.993 | 0.992 | 4.588293e-38 | 10 |
| 1.236794e-41 | RPL37<br>DZ 1    | -0.6088957 | 0.065 | 0.161 | 2.20508e-37  | 10 |
| 1.34619e-41  | SLC2A3<br>DZ 1   | -0.8540744 | 0.804 | 0.75  | 2.400122e-37 | 10 |

|              |            |       |       |              |    |  |
|--------------|------------|-------|-------|--------------|----|--|
| HLA-C        | DZ 1       |       |       |              |    |  |
| 1.805795e-41 | -0.9382039 | 0.43  | 0.464 | 3.219552e-37 | 10 |  |
| CD63         | DZ 1       |       |       |              |    |  |
| 1.130679e-40 | -0.4779724 | 0.028 | 0.103 | 2.015888e-36 | 10 |  |
| RHOC         | DZ 1       |       |       |              |    |  |
| 1.547541e-40 | -0.6701204 | 0.123 | 0.198 | 2.75911e-36  | 10 |  |
| CHPT1        | DZ 1       |       |       |              |    |  |
| 7.612081e-40 | -0.6266693 | 0.117 | 0.176 | 1.357158e-35 | 10 |  |
| MARCH1       | DZ 1       |       |       |              |    |  |
| 1.586833e-39 | -0.8158085 | 0.295 | 0.328 | 2.829164e-35 | 10 |  |
| ZFP36        | DZ 1       |       |       |              |    |  |
| 4.472147e-39 | -0.8586456 | 0.408 | 0.414 | 7.973391e-35 | 10 |  |
| NPC2         | DZ 1       |       |       |              |    |  |
| 5.248483e-39 | -0.4067202 | 0.993 | 0.992 | 9.35752e-35  | 10 |  |
| RPL18        | DZ 1       |       |       |              |    |  |
| 1.184582e-38 | -0.8562266 | 0.45  | 0.445 | 2.111991e-34 | 10 |  |
| KLF6         | DZ 1       |       |       |              |    |  |
| 1.060986e-37 | -0.4691256 | 0.031 | 0.107 | 1.891631e-33 | 10 |  |
| MTSS1        | DZ 1       |       |       |              |    |  |
| 1.911473e-37 | -0.3734682 | 0.999 | 0.997 | 3.407964e-33 | 10 |  |
| RPS23        | DZ 1       |       |       |              |    |  |
| 2.465096e-37 | -0.7981925 | 0.514 | 0.501 | 4.395019e-33 | 10 |  |
| FOXP1        | DZ 1       |       |       |              |    |  |
| 1.683649e-36 | -0.4747062 | 0.045 | 0.12  | 3.001779e-32 | 10 |  |
| FCGR2B       | DZ 1       |       |       |              |    |  |
| 3.887271e-36 | -0.6347503 | 0.186 | 0.233 | 6.930615e-32 | 10 |  |
| HSD17B11     | DZ 1       |       |       |              |    |  |
| 4.273277e-35 | -0.8673917 | 0.539 | 0.502 | 7.618826e-31 | 10 |  |
| TSC22D3      | DZ 1       |       |       |              |    |  |
| 1.117145e-34 | -0.3943078 | 0.997 | 0.993 | 1.991757e-30 | 10 |  |
| RPS5         | DZ 1       |       |       |              |    |  |
| 1.248279e-34 | -0.3716636 | 0.025 | 0.1   | 2.225556e-30 | 10 |  |
| PARVB        | DZ 1       |       |       |              |    |  |
| 2.3206e-34   | -0.8138968 | 0.524 | 0.491 | 4.137398e-30 | 10 |  |
| ANKRD12      | DZ 1       |       |       |              |    |  |
| 2.507057e-33 | -0.5488487 | 0.984 | 0.965 | 4.469832e-29 | 10 |  |
| RPL38        | DZ 1       |       |       |              |    |  |
| 4.782474e-33 | -0.7838017 | 0.517 | 0.465 | 8.526674e-29 | 10 |  |
| ITM2B        | DZ 1       |       |       |              |    |  |
| 1.418518e-32 | -0.7775783 | 0.636 | 0.568 | 2.529076e-28 | 10 |  |
| SNX2         | DZ 1       |       |       |              |    |  |
| 6.115277e-32 | -0.3019106 | 0.999 | 0.998 | 1.090293e-27 | 10 |  |
| RPL19        | DZ 1       |       |       |              |    |  |
| 1.316913e-31 | -0.7969671 | 0.712 | 0.646 | 2.347924e-27 | 10 |  |
| ZFP36L1      | DZ 1       |       |       |              |    |  |
| 2.179222e-31 | -0.7736666 | 0.545 | 0.492 | 3.885334e-27 | 10 |  |
| SP100        | DZ 1       |       |       |              |    |  |
| 4.243736e-31 | -0.7100181 | 0.488 | 0.454 | 7.566157e-27 | 10 |  |
| CTSS         | DZ 1       |       |       |              |    |  |
| 2.680089e-30 | -0.7354165 | 0.533 | 0.474 | 4.778331e-26 | 10 |  |

|              |                |            |       |       |              |    |
|--------------|----------------|------------|-------|-------|--------------|----|
| 3.450714e-30 | N4BP2L2 DZ 1   | -0.5590609 | 0.14  | 0.191 | 6.152278e-26 | 10 |
| 2.126292e-29 | IFNGR1 DZ 1    | -0.7128626 | 0.425 | 0.387 | 3.790967e-25 | 10 |
| 4.676584e-29 | EVI2B DZ 1     | -0.4302878 | 0.997 | 0.984 | 8.337882e-25 | 10 |
| 7.379491e-29 | RPL29 DZ 1     | -0.6761326 | 0.3   | 0.328 | 1.315689e-24 | 10 |
| 1.081048e-28 | PTPN6 DZ 1     | -0.4256033 | 0.046 | 0.111 | 1.927401e-24 | 10 |
| 1.207236e-28 | SNX9 DZ 1      | -0.4236578 | 0.067 | 0.122 | 2.152382e-24 | 10 |
| 1.278464e-28 | IL27RA DZ 1    | -0.688391  | 0.34  | 0.336 | 2.279374e-24 | 10 |
| 2.195205e-28 | CD48 DZ 1      | -0.3024499 | 0.997 | 0.994 | 3.913832e-24 | 10 |
| 3.959602e-27 | RPS9 DZ 1      | -0.4939065 | 0.11  | 0.159 | 7.059574e-23 | 10 |
| 4.62213e-27  | TGIF1 DZ 1     | -0.3022447 | 1     | 0.999 | 8.240796e-23 | 10 |
| 1.382455e-26 | RPS6 DZ 1      | -0.6095753 | 0.205 | 0.243 | 2.46478e-22  | 10 |
| 1.510695e-26 | PHACTR1 DZ 1   | -0.4419578 | 0.066 | 0.111 | 2.693419e-22 | 10 |
| 4.37672e-26  | LINC02397 DZ 1 | -0.4469467 | 0.062 | 0.107 | 7.803253e-22 | 10 |
| 1.260569e-25 | C1orf162 DZ 1  | -0.8917454 | 0.586 | 0.496 | 2.247469e-21 | 10 |
| 2.404995e-25 | SSR4 DZ 1      | -0.4656876 | 0.994 | 0.982 | 4.287866e-21 | 10 |
| 2.89777e-25  | RPS21 DZ 1     | -0.339952  | 0.998 | 0.994 | 5.166435e-21 | 10 |
| 6.387577e-25 | RPL37A DZ 1    | -0.4201005 | 0.085 | 0.128 | 1.138841e-20 | 10 |
| 1.574029e-24 | ZEB2 DZ 1      | -0.7329771 | 0.358 | 0.337 | 2.806337e-20 | 10 |
| 1.708199e-24 | HVCN1 DZ 1     | -0.4681752 | 0.127 | 0.164 | 3.045549e-20 | 10 |
| 3.950889e-24 | TNFRSF14 DZ 1  | -0.5435303 | 0.969 | 0.933 | 7.04404e-20  | 10 |
| 5.597535e-24 | MT-ATP6 DZ 1   | -0.4486739 | 0.977 | 0.96  | 9.979845e-20 | 10 |
| 2.224103e-23 | RPL23 DZ 1     | -0.7028623 | 0.35  | 0.345 | 3.965353e-19 | 10 |
| 4.131257e-23 | CAST DZ 1      | -0.6006317 | 0.162 | 0.212 | 7.365618e-19 | 10 |
| 8.438221e-23 | MGST3 DZ 1     | -0.3040387 | 0.999 | 0.998 | 1.50445e-18  | 10 |
| 1.357833e-22 | RPL23A DZ 1    | -0.6902962 | 0.896 | 0.813 | 2.420881e-18 | 10 |

|              |            |       |       |              |    |  |
|--------------|------------|-------|-------|--------------|----|--|
| NOP53        | DZ 1       |       |       |              |    |  |
| 2.13336e-22  | -0.9385849 | 0.855 | 0.747 | 3.803567e-18 | 10 |  |
| CXCR4        | DZ 1       |       |       |              |    |  |
| 2.847814e-22 | -0.4233493 | 0.101 | 0.149 | 5.077367e-18 | 10 |  |
| MVP          | DZ 1       |       |       |              |    |  |
| 3.434611e-22 | -0.5086397 | 0.147 | 0.175 | 6.123568e-18 | 10 |  |
| ASAH1        | DZ 1       |       |       |              |    |  |
| 7.398533e-22 | -0.7626827 | 0.377 | 0.359 | 1.319084e-17 | 10 |  |
| ARID5B       | DZ 1       |       |       |              |    |  |
| 3.005879e-21 | -0.6152489 | 0.367 | 0.347 | 5.359182e-17 | 10 |  |
| LITAF        | DZ 1       |       |       |              |    |  |
| 3.246663e-21 | -0.562122  | 0.31  | 0.284 | 5.788475e-17 | 10 |  |
| SP110        | DZ 1       |       |       |              |    |  |
| 3.504936e-21 | -0.4057512 | 0.993 | 0.986 | 6.24895e-17  | 10 |  |
| RPL14        | DZ 1       |       |       |              |    |  |
| 7.910596e-21 | -0.3644578 | 0.068 | 0.106 | 1.41038e-16  | 10 |  |
| PDE4B        | DZ 1       |       |       |              |    |  |
| 1.321299e-20 | -0.373825  | 0.077 | 0.112 | 2.355745e-16 | 10 |  |
| SESN3        | DZ 1       |       |       |              |    |  |
| 1.440927e-20 | -0.6856762 | 0.348 | 0.301 | 2.569028e-16 | 10 |  |
| ZFP36L2      | DZ 1       |       |       |              |    |  |
| 4.33409e-20  | -0.6117902 | 0.417 | 0.382 | 7.72725e-16  | 10 |  |
| C19orf70     | DZ 1       |       |       |              |    |  |
| 4.464265e-20 | -0.4448045 | 0.988 | 0.973 | 7.959337e-16 | 10 |  |
| MT-ND4       | DZ 1       |       |       |              |    |  |
| 6.394491e-20 | -0.5966351 | 0.226 | 0.211 | 1.140074e-15 | 10 |  |
| LBH          | DZ 1       |       |       |              |    |  |
| 7.773755e-20 | -0.6641765 | 0.853 | 0.754 | 1.385983e-15 | 10 |  |
| MT-ND5       | DZ 1       |       |       |              |    |  |
| 1.201527e-19 | -0.464441  | 0.995 | 0.975 | 2.142203e-15 | 10 |  |
| RPL36A       | DZ 1       |       |       |              |    |  |
| 1.225802e-19 | -0.4687424 | 0.19  | 0.191 | 2.185483e-15 | 10 |  |
| S1PR4        | DZ 1       |       |       |              |    |  |
| 1.482823e-19 | -0.4157724 | 0.139 | 0.16  | 2.643726e-15 | 10 |  |
| ARHGAP15     | DZ 1       |       |       |              |    |  |
| 2.116987e-19 | -0.5363906 | 0.226 | 0.229 | 3.774376e-15 | 10 |  |
| NT5C3A       | DZ 1       |       |       |              |    |  |
| 2.963123e-19 | -0.6198576 | 0.462 | 0.387 | 5.282952e-15 | 10 |  |
| ARL6IP5      | DZ 1       |       |       |              |    |  |
| 8.453913e-19 | -0.5751186 | 0.539 | 0.443 | 1.507248e-14 | 10 |  |
| BTG2         | DZ 1       |       |       |              |    |  |
| 9.028433e-19 | -0.3826882 | 0.99  | 0.98  | 1.609679e-14 | 10 |  |
| RPL5         | DZ 1       |       |       |              |    |  |
| 3.305636e-18 | -0.5936289 | 0.379 | 0.335 | 5.893618e-14 | 10 |  |
| S100A11      | DZ 1       |       |       |              |    |  |
| 4.401719e-18 | -0.6099923 | 0.459 | 0.384 | 7.847825e-14 | 10 |  |
| PSAP         | DZ 1       |       |       |              |    |  |
| 8.085886e-18 | -0.7523831 | 0.614 | 0.52  | 1.441633e-13 | 10 |  |
| ID3          | DZ 1       |       |       |              |    |  |
| 8.178419e-18 | -0.460534  | 0.984 | 0.968 | 1.45813e-13  | 10 |  |

|              |            |       |       |              |    |  |
|--------------|------------|-------|-------|--------------|----|--|
| RPS17        | DZ 1       |       |       |              |    |  |
| 1.728019e-17 | -0.4643343 | 0.133 | 0.148 | 3.080884e-13 | 10 |  |
| ARRDC2       | DZ 1       |       |       |              |    |  |
| 3.650538e-17 | -0.5039334 | 0.243 | 0.241 | 6.508545e-13 | 10 |  |
| HLA-F        | DZ 1       |       |       |              |    |  |
| 3.908678e-17 | -0.3561387 | 0.083 | 0.118 | 6.968782e-13 | 10 |  |
| SLAMF1       | DZ 1       |       |       |              |    |  |
| 3.992001e-17 | -0.5658723 | 0.337 | 0.283 | 7.117339e-13 | 10 |  |
| PPM1K        | DZ 1       |       |       |              |    |  |
| 4.632585e-17 | -0.5354909 | 0.128 | 0.161 | 8.259436e-13 | 10 |  |
| DDIT4        | DZ 1       |       |       |              |    |  |
| 4.804811e-17 | -0.4448189 | 0.148 | 0.171 | 8.566498e-13 | 10 |  |
| PARP14       | DZ 1       |       |       |              |    |  |
| 5.849888e-17 | -0.3667496 | 0.089 | 0.121 | 1.042977e-12 | 10 |  |
| LACTB        | DZ 1       |       |       |              |    |  |
| 8.05474e-17  | -0.3580111 | 0.077 | 0.116 | 1.43608e-12  | 10 |  |
| ENTPD1       | DZ 1       |       |       |              |    |  |
| 1.008186e-16 | -0.3232596 | 0.998 | 0.993 | 1.797495e-12 | 10 |  |
| RPL35        | DZ 1       |       |       |              |    |  |
| 1.125843e-16 | -0.4714769 | 0.175 | 0.183 | 2.007265e-12 | 10 |  |
| MBP          | DZ 1       |       |       |              |    |  |
| 3.017977e-16 | -0.4798206 | 0.988 | 0.977 | 5.380752e-12 | 10 |  |
| RPS10        | DZ 1       |       |       |              |    |  |
| 3.15695e-16  | -0.6021521 | 0.37  | 0.318 | 5.628526e-12 | 10 |  |
| TUBA1A       | DZ 1       |       |       |              |    |  |
| 5.921512e-16 | -0.4090317 | 0.136 | 0.15  | 1.055746e-11 | 10 |  |
| ESYT1        | DZ 1       |       |       |              |    |  |
| 7.510616e-16 | -1.825501  | 0.735 | 0.441 | 1.339068e-11 | 10 |  |
| IGHG3        | DZ 1       |       |       |              |    |  |
| 9.032575e-16 | 0.3563886  | 0.942 | 0.747 | 1.610418e-11 | 10 |  |
| HLA-DRB1     | DZ 1       |       |       |              |    |  |
| 1.444287e-15 | -0.6195861 | 0.461 | 0.208 | 2.575018e-11 | 10 |  |
| IGHG1        | DZ 1       |       |       |              |    |  |
| 5.320513e-15 | -0.5449003 | 0.452 | 0.404 | 9.485942e-11 | 10 |  |
| SMIM14       | DZ 1       |       |       |              |    |  |
| 5.331078e-15 | -0.5798484 | 0.385 | 0.34  | 9.504779e-11 | 10 |  |
| PKIG         | DZ 1       |       |       |              |    |  |
| 6.364056e-15 | -0.7222877 | 0.565 | 0.475 | 1.134648e-10 | 10 |  |
| SQSTM1       | DZ 1       |       |       |              |    |  |
| 6.56867e-15  | -0.3662487 | 0.101 | 0.115 | 1.171128e-10 | 10 |  |
| CLN8         | DZ 1       |       |       |              |    |  |
| 7.962095e-15 | -0.549864  | 0.409 | 0.36  | 1.419562e-10 | 10 |  |
| ANXA6        | DZ 1       |       |       |              |    |  |
| 1.279859e-14 | -0.612499  | 0.109 | 0.131 | 2.281861e-10 | 10 |  |
| MYC          | DZ 1       |       |       |              |    |  |
| 3.252506e-14 | -0.5891422 | 0.831 | 0.713 | 5.798893e-10 | 10 |  |
| EIF4A2       | DZ 1       |       |       |              |    |  |
| 3.66917e-14  | -0.3279992 | 0.995 | 0.981 | 6.541763e-10 | 10 |  |
| TPT1         | DZ 1       |       |       |              |    |  |
| 8.941684e-14 | -0.4682033 | 0.182 | 0.197 | 1.594213e-09 | 10 |  |

|              |          |      |            |       |       |              |    |
|--------------|----------|------|------------|-------|-------|--------------|----|
| 2.166944e-13 | TYMP     | DZ 1 | -0.5976133 | 0.571 | 0.477 | 3.863445e-09 | 10 |
| 2.257356e-13 | ISCU     | DZ 1 | -0.7413917 | 0.552 | 0.469 | 4.024641e-09 | 10 |
| 3.389433e-13 | CD83     | DZ 1 | -0.3496143 | 0.105 | 0.124 | 6.04302e-09  | 10 |
| 1.504518e-12 | RAB13    | DZ 1 | -0.4400129 | 0.228 | 0.21  | 2.682406e-08 | 10 |
| 2.522895e-12 | FMNL1    | DZ 1 | -0.3178066 | 0.108 | 0.113 | 4.498069e-08 | 10 |
| 2.545097e-12 | PBXIP1   | DZ 1 | -0.5428915 | 0.957 | 0.844 | 4.537653e-08 | 10 |
| 3.797127e-12 | CD37     | DZ 1 | -0.3632673 | 0.163 | 0.158 | 6.769897e-08 | 10 |
| 4.699616e-12 | EVI2A    | DZ 1 | -0.5182724 | 0.311 | 0.281 | 8.378945e-08 | 10 |
| 8.363459e-12 | MT-ND4L  | DZ 1 | -0.3890476 | 0.171 | 0.157 | 1.491121e-07 | 10 |
| 9.492723e-12 | GLIPR1   | DZ 1 | -0.3319893 | 0.117 | 0.129 | 1.692458e-07 | 10 |
| 2.574374e-11 | ICAM2    | DZ 1 | -0.4810255 | 0.991 | 0.975 | 4.589852e-07 | 10 |
| 3.843692e-11 | FTH1     | DZ 1 | -0.5172059 | 0.963 | 0.915 | 6.852919e-07 | 10 |
| 3.938541e-11 | EEF1B2   | DZ 1 | -0.5334456 | 0.481 | 0.38  | 7.022024e-07 | 10 |
| 7.804386e-11 | LAPTM4A  | DZ 1 | -0.3111751 | 0.114 | 0.113 | 1.391444e-06 | 10 |
| 8.357376e-11 | HBP1     | DZ 1 | -0.3151092 | 0.118 | 0.117 | 1.490037e-06 | 10 |
| 1.372957e-10 | SAMD9    | DZ 1 | -0.4842316 | 0.354 | 0.304 | 2.447845e-06 | 10 |
| 4.695986e-10 | TMEM147  | DZ 1 | -0.3981565 | 0.213 | 0.203 | 8.372474e-06 | 10 |
| 5.294998e-10 | NDFIP1   | DZ 1 | -0.5402767 | 0.774 | 0.622 | 9.440451e-06 | 10 |
| 5.479016e-10 | ATP6V0E1 | DZ 1 | -0.5320358 | 0.874 | 0.748 | 9.768537e-06 | 10 |
| 7.505981e-10 | TOMM7    | DZ 1 | -0.4092659 | 0.251 | 0.205 | 1.338241e-05 | 10 |
| 8.051038e-10 | C16orf74 | DZ 1 | -0.432871  | 0.165 | 0.166 | 1.435419e-05 | 10 |
| 1.146249e-09 | CBX6     | DZ 1 | -0.6037121 | 0.551 | 0.469 | 2.043648e-05 | 10 |
| 1.352442e-09 | SNHG8    | DZ 1 | -0.4018843 | 0.268 | 0.205 | 2.41127e-05  | 10 |
| 1.491096e-09 | CCDC32   | DZ 1 | -0.3760335 | 0.159 | 0.144 | 2.658475e-05 | 10 |
| 3.729747e-09 | SUN2     | DZ 1 | -0.4516155 | 0.888 | 0.637 | 6.649766e-05 | 10 |

|              |                 |            |       |       |              |    |
|--------------|-----------------|------------|-------|-------|--------------|----|
| 4.071919e-09 | IGLC2 DZ 1      | -0.3349492 | 0.148 | 0.133 | 7.259824e-05 | 10 |
| 4.120626e-09 | ODF2L DZ 1      | -0.3063362 | 0.121 | 0.119 | 7.346663e-05 | 10 |
| 5.620972e-09 | LIPA DZ 1       | -0.3133088 | 0.993 | 0.981 | 0.0001002163 | 10 |
| 1.00264e-08  | RPSA DZ 1       | -0.3787051 | 0.211 | 0.193 | 0.0001787607 | 10 |
| 1.192751e-08 | ESF1 DZ 1       | -0.3437158 | 0.12  | 0.131 | 0.0002126556 | 10 |
| 1.731207e-08 | RP9 DZ 1        | -0.3023017 | 0.989 | 0.97  | 0.0003086568 | 10 |
| 1.872215e-08 | RPL22 DZ 1      | -0.3592071 | 0.215 | 0.188 | 0.0003337972 | 10 |
| 2.907059e-08 | SYTL1 DZ 1      | -0.3431754 | 0.981 | 0.958 | 0.0005182995 | 10 |
| 4.225608e-08 | MT-CYB DZ 1     | -0.5640412 | 0.72  | 0.57  | 0.0007533836 | 10 |
| 4.654297e-08 | APRT DZ 1       | -0.4489826 | 0.428 | 0.348 | 0.0008298145 | 10 |
| 5.350056e-08 | APOBEC3G DZ 1   | -0.3799285 | 0.262 | 0.217 | 0.0009538615 | 10 |
| 1.097328e-07 | CCDC50 DZ 1     | -0.435459  | 0.336 | 0.272 | 0.001956426  | 10 |
| 1.41944e-07  | TNRC6B DZ 1     | -0.3448725 | 0.197 | 0.17  | 0.002530719  | 10 |
| 1.72055e-07  | TRIM44 DZ 1     | -0.3390021 | 0.197 | 0.176 | 0.003067568  | 10 |
| 1.877766e-07 | STAT6 DZ 1      | -0.3416044 | 0.131 | 0.133 | 0.00334787   | 10 |
| 3.308483e-07 | AC016831.5 DZ 1 | -0.4079486 | 0.341 | 0.241 | 0.005898694  | 10 |
| 4.33534e-07  | RASGRP2 DZ 1    | -0.3224515 | 0.199 | 0.171 | 0.007729477  | 10 |
| 7.056404e-07 | DHRS7 DZ 1      | -0.3686436 | 0.236 | 0.202 | 0.01258086   | 10 |
| 7.141202e-07 | PTPN1 DZ 1      | -0.5892555 | 0.935 | 0.845 | 0.01273205   | 10 |
| 7.166664e-07 | HSP90AB1 DZ 1   | -0.4096058 | 0.965 | 0.897 | 0.01277744   | 10 |
| 9.363376e-07 | DDX5 DZ 1       | -0.3725518 | 0.26  | 0.209 | 0.01669396   | 10 |
| 1.094415e-06 | IDS DZ 1        | -0.3001557 | 0.163 | 0.139 | 0.01951233   | 10 |
| 1.374813e-06 | RAB29 DZ 1      | -0.5264968 | 0.884 | 0.765 | 0.02451154   | 10 |
| 2.117795e-06 | RPL17 DZ 1      | -0.3939853 | 0.297 | 0.235 | 0.03775816   | 10 |
| 2.448028e-06 | AC004687.1 DZ 1 | -0.3456106 | 0.241 | 0.192 | 0.04364589   | 10 |



|              |                   |            |       |       |            |    |
|--------------|-------------------|------------|-------|-------|------------|----|
| 2.480593e-06 | HSPB1 DZ 1        | -0.4166971 | 0.358 | 0.264 | 0.0442265  | 10 |
| 2.65937e-06  | HHEX DZ 1         | -0.3472372 | 0.228 | 0.177 | 0.04741391 | 10 |
| 3.047401e-06 | HEXA DZ 1         | -0.3410005 | 0.229 | 0.185 | 0.0543321  | 10 |
| 3.185305e-06 | SRSF8 DZ 1        | -0.3913021 | 0.293 | 0.23  | 0.05679081 | 10 |
| 3.378442e-06 | EPB41L4A-AS1 DZ 1 | -0.3530935 | 0.993 | 0.963 | 0.06023424 | 10 |
| 3.514164e-06 | EIF1 DZ 1         | -0.3406177 | 0.169 | 0.145 | 0.06265403 | 10 |
| 3.741273e-06 | TSPYL1 DZ 1       | -0.563395  | 0.403 | 0.309 | 0.06670316 | 10 |
| 4.908951e-06 | HSP90B1 DZ 1      | -0.3189622 | 0.22  | 0.178 | 0.08752168 | 10 |
| 5.800834e-06 | DNPEP DZ 1        | -0.4702654 | 0.434 | 0.326 | 0.1034231  | 10 |
| 9.092124e-06 | SMC6 DZ 1         | -0.4840134 | 0.64  | 0.487 | 0.1621035  | 10 |
| 1.183204e-05 | CYTIP DZ 1        | -0.4360886 | 0.448 | 0.33  | 0.2109534  | 10 |
| 1.186842e-05 | BTK DZ 1          | -0.3501367 | 0.963 | 0.879 | 0.211602   | 10 |
| 1.335687e-05 | MS4A1 DZ 1        | -0.359668  | 0.318 | 0.249 | 0.2381397  | 10 |
| 1.55807e-05  | DNPH1 DZ 1        | -0.3052555 | 0.2   | 0.154 | 0.2777883  | 10 |
| 1.992654e-05 | LMBRD1 DZ 1       | -0.3553229 | 0.226 | 0.189 | 0.3552702  | 10 |
| 3.995732e-05 | RNF145 DZ 1       | -0.3408713 | 0.255 | 0.183 | 0.7123991  | 10 |
| 4.296061e-05 | ANKRD44 DZ 1      | -0.3892037 | 0.444 | 0.317 | 0.7659448  | 10 |
| 5.770196e-05 | TNFRSF13C DZ 1    | -0.3968589 | 0.282 | 0.23  | 1          | 10 |
| 9.302054e-05 | TARS DZ 1         | -0.5291191 | 0.82  | 0.609 | 1          | 10 |
| 0.0001023595 | MEF2C DZ 1        | -0.4662332 | 0.612 | 0.475 | 1          | 10 |
| 0.0001611685 | RSL1D1 DZ 1       | -0.349197  | 0.301 | 0.203 | 1          | 10 |
| 0.0002077513 | PRKCB DZ 1        | -0.5027307 | 0.572 | 0.44  | 1          | 10 |
| 0.0002870032 | ANXA2 DZ 1        | -0.3222222 | 0.259 | 0.191 | 1          | 10 |
| 0.000288797  | CYTH1 DZ 1        | -0.3527322 | 0.145 | 0.125 | 1          | 10 |
| 0.000418605  | LGALS3 DZ 1       | -0.3139627 | 0.228 | 0.183 | 1          | 10 |

|          |    |   |              |            |       |       |   |    |                 |
|----------|----|---|--------------|------------|-------|-------|---|----|-----------------|
| FKBP4    | DZ | 1 | 0.0005909818 | -0.4266223 | 0.554 | 0.424 | 1 | 10 |                 |
| PPP1R15A | DZ | 1 | 0.0009107241 | -0.4184765 | 0.488 | 0.357 | 1 | 10 |                 |
| TAPBP    | DZ | 1 | 0.0009226015 | -0.4499236 | 0.397 | 0.292 | 1 | 10 |                 |
| NFKBIA   | DZ | 1 | 0.001028872  | -0.3955955 | 0.453 | 0.315 | 1 | 10 |                 |
| LTA4H    | DZ | 1 | 0.00136511   | -0.4562493 | 0.64  | 0.47  | 1 | 10 |                 |
| TNFAIP8  | DZ | 1 | 0.001519494  | -0.3351297 | 0.293 | 0.2   | 1 | 10 |                 |
| IRF1     | DZ | 1 | 0.00156351   | -0.4204417 | 0.621 | 0.401 | 1 | 10 | TXN             |
|          | DZ | 1 | 0.001755646  | -0.3750588 | 0.373 | 0.274 | 1 | 10 | MSN             |
|          | DZ | 1 | 0.001799227  | -0.3678066 | 0.936 | 0.821 | 1 | 10 |                 |
| EIF3E    | DZ | 1 | 0.001849508  | -0.3317053 | 0.257 | 0.197 | 1 | 10 |                 |
| PPP3CA   | DZ | 1 | 0.002617499  | -0.7306721 | 0.524 | 0.426 | 1 | 10 |                 |
| IGLC3    | DZ | 1 | 0.002950407  | -0.3018496 | 0.187 | 0.151 | 1 | 10 |                 |
| CEBPB    | DZ | 1 | 0.003177383  | -0.3093178 | 0.28  | 0.202 | 1 | 10 |                 |
| AP1S2    | DZ | 1 | 0.004267641  | -1.411861  | 0.264 | 0.121 | 1 | 10 |                 |
| IGHG2    | DZ | 1 | 0.007078761  | -0.3021649 | 0.297 | 0.199 | 1 | 10 |                 |
| BIN1     | DZ | 1 | 0.007097243  | -0.3280904 | 0.327 | 0.237 | 1 | 10 |                 |
| ANKRD11  | DZ | 1 | 0.008134742  | -0.3052417 | 0.295 | 0.202 | 1 | 10 |                 |
| RALGPS2  | DZ | 1 | 0.008342502  | -0.3152891 | 0.348 | 0.176 | 1 | 10 |                 |
| XBP1     | DZ | 1 | 0            | 7.494194   | 0.983 | 0.435 | 0 | 11 | IGHG3 ASC IgG   |
|          |    |   | 0            | 6.609033   | 0.683 | 0.11  | 0 | 11 | IGHG2 ASC IgG   |
|          |    |   | 0            | 6.271728   | 0.88  | 0.225 | 0 | 11 | IGHG4 ASC IgG   |
|          |    |   | 0            | 5.283512   | 0.922 | 0.196 | 0 | 11 | IGHG1 ASC IgG   |
|          |    |   | 0            | 4.769338   | 0.978 | 0.387 | 0 | 11 | JCHAIN ASC IgG  |
|          |    |   | 0            | 4.690234   | 0.995 | 0.152 | 0 | 11 | MZB1 ASC IgG    |
|          |    |   | 0            | 3.862643   | 0.993 | 0.158 | 0 | 11 | XBP1 ASC IgG    |
|          |    |   | 0            | 3.182545   | 0.459 | 0.012 | 0 | 11 | IGHGP ASC IgG   |
|          |    |   | 0            | 3.166738   | 0.993 | 0.485 | 0 | 11 | SSR4 ASC IgG    |
|          |    |   | 0            | 3.101241   | 0.985 | 0.293 | 0 | 11 | HSP90B1 ASC IgG |
|          |    |   | 0            | 2.667154   | 0.98  | 0.3   | 0 | 11 | SEC11C ASC IgG  |
|          |    |   | 0            | 2.641669   | 0.955 | 0.257 | 0 | 11 | HSPA5 ASC IgG   |
|          |    |   | 0            | 2.569728   | 0.882 | 0.031 | 0 | 11 | DERL3 ASC IgG   |

|   |          |       |       |   |    |          |     |     |
|---|----------|-------|-------|---|----|----------|-----|-----|
| 0 | 2.514216 | 0.923 | 0.067 | 0 | 11 | FKBP11   | ASC | IgG |
| 0 | 2.429963 | 0.952 | 0.153 | 0 | 11 | PDIA4    | ASC | IgG |
| 0 | 2.272908 | 0.925 | 0.124 | 0 | 11 | SDF2L1   | ASC | IgG |
| 0 | 2.119114 | 0.886 | 0.097 | 0 | 11 | CD38     | ASC | IgG |
| 0 | 2.111755 | 0.964 | 0.392 | 0 | 11 | PPIB     | ASC | IgG |
| 0 | 2.084044 | 0.941 | 0.22  | 0 | 11 | MYDGF    | ASC | IgG |
| 0 | 2.021646 | 0.869 | 0.223 | 0 | 11 | RGS1     | ASC | IgG |
| 0 | 1.939058 | 0.913 | 0.171 | 0 | 11 | MANF     | ASC | IgG |
| 0 | 1.929741 | 0.951 | 0.35  | 0 | 11 | SELENOK  | ASC | IgG |
| 0 | 1.92956  | 0.93  | 0.189 | 0 | 11 | SELENOS  | ASC | IgG |
| 0 | 1.927287 | 0.8   | 0.048 | 0 | 11 | ITM2C    | ASC | IgG |
| 0 | 1.85686  | 0.949 | 0.221 | 0 | 11 | SSR3     | ASC | IgG |
| 0 | 1.818542 | 0.888 | 0.125 | 0 | 11 | PRDX4    | ASC | IgG |
| 0 | 1.80038  | 0.942 | 0.243 | 0 | 11 | FKBP2    | ASC | IgG |
| 0 | 1.765269 | 0.992 | 0.862 | 0 | 11 | CD79A    | ASC | IgG |
| 0 | 1.756436 | 0.878 | 0.093 | 0 | 11 | DNAJB9   | ASC | IgG |
| 0 | 1.754371 | 0.801 | 0.089 | 0 | 11 | VPREB3   | ASC | IgG |
| 0 | 1.741574 | 0.975 | 0.626 | 0 | 11 | HERPUD1  | ASC | IgG |
| 0 | 1.699382 | 0.833 | 0.099 | 0 | 11 | LMAN1    | ASC | IgG |
| 0 | 1.694654 | 0.843 | 0.127 | 0 | 11 | SPCS3    | ASC | IgG |
| 0 | 1.677574 | 0.876 | 0.142 | 0 | 11 | HM13     | ASC | IgG |
| 0 | 1.672705 | 0.936 | 0.264 | 0 | 11 | RPN2     | ASC | IgG |
| 0 | 1.640505 | 0.889 | 0.207 | 0 | 11 | KDEL2    | ASC | IgG |
| 0 | 1.637621 | 0.766 | 0.095 | 0 | 11 | TNFRSF17 | ASC | IgG |
| 0 | 1.592178 | 0.942 | 0.332 | 0 | 11 | PDIA6    | ASC | IgG |
| 0 | 1.557725 | 0.826 | 0.094 | 0 | 11 | CRELD2   | ASC | IgG |
| 0 | 1.497756 | 0.921 | 0.186 | 0 | 11 | RGS13    | ASC | IgG |
| 0 | 1.488472 | 0.792 | 0.065 | 0 | 11 | RRBP1    | ASC | IgG |
| 0 | 1.46944  | 0.971 | 0.516 | 0 | 11 | SPCS2    | ASC | IgG |
| 0 | 1.453035 | 0.987 | 0.756 | 0 | 11 | CYBA     | ASC | IgG |
| 0 | 1.411774 | 0.819 | 0.126 | 0 | 11 | ERLEC1   | ASC | IgG |
| 0 | 1.367348 | 0.965 | 0.486 | 0 | 11 | SPCS1    | ASC | IgG |
| 0 | 1.358029 | 0.594 | 0.014 | 0 | 11 | PRDM1    | ASC | IgG |
| 0 | 1.357674 | 0.951 | 0.393 | 0 | 11 | TMED9    | ASC | IgG |
| 0 | 1.332906 | 0.871 | 0.189 | 0 | 11 | GLRX     | ASC | IgG |
| 0 | 1.332004 | 0.8   | 0.138 | 0 | 11 | DNAJB11  | ASC | IgG |
| 0 | 1.309608 | 0.889 | 0.253 | 0 | 11 | ARF4     | ASC | IgG |
| 0 | 1.299504 | 0.926 | 0.307 | 0 | 11 | P4HB     | ASC | IgG |
| 0 | 1.287172 | 0.929 | 0.298 | 0 | 11 | TRAM1    | ASC | IgG |
| 0 | 1.282715 | 0.884 | 0.292 | 0 | 11 | CALR     | ASC | IgG |
| 0 | 1.255304 | 0.877 | 0.216 | 0 | 11 | UBE2J1   | ASC | IgG |
| 0 | 1.237469 | 0.961 | 0.543 | 0 | 11 | SEC61G   | ASC | IgG |
| 0 | 1.236412 | 0.725 | 0.064 | 0 | 11 | GMPPB    | ASC | IgG |
| 0 | 1.229319 | 0.975 | 0.587 | 0 | 11 | SEC61B   | ASC | IgG |
| 0 | 1.226884 | 0.945 | 0.469 | 0 | 11 | RABAC1   | ASC | IgG |
| 0 | 1.225948 | 0.658 | 0.057 | 0 | 11 | NUCB2    | ASC | IgG |
| 0 | 1.225402 | 0.936 | 0.456 | 0 | 11 | MTDH     | ASC | IgG |
| 0 | 1.223204 | 0.894 | 0.35  | 0 | 11 | PDIA3    | ASC | IgG |
| 0 | 1.198806 | 0.911 | 0.304 | 0 | 11 | LMAN2    | ASC | IgG |
| 0 | 1.195425 | 0.875 | 0.199 | 0 | 11 | NANS     | ASC | IgG |

|     |           |       |       |       |    |         |            |     |
|-----|-----------|-------|-------|-------|----|---------|------------|-----|
| 0   | 1.167071  | 0.864 | 0.215 | 0     | 11 | TMED10  | ASC        | IgG |
| 0   | 1.164408  | 0.636 | 0.023 | 0     | 11 | SELENOM | ASC        | IgG |
| 0   | 1.148657  | 0.946 | 0.545 | 0     | 11 | SERP1   | ASC        | IgG |
| 0   | 1.145954  | 0.646 | 0.015 | 0     | 11 | CHPF    | ASC        | IgG |
| 0   | 1.129845  | 0.918 | 0.346 | 0     | 11 | REEP5   | ASC        | IgG |
| 0   | 1.126191  | 0.755 | 0.098 | 0     | 11 | DNAJC1  | ASC        | IgG |
| 0   | 1.091559  | 0.69  | 0.08  | 0     | 11 | PDXK    | ASC        | IgG |
| 0   | 1.063319  | 0.695 | 0.077 | 0     | 11 | DNAJC3  | ASC        | IgG |
| 0   | 1.038103  | 0.727 | 0.089 | 0     | 11 | TXNDC15 | ASC        | IgG |
| 0   | 1.034065  | 0.93  | 0.378 | 0     | 11 | TMED2   | ASC        | IgG |
| 0   | 1.025211  | 0.629 | 0.065 | 0     | 11 | CLPTM1L | ASC        | IgG |
| 0   | 1.00757   | 0.518 | 0.013 | 0     | 11 | BEX5    | ASC        | IgG |
| 0   | 1.000408  | 0.639 | 0.065 | 0     | 11 | TXNDC11 | ASC        | IgG |
| 0   | 0.9758317 |       | 0.648 | 0.062 | 0  | 11      | SEC61A1    | ASC |
| IgG |           |       |       |       |    |         |            |     |
| 0   | 0.9437166 |       | 0.553 | 0.043 | 0  | 11      | ANKRD28    | ASC |
| IgG |           |       |       |       |    |         |            |     |
| 0   | 0.9282912 |       | 0.515 | 0.024 | 0  | 11      | AC012236.1 |     |
|     | ASC       | IgG   |       |       |    |         |            |     |
| 0   | 0.871283  | 0.514 | 0.011 | 0     | 11 | ZBP1    | ASC        | IgG |
| 0   | -1.019783 |       | 0.996 | 1     | 0  | 11      | RPLP1      | ASC |
| IgG |           |       |       |       |    |         |            |     |
| 0   | -1.160622 |       | 0.991 | 0.996 | 0  | 11      | RPL8       | ASC |
| IgG |           |       |       |       |    |         |            |     |
| 0   | -1.175595 |       | 0.993 | 0.998 | 0  | 11      | RPL3       | ASC |
| IgG |           |       |       |       |    |         |            |     |
| 0   | -1.199542 |       | 0.988 | 0.997 | 0  | 11      | RPS15A     | ASC |
| IgG |           |       |       |       |    |         |            |     |
| 0   | -1.290168 |       | 0.998 | 1     | 0  | 11      | RPL41      | ASC |
| IgG |           |       |       |       |    |         |            |     |
| 0   | -1.292356 |       | 0.994 | 0.998 | 0  | 11      | RPS28      | ASC |
| IgG |           |       |       |       |    |         |            |     |
| 0   | -1.305582 |       | 0.984 | 0.994 | 0  | 11      | RPS9       | ASC |
| IgG |           |       |       |       |    |         |            |     |
| 0   | -1.311925 |       | 0.982 | 0.988 | 0  | 11      | RACK1      | ASC |
| IgG |           |       |       |       |    |         |            |     |
| 0   | -1.335394 |       | 0.971 | 0.992 | 0  | 11      | RPL18      | ASC |
| IgG |           |       |       |       |    |         |            |     |
| 0   | -1.35029  | 0.98  | 0.993 | 0     | 11 | RPS7    | ASC        | IgG |
| 0   | -1.352444 |       | 0.992 | 0.999 | 0  | 11      | RPL15      | ASC |
| IgG |           |       |       |       |    |         |            |     |
| 0   | -1.369231 |       | 0.983 | 0.997 | 0  | 11      | RPS13      | ASC |
| IgG |           |       |       |       |    |         |            |     |
| 0   | -1.403264 |       | 0.968 | 0.986 | 0  | 11      | RPL27      | ASC |
| IgG |           |       |       |       |    |         |            |     |
| 0   | -1.405555 |       | 0.993 | 0.998 | 0  | 11      | RPL18A     | ASC |
| IgG |           |       |       |       |    |         |            |     |
| 0   | -1.412387 |       | 0.983 | 0.993 | 0  | 11      | RPL35      | ASC |
| IgG |           |       |       |       |    |         |            |     |
| 0   | -1.423582 |       | 0.989 | 0.997 | 0  | 11      | RPL28      | ASC |

|          |           |       |       |   |    |        |     |
|----------|-----------|-------|-------|---|----|--------|-----|
| IgG<br>0 | -1.431957 | 0.979 | 0.994 | 0 | 11 | RPL6   | ASC |
| IgG<br>0 | -1.446797 | 0.993 | 0.998 | 0 | 11 | RPS15  | ASC |
| IgG<br>0 | -1.449901 | 0.968 | 0.985 | 0 | 11 | RPL29  | ASC |
| IgG<br>0 | -1.459963 | 0.965 | 0.986 | 0 | 11 | TMSB10 | ASC |
| IgG<br>0 | -1.466052 | 0.995 | 0.999 | 0 | 11 | RPS29  | ASC |
| IgG<br>0 | -1.469504 | 0.988 | 0.998 | 0 | 11 | RPS14  | ASC |
| IgG<br>0 | -1.481285 | 0.994 | 0.999 | 0 | 11 | RPS19  | ASC |
| IgG<br>0 | -1.489942 | 0.933 | 0.966 | 0 | 11 | RPL38  | ASC |
| IgG<br>0 | -1.497826 | 0.985 | 0.995 | 0 | 11 | RPS25  | ASC |
| IgG<br>0 | -1.500761 | 0.987 | 0.998 | 0 | 11 | RPL19  | ASC |
| IgG<br>0 | -1.502502 | 0.982 | 0.996 | 0 | 11 | RPS3   | ASC |
| IgG<br>0 | -1.526051 | 0.952 | 0.978 | 0 | 11 | RPS10  | ASC |
| IgG<br>0 | -1.526919 | 0.985 | 0.997 | 0 | 11 | RPL27A | ASC |
| IgG<br>0 | -1.527854 | 0.99  | 0.998 | 0 | 11 | RPL23A | ASC |
| IgG<br>0 | -1.534517 | 0.982 | 0.995 | 0 | 11 | RPL37A | ASC |
| IgG<br>0 | -1.536488 | 0.987 | 0.996 | 0 | 11 | RPL35A | ASC |
| IgG<br>0 | -1.537471 | 0.978 | 0.993 | 0 | 11 | RPL36  | ASC |
| IgG<br>0 | -1.547599 | 0.993 | 0.999 | 0 | 11 | PTMA   | ASC |
| IgG<br>0 | -1.550069 | 0.966 | 0.993 | 0 | 11 | RPL37  | ASC |
| IgG<br>0 | -1.557367 | 0.947 | 0.971 | 0 | 11 | RPL22  | ASC |
| IgG<br>0 | -1.563061 | 0.97  | 0.976 | 0 | 11 | RPS24  | ASC |
| IgG<br>0 | -1.564955 | 0.997 | 0.999 | 0 | 11 | RPS18  | ASC |
| IgG<br>0 | -1.597803 | 0.997 | 0.999 | 0 | 11 | RPL13  | ASC |
| IgG<br>0 | -1.602996 | 0.994 | 0.999 | 0 | 11 | RPS8   | ASC |
| IgG<br>0 | -1.657411 | 0.974 | 0.991 | 0 | 11 | RPL10A | ASC |

|     |           |       |       |       |    |        |            |
|-----|-----------|-------|-------|-------|----|--------|------------|
| IgG |           |       |       |       |    |        |            |
| 0   | -1.66282  | 0.994 | 1     | 0     | 11 | RPL13A | ASC IgG    |
| 0   | -1.681711 |       | 0.973 | 0.992 | 0  | 11     | RPL9 ASC   |
| IgG |           |       |       |       |    |        |            |
| 0   | -1.68384  | 0.995 | 1     | 0     | 11 | RPL21  | ASC IgG    |
| 0   | -1.685675 |       | 0.935 | 0.969 | 0  | 11     | RPS17 ASC  |
| IgG |           |       |       |       |    |        |            |
| 0   | -1.721914 |       | 0.904 | 0.962 | 0  | 11     | RPL23 ASC  |
| IgG |           |       |       |       |    |        |            |
| 0   | -1.723169 |       | 0.994 | 1     | 0  | 11     | RPS2 ASC   |
| IgG |           |       |       |       |    |        |            |
| 0   | -1.723833 |       | 0.971 | 0.991 | 0  | 11     | RPS20 ASC  |
| IgG |           |       |       |       |    |        |            |
| 0   | -1.736253 |       | 0.993 | 0.999 | 0  | 11     | RPL34 ASC  |
| IgG |           |       |       |       |    |        |            |
| 0   | -1.739912 |       | 0.987 | 0.998 | 0  | 11     | RPL26 ASC  |
| IgG |           |       |       |       |    |        |            |
| 0   | -1.750126 |       | 0.932 | 0.977 | 0  | 11     | RPL36A ASC |
| IgG |           |       |       |       |    |        |            |
| 0   | -1.752353 |       | 0.966 | 0.987 | 0  | 11     | RPL14 ASC  |
| IgG |           |       |       |       |    |        |            |
| 0   | -1.752976 |       | 0.992 | 0.998 | 0  | 11     | RPL7 ASC   |
| IgG |           |       |       |       |    |        |            |
| 0   | -1.759994 |       | 0.937 | 0.97  | 0  | 11     | MT-ND3 ASC |
| IgG |           |       |       |       |    |        |            |
| 0   | -1.765906 |       | 0.991 | 0.999 | 0  | 11     | RPS6 ASC   |
| IgG |           |       |       |       |    |        |            |
| 0   | -1.77372  | 0.946 | 0.982 | 0     | 11 | RPL5   | ASC IgG    |
| 0   | -1.789574 |       | 0.947 | 0.984 | 0  | 11     | RPS21 ASC  |
| IgG |           |       |       |       |    |        |            |
| 0   | -1.790043 |       | 0.994 | 0.999 | 0  | 11     | RPS27A ASC |
| IgG |           |       |       |       |    |        |            |
| 0   | -1.79248  | 0.991 | 0.999 | 0     | 11 | RPLP2  | ASC IgG    |
| 0   | -1.811464 |       | 0.994 | 0.999 | 0  | 11     | EEF1A1 ASC |
| IgG |           |       |       |       |    |        |            |
| 0   | -1.856049 |       | 0.949 | 0.982 | 0  | 11     | RPSA ASC   |
| IgG |           |       |       |       |    |        |            |
| 0   | -1.857638 |       | 0.983 | 0.998 | 0  | 11     | RPS3A ASC  |
| IgG |           |       |       |       |    |        |            |
| 0   | -1.868614 |       | 0.788 | 0.91  | 0  | 11     | IGHM ASC   |
| IgG |           |       |       |       |    |        |            |
| 0   | -1.871521 |       | 0.984 | 0.998 | 0  | 11     | RPL11 ASC  |
| IgG |           |       |       |       |    |        |            |
| 0   | -1.87196  | 0.998 | 1     | 0     | 11 | RPS27  | ASC IgG    |
| 0   | -1.87216  | 0.952 | 0.992 | 0     | 11 | RPL30  | ASC IgG    |
| 0   | -1.875366 |       | 0.492 | 0.785 | 0  | 11     | NAP1L1 ASC |
| IgG |           |       |       |       |    |        |            |
| 0   | -1.893758 |       | 0.99  | 0.999 | 0  | 11     | RPL32 ASC  |
| IgG |           |       |       |       |    |        |            |
| 0   | -1.92022  | 0.983 | 0.997 | 0     | 11 | RPL12  | ASC IgG    |

|               |            |       |       |               |    |         |     |
|---------------|------------|-------|-------|---------------|----|---------|-----|
| 0             | -1.923743  | 0.43  | 0.734 | 0             | 11 | LIMD2   | ASC |
| IgG           |            |       |       |               |    |         |     |
| 0             | -1.924687  | 0.979 | 0.998 | 0             | 11 | RPS23   | ASC |
| IgG           |            |       |       |               |    |         |     |
| 0             | -1.937758  | 0.981 | 0.996 | 0             | 11 | RPL31   | ASC |
| IgG           |            |       |       |               |    |         |     |
| 0             | -1.986773  | 0.805 | 0.93  | 0             | 11 | HNRNPA1 | ASC |
| IgG           |            |       |       |               |    |         |     |
| 0             | -2.031394  | 0.99  | 0.999 | 0             | 11 | RPL39   | ASC |
| IgG           |            |       |       |               |    |         |     |
| 0             | -2.072262  | 0.212 | 0.66  | 0             | 11 | ZFP36L1 | ASC |
| IgG           |            |       |       |               |    |         |     |
| 0             | -2.078344  | 0.982 | 0.997 | 0             | 11 | RPS12   | ASC |
| IgG           |            |       |       |               |    |         |     |
| 0             | -2.098328  | 0.8   | 0.939 | 0             | 11 | BTG1    | ASC |
| IgG           |            |       |       |               |    |         |     |
| 0             | -2.100425  | 0.947 | 0.991 | 0             | 11 | ACTB    | ASC |
| IgG           |            |       |       |               |    |         |     |
| 0             | -2.135551  | 0.982 | 0.999 | 0             | 11 | TMSB4X  | ASC |
| IgG           |            |       |       |               |    |         |     |
| 0             | -2.253342  | 0.578 | 0.89  | 0             | 11 | MS4A1   | ASC |
| IgG           |            |       |       |               |    |         |     |
| 0             | -2.308583  | 0.61  | 0.876 | 0             | 11 | CD52    | ASC |
| IgG           |            |       |       |               |    |         |     |
| 0             | -2.353238  | 0.502 | 0.857 | 0             | 11 | CD37    | ASC |
| IgG           |            |       |       |               |    |         |     |
| 0             | -2.735483  | 0.292 | 0.764 | 0             | 11 | CXCR4   | ASC |
| IgG           |            |       |       |               |    |         |     |
| 1.333977e-322 | -1.163694  | 0.983 | 0.993 | 2.378348e-318 | 11 |         |     |
| RPS5          | ASC IgG    |       |       |               |    |         |     |
| 4.199558e-322 | -1.164679  | 0.983 | 0.991 | 7.487392e-318 | 11 |         |     |
| RPS16         | ASC IgG    |       |       |               |    |         |     |
| 4.248965e-322 | -0.7851164 | 0.991 | 0.999 | 7.575479e-318 | 11 |         |     |
| RPL10         | ASC IgG    |       |       |               |    |         |     |
| 5.147621e-319 | -0.9158427 | 0.994 | 0.997 | 9.177693e-315 | 11 |         |     |
| RPS4X         | ASC IgG    |       |       |               |    |         |     |
| 5.121904e-318 | 1.066966   | 0.931 | 0.464 | 9.131843e-314 | 11 |         |     |
| SSR2          | ASC IgG    |       |       |               |    |         |     |
| 6.030881e-315 | 0.9657147  | 0.733 | 0.113 | 1.075246e-310 | 11 |         |     |
| SRPRB         | ASC IgG    |       |       |               |    |         |     |
| 1.416425e-309 | 1.500506   | 0.726 | 0.171 | 2.525344e-305 | 11 |         |     |
| RGS2          | ASC IgG    |       |       |               |    |         |     |
| 6.580102e-304 | 0.3824939  | 0.212 | 0.001 | 1.173166e-299 | 11 |         |     |
| SDC1          | ASC IgG    |       |       |               |    |         |     |
| 7.778211e-303 | 0.9844663  | 0.715 | 0.107 | 1.386777e-298 | 11 |         |     |
| SPATS2        | ASC IgG    |       |       |               |    |         |     |
| 2.766578e-302 | -2.184847  | 0.112 | 0.556 | 4.932532e-298 | 11 |         |     |
| CCR7          | ASC IgG    |       |       |               |    |         |     |
| 6.147245e-302 | -1.870487  | 0.646 | 0.819 | 1.095992e-297 | 11 |         |     |
| COR01A        | ASC IgG    |       |       |               |    |         |     |

|               |                |       |               |               |     |
|---------------|----------------|-------|---------------|---------------|-----|
| 2.708982e-301 | -1.289841      | 0.958 | 0.977         | 4.829844e-297 | 11  |
| UBA52         | ASC IgG        |       |               |               |     |
| 3.791876e-300 | 0.4524369      | 0.177 | 0.618         | 6.760535e-296 | 11  |
| IGHD          | ASC IgG        |       |               |               |     |
| 6.442231e-298 | 1.227816 0.575 | 0.071 | 1.148585e-293 | 11            |     |
| HIST1H1C      | ASC IgG        |       |               |               |     |
| 2.031454e-295 | 0.931345 0.758 | 0.137 | 3.62188e-291  | 11            |     |
| ALG5          | ASC IgG        |       |               |               |     |
| 5.490216e-295 | -2.220395      | 0.373 | 0.663         | 9.788505e-291 | 11  |
| TCL1A         | ASC IgG        |       |               |               |     |
| 3.123069e-294 | 0.90295 0.534  | 0.052 | 5.568119e-290 | 11            |     |
| QPCT          | ASC IgG        |       |               |               |     |
| 2.231596e-293 | 0.7434122      | 0.5   | 0.031         | 3.978712e-289 | 11  |
| SIL1          | ASC IgG        |       |               |               |     |
| 8.685409e-286 | 4.564946 0.987 | 0.925 | 1.548522e-281 | 11            |     |
| IGKC          | ASC IgG        |       |               |               |     |
| 3.230345e-283 | -1.730348      | 0.312 | 0.635         | 5.759382e-279 | 11  |
| HLA-DMB       | ASC IgG        |       |               |               |     |
| 2.501233e-280 | -1.726994      | 0.911 | 0.932         | 4.459449e-276 | 11  |
| HMGB1         | ASC IgG        |       |               |               |     |
| 2.13796e-279  | 0.9790503      | 0.941 | 0.439         | 3.811769e-275 | 11  |
| TMEM59        | ASC IgG        |       |               |               |     |
| 2.773717e-275 | -1.35044 0.951 | 0.958 | 4.94526e-271  | 11            |     |
| PABPC1        | ASC IgG        |       |               |               |     |
| 2.439628e-273 | 1.275317 0.822 | 0.262 | 4.349613e-269 | 11            |     |
| PIM2          | ASC IgG        |       |               |               |     |
| 8.765776e-272 | 0.7978618      | 0.301 | 0.006         | 1.56285e-267  | 11  |
| IGLV6-57      | ASC IgG        |       |               |               |     |
| 2.667589e-271 | 0.3067786      | 0.203 | 0.002         | 4.756044e-267 | 11  |
| HID1          | ASC IgG        |       |               |               |     |
| 2.406027e-270 | -1.232272      | 0.971 | 0.982         | 4.289706e-266 | 11  |
| MT-C03        | ASC IgG        |       |               |               |     |
| 2.170304e-268 | -1.361019      | 0.941 | 0.958         | 3.869435e-264 | 11  |
| RPL24         | ASC IgG        |       |               |               |     |
| 1.341168e-266 | -1.501361      | 0.888 | 0.924         | 2.391168e-262 | 11  |
| BTF3          | ASC IgG        |       |               |               |     |
| 4.06596e-266  | 0.7433611      | 0.424 | 0.029         | 7.249201e-262 | 11  |
| DENND6B       | ASC IgG        |       |               |               |     |
| 2.049716e-265 | 0.9401613      | 0.766 | 0.16          | 3.654439e-261 | 11  |
| DERL1         | ASC IgG        |       |               |               |     |
| 5.093532e-263 | -1.800534      | 0.137 | 0.523         | 9.081258e-259 | 11  |
| BANK1         | ASC IgG        |       |               |               |     |
| 2.446554e-260 | -1.227986      | 0.97  | 0.98          | 4.36196e-256  | 11  |
| RPL7A         | ASC IgG        |       |               |               |     |
| 6.792002e-259 | -2.43931 0.194 | 0.497 | 1.210946e-254 | 11            | LTB |
| ASC IgG       |                |       |               |               |     |
| 7.310482e-258 | 0.8259469      | 0.639 | 0.081         | 1.303386e-253 | 11  |
| RPN1          | ASC IgG        |       |               |               |     |
| 6.906242e-257 | -1.516586      | 0.845 | 0.896         | 1.231314e-252 | 11  |
| PPIA          | ASC IgG        |       |               |               |     |



|               |                |       |       |               |    |
|---------------|----------------|-------|-------|---------------|----|
| 1.608257e-256 | 0.8334802      | 0.634 | 0.088 | 2.867361e-252 | 11 |
| SLC35B1       | ASC IgG        |       |       |               |    |
| 1.665683e-256 | 0.8444759      | 0.594 | 0.07  | 2.969746e-252 | 11 |
| ST6GALNAC4    | ASC IgG        |       |       |               |    |
| 6.751821e-253 | 0.5601642      | 0.369 | 0.018 | 1.203782e-248 | 11 |
| KCNN3         | ASC IgG        |       |       |               |    |
| 4.796257e-251 | 0.9202245      | 0.911 | 0.424 | 8.551247e-247 | 11 |
| DAD1          | ASC IgG        |       |       |               |    |
| 3.639192e-245 | -1.845756      | 0.158 | 0.533 | 6.488316e-241 | 11 |
| ID3           | ASC IgG        |       |       |               |    |
| 1.852406e-243 | 0.7774187      | 0.494 | 0.04  | 3.302654e-239 | 11 |
| MEI1          | ASC IgG        |       |       |               |    |
| 1.949282e-241 | -1.672203      | 0.926 | 0.93  | 3.475375e-237 | 11 |
| NPM1          | ASC IgG        |       |       |               |    |
| 1.002313e-239 | 0.7978015      | 0.636 | 0.072 | 1.787023e-235 | 11 |
| TENT5C        | ASC IgG        |       |       |               |    |
| 5.151077e-239 | 0.9121292      | 0.808 | 0.206 | 9.183855e-235 | 11 |
| SSR1          | ASC IgG        |       |       |               |    |
| 1.221434e-237 | 0.838582 0.959 | 0.594 |       | 2.177694e-233 | 11 |
| TMEM258       | ASC IgG        |       |       |               |    |
| 1.691206e-235 | 5.288669 0.914 | 0.637 |       | 3.015251e-231 | 11 |
| IGLC2         | ASC IgG        |       |       |               |    |
| 2.396637e-234 | 0.9688738      | 0.805 | 0.19  | 4.272963e-230 | 11 |
| EAF2          | ASC IgG        |       |       |               |    |
| 3.395107e-234 | 0.7914174      | 0.606 | 0.067 | 6.053136e-230 | 11 |
| PLD3          | ASC IgG        |       |       |               |    |
| 8.764867e-233 | 0.8338825      | 0.782 | 0.191 | 1.562688e-228 | 11 |
| TMEM208       | ASC IgG        |       |       |               |    |
| 2.625013e-232 | -1.218335      | 0.952 | 0.964 | 4.680135e-228 | 11 |
| RPL4          | ASC IgG        |       |       |               |    |
| 7.577505e-232 | 0.6783647      | 0.967 | 0.746 | 1.350993e-227 | 11 |
| HLA-C         | ASC IgG        |       |       |               |    |
| 8.53807e-231  | -1.534644      | 0.712 | 0.828 | 1.522253e-226 | 11 |
| EIF3E         | ASC IgG        |       |       |               |    |
| 1.572317e-227 | 0.8569311      | 0.951 | 0.644 | 2.803284e-223 | 11 |
| TMBIM6        | ASC IgG        |       |       |               |    |
| 5.32413e-224  | -1.448231      | 0.902 | 0.935 | 9.492391e-220 | 11 |
| MT-ATP6       | ASC IgG        |       |       |               |    |
| 8.88109e-224  | -1.61646 0.181 | 0.51  |       | 1.583409e-219 | 11 |
| FOXP1         | ASC IgG        |       |       |               |    |
| 2.56704e-221  | 0.7782316      | 0.541 | 0.05  | 4.576776e-217 | 11 |
| CHST2         | ASC IgG        |       |       |               |    |
| 3.309e-219    | 4.934097 0.709 | 0.421 |       | 5.899616e-215 | 11 |
| IGLC3         | ASC IgG        |       |       |               |    |
| 3.54386e-215  | -1.644153      | 0.454 | 0.683 | 6.318348e-211 | 11 |
| TAGLN2        | ASC IgG        |       |       |               |    |
| 1.580863e-214 | 0.8181147      | 0.722 | 0.161 | 2.818521e-210 | 11 |
| DERL2         | ASC IgG        |       |       |               |    |
| 6.117841e-211 | -1.132832      | 0.978 | 0.98  | 1.09075e-206  | 11 |
| MT-C01        | ASC IgG        |       |       |               |    |

|               |            |       |       |               |    |
|---------------|------------|-------|-------|---------------|----|
| 7.627553e-210 | -1.526341  | 0.089 | 0.433 | 1.359916e-205 | 11 |
| DEK           | ASC IgG    |       |       |               |    |
| 7.642736e-210 | -1.042205  | 0.978 | 0.982 | 1.362623e-205 | 11 |
| RPS11         | ASC IgG    |       |       |               |    |
| 2.8867e-209   | 0.8338603  | 0.885 | 0.374 | 5.146698e-205 | 11 |
| CUTA          | ASC IgG    |       |       |               |    |
| 8.994241e-209 | -1.565832  | 0.112 | 0.438 | 1.603583e-204 | 11 |
| IRF8          | ASC IgG    |       |       |               |    |
| 1.999423e-207 | -1.455278  | 0.953 | 0.946 | 3.564771e-203 | 11 |
| HLA-DRA       | ASC IgG    |       |       |               |    |
| 2.155617e-207 | 0.8884316  | 0.965 | 0.61  | 3.84325e-203  | 11 |
| SUB1          | ASC IgG    |       |       |               |    |
| 1.848209e-206 | 0.8650746  | 0.866 | 0.358 | 3.295171e-202 | 11 |
| OSTC          | ASC IgG    |       |       |               |    |
| 2.659313e-206 | 0.7559254  | 0.649 | 0.112 | 4.741289e-202 | 11 |
| SAR1B         | ASC IgG    |       |       |               |    |
| 1.080129e-204 | 0.9469356  | 0.568 | 0.094 | 1.925762e-200 | 11 |
| CITED2        | ASC IgG    |       |       |               |    |
| 1.214198e-204 | 0.669984   | 0.481 | 0.043 | 2.164794e-200 | 11 |
| SEL1L         | ASC IgG    |       |       |               |    |
| 4.378506e-204 | 0.722631   | 0.565 | 0.058 | 7.806438e-200 | 11 |
| CHST12        | ASC IgG    |       |       |               |    |
| 2.491715e-202 | 0.6647363  | 0.198 | 0.004 | 4.442478e-198 | 11 |
| FRZB          | ASC IgG    |       |       |               |    |
| 1.427815e-201 | 0.7953078  | 0.707 | 0.169 | 2.545651e-197 | 11 |
| LRR59         | ASC IgG    |       |       |               |    |
| 7.095651e-201 | 0.5883716  | 0.432 | 0.03  | 1.265084e-196 | 11 |
| SLC17A9       | ASC IgG    |       |       |               |    |
| 1.407575e-200 | 0.8038238  | 0.766 | 0.215 | 2.509566e-196 | 11 |
| DDOST         | ASC IgG    |       |       |               |    |
| 2.719305e-200 | 0.5779111  | 0.414 | 0.025 | 4.848248e-196 | 11 |
| TRIB1         | ASC IgG    |       |       |               |    |
| 6.010146e-200 | -1.325892  | 0.914 | 0.919 | 1.071549e-195 | 11 |
| CFL1          | ASC IgG    |       |       |               |    |
| 2.909897e-199 | -1.201685  | 0.963 | 0.974 | 5.188056e-195 | 11 |
| MT-ND4        | ASC IgG    |       |       |               |    |
| 8.721333e-199 | 0.354279   | 0.245 | 0.006 | 1.554927e-194 | 11 |
| TXNDC5        | ASC IgG    |       |       |               |    |
| 1.051396e-197 | 0.7643971  | 0.616 | 0.118 | 1.874534e-193 | 11 |
| CYTOR         | ASC IgG    |       |       |               |    |
| 1.582639e-196 | -1.571249  | 0.409 | 0.654 | 2.821688e-192 | 11 |
| ZFAS1         | ASC IgG    |       |       |               |    |
| 2.620029e-196 | -0.9696108 | 0.986 | 0.988 | 4.67125e-192  | 11 |
| RPLP0         | ASC IgG    |       |       |               |    |
| 1.27856e-193  | -1.802062  | 0.149 | 0.481 | 2.279545e-189 | 11 |
| CD83          | ASC IgG    |       |       |               |    |
| 1.633286e-193 | 0.5852776  | 0.426 | 0.029 | 2.911986e-189 | 11 |
| CKAP4         | ASC IgG    |       |       |               |    |
| 3.437294e-193 | 0.8025395  | 0.81  | 0.265 | 6.128352e-189 | 11 |
| SRM           | ASC IgG    |       |       |               |    |

|               |                |       |       |               |    |
|---------------|----------------|-------|-------|---------------|----|
| 4.938443e-193 | -1.360049      | 0.742 | 0.82  | 8.804749e-189 | 11 |
| SEPT7         | ASC IgG        |       |       |               |    |
| 3.697295e-191 | 0.7645656      | 0.701 | 0.151 | 6.591907e-187 | 11 |
| MLEC          | ASC IgG        |       |       |               |    |
| 1.080178e-189 | -1.380068      | 0.148 | 0.442 | 1.925849e-185 | 11 |
| CYB561A3      | ASC IgG        |       |       |               |    |
| 9.062365e-189 | -1.390495      | 0.893 | 0.917 | 1.615729e-184 | 11 |
| EEF1B2        | ASC IgG        |       |       |               |    |
| 2.892661e-188 | 0.5678676      | 0.429 | 0.033 | 5.157326e-184 | 11 |
| KCNK6         | ASC IgG        |       |       |               |    |
| 3.209367e-188 | 0.62053 0.501  | 0.053 |       | 5.72198e-184  | 11 |
| CALU          | ASC IgG        |       |       |               |    |
| 2.81203e-187  | 0.739751 0.599 | 0.099 |       | 5.013569e-183 | 11 |
| PREB          | ASC IgG        |       |       |               |    |
| 4.173568e-186 | 0.451852 0.312 | 0.012 |       | 7.441055e-182 | 11 |
| ELL2          | ASC IgG        |       |       |               |    |
| 1.826504e-185 | -1.363745      | 0.954 | 0.961 | 3.256475e-181 | 11 |
| MT-ND2        | ASC IgG        |       |       |               |    |
| 2.97782e-183  | 0.9127721      | 0.93  | 0.522 | 5.309156e-179 | 11 |
| ISG20         | ASC IgG        |       |       |               |    |
| 7.104866e-183 | -1.803776      | 0.551 | 0.702 | 1.266727e-178 | 11 |
| EMP3          | ASC IgG        |       |       |               |    |
| 9.483555e-183 | -0.7431852     | 0.991 | 0.993 | 1.690823e-178 | 11 |
| FAU           | ASC IgG        |       |       |               |    |
| 1.484638e-182 | -1.18537 0.907 | 0.918 |       | 2.646961e-178 | 11 |
| COX4I1        | ASC IgG        |       |       |               |    |
| 2.381094e-180 | -1.146193      | 0.941 | 0.944 | 4.245253e-176 | 11 |
| NACA          | ASC IgG        |       |       |               |    |
| 1.376241e-179 | 0.9440768      | 0.603 | 0.096 | 2.4537e-175   | 11 |
| CD9           | ASC IgG        |       |       |               |    |
| 9.682124e-179 | 0.7207148      | 0.735 | 0.187 | 1.726226e-174 | 11 |
| SEC13         | ASC IgG        |       |       |               |    |
| 1.090882e-177 | -1.501561      | 0.558 | 0.7   | 1.944934e-173 | 11 |
| HNRNPDL       | ASC IgG        |       |       |               |    |
| 2.626559e-177 | 0.7729034      | 0.712 | 0.153 | 4.682892e-173 | 11 |
| SEL1L3        | ASC IgG        |       |       |               |    |
| 2.920409e-177 | 0.7292484      | 0.78  | 0.241 | 5.206797e-173 | 11 |
| SRGN          | ASC IgG        |       |       |               |    |
| 8.879302e-177 | -1.889094      | 0.61  | 0.719 | 1.583091e-172 | 11 |
| HMG2          | ASC IgG        |       |       |               |    |
| 1.961329e-176 | 0.599495 0.398 | 0.03  |       | 3.496853e-172 | 11 |
| CPEB4         | ASC IgG        |       |       |               |    |
| 1.01904e-174  | -1.407797      | 0.737 | 0.818 | 1.816847e-170 | 11 |
| NOP53         | ASC IgG        |       |       |               |    |
| 2.165466e-174 | 0.6468541      | 0.526 | 0.061 | 3.860809e-170 | 11 |
| EDEM2         | ASC IgG        |       |       |               |    |
| 6.820211e-173 | 0.7084486      | 0.34  | 0.022 | 1.215975e-168 | 11 |
| DHRS9         | ASC IgG        |       |       |               |    |
| 4.394098e-172 | 0.5284735      | 0.375 | 0.026 | 7.834238e-168 | 11 |
| SEC24D        | ASC IgG        |       |       |               |    |

|               |           |       |       |               |    |
|---------------|-----------|-------|-------|---------------|----|
| 1.444791e-170 | -1.577432 | 0.433 | 0.615 | 2.575918e-166 | 11 |
| SYNGR2        | ASC IgG   |       |       |               |    |
| 1.891476e-168 | -1.363851 | 0.953 | 0.942 | 3.372312e-164 | 11 |
| YBX1          | ASC IgG   |       |       |               |    |
| 4.79049e-168  | 0.6793202 | 0.945 | 0.568 | 8.540965e-164 | 11 |
| COPE          | ASC IgG   |       |       |               |    |
| 6.551966e-168 | 0.6653983 | 0.7   | 0.142 | 1.16815e-163  | 11 |
| MGAT1         | ASC IgG   |       |       |               |    |
| 1.851011e-166 | 0.6552667 | 0.462 | 0.044 | 3.300167e-162 | 11 |
| CPCG1         | ASC IgG   |       |       |               |    |
| 6.400301e-165 | 0.8719744 | 0.995 | 0.962 | 1.14111e-160  | 11 |
| FTL           | ASC IgG   |       |       |               |    |
| 5.094975e-164 | 0.8790205 | 0.771 | 0.29  | 9.083831e-160 | 11 |
| CD27          | ASC IgG   |       |       |               |    |
| 5.412351e-163 | 0.674443  | 0.742 | 0.194 | 9.649681e-159 | 11 |
| CISD2         | ASC IgG   |       |       |               |    |
| 1.218279e-162 | 0.5927235 | 0.524 | 0.078 | 2.172069e-158 | 11 |
| UBA5          | ASC IgG   |       |       |               |    |
| 1.063163e-161 | 0.6961959 | 0.74  | 0.201 | 1.895513e-157 | 11 |
| RAB1A         | ASC IgG   |       |       |               |    |
| 1.191183e-161 | 0.5266549 | 0.386 | 0.032 | 2.12376e-157  | 11 |
| BHLHE41       | ASC IgG   |       |       |               |    |
| 2.392848e-161 | -1.404659 | 0.404 | 0.575 | 4.266208e-157 | 11 |
| SNX2          | ASC IgG   |       |       |               |    |
| 3.055136e-160 | -1.351569 | 0.116 | 0.408 | 5.447001e-156 | 11 |
| REL           | ASC IgG   |       |       |               |    |
| 3.364604e-159 | -1.195093 | 0.92  | 0.917 | 5.998752e-155 | 11 |
| PFDN5         | ASC IgG   |       |       |               |    |
| 2.4332e-158   | -1.358323 | 0.08  | 0.345 | 4.338152e-154 | 11 |
| HVCN1         | ASC IgG   |       |       |               |    |
| 2.869825e-158 | 0.5972233 | 0.479 | 0.057 | 5.116611e-154 | 11 |
| THEMIS2       | ASC IgG   |       |       |               |    |
| 2.363546e-157 | 0.6613372 | 0.891 | 0.394 | 4.213967e-153 | 11 |
| GUK1          | ASC IgG   |       |       |               |    |
| 2.8998e-157   | 0.6827214 | 0.769 | 0.221 | 5.170053e-153 | 11 |
| LRPAP1        | ASC IgG   |       |       |               |    |
| 8.992909e-157 | 0.6475596 | 0.681 | 0.17  | 1.603346e-152 | 11 |
| KDELRL1       | ASC IgG   |       |       |               |    |
| 1.217154e-155 | -1.3109   | 0.846 | 0.846 | 2.170063e-151 | 11 |
| HNRNPA2B1     | ASC IgG   |       |       |               |    |
| 6.742223e-155 | 0.631348  | 0.683 | 0.158 | 1.202071e-150 | 11 |
| EMC7          | ASC IgG   |       |       |               |    |
| 2.024557e-154 | 0.3123605 | 0.205 | 0.005 | 3.609583e-150 | 11 |
| B9D1          | ASC IgG   |       |       |               |    |
| 3.09185e-154  | -1.717114 | 0.861 | 0.848 | 5.51246e-150  | 11 |
| HSP90AB1      | ASC IgG   |       |       |               |    |
| 1.573033e-153 | 0.4307488 | 0.305 | 0.012 | 2.80456e-149  | 11 |
| ADA2          | ASC IgG   |       |       |               |    |
| 1.554517e-152 | -1.420477 | 0.187 | 0.412 | 2.771549e-148 | 11 |
| SMIM14        | ASC IgG   |       |       |               |    |

|               |                |       |               |               |    |
|---------------|----------------|-------|---------------|---------------|----|
| 9.841736e-152 | -1.364962      | 0.85  | 0.855         | 1.754683e-147 | 11 |
| SH3BGRL3      | ASC IgG        |       |               |               |    |
| 1.116103e-149 | -0.9121107     | 0.975 | 0.979         | 1.989901e-145 | 11 |
| MT-C02        | ASC IgG        |       |               |               |    |
| 3.667787e-149 | 0.653243 0.506 | 0.077 | 6.539297e-145 | 11            |    |
| TPST2         | ASC IgG        |       |               |               |    |
| 1.392188e-148 | 0.6361229      | 0.749 | 0.216         | 2.482132e-144 | 11 |
| UFM1          | ASC IgG        |       |               |               |    |
| 2.594554e-148 | -1.330104      | 0.496 | 0.623         | 4.62583e-144  | 11 |
| IFI16         | ASC IgG        |       |               |               |    |
| 2.934416e-148 | 0.4267376      | 0.341 | 0.021         | 5.23177e-144  | 11 |
| HSPA13        | ASC IgG        |       |               |               |    |
| 6.358763e-148 | -1.51731 0.189 | 0.377 | 1.133704e-143 | 11            |    |
| SELL          | ASC IgG        |       |               |               |    |
| 5.424924e-147 | -1.379024      | 0.321 | 0.539         | 9.672097e-143 | 11 |
| IMPDH2        | ASC IgG        |       |               |               |    |
| 2.017005e-146 | 0.3437279      | 0.256 | 0.009         | 3.596119e-142 | 11 |
| PARM1         | ASC IgG        |       |               |               |    |
| 4.550875e-146 | 0.9308743      | 0.369 | 0.066         | 8.113756e-142 | 11 |
| H1FX          | ASC IgG        |       |               |               |    |
| 1.415167e-145 | 0.4222535      | 0.316 | 0.016         | 2.523102e-141 | 11 |
| WIPI1         | ASC IgG        |       |               |               |    |
| 3.975605e-144 | -1.280964      | 0.931 | 0.899         | 7.088105e-140 | 11 |
| PFN1          | ASC IgG        |       |               |               |    |
| 8.381929e-142 | -1.287433      | 0.819 | 0.805         | 1.494414e-137 | 11 |
| CALM2         | ASC IgG        |       |               |               |    |
| 1.623328e-141 | -1.0636 0.055  | 0.295 | 2.894231e-137 | 11            |    |
| RUBCNL        | ASC IgG        |       |               |               |    |
| 1.415416e-140 | -1.158145      | 0.107 | 0.345         | 2.523545e-136 | 11 |
| SPIB          | ASC IgG        |       |               |               |    |
| 1.599109e-140 | 0.7554112      | 0.671 | 0.154         | 2.851052e-136 | 11 |
| CCDC88A       | ASC IgG        |       |               |               |    |
| 1.046579e-139 | -1.360436      | 0.317 | 0.494         | 1.865947e-135 | 11 |
| UCP2          | ASC IgG        |       |               |               |    |
| 2.695626e-139 | -1.18409 0.77  | 0.776 | 4.806032e-135 | 11            |    |
| ARHGDIB       | ASC IgG        |       |               |               |    |
| 3.537951e-139 | 0.4575583      | 0.344 | 0.033         | 6.307813e-135 | 11 |
| PKHD1L1       | ASC IgG        |       |               |               |    |
| 1.174327e-138 | 0.5843907      | 0.876 | 0.373         | 2.093708e-134 | 11 |
| PSAP          | ASC IgG        |       |               |               |    |
| 1.764479e-138 | 0.5620748      | 0.515 | 0.089         | 3.14589e-134  | 11 |
| HDLBP         | ASC IgG        |       |               |               |    |
| 2.020887e-138 | 0.5591521      | 0.543 | 0.085         | 3.60304e-134  | 11 |
| TMED5         | ASC IgG        |       |               |               |    |
| 4.24684e-138  | 0.5432231      | 0.584 | 0.108         | 7.571692e-134 | 11 |
| NEU1          | ASC IgG        |       |               |               |    |
| 3.370454e-137 | -1.280154      | 0.282 | 0.481         | 6.009183e-133 | 11 |
| TNFAIP8       | ASC IgG        |       |               |               |    |
| 4.407665e-137 | 0.4628611      | 0.323 | 0.023         | 7.858427e-133 | 11 |
| GLCCI1        | ASC IgG        |       |               |               |    |

|               |           |       |       |               |    |
|---------------|-----------|-------|-------|---------------|----|
| 1.235843e-136 | -1.184085 | 0.078 | 0.327 | 2.203384e-132 | 11 |
| TUBA1A        | ASC IgG   |       |       |               |    |
| 1.31255e-136  | -1.373655 | 0.096 | 0.322 | 2.340146e-132 | 11 |
| CD69          | ASC IgG   |       |       |               |    |
| 9.157773e-136 | -1.230343 | 0.076 | 0.303 | 1.632739e-131 | 11 |
| LINC00926     | ASC IgG   |       |       |               |    |
| 1.269064e-135 | 0.5727882 | 0.488 | 0.079 | 2.262615e-131 | 11 |
| ZBTB38        | ASC IgG   |       |       |               |    |
| 1.920659e-135 | -1.192553 | 0.915 | 0.855 | 3.424343e-131 | 11 |
| CD79B         | ASC IgG   |       |       |               |    |
| 3.698708e-135 | -1.220511 | 0.653 | 0.704 | 6.594427e-131 | 11 |
| COMMD6        | ASC IgG   |       |       |               |    |
| 4.132375e-135 | 0.6279815 | 0.861 | 0.388 | 7.367611e-131 | 11 |
| UBXN4         | ASC IgG   |       |       |               |    |
| 9.064645e-135 | -1.716441 | 0.373 | 0.576 | 1.616136e-130 | 11 |
| VIM           | ASC IgG   |       |       |               |    |
| 4.001763e-133 | 0.5716848 | 0.666 | 0.171 | 7.134743e-129 | 11 |
| YIF1A         | ASC IgG   |       |       |               |    |
| 4.532874e-133 | -1.241794 | 0.727 | 0.765 | 8.081661e-129 | 11 |
| MYL12A        | ASC IgG   |       |       |               |    |
| 1.21283e-132  | 0.3473241 | 0.26  | 0.014 | 2.162354e-128 | 11 |
| PDIA5         | ASC IgG   |       |       |               |    |
| 1.549264e-131 | 0.4042054 | 0.282 | 0.02  | 2.762182e-127 | 11 |
| MIR4435-2HG   | ASC IgG   |       |       |               |    |
| 2.452644e-131 | 0.5077338 | 0.352 | 0.035 | 4.372818e-127 | 11 |
| IRF4          | ASC IgG   |       |       |               |    |
| 2.224334e-130 | -1.935371 | 0.24  | 0.471 | 3.965765e-126 | 11 |
| S100A6        | ASC IgG   |       |       |               |    |
| 2.055904e-129 | -1.153017 | 0.094 | 0.343 | 3.665471e-125 | 11 |
| CD48          | ASC IgG   |       |       |               |    |
| 7.091142e-129 | 0.3273544 | 0.155 | 0.005 | 1.26428e-124  | 11 |
| CADM1         | ASC IgG   |       |       |               |    |
| 2.160394e-128 | -1.091368 | 0.075 | 0.299 | 3.851767e-124 | 11 |
| BCL11A        | ASC IgG   |       |       |               |    |
| 2.766436e-128 | -1.080966 | 0.053 | 0.273 | 4.93228e-124  | 11 |
| HHEX          | ASC IgG   |       |       |               |    |
| 1.229937e-127 | 0.5400518 | 0.568 | 0.114 | 2.192854e-123 | 11 |
| MGAT2         | ASC IgG   |       |       |               |    |
| 1.298477e-127 | -1.111283 | 0.086 | 0.312 | 2.315054e-123 | 11 |
| ARHGAP24      | ASC IgG   |       |       |               |    |
| 4.524554e-127 | 0.5326532 | 0.543 | 0.103 | 8.066827e-123 | 11 |
| SURF4         | ASC IgG   |       |       |               |    |
| 4.800924e-127 | 0.5015594 | 0.437 | 0.056 | 8.559568e-123 | 11 |
| C1GALT1C1     | ASC IgG   |       |       |               |    |
| 9.333026e-127 | -1.222662 | 0.694 | 0.754 | 1.663985e-122 | 11 |
| TOMM7         | ASC IgG   |       |       |               |    |
| 1.21809e-126  | -1.055123 | 0.961 | 0.959 | 2.171733e-122 | 11 |
| MT-CYB        | ASC IgG   |       |       |               |    |
| 1.2863e-126   | 0.4787253 | 0.366 | 0.033 | 2.293344e-122 | 11 |
| FNDC3A        | ASC IgG   |       |       |               |    |

|               |           |       |       |               |    |
|---------------|-----------|-------|-------|---------------|----|
| 1.605254e-126 | -1.294878 | 0.23  | 0.443 | 2.862007e-122 | 11 |
| COTL1         | ASC IgG   |       |       |               |    |
| 9.038983e-125 | 0.5485373 | 0.333 | 0.038 | 1.61156e-120  | 11 |
| CCDC144A      | ASC IgG   |       |       |               |    |
| 3.336379e-124 | -1.261413 | 0.466 | 0.599 | 5.94843e-120  | 11 |
| TPM3          | ASC IgG   |       |       |               |    |
| 3.545351e-124 | 0.4768383 | 0.431 | 0.067 | 6.321007e-120 | 11 |
| SLAMF7        | ASC IgG   |       |       |               |    |
| 1.210864e-123 | -1.24374  | 0.728 | 0.77  | 2.158849e-119 | 11 |
| RPL17         | ASC IgG   |       |       |               |    |
| 3.100998e-123 | 0.5567716 | 0.6   | 0.129 | 5.528769e-119 | 11 |
| ARMCX3        | ASC IgG   |       |       |               |    |
| 9.768608e-123 | -1.418205 | 0.739 | 0.787 | 1.741645e-118 | 11 |
| ACTG1         | ASC IgG   |       |       |               |    |
| 2.021622e-122 | -1.179807 | 0.239 | 0.408 | 3.60435e-118  | 11 |
| STX7          | ASC IgG   |       |       |               |    |
| 7.087863e-122 | 0.5459018 | 0.803 | 0.292 | 1.263695e-117 | 11 |
| CNPY2         | ASC IgG   |       |       |               |    |
| 1.282891e-121 | 0.5670568 | 0.655 | 0.173 | 2.287266e-117 | 11 |
| TECR          | ASC IgG   |       |       |               |    |
| 2.588115e-121 | 0.5462469 | 0.614 | 0.141 | 4.61435e-117  | 11 |
| ARFGAP3       | ASC IgG   |       |       |               |    |
| 3.452128e-121 | 0.4673824 | 0.402 | 0.049 | 6.154799e-117 | 11 |
| GMPPA         | ASC IgG   |       |       |               |    |
| 4.039586e-121 | 0.6261176 | 0.608 | 0.155 | 7.202179e-117 | 11 |
| CCDC167       | ASC IgG   |       |       |               |    |
| 5.536558e-121 | 0.5465448 | 0.647 | 0.158 | 9.87113e-117  | 11 |
| SRPRA         | ASC IgG   |       |       |               |    |
| 1.255659e-120 | 0.5755882 | 0.382 | 0.069 | 2.238714e-116 | 11 |
| HCST          | ASC IgG   |       |       |               |    |
| 2.691531e-120 | -1.077661 | 0.893 | 0.869 | 4.79873e-116  | 11 |
| ARPC3         | ASC IgG   |       |       |               |    |
| 7.544755e-120 | -1.709526 | 0.632 | 0.667 | 1.345154e-115 | 11 |
| TUBA1B        | ASC IgG   |       |       |               |    |
| 1.681845e-119 | 0.6204941 | 0.597 | 0.153 | 2.998561e-115 | 11 |
| TOR3A         | ASC IgG   |       |       |               |    |
| 1.95281e-119  | 0.586722  | 0.799 | 0.287 | 3.481666e-115 | 11 |
| CDK2AP2       | ASC IgG   |       |       |               |    |
| 4.029945e-119 | 0.5396705 | 0.519 | 0.083 | 7.184989e-115 | 11 |
| KLF13         | ASC IgG   |       |       |               |    |
| 7.902191e-119 | 0.5761339 | 0.854 | 0.368 | 1.408882e-114 | 11 |
| NDUFC2        | ASC IgG   |       |       |               |    |
| 1.263415e-118 | 0.572196  | 0.994 | 0.986 | 2.252543e-114 | 11 |
| HLA-B         | ASC IgG   |       |       |               |    |
| 1.408205e-118 | -1.118203 | 0.142 | 0.337 | 2.510688e-114 | 11 |
| RIPOR2        | ASC IgG   |       |       |               |    |
| 1.700157e-118 | 1.107566  | 0.821 | 0.488 | 3.031209e-114 | 11 |
| SAT1          | ASC IgG   |       |       |               |    |
| 3.112005e-118 | -1.019761 | 0.092 | 0.295 | 5.548394e-114 | 11 |
| DCK           | ASC IgG   |       |       |               |    |

|               |            |       |       |               |    |
|---------------|------------|-------|-------|---------------|----|
| 3.550152e-118 | -0.9597909 | 0.055 | 0.262 | 6.329566e-114 | 11 |
| LYSMD2        | ASC IgG    |       |       |               |    |
| 4.230139e-116 | 0.6422377  | 0.435 | 0.06  | 7.541915e-112 | 11 |
| RASSF6        | ASC IgG    |       |       |               |    |
| 4.948384e-116 | 0.4629375  | 0.433 | 0.059 | 8.822475e-112 | 11 |
| SLC38A10      | ASC IgG    |       |       |               |    |
| 1.247631e-115 | -0.9941362 | 0.093 | 0.304 | 2.224402e-111 | 11 |
| BLK           | ASC IgG    |       |       |               |    |
| 1.904446e-115 | 0.5654347  | 0.969 | 0.723 | 3.395437e-111 | 11 |
| OST4          | ASC IgG    |       |       |               |    |
| 6.377973e-115 | -1.111656  | 0.116 | 0.335 | 1.137129e-110 | 11 |
| TRBC2         | ASC IgG    |       |       |               |    |
| 2.013502e-114 | 0.6617003  | 0.37  | 0.049 | 3.589874e-110 | 11 |
| RGS16         | ASC IgG    |       |       |               |    |
| 2.335112e-113 | -1.580458  | 0.493 | 0.579 | 4.163272e-109 | 11 |
| TUBB          | ASC IgG    |       |       |               |    |
| 3.592731e-113 | -1.507871  | 0.452 | 0.656 | 6.40548e-109  | 11 |
| RPS4Y1        | ASC IgG    |       |       |               |    |
| 1.15606e-112  | 0.5583092  | 0.892 | 0.456 | 2.061139e-108 | 11 |
| PRDX5         | ASC IgG    |       |       |               |    |
| 2.591364e-112 | -1.193137  | 0.165 | 0.386 | 4.620143e-108 | 11 |
| PDCD4         | ASC IgG    |       |       |               |    |
| 9.65123e-112  | 0.5924917  | 0.95  | 0.623 | 1.720718e-107 | 11 |
| GSTP1         | ASC IgG    |       |       |               |    |
| 1.792706e-111 | 0.5329343  | 0.726 | 0.229 | 3.196216e-107 | 11 |
| OS9           | ASC IgG    |       |       |               |    |
| 2.060337e-111 | -1.176121  | 0.173 | 0.352 | 3.673374e-107 | 11 |
| TRAF3IP3      | ASC IgG    |       |       |               |    |
| 5.751894e-111 | 0.5581207  | 0.819 | 0.371 | 1.025505e-106 | 11 |
| ATP6V0B       | ASC IgG    |       |       |               |    |
| 9.560507e-111 | 0.5432583  | 0.625 | 0.16  | 1.704543e-106 | 11 |
| GORASP2       | ASC IgG    |       |       |               |    |
| 9.829277e-111 | 0.5376851  | 0.705 | 0.227 | 1.752462e-106 | 11 |
| MORF4L2       | ASC IgG    |       |       |               |    |
| 4.7722e-110   | 0.5418032  | 0.648 | 0.159 | 8.508356e-106 | 11 |
| SEC63         | ASC IgG    |       |       |               |    |
| 7.072942e-110 | 0.5383963  | 0.695 | 0.217 | 1.261035e-105 | 11 |
| CCNC          | ASC IgG    |       |       |               |    |
| 9.213413e-110 | -0.8387976 | 0.948 | 0.937 | 1.642659e-105 | 11 |
| EEF2          | ASC IgG    |       |       |               |    |
| 9.732095e-110 | 0.503989   | 0.506 | 0.087 | 1.735135e-105 | 11 |
| SYVN1         | ASC IgG    |       |       |               |    |
| 1.575166e-109 | -0.7129422 | 0.998 | 1     | 2.808364e-105 | 11 |
| MALAT1        | ASC IgG    |       |       |               |    |
| 5.359829e-109 | 0.4239431  | 0.302 | 0.028 | 9.55604e-105  | 11 |
| SLC44A1       | ASC IgG    |       |       |               |    |
| 1.378365e-108 | 0.3462181  | 0.249 | 0.012 | 2.457487e-104 | 11 |
| P2RX1         | ASC IgG    |       |       |               |    |
| 2.491195e-108 | 0.5165335  | 0.629 | 0.158 | 4.441551e-104 | 11 |
| TM9SF2        | ASC IgG    |       |       |               |    |



|               |                |       |               |               |    |
|---------------|----------------|-------|---------------|---------------|----|
| 3.496598e-108 | -1.543315      | 0.314 | 0.431         | 6.234085e-104 | 11 |
| STMN1         | ASC IgG        |       |               |               |    |
| 1.060353e-107 | 0.3242351      | 0.227 | 0.012         | 1.890504e-103 | 11 |
| FICD          | ASC IgG        |       |               |               |    |
| 1.857513e-107 | 2.011854 0.182 | 0.037 | 3.31176e-103  | 11            |    |
| IGLL5         | ASC IgG        |       |               |               |    |
| 1.886631e-107 | 0.3261407      | 0.224 | 0.013         | 3.363674e-103 | 11 |
| MIXL1         | ASC IgG        |       |               |               |    |
| 2.448918e-107 | 0.3707199      | 0.291 | 0.02          | 4.366176e-103 | 11 |
| ARSA          | ASC IgG        |       |               |               |    |
| 3.055338e-107 | -1.089521      | 0.138 | 0.335         | 5.447362e-103 | 11 |
| SMC6          | ASC IgG        |       |               |               |    |
| 3.180981e-107 | -1.56073 0.245 | 0.408 | 5.671371e-103 | 11            |    |
| FABP5         | ASC IgG        |       |               |               |    |
| 4.155703e-107 | 0.4818896      | 0.413 | 0.072         | 7.409202e-103 | 11 |
| GPR160        | ASC IgG        |       |               |               |    |
| 5.980046e-107 | -1.060257      | 0.253 | 0.421         | 1.066182e-102 | 11 |
| ESD           | ASC IgG        |       |               |               |    |
| 6.459065e-107 | 0.6183169      | 0.642 | 0.184         | 1.151587e-102 | 11 |
| IDH2          | ASC IgG        |       |               |               |    |
| 1.376218e-106 | 0.4189318      | 0.374 | 0.046         | 2.453659e-102 | 11 |
| TMEM214       | ASC IgG        |       |               |               |    |
| 1.341286e-104 | 0.5775172      | 0.698 | 0.188         | 2.39138e-100  | 11 |
| HMCE5         | ASC IgG        |       |               |               |    |
| 1.551731e-104 | 0.5129276      | 0.864 | 0.419         | 2.766581e-100 | 11 |
| ZNF706        | ASC IgG        |       |               |               |    |
| 2.238682e-104 | -0.9714509     | 0.937 | 0.898         | 3.991346e-100 | 11 |
| DDX5          | ASC IgG        |       |               |               |    |
| 2.392848e-104 | -1.113673      | 0.171 | 0.351         | 4.266209e-100 | 11 |
| BIRC3         | ASC IgG        |       |               |               |    |
| 2.577994e-104 | -1.161489      | 0.662 | 0.668         | 4.596306e-100 | 11 |
| GDI2          | ASC IgG        |       |               |               |    |
| 5.887959e-104 | -1.078998      | 0.684 | 0.721         | 1.049764e-99  | 11 |
| EIF3F         | ASC IgG        |       |               |               |    |
| 1.199834e-103 | 0.3072643      | 0.222 | 0.012         | 2.139183e-99  | 11 |
| MANEA         | ASC IgG        |       |               |               |    |
| 1.441361e-103 | -1.389974      | 0.795 | 0.747         | 2.569803e-99  | 11 |
| RAN           | ASC IgG        |       |               |               |    |
| 3.790394e-103 | -1.149079      | 0.386 | 0.515         | 6.757894e-99  | 11 |
| C6orf48       | ASC IgG        |       |               |               |    |
| 4.308076e-103 | 0.5357679      | 0.67  | 0.194         | 7.680869e-99  | 11 |
| GNL3          | ASC IgG        |       |               |               |    |
| 4.979952e-102 | 0.5816827      | 0.694 | 0.223         | 8.878756e-98  | 11 |
| DSTN          | ASC IgG        |       |               |               |    |
| 8.944387e-101 | 0.4914376      | 0.514 | 0.105         | 1.594695e-96  | 11 |
| PGRMC2        | ASC IgG        |       |               |               |    |
| 1.768822e-100 | 0.5270336      | 0.481 | 0.092         | 3.153633e-96  | 11 |
| SEMA4A        | ASC IgG        |       |               |               |    |
| 2.212783e-100 | -0.8534543     | 0.963 | 0.939         | 3.945171e-96  | 11 |
| H3F3A         | ASC IgG        |       |               |               |    |

|               |                |       |              |              |    |
|---------------|----------------|-------|--------------|--------------|----|
| 3.505805e-100 | -1.158905      | 0.383 | 0.497        | 6.250499e-96 | 11 |
| SP100         | ASC IgG        |       |              |              |    |
| 4.010069e-100 | 0.5174313      | 0.749 | 0.281        | 7.149553e-96 | 11 |
| ACADVL        | ASC IgG        |       |              |              |    |
| 4.673779e-100 | -0.948654      | 0.935 | 0.901        | 8.33288e-96  | 11 |
| COX7C         | ASC IgG        |       |              |              |    |
| 5.236417e-100 | -1.073707      | 0.248 | 0.398        | 9.336008e-96 | 11 |
| SYPL1         | ASC IgG        |       |              |              |    |
| 9.005752e-100 | -1.332861      | 0.817 | 0.767        | 1.605636e-95 | 11 |
| HMG1          | ASC IgG        |       |              |              |    |
| 1.222157e-99  | 0.471202 0.303 | 0.037 | 2.178983e-95 | 11           |    |
| GADD45A       | ASC IgG        |       |              |              |    |
| 1.660815e-99  | -1.097009      | 0.337 | 0.463        | 2.961068e-95 | 11 |
| SWAP70        | ASC IgG        |       |              |              |    |
| 1.707761e-99  | 0.4487351      | 0.492 | 0.09         | 3.044768e-95 | 11 |
| CTSD          | ASC IgG        |       |              |              |    |
| 2.729795e-99  | 0.4772659      | 0.53  | 0.114        | 4.866951e-95 | 11 |
| LY96          | ASC IgG        |       |              |              |    |
| 2.755176e-99  | -1.104166      | 0.537 | 0.603        | 4.912203e-95 | 11 |
| UBXN1         | ASC IgG        |       |              |              |    |
| 5.441505e-99  | 0.4399001      | 0.466 | 0.086        | 9.70166e-95  | 11 |
| SEC23B        | ASC IgG        |       |              |              |    |
| 6.005034e-99  | 0.4165146      | 0.375 | 0.035        | 1.070638e-94 | 11 |
| VSIR          | ASC IgG        |       |              |              |    |
| 6.81674e-99   | -1.015185      | 0.093 | 0.284        | 1.215357e-94 | 11 |
| IFITM2        | ASC IgG        |       |              |              |    |
| 9.306474e-99  | -0.9475481     | 0.912 | 0.895        | 1.659251e-94 | 11 |
| SLC25A6       | ASC IgG        |       |              |              |    |
| 1.310523e-98  | -1.123192      | 0.697 | 0.718        | 2.336531e-94 | 11 |
| EIF4A2        | ASC IgG        |       |              |              |    |
| 2.287662e-98  | -1.027461      | 0.059 | 0.216        | 4.078673e-94 | 11 |
| PLAC8         | ASC IgG        |       |              |              |    |
| 5.492083e-98  | 0.4780892      | 0.69  | 0.21         | 9.791836e-94 | 11 |
| SRP54         | ASC IgG        |       |              |              |    |
| 1.445189e-97  | -1.00982 0.082 | 0.257 | 2.576627e-93 | 11           |    |
| FCMR          | ASC IgG        |       |              |              |    |
| 2.204355e-97  | -1.17162 0.593 | 0.636 | 3.930145e-93 | 11           |    |
| GPX4          | ASC IgG        |       |              |              |    |
| 2.980112e-97  | -0.9516458     | 0.124 | 0.293        | 5.313241e-93 | 11 |
| BCAS4         | ASC IgG        |       |              |              |    |
| 1.781146e-96  | 0.6796389      | 0.39  | 0.077        | 3.175605e-92 | 11 |
| LINC01480     | ASC IgG        |       |              |              |    |
| 2.845626e-96  | 0.4149425      | 0.911 | 0.472        | 5.073467e-92 | 11 |
| RPS27L        | ASC IgG        |       |              |              |    |
| 5.763816e-96  | -1.067075      | 0.852 | 0.797        | 1.027631e-91 | 11 |
| SUM02         | ASC IgG        |       |              |              |    |
| 3.793404e-95  | 0.4352649      | 0.369 | 0.053        | 6.763261e-91 | 11 |
| STT3A         | ASC IgG        |       |              |              |    |
| 5.939218e-95  | -0.9489831     | 0.084 | 0.249        | 1.058903e-90 | 11 |
| RASGRP2       | ASC IgG        |       |              |              |    |

|              |                  |       |       |              |    |
|--------------|------------------|-------|-------|--------------|----|
| 2.965303e-94 | 0.5396163        | 0.687 | 0.242 | 5.286839e-90 | 11 |
|              | C12orf57 ASC IgG |       |       |              |    |
| 3.828551e-94 | 0.4125689        | 0.376 | 0.054 | 6.825924e-90 | 11 |
|              | LARP1B ASC IgG   |       |       |              |    |
| 4.181749e-94 | 0.3970011        | 0.324 | 0.034 | 7.45564e-90  | 11 |
|              | CREB3L2 ASC IgG  |       |       |              |    |
| 4.617333e-94 | -1.238028        | 0.185 | 0.357 | 8.232242e-90 | 11 |
|              | TXNIP ASC IgG    |       |       |              |    |
| 5.450417e-94 | 0.3523907        | 0.281 | 0.029 | 9.717548e-90 | 11 |
|              | ZFAT ASC IgG     |       |       |              |    |
| 6.458025e-94 | 0.3021229        | 0.871 | 0.451 | 1.151401e-89 | 11 |
|              | CD63 ASC IgG     |       |       |              |    |
| 4.680594e-93 | -0.743053        | 0.979 | 0.961 | 8.345032e-89 | 11 |
|              | OAZ1 ASC IgG     |       |       |              |    |
| 5.789581e-93 | -0.8335607       | 0.055 | 0.224 | 1.032224e-88 | 11 |
|              | LY86 ASC IgG     |       |       |              |    |
| 8.724753e-93 | 0.4009978        | 0.385 | 0.055 | 1.555536e-88 | 11 |
|              | SLC39A7 ASC IgG  |       |       |              |    |
| 1.048608e-92 | 0.361614         | 0.291 | 0.027 | 1.869562e-88 | 11 |
|              | MCEE ASC IgG     |       |       |              |    |
| 2.556112e-92 | -1.092528        | 0.545 | 0.596 | 4.557292e-88 | 11 |
|              | ST13 ASC IgG     |       |       |              |    |
| 5.165886e-92 | 0.4525761        | 0.447 | 0.077 | 9.210257e-88 | 11 |
|              | PNOC ASC IgG     |       |       |              |    |
| 1.294026e-91 | 0.4852163        | 0.699 | 0.226 | 2.30712e-87  | 11 |
|              | ZBTB80S ASC IgG  |       |       |              |    |
| 3.450559e-91 | -0.8192981       | 0.041 | 0.199 | 6.152001e-87 | 11 |
|              | FAM129C ASC IgG  |       |       |              |    |
| 1.372987e-90 | 0.4348031        | 0.607 | 0.156 | 2.447898e-86 | 11 |
|              | ARL1 ASC IgG     |       |       |              |    |
| 1.556478e-90 | -1.045063        | 0.267 | 0.402 | 2.775045e-86 | 11 |
|              | BLOC1S2 ASC IgG  |       |       |              |    |
| 4.622596e-90 | -1.072341        | 0.369 | 0.472 | 8.241626e-86 | 11 |
|              | SNRPF ASC IgG    |       |       |              |    |
| 4.688481e-90 | 0.4588821        | 0.618 | 0.166 | 8.359093e-86 | 11 |
|              | MESD ASC IgG     |       |       |              |    |
| 7.148707e-90 | -0.7652082       | 0.033 | 0.2   | 1.274543e-85 | 11 |
|              | AFF3 ASC IgG     |       |       |              |    |
| 2.347903e-89 | 0.3064808        | 0.158 | 0.011 | 4.186077e-85 | 11 |
|              | CAMP ASC IgG     |       |       |              |    |
| 2.370327e-89 | 0.4556798        | 0.523 | 0.142 | 4.226057e-85 | 11 |
|              | MPC1 ASC IgG     |       |       |              |    |
| 4.026765e-89 | 0.4497485        | 0.602 | 0.162 | 7.17932e-85  | 11 |
|              | ERGIC2 ASC IgG   |       |       |              |    |
| 6.988059e-89 | 0.4896627        | 0.652 | 0.17  | 1.245901e-84 | 11 |
|              | PLPP5 ASC IgG    |       |       |              |    |
| 3.177337e-88 | -1.080856        | 0.45  | 0.535 | 5.664874e-84 | 11 |
|              | RBMX ASC IgG     |       |       |              |    |
| 5.311538e-88 | 0.3000981        | 0.23  | 0.022 | 9.469942e-84 | 11 |
|              | SLC03A1 ASC IgG  |       |       |              |    |

|              |                |       |              |              |    |
|--------------|----------------|-------|--------------|--------------|----|
| 8.796179e-88 | -1.136882      | 0.233 | 0.387        | 1.568271e-83 | 11 |
| CD44         | ASC IgG        |       |              |              |    |
| 1.431367e-87 | 0.4871395      | 0.852 | 0.44         | 2.551985e-83 | 11 |
| VCP          | ASC IgG        |       |              |              |    |
| 2.284692e-87 | -1.069566      | 0.545 | 0.579        | 4.073377e-83 | 11 |
| POU2F2       | ASC IgG        |       |              |              |    |
| 3.243543e-87 | -1.02812 0.713 | 0.697 | 5.782914e-83 | 11           |    |
| MYL12B       | ASC IgG        |       |              |              |    |
| 5.277425e-87 | -0.9503372     | 0.134 | 0.29         | 9.409121e-83 | 11 |
| SP110        | ASC IgG        |       |              |              |    |
| 6.947278e-87 | 0.4211664      | 0.486 | 0.115        | 1.23863e-82  | 11 |
| ISOC2        | ASC IgG        |       |              |              |    |
| 7.172842e-87 | 0.3938424      | 0.402 | 0.056        | 1.278846e-82 | 11 |
| IFNAR2       | ASC IgG        |       |              |              |    |
| 3.037018e-86 | 0.3981302      | 0.33  | 0.05         | 5.414699e-82 | 11 |
| SLC1A4       | ASC IgG        |       |              |              |    |
| 1.456537e-85 | -1.053305      | 0.67  | 0.677        | 2.59686e-81  | 11 |
| EIF3L        | ASC IgG        |       |              |              |    |
| 2.29061e-85  | -1.0935 0.595  | 0.621 | 4.083928e-81 | 11           |    |
| ACTR3        | ASC IgG        |       |              |              |    |
| 6.241228e-85 | -1.153037      | 0.192 | 0.355        | 1.112749e-80 | 11 |
| LY6E         | ASC IgG        |       |              |              |    |
| 1.333585e-84 | -0.9887701     | 0.314 | 0.405        | 2.377649e-80 | 11 |
| MBD4         | ASC IgG        |       |              |              |    |
| 1.478459e-84 | -1.227452      | 0.806 | 0.76         | 2.635945e-80 | 11 |
| PKM          | ASC IgG        |       |              |              |    |
| 1.662441e-84 | 0.3604326      | 0.322 | 0.035        | 2.963966e-80 | 11 |
| TMEM39A      | ASC IgG        |       |              |              |    |
| 1.863106e-84 | -0.8771037     | 0.086 | 0.237        | 3.321732e-80 | 11 |
| IL4R         | ASC IgG        |       |              |              |    |
| 2.219846e-84 | 0.4236402      | 0.593 | 0.169        | 3.957764e-80 | 11 |
| NUDT22       | ASC IgG        |       |              |              |    |
| 8.595613e-84 | 0.4301501      | 0.918 | 0.557        | 1.532512e-79 | 11 |
| UQCRQ        | ASC IgG        |       |              |              |    |
| 8.652909e-84 | 0.5056301      | 0.677 | 0.214        | 1.542727e-79 | 11 |
| UBE2G1       | ASC IgG        |       |              |              |    |
| 1.377304e-83 | -0.8952857     | 0.174 | 0.318        | 2.455596e-79 | 11 |
| LYN          | ASC IgG        |       |              |              |    |
| 1.39753e-83  | 0.4093044      | 0.743 | 0.307        | 2.491657e-79 | 11 |
| PRDX2        | ASC IgG        |       |              |              |    |
| 1.468955e-83 | -1.147338      | 0.705 | 0.693        | 2.618999e-79 | 11 |
| EZR          | ASC IgG        |       |              |              |    |
| 7.915163e-83 | -0.8017175     | 0.036 | 0.178        | 1.411194e-78 | 11 |
| MARCH1       | ASC IgG        |       |              |              |    |
| 1.121396e-82 | -1.104091      | 0.658 | 0.641        | 1.999338e-78 | 11 |
| HNRNPM       | ASC IgG        |       |              |              |    |
| 5.629174e-82 | 0.388731 0.759 | 0.3   | 1.003625e-77 | 11           |    |
| AKR1A1       | ASC IgG        |       |              |              |    |
| 5.801176e-82 | -0.9832765     | 0.867 | 0.803        | 1.034292e-77 | 11 |
| HNRNPK       | ASC IgG        |       |              |              |    |

|              |                |       |              |              |     |
|--------------|----------------|-------|--------------|--------------|-----|
| 9.227868e-82 | -0.8340849     | 0.074 | 0.215        | 1.645237e-77 | 11  |
| FAM111B      | ASC IgG        |       |              |              |     |
| 2.283868e-81 | -0.9819888     | 0.19  | 0.346        | 4.071909e-77 | 11  |
| PKIG         | ASC IgG        |       |              |              |     |
| 2.289132e-81 | 0.412376 0.516 | 0.113 | 4.081293e-77 | 11           |     |
| B4GALT3      | ASC IgG        |       |              |              |     |
| 2.375686e-81 | 0.3164839      | 0.241 | 0.021        | 4.23561e-77  | 11  |
| LAX1         | ASC IgG        |       |              |              |     |
| 4.133447e-81 | -1.059365      | 0.386 | 0.474        | 7.369523e-77 | 11  |
| GPSM3        | ASC IgG        |       |              |              |     |
| 4.98096e-81  | -1.017413      | 0.329 | 0.428        | 8.880553e-77 | 11  |
| CD40         | ASC IgG        |       |              |              |     |
| 1.496903e-80 | 0.4368082      | 0.633 | 0.215        | 2.668828e-76 | 11  |
| TIMM17A      | ASC IgG        |       |              |              |     |
| 2.457515e-80 | -0.9517545     | 0.265 | 0.368        | 4.381503e-76 | 11  |
| SNAP23       | ASC IgG        |       |              |              |     |
| 3.310965e-80 | -0.88998 0.061 | 0.216 | 5.903119e-76 | 11           | LBH |
| ASC IgG      |                |       |              |              |     |
| 3.76896e-80  | -0.822127      | 0.956 | 0.927        | 6.71968e-76  | 11  |
| EEF1D        | ASC IgG        |       |              |              |     |
| 4.567253e-80 | 0.3707445      | 0.726 | 0.262        | 8.142955e-76 | 11  |
| AUP1         | ASC IgG        |       |              |              |     |
| 1.303632e-79 | -0.9447158     | 0.317 | 0.423        | 2.324246e-75 | 11  |
| FAM49B       | ASC IgG        |       |              |              |     |
| 2.689868e-79 | -0.9563102     | 0.055 | 0.225        | 4.795766e-75 | 11  |
| GBP2         | ASC IgG        |       |              |              |     |
| 4.643398e-79 | 0.4029124      | 0.496 | 0.109        | 8.278714e-75 | 11  |
| USO1         | ASC IgG        |       |              |              |     |
| 1.06358e-78  | 0.3870477      | 0.416 | 0.069        | 1.896256e-74 | 11  |
| COPG1        | ASC IgG        |       |              |              |     |
| 1.826232e-78 | 0.3174126      | 0.325 | 0.04         | 3.255989e-74 | 11  |
| TBL2         | ASC IgG        |       |              |              |     |
| 2.487519e-78 | -1.041627      | 0.757 | 0.717        | 4.434997e-74 | 11  |
| ATP5MC2      | ASC IgG        |       |              |              |     |
| 3.115036e-78 | -1.060925      | 0.538 | 0.56         | 5.553798e-74 | 11  |
| YHAZ         | ASC IgG        |       |              |              |     |
| 7.331864e-78 | -0.9464924     | 0.287 | 0.387        | 1.307198e-73 | 11  |
| EVL          | ASC IgG        |       |              |              |     |
| 1.071314e-77 | 0.3176853      | 0.207 | 0.019        | 1.910046e-73 | 11  |
| SPINK2       | ASC IgG        |       |              |              |     |
| 1.161305e-77 | 0.3815275      | 0.435 | 0.075        | 2.07049e-73  | 11  |
| GUSB         | ASC IgG        |       |              |              |     |
| 1.949237e-77 | 0.3922779      | 0.831 | 0.347        | 3.475294e-73 | 11  |
| TPD52        | ASC IgG        |       |              |              |     |
| 2.19274e-77  | 0.4192056      | 0.312 | 0.065        | 3.909436e-73 | 11  |
| SOCS3        | ASC IgG        |       |              |              |     |
| 2.219176e-77 | -1.019959      | 0.717 | 0.668        | 3.956568e-73 | 11  |
| SNX3         | ASC IgG        |       |              |              |     |
| 2.403805e-77 | 0.4376777      | 0.547 | 0.135        | 4.285744e-73 | 11  |
| SEC14L1      | ASC IgG        |       |              |              |     |

|              |            |       |       |              |    |
|--------------|------------|-------|-------|--------------|----|
| 3.056177e-77 | 0.3219637  | 0.232 | 0.032 | 5.448857e-73 | 11 |
| KCNK12       | ASC IgG    |       |       |              |    |
| 3.945856e-77 | -0.8100668 | 0.068 | 0.21  | 7.035067e-73 | 11 |
| PRKCB        | ASC IgG    |       |       |              |    |
| 5.472828e-77 | 0.4003957  | 0.637 | 0.204 | 9.757506e-73 | 11 |
| CANX         | ASC IgG    |       |       |              |    |
| 5.5045e-77   | -0.992714  | 0.277 | 0.366 | 9.813972e-73 | 11 |
| RCSD1        | ASC IgG    |       |       |              |    |
| 6.13546e-77  | 0.5199458  | 0.696 | 0.266 | 1.093891e-72 | 11 |
| STK17B       | ASC IgG    |       |       |              |    |
| 8.447595e-77 | 0.3265426  | 0.278 | 0.032 | 1.506122e-72 | 11 |
| NEDD9        | ASC IgG    |       |       |              |    |
| 1.086462e-76 | -0.7950174 | 0.944 | 0.903 | 1.937053e-72 | 11 |
| SRP14        | ASC IgG    |       |       |              |    |
| 1.257843e-76 | 0.3712143  | 0.458 | 0.087 | 2.242608e-72 | 11 |
| IKBIP        | ASC IgG    |       |       |              |    |
| 2.572797e-76 | 0.3196532  | 0.279 | 0.026 | 4.587041e-72 | 11 |
| PGM3         | ASC IgG    |       |       |              |    |
| 2.789122e-76 | 0.3483953  | 0.348 | 0.054 | 4.972726e-72 | 11 |
| UAP1         | ASC IgG    |       |       |              |    |
| 3.641658e-76 | 0.4200704  | 0.692 | 0.254 | 6.492712e-72 | 11 |
| GRN          | ASC IgG    |       |       |              |    |
| 5.769103e-76 | -1.111468  | 0.575 | 0.605 | 1.028573e-71 | 11 |
| CDC42        | ASC IgG    |       |       |              |    |
| 1.663963e-75 | -0.8680355 | 0.184 | 0.315 | 2.966679e-71 | 11 |
| PNRC2        | ASC IgG    |       |       |              |    |
| 1.842164e-75 | 0.4233517  | 0.665 | 0.246 | 3.284395e-71 | 11 |
| CDV3         | ASC IgG    |       |       |              |    |
| 2.42867e-75  | -1.582931  | 0.144 | 0.291 | 4.330076e-71 | 11 |
| MIR155HG     | ASC IgG    |       |       |              |    |
| 2.779481e-75 | -1.003862  | 0.574 | 0.587 | 4.955537e-71 | 11 |
| PRR13        | ASC IgG    |       |       |              |    |
| 4.009558e-75 | -1.167272  | 0.816 | 0.746 | 7.14864e-71  | 11 |
| HSP90AA1     | ASC IgG    |       |       |              |    |
| 1.5418e-74   | 0.3637333  | 0.356 | 0.057 | 2.748875e-70 | 11 |
| MAGT1        | ASC IgG    |       |       |              |    |
| 2.443597e-74 | 0.4072986  | 0.569 | 0.15  | 4.35669e-70  | 11 |
| ST6GAL1      | ASC IgG    |       |       |              |    |
| 2.712573e-74 | 0.311543   | 0.274 | 0.029 | 4.836247e-70 | 11 |
| ACP2         | ASC IgG    |       |       |              |    |
| 3.578775e-74 | 0.3900001  | 0.393 | 0.08  | 6.380599e-70 | 11 |
| ATF6         | ASC IgG    |       |       |              |    |
| 4.123253e-74 | -1.091858  | 0.565 | 0.572 | 7.351348e-70 | 11 |
| SNRPE        | ASC IgG    |       |       |              |    |
| 5.783706e-74 | 0.3243588  | 0.291 | 0.046 | 1.031177e-69 | 11 |
| CDKN2C       | ASC IgG    |       |       |              |    |
| 9.903556e-74 | -0.9997709 | 0.447 | 0.508 | 1.765705e-69 | 11 |
| FDFT1        | ASC IgG    |       |       |              |    |
| 1.379415e-73 | -0.8894842 | 0.169 | 0.314 | 2.459359e-69 | 11 |
| SERPINB1     | ASC IgG    |       |       |              |    |

|              |            |       |       |              |    |
|--------------|------------|-------|-------|--------------|----|
| 1.635279e-73 | 0.4092603  | 0.664 | 0.215 | 2.915539e-69 | 11 |
| ADI1         | ASC IgG    |       |       |              |    |
| 1.822829e-73 | -0.9583169 | 0.291 | 0.395 | 3.249922e-69 | 11 |
| FNBP1        | ASC IgG    |       |       |              |    |
| 3.015514e-73 | 0.3926731  | 0.599 | 0.196 | 5.37636e-69  | 11 |
| SND1         | ASC IgG    |       |       |              |    |
| 1.472683e-71 | -1.112899  | 0.712 | 0.679 | 2.625647e-67 | 11 |
| SRSF3        | ASC IgG    |       |       |              |    |
| 1.497389e-71 | -0.8122556 | 0.98  | 0.976 | 2.669695e-67 | 11 |
| FTH1         | ASC IgG    |       |       |              |    |
| 4.064771e-71 | -1.036158  | 0.591 | 0.61  | 7.24708e-67  | 11 |
| RSL24D1      | ASC IgG    |       |       |              |    |
| 1.172006e-70 | -0.9866727 | 0.412 | 0.478 | 2.08957e-66  | 11 |
| FUS          | ASC IgG    |       |       |              |    |
| 1.395252e-70 | -1.100932  | 0.851 | 0.772 | 2.487594e-66 | 11 |
| HLA-DPB1     | ASC IgG    |       |       |              |    |
| 1.438922e-70 | -0.9370586 | 0.615 | 0.603 | 2.565454e-66 | 11 |
| LSM7         | ASC IgG    |       |       |              |    |
| 1.554622e-70 | -0.928847  | 0.241 | 0.369 | 2.771736e-66 | 11 |
| LRRFIP1      | ASC IgG    |       |       |              |    |
| 1.880959e-70 | -0.9445515 | 0.277 | 0.377 | 3.353561e-66 | 11 |
| LCP1         | ASC IgG    |       |       |              |    |
| 2.028828e-70 | 0.3927631  | 0.587 | 0.171 | 3.617197e-66 | 11 |
| TRABD        | ASC IgG    |       |       |              |    |
| 2.794721e-70 | -0.7705916 | 0.12  | 0.252 | 4.982708e-66 | 11 |
| OFD1         | ASC IgG    |       |       |              |    |
| 3.618172e-70 | -0.8885913 | 0.215 | 0.323 | 6.450839e-66 | 11 |
| LTA4H        | ASC IgG    |       |       |              |    |
| 1.644401e-69 | -0.9954055 | 0.501 | 0.525 | 2.931803e-65 | 11 |
| SYF2         | ASC IgG    |       |       |              |    |
| 4.81352e-69  | 0.3700372  | 0.211 | 0.028 | 8.582024e-65 | 11 |
| GPR137B      | ASC IgG    |       |       |              |    |
| 1.248225e-68 | -0.9753202 | 0.571 | 0.572 | 2.22546e-64  | 11 |
| EIF3D        | ASC IgG    |       |       |              |    |
| 2.206784e-68 | 0.344157   | 0.359 | 0.061 | 3.934474e-64 | 11 |
| MAGED1       | ASC IgG    |       |       |              |    |
| 3.113903e-68 | 0.3432484  | 0.946 | 0.7   | 5.551778e-64 | 11 |
| COX7A2       | ASC IgG    |       |       |              |    |
| 3.658794e-68 | -1.036884  | 0.606 | 0.606 | 6.523265e-64 | 11 |
| PPDPF        | ASC IgG    |       |       |              |    |
| 4.499285e-68 | -1.377893  | 0.777 | 0.713 | 8.021775e-64 | 11 |
| EN01         | ASC IgG    |       |       |              |    |
| 8.156375e-68 | -1.034506  | 0.594 | 0.602 | 1.4542e-63   | 11 |
| ARF6         | ASC IgG    |       |       |              |    |
| 1.468253e-67 | -1.026691  | 0.201 | 0.276 | 2.617748e-63 | 11 |
| KLF2         | ASC IgG    |       |       |              |    |
| 1.646327e-67 | -0.8207916 | 0.877 | 0.829 | 2.935237e-63 | 11 |
| UQCRB        | ASC IgG    |       |       |              |    |
| 6.179529e-67 | 0.3173601  | 0.369 | 0.066 | 1.101748e-62 | 11 |
| YIPF2        | ASC IgG    |       |       |              |    |

|              |                |       |              |              |    |
|--------------|----------------|-------|--------------|--------------|----|
| 2.015133e-66 | -0.9664059     | 0.812 | 0.744        | 3.592781e-62 | 11 |
| SNRPD2       | ASC IgG        |       |              |              |    |
| 3.862601e-66 | -0.9036743     | 0.105 | 0.241        | 6.886631e-62 | 11 |
| CAPG         | ASC IgG        |       |              |              |    |
| 5.74423e-66  | -0.7953383     | 0.188 | 0.292        | 1.024139e-61 | 11 |
| RRAS2        | ASC IgG        |       |              |              |    |
| 5.958631e-66 | -0.6742207     | 0.078 | 0.189        | 1.062364e-61 | 11 |
| CDCA7L       | ASC IgG        |       |              |              |    |
| 5.969528e-66 | -0.8929227     | 0.341 | 0.417        | 1.064307e-61 | 11 |
| HDAC1        | ASC IgG        |       |              |              |    |
| 8.89085e-66  | -1.018288      | 0.358 | 0.448        | 1.58515e-61  | 11 |
| KLF6         | ASC IgG        |       |              |              |    |
| 1.03554e-65  | -0.7769574     | 0.054 | 0.18         | 1.846265e-61 | 11 |
| BCL2A1       | ASC IgG        |       |              |              |    |
| 1.489243e-65 | 0.3371 0.462   | 0.112 | 2.655171e-61 | 11           |    |
| SLC52A2      | ASC IgG        |       |              |              |    |
| 3.52671e-65  | -0.6262326     | 0.05  | 0.17         | 6.287772e-61 | 11 |
| SNX10        | ASC IgG        |       |              |              |    |
| 3.617857e-65 | 0.3564119      | 0.445 | 0.097        | 6.450277e-61 | 11 |
| SEC31A       | ASC IgG        |       |              |              |    |
| 3.786732e-65 | 0.3351197      | 0.337 | 0.057        | 6.751365e-61 | 11 |
| MXD4         | ASC IgG        |       |              |              |    |
| 3.94999e-65  | -0.8420507     | 0.215 | 0.317        | 7.042437e-61 | 11 |
| SPI1         | ASC IgG        |       |              |              |    |
| 4.327177e-65 | -1.174564      | 0.804 | 0.734        | 7.714923e-61 | 11 |
| HSPA8        | ASC IgG        |       |              |              |    |
| 7.385335e-65 | 0.3581254      | 0.769 | 0.318        | 1.316731e-60 | 11 |
| CCM2         | ASC IgG        |       |              |              |    |
| 1.061761e-64 | -0.880367      | 0.226 | 0.321        | 1.893014e-60 | 11 |
| SNHG7        | ASC IgG        |       |              |              |    |
| 4.222812e-64 | 0.312664 0.413 | 0.087 | 7.528851e-60 | 11           |    |
| ALG3         | ASC IgG        |       |              |              |    |
| 5.828401e-64 | -1.033453      | 0.661 | 0.615        | 1.039146e-59 | 11 |
| SERBP1       | ASC IgG        |       |              |              |    |
| 7.445257e-64 | 0.3369594      | 0.544 | 0.148        | 1.327415e-59 | 11 |
| YIPF3        | ASC IgG        |       |              |              |    |
| 8.010176e-64 | 0.3405011      | 0.746 | 0.32         | 1.428134e-59 | 11 |
| SRP19        | ASC IgG        |       |              |              |    |
| 8.57172e-64  | -0.7933524     | 0.143 | 0.27         | 1.528252e-59 | 11 |
| ALOX5AP      | ASC IgG        |       |              |              |    |
| 9.676994e-64 | 0.3414524      | 0.453 | 0.108        | 1.725311e-59 | 11 |
| GOSR2        | ASC IgG        |       |              |              |    |
| 3.483977e-63 | -0.949462      | 0.387 | 0.447        | 6.211582e-59 | 11 |
| FBL          | ASC IgG        |       |              |              |    |
| 4.598336e-63 | 0.3312073      | 0.676 | 0.238        | 8.198373e-59 | 11 |
| IER3IP1      | ASC IgG        |       |              |              |    |
| 7.358179e-63 | -0.8696498     | 0.873 | 0.804        | 1.31189e-58  | 11 |
| HINT1        | ASC IgG        |       |              |              |    |
| 7.599148e-63 | -1.113685      | 0.454 | 0.495        | 1.354852e-58 | 11 |
| FXVD5        | ASC IgG        |       |              |              |    |



|              |            |       |       |              |     |
|--------------|------------|-------|-------|--------------|-----|
| 7.785849e-63 | 0.3106586  | 0.253 | 0.033 | 1.388139e-58 | 11  |
| MAN1A1       | ASC IgG    |       |       |              |     |
| 1.389197e-62 | -0.9486267 | 0.602 | 0.593 | 2.476799e-58 | 11  |
| HNRNPU       | ASC IgG    |       |       |              |     |
| 1.696084e-62 | -0.9348613 | 0.437 | 0.454 | 3.023947e-58 | 11  |
| PTPRC        | ASC IgG    |       |       |              |     |
| 4.824144e-62 | 0.3214079  | 0.732 | 0.306 | 8.600966e-58 | 11  |
| ERGIC3       | ASC IgG    |       |       |              |     |
| 7.475582e-62 | 0.4535613  | 0.949 | 0.738 | 1.332822e-57 | 11  |
| CHCHD2       | ASC IgG    |       |       |              |     |
| 7.639499e-62 | 0.3416661  | 0.546 | 0.159 | 1.362046e-57 | 11  |
| SRP68        | ASC IgG    |       |       |              |     |
| 1.146395e-61 | -0.8843836 | 0.351 | 0.399 | 2.043908e-57 | 11  |
| NUCKS1       | ASC IgG    |       |       |              |     |
| 1.361815e-61 | 0.3480679  | 0.481 | 0.133 | 2.42798e-57  | 11  |
| GPAA1        | ASC IgG    |       |       |              |     |
| 4.190532e-61 | -0.9391667 | 0.118 | 0.252 | 7.4713e-57   | 11  |
| TNFRSF13B    | ASC IgG    |       |       |              |     |
| 4.795395e-61 | -0.6814353 | 0.044 | 0.175 | 8.54971e-57  | 11  |
| BCL2         | ASC IgG    |       |       |              |     |
| 5.756986e-61 | 0.3337287  | 0.751 | 0.319 | 1.026413e-56 | 11  |
| COPZ1        | ASC IgG    |       |       |              |     |
| 7.023786e-61 | -0.945236  | 0.66  | 0.624 | 1.252271e-56 | 11  |
| HNRNPA0      | ASC IgG    |       |       |              |     |
| 9.355286e-61 | 0.3579929  | 0.613 | 0.21  | 1.667954e-56 | 11  |
| COPB2        | ASC IgG    |       |       |              |     |
| 1.029186e-60 | 0.3598708  | 0.519 | 0.155 | 1.834936e-56 | 11  |
| DEF8         | ASC IgG    |       |       |              |     |
| 1.448304e-60 | -0.9848067 | 0.817 | 0.756 | 2.58218e-56  | 11  |
| MT-ND5       | ASC IgG    |       |       |              |     |
| 2.925423e-60 | 0.3286721  | 0.899 | 0.524 | 5.215737e-56 | 11  |
| SRSF9        | ASC IgG    |       |       |              |     |
| 2.938641e-60 | -0.8660361 | 0.407 | 0.428 | 5.239304e-56 | 11  |
| ANP32A       | ASC IgG    |       |       |              |     |
| 5.396581e-60 | 0.321818   | 0.509 | 0.134 | 9.621564e-56 | 11  |
| ASC IgG      |            |       |       |              | TFG |
| 6.518614e-60 | 0.3089853  | 0.552 | 0.168 | 1.162204e-55 | 11  |
| SDF4         | ASC IgG    |       |       |              |     |
| 8.444625e-60 | -0.8243327 | 0.298 | 0.37  | 1.505592e-55 | 11  |
| MEAF6        | ASC IgG    |       |       |              |     |
| 9.021818e-60 | -0.9151253 | 0.215 | 0.33  | 1.6085e-55   | 11  |
| PMAIP1       | ASC IgG    |       |       |              |     |
| 1.047815e-59 | 0.3217718  | 0.541 | 0.157 | 1.86815e-55  | 11  |
| SAR1A        | ASC IgG    |       |       |              |     |
| 1.756305e-59 | -0.6990435 | 0.063 | 0.187 | 3.131316e-55 | 11  |
| MBP          | ASC IgG    |       |       |              |     |
| 1.912709e-59 | -0.6314642 | 0.073 | 0.178 | 3.410168e-55 | 11  |
| QRSL1        | ASC IgG    |       |       |              |     |
| 2.457096e-59 | 0.3118679  | 0.503 | 0.134 | 4.380756e-55 | 11  |
| WDR45        | ASC IgG    |       |       |              |     |

|              |            |       |       |              |    |
|--------------|------------|-------|-------|--------------|----|
| 2.830537e-59 | -0.7132231 | 0.148 | 0.25  | 5.046565e-55 | 11 |
| CSK          | ASC IgG    |       |       |              |    |
| 5.385677e-59 | -0.8005972 | 0.245 | 0.343 | 9.602124e-55 | 11 |
| EIF2S3       | ASC IgG    |       |       |              |    |
| 6.287156e-59 | 0.3768888  | 0.705 | 0.253 | 1.120937e-54 | 11 |
| FAM3C        | ASC IgG    |       |       |              |    |
| 7.23107e-59  | 0.3141155  | 0.469 | 0.109 | 1.289228e-54 | 11 |
| ATP6AP1      | ASC IgG    |       |       |              |    |
| 4.186316e-58 | -0.983593  | 0.397 | 0.441 | 7.463782e-54 | 11 |
| HMGA1        | ASC IgG    |       |       |              |    |
| 1.25289e-57  | -0.7634024 | 0.173 | 0.274 | 2.233777e-53 | 11 |
| SMS          | ASC IgG    |       |       |              |    |
| 3.823554e-57 | -0.8900313 | 0.285 | 0.34  | 6.817015e-53 | 11 |
| STK17A       | ASC IgG    |       |       |              |    |
| 3.854725e-57 | 0.3147431  | 0.481 | 0.13  | 6.872589e-53 | 11 |
| TMEM205      | ASC IgG    |       |       |              |    |
| 4.01984e-57  | -1.157134  | 0.626 | 0.587 | 7.166974e-53 | 11 |
| MARCKSL1     | ASC IgG    |       |       |              |    |
| 4.548268e-57 | -0.8979249 | 0.752 | 0.676 | 8.109107e-53 | 11 |
| MORF4L1      | ASC IgG    |       |       |              |    |
| 4.600432e-57 | -0.8304114 | 0.232 | 0.321 | 8.20211e-53  | 11 |
| FCRLA        | ASC IgG    |       |       |              |    |
| 8.127123e-57 | 0.329009   | 0.696 | 0.289 | 1.448985e-52 | 11 |
| SRP72        | ASC IgG    |       |       |              |    |
| 1.890517e-56 | -0.6269479 | 0.085 | 0.204 | 3.370603e-52 | 11 |
| NMI          | ASC IgG    |       |       |              |    |
| 3.885258e-56 | -0.6443458 | 0.037 | 0.151 | 6.927026e-52 | 11 |
| ARRDC2       | ASC IgG    |       |       |              |    |
| 6.094804e-56 | -0.8648868 | 0.435 | 0.467 | 1.086643e-51 | 11 |
| ENSA         | ASC IgG    |       |       |              |    |
| 7.028475e-56 | -0.9533188 | 0.075 | 0.201 | 1.253107e-51 | 11 |
| ACP5         | ASC IgG    |       |       |              |    |
| 7.351252e-56 | -0.7680477 | 0.162 | 0.261 | 1.310655e-51 | 11 |
| CNN2         | ASC IgG    |       |       |              |    |
| 8.585572e-56 | -0.9298137 | 0.498 | 0.489 | 1.530722e-51 | 11 |
| CBX3         | ASC IgG    |       |       |              |    |
| 9.00598e-56  | -0.9118539 | 0.253 | 0.329 | 1.605676e-51 | 11 |
| PTPN6        | ASC IgG    |       |       |              |    |
| 1.03845e-55  | 0.3265777  | 0.587 | 0.196 | 1.851453e-51 | 11 |
| MRPS31       | ASC IgG    |       |       |              |    |
| 3.573976e-55 | -0.6851947 | 0.099 | 0.205 | 6.372042e-51 | 11 |
| BIN1         | ASC IgG    |       |       |              |    |
| 5.557141e-55 | -0.5462454 | 0.029 | 0.129 | 9.907827e-51 | 11 |
| ZEB2         | ASC IgG    |       |       |              |    |
| 6.057513e-55 | -1.450304  | 0.173 | 0.266 | 1.079994e-50 | 11 |
| S100A4       | ASC IgG    |       |       |              |    |
| 8.449492e-55 | 0.3944023  | 0.821 | 0.475 | 1.50646e-50  | 11 |
| NEAT1        | ASC IgG    |       |       |              |    |
| 2.260107e-54 | -0.6117032 | 0.066 | 0.18  | 4.029545e-50 | 11 |
| STAT6        | ASC IgG    |       |       |              |    |

|              |                |       |              |              |    |
|--------------|----------------|-------|--------------|--------------|----|
| 2.91869e-54  | -0.927198      | 0.737 | 0.661        | 5.203732e-50 | 11 |
| DBI          | ASC IgG        |       |              |              |    |
| 2.962158e-54 | -0.7474746     | 0.124 | 0.24         | 5.281231e-50 | 11 |
| AC004687.1   | ASC IgG        |       |              |              |    |
| 3.178115e-54 | 0.3035924      | 0.444 | 0.113        | 5.666262e-50 | 11 |
| SCYL1        | ASC IgG        |       |              |              |    |
| 3.376182e-54 | 0.313118 0.624 | 0.234 | 6.019395e-50 | 11           |    |
| MRPL55       | ASC IgG        |       |              |              |    |
| 4.094436e-54 | -0.8859416     | 0.344 | 0.349        | 7.299969e-50 | 11 |
| S100A10      | ASC IgG        |       |              |              |    |
| 4.132421e-54 | -0.9156733     | 0.634 | 0.586        | 7.367693e-50 | 11 |
| HNRNPF       | ASC IgG        |       |              |              |    |
| 1.405423e-53 | -0.8236052     | 0.224 | 0.299        | 2.505728e-49 | 11 |
| PDLIM1       | ASC IgG        |       |              |              |    |
| 1.507178e-53 | -0.8327864     | 0.352 | 0.403        | 2.687149e-49 | 11 |
| RPA3         | ASC IgG        |       |              |              |    |
| 1.761821e-53 | -0.681346      | 0.151 | 0.243        | 3.14115e-49  | 11 |
| MCUB         | ASC IgG        |       |              |              |    |
| 1.76521e-53  | -0.9277692     | 0.599 | 0.564        | 3.147193e-49 | 11 |
| SNRPB        | ASC IgG        |       |              |              |    |
| 2.031577e-53 | -0.6704037     | 0.139 | 0.251        | 3.622099e-49 | 11 |
| HNRNPA1P48   | ASC IgG        |       |              |              |    |
| 4.805875e-53 | 0.4199187      | 0.534 | 0.138        | 8.568395e-49 | 11 |
| BIK          | ASC IgG        |       |              |              |    |
| 4.912614e-53 | -0.6201632     | 0.042 | 0.152        | 8.7587e-49   | 11 |
| CELF2        | ASC IgG        |       |              |              |    |
| 5.262711e-53 | -0.8916858     | 0.278 | 0.347        | 9.382887e-49 | 11 |
| CAST         | ASC IgG        |       |              |              |    |
| 7.577689e-53 | -0.6981945     | 0.148 | 0.244        | 1.351026e-48 | 11 |
| ARHGAP45     | ASC IgG        |       |              |              |    |
| 8.678067e-53 | -0.5784002     | 0.032 | 0.131        | 1.547213e-48 | 11 |
| CD24         | ASC IgG        |       |              |              |    |
| 1.2529e-52   | 0.3183622      | 0.394 | 0.118        | 2.233796e-48 | 11 |
| SLC1A5       | ASC IgG        |       |              |              |    |
| 1.570267e-52 | 0.322047 0.552 | 0.177 | 2.799629e-48 | 11           |    |
| REX02        | ASC IgG        |       |              |              |    |
| 2.113621e-52 | -0.5450266     | 0.037 | 0.145        | 3.768374e-48 | 11 |
| NUB1         | ASC IgG        |       |              |              |    |
| 2.497346e-52 | -0.8534629     | 0.671 | 0.612        | 4.452518e-48 | 11 |
| ARPC5        | ASC IgG        |       |              |              |    |
| 2.763945e-52 | 0.3046786      | 0.77  | 0.316        | 4.927838e-48 | 11 |
| GYPC         | ASC IgG        |       |              |              |    |
| 9.305551e-52 | 0.3108162      | 0.418 | 0.091        | 1.659087e-47 | 11 |
| FBH1         | ASC IgG        |       |              |              |    |
| 1.116452e-51 | -0.6119816     | 0.11  | 0.22         | 1.990523e-47 | 11 |
| HPRT1        | ASC IgG        |       |              |              |    |
| 1.157331e-51 | 0.309439 0.515 | 0.167 | 2.063406e-47 | 11           |    |
| LAP3         | ASC IgG        |       |              |              |    |
| 2.297684e-51 | -0.8365362     | 0.486 | 0.465        | 4.09654e-47  | 11 |
| SF1          | ASC IgG        |       |              |              |    |

|              |            |       |       |              |    |
|--------------|------------|-------|-------|--------------|----|
| 2.898101e-51 | -0.8440807 | 0.34  | 0.398 | 5.167024e-47 | 11 |
| CIB1         | ASC IgG    |       |       |              |    |
| 6.697819e-51 | -0.7889952 | 0.298 | 0.35  | 1.194154e-46 | 11 |
| NASP         | ASC IgG    |       |       |              |    |
| 1.289522e-50 | -0.7265827 | 0.288 | 0.347 | 2.299089e-46 | 11 |
| LSM6         | ASC IgG    |       |       |              |    |
| 2.046114e-50 | 0.3084609  | 0.306 | 0.065 | 3.648016e-46 | 11 |
| FBXW7        | ASC IgG    |       |       |              |    |
| 2.480518e-50 | -0.8519366 | 0.679 | 0.62  | 4.422515e-46 | 11 |
| ARPC1B       | ASC IgG    |       |       |              |    |
| 2.748494e-50 | -0.9168251 | 0.713 | 0.643 | 4.90029e-46  | 11 |
| HNRNPC       | ASC IgG    |       |       |              |    |
| 2.972406e-50 | 0.3555285  | 0.188 | 0.03  | 5.299502e-46 | 11 |
| AREG         | ASC IgG    |       |       |              |    |
| 3.202494e-50 | -0.9696949 | 0.452 | 0.448 | 5.709726e-46 | 11 |
| PNRC1        | ASC IgG    |       |       |              |    |
| 4.624814e-50 | -0.7598963 | 0.214 | 0.288 | 8.24558e-46  | 11 |
| PLEKHF2      | ASC IgG    |       |       |              |    |
| 5.137684e-50 | -0.7963154 | 0.342 | 0.392 | 9.159977e-46 | 11 |
| ARPC4        | ASC IgG    |       |       |              |    |
| 7.568772e-50 | -0.5584027 | 0.096 | 0.186 | 1.349436e-45 | 11 |
| APBB1IP      | ASC IgG    |       |       |              |    |
| 7.782671e-50 | -0.7430796 | 0.104 | 0.198 | 1.387572e-45 | 11 |
| CHPT1        | ASC IgG    |       |       |              |    |
| 1.74076e-49  | -0.8095091 | 0.531 | 0.515 | 3.1036e-45   | 11 |
| CAPZB        | ASC IgG    |       |       |              |    |
| 2.276262e-49 | -0.6786662 | 0.118 | 0.22  | 4.058347e-45 | 11 |
| NFKBIE       | ASC IgG    |       |       |              |    |
| 2.421623e-49 | -0.8588634 | 0.676 | 0.617 | 4.317511e-45 | 11 |
| CLEC2D       | ASC IgG    |       |       |              |    |
| 3.055657e-49 | -0.6658189 | 0.143 | 0.235 | 5.44793e-45  | 11 |
| ZNF581       | ASC IgG    |       |       |              |    |
| 5.567637e-49 | -0.5896491 | 0.038 | 0.125 | 9.926541e-45 | 11 |
| AL139020.1   | ASC IgG    |       |       |              |    |
| 7.370194e-49 | -0.8857871 | 0.228 | 0.298 | 1.314032e-44 | 11 |
| NFKBIA       | ASC IgG    |       |       |              |    |
| 7.475755e-49 | -0.4998539 | 0.017 | 0.114 | 1.332852e-44 | 11 |
| SESN3        | ASC IgG    |       |       |              |    |
| 1.223919e-48 | -0.7730107 | 0.249 | 0.322 | 2.182125e-44 | 11 |
| RHOG         | ASC IgG    |       |       |              |    |
| 1.858819e-48 | -0.866641  | 0.796 | 0.696 | 3.314088e-44 | 11 |
| CCNI         | ASC IgG    |       |       |              |    |
| 2.500662e-48 | -0.5047394 | 0.071 | 0.177 | 4.458429e-44 | 11 |
| NUDT1        | ASC IgG    |       |       |              |    |
| 4.479305e-48 | -0.7565374 | 0.335 | 0.357 | 7.986152e-44 | 11 |
| RAB11A       | ASC IgG    |       |       |              |    |
| 1.67166e-47  | -1.103956  | 0.465 | 0.455 | 2.980403e-43 | 11 |
| JUNB         | ASC IgG    |       |       |              |    |
| 1.843247e-47 | -0.7416146 | 0.936 | 0.868 | 3.286325e-43 | 11 |
| ARPC2        | ASC IgG    |       |       |              |    |

|              |            |       |       |              |    |
|--------------|------------|-------|-------|--------------|----|
| 1.859524e-47 | -0.6609577 | 0.101 | 0.192 | 3.315345e-43 | 11 |
| IFNGR1       | ASC IgG    |       |       |              |    |
| 3.089862e-47 | -0.9887346 | 0.527 | 0.483 | 5.508915e-43 | 11 |
| RANBP1       | ASC IgG    |       |       |              |    |
| 3.406315e-47 | -0.7073148 | 0.246 | 0.311 | 6.07312e-43  | 11 |
| PGLS         | ASC IgG    |       |       |              |    |
| 4.395984e-47 | -0.8850708 | 0.298 | 0.336 | 7.8376e-43   | 11 |
| DUT          | ASC IgG    |       |       |              |    |
| 5.559515e-47 | -0.7797214 | 0.926 | 0.88  | 9.91206e-43  | 11 |
| MT-ND1       | ASC IgG    |       |       |              |    |
| 1.262633e-46 | -0.7587885 | 0.256 | 0.315 | 2.251148e-42 | 11 |
| ATP2B1       | ASC IgG    |       |       |              |    |
| 1.742332e-46 | -0.7152059 | 0.211 | 0.292 | 3.106403e-42 | 11 |
| DCTPP1       | ASC IgG    |       |       |              |    |
| 2.023556e-46 | -0.788004  | 0.279 | 0.338 | 3.607798e-42 | 11 |
| ACAT2        | ASC IgG    |       |       |              |    |
| 2.111228e-46 | -0.7580157 | 0.334 | 0.367 | 3.764108e-42 | 11 |
| HADHA        | ASC IgG    |       |       |              |    |
| 3.152706e-46 | -0.8707286 | 0.711 | 0.624 | 5.62096e-42  | 11 |
| SELENOH      | ASC IgG    |       |       |              |    |
| 3.268143e-46 | -0.9119871 | 0.461 | 0.452 | 5.826773e-42 | 11 |
| ARL6IP1      | ASC IgG    |       |       |              |    |
| 4.246977e-46 | -0.4862163 | 0.038 | 0.133 | 7.571935e-42 | 11 |
| UVRAG        | ASC IgG    |       |       |              |    |
| 5.030201e-46 | -0.5271159 | 0.022 | 0.108 | 8.968346e-42 | 11 |
| C1orf162     | ASC IgG    |       |       |              |    |
| 5.284075e-46 | -0.8008827 | 0.454 | 0.445 | 9.420977e-42 | 11 |
| YWHAQ        | ASC IgG    |       |       |              |    |
| 6.318312e-46 | -1.640343  | 0.295 | 0.303 | 1.126492e-41 | 11 |
| HMGB2        | ASC IgG    |       |       |              |    |
| 8.604395e-46 | 0.300216   | 0.413 | 0.114 | 1.534078e-41 | 11 |
| LM04         | ASC IgG    |       |       |              |    |
| 1.201356e-45 | -0.4336557 | 0.019 | 0.107 | 2.141897e-41 | 11 |
| TRAF5        | ASC IgG    |       |       |              |    |
| 1.347652e-45 | -0.7988124 | 0.458 | 0.439 | 2.402729e-41 | 11 |
| RHOH         | ASC IgG    |       |       |              |    |
| 2.319874e-45 | -0.8753754 | 0.654 | 0.592 | 4.136103e-41 | 11 |
| TBCA         | ASC IgG    |       |       |              |    |
| 7.662173e-45 | -0.6268015 | 0.057 | 0.155 | 1.366089e-40 | 11 |
| NFKBID       | ASC IgG    |       |       |              |    |
| 9.734693e-45 | -0.7078249 | 0.231 | 0.291 | 1.735598e-40 | 11 |
| PFDN4        | ASC IgG    |       |       |              |    |
| 1.189812e-44 | -0.6017076 | 0.067 | 0.16  | 2.121315e-40 | 11 |
| TGIF1        | ASC IgG    |       |       |              |    |
| 1.210059e-44 | -0.7604031 | 0.268 | 0.298 | 2.157415e-40 | 11 |
| GGA2         | ASC IgG    |       |       |              |    |
| 1.829405e-44 | -0.8515018 | 0.421 | 0.422 | 3.261646e-40 | 11 |
| APEX1        | ASC IgG    |       |       |              |    |
| 2.090582e-44 | -0.8510643 | 0.424 | 0.428 | 3.727298e-40 | 11 |
| PPP1R15A     | ASC IgG    |       |       |              |    |

|              |            |       |       |              |    |
|--------------|------------|-------|-------|--------------|----|
| 2.973901e-44 | -0.6748713 | 0.96  | 0.904 | 5.302169e-40 | 11 |
| ATP5F1E      | ASC IgG    |       |       |              |    |
| 2.989437e-44 | -0.918788  | 0.769 | 0.681 | 5.329868e-40 | 11 |
| SLC25A3      | ASC IgG    |       |       |              |    |
| 3.186041e-44 | -0.8580689 | 0.67  | 0.594 | 5.680392e-40 | 11 |
| XRCC6        | ASC IgG    |       |       |              |    |
| 4.438549e-44 | -0.7025494 | 0.252 | 0.298 | 7.913489e-40 | 11 |
| IFT57        | ASC IgG    |       |       |              |    |
| 6.818197e-44 | -0.7976098 | 0.398 | 0.407 | 1.215616e-39 | 11 |
| BANF1        | ASC IgG    |       |       |              |    |
| 1.231795e-43 | -0.7931479 | 0.446 | 0.435 | 2.196167e-39 | 11 |
| KHDRBS1      | ASC IgG    |       |       |              |    |
| 1.619243e-43 | -0.8417541 | 0.622 | 0.567 | 2.886948e-39 | 11 |
| PCBP2        | ASC IgG    |       |       |              |    |
| 1.881707e-43 | -0.5063207 | 0.032 | 0.115 | 3.354895e-39 | 11 |
| P2RY10       | ASC IgG    |       |       |              |    |
| 2.064427e-43 | -0.5387596 | 0.107 | 0.195 | 3.680667e-39 | 11 |
| GGCT         | ASC IgG    |       |       |              |    |
| 2.117798e-43 | -0.6374984 | 0.161 | 0.24  | 3.775822e-39 | 11 |
| NT5C         | ASC IgG    |       |       |              |    |
| 3.031061e-43 | -0.8787809 | 0.434 | 0.417 | 5.404078e-39 | 11 |
| METAP2       | ASC IgG    |       |       |              |    |
| 3.906055e-43 | -0.495886  | 0.046 | 0.127 | 6.964106e-39 | 11 |
| AC025164.1   | ASC IgG    |       |       |              |    |
| 4.007034e-43 | -0.8107495 | 0.302 | 0.337 | 7.144141e-39 | 11 |
| APOBEC3C     | ASC IgG    |       |       |              |    |
| 4.307778e-43 | -0.5219124 | 0.035 | 0.111 | 7.680338e-39 | 11 |
| LINC02397    | ASC IgG    |       |       |              |    |
| 4.789112e-43 | -0.80116   | 0.786 | 0.695 | 8.538508e-39 | 11 |
| RHOA         | ASC IgG    |       |       |              |    |
| 6.978065e-43 | -0.8199828 | 0.396 | 0.389 | 1.244119e-38 | 11 |
| ARL6IP5      | ASC IgG    |       |       |              |    |
| 8.15598e-43  | -0.6172653 | 0.154 | 0.233 | 1.45413e-38  | 11 |
| TAF15        | ASC IgG    |       |       |              |    |
| 1.086902e-42 | -0.9105319 | 0.647 | 0.582 | 1.937838e-38 | 11 |
| ANP32B       | ASC IgG    |       |       |              |    |
| 1.470689e-42 | -0.7658985 | 0.302 | 0.344 | 2.622092e-38 | 11 |
| CMTM6        | ASC IgG    |       |       |              |    |
| 2.029582e-42 | -0.9404875 | 0.331 | 0.361 | 3.618541e-38 | 11 |
| ARID5B       | ASC IgG    |       |       |              |    |
| 3.419847e-42 | 0.6945342  | 0.135 | 0.018 | 6.097245e-38 | 11 |
| IGLV3-21     | ASC IgG    |       |       |              |    |
| 7.511152e-42 | -0.6654436 | 0.115 | 0.196 | 1.339163e-37 | 11 |
| HSPB1        | ASC IgG    |       |       |              |    |
| 1.572528e-41 | -0.8043435 | 0.697 | 0.63  | 2.80366e-37  | 11 |
| EIF3H        | ASC IgG    |       |       |              |    |
| 2.427143e-41 | 0.3010818  | 0.667 | 0.317 | 4.327353e-37 | 11 |
| SLC3A2       | ASC IgG    |       |       |              |    |
| 2.73951e-41  | -0.8072078 | 0.583 | 0.524 | 4.884272e-37 | 11 |
| VAMP8        | ASC IgG    |       |       |              |    |

|              |                |       |              |              |    |
|--------------|----------------|-------|--------------|--------------|----|
| 2.896341e-41 | -0.7158003     | 0.252 | 0.285        | 5.163887e-37 | 11 |
| CD82         | ASC IgG        |       |              |              |    |
| 3.606072e-41 | -0.445722      | 0.023 | 0.106        | 6.429267e-37 | 11 |
| RMI2         | ASC IgG        |       |              |              |    |
| 3.957134e-41 | -0.5667798     | 0.105 | 0.182        | 7.055175e-37 | 11 |
| LYL1         | ASC IgG        |       |              |              |    |
| 4.80012e-41  | -0.6746719     | 0.209 | 0.271        | 8.558135e-37 | 11 |
| MITD1        | ASC IgG        |       |              |              |    |
| 6.054243e-41 | -0.7306531     | 0.291 | 0.313        | 1.079411e-36 | 11 |
| PSIP1        | ASC IgG        |       |              |              |    |
| 2.102594e-40 | -0.7889983     | 0.459 | 0.421        | 3.748715e-36 | 11 |
| TMEM123      | ASC IgG        |       |              |              |    |
| 2.905581e-40 | -0.7806399     | 0.565 | 0.513        | 5.180361e-36 | 11 |
| UBE2I        | ASC IgG        |       |              |              |    |
| 3.001668e-40 | -0.7761825     | 0.749 | 0.675        | 5.351674e-36 | 11 |
| HNRNPA3      | ASC IgG        |       |              |              |    |
| 3.213172e-40 | -0.4563606     | 0.044 | 0.116        | 5.728765e-36 | 11 |
| LGALS9       | ASC IgG        |       |              |              |    |
| 3.35827e-40  | -0.7577597     | 0.459 | 0.452        | 5.987459e-36 | 11 |
| PCNP         | ASC IgG        |       |              |              |    |
| 5.175796e-40 | -0.5121265     | 0.041 | 0.123        | 9.227927e-36 | 11 |
| LPP          | ASC IgG        |       |              |              |    |
| 5.709492e-40 | -0.6752188     | 0.124 | 0.201        | 1.017945e-35 | 11 |
| PPP3CA       | ASC IgG        |       |              |              |    |
| 9.078654e-40 | -0.8964638     | 0.337 | 0.353        | 1.618633e-35 | 11 |
| TUBB4B       | ASC IgG        |       |              |              |    |
| 1.089862e-39 | -0.4880366     | 0.025 | 0.103        | 1.943115e-35 | 11 |
| RHOC         | ASC IgG        |       |              |              |    |
| 2.377064e-39 | -0.7892803     | 0.434 | 0.429        | 4.238068e-35 | 11 |
| NSA2         | ASC IgG        |       |              |              |    |
| 2.419047e-39 | -0.6260006     | 0.154 | 0.221        | 4.312918e-35 | 11 |
| CCDC50       | ASC IgG        |       |              |              |    |
| 2.630626e-39 | -0.3718337     | 0.029 | 0.113        | 4.690144e-35 | 11 |
| CENPH        | ASC IgG        |       |              |              |    |
| 4.374762e-39 | -0.9130836     | 0.789 | 0.653        | 7.799763e-35 | 11 |
| SLC25A5      | ASC IgG        |       |              |              |    |
| 7.836409e-39 | -0.76616 0.731 | 0.632 | 1.397153e-34 | 11           |    |
| BRK1         | ASC IgG        |       |              |              |    |
| 8.295833e-39 | -0.7045797     | 0.133 | 0.2          | 1.479064e-34 | 11 |
| YBX3         | ASC IgG        |       |              |              |    |
| 8.667827e-39 | -0.7993844     | 0.675 | 0.6          | 1.545387e-34 | 11 |
| TRIR         | ASC IgG        |       |              |              |    |
| 1.120129e-38 | -0.689964      | 0.273 | 0.302        | 1.997078e-34 | 11 |
| ARID4B       | ASC IgG        |       |              |              |    |
| 1.165716e-38 | -0.7076746     | 0.282 | 0.316        | 2.078355e-34 | 11 |
| STRBP        | ASC IgG        |       |              |              |    |
| 1.476379e-38 | -0.5271553     | 0.082 | 0.15         | 2.632236e-34 | 11 |
| ALOX5        | ASC IgG        |       |              |              |    |
| 1.891471e-38 | -0.7353193     | 0.847 | 0.731        | 3.372304e-34 | 11 |
| SKP1         | ASC IgG        |       |              |              |    |

|              |            |       |       |              |    |
|--------------|------------|-------|-------|--------------|----|
| 2.314843e-38 | -0.4868605 | 0.046 | 0.122 | 4.127133e-34 | 11 |
| IL27RA       | ASC IgG    |       |       |              |    |
| 2.673543e-38 | -0.5677262 | 0.126 | 0.203 | 4.766659e-34 | 11 |
| RELB         | ASC IgG    |       |       |              |    |
| 3.558142e-38 | -0.7425498 | 0.455 | 0.44  | 6.343812e-34 | 11 |
| ACTR2        | ASC IgG    |       |       |              |    |
| 4.454978e-38 | -0.3957422 | 0.029 | 0.103 | 7.94278e-34  | 11 |
| BACH2        | ASC IgG    |       |       |              |    |
| 5.491153e-38 | -0.6289367 | 0.09  | 0.166 | 9.790177e-34 | 11 |
| MARCKS       | ASC IgG    |       |       |              |    |
| 5.797815e-38 | -0.6623288 | 0.131 | 0.197 | 1.033692e-33 | 11 |
| CLEC2B       | ASC IgG    |       |       |              |    |
| 6.772509e-38 | -0.7627619 | 0.375 | 0.377 | 1.207471e-33 | 11 |
| ZFAND6       | ASC IgG    |       |       |              |    |
| 1.146582e-37 | -0.582382  | 0.147 | 0.221 | 2.044241e-33 | 11 |
| PCM1         | ASC IgG    |       |       |              |    |
| 1.519263e-37 | -0.6110557 | 0.215 | 0.259 | 2.708694e-33 | 11 |
| ABI1         | ASC IgG    |       |       |              |    |
| 3.302844e-37 | -0.5315024 | 0.128 | 0.191 | 5.888641e-33 | 11 |
| NUP88        | ASC IgG    |       |       |              |    |
| 3.419354e-37 | -0.7889209 | 0.534 | 0.477 | 6.096366e-33 | 11 |
| CD47         | ASC IgG    |       |       |              |    |
| 4.143518e-37 | -0.8004049 | 0.538 | 0.488 | 7.387478e-33 | 11 |
| CCT3         | ASC IgG    |       |       |              |    |
| 4.19703e-37  | 0.3954806  | 0.215 | 0.044 | 7.482885e-33 | 11 |
| PLD4         | ASC IgG    |       |       |              |    |
| 5.088041e-37 | -0.680891  | 0.315 | 0.334 | 9.071469e-33 | 11 |
| BAX          | ASC IgG    |       |       |              |    |
| 4.012189e-36 | -0.6763317 | 0.227 | 0.263 | 7.153332e-32 | 11 |
| DAPP1        | ASC IgG    |       |       |              |    |
| 4.244421e-36 | -0.5520418 | 0.139 | 0.2   | 7.567378e-32 | 11 |
| MCM3         | ASC IgG    |       |       |              |    |
| 5.282704e-36 | -0.6050292 | 0.162 | 0.222 | 9.418533e-32 | 11 |
| TRAF4        | ASC IgG    |       |       |              |    |
| 7.958923e-36 | -0.7725322 | 0.419 | 0.388 | 1.418996e-31 | 11 |
| CCT5         | ASC IgG    |       |       |              |    |
| 8.056778e-36 | -0.6569713 | 0.221 | 0.279 | 1.436443e-31 | 11 |
| MSN          | ASC IgG    |       |       |              |    |
| 8.614062e-36 | -0.428079  | 0.036 | 0.103 | 1.535801e-31 | 11 |
| CDKN2D       | ASC IgG    |       |       |              |    |
| 1.685611e-35 | -0.8053615 | 0.884 | 0.798 | 3.005276e-31 | 11 |
| LAPTM5       | ASC IgG    |       |       |              |    |
| 1.846195e-35 | -0.6798001 | 0.431 | 0.411 | 3.29158e-31  | 11 |
| MOB1A        | ASC IgG    |       |       |              |    |
| 2.160371e-35 | -0.7011577 | 0.366 | 0.368 | 3.851725e-31 | 11 |
| CACYBP       | ASC IgG    |       |       |              |    |
| 2.51425e-35  | -0.5325056 | 0.143 | 0.225 | 4.482656e-31 | 11 |
| RPIA         | ASC IgG    |       |       |              |    |
| 2.807357e-35 | -0.6372936 | 0.295 | 0.3   | 5.005237e-31 | 11 |
| ITSN2        | ASC IgG    |       |       |              |    |



|              |            |       |              |              |    |
|--------------|------------|-------|--------------|--------------|----|
| 2.94161e-35  | -0.5721011 | 0.12  | 0.188        | 5.244597e-31 | 11 |
| KIF20B       | ASC IgG    |       |              |              |    |
| 3.264234e-35 | -0.4360499 | 0.063 | 0.13         | 5.819802e-31 | 11 |
| NFATC1       | ASC IgG    |       |              |              |    |
| 3.998434e-35 | -0.7564053 | 0.833 | 0.72         | 7.128808e-31 | 11 |
| SRSF5        | ASC IgG    |       |              |              |    |
| 4.887843e-35 | -0.4973353 | 0.089 | 0.156        | 8.714535e-31 | 11 |
| TCOF1        | ASC IgG    |       |              |              |    |
| 8.177623e-35 | -0.6772348 | 0.392 | 0.379        | 1.457988e-30 | 11 |
| POLR2G       | ASC IgG    |       |              |              |    |
| 1.048445e-34 | -0.6340264 | 0.256 | 0.284        | 1.869273e-30 | 11 |
| MTPN         | ASC IgG    |       |              |              |    |
| 1.309951e-34 | -0.6777597 | 0.267 | 0.292        | 2.335512e-30 | 11 |
| YWHAH        | ASC IgG    |       |              |              |    |
| 1.643654e-34 | -0.7206819 | 0.446 | 0.42         | 2.930471e-30 | 11 |
| MAGOH        | ASC IgG    |       |              |              |    |
| 1.692467e-34 | -0.7698113 | 0.672 | 0.563        | 3.0175e-30   | 11 |
| RAC1         | ASC IgG    |       |              |              |    |
| 1.811251e-34 | -0.6173122 | 0.169 | 0.228        | 3.229279e-30 | 11 |
| MCM5         | ASC IgG    |       |              |              |    |
| 1.885006e-34 | -0.7708001 | 0.471 | 0.442        | 3.360778e-30 | 11 |
| CCT6A        | ASC IgG    |       |              |              |    |
| 1.893225e-34 | -0.7659058 | 0.455 | 0.424        | 3.375431e-30 | 11 |
| BLOC1S1      | ASC IgG    |       |              |              |    |
| 2.710552e-34 | -0.4997079 | 0.09  | 0.167        | 4.832642e-30 | 11 |
| NFKB1        | ASC IgG    |       |              |              |    |
| 2.908141e-34 | -0.7288535 | 0.54  | 0.476        | 5.184924e-30 | 11 |
| UBE2N        | ASC IgG    |       |              |              |    |
| 4.011404e-34 | -0.462047  | 0.04  | 0.107        | 7.151933e-30 | 11 |
| MTSS1        | ASC IgG    |       |              |              |    |
| 5.702044e-34 | -0.5940548 | 0.205 | 0.24         | 1.016617e-29 | 11 |
| SP140        | ASC IgG    |       |              |              |    |
| 6.488886e-34 | -0.42527   | 0.153 | 1.156904e-29 | 11           |    |
| CLECL1       | ASC IgG    |       |              |              |    |
| 7.806689e-34 | -0.9111449 | 0.593 | 0.51         | 1.391855e-29 | 11 |
| PA2G4        | ASC IgG    |       |              |              |    |
| 1.40762e-33  | -0.7237634 | 0.439 | 0.39         | 2.509645e-29 | 11 |
| SH3BGR1      | ASC IgG    |       |              |              |    |
| 1.697777e-33 | -0.8422933 | 0.482 | 0.472        | 3.026967e-29 | 11 |
| SNHG8        | ASC IgG    |       |              |              |    |
| 1.764165e-33 | -0.7437902 | 0.584 | 0.512        | 3.14533e-29  | 11 |
| DNAJC8       | ASC IgG    |       |              |              |    |
| 2.879114e-33 | -0.7332341 | 0.492 | 0.434        | 5.133173e-29 | 11 |
| DAZAP2       | ASC IgG    |       |              |              |    |
| 3.422505e-33 | -0.4117743 | 0.057 | 0.125        | 6.101984e-29 | 11 |
| MAPK1        | ASC IgG    |       |              |              |    |
| 4.488902e-33 | -0.4422875 | 0.071 | 0.154        | 8.003263e-29 | 11 |
| PEA15        | ASC IgG    |       |              |              |    |
| 4.537155e-33 | -0.7527159 | 0.716 | 0.612        | 8.089294e-29 | 11 |
| PNISR        | ASC IgG    |       |              |              |    |

|              |            |       |       |              |    |
|--------------|------------|-------|-------|--------------|----|
| 5.519777e-33 | -0.6836892 | 0.346 | 0.345 | 9.841211e-29 | 11 |
| PNN          | ASC IgG    |       |       |              |    |
| 7.927374e-33 | -0.6262777 | 0.255 | 0.294 | 1.413371e-28 | 11 |
| SSRP1        | ASC IgG    |       |       |              |    |
| 9.193435e-33 | -0.6375895 | 0.19  | 0.255 | 1.639098e-28 | 11 |
| RRP7A        | ASC IgG    |       |       |              |    |
| 1.029998e-32 | -0.7143816 | 0.462 | 0.42  | 1.836383e-28 | 11 |
| SCAF11       | ASC IgG    |       |       |              |    |
| 1.073777e-32 | -0.5936626 | 0.241 | 0.27  | 1.914436e-28 | 11 |
| STMP1        | ASC IgG    |       |       |              |    |
| 1.086136e-32 | -0.6199836 | 0.261 | 0.284 | 1.936472e-28 | 11 |
| LAT2         | ASC IgG    |       |       |              |    |
| 1.117409e-32 | 0.3326936  | 0.106 | 0.011 | 1.992228e-28 | 11 |
| IGLV3-1      | ASC IgG    |       |       |              |    |
| 1.136317e-32 | -0.737021  | 0.455 | 0.427 | 2.025939e-28 | 11 |
| CCT4         | ASC IgG    |       |       |              |    |
| 1.249273e-32 | -0.6694893 | 0.351 | 0.355 | 2.227328e-28 | 11 |
| KPNB1        | ASC IgG    |       |       |              |    |
| 1.299916e-32 | -0.6652782 | 0.285 | 0.298 | 2.31762e-28  | 11 |
| RNASEH2B     | ASC IgG    |       |       |              |    |
| 1.663718e-32 | -0.5252749 | 0.143 | 0.193 | 2.966243e-28 | 11 |
| CNTRL        | ASC IgG    |       |       |              |    |
| 1.708064e-32 | -0.8155241 | 0.394 | 0.385 | 3.045308e-28 | 11 |
| NHP2         | ASC IgG    |       |       |              |    |
| 1.811651e-32 | -0.5880108 | 0.188 | 0.229 | 3.229992e-28 | 11 |
| PCSK7        | ASC IgG    |       |       |              |    |
| 2.056908e-32 | -0.8074732 | 0.762 | 0.612 | 3.667261e-28 | 11 |
| MEF2C        | ASC IgG    |       |       |              |    |
| 4.930427e-32 | -0.5212114 | 0.097 | 0.153 | 8.790457e-28 | 11 |
| CD72         | ASC IgG    |       |       |              |    |
| 4.94849e-32  | -0.4879305 | 0.086 | 0.156 | 8.822662e-28 | 11 |
| RILPL2       | ASC IgG    |       |       |              |    |
| 5.024005e-32 | -0.6175286 | 0.056 | 0.139 | 8.957299e-28 | 11 |
| FCER2        | ASC IgG    |       |       |              |    |
| 5.348118e-32 | -0.5328933 | 0.127 | 0.185 | 9.53516e-28  | 11 |
| INPP5D       | ASC IgG    |       |       |              |    |
| 7.618553e-32 | -0.5585783 | 0.125 | 0.186 | 1.358312e-27 | 11 |
| FKBP4        | ASC IgG    |       |       |              |    |
| 8.920874e-32 | -0.566178  | 0.178 | 0.213 | 1.590503e-27 | 11 |
| WASHC4       | ASC IgG    |       |       |              |    |
| 8.926961e-32 | -0.6345663 | 0.249 | 0.278 | 1.591588e-27 | 11 |
| CCNG1        | ASC IgG    |       |       |              |    |
| 1.014571e-31 | -0.6993074 | 0.347 | 0.333 | 1.808879e-27 | 11 |
| BTK          | ASC IgG    |       |       |              |    |
| 1.616874e-31 | -0.7947079 | 0.875 | 0.756 | 2.882725e-27 | 11 |
| PSMA7        | ASC IgG    |       |       |              |    |
| 2.072721e-31 | -0.62789   | 0.291 | 0.303 | 3.695454e-27 | 11 |
| HNRNPH3      | ASC IgG    |       |       |              |    |
| 2.76061e-31  | -0.4107295 | 0.032 | 0.107 | 4.921891e-27 | 11 |
| SCIMP        | ASC IgG    |       |       |              |    |

|              |            |       |       |              |    |
|--------------|------------|-------|-------|--------------|----|
| 3.509957e-31 | -0.5571162 | 0.107 | 0.172 | 6.257903e-27 | 11 |
| PARP14       | ASC IgG    |       |       |              |    |
| 3.559588e-31 | -0.4604675 | 0.089 | 0.146 | 6.34639e-27  | 11 |
| GNB5         | ASC IgG    |       |       |              |    |
| 3.62156e-31  | -0.5520891 | 0.201 | 0.236 | 6.456879e-27 | 11 |
| KRAS         | ASC IgG    |       |       |              |    |
| 3.694193e-31 | -0.3845033 | 0.037 | 0.101 | 6.586376e-27 | 11 |
| TRIM22       | ASC IgG    |       |       |              |    |
| 4.320858e-31 | -0.5366061 | 0.181 | 0.207 | 7.703658e-27 | 11 |
| CAT          | ASC IgG    |       |       |              |    |
| 5.004937e-31 | -0.552209  | 0.181 | 0.221 | 8.923302e-27 | 11 |
| NELFCD       | ASC IgG    |       |       |              |    |
| 5.716607e-31 | -0.7161082 | 0.094 | 0.174 | 1.019214e-26 | 11 |
| TNFRSF18     | ASC IgG    |       |       |              |    |
| 6.235884e-31 | -0.3758439 | 0.055 | 0.129 | 1.111796e-26 | 11 |
| RCC1         | ASC IgG    |       |       |              |    |
| 7.73088e-31  | -0.364348  | 0.058 | 0.116 | 1.378339e-26 | 11 |
| PAX5         | ASC IgG    |       |       |              |    |
| 7.744119e-31 | -0.4672708 | 0.132 | 0.183 | 1.380699e-26 | 11 |
| MED30        | ASC IgG    |       |       |              |    |
| 8.750335e-31 | -0.6632102 | 0.352 | 0.345 | 1.560097e-26 | 11 |
| DNAJB6       | ASC IgG    |       |       |              |    |
| 8.772304e-31 | -0.5317628 | 0.165 | 0.205 | 1.564014e-26 | 11 |
| ELOVL5       | ASC IgG    |       |       |              |    |
| 8.792693e-31 | -0.4559861 | 0.112 | 0.174 | 1.567649e-26 | 11 |
| SNX8         | ASC IgG    |       |       |              |    |
| 1.156328e-30 | -0.642812  | 0.225 | 0.252 | 2.061617e-26 | 11 |
| SDCBP        | ASC IgG    |       |       |              |    |
| 1.268244e-30 | -0.6012096 | 0.256 | 0.268 | 2.261152e-26 | 11 |
| MBNL1        | ASC IgG    |       |       |              |    |
| 1.365054e-30 | -1.014578  | 0.845 | 0.692 | 2.433756e-26 | 11 |
| H2AFZ        | ASC IgG    |       |       |              |    |
| 1.685957e-30 | -0.5777392 | 0.217 | 0.245 | 3.005893e-26 | 11 |
| CCDC115      | ASC IgG    |       |       |              |    |
| 1.945837e-30 | -0.6165955 | 0.276 | 0.29  | 3.469233e-26 | 11 |
| RPA2         | ASC IgG    |       |       |              |    |
| 2.371496e-30 | -0.7353193 | 0.447 | 0.416 | 4.228141e-26 | 11 |
| DDX39A       | ASC IgG    |       |       |              |    |
| 2.431416e-30 | -0.5811158 | 0.247 | 0.274 | 4.334972e-26 | 11 |
| OLA1         | ASC IgG    |       |       |              |    |
| 2.566198e-30 | -0.590877  | 0.238 | 0.254 | 4.575274e-26 | 11 |
| PRMT2        | ASC IgG    |       |       |              |    |
| 3.345533e-30 | -0.4353061 | 0.077 | 0.129 | 5.964751e-26 | 11 |
| CCNG2        | ASC IgG    |       |       |              |    |
| 3.448802e-30 | -0.5161782 | 0.101 | 0.156 | 6.148869e-26 | 11 |
| MCM7         | ASC IgG    |       |       |              |    |
| 3.596838e-30 | -0.4543072 | 0.12  | 0.181 | 6.412803e-26 | 11 |
| CBX1         | ASC IgG    |       |       |              |    |
| 3.656403e-30 | -0.5870752 | 0.271 | 0.29  | 6.519e-26    | 11 |
| MED28        | ASC IgG    |       |       |              |    |

|              |            |       |       |              |    |
|--------------|------------|-------|-------|--------------|----|
| 4.775254e-30 | 0.3427089  | 0.341 | 0.125 | 8.5138e-26   | 11 |
| PHGDH        | ASC IgG    |       |       |              |    |
| 5.506267e-30 | -0.6072908 | 0.227 | 0.252 | 9.817123e-26 | 11 |
| DNP1         | ASC IgG    |       |       |              |    |
| 5.801548e-30 | -0.5456744 | 0.113 | 0.181 | 1.034358e-25 | 11 |
| RHOF         | ASC IgG    |       |       |              |    |
| 5.961493e-30 | -0.5515321 | 0.163 | 0.21  | 1.062875e-25 | 11 |
| LARS         | ASC IgG    |       |       |              |    |
| 7.098476e-30 | -0.6954915 | 0.403 | 0.39  | 1.265587e-25 | 11 |
| EIF4B        | ASC IgG    |       |       |              |    |
| 7.456439e-30 | -0.7650676 | 0.48  | 0.427 | 1.329408e-25 | 11 |
| CCT2         | ASC IgG    |       |       |              |    |
| 9.84248e-30  | -0.4513481 | 0.093 | 0.141 | 1.754816e-25 | 11 |
| ADD3         | ASC IgG    |       |       |              |    |
| 1.001676e-29 | -0.6209301 | 0.279 | 0.3   | 1.785888e-25 | 11 |
| CAMLG        | ASC IgG    |       |       |              |    |
| 1.181545e-29 | -0.5385891 | 0.211 | 0.251 | 2.106576e-25 | 11 |
| SUPT16H      | ASC IgG    |       |       |              |    |
| 1.418959e-29 | -0.630272  | 0.348 | 0.323 | 2.529862e-25 | 11 |
| AES          | ASC IgG    |       |       |              |    |
| 1.457033e-29 | -0.4685231 | 0.089 | 0.141 | 2.597743e-25 | 11 |
| RAB29        | ASC IgG    |       |       |              |    |
| 1.661212e-29 | -0.7012862 | 0.361 | 0.32  | 2.961775e-25 | 11 |
| TNFRSF13C    | ASC IgG    |       |       |              |    |
| 1.961414e-29 | -0.3737042 | 0.044 | 0.109 | 3.497005e-25 | 11 |
| UBAC2        | ASC IgG    |       |       |              |    |
| 2.087792e-29 | -0.4041681 | 0.047 | 0.111 | 3.722324e-25 | 11 |
| LPAR5        | ASC IgG    |       |       |              |    |
| 2.151943e-29 | -0.6763438 | 0.458 | 0.404 | 3.836699e-25 | 11 |
| CAPZA2       | ASC IgG    |       |       |              |    |
| 2.220836e-29 | -0.7013633 | 0.842 | 0.698 | 3.959529e-25 | 11 |
| SON          | ASC IgG    |       |       |              |    |
| 4.981058e-29 | -0.5635757 | 0.198 | 0.223 | 8.880727e-25 | 11 |
| GCA          | ASC IgG    |       |       |              |    |
| 5.269394e-29 | -0.5516676 | 0.148 | 0.186 | 9.394803e-25 | 11 |
| ANKRD44      | ASC IgG    |       |       |              |    |
| 5.41988e-29  | -0.6156726 | 0.253 | 0.266 | 9.663104e-25 | 11 |
| WSB1         | ASC IgG    |       |       |              |    |
| 5.447625e-29 | -0.5773049 | 0.17  | 0.203 | 9.71257e-25  | 11 |
| TRIM38       | ASC IgG    |       |       |              |    |
| 5.760804e-29 | -0.5522773 | 0.196 | 0.223 | 1.027094e-24 | 11 |
| CDC40        | ASC IgG    |       |       |              |    |
| 6.833771e-29 | -0.62647   | 0.333 | 0.321 | 1.218393e-24 | 11 |
| PRKAR1A      | ASC IgG    |       |       |              |    |
| 7.655657e-29 | -0.6897542 | 0.467 | 0.418 | 1.364927e-24 | 11 |
| TOMM22       | ASC IgG    |       |       |              |    |
| 1.15269e-28  | -0.6273907 | 0.301 | 0.309 | 2.055131e-24 | 11 |
| DYNC1I2      | ASC IgG    |       |       |              |    |
| 1.244632e-28 | -0.5775867 | 0.108 | 0.168 | 2.219054e-24 | 11 |
| CBX6         | ASC IgG    |       |       |              |    |

|              |            |       |       |              |    |
|--------------|------------|-------|-------|--------------|----|
| 1.27595e-28  | -0.5912156 | 0.241 | 0.265 | 2.274891e-24 | 11 |
| VASP         | ASC IgG    |       |       |              |    |
| 1.301647e-28 | -0.4988858 | 0.15  | 0.198 | 2.320707e-24 | 11 |
| ATIC         | ASC IgG    |       |       |              |    |
| 1.582052e-28 | -0.6673701 | 0.401 | 0.375 | 2.82064e-24  | 11 |
| NONO         | ASC IgG    |       |       |              |    |
| 1.684668e-28 | -0.733934  | 0.393 | 0.375 | 3.003594e-24 | 11 |
| TAF1D        | ASC IgG    |       |       |              |    |
| 1.737717e-28 | -0.4180373 | 0.084 | 0.136 | 3.098176e-24 | 11 |
| PLEKHA2      | ASC IgG    |       |       |              |    |
| 2.177495e-28 | -0.7181379 | 0.635 | 0.528 | 3.882256e-24 | 11 |
| PAIP2        | ASC IgG    |       |       |              |    |
| 2.391888e-28 | -0.7633781 | 0.778 | 0.63  | 4.264498e-24 | 11 |
| PSMA4        | ASC IgG    |       |       |              |    |
| 3.233328e-28 | -0.6786833 | 0.466 | 0.421 | 5.7647e-24   | 11 |
| GPBP1        | ASC IgG    |       |       |              |    |
| 4.038942e-28 | -0.7497995 | 0.07  | 0.132 | 7.20103e-24  | 11 |
| MYC          | ASC IgG    |       |       |              |    |
| 4.123036e-28 | -0.595894  | 0.287 | 0.297 | 7.35096e-24  | 11 |
| TWF2         | ASC IgG    |       |       |              |    |
| 4.428279e-28 | -0.6747066 | 0.395 | 0.329 | 7.895179e-24 | 11 |
| GRHPR        | ASC IgG    |       |       |              |    |
| 4.772262e-28 | -0.6824425 | 0.39  | 0.35  | 8.508466e-24 | 11 |
| APOBEC3G     | ASC IgG    |       |       |              |    |
| 6.833667e-28 | -0.7152527 | 0.792 | 0.653 | 1.218374e-23 | 11 |
| RBX1         | ASC IgG    |       |       |              |    |
| 1.126213e-27 | -0.5126297 | 0.165 | 0.209 | 2.007925e-23 | 11 |
| PITHD1       | ASC IgG    |       |       |              |    |
| 1.574811e-27 | -0.6866871 | 0.528 | 0.457 | 2.807731e-23 | 11 |
| RAP1B        | ASC IgG    |       |       |              |    |
| 1.66175e-27  | -0.6675548 | 0.703 | 0.634 | 2.962734e-23 | 11 |
| CD53         | ASC IgG    |       |       |              |    |
| 1.688267e-27 | -0.8115251 | 0.708 | 0.591 | 3.010012e-23 | 11 |
| SRSF2        | ASC IgG    |       |       |              |    |
| 2.008009e-27 | -0.4934517 | 0.102 | 0.151 | 3.58008e-23  | 11 |
| ESYT1        | ASC IgG    |       |       |              |    |
| 2.159455e-27 | -0.5984697 | 0.309 | 0.3   | 3.850093e-23 | 11 |
| POLE4        | ASC IgG    |       |       |              |    |
| 2.161638e-27 | -0.6629719 | 0.465 | 0.416 | 3.853984e-23 | 11 |
| ELF1         | ASC IgG    |       |       |              |    |
| 2.191418e-27 | -0.5460919 | 0.15  | 0.203 | 3.907078e-23 | 11 |
| NPM3         | ASC IgG    |       |       |              |    |
| 2.380638e-27 | -0.6364887 | 0.363 | 0.341 | 4.24444e-23  | 11 |
| PDCD10       | ASC IgG    |       |       |              |    |
| 2.441286e-27 | -0.521596  | 0.17  | 0.195 | 4.35257e-23  | 11 |
| ADK          | ASC IgG    |       |       |              |    |
| 3.109905e-27 | -0.4958286 | 0.123 | 0.172 | 5.54465e-23  | 11 |
| MFSD10       | ASC IgG    |       |       |              |    |
| 3.226713e-27 | -0.7023483 | 0.464 | 0.418 | 5.752906e-23 | 11 |
| EIF6         | ASC IgG    |       |       |              |    |

|              |            |       |       |              |    |
|--------------|------------|-------|-------|--------------|----|
| 4.384592e-27 | -0.4352045 | 0.083 | 0.135 | 7.81729e-23  | 11 |
| TTF1         | ASC IgG    |       |       |              |    |
| 5.087352e-27 | -0.5087935 | 0.105 | 0.146 | 9.07024e-23  | 11 |
| SUN2         | ASC IgG    |       |       |              |    |
| 5.811787e-27 | -0.6310357 | 0.381 | 0.36  | 1.036183e-22 | 11 |
| TKT          | ASC IgG    |       |       |              |    |
| 6.07943e-27  | -0.7025342 | 0.638 | 0.558 | 1.083901e-22 | 11 |
| UXT          | ASC IgG    |       |       |              |    |
| 8.870844e-27 | -0.4763467 | 0.111 | 0.17  | 1.581583e-22 | 11 |
| TNIP2        | ASC IgG    |       |       |              |    |
| 9.417403e-27 | -0.5719037 | 0.207 | 0.236 | 1.679029e-22 | 11 |
| CNPPD1       | ASC IgG    |       |       |              |    |
| 9.976638e-27 | -0.5678591 | 0.237 | 0.269 | 1.778735e-22 | 11 |
| JUN          | ASC IgG    |       |       |              |    |
| 1.02332e-26  | -0.7409835 | 0.693 | 0.567 | 1.824477e-22 | 11 |
| RBM8A        | ASC IgG    |       |       |              |    |
| 1.985341e-26 | -0.5216219 | 0.183 | 0.213 | 3.539664e-22 | 11 |
| NR3C1        | ASC IgG    |       |       |              |    |
| 2.06011e-26  | -0.5191034 | 0.181 | 0.216 | 3.672969e-22 | 11 |
| EMG1         | ASC IgG    |       |       |              |    |
| 2.388982e-26 | -0.6133988 | 0.377 | 0.345 | 4.259315e-22 | 11 |
| H2AFY        | ASC IgG    |       |       |              |    |
| 3.523627e-26 | -0.6636697 | 0.654 | 0.539 | 6.282275e-22 | 11 |
| SUM01        | ASC IgG    |       |       |              |    |
| 3.628831e-26 | -0.7045967 | 0.759 | 0.62  | 6.469842e-22 | 11 |
| LAMTOR5      | ASC IgG    |       |       |              |    |
| 4.030361e-26 | -0.5542191 | 0.194 | 0.223 | 7.18573e-22  | 11 |
| SKAP2        | ASC IgG    |       |       |              |    |
| 4.794854e-26 | -0.3423444 | 0.053 | 0.105 | 8.548745e-22 | 11 |
| SORL1        | ASC IgG    |       |       |              |    |
| 4.93231e-26  | -0.6623837 | 0.561 | 0.47  | 8.793816e-22 | 11 |
| PSMB8        | ASC IgG    |       |       |              |    |
| 5.163157e-26 | -0.5589773 | 0.205 | 0.246 | 9.205393e-22 | 11 |
| DENR         | ASC IgG    |       |       |              |    |
| 5.90998e-26  | -0.3976029 | 0.103 | 0.158 | 1.05369e-21  | 11 |
| BCL7C        | ASC IgG    |       |       |              |    |
| 5.93024e-26  | -0.4511149 | 0.083 | 0.135 | 1.057303e-21 | 11 |
| NFKB2        | ASC IgG    |       |       |              |    |
| 7.974797e-26 | -0.5479468 | 0.234 | 0.247 | 1.421826e-21 | 11 |
| SNX6         | ASC IgG    |       |       |              |    |
| 8.620537e-26 | -0.6156959 | 0.388 | 0.349 | 1.536956e-21 | 11 |
| LSM14A       | ASC IgG    |       |       |              |    |
| 8.896066e-26 | -0.694157  | 0.324 | 0.327 | 1.58608e-21  | 11 |
| ZFP36        | ASC IgG    |       |       |              |    |
| 1.013919e-25 | -0.5295957 | 0.266 | 0.245 | 1.807715e-21 | 11 |
| IKZF1        | ASC IgG    |       |       |              |    |
| 1.227108e-25 | -0.5010545 | 0.133 | 0.175 | 2.187811e-21 | 11 |
| TRIM13       | ASC IgG    |       |       |              |    |
| 1.799567e-25 | -0.5821179 | 0.243 | 0.236 | 3.208448e-21 | 11 |
| CCND3        | ASC IgG    |       |       |              |    |

|              |            |       |       |              |              |
|--------------|------------|-------|-------|--------------|--------------|
| 2.021816e-25 | 3.805822   | 0.228 | 0.145 | 3.604695e-21 | 11           |
| IGHA1        | ASC IgG    |       |       |              |              |
| 2.490502e-25 | -0.7042458 |       | 0.824 | 0.683        | 4.440316e-21 |
| PPP1CA       | ASC IgG    |       |       |              | 11           |
| 2.497155e-25 | -0.4560242 |       | 0.108 | 0.154        | 4.452178e-21 |
| MAD1L1       | ASC IgG    |       |       |              | 11           |
| 2.497384e-25 | -0.6522707 |       | 0.466 | 0.402        | 4.452586e-21 |
| BZW1         | ASC IgG    |       |       |              | 11           |
| 2.747664e-25 | -0.4544544 |       | 0.104 | 0.146        | 4.898809e-21 |
| MID1IP1      | ASC IgG    |       |       |              | 11           |
| 2.950731e-25 | -0.5212631 |       | 0.211 | 0.222        | 5.260859e-21 |
| THUMPD3-AS1  | ASC IgG    |       |       |              | 11           |
| 3.155688e-25 | -0.6619444 |       | 0.556 | 0.463        | 5.626276e-21 |
| PRDX6        | ASC IgG    |       |       |              | 11           |
| 3.171402e-25 | -0.5283514 |       | 0.181 | 0.205        | 5.654293e-21 |
| AP1S2        | ASC IgG    |       |       |              | 11           |
| 3.715791e-25 | -0.696465  |       | 0.829 | 0.693        | 6.624884e-21 |
| CIRBP        | ASC IgG    |       |       |              | 11           |
| 3.990219e-25 | -0.4814815 |       | 0.131 | 0.184        | 7.114162e-21 |
| TUBA1C       | ASC IgG    |       |       |              | 11           |
| 4.55467e-25  | -0.3512888 |       | 0.048 | 0.104        | 8.120521e-21 |
| IRF5         | ASC IgG    |       |       |              | 11           |
| 4.917841e-25 | -0.6056824 |       | 0.36  | 0.334        | 8.768018e-21 |
| TBCB         | ASC IgG    |       |       |              | 11           |
| 7.127991e-25 | -0.6010089 |       | 0.352 | 0.332        | 1.27085e-20  |
| LSM2         | ASC IgG    |       |       |              | 11           |
| 7.762124e-25 | -0.6931278 |       | 0.596 | 0.5          | 1.383909e-20 |
| XRCC5        | ASC IgG    |       |       |              | 11           |
| 8.723398e-25 | -0.509324  |       | 0.178 | 0.206        | 1.555295e-20 |
| RECQL        | ASC IgG    |       |       |              | 11           |
| 9.357914e-25 | -0.617546  |       | 0.573 | 0.483        | 1.668423e-20 |
| GMFG         | ASC IgG    |       |       |              | 11           |
| 9.47972e-25  | -0.3961658 |       | 0.072 | 0.121        | 1.690139e-20 |
| NAB2         | ASC IgG    |       |       |              | 11           |
| 1.05257e-24  | -0.6711017 |       | 0.378 | 0.375        | 1.876627e-20 |
| FAM107B      | ASC IgG    |       |       |              | 11           |
| 1.333755e-24 | -0.5425619 |       | 0.253 | 0.262        | 2.377952e-20 |
| HDAC2        | ASC IgG    |       |       |              | 11           |
| 1.406009e-24 | -0.6739253 |       | 0.493 | 0.395        | 2.506773e-20 |
| BASP1        | ASC IgG    |       |       |              | 11           |
| 1.494596e-24 | -0.7162016 |       | 0.9   | 0.79         | 2.664716e-20 |
| HLA-E        | ASC IgG    |       |       |              | 11           |
| 1.626801e-24 | -0.6214352 |       | 0.371 | 0.351        | 2.900424e-20 |
| MRPS6        | ASC IgG    |       |       |              | 11           |
| 1.645852e-24 | -0.5837046 |       | 0.235 | 0.246        | 2.934389e-20 |
| CKS1B        | ASC IgG    |       |       |              | 11           |
| 1.726787e-24 | -0.6714445 |       | 0.937 | 0.803        | 3.078689e-20 |
| TMA7         | ASC IgG    |       |       |              | 11           |
| 1.822988e-24 | -0.6550646 |       | 0.44  | 0.381        | 3.250206e-20 |
| SRSF10       | ASC IgG    |       |       |              | 11           |

|              |            |       |       |              |    |
|--------------|------------|-------|-------|--------------|----|
| 1.925369e-24 | -0.5482229 | 0.249 | 0.264 | 3.43274e-20  | 11 |
| MRPL11       | ASC IgG    |       |       |              |    |
| 2.420645e-24 | -0.3431259 | 0.049 | 0.108 | 4.315768e-20 | 11 |
| TP53         | ASC IgG    |       |       |              |    |
| 2.652781e-24 | -0.7398658 | 0.553 | 0.477 | 4.729644e-20 | 11 |
| RSL1D1       | ASC IgG    |       |       |              |    |
| 3.261481e-24 | -0.5790365 | 0.211 | 0.233 | 5.814894e-20 | 11 |
| EPB41L4A-AS1 | ASC IgG    |       |       |              |    |
| 3.656502e-24 | -0.4631398 | 0.169 | 0.202 | 6.519178e-20 | 11 |
| SNRNP40      | ASC IgG    |       |       |              |    |
| 3.656573e-24 | -0.6547597 | 0.267 | 0.282 | 6.519304e-20 | 11 |
| MT-ND4L      | ASC IgG    |       |       |              |    |
| 5.399395e-24 | -0.6430321 | 0.377 | 0.357 | 9.62658e-20  | 11 |
| POLR1D       | ASC IgG    |       |       |              |    |
| 5.498883e-24 | -0.6581912 | 0.762 | 0.65  | 9.803959e-20 | 11 |
| HLA-DQA1     | ASC IgG    |       |       |              |    |
| 5.815678e-24 | -0.4652049 | 0.159 | 0.173 | 1.036877e-19 | 11 |
| TMEM156      | ASC IgG    |       |       |              |    |
| 8.09022e-24  | -0.735526  | 0.587 | 0.471 | 1.442405e-19 | 11 |
| SNRPD1       | ASC IgG    |       |       |              |    |
| 9.081856e-24 | -0.5089815 | 0.184 | 0.208 | 1.619204e-19 | 11 |
| ARHGAP30     | ASC IgG    |       |       |              |    |
| 9.287286e-24 | -0.7328515 | 0.614 | 0.506 | 1.65583e-19  | 11 |
| TALD01       | ASC IgG    |       |       |              |    |
| 9.438296e-24 | -0.3881487 | 0.078 | 0.127 | 1.682754e-19 | 11 |
| MAP4         | ASC IgG    |       |       |              |    |
| 1.211966e-23 | -0.5973088 | 0.295 | 0.293 | 2.160815e-19 | 11 |
| TNIP1        | ASC IgG    |       |       |              |    |
| 1.437336e-23 | -0.5928035 | 0.289 | 0.282 | 2.562627e-19 | 11 |
| RTN4         | ASC IgG    |       |       |              |    |
| 1.452171e-23 | -0.4738268 | 0.152 | 0.183 | 2.589077e-19 | 11 |
| TLR10        | ASC IgG    |       |       |              |    |
| 1.551309e-23 | -0.4312442 | 0.071 | 0.116 | 2.765829e-19 | 11 |
| CLN8         | ASC IgG    |       |       |              |    |
| 1.623878e-23 | -0.4616866 | 0.152 | 0.188 | 2.895213e-19 | 11 |
| CHRAC1       | ASC IgG    |       |       |              |    |
| 2.023756e-23 | -0.6328286 | 0.287 | 0.274 | 3.608154e-19 | 11 |
| TNRC6B       | ASC IgG    |       |       |              |    |
| 2.245756e-23 | -0.5758002 | 0.291 | 0.291 | 4.003959e-19 | 11 |
| VPS35        | ASC IgG    |       |       |              |    |
| 2.476123e-23 | -0.3891123 | 0.108 | 0.155 | 4.41468e-19  | 11 |
| PPIH         | ASC IgG    |       |       |              |    |
| 2.502548e-23 | -0.3328308 | 0.075 | 0.124 | 4.461792e-19 | 11 |
| GMPS         | ASC IgG    |       |       |              |    |
| 3.550775e-23 | -0.5246971 | 0.232 | 0.235 | 6.330678e-19 | 11 |
| FNTA         | ASC IgG    |       |       |              |    |
| 6.377229e-23 | -0.5940425 | 0.403 | 0.352 | 1.136996e-18 | 11 |
| EIF1B        | ASC IgG    |       |       |              |    |
| 7.222413e-23 | -0.6008912 | 0.359 | 0.324 | 1.287684e-18 | 11 |
| AKR1B1       | ASC IgG    |       |       |              |    |



|              |            |       |       |              |    |
|--------------|------------|-------|-------|--------------|----|
| 7.233888e-23 | -0.567468  | 0.348 | 0.309 | 1.28973e-18  | 11 |
| CHURC1       | ASC IgG    |       |       |              |    |
| 7.576826e-23 | -0.4904377 | 0.204 | 0.219 | 1.350872e-18 | 11 |
| CHD4         | ASC IgG    |       |       |              |    |
| 7.621943e-23 | -0.4936476 | 0.248 | 0.253 | 1.358916e-18 | 11 |
| RGS10        | ASC IgG    |       |       |              |    |
| 9.127955e-23 | -0.4187382 | 0.082 | 0.122 | 1.627423e-18 | 11 |
| ZNF318       | ASC IgG    |       |       |              |    |
| 1.338384e-22 | -0.6762762 | 0.646 | 0.53  | 2.386205e-18 | 11 |
| SOD1         | ASC IgG    |       |       |              |    |
| 1.367226e-22 | -0.5670849 | 0.336 | 0.315 | 2.437627e-18 | 11 |
| WDR1         | ASC IgG    |       |       |              |    |
| 1.72713e-22  | -0.5528669 | 0.317 | 0.29  | 3.079301e-18 | 11 |
| G3BP1        | ASC IgG    |       |       |              |    |
| 1.991446e-22 | -0.3851683 | 0.103 | 0.143 | 3.550549e-18 | 11 |
| NUP107       | ASC IgG    |       |       |              |    |
| 2.725848e-22 | -0.6846641 | 0.622 | 0.503 | 4.859914e-18 | 11 |
| SRRM1        | ASC IgG    |       |       |              |    |
| 2.85881e-22  | -0.5941536 | 0.401 | 0.362 | 5.096973e-18 | 11 |
| CPNE1        | ASC IgG    |       |       |              |    |
| 3.261173e-22 | -0.4689329 | 0.136 | 0.16  | 5.814345e-18 | 11 |
| AIDA         | ASC IgG    |       |       |              |    |
| 3.950849e-22 | -0.7224594 | 0.551 | 0.454 | 7.043968e-18 | 11 |
| LSM5         | ASC IgG    |       |       |              |    |
| 4.194801e-22 | -0.4554585 | 0.194 | 0.213 | 7.47891e-18  | 11 |
| NSL1         | ASC IgG    |       |       |              |    |
| 5.050471e-22 | -0.6795379 | 0.565 | 0.454 | 9.004485e-18 | 11 |
| SFPQ         | ASC IgG    |       |       |              |    |
| 6.596617e-22 | -0.5218886 | 0.234 | 0.242 | 1.176111e-17 | 11 |
| CDC42SE2     | ASC IgG    |       |       |              |    |
| 9.59273e-22  | -0.6502199 | 0.511 | 0.425 | 1.710288e-17 | 11 |
| RNPS1        | ASC IgG    |       |       |              |    |
| 9.85023e-22  | -0.4836149 | 0.21  | 0.224 | 1.756198e-17 | 11 |
| JMJD1C       | ASC IgG    |       |       |              |    |
| 1.015342e-21 | -0.6220045 | 0.561 | 0.453 | 1.810253e-17 | 11 |
| PPP4C        | ASC IgG    |       |       |              |    |
| 1.166383e-21 | -0.46813   | 0.115 | 0.152 | 2.079545e-17 | 11 |
| CTNNB1       | ASC IgG    |       |       |              |    |
| 1.385299e-21 | -0.5430923 | 0.127 | 0.158 | 2.46985e-17  | 11 |
| SLC2A3       | ASC IgG    |       |       |              |    |
| 1.543465e-21 | -0.4635083 | 0.239 | 0.234 | 2.751844e-17 | 11 |
| ZCCHC7       | ASC IgG    |       |       |              |    |
| 1.621906e-21 | -0.6378259 | 0.636 | 0.512 | 2.891696e-17 | 11 |
| SRP9         | ASC IgG    |       |       |              |    |
| 1.688231e-21 | -0.3306248 | 0.064 | 0.101 | 3.009946e-17 | 11 |
| CENPM        | ASC IgG    |       |       |              |    |
| 1.763084e-21 | -0.4227821 | 0.135 | 0.162 | 3.143402e-17 | 11 |
| DNAJC9       | ASC IgG    |       |       |              |    |
| 1.929938e-21 | -0.4991916 | 0.219 | 0.229 | 3.440886e-17 | 11 |
| NOB1         | ASC IgG    |       |       |              |    |

|              |            |       |       |              |    |
|--------------|------------|-------|-------|--------------|----|
| 2.082091e-21 | -0.8274342 | 0.49  | 0.425 | 3.712161e-17 | 11 |
| PLP2         | ASC IgG    |       |       |              |    |
| 2.215067e-21 | -0.4810333 | 0.211 | 0.212 | 3.949243e-17 | 11 |
| APPL1        | ASC IgG    |       |       |              |    |
| 2.347916e-21 | -0.5510158 | 0.305 | 0.295 | 4.186099e-17 | 11 |
| CLNS1A       | ASC IgG    |       |       |              |    |
| 2.731027e-21 | -0.4605663 | 0.167 | 0.191 | 4.869148e-17 | 11 |
| PHF14        | ASC IgG    |       |       |              |    |
| 3.202932e-21 | -0.4186169 | 0.127 | 0.152 | 5.710508e-17 | 11 |
| SCAF4        | ASC IgG    |       |       |              |    |
| 3.221382e-21 | -0.4012505 | 0.114 | 0.148 | 5.743402e-17 | 11 |
| ARL6IP6      | ASC IgG    |       |       |              |    |
| 3.764298e-21 | -0.5247772 | 0.294 | 0.282 | 6.711367e-17 | 11 |
| GNAI3        | ASC IgG    |       |       |              |    |
| 4.526669e-21 | -0.3199535 | 0.076 | 0.126 | 8.070597e-17 | 11 |
| NUP93        | ASC IgG    |       |       |              |    |
| 4.610323e-21 | -0.4351023 | 0.107 | 0.138 | 8.219745e-17 | 11 |
| SMIM29       | ASC IgG    |       |       |              |    |
| 4.739077e-21 | -0.4875246 | 0.2   | 0.203 | 8.4493e-17   | 11 |
| IFNGR2       | ASC IgG    |       |       |              |    |
| 4.794322e-21 | -0.4300444 | 0.173 | 0.191 | 8.547796e-17 | 11 |
| USP1         | ASC IgG    |       |       |              |    |
| 5.321527e-21 | -0.4776895 | 0.259 | 0.259 | 9.487751e-17 | 11 |
| ILK          | ASC IgG    |       |       |              |    |
| 5.525e-21    | -0.4704923 | 0.207 | 0.228 | 9.850522e-17 | 11 |
| FUBP1        | ASC IgG    |       |       |              |    |
| 9.007526e-21 | -0.5403365 | 0.28  | 0.275 | 1.605952e-16 | 11 |
| SMC3         | ASC IgG    |       |       |              |    |
| 9.439935e-21 | -0.6363018 | 0.394 | 0.346 | 1.683046e-16 | 11 |
| LITAF        | ASC IgG    |       |       |              |    |
| 9.55003e-21  | -0.5021641 | 0.227 | 0.235 | 1.702675e-16 | 11 |
| DNAJC19      | ASC IgG    |       |       |              |    |
| 9.651299e-21 | -0.3597461 | 0.088 | 0.128 | 1.72073e-16  | 11 |
| TOB2         | ASC IgG    |       |       |              |    |
| 1.088048e-20 | -0.5488306 | 0.409 | 0.352 | 1.939881e-16 | 11 |
| DBNL         | ASC IgG    |       |       |              |    |
| 2.146999e-20 | -0.4958111 | 0.233 | 0.244 | 3.827885e-16 | 11 |
| GTF2H5       | ASC IgG    |       |       |              |    |
| 2.345955e-20 | -0.3876276 | 0.099 | 0.135 | 4.182603e-16 | 11 |
| PLEKH01      | ASC IgG    |       |       |              |    |
| 2.630513e-20 | -0.3813469 | 0.094 | 0.134 | 4.689942e-16 | 11 |
| MCMBP        | ASC IgG    |       |       |              |    |
| 2.641887e-20 | -0.4725354 | 0.132 | 0.164 | 4.71022e-16  | 11 |
| CD58         | ASC IgG    |       |       |              |    |
| 2.860835e-20 | -0.4201421 | 0.16  | 0.185 | 5.100583e-16 | 11 |
| DHX9         | ASC IgG    |       |       |              |    |
| 3.106074e-20 | -0.5442532 | 0.302 | 0.288 | 5.537819e-16 | 11 |
| ZMAT2        | ASC IgG    |       |       |              |    |
| 3.621755e-20 | -0.4921771 | 0.226 | 0.228 | 6.457227e-16 | 11 |
| SINHCAF      | ASC IgG    |       |       |              |    |

|              |            |       |       |              |    |
|--------------|------------|-------|-------|--------------|----|
| 3.686711e-20 | -0.4998439 | 0.276 | 0.256 | 6.573038e-16 | 11 |
| RAD21        | ASC IgG    |       |       |              |    |
| 4.069801e-20 | -0.7094639 | 0.751 | 0.607 | 7.256048e-16 | 11 |
| PTGES3       | ASC IgG    |       |       |              |    |
| 4.386173e-20 | -0.5136248 | 0.266 | 0.249 | 7.820108e-16 | 11 |
| ROCK1        | ASC IgG    |       |       |              |    |
| 5.566526e-20 | -0.5029873 | 0.254 | 0.24  | 9.924559e-16 | 11 |
| SLC38A1      | ASC IgG    |       |       |              |    |
| 5.629713e-20 | -0.4672201 | 0.226 | 0.228 | 1.003721e-15 | 11 |
| IAH1         | ASC IgG    |       |       |              |    |
| 5.785833e-20 | -0.523015  | 0.283 | 0.275 | 1.031556e-15 | 11 |
| SRI          | ASC IgG    |       |       |              |    |
| 6.725405e-20 | -0.4413177 | 0.181 | 0.185 | 1.199072e-15 | 11 |
| OSBPL8       | ASC IgG    |       |       |              |    |
| 6.796915e-20 | -0.6682051 | 0.333 | 0.277 | 1.211822e-15 | 11 |
| ADAM28       | ASC IgG    |       |       |              |    |
| 8.392616e-20 | -0.5498459 | 0.329 | 0.283 | 1.496319e-15 | 11 |
| CARHSP1      | ASC IgG    |       |       |              |    |
| 8.607728e-20 | -0.4486257 | 0.159 | 0.183 | 1.534672e-15 | 11 |
| ARL2         | ASC IgG    |       |       |              |    |
| 9.041553e-20 | -0.5202418 | 0.263 | 0.246 | 1.612018e-15 | 11 |
| MKRN1        | ASC IgG    |       |       |              |    |
| 1.014817e-19 | -0.3552131 | 0.069 | 0.112 | 1.809318e-15 | 11 |
| ZNF267       | ASC IgG    |       |       |              |    |
| 1.022404e-19 | -0.4890142 | 0.216 | 0.214 | 1.822844e-15 | 11 |
| VPS4B        | ASC IgG    |       |       |              |    |
| 1.173161e-19 | -0.5519625 | 0.371 | 0.325 | 2.091628e-15 | 11 |
| PSMG2        | ASC IgG    |       |       |              |    |
| 1.213159e-19 | -0.6715043 | 0.745 | 0.595 | 2.162941e-15 | 11 |
| CALM1        | ASC IgG    |       |       |              |    |
| 1.348414e-19 | 0.4057135  | 0.246 | 0.044 | 2.404088e-15 | 11 |
| XIST         | ASC IgG    |       |       |              |    |
| 1.362198e-19 | -0.6506652 | 0.707 | 0.575 | 2.428663e-15 | 11 |
| C11orf58     | ASC IgG    |       |       |              |    |
| 1.447056e-19 | -0.4943431 | 0.266 | 0.255 | 2.579956e-15 | 11 |
| CYB5B        | ASC IgG    |       |       |              |    |
| 1.486036e-19 | -0.6165657 | 0.548 | 0.447 | 2.649454e-15 | 11 |
| MRPS21       | ASC IgG    |       |       |              |    |
| 1.560701e-19 | -0.4840572 | 0.184 | 0.193 | 2.782574e-15 | 11 |
| CYTH1        | ASC IgG    |       |       |              |    |
| 1.666128e-19 | -0.4242593 | 0.167 | 0.18  | 2.97054e-15  | 11 |
| TSR2         | ASC IgG    |       |       |              |    |
| 1.767702e-19 | -0.3696826 | 0.138 | 0.172 | 3.151635e-15 | 11 |
| EED          | ASC IgG    |       |       |              |    |
| 1.872962e-19 | -0.5408042 | 0.964 | 0.881 | 3.339305e-15 | 11 |
| H3F3B        | ASC IgG    |       |       |              |    |
| 1.974553e-19 | -0.3706327 | 0.131 | 0.163 | 3.52043e-15  | 11 |
| WDR77        | ASC IgG    |       |       |              |    |
| 1.996049e-19 | -0.4942404 | 0.204 | 0.216 | 3.558756e-15 | 11 |
| LYRM4        | ASC IgG    |       |       |              |    |

|              |            |       |       |              |    |
|--------------|------------|-------|-------|--------------|----|
| 2.210867e-19 | -0.3331508 | 0.086 | 0.118 | 3.941756e-15 | 11 |
| KLHL5        | ASC IgG    |       |       |              |    |
| 2.220455e-19 | -0.4416352 | 0.205 | 0.215 | 3.95885e-15  | 11 |
| RBM22        | ASC IgG    |       |       |              |    |
| 2.227831e-19 | -0.4901021 | 0.165 | 0.181 | 3.972e-15    | 11 |
| CDC42SE1     | ASC IgG    |       |       |              |    |
| 2.510822e-19 | -0.4645822 | 0.181 | 0.192 | 4.476545e-15 | 11 |
| ARID1B       | ASC IgG    |       |       |              |    |
| 2.534799e-19 | -0.3736019 | 0.159 | 0.188 | 4.519293e-15 | 11 |
| SNRPA        | ASC IgG    |       |       |              |    |
| 2.539834e-19 | -0.4746402 | 0.18  | 0.189 | 4.52827e-15  | 11 |
| CWF19L2      | ASC IgG    |       |       |              |    |
| 2.709546e-19 | -0.5673439 | 0.27  | 0.257 | 4.830849e-15 | 11 |
| MDM4         | ASC IgG    |       |       |              |    |
| 2.767288e-19 | -0.4057626 | 0.085 | 0.124 | 4.933798e-15 | 11 |
| RAB13        | ASC IgG    |       |       |              |    |
| 3.043538e-19 | -0.4226849 | 0.162 | 0.171 | 5.426323e-15 | 11 |
| CCDC82       | ASC IgG    |       |       |              |    |
| 3.273986e-19 | -0.5965162 | 0.466 | 0.381 | 5.83719e-15  | 11 |
| JAK1         | ASC IgG    |       |       |              |    |
| 3.985379e-19 | -0.4073369 | 0.987 | 0.964 | 7.105532e-15 | 11 |
| EIF1         | ASC IgG    |       |       |              |    |
| 5.665246e-19 | -0.4465364 | 0.173 | 0.189 | 1.010057e-14 | 11 |
| PHF11        | ASC IgG    |       |       |              |    |
| 5.995113e-19 | -0.3332858 | 0.094 | 0.124 | 1.068869e-14 | 11 |
| RFC2         | ASC IgG    |       |       |              |    |
| 6.428289e-19 | -0.3684559 | 0.089 | 0.125 | 1.1461e-14   | 11 |
| DYNLT3       | ASC IgG    |       |       |              |    |
| 6.712245e-19 | -0.4717745 | 0.205 | 0.206 | 1.196726e-14 | 11 |
| ERICH1       | ASC IgG    |       |       |              |    |
| 7.221568e-19 | -0.450308  | 0.181 | 0.189 | 1.287533e-14 | 11 |
| CELF1        | ASC IgG    |       |       |              |    |
| 7.231319e-19 | -0.5827571 | 0.459 | 0.385 | 1.289272e-14 | 11 |
| RSRC2        | ASC IgG    |       |       |              |    |
| 8.433063e-19 | -0.3131784 | 0.115 | 0.139 | 1.503531e-14 | 11 |
| RPA1         | ASC IgG    |       |       |              |    |
| 1.239872e-18 | -0.6189467 | 0.608 | 0.485 | 2.210567e-14 | 11 |
| EIF3M        | ASC IgG    |       |       |              |    |
| 1.413147e-18 | -0.4820288 | 0.204 | 0.213 | 2.519499e-14 | 11 |
| COX20        | ASC IgG    |       |       |              |    |
| 1.488112e-18 | -0.3726008 | 0.105 | 0.133 | 2.653155e-14 | 11 |
| GGPS1        | ASC IgG    |       |       |              |    |
| 1.75875e-18  | -0.3907338 | 0.153 | 0.163 | 3.135675e-14 | 11 |
| LYPLAL1      | ASC IgG    |       |       |              |    |
| 1.892572e-18 | -0.4949509 | 0.319 | 0.294 | 3.374267e-14 | 11 |
| IDH3B        | ASC IgG    |       |       |              |    |
| 2.44772e-18  | -0.4645228 | 0.262 | 0.243 | 4.364041e-14 | 11 |
| WAS          | ASC IgG    |       |       |              |    |
| 2.479836e-18 | -0.5718799 | 0.383 | 0.33  | 4.4213e-14   | 11 |
| TSTD1        | ASC IgG    |       |       |              |    |

|              |            |       |       |              |    |
|--------------|------------|-------|-------|--------------|----|
| 2.922137e-18 | -0.3165948 | 0.089 | 0.126 | 5.209878e-14 | 11 |
| BZW2         | ASC IgG    |       |       |              |    |
| 3.293753e-18 | -0.4597135 | 0.245 | 0.238 | 5.872432e-14 | 11 |
| CTNBL1       | ASC IgG    |       |       |              |    |
| 3.421751e-18 | -0.5162928 | 0.333 | 0.296 | 6.10064e-14  | 11 |
| WASF2        | ASC IgG    |       |       |              |    |
| 3.447382e-18 | -0.6883305 | 0.683 | 0.525 | 6.146337e-14 | 11 |
| SRSF7        | ASC IgG    |       |       |              |    |
| 3.754034e-18 | -0.4265406 | 0.167 | 0.178 | 6.693067e-14 | 11 |
| STAG2        | ASC IgG    |       |       |              |    |
| 3.910255e-18 | -0.4237054 | 0.14  | 0.164 | 6.971594e-14 | 11 |
| MRT04        | ASC IgG    |       |       |              |    |
| 4.006421e-18 | -0.4004964 | 0.13  | 0.143 | 7.143048e-14 | 11 |
| ZMYM2        | ASC IgG    |       |       |              |    |
| 4.285005e-18 | -0.5170154 | 0.195 | 0.188 | 7.639735e-14 | 11 |
| PCNA         | ASC IgG    |       |       |              |    |
| 4.806873e-18 | -0.4939809 | 0.265 | 0.253 | 8.570173e-14 | 11 |
| PRDM2        | ASC IgG    |       |       |              |    |
| 7.379327e-18 | -0.5847663 | 0.484 | 0.412 | 1.31566e-13  | 11 |
| HCLS1        | ASC IgG    |       |       |              |    |
| 7.760315e-18 | -0.5052165 | 0.278 | 0.249 | 1.383587e-13 | 11 |
| WIPF1        | ASC IgG    |       |       |              |    |
| 8.586866e-18 | -0.3534119 | 0.115 | 0.117 | 1.530952e-13 | 11 |
| CARD16       | ASC IgG    |       |       |              |    |
| 8.708687e-18 | -0.4652794 | 0.245 | 0.228 | 1.552672e-13 | 11 |
| GTF2I        | ASC IgG    |       |       |              |    |
| 9.215043e-18 | -0.5458702 | 0.432 | 0.344 | 1.64295e-13  | 11 |
| UBE2A        | ASC IgG    |       |       |              |    |
| 1.032304e-17 | -0.5272538 | 0.363 | 0.301 | 1.840495e-13 | 11 |
| UGP2         | ASC IgG    |       |       |              |    |
| 1.149239e-17 | -0.5852911 | 0.507 | 0.416 | 2.048978e-13 | 11 |
| NDUFA12      | ASC IgG    |       |       |              |    |
| 1.157538e-17 | -0.4702574 | 0.222 | 0.222 | 2.063774e-13 | 11 |
| RNMT         | ASC IgG    |       |       |              |    |
| 1.170434e-17 | -0.4400405 | 0.208 | 0.214 | 2.086768e-13 | 11 |
| MCRIP1       | ASC IgG    |       |       |              |    |
| 1.198419e-17 | -0.4316071 | 0.165 | 0.173 | 2.136661e-13 | 11 |
| PHF20        | ASC IgG    |       |       |              |    |
| 1.280771e-17 | -0.3044279 | 0.066 | 0.102 | 2.283486e-13 | 11 |
| CXCR5        | ASC IgG    |       |       |              |    |
| 1.318839e-17 | -0.5633598 | 0.456 | 0.387 | 2.351357e-13 | 11 |
| PDCD6        | ASC IgG    |       |       |              |    |
| 1.465428e-17 | -0.6009038 | 0.446 | 0.386 | 2.612711e-13 | 11 |
| SHMT2        | ASC IgG    |       |       |              |    |
| 1.815482e-17 | -0.3864383 | 0.137 | 0.157 | 3.236822e-13 | 11 |
| DDB2         | ASC IgG    |       |       |              |    |
| 1.828563e-17 | -0.4328633 | 0.225 | 0.22  | 3.260145e-13 | 11 |
| SMARCC1      | ASC IgG    |       |       |              |    |
| 1.887791e-17 | -0.5220885 | 0.313 | 0.287 | 3.365742e-13 | 11 |
| WTAP         | ASC IgG    |       |       |              |    |

|              |               |       |             |              |    |
|--------------|---------------|-------|-------------|--------------|----|
| 2.148455e-17 | -0.5510931    | 0.456 | 0.363       | 3.83048e-13  | 11 |
| RBBP7        | ASC IgG       |       |             |              |    |
| 2.194825e-17 | -0.4782197    | 0.26  | 0.242       | 3.913153e-13 | 11 |
| TMEM126B     | ASC IgG       |       |             |              |    |
| 2.22267e-17  | -0.4971862    | 0.214 | 0.211       | 3.962798e-13 | 11 |
| FMNL1        | ASC IgG       |       |             |              |    |
| 2.310943e-17 | -0.5218 0.292 | 0.253 | 4.12018e-13 | 11           |    |
| TBC1D10C     | ASC IgG       |       |             |              |    |
| 2.313406e-17 | -0.4328632    | 0.195 | 0.193       | 4.124572e-13 | 11 |
| UTP6         | ASC IgG       |       |             |              |    |
| 2.898727e-17 | -0.3765396    | 0.143 | 0.155       | 5.16814e-13  | 11 |
| SVBP         | ASC IgG       |       |             |              |    |
| 2.958622e-17 | -0.3806999    | 0.154 | 0.169       | 5.274928e-13 | 11 |
| YEATS4       | ASC IgG       |       |             |              |    |
| 3.038416e-17 | -0.6105216    | 0.515 | 0.416       | 5.417192e-13 | 11 |
| NUDC         | ASC IgG       |       |             |              |    |
| 3.237203e-17 | -0.3114237    | 0.082 | 0.105       | 5.771609e-13 | 11 |
| LNPEP        | ASC IgG       |       |             |              |    |
| 3.365362e-17 | -0.5075645    | 0.297 | 0.275       | 6.000104e-13 | 11 |
| NCBP2        | ASC IgG       |       |             |              |    |
| 3.500494e-17 | -0.4117184    | 0.15  | 0.16        | 6.241031e-13 | 11 |
| ARHGAP15     | ASC IgG       |       |             |              |    |
| 3.525211e-17 | -0.428718     | 0.132 | 0.149       | 6.285098e-13 | 11 |
| TRIM56       | ASC IgG       |       |             |              |    |
| 3.805952e-17 | -0.4443912    | 0.253 | 0.232       | 6.785632e-13 | 11 |
| MTF2         | ASC IgG       |       |             |              |    |
| 4.276663e-17 | -0.6224162    | 0.38  | 0.321       | 7.624863e-13 | 11 |
| NOP56        | ASC IgG       |       |             |              |    |
| 4.644351e-17 | -0.502512     | 0.305 | 0.253       | 8.280414e-13 | 11 |
| ZCCHC10      | ASC IgG       |       |             |              |    |
| 5.397649e-17 | -0.3156674    | 0.067 | 0.102       | 9.623469e-13 | 11 |
| CCNB1IP1     | ASC IgG       |       |             |              |    |
| 5.562326e-17 | -0.5527116    | 0.42  | 0.333       | 9.917071e-13 | 11 |
| POLR2J3.1    | ASC IgG       |       |             |              |    |
| 6.006981e-17 | -0.5083236    | 0.321 | 0.276       | 1.070985e-12 | 11 |
| TANK         | ASC IgG       |       |             |              |    |
| 6.938203e-17 | -0.6030329    | 0.511 | 0.414       | 1.237012e-12 | 11 |
| IDI1         | ASC IgG       |       |             |              |    |
| 7.554917e-17 | -0.5633826    | 0.192 | 0.191       | 1.346966e-12 | 11 |
| DAAM1        | ASC IgG       |       |             |              |    |
| 7.746436e-17 | -0.4408491    | 0.219 | 0.217       | 1.381112e-12 | 11 |
| ITGB1BP1     | ASC IgG       |       |             |              |    |
| 8.183175e-17 | -0.6182914    | 0.837 | 0.698       | 1.458978e-12 | 11 |
| EIF3K        | ASC IgG       |       |             |              |    |
| 9.036583e-17 | -0.5996321    | 0.568 | 0.425       | 1.611132e-12 | 11 |
| DNAJA1       | ASC IgG       |       |             |              |    |
| 9.422167e-17 | -0.3860344    | 0.15  | 0.157       | 1.679878e-12 | 11 |
| CREB1        | ASC IgG       |       |             |              |    |
| 9.434157e-17 | -0.310098     | 0.087 | 0.118       | 1.682016e-12 | 11 |
| LYAR         | ASC IgG       |       |             |              |    |

|              |            |       |       |              |    |
|--------------|------------|-------|-------|--------------|----|
| 9.440314e-17 | -0.4577466 | 0.239 | 0.225 | 1.683114e-12 | 11 |
| PAK2         | ASC IgG    |       |       |              |    |
| 9.801582e-17 | -0.4360797 | 0.181 | 0.184 | 1.747524e-12 | 11 |
| R3HDM4       | ASC IgG    |       |       |              |    |
| 1.037367e-16 | -0.3910446 | 0.169 | 0.177 | 1.849522e-12 | 11 |
| POLR3K       | ASC IgG    |       |       |              |    |
| 1.083481e-16 | -0.3981743 | 0.175 | 0.166 | 1.931738e-12 | 11 |
| ARHGAP25     | ASC IgG    |       |       |              |    |
| 1.336112e-16 | -0.4558967 | 0.26  | 0.247 | 2.382155e-12 | 11 |
| UBA2         | ASC IgG    |       |       |              |    |
| 1.508593e-16 | -0.5753348 | 0.649 | 0.514 | 2.68967e-12  | 11 |
| ATP5PB       | ASC IgG    |       |       |              |    |
| 1.590696e-16 | -0.4790748 | 0.272 | 0.259 | 2.836052e-12 | 11 |
| NAA50        | ASC IgG    |       |       |              |    |
| 1.709696e-16 | -0.4009326 | 0.147 | 0.151 | 3.048217e-12 | 11 |
| CHMP1B       | ASC IgG    |       |       |              |    |
| 1.748354e-16 | -0.3303764 | 0.101 | 0.128 | 3.11714e-12  | 11 |
| AMFR         | ASC IgG    |       |       |              |    |
| 1.803031e-16 | -0.3118184 | 0.086 | 0.117 | 3.214624e-12 | 11 |
| MYH9         | ASC IgG    |       |       |              |    |
| 1.892239e-16 | -0.4947238 | 0.306 | 0.275 | 3.373673e-12 | 11 |
| GL01         | ASC IgG    |       |       |              |    |
| 2.102366e-16 | -0.3815784 | 0.102 | 0.121 | 3.748308e-12 | 11 |
| LACTB        | ASC IgG    |       |       |              |    |
| 2.174764e-16 | -0.6226596 | 0.681 | 0.528 | 3.877387e-12 | 11 |
| SNRPB2       | ASC IgG    |       |       |              |    |
| 2.187089e-16 | -0.3495019 | 0.126 | 0.141 | 3.899361e-12 | 11 |
| SMC2         | ASC IgG    |       |       |              |    |
| 2.219309e-16 | -0.5583569 | 0.543 | 0.446 | 3.956806e-12 | 11 |
| HIGD2A       | ASC IgG    |       |       |              |    |
| 2.373224e-16 | -0.3520014 | 0.142 | 0.154 | 4.231221e-12 | 11 |
| PRKDC        | ASC IgG    |       |       |              |    |
| 2.561848e-16 | -0.3445689 | 0.078 | 0.106 | 4.567519e-12 | 11 |
| PDE7A        | ASC IgG    |       |       |              |    |
| 2.758115e-16 | -0.4123222 | 0.211 | 0.193 | 4.917443e-12 | 11 |
| CBX5         | ASC IgG    |       |       |              |    |
| 2.767895e-16 | -0.3718441 | 0.123 | 0.151 | 4.93488e-12  | 11 |
| HCFC1R1      | ASC IgG    |       |       |              |    |
| 2.918705e-16 | -0.4686313 | 0.297 | 0.261 | 5.203759e-12 | 11 |
| PMPCB        | ASC IgG    |       |       |              |    |
| 2.920155e-16 | -0.3615121 | 0.097 | 0.13  | 5.206344e-12 | 11 |
| EEA1         | ASC IgG    |       |       |              |    |
| 3.4383e-16   | -0.3704492 | 0.172 | 0.182 | 6.130145e-12 | 11 |
| DHX15        | ASC IgG    |       |       |              |    |
| 3.911203e-16 | -0.4446685 | 0.219 | 0.204 | 6.973284e-12 | 11 |
| SAFB         | ASC IgG    |       |       |              |    |
| 4.201221e-16 | -0.5086381 | 0.33  | 0.276 | 7.490357e-12 | 11 |
| PPP1R12A     | ASC IgG    |       |       |              |    |
| 5.26723e-16  | -0.3439617 | 0.106 | 0.123 | 9.390944e-12 | 11 |
| MAP3K8       | ASC IgG    |       |       |              |    |

|              |                |       |              |              |    |
|--------------|----------------|-------|--------------|--------------|----|
| 5.590253e-16 | -0.6109557     | 0.525 | 0.422        | 9.966862e-12 | 11 |
| STK4         | ASC IgG        |       |              |              |    |
| 5.6494e-16   | -0.4498914     | 0.217 | 0.206        | 1.007232e-11 | 11 |
| IKZF3        | ASC IgG        |       |              |              |    |
| 5.94873e-16  | -0.4187798     | 0.16  | 0.166        | 1.060599e-11 | 11 |
| HIF1A        | ASC IgG        |       |              |              |    |
| 6.859639e-16 | -0.3745243     | 0.154 | 0.163        | 1.223005e-11 | 11 |
| PTDSS1       | ASC IgG        |       |              |              |    |
| 7.459173e-16 | -0.4353731     | 0.174 | 0.184        | 1.329896e-11 | 11 |
| KANSL1       | ASC IgG        |       |              |              |    |
| 8.086949e-16 | -0.4214655     | 0.175 | 0.173        | 1.441822e-11 | 11 |
| CDK13        | ASC IgG        |       |              |              |    |
| 8.559647e-16 | -0.3205306     | 0.082 | 0.111        | 1.526099e-11 | 11 |
| SRFBP1       | ASC IgG        |       |              |              |    |
| 8.635342e-16 | -0.3957603     | 0.177 | 0.181        | 1.539595e-11 | 11 |
| COPRS        | ASC IgG        |       |              |              |    |
| 1.061916e-15 | -0.5337139     | 0.464 | 0.381        | 1.893289e-11 | 11 |
| SNRPD3       | ASC IgG        |       |              |              |    |
| 1.074015e-15 | -0.4750733     | 0.27  | 0.228        | 1.914861e-11 | 11 |
| ATM          | ASC IgG        |       |              |              |    |
| 1.096825e-15 | -0.5330462     | 0.394 | 0.332        | 1.95553e-11  | 11 |
| DARS         | ASC IgG        |       |              |              |    |
| 1.10094e-15  | -0.3160813     | 0.082 | 0.108        | 1.962865e-11 | 11 |
| LCOR         | ASC IgG        |       |              |              |    |
| 1.122352e-15 | -0.4811923     | 0.271 | 0.242        | 2.001041e-11 | 11 |
| APH1A        | ASC IgG        |       |              |              |    |
| 1.192873e-15 | -0.3992311     | 0.168 | 0.173        | 2.126774e-11 | 11 |
| OSGEP        | ASC IgG        |       |              |              |    |
| 1.206024e-15 | -0.37351 0.143 | 0.142 | 2.150221e-11 | 11           |    |
| SH3BP5       | ASC IgG        |       |              |              |    |
| 1.37883e-15  | -0.4274716     | 0.244 | 0.223        | 2.458316e-11 | 11 |
| HSPH1        | ASC IgG        |       |              |              |    |
| 1.38724e-15  | -0.5966648     | 0.619 | 0.492        | 2.47331e-11  | 11 |
| ARGLU1       | ASC IgG        |       |              |              |    |
| 1.443341e-15 | -0.444495      | 0.25  | 0.231        | 2.573332e-11 | 11 |
| RTCB         | ASC IgG        |       |              |              |    |
| 1.479549e-15 | -0.5519336     | 0.468 | 0.364        | 2.637888e-11 | 11 |
| CXXC5        | ASC IgG        |       |              |              |    |
| 1.49312e-15  | -0.3708535     | 0.15  | 0.161        | 2.662084e-11 | 11 |
| TMP0         | ASC IgG        |       |              |              |    |
| 1.704249e-15 | -0.4115146     | 0.222 | 0.213        | 3.038505e-11 | 11 |
| GLOD4        | ASC IgG        |       |              |              |    |
| 2.036057e-15 | -0.5337299     | 0.408 | 0.344        | 3.630086e-11 | 11 |
| DDX46        | ASC IgG        |       |              |              |    |
| 2.060928e-15 | -0.4925649     | 0.317 | 0.273        | 3.674428e-11 | 11 |
| SPG21        | ASC IgG        |       |              |              |    |
| 2.151016e-15 | -0.3102608     | 0.124 | 0.128        | 3.835047e-11 | 11 |
| STAP1        | ASC IgG        |       |              |              |    |
| 2.198387e-15 | -0.3552305     | 0.166 | 0.153        | 3.919505e-11 | 11 |
| CD81         | ASC IgG        |       |              |              |    |



|              |            |       |       |              |    |
|--------------|------------|-------|-------|--------------|----|
| 2.38355e-15  | -0.4907307 | 0.255 | 0.224 | 4.249632e-11 | 11 |
| PSMA3-AS1    | ASC IgG    |       |       |              |    |
| 2.401017e-15 | -0.4108859 | 0.199 | 0.194 | 4.280774e-11 | 11 |
| RABEP1       | ASC IgG    |       |       |              |    |
| 2.444257e-15 | -0.6104886 | 0.483 | 0.39  | 4.357866e-11 | 11 |
| PHB          | ASC IgG    |       |       |              |    |
| 2.499764e-15 | -0.3376056 | 0.093 | 0.117 | 4.456829e-11 | 11 |
| SIAH1        | ASC IgG    |       |       |              |    |
| 2.787045e-15 | -0.6459067 | 0.618 | 0.5   | 4.969023e-11 | 11 |
| TSC22D3      | ASC IgG    |       |       |              |    |
| 3.134897e-15 | -0.4306958 | 0.222 | 0.212 | 5.589208e-11 | 11 |
| IQGAP1       | ASC IgG    |       |       |              |    |
| 3.42915e-15  | -0.5854158 | 0.516 | 0.417 | 6.113831e-11 | 11 |
| KMT2E        | ASC IgG    |       |       |              |    |
| 3.625674e-15 | -0.4018507 | 0.22  | 0.207 | 6.464214e-11 | 11 |
| PRPF38A      | ASC IgG    |       |       |              |    |
| 3.718575e-15 | -0.3657987 | 0.122 | 0.129 | 6.629848e-11 | 11 |
| FBXL3        | ASC IgG    |       |       |              |    |
| 3.829168e-15 | -0.3605675 | 0.156 | 0.156 | 6.827024e-11 | 11 |
| DYNC1LI1     | ASC IgG    |       |       |              |    |
| 3.92741e-15  | -0.7006386 | 0.871 | 0.698 | 7.002179e-11 | 11 |
| TPI1         | ASC IgG    |       |       |              |    |
| 4.223905e-15 | -0.5278488 | 0.382 | 0.312 | 7.530801e-11 | 11 |
| LARP7        | ASC IgG    |       |       |              |    |
| 4.671146e-15 | -0.4650024 | 0.209 | 0.211 | 8.328186e-11 | 11 |
| C19orf48     | ASC IgG    |       |       |              |    |
| 4.904233e-15 | -0.4551935 | 0.268 | 0.242 | 8.743757e-11 | 11 |
| PTBP1        | ASC IgG    |       |       |              |    |
| 5.432949e-15 | -0.3190276 | 0.093 | 0.12  | 9.686405e-11 | 11 |
| UHMK1        | ASC IgG    |       |       |              |    |
| 5.597456e-15 | -0.4209698 | 0.226 | 0.209 | 9.979705e-11 | 11 |
| CHORDC1      | ASC IgG    |       |       |              |    |
| 5.83783e-15  | -0.3589094 | 0.106 | 0.119 | 1.040827e-10 | 11 |
| LIPA         | ASC IgG    |       |       |              |    |
| 6.922959e-15 | -0.3848311 | 0.151 | 0.153 | 1.234294e-10 | 11 |
| SRPK2        | ASC IgG    |       |       |              |    |
| 6.963755e-15 | -0.5495892 | 0.349 | 0.283 | 1.241568e-10 | 11 |
| ACAP1        | ASC IgG    |       |       |              |    |
| 7.249561e-15 | -0.314049  | 0.097 | 0.114 | 1.292524e-10 | 11 |
| SETX         | ASC IgG    |       |       |              |    |
| 7.328508e-15 | -0.6250417 | 0.561 | 0.447 | 1.3066e-10   | 11 |
| DRAP1        | ASC IgG    |       |       |              |    |
| 7.61196e-15  | -0.4971703 | 0.272 | 0.246 | 1.357136e-10 | 11 |
| DKC1         | ASC IgG    |       |       |              |    |
| 7.612909e-15 | -0.3205491 | 0.125 | 0.141 | 1.357306e-10 | 11 |
| MTHFS        | ASC IgG    |       |       |              |    |
| 7.696262e-15 | -0.4491246 | 0.265 | 0.234 | 1.372166e-10 | 11 |
| AKIRIN1      | ASC IgG    |       |       |              |    |
| 7.795538e-15 | -0.406611  | 0.198 | 0.183 | 1.389866e-10 | 11 |
| PPP4R3A      | ASC IgG    |       |       |              |    |

|              |            |       |             |              |    |
|--------------|------------|-------|-------------|--------------|----|
| 7.893453e-15 | -0.4006189 | 0.154 | 0.149       | 1.407324e-10 | 11 |
| ARHGAP9      | ASC IgG    |       |             |              |    |
| 8.313042e-15 | -0.3471846 | 0.139 | 0.148       | 1.482132e-10 | 11 |
| AP1G2        | ASC IgG    |       |             |              |    |
| 8.397108e-15 | -0.5650044 | 0.484 | 0.389       | 1.49712e-10  | 11 |
| SSB          | ASC IgG    |       |             |              |    |
| 9.141492e-15 | -0.3597961 | 0.12  | 0.13        | 1.629837e-10 | 11 |
| SIPA1        | ASC IgG    |       |             |              |    |
| 9.855236e-15 | -0.3747981 | 0.143 | 0.155       | 1.75709e-10  | 11 |
| SMC5         | ASC IgG    |       |             |              |    |
| 1.000363e-14 | -0.4010224 | 0.222 | 0.205       | 1.783547e-10 | 11 |
| GID8         | ASC IgG    |       |             |              |    |
| 1.056473e-14 | -0.597995  | 0.79  | 0.622       | 1.883585e-10 | 11 |
| ATP5P0       | ASC IgG    |       |             |              |    |
| 1.187315e-14 | -0.3741238 | 0.18  | 0.181       | 2.116863e-10 | 11 |
| UTP18        | ASC IgG    |       |             |              |    |
| 1.239277e-14 | -0.5701148 | 0.523 | 0.414       | 2.209507e-10 | 11 |
| LAMTOR1      | ASC IgG    |       |             |              |    |
| 1.342554e-14 | -0.4278715 | 0.225 | 0.204       | 2.39364e-10  | 11 |
| OGA          | ASC IgG    |       |             |              |    |
| 1.448639e-14 | -0.4450001 | 0.287 | 0.25        | 2.582779e-10 | 11 |
| PFDN1        | ASC IgG    |       |             |              |    |
| 1.490948e-14 | -0.3003478 | 0.091 | 0.116       | 2.658212e-10 | 11 |
| C1orf174     | ASC IgG    |       |             |              |    |
| 1.651497e-14 | -0.3291037 | 0.097 | 0.112       | 2.944454e-10 | 11 |
| BRAF         | ASC IgG    |       |             |              |    |
| 1.659081e-14 | -0.4042661 | 0.19  | 0.189       | 2.957975e-10 | 11 |
| ATP1A1       | ASC IgG    |       |             |              |    |
| 1.696138e-14 | -0.6050749 | 0.546 | 0.435       | 3.024045e-10 | 11 |
| IL2RG        | ASC IgG    |       |             |              |    |
| 1.738662e-14 | -0.45847   | 0.229 | 3.09986e-10 | 11           | 11 |
| TTC19        | ASC IgG    |       |             |              |    |
| 1.755008e-14 | -0.3451452 | 0.114 | 0.129       | 3.129004e-10 | 11 |
| ERV3-1       | ASC IgG    |       |             |              |    |
| 1.958529e-14 | -0.3145674 | 0.118 | 0.133       | 3.491862e-10 | 11 |
| AP1S1        | ASC IgG    |       |             |              |    |
| 2.114141e-14 | -0.3592395 | 0.199 | 0.18        | 3.769302e-10 | 11 |
| ZNF106       | ASC IgG    |       |             |              |    |
| 2.419475e-14 | -0.6177746 | 0.681 | 0.541       | 4.313683e-10 | 11 |
| CNBP         | ASC IgG    |       |             |              |    |
| 2.583333e-14 | -0.4607541 | 0.273 | 0.241       | 4.605824e-10 | 11 |
| NCOA3        | ASC IgG    |       |             |              |    |
| 2.772692e-14 | -0.4999188 | 0.378 | 0.305       | 4.943433e-10 | 11 |
| MED4         | ASC IgG    |       |             |              |    |
| 2.888697e-14 | -0.5523523 | 0.427 | 0.335       | 5.150258e-10 | 11 |
| IER2         | ASC IgG    |       |             |              |    |
| 3.051431e-14 | -0.3664971 | 0.15  | 0.157       | 5.440396e-10 | 11 |
| NAA15        | ASC IgG    |       |             |              |    |
| 3.148705e-14 | -0.4340943 | 0.266 | 0.231       | 5.613826e-10 | 11 |
| COMMD8       | ASC IgG    |       |             |              |    |

|              |                |       |              |              |    |
|--------------|----------------|-------|--------------|--------------|----|
| 3.171715e-14 | -0.5607008     | 0.485 | 0.385        | 5.65485e-10  | 11 |
| PPIG         | ASC IgG        |       |              |              |    |
| 3.693508e-14 | -0.353823      | 0.149 | 0.16         | 6.585155e-10 | 11 |
| WBP4         | ASC IgG        |       |              |              |    |
| 4.077534e-14 | -0.4393975     | 0.218 | 0.198        | 7.269835e-10 | 11 |
| RSF1         | ASC IgG        |       |              |              |    |
| 4.424144e-14 | -0.4435663     | 0.278 | 0.247        | 7.887806e-10 | 11 |
| EXOSC8       | ASC IgG        |       |              |              |    |
| 4.473406e-14 | -0.3779869     | 0.189 | 0.189        | 7.975636e-10 | 11 |
| NCOA4        | ASC IgG        |       |              |              |    |
| 4.674756e-14 | -0.42612 0.225 | 0.195 | 8.334623e-10 | 11           |    |
| RBM5         | ASC IgG        |       |              |              |    |
| 5.120074e-14 | -0.4345673     | 0.188 | 0.188        | 9.12858e-10  | 11 |
| GPATCH4      | ASC IgG        |       |              |              |    |
| 5.467549e-14 | -0.6071547     | 0.702 | 0.561        | 9.748092e-10 | 11 |
| PCBP1        | ASC IgG        |       |              |              |    |
| 5.788659e-14 | -0.3015986     | 0.097 | 0.111        | 1.03206e-09  | 11 |
| IVNS1ABP     | ASC IgG        |       |              |              |    |
| 5.869921e-14 | -0.3863852     | 0.186 | 0.181        | 1.046548e-09 | 11 |
| TADA3        | ASC IgG        |       |              |              |    |
| 6.437006e-14 | -0.3630916     | 0.161 | 0.163        | 1.147654e-09 | 11 |
| NOL11        | ASC IgG        |       |              |              |    |
| 6.662245e-14 | -0.4527407     | 0.351 | 0.289        | 1.187812e-09 | 11 |
| CDC123       | ASC IgG        |       |              |              |    |
| 6.729646e-14 | -0.363309      | 0.127 | 0.142        | 1.199829e-09 | 11 |
| GLTP         | ASC IgG        |       |              |              |    |
| 6.814299e-14 | -0.3056502     | 0.106 | 0.118        | 1.214921e-09 | 11 |
| DCLRE1C      | ASC IgG        |       |              |              |    |
| 6.911543e-14 | -0.5042571     | 0.411 | 0.333        | 1.232259e-09 | 11 |
| ANXA11       | ASC IgG        |       |              |              |    |
| 7.043898e-14 | -0.4567112     | 0.302 | 0.258        | 1.255857e-09 | 11 |
| RAB14        | ASC IgG        |       |              |              |    |
| 7.046196e-14 | -0.4965624     | 0.21  | 0.211        | 1.256266e-09 | 11 |
| GABPB1-AS1   | ASC IgG        |       |              |              |    |
| 7.212296e-14 | -0.4028783     | 0.09  | 0.112        | 1.28588e-09  | 11 |
| C1orf56      | ASC IgG        |       |              |              |    |
| 7.315641e-14 | -0.7501734     | 0.695 | 0.555        | 1.304306e-09 | 11 |
| NCL          | ASC IgG        |       |              |              |    |
| 8.032319e-14 | -0.3727501     | 0.161 | 0.156        | 1.432082e-09 | 11 |
| ACAP2        | ASC IgG        |       |              |              |    |
| 8.664519e-14 | -0.3837343     | 0.134 | 0.147        | 1.544797e-09 | 11 |
| ARL8B        | ASC IgG        |       |              |              |    |
| 8.959579e-14 | -0.4363988     | 0.249 | 0.223        | 1.597403e-09 | 11 |
| WBP11        | ASC IgG        |       |              |              |    |
| 9.105899e-14 | -0.5160502     | 0.53  | 0.406        | 1.623491e-09 | 11 |
| SEPT6        | ASC IgG        |       |              |              |    |
| 9.497595e-14 | -0.4092802     | 0.191 | 0.18         | 1.693326e-09 | 11 |
| BDP1         | ASC IgG        |       |              |              |    |
| 9.877092e-14 | -0.3232767     | 0.114 | 0.123        | 1.760987e-09 | 11 |
| SMAD2        | ASC IgG        |       |              |              |    |

|              |            |       |       |              |    |
|--------------|------------|-------|-------|--------------|----|
| 1.027179e-13 | -0.4793128 | 0.235 | 0.217 | 1.831357e-09 | 11 |
| HMGCS1       | ASC IgG    |       |       |              |    |
| 1.095485e-13 | -0.3225076 | 0.115 | 0.133 | 1.95314e-09  | 11 |
| SMARCD1      | ASC IgG    |       |       |              |    |
| 1.259775e-13 | -0.4592837 | 0.298 | 0.258 | 2.246053e-09 | 11 |
| PWP1         | ASC IgG    |       |       |              |    |
| 1.338829e-13 | -0.5915136 | 0.517 | 0.398 | 2.386997e-09 | 11 |
| CMPK1        | ASC IgG    |       |       |              |    |
| 1.368079e-13 | -0.3432251 | 0.163 | 0.156 | 2.439147e-09 | 11 |
| TDP2         | ASC IgG    |       |       |              |    |
| 1.409345e-13 | -0.4634512 | 0.317 | 0.269 | 2.512722e-09 | 11 |
| SEPT9        | ASC IgG    |       |       |              |    |
| 1.527826e-13 | -0.4637049 | 0.226 | 0.192 | 2.72396e-09  | 11 |
| DNMT1        | ASC IgG    |       |       |              |    |
| 1.580336e-13 | -0.4779222 | 0.342 | 0.293 | 2.817582e-09 | 11 |
| ILF3         | ASC IgG    |       |       |              |    |
| 1.699461e-13 | -0.3427776 | 0.128 | 0.133 | 3.02997e-09  | 11 |
| WDR54        | ASC IgG    |       |       |              |    |
| 1.822737e-13 | -0.3717599 | 0.158 | 0.156 | 3.249758e-09 | 11 |
| RRAGC        | ASC IgG    |       |       |              |    |
| 1.874578e-13 | -0.4287808 | 0.307 | 0.261 | 3.342186e-09 | 11 |
| ATXN10       | ASC IgG    |       |       |              |    |
| 1.920716e-13 | -0.6379554 | 0.441 | 0.337 | 3.424445e-09 | 11 |
| LRMP         | ASC IgG    |       |       |              |    |
| 1.954849e-13 | -0.3594704 | 0.149 | 0.15  | 3.4853e-09   | 11 |
| ATF1         | ASC IgG    |       |       |              |    |
| 1.992744e-13 | -0.4622169 | 0.34  | 0.284 | 3.552863e-09 | 11 |
| SNW1         | ASC IgG    |       |       |              |    |
| 2.014393e-13 | -0.5221957 | 0.395 | 0.318 | 3.591461e-09 | 11 |
| LSM4         | ASC IgG    |       |       |              |    |
| 2.065946e-13 | -0.4516775 | 0.294 | 0.256 | 3.683374e-09 | 11 |
| UPF3A        | ASC IgG    |       |       |              |    |
| 2.119644e-13 | -0.4463015 | 0.282 | 0.238 | 3.779113e-09 | 11 |
| FBX07        | ASC IgG    |       |       |              |    |
| 2.301778e-13 | -0.628488  | 0.828 | 0.64  | 4.103839e-09 | 11 |
| SNRPG        | ASC IgG    |       |       |              |    |
| 2.475588e-13 | -0.3748271 | 0.143 | 0.15  | 4.413725e-09 | 11 |
| PUM3         | ASC IgG    |       |       |              |    |
| 2.491923e-13 | -0.5491668 | 0.553 | 0.427 | 4.442849e-09 | 11 |
| CLTA         | ASC IgG    |       |       |              |    |
| 2.824363e-13 | -0.5285361 | 0.372 | 0.283 | 5.035557e-09 | 11 |
| PPM1K        | ASC IgG    |       |       |              |    |
| 3.246195e-13 | -0.432682  | 0.155 | 0.162 | 5.787641e-09 | 11 |
| FAM215B      | ASC IgG    |       |       |              |    |
| 3.263177e-13 | -0.4073249 | 0.205 | 0.188 | 5.817918e-09 | 11 |
| LYRM2        | ASC IgG    |       |       |              |    |
| 3.333368e-13 | -0.4198664 | 0.23  | 0.205 | 5.943062e-09 | 11 |
| UPF3B        | ASC IgG    |       |       |              |    |
| 3.357046e-13 | -0.3111068 | 0.118 | 0.129 | 5.985278e-09 | 11 |
| SMARCE1      | ASC IgG    |       |       |              |    |

|              |            |       |       |              |    |
|--------------|------------|-------|-------|--------------|----|
| 3.673367e-13 | -0.3701971 | 0.184 | 0.174 | 6.549246e-09 | 11 |
| VPS26A       | ASC IgG    |       |       |              |    |
| 3.805057e-13 | -0.3994428 | 0.249 | 0.214 | 6.784037e-09 | 11 |
| SNRNP25      | ASC IgG    |       |       |              |    |
| 3.939538e-13 | -0.4219995 | 0.232 | 0.21  | 7.023802e-09 | 11 |
| ARPP19       | ASC IgG    |       |       |              |    |
| 4.02144e-13  | -0.5162284 | 0.425 | 0.329 | 7.169825e-09 | 11 |
| BPTF         | ASC IgG    |       |       |              |    |
| 4.066103e-13 | -0.5764197 | 0.527 | 0.394 | 7.249454e-09 | 11 |
| ORAI2        | ASC IgG    |       |       |              |    |
| 4.155976e-13 | -0.4522759 | 0.323 | 0.274 | 7.40969e-09  | 11 |
| MRPL47       | ASC IgG    |       |       |              |    |
| 4.497873e-13 | -0.4181236 | 0.275 | 0.229 | 8.019258e-09 | 11 |
| OAZ2         | ASC IgG    |       |       |              |    |
| 4.534583e-13 | -0.6652489 | 0.722 | 0.571 | 8.084708e-09 | 11 |
| APRT         | ASC IgG    |       |       |              |    |
| 4.723797e-13 | -0.3555017 | 0.121 | 0.117 | 8.422057e-09 | 11 |
| SAMD9        | ASC IgG    |       |       |              |    |
| 5.525048e-13 | -0.4794106 | 0.329 | 0.268 | 9.850608e-09 | 11 |
| CNOT7        | ASC IgG    |       |       |              |    |
| 5.778715e-13 | -0.4039718 | 0.209 | 0.191 | 1.030287e-08 | 11 |
| ARFGAP2      | ASC IgG    |       |       |              |    |
| 6.072425e-13 | -0.5245469 | 0.458 | 0.363 | 1.082653e-08 | 11 |
| LUC7L3       | ASC IgG    |       |       |              |    |
| 6.393344e-13 | -0.3597733 | 0.192 | 0.174 | 1.139869e-08 | 11 |
| PPP2R3C      | ASC IgG    |       |       |              |    |
| 6.579427e-13 | -0.3239998 | 0.105 | 0.12  | 1.173046e-08 | 11 |
| NCBP3        | ASC IgG    |       |       |              |    |
| 6.585284e-13 | -0.3222129 | 0.101 | 0.123 | 1.17409e-08  | 11 |
| CCDC137      | ASC IgG    |       |       |              |    |
| 6.81879e-13  | -0.3830838 | 0.199 | 0.173 | 1.215722e-08 | 11 |
| BLCAP        | ASC IgG    |       |       |              |    |
| 6.990345e-13 | -0.3576507 | 0.154 | 0.154 | 1.246309e-08 | 11 |
| CFAP97       | ASC IgG    |       |       |              |    |
| 7.472926e-13 | -0.3944363 | 0.23  | 0.204 | 1.332348e-08 | 11 |
| MTMR14       | ASC IgG    |       |       |              |    |
| 7.596892e-13 | -0.3451158 | 0.155 | 0.155 | 1.35445e-08  | 11 |
| C15orf40     | ASC IgG    |       |       |              |    |
| 7.741984e-13 | -0.3865321 | 0.207 | 0.192 | 1.380318e-08 | 11 |
| TFAM         | ASC IgG    |       |       |              |    |
| 8.617752e-13 | -0.3321779 | 0.138 | 0.139 | 1.536459e-08 | 11 |
| GLUD1        | ASC IgG    |       |       |              |    |
| 1.105916e-12 | -0.3228223 | 0.143 | 0.14  | 1.971738e-08 | 11 |
| ABHD14B      | ASC IgG    |       |       |              |    |
| 1.170526e-12 | -0.4432474 | 0.276 | 0.241 | 2.086931e-08 | 11 |
| POLD2        | ASC IgG    |       |       |              |    |
| 1.20312e-12  | -0.4130775 | 0.307 | 0.264 | 2.145043e-08 | 11 |
| MTCH2        | ASC IgG    |       |       |              |    |
| 1.261455e-12 | -0.341684  | 0.153 | 0.152 | 2.249049e-08 | 11 |
| RBM14        | ASC IgG    |       |       |              |    |

|              |                |       |              |              |    |
|--------------|----------------|-------|--------------|--------------|----|
| 1.300798e-12 | -0.3489425     | 0.119 | 0.129        | 2.319192e-08 | 11 |
| ZC3H8        | ASC IgG        |       |              |              |    |
| 1.35405e-12  | -0.4432021     | 0.332 | 0.254        | 2.414136e-08 | 11 |
| ATG12        | ASC IgG        |       |              |              |    |
| 1.613876e-12 | -0.4949947     | 0.413 | 0.322        | 2.877379e-08 | 11 |
| CCDC12       | ASC IgG        |       |              |              |    |
| 1.733737e-12 | -0.5563915     | 0.527 | 0.407        | 3.091079e-08 | 11 |
| HNRNPR       | ASC IgG        |       |              |              |    |
| 1.833598e-12 | -0.5042022     | 0.436 | 0.341        | 3.269121e-08 | 11 |
| ATRX         | ASC IgG        |       |              |              |    |
| 1.892162e-12 | -0.4149021     | 0.258 | 0.222        | 3.373536e-08 | 11 |
| MTCH1        | ASC IgG        |       |              |              |    |
| 2.024712e-12 | 0.3816056      | 0.131 | 0.049        | 3.609859e-08 | 11 |
| CCL3         | ASC IgG        |       |              |              |    |
| 2.059342e-12 | -0.3264544     | 0.11  | 0.119        | 3.671602e-08 | 11 |
| RNF41        | ASC IgG        |       |              |              |    |
| 2.201301e-12 | -0.3179348     | 0.138 | 0.134        | 3.924699e-08 | 11 |
| UTP3         | ASC IgG        |       |              |              |    |
| 2.217411e-12 | -0.4055206     | 0.189 | 0.171        | 3.953422e-08 | 11 |
| TRIM44       | ASC IgG        |       |              |              |    |
| 2.369126e-12 | -0.4084561     | 0.298 | 0.246        | 4.223914e-08 | 11 |
| HAT1         | ASC IgG        |       |              |              |    |
| 2.479677e-12 | -0.31568 0.125 | 0.13  | 4.421015e-08 | 11           |    |
| TGS1         | ASC IgG        |       |              |              |    |
| 2.63525e-12  | -0.5222784     | 0.375 | 0.327        | 4.698387e-08 | 11 |
| HNRNPH1      | ASC IgG        |       |              |              |    |
| 2.685588e-12 | -0.6266434     | 0.66  | 0.51         | 4.788135e-08 | 11 |
| SSBP1        | ASC IgG        |       |              |              |    |
| 2.88243e-12  | -0.5359924     | 0.629 | 0.489        | 5.139084e-08 | 11 |
| THRAP3       | ASC IgG        |       |              |              |    |
| 2.983316e-12 | -0.3129662     | 0.142 | 0.142        | 5.318953e-08 | 11 |
| MRPL45       | ASC IgG        |       |              |              |    |
| 3.002517e-12 | -0.3294574     | 0.145 | 0.146        | 5.353187e-08 | 11 |
| ANKRD13A     | ASC IgG        |       |              |              |    |
| 3.116377e-12 | -0.3646203     | 0.158 | 0.155        | 5.556188e-08 | 11 |
| EEF1G        | ASC IgG        |       |              |              |    |
| 3.33131e-12  | -0.3741831     | 0.203 | 0.182        | 5.939393e-08 | 11 |
| CCDC90B      | ASC IgG        |       |              |              |    |
| 3.334451e-12 | -0.4611043     | 0.363 | 0.302        | 5.944993e-08 | 11 |
| GLRX3        | ASC IgG        |       |              |              |    |
| 3.60266e-12  | -0.4079911     | 0.257 | 0.221        | 6.423182e-08 | 11 |
| FXR1         | ASC IgG        |       |              |              |    |
| 3.61124e-12  | -0.4292591     | 0.211 | 0.194        | 6.43848e-08  | 11 |
| ESF1         | ASC IgG        |       |              |              |    |
| 3.925746e-12 | -0.3683391     | 0.158 | 0.147        | 6.999212e-08 | 11 |
| TSPAN3       | ASC IgG        |       |              |              |    |
| 4.176131e-12 | -0.3414987     | 0.163 | 0.15         | 7.445623e-08 | 11 |
| FADS3        | ASC IgG        |       |              |              |    |
| 4.248028e-12 | -0.5000129     | 0.423 | 0.326        | 7.573809e-08 | 11 |
| SLTM         | ASC IgG        |       |              |              |    |

|              |            |       |       |              |    |
|--------------|------------|-------|-------|--------------|----|
| 4.34422e-12  | -0.3430743 | 0.168 | 0.158 | 7.745309e-08 | 11 |
| CTSZ         | ASC IgG    |       |       |              |    |
| 4.676575e-12 | -0.6108128 | 0.799 | 0.634 | 8.337865e-08 | 11 |
| ANAPC16      | ASC IgG    |       |       |              |    |
| 4.757062e-12 | -0.3998053 | 0.23  | 0.206 | 8.481367e-08 | 11 |
| BRIX1        | ASC IgG    |       |       |              |    |
| 4.809967e-12 | -0.3215491 | 0.132 | 0.13  | 8.575689e-08 | 11 |
| CRLF3        | ASC IgG    |       |       |              |    |
| 5.531033e-12 | -0.5455485 | 0.633 | 0.49  | 9.861279e-08 | 11 |
| AP2M1        | ASC IgG    |       |       |              |    |
| 5.619411e-12 | -0.5017001 | 0.558 | 0.412 | 1.001885e-07 | 11 |
| PPP1CC       | ASC IgG    |       |       |              |    |
| 5.929029e-12 | -0.4919672 | 0.298 | 0.23  | 1.057087e-07 | 11 |
| HSD17B11     | ASC IgG    |       |       |              |    |
| 6.169902e-12 | -0.5092396 | 0.472 | 0.36  | 1.100032e-07 | 11 |
| NCOR1        | ASC IgG    |       |       |              |    |
| 6.397735e-12 | -0.3829296 | 0.188 | 0.176 | 1.140652e-07 | 11 |
| RGS19        | ASC IgG    |       |       |              |    |
| 6.68558e-12  | -0.3482837 | 0.173 | 0.159 | 1.191972e-07 | 11 |
| RBCK1        | ASC IgG    |       |       |              |    |
| 7.310291e-12 | -0.3841917 | 0.15  | 0.145 | 1.303352e-07 | 11 |
| TSPYL1       | ASC IgG    |       |       |              |    |
| 7.68975e-12  | -0.3733184 | 0.19  | 0.177 | 1.371005e-07 | 11 |
| POLR3GL      | ASC IgG    |       |       |              |    |
| 7.847261e-12 | -0.374062  | 0.151 | 0.145 | 1.399088e-07 | 11 |
| PAFAH1B2     | ASC IgG    |       |       |              |    |
| 8.739305e-12 | -0.3395288 | 0.152 | 0.15  | 1.558131e-07 | 11 |
| ADSS         | ASC IgG    |       |       |              |    |
| 8.788454e-12 | -0.3019949 | 0.109 | 0.113 | 1.566894e-07 | 11 |
| SENP6        | ASC IgG    |       |       |              |    |
| 9.042401e-12 | -0.3595484 | 0.205 | 0.185 | 1.61217e-07  | 11 |
| NECAP2       | ASC IgG    |       |       |              |    |
| 9.075358e-12 | -0.3149686 | 0.154 | 0.147 | 1.618046e-07 | 11 |
| RBM38        | ASC IgG    |       |       |              |    |
| 9.107986e-12 | -0.3985882 | 0.236 | 0.211 | 1.623863e-07 | 11 |
| PBDC1        | ASC IgG    |       |       |              |    |
| 9.223113e-12 | -0.5251223 | 0.242 | 0.209 | 1.644389e-07 | 11 |
| MGST3        | ASC IgG    |       |       |              |    |
| 9.266542e-12 | -0.3418268 | 0.138 | 0.134 | 1.652132e-07 | 11 |
| ZNF75A       | ASC IgG    |       |       |              |    |
| 1.045508e-11 | -0.3395134 | 0.165 | 0.154 | 1.864036e-07 | 11 |
| PDCD6IP      | ASC IgG    |       |       |              |    |
| 1.06913e-11  | -0.5889318 | 0.821 | 0.648 | 1.906152e-07 | 11 |
| UBE2D3       | ASC IgG    |       |       |              |    |
| 1.122645e-11 | -0.3347651 | 0.123 | 0.122 | 2.001564e-07 | 11 |
| SP140L       | ASC IgG    |       |       |              |    |
| 1.128175e-11 | -0.435718  | 0.306 | 0.243 | 2.011424e-07 | 11 |
| EPC1         | ASC IgG    |       |       |              |    |
| 1.142826e-11 | -0.4487317 | 0.335 | 0.258 | 2.037545e-07 | 11 |
| MAT2B        | ASC IgG    |       |       |              |    |

|              |            |       |       |              |    |
|--------------|------------|-------|-------|--------------|----|
| 1.185257e-11 | -0.6214426 | 0.581 | 0.441 | 2.113194e-07 | 11 |
| C1QBP        | ASC IgG    |       |       |              |    |
| 1.28284e-11  | -0.3304864 | 0.154 | 0.148 | 2.287175e-07 | 11 |
| UBE2D1       | ASC IgG    |       |       |              |    |
| 1.283717e-11 | -0.3629564 | 0.201 | 0.18  | 2.28874e-07  | 11 |
| PLRG1        | ASC IgG    |       |       |              |    |
| 1.297796e-11 | -0.4396578 | 0.321 | 0.261 | 2.31384e-07  | 11 |
| ANP32E       | ASC IgG    |       |       |              |    |
| 1.35191e-11  | -0.6477946 | 0.394 | 0.315 | 2.410321e-07 | 11 |
| DDX21        | ASC IgG    |       |       |              |    |
| 1.363352e-11 | -0.4985801 | 0.449 | 0.327 | 2.43072e-07  | 11 |
| TSP0         | ASC IgG    |       |       |              |    |
| 1.37236e-11  | -0.4450097 | 0.331 | 0.275 | 2.446781e-07 | 11 |
| QARS         | ASC IgG    |       |       |              |    |
| 1.432541e-11 | -0.5312151 | 0.473 | 0.365 | 2.554078e-07 | 11 |
| PFDN2        | ASC IgG    |       |       |              |    |
| 1.48092e-11  | -0.3157552 | 0.159 | 0.153 | 2.640333e-07 | 11 |
| DTYMK        | ASC IgG    |       |       |              |    |
| 1.531809e-11 | -0.3542734 | 0.222 | 0.195 | 2.731062e-07 | 11 |
| GRSF1        | ASC IgG    |       |       |              |    |
| 1.694221e-11 | -0.3046945 | 0.161 | 0.14  | 3.020627e-07 | 11 |
| MKNK2        | ASC IgG    |       |       |              |    |
| 1.797183e-11 | -0.3890093 | 0.255 | 0.219 | 3.204198e-07 | 11 |
| NUTF2        | ASC IgG    |       |       |              |    |
| 1.902995e-11 | -0.3775801 | 0.256 | 0.214 | 3.39285e-07  | 11 |
| IMMT         | ASC IgG    |       |       |              |    |
| 1.972618e-11 | -0.5340372 | 0.646 | 0.477 | 3.516981e-07 | 11 |
| TRA2B        | ASC IgG    |       |       |              |    |
| 2.133914e-11 | -0.4071293 | 0.215 | 0.19  | 3.804555e-07 | 11 |
| AP2B1        | ASC IgG    |       |       |              |    |
| 2.152693e-11 | -0.3136544 | 0.105 | 0.117 | 3.838037e-07 | 11 |
| VRK2         | ASC IgG    |       |       |              |    |
| 2.244784e-11 | -0.3066024 | 0.139 | 0.143 | 4.002225e-07 | 11 |
| STK25        | ASC IgG    |       |       |              |    |
| 2.246758e-11 | -0.4268819 | 0.272 | 0.222 | 4.005745e-07 | 11 |
| PHIP         | ASC IgG    |       |       |              |    |
| 2.247272e-11 | -0.4937508 | 0.461 | 0.35  | 4.006661e-07 | 11 |
| RTF1         | ASC IgG    |       |       |              |    |
| 2.452595e-11 | -0.3079199 | 0.173 | 0.159 | 4.372731e-07 | 11 |
| VRK1         | ASC IgG    |       |       |              |    |
| 2.603457e-11 | -0.3335003 | 0.15  | 0.146 | 4.641703e-07 | 11 |
| PANK2        | ASC IgG    |       |       |              |    |
| 2.861249e-11 | -0.4626324 | 0.367 | 0.302 | 5.101321e-07 | 11 |
| KARS         | ASC IgG    |       |       |              |    |
| 2.970872e-11 | -0.4319268 | 0.31  | 0.239 | 5.296768e-07 | 11 |
| DRAM2        | ASC IgG    |       |       |              |    |
| 2.973447e-11 | -0.3237952 | 0.178 | 0.164 | 5.301358e-07 | 11 |
| SAE1         | ASC IgG    |       |       |              |    |
| 3.180869e-11 | -0.4055845 | 0.24  | 0.205 | 5.671171e-07 | 11 |
| CFDP1        | ASC IgG    |       |       |              |    |



|              |            |       |       |              |    |
|--------------|------------|-------|-------|--------------|----|
| 3.3098e-11   | -0.3966436 | 0.094 | 0.134 | 5.901043e-07 | 11 |
| SULF2        | ASC IgG    |       |       |              |    |
| 3.31884e-11  | -0.5370622 | 0.53  | 0.413 | 5.917159e-07 | 11 |
| PRRC2C       | ASC IgG    |       |       |              |    |
| 4.099545e-11 | -0.3110338 | 0.125 | 0.123 | 7.309078e-07 | 11 |
| HTATIP2      | ASC IgG    |       |       |              |    |
| 4.512967e-11 | -0.3909944 | 0.26  | 0.221 | 8.046168e-07 | 11 |
| ADH5         | ASC IgG    |       |       |              |    |
| 4.909228e-11 | -0.3066526 | 0.166 | 0.155 | 8.752662e-07 | 11 |
| RPP30        | ASC IgG    |       |       |              |    |
| 5.03803e-11  | -0.3020753 | 0.122 | 0.117 | 8.982303e-07 | 11 |
| CRYZL1       | ASC IgG    |       |       |              |    |
| 5.707594e-11 | -0.366344  | 0.241 | 0.21  | 1.017607e-06 | 11 |
| EEF1E1       | ASC IgG    |       |       |              |    |
| 6.230753e-11 | -0.3226885 | 0.173 | 0.163 | 1.110881e-06 | 11 |
| PPID         | ASC IgG    |       |       |              |    |
| 6.456191e-11 | -0.5536939 | 0.959 | 0.886 | 1.151074e-06 | 11 |
| GAPDH        | ASC IgG    |       |       |              |    |
| 6.851764e-11 | -0.3665459 | 0.123 | 0.123 | 1.221601e-06 | 11 |
| DDAH2        | ASC IgG    |       |       |              |    |
| 6.992571e-11 | -0.305946  | 0.125 | 0.127 | 1.246706e-06 | 11 |
| CHMP1A       | ASC IgG    |       |       |              |    |
| 7.394553e-11 | -0.3348754 | 0.161 | 0.151 | 1.318375e-06 | 11 |
| TATDN1       | ASC IgG    |       |       |              |    |
| 8.001869e-11 | -0.4952291 | 0.527 | 0.377 | 1.426653e-06 | 11 |
| LSM8         | ASC IgG    |       |       |              |    |
| 8.692109e-11 | -0.4965861 | 0.809 | 0.648 | 1.549716e-06 | 11 |
| YWHAB        | ASC IgG    |       |       |              |    |
| 9.356155e-11 | -0.4197223 | 0.28  | 0.237 | 1.668109e-06 | 11 |
| KRR1         | ASC IgG    |       |       |              |    |
| 1.045403e-10 | -0.3392242 | 0.093 | 0.109 | 1.863848e-06 | 11 |
| SNX9         | ASC IgG    |       |       |              |    |
| 1.12118e-10  | -0.3620012 | 0.279 | 0.226 | 1.998951e-06 | 11 |
| NSMCE1       | ASC IgG    |       |       |              |    |
| 1.149328e-10 | -0.3767294 | 0.273 | 0.226 | 2.049137e-06 | 11 |
| DDX54        | ASC IgG    |       |       |              |    |
| 1.262208e-10 | -0.3421666 | 0.225 | 0.195 | 2.25039e-06  | 11 |
| UBE2E1       | ASC IgG    |       |       |              |    |
| 1.359876e-10 | -0.3357578 | 0.183 | 0.167 | 2.424523e-06 | 11 |
| MIF4GD       | ASC IgG    |       |       |              |    |
| 1.382373e-10 | -0.3509871 | 0.179 | 0.16  | 2.464633e-06 | 11 |
| COX19        | ASC IgG    |       |       |              |    |
| 1.384309e-10 | -0.4428716 | 0.302 | 0.243 | 2.468085e-06 | 11 |
| PFKL         | ASC IgG    |       |       |              |    |
| 1.491387e-10 | -0.3561922 | 0.118 | 0.131 | 2.658993e-06 | 11 |
| RP9          | ASC IgG    |       |       |              |    |
| 1.520835e-10 | -0.5426478 | 0.581 | 0.449 | 2.711497e-06 | 11 |
| VDAC1        | ASC IgG    |       |       |              |    |
| 1.582594e-10 | -0.3679851 | 0.216 | 0.189 | 2.821608e-06 | 11 |
| OARD1        | ASC IgG    |       |       |              |    |

|              |            |       |       |              |              |    |
|--------------|------------|-------|-------|--------------|--------------|----|
| 1.610402e-10 | -0.3903    | 0.283 | 0.232 | 2.871186e-06 | 11           |    |
| PHF5A        | ASC IgG    |       |       |              |              |    |
| 1.647898e-10 | -0.4708615 |       | 0.428 | 0.332        | 2.938038e-06 | 11 |
| TPR          | ASC IgG    |       |       |              |              |    |
| 1.683633e-10 | -0.3182822 |       | 0.154 | 0.145        | 3.00175e-06  | 11 |
| C1orf35      | ASC IgG    |       |       |              |              |    |
| 1.777494e-10 | -0.3012046 |       | 0.143 | 0.143        | 3.169093e-06 | 11 |
| NIP7         | ASC IgG    |       |       |              |              |    |
| 1.850562e-10 | -0.4027406 |       | 0.293 | 0.247        | 3.299367e-06 | 11 |
| MEA1         | ASC IgG    |       |       |              |              |    |
| 1.864023e-10 | -0.3506123 |       | 0.221 | 0.188        | 3.323367e-06 | 11 |
| PPP2R2A      | ASC IgG    |       |       |              |              |    |
| 2.231259e-10 | -0.4805484 |       | 0.462 | 0.344        | 3.978111e-06 | 11 |
| RBM17        | ASC IgG    |       |       |              |              |    |
| 2.25509e-10  | -0.4864638 |       | 0.345 | 0.279        | 4.0206e-06   | 11 |
| MSM01        | ASC IgG    |       |       |              |              |    |
| 2.308508e-10 | -0.3052148 |       | 0.165 | 0.158        | 4.115839e-06 | 11 |
| TRIAP1       | ASC IgG    |       |       |              |              |    |
| 2.389036e-10 | -0.3421438 |       | 0.245 | 0.204        | 4.259412e-06 | 11 |
| SNAPIN       | ASC IgG    |       |       |              |              |    |
| 2.623759e-10 | -0.3414618 |       | 0.151 | 0.129        | 4.677899e-06 | 11 |
| CLK4         | ASC IgG    |       |       |              |              |    |
| 2.67102e-10  | -0.4027454 |       | 0.268 | 0.22         | 4.762161e-06 | 11 |
| POLE3        | ASC IgG    |       |       |              |              |    |
| 2.718992e-10 | -0.3559743 |       | 0.234 | 0.199        | 4.847691e-06 | 11 |
| THYN1        | ASC IgG    |       |       |              |              |    |
| 2.783204e-10 | -0.3051735 |       | 0.181 | 0.159        | 4.962174e-06 | 11 |
| TPGS2        | ASC IgG    |       |       |              |              |    |
| 3.266035e-10 | -0.4057699 |       | 0.293 | 0.239        | 5.823014e-06 | 11 |
| SUM03        | ASC IgG    |       |       |              |              |    |
| 3.296808e-10 | -0.3468778 |       | 0.201 | 0.178        | 5.877878e-06 | 11 |
| DUSP11       | ASC IgG    |       |       |              |              |    |
| 3.540901e-10 | -0.3741154 |       | 0.287 | 0.239        | 6.313072e-06 | 11 |
| SRSF1        | ASC IgG    |       |       |              |              |    |
| 3.543142e-10 | -0.323655  |       | 0.159 | 0.151        | 6.317068e-06 | 11 |
| AFG3L2       | ASC IgG    |       |       |              |              |    |
| 3.58414e-10  | -0.3338435 |       | 0.192 | 0.171        | 6.390163e-06 | 11 |
| THOC3        | ASC IgG    |       |       |              |              |    |
| 3.727064e-10 | -0.4167811 |       | 0.333 | 0.274        | 6.644982e-06 | 11 |
| TMEM14B      | ASC IgG    |       |       |              |              |    |
| 3.942464e-10 | -0.3497767 |       | 0.167 | 0.153        | 7.02902e-06  | 11 |
| RRP15        | ASC IgG    |       |       |              |              |    |
| 4.183632e-10 | -0.350586  |       | 0.2   | 0.182        | 7.458997e-06 | 11 |
| AHCY         | ASC IgG    |       |       |              |              |    |
| 4.719489e-10 | -0.3225764 |       | 0.218 | 0.176        | 8.414377e-06 | 11 |
| PLIN3        | ASC IgG    |       |       |              |              |    |
| 5.861828e-10 | -0.3611545 |       | 0.245 | 0.208        | 1.045105e-05 | 11 |
| MRPS35       | ASC IgG    |       |       |              |              |    |
| 5.87755e-10  | -0.5192887 |       | 0.674 | 0.497        | 1.047908e-05 | 11 |
| RTRAF        | ASC IgG    |       |       |              |              |    |

|              |            |       |       |              |    |
|--------------|------------|-------|-------|--------------|----|
| 6.815381e-10 | -0.3375675 | 0.204 | 0.184 | 1.215114e-05 | 11 |
| HDAC3        | ASC IgG    |       |       |              |    |
| 7.021239e-10 | -0.3624723 | 0.207 | 0.179 | 1.251817e-05 | 11 |
| MICU2        | ASC IgG    |       |       |              |    |
| 7.129424e-10 | -0.3554614 | 0.187 | 0.168 | 1.271105e-05 | 11 |
| TMEM154      | ASC IgG    |       |       |              |    |
| 7.754372e-10 | -0.3572079 | 0.222 | 0.189 | 1.382527e-05 | 11 |
| LYPLA2       | ASC IgG    |       |       |              |    |
| 7.860657e-10 | -0.3419063 | 0.177 | 0.156 | 1.401477e-05 | 11 |
| GAR1         | ASC IgG    |       |       |              |    |
| 7.906937e-10 | -0.3203733 | 0.179 | 0.155 | 1.409728e-05 | 11 |
| COMMD2       | ASC IgG    |       |       |              |    |
| 8.021305e-10 | -0.4173056 | 0.345 | 0.269 | 1.430118e-05 | 11 |
| XRN2         | ASC IgG    |       |       |              |    |
| 8.172872e-10 | -0.531094  | 0.86  | 0.691 | 1.457141e-05 | 11 |
| ATP5MPL      | ASC IgG    |       |       |              |    |
| 9.167701e-10 | -0.3535479 | 0.191 | 0.162 | 1.634509e-05 | 11 |
| KIAA1551     | ASC IgG    |       |       |              |    |
| 1.122041e-09 | -0.3845061 | 0.257 | 0.215 | 2.000487e-05 | 11 |
| AATF         | ASC IgG    |       |       |              |    |
| 1.130211e-09 | -0.3662147 | 0.264 | 0.214 | 2.015053e-05 | 11 |
| HAUS1        | ASC IgG    |       |       |              |    |
| 1.207531e-09 | -0.3378022 | 0.216 | 0.18  | 2.152906e-05 | 11 |
| MRPL44       | ASC IgG    |       |       |              |    |
| 1.215706e-09 | -0.5066398 | 0.588 | 0.452 | 2.167482e-05 | 11 |
| PSMD4        | ASC IgG    |       |       |              |    |
| 1.231735e-09 | -0.3363362 | 0.17  | 0.156 | 2.19606e-05  | 11 |
| NAMPT        | ASC IgG    |       |       |              |    |
| 1.242595e-09 | -0.4817175 | 0.506 | 0.381 | 2.215423e-05 | 11 |
| UQCRC2       | ASC IgG    |       |       |              |    |
| 1.247834e-09 | -0.5294926 | 0.646 | 0.471 | 2.224763e-05 | 11 |
| N4BP2L2      | ASC IgG    |       |       |              |    |
| 1.25216e-09  | -0.3932637 | 0.308 | 0.252 | 2.232476e-05 | 11 |
| DDX27        | ASC IgG    |       |       |              |    |
| 1.2637e-09   | -0.4397464 | 0.418 | 0.312 | 2.25305e-05  | 11 |
| FAM133B      | ASC IgG    |       |       |              |    |
| 1.276619e-09 | -0.3456796 | 0.17  | 0.154 | 2.276085e-05 | 11 |
| FAM162A      | ASC IgG    |       |       |              |    |
| 1.323078e-09 | -0.351958  | 0.153 | 0.133 | 2.358917e-05 | 11 |
| ODF2L        | ASC IgG    |       |       |              |    |
| 1.492283e-09 | -0.4136533 | 0.322 | 0.259 | 2.660591e-05 | 11 |
| BAZ1A        | ASC IgG    |       |       |              |    |
| 1.596694e-09 | -0.4117504 | 0.349 | 0.265 | 2.846746e-05 | 11 |
| MIEN1        | ASC IgG    |       |       |              |    |
| 1.61042e-09  | -0.3126767 | 0.172 | 0.148 | 2.871218e-05 | 11 |
| GIT2         | ASC IgG    |       |       |              |    |
| 1.61763e-09  | -0.615408  | 0.647 | 0.488 | 2.884073e-05 | 11 |
| ANKRD12      | ASC IgG    |       |       |              |    |
| 1.620132e-09 | -0.3368884 | 0.2   | 0.169 | 2.888534e-05 | 11 |
| ZFR          | ASC IgG    |       |       |              |    |

|              |                |       |              |              |    |
|--------------|----------------|-------|--------------|--------------|----|
| 1.672683e-09 | -0.5353879     | 0.536 | 0.384        | 2.982227e-05 | 11 |
| EVI2B        | ASC IgG        |       |              |              |    |
| 1.71775e-09  | -0.5024571     | 0.556 | 0.413        | 3.062576e-05 | 11 |
| RAB7A        | ASC IgG        |       |              |              |    |
| 1.730478e-09 | -0.341816      | 0.196 | 0.164        | 3.08527e-05  | 11 |
| C1orf131     | ASC IgG        |       |              |              |    |
| 1.74622e-09  | -0.4894666     | 0.507 | 0.387        | 3.113336e-05 | 11 |
| IK           | ASC IgG        |       |              |              |    |
| 1.876633e-09 | -0.3899756     | 0.268 | 0.224        | 3.345848e-05 | 11 |
| DCAF13       | ASC IgG        |       |              |              |    |
| 2.167594e-09 | -0.5578204     | 0.751 | 0.601        | 3.864603e-05 | 11 |
| RBM3         | ASC IgG        |       |              |              |    |
| 2.370463e-09 | -0.409444      | 0.357 | 0.277        | 4.226298e-05 | 11 |
| VBP1         | ASC IgG        |       |              |              |    |
| 2.526158e-09 | -0.405014      | 0.313 | 0.235        | 4.503888e-05 | 11 |
| ZNF22        | ASC IgG        |       |              |              |    |
| 2.75148e-09  | -0.3396673     | 0.173 | 0.142        | 4.905613e-05 | 11 |
| DUSP1        | ASC IgG        |       |              |              |    |
| 2.883383e-09 | -0.5399965     | 0.837 | 0.693        | 5.140783e-05 | 11 |
| HLA-DQB1     | ASC IgG        |       |              |              |    |
| 2.936879e-09 | -0.4149145     | 0.359 | 0.28         | 5.236162e-05 | 11 |
| GGNBP2       | ASC IgG        |       |              |              |    |
| 3.074267e-09 | -0.41518 0.301 | 0.239 | 5.481111e-05 | 11           |    |
| RBM23        | ASC IgG        |       |              |              |    |
| 3.22492e-09  | -0.3343086     | 0.18  | 0.167        | 5.74971e-05  | 11 |
| MMAB         | ASC IgG        |       |              |              |    |
| 3.812825e-09 | -0.4026133     | 0.325 | 0.245        | 6.797885e-05 | 11 |
| OSTF1        | ASC IgG        |       |              |              |    |
| 4.064252e-09 | -0.4097467     | 0.22  | 0.181        | 7.246155e-05 | 11 |
| CMSS1        | ASC IgG        |       |              |              |    |
| 4.160615e-09 | -0.3276063     | 0.176 | 0.149        | 7.41796e-05  | 11 |
| CHD1         | ASC IgG        |       |              |              |    |
| 4.595859e-09 | -0.4102452     | 0.321 | 0.247        | 8.193956e-05 | 11 |
| SH3KBP1      | ASC IgG        |       |              |              |    |
| 4.649693e-09 | -0.3645293     | 0.321 | 0.252        | 8.289938e-05 | 11 |
| NDUFA10      | ASC IgG        |       |              |              |    |
| 4.852751e-09 | -0.4628444     | 0.409 | 0.303        | 8.65197e-05  | 11 |
| EAPP         | ASC IgG        |       |              |              |    |
| 4.912401e-09 | -0.4449189     | 0.367 | 0.286        | 8.75832e-05  | 11 |
| U2SURP       | ASC IgG        |       |              |              |    |
| 5.439726e-09 | -0.3909373     | 0.321 | 0.252        | 9.698488e-05 | 11 |
| LUC7L2       | ASC IgG        |       |              |              |    |
| 5.589937e-09 | -0.3244617     | 0.177 | 0.151        | 9.9663e-05   | 11 |
| LRCH4        | ASC IgG        |       |              |              |    |
| 6.219513e-09 | -0.4118048     | 0.287 | 0.235        | 0.0001108877 | 11 |
| NIFK         | ASC IgG        |       |              |              |    |
| 6.450763e-09 | -0.4338587     | 0.376 | 0.278        | 0.0001150107 | 11 |
| HP1BP3       | ASC IgG        |       |              |              |    |
| 6.645494e-09 | -0.4311606     | 0.307 | 0.239        | 0.0001184825 | 11 |
| HLA-F        | ASC IgG        |       |              |              |    |

|              |            |       |       |              |    |
|--------------|------------|-------|-------|--------------|----|
| 6.753945e-09 | -0.3416684 | 0.221 | 0.181 | 0.0001204161 | 11 |
| SBN01        | ASC IgG    |       |       |              |    |
| 6.837192e-09 | -0.3666516 | 0.247 | 0.192 | 0.0001219003 | 11 |
| KRCC1        | ASC IgG    |       |       |              |    |
| 7.085848e-09 | -0.3089748 | 0.141 | 0.134 | 0.0001263336 | 11 |
| NDUFAF2      | ASC IgG    |       |       |              |    |
| 7.220454e-09 | -0.354238  | 0.235 | 0.192 | 0.0001287335 | 11 |
| DCAF7        | ASC IgG    |       |       |              |    |
| 7.355151e-09 | -0.3448642 | 0.232 | 0.196 | 0.0001311135 | 11 |
| SF3B4        | ASC IgG    |       |       |              |    |
| 7.543523e-09 | -0.3401346 | 0.154 | 0.142 | 0.0001344935 | 11 |
| NOP16        | ASC IgG    |       |       |              |    |
| 7.844561e-09 | -0.4976208 | 0.538 | 0.392 | 0.0001398607 | 11 |
| ATP5PD       | ASC IgG    |       |       |              |    |
| 7.943505e-09 | -0.4930669 | 0.504 | 0.384 | 0.0001416247 | 11 |
| EIF4H        | ASC IgG    |       |       |              |    |
| 8.140846e-09 | -0.3498318 | 0.241 | 0.203 | 0.0001451431 | 11 |
| PXK          | ASC IgG    |       |       |              |    |
| 8.463172e-09 | -0.3276046 | 0.199 | 0.157 | 0.0001508899 | 11 |
| ZNF638       | ASC IgG    |       |       |              |    |
| 8.671258e-09 | -0.4339467 | 0.614 | 0.451 | 0.0001545999 | 11 |
| CAPZA1       | ASC IgG    |       |       |              |    |
| 9.061795e-09 | -0.4699173 | 0.392 | 0.276 | 0.0001615627 | 11 |
| RNASET2      | ASC IgG    |       |       |              |    |
| 9.073607e-09 | -0.3160579 | 0.202 | 0.172 | 0.0001617733 | 11 |
| BCL7B        | ASC IgG    |       |       |              |    |
| 9.180144e-09 | -0.3324066 | 0.206 | 0.166 | 0.0001636728 | 11 |
| YAF2         | ASC IgG    |       |       |              |    |
| 9.333232e-09 | -0.4755796 | 0.458 | 0.35  | 0.0001664022 | 11 |
| PHB2         | ASC IgG    |       |       |              |    |
| 9.756137e-09 | -0.3642941 | 0.255 | 0.206 | 0.0001739422 | 11 |
| ITPA         | ASC IgG    |       |       |              |    |
| 1.008627e-08 | -0.4879948 | 0.698 | 0.497 | 0.000179828  | 11 |
| PSMB9        | ASC IgG    |       |       |              |    |
| 1.068721e-08 | -0.3132078 | 0.209 | 0.176 | 0.0001905422 | 11 |
| ZNRD1        | ASC IgG    |       |       |              |    |
| 1.087432e-08 | -0.4354017 | 0.466 | 0.331 | 0.0001938783 | 11 |
| FAM96A       | ASC IgG    |       |       |              |    |
| 1.108661e-08 | -0.4865132 | 0.507 | 0.376 | 0.0001976633 | 11 |
| RBM25        | ASC IgG    |       |       |              |    |
| 1.139081e-08 | -0.3916729 | 0.384 | 0.281 | 0.0002030868 | 11 |
| DPY30        | ASC IgG    |       |       |              |    |
| 1.229719e-08 | -0.4120519 | 0.329 | 0.244 | 0.0002192466 | 11 |
| PSMB8-AS1    | ASC IgG    |       |       |              |    |
| 1.236399e-08 | -0.332887  | 0.173 | 0.151 | 0.0002204376 | 11 |
| PPAN         | ASC IgG    |       |       |              |    |
| 1.355331e-08 | -0.4236781 | 0.285 | 0.232 | 0.0002416419 | 11 |
| CDK4         | ASC IgG    |       |       |              |    |
| 1.410737e-08 | -0.4956116 | 0.489 | 0.358 | 0.0002515203 | 11 |
| ANXA6        | ASC IgG    |       |       |              |    |

|              |                  |       |       |              |    |
|--------------|------------------|-------|-------|--------------|----|
| 1.432253e-08 | -0.5987533       | 0.684 | 0.53  | 0.0002553565 | 11 |
|              | ATP6V1F ASC IgG  |       |       |              |    |
| 1.51713e-08  | -0.4714343       | 0.331 | 0.24  | 0.0002704891 | 11 |
|              | KPNA2 ASC IgG    |       |       |              |    |
| 1.537573e-08 | -0.3101824       | 0.177 | 0.152 | 0.0002741339 | 11 |
|              | PGD ASC IgG      |       |       |              |    |
| 1.549875e-08 | -0.3812816       | 0.313 | 0.244 | 0.0002763272 | 11 |
|              | MRPL9 ASC IgG    |       |       |              |    |
| 1.769993e-08 | -0.4136474       | 0.355 | 0.273 | 0.000315572  | 11 |
|              | YY1 ASC IgG      |       |       |              |    |
| 1.863929e-08 | -0.3242936       | 0.252 | 0.203 | 0.00033232   | 11 |
|              | COPS4 ASC IgG    |       |       |              |    |
| 1.886747e-08 | -0.4271436       | 0.447 | 0.333 | 0.0003363881 | 11 |
|              | PPM1G ASC IgG    |       |       |              |    |
| 1.9439e-08   | -0.3553716       | 0.162 | 0.145 | 0.000346578  | 11 |
|              | SERPINB9 ASC IgG |       |       |              |    |
| 1.958667e-08 | -0.3894305       | 0.327 | 0.247 | 0.0003492108 | 11 |
|              | THOC2 ASC IgG    |       |       |              |    |
| 2.046423e-08 | -0.4102102       | 0.31  | 0.24  | 0.0003648568 | 11 |
|              | ABCF1 ASC IgG    |       |       |              |    |
| 2.169097e-08 | -0.3170618       | 0.176 | 0.155 | 0.0003867284 | 11 |
|              | PEX16 ASC IgG    |       |       |              |    |
| 2.216557e-08 | -0.3617299       | 0.194 | 0.154 | 0.00039519   | 11 |
|              | JUND ASC IgG     |       |       |              |    |
| 2.324378e-08 | -0.473696        | 0.477 | 0.358 | 0.0004144134 | 11 |
|              | UPF2 ASC IgG     |       |       |              |    |
| 2.350956e-08 | -0.4250601       | 0.339 | 0.257 | 0.0004191519 | 11 |
|              | C9orf78 ASC IgG  |       |       |              |    |
| 2.443956e-08 | -0.4563482       | 0.943 | 0.863 | 0.0004357329 | 11 |
|              | UBC ASC IgG      |       |       |              |    |
| 2.452325e-08 | -0.3762944       | 0.368 | 0.29  | 0.0004372251 | 11 |
|              | HSPA4 ASC IgG    |       |       |              |    |
| 2.654863e-08 | -0.3001456       | 0.232 | 0.18  | 0.0004733355 | 11 |
|              | PCGF5 ASC IgG    |       |       |              |    |
| 2.715404e-08 | -0.3137697       | 0.143 | 0.128 | 0.0004841294 | 11 |
|              | C19orf66 ASC IgG |       |       |              |    |
| 2.865546e-08 | -0.3347063       | 0.261 | 0.2   | 0.0005108982 | 11 |
|              | NUBP1 ASC IgG    |       |       |              |    |
| 2.878929e-08 | -0.3183316       | 0.194 | 0.161 | 0.0005132843 | 11 |
|              | PDCL3 ASC IgG    |       |       |              |    |
| 3.069429e-08 | -0.3563312       | 0.249 | 0.191 | 0.0005472486 | 11 |
|              | MAX ASC IgG      |       |       |              |    |
| 3.347575e-08 | -0.304416        | 0.194 | 0.16  | 0.0005968391 | 11 |
|              | NIPSNAP2 ASC IgG |       |       |              |    |
| 3.372454e-08 | -0.5391241       | 0.726 | 0.545 | 0.0006012749 | 11 |
|              | PSMA1 ASC IgG    |       |       |              |    |
| 3.395895e-08 | -0.3726456       | 0.264 | 0.209 | 0.0006054541 | 11 |
|              | DNTTIP2 ASC IgG  |       |       |              |    |
| 3.537583e-08 | -0.5910529       | 0.576 | 0.44  | 0.0006307158 | 11 |
|              | ANXA2 ASC IgG    |       |       |              |    |

|              |            |       |       |              |    |
|--------------|------------|-------|-------|--------------|----|
| 3.636008e-08 | -0.3173911 | 0.197 | 0.163 | 0.0006482639 | 11 |
| RDH14        | ASC IgG    |       |       |              |    |
| 4.221828e-08 | -0.3713889 | 0.287 | 0.218 | 0.0007527098 | 11 |
| BNIP2        | ASC IgG    |       |       |              |    |
| 4.508745e-08 | -0.3558289 | 0.246 | 0.19  | 0.0008038641 | 11 |
| USP15        | ASC IgG    |       |       |              |    |
| 4.62688e-08  | -0.3977535 | 0.346 | 0.263 | 0.0008249265 | 11 |
| PDCD2        | ASC IgG    |       |       |              |    |
| 5.438469e-08 | -0.4615939 | 0.444 | 0.353 | 0.0009696247 | 11 |
| SQLE         | ASC IgG    |       |       |              |    |
| 6.156381e-08 | -0.7168762 | 0.784 | 0.591 | 0.001097621  | 11 |
| LDHA         | ASC IgG    |       |       |              |    |
| 6.201376e-08 | -0.3832933 | 0.352 | 0.264 | 0.001105643  | 11 |
| PMF1         | ASC IgG    |       |       |              |    |
| 6.678197e-08 | -0.309727  | 0.215 | 0.183 | 0.001190656  | 11 |
| GNL1         | ASC IgG    |       |       |              |    |
| 6.911076e-08 | -0.301952  | 0.195 | 0.156 | 0.001232176  | 11 |
| ZNF148       | ASC IgG    |       |       |              |    |
| 7.22032e-08  | -0.4188967 | 0.329 | 0.252 | 0.001287311  | 11 |
| DTNBP1       | ASC IgG    |       |       |              |    |
| 7.355136e-08 | -0.4506698 | 0.396 | 0.31  | 0.001311347  | 11 |
| LPXN         | ASC IgG    |       |       |              |    |
| 9.15141e-08  | -0.4041195 | 0.418 | 0.304 | 0.001631605  | 11 |
| SHKBP1       | ASC IgG    |       |       |              |    |
| 9.353857e-08 | -0.352383  | 0.226 | 0.195 | 0.001667699  | 11 |
| MRPL1        | ASC IgG    |       |       |              |    |
| 1.032688e-07 | -0.3630425 | 0.306 | 0.231 | 0.001841179  | 11 |
| SMARCA5      | ASC IgG    |       |       |              |    |
| 1.082257e-07 | -0.3713309 | 0.311 | 0.232 | 0.001929555  | 11 |
| MRFAP1       | ASC IgG    |       |       |              |    |
| 1.086683e-07 | -0.4358532 | 0.306 | 0.204 | 0.001937448  | 11 |
| C16orf74     | ASC IgG    |       |       |              |    |
| 1.176571e-07 | -0.3868446 | 0.273 | 0.215 | 0.002097708  | 11 |
| FAM204A      | ASC IgG    |       |       |              |    |
| 1.20895e-07  | -0.3677632 | 0.394 | 0.299 | 0.002155436  | 11 |
| AHSA1        | ASC IgG    |       |       |              |    |
| 1.246921e-07 | -0.4122952 | 0.343 | 0.255 | 0.002223136  | 11 |
| MRPS26       | ASC IgG    |       |       |              |    |
| 1.278756e-07 | -0.3703073 | 0.325 | 0.255 | 0.002279895  | 11 |
| C1D          | ASC IgG    |       |       |              |    |
| 1.308358e-07 | -0.3367442 | 0.202 | 0.156 | 0.002332672  | 11 |
| SHISA5       | ASC IgG    |       |       |              |    |
| 1.319248e-07 | -0.3683242 | 0.245 | 0.193 | 0.002352088  | 11 |
| CHMP3        | ASC IgG    |       |       |              |    |
| 1.321906e-07 | -0.3019761 | 0.197 | 0.162 | 0.002356827  | 11 |
| BLOC1S4      | ASC IgG    |       |       |              |    |
| 1.391425e-07 | -0.4324385 | 0.438 | 0.317 | 0.002480771  | 11 |
| IGBP1        | ASC IgG    |       |       |              |    |
| 1.430203e-07 | -0.4456456 | 0.655 | 0.486 | 0.002549909  | 11 |
| SF3B6        | ASC IgG    |       |       |              |    |

|              |            |       |       |             |    |
|--------------|------------|-------|-------|-------------|----|
| 1.452675e-07 | -0.3788357 | 0.227 | 0.185 | 0.002589974 | 11 |
| WDR43        | ASC IgG    |       |       |             |    |
| 1.605644e-07 | -0.3090083 | 0.206 | 0.163 | 0.002862703 | 11 |
| PPP1R18      | ASC IgG    |       |       |             |    |
| 1.784629e-07 | -0.4696465 | 0.706 | 0.531 | 0.003181816 | 11 |
| CAP1         | ASC IgG    |       |       |             |    |
| 1.796417e-07 | -0.4980781 | 0.895 | 0.718 | 0.003202833 | 11 |
| COX6C        | ASC IgG    |       |       |             |    |
| 1.874157e-07 | -0.3002608 | 0.183 | 0.149 | 0.003341435 | 11 |
| NIPBL        | ASC IgG    |       |       |             |    |
| 1.912644e-07 | -0.4984632 | 0.616 | 0.439 | 0.003410053 | 11 |
| CCT7         | ASC IgG    |       |       |             |    |
| 2.172473e-07 | -0.3476727 | 0.276 | 0.205 | 0.003873302 | 11 |
| EBLN3P       | ASC IgG    |       |       |             |    |
| 2.193099e-07 | -0.4014267 | 0.411 | 0.302 | 0.003910077 | 11 |
| ELAVL1       | ASC IgG    |       |       |             |    |
| 2.278379e-07 | -0.5003699 | 0.67  | 0.492 | 0.004062123 | 11 |
| EIF4G2       | ASC IgG    |       |       |             |    |
| 2.286898e-07 | -0.3647071 | 0.298 | 0.235 | 0.00407731  | 11 |
| TPRKB        | ASC IgG    |       |       |             |    |
| 2.304384e-07 | -0.3421907 | 0.307 | 0.238 | 0.004108487 | 11 |
| CPSF6        | ASC IgG    |       |       |             |    |
| 2.397813e-07 | -0.4116988 | 0.373 | 0.278 | 0.00427506  | 11 |
| SMCHD1       | ASC IgG    |       |       |             |    |
| 2.444481e-07 | -0.3313767 | 0.241 | 0.191 | 0.004358265 | 11 |
| FYTTD1       | ASC IgG    |       |       |             |    |
| 2.46555e-07  | -0.6256496 | 0.679 | 0.492 | 0.004395829 | 11 |
| HSPE1        | ASC IgG    |       |       |             |    |
| 2.595398e-07 | -0.4837264 | 0.702 | 0.518 | 0.004627335 | 11 |
| TRAPPC1      | ASC IgG    |       |       |             |    |
| 2.734849e-07 | -0.4574776 | 0.532 | 0.387 | 0.004875962 | 11 |
| LAMTOR4      | ASC IgG    |       |       |             |    |
| 2.752273e-07 | -0.3138048 | 0.253 | 0.192 | 0.004907028 | 11 |
| UBE2E3       | ASC IgG    |       |       |             |    |
| 2.798808e-07 | -0.3066543 | 0.203 | 0.156 | 0.004989994 | 11 |
| NSUN5        | ASC IgG    |       |       |             |    |
| 2.94072e-07  | -0.308149  | 0.184 | 0.144 | 0.00524301  | 11 |
| PHF3         | ASC IgG    |       |       |             |    |
| 2.972456e-07 | -0.3501528 | 0.265 | 0.204 | 0.005299592 | 11 |
| ARL2BP       | ASC IgG    |       |       |             |    |
| 3.069991e-07 | -0.3882891 | 0.432 | 0.322 | 0.005473487 | 11 |
| SNRNP70      | ASC IgG    |       |       |             |    |
| 3.246115e-07 | -0.3711413 | 0.294 | 0.224 | 0.005787498 | 11 |
| METTL26      | ASC IgG    |       |       |             |    |
| 3.42605e-07  | -0.3969455 | 0.296 | 0.222 | 0.006108304 | 11 |
| MAGED2       | ASC IgG    |       |       |             |    |
| 3.437055e-07 | -0.3437985 | 0.207 | 0.168 | 0.006127925 | 11 |
| CYSTM1       | ASC IgG    |       |       |             |    |
| 3.504837e-07 | -0.4277397 | 0.458 | 0.346 | 0.006248773 | 11 |
| FKBP8        | ASC IgG    |       |       |             |    |



|              |            |       |       |             |    |
|--------------|------------|-------|-------|-------------|----|
| 3.708384e-07 | -0.3404816 | 0.198 | 0.157 | 0.006611679 | 11 |
| TPP1         | ASC IgG    |       |       |             |    |
| 3.82856e-07  | -0.3223252 | 0.2   | 0.161 | 0.006825939 | 11 |
| FNIP1        | ASC IgG    |       |       |             |    |
| 4.184727e-07 | -0.3753077 | 0.29  | 0.223 | 0.007460949 | 11 |
| RPF1         | ASC IgG    |       |       |             |    |
| 4.364511e-07 | -0.6150084 | 0.625 | 0.457 | 0.007781486 | 11 |
| HSPD1        | ASC IgG    |       |       |             |    |
| 4.381465e-07 | -0.3026593 | 0.204 | 0.157 | 0.007811714 | 11 |
| OSER1        | ASC IgG    |       |       |             |    |
| 4.404228e-07 | -0.4212399 | 0.436 | 0.303 | 0.007852299 | 11 |
| CWC15        | ASC IgG    |       |       |             |    |
| 5.23862e-07  | -0.4004145 | 0.279 | 0.203 | 0.009339935 | 11 |
| RALGPS2      | ASC IgG    |       |       |             |    |
| 5.246876e-07 | -0.3291027 | 0.271 | 0.205 | 0.009354655 | 11 |
| HADHB        | ASC IgG    |       |       |             |    |
| 5.587812e-07 | -0.3031945 | 0.213 | 0.164 | 0.00996251  | 11 |
| KATNBL1      | ASC IgG    |       |       |             |    |
| 5.648859e-07 | -0.3278102 | 0.201 | 0.165 | 0.01007135  | 11 |
| C8orf33      | ASC IgG    |       |       |             |    |
| 5.913021e-07 | -0.4547543 | 0.763 | 0.58  | 0.01054233  | 11 |
| NDUFV2       | ASC IgG    |       |       |             |    |
| 6.174241e-07 | -0.5011895 | 0.82  | 0.635 | 0.01100805  | 11 |
| ATP5MF       | ASC IgG    |       |       |             |    |
| 6.266021e-07 | -0.4405319 | 0.523 | 0.388 | 0.01117169  | 11 |
| MAF1         | ASC IgG    |       |       |             |    |
| 6.374609e-07 | -0.4209723 | 0.337 | 0.24  | 0.01136529  | 11 |
| SLBP         | ASC IgG    |       |       |             |    |
| 6.6062e-07   | -0.4806327 | 0.614 | 0.446 | 0.01177819  | 11 |
| NDUFB9       | ASC IgG    |       |       |             |    |
| 6.706835e-07 | -0.4190141 | 0.439 | 0.321 | 0.01195762  | 11 |
| PUF60        | ASC IgG    |       |       |             |    |
| 7.120354e-07 | -0.3354596 | 0.325 | 0.237 | 0.01269488  | 11 |
| PTRHD1       | ASC IgG    |       |       |             |    |
| 7.839866e-07 | -0.464103  | 0.497 | 0.371 | 0.0139777   | 11 |
| UBE2B        | ASC IgG    |       |       |             |    |
| 8.220569e-07 | -0.4363819 | 0.509 | 0.36  | 0.01465645  | 11 |
| PPP2CA       | ASC IgG    |       |       |             |    |
| 8.243638e-07 | -0.3571826 | 0.309 | 0.235 | 0.01469758  | 11 |
| STIP1        | ASC IgG    |       |       |             |    |
| 8.441365e-07 | -0.3557197 | 0.332 | 0.245 | 0.01505011  | 11 |
| SNRPA1       | ASC IgG    |       |       |             |    |
| 8.694329e-07 | -0.300956  | 0.22  | 0.174 | 0.01550112  | 11 |
| CDC5L        | ASC IgG    |       |       |             |    |
| 8.707535e-07 | -0.4212316 | 0.424 | 0.313 | 0.01552466  | 11 |
| TCP1         | ASC IgG    |       |       |             |    |
| 8.769168e-07 | -0.4057318 | 0.344 | 0.246 | 0.01563455  | 11 |
| BBX          | ASC IgG    |       |       |             |    |
| 9.07035e-07  | -0.3592842 | 0.308 | 0.23  | 0.01617153  | 11 |
| PIN4         | ASC IgG    |       |       |             |    |

|              |            |       |       |            |    |
|--------------|------------|-------|-------|------------|----|
| 9.118953e-07 | -0.3802872 | 0.667 | 0.519 | 0.01625818 | 11 |
| FKBP1A       | ASC IgG    |       |       |            |    |
| 9.120391e-07 | -0.3721536 | 0.271 | 0.197 | 0.01626075 | 11 |
| CLK1         | ASC IgG    |       |       |            |    |
| 9.141401e-07 | -0.4954081 | 0.603 | 0.439 | 0.0162982  | 11 |
| RAD23A       | ASC IgG    |       |       |            |    |
| 1.028964e-06 | -0.3034365 | 0.198 | 0.162 | 0.0183454  | 11 |
| KAT5         | ASC IgG    |       |       |            |    |
| 1.037543e-06 | -0.4441944 | 0.515 | 0.377 | 0.01849836 | 11 |
| ANXA7        | ASC IgG    |       |       |            |    |
| 1.053211e-06 | -0.508226  | 0.708 | 0.51  | 0.0187777  | 11 |
| VAMP2        | ASC IgG    |       |       |            |    |
| 1.191759e-06 | -0.3275465 | 0.278 | 0.205 | 0.02124788 | 11 |
| ARHGEF1      | ASC IgG    |       |       |            |    |
| 1.224949e-06 | -0.372021  | 0.316 | 0.236 | 0.02183962 | 11 |
| HNRNPAB      | ASC IgG    |       |       |            |    |
| 1.428291e-06 | -0.409103  | 0.346 | 0.234 | 0.025465   | 11 |
| GCHFR        | ASC IgG    |       |       |            |    |
| 1.498872e-06 | -0.4668041 | 0.65  | 0.471 | 0.02672338 | 11 |
| VAPA         | ASC IgG    |       |       |            |    |
| 1.593807e-06 | -0.3286897 | 0.295 | 0.225 | 0.02841598 | 11 |
| PLEKHJ1      | ASC IgG    |       |       |            |    |
| 1.668862e-06 | -0.4393017 | 0.388 | 0.282 | 0.02975414 | 11 |
| CNPY3        | ASC IgG    |       |       |            |    |
| 1.770516e-06 | -0.4225055 | 0.439 | 0.323 | 0.03156652 | 11 |
| MRPS36       | ASC IgG    |       |       |            |    |
| 1.843383e-06 | -0.4373225 | 0.53  | 0.373 | 0.03286568 | 11 |
| SUPT4H1      | ASC IgG    |       |       |            |    |
| 1.855982e-06 | -0.318782  | 0.294 | 0.211 | 0.0330903  | 11 |
| RAMMET       | ASC IgG    |       |       |            |    |
| 1.977582e-06 | -0.4184168 | 0.448 | 0.333 | 0.03525831 | 11 |
| SEPHS2       | ASC IgG    |       |       |            |    |
| 2.069629e-06 | -0.3484405 | 0.276 | 0.216 | 0.03689942 | 11 |
| WDR46        | ASC IgG    |       |       |            |    |
| 2.153007e-06 | -0.339679  | 0.247 | 0.195 | 0.03838596 | 11 |
| GTPBP4       | ASC IgG    |       |       |            |    |
| 2.45312e-06  | -0.4305672 | 0.443 | 0.319 | 0.04373667 | 11 |
| NMT1         | ASC IgG    |       |       |            |    |
| 2.612313e-06 | -0.4246966 | 0.466 | 0.336 | 0.04657492 | 11 |
| STRAP        | ASC IgG    |       |       |            |    |
| 2.619144e-06 | -0.3159776 | 0.253 | 0.186 | 0.04669672 | 11 |
| NCKAP1L      | ASC IgG    |       |       |            |    |
| 2.680132e-06 | -0.4051209 | 0.455 | 0.322 | 0.04778408 | 11 |
| RAB5C        | ASC IgG    |       |       |            |    |
| 2.740698e-06 | -0.3204558 | 0.247 | 0.19  | 0.0488639  | 11 |
| CSNK2A1      | ASC IgG    |       |       |            |    |
| 2.84207e-06  | -0.4304852 | 0.514 | 0.38  | 0.05067126 | 11 |
| CHMP4A       | ASC IgG    |       |       |            |    |
| 2.966947e-06 | -0.4249091 | 0.473 | 0.337 | 0.05289769 | 11 |
| MED10        | ASC IgG    |       |       |            |    |

|              |            |       |       |            |    |
|--------------|------------|-------|-------|------------|----|
| 3.241131e-06 | -0.4167572 | 0.835 | 0.71  | 0.05778613 | 11 |
| CLIC1        | ASC IgG    |       |       |            |    |
| 3.582038e-06 | -0.3609773 | 0.304 | 0.205 | 0.06386415 | 11 |
| CCDC32       | ASC IgG    |       |       |            |    |
| 3.771998e-06 | -0.3625476 | 0.305 | 0.218 | 0.06725096 | 11 |
| NEMF         | ASC IgG    |       |       |            |    |
| 3.930092e-06 | -0.3678927 | 0.302 | 0.228 | 0.0700696  | 11 |
| CCDC85B      | ASC IgG    |       |       |            |    |
| 4.036519e-06 | -0.4343517 | 0.408 | 0.309 | 0.07196711 | 11 |
| MZT2A        | ASC IgG    |       |       |            |    |
| 4.200961e-06 | -0.4004833 | 0.361 | 0.265 | 0.07489893 | 11 |
| CEBPZ        | ASC IgG    |       |       |            |    |
| 4.372488e-06 | -0.3233833 | 0.273 | 0.202 | 0.07795709 | 11 |
| FAAP20       | ASC IgG    |       |       |            |    |
| 4.717351e-06 | -0.3010978 | 0.298 | 0.222 | 0.08410566 | 11 |
| DAZAP1       | ASC IgG    |       |       |            |    |
| 4.870813e-06 | -0.4041821 | 0.505 | 0.363 | 0.08684172 | 11 |
| EWSR1        | ASC IgG    |       |       |            |    |
| 4.899689e-06 | -0.3992243 | 0.388 | 0.278 | 0.08735656 | 11 |
| JPT1         | ASC IgG    |       |       |            |    |
| 5.67288e-06  | -0.3430067 | 0.358 | 0.26  | 0.1011418  | 11 |
| THOC7        | ASC IgG    |       |       |            |    |
| 6.206518e-06 | -0.408342  | 0.461 | 0.325 | 0.110656   | 11 |
| RFTN1        | ASC IgG    |       |       |            |    |
| 6.30156e-06  | -0.339822  | 0.351 | 0.265 | 0.1123505  | 11 |
| FIBP         | ASC IgG    |       |       |            |    |
| 6.535473e-06 | -0.3450264 | 0.325 | 0.233 | 0.1165209  | 11 |
| ABT1         | ASC IgG    |       |       |            |    |
| 7.175566e-06 | -0.3959631 | 0.441 | 0.315 | 0.1279332  | 11 |
| GTF3C6       | ASC IgG    |       |       |            |    |
| 7.291899e-06 | -0.4210523 | 0.485 | 0.339 | 0.1300073  | 11 |
| MRPS18C      | ASC IgG    |       |       |            |    |
| 7.399008e-06 | -0.4205603 | 0.174 | 0.124 | 0.1319169  | 11 |
| LGALS3       | ASC IgG    |       |       |            |    |
| 7.472752e-06 | -0.317041  | 0.224 | 0.177 | 0.1332317  | 11 |
| ABCE1        | ASC IgG    |       |       |            |    |
| 7.963676e-06 | -0.3355141 | 0.282 | 0.219 | 0.1419844  | 11 |
| RNF187       | ASC IgG    |       |       |            |    |
| 8.027388e-06 | -0.3407956 | 0.27  | 0.197 | 0.1431203  | 11 |
| FNBP4        | ASC IgG    |       |       |            |    |
| 8.407777e-06 | -0.4172043 | 0.464 | 0.328 | 0.1499023  | 11 |
| PSMC6        | ASC IgG    |       |       |            |    |
| 8.787686e-06 | -0.4107479 | 0.301 | 0.23  | 0.1566756  | 11 |
| TARS         | ASC IgG    |       |       |            |    |
| 8.874256e-06 | -0.4901485 | 0.795 | 0.595 | 0.1582191  | 11 |
| PSMA2        | ASC IgG    |       |       |            |    |
| 9.159659e-06 | -0.3794167 | 0.397 | 0.275 | 0.1633076  | 11 |
| CNIH1        | ASC IgG    |       |       |            |    |
| 9.204219e-06 | -0.3924909 | 0.458 | 0.318 | 0.164102   | 11 |
| GNB2         | ASC IgG    |       |       |            |    |

|              |            |       |       |           |    |
|--------------|------------|-------|-------|-----------|----|
| 9.368192e-06 | -0.4573338 | 0.75  | 0.549 | 0.1670255 | 11 |
| NEDD8        | ASC IgG    |       |       |           |    |
| 9.746765e-06 | -0.3438213 | 0.316 | 0.227 | 0.1737751 | 11 |
| BTF3L4       | ASC IgG    |       |       |           |    |
| 9.937505e-06 | -0.4750963 | 0.379 | 0.234 | 0.1771758 | 11 |
| CD55         | ASC IgG    |       |       |           |    |
| 9.994513e-06 | -0.3122229 | 0.261 | 0.191 | 0.1781922 | 11 |
| TRMT10C      | ASC IgG    |       |       |           |    |
| 1.138791e-05 | -0.3616074 | 0.315 | 0.231 | 0.2030351 | 11 |
| RALA         | ASC IgG    |       |       |           |    |
| 1.140842e-05 | -0.3126596 | 0.236 | 0.173 | 0.2034008 | 11 |
| CRBN         | ASC IgG    |       |       |           |    |
| 1.14523e-05  | -0.3075454 | 0.286 | 0.215 | 0.204183  | 11 |
| SMAP2        | ASC IgG    |       |       |           |    |
| 1.168746e-05 | -0.3127512 | 0.288 | 0.22  | 0.2083757 | 11 |
| MRPL4        | ASC IgG    |       |       |           |    |
| 1.267276e-05 | -0.3312897 | 0.305 | 0.219 | 0.2259426 | 11 |
| CAPN1        | ASC IgG    |       |       |           |    |
| 1.333923e-05 | -0.4726515 | 0.823 | 0.631 | 0.2378252 | 11 |
| SET          | ASC IgG    |       |       |           |    |
| 1.402981e-05 | -0.3850799 | 0.501 | 0.362 | 0.2501375 | 11 |
| POLR2E       | ASC IgG    |       |       |           |    |
| 1.642887e-05 | -0.3104252 | 0.256 | 0.201 | 0.2929104 | 11 |
| MAP2K3       | ASC IgG    |       |       |           |    |
| 1.64334e-05  | -0.3548147 | 0.335 | 0.245 | 0.2929912 | 11 |
| RPL7L1       | ASC IgG    |       |       |           |    |
| 1.662567e-05 | -0.3853007 | 0.321 | 0.249 | 0.2964191 | 11 |
| GARS         | ASC IgG    |       |       |           |    |
| 1.790545e-05 | -0.4222259 | 0.668 | 0.486 | 0.3192363 | 11 |
| RAC2         | ASC IgG    |       |       |           |    |
| 1.877705e-05 | -0.3069188 | 0.337 | 0.246 | 0.3347761 | 11 |
| MRPL13       | ASC IgG    |       |       |           |    |
| 1.887203e-05 | -0.338335  | 0.321 | 0.24  | 0.3364694 | 11 |
| CEP57        | ASC IgG    |       |       |           |    |
| 1.943606e-05 | -0.3082252 | 0.306 | 0.219 | 0.3465255 | 11 |
| MPLKIP       | ASC IgG    |       |       |           |    |
| 1.952573e-05 | -0.4042821 | 0.303 | 0.243 | 0.3481242 | 11 |
| GST01        | ASC IgG    |       |       |           |    |
| 1.987445e-05 | -0.3258774 | 0.343 | 0.248 | 0.3543416 | 11 |
| MRPL28       | ASC IgG    |       |       |           |    |
| 2.080821e-05 | -0.323595  | 0.208 | 0.169 | 0.3709895 | 11 |
| DDIT3        | ASC IgG    |       |       |           |    |
| 2.208728e-05 | -0.3120127 | 0.242 | 0.183 | 0.3937941 | 11 |
| SCNM1        | ASC IgG    |       |       |           |    |
| 2.283551e-05 | -0.4045555 | 0.356 | 0.241 | 0.4071343 | 11 |
| GCC2         | ASC IgG    |       |       |           |    |
| 2.314625e-05 | -0.3039807 | 0.268 | 0.193 | 0.4126745 | 11 |
| FIP1L1       | ASC IgG    |       |       |           |    |
| 2.37631e-05  | -0.4103031 | 0.337 | 0.253 | 0.4236723 | 11 |
| NARS         | ASC IgG    |       |       |           |    |

|              |            |       |       |           |    |     |
|--------------|------------|-------|-------|-----------|----|-----|
| 2.455483e-05 | -0.3264486 | 0.233 | 0.166 | 0.437788  | 11 |     |
| BNIP3L       | ASC IgG    |       |       |           |    |     |
| 2.489089e-05 | -0.3989122 | 0.459 | 0.316 | 0.4437797 |    | 11  |
| PRPF40A      | ASC IgG    |       |       |           |    |     |
| 2.968275e-05 | -0.4508875 | 0.595 | 0.421 | 0.5292137 |    | 11  |
| TAF7         | ASC IgG    |       |       |           |    |     |
| 3.321549e-05 | -0.3698116 | 0.435 | 0.31  | 0.592199  |    | 11  |
| ZNF207       | ASC IgG    |       |       |           |    |     |
| 3.56286e-05  | -0.4069641 | 0.471 | 0.349 | 0.6352223 |    | 11  |
| CHMP4B       | ASC IgG    |       |       |           |    |     |
| 4.222527e-05 | -0.3772683 | 0.464 | 0.325 | 0.7528343 |    | 11  |
| PPP2R1A      | ASC IgG    |       |       |           |    |     |
| 5.086017e-05 | -0.3261338 | 0.26  | 0.199 | 0.9067859 |    | 11  |
| SRSF6        | ASC IgG    |       |       |           |    |     |
| 5.129072e-05 | -0.4656984 | 0.686 | 0.499 | 0.9144622 |    | 11  |
| EIF3I        | ASC IgG    |       |       |           |    |     |
| 5.183867e-05 | -0.4695519 | 0.508 | 0.357 | 0.9242317 |    | 11  |
| HSPA9        | ASC IgG    |       |       |           |    |     |
| 5.410635e-05 | -0.3328001 | 0.295 | 0.206 | 0.9646621 |    | 11  |
| MIS18BP1     | ASC IgG    |       |       |           |    |     |
| 5.523641e-05 | -0.3123601 | 0.291 | 0.212 | 0.98481   |    | 11  |
| TIAL1        | ASC IgG    |       |       |           |    |     |
| 5.569204e-05 | -0.3118619 | 0.276 | 0.2   | 0.9929334 |    | 11  |
| NGDN         | ASC IgG    |       |       |           |    |     |
| 6.0695e-05   | -0.3041584 | 0.279 | 0.199 | 1         |    | 11  |
| ZC3H13       | ASC IgG    |       |       |           |    |     |
| 6.115913e-05 | -0.3153287 | 0.337 | 0.244 | 1         |    | 11  |
| PRPF31       | ASC IgG    |       |       |           |    |     |
| 6.554781e-05 | -0.3645772 | 0.391 | 0.277 | 1         |    | 11  |
| DCTN2        | ASC IgG    |       |       |           |    |     |
| 6.63391e-05  | -0.3657405 | 0.957 | 0.858 | 1         |    | 11  |
| ASC IgG      |            |       |       |           |    | UBB |
| 7.209862e-05 | 0.3941009  | 0.941 | 0.748 | 1         |    | 11  |
| HLA-DRB1     | ASC IgG    |       |       |           |    |     |
| 8.899774e-05 | -0.4195857 | 0.497 | 0.354 | 1         |    | 11  |
| C8orf59      | ASC IgG    |       |       |           |    |     |
| 8.918825e-05 | -0.4045146 | 0.405 | 0.285 | 1         |    | 11  |
| AIMP1        | ASC IgG    |       |       |           |    |     |
| 9.663501e-05 | -0.3789972 | 0.326 | 0.226 | 1         |    | 11  |
| NT5C3A       | ASC IgG    |       |       |           |    |     |
| 0.0001019884 | -0.3816514 | 0.27  | 0.216 | 1         |    | 11  |
| EIF4EBP1     | ASC IgG    |       |       |           |    |     |
| 0.0001067095 | -0.3607597 | 0.839 | 0.671 | 1         |    | 11  |
| ATP6V1G1     | ASC IgG    |       |       |           |    |     |
| 0.0001174777 | -0.3675296 | 0.273 | 0.188 | 1         |    | 11  |
| RNF145       | ASC IgG    |       |       |           |    |     |
| 0.0001237901 | -0.3081236 | 0.306 | 0.21  | 1         |    | 11  |
| WIPI2        | ASC IgG    |       |       |           |    |     |
| 0.0001239736 | -0.3951091 | 0.514 | 0.358 | 1         |    | 11  |
| DNAJC7       | ASC IgG    |       |       |           |    |     |

|              |         |            |       |       |   |    |
|--------------|---------|------------|-------|-------|---|----|
| 0.000127333  |         | -0.3475134 | 0.349 | 0.245 | 1 | 11 |
| PRPF4B       | ASC IgG |            |       |       |   |    |
| 0.0001342094 |         | -0.3676495 | 0.363 | 0.249 | 1 | 11 |
| NFE2L2       | ASC IgG |            |       |       |   |    |
| 0.0001347543 |         | -0.3052328 | 0.337 | 0.247 | 1 | 11 |
| SHOC2        | ASC IgG |            |       |       |   |    |
| 0.0001368234 |         | -0.3909781 | 0.405 | 0.27  | 1 | 11 |
| RSRP1        | ASC IgG |            |       |       |   |    |
| 0.0001448731 |         | -0.4198685 | 0.547 | 0.398 | 1 | 11 |
| PSMC5        | ASC IgG |            |       |       |   |    |
| 0.0001450308 |         | -0.3195435 | 0.331 | 0.235 | 1 | 11 |
| METTL9       | ASC IgG |            |       |       |   |    |
| 0.0001480963 |         | -0.3042312 | 0.203 | 0.132 | 1 | 11 |
| NEIL1        | ASC IgG |            |       |       |   |    |
| 0.0001619348 |         | -0.3262923 | 0.315 | 0.223 | 1 | 11 |
| FAM32A       | ASC IgG |            |       |       |   |    |
| 0.0001806472 |         | -0.4820945 | 0.794 | 0.573 | 1 | 11 |
| LDHB         | ASC IgG |            |       |       |   |    |
| 0.0001840693 |         | -0.3691517 | 0.345 | 0.242 | 1 | 11 |
| LAMP1        | ASC IgG |            |       |       |   |    |
| 0.0001860466 |         | -0.3163166 | 0.239 | 0.166 | 1 | 11 |
| SAMSN1       | ASC IgG |            |       |       |   |    |
| 0.0001924566 |         | -0.3925394 | 0.488 | 0.324 | 1 | 11 |
| CCNDBP1      | ASC IgG |            |       |       |   |    |
| 0.0001933051 |         | -0.3115026 | 0.287 | 0.201 | 1 | 11 |
| SLU7         | ASC IgG |            |       |       |   |    |
| 0.0002082649 |         | -0.3351485 | 0.447 | 0.302 | 1 | 11 |
| OCIAD2       | ASC IgG |            |       |       |   |    |
| 0.0002129668 |         | -0.3187408 | 0.243 | 0.161 | 1 | 11 |
| TNFRSF14     | ASC IgG |            |       |       |   |    |
| 0.0002211777 |         | -0.4130701 | 0.618 | 0.424 | 1 | 11 |
| KTN1         | ASC IgG |            |       |       |   |    |
| 0.0002314185 |         | -0.304553  | 0.265 | 0.182 | 1 | 11 |
| CSNK1D       | ASC IgG |            |       |       |   |    |
| 0.0002385756 |         | -0.326705  | 0.329 | 0.237 | 1 | 11 |
| MRPL15       | ASC IgG |            |       |       |   |    |
| 0.0002430947 |         | -0.3322763 | 0.332 | 0.231 | 1 | 11 |
| CNDP2        | ASC IgG |            |       |       |   |    |
| 0.0002478714 |         | -0.4133349 | 0.603 | 0.414 | 1 | 11 |
| HNRNPD       | ASC IgG |            |       |       |   |    |
| 0.0002515677 |         | -0.4721302 | 0.789 | 0.567 | 1 | 11 |
| PARK7        | ASC IgG |            |       |       |   |    |
| 0.0002575692 |         | -0.3302221 | 0.306 | 0.209 | 1 | 11 |
| TINF2        | ASC IgG |            |       |       |   |    |
| 0.0002594575 |         | -0.4057312 | 0.501 | 0.348 | 1 | 11 |
| NDUFA5       | ASC IgG |            |       |       |   |    |
| 0.0002930249 |         | -0.378229  | 0.389 | 0.283 | 1 | 11 |
| ERG28        | ASC IgG |            |       |       |   |    |
| 0.000312642  |         | -0.3663058 | 0.523 | 0.349 | 1 | 11 |
| DGUOK        | ASC IgG |            |       |       |   |    |

|                  |            |       |       |   |    |     |
|------------------|------------|-------|-------|---|----|-----|
| 0.0003690318     | -0.3608318 | 0.361 | 0.252 | 1 | 11 |     |
| M6PR ASC IgG     |            |       |       |   |    |     |
| 0.0003735576     | -0.3227447 | 0.382 | 0.262 | 1 | 11 | AIP |
| ASC IgG          |            |       |       |   |    |     |
| 0.0003793986     | -0.3348579 | 0.36  | 0.247 | 1 | 11 |     |
| CHTOP ASC IgG    |            |       |       |   |    |     |
| 0.0004304966     | -0.3130142 | 0.31  | 0.229 | 1 | 11 |     |
| TLN1 ASC IgG     |            |       |       |   |    |     |
| 0.0004323736     | -0.3282027 | 0.313 | 0.213 | 1 | 11 |     |
| VPS51 ASC IgG    |            |       |       |   |    |     |
| 0.0004675382     | -0.4004871 | 0.622 | 0.429 | 1 | 11 |     |
| LSM3 ASC IgG     |            |       |       |   |    |     |
| 0.0004730601     | -0.4567006 | 0.804 | 0.599 | 1 | 11 |     |
| NOP10 ASC IgG    |            |       |       |   |    |     |
| 0.0005046662     | -0.4591343 | 0.542 | 0.379 | 1 | 11 |     |
| C19orf70 ASC IgG |            |       |       |   |    |     |
| 0.0005262116     | -0.3937045 | 0.295 | 0.206 | 1 | 11 |     |
| PIM3 ASC IgG     |            |       |       |   |    |     |
| 0.0005311124     | -0.3043195 | 0.862 | 0.674 | 1 | 11 |     |
| HLA-DMA ASC IgG  |            |       |       |   |    |     |
| 0.0005358706     | -0.3343244 | 0.504 | 0.351 | 1 | 11 |     |
| CD19 ASC IgG     |            |       |       |   |    |     |
| 0.0005752778     | -0.4201832 | 0.513 | 0.368 | 1 | 11 | DDT |
| ASC IgG          |            |       |       |   |    |     |
| 0.0006188199     | -0.3560312 | 0.326 | 0.232 | 1 | 11 |     |
| EIF4A1 ASC IgG   |            |       |       |   |    |     |
| 0.0006380707     | -0.3521295 | 0.407 | 0.284 | 1 | 11 |     |
| PFDN6 ASC IgG    |            |       |       |   |    |     |
| 0.0006408443     | -0.3973533 | 0.504 | 0.345 | 1 | 11 |     |
| DDX17 ASC IgG    |            |       |       |   |    |     |
| 0.0006959882     | -0.3331917 | 0.35  | 0.247 | 1 | 11 |     |
| MRPL42 ASC IgG   |            |       |       |   |    |     |
| 0.0007014685     | -0.3106042 | 0.323 | 0.208 | 1 | 11 |     |
| ASH1L ASC IgG    |            |       |       |   |    |     |
| 0.0007787505     | -0.3102617 | 0.595 | 0.391 | 1 | 11 |     |
| CSTB ASC IgG     |            |       |       |   |    |     |
| 0.0007951384     | -0.3716209 | 0.425 | 0.282 | 1 | 11 |     |
| ATF6B ASC IgG    |            |       |       |   |    |     |
| 0.0008355016     | -0.3289452 | 0.394 | 0.285 | 1 | 11 |     |
| TXN2 ASC IgG     |            |       |       |   |    |     |
| 0.000846841      | -0.4054691 | 0.638 | 0.443 | 1 | 11 |     |
| CSNK2B ASC IgG   |            |       |       |   |    |     |
| 0.000940515      | -0.5078351 | 0.776 | 0.58  | 1 | 11 |     |
| EIF2S2 ASC IgG   |            |       |       |   |    |     |
| 0.0009744697     | -0.3761075 | 0.534 | 0.382 | 1 | 11 |     |
| VPS28 ASC IgG    |            |       |       |   |    |     |
| 0.001023419      | -0.4188466 | 0.458 | 0.324 | 1 | 11 |     |
| FRG1 ASC IgG     |            |       |       |   |    |     |
| 0.001066763      | -0.3405968 | 0.481 | 0.298 | 1 | 11 |     |
| BCL7A ASC IgG    |            |       |       |   |    |     |

|             |         |            |       |       |   |    |
|-------------|---------|------------|-------|-------|---|----|
| 0.001071586 |         | -0.4035532 | 0.664 | 0.472 | 1 | 11 |
| GRB2        | ASC IgG |            |       |       |   |    |
| 0.0011319   |         | -0.3513912 | 0.266 | 0.172 | 1 | 11 |
| ASAH1       | ASC IgG |            |       |       |   |    |
| 0.001225035 |         | -0.4467435 | 0.633 | 0.45  | 1 | 11 |
| DDX18       | ASC IgG |            |       |       |   |    |
| 0.001226664 |         | -0.4001857 | 0.433 | 0.298 | 1 | 11 |
| ATP1B3      | ASC IgG |            |       |       |   |    |
| 0.00122964  |         | -0.3007771 | 0.338 | 0.239 | 1 | 11 |
| PPP1CB      | ASC IgG |            |       |       |   |    |
| 0.001234929 |         | -0.331334  | 0.341 | 0.237 | 1 | 11 |
| ANKRD11     | ASC IgG |            |       |       |   |    |
| 0.001236306 |         | -0.3978862 | 0.588 | 0.413 | 1 | 11 |
| COX7A2L     | ASC IgG |            |       |       |   |    |
| 0.001248031 |         | -0.3416547 | 0.39  | 0.256 | 1 | 11 |
| HNRNPH2     | ASC IgG |            |       |       |   |    |
| 0.001381276 |         | -0.4397993 | 0.542 | 0.387 | 1 | 11 |
| ARPC5L      | ASC IgG |            |       |       |   |    |
| 0.001437684 |         | -0.3021651 | 0.22  | 0.155 | 1 | 11 |
| NOLC1       | ASC IgG |            |       |       |   |    |
| 0.001517665 |         | -0.317024  | 0.443 | 0.306 | 1 | 11 |
| SF3B1       | ASC IgG |            |       |       |   |    |
| 0.00167182  |         | -0.3665699 | 0.567 | 0.378 | 1 | 11 |
| SMARCB1     | ASC IgG |            |       |       |   |    |
| 0.002514058 |         | -0.3236881 | 0.449 | 0.305 | 1 | 11 |
| CALM3       | ASC IgG |            |       |       |   |    |
| 0.002592761 |         | -0.3522346 | 0.514 | 0.356 | 1 | 11 |
| SDHC        | ASC IgG |            |       |       |   |    |
| 0.002597202 |         | -0.315314  | 0.333 | 0.226 | 1 | 11 |
| DEGS1       | ASC IgG |            |       |       |   |    |
| 0.003026232 |         | -1.001076  | 0.616 | 0.417 | 1 | 11 |
| HIST1H4C    | ASC IgG |            |       |       |   |    |
| 0.003080076 |         | -0.4265649 | 0.78  | 0.578 | 1 | 11 |
| NDUFB2      | ASC IgG |            |       |       |   |    |
| 0.003080471 |         | -0.3441893 | 0.513 | 0.351 | 1 | 11 |
| AP2S1       | ASC IgG |            |       |       |   |    |
| 0.003144567 |         | -0.3661674 | 0.505 | 0.339 | 1 | 11 |
| PRPF38B     | ASC IgG |            |       |       |   |    |
| 0.003807589 |         | -0.328187  | 0.365 | 0.227 | 1 | 11 |
| CIR1        | ASC IgG |            |       |       |   |    |
| 0.004030879 |         | -0.4176974 | 0.816 | 0.621 | 1 | 11 |
| ATP6V0E1    | ASC IgG |            |       |       |   |    |
| 0.004267489 |         | -0.3341094 | 0.366 | 0.267 | 1 | 11 |
| TIMM10      | ASC IgG |            |       |       |   |    |
| 0.00431049  |         | -0.4165082 | 0.637 | 0.44  | 1 | 11 |
| PGAM1       | ASC IgG |            |       |       |   |    |
| 0.004927038 |         | -0.3354108 | 0.417 | 0.287 | 1 | 11 |
| RAD23B      | ASC IgG |            |       |       |   |    |
| 0.005657204 |         | -0.3549113 | 0.518 | 0.353 | 1 | 11 |
| SSNA1       | ASC IgG |            |       |       |   |    |



|                 |            |       |       |       |    |           |       |    |
|-----------------|------------|-------|-------|-------|----|-----------|-------|----|
| 0.005804675     | -0.3026888 | 0.841 | 0.569 | 1     | 11 |           |       |    |
| SARAF ASC IgG   |            |       |       |       |    |           |       |    |
| 0.005890458     | -0.4002809 | 0.721 | 0.512 | 1     | 11 |           |       |    |
| COX8A ASC IgG   |            |       |       |       |    |           |       |    |
| 0.006920745     | -0.3334119 | 0.31  | 0.222 | 1     | 11 |           |       |    |
| TMEM109 ASC IgG |            |       |       |       |    |           |       |    |
| 0.006974451     | -0.3453182 | 0.602 | 0.405 | 1     | 11 |           |       |    |
| MDH1 ASC IgG    |            |       |       |       |    |           |       |    |
| 0.00712363      | -0.3064492 | 0.451 | 0.284 | 1     | 11 |           |       |    |
| TUBA4A ASC IgG  |            |       |       |       |    |           |       |    |
| 0.007208281     | -0.3120811 | 0.444 | 0.294 | 1     | 11 |           |       |    |
| SDHD ASC IgG    |            |       |       |       |    |           |       |    |
| 0.007214844     | -0.5182689 | 0.395 | 0.265 | 1     | 11 |           |       |    |
| GPR183 ASC IgG  |            |       |       |       |    |           |       |    |
| 0.007807682     | -0.3713931 | 0.549 | 0.364 | 1     | 11 |           |       |    |
| CDC37 ASC IgG   |            |       |       |       |    |           |       |    |
| 0.007884328     | -0.3120679 | 0.43  | 0.277 | 1     | 11 |           |       |    |
| NDUFS2 ASC IgG  |            |       |       |       |    |           |       |    |
| 0.007922319     | -0.3450385 | 0.534 | 0.341 | 1     | 11 |           |       |    |
| ABRACL ASC IgG  |            |       |       |       |    |           |       |    |
| 0.009100765     | -0.3844922 | 0.897 | 0.711 | 1     | 11 |           |       |    |
| COX6B1 ASC IgG  |            |       |       |       |    |           |       |    |
| 0.009517634     | -0.4605256 | 0.638 | 0.473 | 1     | 11 |           |       |    |
| SQSTM1 ASC IgG  |            |       |       |       |    |           |       |    |
| 0.009576882     | -0.3937395 | 0.633 | 0.421 | 1     | 11 |           |       |    |
| MINOS1 ASC IgG  |            |       |       |       |    |           |       |    |
| 0               | 3.000747   | 0.976 | 0.285 | 0     | 12 | HMGB2     | DZ 3  |    |
| 0               | 2.560714   | 0.995 | 0.709 | 0     | 12 | HMG2      | DZ 3  |    |
| 0               | 2.365346   | 0.858 | 0.173 | 0     | 12 | PTTG1     | DZ 3  |    |
| 0               | 2.205517   | 0.975 | 0.414 | 0     | 12 | STMN1     | DZ 3  |    |
| 0               | 1.867187   | 0.973 | 0.689 | 0     | 12 | H2AFZ     | DZ 3  |    |
| 0               | 1.77418    | 0.988 | 0.762 | 0     | 12 | HMG1      | DZ 3  |    |
| 0               | 1.726624   | 0.995 | 0.93  | 0     | 12 | HMGB1     | DZ 3  |    |
| 0               | 1.628168   | 0.91  | 0.345 | 0     | 12 | H2AFV     | DZ 3  |    |
| 0               | 1.536923   | 0.661 | 0.08  | 0     | 12 | PCLAF     | DZ 3  |    |
| 0               | 1.527815   | 0.998 | 0.885 | 0     | 12 | GAPDH     | DZ 3  |    |
| 0               | 1.477411   | 0.641 | 0.08  | 0     | 12 | WDR66     | DZ 3  |    |
| 0               | 1.46717    | 0.594 | 0.051 | 0     | 12 | BIRC5     | DZ 3  |    |
| 0               | 1.309225   | 0.83  | 0.296 | 0     | 12 | CALM3     | DZ 3  |    |
| 0               | 1.266783   | 0.613 | 0.088 | 0     | 12 | MYBL2     | DZ 3  |    |
| 0               | 1.246498   | 0.997 | 0.931 | 0     | 12 | SERF2     | DZ 3  |    |
| 0               | 1.231091   | 1     | 0.989 | 0     | 12 | ACTB      | DZ 3  |    |
| 0               | 1.198554   | 0.993 | 0.848 | 0     | 12 | ATP5MG    | DZ 3  |    |
| 0               | 1.181296   | 0.986 | 0.78  | 0     | 12 | ACTG1     | DZ 3  |    |
| 0               | 1.121723   | 0.973 | 0.842 | 0     | 12 | HNRNPA2B1 | DZ    |    |
| 3               |            |       |       |       |    |           |       |    |
| 0               | 1.00433    | 0.995 | 0.897 | 0     | 12 | PFN1      | DZ 3  |    |
| 0               | 0.9719783  |       | 0.991 | 0.866 | 0  | 12        | ARPC2 | DZ |
| 3               |            |       |       |       |    |           |       |    |
| 0               | 0.9189811  | 1     | 0.917 | 0     | 12 | CFL1      | DZ    |    |

|               |           |       |       |               |               |      |        |    |
|---------------|-----------|-------|-------|---------------|---------------|------|--------|----|
| 3             |           |       |       |               |               |      |        |    |
| 0             | 0.758067  | 0.998 | 0.999 | 0             | 12            | PTMA | DZ 3   |    |
| 0             | -2.326285 |       | 0.995 | 1             | 0             | 12   | MALAT1 | DZ |
| 3             |           |       |       |               |               |      |        |    |
| 0             | -2.399661 |       | 0.175 | 0.712         | 0             | 12   | EMP3   | DZ |
| 3             |           |       |       |               |               |      |        |    |
| 3.45846e-323  | 1.302275  | 0.907 | 0.473 | 6.166087e-319 | 12            |      |        |    |
| RPS27L        | DZ 3      |       |       |               |               |      |        |    |
| 5.582942e-322 | 1.188048  | 0.937 | 0.542 | 9.953827e-318 | 12            |      |        |    |
| TCEA1         | DZ 3      |       |       |               |               |      |        |    |
| 6.844509e-318 | 1.344799  | 0.71  | 0.179 | 1.220307e-313 | 12            |      |        |    |
| DNMT1         | DZ 3      |       |       |               |               |      |        |    |
| 3.15241e-298  | 1.342472  | 0.672 | 0.147 | 5.620432e-294 | 12            |      |        |    |
| C12orf75      | DZ 3      |       |       |               |               |      |        |    |
| 8.122322e-296 | 1.062649  | 0.949 | 0.649 | 1.448129e-291 | 12            |      |        |    |
| SLC25A5       | DZ 3      |       |       |               |               |      |        |    |
| 4.028756e-288 | 1.128484  | 0.91  | 0.496 | 7.182868e-284 | 12            |      |        |    |
| MZT2B         | DZ 3      |       |       |               |               |      |        |    |
| 5.192192e-285 | 0.7485667 |       | 0.991 | 0.96          | 9.257158e-281 | 12   |        |    |
| OAZ1          | DZ 3      |       |       |               |               |      |        |    |
| 7.021598e-285 | -1.278893 |       | 0.936 | 0.987         | 1.251881e-280 | 12   |        |    |
| HLA-B         | DZ 3      |       |       |               |               |      |        |    |
| 1.467698e-284 | 1.461092  | 0.818 | 0.19  | 2.616759e-280 | 12            |      |        |    |
| RGS13         | DZ 3      |       |       |               |               |      |        |    |
| 8.033939e-282 | 0.8761476 |       | 0.979 | 0.867         | 1.432371e-277 | 12   |        |    |
| ARPC3         | DZ 3      |       |       |               |               |      |        |    |
| 2.36608e-280  | -1.091057 |       | 0.991 | 0.998         | 4.218483e-276 | 12   |        |    |
| B2M           | DZ 3      |       |       |               |               |      |        |    |
| 7.806971e-280 | 1.16548   | 0.773 | 0.271 | 1.391905e-275 | 12            |      |        |    |
| PRDX3         | DZ 3      |       |       |               |               |      |        |    |
| 2.880904e-279 | 1.095085  | 0.926 | 0.574 | 5.136364e-275 | 12            |      |        |    |
| ANP32B        | DZ 3      |       |       |               |               |      |        |    |
| 1.541758e-277 | 1.159443  | 0.881 | 0.44  | 2.7488e-273   | 12            |      |        |    |
| MRPL51        | DZ 3      |       |       |               |               |      |        |    |
| 8.140843e-277 | 1.234646  | 0.928 | 0.596 | 1.451431e-272 | 12            |      |        |    |
| DYNLL1        | DZ 3      |       |       |               |               |      |        |    |
| 7.984595e-273 | 1.120095  | 0.877 | 0.437 | 1.423573e-268 | 12            |      |        |    |
| SEM1          | DZ 3      |       |       |               |               |      |        |    |
| 7.870699e-268 | 1.115586  | 0.857 | 0.381 | 1.403267e-263 | 12            |      |        |    |
| YWHAE         | DZ 3      |       |       |               |               |      |        |    |
| 6.488431e-261 | -1.606025 |       | 0.73  | 0.909         | 1.156822e-256 | 12   |        |    |
| HLA-A         | DZ 3      |       |       |               |               |      |        |    |
| 6.862254e-260 | 1.178849  | 0.804 | 0.301 | 1.223471e-255 | 12            |      |        |    |
| HMG3          | DZ 3      |       |       |               |               |      |        |    |
| 1.521323e-253 | 0.9271439 |       | 0.961 | 0.632         | 2.712367e-249 | 12   |        |    |
| ATP5MF        | DZ 3      |       |       |               |               |      |        |    |
| 1.178575e-251 | 0.9902378 |       | 0.477 | 0.05          | 2.101281e-247 | 12   |        |    |
| HMGB3         | DZ 3      |       |       |               |               |      |        |    |
| 6.878696e-251 | 1.180056  | 0.555 | 0.072 | 1.226403e-246 | 12            |      |        |    |
| AICDA         | DZ 3      |       |       |               |               |      |        |    |

|                                 |                |       |                     |    |     |
|---------------------------------|----------------|-------|---------------------|----|-----|
| 8.918648e-250<br>ATP5MC3 DZ 3   | 1.018614 0.918 | 0.576 | 1.590106e-245       | 12 |     |
| 1.142025e-249<br>LSM5 DZ 3      | 1.071119 0.869 | 0.446 | 2.036117e-245       | 12 |     |
| 1.810592e-247<br>CCR7<br>DZ 3   | -2.111463      | 0.106 | 0.555 3.228104e-243 | 12 |     |
| 2.027884e-247<br>SLBP DZ 3      | 1.231384 0.683 | 0.231 | 3.615515e-243       | 12 |     |
| 1.285327e-246<br>CBX3 DZ 3      | 1.025384 0.89  | 0.479 | 2.29161e-242        | 12 |     |
| 1.147366e-245<br>UBE2J1 DZ 3    | 1.201751 0.761 | 0.221 | 2.045638e-241       | 12 |     |
| 1.22954e-241<br>ANP32E DZ 3     | 1.108801 0.736 | 0.25  | 2.192148e-237       | 12 |     |
| 1.628315e-240<br>S100A10 DZ 3   | 1.20395 0.835  | 0.336 | 2.903122e-236       | 12 |     |
| 6.408396e-240<br>TROAP<br>DZ 3  | 0.7792626      | 0.355 | 0.023 1.142553e-235 | 12 |     |
| 3.382762e-236<br>COR01A<br>DZ 3 | 0.9193507      | 0.972 | 0.81 6.031126e-232  | 12 |     |
| 9.229361e-236<br>COX8A DZ 3     | 1.017656 0.882 | 0.508 | 1.645503e-231       | 12 |     |
| 1.575606e-226<br>DZ 3           | 1.068545 0.828 | 0.413 | 2.809148e-222       | 12 | DEK |
| 1.778748e-225<br>TMA7<br>DZ 3   | 0.8197873      | 0.975 | 0.803 3.171329e-221 | 12 |     |
| 1.32177e-223<br>EZR<br>DZ 3     | 0.9766956      | 0.936 | 0.687 2.356584e-219 | 12 |     |
| 3.886663e-223<br>SUSD3 DZ 3     | 1.109808 0.658 | 0.148 | 6.929532e-219       | 12 |     |
| 3.335399e-222<br>LDHB<br>DZ 3   | 0.9349991      | 0.93  | 0.57 5.946683e-218  | 12 |     |
| 3.706643e-222<br>HLA-E<br>DZ 3  | -1.633411      | 0.521 | 0.8 6.608573e-218   | 12 |     |
| 5.294985e-222<br>ATP5IF1 DZ 3   | 1.008789 0.9   | 0.548 | 9.440429e-218       | 12 |     |
| 7.088264e-222<br>METAP2 DZ 3    | 1.120797 0.827 | 0.407 | 1.263767e-217       | 12 |     |
| 2.555918e-220<br>HNRNPM<br>DZ 3 | 0.9144725      | 0.919 | 0.634 4.556946e-216 | 12 |     |
| 3.476756e-220<br>GCHFR DZ 3     | 1.154153 0.717 | 0.225 | 6.198709e-216       | 12 |     |
| 7.598085e-217<br>ACADM DZ 3     | 1.09661 0.816  | 0.363 | 1.354663e-212       | 12 |     |
| 3.575741e-214<br>SRSF9<br>DZ 3  | 0.9646033      | 0.898 | 0.525 6.375189e-210 | 12 |     |
| 5.921929e-211<br>PARP1 DZ 3     | 0.953478 0.905 | 0.531 | 1.055821e-206       | 12 |     |
| 5.446721e-210<br>COX6C<br>DZ 3  | 0.8305412      | 0.964 | 0.716 9.71096e-206  | 12 |     |

|                              |                        |       |               |               |     |
|------------------------------|------------------------|-------|---------------|---------------|-----|
| 1.076334e-207<br>BCAS4 DZ 3  | 1.037697 0.761         | 0.276 | 1.918996e-203 | 12            |     |
| 1.249188e-205<br>AC023590.1  | 1.000783 0.552<br>DZ 3 | 0.1   | 2.227177e-201 | 12            |     |
| 5.587743e-205<br>CD81 DZ 3   | 1.033824 0.637         | 0.14  | 9.962387e-201 | 12            |     |
| 1.679761e-204<br>S1PR2       | 0.9684616<br>DZ 3      | 0.428 | 0.063         | 2.994846e-200 | 12  |
| 6.358092e-204<br>CCND3 DZ 3  | 1.119774 0.67          | 0.225 | 1.133584e-199 | 12            |     |
| 2.097547e-202<br>SNRPD1      | 0.9310069<br>DZ 3      | 0.873 | 0.463         | 3.739716e-198 | 12  |
| 4.81247e-196<br>A4GALT       | 0.7802682<br>DZ 3      | 0.388 | 0.045         | 8.580153e-192 | 12  |
| 1.433488e-195<br>STAG3 DZ 3  | 1.025474 0.473         | 0.087 | 2.555766e-191 | 12            |     |
| 8.010951e-195<br>COX6A1      | 0.8410981<br>DZ 3      | 0.936 | 0.678         | 1.428272e-190 | 12  |
| 2.472012e-193<br>ARHGDI1B    | 0.8088277<br>DZ 3      | 0.969 | 0.771         | 4.40735e-189  | 12  |
| 9.380427e-193<br>DZ 3        | 1.004799 0.54          | 0.095 | 1.672436e-188 | 12            | HRK |
| 1.614308e-192<br>IGHM        | -1.401218<br>DZ 3      | 0.733 | 0.911         | 2.87815e-188  | 12  |
| 6.208504e-192<br>C4orf3 DZ 3 | 1.031462 0.863         | 0.482 | 1.106914e-187 | 12            |     |
| 1.973772e-191<br>SUGCT DZ 3  | 1.121857 0.468         | 0.068 | 3.519039e-187 | 12            |     |
| 6.048648e-191<br>HNRNPC      | 0.8219731<br>DZ 3      | 0.936 | 0.637         | 1.078413e-186 | 12  |
| 1.8833e-190<br>TFDP1         | 0.9057542<br>DZ 3      | 0.593 | 0.157         | 3.357736e-186 | 12  |
| 1.285131e-188<br>CENPW       | 0.8222805<br>DZ 3      | 0.431 | 0.059         | 2.291259e-184 | 12  |
| 3.084906e-188<br>GINS2       | 0.9413625<br>DZ 3      | 0.414 | 0.068         | 5.500078e-184 | 12  |
| 1.284902e-187<br>POMP        | 0.8471471<br>DZ 3      | 0.909 | 0.6           | 2.290851e-183 | 12  |
| 3.080414e-187<br>UBE2S DZ 3  | 1.147001 0.493         | 0.109 | 5.492069e-183 | 12            |     |
| 4.568386e-187<br>COX17       | 0.9504206<br>DZ 3      | 0.844 | 0.446         | 8.144976e-183 | 12  |
| 1.854664e-186<br>TMSB4X      | 0.5635903<br>DZ 3      | 0.999 | 0.998         | 3.30668e-182  | 12  |
| 2.561831e-186<br>DZ 3        | 1.022094 0.452         | 0.056 | 4.567489e-182 | 12            | TK1 |
| 9.862663e-182<br>SKA2        | 0.8688321<br>DZ 3      | 0.511 | 0.104         | 1.758414e-177 | 12  |
| 2.98356e-181<br>ATP5F1C      | 0.8807705<br>DZ 3      | 0.834 | 0.436         | 5.319388e-177 | 12  |

|               |           |       |       |               |     |
|---------------|-----------|-------|-------|---------------|-----|
| 5.885952e-181 | 0.8443057 | 0.924 | 0.626 | 1.049406e-176 | 12  |
| PSMA4         | DZ 3      |       |       |               |     |
| 9.104231e-181 | 0.9197952 | 0.815 | 0.409 | 1.623193e-176 | 12  |
| HNRNPD        | DZ 3      |       |       |               |     |
| 8.124684e-180 | 0.9428885 | 0.761 | 0.301 | 1.44855e-175  | 12  |
| PSIP1         | DZ 3      |       |       |               |     |
| 9.05336e-179  | 0.9453595 | 0.815 | 0.386 | 1.614124e-174 | 12  |
| NUCKS1        | DZ 3      |       |       |               |     |
| 1.029101e-178 | 0.9609544 | 0.84  | 0.419 | 1.834785e-174 | 12  |
| IRF8          | DZ 3      |       |       |               |     |
| 1.250709e-178 | 0.923457  | 0.676 | 0.233 | 2.229889e-174 | 12  |
| DCTN3         | DZ 3      |       |       |               |     |
| 1.639842e-178 | 0.8376309 | 0.901 | 0.55  | 2.923673e-174 | 12  |
| ATP5PF        | DZ 3      |       |       |               |     |
| 2.088328e-177 | 1.078738  | 0.657 | 0.178 | 3.72328e-173  | 12  |
| DAAM1         | DZ 3      |       |       |               |     |
| 1.232432e-175 | 0.7004641 | 0.968 | 0.742 | 2.197304e-171 | 12  |
| RAN           | DZ 3      |       |       |               |     |
| 1.16292e-173  | 0.9286386 | 0.753 | 0.31  | 2.07337e-169  | 12  |
| NAA38         | DZ 3      |       |       |               |     |
| 1.647899e-173 | 0.8019124 | 0.936 | 0.652 | 2.938038e-169 | 12  |
| UBL5          | DZ 3      |       |       |               |     |
| 3.589257e-173 | 0.6881879 | 0.963 | 0.738 | 6.399286e-169 | 12  |
| CHCHD2        | DZ 3      |       |       |               |     |
| 1.345265e-172 | 0.8230981 | 0.436 | 0.063 | 2.398473e-168 | 12  |
| CDCA7         | DZ 3      |       |       |               |     |
| 2.030407e-172 | 0.8678884 | 0.822 | 0.404 | 3.620013e-168 | 12  |
| HDAC1         | DZ 3      |       |       |               |     |
| 6.931507e-172 | 0.90037   | 0.812 | 0.43  | 1.235818e-167 | 12  |
| HMGA1         | DZ 3      |       |       |               |     |
| 1.348637e-171 | 0.7306986 | 0.352 | 0.049 | 2.404484e-167 | 12  |
| BFSP2         | DZ 3      |       |       |               |     |
| 1.645548e-170 | 0.8198501 | 0.87  | 0.506 | 2.933847e-166 | 12  |
| SRP9          | DZ 3      |       |       |               |     |
| 5.66833e-170  | 0.7503299 | 0.955 | 0.701 | 1.010607e-165 | 12  |
| NDUFA4        | DZ 3      |       |       |               |     |
| 9.605056e-170 | 1.081114  | 0.382 | 0.039 | 1.712485e-165 | 12  |
| CDC20         | DZ 3      |       |       |               |     |
| 3.075541e-169 | 0.9334876 | 0.506 | 0.121 | 5.483383e-165 | 12  |
| PHGDH         | DZ 3      |       |       |               |     |
| 1.434186e-166 | 0.8830286 | 0.828 | 0.442 | 2.557011e-162 | 12  |
| MAP1LC3B      | DZ 3      |       |       |               |     |
| 1.091109e-165 | 0.9412211 | 0.723 | 0.263 | 1.945338e-161 | 12  |
| ITGAE         | DZ 3      |       |       |               |     |
| 5.910642e-165 | 0.7766041 | 0.925 | 0.606 | 1.053808e-160 | 12  |
| UQCR10        | DZ 3      |       |       |               |     |
| 2.14545e-163  | 1.006819  | 0.616 | 0.136 | 3.825123e-159 | 12  |
|               | DZ 3      |       |       |               | BIK |
| 3.109456e-163 | 0.65174   | 0.979 | 0.9   | 5.543849e-159 | 12  |
| MYL6          | DZ 3      |       |       |               |     |

|               |                |       |       |               |    |
|---------------|----------------|-------|-------|---------------|----|
| 1.894311e-162 | -1.539701      | 0.294 | 0.614 | 3.377368e-158 | 12 |
| IGHD          | DZ 3           |       |       |               |    |
| 4.451589e-162 | 0.8755 0.835   | 0.427 |       | 7.936738e-158 | 12 |
| COTL1         | DZ 3           |       |       |               |    |
| 3.026489e-161 | 0.8204868      | 0.798 | 0.401 | 5.395927e-157 | 12 |
| MDH1          | DZ 3           |       |       |               |    |
| 4.626881e-160 | 0.9060675      | 0.705 | 0.27  | 8.249267e-156 | 12 |
| JPT1          | DZ 3           |       |       |               |    |
| 1.168335e-159 | 0.9354709      | 0.771 | 0.291 | 2.083024e-155 | 12 |
| BCL7A         | DZ 3           |       |       |               |    |
| 1.762511e-157 | 0.9522977      | 0.411 | 0.056 | 3.142381e-153 | 12 |
| CDKN3         | DZ 3           |       |       |               |    |
| 4.892377e-157 | -1.519916      | 0.214 | 0.52  | 8.72262e-153  | 12 |
| BANK1         | DZ 3           |       |       |               |    |
| 5.74265e-157  | 0.8312796      | 0.488 | 0.09  | 1.023857e-152 | 12 |
| CENPM         | DZ 3           |       |       |               |    |
| 2.809329e-156 | 0.7512923      | 0.356 | 0.041 | 5.008752e-152 | 12 |
| LINC01991     | DZ 3           |       |       |               |    |
| 1.08052e-153  | 0.8138419      | 0.785 | 0.391 | 1.92646e-149  | 12 |
| RPA3          | DZ 3           |       |       |               |    |
| 2.726063e-153 | 0.7958756      | 0.45  | 0.086 | 4.860297e-149 | 12 |
| PXMP2         | DZ 3           |       |       |               |    |
| 1.202433e-152 | 0.7524326      | 0.908 | 0.621 | 2.143817e-148 | 12 |
| ATP5F1B       | DZ 3           |       |       |               |    |
| 6.56918e-152  | 0.521982 0.99  | 0.925 |       | 1.171219e-147 | 12 |
| HNRNPA1       | DZ 3           |       |       |               |    |
| 8.08754e-152  | -1.126567      | 0.753 | 0.863 | 1.441927e-147 | 12 |
| UBB           | DZ 3           |       |       |               |    |
| 1.748291e-151 | 0.6119114      | 0.269 | 0.025 | 3.117028e-147 | 12 |
| PTMS          | DZ 3           |       |       |               |    |
| 4.898406e-150 | 0.6832361      | 0.951 | 0.71  | 8.733368e-146 | 12 |
| COX6B1        | DZ 3           |       |       |               |    |
| 8.402469e-150 | 1.001374 0.383 | 0.046 |       | 1.498076e-145 | 12 |
| CCNB2         | DZ 3           |       |       |               |    |
| 9.153158e-150 | 0.8454182      | 0.939 | 0.648 | 1.631916e-145 | 12 |
| TCL1A         | DZ 3           |       |       |               |    |
| 9.189227e-150 | 0.8714412      | 0.739 | 0.327 | 1.638347e-145 | 12 |
| NDUFC1        | DZ 3           |       |       |               |    |
| 1.577845e-149 | 0.9292299      | 0.524 | 0.145 | 2.81314e-145  | 12 |
| MCM7          | DZ 3           |       |       |               |    |
| 2.583511e-149 | 0.8190415      | 0.938 | 0.743 | 4.606142e-145 | 12 |
| HSP90AA1      | DZ 3           |       |       |               |    |
| 1.075697e-147 | -1.053502      | 0.909 | 0.962 | 1.917861e-143 | 12 |
| MT-ND2        | DZ 3           |       |       |               |    |
| 1.830911e-146 | 0.7851986      | 0.562 | 0.157 | 3.264331e-142 | 12 |
| CCDC167       | DZ 3           |       |       |               |    |
| 3.995691e-145 | -1.369084      | 0.295 | 0.584 | 7.123917e-141 | 12 |
| SARAF         | DZ 3           |       |       |               |    |
| 9.528522e-145 | 0.7564865      | 0.89  | 0.545 | 1.69884e-140  | 12 |
| SEC61G        | DZ 3           |       |       |               |    |

|               |                |       |               |               |    |
|---------------|----------------|-------|---------------|---------------|----|
| 4.072644e-143 | 0.6404654      | 0.303 | 0.038         | 7.261117e-139 | 12 |
| ASB2          | DZ 3           |       |               |               |    |
| 8.472068e-143 | 0.7785398      | 0.806 | 0.425         | 1.510485e-138 | 12 |
| LSM3          | DZ 3           |       |               |               |    |
| 1.011061e-142 | 0.782682 0.788 | 0.407 | 1.802621e-138 | 12            |    |
| DDX39A        | DZ 3           |       |               |               |    |
| 1.050547e-142 | 0.5642999      | 0.997 | 0.903         | 1.87302e-138  | 12 |
| ATP5F1E       | DZ 3           |       |               |               |    |
| 1.519063e-141 | 0.7148606      | 0.919 | 0.628         | 2.708337e-137 | 12 |
| UQCRH         | DZ 3           |       |               |               |    |
| 1.654717e-141 | 0.846847 0.706 | 0.309 | 2.950196e-137 | 12            |    |
| PRDX2         | DZ 3           |       |               |               |    |
| 2.180434e-141 | 0.7737282      | 0.501 | 0.132         | 3.887495e-137 | 12 |
| ANAPC15       | DZ 3           |       |               |               |    |
| 5.246315e-141 | -1.331231      | 0.086 | 0.39          | 9.353655e-137 | 12 |
| CD44          | DZ 3           |       |               |               |    |
| 1.008907e-140 | 0.6944691      | 0.9   | 0.597         | 1.798781e-136 | 12 |
| PSMB3         | DZ 3           |       |               |               |    |
| 2.981037e-140 | 0.8323394      | 0.383 | 0.051         | 5.31489e-136  | 12 |
| TYMS          | DZ 3           |       |               |               |    |
| 1.564633e-139 | 0.7468593      | 0.928 | 0.656         | 2.789584e-135 | 12 |
| DBI           | DZ 3           |       |               |               |    |
| 8.062072e-139 | 0.7204002      | 0.612 | 0.214         | 1.437387e-134 | 12 |
| DAZAP1        | DZ 3           |       |               |               |    |
| 1.463875e-138 | 0.7095586      | 0.384 | 0.061         | 2.609942e-134 | 12 |
| SNTA1         | DZ 3           |       |               |               |    |
| 1.936853e-138 | -0.9559652     | 0.921 | 0.97          | 3.453216e-134 | 12 |
| MT-ND3        | DZ 3           |       |               |               |    |
| 5.363198e-137 | 0.7180234      | 0.902 | 0.639         | 9.562046e-133 | 12 |
| SNRPG         | DZ 3           |       |               |               |    |
| 7.208309e-137 | 0.7573311      | 0.863 | 0.522         | 1.285169e-132 | 12 |
| PAIP2         | DZ 3           |       |               |               |    |
| 7.746425e-137 | 0.7397417      | 0.839 | 0.482         | 1.38111e-132  | 12 |
| SF3B6         | DZ 3           |       |               |               |    |
| 2.265747e-136 | 0.7473962      | 0.798 | 0.418         | 4.0396e-132   | 12 |
| MINOS1        | DZ 3           |       |               |               |    |
| 3.063393e-136 | 0.7130127      | 0.864 | 0.557         | 5.461724e-132 | 12 |
| SNRPB         | DZ 3           |       |               |               |    |
| 2.055962e-135 | 0.6559178      | 0.942 | 0.701         | 3.665575e-131 | 12 |
| COX7A2        | DZ 3           |       |               |               |    |
| 4.018407e-135 | 0.6650534      | 0.939 | 0.69          | 7.164418e-131 | 12 |
| ATP5MPL       | DZ 3           |       |               |               |    |
| 5.850144e-135 | 0.818091 0.767 | 0.371 | 1.043022e-130 | 12            |    |
| LSM8          | DZ 3           |       |               |               |    |
| 1.078586e-134 | 0.7466489      | 0.856 | 0.514         | 1.923011e-130 | 12 |
| TRAPPC1       | DZ 3           |       |               |               |    |
| 1.414266e-134 | 0.7386204      | 0.905 | 0.625         | 2.521494e-130 | 12 |
| GSTP1         | DZ 3           |       |               |               |    |
| 7.851977e-134 | 0.7722511      | 0.742 | 0.336         | 1.399929e-129 | 12 |
| H2AFY         | DZ 3           |       |               |               |    |

|               |                |       |               |               |    |
|---------------|----------------|-------|---------------|---------------|----|
| 1.25171e-133  | 0.7443122      | 0.838 | 0.475         | 2.231675e-129 | 12 |
| NDUFB1        | DZ 3           |       |               |               |    |
| 2.300785e-133 | 0.7053337      | 0.821 | 0.42          | 4.102069e-129 | 12 |
| SLIRP         | DZ 3           |       |               |               |    |
| 1.877712e-131 | 0.722336 0.842 | 0.493 | 3.347772e-127 | 12            |    |
| RTRAF         | DZ 3           |       |               |               |    |
| 1.010461e-130 | -1.329872      | 0.079 | 0.358         | 1.801552e-126 | 12 |
| LY6E          | DZ 3           |       |               |               |    |
| 1.660079e-130 | 0.7534967      | 0.703 | 0.301         | 2.959755e-126 | 12 |
| MZT2A         | DZ 3           |       |               |               |    |
| 8.326947e-129 | 0.7219806      | 0.42  | 0.091         | 1.484611e-124 | 12 |
| FAM241A       | DZ 3           |       |               |               |    |
| 1.154384e-128 | 0.7547116      | 0.655 | 0.239         | 2.05815e-124  | 12 |
| SH3KBP1       | DZ 3           |       |               |               |    |
| 1.276081e-128 | 0.6874012      | 0.896 | 0.607         | 2.275125e-124 | 12 |
| ARPC5         | DZ 3           |       |               |               |    |
| 1.317679e-128 | 0.7770163      | 0.464 | 0.094         | 2.34929e-124  | 12 |
| RMI2          | DZ 3           |       |               |               |    |
| 1.600636e-128 | 0.7755899      | 0.8   | 0.387         | 2.853775e-124 | 12 |
| BASP1         | DZ 3           |       |               |               |    |
| 1.658525e-128 | 0.7504975      | 0.522 | 0.147         | 2.956984e-124 | 12 |
| SMIM20        | DZ 3           |       |               |               |    |
| 3.447849e-128 | 0.8127448      | 0.511 | 0.137         | 6.14717e-124  | 12 |
| SEC14L1       | DZ 3           |       |               |               |    |
| 3.578399e-128 | 0.7980591      | 0.624 | 0.216         | 6.379927e-124 | 12 |
| UBE2G1        | DZ 3           |       |               |               |    |
| 6.677082e-128 | -1.863702      | 0.196 | 0.472         | 1.190457e-123 | 12 |
| S100A6        | DZ 3           |       |               |               |    |
| 6.788652e-128 | 0.8206957      | 0.606 | 0.197         | 1.210349e-123 | 12 |
| SNHG25        | DZ 3           |       |               |               |    |
| 5.634778e-127 | 0.7319726      | 0.746 | 0.355         | 1.004625e-122 | 12 |
| RBBP7         | DZ 3           |       |               |               |    |
| 6.545923e-127 | 0.7944207      | 0.615 | 0.208         | 1.167073e-122 | 12 |
| NANS          | DZ 3           |       |               |               |    |
| 1.685116e-126 | 0.6323792      | 0.894 | 0.586         | 3.004393e-122 | 12 |
| TBCA          | DZ 3           |       |               |               |    |
| 2.356121e-126 | 0.7781651      | 0.515 | 0.13          | 4.200728e-122 | 12 |
| SOCS1         | DZ 3           |       |               |               |    |
| 4.373798e-125 | 0.6620926      | 0.913 | 0.681         | 7.798044e-121 | 12 |
| PPP1CA        | DZ 3           |       |               |               |    |
| 1.510949e-124 | 0.720355 0.445 | 0.108 | 2.693871e-120 | 12            |    |
| LMNB1         | DZ 3           |       |               |               |    |
| 1.986511e-124 | 0.6091393      | 0.937 | 0.694         | 3.541751e-120 | 12 |
| ELOB          | DZ 3           |       |               |               |    |
| 2.275809e-124 | 0.7024161      | 0.825 | 0.46          | 4.05754e-120  | 12 |
| SNRPF         | DZ 3           |       |               |               |    |
| 2.311663e-124 | 0.7127761      | 0.755 | 0.391         | 4.121463e-120 | 12 |
| ENY2          | DZ 3           |       |               |               |    |
| 4.531649e-124 | 0.8322734      | 0.551 | 0.123         | 8.079478e-120 | 12 |
| NEIL1         | DZ 3           |       |               |               |    |



|               |                |       |       |               |    |
|---------------|----------------|-------|-------|---------------|----|
| 6.930257e-124 | 0.8106542      | 0.739 | 0.292 | 1.235596e-119 | 12 |
| CD27          | DZ 3           |       |       |               |    |
| 8.345341e-124 | 0.602296 0.949 | 0.741 |       | 1.487891e-119 | 12 |
| SNRPD2        | DZ 3           |       |       |               |    |
| 1.966515e-123 | 0.8578666      | 0.436 | 0.107 | 3.5061e-119   | 12 |
| GMDS          | DZ 3           |       |       |               |    |
| 1.97646e-123  | 0.7186349      | 0.742 | 0.365 | 3.523831e-119 | 12 |
| LCP1          | DZ 3           |       |       |               |    |
| 6.553724e-123 | 0.7394911      | 0.763 | 0.376 | 1.168463e-118 | 12 |
| NDUFB3        | DZ 3           |       |       |               |    |
| 1.571219e-122 | 0.6342657      | 0.909 | 0.633 | 2.801326e-118 | 12 |
| ERH           | DZ 3           |       |       |               |    |
| 2.077622e-122 | 0.759623 0.716 | 0.313 |       | 3.704193e-118 | 12 |
| HSBP1         | DZ 3           |       |       |               |    |
| 1.066927e-121 | 0.4192919      | 0.222 | 0.016 | 1.902224e-117 | 12 |
| AP002360.1    | DZ 3           |       |       |               |    |
| 2.604278e-121 | 0.7039203      | 0.743 | 0.357 | 4.643168e-117 | 12 |
| EWSR1         | DZ 3           |       |       |               |    |
| 3.069542e-121 | 0.6591886      | 0.899 | 0.615 | 5.472686e-117 | 12 |
| ARPC1B        | DZ 3           |       |       |               |    |
| 3.122623e-121 | 0.6441812      | 0.899 | 0.6   | 5.567324e-117 | 12 |
| POLR2L        | DZ 3           |       |       |               |    |
| 3.652439e-121 | 0.7585217      | 0.612 | 0.229 | 6.511934e-117 | 12 |
| ZBTB80S       | DZ 3           |       |       |               |    |
| 2.156591e-120 | 0.7536731      | 0.65  | 0.26  | 3.844986e-116 | 12 |
| TOP1          | DZ 3           |       |       |               |    |
| 2.752632e-120 | 0.6778134      | 0.856 | 0.507 | 4.907667e-116 | 12 |
| SMDT1         | DZ 3           |       |       |               |    |
| 2.648658e-119 | 0.7101452      | 0.662 | 0.271 | 4.722292e-115 | 12 |
| BABAM1        | DZ 3           |       |       |               |    |
| 2.79674e-119  | 0.6124428      | 0.916 | 0.632 | 4.986307e-115 | 12 |
| ATP5MD        | DZ 3           |       |       |               |    |
| 3.37913e-119  | 0.7006776      | 0.695 | 0.292 | 6.024651e-115 | 12 |
| HNRNPH3       | DZ 3           |       |       |               |    |
| 1.562719e-118 | 0.5671707      | 0.28  | 0.037 | 2.786172e-114 | 12 |
| CDT1          | DZ 3           |       |       |               |    |
| 2.21899e-118  | 0.7445928      | 0.548 | 0.168 | 3.956237e-114 | 12 |
| PLIN3         | DZ 3           |       |       |               |    |
| 2.621841e-118 | 0.7183671      | 0.712 | 0.336 | 4.67448e-114  | 12 |
| LSM6          | DZ 3           |       |       |               |    |
| 3.742298e-118 | 0.6139468      | 0.888 | 0.593 | 6.672142e-114 | 12 |
| PSMA2         | DZ 3           |       |       |               |    |
| 3.261063e-117 | 0.5271431      | 0.976 | 0.893 | 5.81415e-113  | 12 |
| PPIA          | DZ 3           |       |       |               |    |
| 3.703562e-117 | 0.6498538      | 0.367 | 0.063 | 6.60308e-113  | 12 |
| DHFR          | DZ 3           |       |       |               |    |
| 4.517783e-117 | 0.6448465      | 0.358 | 0.065 | 8.054756e-113 | 12 |
| HELLS         | DZ 3           |       |       |               |    |
| 1.242389e-116 | 0.6835941      | 0.808 | 0.425 | 2.215055e-112 | 12 |
| ROM01         | DZ 3           |       |       |               |    |

|               |                |       |               |               |
|---------------|----------------|-------|---------------|---------------|
| 1.642266e-116 | -1.34374 0.09  | 0.36  | 2.927997e-112 | 12            |
| TXNIP         | DZ 3           |       |               |               |
| 4.324063e-116 | 0.8887503      | 0.663 | 0.327         | 7.709371e-112 |
| DUT           | DZ 3           |       |               | 12            |
| 5.301995e-115 | 0.6767378      | 0.983 | 0.798         | 9.452926e-111 |
| RPS26         | DZ 3           |       |               | 12            |
| 5.334796e-115 | 0.5362318      | 0.989 | 0.938         | 9.511407e-111 |
| H3F3A         | DZ 3           |       |               | 12            |
| 7.178344e-115 | 0.6833329      | 0.731 | 0.344         | 1.279827e-110 |
| DGUOK         | DZ 3           |       |               | 12            |
| 2.438713e-114 | 0.741882 0.62  | 0.244 | 4.347982e-110 | 12            |
| MPC2          | DZ 3           |       |               |               |
| 7.139829e-114 | 0.6627749      | 0.722 | 0.353         | 1.27296e-109  |
| ELOC          | DZ 3           |       |               | 12            |
| 1.869698e-113 | 0.7184547      | 0.676 | 0.274         | 3.333485e-109 |
| CARHSP1       | DZ 3           |       |               | 12            |
| 3.485234e-113 | 0.6671613      | 0.809 | 0.476         | 6.213823e-109 |
| UBE2L3        | DZ 3           |       |               | 12            |
| 7.934927e-113 | 0.6809752      | 0.356 | 0.071         | 1.414718e-108 |
| GMNN          | DZ 3           |       |               | 12            |
| 3.041425e-112 | 0.673131 0.842 | 0.526 | 5.422556e-108 | 12            |
| SOD1          | DZ 3           |       |               |               |
| 9.722906e-112 | 0.6541826      | 0.461 | 0.117         | 1.733497e-107 |
| COMMD4        | DZ 3           |       |               | 12            |
| 1.062742e-111 | 0.8136211      | 0.861 | 0.525         | 1.894763e-107 |
| ISG20         | DZ 3           |       |               | 12            |
| 3.472463e-111 | 0.6979983      | 0.682 | 0.299         | 6.191054e-107 |
| FKBP3         | DZ 3           |       |               | 12            |
| 3.527319e-111 | 0.7323638      | 0.399 | 0.093         | 6.288858e-107 |
| AC084033.3    | DZ 3           |       |               | 12            |
| 9.8362e-111   | 0.5505177      | 0.264 | 0.036         | 1.753696e-106 |
| MND1          | DZ 3           |       |               | 12            |
| 1.93742e-110  | 0.70053 0.5    | 0.137 | 3.454225e-106 | 12            |
| SH2B2         | DZ 3           |       |               |               |
| 2.020464e-110 | 0.5525115      | 0.948 | 0.755         | 3.602284e-106 |
| PSMA7         | DZ 3           |       |               | 12            |
| 6.328618e-110 | 0.64656 0.346  | 0.054 | 1.128329e-105 | 12            |
| ZWINT         | DZ 3           |       |               |               |
| 2.759306e-109 | 0.5477023      | 0.969 | 0.827         | 4.919566e-105 |
| UQCRB         | DZ 3           |       |               | 12            |
| 3.061585e-109 | 0.5729938      | 0.939 | 0.729         | 5.458499e-105 |
| SKP1          | DZ 3           |       |               | 12            |
| 3.576895e-109 | 0.6775675      | 0.769 | 0.407         | 6.377247e-105 |
| PPP1CC        | DZ 3           |       |               | 12            |
| 1.261754e-108 | 0.5789305      | 0.27  | 0.035         | 2.24958e-104  |
| CLSPN         | DZ 3           |       |               | 12            |
| 1.776186e-108 | 0.6792942      | 0.355 | 0.071         | 3.166762e-104 |
| MAD2L1        | DZ 3           |       |               | 12            |
| 2.450695e-108 | -1.437656      | 0.161 | 0.377         | 4.369343e-104 |
| SELL          | DZ 3           |       |               | 12            |

|               |            |       |       |               |    |
|---------------|------------|-------|-------|---------------|----|
| 8.835571e-108 | 0.6072353  | 0.878 | 0.546 | 1.575294e-103 | 12 |
| NEDD8         | DZ 3       |       |       |               |    |
| 3.51551e-107  | 0.6019719  | 0.83  | 0.468 | 6.267802e-103 | 12 |
| UBE2N         | DZ 3       |       |       |               |    |
| 3.613476e-107 | -1.300809  | 0.263 | 0.5   | 6.442466e-103 | 12 |
| FXVD5         | DZ 3       |       |       |               |    |
| 4.936146e-107 | 0.7492197  | 0.505 | 0.156 | 8.800654e-103 | 12 |
| DEF8          | DZ 3       |       |       |               |    |
| 6.952281e-106 | 0.6014332  | 0.378 | 0.084 | 1.239522e-101 | 12 |
| MSH6          | DZ 3       |       |       |               |    |
| 7.434677e-106 | 0.8243391  | 0.4   | 0.085 | 1.325529e-101 | 12 |
| CCNB1         | DZ 3       |       |       |               |    |
| 7.705669e-106 | 0.5252308  | 0.25  | 0.034 | 1.373844e-101 | 12 |
| SYBU          | DZ 3       |       |       |               |    |
| 6.935786e-105 | 0.624798   | 0.824 | 0.489 | 1.236581e-100 | 12 |
| COX5A         | DZ 3       |       |       |               |    |
| 1.957297e-104 | 0.5364435  | 0.275 | 0.04  | 3.489665e-100 | 12 |
| LINC00467     | DZ 3       |       |       |               |    |
| 1.273042e-103 | 0.5650547  | 0.307 | 0.053 | 2.269706e-99  | 12 |
| WDR76         | DZ 3       |       |       |               |    |
| 3.834399e-103 | 0.7108922  | 0.718 | 0.321 | 6.836349e-99  | 12 |
| GRHPR         | DZ 3       |       |       |               |    |
| 5.193438e-103 | 0.5649029  | 0.323 | 0.06  | 9.259381e-99  | 12 |
| MCM6          | DZ 3       |       |       |               |    |
| 8.242051e-103 | -0.5989844 | 0.999 | 0.999 | 1.469475e-98  | 12 |
| RPL34         | DZ 3       |       |       |               |    |
| 1.275054e-102 | 0.8919478  | 0.827 | 0.48  | 2.273293e-98  | 12 |
| LTB           | DZ 3       |       |       |               |    |
| 1.530262e-102 | -0.9830451 | 0.761 | 0.868 | 2.728304e-98  | 12 |
| UBC           | DZ 3       |       |       |               |    |
| 1.582907e-102 | 0.6719226  | 0.751 | 0.365 | 2.822166e-98  | 12 |
| PTP4A2        | DZ 3       |       |       |               |    |
| 4.323875e-102 | 0.5506735  | 0.907 | 0.63  | 7.709037e-98  | 12 |
| SET           | DZ 3       |       |       |               |    |
| 4.565139e-102 | 0.5514703  | 0.312 | 0.055 | 8.139186e-98  | 12 |
| DTX1          | DZ 3       |       |       |               |    |
| 1.706128e-101 | 0.6285202  | 0.749 | 0.393 | 3.041856e-97  | 12 |
| UQCRFS1       | DZ 3       |       |       |               |    |
| 2.206135e-101 | 0.5399944  | 0.887 | 0.563 | 3.933317e-97  | 12 |
| SNRPE         | DZ 3       |       |       |               |    |
| 3.230836e-101 | 0.6096584  | 0.74  | 0.36  | 5.760258e-97  | 12 |
| FAM96B        | DZ 3       |       |       |               |    |
| 4.057014e-101 | 0.6832035  | 0.379 | 0.077 | 7.233251e-97  | 12 |
| TACC3         | DZ 3       |       |       |               |    |
| 4.674172e-101 | 0.6289952  | 0.518 | 0.165 | 8.333581e-97  | 12 |
| NUDT1         | DZ 3       |       |       |               |    |
| 1.529528e-100 | 0.6692769  | 0.737 | 0.374 | 2.726995e-96  | 12 |
| SMARCB1       | DZ 3       |       |       |               |    |
| 2.44694e-100  | 0.6551578  | 0.69  | 0.314 | 4.36265e-96   | 12 |
| IMP4          | DZ 3       |       |       |               |    |

|               |            |       |       |              |    |
|---------------|------------|-------|-------|--------------|----|
| 2.581726e-100 | 0.6338734  | 0.714 | 0.335 | 4.602959e-96 | 12 |
| POLR2J        | DZ 3       |       |       |              |    |
| 6.383013e-100 | 0.5550082  | 0.902 | 0.651 | 1.138027e-95 | 12 |
| RBX1          | DZ 3       |       |       |              |    |
| 1.515294e-99  | 0.6916194  | 0.527 | 0.159 | 2.701618e-95 | 12 |
| SEL1L3        | DZ 3       |       |       |              |    |
| 4.675054e-99  | 0.7058467  | 0.265 | 0.043 | 8.335154e-95 | 12 |
| HES6          | DZ 3       |       |       |              |    |
| 9.184778e-99  | 0.5425182  | 0.887 | 0.598 | 1.637554e-94 | 12 |
| RBM3          | DZ 3       |       |       |              |    |
| 1.756636e-98  | 0.4842695  | 0.223 | 0.028 | 3.131907e-94 | 12 |
| UHRF1         | DZ 3       |       |       |              |    |
| 2.156861e-98  | 0.5729288  | 0.888 | 0.647 | 3.845468e-94 | 12 |
| ATP5F1A       | DZ 3       |       |       |              |    |
| 4.356771e-98  | 0.7512806  | 0.369 | 0.077 | 7.767687e-94 | 12 |
| SH3TC1        | DZ 3       |       |       |              |    |
| 1.486302e-97  | 0.6003335  | 0.804 | 0.463 | 2.649927e-93 | 12 |
| NDUFB4        | DZ 3       |       |       |              |    |
| 1.735589e-97  | 0.6642338  | 0.705 | 0.329 | 3.094381e-93 | 12 |
| STK17A        | DZ 3       |       |       |              |    |
| 1.874547e-97  | 0.5837338  | 0.387 | 0.096 | 3.34213e-93  | 12 |
| BCL2L12       | DZ 3       |       |       |              |    |
| 4.786587e-97  | 0.5594704  | 0.864 | 0.571 | 8.534005e-93 | 12 |
| COPE          | DZ 3       |       |       |              |    |
| 9.859572e-97  | 0.6287348  | 0.762 | 0.437 | 1.757863e-92 | 12 |
| PGAM1         | DZ 3       |       |       |              |    |
| 1.190378e-96  | 0.5125555  | 0.94  | 0.802 | 2.122326e-92 | 12 |
| HNRNPK        | DZ 3       |       |       |              |    |
| 1.397243e-96  | 0.4931626  | 0.26  | 0.039 | 2.491145e-92 | 12 |
| MCM4          | DZ 3       |       |       |              |    |
| 5.27419e-96   | -1.201778  | 0.073 | 0.279 | 9.403353e-92 | 12 |
| KLF2          | DZ 3       |       |       |              |    |
| 4.243469e-95  | 0.5981555  | 0.819 | 0.51  | 7.56568e-91  | 12 |
| ATP5PB        | DZ 3       |       |       |              |    |
| 9.485273e-95  | -0.5826573 | 1     | 0.999 | 1.691129e-90 | 12 |
| RPS29         | DZ 3       |       |       |              |    |
| 3.25126e-94   | 0.5063587  | 0.271 | 0.045 | 5.796671e-90 | 12 |
| UCHL1         | DZ 3       |       |       |              |    |
| 1.049159e-93  | 0.5880222  | 0.561 | 0.213 | 1.870545e-89 | 12 |
| PSMD9         | DZ 3       |       |       |              |    |
| 1.274227e-93  | 0.5594744  | 0.907 | 0.612 | 2.27182e-89  | 12 |
| NDUFA1        | DZ 3       |       |       |              |    |
| 1.420878e-93  | 0.5906705  | 0.747 | 0.395 | 2.533284e-89 | 12 |
| PSMB2         | DZ 3       |       |       |              |    |
| 1.786423e-93  | 0.6058661  | 0.697 | 0.357 | 3.185014e-89 | 12 |
| PSMA5         | DZ 3       |       |       |              |    |
| 1.975876e-93  | 0.5967525  | 0.779 | 0.457 | 3.522789e-89 | 12 |
| PRDX6         | DZ 3       |       |       |              |    |
| 5.332856e-93  | 0.6737573  | 0.636 | 0.264 | 9.507948e-89 | 12 |
| POU2AF1       | DZ 3       |       |       |              |    |

|              |                |       |              |              |    |
|--------------|----------------|-------|--------------|--------------|----|
| 5.395603e-93 | 0.4952441      | 0.233 | 0.037        | 9.61982e-89  | 12 |
| ACY3         | DZ 3           |       |              |              |    |
| 2.422571e-92 | 0.5791251      | 0.279 | 0.05         | 4.319201e-88 | 12 |
| TUBB2A       | DZ 3           |       |              |              |    |
| 2.812607e-92 | 0.5127618      | 0.276 | 0.046        | 5.014597e-88 | 12 |
| RPL39L       | DZ 3           |       |              |              |    |
| 2.877602e-92 | 0.5221671      | 0.916 | 0.668        | 5.130476e-88 | 12 |
| ATP5ME       | DZ 3           |       |              |              |    |
| 3.585903e-92 | 0.602421 0.769 | 0.412 | 6.393306e-88 | 12           |    |
| NDUFA2       | DZ 3           |       |              |              |    |
| 4.016117e-92 | 0.4901658      | 0.893 | 0.591        | 7.160335e-88 | 12 |
| PRDX1        | DZ 3           |       |              |              |    |
| 1.80054e-91  | 0.6061887      | 0.792 | 0.45         | 3.210182e-87 | 12 |
| RAP1B        | DZ 3           |       |              |              |    |
| 2.124831e-91 | 0.5398688      | 0.844 | 0.535        | 3.788362e-87 | 12 |
| SUM01        | DZ 3           |       |              |              |    |
| 5.130059e-91 | 0.4612439      | 0.289 | 0.049        | 9.146383e-87 | 12 |
| MCM2         | DZ 3           |       |              |              |    |
| 1.146696e-90 | 0.632971 0.585 | 0.249 | 2.044445e-86 | 12           |    |
| CDV3         | DZ 3           |       |              |              |    |
| 1.234937e-90 | -1.034324      | 0.034 | 0.216        | 2.201769e-86 | 12 |
| PLAC8        | DZ 3           |       |              |              |    |
| 1.458891e-90 | 0.5648612      | 0.89  | 0.62         | 2.601057e-86 | 12 |
| ATP5P0       | DZ 3           |       |              |              |    |
| 2.679052e-90 | 0.6539243      | 0.549 | 0.201        | 4.776481e-86 | 12 |
| SYAP1        | DZ 3           |       |              |              |    |
| 4.137185e-90 | 0.6338409      | 0.64  | 0.294        | 7.376187e-86 | 12 |
| UGP2         | DZ 3           |       |              |              |    |
| 8.067431e-90 | 0.6131115      | 0.47  | 0.144        | 1.438342e-85 | 12 |
| MYL6B        | DZ 3           |       |              |              |    |
| 8.692496e-90 | 0.8139093      | 0.536 | 0.177        | 1.549785e-85 | 12 |
| RGS2         | DZ 3           |       |              |              |    |
| 1.075067e-89 | 0.4996603      | 0.899 | 0.625        | 1.916738e-85 | 12 |
| COX7B        | DZ 3           |       |              |              |    |
| 1.267916e-89 | 0.6942928      | 0.568 | 0.192        | 2.260568e-85 | 12 |
| HMCES        | DZ 3           |       |              |              |    |
| 3.249662e-89 | 0.5741986      | 0.818 | 0.511        | 5.793822e-85 | 12 |
| PSMB6        | DZ 3           |       |              |              |    |
| 7.180823e-89 | 0.6663841      | 0.324 | 0.07         | 1.280269e-84 | 12 |
| RGCC         | DZ 3           |       |              |              |    |
| 9.327443e-89 | 0.5305725      | 0.312 | 0.064        | 1.66299e-84  | 12 |
| TERF2        | DZ 3           |       |              |              |    |
| 1.489042e-88 | 0.5977848      | 0.609 | 0.24         | 2.654813e-84 | 12 |
| PPP2R5C      | DZ 3           |       |              |              |    |
| 1.752151e-88 | 0.6393409      | 0.755 | 0.41         | 3.123911e-84 | 12 |
| NDUFA12      | DZ 3           |       |              |              |    |
| 4.060118e-88 | -1.060757      | 0.458 | 0.625        | 7.238784e-84 | 12 |
| SUB1         | DZ 3           |       |              |              |    |
| 4.578497e-88 | 0.5958407      | 0.646 | 0.311        | 8.163002e-84 | 12 |
| LSM4         | DZ 3           |       |              |              |    |

|              |                |       |              |              |     |
|--------------|----------------|-------|--------------|--------------|-----|
| 5.217998e-88 | 0.5084315      | 0.253 | 0.046        | 9.303169e-84 | 12  |
| ASB13        | DZ 3           |       |              |              |     |
| 8.838389e-88 | 0.5125132      | 0.241 | 0.032        | 1.575796e-83 | 12  |
| SLC2A5       | DZ 3           |       |              |              |     |
| 1.290179e-87 | -1.107204      | 0.05  | 0.274        | 2.300261e-83 | 12  |
| GPR183       | DZ 3           |       |              |              |     |
| 1.396676e-87 | 0.5301515      | 0.89  | 0.625        | 2.490134e-83 | 12  |
| EIF3H        | DZ 3           |       |              |              |     |
| 1.600049e-87 | 0.575438 0.706 | 0.355 | 2.852728e-83 | 12           |     |
| PPP2CA       | DZ 3           |       |              |              |     |
| 2.354164e-87 | 0.524694 0.286 | 0.05  | 4.197239e-83 | 12           | MME |
| DZ 3         |                |       |              |              |     |
| 1.284931e-86 | 0.5721327      | 0.406 | 0.109        | 2.290903e-82 | 12  |
| C12orf49     | DZ 3           |       |              |              |     |
| 1.507341e-86 | 0.6000406      | 0.675 | 0.327        | 2.687438e-82 | 12  |
| SEPHS2       | DZ 3           |       |              |              |     |
| 1.657783e-86 | 0.5420059      | 0.862 | 0.559        | 2.955661e-82 | 12  |
| UQCRQ        | DZ 3           |       |              |              |     |
| 2.484374e-86 | 0.6001793      | 0.532 | 0.187        | 4.42939e-82  | 12  |
| UBE2E1       | DZ 3           |       |              |              |     |
| 3.390089e-86 | 0.3766185      | 0.987 | 0.922        | 6.044189e-82 | 12  |
| BTF3         | DZ 3           |       |              |              |     |
| 6.408237e-86 | 0.7006823      | 0.551 | 0.228        | 1.142525e-81 | 12  |
| DSTN         | DZ 3           |       |              |              |     |
| 1.198784e-85 | 0.5917882      | 0.477 | 0.17         | 2.137313e-81 | 12  |
| PMVK         | DZ 3           |       |              |              |     |
| 4.124977e-85 | 0.5607222      | 0.76  | 0.427        | 7.354421e-81 | 12  |
| KHDRBS1      | DZ 3           |       |              |              |     |
| 4.168101e-85 | 0.6249254      | 0.433 | 0.112        | 7.431308e-81 | 12  |
| VNN2         | DZ 3           |       |              |              |     |
| 8.099723e-85 | 0.5937782      | 0.615 | 0.262        | 1.4441e-80   | 12  |
| MRPL33       | DZ 3           |       |              |              |     |
| 8.638134e-85 | 0.5610457      | 0.573 | 0.225        | 1.540093e-80 | 12  |
| MRPL27       | DZ 3           |       |              |              |     |
| 1.015959e-84 | 0.3983686      | 0.201 | 0.021        | 1.811354e-80 | 12  |
| AL118516.1   | DZ 3           |       |              |              |     |
| 5.475075e-84 | -1.087561      | 0.101 | 0.302        | 9.761512e-80 | 12  |
| LINC00926    | DZ 3           |       |              |              |     |
| 5.489531e-84 | -0.962 0.032   | 0.225 | 9.787285e-80 | 12           |     |
| GBP2         | DZ 3           |       |              |              |     |
| 6.911452e-84 | 0.5806748      | 0.568 | 0.24         | 1.232243e-79 | 12  |
| MRPL13       | DZ 3           |       |              |              |     |
| 1.040311e-83 | 0.6471325      | 0.353 | 0.053        | 1.85477e-79  | 12  |
| MKI67        | DZ 3           |       |              |              |     |
| 1.641929e-83 | 0.6224673      | 0.405 | 0.104        | 2.927396e-79 | 12  |
| CPNE5        | DZ 3           |       |              |              |     |
| 2.359646e-83 | 0.5404745      | 0.868 | 0.581        | 4.207012e-79 | 12  |
| MARCKSL1     | DZ 3           |       |              |              |     |
| 6.655439e-83 | 0.5592509      | 0.519 | 0.189        | 1.186598e-78 | 12  |
| ETFB         | DZ 3           |       |              |              |     |

|              |                |       |              |              |    |
|--------------|----------------|-------|--------------|--------------|----|
| 6.865498e-83 | 0.6124605      | 0.646 | 0.297        | 1.22405e-78  | 12 |
| TIMM8B       | DZ 3           |       |              |              |    |
| 9.395284e-83 | 0.5396023      | 0.282 | 0.056        | 1.675085e-78 | 12 |
| DCAF12       | DZ 3           |       |              |              |    |
| 1.344806e-82 | -0.5189571     | 1     | 1            | 2.397655e-78 | 12 |
| RPS27        | DZ 3           |       |              |              |    |
| 1.532474e-82 | 0.5654898      | 0.379 | 0.095        | 2.732248e-78 | 12 |
| SEMA4A       | DZ 3           |       |              |              |    |
| 1.856553e-82 | 0.494612 0.865 | 0.565 | 3.310049e-78 | 12           |    |
| PARK7        | DZ 3           |       |              |              |    |
| 2.195272e-82 | 0.5594552      | 0.406 | 0.118        | 3.913951e-78 | 12 |
| ARL3         | DZ 3           |       |              |              |    |
| 4.34334e-82  | 0.5384586      | 0.453 | 0.147        | 7.74374e-78  | 12 |
| GNB1         | DZ 3           |       |              |              |    |
| 7.824282e-82 | 0.7610058      | 0.446 | 0.181        | 1.394991e-77 | 12 |
| PCNA         | DZ 3           |       |              |              |    |
| 1.016639e-81 | 0.56744 0.724  | 0.394 | 1.812565e-77 | 12           |    |
| MDH2         | DZ 3           |       |              |              |    |
| 1.200303e-81 | 0.5267853      | 0.758 | 0.437        | 2.14002e-77  | 12 |
| YWHAQ        | DZ 3           |       |              |              |    |
| 1.645881e-81 | 0.5398585      | 0.573 | 0.231        | 2.934441e-77 | 12 |
| CPSF6        | DZ 3           |       |              |              |    |
| 1.709112e-81 | 0.5611761      | 0.488 | 0.169        | 3.047176e-77 | 12 |
| HINT2        | DZ 3           |       |              |              |    |
| 1.721337e-81 | 0.4828925      | 0.252 | 0.051        | 3.068972e-77 | 12 |
| CENPU        | DZ 3           |       |              |              |    |
| 7.079632e-81 | 0.455158 0.258 | 0.044 | 1.262228e-76 | 12           |    |
| C6orf226     | DZ 3           |       |              |              |    |
| 8.856057e-81 | 0.5440336      | 0.627 | 0.282        | 1.578946e-76 | 12 |
| YWHAH        | DZ 3           |       |              |              |    |
| 1.003389e-80 | 0.5801825      | 0.466 | 0.141        | 1.788942e-76 | 12 |
| PTPN18       | DZ 3           |       |              |              |    |
| 1.33694e-80  | 0.5913702      | 0.678 | 0.323        | 2.383631e-76 | 12 |
| BPTF         | DZ 3           |       |              |              |    |
| 1.697434e-80 | -0.9591328     | 0.65  | 0.754        | 3.026355e-76 | 12 |
| HLA-C        | DZ 3           |       |              |              |    |
| 9.95468e-80  | 0.5734149      | 0.445 | 0.141        | 1.77482e-75  | 12 |
| SMARCA4      | DZ 3           |       |              |              |    |
| 1.043612e-79 | 0.301521 0.992 | 0.941 | 1.860655e-75 | 12           |    |
| YBX1         | DZ 3           |       |              |              |    |
| 2.295688e-79 | 0.5236627      | 0.359 | 0.091        | 4.092982e-75 | 12 |
| RAB30-AS1    | DZ 3           |       |              |              |    |
| 2.468381e-79 | 0.5608075      | 0.736 | 0.398        | 4.400876e-75 | 12 |
| LSM10        | DZ 3           |       |              |              |    |
| 3.432755e-79 | 0.5181414      | 0.791 | 0.482        | 6.120259e-75 | 12 |
| CCT8         | DZ 3           |       |              |              |    |
| 4.080866e-79 | -0.9694366     | 0.067 | 0.253        | 7.275777e-75 | 12 |
| TNFRSF13B    | DZ 3           |       |              |              |    |
| 1.950498e-78 | -1.146532      | 0.239 | 0.432        | 3.477542e-74 | 12 |
| PLP2         | DZ 3           |       |              |              |    |

|              |            |       |       |              |    |
|--------------|------------|-------|-------|--------------|----|
| 2.937885e-78 | 0.9891661  | 0.793 | 0.662 | 5.237956e-74 | 12 |
| TUBA1B       | DZ 3       |       |       |              |    |
| 3.377356e-78 | -0.5079567 | 0.999 | 0.999 | 6.021488e-74 | 12 |
| RPL13        | DZ 3       |       |       |              |    |
| 4.886727e-78 | -1.033947  | 0.173 | 0.386 | 8.712545e-74 | 12 |
| PDCD4        | DZ 3       |       |       |              |    |
| 1.181399e-77 | 0.5733317  | 0.385 | 0.06  | 2.106316e-73 | 12 |
| TOP2A        | DZ 3       |       |       |              |    |
| 8.867675e-77 | 0.5251165  | 0.724 | 0.395 | 1.581018e-72 | 12 |
| BZW1         | DZ 3       |       |       |              |    |
| 1.138726e-76 | -0.9470204 | 0.076 | 0.257 | 2.030235e-72 | 12 |
| FCMR         | DZ 3       |       |       |              |    |
| 1.852081e-76 | 0.6058591  | 0.651 | 0.264 | 3.302075e-72 | 12 |
| NCF1         | DZ 3       |       |       |              |    |
| 2.324611e-76 | -0.6446503 | 0.947 | 0.975 | 4.14455e-72  | 12 |
| MT-ND4       | DZ 3       |       |       |              |    |
| 4.643269e-76 | 0.4504935  | 0.913 | 0.677 | 8.278484e-72 | 12 |
| SLC25A3      | DZ 3       |       |       |              |    |
| 5.310596e-76 | 0.4277889  | 0.251 | 0.038 | 9.468261e-72 | 12 |
| AC025159.1   | DZ 3       |       |       |              |    |
| 1.057966e-75 | 0.5451826  | 0.484 | 0.18  | 1.886248e-71 | 12 |
| GLRX5        | DZ 3       |       |       |              |    |
| 1.810228e-75 | 0.4704656  | 0.806 | 0.496 | 3.227455e-71 | 12 |
| EIF3I        | DZ 3       |       |       |              |    |
| 4.267883e-75 | 0.4675013  | 0.847 | 0.589 | 7.609209e-71 | 12 |
| XRCC6        | DZ 3       |       |       |              |    |
| 4.514955e-75 | 0.5535089  | 0.512 | 0.179 | 8.049714e-71 | 12 |
| PRPSAP2      | DZ 3       |       |       |              |    |
| 5.133115e-75 | 0.5157936  | 0.775 | 0.468 | 9.15183e-71  | 12 |
| PRELID1      | DZ 3       |       |       |              |    |
| 6.076873e-75 | 0.4768095  | 0.823 | 0.506 | 1.083446e-70 | 12 |
| DNAJC8       | DZ 3       |       |       |              |    |
| 1.504713e-74 | 0.5414184  | 0.685 | 0.349 | 2.682753e-70 | 12 |
| GNAS         | DZ 3       |       |       |              |    |
| 2.198789e-74 | -0.8956083 | 0.9   | 0.936 | 3.920221e-70 | 12 |
| BTG1         | DZ 3       |       |       |              |    |
| 2.660377e-74 | -1.291668  | 0.287 | 0.46  | 4.743186e-70 | 12 |
| JUNB         | DZ 3       |       |       |              |    |
| 2.6743e-74   | 0.3064017  | 0.163 | 0.012 | 4.76801e-70  | 12 |
| AC104986.2   | DZ 3       |       |       |              |    |
| 2.981947e-74 | 0.5445777  | 0.592 | 0.26  | 5.316514e-70 | 12 |
| TXNDC17      | DZ 3       |       |       |              |    |
| 3.907344e-74 | 0.4897187  | 0.726 | 0.402 | 6.966404e-70 | 12 |
| HNRNPR       | DZ 3       |       |       |              |    |
| 7.765598e-74 | 0.39448    | 0.216 | 0.035 | 1.384528e-69 | 12 |
| EEPD1        | DZ 3       |       |       |              |    |
| 9.770269e-74 | 0.5259278  | 0.668 | 0.329 | 1.741941e-69 | 12 |
| HSD17B10     | DZ 3       |       |       |              |    |
| 1.008704e-73 | 0.5551734  | 0.428 | 0.146 | 1.798419e-69 | 12 |
| MZT1         | DZ 3       |       |       |              |    |



|              |            |       |       |              |    |
|--------------|------------|-------|-------|--------------|----|
| 1.643681e-73 | 0.4873896  | 0.714 | 0.381 | 2.930519e-69 | 12 |
| CCT5         | DZ 3       |       |       |              |    |
| 6.333953e-73 | -0.5874376 | 0.996 | 0.996 | 1.12928e-68  | 12 |
| RPS12        | DZ 3       |       |       |              |    |
| 6.43659e-73  | 0.5595707  | 0.468 | 0.138 | 1.14758e-68  | 12 |
| RBM38        | DZ 3       |       |       |              |    |
| 7.705053e-73 | 0.4728322  | 0.817 | 0.508 | 1.373734e-68 | 12 |
| CAPZB        | DZ 3       |       |       |              |    |
| 7.81179e-73  | 0.5222127  | 0.791 | 0.461 | 1.392764e-68 | 12 |
| MTDH         | DZ 3       |       |       |              |    |
| 8.790482e-73 | 0.4476807  | 0.27  | 0.056 | 1.567255e-68 | 12 |
| TCTEX1D2     | DZ 3       |       |       |              |    |
| 1.212012e-72 | -0.9314377 | 0.142 | 0.333 | 2.160897e-68 | 12 |
| TRBC2        | DZ 3       |       |       |              |    |
| 1.855696e-72 | 0.4921859  | 0.305 | 0.076 | 3.30852e-68  | 12 |
| LRWD1        | DZ 3       |       |       |              |    |
| 2.308847e-72 | 0.4997653  | 0.698 | 0.377 | 4.116443e-68 | 12 |
| SNRPC        | DZ 3       |       |       |              |    |
| 2.629685e-72 | 0.4031138  | 0.231 | 0.041 | 4.688465e-68 | 12 |
| CHAF1A       | DZ 3       |       |       |              |    |
| 2.909772e-72 | 0.5102116  | 0.685 | 0.358 | 5.187832e-68 | 12 |
| RPS19BP1     | DZ 3       |       |       |              |    |
| 3.080871e-72 | 0.4704042  | 0.337 | 0.088 | 5.492885e-68 | 12 |
| ILF3-DT      | DZ 3       |       |       |              |    |
| 4.554661e-72 | 0.5199341  | 0.633 | 0.291 | 8.120505e-68 | 12 |
| GTF2A2       | DZ 3       |       |       |              |    |
| 1.017784e-71 | 0.5433016  | 0.584 | 0.254 | 1.814608e-67 | 12 |
| THOC7        | DZ 3       |       |       |              |    |
| 1.036545e-71 | 0.4766693  | 0.276 | 0.063 | 1.848056e-67 | 12 |
| FUCA1        | DZ 3       |       |       |              |    |
| 1.150727e-71 | 0.537116   | 0.64  | 0.322 | 2.051631e-67 | 12 |
| RALY         | DZ 3       |       |       |              |    |
| 1.159464e-71 | 0.4944331  | 0.871 | 0.618 | 2.067209e-67 | 12 |
| LAMTOR5      | DZ 3       |       |       |              |    |
| 1.187652e-71 | 0.5200283  | 0.555 | 0.238 | 2.117466e-67 | 12 |
| TPM4         | DZ 3       |       |       |              |    |
| 2.145335e-71 | 0.42374    | 0.245 | 0.05  | 3.824917e-67 | 12 |
| BORCS8-MEF2B | DZ 3       |       |       |              |    |
| 2.745085e-71 | -1.006038  | 0.327 | 0.496 | 4.894213e-67 | 12 |
| ANKRD12      | DZ 3       |       |       |              |    |
| 3.188355e-71 | 0.479561   | 0.885 | 0.646 | 5.684519e-67 | 12 |
| YWHAB        | DZ 3       |       |       |              |    |
| 3.507843e-71 | 0.5657521  | 0.486 | 0.173 | 6.254134e-67 | 12 |
| ZNF106       | DZ 3       |       |       |              |    |
| 4.007656e-71 | 0.5216769  | 0.766 | 0.477 | 7.14525e-67  | 12 |
| RANBP1       | DZ 3       |       |       |              |    |
| 3.163158e-70 | 0.5311258  | 0.543 | 0.222 | 5.639595e-66 | 12 |
| SEPT1        | DZ 3       |       |       |              |    |
| 3.915988e-70 | 0.6272818  | 0.8   | 0.571 | 6.981816e-66 | 12 |
| TUBB         | DZ 3       |       |       |              |    |

|              |           |       |       |              |    |
|--------------|-----------|-------|-------|--------------|----|
| 4.305305e-70 | 0.4788055 | 0.823 | 0.549 | 7.675929e-66 | 12 |
| PGK1         | DZ 3      |       |       |              |    |
| 7.152564e-70 | -0.825188 | 0.95  | 0.963 | 1.275231e-65 | 12 |
| FTL          | DZ 3      |       |       |              |    |
| 8.618699e-70 | 0.5338445 | 0.476 | 0.174 | 1.536628e-65 | 12 |
| MED30        | DZ 3      |       |       |              |    |
| 1.711917e-69 | 0.3775542 | 0.215 | 0.028 | 3.052177e-65 | 12 |
| SNHG21       | DZ 3      |       |       |              |    |
| 1.793617e-69 | -1.017756 | 0.285 | 0.452 | 3.197839e-65 | 12 |
| PNRC1        | DZ 3      |       |       |              |    |
| 2.003934e-69 | 0.4831621 | 0.936 | 0.72  | 3.572814e-65 | 12 |
| LIMD2        | DZ 3      |       |       |              |    |
| 2.138709e-69 | 0.5764839 | 0.532 | 0.202 | 3.813103e-65 | 12 |
| ADA          | DZ 3      |       |       |              |    |
| 2.69128e-69  | 0.4528432 | 0.81  | 0.515 | 4.798284e-65 | 12 |
| NDUFB8       | DZ 3      |       |       |              |    |
| 2.985479e-69 | 0.4759878 | 0.677 | 0.341 | 5.322811e-65 | 12 |
| LSM14A       | DZ 3      |       |       |              |    |
| 3.961136e-69 | 0.5673168 | 0.936 | 0.854 | 7.062309e-65 | 12 |
| CD79B        | DZ 3      |       |       |              |    |
| 4.503165e-69 | 0.5009707 | 0.329 | 0.084 | 8.028693e-65 | 12 |
| RITA1        | DZ 3      |       |       |              |    |
| 6.450577e-69 | 0.4976594 | 0.442 | 0.152 | 1.150073e-64 | 12 |
| TPGS2        | DZ 3      |       |       |              |    |
| 9.052283e-69 | 0.4715202 | 0.373 | 0.104 | 1.613932e-64 | 12 |
| CENPH        | DZ 3      |       |       |              |    |
| 1.130538e-68 | 0.5249591 | 0.612 | 0.287 | 2.015635e-64 | 12 |
| LYPLA1       | DZ 3      |       |       |              |    |
| 1.235516e-68 | 0.5885305 | 0.611 | 0.281 | 2.202802e-64 | 12 |
| TUBA4A       | DZ 3      |       |       |              |    |
| 1.356035e-68 | 0.5391046 | 0.535 | 0.221 | 2.417675e-64 | 12 |
| HDDC2        | DZ 3      |       |       |              |    |
| 1.478627e-68 | 0.4324424 | 0.86  | 0.614 | 2.636243e-64 | 12 |
| ACTR3        | DZ 3      |       |       |              |    |
| 1.829186e-68 | 0.522859  | 0.772 | 0.431 | 3.261255e-64 | 12 |
| RHOH         | DZ 3      |       |       |              |    |
| 2.029597e-68 | 0.4586917 | 0.803 | 0.502 | 3.618569e-64 | 12 |
| PSMD8        | DZ 3      |       |       |              |    |
| 2.722468e-68 | 0.5400718 | 0.661 | 0.328 | 4.853889e-64 | 12 |
| COX14        | DZ 3      |       |       |              |    |
| 3.326433e-68 | 0.39472   | 0.191 | 0.026 | 5.930698e-64 | 12 |
| RNF144B      | DZ 3      |       |       |              |    |
| 4.776745e-68 | 0.5214084 | 0.641 | 0.307 | 8.516459e-64 | 12 |
| NDUFAF3      | DZ 3      |       |       |              |    |
| 4.933564e-68 | 0.4972585 | 0.539 | 0.213 | 8.796051e-64 | 12 |
| MPLKIP       | DZ 3      |       |       |              |    |
| 8.266758e-68 | 0.4299441 | 0.927 | 0.76  | 1.47388e-63  | 12 |
| MYL12A       | DZ 3      |       |       |              |    |
| 8.729731e-68 | 0.4519147 | 0.753 | 0.432 | 1.556424e-63 | 12 |
| ACTR2        | DZ 3      |       |       |              |    |

|              |            |       |       |              |    |
|--------------|------------|-------|-------|--------------|----|
| 8.828448e-68 | 0.4896988  | 0.446 | 0.162 | 1.574024e-63 | 12 |
| RPL26L1      | DZ 3       |       |       |              |    |
| 1.328372e-67 | 0.4848739  | 0.578 | 0.252 | 2.368354e-63 | 12 |
| UBE2V2       | DZ 3       |       |       |              |    |
| 1.530082e-67 | 0.4968909  | 0.637 | 0.301 | 2.727984e-63 | 12 |
| SCP2         | DZ 3       |       |       |              |    |
| 2.118321e-67 | -1.039816  | 0.542 | 0.651 | 3.776755e-63 | 12 |
| ZFP36L1      | DZ 3       |       |       |              |    |
| 2.261639e-67 | 0.5423828  | 0.673 | 0.32  | 4.032276e-63 | 12 |
| RFTN1        | DZ 3       |       |       |              |    |
| 2.772641e-67 | 0.4814823  | 0.34  | 0.093 | 4.943342e-63 | 12 |
| RRM1         | DZ 3       |       |       |              |    |
| 3.545828e-67 | 0.4397079  | 0.259 | 0.05  | 6.321857e-63 | 12 |
| SNHG19       | DZ 3       |       |       |              |    |
| 4.076684e-67 | 0.3090218  | 0.154 | 0.019 | 7.26832e-63  | 12 |
| CLDN23       | DZ 3       |       |       |              |    |
| 4.805536e-67 | 0.5332746  | 0.376 | 0.074 | 8.56779e-63  | 12 |
| NUSAP1       | DZ 3       |       |       |              |    |
| 4.885539e-67 | -1.097146  | 0.383 | 0.526 | 8.710428e-63 | 12 |
| ID3          | DZ 3       |       |       |              |    |
| 1.137461e-66 | 0.3305455  | 0.185 | 0.026 | 2.027979e-62 | 12 |
| E2F1         | DZ 3       |       |       |              |    |
| 1.638089e-66 | 0.4708784  | 0.683 | 0.34  | 2.920549e-62 | 12 |
| POLR2K       | DZ 3       |       |       |              |    |
| 2.214008e-66 | -0.9414459 | 0.156 | 0.332 | 3.947354e-62 | 12 |
| PTPN6        | DZ 3       |       |       |              |    |
| 2.735933e-66 | 0.4341593  | 0.864 | 0.607 | 4.877895e-62 | 12 |
| COX5B        | DZ 3       |       |       |              |    |
| 3.286515e-66 | 0.5001301  | 0.636 | 0.308 | 5.859528e-62 | 12 |
| SCAND1       | DZ 3       |       |       |              |    |
| 4.375741e-66 | 0.5375769  | 0.622 | 0.292 | 7.801509e-62 | 12 |
| CDK2AP2      | DZ 3       |       |       |              |    |
| 5.976166e-66 | 0.4690694  | 0.815 | 0.516 | 1.065491e-61 | 12 |
| FKBP1A       | DZ 3       |       |       |              |    |
| 1.009945e-65 | 0.4853395  | 0.361 | 0.106 | 1.800631e-61 | 12 |
| BRI3BP       | DZ 3       |       |       |              |    |
| 1.153904e-65 | -0.9840589 | 0.2   | 0.351 | 2.057296e-61 | 12 |
| TRAF3IP3     | DZ 3       |       |       |              |    |
| 2.197639e-65 | 0.5415626  | 0.693 | 0.357 | 3.918171e-61 | 12 |
| SNAP23       | DZ 3       |       |       |              |    |
| 4.163404e-65 | 0.4038611  | 0.877 | 0.59  | 7.422933e-61 | 12 |
| SEC61B       | DZ 3       |       |       |              |    |
| 4.484825e-65 | 0.5667401  | 0.479 | 0.161 | 7.995994e-61 | 12 |
| SMC4         | DZ 3       |       |       |              |    |
| 5.130138e-65 | 0.4557129  | 0.709 | 0.379 | 9.146523e-61 | 12 |
| NDUFS6       | DZ 3       |       |       |              |    |
| 5.65954e-65  | 0.5808707  | 0.258 | 0.058 | 1.009039e-60 | 12 |
| HOPX         | DZ 3       |       |       |              |    |
| 6.444207e-65 | 0.4431093  | 0.281 | 0.065 | 1.148938e-60 | 12 |
| MTA3         | DZ 3       |       |       |              |    |

|              |                |       |              |              |    |
|--------------|----------------|-------|--------------|--------------|----|
| 6.463995e-65 | 0.4527165      | 0.765 | 0.448        | 1.152466e-60 | 12 |
| PPP4C        | DZ 3           |       |              |              |    |
| 1.021948e-64 | 0.4855942      | 0.229 | 0.04         | 1.822031e-60 | 12 |
| TPX2         | DZ 3           |       |              |              |    |
| 1.281483e-64 | 0.505374 0.595 | 0.261 | 2.284756e-60 | 12           |    |
| SEPT9        | DZ 3           |       |              |              |    |
| 1.299591e-64 | 0.5229888      | 0.35  | 0.109        | 2.31704e-60  | 12 |
| FEN1         | DZ 3           |       |              |              |    |
| 3.537957e-64 | 0.459834 0.632 | 0.3   | 6.307823e-60 | 12           |    |
| MMADHC       | DZ 3           |       |              |              |    |
| 3.642398e-64 | 0.4998334      | 0.514 | 0.213        | 6.494032e-60 | 12 |
| TAF9         | DZ 3           |       |              |              |    |
| 3.822581e-64 | 0.4854676      | 0.33  | 0.089        | 6.815279e-60 | 12 |
| FAM76B       | DZ 3           |       |              |              |    |
| 4.836367e-64 | 0.4510116      | 0.723 | 0.412        | 8.622758e-60 | 12 |
| MAG0H        | DZ 3           |       |              |              |    |
| 5.715199e-64 | 0.3329453      | 0.178 | 0.026        | 1.018963e-59 | 12 |
| CHEK1        | DZ 3           |       |              |              |    |
| 5.97266e-64  | 0.4894058      | 0.661 | 0.339        | 1.064866e-59 | 12 |
| LAMTOR2      | DZ 3           |       |              |              |    |
| 6.120725e-64 | 0.4554699      | 0.731 | 0.409        | 1.091264e-59 | 12 |
| COX7A2L      | DZ 3           |       |              |              |    |
| 6.15918e-64  | 0.4812045      | 0.504 | 0.214        | 1.09812e-59  | 12 |
| MRPL4        | DZ 3           |       |              |              |    |
| 6.193381e-64 | -1.169915      | 0.151 | 0.32         | 1.104218e-59 | 12 |
| CD69         | DZ 3           |       |              |              |    |
| 7.77659e-64  | 0.626531 0.592 | 0.26  | 1.386488e-59 | 12           |    |
| PIM1         | DZ 3           |       |              |              |    |
| 8.730299e-64 | 0.4891486      | 0.654 | 0.331        | 1.556525e-59 | 12 |
| RBBP4        | DZ 3           |       |              |              |    |
| 1.612376e-63 | -1.509 0.111   | 0.291 | 2.874706e-59 | 12           |    |
| MIR155HG     | DZ 3           |       |              |              |    |
| 1.840185e-63 | 0.5181446      | 0.479 | 0.183        | 3.280866e-59 | 12 |
| LBR          | DZ 3           |       |              |              |    |
| 2.50868e-63  | 0.4667027      | 0.688 | 0.371        | 4.472726e-59 | 12 |
| ANAPC11      | DZ 3           |       |              |              |    |
| 2.541104e-63 | 0.3850732      | 0.207 | 0.033        | 4.530534e-59 | 12 |
| ARRDC1-AS1   | DZ 3           |       |              |              |    |
| 3.320869e-63 | 0.3730321      | 0.157 | 0.022        | 5.920778e-59 | 12 |
| IQCD         | DZ 3           |       |              |              |    |
| 3.335813e-63 | 0.4580175      | 0.697 | 0.384        | 5.947422e-59 | 12 |
| SSB          | DZ 3           |       |              |              |    |
| 4.099679e-63 | -0.8537098     | 0.123 | 0.283        | 7.309318e-59 | 12 |
| IFITM2       | DZ 3           |       |              |              |    |
| 5.215725e-63 | 0.4947938      | 0.456 | 0.174        | 9.299117e-59 | 12 |
| MRPS33       | DZ 3           |       |              |              |    |
| 6.922165e-63 | 0.4853959      | 0.612 | 0.325        | 1.234153e-58 | 12 |
| EIF3A        | DZ 3           |       |              |              |    |
| 8.649208e-63 | 0.5365495      | 0.695 | 0.391        | 1.542067e-58 | 12 |
| NDUFS5       | DZ 3           |       |              |              |    |

|              |           |       |       |              |    |
|--------------|-----------|-------|-------|--------------|----|
| 1.124037e-62 | -0.463718 | 1     | 0.999 | 2.004045e-58 | 12 |
| RPL32        | DZ 3      |       |       |              |    |
| 1.566007e-62 | 0.4210987 | 0.282 | 0.07  | 2.792033e-58 | 12 |
| EZH2         | DZ 3      |       |       |              |    |
| 1.845111e-62 | 0.4998965 | 0.358 | 0.11  | 3.289649e-58 | 12 |
| ABI3         | DZ 3      |       |       |              |    |
| 1.907194e-62 | 0.3980264 | 0.933 | 0.795 | 3.400336e-58 | 12 |
| SUM02        | DZ 3      |       |       |              |    |
| 2.036775e-62 | 0.4622711 | 0.242 | 0.053 | 3.631366e-58 | 12 |
| RGS16        | DZ 3      |       |       |              |    |
| 3.118868e-62 | 0.3873461 | 0.246 | 0.047 | 5.56063e-58  | 12 |
| UNG          | DZ 3      |       |       |              |    |
| 1.02255e-61  | 0.4475488 | 0.278 | 0.061 | 1.823104e-57 | 12 |
| ZBED5-AS1    | DZ 3      |       |       |              |    |
| 2.341974e-61 | 0.4856869 | 0.562 | 0.259 | 4.175506e-57 | 12 |
| PPP1R7       | DZ 3      |       |       |              |    |
| 3.029149e-61 | 0.4032258 | 0.753 | 0.444 | 5.40067e-57  | 12 |
| PCNP         | DZ 3      |       |       |              |    |
| 3.046627e-61 | 0.4249736 | 0.83  | 0.559 | 5.431831e-57 | 12 |
| RAC1         | DZ 3      |       |       |              |    |
| 3.440554e-61 | 0.5200794 | 0.544 | 0.231 | 6.134165e-57 | 12 |
| NCF4         | DZ 3      |       |       |              |    |
| 4.199003e-61 | 0.4447868 | 0.725 | 0.406 | 7.486402e-57 | 12 |
| HCLS1        | DZ 3      |       |       |              |    |
| 6.15353e-61  | 0.4673331 | 0.449 | 0.161 | 1.097113e-56 | 12 |
| CYB5R3       | DZ 3      |       |       |              |    |
| 6.26932e-61  | 0.4731678 | 0.412 | 0.146 | 1.117757e-56 | 12 |
| DTYMK        | DZ 3      |       |       |              |    |
| 9.931323e-61 | 0.4710471 | 0.532 | 0.24  | 1.770655e-56 | 12 |
| SNRPA1       | DZ 3      |       |       |              |    |
| 1.265988e-60 | 0.4820064 | 0.726 | 0.415 | 2.25713e-56  | 12 |
| GABARAPL2    | DZ 3      |       |       |              |    |
| 1.299681e-60 | 0.4966754 | 0.445 | 0.165 | 2.317201e-56 | 12 |
| BLOC1S6      | DZ 3      |       |       |              |    |
| 1.475185e-60 | 0.5212253 | 0.5   | 0.219 | 2.630108e-56 | 12 |
| MCM5         | DZ 3      |       |       |              |    |
| 1.75607e-60  | 0.396978  | 0.886 | 0.672 | 3.130898e-56 | 12 |
| HNRNPA3      | DZ 3      |       |       |              |    |
| 1.808799e-60 | 0.3026456 | 0.163 | 0.022 | 3.224907e-56 | 12 |
| AC022167.3   | DZ 3      |       |       |              |    |
| 2.656152e-60 | 0.4076495 | 0.753 | 0.442 | 4.735653e-56 | 12 |
| MRPS21       | DZ 3      |       |       |              |    |
| 5.42958e-60  | 0.4797813 | 0.554 | 0.231 | 9.680398e-56 | 12 |
| PTRHD1       | DZ 3      |       |       |              |    |
| 5.933211e-60 | 0.4477276 | 0.785 | 0.495 | 1.057832e-55 | 12 |
| GNG5         | DZ 3      |       |       |              |    |
| 9.344786e-60 | 0.4932218 | 0.575 | 0.283 | 1.666082e-55 | 12 |
| SIVA1        | DZ 3      |       |       |              |    |
| 1.164907e-59 | 0.6032387 | 0.264 | 0.048 | 2.076912e-55 | 12 |
| CENPF        | DZ 3      |       |       |              |    |

|              |                |       |              |              |    |
|--------------|----------------|-------|--------------|--------------|----|
| 1.897831e-59 | 0.4897494      | 0.579 | 0.253        | 3.383642e-55 | 12 |
| CCDC69       | DZ 3           |       |              |              |    |
| 1.905679e-59 | 0.5300348      | 0.447 | 0.192        | 3.397635e-55 | 12 |
| MCM3         | DZ 3           |       |              |              |    |
| 2.971727e-59 | 0.5170418      | 0.554 | 0.248        | 5.298292e-55 | 12 |
| RAD21        | DZ 3           |       |              |              |    |
| 3.880042e-59 | 0.4888166      | 0.473 | 0.186        | 6.917726e-55 | 12 |
| CBX5         | DZ 3           |       |              |              |    |
| 3.956968e-59 | 0.4473089      | 0.64  | 0.328        | 7.054878e-55 | 12 |
| PPM1G        | DZ 3           |       |              |              |    |
| 6.327111e-59 | 0.4685065      | 0.511 | 0.215        | 1.128061e-54 | 12 |
| RPIA         | DZ 3           |       |              |              |    |
| 8.109911e-59 | 0.4744742      | 0.527 | 0.211        | 1.445916e-54 | 12 |
| LY86         | DZ 3           |       |              |              |    |
| 8.132906e-59 | 0.448757 0.61  | 0.295 | 1.450016e-54 | 12           |    |
| SNF8         | DZ 3           |       |              |              |    |
| 8.519221e-59 | 0.3564132      | 0.95  | 0.796        | 1.518892e-54 | 12 |
| LAPTM5       | DZ 3           |       |              |              |    |
| 1.193255e-58 | 0.4675012      | 0.706 | 0.433        | 2.127455e-54 | 12 |
| FDPS         | DZ 3           |       |              |              |    |
| 1.80814e-58  | 0.3782916      | 0.227 | 0.046        | 3.223734e-54 | 12 |
| PEX5         | DZ 3           |       |              |              |    |
| 2.181737e-58 | 0.4972635      | 0.627 | 0.312        | 3.889819e-54 | 12 |
| AP3S1        | DZ 3           |       |              |              |    |
| 2.33326e-58  | 0.5417848      | 0.402 | 0.131        | 4.15997e-54  | 12 |
| SIT1         | DZ 3           |       |              |              |    |
| 2.342088e-58 | 0.406653 0.72  | 0.4   | 4.175708e-54 | 12           |    |
| GUK1         | DZ 3           |       |              |              |    |
| 2.944336e-58 | -0.9397996     | 0.052 | 0.201        | 5.249457e-54 | 12 |
| ACP5         | DZ 3           |       |              |              |    |
| 6.174663e-58 | 0.4086898      | 0.766 | 0.49         | 1.100881e-53 | 12 |
| EIF4G2       | DZ 3           |       |              |              |    |
| 6.596851e-58 | 0.4055091      | 0.738 | 0.436        | 1.176153e-53 | 12 |
| CCT7         | DZ 3           |       |              |              |    |
| 7.72277e-58  | 0.4582663      | 0.459 | 0.179        | 1.376893e-53 | 12 |
| MRPL36       | DZ 3           |       |              |              |    |
| 1.368657e-57 | -0.6735915     | 0.031 | 0.175        | 2.440179e-53 | 12 |
| BCL2         | DZ 3           |       |              |              |    |
| 1.771257e-57 | -0.7538767     | 0.053 | 0.199        | 3.157974e-53 | 12 |
| CLEC2B       | DZ 3           |       |              |              |    |
| 2.20133e-57  | -0.8351535     | 0.168 | 0.309        | 3.924751e-53 | 12 |
| ARHGAP24     | DZ 3           |       |              |              |    |
| 3.362175e-57 | 0.499271 0.676 | 0.352 | 5.994422e-53 | 12           |    |
| TPD52        | DZ 3           |       |              |              |    |
| 3.610752e-57 | 0.4390022      | 0.341 | 0.105        | 6.43761e-53  | 12 |
| CRIP1        | DZ 3           |       |              |              |    |
| 4.842993e-57 | 0.4819225      | 0.476 | 0.208        | 8.634572e-53 | 12 |
| PHAX         | DZ 3           |       |              |              |    |
| 5.071755e-57 | 0.613192 0.347 | 0.103 | 9.042431e-53 | 12           |    |
| VPREB3       | DZ 3           |       |              |              |    |

|              |               |       |              |              |    |
|--------------|---------------|-------|--------------|--------------|----|
| 6.31173e-57  | 0.4593095     | 0.599 | 0.281        | 1.125318e-52 | 12 |
| PFDN4        | DZ 3          |       |              |              |    |
| 9.541533e-57 | 0.4239225     | 0.27  | 0.064        | 1.70116e-52  | 12 |
| ST14         | DZ 3          |       |              |              |    |
| 1.068126e-56 | 0.330812 0.17 | 0.031 | 1.904362e-52 | 12           |    |
| KANK1        | DZ 3          |       |              |              |    |
| 1.315333e-56 | 0.3728076     | 0.873 | 0.65         | 2.345107e-52 | 12 |
| PSMB1        | DZ 3          |       |              |              |    |
| 2.91601e-56  | -0.8947898    | 0.12  | 0.282        | 5.198954e-52 | 12 |
| ADAM28       | DZ 3          |       |              |              |    |
| 3.478181e-56 | 0.4280864     | 0.409 | 0.144        | 6.201248e-52 | 12 |
| ARPC1A       | DZ 3          |       |              |              |    |
| 4.040129e-56 | -0.825698     | 0.141 | 0.283        | 7.203147e-52 | 12 |
| RNASSET2     | DZ 3          |       |              |              |    |
| 4.813121e-56 | 0.4181346     | 0.416 | 0.159        | 8.581314e-52 | 12 |
| HIGD1A       | DZ 3          |       |              |              |    |
| 4.9261e-56   | 0.3957342     | 0.296 | 0.077        | 8.782744e-52 | 12 |
| GSTZ1        | DZ 3          |       |              |              |    |
| 7.492253e-56 | 0.3777651     | 0.755 | 0.454        | 1.335794e-51 | 12 |
| HSPD1        | DZ 3          |       |              |              |    |
| 9.588663e-56 | 0.4702919     | 0.643 | 0.343        | 1.709563e-51 | 12 |
| MRPS6        | DZ 3          |       |              |              |    |
| 1.195545e-55 | 0.4168846     | 0.273 | 0.074        | 2.131537e-51 | 12 |
| FAM45A       | DZ 3          |       |              |              |    |
| 1.29482e-55  | 0.4465094     | 0.718 | 0.423        | 2.308535e-51 | 12 |
| CLTA         | DZ 3          |       |              |              |    |
| 1.409972e-55 | 0.4467414     | 0.509 | 0.221        | 2.513839e-51 | 12 |
| HIKESHI      | DZ 3          |       |              |              |    |
| 1.423011e-55 | -0.4324616    | 0.997 | 0.998        | 2.537087e-51 | 12 |
| RPL18A       | DZ 3          |       |              |              |    |
| 1.573881e-55 | 0.4340197     | 0.345 | 0.103        | 2.806073e-51 | 12 |
| MAP4K2       | DZ 3          |       |              |              |    |
| 1.865104e-55 | -0.3572618    | 1     | 0.999        | 3.325293e-51 | 12 |
| RPLP1        | DZ 3          |       |              |              |    |
| 1.973407e-55 | 0.4210065     | 0.585 | 0.279        | 3.518387e-51 | 12 |
| MRPS15       | DZ 3          |       |              |              |    |
| 1.97555e-55  | 0.4517644     | 0.552 | 0.224        | 3.522209e-51 | 12 |
| IL4R         | DZ 3          |       |              |              |    |
| 2.939685e-55 | 0.4581537     | 0.542 | 0.257        | 5.241165e-51 | 12 |
| SYNCRIP      | DZ 3          |       |              |              |    |
| 3.045211e-55 | 0.4481924     | 0.506 | 0.231        | 5.429307e-51 | 12 |
| HNRNPAB      | DZ 3          |       |              |              |    |
| 3.439802e-55 | 0.3402214     | 0.179 | 0.033        | 6.132824e-51 | 12 |
| MSRB2        | DZ 3          |       |              |              |    |
| 3.71984e-55  | 0.3232304     | 0.978 | 0.902        | 6.632102e-51 | 12 |
| SRP14        | DZ 3          |       |              |              |    |
| 3.880269e-55 | 0.3935244     | 0.863 | 0.596        | 6.918132e-51 | 12 |
| LSM7         | DZ 3          |       |              |              |    |
| 4.264807e-55 | 0.3999792     | 0.32  | 0.096        | 7.603724e-51 | 12 |
| AMZ2         | DZ 3          |       |              |              |    |

|              |                |       |       |              |    |
|--------------|----------------|-------|-------|--------------|----|
| 4.837961e-55 | 0.4308232      | 0.759 | 0.44  | 8.6256e-51   | 12 |
| HIGD2A       | DZ 3           |       |       |              |    |
| 6.597066e-55 | 0.4102746      | 0.666 | 0.36  | 1.176191e-50 | 12 |
| PFDN2        | DZ 3           |       |       |              |    |
| 1.244018e-54 | 0.3018417      | 0.159 | 0.02  | 2.217961e-50 | 12 |
| SNHG10       | DZ 3           |       |       |              |    |
| 1.34847e-54  | 0.453079 0.514 | 0.24  |       | 2.404187e-50 | 12 |
| HNRNPA1P48   | DZ 3           |       |       |              |    |
| 1.674424e-54 | 0.4298523      | 0.377 | 0.135 | 2.98533e-50  | 12 |
| RUVBL1       | DZ 3           |       |       |              |    |
| 2.648296e-54 | 0.497425 0.558 | 0.263 |       | 4.721648e-50 | 12 |
| TXNL4A       | DZ 3           |       |       |              |    |
| 2.741721e-54 | 0.3173061      | 0.171 | 0.027 | 4.888214e-50 | 12 |
| MIR3681HG    | DZ 3           |       |       |              |    |
| 3.17514e-54  | 0.3493005      | 0.214 | 0.045 | 5.660956e-50 | 12 |
| SHCBP1       | DZ 3           |       |       |              |    |
| 3.260296e-54 | 0.4767494      | 0.496 | 0.208 | 5.812781e-50 | 12 |
| SNRNP25      | DZ 3           |       |       |              |    |
| 3.43001e-54  | -1.178661      | 0.348 | 0.475 | 6.115365e-50 | 12 |
| CD83         | DZ 3           |       |       |              |    |
| 3.471654e-54 | 0.446734 0.561 | 0.267 |       | 6.189613e-50 | 12 |
| SDHB         | DZ 3           |       |       |              |    |
| 3.910278e-54 | 0.3475944      | 0.866 | 0.647 | 6.971634e-50 | 12 |
| UBE2D3       | DZ 3           |       |       |              |    |
| 4.427967e-54 | 0.4162861      | 0.635 | 0.332 | 7.894623e-50 | 12 |
| STRAP        | DZ 3           |       |       |              |    |
| 4.473723e-54 | 0.3980039      | 0.592 | 0.295 | 7.976202e-50 | 12 |
| ODC1         | DZ 3           |       |       |              |    |
| 4.993437e-54 | 0.3023857      | 0.159 | 0.025 | 8.902799e-50 | 12 |
| LINC00877    | DZ 3           |       |       |              |    |
| 6.776699e-54 | 0.4160945      | 0.692 | 0.387 | 1.208218e-49 | 12 |
| NDUFAB1      | DZ 3           |       |       |              |    |
| 7.22735e-54  | 0.4077589      | 0.809 | 0.525 | 1.288564e-49 | 12 |
| SNRPB2       | DZ 3           |       |       |              |    |
| 7.956044e-54 | 0.4986043      | 0.516 | 0.199 | 1.418483e-49 | 12 |
| EAF2         | DZ 3           |       |       |              |    |
| 1.289486e-53 | 0.4417993      | 0.569 | 0.267 | 2.299025e-49 | 12 |
| RNF7         | DZ 3           |       |       |              |    |
| 1.390656e-53 | 0.346238 0.894 | 0.692 |       | 2.479401e-49 | 12 |
| RHOA         | DZ 3           |       |       |              |    |
| 1.732644e-53 | 0.4367999      | 0.513 | 0.236 | 3.089132e-49 | 12 |
| ETFA         | DZ 3           |       |       |              |    |
| 2.650329e-53 | 0.3933365      | 0.755 | 0.461 | 4.725271e-49 | 12 |
| PRDX5        | DZ 3           |       |       |              |    |
| 2.712086e-53 | 0.4677426      | 0.528 | 0.233 | 4.835378e-49 | 12 |
| RGS1         | DZ 3           |       |       |              |    |
| 3.105616e-53 | 0.4610175      | 0.492 | 0.21  | 5.537003e-49 | 12 |
| IFI27L2      | DZ 3           |       |       |              |    |
| 4.169012e-53 | 0.3935753      | 0.738 | 0.448 | 7.432932e-49 | 12 |
| PSMD4        | DZ 3           |       |       |              |    |



|              |            |       |       |              |              |
|--------------|------------|-------|-------|--------------|--------------|
| 4.299407e-53 | 0.43193    | 0.448 | 0.174 | 7.665412e-49 | 12           |
| TADA3        | DZ 3       |       |       |              |              |
| 4.681322e-53 | 0.4202527  |       | 0.421 | 0.166        | 8.346329e-49 |
| MRPL37       | DZ 3       |       |       |              | 12           |
| 6.059548e-53 | -0.4193326 |       | 0.998 | 0.998        | 1.080357e-48 |
| RPLP2        | DZ 3       |       |       |              | 12           |
| 6.111432e-53 | 0.3892704  |       | 0.346 | 0.113        | 1.089607e-48 |
| FMC1         | DZ 3       |       |       |              | 12           |
| 8.042444e-53 | 0.4862848  |       | 0.569 | 0.285        | 1.433887e-48 |
| HSPA4        | DZ 3       |       |       |              | 12           |
| 9.198013e-53 | -0.8922602 |       | 0.124 | 0.272        | 1.639914e-48 |
| JUN          | DZ 3       |       |       |              | 12           |
| 9.671379e-53 | 0.3698667  |       | 0.818 | 0.552        | 1.72431e-48  |
| YWHAZ        | DZ 3       |       |       |              | 12           |
| 1.08494e-52  | 0.4336044  |       | 0.555 | 0.267        | 1.93434e-48  |
| SEPT2        | DZ 3       |       |       |              | 12           |
| 1.235989e-52 | 0.460181   | 0.336 | 0.106 | 2.203645e-48 | 12           |
| TRAC         | DZ 3       |       |       |              |              |
| 1.246329e-52 | 0.4799263  |       | 0.386 | 0.111        | 2.22208e-48  |
| CD38         | DZ 3       |       |       |              | 12           |
| 1.743094e-52 | 0.4607908  |       | 0.39  | 0.134        | 3.107762e-48 |
| AIM2         | DZ 3       |       |       |              | 12           |
| 1.904361e-52 | -0.9712485 |       | 0.314 | 0.466        | 3.395285e-48 |
| CD63         | DZ 3       |       |       |              | 12           |
| 2.696108e-52 | 0.4745051  |       | 0.267 | 0.069        | 4.806892e-48 |
| H1FX         | DZ 3       |       |       |              | 12           |
| 2.959628e-52 | -0.8002119 |       | 0.037 | 0.175        | 5.276721e-48 |
| TNFRSF18     | DZ 3       |       |       |              | 12           |
| 3.247326e-52 | 0.4326247  |       | 0.389 | 0.134        | 5.789658e-48 |
| COR01B       | DZ 3       |       |       |              | 12           |
| 3.476064e-52 | 0.4314364  |       | 0.476 | 0.203        | 6.197474e-48 |
| ZCRB1        | DZ 3       |       |       |              | 12           |
| 3.643139e-52 | 0.3385784  |       | 0.196 | 0.039        | 6.495352e-48 |
| AL441992.1   | DZ 3       |       |       |              | 12           |
| 3.854086e-52 | 0.391447   | 0.645 | 0.365 | 6.87145e-48  | 12           |
| ARHGDIA      | DZ 3       |       |       |              |              |
| 3.964961e-52 | 0.3923768  |       | 0.29  | 0.082        | 7.069128e-48 |
| CSTF3        | DZ 3       |       |       |              | 12           |
| 4.783757e-52 | -0.9049966 |       | 0.291 | 0.417        | 8.52896e-48  |
| NPC2         | DZ 3       |       |       |              | 12           |
| 5.795522e-52 | 0.3735297  |       | 0.239 | 0.058        | 1.033284e-47 |
| ORC6         | DZ 3       |       |       |              | 12           |
| 6.216986e-52 | 0.4215846  |       | 0.474 | 0.2          | 1.108426e-47 |
| MRPS14       | DZ 3       |       |       |              | 12           |
| 9.108016e-52 | -0.8839819 |       | 0.185 | 0.331        | 1.623868e-47 |
| ZFP36        | DZ 3       |       |       |              | 12           |
| 9.344676e-52 | 0.399421   | 0.282 | 0.077 | 1.666062e-47 | 12           |
| BPNT1        | DZ 3       |       |       |              |              |
| 1.143582e-51 | 0.4286055  |       | 0.567 | 0.251        | 2.038893e-47 |
| SYNE2        | DZ 3       |       |       |              | 12           |

|              |            |       |       |              |    |
|--------------|------------|-------|-------|--------------|----|
| 1.610896e-51 | 0.4207388  | 0.538 | 0.234 | 2.872067e-47 | 12 |
| NC0A3        | DZ 3       |       |       |              |    |
| 2.384538e-51 | 0.3889457  | 0.73  | 0.442 | 4.251392e-47 | 12 |
| ILF2         | DZ 3       |       |       |              |    |
| 2.915583e-51 | 0.3461063  | 0.235 | 0.048 | 5.198192e-47 | 12 |
| ATAD2        | DZ 3       |       |       |              |    |
| 3.180113e-51 | 0.4511544  | 0.521 | 0.249 | 5.669823e-47 | 12 |
| RBM42        | DZ 3       |       |       |              |    |
| 3.410849e-51 | 0.4035052  | 0.269 | 0.074 | 6.081203e-47 | 12 |
| MY01E        | DZ 3       |       |       |              |    |
| 4.067982e-51 | 0.3862466  | 0.241 | 0.056 | 7.252805e-47 | 12 |
| TESC         | DZ 3       |       |       |              |    |
| 4.094983e-51 | 0.3549446  | 0.21  | 0.041 | 7.300946e-47 | 12 |
| MYBL1        | DZ 3       |       |       |              |    |
| 4.109511e-51 | -0.3128999 | 0.999 | 0.999 | 7.326848e-47 | 12 |
| RPL10        | DZ 3       |       |       |              |    |
| 5.010839e-51 | -1.347608  | 0.157 | 0.266 | 8.933825e-47 | 12 |
| S100A4       | DZ 3       |       |       |              |    |
| 6.298302e-51 | 0.4129054  | 0.705 | 0.421 | 1.122924e-46 | 12 |
| COPS9        | DZ 3       |       |       |              |    |
| 6.480511e-51 | 0.3776919  | 0.286 | 0.076 | 1.15541e-46  | 12 |
| SHLD1        | DZ 3       |       |       |              |    |
| 6.921857e-51 | 0.4440383  | 0.468 | 0.19  | 1.234098e-46 | 12 |
| POLD4        | DZ 3       |       |       |              |    |
| 7.136771e-51 | 0.4152667  | 0.698 | 0.422 | 1.272415e-46 | 12 |
| KTN1         | DZ 3       |       |       |              |    |
| 7.977511e-51 | 0.4352202  | 0.53  | 0.236 | 1.42231e-46  | 12 |
| WAS          | DZ 3       |       |       |              |    |
| 1.002922e-50 | 0.3690846  | 0.724 | 0.445 | 1.788109e-46 | 12 |
| VDAC1        | DZ 3       |       |       |              |    |
| 1.749684e-50 | 0.4348945  | 0.223 | 0.048 | 3.119511e-46 | 12 |
| SERPINA9     | DZ 3       |       |       |              |    |
| 2.265147e-50 | 0.4549611  | 0.427 | 0.158 | 4.038531e-46 | 12 |
| PPP1R18      | DZ 3       |       |       |              |    |
| 2.297194e-50 | 0.4484515  | 0.464 | 0.19  | 4.095666e-46 | 12 |
| IDH2         | DZ 3       |       |       |              |    |
| 2.714907e-50 | 0.3821976  | 0.57  | 0.286 | 4.840407e-46 | 12 |
| SSRP1        | DZ 3       |       |       |              |    |
| 2.983898e-50 | 0.4043703  | 0.518 | 0.214 | 5.319991e-46 | 12 |
| THUMPD3-AS1  | DZ 3       |       |       |              |    |
| 4.180503e-50 | 0.361166   | 0.839 | 0.612 | 7.453418e-46 | 12 |
| NDUFA13      | DZ 3       |       |       |              |    |
| 4.955708e-50 | 0.4558779  | 0.507 | 0.226 | 8.835532e-46 | 12 |
| CHCHD10      | DZ 3       |       |       |              |    |
| 5.835856e-50 | 0.3844894  | 0.763 | 0.487 | 1.040475e-45 | 12 |
| AP2M1        | DZ 3       |       |       |              |    |
| 6.48455e-50  | 0.3872091  | 0.91  | 0.697 | 1.15613e-45  | 12 |
| COMMD6       | DZ 3       |       |       |              |    |
| 7.697092e-50 | 0.4009236  | 0.773 | 0.523 | 1.372314e-45 | 12 |
| SRSF7        | DZ 3       |       |       |              |    |

|              |                |       |              |              |    |
|--------------|----------------|-------|--------------|--------------|----|
| 1.2331e-49   | -0.3616985     | 1     | 0.999        | 2.198495e-45 | 12 |
| RPL13A       | DZ 3           |       |              |              |    |
| 1.395922e-49 | 0.4370587      | 0.772 | 0.478        | 2.48879e-45  | 12 |
| GMFG         | DZ 3           |       |              |              |    |
| 2.267543e-49 | 0.4298475      | 0.645 | 0.353        | 4.042802e-45 | 12 |
| TKT          | DZ 3           |       |              |              |    |
| 3.15672e-49  | 0.4278525      | 0.476 | 0.212        | 5.628116e-45 | 12 |
| CHMP5        | DZ 3           |       |              |              |    |
| 3.341343e-49 | 0.3864385      | 0.257 | 0.065        | 5.95728e-45  | 12 |
| ZSCAN16-AS1  | DZ 3           |       |              |              |    |
| 4.590026e-49 | 0.3470388      | 0.231 | 0.054        | 8.183557e-45 | 12 |
| SLC15A4      | DZ 3           |       |              |              |    |
| 4.614783e-49 | 0.341214 0.781 | 0.49  | 8.227697e-45 | 12           |    |
| HSPE1        | DZ 3           |       |              |              |    |
| 4.929301e-49 | 0.3881098      | 0.208 | 0.042        | 8.788451e-45 | 12 |
| ASF1B        | DZ 3           |       |              |              |    |
| 5.106209e-49 | 0.3639342      | 0.268 | 0.074        | 9.10386e-45  | 12 |
| WEE1         | DZ 3           |       |              |              |    |
| 6.981295e-49 | 0.3807817      | 0.353 | 0.117        | 1.244695e-44 | 12 |
| RFC2         | DZ 3           |       |              |              |    |
| 1.113324e-48 | 0.3539443      | 0.873 | 0.663        | 1.984945e-44 | 12 |
| GDI2         | DZ 3           |       |              |              |    |
| 1.534063e-48 | 0.407599 0.434 | 0.18  | 2.73508e-44  | 12           |    |
| CLINT1       | DZ 3           |       |              |              |    |
| 1.581491e-48 | 0.3779481      | 0.756 | 0.488        | 2.819641e-44 | 12 |
| ARL6IP4      | DZ 3           |       |              |              |    |
| 1.680192e-48 | -0.77931 0.064 | 0.201 | 2.995614e-44 | 12           |    |
| YBX3         | DZ 3           |       |              |              |    |
| 1.719712e-48 | 0.3832228      | 0.273 | 0.07         | 3.066075e-44 | 12 |
| DNASE1       | DZ 3           |       |              |              |    |
| 2.11631e-48  | 0.4049575      | 0.324 | 0.111        | 3.77317e-44  | 12 |
| GOT2         | DZ 3           |       |              |              |    |
| 2.322778e-48 | 0.396761 0.574 | 0.295 | 4.141281e-44 | 12           |    |
| AHSA1        | DZ 3           |       |              |              |    |
| 2.332301e-48 | 0.402259 0.315 | 0.1   | 4.15826e-44  | 12           |    |
| ACSF3        | DZ 3           |       |              |              |    |
| 2.666423e-48 | -0.8686149     | 0.363 | 0.47         | 4.753966e-44 | 12 |
| ITM2B        | DZ 3           |       |              |              |    |
| 5.779726e-48 | 0.3801866      | 0.689 | 0.418        | 1.030467e-43 | 12 |
| BLOC1S1      | DZ 3           |       |              |              |    |
| 6.520975e-48 | 0.3534573      | 0.73  | 0.438        | 1.162625e-43 | 12 |
| PSMB7        | DZ 3           |       |              |              |    |
| 7.300673e-48 | -0.5765803     | 0.912 | 0.934        | 1.301637e-43 | 12 |
| MT-ATP6      | DZ 3           |       |              |              |    |
| 7.681544e-48 | 0.3788608      | 0.641 | 0.337        | 1.369542e-43 | 12 |
| PNN          | DZ 3           |       |              |              |    |
| 7.74769e-48  | 0.3601663      | 0.236 | 0.067        | 1.381336e-43 | 12 |
| NEK6         | DZ 3           |       |              |              |    |
| 7.897275e-48 | -0.6914719     | 0.057 | 0.187        | 1.408005e-43 | 12 |
| PLPP5        | DZ 3           |       |              |              |    |

|              |            |       |       |              |    |
|--------------|------------|-------|-------|--------------|----|
| 8.003003e-48 | 0.5023573  | 0.453 | 0.161 | 1.426855e-43 | 12 |
| CCDC88A      | DZ 3       |       |       |              |    |
| 9.531282e-48 | -0.6138734 | 0.031 | 0.152 | 1.699332e-43 | 12 |
| CELF2        | DZ 3       |       |       |              |    |
| 9.721064e-48 | 0.3571168  | 0.245 | 0.063 | 1.733168e-43 | 12 |
| MFHAS1       | DZ 3       |       |       |              |    |
| 1.009163e-47 | 0.3249471  | 0.171 | 0.031 | 1.799236e-43 | 12 |
| AL391069.3   | DZ 3       |       |       |              |    |
| 1.053568e-47 | 0.3917063  | 0.604 | 0.317 | 1.878406e-43 | 12 |
| NDUFB6       | DZ 3       |       |       |              |    |
| 1.207297e-47 | 0.3873743  | 0.299 | 0.094 | 2.15249e-43  | 12 |
| PCBD1        | DZ 3       |       |       |              |    |
| 1.567257e-47 | 0.3200841  | 0.821 | 0.573 | 2.794263e-43 | 12 |
| C11orf58     | DZ 3       |       |       |              |    |
| 2.089095e-47 | -0.911282  | 0.215 | 0.341 | 3.724647e-43 | 12 |
| HVCN1        | DZ 3       |       |       |              |    |
| 2.460235e-47 | 0.4012357  | 0.385 | 0.145 | 4.386352e-43 | 12 |
| HDGF         | DZ 3       |       |       |              |    |
| 3.060249e-47 | 0.3067494  | 0.832 | 0.562 | 5.456119e-43 | 12 |
| PCBP2        | DZ 3       |       |       |              |    |
| 4.079423e-47 | 0.3889856  | 0.437 | 0.18  | 7.273204e-43 | 12 |
| SNRPA        | DZ 3       |       |       |              |    |
| 6.690988e-47 | 0.3830822  | 0.566 | 0.256 | 1.192936e-42 | 12 |
| CD22         | DZ 3       |       |       |              |    |
| 8.783038e-47 | 0.3981661  | 0.299 | 0.049 | 1.565928e-42 | 12 |
| UBE2C        | DZ 3       |       |       |              |    |
| 9.550323e-47 | 0.3856809  | 0.709 | 0.433 | 1.702727e-42 | 12 |
| AURKAIP1     | DZ 3       |       |       |              |    |
| 9.761703e-47 | 0.3474594  | 0.28  | 0.077 | 1.740414e-42 | 12 |
| RFC4         | DZ 3       |       |       |              |    |
| 1.075077e-46 | 0.3075222  | 0.942 | 0.802 | 1.916756e-42 | 12 |
| HINT1        | DZ 3       |       |       |              |    |
| 1.928827e-46 | 0.3894566  | 0.495 | 0.229 | 3.438906e-42 | 12 |
| UFD1         | DZ 3       |       |       |              |    |
| 2.351395e-46 | 0.3628699  | 0.555 | 0.272 | 4.192303e-42 | 12 |
| VBP1         | DZ 3       |       |       |              |    |
| 2.443764e-46 | 0.3810675  | 0.612 | 0.326 | 4.356986e-42 | 12 |
| BAX          | DZ 3       |       |       |              |    |
| 2.611308e-46 | 0.3995066  | 0.439 | 0.193 | 4.6557e-42   | 12 |
| NDUFA7       | DZ 3       |       |       |              |    |
| 2.980123e-46 | 0.3974226  | 0.193 | 0.037 | 5.313262e-42 | 12 |
| NUF2         | DZ 3       |       |       |              |    |
| 3.077255e-46 | -0.4900519 | 0.935 | 0.96  | 5.486438e-42 | 12 |
| MT-CYB       | DZ 3       |       |       |              |    |
| 3.428462e-46 | 0.4088186  | 0.808 | 0.508 | 6.112605e-42 | 12 |
| LSP1         | DZ 3       |       |       |              |    |
| 3.751768e-46 | 0.3648442  | 0.658 | 0.372 | 6.689027e-42 | 12 |
| VDAC2        | DZ 3       |       |       |              |    |
| 4.939466e-46 | -0.4771896 | 0.99  | 0.991 | 8.806574e-42 | 12 |
| RPL9         | DZ 3       |       |       |              |    |

|              |                |       |              |              |    |
|--------------|----------------|-------|--------------|--------------|----|
| 6.061885e-46 | 0.4257125      | 0.548 | 0.264        | 1.080773e-41 | 12 |
| SMS          | DZ 3           |       |              |              |    |
| 7.487282e-46 | -0.6641822     | 0.045 | 0.167        | 1.334908e-41 | 12 |
| MARCKS       | DZ 3           |       |              |              |    |
| 8.034603e-46 | 0.3707667      | 0.285 | 0.086        | 1.432489e-41 | 12 |
| XPNPEP1      | DZ 3           |       |              |              |    |
| 8.500516e-46 | -0.8094972     | 0.323 | 0.441        | 1.515557e-41 | 12 |
| IL2RG        | DZ 3           |       |              |              |    |
| 1.056636e-45 | -0.6681545     | 0.023 | 0.14         | 1.883876e-41 | 12 |
| FCER2        | DZ 3           |       |              |              |    |
| 1.30665e-45  | 0.32605 0.79   | 0.529 | 2.329626e-41 | 12           |    |
| CAP1         | DZ 3           |       |              |              |    |
| 1.386675e-45 | 0.3498029      | 0.304 | 0.095        | 2.472304e-41 | 12 |
| RMDN1        | DZ 3           |       |              |              |    |
| 1.480058e-45 | 0.3871017      | 0.406 | 0.163        | 2.638796e-41 | 12 |
| MTX1         | DZ 3           |       |              |              |    |
| 1.755452e-45 | 0.3918456      | 0.485 | 0.208        | 3.129796e-41 | 12 |
| DMAC1        | DZ 3           |       |              |              |    |
| 2.272883e-45 | 0.3647509      | 0.321 | 0.101        | 4.052324e-41 | 12 |
| IMMP1L       | DZ 3           |       |              |              |    |
| 2.441453e-45 | 0.3854162      | 0.664 | 0.389        | 4.352866e-41 | 12 |
| ATP5PD       | DZ 3           |       |              |              |    |
| 2.463528e-45 | 0.4285165      | 0.5   | 0.226        | 4.392225e-41 | 12 |
| ZNF581       | DZ 3           |       |              |              |    |
| 4.272852e-45 | 0.4193693      | 0.497 | 0.235        | 7.618067e-41 | 12 |
| PPP1CB       | DZ 3           |       |              |              |    |
| 6.769096e-45 | 0.3615067      | 0.597 | 0.298        | 1.206862e-40 | 12 |
| OCIAD2       | DZ 3           |       |              |              |    |
| 8.099589e-45 | 0.3775538      | 0.246 | 0.066        | 1.444076e-40 | 12 |
| RPRD1B       | DZ 3           |       |              |              |    |
| 9.42658e-45  | 0.3851257      | 0.489 | 0.22         | 1.680665e-40 | 12 |
| PLEKHJ1      | DZ 3           |       |              |              |    |
| 1.020019e-44 | 0.4196602      | 0.606 | 0.342        | 1.818591e-40 | 12 |
| NASP         | DZ 3           |       |              |              |    |
| 1.182982e-44 | 0.3223932      | 0.967 | 0.937        | 2.109139e-40 | 12 |
| EEF2         | DZ 3           |       |              |              |    |
| 1.457351e-44 | 0.3873129      | 0.511 | 0.232        | 2.598312e-40 | 12 |
| CDC26        | DZ 3           |       |              |              |    |
| 1.580629e-44 | 0.3840968      | 0.392 | 0.155        | 2.818104e-40 | 12 |
| DNAJC9       | DZ 3           |       |              |              |    |
| 1.618609e-44 | 0.3908218      | 0.637 | 0.358        | 2.885818e-40 | 12 |
| VPS29        | DZ 3           |       |              |              |    |
| 2.174791e-44 | 0.4049479      | 0.357 | 0.125        | 3.877434e-40 | 12 |
| KMT2A        | DZ 3           |       |              |              |    |
| 2.609147e-44 | 0.446969 0.287 | 0.09  | 4.651848e-40 | 12           |    |
| RNGTT        | DZ 3           |       |              |              |    |
| 3.237893e-44 | 0.3613035      | 0.461 | 0.192        | 5.772839e-40 | 12 |
| NUDCD2       | DZ 3           |       |              |              |    |
| 4.027352e-44 | 0.3674 0.384   | 0.14  | 7.180367e-40 | 12           |    |
| P2RY8        | DZ 3           |       |              |              |    |

|              |            |       |       |              |    |
|--------------|------------|-------|-------|--------------|----|
| 5.269581e-44 | 0.3899633  | 0.517 | 0.233 | 9.395136e-40 | 12 |
| MCUB         | DZ 3       |       |       |              |    |
| 5.345087e-44 | 0.4214637  | 0.362 | 0.124 | 9.529756e-40 | 12 |
| STIM2        | DZ 3       |       |       |              |    |
| 5.460181e-44 | 0.3679336  | 0.657 | 0.332 | 9.734956e-40 | 12 |
| LRMP         | DZ 3       |       |       |              |    |
| 5.765663e-44 | 0.3908547  | 0.406 | 0.155 | 1.02796e-39  | 12 |
| UBE2R2       | DZ 3       |       |       |              |    |
| 5.966538e-44 | 0.3815349  | 0.524 | 0.256 | 1.063774e-39 | 12 |
| HSPB11       | DZ 3       |       |       |              |    |
| 7.875243e-44 | 0.3662471  | 0.615 | 0.313 | 1.404077e-39 | 12 |
| IGBP1        | DZ 3       |       |       |              |    |
| 7.99899e-44  | 0.3900732  | 0.715 | 0.418 | 1.42614e-39  | 12 |
| TAF7         | DZ 3       |       |       |              |    |
| 8.947816e-44 | 0.3595439  | 0.581 | 0.302 | 1.595306e-39 | 12 |
| PSMD6        | DZ 3       |       |       |              |    |
| 9.646073e-44 | -0.7888074 | 0.22  | 0.332 | 1.719798e-39 | 12 |
| SMC6         | DZ 3       |       |       |              |    |
| 1.07637e-43  | 0.3951885  | 0.443 | 0.183 | 1.919061e-39 | 12 |
| NUDT21       | DZ 3       |       |       |              |    |
| 1.24263e-43  | 0.3065096  | 0.898 | 0.715 | 2.215485e-39 | 12 |
| EIF3F        | DZ 3       |       |       |              |    |
| 1.435144e-43 | 0.3831633  | 0.54  | 0.265 | 2.558718e-39 | 12 |
| POLR2F       | DZ 3       |       |       |              |    |
| 1.724131e-43 | 0.3783328  | 0.488 | 0.212 | 3.073953e-39 | 12 |
| GNAI2        | DZ 3       |       |       |              |    |
| 1.862163e-43 | 0.3096766  | 0.184 | 0.037 | 3.32005e-39  | 12 |
| SLC30A4      | DZ 3       |       |       |              |    |
| 2.011881e-43 | 0.4168176  | 0.513 | 0.246 | 3.586982e-39 | 12 |
| RGS10        | DZ 3       |       |       |              |    |
| 2.220402e-43 | 0.3800538  | 0.441 | 0.184 | 3.958755e-39 | 12 |
| NDUFA8       | DZ 3       |       |       |              |    |
| 2.460022e-43 | 0.3747295  | 0.436 | 0.175 | 4.385972e-39 | 12 |
| RASGRP3      | DZ 3       |       |       |              |    |
| 2.69431e-43  | 0.3618424  | 0.597 | 0.281 | 4.803685e-39 | 12 |
| DCK          | DZ 3       |       |       |              |    |
| 3.053091e-43 | 0.3414332  | 0.294 | 0.089 | 5.443356e-39 | 12 |
| TXLNG        | DZ 3       |       |       |              |    |
| 3.288848e-43 | 0.3667802  | 0.312 | 0.105 | 5.863687e-39 | 12 |
| PTS          | DZ 3       |       |       |              |    |
| 3.519559e-43 | 0.3067285  | 0.191 | 0.043 | 6.275022e-39 | 12 |
| CENPN        | DZ 3       |       |       |              |    |
| 4.479119e-43 | 0.3335324  | 0.677 | 0.372 | 7.985821e-39 | 12 |
| POLR2G       | DZ 3       |       |       |              |    |
| 4.782607e-43 | 0.4402428  | 0.488 | 0.22  | 8.52691e-39  | 12 |
| NSMCE1       | DZ 3       |       |       |              |    |
| 5.994171e-43 | 0.3608689  | 0.262 | 0.073 | 1.068701e-38 | 12 |
| KLHL6        | DZ 3       |       |       |              |    |
| 8.988047e-43 | 0.3392562  | 0.761 | 0.496 | 1.602479e-38 | 12 |
| NDUFA11      | DZ 3       |       |       |              |    |

|              |                |       |              |              |    |
|--------------|----------------|-------|--------------|--------------|----|
| 9.424348e-43 | 0.3392391      | 0.239 | 0.063        | 1.680267e-38 | 12 |
| ST20         | DZ 3           |       |              |              |    |
| 1.145261e-42 | 0.3475368      | 0.25  | 0.062        | 2.041886e-38 | 12 |
| FAM200B      | DZ 3           |       |              |              |    |
| 1.268183e-42 | 0.4320546      | 0.49  | 0.234        | 2.261043e-38 | 12 |
| NSRP1        | DZ 3           |       |              |              |    |
| 1.622707e-42 | 0.3441083      | 0.231 | 0.058        | 2.893125e-38 | 12 |
| FANCA        | DZ 3           |       |              |              |    |
| 1.910999e-42 | 0.340965 0.686 | 0.403 | 3.407121e-38 | 12           |    |
| EID1         | DZ 3           |       |              |              |    |
| 2.948699e-42 | 0.3974278      | 0.558 | 0.282        | 5.257236e-38 | 12 |
| RRAS2        | DZ 3           |       |              |              |    |
| 3.547036e-42 | 0.3273477      | 0.513 | 0.264        | 6.32401e-38  | 12 |
| TIMM10       | DZ 3           |       |              |              |    |
| 3.808355e-42 | -0.8061099     | 0.501 | 0.572        | 6.789915e-38 | 12 |
| SNX2         | DZ 3           |       |              |              |    |
| 3.900077e-42 | 0.3484408      | 0.518 | 0.25         | 6.953447e-38 | 12 |
| C1D          | DZ 3           |       |              |              |    |
| 6.129291e-42 | 0.3539308      | 0.533 | 0.258        | 1.092791e-37 | 12 |
| MTCH2        | DZ 3           |       |              |              |    |
| 6.275156e-42 | 0.3852752      | 0.679 | 0.39         | 1.118798e-37 | 12 |
| ORAI2        | DZ 3           |       |              |              |    |
| 6.987102e-42 | -0.7720818     | 0.136 | 0.241        | 1.24573e-37  | 12 |
| CD55         | DZ 3           |       |              |              |    |
| 8.155733e-42 | 0.3566877      | 0.538 | 0.269        | 1.454086e-37 | 12 |
| TMEM14B      | DZ 3           |       |              |              |    |
| 8.895742e-42 | 0.3452392      | 0.302 | 0.094        | 1.586022e-37 | 12 |
| GON7         | DZ 3           |       |              |              |    |
| 9.264846e-42 | 0.3264017      | 0.7   | 0.412        | 1.651829e-37 | 12 |
| TOMM22       | DZ 3           |       |              |              |    |
| 1.032002e-41 | 0.326739 0.684 | 0.4   | 1.839957e-37 | 12           |    |
| BANF1        | DZ 3           |       |              |              |    |
| 1.141661e-41 | 0.331616 0.265 | 0.078 | 2.035468e-37 | 12           |    |
| EPN1         | DZ 3           |       |              |              |    |
| 1.297726e-41 | 0.3376618      | 0.551 | 0.265        | 2.313716e-37 | 12 |
| CAMTA1       | DZ 3           |       |              |              |    |
| 1.458016e-41 | -0.6432451     | 0.043 | 0.161        | 2.599497e-37 | 12 |
| SLC2A3       | DZ 3           |       |              |              |    |
| 1.507162e-41 | -0.7742387     | 0.71  | 0.759        | 2.687119e-37 | 12 |
| MT-ND5       | DZ 3           |       |              |              |    |
| 2.008499e-41 | 0.3560249      | 0.596 | 0.319        | 3.580952e-37 | 12 |
| MRPS36       | DZ 3           |       |              |              |    |
| 2.019988e-41 | 0.386151 0.399 | 0.137 | 3.601436e-37 | 12           |    |
| HSH2D        | DZ 3           |       |              |              |    |
| 3.026912e-41 | 0.3508084      | 0.314 | 0.103        | 5.396681e-37 | 12 |
| OGG1         | DZ 3           |       |              |              |    |
| 4.156879e-41 | 0.3353151      | 0.557 | 0.297        | 7.411299e-37 | 12 |
| GLRX3        | DZ 3           |       |              |              |    |
| 5.968254e-41 | 0.3753826      | 0.347 | 0.115        | 1.06408e-36  | 12 |
| LPP          | DZ 3           |       |              |              |    |

|              |                |       |              |              |    |
|--------------|----------------|-------|--------------|--------------|----|
| 6.406918e-41 | 0.3512906      | 0.688 | 0.415        | 1.142289e-36 | 12 |
| ECH1         | DZ 3           |       |              |              |    |
| 8.559033e-41 | 0.3595405      | 0.424 | 0.182        | 1.52599e-36  | 12 |
| RUVBL2       | DZ 3           |       |              |              |    |
| 9.02027e-41  | 0.3164415      | 0.821 | 0.578        | 1.608224e-36 | 12 |
| NDUFB2       | DZ 3           |       |              |              |    |
| 1.109587e-40 | 0.3602298      | 0.621 | 0.348        | 1.978283e-36 | 12 |
| AP2S1        | DZ 3           |       |              |              |    |
| 1.578507e-40 | 0.3229197      | 0.767 | 0.519        | 2.814321e-36 | 12 |
| VAMP8        | DZ 3           |       |              |              |    |
| 1.970078e-40 | 0.3450022      | 0.427 | 0.174        | 3.512453e-36 | 12 |
| TAF12        | DZ 3           |       |              |              |    |
| 2.120948e-40 | -0.8078612     | 0.413 | 0.496        | 3.781438e-36 | 12 |
| SP100        | DZ 3           |       |              |              |    |
| 2.305859e-40 | 0.3521844      | 0.62  | 0.361        | 4.111115e-36 | 12 |
| CACYBP       | DZ 3           |       |              |              |    |
| 2.960781e-40 | 0.3701008      | 0.64  | 0.358        | 5.278777e-36 | 12 |
| TERF2IP      | DZ 3           |       |              |              |    |
| 3.044423e-40 | 0.3701342      | 0.354 | 0.131        | 5.427902e-36 | 12 |
| CLIC4        | DZ 3           |       |              |              |    |
| 3.123934e-40 | 0.3249666      | 0.313 | 0.111        | 5.569662e-36 | 12 |
| CPSF3        | DZ 3           |       |              |              |    |
| 3.302629e-40 | 0.337331 0.554 | 0.281 | 5.888256e-36 | 12           |    |
| WTAP         | DZ 3           |       |              |              |    |
| 5.474805e-40 | 0.3297547      | 0.158 | 0.033        | 9.761029e-36 | 12 |
| PBK          | DZ 3           |       |              |              |    |
| 9.799505e-40 | 0.3284722      | 0.245 | 0.077        | 1.747154e-35 | 12 |
| PDZD11       | DZ 3           |       |              |              |    |
| 9.872793e-40 | 0.3338528      | 0.611 | 0.314        | 1.76022e-35  | 12 |
| GNB2         | DZ 3           |       |              |              |    |
| 1.380426e-39 | 0.3662676      | 0.356 | 0.132        | 2.461162e-35 | 12 |
| RPA1         | DZ 3           |       |              |              |    |
| 1.537195e-39 | 0.3458475      | 0.495 | 0.24         | 2.740665e-35 | 12 |
| MRPL9        | DZ 3           |       |              |              |    |
| 1.569337e-39 | 0.3244139      | 0.275 | 0.088        | 2.797971e-35 | 12 |
| RTCA         | DZ 3           |       |              |              |    |
| 1.601079e-39 | 0.3622068      | 0.396 | 0.171        | 2.854564e-35 | 12 |
| LAP3         | DZ 3           |       |              |              |    |
| 1.6709e-39   | 0.3572715      | 0.492 | 0.228        | 2.979048e-35 | 12 |
| PIN1         | DZ 3           |       |              |              |    |
| 1.712544e-39 | -0.3286963     | 0.999 | 0.999        | 3.053295e-35 | 12 |
| RPS19        | DZ 3           |       |              |              |    |
| 1.957484e-39 | 0.3610243      | 0.566 | 0.287        | 3.489998e-35 | 12 |
| DYNLRB1      | DZ 3           |       |              |              |    |
| 2.145863e-39 | -0.404297      | 1     | 0.999        | 3.82586e-35  | 12 |
| RPL39        | DZ 3           |       |              |              |    |
| 3.049756e-39 | 0.3484935      | 0.343 | 0.125        | 5.43741e-35  | 12 |
| MAGEF1       | DZ 3           |       |              |              |    |
| 3.139329e-39 | 0.3696447      | 0.457 | 0.217        | 5.597109e-35 | 12 |
| HSPH1        | DZ 3           |       |              |              |    |



|              |                |       |              |              |    |
|--------------|----------------|-------|--------------|--------------|----|
| 4.494616e-39 | 0.3246193      | 0.545 | 0.27         | 8.013451e-35 | 12 |
| CCNG1        | DZ 3           |       |              |              |    |
| 5.763477e-39 | 0.3186378      | 0.685 | 0.386        | 1.02757e-34  | 12 |
| SYPL1        | DZ 3           |       |              |              |    |
| 5.781144e-39 | 0.3228283      | 0.503 | 0.243        | 1.03072e-34  | 12 |
| NAP1L4       | DZ 3           |       |              |              |    |
| 5.872827e-39 | 0.4309054      | 0.626 | 0.33         | 1.047066e-34 | 12 |
| SPIB         | DZ 3           |       |              |              |    |
| 6.401697e-39 | 0.3645235      | 0.383 | 0.16         | 1.141359e-34 | 12 |
| COX11        | DZ 3           |       |              |              |    |
| 7.99459e-39  | 0.3702703      | 0.762 | 0.484        | 1.425355e-34 | 12 |
| RAC2         | DZ 3           |       |              |              |    |
| 1.072228e-38 | -0.7713423     | 0.121 | 0.24         | 1.911675e-34 | 12 |
| CAPG         | DZ 3           |       |              |              |    |
| 1.749838e-38 | 0.3196232      | 0.236 | 0.068        | 3.119786e-34 | 12 |
| HAUS8        | DZ 3           |       |              |              |    |
| 1.768491e-38 | 0.3266092      | 0.459 | 0.222        | 3.153043e-34 | 12 |
| DEGS1        | DZ 3           |       |              |              |    |
| 1.888441e-38 | -0.4072803     | 1     | 0.999        | 3.366902e-34 | 12 |
| EEF1A1       | DZ 3           |       |              |              |    |
| 1.904258e-38 | 0.382472 0.334 | 0.122 | 3.395102e-34 | 12           |    |
| MSI2         | DZ 3           |       |              |              |    |
| 1.93837e-38  | 0.3205669      | 0.609 | 0.342        | 3.455921e-34 | 12 |
| CYC1         | DZ 3           |       |              |              |    |
| 2.236307e-38 | -0.7155783     | 0.044 | 0.161        | 3.987112e-34 | 12 |
| LMNA         | DZ 3           |       |              |              |    |
| 2.717386e-38 | 0.3246964      | 0.394 | 0.165        | 4.844827e-34 | 12 |
| EED          | DZ 3           |       |              |              |    |
| 3.044303e-38 | 0.3288818      | 0.43  | 0.184        | 5.427688e-34 | 12 |
| MAP2K1       | DZ 3           |       |              |              |    |
| 4.593553e-38 | 0.3328983      | 0.55  | 0.28         | 8.189846e-34 | 12 |
| NDUFB5       | DZ 3           |       |              |              |    |
| 4.751173e-38 | 0.3911843      | 0.214 | 0.04         | 8.470866e-34 | 12 |
| RRM2         | DZ 3           |       |              |              |    |
| 5.755657e-38 | 0.3245611      | 0.916 | 0.803        | 1.026176e-33 | 12 |
| CALM2        | DZ 3           |       |              |              |    |
| 6.033409e-38 | 0.3298534      | 0.706 | 0.438        | 1.075697e-33 | 12 |
| NDUFB10      | DZ 3           |       |              |              |    |
| 6.139139e-38 | 0.3876101      | 0.583 | 0.322        | 1.094547e-33 | 12 |
| HNRNPH1      | DZ 3           |       |              |              |    |
| 6.363933e-38 | 0.3329694      | 0.272 | 0.09         | 1.134626e-33 | 12 |
| RNF8         | DZ 3           |       |              |              |    |
| 7.924853e-38 | -0.743787      | 0.852 | 0.855        | 1.412922e-33 | 12 |
| SH3BGR1      | DZ 3           |       |              |              |    |
| 8.29813e-38  | -0.6830705     | 0.117 | 0.245        | 1.479474e-33 | 12 |
| PHACTR1      | DZ 3           |       |              |              |    |
| 9.499289e-38 | 0.3629986      | 0.337 | 0.126        | 1.693628e-33 | 12 |
| C16orf87     | DZ 3           |       |              |              |    |
| 1.817661e-37 | 0.3096547      | 0.947 | 0.881        | 3.240709e-33 | 12 |
| H3F3B        | DZ 3           |       |              |              |    |

|              |            |       |       |              |    |
|--------------|------------|-------|-------|--------------|----|
| 2.661615e-37 | 0.3469687  | 0.529 | 0.247 | 4.745393e-33 | 12 |
| ZCCHC10      | DZ 3       |       |       |              |    |
| 2.89687e-37  | 0.3297191  | 0.399 | 0.165 | 5.16483e-33  | 12 |
| COMMD7       | DZ 3       |       |       |              |    |
| 3.32476e-37  | 0.3403898  | 0.521 | 0.255 | 5.927715e-33 | 12 |
| ATXN10       | DZ 3       |       |       |              |    |
| 3.337523e-37 | 0.3281249  | 0.588 | 0.311 | 5.95047e-33  | 12 |
| SMIM26       | DZ 3       |       |       |              |    |
| 3.346761e-37 | 0.3349878  | 0.518 | 0.259 | 5.96694e-33  | 12 |
| RAB5IF       | DZ 3       |       |       |              |    |
| 3.678969e-37 | 0.3225545  | 0.219 | 0.063 | 6.559234e-33 | 12 |
| TEX9         | DZ 3       |       |       |              |    |
| 5.088018e-37 | 0.3436777  | 0.367 | 0.147 | 9.071428e-33 | 12 |
| UBA1         | DZ 3       |       |       |              |    |
| 5.17065e-37  | 0.3353904  | 0.363 | 0.136 | 9.218751e-33 | 12 |
| CUL3         | DZ 3       |       |       |              |    |
| 5.780594e-37 | 0.3289921  | 0.308 | 0.112 | 1.030622e-32 | 12 |
| ACYP2        | DZ 3       |       |       |              |    |
| 8.801176e-37 | 0.3568434  | 0.198 | 0.043 | 1.569162e-32 | 12 |
| HMMR         | DZ 3       |       |       |              |    |
| 1.521685e-36 | 0.3219808  | 0.457 | 0.207 | 2.713012e-32 | 12 |
| FAM192A      | DZ 3       |       |       |              |    |
| 2.006999e-36 | 0.3194158  | 0.276 | 0.093 | 3.578279e-32 | 12 |
| PHF19        | DZ 3       |       |       |              |    |
| 2.671742e-36 | -0.694534  | 0.234 | 0.351 | 4.763449e-32 | 12 |
| LITAF        | DZ 3       |       |       |              |    |
| 3.094056e-36 | 0.3632325  | 0.342 | 0.123 | 5.516392e-32 | 12 |
| ETS1         | DZ 3       |       |       |              |    |
| 3.096734e-36 | -0.4032706 | 0.999 | 0.998 | 5.521166e-32 | 12 |
| RPL11        | DZ 3       |       |       |              |    |
| 4.080598e-36 | 0.3551295  | 0.285 | 0.098 | 7.275298e-32 | 12 |
| ALDH2        | DZ 3       |       |       |              |    |
| 4.857026e-36 | 0.3147852  | 0.413 | 0.197 | 8.659592e-32 | 12 |
| MRPL23       | DZ 3       |       |       |              |    |
| 5.007567e-36 | 0.3660574  | 0.514 | 0.27  | 8.927991e-32 | 12 |
| ATOX1        | DZ 3       |       |       |              |    |
| 5.862838e-36 | 0.303294   | 0.234 | 0.077 | 1.045285e-31 | 12 |
| GPR160       | DZ 3       |       |       |              |    |
| 7.123773e-36 | 0.3161121  | 0.263 | 0.087 | 1.270097e-31 | 12 |
| FUNDC1       | DZ 3       |       |       |              |    |
| 8.61774e-36  | -0.6947742 | 0.099 | 0.213 | 1.536457e-31 | 12 |
| MGST3        | DZ 3       |       |       |              |    |
| 1.287516e-35 | 0.3203878  | 0.613 | 0.339 | 2.295513e-31 | 12 |
| UBE2A        | DZ 3       |       |       |              |    |
| 1.473631e-35 | 0.3271365  | 0.514 | 0.256 | 2.627337e-31 | 12 |
| TRAPPC3      | DZ 3       |       |       |              |    |
| 1.566002e-35 | 0.3720111  | 0.493 | 0.24  | 2.792024e-31 | 12 |
| CKS1B        | DZ 3       |       |       |              |    |
| 1.665683e-35 | 0.4889804  | 0.748 | 0.491 | 2.969747e-31 | 12 |
| SAT1         | DZ 3       |       |       |              |    |

|              |                |       |              |              |    |
|--------------|----------------|-------|--------------|--------------|----|
| 1.854368e-35 | 0.3059666      | 0.273 | 0.1          | 3.306152e-31 | 12 |
| SLC25A4      | DZ 3           |       |              |              |    |
| 2.034063e-35 | 0.3066785      | 0.385 | 0.159        | 3.62653e-31  | 12 |
| SAE1         | DZ 3           |       |              |              |    |
| 2.077014e-35 | 0.3680897      | 0.661 | 0.395        | 3.703109e-31 | 12 |
| RPL22L1      | DZ 3           |       |              |              |    |
| 2.900883e-35 | 0.3300177      | 0.498 | 0.245        | 5.171984e-31 | 12 |
| MCTS1        | DZ 3           |       |              |              |    |
| 2.963664e-35 | -0.6967937     | 0.409 | 0.48         | 5.283917e-31 | 12 |
| CD47         | DZ 3           |       |              |              |    |
| 3.377051e-35 | 0.344624 0.43  | 0.189 | 6.020944e-31 | 12           |    |
| USP34        | DZ 3           |       |              |              |    |
| 3.450937e-35 | 0.3138299      | 0.215 | 0.059        | 6.152676e-31 | 12 |
| PITPNC1      | DZ 3           |       |              |              |    |
| 3.609076e-35 | 0.3218511      | 0.476 | 0.242        | 6.434622e-31 | 12 |
| HAT1         | DZ 3           |       |              |              |    |
| 3.850318e-35 | 0.3355715      | 0.585 | 0.319        | 6.864732e-31 | 12 |
| SNRNP70      | DZ 3           |       |              |              |    |
| 4.058061e-35 | 0.3084623      | 0.337 | 0.125        | 7.235117e-31 | 12 |
| NCBP2-AS2    | DZ 3           |       |              |              |    |
| 6.756036e-35 | 0.3628238      | 0.385 | 0.157        | 1.204534e-30 | 12 |
| LYPLAL1      | DZ 3           |       |              |              |    |
| 7.084077e-35 | 0.3684295      | 0.44  | 0.204        | 1.26302e-30  | 12 |
| EHD1         | DZ 3           |       |              |              |    |
| 7.691344e-35 | 0.3074113      | 0.359 | 0.147        | 1.37129e-30  | 12 |
| BCCIP        | DZ 3           |       |              |              |    |
| 7.980641e-35 | 0.3051974      | 0.319 | 0.116        | 1.422868e-30 | 12 |
| CFAP20       | DZ 3           |       |              |              |    |
| 9.102869e-35 | 0.309421 0.313 | 0.108 | 1.622951e-30 | 12           |    |
| ZNF296       | DZ 3           |       |              |              |    |
| 9.279489e-35 | 0.3188812      | 0.361 | 0.148        | 1.65444e-30  | 12 |
| PPIH         | DZ 3           |       |              |              |    |
| 1.210688e-34 | 0.317439 0.129 | 0.025 | 2.158535e-30 | 12           |    |
| DLGAP5       | DZ 3           |       |              |              |    |
| 1.242983e-34 | 0.3134423      | 0.627 | 0.349        | 2.216115e-30 | 12 |
| RAB11A       | DZ 3           |       |              |              |    |
| 1.45737e-34  | 0.3766945      | 0.385 | 0.153        | 2.598345e-30 | 12 |
| KIAA0040     | DZ 3           |       |              |              |    |
| 1.983213e-34 | 0.328095 0.36  | 0.145 | 3.53587e-30  | 12           |    |
| COA6         | DZ 3           |       |              |              |    |
| 2.532988e-34 | 0.319153 0.272 | 0.095 | 4.516065e-30 | 12           |    |
| PPP1R35      | DZ 3           |       |              |              |    |
| 3.346026e-34 | 0.3140173      | 0.261 | 0.088        | 5.96563e-30  | 12 |
| FAM208B      | DZ 3           |       |              |              |    |
| 3.516753e-34 | 0.3473662      | 0.453 | 0.221        | 6.270019e-30 | 12 |
| ADI1         | DZ 3           |       |              |              |    |
| 3.958099e-34 | 0.3063171      | 0.307 | 0.107        | 7.056896e-30 | 12 |
| HPS1         | DZ 3           |       |              |              |    |
| 4.50507e-34  | 0.302129 0.23  | 0.071 | 8.032089e-30 | 12           |    |
| CUX1         | DZ 3           |       |              |              |    |

|              |                |       |              |              |    |
|--------------|----------------|-------|--------------|--------------|----|
| 4.811133e-34 | 0.3098803      | 0.603 | 0.326        | 8.577769e-30 | 12 |
| DARS         | DZ 3           |       |              |              |    |
| 4.87724e-34  | 0.3462737      | 0.474 | 0.237        | 8.695632e-30 | 12 |
| KPNA2        | DZ 3           |       |              |              |    |
| 5.290276e-34 | 0.3599333      | 0.315 | 0.119        | 9.432033e-30 | 12 |
| DLAT         | DZ 3           |       |              |              |    |
| 5.711329e-34 | 0.3235879      | 0.311 | 0.105        | 1.018273e-29 | 12 |
| MOB3A        | DZ 3           |       |              |              |    |
| 6.006085e-34 | 0.317496 0.348 | 0.141 | 1.070825e-29 | 12           |    |
| ANKRD13A     | DZ 3           |       |              |              |    |
| 6.618898e-34 | 0.3109937      | 0.451 | 0.209        | 1.180083e-29 | 12 |
| RAB1A        | DZ 3           |       |              |              |    |
| 6.899916e-34 | 0.3389149      | 0.408 | 0.177        | 1.230186e-29 | 12 |
| TRABD        | DZ 3           |       |              |              |    |
| 1.016858e-33 | 0.3414177      | 0.494 | 0.259        | 1.812956e-29 | 12 |
| MRPL41       | DZ 3           |       |              |              |    |
| 1.075949e-33 | 0.3217337      | 0.595 | 0.289        | 1.91831e-29  | 12 |
| GGA2         | DZ 3           |       |              |              |    |
| 1.101734e-33 | 0.3086402      | 0.344 | 0.134        | 1.964281e-29 | 12 |
| C22orf39     | DZ 3           |       |              |              |    |
| 1.129399e-33 | 0.310977 0.437 | 0.195 | 2.013606e-29 | 12           |    |
| CHCHD1       | DZ 3           |       |              |              |    |
| 1.218931e-33 | 0.3031716      | 0.513 | 0.259        | 2.173232e-29 | 12 |
| PDCD2        | DZ 3           |       |              |              |    |
| 1.314378e-33 | -0.3437705     | 0.996 | 0.996        | 2.343404e-29 | 12 |
| RPL35A       | DZ 3           |       |              |              |    |
| 1.750748e-33 | 0.3035137      | 0.44  | 0.202        | 3.121409e-29 | 12 |
| PRPF38A      | DZ 3           |       |              |              |    |
| 2.009305e-33 | 0.3216474      | 0.615 | 0.351        | 3.58239e-29  | 12 |
| POLR1D       | DZ 3           |       |              |              |    |
| 2.059441e-33 | 0.5407182      | 0.402 | 0.201        | 3.671777e-29 | 12 |
| LGALS1       | DZ 3           |       |              |              |    |
| 2.509348e-33 | -0.6600488     | 0.394 | 0.478        | 4.473916e-29 | 12 |
| N4BP2L2      | DZ 3           |       |              |              |    |
| 2.93843e-33  | -0.6272756     | 0.142 | 0.244        | 5.238926e-29 | 12 |
| HLA-F        | DZ 3           |       |              |              |    |
| 3.33292e-33  | 0.321083 0.529 | 0.272 | 5.942263e-29 | 12           |    |
| CNIH1        | DZ 3           |       |              |              |    |
| 3.819138e-33 | -0.5305221     | 0.066 | 0.16         | 6.809141e-29 | 12 |
| TGIF1        | DZ 3           |       |              |              |    |
| 5.286397e-33 | 0.349597 0.276 | 0.086 | 9.425117e-29 | 12           |    |
| GCSAM        | DZ 3           |       |              |              |    |
| 7.263443e-33 | -0.5671448     | 0.866 | 0.868        | 1.294999e-28 | 12 |
| CD52         | DZ 3           |       |              |              |    |
| 8.330312e-33 | -0.6891262     | 0.311 | 0.39         | 1.485211e-28 | 12 |
| EVI2B        | DZ 3           |       |              |              |    |
| 8.417394e-33 | 0.3072352      | 0.56  | 0.307        | 1.500737e-28 | 12 |
| ZNF207       | DZ 3           |       |              |              |    |
| 9.603103e-33 | 0.3243136      | 0.322 | 0.109        | 1.712137e-28 | 12 |
| HDAC7        | DZ 3           |       |              |              |    |

|              |                |       |              |              |    |
|--------------|----------------|-------|--------------|--------------|----|
| 1.11757e-32  | 0.3175367      | 0.357 | 0.151        | 1.992515e-28 | 12 |
| VPS25        | DZ 3           |       |              |              |    |
| 1.215404e-32 | 0.3093622      | 0.412 | 0.18         | 2.166944e-28 | 12 |
| COPS8        | DZ 3           |       |              |              |    |
| 1.398605e-32 | 0.3237471      | 0.335 | 0.129        | 2.493573e-28 | 12 |
| MAP4K1       | DZ 3           |       |              |              |    |
| 3.534787e-32 | -0.4727602     | 0.021 | 0.107        | 6.302171e-28 | 12 |
| MTSS1        | DZ 3           |       |              |              |    |
| 4.232915e-32 | 0.3010742      | 0.407 | 0.187        | 7.546864e-28 | 12 |
| FYTTD1       | DZ 3           |       |              |              |    |
| 4.682863e-32 | -0.8078115     | 0.41  | 0.48         | 8.349076e-28 | 12 |
| SQSTM1       | DZ 3           |       |              |              |    |
| 6.222974e-32 | 0.3233568      | 0.49  | 0.244        | 1.109494e-27 | 12 |
| COA3         | DZ 3           |       |              |              |    |
| 7.149319e-32 | 0.3017847      | 0.217 | 0.045        | 1.274652e-27 | 12 |
| AURKB        | DZ 3           |       |              |              |    |
| 7.389785e-32 | 0.3209616      | 0.387 | 0.17         | 1.317525e-27 | 12 |
| EIF4E2       | DZ 3           |       |              |              |    |
| 8.822709e-32 | 0.306122 0.376 | 0.167 | 1.573001e-27 | 12           |    |
| CLTB         | DZ 3           |       |              |              |    |
| 8.958921e-32 | 0.3121876      | 0.308 | 0.112        | 1.597286e-27 | 12 |
| BRWD1        | DZ 3           |       |              |              |    |
| 9.59158e-32  | 0.3125184      | 0.33  | 0.131        | 1.710083e-27 | 12 |
| GTF2E2       | DZ 3           |       |              |              |    |
| 1.079669e-31 | -0.7738638     | 0.24  | 0.304        | 1.924942e-27 | 12 |
| ZFP36L2      | DZ 3           |       |              |              |    |
| 1.096827e-31 | 0.3022074      | 0.377 | 0.157        | 1.955533e-27 | 12 |
| BRD7         | DZ 3           |       |              |              |    |
| 1.597508e-31 | -0.82075 0.214 | 0.315 | 2.848196e-27 | 12           |    |
| HSP90B1      | DZ 3           |       |              |              |    |
| 3.391361e-31 | 0.3031289      | 0.421 | 0.197        | 6.046458e-27 | 12 |
| URM1         | DZ 3           |       |              |              |    |
| 3.617773e-31 | 0.3283071      | 0.478 | 0.223        | 6.450127e-27 | 12 |
| ATM          | DZ 3           |       |              |              |    |
| 8.23368e-31  | -0.4382657     | 0.023 | 0.111        | 1.467983e-26 | 12 |
| SNX9         | DZ 3           |       |              |              |    |
| 1.185405e-30 | 0.3087856      | 0.543 | 0.298        | 2.113458e-26 | 12 |
| CHMP2A       | DZ 3           |       |              |              |    |
| 1.203828e-30 | 0.3045707      | 0.558 | 0.29         | 2.146305e-26 | 12 |
| IFT57        | DZ 3           |       |              |              |    |
| 1.618646e-30 | -0.4518981     | 0.029 | 0.115        | 2.885884e-26 | 12 |
| P2RY10       | DZ 3           |       |              |              |    |
| 2.510731e-30 | 0.3143681      | 0.415 | 0.184        | 4.476382e-26 | 12 |
| RFC1         | DZ 3           |       |              |              |    |
| 3.4005e-30   | -0.6632221     | 0.265 | 0.338        | 6.062752e-26 | 12 |
| CD48         | DZ 3           |       |              |              |    |
| 4.159138e-30 | 0.3032052      | 0.458 | 0.222        | 7.415327e-26 | 12 |
| IAH1         | DZ 3           |       |              |              |    |
| 8.586076e-30 | -0.6509634     | 0.189 | 0.246        | 1.530811e-25 | 12 |
| RASGRP2      | DZ 3           |       |              |              |    |

|              |            |       |       |              |              |
|--------------|------------|-------|-------|--------------|--------------|
| 1.095986e-29 | 0.311967   | 0.466 | 0.204 | 1.954033e-25 | 12           |
| FAM111B      | DZ         | 3     |       |              |              |
| 1.118649e-29 | -0.4967735 |       | 0.067 | 0.152        | 1.994439e-25 |
| ESYT1        | DZ         | 3     |       |              | 12           |
| 1.67081e-29  | 0.3090822  |       | 0.464 | 0.232        | 2.978888e-25 |
| TSG101       | DZ         | 3     |       |              | 12           |
| 2.206803e-29 | 0.3212499  |       | 0.476 | 0.271        | 3.934509e-25 |
| EIF1AY       | DZ         | 3     |       |              | 12           |
| 2.970638e-29 | 0.417494   | 0.209 | 0.067 | 5.296351e-25 | 12           |
| RASSF6       | DZ         | 3     |       |              |              |
| 3.66705e-29  | -0.4512587 |       | 0.026 | 0.102        | 6.537984e-25 |
| RHOC         | DZ         | 3     |       |              | 12           |
| 4.977025e-29 | 0.3154836  |       | 0.334 | 0.137        | 8.873538e-25 |
| IN080C       | DZ         | 3     |       |              | 12           |
| 5.196362e-29 | 0.3038593  |       | 0.245 | 0.092        | 9.264595e-25 |
| RAD17        | DZ         | 3     |       |              | 12           |
| 6.044984e-29 | -0.6067574 |       | 0.218 | 0.308        | 1.07776e-24  |
| TMEM147      | DZ         | 3     |       |              | 12           |
| 8.504202e-29 | -0.3599486 |       | 0.019 | 0.1          | 1.516214e-24 |
| PARVB        | DZ         | 3     |       |              | 12           |
| 1.386804e-28 | -0.5026969 |       | 0.085 | 0.165        | 2.472533e-24 |
| TNFRSF14     | DZ         | 3     |       |              | 12           |
| 1.530271e-28 | -0.4520071 |       | 0.038 | 0.12         | 2.72832e-24  |
| FCGR2B       | DZ         | 3     |       |              | 12           |
| 3.37153e-28  | -0.5363442 |       | 0.081 | 0.173        | 6.0111e-24   |
| PARP14       | DZ         | 3     |       |              | 12           |
| 3.740529e-28 | -0.7156661 |       | 0.266 | 0.346        | 6.66899e-24  |
| INSIG1       | DZ         | 3     |       |              | 12           |
| 5.633213e-28 | -0.554827  |       | 0.123 | 0.192        | 1.004346e-23 |
| S1PR4        | DZ         | 3     |       |              | 12           |
| 6.186407e-28 | -0.7550377 |       | 0.383 | 0.447        | 1.102974e-23 |
| KLF6         | DZ         | 3     |       |              | 12           |
| 1.175295e-26 | -0.6892699 |       | 0.452 | 0.493        | 2.095433e-22 |
| CYTIP        | DZ         | 3     |       |              | 12           |
| 1.312885e-26 | -0.4381568 |       | 0.052 | 0.122        | 2.340743e-22 |
| IL27RA       | DZ         | 3     |       |              | 12           |
| 1.58778e-26  | -0.7268164 |       | 0.442 | 0.505        | 2.830853e-22 |
| TSC22D3      | DZ         | 3     |       |              | 12           |
| 4.173316e-26 | -0.4627626 |       | 0.086 | 0.161        | 7.440605e-22 |
| ARHGAP15     | DZ         | 3     |       |              | 12           |
| 5.134227e-26 | -0.6418876 |       | 0.152 | 0.213        | 9.153813e-22 |
| LBH          | DZ         | 3     |       |              | 12           |
| 5.763865e-26 | -0.6592343 |       | 0.346 | 0.388        | 1.027639e-21 |
| PSAP         | DZ         | 3     |       |              | 12           |
| 1.198116e-25 | -0.6102095 |       | 0.314 | 0.385        | 2.136121e-21 |
| LAPTM4A      | DZ         | 3     |       |              | 12           |
| 1.242522e-25 | 0.3163714  |       | 0.261 | 0.094        | 2.215292e-21 |
| MX1          | DZ         | 3     |       |              | 12           |
| 1.784106e-25 | -0.6031595 |       | 0.709 | 0.717        | 3.180882e-21 |
| EIF4A2       | DZ         | 3     |       |              | 12           |

|              |            |       |       |              |     |
|--------------|------------|-------|-------|--------------|-----|
| 3.65922e-25  | 0.3058982  | 0.271 | 0.103 | 6.524023e-21 | 12  |
| E2F5         | DZ 3       |       |       |              |     |
| 4.22648e-25  | -0.5234335 | 0.928 | 0.917 | 7.535392e-21 | 12  |
| PFDN5        | DZ 3       |       |       |              |     |
| 5.801535e-25 | -0.5442631 | 0.14  | 0.208 | 1.034356e-20 | 12  |
| C16orf74     | DZ 3       |       |       |              |     |
| 6.106225e-25 | -0.3872445 | 0.997 | 0.991 | 1.088679e-20 | 12  |
| RPL30        | DZ 3       |       |       |              |     |
| 7.057755e-25 | -0.4798689 | 0.113 | 0.191 | 1.258327e-20 | 12  |
| SYTL1        | DZ 3       |       |       |              |     |
| 1.042879e-24 | -0.6315069 | 0.307 | 0.363 | 1.859349e-20 | 12  |
| ANXA6        | DZ 3       |       |       |              |     |
| 1.465524e-24 | -0.6674183 | 0.461 | 0.502 | 2.612883e-20 | 12  |
| FOXP1        | DZ 3       |       |       |              |     |
| 2.360205e-24 | -0.5399406 | 0.164 | 0.233 | 4.20801e-20  | 12  |
| HSD17B11     | DZ 3       |       |       |              |     |
| 1.002911e-23 | -0.6735021 | 0.27  | 0.347 | 1.78809e-19  | 12  |
| CAST         | DZ 3       |       |       |              |     |
| 1.290781e-23 | -0.5159602 | 0.184 | 0.253 | 2.301334e-19 | 12  |
| DNPH1        | DZ 3       |       |       |              |     |
| 1.464962e-23 | -0.5730457 | 0.123 | 0.198 | 2.611881e-19 | 12  |
| CHPT1        | DZ 3       |       |       |              |     |
| 1.957184e-23 | -0.3992821 | 0.053 | 0.115 | 3.489463e-19 | 12  |
| LGALS9       | DZ 3       |       |       |              |     |
| 2.017487e-23 | -0.3576419 | 0.986 | 0.985 | 3.596978e-19 | 12  |
| RPL27        | DZ 3       |       |       |              |     |
| 3.723976e-23 | -0.5728303 | 0.082 | 0.162 | 6.639476e-19 | 12  |
| DDIT4        | DZ 3       |       |       |              |     |
| 1.399222e-22 | -0.6140346 | 0.192 | 0.281 | 2.494673e-18 | 12  |
| WARS         | DZ 3       |       |       |              |     |
| 1.80726e-22  | -0.5612211 | 0.164 | 0.23  | 3.222165e-18 | 12  |
| NT5C3A       | DZ 3       |       |       |              |     |
| 2.086326e-22 | -0.513201  | 0.113 | 0.176 | 3.71971e-18  | 12  |
| MARCH1       | DZ 3       |       |       |              |     |
| 4.212071e-22 | -0.4922486 | 0.127 | 0.196 | 7.509702e-18 | 12  |
| ADK          | DZ 3       |       |       |              |     |
| 5.279629e-22 | -0.3970054 | 0.054 | 0.113 | 9.413051e-18 | 12  |
| SESN3        | DZ 3       |       |       |              |     |
| 6.048437e-22 | -0.7348151 | 0.305 | 0.361 | 1.078376e-17 | 12  |
| ARID5B       | DZ 3       |       |       |              |     |
| 8.225279e-22 | -0.3844953 | 0.047 | 0.116 | 1.466485e-17 | 12  |
| PYCR1        | DZ 3       |       |       |              |     |
| 1.035821e-21 | -0.57154   | 0.277 | 0.335 | 1.846764e-17 | 12  |
| DZ 3         |            |       |       |              | BTK |
| 1.1376e-21   | -0.4363632 | 0.048 | 0.107 | 2.028226e-17 | 12  |
| C1orf162     | DZ 3       |       |       |              |     |
| 1.983746e-21 | -0.4915245 | 0.114 | 0.191 | 3.536821e-17 | 12  |
| IFNGR1       | DZ 3       |       |       |              |     |
| 2.277938e-21 | -0.3648735 | 0.039 | 0.103 | 4.061335e-17 | 12  |
| PHF1         | DZ 3       |       |       |              |     |

|              |            |       |       |              |    |
|--------------|------------|-------|-------|--------------|----|
| 3.899517e-21 | -0.5283329 | 0.164 | 0.207 | 6.952449e-17 | 12 |
| PRKCB        | DZ 3       |       |       |              |    |
| 6.610674e-21 | -0.4879385 | 0.087 | 0.149 | 1.178617e-16 | 12 |
| ARRDC2       | DZ 3       |       |       |              |    |
| 7.752274e-21 | -0.4971153 | 0.148 | 0.218 | 1.382153e-16 | 12 |
| NFKBIE       | DZ 3       |       |       |              |    |
| 1.178089e-20 | -0.5419043 | 0.671 | 0.624 | 2.100414e-16 | 12 |
| HLA-DMB      | DZ 3       |       |       |              |    |
| 2.083589e-20 | -0.5095216 | 0.169 | 0.226 | 3.714831e-16 | 12 |
| TMEM109      | DZ 3       |       |       |              |    |
| 2.603472e-20 | 0.3197538  | 0.663 | 0.389 | 4.641731e-16 | 12 |
| CSTB         | DZ 3       |       |       |              |    |
| 3.289834e-20 | -0.5064611 | 0.147 | 0.205 | 5.865445e-16 | 12 |
| IRF1         | DZ 3       |       |       |              |    |
| 6.424151e-20 | -0.3722812 | 0.045 | 0.106 | 1.145362e-15 | 12 |
| PDE4B        | DZ 3       |       |       |              |    |
| 1.995173e-19 | -0.3763793 | 0.051 | 0.117 | 3.557194e-15 | 12 |
| ENTPD1       | DZ 3       |       |       |              |    |
| 2.189407e-19 | -0.5106407 | 0.13  | 0.198 | 3.903493e-15 | 12 |
| TYMP         | DZ 3       |       |       |              |    |
| 2.227597e-19 | -0.3004156 | 0.997 | 0.995 | 3.971582e-15 | 12 |
| RPL31        | DZ 3       |       |       |              |    |
| 1.723826e-18 | -0.4537874 | 0.1   | 0.172 | 3.07341e-14  | 12 |
| DDIT3        | DZ 3       |       |       |              |    |
| 2.086081e-18 | -0.3452575 | 0.053 | 0.11  | 3.719275e-14 | 12 |
| HEXB         | DZ 3       |       |       |              |    |
| 2.160936e-18 | -0.5451133 | 0.228 | 0.283 | 3.852732e-14 | 12 |
| MT-ND4L      | DZ 3       |       |       |              |    |
| 3.370791e-18 | -0.5241989 | 0.88  | 0.847 | 6.009784e-14 | 12 |
| CD37         | DZ 3       |       |       |              |    |
| 3.60445e-18  | -0.5550645 | 0.321 | 0.362 | 6.426373e-14 | 12 |
| TAPBP        | DZ 3       |       |       |              |    |
| 4.826421e-18 | -0.4458075 | 0.991 | 0.985 | 8.605025e-14 | 12 |
| TMSB10       | DZ 3       |       |       |              |    |
| 5.92277e-18  | -0.564602  | 0.166 | 0.219 | 1.055971e-13 | 12 |
| EIF4EBP1     | DZ 3       |       |       |              |    |
| 8.45124e-18  | -0.5482279 | 0.35  | 0.384 | 1.506772e-13 | 12 |
| C19orf70     | DZ 3       |       |       |              |    |
| 1.375786e-17 | -0.4556375 | 0.116 | 0.176 | 2.452889e-13 | 12 |
| ASAH1        | DZ 3       |       |       |              |    |
| 1.813726e-17 | -0.3794904 | 0.079 | 0.124 | 3.233692e-13 | 12 |
| RNF213       | DZ 3       |       |       |              |    |
| 2.155796e-17 | -0.4310565 | 0.13  | 0.186 | 3.843569e-13 | 12 |
| FKBP4        | DZ 3       |       |       |              |    |
| 3.495052e-17 | -0.5454105 | 0.445 | 0.45  | 6.231329e-13 | 12 |
| DRAP1        | DZ 3       |       |       |              |    |
| 4.358117e-17 | -0.4424304 | 0.136 | 0.197 | 7.770087e-13 | 12 |
| AARS         | DZ 3       |       |       |              |    |
| 6.231675e-17 | -0.4345028 | 0.093 | 0.146 | 1.111045e-12 | 12 |
| SUN2         | DZ 3       |       |       |              |    |



|              |            |       |       |              |    |
|--------------|------------|-------|-------|--------------|----|
| 6.299792e-17 | -0.4607832 | 0.152 | 0.206 | 1.12319e-12  | 12 |
| AP1S2        | DZ 3       |       |       |              |    |
| 7.584701e-17 | -0.492871  | 0.137 | 0.201 | 1.352276e-12 | 12 |
| PPP3CA       | DZ 3       |       |       |              |    |
| 1.221485e-16 | -0.4524134 | 0.179 | 0.22  | 2.177786e-12 | 12 |
| CCDC50       | DZ 3       |       |       |              |    |
| 1.680213e-16 | -0.6404899 | 0.268 | 0.296 | 2.995652e-12 | 12 |
| NFKBIA       | DZ 3       |       |       |              |    |
| 1.755253e-16 | -0.3233661 | 0.066 | 0.116 | 3.129441e-12 | 12 |
| U2AF1L4      | DZ 3       |       |       |              |    |
| 2.480029e-16 | -0.5857565 | 0.652 | 0.618 | 4.421644e-12 | 12 |
| CLEC2D       | DZ 3       |       |       |              |    |
| 2.886005e-16 | -0.6462619 | 0.658 | 0.615 | 5.145458e-12 | 12 |
| MEF2C        | DZ 3       |       |       |              |    |
| 4.539073e-16 | -0.3757392 | 0.089 | 0.149 | 8.092712e-12 | 12 |
| MVP          | DZ 3       |       |       |              |    |
| 8.590261e-16 | -0.6769586 | 0.089 | 0.132 | 1.531558e-11 | 12 |
| MYC          | DZ 3       |       |       |              |    |
| 9.348225e-16 | -0.4639507 | 0.908 | 0.881 | 1.666695e-11 | 12 |
| MS4A1        | DZ 3       |       |       |              |    |
| 1.068434e-15 | -0.4031725 | 0.118 | 0.154 | 1.904911e-11 | 12 |
| SRPK2        | DZ 3       |       |       |              |    |
| 1.164299e-15 | -0.8166134 | 0.564 | 0.57  | 2.075828e-11 | 12 |
| VIM          | DZ 3       |       |       |              |    |
| 1.317747e-15 | -0.4997339 | 0.225 | 0.264 | 2.349411e-11 | 12 |
| TTC3         | DZ 3       |       |       |              |    |
| 3.020534e-15 | -0.3549316 | 0.07  | 0.118 | 5.38531e-11  | 12 |
| SLAMF1       | DZ 3       |       |       |              |    |
| 3.056911e-15 | -0.6249857 | 0.712 | 0.696 | 5.450166e-11 | 12 |
| HLA-DQB1     | DZ 3       |       |       |              |    |
| 3.423641e-15 | -0.3597467 | 0.071 | 0.122 | 6.10401e-11  | 12 |
| LACTB        | DZ 3       |       |       |              |    |
| 5.079905e-15 | -0.3023386 | 0.056 | 0.106 | 9.056963e-11 | 12 |
| SERTAD1      | DZ 3       |       |       |              |    |
| 5.103372e-15 | -0.5124846 | 0.253 | 0.284 | 9.098802e-11 | 12 |
| GNG7         | DZ 3       |       |       |              |    |
| 5.985325e-15 | -0.4651104 | 0.263 | 0.286 | 1.067124e-10 | 12 |
| CNPY3        | DZ 3       |       |       |              |    |
| 6.105945e-15 | -0.3054855 | 0.059 | 0.104 | 1.088629e-10 | 12 |
| PRCP         | DZ 3       |       |       |              |    |
| 7.874057e-15 | -0.320048  | 0.055 | 0.101 | 1.403866e-10 | 12 |
| PRNP         | DZ 3       |       |       |              |    |
| 1.515384e-14 | -0.524621  | 0.322 | 0.342 | 2.701778e-10 | 12 |
| PKIG         | DZ 3       |       |       |              |    |
| 2.382427e-14 | -0.7752396 | 0.797 | 0.749 | 4.24763e-10  | 12 |
| CXCR4        | DZ 3       |       |       |              |    |
| 3.552895e-14 | -0.4111008 | 0.169 | 0.196 | 6.334456e-10 | 12 |
| AFF3         | DZ 3       |       |       |              |    |
| 4.653112e-14 | -0.3594592 | 0.113 | 0.159 | 8.296033e-10 | 12 |
| EVI2A        | DZ 3       |       |       |              |    |

|              |                |       |              |              |    |
|--------------|----------------|-------|--------------|--------------|----|
| 6.560912e-14 | -0.4514657     | 0.257 | 0.287        | 1.169745e-09 | 12 |
| ERG28        | DZ 3           |       |              |              |    |
| 8.692174e-14 | -0.3556048     | 0.079 | 0.118        | 1.549728e-09 | 12 |
| SAMD9        | DZ 3           |       |              |              |    |
| 9.151399e-14 | -0.5932465     | 0.691 | 0.652        | 1.631603e-09 | 12 |
| HLA-DQA1     | DZ 3           |       |              |              |    |
| 1.132178e-13 | -0.3259713     | 0.087 | 0.133        | 2.018559e-09 | 12 |
| DUSP22       | DZ 3           |       |              |              |    |
| 1.979307e-13 | -0.3382965     | 0.096 | 0.13         | 3.528906e-09 | 12 |
| MUM1         | DZ 3           |       |              |              |    |
| 3.436136e-13 | -0.4656174     | 0.32  | 0.345        | 6.126286e-09 | 12 |
| RNH1         | DZ 3           |       |              |              |    |
| 3.662361e-13 | -0.4276406     | 0.179 | 0.195        | 6.529624e-09 | 12 |
| FAM129C      | DZ 3           |       |              |              |    |
| 4.07979e-13  | -0.32657 0.121 | 0.161 | 7.273858e-09 | 12           |    |
| VKORC1       | DZ 3           |       |              |              |    |
| 4.26808e-13  | -0.4052919     | 0.181 | 0.203        | 7.609561e-09 | 12 |
| BIN1         | DZ 3           |       |              |              |    |
| 4.515052e-13 | -0.3650233     | 0.099 | 0.134        | 8.049887e-09 | 12 |
| ODF2L        | DZ 3           |       |              |              |    |
| 5.414484e-13 | -0.3667528     | 0.109 | 0.149        | 9.653484e-09 | 12 |
| SVIP         | DZ 3           |       |              |              |    |
| 5.483906e-13 | -0.3662255     | 0.073 | 0.11         | 9.777256e-09 | 12 |
| LINC02397    | DZ 3           |       |              |              |    |
| 5.778811e-13 | -0.373672      | 0.123 | 0.159        | 1.030304e-08 | 12 |
| GLIPR1       | DZ 3           |       |              |              |    |
| 5.988413e-13 | -0.3253611     | 0.082 | 0.124        | 1.067674e-08 | 12 |
| SLC38A2      | DZ 3           |       |              |              |    |
| 6.398238e-13 | -0.4553408     | 0.464 | 0.452        | 1.140742e-08 | 12 |
| TMEM59       | DZ 3           |       |              |              |    |
| 6.423499e-13 | -0.3842544     | 0.13  | 0.172        | 1.145246e-08 | 12 |
| TRIM44       | DZ 3           |       |              |              |    |
| 6.855192e-13 | -0.4499345     | 0.252 | 0.263        | 1.222212e-08 | 12 |
| FKBP2        | DZ 3           |       |              |              |    |
| 8.351681e-13 | -0.3169039     | 0.079 | 0.114        | 1.489021e-08 | 12 |
| PBXIP1       | DZ 3           |       |              |              |    |
| 8.519495e-13 | -0.4218948     | 0.18  | 0.212        | 1.518941e-08 | 12 |
| FMNL1        | DZ 3           |       |              |              |    |
| 9.938911e-13 | -0.4615192     | 0.978 | 0.976        | 1.772008e-08 | 12 |
| FTH1         | DZ 3           |       |              |              |    |
| 1.016502e-12 | -0.4032642     | 0.114 | 0.164        | 1.812321e-08 | 12 |
| CD58         | DZ 3           |       |              |              |    |
| 1.096409e-12 | -0.4611667     | 0.175 | 0.209        | 1.954788e-08 | 12 |
| PIM3         | DZ 3           |       |              |              |    |
| 1.252116e-12 | -0.4973932     | 0.302 | 0.321        | 2.232398e-08 | 12 |
| TUBA1A       | DZ 3           |       |              |              |    |
| 1.344855e-12 | -0.4365602     | 0.118 | 0.167        | 2.397741e-08 | 12 |
| CBX6         | DZ 3           |       |              |              |    |
| 1.772324e-12 | -0.4615931     | 0.191 | 0.233        | 3.159876e-08 | 12 |
| TARS         | DZ 3           |       |              |              |    |

|              |            |       |       |              |    |
|--------------|------------|-------|-------|--------------|----|
| 1.819221e-12 | -0.4172155 | 0.922 | 0.916 | 3.24349e-08  | 12 |
| EEF1B2       | DZ 3       |       |       |              |    |
| 3.469186e-12 | -0.3057723 | 0.988 | 0.982 | 6.185212e-08 | 12 |
| RPS21        | DZ 3       |       |       |              |    |
| 3.62947e-12  | -0.3512713 | 0.079 | 0.124 | 6.470981e-08 | 12 |
| DDAH2        | DZ 3       |       |       |              |    |
| 4.128099e-12 | -0.5217701 | 0.488 | 0.475 | 7.359988e-08 | 12 |
| TNFAIP8      | DZ 3       |       |       |              |    |
| 5.174333e-12 | -0.4964582 | 0.849 | 0.815 | 9.225319e-08 | 12 |
| NOP53        | DZ 3       |       |       |              |    |
| 6.483723e-12 | -0.3536412 | 0.155 | 0.173 | 1.155983e-07 | 12 |
| IRF7         | DZ 3       |       |       |              |    |
| 8.941242e-12 | -0.3213121 | 0.082 | 0.12  | 1.594134e-07 | 12 |
| LIPA         | DZ 3       |       |       |              |    |
| 1.489589e-11 | -0.710591  | 0.554 | 0.498 | 2.655787e-07 | 12 |
| SSR4         | DZ 3       |       |       |              |    |
| 1.616885e-11 | -0.4768777 | 0.342 | 0.351 | 2.882745e-07 | 12 |
| APOBEC3G     | DZ 3       |       |       |              |    |
| 1.985103e-11 | -0.4188844 | 0.096 | 0.137 | 3.539239e-07 | 12 |
| PSAT1        | DZ 3       |       |       |              |    |
| 2.185987e-11 | -0.5037176 | 0.403 | 0.389 | 3.897396e-07 | 12 |
| ARL6IP5      | DZ 3       |       |       |              |    |
| 3.01852e-11  | -0.3338053 | 0.141 | 0.18  | 5.381719e-07 | 12 |
| DNPEP        | DZ 3       |       |       |              |    |
| 3.482042e-11 | -0.4579996 | 0.257 | 0.281 | 6.208132e-07 | 12 |
| MSM01        | DZ 3       |       |       |              |    |
| 4.468247e-11 | -0.3056957 | 0.09  | 0.118 | 7.966438e-07 | 12 |
| HPCAL1       | DZ 3       |       |       |              |    |
| 5.063561e-11 | -0.5534023 | 0.349 | 0.338 | 9.027823e-07 | 12 |
| IER2         | DZ 3       |       |       |              |    |
| 5.480655e-11 | -0.4604482 | 0.092 | 0.126 | 9.77146e-07  | 12 |
| LGALS3       | DZ 3       |       |       |              |    |
| 6.289332e-11 | -0.4727205 | 0.727 | 0.675 | 1.121325e-06 | 12 |
| TAGLN2       | DZ 3       |       |       |              |    |
| 7.666263e-11 | -0.4235294 | 0.262 | 0.284 | 1.366818e-06 | 12 |
| DPP7         | DZ 3       |       |       |              |    |
| 1.087416e-10 | -0.3325664 | 0.094 | 0.124 | 1.938754e-06 | 12 |
| RAB13        | DZ 3       |       |       |              |    |
| 1.150881e-10 | -0.4892439 | 0.605 | 0.574 | 2.051906e-06 | 12 |
| APRT         | DZ 3       |       |       |              |    |
| 1.729425e-10 | -0.3697167 | 0.153 | 0.183 | 3.083392e-06 | 12 |
| CMSS1        | DZ 3       |       |       |              |    |
| 1.764547e-10 | -0.3214126 | 0.095 | 0.127 | 3.146011e-06 | 12 |
| ZEB2         | DZ 3       |       |       |              |    |
| 2.121936e-10 | -0.5029396 | 0.237 | 0.256 | 3.7832e-06   | 12 |
| SRGN         | DZ 3       |       |       |              |    |
| 2.236711e-10 | -0.4273633 | 0.652 | 0.636 | 3.987832e-06 | 12 |
| CD53         | DZ 3       |       |       |              |    |
| 2.440874e-10 | -0.3322939 | 0.138 | 0.173 | 4.351834e-06 | 12 |
| DHRS7        | DZ 3       |       |       |              |    |

|              |            |       |       |              |    |
|--------------|------------|-------|-------|--------------|----|
| 2.559837e-10 | -0.3164162 | 0.098 | 0.137 | 4.563934e-06 | 12 |
| CD46         | DZ 3       |       |       |              |    |
| 3.171724e-10 | -0.3051531 | 0.113 | 0.142 | 5.654866e-06 | 12 |
| TM2D3        | DZ 3       |       |       |              |    |
| 3.864214e-10 | -0.3630121 | 0.168 | 0.204 | 6.889506e-06 | 12 |
| NDFIP1       | DZ 3       |       |       |              |    |
| 4.198364e-10 | -0.3438607 | 0.13  | 0.155 | 7.485264e-06 | 12 |
| RILPL2       | DZ 3       |       |       |              |    |
| 5.175651e-10 | -0.4417188 | 0.443 | 0.421 | 9.227668e-06 | 12 |
| APEX1        | DZ 3       |       |       |              |    |
| 6.663675e-10 | -0.3106454 | 0.109 | 0.135 | 1.188067e-05 | 12 |
| PLEKH01      | DZ 3       |       |       |              |    |
| 1.326163e-09 | -0.3074891 | 0.142 | 0.159 | 2.364415e-05 | 12 |
| TPP1         | DZ 3       |       |       |              |    |
| 1.991239e-09 | -0.4071101 | 0.389 | 0.368 | 3.55018e-05  | 12 |
| MEAF6        | DZ 3       |       |       |              |    |
| 3.443003e-09 | -0.4089852 | 0.305 | 0.297 | 6.13853e-05  | 12 |
| PDLIM1       | DZ 3       |       |       |              |    |
| 5.773347e-09 | -0.3343728 | 0.096 | 0.131 | 0.000102933  | 12 |
| RP9          | DZ 3       |       |       |              |    |
| 7.265904e-09 | -0.3763293 | 0.17  | 0.184 | 0.0001295438 | 12 |
| MBP          | DZ 3       |       |       |              |    |
| 7.561524e-09 | -0.3082015 | 0.124 | 0.148 | 0.0001348144 | 12 |
| TSPAN3       | DZ 3       |       |       |              |    |
| 7.970997e-09 | -0.307975  | 0.1   | 0.115 | 0.0001421149 | 12 |
| CLN8         | DZ 3       |       |       |              |    |
| 8.9808e-09   | -0.3904532 | 0.312 | 0.298 | 0.0001601187 | 12 |
| MPH0SPH8     | DZ 3       |       |       |              |    |
| 9.866342e-09 | -0.4131238 | 0.47  | 0.455 | 0.000175907  | 12 |
| CTSS         | DZ 3       |       |       |              |    |
| 1.175632e-08 | -0.3999997 | 0.659 | 0.626 | 0.0002096034 | 12 |
| ATP6V0E1     | DZ 3       |       |       |              |    |
| 1.681922e-08 | -0.3941387 | 0.296 | 0.284 | 0.0002998698 | 12 |
| ACAP1        | DZ 3       |       |       |              |    |
| 2.178264e-08 | -0.5645584 | 0.336 | 0.326 | 0.0003883627 | 12 |
| SLC3A2       | DZ 3       |       |       |              |    |
| 2.480589e-08 | -0.3648776 | 0.214 | 0.207 | 0.0004422643 | 12 |
| CCDC32       | DZ 3       |       |       |              |    |
| 2.553458e-08 | -0.3489936 | 0.234 | 0.241 | 0.0004552561 | 12 |
| SLC38A1      | DZ 3       |       |       |              |    |
| 3.616796e-08 | -0.3572301 | 0.177 | 0.185 | 0.0006448386 | 12 |
| ANKRD44      | DZ 3       |       |       |              |    |
| 6.099288e-08 | -0.344851  | 0.319 | 0.305 | 0.001087442  | 12 |
| FIS1         | DZ 3       |       |       |              |    |
| 6.81343e-08  | -0.3472037 | 0.226 | 0.214 | 0.001214766  | 12 |
| YPEL3        | DZ 3       |       |       |              |    |
| 8.277306e-08 | -0.3943953 | 0.431 | 0.383 | 0.001475761  | 12 |
| EVL          | DZ 3       |       |       |              |    |
| 1.296626e-07 | -0.3683633 | 0.418 | 0.394 | 0.002311755  | 12 |
| TCF25        | DZ 3       |       |       |              |    |

|              |            |       |       |             |    |
|--------------|------------|-------|-------|-------------|----|
| 1.772614e-07 | -0.344797  | 0.227 | 0.233 | 0.003160393 | 12 |
| SPINT2       | DZ 3       |       |       |             |    |
| 3.288583e-07 | -0.3732724 | 0.144 | 0.143 | 0.005863215 | 12 |
| DUSP1        | DZ 3       |       |       |             |    |
| 3.5523e-07   | -0.8558287 | 0.835 | 0.64  | 0.006333396 | 12 |
| IGLC2        | DZ 3       |       |       |             |    |
| 3.607081e-07 | -0.4513848 | 0.524 | 0.479 | 0.006431064 | 12 |
| ISCU         | DZ 3       |       |       |             |    |
| 3.733749e-07 | -0.3642225 | 0.249 | 0.252 | 0.006656901 | 12 |
| NFE2L2       | DZ 3       |       |       |             |    |
| 4.185273e-07 | -0.3692474 | 0.239 | 0.24  | 0.007461923 | 12 |
| ANKRD11      | DZ 3       |       |       |             |    |
| 5.903638e-07 | -0.3787875 | 0.344 | 0.324 | 0.0105256   | 12 |
| P4HB         | DZ 3       |       |       |             |    |
| 6.326723e-07 | -0.5174747 | 0.543 | 0.483 | 0.01127991  | 12 |
| NEAT1        | DZ 3       |       |       |             |    |
| 7.125436e-07 | -0.3616168 | 0.153 | 0.152 | 0.01270394  | 12 |
| NFKBID       | DZ 3       |       |       |             |    |
| 9.872928e-07 | -0.4019644 | 0.285 | 0.28  | 0.01760244  | 12 |
| SRM          | DZ 3       |       |       |             |    |
| 1.36635e-06  | -0.4207969 | 0.676 | 0.618 | 0.02436065  | 12 |
| IFI16        | DZ 3       |       |       |             |    |
| 1.551783e-06 | -0.3478871 | 0.24  | 0.235 | 0.02766674  | 12 |
| CNPPD1       | DZ 3       |       |       |             |    |
| 1.651615e-06 | -0.3193202 | 0.285 | 0.274 | 0.02944664  | 12 |
| SPG21        | DZ 3       |       |       |             |    |
| 1.792464e-06 | -0.3838777 | 0.31  | 0.28  | 0.03195783  | 12 |
| SMCHD1       | DZ 3       |       |       |             |    |
| 1.891561e-06 | -0.3360696 | 0.194 | 0.204 | 0.03372464  | 12 |
| PTPN1        | DZ 3       |       |       |             |    |
| 1.968605e-06 | -0.3455553 | 0.904 | 0.865 | 0.03509825  | 12 |
| CD79A        | DZ 3       |       |       |             |    |
| 2.086623e-06 | -0.3289062 | 0.175 | 0.181 | 0.0372024   | 12 |
| CDC42SE1     | DZ 3       |       |       |             |    |
| 2.22634e-06  | -0.3532079 | 0.315 | 0.285 | 0.03969342  | 12 |
| SP110        | DZ 3       |       |       |             |    |
| 3.490717e-06 | -0.3238653 | 0.213 | 0.205 | 0.06223599  | 12 |
| RALGPS2      | DZ 3       |       |       |             |    |
| 6.449751e-06 | -0.318792  | 0.22  | 0.221 | 0.1149926   | 12 |
| RNF187       | DZ 3       |       |       |             |    |
| 7.019506e-06 | -0.4069805 | 0.704 | 0.651 | 0.1251508   | 12 |
| TMBIM6       | DZ 3       |       |       |             |    |
| 7.670997e-06 | -0.3190277 | 0.395 | 0.206 | 0.1367662   | 12 |
| PLCG2        | DZ 3       |       |       |             |    |
| 1.086028e-05 | -0.3927116 | 0.374 | 0.335 | 0.193628    | 12 |
| S100A11      | DZ 3       |       |       |             |    |
| 1.28353e-05  | -0.3245832 | 0.912 | 0.899 | 0.2288406   | 12 |
| DDX5         | DZ 3       |       |       |             |    |
| 1.48999e-05  | -0.3302102 | 0.265 | 0.248 | 0.2656503   | 12 |
| BBX          | DZ 3       |       |       |             |    |

|               |            |       |       |               |    |       |            |
|---------------|------------|-------|-------|---------------|----|-------|------------|
| 1.67876e-05   | -0.3430022 | 0.191 | 0.19  | 0.2993061     | 12 |       |            |
| RNF145        | DZ 3       |       |       |               |    |       |            |
| 1.925048e-05  | -0.3417333 | 0.302 | 0.281 | 0.3432168     | 12 |       |            |
| RTN4          | DZ 3       |       |       |               |    |       |            |
| 2.676039e-05  | -0.3497006 | 0.293 | 0.274 | 0.4771111     | 12 |       |            |
| TNRC6B        | DZ 3       |       |       |               |    |       |            |
| 3.60201e-05   | -0.3243625 | 0.224 | 0.212 | 0.6422023     | 12 |       |            |
| WASHC4        | DZ 3       |       |       |               |    |       |            |
| 8.624007e-05  | -0.3415856 | 0.693 | 0.613 | 1             | 12 |       |            |
| PNISR         | DZ 3       |       |       |               |    |       |            |
| 0.0001259037  | -0.3728606 | 0.658 | 0.601 | 1             | 12 |       |            |
| ARF6          | DZ 3       |       |       |               |    |       |            |
| 0.0001306232  | -0.3340229 | 0.226 | 0.217 | 1             | 12 |       |            |
| HMGCS1        | DZ 3       |       |       |               |    |       |            |
| 0.0002943932  | -0.5154259 | 0.867 | 0.772 | 1             | 12 |       |            |
| HLA-DPB1      | DZ 3       |       |       |               |    |       |            |
| 0.0003258006  | -0.4276864 | 0.209 | 0.146 | 1             | 12 |       |            |
| IGHA1         | DZ 3       |       |       |               |    |       |            |
| 0.000360312   | -0.3287355 | 0.445 | 0.407 | 1             | 12 |       |            |
| TMBIM4        | DZ 3       |       |       |               |    |       |            |
| 0.0003718775  | -0.3054823 | 0.337 | 0.305 | 1             | 12 |       |            |
| EAPP          | DZ 3       |       |       |               |    |       |            |
| 0.0003720698  | -0.3390518 | 0.37  | 0.318 | 1             | 12 |       |            |
| LTA4H         | DZ 3       |       |       |               |    |       |            |
| 0.0004621782  | -0.3077593 | 0.322 | 0.284 | 1             | 12 |       |            |
| PPM1K         | DZ 3       |       |       |               |    |       |            |
| 0.0006060694  | -0.3689323 | 0.457 | 0.397 | 1             | 12 |       |            |
| BLOC1S2       | DZ 3       |       |       |               |    |       |            |
| 0.0006362125  | -0.3595261 | 0.419 | 0.329 | 1             | 12 |       |            |
| RIPOR2        | DZ 3       |       |       |               |    |       |            |
| 0.001141281   | -0.3055707 | 0.378 | 0.334 | 1             | 12 |       |            |
| VOPP1         | DZ 3       |       |       |               |    |       |            |
| 0.001360364   | -0.4001418 | 0.776 | 0.694 | 1             | 12 |       |            |
| HNRNPDL       | DZ 3       |       |       |               |    |       |            |
| 0.002795865   | -2.41346   | 0.626 | 0.446 | 1             | 12 | IGHG3 | DZ         |
| 3             |            |       |       |               |    |       |            |
| 0.003917643   | -0.3910859 | 0.677 | 0.608 | 1             | 12 |       |            |
| SYNGR2        | DZ 3       |       |       |               |    |       |            |
| 0.004952813   | -0.384797  | 0.874 | 0.813 | 1             | 12 |       |            |
| HLA-DPA1      | DZ 3       |       |       |               |    |       |            |
| 0.005353021   | -0.3222661 | 0.492 | 0.418 | 1             | 12 |       |            |
| KMT2E         | DZ 3       |       |       |               |    |       |            |
| 0.007658328   | -0.3004877 | 0.577 | 0.48  | 1             | 12 |       |            |
| RABAC1        | DZ 3       |       |       |               |    |       |            |
| 0             | 2.945458   | 0.799 | 0.194 | 0             | 13 | FOS   | Naive IER2 |
| 0             | 2.014825   | 0.679 | 0.329 | 0             | 13 | IER2  | Naive IER2 |
| 0             | 2.002731   | 0.849 | 0.446 | 0             | 13 | JUNB  | Naive IER2 |
| 3.011744e-309 | 1.976956   | 0.698 | 0.306 | 5.369639e-305 | 13 |       |            |
| CD69          | Naive IER2 |       |       |               |    |       |            |
| 2.866117e-185 | 1.534163   | 0.577 | 0.26  | 5.11e-181     | 13 | JUN   |            |

|               |            |            |       |               |               |    |
|---------------|------------|------------|-------|---------------|---------------|----|
|               | Naive IER2 |            |       |               |               |    |
| 2.697418e-168 | 1.358758   | 0.58       | 0.321 | 4.809227e-164 | 13            |    |
| ZFP36         | Naive IER2 |            |       |               |               |    |
| 1.666575e-145 | 0.443256   | 1          | 1     | 2.971337e-141 | 13            |    |
| MALAT1        | Naive IER2 |            |       |               |               |    |
| 1.212167e-132 | 1.331309   | 0.375      | 0.137 | 2.161172e-128 | 13            |    |
| DUSP1         | Naive IER2 |            |       |               |               |    |
| 2.575835e-128 | 0.9125367  |            | 0.177 | 0.022         | 4.592456e-124 | 13 |
|               | EGR1       | Naive IER2 |       |               |               |    |
| 1.915227e-110 | 0.8818226  |            | 0.889 | 0.747         | 3.414658e-106 | 13 |
|               | CXCR4      | Naive IER2 |       |               |               |    |
| 3.904174e-107 | 0.4093619  |            | 0.997 | 0.904         | 6.960752e-103 | 13 |
|               | IGHM       | Naive IER2 |       |               |               |    |
| 1.544826e-99  | 0.742316   | 0.153      | 0.028 | 2.75427e-95   | 13            |    |
| FOSB          | Naive IER2 |            |       |               |               |    |
| 1.474143e-77  | 0.5309451  |            | 0.969 | 0.934         | 2.628249e-73  | 13 |
|               | BTG1       | Naive IER2 |       |               |               |    |
| 2.307434e-75  | -1.268671  |            | 0.032 | 0.211         | 4.113925e-71  | 13 |
|               | RGS13      | Naive IER2 |       |               |               |    |
| 4.035532e-75  | 1.292104   | 0.289      | 0.148 | 7.19495e-71   | 13            |    |
| DUSP2         | Naive IER2 |            |       |               |               |    |
| 1.230724e-71  | 0.9341249  |            | 0.58  | 0.443         | 2.194258e-67  | 13 |
|               | BTG2       | Naive IER2 |       |               |               |    |
| 2.481428e-71  | -0.9197776 |            | 0.341 | 0.606         | 4.424137e-67  | 13 |
|               | PRDX1      | Naive IER2 |       |               |               |    |
| 2.059671e-68  | 0.6078868  |            | 0.117 | 0.023         | 3.672188e-64  | 13 |
|               | NR4A1      | Naive IER2 |       |               |               |    |
| 2.458172e-68  | 0.4118685  |            | 0.996 | 0.985         | 4.382675e-64  | 13 |
|               | TMSB10     | Naive IER2 |       |               |               |    |
| 4.087088e-65  | -0.9421152 |            | 0.487 | 0.721         | 7.286868e-61  | 13 |
|               | ENO1       | Naive IER2 |       |               |               |    |
| 1.163259e-61  | -0.9309233 |            | 0.78  | 0.891         | 2.073975e-57  | 13 |
|               | GAPDH      | Naive IER2 |       |               |               |    |
| 3.351103e-60  | 0.5993134  |            | 0.776 | 0.602         | 5.974682e-56  | 13 |
|               | IGHD       | Naive IER2 |       |               |               |    |
| 2.738574e-58  | 0.9691755  |            | 0.426 | 0.292         | 4.882603e-54  | 13 |
|               | NFKBIA     | Naive IER2 |       |               |               |    |
| 6.765787e-55  | -0.985624  |            | 0.176 | 0.41          | 1.206272e-50  | 13 |
|               | FABP5      | Naive IER2 |       |               |               |    |
| 1.163641e-54  | -0.8359815 |            | 0.095 | 0.309         | 2.074656e-50  | 13 |
|               | CD27       | Naive IER2 |       |               |               |    |
| 9.388842e-54  | 0.7111722  |            | 0.129 | 0.038         | 1.673937e-49  | 13 |
|               | EGR2       | Naive IER2 |       |               |               |    |
| 1.356476e-53  | -0.6933234 |            | 0.562 | 0.766         | 2.418461e-49  | 13 |
|               | PKM        | Naive IER2 |       |               |               |    |
| 1.638246e-52  | -0.5835551 |            | 0.781 | 0.902         | 2.920828e-48  | 13 |
|               | PFN1       | Naive IER2 |       |               |               |    |
| 6.312355e-51  | -0.7730785 |            | 0.097 | 0.304         | 1.12543e-46   | 13 |
|               | NME1       | Naive IER2 |       |               |               |    |
| 2.164468e-50  | -0.5539492 |            | 0.317 | 0.56          | 3.859029e-46  | 13 |

|              |            |       |       |              |    |
|--------------|------------|-------|-------|--------------|----|
| SEC61G       | Naive IER2 |       |       |              |    |
| 2.018933e-47 | -0.5644573 | 0.168 | 0.399 | 3.599555e-43 | 13 |
| YWHAE        | Naive IER2 |       |       |              |    |
| 2.790661e-47 | -0.6304577 | 0.021 | 0.152 | 4.97547e-43  | 13 |
| BIK          | Naive IER2 |       |       |              |    |
| 4.249088e-47 | -0.8407349 | 0.04  | 0.194 | 7.575699e-43 | 13 |
| PTTG1        | Naive IER2 |       |       |              |    |
| 4.840719e-47 | 0.4104486  | 0.937 | 0.867 | 8.630518e-43 | 13 |
| CD52         | Naive IER2 |       |       |              |    |
| 2.660263e-46 | -0.5706257 | 0.33  | 0.577 | 4.742982e-42 | 13 |
| SNRPE        | Naive IER2 |       |       |              |    |
| 3.20661e-46  | -0.7987314 | 0.192 | 0.414 | 5.717065e-42 | 13 |
| TXN          | Naive IER2 |       |       |              |    |
| 8.987097e-46 | -0.5175646 | 0.326 | 0.565 | 1.602309e-41 | 13 |
| ATP5PF       | Naive IER2 |       |       |              |    |
| 1.017321e-45 | -0.6253739 | 0.213 | 0.445 | 1.813782e-41 | 13 |
| HMGA1        | Naive IER2 |       |       |              |    |
| 1.144874e-44 | -0.5755464 | 0.192 | 0.403 | 2.041196e-40 | 13 |
| BASP1        | Naive IER2 |       |       |              |    |
| 1.53832e-44  | -0.5567909 | 0.126 | 0.334 | 2.74267e-40  | 13 |
| RFTN1        | Naive IER2 |       |       |              |    |
| 1.834461e-44 | -0.5334006 | 0.359 | 0.585 | 3.270661e-40 | 13 |
| LDHB         | Naive IER2 |       |       |              |    |
| 1.227373e-43 | -0.6478686 | 0.24  | 0.467 | 2.188283e-39 | 13 |
| HSPD1        | Naive IER2 |       |       |              |    |
| 1.520318e-42 | -0.6137317 | 0.106 | 0.308 | 2.710574e-38 | 13 |
| ODC1         | Naive IER2 |       |       |              |    |
| 2.824526e-42 | -0.7819228 | 0.626 | 0.79  | 5.035847e-38 | 13 |
| ACTG1        | Naive IER2 |       |       |              |    |
| 6.806895e-41 | -0.6217502 | 0.561 | 0.74  | 1.213601e-36 | 13 |
| HSPA8        | Naive IER2 |       |       |              |    |
| 6.0643e-40   | -0.4469574 | 0.013 | 0.121 | 1.081204e-35 | 13 |
| CD38         | Naive IER2 |       |       |              |    |
| 6.743689e-40 | -0.5888483 | 0.079 | 0.238 | 1.202332e-35 | 13 |
| UBE2J1       | Naive IER2 |       |       |              |    |
| 1.603063e-39 | -0.7670743 | 0.375 | 0.582 | 2.858101e-35 | 13 |
| TUBB         | Naive IER2 |       |       |              |    |
| 2.871222e-39 | -0.5071573 | 0.394 | 0.603 | 5.119102e-35 | 13 |
| SEC61B       | Naive IER2 |       |       |              |    |
| 4.951486e-39 | -0.5513444 | 0.339 | 0.558 | 8.828005e-35 | 13 |
| TCEA1        | Naive IER2 |       |       |              |    |
| 5.228634e-39 | -0.4668838 | 0.191 | 0.41  | 9.322131e-35 | 13 |
| PSMB2        | Naive IER2 |       |       |              |    |
| 7.117561e-39 | -0.9223051 | 0.049 | 0.185 | 1.26899e-34  | 13 |
| XBP1         | Naive IER2 |       |       |              |    |
| 1.524212e-38 | -0.4381134 | 0.02  | 0.134 | 2.717518e-34 | 13 |
| PHGDH        | Naive IER2 |       |       |              |    |
| 1.753944e-38 | -0.4673919 | 0.219 | 0.45  | 3.127107e-34 | 13 |
| C1QBP        | Naive IER2 |       |       |              |    |
| 2.120248e-38 | -0.4581395 | 0.231 | 0.454 | 3.780191e-34 | 13 |



|              |            |       |       |              |    |  |
|--------------|------------|-------|-------|--------------|----|--|
| SEM1         | Naive IER2 |       |       |              |    |  |
| 5.82977e-38  | -0.5106942 | 0.26  | 0.479 | 1.03939e-33  | 13 |  |
| SNRPD1       | Naive IER2 |       |       |              |    |  |
| 5.94281e-38  | -0.4182209 | 0.422 | 0.645 | 1.059544e-33 | 13 |  |
| ATP5MD       | Naive IER2 |       |       |              |    |  |
| 8.930886e-38 | -0.5988335 | 0.581 | 0.752 | 1.592288e-33 | 13 |  |
| RAN          | Naive IER2 |       |       |              |    |  |
| 2.456377e-37 | -0.4971628 | 0.643 | 0.807 | 4.379475e-33 | 13 |  |
| RPS26        | Naive IER2 |       |       |              |    |  |
| 2.949067e-37 | -0.3469671 | 0.01  | 0.103 | 5.257891e-33 | 13 |  |
| MYBL2        | Naive IER2 |       |       |              |    |  |
| 3.409833e-37 | -0.5531664 | 0.103 | 0.284 | 6.079391e-33 | 13 |  |
| SRM          | Naive IER2 |       |       |              |    |  |
| 4.699937e-37 | -0.4569422 | 0.331 | 0.54  | 8.379517e-33 | 13 |  |
| SRSF9        | Naive IER2 |       |       |              |    |  |
| 5.609513e-37 | -0.4968886 | 0.482 | 0.685 | 1.00012e-32  | 13 |  |
| SRSF3        | Naive IER2 |       |       |              |    |  |
| 7.117154e-37 | -0.4460034 | 0.404 | 0.613 | 1.268917e-32 | 13 |  |
| POMP         | Naive IER2 |       |       |              |    |  |
| 1.125208e-36 | -0.6737921 | 0.723 | 0.851 | 2.006133e-32 | 13 |  |
| HSP90AB1     | Naive IER2 |       |       |              |    |  |
| 2.098385e-36 | -0.4783918 | 0.247 | 0.395 | 3.74121e-32  | 13 |  |
| EIF5A        | Naive IER2 |       |       |              |    |  |
| 2.202673e-36 | -0.4623666 | 0.423 | 0.633 | 3.927146e-32 | 13 |  |
| ATP5F1B      | Naive IER2 |       |       |              |    |  |
| 2.962191e-36 | -0.5239513 | 0.23  | 0.447 | 5.281291e-32 | 13 |  |
| PPA1         | Naive IER2 |       |       |              |    |  |
| 3.607608e-36 | -0.4550583 | 0.219 | 0.436 | 6.432005e-32 | 13 |  |
| SLIRP        | Naive IER2 |       |       |              |    |  |
| 3.880095e-36 | -0.5710862 | 0.138 | 0.324 | 6.917821e-32 | 13 |  |
| SEC11C       | Naive IER2 |       |       |              |    |  |
| 9.724428e-36 | -0.4459524 | 0.236 | 0.458 | 1.733768e-31 | 13 |  |
| VDAC1        | Naive IER2 |       |       |              |    |  |
| 1.058114e-35 | 0.7126009  | 0.504 | 0.426 | 1.886511e-31 | 13 |  |
| PPP1R15A     | Naive IER2 |       |       |              |    |  |
| 1.087294e-35 | 0.4384049  | 0.895 | 0.846 | 1.938536e-31 | 13 |  |
| CD37         | Naive IER2 |       |       |              |    |  |
| 1.320961e-35 | -0.5000355 | 0.074 | 0.238 | 2.355142e-31 | 13 |  |
| MTHFD2       | Naive IER2 |       |       |              |    |  |
| 1.759838e-35 | -0.4785541 | 0.371 | 0.589 | 3.137615e-31 | 13 |  |
| ANP32B       | Naive IER2 |       |       |              |    |  |
| 1.863139e-35 | -0.4158828 | 0.399 | 0.613 | 3.32179e-31  | 13 |  |
| POLR2L       | Naive IER2 |       |       |              |    |  |
| 4.775969e-35 | -0.4981553 | 0.015 | 0.111 | 8.515076e-31 | 13 |  |
| VPREB3       | Naive IER2 |       |       |              |    |  |
| 8.654691e-35 | -0.5263932 | 0.185 | 0.39  | 1.543045e-30 | 13 |  |
| NHP2         | Naive IER2 |       |       |              |    |  |
| 9.460395e-35 | -0.4258012 | 0.568 | 0.748 | 1.686694e-30 | 13 |  |
| CHCHD2       | Naive IER2 |       |       |              |    |  |
| 1.174182e-34 | 0.6816612  | 0.349 | 0.235 | 2.093448e-30 | 13 |  |

|              |                |       |              |              |    |  |
|--------------|----------------|-------|--------------|--------------|----|--|
| CD55         | Naive IER2     |       |              |              |    |  |
| 2.838217e-34 | -0.5065491     | 0.887 | 0.943        | 5.060257e-30 | 13 |  |
| YBX1         | Naive IER2     |       |              |              |    |  |
| 3.305319e-34 | -0.4342128     | 0.187 | 0.394        | 5.893053e-30 | 13 |  |
| CCT5         | Naive IER2     |       |              |              |    |  |
| 8.24436e-34  | -0.5953828     | 0.05  | 0.194        | 1.469887e-29 | 13 |  |
| DAAM1        | Naive IER2     |       |              |              |    |  |
| 9.874669e-34 | -0.42367 0.388 | 0.589 | 1.760555e-29 | 13           |    |  |
| ATP5MC3      | Naive IER2     |       |              |              |    |  |
| 1.82394e-33  | -0.4174812     | 0.136 | 0.328        | 3.251902e-29 | 13 |  |
| IMP4         | Naive IER2     |       |              |              |    |  |
| 2.387422e-33 | -0.3870412     | 0.749 | 0.873        | 4.256535e-29 | 13 |  |
| ARPC2        | Naive IER2     |       |              |              |    |  |
| 2.433113e-33 | 0.5718796      | 0.546 | 0.445        | 4.337997e-29 | 13 |  |
| PNRC1        | Naive IER2     |       |              |              |    |  |
| 2.434505e-33 | -0.3948153     | 0.542 | 0.727        | 4.340479e-29 | 13 |  |
| COX6C        | Naive IER2     |       |              |              |    |  |
| 2.976925e-33 | -0.5667594     | 0.403 | 0.602        | 5.307559e-29 | 13 |  |
| LDHA         | Naive IER2     |       |              |              |    |  |
| 3.131919e-33 | -0.542485      | 0.296 | 0.503        | 5.583899e-29 | 13 |  |
| HSPE1        | Naive IER2     |       |              |              |    |  |
| 5.023602e-33 | -0.4110142     | 0.106 | 0.286        | 8.95658e-29  | 13 |  |
| PSMD14       | Naive IER2     |       |              |              |    |  |
| 7.232574e-33 | -0.3943348     | 0.394 | 0.61         | 1.289496e-28 | 13 |  |
| RBM3         | Naive IER2     |       |              |              |    |  |
| 9.565901e-33 | -0.3963201     | 0.185 | 0.393        | 1.705505e-28 | 13 |  |
| NDUFS6       | Naive IER2     |       |              |              |    |  |
| 1.082768e-32 | -0.4490156     | 0.041 | 0.164        | 1.930466e-28 | 13 |  |
| SUSD3        | Naive IER2     |       |              |              |    |  |
| 1.204417e-32 | -0.4669999     | 0.448 | 0.642        | 2.147355e-28 | 13 |  |
| SET          | Naive IER2     |       |              |              |    |  |
| 1.215311e-32 | 0.5267438      | 0.655 | 0.574        | 2.166777e-28 | 13 |  |
| SARAF        | Naive IER2     |       |              |              |    |  |
| 1.427298e-32 | 0.6138799      | 0.251 | 0.155        | 2.54473e-28  | 13 |  |
| SLC2A3       | Naive IER2     |       |              |              |    |  |
| 1.859248e-32 | -0.6743505     | 0.524 | 0.7          | 3.314853e-28 | 13 |  |
| H2AFZ        | Naive IER2     |       |              |              |    |  |
| 2.15325e-32  | 0.607727 0.423 | 0.294 | 3.83903e-28  | 13           |    |  |
| LINC00926    | Naive IER2     |       |              |              |    |  |
| 2.524923e-32 | -0.3623146     | 0.303 | 0.525        | 4.501686e-28 | 13 |  |
| PSMB6        | Naive IER2     |       |              |              |    |  |
| 3.986789e-32 | -0.3890847     | 0.293 | 0.509        | 7.108047e-28 | 13 |  |
| EIF3I        | Naive IER2     |       |              |              |    |  |
| 4.467018e-32 | -0.3516983     | 0.281 | 0.508        | 7.964247e-28 | 13 |  |
| NDUFA11      | Naive IER2     |       |              |              |    |  |
| 7.294962e-32 | -0.3887249     | 0.375 | 0.591        | 1.300619e-27 | 13 |  |
| EIF2S2       | Naive IER2     |       |              |              |    |  |
| 7.500699e-32 | -0.5208885     | 0.864 | 0.931        | 1.3373e-27   | 13 |  |
| NPM1         | Naive IER2     |       |              |              |    |  |
| 8.8569e-32   | -0.3710426     | 0.23  | 0.44         | 1.579097e-27 | 13 |  |

|              |            |       |       |              |    |  |
|--------------|------------|-------|-------|--------------|----|--|
| ROM01        | Naive IER2 |       |       |              |    |  |
| 3.930709e-31 | -0.3517353 | 0.496 | 0.69  | 7.008061e-27 | 13 |  |
| COX6A1       | Naive IER2 |       |       |              |    |  |
| 5.327051e-31 | -0.4173949 | 0.028 | 0.143 | 9.4976e-27   | 13 |  |
| AIM2         | Naive IER2 |       |       |              |    |  |
| 5.895554e-31 | -0.4415298 | 0.186 | 0.379 | 1.051118e-26 | 13 |  |
| LCP1         | Naive IER2 |       |       |              |    |  |
| 5.979738e-31 | -0.4398345 | 0.11  | 0.278 | 1.066128e-26 | 13 |  |
| POU2AF1      | Naive IER2 |       |       |              |    |  |
| 8.006345e-31 | -0.3933348 | 0.446 | 0.639 | 1.427451e-26 | 13 |  |
| PSMA4        | Naive IER2 |       |       |              |    |  |
| 9.011369e-31 | -0.3875316 | 0.536 | 0.711 | 1.606637e-26 | 13 |  |
| NDUFA4       | Naive IER2 |       |       |              |    |  |
| 1.035136e-30 | -0.3891674 | 0.449 | 0.645 | 1.845544e-26 | 13 |  |
| ATP5MF       | Naive IER2 |       |       |              |    |  |
| 1.079644e-30 | -1.050398  | 0.14  | 0.29  | 1.924897e-26 | 13 |  |
| MIR155HG     | Naive IER2 |       |       |              |    |  |
| 1.363349e-30 | -0.4105533 | 0.602 | 0.764 | 2.430715e-26 | 13 |  |
| PSMA7        | Naive IER2 |       |       |              |    |  |
| 1.612306e-30 | -0.3516419 | 0.014 | 0.114 | 2.87458e-26  | 13 |  |
| AC023590.1   | Naive IER2 |       |       |              |    |  |
| 1.632513e-30 | -0.4042082 | 0.25  | 0.457 | 2.910608e-26 | 13 |  |
| MRPL51       | Naive IER2 |       |       |              |    |  |
| 1.870139e-30 | -0.5400442 | 0.185 | 0.364 | 3.33427e-26  | 13 |  |
| H2AFV        | Naive IER2 |       |       |              |    |  |
| 2.39142e-30  | -0.3943437 | 0.05  | 0.171 | 4.263663e-26 | 13 |  |
| CCDC88A      | Naive IER2 |       |       |              |    |  |
| 2.481856e-30 | -0.380769  | 0.294 | 0.503 | 4.4249e-26   | 13 |  |
| COX5A        | Naive IER2 |       |       |              |    |  |
| 2.958075e-30 | -0.3483303 | 0.462 | 0.661 | 5.273952e-26 | 13 |  |
| PSMB1        | Naive IER2 |       |       |              |    |  |
| 3.452508e-30 | -0.3877226 | 0.126 | 0.308 | 6.155477e-26 | 13 |  |
| GLRX3        | Naive IER2 |       |       |              |    |  |
| 3.624525e-30 | -0.3787171 | 0.459 | 0.645 | 6.462165e-26 | 13 |  |
| ERH          | Naive IER2 |       |       |              |    |  |
| 3.816508e-30 | -0.3723411 | 0.367 | 0.572 | 6.804452e-26 | 13 |  |
| UQCRQ        | Naive IER2 |       |       |              |    |  |
| 4.148661e-30 | -0.3703152 | 0.241 | 0.456 | 7.396648e-26 | 13 |  |
| NDUFB9       | Naive IER2 |       |       |              |    |  |
| 4.210906e-30 | -0.3498769 | 0.369 | 0.578 | 7.507624e-26 | 13 |  |
| PARK7        | Naive IER2 |       |       |              |    |  |
| 4.394935e-30 | -0.392298  | 0.096 | 0.257 | 7.83573e-26  | 13 |  |
| RGS10        | Naive IER2 |       |       |              |    |  |
| 1.155081e-29 | -0.416991  | 0.024 | 0.135 | 2.059394e-25 | 13 |  |
| CYT0R        | Naive IER2 |       |       |              |    |  |
| 2.377239e-29 | -0.4169972 | 0.08  | 0.221 | 4.238379e-25 | 13 |  |
| NANS         | Naive IER2 |       |       |              |    |  |
| 2.550659e-29 | -0.4630311 | 0.141 | 0.312 | 4.547569e-25 | 13 |  |
| CALR         | Naive IER2 |       |       |              |    |  |
| 4.488908e-29 | 0.6092595  | 0.401 | 0.3   | 8.003273e-25 | 13 |  |

|              |            |       |       |              |    |  |
|--------------|------------|-------|-------|--------------|----|--|
| ZFP36L2      | Naive IER2 |       |       |              |    |  |
| 7.236419e-29 | -0.3502058 | 0.203 | 0.407 | 1.290181e-24 | 13 |  |
| MDH2         | Naive IER2 |       |       |              |    |  |
| 9.990091e-29 | -0.3217939 | 0.246 | 0.451 | 1.781133e-24 | 13 |  |
| ATP5F1C      | Naive IER2 |       |       |              |    |  |
| 1.112096e-28 | -0.4135643 | 0.272 | 0.468 | 1.982756e-24 | 13 |  |
| PRMT1        | Naive IER2 |       |       |              |    |  |
| 1.192524e-28 | -0.3350299 | 0.037 | 0.158 | 2.126151e-24 | 13 |  |
| PAICS        | Naive IER2 |       |       |              |    |  |
| 1.243839e-28 | -0.3611347 | 0.04  | 0.165 | 2.217641e-24 | 13 |  |
| PPP1R14B     | Naive IER2 |       |       |              |    |  |
| 1.265259e-28 | -0.3411362 | 0.405 | 0.606 | 2.25583e-24  | 13 |  |
| PSMA2        | Naive IER2 |       |       |              |    |  |
| 1.283429e-28 | 0.6666726  | 0.509 | 0.368 | 2.288226e-24 | 13 |  |
| SELL         | Naive IER2 |       |       |              |    |  |
| 1.701365e-28 | -0.4217987 | 0.03  | 0.137 | 3.033364e-24 | 13 |  |
| NEIL1        | Naive IER2 |       |       |              |    |  |
| 2.37476e-28  | -0.3923389 | 0.169 | 0.353 | 4.233959e-24 | 13 |  |
| TIMM13       | Naive IER2 |       |       |              |    |  |
| 3.118032e-28 | -0.3520522 | 0.13  | 0.31  | 5.559139e-24 | 13 |  |
| TIMM8B       | Naive IER2 |       |       |              |    |  |
| 3.261411e-28 | -0.4181536 | 0.203 | 0.398 | 5.81477e-24  | 13 |  |
| PHB          | Naive IER2 |       |       |              |    |  |
| 3.439177e-28 | -0.338014  | 0.195 | 0.393 | 6.131708e-24 | 13 |  |
| MRPL20       | Naive IER2 |       |       |              |    |  |
| 3.516992e-28 | -0.3511139 | 0.433 | 0.637 | 6.270445e-24 | 13 |  |
| COX7B        | Naive IER2 |       |       |              |    |  |
| 8.245163e-28 | -0.5703731 | 0.633 | 0.771 | 1.47003e-23  | 13 |  |
| HMGNI        | Naive IER2 |       |       |              |    |  |
| 9.287741e-28 | -0.3602969 | 0.02  | 0.117 | 1.655911e-23 | 13 |  |
| PYCR1        | Naive IER2 |       |       |              |    |  |
| 1.173377e-27 | -0.3655135 | 0.186 | 0.379 | 2.092013e-23 | 13 |  |
| PSMC3        | Naive IER2 |       |       |              |    |  |
| 1.19919e-27  | -0.3527835 | 0.205 | 0.4   | 2.138035e-23 | 13 |  |
| NDUFAB1      | Naive IER2 |       |       |              |    |  |
| 1.229522e-27 | -0.414003  | 0.339 | 0.534 | 2.192115e-23 | 13 |  |
| PSME2        | Naive IER2 |       |       |              |    |  |
| 1.319019e-27 | -0.3712807 | 0.246 | 0.449 | 2.351679e-23 | 13 |  |
| ATP5MC1      | Naive IER2 |       |       |              |    |  |
| 1.382929e-27 | -0.5121345 | 0.376 | 0.564 | 2.465625e-23 | 13 |  |
| NCL          | Naive IER2 |       |       |              |    |  |
| 1.550194e-27 | -0.3722404 | 0.187 | 0.379 | 2.763841e-23 | 13 |  |
| PSMC1        | Naive IER2 |       |       |              |    |  |
| 1.908024e-27 | -0.3383471 | 0.022 | 0.118 | 3.401815e-23 | 13 |  |
| GMDS         | Naive IER2 |       |       |              |    |  |
| 3.515582e-27 | -0.3781515 | 0.429 | 0.621 | 6.267932e-23 | 13 |  |
| SERBP1       | Naive IER2 |       |       |              |    |  |
| 7.007002e-27 | -0.3668257 | 0.158 | 0.342 | 1.249278e-22 | 13 |  |
| MIF          | Naive IER2 |       |       |              |    |  |
| 9.692573e-27 | -0.3353088 | 0.19  | 0.39  | 1.728089e-22 | 13 |  |

|              |         |            |            |       |       |              |    |
|--------------|---------|------------|------------|-------|-------|--------------|----|
| 1.096638e-26 | SNRPC   | Naive IER2 | -0.4647495 | 0.078 | 0.205 | 1.955196e-22 | 13 |
| 1.261457e-26 | HMCE5   | Naive IER2 | 0.6178568  | 0.574 | 0.501 | 2.249052e-22 | 13 |
| 2.418194e-26 | TSC22D3 | Naive IER2 | -0.4229478 | 0.032 | 0.139 | 4.311398e-22 | 13 |
| 3.519092e-26 | PSAT1   | Naive IER2 | -0.4287805 | 0.321 | 0.517 | 6.27419e-22  | 13 |
| 6.641638e-26 | PA2G4   | Naive IER2 | -0.5383296 | 0.136 | 0.28  | 1.184138e-21 | 13 |
| 7.024478e-26 | HSPA5   | Naive IER2 | -0.3515308 | 0.2   | 0.394 | 1.252394e-21 | 13 |
| 9.004452e-26 | NOL7    | Naive IER2 | -0.4902296 | 0.183 | 0.344 | 1.605404e-21 | 13 |
| 9.09212e-26  | LRMP    | Naive IER2 | 0.6169153  | 0.398 | 0.271 | 1.621034e-21 | 13 |
| 9.259852e-26 | KLF2    | Naive IER2 | -0.4617865 | 0.247 | 0.422 | 1.650939e-21 | 13 |
| 1.140264e-25 | METAP2  | Naive IER2 | -0.3416244 | 0.281 | 0.474 | 2.032977e-21 | 13 |
| 1.568067e-25 | MTDH    | Naive IER2 | -0.346745  | 0.275 | 0.481 | 2.795707e-21 | 13 |
| 1.686968e-25 | PRELID1 | Naive IER2 | -0.3313233 | 0.338 | 0.528 | 3.007696e-21 | 13 |
| 1.865137e-25 | FKBP1A  | Naive IER2 | -0.3017659 | 0.326 | 0.537 | 3.325352e-21 | 13 |
| 2.399746e-25 | GHITM   | Naive IER2 | -0.311382  | 0.213 | 0.406 | 4.278507e-21 | 13 |
| 2.626192e-25 | UQCRFS1 | Naive IER2 | -0.3532248 | 0.319 | 0.519 | 4.682237e-21 | 13 |
| 2.672107e-25 | SSBP1   | Naive IER2 | -0.3663016 | 0.181 | 0.354 | 4.7641e-21   | 13 |
| 4.037495e-25 | PDIA6   | Naive IER2 | -0.3043137 | 0.024 | 0.128 | 7.19845e-21  | 13 |
| 4.050145e-25 | SLC1A5  | Naive IER2 | -0.3083917 | 0.433 | 0.622 | 7.221003e-21 | 13 |
| 4.366502e-25 | NDUFA13 | Naive IER2 | -0.3819666 | 0.494 | 0.661 | 7.785036e-21 | 13 |
| 4.809138e-25 | SLC25A5 | Naive IER2 | -0.3119024 | 0.531 | 0.705 | 8.574212e-21 | 13 |
| 9.382025e-25 | ELOB    | Naive IER2 | -0.4474001 | 0.881 | 0.934 | 1.672721e-20 | 13 |
| 1.076015e-24 | SERF2   | Naive IER2 | -0.3739313 | 0.237 | 0.421 | 1.918428e-20 | 13 |
| 1.172988e-24 | DDX39A  | Naive IER2 | -0.3770255 | 0.12  | 0.275 | 2.091321e-20 | 13 |
| 1.282332e-24 | SMS     | Naive IER2 | -0.4467293 | 0.313 | 0.489 | 2.28627e-20  | 13 |
| 1.314811e-24 | RANBP1  | Naive IER2 | -0.3365008 | 0.131 | 0.288 | 2.344177e-20 | 13 |

|              |            |       |       |              |    |  |
|--------------|------------|-------|-------|--------------|----|--|
| CD82         | Naive IER2 |       |       |              |    |  |
| 1.434866e-24 | -0.3613148 | 0.049 | 0.166 | 2.558223e-20 | 13 |  |
| MRT04        | Naive IER2 |       |       |              |    |  |
| 1.440579e-24 | -0.3156887 | 0.425 | 0.609 | 2.568408e-20 | 13 |  |
| PSMB3        | Naive IER2 |       |       |              |    |  |
| 1.524074e-24 | -0.3453064 | 0.085 | 0.232 | 2.717272e-20 | 13 |  |
| MRPL3        | Naive IER2 |       |       |              |    |  |
| 2.13461e-24  | -0.372958  | 0.374 | 0.545 | 3.805796e-20 | 13 |  |
| PARP1        | Naive IER2 |       |       |              |    |  |
| 2.195524e-24 | -0.3801164 | 0.541 | 0.707 | 3.9144e-20   | 13 |  |
| TPI1         | Naive IER2 |       |       |              |    |  |
| 2.548688e-24 | -0.3657754 | 0.103 | 0.254 | 4.544057e-20 | 13 |  |
| GARS         | Naive IER2 |       |       |              |    |  |
| 3.420423e-24 | -0.3574065 | 0.246 | 0.439 | 6.098272e-20 | 13 |  |
| EIF5B        | Naive IER2 |       |       |              |    |  |
| 3.458963e-24 | -1.121163  | 0.076 | 0.178 | 6.166985e-20 | 13 |  |
| MZB1         | Naive IER2 |       |       |              |    |  |
| 4.671852e-24 | -0.307862  | 0.548 | 0.721 | 8.329444e-20 | 13 |  |
| COX6B1       | Naive IER2 |       |       |              |    |  |
| 4.93937e-24  | -0.3356179 | 0.14  | 0.311 | 8.806402e-20 | 13 |  |
| FERMT3       | Naive IER2 |       |       |              |    |  |
| 6.417166e-24 | -0.3183707 | 0.936 | 0.977 | 1.144117e-19 | 13 |  |
| RPS24        | Naive IER2 |       |       |              |    |  |
| 9.790227e-24 | -0.419205  | 0.26  | 0.442 | 1.7455e-19   | 13 |  |
| COTL1        | Naive IER2 |       |       |              |    |  |
| 9.905046e-24 | -0.3001163 | 0.188 | 0.372 | 1.765971e-19 | 13 |  |
| EWSR1        | Naive IER2 |       |       |              |    |  |
| 1.910391e-23 | -0.4217828 | 0.45  | 0.608 | 3.406037e-19 | 13 |  |
| DYNLL1       | Naive IER2 |       |       |              |    |  |
| 1.99033e-23  | -0.338003  | 0.049 | 0.156 | 3.54856e-19  | 13 |  |
| CD81         | Naive IER2 |       |       |              |    |  |
| 2.224909e-23 | -0.7898438 | 0.58  | 0.719 | 3.966789e-19 | 13 |  |
| HMG2         | Naive IER2 |       |       |              |    |  |
| 2.44187e-23  | -0.3498169 | 0.246 | 0.433 | 4.35361e-19  | 13 |  |
| CCT2         | Naive IER2 |       |       |              |    |  |
| 2.791766e-23 | 0.5348552  | 0.679 | 0.647 | 4.97744e-19  | 13 |  |
| ZFP36L1      | Naive IER2 |       |       |              |    |  |
| 3.60028e-23  | -0.3267915 | 0.147 | 0.318 | 6.41894e-19  | 13 |  |
| STOML2       | Naive IER2 |       |       |              |    |  |
| 4.226117e-23 | -0.3640738 | 0.105 | 0.244 | 7.534744e-19 | 13 |  |
| MYDGF        | Naive IER2 |       |       |              |    |  |
| 4.394911e-23 | -0.3365196 | 0.247 | 0.432 | 7.835686e-19 | 13 |  |
| CCT4         | Naive IER2 |       |       |              |    |  |
| 5.650699e-23 | -0.3290509 | 0.231 | 0.415 | 1.007463e-18 | 13 |  |
| HNRNPR       | Naive IER2 |       |       |              |    |  |
| 6.28747e-23  | -0.3366251 | 0.476 | 0.645 | 1.120993e-18 | 13 |  |
| HNRNPM       | Naive IER2 |       |       |              |    |  |
| 7.346147e-23 | -0.3138788 | 0.042 | 0.148 | 1.309744e-18 | 13 |  |
| PRDX4        | Naive IER2 |       |       |              |    |  |
| 8.736421e-23 | 0.5260741  | 0.276 | 0.193 | 1.557616e-18 | 13 |  |

|              |          |            |            |       |       |              |    |
|--------------|----------|------------|------------|-------|-------|--------------|----|
| 1.128363e-22 | CLEC2B   | Naive IER2 | -0.3455253 | 0.259 | 0.447 | 2.011759e-18 | 13 |
| 1.260557e-22 | CCT6A    | Naive IER2 | -0.4191801 | 0.763 | 0.854 | 2.247447e-18 | 13 |
| 1.350617e-22 | ATP5MG   | Naive IER2 | -0.3455026 | 0.06  | 0.186 | 2.408014e-18 | 13 |
| 1.398467e-22 | TUBA1C   | Naive IER2 | -0.4717218 | 0.194 | 0.357 | 2.493327e-18 | 13 |
| 1.561314e-22 | TUBB4B   | Naive IER2 | -0.3322268 | 0.119 | 0.28  | 2.783667e-18 | 13 |
| 2.849648e-22 | ATOX1    | Naive IER2 | -0.3203295 | 0.087 | 0.229 | 5.080637e-18 | 13 |
| 3.170098e-22 | DCAF13   | Naive IER2 | -0.3073514 | 0.152 | 0.317 | 5.651967e-18 | 13 |
| 3.19555e-22  | ZNF207   | Naive IER2 | -0.3097855 | 0.081 | 0.217 | 5.697346e-18 | 13 |
| 4.111752e-22 | EPRS     | Naive IER2 | -0.3031537 | 0.301 | 0.494 | 7.330843e-18 | 13 |
| 4.511932e-22 | CCT3     | Naive IER2 | -0.3377973 | 0.471 | 0.636 | 8.044324e-18 | 13 |
| 4.788377e-22 | GSTP1    | Naive IER2 | -0.3398414 | 0.142 | 0.306 | 8.537197e-18 | 13 |
| 5.344538e-22 | ATP1B3   | Naive IER2 | -0.3040643 | 0.046 | 0.159 | 9.528776e-18 | 13 |
| 5.927219e-22 | GAR1     | Naive IER2 | -0.3182165 | 0.056 | 0.175 | 1.056764e-17 | 13 |
| 6.045456e-22 | ASNS     | Naive IER2 | -0.3928447 | 0.248 | 0.412 | 1.077844e-17 | 13 |
| 9.113852e-22 | PPIB     | Naive IER2 | -0.3076246 | 0.228 | 0.412 | 1.624909e-17 | 13 |
| 1.066993e-21 | BANF1    | Naive IER2 | -0.3808988 | 0.134 | 0.285 | 1.902342e-17 | 13 |
| 1.179824e-21 | JPT1     | Naive IER2 | -0.4348284 | 0.1   | 0.234 | 2.103509e-17 | 13 |
| 1.194437e-21 | CKS2     | Naive IER2 | -0.3075801 | 0.185 | 0.35  | 2.129562e-17 | 13 |
| 1.273279e-21 | H2AFY    | Naive IER2 | -0.3249772 | 0.242 | 0.424 | 2.270129e-17 | 13 |
| 1.596433e-21 | EIF6     | Naive IER2 | -0.3616735 | 0.185 | 0.357 | 2.846281e-17 | 13 |
| 1.672762e-21 | ANXA5    | Naive IER2 | -0.3019733 | 0.082 | 0.221 | 2.982368e-17 | 13 |
| 1.747818e-21 | MRPL12   | Naive IER2 | 0.4389483  | 0.599 | 0.51  | 3.116185e-17 | 13 |
| 1.826698e-21 | BANK1    | Naive IER2 | -1.323233  | 0.192 | 0.305 | 3.256819e-17 | 13 |
| 2.422561e-21 | HMGB2    | Naive IER2 | 0.5345678  | 0.287 | 0.205 | 4.319185e-17 | 13 |
| 3.837684e-21 | C16orf74 | Naive IER2 | -0.3369799 | 0.394 | 0.569 | 6.842206e-17 | 13 |

|              |          |            |       |       |              |    |
|--------------|----------|------------|-------|-------|--------------|----|
| 1.242778e-20 | SNRPB    | Naive IER2 | 0.339 | 0.25  | 2.215749e-16 | 13 |
| 1.822524e-20 | FCMR     | Naive IER2 | 0.311 | 0.24  | 3.249379e-16 | 13 |
| 1.941466e-20 | PHACTR1  | Naive IER2 | 0.165 | 0.321 | 3.461439e-16 | 13 |
| 2.01976e-20  | DDX21    | Naive IER2 | 0.077 | 0.196 | 3.601029e-16 | 13 |
| 2.020206e-20 | DNMT1    | Naive IER2 | 0.187 | 0.339 | 3.601825e-16 | 13 |
| 2.141534e-20 | DUT      | Naive IER2 | 0.629 | 0.75  | 3.81814e-16  | 13 |
| 4.042682e-20 | HSP90AA1 | Naive IER2 | 0.184 | 0.358 | 7.207698e-16 | 13 |
| 5.9122e-20   | PHB2     | Naive IER2 | 0.294 | 0.473 | 1.054086e-15 | 13 |
| 1.085714e-19 | SNRPF    | Naive IER2 | 0.119 | 0.259 | 1.93572e-15  | 13 |
| 1.195037e-19 | SRGN     | Naive IER2 | 0.535 | 0.493 | 2.130632e-15 | 13 |
| 2.295222e-19 | FXDY5    | Naive IER2 | 0.335 | 0.511 | 4.092152e-15 | 13 |
| 2.822424e-19 | MZT2B    | Naive IER2 | 0.176 | 0.33  | 5.0321e-15   | 13 |
| 3.50408e-19  | SLC3A2   | Naive IER2 | 0.165 | 0.323 | 6.247424e-15 | 13 |
| 4.643086e-19 | PRDX2    | Naive IER2 | 0.189 | 0.335 | 8.278158e-15 | 13 |
| 6.309529e-19 | GRHPR    | Naive IER2 | 0.152 | 0.305 | 1.124926e-14 | 13 |
| 6.479829e-19 | NOP58    | Naive IER2 | 0.317 | 0.488 | 1.155289e-14 | 13 |
| 8.644954e-19 | RPS27L   | Naive IER2 | 0.078 | 0.201 | 1.541309e-14 | 13 |
| 2.076504e-18 | EBNA1BP2 | Naive IER2 | 0.904 | 0.899 | 3.702198e-14 | 13 |
| 2.359719e-18 | DDX5     | Naive IER2 | 0.859 | 0.92  | 4.207143e-14 | 13 |
| 2.584698e-18 | CFL1     | Naive IER2 | 0.489 | 0.639 | 4.608258e-14 | 13 |
| 4.06721e-18  | HERPUD1  | Naive IER2 | 0.549 | 0.669 | 7.251428e-14 | 13 |
| 5.849889e-18 | TUBA1B   | Naive IER2 | 0.116 | 0.219 | 1.042977e-13 | 13 |
| 5.919453e-18 | IGHG1    | Naive IER2 | 0.034 | 0.121 | 1.055379e-13 | 13 |
| 8.182532e-18 | UBE2S    | Naive IER2 | 0.241 | 0.396 | 1.458864e-13 | 13 |
| 1.129834e-17 | FNBP1    | Naive IER2 | 0.088 | 0.214 | 2.014381e-13 | 13 |



|              |                     |                |       |              |              |    |
|--------------|---------------------|----------------|-------|--------------|--------------|----|
| 1.699617e-17 | C19orf48 Naive IER2 | -0.3569983     | 0.121 | 0.246        | 3.030247e-13 | 13 |
| 2.579125e-17 | KPNA2 Naive IER2    | -0.4615336     | 0.46  | 0.591        | 4.598322e-13 | 13 |
| 3.127198e-17 | MARCKSL1 Naive IER2 | -0.3033303     | 0.076 | 0.189        | 5.575482e-13 | 13 |
| 3.68832e-17  | WDR43 Naive IER2    | -0.31239 0.064 | 0.165 | 6.575907e-13 | 13           | 13 |
| 5.026471e-17 | CD58 Naive IER2     | 0.3980668      | 0.153 | 0.085        | 8.961695e-13 | 13 |
| 8.062419e-17 | RNASE6 Naive IER2   | 0.5107941      | 0.658 | 0.615        | 1.437449e-12 | 13 |
| 2.158944e-16 | MEF2C Naive IER2    | -1.990231      | 0.085 | 0.127        | 3.849181e-12 | 13 |
| 2.454615e-16 | IGHG2 Naive IER2    | -0.3289707     | 0.119 | 0.24         | 4.376334e-12 | 13 |
| 2.688132e-16 | GCHFR Naive IER2    | -2.733392      | 0.359 | 0.453        | 4.792671e-12 | 13 |
| 5.168547e-16 | IGHG3 Naive IER2    | -0.3145741     | 0.23  | 0.351        | 9.215003e-12 | 13 |
| 1.17297e-15  | S100A10 Naive IER2  | -0.4630773     | 0.358 | 0.503        | 2.091289e-11 | 13 |
| 4.763051e-15 | SSR4 Naive IER2     | -0.4446434     | 0.066 | 0.161        | 8.492044e-11 | 13 |
| 5.643101e-15 | LMNA Naive IER2     | -0.4539737     | 0.193 | 0.315        | 1.006108e-10 | 13 |
| 6.878533e-15 | HSP90B1 Naive IER2  | 0.4393883      | 0.201 | 0.154        | 1.226374e-10 | 13 |
| 7.412075e-15 | JUND Naive IER2     | 0.411403 0.417 | 0.346 | 1.321499e-10 | 13           | 13 |
| 2.152871e-14 | TRAF3IP3 Naive IER2 | 0.4210003      | 0.513 | 0.466        | 3.838354e-10 | 13 |
| 1.180342e-13 | ITM2B Naive IER2    | 0.45593 0.299  | 0.209 | 2.104432e-09 | 13           | 13 |
| 1.399125e-13 | PLAC8 Naive IER2    | -0.4096221     | 0.08  | 0.174        | 2.494501e-09 | 13 |
| 1.710161e-13 | TNFRSF18 Naive IER2 | -1.296473      | 0.335 | 0.405        | 3.049046e-09 | 13 |
| 2.857286e-13 | JCHAIN Naive IER2   | -0.3444365     | 0.051 | 0.127        | 5.094255e-09 | 13 |
| 1.093776e-12 | LGALS3 Naive IER2   | 0.4035101      | 0.393 | 0.336        | 1.950093e-08 | 13 |
| 1.125846e-12 | HVCN1 Naive IER2    | 0.4207297      | 0.336 | 0.277        | 2.00727e-08  | 13 |
| 4.053644e-12 | ADAM28 Naive IER2   | 0.3845 0.201   | 0.157 | 7.227242e-08 | 13           | 13 |
| 4.896993e-12 | GLIPR1 Naive IER2   | 0.4206394      | 0.299 | 0.243        | 8.730849e-08 | 13 |
| 5.408645e-12 | RASGRP2 Naive IER2  | 0.3770363      | 0.435 | 0.413        | 9.643073e-08 | 13 |

|              |            |            |       |       |              |    |
|--------------|------------|------------|-------|-------|--------------|----|
| 8.524951e-12 | NPC2       | Naive IER2 | 0.39  | 0.359 | 1.519913e-07 | 13 |
| 6.01282e-11  | ARID5B     | Naive IER2 | 0.323 | 0.284 | 1.072026e-06 | 13 |
| 6.543025e-11 | PPM1K      | Naive IER2 | 0.51  | 0.493 | 1.166556e-06 | 13 |
| 8.246103e-11 | SP100      | Naive IER2 | 0.428 | 0.419 | 1.470198e-06 | 13 |
| 8.567175e-11 | AC114760.2 | Naive IER2 | 0.461 | 0.445 | 1.527442e-06 | 13 |
| 1.739982e-10 | KLF6       | Naive IER2 | 0.985 | 0.99  | 3.102214e-06 | 13 |
| 2.529821e-10 | ACTB       | Naive IER2 | 0.072 | 0.15  | 4.510418e-06 | 13 |
| 2.937416e-10 | IGHA1      | Naive IER2 | 0.368 | 0.331 | 5.237119e-06 | 13 |
| 3.009401e-10 | RIPOR2     | Naive IER2 | 0.58  | 0.57  | 5.365461e-06 | 13 |
| 3.946699e-10 | SNX2       | Naive IER2 | 0.151 | 0.11  | 7.036569e-06 | 13 |
| 6.318469e-10 | SESN3      | Naive IER2 | 0.193 | 0.151 | 1.12652e-05  | 13 |
| 2.483399e-09 | NFKBID     | Naive IER2 | 0.374 | 0.346 | 4.427651e-05 | 13 |
| 2.613059e-09 | BIRC3      | Naive IER2 | 0.243 | 0.193 | 4.658823e-05 | 13 |
| 4.69953e-09  | FAM129C    | Naive IER2 | 0.498 | 0.491 | 8.378792e-05 | 13 |
| 1.37945e-08  | CYTIP      | Naive IER2 | 0.405 | 0.383 | 0.0002459422 | 13 |
| 2.017594e-08 | EVL        | Naive IER2 | 0.451 | 0.404 | 0.0003597168 | 13 |
| 2.967299e-08 | SMIM14     | Naive IER2 | 0.109 | 0.085 | 0.0005290397 | 13 |
| 5.255687e-08 | AC103591.3 | Naive IER2 | 0.255 | 0.231 | 0.0009370364 | 13 |
| 6.652654e-08 | HSD17B11   | Naive IER2 | 0.331 | 0.425 | 0.001186102  | 13 |
| 7.321409e-08 | HIST1H4C   | Naive IER2 | 0.533 | 0.523 | 0.001305334  | 13 |
| 1.244992e-07 | ID3        | Naive IER2 | 0.135 | 0.208 | 0.002219696  | 13 |
| 1.380691e-07 | LGALS1     | Naive IER2 | 0.156 | 0.141 | 0.002461634  | 13 |
| 1.772052e-07 | LY9        | Naive IER2 | 0.192 | 0.244 | 0.003159392  | 13 |
| 2.06773e-07  | IGHG4      | Naive IER2 | 0.492 | 0.492 | 0.003686556  | 13 |
| 2.606681e-07 | ANKRD12    | Naive IER2 | 0.342 | 0.329 | 0.004647451  | 13 |

|              |                      |       |           |             |          |           |    |     |
|--------------|----------------------|-------|-----------|-------------|----------|-----------|----|-----|
| SMC6         | Naive IER2           |       |           |             |          |           |    |     |
| 2.952121e-07 | 0.3661958            | 0.302 | 0.279     | 0.005263337 |          |           | 13 |     |
| RNASET2      | Naive IER2           |       |           |             |          |           |    |     |
| 1.264771e-06 | 0.307692 0.112       | 0.079 | 0.0225496 |             |          | 13        |    |     |
| CALHM6       | Naive IER2           |       |           |             |          |           |    |     |
| 2.516105e-06 | 0.3320656            | 0.224 | 0.207     | 0.04485963  |          |           | 13 |     |
| CCDC32       | Naive IER2           |       |           |             |          |           |    |     |
| 6.464904e-06 | 0.3061464            | 0.468 | 0.485     | 0.1152628   |          |           | 13 |     |
| NEAT1        | Naive IER2           |       |           |             |          |           |    |     |
| 1.024248e-05 | 0.317583 0.327       | 0.321 | 0.1826132 |             |          | 13        |    |     |
| TNFRSF13C    | Naive IER2           |       |           |             |          |           |    |     |
| 1.119899e-05 | 0.3299092            | 0.149 | 0.122     | 0.1996669   |          |           | 13 |     |
| AL139020.1   | Naive IER2           |       |           |             |          |           |    |     |
| 5.505882e-05 | 0.3147771            | 0.61  | 0.619     | 0.9816438   |          |           | 13 |     |
| CLEC2D       | Naive IER2           |       |           |             |          |           |    |     |
| 0.00012659   | -1.247421            | 0.353 | 0.431     | 1           |          | 13        |    |     |
| IGLC3        | Naive IER2           |       |           |             |          |           |    |     |
| 0.0001521681 | -1.20305 0.629       | 0.645 | 1         | 13          |          | IGLC2     |    |     |
| Naive IER2   |                      |       |           |             |          |           |    |     |
| 0.0002082475 | -0.460394            | 0.387 | 0.429     | 1           |          | 13        |    |     |
| STMN1        | Naive IER2           |       |           |             |          |           |    |     |
| 0.0002735892 | -0.607489            | 0.909 | 0.927     | 1           |          | 13        |    |     |
| IGKC         | Naive IER2           |       |           |             |          |           |    |     |
| 0.0005344564 | -0.3382777           | 0.5   | 0.572     | 1           |          | 13        |    | VIM |
| Naive IER2   |                      |       |           |             |          |           |    |     |
| 0.001676269  | -0.4105969           | 0.145 | 0.213     | 1           |          | 13        |    |     |
| PLCG2        | Naive IER2           |       |           |             |          |           |    |     |
| 0            | 5.298719 0.894 0.036 | 0     | 14        |             | CCL4     | Activated |    |     |
| Chemokine    |                      |       |           |             |          |           |    |     |
| 0            | 5.083317 0.818 0.03  | 0     | 14        |             | CCL4L2   | Activated |    |     |
| Chemokine    |                      |       |           |             |          |           |    |     |
| 0            | 3.87063 0.735 0.034  | 0     | 14        |             | CCL3     | Activated |    |     |
| Chemokine    |                      |       |           |             |          |           |    |     |
| 0            | 3.110052 0.895 0.112 | 0     | 14        |             | MYC      | Activated |    |     |
| Chemokine    |                      |       |           |             |          |           |    |     |
| 0            | 2.435703 0.907 0.271 | 0     | 14        |             | MIR155HG | Activated |    |     |
| Chemokine    |                      |       |           |             |          |           |    |     |
| 0            | 2.038543 0.35 0.008  | 0     | 14        |             | CCL3L1   | Activated |    |     |
| Chemokine    |                      |       |           |             |          |           |    |     |
| 0            | 1.921057 0.675 0.139 | 0     | 14        |             | DUSP2    | Activated |    |     |
| Chemokine    |                      |       |           |             |          |           |    |     |
| 0            | 1.919963 0.951 0.46  | 0     | 14        |             | CD83     | Activated |    |     |
| Chemokine    |                      |       |           |             |          |           |    |     |
| 0            | 1.914527 0.841 0.305 | 0     | 14        |             | DDX21    | Activated |    |     |
| Chemokine    |                      |       |           |             |          |           |    |     |
| 0            | 1.747822 0.721 0.195 | 0     | 14        |             | PIM3     | Activated |    |     |
| Chemokine    |                      |       |           |             |          |           |    |     |
| 0            | 1.703639 0.65 0.14   | 0     | 14        |             | NFKBID   | Activated |    |     |
| Chemokine    |                      |       |           |             |          |           |    |     |
| 0            | 1.690858 0.812 0.286 | 0     | 14        |             | NME1     | Activated |    |     |

|               |              |           |       |               |               |    |          |           |
|---------------|--------------|-----------|-------|---------------|---------------|----|----------|-----------|
| Chemokine     | 0            | 1.554761  | 0.993 | 0.844         | 0             | 14 | HSP90AB1 | Activated |
| Chemokine     | 0            | 1.554049  | 0.904 | 0.55          | 0             | 14 | NCL      | Activated |
| Chemokine     | 0            | 1.49589   | 0.867 | 0.451         | 0             | 14 | HSPD1    | Activated |
| Chemokine     | 0            | 1.490916  | 0.939 | 0.591         | 0             | 14 | PRDX1    | Activated |
| Chemokine     | 0            | 1.434279  | 0.893 | 0.488         | 0             | 14 | HSPE1    | Activated |
| Chemokine     | 0            | 1.423445  | 0.885 | 0.458         | 0             | 14 | CYCS     | Activated |
| Chemokine     | 0            | 1.377079  | 0.628 | 0.131         | 0             | 14 | NOP16    | Activated |
| Chemokine     | 0            | 1.32482   | 0.962 | 0.709         | 0             | 14 | EN01     | Activated |
| Chemokine     | 0            | 1.313673  | 0.46  | 0.045         | 0             | 14 | CCND2    | Activated |
| Chemokine     | 0            | 1.254839  | 0.961 | 0.743         | 0             | 14 | RAN      | Activated |
| Chemokine     | 0            | 1.1892    | 0.992 | 0.928         | 0             | 14 | NPM1     | Activated |
| Chemokine     | 0            | 1.034924  | 0.993 | 0.941         | 0             | 14 | YBX1     | Activated |
| Chemokine     | 6.09789e-317 | 1.679033  | 0.827 | 0.393         | 1.087193e-312 | 14 |          |           |
| FABP5         | Activated    | Chemokine |       |               |               |    |          |           |
| 2.136201e-301 | 1.325691     | 0.882     | 0.503 | 3.808633e-297 | 14            |    |          |           |
| PA2G4         | Activated    | Chemokine |       |               |               |    |          |           |
| 9.399846e-295 | 1.436504     | 0.731     | 0.269 | 1.675899e-290 | 14            |    | SRM      |           |
| Activated     | Chemokine    |           |       |               |               |    |          |           |
| 5.465351e-291 | 1.277585     | 0.884     | 0.475 | 9.744174e-287 | 14            |    |          |           |
| RANBP1        | Activated    | Chemokine |       |               |               |    |          |           |
| 5.852568e-289 | 1.49005      | 0.785     | 0.315 | 1.043454e-284 | 14            |    |          |           |
| SLC3A2        | Activated    | Chemokine |       |               |               |    |          |           |
| 1.382832e-278 | 1.2949       | 0.796     | 0.351 | 2.465451e-274 | 14            |    |          |           |
| HSPA9         | Activated    | Chemokine |       |               |               |    |          |           |
| 1.506088e-273 | 1.29018      | 0.611     | 0.145 | 2.685205e-269 | 14            |    |          |           |
| NOLC1         | Activated    | Chemokine |       |               |               |    |          |           |
| 2.994331e-270 | 1.397554     | 0.73      | 0.292 | 5.338592e-266 | 14            |    |          |           |
| ODC1          | Activated    | Chemokine |       |               |               |    |          |           |
| 8.601427e-268 | -1.611467    | 0.491     | 0.865 | 1.533548e-263 | 14            |    |          |           |
| CD79B         | Activated    | Chemokine |       |               |               |    |          |           |
| 1.231398e-264 | 1.474442     | 0.74      | 0.285 | 2.19546e-260  | 14            |    |          |           |
| NFKBIA        | Activated    | Chemokine |       |               |               |    |          |           |
| 2.690657e-262 | 1.441787     | 0.637     | 0.166 | 4.797172e-258 | 14            |    |          |           |
| BCL2A1        | Activated    | Chemokine |       |               |               |    |          |           |
| 8.505635e-259 | 1.256573     | 0.654     | 0.213 | 1.51647e-254  | 14            |    |          |           |
| SIAH2         | Activated    | Chemokine |       |               |               |    |          |           |
| 4.626364e-254 | 0.7603474    | 0.996     | 0.963 | 8.248345e-250 | 14            |    |          |           |

|               |                     |       |       |               |               |    |     |
|---------------|---------------------|-------|-------|---------------|---------------|----|-----|
| EIF1          | Activated Chemokine |       |       |               |               |    |     |
| 6.852121e-245 | 1.218072            | 0.351 | 0.033 | 1.221665e-240 | 14            |    |     |
| EGR2          | Activated Chemokine |       |       |               |               |    |     |
| 1.700964e-237 | 1.158488            | 0.817 | 0.419 | 3.032649e-233 | 14            |    |     |
| CCT2          | Activated Chemokine |       |       |               |               |    |     |
| 5.913007e-237 | 1.116881            | 0.876 | 0.521 | 1.05423e-232  | 14            |    |     |
| SRSF7         | Activated Chemokine |       |       |               |               |    |     |
| 3.832051e-229 | 1.284281            | 0.65  | 0.224 | 6.832163e-225 | 14            |    |     |
| MTHFD2        | Activated Chemokine |       |       |               |               |    |     |
| 1.303636e-226 | 1.148129            | 0.516 | 0.105 | 2.324252e-222 | 14            |    |     |
| PYCR1         | Activated Chemokine |       |       |               |               |    |     |
| 5.004363e-225 | 1.20302             | 0.664 | 0.236 | 8.922279e-221 | 14            |    |     |
| DKC1          | Activated Chemokine |       |       |               |               |    |     |
| 7.749028e-225 | 1.171978            | 0.717 | 0.292 | 1.381574e-220 | 14            |    |     |
| ATP1B3        | Activated Chemokine |       |       |               |               |    |     |
| 3.411501e-224 | 1.09427             | 0.517 | 0.109 | 6.082364e-220 | 14            |    |     |
| PN01          | Activated Chemokine |       |       |               |               |    |     |
| 1.933809e-222 | -0.9728773          |       | 0.99  | 0.998         | 3.447789e-218 | 14 |     |
| TMSB4X        | Activated Chemokine |       |       |               |               |    |     |
| 2.734284e-221 | -1.582128           |       | 0.473 | 0.808         | 4.874955e-217 | 14 |     |
| LAPTM5        | Activated Chemokine |       |       |               |               |    |     |
| 2.775937e-220 | 1.145472            | 0.803 | 0.392 | 4.949217e-216 | 14            |    |     |
| RPL22L1       | Activated Chemokine |       |       |               |               |    |     |
| 3.524021e-219 | 1.13084             | 0.562 | 0.139 | 6.282977e-215 | 14            |    |     |
| RPF2          | Activated Chemokine |       |       |               |               |    |     |
| 3.899944e-216 | 1.060082            | 0.839 | 0.465 | 6.95321e-212  | 14            |    |     |
| SNRPD1        | Activated Chemokine |       |       |               |               |    |     |
| 4.533016e-216 | 1.17313             | 0.794 | 0.433 | 8.081915e-212 | 14            |    |     |
| PPA1          | Activated Chemokine |       |       |               |               |    |     |
| 8.265598e-216 | 1.30876             | 0.461 | 0.115 | 1.473673e-211 | 14            |    |     |
| PLEK          | Activated Chemokine |       |       |               |               |    |     |
| 8.073022e-215 | 1.130612            | 0.605 | 0.191 | 1.439339e-210 | 14            |    |     |
| TOMM40        | Activated Chemokine |       |       |               |               |    |     |
| 3.595824e-213 | 1.160538            | 0.736 | 0.312 | 6.410995e-209 | 14            |    |     |
| NOP56         | Activated Chemokine |       |       |               |               |    |     |
| 3.92612e-211  | 1.108971            | 0.816 | 0.425 | 6.999879e-207 | 14            |    |     |
| EIF5B         | Activated Chemokine |       |       |               |               |    |     |
| 4.18455e-211  | 1.094662            | 0.897 | 0.589 | 7.460635e-207 | 14            |    |     |
| LDHA          | Activated Chemokine |       |       |               |               |    |     |
| 1.380771e-209 | 1.086425            | 0.553 | 0.142 | 2.461776e-205 | 14            |    |     |
| PPAN          | Activated Chemokine |       |       |               |               |    |     |
| 1.47351e-209  | 1.083183            | 0.939 | 0.731 | 2.62712e-205  | 14            |    |     |
| HSPA8         | Activated Chemokine |       |       |               |               |    |     |
| 3.731064e-209 | 1.260882            | 0.785 | 0.399 | 6.652114e-205 | 14            |    | TXN |
|               | Activated Chemokine |       |       |               |               |    |     |
| 6.475249e-208 | 1.010682            | 0.905 | 0.609 | 1.154472e-203 | 14            |    |     |
| SERBP1        | Activated Chemokine |       |       |               |               |    |     |
| 7.152749e-207 | 1.086856            | 0.786 | 0.375 | 1.275264e-202 | 14            |    |     |
| NHP2          | Activated Chemokine |       |       |               |               |    |     |
| 1.070381e-206 | 1.280807            | 0.675 | 0.246 | 1.908383e-202 | 14            |    |     |

|               |                     |                     |       |               |               |     |  |
|---------------|---------------------|---------------------|-------|---------------|---------------|-----|--|
| SRGN          | Activated Chemokine |                     |       |               |               |     |  |
| 7.857209e-204 | 1.001287            | 0.832               | 0.44  | 1.400862e-199 | 14            |     |  |
| ILF2          | Activated Chemokine |                     |       |               |               |     |  |
| 6.93548e-202  | 1.056035            | 0.569               | 0.173 | 1.236527e-197 | 14            |     |  |
| ZNF593        | Activated Chemokine |                     |       |               |               |     |  |
| 9.409131e-201 | 1.117471            | 0.632               | 0.225 | 1.677554e-196 | 14            |     |  |
| EIF4A1        | Activated Chemokine |                     |       |               |               |     |  |
| 1.733519e-200 | 1.005408            | 0.486               | 0.108 | 3.09069e-196  | 14            |     |  |
| LYAR          | Activated Chemokine |                     |       |               |               |     |  |
| 1.080095e-199 | 1.052442            | 0.57                | 0.153 | 1.925702e-195 | 14            |     |  |
| MRT04         | Activated Chemokine |                     |       |               |               |     |  |
| 3.751557e-199 | 1.088084            | 0.638               | 0.206 | 6.688651e-195 | 14            |     |  |
| NFKBIE        | Activated Chemokine |                     |       |               |               |     |  |
| 2.196608e-198 | 0.9799984           |                     | 0.878 | 0.564         | 3.916333e-194 | 14  |  |
|               | SNRPE               | Activated Chemokine |       |               |               |     |  |
| 1.411375e-194 | 1.109952            | 0.735               | 0.355 | 2.516341e-190 | 14            |     |  |
| EIF3J         | Activated Chemokine |                     |       |               |               |     |  |
| 3.539669e-193 | 0.9849656           |                     | 0.417 | 0.077         | 6.310876e-189 | 14  |  |
|               | SLC43A3             | Activated Chemokine |       |               |               |     |  |
| 4.00707e-192  | 1.025503            | 0.54                | 0.147 | 7.144205e-188 | 14            |     |  |
| GAR1          | Activated Chemokine |                     |       |               |               |     |  |
| 1.238455e-190 | 1.068987            | 0.576               | 0.187 | 2.208041e-186 | 14            |     |  |
| GTPBP4        | Activated Chemokine |                     |       |               |               |     |  |
| 7.823552e-190 | 1.006515            | 0.824               | 0.455 | 1.394861e-185 | 14            |     |  |
| PRMT1         | Activated Chemokine |                     |       |               |               |     |  |
| 3.64616e-189  | 1.045683            | 0.652               | 0.25  | 6.500739e-185 | 14            | AK6 |  |
|               | Activated Chemokine |                     |       |               |               |     |  |
| 4.966144e-188 | 0.9573              | 0.881               | 0.521 | 8.854138e-184 | 14            |     |  |
| PSME2         | Activated Chemokine |                     |       |               |               |     |  |
| 8.755595e-186 | 0.9797215           |                     | 0.379 | 0.055         | 1.561035e-181 | 14  |  |
|               | PTGER4              | Activated Chemokine |       |               |               |     |  |
| 3.786866e-185 | 0.9906687           |                     | 0.8   | 0.422         | 6.751603e-181 | 14  |  |
|               | SLIRP               | Activated Chemokine |       |               |               |     |  |
| 4.425844e-185 | 1.075638            | 0.579               | 0.176 | 7.890837e-181 | 14            |     |  |
| WDR43         | Activated Chemokine |                     |       |               |               |     |  |
| 1.388565e-183 | 1.111591            | 0.521               | 0.145 | 2.475672e-179 | 14            |     |  |
| RILPL2        | Activated Chemokine |                     |       |               |               |     |  |
| 5.73906e-183  | 1.046177            | 0.575               | 0.189 | 1.023217e-178 | 14            |     |  |
| EBNA1BP2      | Activated Chemokine |                     |       |               |               |     |  |
| 2.385912e-181 | 0.9790941           |                     | 0.481 | 0.112         | 4.253843e-177 | 14  |  |
|               | PAK1IP1             | Activated Chemokine |       |               |               |     |  |
| 2.706253e-180 | 0.985285            | 0.517               | 0.127 | 4.824979e-176 | 14            |     |  |
| IFRD2         | Activated Chemokine |                     |       |               |               |     |  |
| 1.377734e-179 | 1.011251            | 0.627               | 0.227 | 2.456362e-175 | 14            |     |  |
| NIFK          | Activated Chemokine |                     |       |               |               |     |  |
| 2.887336e-177 | 1.138538            | 0.564               | 0.201 | 5.147832e-173 | 14            |     |  |
| CFLAR         | Activated Chemokine |                     |       |               |               |     |  |
| 3.21257e-177  | 0.8414402           |                     | 0.937 | 0.69          | 5.727691e-173 | 14  |  |
|               | HNRNPDL             | Activated Chemokine |       |               |               |     |  |
| 3.776367e-177 | 1.052581            | 0.679               | 0.292 | 6.732885e-173 | 14            |     |  |

|         |                     |                     |               |           |       |               |               |               |
|---------|---------------------|---------------------|---------------|-----------|-------|---------------|---------------|---------------|
| NOP58   | Activated Chemokine | 2.541183e-176       | 1.009062      | 0.582     | 0.178 | 4.530675e-172 | 14            |               |
| GPATCH4 | Activated Chemokine | 9.027639e-176       | 0.8519503     |           | 0.928 | 0.674         | 1.609538e-171 |               |
|         | SRSF3               | Activated Chemokine | 9.491782e-175 | 0.9611166 |       | 0.805         | 0.434         | 1.69229e-170  |
|         | CCT6A               | Activated Chemokine | 5.840708e-174 | 1.213765  | 0.39  | 0.069         | 1.04134e-169  | 14            |
| CD200   | Activated Chemokine | 3.21488e-172        | 0.9198395     |           | 0.85  | 0.506         | 5.731809e-168 |               |
|         | SSBP1               | Activated Chemokine | 2.659847e-169 | 0.98452   | 0.582 | 0.198         | 4.742241e-165 | 14            |
| GNL3    | Activated Chemokine | 4.042626e-169       | 0.8753633     |           | 0.412 | 0.08          | 7.207597e-165 |               |
|         | POLR1C              | Activated Chemokine | 5.738608e-169 | 0.9984722 |       | 0.54          | 0.159         | 1.023136e-164 |
|         | SNHG15              | Activated Chemokine | 1.294979e-168 | 0.9373599 |       | 0.532         | 0.144         | 2.308818e-164 |
|         | RRP15               | Activated Chemokine | 1.775782e-167 | 0.954728  | 0.76  | 0.38          | 3.166042e-163 | 14            |
| CCT5    | Activated Chemokine | 4.504766e-167       | 0.9173791     |           | 0.883 | 0.587         | 8.031548e-163 |               |
|         | SRSF2               | Activated Chemokine | 9.22578e-166  | 0.9644073 |       | 0.719         | 0.34          | 1.644864e-161 |
|         | TIMM13              | Activated Chemokine | 5.730151e-164 | 0.9464242 |       | 0.797         | 0.447         | 1.021629e-159 |
|         | DDX18               | Activated Chemokine | 1.427155e-162 | 1.057728  | 0.583 | 0.188         | 2.544475e-158 | 14            |
| YBX3    | Activated Chemokine | 1.527417e-161       | 0.9753923     |           | 0.618 | 0.247         | 2.723231e-157 |               |
|         | GSPT1               | Activated Chemokine | 9.95223e-160  | -2.273527 |       | 0.148         | 0.497         | 1.774383e-155 |
|         | LTB                 | Activated Chemokine | 2.471065e-159 | 0.9341671 |       | 0.594         | 0.216         | 4.405661e-155 |
|         | DCAF13              | Activated Chemokine | 6.80486e-159  | 0.9462866 |       | 0.786         | 0.436         | 1.213238e-154 |
|         | C1QBP               | Activated Chemokine | 7.981555e-159 | 0.9688741 |       | 0.374         | 0.067         | 1.423032e-154 |
|         | TRAF1               | Activated Chemokine | 1.421998e-158 | 0.9463402 |       | 0.449         | 0.118         | 2.53528e-154  |
|         | SLC1A5              | Activated Chemokine | 1.667384e-158 | 0.9179535 |       | 0.474         | 0.134         | 2.972779e-154 |
|         | NIP7                | Activated Chemokine | 1.181146e-157 | 1.13056   | 0.734 | 0.383         | 2.105865e-153 | 14            |
| EIF5A   | Activated Chemokine | 1.803764e-156       | 0.7589665     |           | 0.301 | 0.042         | 3.215931e-152 |               |
|         | RCN1                | Activated Chemokine | 2.330761e-156 | 0.9465051 |       | 0.463         | 0.108         | 4.155513e-152 |
|         | SLAMF1              | Activated Chemokine | 1.733279e-154 | 0.770425  | 0.954 | 0.742         | 3.090263e-150 | 14            |

|          |                     |               |           |       |       |               |    |
|----------|---------------------|---------------|-----------|-------|-------|---------------|----|
| HSP90AA1 | Activated Chemokine | 3.58467e-154  | 0.9576919 | 0.528 | 0.17  | 6.391109e-150 | 14 |
| ABCE1    | Activated Chemokine | 2.181892e-153 | 0.9664132 | 0.486 | 0.138 | 3.890095e-149 | 14 |
| ARL8B    | Activated Chemokine | 2.681975e-153 | -1.562297 | 0.472 | 0.757 | 4.781694e-149 | 14 |
| CXCR4    | Activated Chemokine | 3.341433e-153 | 1.086716  | 0.562 | 0.162 | 5.957441e-149 | 14 |
| TNFRSF18 | Activated Chemokine | 1.967594e-152 | 0.9144614 | 0.564 | 0.209 | 3.508024e-148 | 14 |
| MRPL12   | Activated Chemokine | 6.878347e-151 | 0.9646463 | 0.765 | 0.391 | 1.226341e-146 | 14 |
| REL      | Activated Chemokine | 7.285502e-151 | 0.878341  | 0.507 | 0.158 | 1.298932e-146 | 14 |
| ETF1     | Activated Chemokine | 2.09228e-150  | -0.895511 | 0.949 | 0.986 | 3.730326e-146 | 14 |
| TMSB10   | Activated Chemokine | 9.629326e-150 | -1.218303 | 0.5   | 0.783 | 1.716812e-145 | 14 |
| ARHGDI8  | Activated Chemokine | 1.535606e-149 | 0.975632  | 0.533 | 0.176 | 2.737831e-145 | 14 |
| FKBP4    | Activated Chemokine | 1.743222e-149 | 0.9331275 | 0.493 | 0.142 | 3.10799e-145  | 14 |
| PUM3     | Activated Chemokine | 7.966591e-149 | 0.8648367 | 0.817 | 0.471 | 1.420363e-144 | 14 |
| RSL1D1   | Activated Chemokine | 9.968825e-148 | 0.9131738 | 0.595 | 0.229 | 1.777342e-143 | 14 |
| HNRNPAB  | Activated Chemokine | 2.663241e-146 | 0.9903444 | 0.619 | 0.232 | 4.748293e-142 | 14 |
| PHACTR1  | Activated Chemokine | 5.569256e-146 | 0.9241191 | 0.66  | 0.287 | 9.929427e-142 | 14 |
| PDCD5    | Activated Chemokine | 4.824892e-145 | -1.152247 | 0.658 | 0.871 | 8.602299e-141 | 14 |
| CD79A    | Activated Chemokine | 8.01411e-145  | 0.6925192 | 0.956 | 0.755 | 1.428836e-140 | 14 |
| PSMA7    | Activated Chemokine | 1.226092e-144 | 0.7393487 | 0.913 | 0.639 | 2.185999e-140 | 14 |
| SNRPG    | Activated Chemokine | 1.515643e-144 | 0.913131  | 0.572 | 0.22  | 2.702239e-140 | 14 |
| MRPL3    | Activated Chemokine | 2.898071e-140 | 0.3496039 | 0.964 | 0.799 | 5.166971e-136 | 14 |
| RPS26    | Activated Chemokine | 2.090825e-139 | 0.8490143 | 0.767 | 0.419 | 3.727731e-135 | 14 |
| CCT4     | Activated Chemokine | 1.650601e-138 | 0.6410932 | 0.229 | 0.021 | 2.942856e-134 | 14 |
| SEMA7A   | Activated Chemokine | 1.089962e-137 | 0.9019856 | 0.574 | 0.211 | 1.943293e-133 | 14 |
| TRAF4    | Activated Chemokine | 1.939713e-136 | -1.121059 | 0.631 | 0.853 | 3.458315e-132 | 14 |
| CD37     | Activated Chemokine | 4.913048e-136 | 0.7916011 | 0.889 | 0.603 | 8.759474e-132 | 14 |



|               |          |           |           |           |       |       |               |        |
|---------------|----------|-----------|-----------|-----------|-------|-------|---------------|--------|
| 6.64178e-136  | RSL24D1  | Activated | Chemokine | 0.8673024 | 0.576 | 0.228 | 1.184163e-131 | 14     |
| 8.735197e-136 | EIF2S1   | Activated | Chemokine | -1.256265 | 0.529 | 0.781 | 1.557398e-131 | 14     |
| 6.294719e-135 | HLA-DPB1 | Activated | Chemokine | 0.7492195 | 0.884 | 0.601 | 1.122286e-130 | 14     |
| 1.572743e-134 | POMP     | Activated | Chemokine | 0.7357289 | 0.319 | 0.058 | 2.804043e-130 | 14     |
| 4.111275e-134 | METTL1   | Activated | Chemokine | 0.8070133 | 0.852 | 0.564 | 7.329993e-130 | 14     |
| 1.487784e-133 | RBM8A    | Activated | Chemokine | 0.8941084 | 0.601 | 0.242 | 2.652571e-129 | 14     |
| 4.117978e-132 | GARS     | Activated | Chemokine | 0.6848748 | 0.941 | 0.739 | 7.341943e-128 | 14     |
| 1.510581e-131 | CHCHD2   | Activated | Chemokine | 1.094636  | 0.319 | 0.059 | 2.693214e-127 | 14 NPW |
| 7.957063e-131 |          | Activated | Chemokine | -1.227547 | 0.175 | 0.499 | 1.418665e-126 | 14     |
| 6.816245e-130 | CYTIP    | Activated | Chemokine | 0.6430973 | 0.217 | 0.025 | 1.215268e-125 | 14     |
| 1.293008e-129 | MFSD2A   | Activated | Chemokine | 0.8223504 | 0.464 | 0.147 | 2.305305e-125 | 14     |
| 1.311089e-129 | PAICS    | Activated | Chemokine | 0.8333092 | 0.383 | 0.089 | 2.337541e-125 | 14     |
| 3.573957e-128 | STAT5A   | Activated | Chemokine | -1.45359  | 0.22  | 0.542 | 6.372008e-124 | 14     |
| 5.101631e-128 | ISG20    | Activated | Chemokine | 0.8467029 | 0.659 | 0.297 | 9.095698e-124 | 14     |
| 1.341248e-127 | TMEM147  | Activated | Chemokine | 0.6233491 | 0.979 | 0.881 | 2.391311e-123 | 14     |
| 3.690063e-127 | H3F3B    | Activated | Chemokine | 0.8514978 | 0.571 | 0.225 | 6.579013e-123 | 14     |
| 2.673111e-126 | CDK4     | Activated | Chemokine | 0.9019088 | 0.499 | 0.174 | 4.765889e-122 | 14     |
| 2.754536e-125 | CMSS1    | Activated | Chemokine | 0.9148976 | 0.589 | 0.263 | 4.911063e-121 | 14     |
| 5.863999e-125 | SMS      | Activated | Chemokine | 0.8331827 | 0.582 | 0.222 | 1.045492e-120 | 14     |
| 3.122506e-124 | CKS2     | Activated | Chemokine | -1.095412 | 0.672 | 0.873 | 5.567117e-120 | 14     |
| 4.298871e-124 | CD52     | Activated | Chemokine | 0.8098836 | 0.462 | 0.154 | 7.664458e-120 | 14     |
| 1.676764e-123 | DCUN1D5  | Activated | Chemokine | 0.8333715 | 0.717 | 0.385 | 2.989503e-119 | 14     |
| 6.528631e-122 | PHB      | Activated | Chemokine | 0.7447353 | 0.386 | 0.094 | 1.16399e-117  | 14     |
| 1.212341e-121 | RRS1     | Activated | Chemokine | 0.793866  | 0.857 | 0.579 | 2.161482e-117 | 14     |
| 6.576753e-121 | EIF2S2   | Activated | Chemokine | 0.8194094 | 0.691 | 0.36  | 1.172569e-116 | 14     |

|               |                     |       |       |               |    |  |
|---------------|---------------------|-------|-------|---------------|----|--|
| PFDN2         | Activated Chemokine |       |       |               |    |  |
| 8.198273e-121 | 0.7212174           | 0.356 | 0.081 | 1.46167e-116  | 14 |  |
| TSR1          | Activated Chemokine |       |       |               |    |  |
| 1.6741e-120   | 0.7615992           | 0.789 | 0.449 | 2.984752e-116 | 14 |  |
| SFPQ          | Activated Chemokine |       |       |               |    |  |
| 1.411679e-119 | 0.8182648           | 0.485 | 0.158 | 2.516883e-115 | 14 |  |
| C8orf33       | Activated Chemokine |       |       |               |    |  |
| 1.442937e-119 | 0.8176178           | 0.73  | 0.412 | 2.572613e-115 | 14 |  |
| EIF6          | Activated Chemokine |       |       |               |    |  |
| 1.661558e-119 | 0.5936              | 0.925 | 0.659 | 2.962391e-115 | 14 |  |
| TUBA1B        | Activated Chemokine |       |       |               |    |  |
| 3.199652e-117 | 0.8142784           | 0.534 | 0.193 | 5.70466e-113  | 14 |  |
| NPM3          | Activated Chemokine |       |       |               |    |  |
| 4.257448e-117 | 0.6675515           | 0.897 | 0.65  | 7.590604e-113 | 14 |  |
| PSMB1         | Activated Chemokine |       |       |               |    |  |
| 1.391756e-116 | 0.7174484           | 0.194 | 0.022 | 2.481362e-112 | 14 |  |
| NR4A1         | Activated Chemokine |       |       |               |    |  |
| 2.017238e-115 | 0.7881208           | 0.609 | 0.273 | 3.596534e-111 | 14 |  |
| PSMD14        | Activated Chemokine |       |       |               |    |  |
| 3.289563e-114 | 0.6304116           | 0.276 | 0.044 | 5.864962e-110 | 14 |  |
| PLK3          | Activated Chemokine |       |       |               |    |  |
| 1.518357e-113 | 0.813135            | 0.476 | 0.165 | 2.707078e-109 | 14 |  |
| ASNS          | Activated Chemokine |       |       |               |    |  |
| 2.952356e-113 | 0.7548022           | 0.738 | 0.41  | 5.263755e-109 | 14 |  |
| NUDC          | Activated Chemokine |       |       |               |    |  |
| 5.879114e-113 | 0.7850334           | 0.63  | 0.309 | 1.048187e-108 | 14 |  |
| TCP1          | Activated Chemokine |       |       |               |    |  |
| 1.668778e-112 | 0.7667071           | 0.662 | 0.332 | 2.975264e-108 | 14 |  |
| STRAP         | Activated Chemokine |       |       |               |    |  |
| 4.261182e-112 | 0.7497056           | 0.449 | 0.134 | 7.597261e-108 | 14 |  |
| TM2D3         | Activated Chemokine |       |       |               |    |  |
| 1.033354e-111 | 0.7738003           | 0.525 | 0.199 | 1.842366e-107 | 14 |  |
| BRIX1         | Activated Chemokine |       |       |               |    |  |
| 1.565491e-110 | 0.7742381           | 0.564 | 0.244 | 2.791113e-106 | 14 |  |
| NAA20         | Activated Chemokine |       |       |               |    |  |
| 2.504856e-110 | 0.6730069           | 0.318 | 0.071 | 4.465908e-106 | 14 |  |
| RRP9          | Activated Chemokine |       |       |               |    |  |
| 2.662919e-110 | 0.7453602           | 0.445 | 0.144 | 4.747717e-106 | 14 |  |
| GNL2          | Activated Chemokine |       |       |               |    |  |
| 2.91252e-110  | 0.7712259           | 0.601 | 0.267 | 5.192733e-106 | 14 |  |
| NDUFAF8       | Activated Chemokine |       |       |               |    |  |
| 1.027818e-109 | 0.7536049           | 0.763 | 0.462 | 1.832496e-105 | 14 |  |
| SNRPF         | Activated Chemokine |       |       |               |    |  |
| 1.476447e-109 | 0.7370671           | 0.74  | 0.421 | 2.632357e-105 | 14 |  |
| DNAJA1        | Activated Chemokine |       |       |               |    |  |
| 1.740235e-109 | 0.7394924           | 0.665 | 0.331 | 3.102665e-105 | 14 |  |
| EIF1AX        | Activated Chemokine |       |       |               |    |  |
| 6.849459e-108 | 0.7909156           | 0.467 | 0.157 | 1.22119e-103  | 14 |  |
| NFKB1         | Activated Chemokine |       |       |               |    |  |
| 8.982287e-108 | 0.7318569           | 0.532 | 0.219 | 1.601452e-103 | 14 |  |

|               |                     |       |       |               |    |  |
|---------------|---------------------|-------|-------|---------------|----|--|
| TIMM17A       | Activated Chemokine |       |       |               |    |  |
| 1.05299e-106  | 0.6341355           | 0.228 | 0.033 | 1.877376e-102 | 14 |  |
| TNFAIP3       | Activated Chemokine |       |       |               |    |  |
| 1.156e-106    | 0.751939            | 0.624 | 0.297 | 2.061032e-102 | 14 |  |
| PSMD11        | Activated Chemokine |       |       |               |    |  |
| 2.699587e-106 | 0.8822813           | 0.427 | 0.129 | 4.813094e-102 | 14 |  |
| PSAT1         | Activated Chemokine |       |       |               |    |  |
| 5.069412e-106 | 0.6547758           | 0.272 | 0.058 | 9.038255e-102 | 14 |  |
| IL21R         | Activated Chemokine |       |       |               |    |  |
| 1.255861e-104 | 0.7937047           | 0.437 | 0.15  | 2.239075e-100 | 14 |  |
| NAMPT         | Activated Chemokine |       |       |               |    |  |
| 1.376786e-104 | 0.4157065           | 0.994 | 0.976 | 2.454673e-100 | 14 |  |
| RPS24         | Activated Chemokine |       |       |               |    |  |
| 1.198644e-103 | 0.6805005           | 0.826 | 0.543 | 2.137063e-99  | 14 |  |
| PSMA1         | Activated Chemokine |       |       |               |    |  |
| 3.840872e-102 | -0.7979923          | 0.977 | 0.989 | 6.84789e-98   | 14 |  |
| CD74          | Activated Chemokine |       |       |               |    |  |
| 3.899737e-102 | 0.7584676           | 0.508 | 0.186 | 6.952841e-98  | 14 |  |
| ESF1          | Activated Chemokine |       |       |               |    |  |
| 4.664956e-102 | 0.5726046           | 0.153 | 0.012 | 8.317151e-98  | 14 |  |
| EGR3          | Activated Chemokine |       |       |               |    |  |
| 1.897462e-101 | 0.6753249           | 0.834 | 0.566 | 3.382985e-97  | 14 |  |
| PARK7         | Activated Chemokine |       |       |               |    |  |
| 2.38456e-101  | 0.7167874           | 0.509 | 0.203 | 4.251431e-97  | 14 |  |
| EEF1E1        | Activated Chemokine |       |       |               |    |  |
| 2.152392e-100 | 0.5828736           | 0.256 | 0.051 | 3.8375e-96    | 14 |  |
| CTPS1         | Activated Chemokine |       |       |               |    |  |
| 2.616828e-100 | 0.7142319           | 0.662 | 0.339 | 4.665542e-96  | 14 |  |
| ABRACL        | Activated Chemokine |       |       |               |    |  |
| 3.289474e-100 | 0.571246            | 0.257 | 0.044 | 5.864804e-96  | 14 |  |
| SLC38A5       | Activated Chemokine |       |       |               |    |  |
| 4.238774e-100 | 0.6376103           | 0.342 | 0.086 | 7.55731e-96   | 14 |  |
| SLC25A33      | Activated Chemokine |       |       |               |    |  |
| 5.638905e-100 | 0.8325958           | 0.256 | 0.05  | 1.00536e-95   | 14 |  |
| HES1          | Activated Chemokine |       |       |               |    |  |
| 1.664375e-99  | 0.6329371           | 0.882 | 0.647 | 2.967414e-95  | 14 |  |
| UBE2D3        | Activated Chemokine |       |       |               |    |  |
| 5.603146e-99  | 0.9454186           | 0.53  | 0.212 | 9.989849e-95  | 14 |  |
| GBP2          | Activated Chemokine |       |       |               |    |  |
| 8.540027e-99  | -1.196069           | 0.065 | 0.309 | 1.522601e-94  | 14 |  |
| CD27          | Activated Chemokine |       |       |               |    |  |
| 1.872532e-98  | 0.7096852           | 0.509 | 0.197 | 3.338537e-94  | 14 |  |
| NIPA2         | Activated Chemokine |       |       |               |    |  |
| 2.831024e-98  | 0.5938349           | 0.269 | 0.052 | 5.047433e-94  | 14 |  |
| WDR3          | Activated Chemokine |       |       |               |    |  |
| 5.863201e-98  | 0.7219861           | 0.547 | 0.23  | 1.04535e-93   | 14 |  |
| AMD1          | Activated Chemokine |       |       |               |    |  |
| 7.325739e-98  | 0.680475            | 0.718 | 0.396 | 1.306106e-93  | 14 |  |
| BZW1          | Activated Chemokine |       |       |               |    |  |
| 9.582361e-98  | 0.6849637           | 0.439 | 0.146 | 1.708439e-93  | 14 |  |

|              |         |           |           |            |       |       |              |    |
|--------------|---------|-----------|-----------|------------|-------|-------|--------------|----|
| 1.719952e-97 | NDUFAF4 | Activated | Chemokine | 0.6802637  | 0.774 | 0.468 | 3.066502e-93 | 14 |
| 9.897736e-97 | PRELID1 | Activated | Chemokine | 0.7003631  | 0.378 | 0.119 | 1.764667e-92 | 14 |
| 1.106681e-96 | BZW2    | Activated | Chemokine | 0.6990323  | 0.691 | 0.382 | 1.973102e-92 | 14 |
| 2.225908e-96 | NOL7    | Activated | Chemokine | 0.7239419  | 0.405 | 0.128 | 3.968571e-92 | 14 |
| 1.079145e-95 | NDUFAF2 | Activated | Chemokine | 0.6061044  | 0.306 | 0.076 | 1.924007e-91 | 14 |
| 1.093996e-95 | YRDC    | Activated | Chemokine | 0.6338427  | 0.31  | 0.07  | 1.950485e-91 | 14 |
| 2.582415e-95 | MTHFD1L | Activated | Chemokine | -0.4909961 | 1     | 1     | 4.604189e-91 | 14 |
| 2.847818e-95 | RPS27   | Activated | Chemokine | 0.5933811  | 0.883 | 0.614 | 5.077374e-91 | 14 |
| 8.552057e-95 | SUB1    | Activated | Chemokine | 0.6367608  | 0.35  | 0.1   | 1.524746e-90 | 14 |
| 1.371131e-94 | AIMP2   | Activated | Chemokine | 0.7672758  | 0.662 | 0.367 | 2.444589e-90 | 14 |
| 7.862593e-94 | UBE2B   | Activated | Chemokine | 0.6396183  | 0.854 | 0.599 | 1.401822e-89 | 14 |
| 1.493131e-93 | NOP10   | Activated | Chemokine | 0.7197517  | 0.574 | 0.26  | 2.662103e-89 | 14 |
| 3.946696e-92 | CEBPZ   | Activated | Chemokine | 0.680293   | 0.763 | 0.483 | 7.036564e-88 | 14 |
| 6.518945e-92 | CCT3    | Activated | Chemokine | 0.6629349  | 0.825 | 0.569 | 1.162263e-87 | 14 |
| 9.148056e-92 | APRT    | Activated | Chemokine | 0.7238407  | 0.877 | 0.631 | 1.631007e-87 | 14 |
| 2.326141e-91 | SET     | Activated | Chemokine | 0.6584386  | 0.345 | 0.098 | 4.147278e-87 | 14 |
| 4.06204e-91  | RIOK1   | Activated | Chemokine | 0.7186427  | 0.589 | 0.283 | 7.242212e-87 | 14 |
| 5.390475e-91 | DCTPP1  | Activated | Chemokine | 0.670025   | 0.722 | 0.424 | 9.610678e-87 | 14 |
| 1.504049e-90 | ZNF706  | Activated | Chemokine | 0.6345706  | 0.783 | 0.497 | 2.681569e-86 | 14 |
| 2.564496e-90 | EIF3I   | Activated | Chemokine | 0.6260745  | 0.837 | 0.558 | 4.57224e-86  | 14 |
| 7.075581e-90 | SNRPB   | Activated | Chemokine | 0.5839403  | 0.857 | 0.591 | 1.261505e-85 | 14 |
| 1.328707e-89 | SEC61B  | Activated | Chemokine | 0.6425433  | 0.433 | 0.155 | 2.368952e-85 | 14 |
| 1.331868e-89 | POLR2H  | Activated | Chemokine | 0.6508916  | 0.678 | 0.367 | 2.374587e-85 | 14 |
| 2.15628e-89  | PSMC3   | Activated | Chemokine | 0.6742233  | 0.65  | 0.341 | 3.844431e-85 | 14 |
| 3.149994e-89 | ZC3H15  | Activated | Chemokine | 0.6894137  | 0.521 | 0.228 | 5.616125e-85 | 14 |

|              |           |           |       |              |    |  |  |
|--------------|-----------|-----------|-------|--------------|----|--|--|
| BUD23        | Activated | Chemokine |       |              |    |  |  |
| 4.625117e-89 | 0.7670578 | 0.577     | 0.269 | 8.246122e-85 | 14 |  |  |
| HSPA5        | Activated | Chemokine |       |              |    |  |  |
| 6.005309e-89 | 0.5631129 | 0.883     | 0.626 | 1.070687e-84 | 14 |  |  |
| COX7B        | Activated | Chemokine |       |              |    |  |  |
| 7.303558e-89 | 0.6928314 | 0.535     | 0.235 | 1.302151e-84 | 14 |  |  |
| POLD2        | Activated | Chemokine |       |              |    |  |  |
| 9.428831e-89 | 0.6729419 | 0.724     | 0.437 | 1.681066e-84 | 14 |  |  |
| CCT7         | Activated | Chemokine |       |              |    |  |  |
| 4.297475e-88 | 0.6232402 | 0.694     | 0.388 | 7.661968e-84 | 14 |  |  |
| NDUFAB1      | Activated | Chemokine |       |              |    |  |  |
| 5.70549e-88  | 0.648711  | 0.19      | 0.028 | 1.017232e-83 | 14 |  |  |
| NR4A2        | Activated | Chemokine |       |              |    |  |  |
| 1.009421e-87 | 0.5672336 | 0.869     | 0.628 | 1.799697e-83 | 14 |  |  |
| PSMA4        | Activated | Chemokine |       |              |    |  |  |
| 1.405348e-87 | 0.641864  | 0.448     | 0.174 | 2.505595e-83 | 14 |  |  |
| FARSA        | Activated | Chemokine |       |              |    |  |  |
| 1.678049e-87 | 0.5552615 | 0.245     | 0.058 | 2.991794e-83 | 14 |  |  |
| BCL2L1       | Activated | Chemokine |       |              |    |  |  |
| 1.829039e-87 | 0.64779   | 0.718     | 0.412 | 3.260994e-83 | 14 |  |  |
| TOMM22       | Activated | Chemokine |       |              |    |  |  |
| 2.142486e-87 | 0.689231  | 0.394     | 0.122 | 3.819838e-83 | 14 |  |  |
| CCDC58       | Activated | Chemokine |       |              |    |  |  |
| 2.51903e-87  | 0.5426819 | 0.278     | 0.061 | 4.491178e-83 | 14 |  |  |
| WDR12        | Activated | Chemokine |       |              |    |  |  |
| 7.501927e-87 | 0.6580045 | 0.748     | 0.445 | 1.337519e-82 | 14 |  |  |
| VDAC1        | Activated | Chemokine |       |              |    |  |  |
| 8.6903e-87   | 0.6525444 | 0.726     | 0.422 | 1.549394e-82 | 14 |  |  |
| NSA2         | Activated | Chemokine |       |              |    |  |  |
| 1.073747e-86 | 0.7254898 | 0.551     | 0.248 | 1.914384e-82 | 14 |  |  |
| NARS         | Activated | Chemokine |       |              |    |  |  |
| 1.249583e-86 | 0.5803785 | 0.877     | 0.639 | 2.227882e-82 | 14 |  |  |
| HNRNPC       | Activated | Chemokine |       |              |    |  |  |
| 1.763987e-86 | 0.652009  | 0.683     | 0.392 | 3.145012e-82 | 14 |  |  |
| PSMA3        | Activated | Chemokine |       |              |    |  |  |
| 4.675008e-86 | 0.6315685 | 0.755     | 0.47  | 8.335071e-82 | 14 |  |  |
| FUS          | Activated | Chemokine |       |              |    |  |  |
| 6.318859e-86 | 0.6506652 | 0.508     | 0.208 | 1.126589e-81 | 14 |  |  |
| EMG1         | Activated | Chemokine |       |              |    |  |  |
| 7.239603e-86 | 0.6711816 | 0.475     | 0.186 | 1.290749e-81 | 14 |  |  |
| WDR74        | Activated | Chemokine |       |              |    |  |  |
| 1.217928e-85 | 0.6282621 | 0.679     | 0.381 | 2.171443e-81 | 14 |  |  |
| MRPL20       | Activated | Chemokine |       |              |    |  |  |
| 1.719653e-85 | 0.6690912 | 0.478     | 0.196 | 3.065969e-81 | 14 |  |  |
| MAP2K3       | Activated | Chemokine |       |              |    |  |  |
| 1.787662e-85 | 0.6447141 | 0.465     | 0.172 | 3.187223e-81 | 14 |  |  |
| DNPEP        | Activated | Chemokine |       |              |    |  |  |
| 2.448456e-85 | 0.5989704 | 0.796     | 0.526 | 4.365351e-81 | 14 |  |  |
| SNRPB2       | Activated | Chemokine |       |              |    |  |  |
| 3.19645e-85  | 0.7898222 | 0.503     | 0.211 | 5.698951e-81 | 14 |  |  |

|              |          |           |           |            |       |       |              |    |
|--------------|----------|-----------|-----------|------------|-------|-------|--------------|----|
| 3.478192e-85 | EIF4EBP1 | Activated | Chemokine | 0.8779946  | 0.596 | 0.334 | 6.201269e-81 | 14 |
| 6.399549e-85 | LRMP     | Activated | Chemokine | 0.5753685  | 0.311 | 0.08  | 1.140976e-80 | 14 |
| 6.403364e-85 | UTP4     | Activated | Chemokine | 0.6468971  | 0.488 | 0.217 | 1.141656e-80 | 14 |
| 1.463148e-84 | PSMB5    | Activated | Chemokine | 0.6922805  | 0.594 | 0.271 | 2.608647e-80 | 14 |
| 3.288278e-84 | WARS     | Activated | Chemokine | 0.6390111  | 0.386 | 0.13  | 5.862671e-80 | 14 |
| 3.676032e-84 | PES1     | Activated | Chemokine | 0.4555442  | 0.976 | 0.893 | 6.553998e-80 | 14 |
| 1.195754e-83 | PPIA     | Activated | Chemokine | 0.6432711  | 0.749 | 0.483 | 2.13191e-79  | 14 |
| 1.424814e-83 | CCT8     | Activated | Chemokine | 0.5414772  | 0.223 | 0.045 | 2.540301e-79 | 14 |
| 3.634116e-83 | CCDC86   | Activated | Chemokine | 0.7978881  | 0.627 | 0.308 | 6.479265e-79 | 14 |
| 1.094184e-82 | CD69     | Activated | Chemokine | 0.6663163  | 0.652 | 0.368 | 1.950821e-78 | 14 |
| 4.163798e-82 | PSMC1    | Activated | Chemokine | 0.6146695  | 0.385 | 0.132 | 7.423636e-78 | 14 |
| 7.854772e-82 | PSME3    | Activated | Chemokine | 0.603256   | 0.802 | 0.55  | 1.400427e-77 | 14 |
| 2.231738e-81 | SNU13    | Activated | Chemokine | -1.008072  | 0.267 | 0.521 | 3.978966e-77 | 14 |
| 3.837149e-81 | LSP1     | Activated | Chemokine | 0.5751474  | 0.785 | 0.496 | 6.841253e-77 | 14 |
| 6.866803e-81 | XRCC5    | Activated | Chemokine | 0.6311356  | 0.401 | 0.148 | 1.224282e-76 | 14 |
| 8.595066e-81 | UTP11    | Activated | Chemokine | 0.6455726  | 0.411 | 0.153 | 1.532414e-76 | 14 |
| 1.979418e-80 | DNAJC2   | Activated | Chemokine | 0.6077552  | 0.373 | 0.13  | 3.529104e-76 | 14 |
| 4.599421e-80 | RRP1     | Activated | Chemokine | 0.6520407  | 0.541 | 0.257 | 8.200308e-76 | 14 |
| 6.099265e-80 | SYNCRIP  | Activated | Chemokine | -0.9868487 | 0.15  | 0.394 | 1.087438e-75 | 14 |
| 7.995815e-80 | EVI2B    | Activated | Chemokine | 0.6786193  | 0.53  | 0.246 | 1.425574e-75 | 14 |
| 1.095198e-79 | RRP7A    | Activated | Chemokine | -1.079422  | 0.257 | 0.494 | 1.952629e-75 | 14 |
| 1.866036e-79 | UCP2     | Activated | Chemokine | 0.6346522  | 0.429 | 0.159 | 3.326955e-75 | 14 |
| 2.110797e-79 | NXT1     | Activated | Chemokine | 0.6212334  | 0.643 | 0.356 | 3.763341e-75 | 14 |
| 2.670492e-79 | ELOC     | Activated | Chemokine | 0.6214791  | 0.466 | 0.187 | 4.76122e-75  | 14 |
| 4.177324e-79 | TRMT10C  | Activated | Chemokine | 0.6523487  | 0.852 | 0.63  | 7.447752e-75 | 14 |

|              |            |           |       |              |    |  |
|--------------|------------|-----------|-------|--------------|----|--|
| HERPUD1      | Activated  | Chemokine |       |              |    |  |
| 1.222573e-78 | 0.6278322  | 0.699     | 0.421 | 2.179725e-74 | 14 |  |
| MINOS1       | Activated  | Chemokine |       |              |    |  |
| 1.521804e-78 | 0.6351861  | 0.648     | 0.364 | 2.713224e-74 | 14 |  |
| PSMD7        | Activated  | Chemokine |       |              |    |  |
| 2.77748e-78  | -2.304236  | 0.195     | 0.408 | 4.951969e-74 | 14 |  |
| JCHAIN       | Activated  | Chemokine |       |              |    |  |
| 4.23044e-78  | 0.6103061  | 0.706     | 0.41  | 7.542452e-74 | 14 |  |
| DDX39A       | Activated  | Chemokine |       |              |    |  |
| 7.635387e-78 | 0.5966504  | 0.334     | 0.1   | 1.361313e-73 | 14 |  |
| CD320        | Activated  | Chemokine |       |              |    |  |
| 9.791491e-78 | 0.6261985  | 0.588     | 0.296 | 1.745725e-73 | 14 |  |
| GLRX3        | Activated  | Chemokine |       |              |    |  |
| 1.032564e-77 | 0.5635055  | 0.842     | 0.587 | 1.840959e-73 | 14 |  |
| HNRNPU       | Activated  | Chemokine |       |              |    |  |
| 1.219089e-77 | 0.6663796  | 0.517     | 0.225 | 2.173514e-73 | 14 |  |
| TARS         | Activated  | Chemokine |       |              |    |  |
| 1.712345e-77 | 0.5841051  | 0.361     | 0.117 | 3.052939e-73 | 14 |  |
| ABCF2.1      | Activated  | Chemokine |       |              |    |  |
| 2.179315e-77 | -1.078008  | 0.158     | 0.357 | 3.8855e-73   | 14 |  |
| TXNIP        | Activated  | Chemokine |       |              |    |  |
| 3.056732e-77 | 0.6413686  | 0.569     | 0.281 | 5.449848e-73 | 14 |  |
| AIMP1        | Activated  | Chemokine |       |              |    |  |
| 5.447769e-77 | 0.4936002  | 0.17      | 0.019 | 9.712827e-73 | 14 |  |
| SPRY1        | Activated  | Chemokine |       |              |    |  |
| 9.81945e-77  | 0.562799   | 0.849     | 0.605 | 1.75071e-72  | 14 |  |
| PTGES3       | Activated  | Chemokine |       |              |    |  |
| 1.570683e-76 | -0.6538552 | 1         | 1     | 2.800371e-72 | 14 |  |
| MALAT1       | Activated  | Chemokine |       |              |    |  |
| 2.955914e-76 | 0.5544726  | 0.318     | 0.091 | 5.2701e-72   | 14 |  |
| NFKBIB       | Activated  | Chemokine |       |              |    |  |
| 2.970674e-76 | -1.014831  | 0.279     | 0.509 | 5.296414e-72 | 14 |  |
| TSC22D3      | Activated  | Chemokine |       |              |    |  |
| 3.054394e-76 | 0.5890637  | 0.385     | 0.133 | 5.445679e-72 | 14 |  |
| ZPR1         | Activated  | Chemokine |       |              |    |  |
| 4.098596e-76 | 0.5414414  | 0.859     | 0.634 | 7.307387e-72 | 14 |  |
| ATP5MD       | Activated  | Chemokine |       |              |    |  |
| 1.383449e-75 | 0.6115687  | 0.748     | 0.491 | 2.466551e-71 | 14 |  |
| TUFM         | Activated  | Chemokine |       |              |    |  |
| 1.695599e-75 | 0.6163568  | 0.584     | 0.307 | 3.023084e-71 | 14 |  |
| STOML2       | Activated  | Chemokine |       |              |    |  |
| 1.88443e-75  | 0.6742963  | 0.421     | 0.156 | 3.35975e-71  | 14 |  |
| CD58         | Activated  | Chemokine |       |              |    |  |
| 3.630886e-75 | 0.6249341  | 0.451     | 0.198 | 6.473508e-71 | 14 |  |
| UBALD2       | Activated  | Chemokine |       |              |    |  |
| 3.701231e-75 | 0.6282154  | 0.361     | 0.103 | 6.598926e-71 | 14 |  |
| SNX9         | Activated  | Chemokine |       |              |    |  |
| 4.78105e-75  | 0.6143762  | 0.391     | 0.148 | 8.524134e-71 | 14 |  |
| GRPEL1       | Activated  | Chemokine |       |              |    |  |
| 5.750392e-75 | 0.6463506  | 0.429     | 0.166 | 1.025237e-70 | 14 |  |

|              |           |           |       |              |    |  |
|--------------|-----------|-----------|-------|--------------|----|--|
| TIMM44       | Activated | Chemokine |       |              |    |  |
| 1.547427e-74 | 0.5152161 | 0.846     | 0.589 | 2.758907e-70 | 14 |  |
| XRCC6        | Activated | Chemokine |       |              |    |  |
| 3.37178e-74  | 0.5894218 | 0.692     | 0.414 | 6.011547e-70 | 14 |  |
| MAG0H        | Activated | Chemokine |       |              |    |  |
| 5.947309e-74 | 0.5621267 | 0.314     | 0.096 | 1.060346e-69 | 14 |  |
| FARSB        | Activated | Chemokine |       |              |    |  |
| 6.704537e-74 | 0.5108102 | 0.858     | 0.635 | 1.195352e-69 | 14 |  |
| ERH          | Activated | Chemokine |       |              |    |  |
| 1.441605e-73 | 0.7904934 | 0.606     | 0.338 | 2.570238e-69 | 14 |  |
| INSIG1       | Activated | Chemokine |       |              |    |  |
| 1.585766e-73 | 0.5458182 | 0.3       | 0.084 | 2.827261e-69 | 14 |  |
| RRP1B        | Activated | Chemokine |       |              |    |  |
| 1.872493e-73 | 0.598348  | 0.589     | 0.307 | 3.338468e-69 | 14 |  |
| EIF4E        | Activated | Chemokine |       |              |    |  |
| 2.214e-73    | 0.5829118 | 0.502     | 0.211 | 3.947341e-69 | 14 |  |
| WDR46        | Activated | Chemokine |       |              |    |  |
| 2.500054e-73 | 0.5790685 | 0.726     | 0.453 | 4.457346e-69 | 14 |  |
| GADD45GIP1   | Activated | Chemokine |       |              |    |  |
| 2.535794e-73 | 0.6332238 | 0.609     | 0.331 | 4.521067e-69 | 14 |  |
| MIF          | Activated | Chemokine |       |              |    |  |
| 4.588938e-73 | 0.5894809 | 0.783     | 0.539 | 8.181617e-69 | 14 |  |
| CNBP         | Activated | Chemokine |       |              |    |  |
| 4.731492e-73 | 0.6242619 | 0.352     | 0.123 | 8.435777e-69 | 14 |  |
| NFATC1       | Activated | Chemokine |       |              |    |  |
| 4.857694e-73 | 0.5274837 | 0.289     | 0.081 | 8.660782e-69 | 14 |  |
| POLR3H       | Activated | Chemokine |       |              |    |  |
| 8.832115e-73 | 0.6378858 | 0.494     | 0.239 | 1.574678e-68 | 14 |  |
| AK2          | Activated | Chemokine |       |              |    |  |
| 1.28718e-72  | 0.5448781 | 0.828     | 0.595 | 2.294913e-68 | 14 |  |
| PSMA2        | Activated | Chemokine |       |              |    |  |
| 1.972398e-72 | 0.5963956 | 0.684     | 0.414 | 3.516588e-68 | 14 |  |
| ADRM1        | Activated | Chemokine |       |              |    |  |
| 3.719307e-72 | 0.6117234 | 0.418     | 0.167 | 6.631153e-68 | 14 |  |
| SNX8         | Activated | Chemokine |       |              |    |  |
| 5.501954e-72 | 0.5914975 | 0.464     | 0.19  | 9.809434e-68 | 14 |  |
| ATIC         | Activated | Chemokine |       |              |    |  |
| 5.696735e-72 | 0.6076243 | 0.14      | 0.017 | 1.015671e-67 | 14 |  |
| TNFRSF4      | Activated | Chemokine |       |              |    |  |
| 5.719696e-72 | 0.4016213 | 0.13      | 0.011 | 1.019765e-67 | 14 |  |
| RAB20        | Activated | Chemokine |       |              |    |  |
| 1.013338e-71 | 0.5774661 | 0.62      | 0.337 | 1.80668e-67  | 14 |  |
| PSMC4        | Activated | Chemokine |       |              |    |  |
| 1.440645e-71 | 0.5725685 | 0.783     | 0.525 | 2.568526e-67 | 14 |  |
| GHITM        | Activated | Chemokine |       |              |    |  |
| 1.635392e-71 | 0.5941861 | 0.532     | 0.26  | 2.91574e-67  | 14 |  |
| MRPS12       | Activated | Chemokine |       |              |    |  |
| 1.794361e-71 | 0.4976835 | 0.198     | 0.039 | 3.199165e-67 | 14 |  |
| CENPV        | Activated | Chemokine |       |              |    |  |
| 2.886477e-71 | 0.5368816 | 0.74      | 0.45  | 5.1463e-67   | 14 |  |



|              |           |           |       |              |    |  |
|--------------|-----------|-----------|-------|--------------|----|--|
| LSM5         | Activated | Chemokine |       |              |    |  |
| 3.162701e-71 | 0.5843758 | 0.312     | 0.108 | 5.638779e-67 | 14 |  |
| DESI1        | Activated | Chemokine |       |              |    |  |
| 4.831668e-71 | 0.5816016 | 0.622     | 0.347 | 8.614381e-67 | 14 |  |
| PHB2         | Activated | Chemokine |       |              |    |  |
| 4.965694e-71 | 0.5047599 | 0.194     | 0.033 | 8.853335e-67 | 14 |  |
| KDM6B        | Activated | Chemokine |       |              |    |  |
| 6.496698e-71 | 0.6917861 | 0.529     | 0.278 | 1.158296e-66 | 14 |  |
| CD82         | Activated | Chemokine |       |              |    |  |
| 6.571061e-71 | 0.4795012 | 0.252     | 0.068 | 1.171554e-66 | 14 |  |
| BYSL         | Activated | Chemokine |       |              |    |  |
| 6.908188e-71 | 0.4746296 | 0.942     | 0.756 | 1.231661e-66 | 14 |  |
| PKM          | Activated | Chemokine |       |              |    |  |
| 7.513704e-71 | 0.6183013 | 0.539     | 0.263 | 1.339618e-66 | 14 |  |
| TIMM10       | Activated | Chemokine |       |              |    |  |
| 7.537222e-71 | 0.6150799 | 0.445     | 0.183 | 1.343811e-66 | 14 |  |
| ATP1A1       | Activated | Chemokine |       |              |    |  |
| 7.893479e-71 | -1.131123 | 0.082     | 0.279 | 1.407328e-66 | 14 |  |
| KLF2         | Activated | Chemokine |       |              |    |  |
| 2.761897e-70 | 0.5828631 | 0.415     | 0.166 | 4.924187e-66 | 14 |  |
| RARS         | Activated | Chemokine |       |              |    |  |
| 3.390439e-70 | 0.5545449 | 0.344     | 0.104 | 6.044814e-66 | 14 |  |
| SRFBP1       | Activated | Chemokine |       |              |    |  |
| 4.241291e-70 | 0.5810826 | 0.65      | 0.376 | 7.561798e-66 | 14 |  |
| TXNL1        | Activated | Chemokine |       |              |    |  |
| 6.034846e-70 | 0.529426  | 0.662     | 0.345 | 1.075953e-65 | 14 |  |
| TUBB4B       | Activated | Chemokine |       |              |    |  |
| 6.282167e-70 | 0.3961395 | 0.988     | 0.925 | 1.120047e-65 | 14 |  |
| HNRNPA1      | Activated | Chemokine |       |              |    |  |
| 7.97596e-70  | 0.5552169 | 0.353     | 0.128 | 1.422034e-65 | 14 |  |
| EXOSC4       | Activated | Chemokine |       |              |    |  |
| 1.025292e-69 | 0.5990444 | 0.463     | 0.204 | 1.827992e-65 | 14 |  |
| DNTTIP2      | Activated | Chemokine |       |              |    |  |
| 1.062114e-69 | 0.5576847 | 0.331     | 0.108 | 1.893643e-65 | 14 |  |
| DIMT1        | Activated | Chemokine |       |              |    |  |
| 1.355104e-69 | 0.5241951 | 0.804     | 0.553 | 2.416015e-65 | 14 |  |
| ATP5PF       | Activated | Chemokine |       |              |    |  |
| 1.930525e-69 | 0.5779081 | 0.55      | 0.28  | 3.441933e-65 | 14 |  |
| MRPS15       | Activated | Chemokine |       |              |    |  |
| 1.950747e-69 | 0.6000146 | 0.495     | 0.23  | 3.477987e-65 | 14 |  |
| MRPL21       | Activated | Chemokine |       |              |    |  |
| 2.71735e-69  | 0.5926351 | 0.505     | 0.235 | 4.844763e-65 | 14 |  |
| ABCF1        | Activated | Chemokine |       |              |    |  |
| 6.473864e-69 | 0.6638122 | 0.605     | 0.32  | 1.154225e-64 | 14 |  |
| PMAIP1       | Activated | Chemokine |       |              |    |  |
| 8.446452e-69 | 0.5735284 | 0.65      | 0.381 | 1.505918e-64 | 14 |  |
| NDUFS6       | Activated | Chemokine |       |              |    |  |
| 1.092851e-68 | 0.5367223 | 0.324     | 0.104 | 1.948444e-64 | 14 |  |
| LTV1         | Activated | Chemokine |       |              |    |  |
| 1.185732e-68 | 0.5638396 | 0.683     | 0.404 | 2.114042e-64 | 14 |  |

|              |          |                     |            |       |       |              |    |
|--------------|----------|---------------------|------------|-------|-------|--------------|----|
| 1.540975e-68 | HNRNPR   | Activated Chemokine | 0.5466213  | 0.676 | 0.398 | 2.747405e-64 | 14 |
| 5.452955e-68 | PSMB2    | Activated Chemokine | 0.58263    | 0.509 | 0.25  | 9.722074e-64 | 14 |
| 5.903415e-68 | EIF4A3   | Activated Chemokine | 0.5392605  | 0.86  | 0.604 | 1.05252e-63  | 14 |
| 7.133077e-68 | SYNGR2   | Activated Chemokine | 0.5198999  | 0.824 | 0.582 | 1.271756e-63 | 14 |
| 8.992927e-68 | HNRNPF   | Activated Chemokine | -0.9325409 | 0.189 | 0.409 | 1.603349e-63 | 14 |
| 1.544722e-67 | STX7     | Activated Chemokine | 0.5522006  | 0.718 | 0.439 | 2.754085e-63 | 14 |
| 3.776344e-67 | FBL      | Activated Chemokine | 0.4998883  | 0.27  | 0.072 | 6.732843e-63 | 14 |
| 1.256916e-66 | DPH2     | Activated Chemokine | 0.583067   | 0.433 | 0.187 | 2.240955e-62 | 14 |
| 1.636964e-66 | TFAM     | Activated Chemokine | 0.5496807  | 0.545 | 0.277 | 2.918544e-62 | 14 |
| 3.177553e-66 | MRPS7    | Activated Chemokine | 0.5455052  | 0.666 | 0.387 | 5.665259e-62 | 14 |
| 4.124993e-66 | YWHAE    | Activated Chemokine | 0.5033101  | 0.274 | 0.082 | 7.35445e-62  | 14 |
| 6.390716e-66 | MRPS17   | Activated Chemokine | 0.5636081  | 0.383 | 0.14  | 1.139401e-61 | 14 |
| 1.85994e-65  | PRDX4    | Activated Chemokine | 0.4457712  | 0.161 | 0.023 | 3.316086e-61 | 14 |
| 2.333578e-65 | SERPINE2 | Activated Chemokine | 0.5782775  | 0.477 | 0.222 | 4.160537e-61 | 14 |
| 2.96544e-65  | NOB1     | Activated Chemokine | 0.5359406  | 0.356 | 0.137 | 5.287084e-61 | 14 |
| 3.461334e-65 | FAM207A  | Activated Chemokine | 0.5809179  | 0.525 | 0.27  | 6.171212e-61 | 14 |
| 3.581804e-65 | ATOX1    | Activated Chemokine | 0.5153557  | 0.887 | 0.699 | 6.385999e-61 | 14 |
| 4.313821e-65 | TPI1     | Activated Chemokine | 0.5646891  | 0.463 | 0.211 | 7.691111e-61 | 14 |
| 4.562101e-65 | PSMD1    | Activated Chemokine | 0.3993301  | 0.175 | 0.033 | 8.13377e-61  | 14 |
| 6.766443e-65 | SLC7A5   | Activated Chemokine | 0.5755322  | 0.35  | 0.125 | 1.206389e-60 | 14 |
| 9.525584e-65 | SRPRB    | Activated Chemokine | 0.6156772  | 0.269 | 0.09  | 1.698316e-60 | 14 |
| 1.001764e-64 | FCRL5    | Activated Chemokine | 0.6109758  | 0.57  | 0.302 | 1.786046e-60 | 14 |
| 1.177156e-64 | CALR     | Activated Chemokine | 0.5111618  | 0.24  | 0.056 | 2.098752e-60 | 14 |
| 3.088265e-64 | CD84     | Activated Chemokine | 0.5650504  | 0.573 | 0.312 | 5.506068e-60 | 14 |
| 3.369918e-64 | GTF3C6   | Activated Chemokine | 0.572334   | 0.339 | 0.136 | 6.008227e-60 | 14 |

|        |                     |                     |              |            |       |              |              |              |    |
|--------|---------------------|---------------------|--------------|------------|-------|--------------|--------------|--------------|----|
| RUVBL1 | Activated Chemokine | 5.506553e-64        | 0.54323      | 0.686      | 0.415 | 9.817633e-60 | 14           |              |    |
| APEX1  | Activated Chemokine | 5.917551e-64        | 0.5834904    |            | 0.603 | 0.347        | 1.05504e-59  | 14           |    |
|        | RWDD1               | Activated Chemokine | 6.097505e-64 | 0.5465964  |       | 0.376        | 0.144        | 1.087124e-59 | 14 |
|        | MAGOHB              | Activated Chemokine | 1.340545e-63 | 0.506741   | 0.337 | 0.117        | 2.390058e-59 | 14           |    |
| HSPBP1 | Activated Chemokine | 1.572629e-63        | 0.5859958    |            | 0.525 | 0.269        | 2.803839e-59 | 14           |    |
|        | NCBP2               | Activated Chemokine | 1.590104e-63 | -0.8076437 |       | 0.707        | 0.817        | 2.834996e-59 | 14 |
|        | COR01A              | Activated Chemokine | 3.260275e-63 | 0.3661424  |       | 0.982        | 0.922        | 5.812745e-59 | 14 |
|        | BTF3                | Activated Chemokine | 3.977107e-63 | 0.5729928  |       | 0.404        | 0.176        | 7.090784e-59 | 14 |
|        | PCGF5               | Activated Chemokine | 6.534746e-63 | 0.5379612  |       | 0.7          | 0.437        | 1.16508e-58  | 14 |
|        | RAD23A              | Activated Chemokine | 7.430594e-63 | 0.5197588  |       | 0.69         | 0.44         | 1.324801e-58 | 14 |
|        | PSMB7               | Activated Chemokine | 7.494248e-63 | 0.5881504  |       | 0.415        | 0.177        | 1.336149e-58 | 14 |
|        | TUBA1C              | Activated Chemokine | 1.244346e-62 | 0.5394585  |       | 0.822        | 0.6          | 2.218545e-58 | 14 |
|        | RBM3                | Activated Chemokine | 1.984921e-62 | -0.6824935 |       | 0.779        | 0.884        | 3.538915e-58 | 14 |
|        | MS4A1               | Activated Chemokine | 2.602185e-62 | 0.5239266  |       | 0.338        | 0.125        | 4.639435e-58 | 14 |
|        | TIMM50              | Activated Chemokine | 2.860811e-62 | 0.5618202  |       | 0.569        | 0.306        | 5.100541e-58 | 14 |
|        | AKR1A1              | Activated Chemokine | 3.439773e-62 | 0.4331249  |       | 0.919        | 0.742        | 6.132771e-58 | 14 |
|        | SNRPD2              | Activated Chemokine | 8.109062e-62 | 0.5514406  |       | 0.469        | 0.216        | 1.445765e-57 | 14 |
|        | RPIA                | Activated Chemokine | 1.515268e-61 | 0.5409804  |       | 0.549        | 0.284        | 2.701571e-57 | 14 |
|        | G3BP1               | Activated Chemokine | 3.169084e-61 | 0.4869344  |       | 0.751        | 0.491        | 5.650159e-57 | 14 |
|        | COX5A               | Activated Chemokine | 3.249891e-61 | 0.3031436  |       | 0.996        | 0.986        | 5.79423e-57  | 14 |
|        | RPL14               | Activated Chemokine | 7.86193e-61  | 0.5322401  |       | 0.407        | 0.181        | 1.401703e-56 | 14 |
|        | MRPL36              | Activated Chemokine | 1.299542e-60 | 0.5280877  |       | 0.417        | 0.175        | 2.316953e-56 | 14 |
|        | NOC2L               | Activated Chemokine | 1.629805e-60 | 0.5313685  |       | 0.578        | 0.317        | 2.90578e-56  | 14 |
|        | IMP4                | Activated Chemokine | 1.869823e-60 | 0.5369661  |       | 0.45         | 0.201        | 3.333708e-56 | 14 |
|        | TMEM208             | Activated Chemokine | 1.295561e-59 | 0.520773   | 0.462 | 0.216        | 2.309856e-55 | 14           |    |

|              |                     |       |       |              |    |  |
|--------------|---------------------|-------|-------|--------------|----|--|
| MRPL4        | Activated Chemokine |       |       |              |    |  |
| 1.332546e-59 | 0.5319726           | 0.377 | 0.154 | 2.375796e-55 | 14 |  |
| COA4         | Activated Chemokine |       |       |              |    |  |
| 1.45955e-59  | 0.532147            | 0.524 | 0.269 | 2.602233e-55 | 14 |  |
| MRPL47       | Activated Chemokine |       |       |              |    |  |
| 1.614285e-59 | 0.4984154           | 0.319 | 0.121 | 2.878108e-55 | 14 |  |
| ISOC2        | Activated Chemokine |       |       |              |    |  |
| 2.462558e-59 | 0.5365582           | 0.658 | 0.381 | 4.390495e-55 | 14 |  |
| SHMT2        | Activated Chemokine |       |       |              |    |  |
| 2.497002e-59 | 0.5068699           | 0.327 | 0.119 | 4.451904e-55 | 14 |  |
| TWISTNB      | Activated Chemokine |       |       |              |    |  |
| 3.260856e-59 | -0.9496904          | 0.15  | 0.353 | 5.813781e-55 | 14 |  |
| S100A10      | Activated Chemokine |       |       |              |    |  |
| 4.152303e-59 | -0.7500333          | 0.053 | 0.223 | 7.403142e-55 | 14 |  |
| LY86         | Activated Chemokine |       |       |              |    |  |
| 5.546957e-59 | 0.5775078           | 0.807 | 0.614 | 9.88967e-55  | 14 |  |
| CLEC2D       | Activated Chemokine |       |       |              |    |  |
| 6.314262e-59 | 0.5331251           | 0.397 | 0.17  | 1.12577e-54  | 14 |  |
| SSSCA1       | Activated Chemokine |       |       |              |    |  |
| 7.31498e-59  | 0.497102            | 0.286 | 0.096 | 1.304188e-54 | 14 |  |
| BOP1         | Activated Chemokine |       |       |              |    |  |
| 8.161419e-59 | 0.544885            | 0.387 | 0.163 | 1.455099e-54 | 14 |  |
| SMIM37       | Activated Chemokine |       |       |              |    |  |
| 8.228853e-59 | 0.54512             | 0.442 | 0.203 | 1.467122e-54 | 14 |  |
| MRPS35       | Activated Chemokine |       |       |              |    |  |
| 1.138233e-58 | 0.5440779           | 0.374 | 0.143 | 2.029356e-54 | 14 |  |
| TSEN15       | Activated Chemokine |       |       |              |    |  |
| 1.145994e-58 | 0.5381545           | 0.451 | 0.211 | 2.043194e-54 | 14 |  |
| AATF         | Activated Chemokine |       |       |              |    |  |
| 1.349896e-58 | -0.8069322          | 0.049 | 0.215 | 2.406729e-54 | 14 |  |
| FAM111B      | Activated Chemokine |       |       |              |    |  |
| 1.420903e-58 | 0.5350131           | 0.594 | 0.341 | 2.533329e-54 | 14 |  |
| RBM17        | Activated Chemokine |       |       |              |    |  |
| 2.206679e-58 | 0.4329734           | 0.837 | 0.577 | 3.934288e-54 | 14 |  |
| ANP32B       | Activated Chemokine |       |       |              |    |  |
| 2.718268e-58 | 0.5396063           | 0.545 | 0.287 | 4.8464e-54   | 14 |  |
| SSRP1        | Activated Chemokine |       |       |              |    |  |
| 2.991596e-58 | -1.08656            | 0.33  | 0.468 | 5.333717e-54 | 14 |  |
| S100A6       | Activated Chemokine |       |       |              |    |  |
| 3.154598e-58 | 0.5107086           | 0.726 | 0.483 | 5.624333e-54 | 14 |  |
| EIF3M        | Activated Chemokine |       |       |              |    |  |
| 5.408706e-58 | -0.803658           | 0.084 | 0.279 | 9.643182e-54 | 14 |  |
| NCF1         | Activated Chemokine |       |       |              |    |  |
| 8.312497e-58 | 0.4980562           | 0.379 | 0.152 | 1.482035e-53 | 14 |  |
| TRIAP1       | Activated Chemokine |       |       |              |    |  |
| 9.351575e-58 | 0.4969983           | 0.337 | 0.124 | 1.667292e-53 | 14 |  |
| GRWD1        | Activated Chemokine |       |       |              |    |  |
| 9.454349e-58 | -0.8795911          | 0.174 | 0.368 | 1.685616e-53 | 14 |  |
| RCS1         | Activated Chemokine |       |       |              |    |  |
| 1.407541e-57 | 0.4136952           | 0.888 | 0.678 | 2.509505e-53 | 14 |  |

|              |            |           |       |              |    |  |
|--------------|------------|-----------|-------|--------------|----|--|
| SLC25A3      | Activated  | Chemokine |       |              |    |  |
| 2.703968e-57 | 0.5155861  | 0.217     | 0.067 | 4.820905e-53 | 14 |  |
| BATF         | Activated  | Chemokine |       |              |    |  |
| 3.013444e-57 | 0.5106554  | 0.463     | 0.218 | 5.372669e-53 | 14 |  |
| MRPS23       | Activated  | Chemokine |       |              |    |  |
| 3.158529e-57 | 0.5267654  | 0.504     | 0.256 | 5.631341e-53 | 14 |  |
| HDAC2        | Activated  | Chemokine |       |              |    |  |
| 4.106493e-57 | 0.5020881  | 0.599     | 0.343 | 7.321466e-53 | 14 |  |
| POLR2K       | Activated  | Chemokine |       |              |    |  |
| 4.294957e-57 | 0.5248689  | 0.596     | 0.342 | 7.657478e-53 | 14 |  |
| CYC1         | Activated  | Chemokine |       |              |    |  |
| 5.849627e-57 | 0.577351   | 0.603     | 0.35  | 1.04293e-52  | 14 |  |
| SARS         | Activated  | Chemokine |       |              |    |  |
| 6.245233e-57 | 0.5298035  | 0.628     | 0.377 | 1.113463e-52 | 14 |  |
| ATP6V0B      | Activated  | Chemokine |       |              |    |  |
| 6.485407e-57 | 0.5448871  | 0.405     | 0.18  | 1.156283e-52 | 14 |  |
| YIF1A        | Activated  | Chemokine |       |              |    |  |
| 6.606085e-57 | -0.7849399 | 0.282     | 0.476 | 1.177799e-52 | 14 |  |
| GPSM3        | Activated  | Chemokine |       |              |    |  |
| 6.775235e-57 | 0.435604   | 0.859     | 0.636 | 1.207957e-52 | 14 |  |
| HNRNPM       | Activated  | Chemokine |       |              |    |  |
| 9.519214e-57 | 0.5117815  | 0.408     | 0.174 | 1.697181e-52 | 14 |  |
| SDAD1        | Activated  | Chemokine |       |              |    |  |
| 1.019573e-56 | 0.5079439  | 0.59      | 0.331 | 1.817797e-52 | 14 |  |
| BUD31        | Activated  | Chemokine |       |              |    |  |
| 1.324639e-56 | 0.5461943  | 0.687     | 0.444 | 2.361699e-52 | 14 |  |
| EIF5         | Activated  | Chemokine |       |              |    |  |
| 1.686667e-56 | 0.498974   | 0.402     | 0.178 | 3.007159e-52 | 14 |  |
| LRRC59       | Activated  | Chemokine |       |              |    |  |
| 1.769187e-56 | 0.4818737  | 0.279     | 0.088 | 3.154283e-52 | 14 |  |
| DDX10        | Activated  | Chemokine |       |              |    |  |
| 2.816351e-56 | 0.5263497  | 0.461     | 0.228 | 5.021273e-52 | 14 |  |
| PHF5A        | Activated  | Chemokine |       |              |    |  |
| 6.066899e-56 | 0.5003924  | 0.356     | 0.142 | 1.081667e-51 | 14 |  |
| TIMM9        | Activated  | Chemokine |       |              |    |  |
| 6.362344e-56 | 0.4321629  | 0.83      | 0.599 | 1.134342e-51 | 14 |  |
| PSMB3        | Activated  | Chemokine |       |              |    |  |
| 6.993031e-56 | 0.4969427  | 0.696     | 0.444 | 1.246787e-51 | 14 |  |
| NDUFB9       | Activated  | Chemokine |       |              |    |  |
| 7.67489e-56  | 0.5173691  | 0.443     | 0.207 | 1.368356e-51 | 14 |  |
| PRPF19       | Activated  | Chemokine |       |              |    |  |
| 1.126136e-55 | 0.4036407  | 0.206     | 0.047 | 2.007789e-51 | 14 |  |
| TRMT61A      | Activated  | Chemokine |       |              |    |  |
| 1.521589e-55 | 0.5377807  | 0.44      | 0.208 | 2.712841e-51 | 14 |  |
| EPRS         | Activated  | Chemokine |       |              |    |  |
| 2.386984e-55 | 0.397345   | 0.186     | 0.041 | 4.255753e-51 | 14 |  |
| RCL1         | Activated  | Chemokine |       |              |    |  |
| 2.563653e-55 | 0.5172362  | 0.671     | 0.41  | 4.570737e-51 | 14 |  |
| IDI1         | Activated  | Chemokine |       |              |    |  |
| 3.087823e-55 | 0.472743   | 0.322     | 0.124 | 5.505281e-51 | 14 |  |

|              |                     |       |       |              |    |  |
|--------------|---------------------|-------|-------|--------------|----|--|
| EIF3B        | Activated Chemokine |       |       |              |    |  |
| 3.679911e-55 | 0.4531202           | 0.791 | 0.561 | 6.560914e-51 | 14 |  |
| UQCRQ        | Activated Chemokine |       |       |              |    |  |
| 5.949691e-55 | 0.5091902           | 0.378 | 0.163 | 1.06077e-50  | 14 |  |
| SAR1A        | Activated Chemokine |       |       |              |    |  |
| 6.272631e-55 | 0.4373769           | 0.249 | 0.071 | 1.118347e-50 | 14 |  |
| PNPT1        | Activated Chemokine |       |       |              |    |  |
| 8.89302e-55  | 0.5125613           | 0.492 | 0.244 | 1.585536e-50 | 14 |  |
| SUPT16H      | Activated Chemokine |       |       |              |    |  |
| 1.487298e-54 | 0.4773319           | 0.796 | 0.574 | 2.651703e-50 | 14 |  |
| LDHB         | Activated Chemokine |       |       |              |    |  |
| 2.667068e-54 | 0.5146209           | 0.665 | 0.421 | 4.755116e-50 | 14 |  |
| RNPS1        | Activated Chemokine |       |       |              |    |  |
| 3.23957e-54  | 0.5206468           | 0.504 | 0.265 | 5.77583e-50  | 14 |  |
| ARF4         | Activated Chemokine |       |       |              |    |  |
| 3.969683e-54 | 0.4933998           | 0.402 | 0.176 | 7.077547e-50 | 14 |  |
| TMEM126A     | Activated Chemokine |       |       |              |    |  |
| 4.079022e-54 | 0.6151657           | 0.588 | 0.33  | 7.272487e-50 | 14 |  |
| CD48         | Activated Chemokine |       |       |              |    |  |
| 4.210736e-54 | 0.5210368           | 0.531 | 0.289 | 7.50732e-50  | 14 |  |
| ILF3         | Activated Chemokine |       |       |              |    |  |
| 5.541159e-54 | 0.4435164           | 0.239 | 0.073 | 9.879333e-50 | 14 |  |
| ATAD3A       | Activated Chemokine |       |       |              |    |  |
| 6.960094e-54 | 0.5377671           | 0.425 | 0.19  | 1.240915e-49 | 14 |  |
| MRPL1        | Activated Chemokine |       |       |              |    |  |
| 8.092426e-54 | -0.6068838          | 0.759 | 0.857 | 1.442799e-49 | 14 |  |
| SH3BGR13     | Activated Chemokine |       |       |              |    |  |
| 8.74147e-54  | 0.513939            | 0.408 | 0.187 | 1.558517e-49 | 14 |  |
| CCDC124      | Activated Chemokine |       |       |              |    |  |
| 1.122572e-53 | 0.4539157           | 0.303 | 0.114 | 2.001433e-49 | 14 |  |
| POLR2D       | Activated Chemokine |       |       |              |    |  |
| 1.257534e-53 | 0.5277179           | 0.601 | 0.348 | 2.242058e-49 | 14 |  |
| KPNB1        | Activated Chemokine |       |       |              |    |  |
| 1.555678e-53 | 0.464479            | 0.281 | 0.088 | 2.773619e-49 | 14 |  |
| PDCD11       | Activated Chemokine |       |       |              |    |  |
| 1.938162e-53 | 0.5072875           | 0.567 | 0.318 | 3.455548e-49 | 14 |  |
| PUF60        | Activated Chemokine |       |       |              |    |  |
| 2.047921e-53 | 0.5095543           | 0.421 | 0.182 | 3.651238e-49 | 14 |  |
| YARS         | Activated Chemokine |       |       |              |    |  |
| 2.299615e-53 | 0.3768198           | 0.159 | 0.031 | 4.099984e-49 | 14 |  |
| CD3EAP       | Activated Chemokine |       |       |              |    |  |
| 2.399168e-53 | 0.4987435           | 0.438 | 0.208 | 4.277477e-49 | 14 |  |
| PSMD12       | Activated Chemokine |       |       |              |    |  |
| 2.861086e-53 | -1.225438           | 0.046 | 0.21  | 5.101031e-49 | 14 |  |
| RGS13        | Activated Chemokine |       |       |              |    |  |
| 4.603891e-53 | 0.4721592           | 0.378 | 0.152 | 8.208277e-49 | 14 |  |
| NAA15        | Activated Chemokine |       |       |              |    |  |
| 4.767286e-53 | 0.4475043           | 0.75  | 0.504 | 8.499594e-49 | 14 |  |
| PSMD8        | Activated Chemokine |       |       |              |    |  |
| 4.965034e-53 | 0.4579768           | 0.268 | 0.091 | 8.852159e-49 | 14 |  |

|              |           |           |           |            |       |       |              |    |
|--------------|-----------|-----------|-----------|------------|-------|-------|--------------|----|
| 5.493508e-53 | NOC4L     | Activated | Chemokine | 0.4943481  | 0.639 | 0.377 | 9.794376e-49 | 14 |
| 6.137802e-53 | C19orf70  | Activated | Chemokine | 0.3977596  | 0.795 | 0.548 | 1.094309e-48 | 14 |
| 2.381354e-52 | SEC61G    | Activated | Chemokine | 0.3567343  | 0.114 | 0.017 | 4.245717e-48 | 14 |
| 4.069348e-52 | LTA       | Activated | Chemokine | 0.5035575  | 0.393 | 0.178 | 7.25524e-48  | 14 |
| 4.842035e-52 | TMA16     | Activated | Chemokine | 0.4873329  | 0.316 | 0.123 | 8.632864e-48 | 14 |
| 7.598451e-52 | TOMM5     | Activated | Chemokine | 0.4727321  | 0.654 | 0.396 | 1.354728e-47 | 14 |
| 9.8889e-52   | PSMC5     | Activated | Chemokine | 0.4962444  | 0.339 | 0.124 | 1.763092e-47 | 14 |
| 1.316543e-51 | ZC3H8     | Activated | Chemokine | -0.8232783 | 0.269 | 0.458 | 2.347264e-47 | 14 |
| 2.27304e-51  | PTPRC     | Activated | Chemokine | 0.4668964  | 0.321 | 0.122 | 4.052603e-47 | 14 |
| 2.935838e-51 | GART      | Activated | Chemokine | 0.6095057  | 0.44  | 0.212 | 5.234306e-47 | 14 |
| 4.28951e-51  | HMGCS1    | Activated | Chemokine | 0.4620408  | 0.33  | 0.125 | 7.647768e-47 | 14 |
| 4.927778e-51 | TGS1      | Activated | Chemokine | -0.7136004 | 0.113 | 0.289 | 8.785735e-47 | 14 |
| 5.375862e-51 | ACAP1     | Activated | Chemokine | 0.4974473  | 0.428 | 0.204 | 9.584624e-47 | 14 |
| 7.046591e-51 | CHORDC1   | Activated | Chemokine | 0.4848307  | 0.211 | 0.058 | 1.256337e-46 | 14 |
| 8.604013e-51 | TRIB3     | Activated | Chemokine | -0.3920435 | 0.999 | 0.999 | 1.534009e-46 | 14 |
| 1.495193e-50 | RPL34     | Activated | Chemokine | 0.3785946  | 0.152 | 0.033 | 2.66578e-46  | 14 |
| 1.670638e-50 | SLC9B2    | Activated | Chemokine | 0.4771401  | 0.432 | 0.207 | 2.97858e-46  | 14 |
| 2.054435e-50 | COPS3     | Activated | Chemokine | 0.5966342  | 0.335 | 0.14  | 3.662853e-46 | 14 |
| 2.42019e-50  | SERPINB9  | Activated | Chemokine | 0.4704768  | 0.373 | 0.155 | 4.314957e-46 | 14 |
| 3.007512e-50 | MPHOSPH10 | Activated | Chemokine | 0.4244558  | 0.824 | 0.603 | 5.362093e-46 | 14 |
| 3.727762e-50 | POLR2L    | Activated | Chemokine | 0.4621577  | 0.534 | 0.294 | 6.646227e-46 | 14 |
| 3.858446e-50 | GTF2A2    | Activated | Chemokine | 0.4215946  | 0.254 | 0.076 | 6.879223e-46 | 14 |
| 4.428656e-50 | TIMM8A    | Activated | Chemokine | 0.4227933  | 0.711 | 0.472 | 7.895851e-46 | 14 |
| 6.366738e-50 | UBE2N     | Activated | Chemokine | 0.4969016  | 0.377 | 0.163 | 1.135126e-45 | 14 |
| 8.223438e-50 | MARS      | Activated | Chemokine | 0.4700695  | 0.628 | 0.376 | 1.466157e-45 | 14 |

|              |            |                     |            |       |       |              |    |
|--------------|------------|---------------------|------------|-------|-------|--------------|----|
| 9.318606e-50 | SRSF10     | Activated Chemokine | -0.6302791 | 0.051 | 0.212 | 1.661414e-45 | 14 |
| 1.085961e-49 | GLRX       | Activated Chemokine | 0.4442157  | 0.483 | 0.237 | 1.93616e-45  | 14 |
| 1.380036e-49 | KPNA2      | Activated Chemokine | 0.3470985  | 0.152 | 0.036 | 2.460466e-45 | 14 |
| 1.633828e-49 | SLC16A1    | Activated Chemokine | -0.8245149 | 0.239 | 0.424 | 2.912953e-45 | 14 |
| 1.765913e-49 | AC114760.2 | Activated Chemokine | 0.3837587  | 0.171 | 0.04  | 3.148446e-45 | 14 |
| 1.777069e-49 | MAK16      | Activated Chemokine | 0.4477797  | 0.269 | 0.09  | 3.168337e-45 | 14 |
| 1.961272e-49 | NOP14      | Activated Chemokine | -0.8295614 | 0.181 | 0.351 | 3.496751e-45 | 14 |
| 1.974026e-49 | TRAF3IP3   | Activated Chemokine | 0.4104325  | 0.225 | 0.074 | 3.519491e-45 | 14 |
| 2.13283e-49  | BTG3       | Activated Chemokine | 0.4756738  | 0.21  | 0.071 | 3.802623e-45 | 14 |
| 3.22146e-49  | KLF10      | Activated Chemokine | -0.6790235 | 0.089 | 0.258 | 5.743542e-45 | 14 |
| 3.408262e-49 | TBC1D10C   | Activated Chemokine | -1.262307  | 0.119 | 0.267 | 6.076591e-45 | 14 |
| 4.21566e-49  | S100A4     | Activated Chemokine | 0.5050158  | 0.439 | 0.207 | 7.5161e-45   | 14 |
| 6.922828e-49 | COX20      | Activated Chemokine | 0.4893049  | 0.456 | 0.232 | 1.234271e-44 | 14 |
| 8.967039e-49 | STIP1      | Activated Chemokine | 0.3983529  | 0.228 | 0.071 | 1.598733e-44 | 14 |
| 1.001099e-48 | PPIL1      | Activated Chemokine | 0.4561294  | 0.651 | 0.401 | 1.78486e-44  | 14 |
| 1.306414e-48 | BANF1      | Activated Chemokine | 0.3287691  | 0.136 | 0.025 | 2.329206e-44 | 14 |
| 1.91762e-48  | UCK2       | Activated Chemokine | 0.3413204  | 0.599 | 0.305 | 3.418925e-44 | 14 |
| 2.063792e-48 | HSP90B1    | Activated Chemokine | 0.3764099  | 0.217 | 0.058 | 3.679535e-44 | 14 |
| 2.112957e-48 | SLC25A32   | Activated Chemokine | 0.5006008  | 0.355 | 0.153 | 3.767191e-44 | 14 |
| 2.442613e-48 | TRMT1      | Activated Chemokine | 0.3914613  | 0.836 | 0.623 | 4.354935e-44 | 14 |
| 2.451885e-48 | ATP5F1B    | Activated Chemokine | 0.4653056  | 0.281 | 0.103 | 4.371466e-44 | 14 |
| 2.878454e-48 | MAT2A      | Activated Chemokine | 0.4611799  | 0.548 | 0.298 | 5.131996e-44 | 14 |
| 3.101929e-48 | KARS       | Activated Chemokine | 0.4171576  | 0.237 | 0.073 | 5.530429e-44 | 14 |
| 3.613508e-48 | ALKBH2     | Activated Chemokine | 0.45692    | 0.721 | 0.491 | 6.442523e-44 | 14 |
| 3.907395e-48 | EIF4G2     | Activated Chemokine | -0.7233121 | 0.092 | 0.263 | 6.966495e-44 | 14 |



|              |          |                     |            |       |       |              |    |
|--------------|----------|---------------------|------------|-------|-------|--------------|----|
| 4.323941e-48 | SYNE2    | Activated Chemokine | -0.5814503 | 0.886 | 0.936 | 7.709154e-44 | 14 |
| 4.369481e-48 | BTG1     | Activated Chemokine | -0.8377394 | 0.228 | 0.41  | 7.790348e-44 | 14 |
| 4.966883e-48 | SMIM14   | Activated Chemokine | 0.4231159  | 0.25  | 0.082 | 8.855456e-44 | 14 |
| 8.874018e-48 | UTP14A   | Activated Chemokine | -0.8117249 | 0.116 | 0.271 | 1.582149e-43 | 14 |
| 9.302779e-48 | HHEX     | Activated Chemokine | 0.4259182  | 0.711 | 0.476 | 1.658593e-43 | 14 |
| 1.011165e-47 | TRA2B    | Activated Chemokine | -0.7604615 | 0.228 | 0.393 | 1.802807e-43 | 14 |
| 1.021102e-47 | ARL6IP5  | Activated Chemokine | 0.3403449  | 0.165 | 0.036 | 1.820523e-43 | 14 |
| 1.040042e-47 | ATAD3B   | Activated Chemokine | -0.766252  | 0.332 | 0.498 | 1.85429e-43  | 14 |
| 1.076876e-47 | SP100    | Activated Chemokine | 0.4743452  | 0.449 | 0.222 | 1.919962e-43 | 14 |
| 1.195493e-47 | FUBP1    | Activated Chemokine | 0.4345994  | 0.315 | 0.129 | 2.131444e-43 | 14 |
| 1.726943e-47 | EIF4G1   | Activated Chemokine | 0.4598581  | 0.623 | 0.368 | 3.078967e-43 | 14 |
| 1.926146e-47 | LCP1     | Activated Chemokine | 0.3253659  | 0.162 | 0.035 | 3.434126e-43 | 14 |
| 1.937767e-47 | TTL12    | Activated Chemokine | 0.4579384  | 0.531 | 0.296 | 3.454845e-43 | 14 |
| 2.058367e-47 | AHSA1    | Activated Chemokine | 0.4494058  | 0.303 | 0.116 | 3.669862e-43 | 14 |
| 2.320284e-47 | TRAP1    | Activated Chemokine | -0.7243894 | 0.451 | 0.63  | 4.136835e-43 | 14 |
| 3.419343e-47 | HLA-DMB  | Activated Chemokine | 0.4636001  | 0.383 | 0.184 | 6.096346e-43 | 14 |
| 8.457735e-47 | RUVBL2   | Activated Chemokine | 0.4222459  | 0.583 | 0.326 | 1.50793e-42  | 14 |
| 8.576724e-47 | LSM2     | Activated Chemokine | 0.4790678  | 0.466 | 0.242 | 1.529144e-42 | 14 |
| 1.000959e-46 | RPL7L1   | Activated Chemokine | 0.4684043  | 0.381 | 0.176 | 1.784609e-42 | 14 |
| 1.054191e-46 | RNF126   | Activated Chemokine | 0.456323   | 0.328 | 0.141 | 1.879517e-42 | 14 |
| 1.095902e-46 | ADSL     | Activated Chemokine | -0.797036  | 0.128 | 0.282 | 1.953884e-42 | 14 |
| 1.241359e-46 | ADAM28   | Activated Chemokine | -0.7641302 | 0.282 | 0.452 | 2.213218e-42 | 14 |
| 1.420874e-46 | PNRC1    | Activated Chemokine | 0.4154538  | 0.763 | 0.527 | 2.533277e-42 | 14 |
| 1.538208e-46 | RBMX     | Activated Chemokine | -0.7165003 | 0.061 | 0.21  | 2.74247e-42  | 14 |
| 2.022506e-46 | C16orf74 | Activated Chemokine | 0.4456937  | 0.679 | 0.444 | 3.605926e-42 | 14 |

|              |          |                     |            |       |       |              |    |
|--------------|----------|---------------------|------------|-------|-------|--------------|----|
| 2.111366e-46 | SF3B5    | Activated Chemokine | -0.729726  | 0.694 | 0.766 | 3.764354e-42 | 14 |
| 2.119266e-46 | MYL12A   | Activated Chemokine | -0.7240109 | 0.123 | 0.288 | 3.778438e-42 | 14 |
| 2.637611e-46 | GNG7     | Activated Chemokine | 0.4283718  | 0.705 | 0.479 | 4.702597e-42 | 14 |
| 2.902335e-46 | GTF3A    | Activated Chemokine | 0.4238145  | 0.255 | 0.096 | 5.174574e-42 | 14 |
| 3.035775e-46 | FAM241A  | Activated Chemokine | -0.3824851 | 0.997 | 0.997 | 5.412482e-42 | 14 |
| 3.378642e-46 | RPS15A   | Activated Chemokine | 0.3917748  | 0.224 | 0.067 | 6.023781e-42 | 14 |
| 4.872158e-46 | NOL10    | Activated Chemokine | 0.4171466  | 0.263 | 0.092 | 8.686571e-42 | 14 |
| 5.603027e-46 | TBL3     | Activated Chemokine | -0.5679466 | 0.721 | 0.817 | 9.989637e-42 | 14 |
| 6.442832e-46 | HLA-DPA1 | Activated Chemokine | 0.4354673  | 0.317 | 0.128 | 1.148693e-41 | 14 |
| 6.478008e-46 | IDH3A    | Activated Chemokine | 0.4502431  | 0.471 | 0.235 | 1.154964e-41 | 14 |
| 8.048641e-46 | CCDC59   | Activated Chemokine | 0.5017585  | 0.618 | 0.385 | 1.434992e-41 | 14 |
| 1.000512e-45 | ARPC5L   | Activated Chemokine | 0.4375436  | 0.344 | 0.152 | 1.783813e-41 | 14 |
| 1.015364e-45 | DNAJB11  | Activated Chemokine | -0.8740324 | 0.152 | 0.306 | 1.810293e-41 | 14 |
| 1.250228e-45 | ZFP36L2  | Activated Chemokine | 0.4527749  | 0.381 | 0.167 | 2.229031e-41 | 14 |
| 1.315387e-45 | SBDS     | Activated Chemokine | 0.4523781  | 0.387 | 0.184 | 2.345204e-41 | 14 |
| 1.89017e-45  | TSTA3    | Activated Chemokine | 0.4207632  | 0.465 | 0.244 | 3.369985e-41 | 14 |
| 2.202043e-45 | MRPL13   | Activated Chemokine | 0.4479633  | 0.362 | 0.157 | 3.926022e-41 | 14 |
| 2.63647e-45  | PPP1R14B | Activated Chemokine | 0.3598431  | 0.802 | 0.571 | 4.700563e-41 | 14 |
| 3.008223e-45 | TUBB     | Activated Chemokine | 0.3996905  | 0.206 | 0.052 | 5.36336e-41  | 14 |
| 3.022349e-45 | GNPDA1   | Activated Chemokine | 0.4296039  | 0.632 | 0.394 | 5.388546e-41 | 14 |
| 3.030742e-45 | ENY2     | Activated Chemokine | 0.4424885  | 0.342 | 0.157 | 5.40351e-41  | 14 |
| 3.036883e-45 | EI24     | Activated Chemokine | 0.4349168  | 0.578 | 0.338 | 5.414458e-41 | 14 |
| 3.143965e-45 | MRPS18C  | Activated Chemokine | 0.442005   | 0.489 | 0.262 | 5.605376e-41 | 14 |
| 3.400114e-45 | PSMD3    | Activated Chemokine | 0.4805653  | 0.72  | 0.504 | 6.062063e-41 | 14 |
| 3.615157e-45 | TALD01   | Activated Chemokine | 0.4564731  | 0.362 | 0.162 | 6.445463e-41 | 14 |

|              |           |                     |            |       |       |              |    |
|--------------|-----------|---------------------|------------|-------|-------|--------------|----|
| 4.054335e-45 | PARL      | Activated Chemokine | 0.4732606  | 0.426 | 0.218 | 7.228474e-41 | 14 |
| 5.248325e-45 | HSPH1     | Activated Chemokine | 0.3476536  | 0.806 | 0.579 | 9.357238e-41 | 14 |
| 7.386753e-45 | ATP5MC3   | Activated Chemokine | -0.7462075 | 0.682 | 0.764 | 1.316984e-40 | 14 |
| 7.493383e-45 | CYBA      | Activated Chemokine | -0.6056034 | 0.03  | 0.164 | 1.335995e-40 | 14 |
| 9.116775e-45 | SUSD3     | Activated Chemokine | 0.4293791  | 0.666 | 0.435 | 1.62543e-40  | 14 |
| 1.673449e-44 | AURKAIP1  | Activated Chemokine | 0.4391873  | 0.67  | 0.44  | 2.983592e-40 | 14 |
| 2.478959e-44 | PGAM1     | Activated Chemokine | 0.4155701  | 0.268 | 0.091 | 4.419737e-40 | 14 |
| 3.178253e-44 | SURF6     | Activated Chemokine | 0.4460295  | 0.528 | 0.296 | 5.666507e-40 | 14 |
| 4.102617e-44 | POLR2I    | Activated Chemokine | 0.446482   | 0.439 | 0.219 | 7.314556e-40 | 14 |
| 4.109769e-44 | RHEB      | Activated Chemokine | 0.3010789  | 0.15  | 0.029 | 7.327307e-40 | 14 |
| 4.191967e-44 | RRP12     | Activated Chemokine | 0.4460426  | 0.383 | 0.18  | 7.473859e-40 | 14 |
| 5.367497e-44 | USP14     | Activated Chemokine | 0.4926451  | 0.46  | 0.243 | 9.56971e-40  | 14 |
| 8.860175e-44 | EXOSC8    | Activated Chemokine | 0.4345166  | 0.334 | 0.137 | 1.579681e-39 | 14 |
| 9.670887e-44 | ARMC10    | Activated Chemokine | 0.4825106  | 0.238 | 0.082 | 1.724222e-39 | 14 |
| 1.100692e-43 | LINC01480 | Activated Chemokine | 0.4610695  | 0.559 | 0.326 | 1.962423e-39 | 14 |
| 1.757874e-43 | PDAP1     | Activated Chemokine | 0.4399472  | 0.61  | 0.38  | 3.134113e-39 | 14 |
| 1.823504e-43 | SNRPC     | Activated Chemokine | -0.7335971 | 0.139 | 0.293 | 3.251125e-39 | 14 |
| 1.835166e-43 | DCK       | Activated Chemokine | 0.3888478  | 0.268 | 0.093 | 3.271918e-39 | 14 |
| 2.266837e-43 | GFM1      | Activated Chemokine | 0.3399632  | 0.859 | 0.652 | 4.041544e-39 | 14 |
| 2.507909e-43 | SLC25A5   | Activated Chemokine | 0.350972   | 0.83  | 0.612 | 4.471351e-39 | 14 |
| 2.933336e-43 | NDUFA13   | Activated Chemokine | 0.4069596  | 0.28  | 0.107 | 5.229845e-39 | 14 |
| 4.287874e-43 | PRMT5     | Activated Chemokine | 0.4698721  | 0.499 | 0.282 | 7.644851e-39 | 14 |
| 5.364736e-43 | PFDN6     | Activated Chemokine | 0.4700129  | 0.43  | 0.226 | 9.564787e-39 | 14 |
| 6.256885e-43 | UFM1      | Activated Chemokine | 0.4334749  | 0.338 | 0.148 | 1.11554e-38  | 14 |
| 8.23626e-43  | DDX56     | Activated Chemokine | 0.4545903  | 0.372 | 0.165 | 1.468443e-38 | 14 |

|              |            |           |       |              |    |  |
|--------------|------------|-----------|-------|--------------|----|--|
| RABGGTB      | Activated  | Chemokine |       |              |    |  |
| 9.617252e-43 | 0.4296329  | 0.359     | 0.149 | 1.71466e-38  | 14 |  |
| CFAP97       | Activated  | Chemokine |       |              |    |  |
| 1.343956e-42 | 0.4021938  | 0.312     | 0.13  | 2.396138e-38 | 14 |  |
| EXOSC7       | Activated  | Chemokine |       |              |    |  |
| 1.38689e-42  | -0.7099141 | 0.091     | 0.241 | 2.472687e-38 | 14 |  |
| GCHFR        | Activated  | Chemokine |       |              |    |  |
| 1.548027e-42 | 0.3423122  | 0.836     | 0.636 | 2.759976e-38 | 14 |  |
| ATP5MF       | Activated  | Chemokine |       |              |    |  |
| 1.660114e-42 | 0.4488098  | 0.49      | 0.268 | 2.959818e-38 | 14 |  |
| NAA10        | Activated  | Chemokine |       |              |    |  |
| 2.140177e-42 | 0.4218176  | 0.322     | 0.139 | 3.815722e-38 | 14 |  |
| MPHOSPH6     | Activated  | Chemokine |       |              |    |  |
| 2.298914e-42 | -0.7351049 | 0.308     | 0.471 | 4.098734e-38 | 14 |  |
| ITM2B        | Activated  | Chemokine |       |              |    |  |
| 4.007919e-42 | 0.4144043  | 0.38      | 0.177 | 7.145719e-38 | 14 |  |
| DHX15        | Activated  | Chemokine |       |              |    |  |
| 4.994545e-42 | 0.3030922  | 0.137     | 0.027 | 8.904774e-38 | 14 |  |
| TWINK        | Activated  | Chemokine |       |              |    |  |
| 5.004425e-42 | 0.3760221  | 0.12      | 0.024 | 8.922388e-38 | 14 |  |
| EGR1         | Activated  | Chemokine |       |              |    |  |
| 5.106851e-42 | 0.3791074  | 0.228     | 0.075 | 9.105006e-38 | 14 |  |
| FASTKD2      | Activated  | Chemokine |       |              |    |  |
| 5.978175e-42 | 0.3865242  | 0.185     | 0.055 | 1.065849e-37 | 14 |  |
| BCAT1        | Activated  | Chemokine |       |              |    |  |
| 6.006387e-42 | 0.3217383  | 0.917     | 0.773 | 1.070879e-37 | 14 |  |
| NAP1L1       | Activated  | Chemokine |       |              |    |  |
| 6.081985e-42 | -0.6456267 | 0.112     | 0.262 | 1.084357e-37 | 14 |  |
| CNN2         | Activated  | Chemokine |       |              |    |  |
| 6.572462e-42 | 0.4450618  | 0.495     | 0.273 | 1.171804e-37 | 14 |  |
| PHPT1        | Activated  | Chemokine |       |              |    |  |
| 6.941681e-42 | 0.4072423  | 0.76      | 0.527 | 1.237632e-37 | 14 |  |
| IMPDH2       | Activated  | Chemokine |       |              |    |  |
| 8.07896e-42  | -0.6898534 | 0.053     | 0.177 | 1.440398e-37 | 14 |  |
| MARCH1       | Activated  | Chemokine |       |              |    |  |
| 8.092663e-42 | 0.4289627  | 0.484     | 0.246 | 1.442841e-37 | 14 |  |
| NFE2L2       | Activated  | Chemokine |       |              |    |  |
| 9.688014e-42 | 0.4432662  | 0.529     | 0.302 | 1.727276e-37 | 14 |  |
| HAX1         | Activated  | Chemokine |       |              |    |  |
| 1.025923e-41 | 0.4396674  | 0.304     | 0.127 | 1.829118e-37 | 14 |  |
| GOT1         | Activated  | Chemokine |       |              |    |  |
| 1.200058e-41 | 0.4252541  | 0.28      | 0.112 | 2.139584e-37 | 14 |  |
| TXNRD1       | Activated  | Chemokine |       |              |    |  |
| 1.403415e-41 | 0.4136818  | 0.307     | 0.127 | 2.502149e-37 | 14 |  |
| CCDC47       | Activated  | Chemokine |       |              |    |  |
| 1.783043e-41 | 0.3902368  | 0.172     | 0.06  | 3.178987e-37 | 14 |  |
| NINJ1        | Activated  | Chemokine |       |              |    |  |
| 2.189485e-41 | 0.3399873  | 0.152     | 0.036 | 3.903633e-37 | 14 |  |
| DUSP5        | Activated  | Chemokine |       |              |    |  |
| 2.56536e-41  | -0.7118089 | 0.137     | 0.302 | 4.57378e-37  | 14 |  |

|              |            |           |       |              |    |  |
|--------------|------------|-----------|-------|--------------|----|--|
| TCF4         | Activated  | Chemokine |       |              |    |  |
| 3.072109e-41 | 0.4279873  | 0.47      | 0.248 | 5.477263e-37 | 14 |  |
| DDX27        | Activated  | Chemokine |       |              |    |  |
| 3.092601e-41 | 0.4049185  | 0.459     | 0.235 | 5.513799e-37 | 14 |  |
| MYDGF        | Activated  | Chemokine |       |              |    |  |
| 3.503155e-41 | 0.3150925  | 0.143     | 0.034 | 6.245775e-37 | 14 |  |
| PPAT         | Activated  | Chemokine |       |              |    |  |
| 3.623309e-41 | 0.3726613  | 0.733     | 0.501 | 6.459997e-37 | 14 |  |
| SRRM1        | Activated  | Chemokine |       |              |    |  |
| 3.650001e-41 | 0.3802884  | 0.262     | 0.1   | 6.507587e-37 | 14 |  |
| MRPL17       | Activated  | Chemokine |       |              |    |  |
| 4.038517e-41 | 0.4747775  | 0.632     | 0.377 | 7.200272e-37 | 14 |  |
| CD44         | Activated  | Chemokine |       |              |    |  |
| 4.383467e-41 | 0.3669135  | 0.234     | 0.075 | 7.815283e-37 | 14 |  |
| NAT10        | Activated  | Chemokine |       |              |    |  |
| 4.732902e-41 | 0.4262054  | 0.484     | 0.258 | 8.438292e-37 | 14 |  |
| MRPL11       | Activated  | Chemokine |       |              |    |  |
| 5.199027e-41 | -0.422351  | 0.008     | 0.114 | 9.269345e-37 | 14 |  |
| CPNE5        | Activated  | Chemokine |       |              |    |  |
| 5.519239e-41 | 0.3222478  | 0.885     | 0.696 | 9.840251e-37 | 14 |  |
| ELOB         | Activated  | Chemokine |       |              |    |  |
| 6.867643e-41 | 0.4042061  | 0.301     | 0.121 | 1.224432e-36 | 14 |  |
| ALG13        | Activated  | Chemokine |       |              |    |  |
| 8.568017e-41 | 0.4988212  | 0.412     | 0.206 | 1.527592e-36 | 14 |  |
| C19orf48     | Activated  | Chemokine |       |              |    |  |
| 9.511537e-41 | 0.3768611  | 0.217     | 0.067 | 1.695812e-36 | 14 |  |
| FAM210A      | Activated  | Chemokine |       |              |    |  |
| 1.024347e-40 | 0.4362244  | 0.727     | 0.529 | 1.826309e-36 | 14 |  |
| SOD1         | Activated  | Chemokine |       |              |    |  |
| 1.156119e-40 | 0.3623997  | 0.204     | 0.062 | 2.061245e-36 | 14 |  |
| PINX1.1      | Activated  | Chemokine |       |              |    |  |
| 1.192183e-40 | 0.3082996  | 0.922     | 0.803 | 2.125544e-36 | 14 |  |
| CALM2        | Activated  | Chemokine |       |              |    |  |
| 1.207582e-40 | 0.3711151  | 0.676     | 0.443 | 2.152998e-36 | 14 |  |
| SEM1         | Activated  | Chemokine |       |              |    |  |
| 1.216475e-40 | 0.4454783  | 0.46      | 0.241 | 2.168852e-36 | 14 |  |
| PABPC4       | Activated  | Chemokine |       |              |    |  |
| 1.279025e-40 | 0.3584435  | 0.833     | 0.639 | 2.280374e-36 | 14 |  |
| TRMT112      | Activated  | Chemokine |       |              |    |  |
| 1.735404e-40 | 0.4253035  | 0.445     | 0.235 | 3.094051e-36 | 14 |  |
| SRSF1        | Activated  | Chemokine |       |              |    |  |
| 1.793497e-40 | 0.3475179  | 0.182     | 0.053 | 3.197625e-36 | 14 |  |
| RABEPK       | Activated  | Chemokine |       |              |    |  |
| 2.039872e-40 | -0.6254651 | 0.079     | 0.218 | 3.636888e-36 | 14 |  |
| YPEL3        | Activated  | Chemokine |       |              |    |  |
| 2.084713e-40 | 0.4417159  | 0.402     | 0.208 | 3.716835e-36 | 14 |  |
| SLC25A39     | Activated  | Chemokine |       |              |    |  |
| 2.137717e-40 | 0.3101645  | 0.161     | 0.043 | 3.811335e-36 | 14 |  |
| PELO         | Activated  | Chemokine |       |              |    |  |
| 2.632597e-40 | 0.4854142  | 0.4       | 0.196 | 4.693657e-36 | 14 |  |

|              |         |           |           |            |       |       |              |    |
|--------------|---------|-----------|-----------|------------|-------|-------|--------------|----|
| 2.703577e-40 | SRSF6   | Activated | Chemokine | 0.4107855  | 0.482 | 0.267 | 4.820207e-36 | 14 |
| 2.938122e-40 | POLR2F  | Activated | Chemokine | 0.4372305  | 0.709 | 0.472 | 5.238378e-36 | 14 |
| 3.654368e-40 | SQSTM1  | Activated | Chemokine | 0.4377081  | 0.442 | 0.234 | 6.515372e-36 | 14 |
| 3.947733e-40 | MRPL15  | Activated | Chemokine | 0.4280966  | 0.3   | 0.126 | 7.038413e-36 | 14 |
| 4.159465e-40 | UBE2G2  | Activated | Chemokine | 0.4106277  | 0.428 | 0.215 | 7.415911e-36 | 14 |
| 5.393293e-40 | SF3A3   | Activated | Chemokine | 0.4407065  | 0.25  | 0.094 | 9.615702e-36 | 14 |
| 6.258724e-40 | PLGRKT  | Activated | Chemokine | -0.7514271 | 0.251 | 0.401 | 1.115868e-35 | 14 |
| 6.769408e-40 | ORAI2   | Activated | Chemokine | 0.460644   | 0.552 | 0.322 | 1.206918e-35 | 14 |
| 8.90491e-40  | PTPN6   | Activated | Chemokine | 0.4439745  | 0.37  | 0.181 | 1.587656e-35 | 14 |
| 9.413626e-40 | MFNG    | Activated | Chemokine | 0.3113683  | 0.872 | 0.673 | 1.678355e-35 | 14 |
| 1.094275e-39 | HNRNPA3 | Activated | Chemokine | 0.3762487  | 0.249 | 0.095 | 1.950982e-35 | 14 |
| 1.159475e-39 | DDX49   | Activated | Chemokine | -0.7360254 | 0.154 | 0.292 | 2.067228e-35 | 14 |
| 1.390805e-39 | BCAS4   | Activated | Chemokine | 0.4163238  | 0.386 | 0.189 | 2.479666e-35 | 14 |
| 1.469114e-39 | MRPL32  | Activated | Chemokine | 0.3928558  | 0.619 | 0.396 | 2.619283e-35 | 14 |
| 1.562032e-39 | UQCERS1 | Activated | Chemokine | -0.4863727 | 0.027 | 0.143 | 2.784947e-35 | 14 |
| 2.033859e-39 | AIM2    | Activated | Chemokine | -0.3836578 | 0.999 | 0.998 | 3.626168e-35 | 14 |
| 2.470559e-39 | B2M     | Activated | Chemokine | 0.4105825  | 0.472 | 0.249 | 4.404759e-35 | 14 |
| 2.770769e-39 | M6PR    | Activated | Chemokine | 0.4512129  | 0.439 | 0.248 | 4.940004e-35 | 14 |
| 3.208587e-39 | RGS10   | Activated | Chemokine | 0.3670196  | 0.236 | 0.084 | 5.720589e-35 | 14 |
| 3.731806e-39 | RIOK2   | Activated | Chemokine | 0.4038055  | 0.306 | 0.137 | 6.653437e-35 | 14 |
| 3.752533e-39 | CISD1   | Activated | Chemokine | 0.3660449  | 0.774 | 0.573 | 6.690391e-35 | 14 |
| 3.940202e-39 | RBM39   | Activated | Chemokine | 0.4022982  | 0.32  | 0.141 | 7.024985e-35 | 14 |
| 4.259997e-39 | TYW3    | Activated | Chemokine | 0.4350746  | 0.418 | 0.212 | 7.595148e-35 | 14 |
| 4.469636e-39 | HPRT1   | Activated | Chemokine | 0.3730407  | 0.195 | 0.068 | 7.968914e-35 | 14 |
| 5.092702e-39 | PPIF    | Activated | Chemokine | 0.3995914  | 0.356 | 0.159 | 9.079779e-35 | 14 |

|              |                     |       |       |              |    |  |
|--------------|---------------------|-------|-------|--------------|----|--|
| NOL11        | Activated Chemokine |       |       |              |    |  |
| 1.459803e-38 | 0.3211804           | 0.179 | 0.05  | 2.602682e-34 | 14 |  |
| PMM2         | Activated Chemokine |       |       |              |    |  |
| 1.591784e-38 | 0.373386            | 0.594 | 0.361 | 2.837992e-34 | 14 |  |
| PSMA5        | Activated Chemokine |       |       |              |    |  |
| 1.819491e-38 | 0.3923696           | 0.457 | 0.242 | 3.24397e-34  | 14 |  |
| SNRPA1       | Activated Chemokine |       |       |              |    |  |
| 1.847413e-38 | 0.4157332           | 0.504 | 0.292 | 3.293753e-34 | 14 |  |
| C1orf43      | Activated Chemokine |       |       |              |    |  |
| 1.935223e-38 | 0.3682115           | 0.236 | 0.092 | 3.450309e-34 | 14 |  |
| PSMG1        | Activated Chemokine |       |       |              |    |  |
| 1.946215e-38 | 0.410702            | 0.724 | 0.496 | 3.469907e-34 | 14 |  |
| FOXP1        | Activated Chemokine |       |       |              |    |  |
| 2.039168e-38 | -0.6584704          | 0.216 | 0.37  | 3.635632e-34 | 14 |  |
| CXXC5        | Activated Chemokine |       |       |              |    |  |
| 2.50941e-38  | -0.9537328          | 0.227 | 0.375 | 4.474026e-34 | 14 |  |
| SELL         | Activated Chemokine |       |       |              |    |  |
| 3.065846e-38 | -0.6863903          | 0.152 | 0.297 | 5.466097e-34 | 14 |  |
| BCL11A       | Activated Chemokine |       |       |              |    |  |
| 3.568749e-38 | 0.4014721           | 0.367 | 0.168 | 6.362723e-34 | 14 |  |
| GTPBP6       | Activated Chemokine |       |       |              |    |  |
| 3.884623e-38 | 0.3861412           | 0.646 | 0.41  | 6.925894e-34 | 14 |  |
| PRRC2C       | Activated Chemokine |       |       |              |    |  |
| 3.92513e-38  | 0.3946288           | 0.497 | 0.285 | 6.998115e-34 | 14 |  |
| CDC123       | Activated Chemokine |       |       |              |    |  |
| 4.353423e-38 | -0.6944458          | 0.155 | 0.301 | 7.761718e-34 | 14 |  |
| GGA2         | Activated Chemokine |       |       |              |    |  |
| 5.025562e-38 | 0.5007105           | 0.634 | 0.424 | 8.960074e-34 | 14 |  |
| IRF8         | Activated Chemokine |       |       |              |    |  |
| 5.066812e-38 | 0.4080426           | 0.417 | 0.216 | 9.03362e-34  | 14 |  |
| MRPL50       | Activated Chemokine |       |       |              |    |  |
| 5.691839e-38 | 0.3499074           | 0.18  | 0.053 | 1.014798e-33 | 14 |  |
| WDR36        | Activated Chemokine |       |       |              |    |  |
| 7.81772e-38  | 0.3823027           | 0.522 | 0.302 | 1.393821e-33 | 14 |  |
| CWC15        | Activated Chemokine |       |       |              |    |  |
| 8.811235e-38 | 0.3221347           | 0.15  | 0.041 | 1.570955e-33 | 14 |  |
| IRF4         | Activated Chemokine |       |       |              |    |  |
| 8.890746e-38 | 0.3926874           | 0.664 | 0.437 | 1.585131e-33 | 14 |  |
| CD164        | Activated Chemokine |       |       |              |    |  |
| 1.027152e-37 | 0.3293076           | 0.174 | 0.05  | 1.831309e-33 | 14 |  |
| EEF2KMT      | Activated Chemokine |       |       |              |    |  |
| 1.059715e-37 | 0.4056292           | 0.414 | 0.215 | 1.889367e-33 | 14 |  |
| NUTF2        | Activated Chemokine |       |       |              |    |  |
| 1.101219e-37 | 0.4477907           | 0.217 | 0.074 | 1.963363e-33 | 14 |  |
| SLAMF7       | Activated Chemokine |       |       |              |    |  |
| 1.583655e-37 | 0.3943396           | 0.503 | 0.301 | 2.823499e-33 | 14 |  |
| TIMM8B       | Activated Chemokine |       |       |              |    |  |
| 1.665139e-37 | 0.399575            | 0.639 | 0.42  | 2.968777e-33 | 14 |  |
| CD40         | Activated Chemokine |       |       |              |    |  |
| 1.721711e-37 | 0.3960624           | 0.424 | 0.22  | 3.069638e-33 | 14 |  |

|              |          |                     |            |       |       |              |    |
|--------------|----------|---------------------|------------|-------|-------|--------------|----|
| 1.794289e-37 | C19orf24 | Activated Chemokine | 0.4056323  | 0.374 | 0.184 | 3.199037e-33 | 14 |
| 2.078781e-37 | METTL5   | Activated Chemokine | -0.6904276 | 0.585 | 0.672 | 3.706258e-33 | 14 |
| 2.1408e-37   | SNX3     | Activated Chemokine | 0.3910167  | 0.276 | 0.093 | 3.816832e-33 | 14 |
| 2.168256e-37 | PARVB    | Activated Chemokine | -0.4500935 | 0.017 | 0.122 | 3.865784e-33 | 14 |
| 2.269582e-37 | PYCARD   | Activated Chemokine | -0.6355603 | 0.07  | 0.194 | 4.046437e-33 | 14 |
| 2.321522e-37 | S1PR4    | Activated Chemokine | 0.3489263  | 0.216 | 0.081 | 4.139042e-33 | 14 |
| 2.834641e-37 | TIMM23   | Activated Chemokine | 0.3503131  | 0.219 | 0.079 | 5.053882e-33 | 14 |
| 2.848354e-37 | ARMC6    | Activated Chemokine | 0.4133764  | 0.321 | 0.148 | 5.07833e-33  | 14 |
| 3.682734e-37 | BCCIP    | Activated Chemokine | 0.418441   | 0.292 | 0.125 | 6.565947e-33 | 14 |
| 3.857471e-37 | CEBPG    | Activated Chemokine | 0.4079286  | 0.572 | 0.354 | 6.877484e-33 | 14 |
| 4.80511e-37  | BSG      | Activated Chemokine | 0.4110664  | 0.472 | 0.268 | 8.567031e-33 | 14 |
| 5.251534e-37 | OLA1     | Activated Chemokine | 0.3553035  | 0.736 | 0.511 | 9.362959e-33 | 14 |
| 5.372853e-37 | EIF3G    | Activated Chemokine | 0.376213   | 0.27  | 0.11  | 9.579259e-33 | 14 |
| 5.791565e-37 | DPH3     | Activated Chemokine | -0.5593101 | 0.055 | 0.19  | 1.032578e-32 | 14 |
| 6.401766e-37 | HLA-D0B  | Activated Chemokine | 0.3770726  | 0.616 | 0.397 | 1.141371e-32 | 14 |
| 6.988286e-37 | MDH2     | Activated Chemokine | 0.429555   | 0.35  | 0.169 | 1.245941e-32 | 14 |
| 8.060938e-37 | PRELID3B | Activated Chemokine | 0.3605182  | 0.221 | 0.086 | 1.437185e-32 | 14 |
| 9.75829e-37  | MTFP1    | Activated Chemokine | -0.6092998 | 0.094 | 0.233 | 1.739806e-32 | 14 |
| 1.269503e-36 | ATM      | Activated Chemokine | 0.405624   | 0.536 | 0.327 | 2.263397e-32 | 14 |
| 1.370664e-36 | PSMC6    | Activated Chemokine | 0.3530952  | 0.246 | 0.094 | 2.443758e-32 | 14 |
| 1.417735e-36 | UMPS     | Activated Chemokine | 0.3883581  | 0.445 | 0.232 | 2.52768e-32  | 14 |
| 1.433121e-36 | NELFE    | Activated Chemokine | 0.3425619  | 0.763 | 0.551 | 2.555112e-32 | 14 |
| 1.718127e-36 | PGK1     | Activated Chemokine | 0.4748471  | 0.448 | 0.246 | 3.063249e-32 | 14 |
| 1.726419e-36 | SDCBP    | Activated Chemokine | 0.3822515  | 0.312 | 0.141 | 3.078033e-32 | 14 |
| 1.855651e-36 | MRPL39   | Activated Chemokine | -0.5725972 | 0.025 | 0.137 | 3.30844e-32  | 14 |



|              |         |                     |            |       |       |              |    |
|--------------|---------|---------------------|------------|-------|-------|--------------|----|
| 2.208278e-36 | NEIL1   | Activated Chemokine | 0.4078951  | 0.406 | 0.21  | 3.937138e-32 | 14 |
| 2.490291e-36 | TMEM70  | Activated Chemokine | 0.3848012  | 0.427 | 0.217 | 4.439939e-32 | 14 |
| 2.525198e-36 | RNMT    | Activated Chemokine | 0.3807887  | 0.275 | 0.114 | 4.502176e-32 | 14 |
| 3.357734e-36 | TMX2    | Activated Chemokine | 0.3364977  | 0.194 | 0.061 | 5.986505e-32 | 14 |
| 3.428409e-36 | WDR75   | Activated Chemokine | 0.3338602  | 0.193 | 0.061 | 6.11251e-32  | 14 |
| 3.961268e-36 | METTL2B | Activated Chemokine | -0.3359525 | 0.998 | 0.997 | 7.062545e-32 | 14 |
| 6.293401e-36 | RPS4X   | Activated Chemokine | 0.3493674  | 0.243 | 0.094 | 1.12205e-31  | 14 |
| 6.527118e-36 | SEH1L   | Activated Chemokine | 0.4142591  | 0.438 | 0.237 | 1.16372e-31  | 14 |
| 6.562761e-36 | PTBP1   | Activated Chemokine | 0.3890317  | 0.353 | 0.162 | 1.170075e-31 | 14 |
| 6.823278e-36 | PITPNB  | Activated Chemokine | -0.6929253 | 0.261 | 0.406 | 1.216522e-31 | 14 |
| 7.252387e-36 | MBD4    | Activated Chemokine | -0.6421182 | 0.137 | 0.277 | 1.293028e-31 | 14 |
| 7.485591e-36 | RSRP1   | Activated Chemokine | 0.361982   | 0.239 | 0.09  | 1.334606e-31 | 14 |
| 7.617873e-36 | NSUN2   | Activated Chemokine | -0.4832673 | 0.03  | 0.142 | 1.358191e-31 | 14 |
| 8.429901e-36 | SOCS1   | Activated Chemokine | 0.4178281  | 0.475 | 0.27  | 1.502967e-31 | 14 |
| 8.55352e-36  | AUP1    | Activated Chemokine | 0.4115499  | 0.27  | 0.108 | 1.525007e-31 | 14 |
| 1.343618e-35 | NUDT4   | Activated Chemokine | -0.4857636 | 0.045 | 0.162 | 2.395537e-31 | 14 |
| 1.388324e-35 | IL10RA  | Activated Chemokine | -0.5913618 | 0.773 | 0.817 | 2.475242e-31 | 14 |
| 1.739991e-35 | NOP53   | Activated Chemokine | -0.4542624 | 0.031 | 0.15  | 3.10223e-31  | 14 |
| 1.80525e-35  | SH2B2   | Activated Chemokine | 0.3266977  | 0.203 | 0.067 | 3.218579e-31 | 14 |
| 2.374781e-35 | EXOSC2  | Activated Chemokine | -0.3824169 | 0.017 | 0.119 | 4.233997e-31 | 14 |
| 2.434726e-35 | ABI3    | Activated Chemokine | 0.3073778  | 0.204 | 0.065 | 4.340872e-31 | 14 |
| 2.613248e-35 | GTF2H2  | Activated Chemokine | 0.3253742  | 0.212 | 0.075 | 4.65916e-31  | 14 |
| 2.738709e-35 | DOHH    | Activated Chemokine | -0.6341081 | 0.126 | 0.24  | 4.882844e-31 | 14 |
| 2.740623e-35 | CAPG    | Activated Chemokine | -0.5257894 | 0.904 | 0.902 | 4.886257e-31 | 14 |
| 3.339249e-35 | MYL6    | Activated Chemokine | 0.3292866  | 0.175 | 0.049 | 5.953547e-31 | 14 |

|              |                     |       |       |              |    |     |
|--------------|---------------------|-------|-------|--------------|----|-----|
| CHST11       | Activated Chemokine |       |       |              |    |     |
| 3.796519e-35 | 0.3422737           | 0.728 | 0.518 | 6.768814e-31 | 14 |     |
| FKBP1A       | Activated Chemokine |       |       |              |    |     |
| 4.523155e-35 | 0.3689135           | 0.473 | 0.266 | 8.064334e-31 | 14 |     |
| MRPL54       | Activated Chemokine |       |       |              |    |     |
| 4.661121e-35 | 0.3896962           | 0.374 | 0.186 | 8.310312e-31 | 14 |     |
| FAM136A      | Activated Chemokine |       |       |              |    |     |
| 5.804913e-35 | 0.371504            | 0.314 | 0.142 | 1.034958e-30 | 14 | ME2 |
|              | Activated Chemokine |       |       |              |    |     |
| 6.706863e-35 | 0.3675172           | 0.295 | 0.124 | 1.195767e-30 | 14 |     |
| MTREX        | Activated Chemokine |       |       |              |    |     |
| 6.896905e-35 | 0.3950126           | 0.323 | 0.146 | 1.229649e-30 | 14 |     |
| ADSS         | Activated Chemokine |       |       |              |    |     |
| 7.101789e-35 | 0.4035644           | 0.335 | 0.159 | 1.266178e-30 | 14 |     |
| MRPL24       | Activated Chemokine |       |       |              |    |     |
| 7.379854e-35 | 0.3163393           | 0.673 | 0.451 | 1.315754e-30 | 14 |     |
| COX17        | Activated Chemokine |       |       |              |    |     |
| 8.015409e-35 | 0.3287057           | 0.179 | 0.054 | 1.429067e-30 | 14 |     |
| LINC00665    | Activated Chemokine |       |       |              |    |     |
| 9.385391e-35 | 0.3937769           | 0.261 | 0.11  | 1.673321e-30 | 14 |     |
| NIN          | Activated Chemokine |       |       |              |    |     |
| 1.10922e-34  | 0.3561569           | 0.583 | 0.367 | 1.977629e-30 | 14 |     |
| OSTC         | Activated Chemokine |       |       |              |    |     |
| 1.147398e-34 | 0.3796161           | 0.356 | 0.176 | 2.045695e-30 | 14 |     |
| SRA1         | Activated Chemokine |       |       |              |    |     |
| 1.222088e-34 | 0.3949929           | 0.528 | 0.327 | 2.178861e-30 | 14 |     |
| ACP1         | Activated Chemokine |       |       |              |    |     |
| 1.686573e-34 | 0.3772912           | 0.265 | 0.096 | 3.006991e-30 | 14 |     |
| PRNP         | Activated Chemokine |       |       |              |    |     |
| 2.202603e-34 | -0.724022           | 0.74  | 0.787 | 3.927021e-30 | 14 |     |
| ACTG1        | Activated Chemokine |       |       |              |    |     |
| 2.206105e-34 | 0.4023544           | 0.485 | 0.283 | 3.933265e-30 | 14 |     |
| U2SURP       | Activated Chemokine |       |       |              |    |     |
| 2.697908e-34 | -0.6934231          | 0.305 | 0.443 | 4.810101e-30 | 14 |     |
| RHOH         | Activated Chemokine |       |       |              |    |     |
| 3.091094e-34 | 0.3350099           | 0.224 | 0.082 | 5.511112e-30 | 14 |     |
| ZMPSTE24     | Activated Chemokine |       |       |              |    |     |
| 3.580279e-34 | 0.3278904           | 0.197 | 0.066 | 6.38328e-30  | 14 |     |
| DUS3L        | Activated Chemokine |       |       |              |    |     |
| 3.622374e-34 | 0.3603634           | 0.522 | 0.315 | 6.45833e-30  | 14 |     |
| PRPF40A      | Activated Chemokine |       |       |              |    |     |
| 3.756931e-34 | -0.6680773          | 0.372 | 0.495 | 6.698233e-30 | 14 |     |
| ANKRD12      | Activated Chemokine |       |       |              |    |     |
| 3.81446e-34  | 0.3029471           | 0.784 | 0.598 | 6.800801e-30 | 14 |     |
| LSM7         | Activated Chemokine |       |       |              |    |     |
| 3.900097e-34 | 0.3929985           | 0.53  | 0.326 | 6.953483e-30 | 14 |     |
| PSMD2        | Activated Chemokine |       |       |              |    |     |
| 3.917489e-34 | 0.3596631           | 0.657 | 0.446 | 6.984491e-30 | 14 |     |
| VCP          | Activated Chemokine |       |       |              |    |     |
| 3.976624e-34 | 0.3845462           | 0.615 | 0.392 | 7.089923e-30 | 14 |     |

|              |         |                     |            |       |       |              |    |
|--------------|---------|---------------------|------------|-------|-------|--------------|----|
| 4.46207e-34  | ATF4    | Activated Chemokine | 0.3595947  | 0.231 | 0.093 | 7.955425e-30 | 14 |
| 4.856491e-34 | ALG3    | Activated Chemokine | -0.6872819 | 0.182 | 0.327 | 8.658639e-30 | 14 |
| 4.85774e-34  | AES     | Activated Chemokine | 0.3726593  | 0.402 | 0.208 | 8.660864e-30 | 14 |
| 4.859794e-34 | TMX1    | Activated Chemokine | 0.3133344  | 0.775 | 0.579 | 8.664527e-30 | 14 |
| 5.618392e-34 | SAP18   | Activated Chemokine | 0.36561    | 0.343 | 0.168 | 1.001703e-29 | 14 |
| 5.969114e-34 | EMC7    | Activated Chemokine | 0.3835416  | 0.359 | 0.179 | 1.064233e-29 | 14 |
| 6.136846e-34 | YDJC    | Activated Chemokine | 0.4055878  | 0.393 | 0.216 | 1.094138e-29 | 14 |
| 6.680478e-34 | TAF9    | Activated Chemokine | 0.4375223  | 0.376 | 0.186 | 1.191062e-29 | 14 |
| 6.752769e-34 | RNF145  | Activated Chemokine | -0.8294262 | 0.397 | 0.5   | 1.203951e-29 | 14 |
| 7.722e-34    | SAT1    | Activated Chemokine | 0.3965079  | 0.535 | 0.327 | 1.376755e-29 | 14 |
| 7.766404e-34 | EIF3A   | Activated Chemokine | 0.3678977  | 0.421 | 0.225 | 1.384672e-29 | 14 |
| 7.968851e-34 | BTF3L4  | Activated Chemokine | 0.406888   | 0.3   | 0.135 | 1.420766e-29 | 14 |
| 8.140198e-34 | STX4    | Activated Chemokine | 0.3698694  | 0.506 | 0.304 | 1.451316e-29 | 14 |
| 1.127379e-33 | PSMD6   | Activated Chemokine | 0.3375398  | 0.699 | 0.485 | 2.010004e-29 | 14 |
| 1.153417e-33 | MRPL52  | Activated Chemokine | 0.3690828  | 0.338 | 0.164 | 2.056427e-29 | 14 |
| 1.354774e-33 | EXOSC3  | Activated Chemokine | 0.3812927  | 0.329 | 0.148 | 2.415426e-29 | 14 |
| 1.43334e-33  | PEA15   | Activated Chemokine | 0.3383947  | 0.626 | 0.403 | 2.555502e-29 | 14 |
| 2.50464e-33  | TMED9   | Activated Chemokine | 0.3548854  | 0.339 | 0.165 | 4.465522e-29 | 14 |
| 2.688471e-33 | RPL26L1 | Activated Chemokine | 0.3660412  | 0.336 | 0.154 | 4.793275e-29 | 14 |
| 2.793131e-33 | ASNSD1  | Activated Chemokine | -0.6442414 | 0.077 | 0.193 | 4.979873e-29 | 14 |
| 2.921409e-33 | DAAM1   | Activated Chemokine | 0.4157793  | 0.482 | 0.276 | 5.20858e-29  | 14 |
| 3.246235e-33 | MSM01   | Activated Chemokine | 0.3726948  | 0.292 | 0.138 | 5.787712e-29 | 14 |
| 3.500978e-33 | ATG101  | Activated Chemokine | 0.3773987  | 0.328 | 0.166 | 6.241894e-29 | 14 |
| 3.949538e-33 | POLDIP2 | Activated Chemokine | 0.3121751  | 0.704 | 0.486 | 7.041632e-29 | 14 |
| 4.083237e-33 | SF3B6   | Activated Chemokine | -0.5975177 | 0.136 | 0.266 | 7.280003e-29 | 14 |

|              |          |                     |            |       |       |              |    |
|--------------|----------|---------------------|------------|-------|-------|--------------|----|
| 4.268649e-33 | DAPP1    | Activated Chemokine | 0.3705888  | 0.282 | 0.125 | 7.610574e-29 | 14 |
| 5.122066e-33 | NOL8     | Activated Chemokine | 0.3737059  | 0.375 | 0.197 | 9.132132e-29 | 14 |
| 6.289129e-33 | NUBP1    | Activated Chemokine | 0.417721   | 0.3   | 0.129 | 1.121289e-28 | 14 |
| 6.571588e-33 | NFKB2    | Activated Chemokine | 0.3070619  | 0.201 | 0.069 | 1.171648e-28 | 14 |
| 6.582403e-33 | TFB2M    | Activated Chemokine | 0.3592255  | 0.273 | 0.119 | 1.173577e-28 | 14 |
| 6.777913e-33 | NUP62    | Activated Chemokine | 0.3146403  | 0.806 | 0.622 | 1.208434e-28 | 14 |
| 6.922854e-33 | SELENOH  | Activated Chemokine | -0.6152783 | 0.164 | 0.289 | 1.234276e-28 | 14 |
| 7.610842e-33 | PLEKHF2  | Activated Chemokine | 0.3690665  | 0.26  | 0.107 | 1.356937e-28 | 14 |
| 8.179513e-33 | C20orf27 | Activated Chemokine | 0.376641   | 0.441 | 0.257 | 1.458325e-28 | 14 |
| 8.64113e-33  | PSMC2    | Activated Chemokine | -0.5486269 | 0.016 | 0.111 | 1.540627e-28 | 14 |
| 8.693593e-33 | VPREB3   | Activated Chemokine | 0.3471492  | 0.392 | 0.202 | 1.549981e-28 | 14 |
| 1.079576e-32 | TRAPPC4  | Activated Chemokine | 0.34213    | 0.244 | 0.099 | 1.924775e-28 | 14 |
| 1.330835e-32 | C12orf45 | Activated Chemokine | 0.3792194  | 0.644 | 0.439 | 2.372747e-28 | 14 |
| 1.42382e-32  | ATP5MC1  | Activated Chemokine | 0.3632556  | 0.352 | 0.178 | 2.538529e-28 | 14 |
| 1.507418e-32 | E2F4     | Activated Chemokine | -0.6348656 | 0.374 | 0.505 | 2.687575e-28 | 14 |
| 2.044369e-32 | PSMB9    | Activated Chemokine | 0.3182249  | 0.726 | 0.518 | 3.644905e-28 | 14 |
| 2.604867e-32 | SELENOT  | Activated Chemokine | -0.6768168 | 0.335 | 0.448 | 4.644217e-28 | 14 |
| 3.564137e-32 | KLF6     | Activated Chemokine | -0.6730246 | 0.398 | 0.515 | 6.3545e-28   | 14 |
| 3.881063e-32 | BANK1    | Activated Chemokine | 0.3657531  | 0.359 | 0.179 | 6.919547e-28 | 14 |
| 4.038288e-32 | GNL1     | Activated Chemokine | -0.6166877 | 0.172 | 0.3   | 7.199863e-28 | 14 |
| 5.080694e-32 | PDLIM1   | Activated Chemokine | 0.3519977  | 0.272 | 0.121 | 9.058369e-28 | 14 |
| 5.445208e-32 | NUP93    | Activated Chemokine | 0.3213673  | 0.687 | 0.47  | 9.708262e-28 | 14 |
| 5.815247e-32 | VAPA     | Activated Chemokine | -0.7123423 | 0.338 | 0.44  | 1.0368e-27   | 14 |
| 7.328789e-32 | COTL1    | Activated Chemokine | 0.3522538  | 0.453 | 0.252 | 1.30665e-27  | 14 |
| 8.089448e-32 | MRPS26   | Activated Chemokine | 0.3229209  | 0.222 | 0.08  | 1.442268e-27 | 14 |

|              |                     |       |       |              |    |     |
|--------------|---------------------|-------|-------|--------------|----|-----|
| RBM28        | Activated Chemokine |       |       |              |    |     |
| 9.532429e-32 | 0.3192308           | 0.633 | 0.412 | 1.699537e-27 | 14 |     |
| RAB7A        | Activated Chemokine |       |       |              |    |     |
| 9.554323e-32 | 0.360773            | 0.29  | 0.123 | 1.70344e-27  | 14 |     |
| IFRD1        | Activated Chemokine |       |       |              |    |     |
| 1.17314e-31  | 0.3617401           | 0.272 | 0.109 | 2.091591e-27 | 14 |     |
| NOC3L        | Activated Chemokine |       |       |              |    |     |
| 1.223213e-31 | 0.384298            | 0.589 | 0.387 | 2.180866e-27 | 14 | SSB |
|              | Activated Chemokine |       |       |              |    |     |
| 1.243282e-31 | -0.7316954          | 0.673 | 0.726 | 2.216648e-27 | 14 |     |
| LIMD2        | Activated Chemokine |       |       |              |    |     |
| 1.268087e-31 | 0.3508448           | 0.555 | 0.34  | 2.260872e-27 | 14 |     |
| RNH1         | Activated Chemokine |       |       |              |    |     |
| 1.467007e-31 | -0.7624319          | 0.102 | 0.214 | 2.615527e-27 | 14 |     |
| PLAC8        | Activated Chemokine |       |       |              |    |     |
| 1.497406e-31 | 0.3527351           | 0.361 | 0.183 | 2.669725e-27 | 14 |     |
| REX02        | Activated Chemokine |       |       |              |    |     |
| 1.59269e-31  | 0.4141158           | 0.406 | 0.225 | 2.839607e-27 | 14 |     |
| CCDC85B      | Activated Chemokine |       |       |              |    |     |
| 1.874762e-31 | -0.972061           | 0.102 | 0.208 | 3.342514e-27 | 14 |     |
| LGALS1       | Activated Chemokine |       |       |              |    |     |
| 2.09692e-31  | -0.5408733          | 0.061 | 0.189 | 3.738599e-27 | 14 |     |
| P2RX5        | Activated Chemokine |       |       |              |    |     |
| 2.984225e-31 | 0.3448121           | 0.553 | 0.348 | 5.320575e-27 | 14 |     |
| PSMD13       | Activated Chemokine |       |       |              |    |     |
| 2.991817e-31 | 0.3482882           | 0.328 | 0.158 | 5.334111e-27 | 14 |     |
| WDR77        | Activated Chemokine |       |       |              |    |     |
| 3.232766e-31 | 0.3349319           | 0.659 | 0.451 | 5.763698e-27 | 14 |     |
| PSMD4        | Activated Chemokine |       |       |              |    |     |
| 3.423097e-31 | 0.3048791           | 0.167 | 0.052 | 6.103039e-27 | 14 |     |
| MAPK13       | Activated Chemokine |       |       |              |    |     |
| 3.644511e-31 | 0.3940721           | 0.445 | 0.263 | 6.497798e-27 | 14 |     |
| PPP1R2       | Activated Chemokine |       |       |              |    |     |
| 3.97452e-31  | 0.3533955           | 0.484 | 0.292 | 7.086172e-27 | 14 |     |
| MRPL57       | Activated Chemokine |       |       |              |    |     |
| 4.188431e-31 | 0.3377792           | 0.283 | 0.139 | 7.467553e-27 | 14 |     |
| WDR18        | Activated Chemokine |       |       |              |    |     |
| 4.595259e-31 | 0.3811928           | 0.364 | 0.166 | 8.192888e-27 | 14 |     |
| BCL2         | Activated Chemokine |       |       |              |    |     |
| 4.957055e-31 | -0.7152803          | 0.174 | 0.306 | 8.837933e-27 | 14 |     |
| BCL7A        | Activated Chemokine |       |       |              |    |     |
| 5.498209e-31 | 0.3813063           | 0.416 | 0.235 | 9.802756e-27 | 14 |     |
| DDX1         | Activated Chemokine |       |       |              |    |     |
| 6.101878e-31 | 0.3412169           | 0.579 | 0.374 | 1.087904e-26 | 14 |     |
| VDAC2        | Activated Chemokine |       |       |              |    |     |
| 8.669636e-31 | -0.5912782          | 0.617 | 0.705 | 1.545709e-26 | 14 |     |
| COMMD6       | Activated Chemokine |       |       |              |    |     |
| 9.518159e-31 | 0.3759393           | 0.408 | 0.221 | 1.696993e-26 | 14 |     |
| RPF1         | Activated Chemokine |       |       |              |    |     |
| 9.722105e-31 | -0.5262861          | 0.101 | 0.22  | 1.733354e-26 | 14 |     |

|              |           |                     |            |       |       |              |    |
|--------------|-----------|---------------------|------------|-------|-------|--------------|----|
| 1.022947e-30 | PNKD      | Activated Chemokine | -0.6828467 | 0.375 | 0.487 | 1.823812e-26 | 14 |
| 1.389808e-30 | NEAT1     | Activated Chemokine | -0.6135238 | 0.163 | 0.287 | 2.477888e-26 | 14 |
| 1.555511e-30 | CARHSP1   | Activated Chemokine | 0.3390332  | 0.566 | 0.342 | 2.77332e-26  | 14 |
| 1.635016e-30 | LITAF     | Activated Chemokine | -0.6345391 | 0.187 | 0.324 | 2.915069e-26 | 14 |
| 2.463236e-30 | TNFRSF13C | Activated Chemokine | 0.3452739  | 0.324 | 0.168 | 4.391704e-26 | 14 |
| 2.823442e-30 | CBWD1     | Activated Chemokine | -0.4203701 | 0.017 | 0.106 | 5.033914e-26 | 14 |
| 2.937375e-30 | RMI2      | Activated Chemokine | -0.6428868 | 0.172 | 0.288 | 5.237046e-26 | 14 |
| 3.737895e-30 | SP110     | Activated Chemokine | 0.3434426  | 0.395 | 0.203 | 6.664292e-26 | 14 |
| 3.930706e-30 | PITHD1    | Activated Chemokine | 0.3164057  | 0.232 | 0.099 | 7.008056e-26 | 14 |
| 4.920952e-30 | BOLA3     | Activated Chemokine | 0.3036362  | 0.417 | 0.221 | 8.773565e-26 | 14 |
| 5.218598e-30 | KDEL2     | Activated Chemokine | 0.3617388  | 0.412 | 0.236 | 9.304238e-26 | 14 |
| 5.231123e-30 | MORF4L2   | Activated Chemokine | 0.3922362  | 0.382 | 0.204 | 9.326569e-26 | 14 |
| 5.680197e-30 | LARS      | Activated Chemokine | 0.3127012  | 0.214 | 0.081 | 1.012722e-25 | 14 |
| 6.171655e-30 | MAPKAPK5  | Activated Chemokine | -0.6343175 | 0.191 | 0.316 | 1.100344e-25 | 14 |
| 8.168014e-30 | PSIP1     | Activated Chemokine | -0.4928167 | 0.994 | 0.98  | 1.456275e-25 | 14 |
| 8.637638e-30 | MT-C01    | Activated Chemokine | -0.4633582 | 0.026 | 0.121 | 1.540004e-25 | 14 |
| 1.031905e-29 | CD38      | Activated Chemokine | -0.5837968 | 0.141 | 0.27  | 1.839783e-25 | 14 |
| 1.090923e-29 | ALOX5AP   | Activated Chemokine | 0.3627032  | 0.425 | 0.236 | 1.945007e-25 | 14 |
| 1.465877e-29 | SLC38A1   | Activated Chemokine | 0.3106893  | 0.653 | 0.44  | 2.613512e-25 | 14 |
| 1.562431e-29 | YWHAQ     | Activated Chemokine | -0.5830364 | 0.126 | 0.234 | 2.785658e-25 | 14 |
| 1.861763e-29 | HSD17B11  | Activated Chemokine | 0.3373471  | 0.174 | 0.06  | 3.319336e-25 | 14 |
| 2.754453e-29 | ZC3H12A   | Activated Chemokine | 0.3247315  | 0.578 | 0.375 | 4.910915e-25 | 14 |
| 2.951747e-29 | RBM25     | Activated Chemokine | 0.327158   | 0.273 | 0.123 | 5.26267e-25  | 14 |
| 2.972018e-29 | BMS1      | Activated Chemokine | 0.3424273  | 0.289 | 0.133 | 5.29881e-25  | 14 |
| 3.658596e-29 | QTRT1     | Activated Chemokine | 0.374249   | 0.401 | 0.224 | 6.522911e-25 | 14 |

|              |                     |       |       |              |    |     |
|--------------|---------------------|-------|-------|--------------|----|-----|
| SINHCAF      | Activated Chemokine |       |       |              |    |     |
| 3.984191e-29 | 0.3106594           | 0.206 | 0.082 | 7.103414e-25 | 14 |     |
| TRNT1        | Activated Chemokine |       |       |              |    |     |
| 4.129395e-29 | -0.5175765          | 0.135 | 0.262 | 7.362299e-25 | 14 |     |
| ILK          | Activated Chemokine |       |       |              |    |     |
| 4.23129e-29  | 0.3089246           | 0.536 | 0.332 | 7.543967e-25 | 14 |     |
| PPM1G        | Activated Chemokine |       |       |              |    |     |
| 7.365094e-29 | 0.3541512           | 0.272 | 0.118 | 1.313123e-24 | 14 |     |
| IARS         | Activated Chemokine |       |       |              |    |     |
| 9.398175e-29 | 0.3273665           | 0.26  | 0.11  | 1.675601e-24 | 14 |     |
| SPOUT1       | Activated Chemokine |       |       |              |    |     |
| 9.775794e-29 | 0.3169233           | 0.228 | 0.093 | 1.742926e-24 | 14 |     |
| PRPF4        | Activated Chemokine |       |       |              |    |     |
| 9.78464e-29  | 0.349681            | 0.462 | 0.27  | 1.744503e-24 | 14 | SRI |
|              | Activated Chemokine |       |       |              |    |     |
| 1.013259e-28 | -0.3947167          | 0.027 | 0.123 | 1.806539e-24 | 14 |     |
| VNN2         | Activated Chemokine |       |       |              |    |     |
| 1.076455e-28 | 0.3101298           | 0.219 | 0.078 | 1.919212e-24 | 14 |     |
| TMEM192      | Activated Chemokine |       |       |              |    |     |
| 1.091084e-28 | -0.5088979          | 0.06  | 0.176 | 1.945294e-24 | 14 |     |
| TMEM156      | Activated Chemokine |       |       |              |    |     |
| 1.144463e-28 | 0.3241197           | 0.441 | 0.266 | 2.040463e-24 | 14 |     |
| TOP1         | Activated Chemokine |       |       |              |    |     |
| 1.205745e-28 | 0.345283            | 0.426 | 0.243 | 2.149722e-24 | 14 |     |
| UBA2         | Activated Chemokine |       |       |              |    |     |
| 1.481501e-28 | 0.3392121           | 0.347 | 0.179 | 2.641368e-24 | 14 |     |
| AHCY         | Activated Chemokine |       |       |              |    |     |
| 1.539255e-28 | 0.3330577           | 0.56  | 0.364 | 2.744337e-24 | 14 |     |
| CDC37        | Activated Chemokine |       |       |              |    |     |
| 1.583688e-28 | -0.6424301          | 0.173 | 0.288 | 2.823557e-24 | 14 |     |
| PPM1K        | Activated Chemokine |       |       |              |    |     |
| 1.936875e-28 | -0.6354951          | 0.092 | 0.205 | 3.453254e-24 | 14 |     |
| HMCES        | Activated Chemokine |       |       |              |    |     |
| 2.527182e-28 | 0.3263151           | 0.19  | 0.075 | 4.505712e-24 | 14 |     |
| GLA          | Activated Chemokine |       |       |              |    |     |
| 2.614004e-28 | 0.3328739           | 0.484 | 0.296 | 4.660508e-24 | 14 |     |
| SRP72        | Activated Chemokine |       |       |              |    |     |
| 2.874805e-28 | 0.3130735           | 0.252 | 0.109 | 5.125489e-24 | 14 |     |
| MCRIP2       | Activated Chemokine |       |       |              |    |     |
| 3.062088e-28 | 0.3258228           | 0.284 | 0.129 | 5.459396e-24 | 14 |     |
| LSM12        | Activated Chemokine |       |       |              |    |     |
| 3.285438e-28 | 0.3032063           | 0.72  | 0.525 | 5.857607e-24 | 14 |     |
| JTB          | Activated Chemokine |       |       |              |    |     |
| 3.383134e-28 | 0.3472626           | 0.388 | 0.225 | 6.03179e-24  | 14 |     |
| HDDC2        | Activated Chemokine |       |       |              |    |     |
| 3.401411e-28 | 0.3378549           | 0.275 | 0.13  | 6.064375e-24 | 14 |     |
| MRPS2        | Activated Chemokine |       |       |              |    |     |
| 3.699706e-28 | -3.265311           | 0.37  | 0.452 | 6.596205e-24 | 14 |     |
| IGHG3        | Activated Chemokine |       |       |              |    |     |
| 3.850027e-28 | -0.4833074          | 0.048 | 0.156 | 6.864213e-24 | 14 |     |

|              |                     |       |       |              |    |  |
|--------------|---------------------|-------|-------|--------------|----|--|
| CD81         | Activated Chemokine |       |       |              |    |  |
| 4.717815e-28 | -0.5071802          | 0.059 | 0.16  | 8.411393e-24 | 14 |  |
| GLIPR1       | Activated Chemokine |       |       |              |    |  |
| 4.978951e-28 | 0.3266118           | 0.351 | 0.183 | 8.876972e-24 | 14 |  |
| TUSC2        | Activated Chemokine |       |       |              |    |  |
| 1.114984e-27 | -0.7273227          | 0.665 | 0.694 | 1.987905e-23 | 14 |  |
| EZR          | Activated Chemokine |       |       |              |    |  |
| 1.34046e-27  | 0.3198757           | 0.345 | 0.177 | 2.389906e-23 | 14 |  |
| UTP18        | Activated Chemokine |       |       |              |    |  |
| 1.518271e-27 | -0.571162           | 0.147 | 0.259 | 2.706925e-23 | 14 |  |
| LYSMD2       | Activated Chemokine |       |       |              |    |  |
| 1.614781e-27 | -0.6349066          | 0.339 | 0.447 | 2.878992e-23 | 14 |  |
| ANXA2        | Activated Chemokine |       |       |              |    |  |
| 1.686269e-27 | 0.3125882           | 0.514 | 0.318 | 3.006449e-23 | 14 |  |
| MLF2         | Activated Chemokine |       |       |              |    |  |
| 1.710195e-27 | -0.5483223          | 0.167 | 0.288 | 3.049107e-23 | 14 |  |
| YPEL5        | Activated Chemokine |       |       |              |    |  |
| 1.714482e-27 | -0.5933455          | 0.544 | 0.624 | 3.05675e-23  | 14 |  |
| ARPC1B       | Activated Chemokine |       |       |              |    |  |
| 1.82439e-27  | -0.5713212          | 0.125 | 0.239 | 3.252705e-23 | 14 |  |
| CCND3        | Activated Chemokine |       |       |              |    |  |
| 2.072346e-27 | -1.083635           | 0.34  | 0.43  | 3.694786e-23 | 14 |  |
| STMN1        | Activated Chemokine |       |       |              |    |  |
| 2.699928e-27 | 0.3369698           | 0.359 | 0.188 | 4.813701e-23 | 14 |  |
| UTP6         | Activated Chemokine |       |       |              |    |  |
| 2.98499e-27  | 0.3236271           | 0.238 | 0.101 | 5.321939e-23 | 14 |  |
| LPCAT1       | Activated Chemokine |       |       |              |    |  |
| 3.796902e-27 | 0.4385275           | 0.449 | 0.273 | 6.769497e-23 | 14 |  |
| GADD45B      | Activated Chemokine |       |       |              |    |  |
| 3.835915e-27 | -0.5254328          | 0.13  | 0.243 | 6.839053e-23 | 14 |  |
| MCUB         | Activated Chemokine |       |       |              |    |  |
| 3.919249e-27 | 0.3346715           | 0.476 | 0.286 | 6.987629e-23 | 14 |  |
| PYURF        | Activated Chemokine |       |       |              |    |  |
| 3.929718e-27 | -0.477704           | 0.082 | 0.182 | 7.006295e-23 | 14 |  |
| LYL1         | Activated Chemokine |       |       |              |    |  |
| 4.371033e-27 | 0.3012903           | 0.267 | 0.117 | 7.793114e-23 | 14 |  |
| SURF2        | Activated Chemokine |       |       |              |    |  |
| 4.851287e-27 | -0.5067638          | 0.061 | 0.163 | 8.64936e-23  | 14 |  |
| C12orf75     | Activated Chemokine |       |       |              |    |  |
| 5.053937e-27 | 0.342198            | 0.312 | 0.162 | 9.010665e-23 | 14 |  |
| U2AF2        | Activated Chemokine |       |       |              |    |  |
| 5.150835e-27 | -0.3945921          | 0.022 | 0.108 | 9.183423e-23 | 14 |  |
| HRK          | Activated Chemokine |       |       |              |    |  |
| 5.883386e-27 | -0.4725222          | 0.087 | 0.2   | 1.048949e-22 | 14 |  |
| POLD4        | Activated Chemokine |       |       |              |    |  |
| 7.19352e-27  | -0.5419999          | 0.183 | 0.304 | 1.282533e-22 | 14 |  |
| CDK2AP2      | Activated Chemokine |       |       |              |    |  |
| 7.289334e-27 | 0.3072476           | 0.198 | 0.077 | 1.299615e-22 | 14 |  |
| LRPPRC       | Activated Chemokine |       |       |              |    |  |
| 7.294941e-27 | -0.5789276          | 0.197 | 0.314 | 1.300615e-22 | 14 |  |



|              |                     |       |       |              |    |  |
|--------------|---------------------|-------|-------|--------------|----|--|
| IL16         | Activated Chemokine |       |       |              |    |  |
| 7.952768e-27 | 0.3264604           | 0.417 | 0.238 | 1.417899e-22 | 14 |  |
| BCAS2        | Activated Chemokine |       |       |              |    |  |
| 1.121169e-26 | -0.4777329          | 0.067 | 0.169 | 1.998932e-22 | 14 |  |
| SNX10        | Activated Chemokine |       |       |              |    |  |
| 1.141188e-26 | -0.3330509          | 0.916 | 0.947 | 2.034624e-22 | 14 |  |
| HLA-DRA      | Activated Chemokine |       |       |              |    |  |
| 1.142093e-26 | 0.3502961           | 0.407 | 0.22  | 2.036237e-22 | 14 |  |
| TMEM109      | Activated Chemokine |       |       |              |    |  |
| 1.154182e-26 | -0.3580317          | 0.017 | 0.103 | 2.05779e-22  | 14 |  |
| MYBL2        | Activated Chemokine |       |       |              |    |  |
| 1.16597e-26  | 0.3147704           | 0.54  | 0.345 | 2.078808e-22 | 14 |  |
| PDIA6        | Activated Chemokine |       |       |              |    |  |
| 1.185337e-26 | 0.3165983           | 0.348 | 0.19  | 2.113337e-22 | 14 |  |
| HARS         | Activated Chemokine |       |       |              |    |  |
| 1.413313e-26 | 0.3160024           | 0.217 | 0.09  | 2.519795e-22 | 14 |  |
| PSMG4        | Activated Chemokine |       |       |              |    |  |
| 1.42392e-26  | 0.3185658           | 0.439 | 0.256 | 2.538706e-22 | 14 |  |
| BAZ1A        | Activated Chemokine |       |       |              |    |  |
| 1.438099e-26 | 0.3238819           | 0.412 | 0.242 | 2.563987e-22 | 14 |  |
| PRPF31       | Activated Chemokine |       |       |              |    |  |
| 1.470575e-26 | 0.3128037           | 0.461 | 0.278 | 2.621888e-22 | 14 |  |
| IMP3         | Activated Chemokine |       |       |              |    |  |
| 1.502709e-26 | -0.6239874          | 0.181 | 0.271 | 2.67918e-22  | 14 |  |
| GPR183       | Activated Chemokine |       |       |              |    |  |
| 1.544717e-26 | -0.4098556          | 0.05  | 0.152 | 2.754075e-22 | 14 |  |
| PTPN18       | Activated Chemokine |       |       |              |    |  |
| 2.195813e-26 | -0.4164455          | 0.988 | 0.99  | 3.914916e-22 | 14 |  |
| ACTB         | Activated Chemokine |       |       |              |    |  |
| 2.371196e-26 | 0.3075938           | 0.318 | 0.158 | 4.227604e-22 | 14 |  |
| CWC25        | Activated Chemokine |       |       |              |    |  |
| 2.433603e-26 | 0.3409078           | 0.658 | 0.471 | 4.338872e-22 | 14 |  |
| TNFAIP8      | Activated Chemokine |       |       |              |    |  |
| 2.56443e-26  | -1.534784           | 0.132 | 0.218 | 4.572121e-22 | 14 |  |
| IGHG1        | Activated Chemokine |       |       |              |    |  |
| 3.053156e-26 | 0.3264011           | 0.37  | 0.203 | 5.443471e-22 | 14 |  |
| FUNDC2       | Activated Chemokine |       |       |              |    |  |
| 3.10479e-26  | -0.3739288          | 0.024 | 0.113 | 5.535529e-22 | 14 |  |
| AC023590.1   | Activated Chemokine |       |       |              |    |  |
| 3.310004e-26 | -1.342163           | 0.08  | 0.178 | 5.901406e-22 | 14 |  |
| MZB1         | Activated Chemokine |       |       |              |    |  |
| 3.405186e-26 | 0.3151444           | 0.439 | 0.254 | 6.071106e-22 | 14 |  |
| PWP1         | Activated Chemokine |       |       |              |    |  |
| 3.410929e-26 | 0.3371163           | 0.361 | 0.206 | 6.081345e-22 | 14 |  |
| TMEM167A     | Activated Chemokine |       |       |              |    |  |
| 5.699681e-26 | -0.5031047          | 0.122 | 0.242 | 1.016196e-21 | 14 |  |
| NCF4         | Activated Chemokine |       |       |              |    |  |
| 5.847259e-26 | 0.305083            | 0.246 | 0.114 | 1.042508e-21 | 14 |  |
| CRLS1        | Activated Chemokine |       |       |              |    |  |
| 8.602314e-26 | 0.3084274           | 0.672 | 0.479 | 1.533707e-21 | 14 |  |

|              |         |                     |            |       |       |              |    |
|--------------|---------|---------------------|------------|-------|-------|--------------|----|
| 9.285979e-26 | WDR830S | Activated Chemokine | 0.3080565  | 0.298 | 0.151 | 1.655597e-21 | 14 |
| 1.213388e-25 | ALG5    | Activated Chemokine | 0.303558   | 0.473 | 0.28  | 2.163349e-21 | 14 |
| 1.736886e-25 | ATP6AP2 | Activated Chemokine | 0.3356582  | 0.377 | 0.199 | 3.096695e-21 | 14 |
| 1.843711e-25 | NDFIP1  | Activated Chemokine | -0.5609875 | 0.582 | 0.681 | 3.287152e-21 | 14 |
| 2.029156e-25 | HLA-DMA | Activated Chemokine | 0.3115047  | 0.412 | 0.23  | 3.617783e-21 | 14 |
| 2.099472e-25 | DNAJC19 | Activated Chemokine | 0.3074588  | 0.414 | 0.248 | 3.743148e-21 | 14 |
| 2.320176e-25 | MCTS1   | Activated Chemokine | 0.3288634  | 0.245 | 0.113 | 4.136642e-21 | 14 |
| 2.414584e-25 | PTP4A1  | Activated Chemokine | 0.3192399  | 0.335 | 0.177 | 4.304962e-21 | 14 |
| 2.435904e-25 | PLRG1   | Activated Chemokine | -0.5132364 | 0.169 | 0.28  | 4.342972e-21 | 14 |
| 2.958612e-25 | CCNG1   | Activated Chemokine | 0.3033059  | 0.474 | 0.299 | 5.27491e-21  | 14 |
| 3.131894e-25 | SNF8    | Activated Chemokine | 0.3147572  | 0.383 | 0.212 | 5.583854e-21 | 14 |
| 3.141583e-25 | CANX    | Activated Chemokine | -0.5349404 | 0.491 | 0.619 | 5.601128e-21 | 14 |
| 3.438691e-25 | MEF2C   | Activated Chemokine | 0.3201717  | 0.349 | 0.194 | 6.130842e-21 | 14 |
| 3.77586e-25  | UQCC2   | Activated Chemokine | 0.312132   | 0.534 | 0.341 | 6.73198e-21  | 14 |
| 4.121178e-25 | DNAJB6  | Activated Chemokine | -0.4188585 | 0.033 | 0.115 | 7.347648e-21 | 14 |
| 4.233286e-25 | PBXIP1  | Activated Chemokine | 0.3032801  | 0.403 | 0.229 | 7.547525e-21 | 14 |
| 4.264325e-25 | SMARCA5 | Activated Chemokine | -0.5172316 | 0.105 | 0.204 | 7.602865e-21 | 14 |
| 4.361449e-25 | TRIM38  | Activated Chemokine | -0.5011517 | 0.138 | 0.253 | 7.776028e-21 | 14 |
| 4.481996e-25 | WIPF1   | Activated Chemokine | -0.5129289 | 0.16  | 0.269 | 7.99095e-21  | 14 |
| 4.587455e-25 | GRN     | Activated Chemokine | 0.3194845  | 0.378 | 0.219 | 8.178973e-21 | 14 |
| 4.948512e-25 | LSM1    | Activated Chemokine | -0.5387256 | 0.158 | 0.277 | 8.822702e-21 | 14 |
| 5.293017e-25 | ITGAE   | Activated Chemokine | 0.3212267  | 0.595 | 0.418 | 9.43692e-21  | 14 |
| 5.523805e-25 | TMEM123 | Activated Chemokine | 0.3070469  | 0.501 | 0.32  | 9.848392e-21 | 14 |
| 5.637554e-25 | NDUFB6  | Activated Chemokine | -0.4750544 | 0.06  | 0.147 | 1.00512e-20  | 14 |
| 8.33719e-25  | SUN2    | Activated Chemokine | 0.3173582  | 0.298 | 0.147 | 1.486438e-20 | 14 |

|              |           |                     |            |       |       |              |    |
|--------------|-----------|---------------------|------------|-------|-------|--------------|----|
| 1.152806e-24 | AFG3L2    | Activated Chemokine | -0.4120795 | 0.05  | 0.146 | 2.055337e-20 | 14 |
| 1.154526e-24 | HSH2D     | Activated Chemokine | -0.6405603 | 0.201 | 0.299 | 2.058404e-20 | 14 |
| 1.267243e-24 | LINC00926 | Activated Chemokine | 0.3153548  | 0.433 | 0.255 | 2.259367e-20 | 14 |
| 1.290682e-24 | NAA50     | Activated Chemokine | 0.3160642  | 0.172 | 0.071 | 2.301157e-20 | 14 |
| 1.365516e-24 | SPAG9     | Activated Chemokine | 0.324685   | 0.36  | 0.199 | 2.434578e-20 | 14 |
| 1.429561e-24 | MRPL23    | Activated Chemokine | -0.5513972 | 0.49  | 0.566 | 2.548763e-20 | 14 |
| 1.520336e-24 | ERP29     | Activated Chemokine | 0.3105301  | 0.539 | 0.362 | 2.710608e-20 | 14 |
| 1.797395e-24 | RPS19BP1  | Activated Chemokine | 0.3137493  | 0.434 | 0.255 | 3.204576e-20 | 14 |
| 1.824294e-24 | RAB10     | Activated Chemokine | -0.5037305 | 0.137 | 0.244 | 3.252533e-20 | 14 |
| 2.215267e-24 | NCOA3     | Activated Chemokine | 0.308449   | 0.241 | 0.118 | 3.949599e-20 | 14 |
| 2.253602e-24 | SNHG9     | Activated Chemokine | 0.3092034  | 0.437 | 0.269 | 4.017948e-20 | 14 |
| 2.319192e-24 | CAMTA1    | Activated Chemokine | -0.5581921 | 0.309 | 0.421 | 4.134887e-20 | 14 |
| 2.499863e-24 | CTSH      | Activated Chemokine | -0.5086194 | 0.145 | 0.252 | 4.457005e-20 | 14 |
| 3.809263e-24 | SH3KBP1   | Activated Chemokine | -0.5660299 | 0.113 | 0.199 | 6.791535e-20 | 14 |
| 4.086995e-24 | ACP5      | Activated Chemokine | -0.5813795 | 0.155 | 0.251 | 7.286703e-20 | 14 |
| 4.841054e-24 | TNFRSF13B | Activated Chemokine | -0.4560533 | 0.067 | 0.171 | 8.631115e-20 | 14 |
| 5.276858e-24 | SEL1L3    | Activated Chemokine | -1.572495  | 0.235 | 0.304 | 9.408111e-20 | 14 |
| 5.331221e-24 | HMGB2     | Activated Chemokine | 0.3146351  | 0.361 | 0.198 | 9.505035e-20 | 14 |
| 6.660658e-24 | NGDN      | Activated Chemokine | -0.5881459 | 0.299 | 0.396 | 1.187529e-19 | 14 |
| 7.350171e-24 | SYPL1     | Activated Chemokine | 0.3305975  | 0.609 | 0.436 | 1.310462e-19 | 14 |
| 9.572115e-24 | FDPS      | Activated Chemokine | -0.5142586 | 0.167 | 0.281 | 1.706612e-19 | 14 |
| 9.629961e-24 | STK17B    | Activated Chemokine | -0.4964027 | 0.15  | 0.264 | 1.716926e-19 | 14 |
| 1.168976e-23 | CCDC69    | Activated Chemokine | -0.4233586 | 0.061 | 0.147 | 2.084167e-19 | 14 |
| 1.553511e-23 | GNB5      | Activated Chemokine | -0.4408235 | 0.058 | 0.15  | 2.769755e-19 | 14 |
| 2.746383e-23 | ALOX5     | Activated Chemokine | -0.6072379 | 0.245 | 0.341 | 4.896526e-19 | 14 |

|              |          |                     |            |       |       |              |    |
|--------------|----------|---------------------|------------|-------|-------|--------------|----|
| 2.913908e-23 | STK17A   | Activated Chemokine | -0.4047559 | 0.993 | 0.978 | 5.195206e-19 | 14 |
| 3.532557e-23 | MT-C02   | Activated Chemokine | -0.4796583 | 0.042 | 0.151 | 6.298196e-19 | 14 |
| 3.888449e-23 | BIK      | Activated Chemokine | -0.3936983 | 0.044 | 0.14  | 6.932715e-19 | 14 |
| 5.124077e-23 | SIT1     | Activated Chemokine | -1.163711  | 0.078 | 0.149 | 9.135716e-19 | 14 |
| 5.79965e-23  | IGHA1    | Activated Chemokine | -0.5301251 | 0.319 | 0.416 | 1.03402e-18  | 14 |
| 6.166698e-23 | NPC2     | Activated Chemokine | 0.3175683  | 0.498 | 0.334 | 1.099461e-18 | 14 |
| 7.107075e-23 | SPIB     | Activated Chemokine | -0.5978189 | 0.087 | 0.188 | 1.26712e-18  | 14 |
| 8.294359e-23 | RGS2     | Activated Chemokine | -0.4970806 | 0.15  | 0.256 | 1.478801e-18 | 14 |
| 8.844394e-23 | PRMT2    | Activated Chemokine | -0.4251393 | 0.075 | 0.17  | 1.576867e-18 | 14 |
| 8.87231e-23  | BNIP3L   | Activated Chemokine | -0.3444043 | 0.036 | 0.113 | 1.581844e-18 | 14 |
| 1.074039e-22 | CRIP1    | Activated Chemokine | -0.5061539 | 0.21  | 0.321 | 1.914904e-18 | 14 |
| 1.205998e-22 | FCRLA    | Activated Chemokine | -0.6629414 | 0.939 | 0.932 | 2.150175e-18 | 14 |
| 1.382374e-22 | HMGB1    | Activated Chemokine | -0.4982954 | 0.101 | 0.209 | 2.464635e-18 | 14 |
| 1.455802e-22 | EAF2     | Activated Chemokine | 0.3004475  | 0.375 | 0.217 | 2.59555e-18  | 14 |
| 1.680034e-22 | POLE3    | Activated Chemokine | 0.3129219  | 0.373 | 0.222 | 2.995333e-18 | 14 |
| 1.883577e-22 | BAG1     | Activated Chemokine | -0.3972114 | 0.039 | 0.113 | 3.358229e-18 | 14 |
| 2.173517e-22 | SESN3    | Activated Chemokine | -0.4547697 | 0.063 | 0.161 | 3.875164e-18 | 14 |
| 2.422782e-22 | KIAA0040 | Activated Chemokine | -0.437542  | 0.948 | 0.937 | 4.319578e-18 | 14 |
| 3.18642e-22  | EEF2     | Activated Chemokine | -0.5100441 | 0.112 | 0.205 | 5.681068e-18 | 14 |
| 4.241842e-22 | IRF1     | Activated Chemokine | 0.301256   | 0.327 | 0.164 | 7.56278e-18  | 14 |
| 4.264189e-22 | TNIP2    | Activated Chemokine | -0.3829021 | 0.057 | 0.149 | 7.602623e-18 | 14 |
| 5.320008e-22 | SEC14L1  | Activated Chemokine | -0.515894  | 0.288 | 0.394 | 9.485042e-18 | 14 |
| 6.000448e-22 | SH3BGRL  | Activated Chemokine | -0.4774957 | 0.117 | 0.207 | 1.06982e-17  | 14 |
| 6.090322e-22 | RALGPS2  | Activated Chemokine | -0.4684688 | 0.136 | 0.212 | 1.085843e-17 | 14 |
| 8.324601e-22 | MGST3    | Activated Chemokine | -0.5584874 | 0.503 | 0.572 | 1.484193e-17 | 14 |

|              |          |                     |            |       |       |              |    |
|--------------|----------|---------------------|------------|-------|-------|--------------|----|
| 9.956086e-22 | SNX2     | Activated Chemokine | 0.3073695  | 0.536 | 0.351 | 1.775071e-17 | 14 |
| 1.035229e-21 | SQLE     | Activated Chemokine | -0.4340927 | 0.043 | 0.123 | 1.84571e-17  | 14 |
| 1.359693e-21 | LPP      | Activated Chemokine | -0.3565195 | 0.054 | 0.142 | 2.424196e-17 | 14 |
| 3.407524e-21 | COR01B   | Activated Chemokine | -0.4916321 | 0.219 | 0.316 | 6.075274e-17 | 14 |
| 8.841423e-21 | SPI1     | Activated Chemokine | -0.6929245 | 0.538 | 0.589 | 1.576337e-16 | 14 |
| 1.303302e-20 | MARCKSL1 | Activated Chemokine | -0.3127044 | 0.04  | 0.126 | 2.323657e-16 | 14 |
| 1.329195e-20 | SPATS2   | Activated Chemokine | -0.3518876 | 0.061 | 0.148 | 2.369822e-16 | 14 |
| 1.902022e-20 | P2RY8    | Activated Chemokine | -0.3437535 | 0.062 | 0.149 | 3.391115e-16 | 14 |
| 2.805376e-20 | ANKRD13A | Activated Chemokine | -0.463982  | 0.149 | 0.244 | 5.001704e-16 | 14 |
| 2.971107e-20 | ARHGAP45 | Activated Chemokine | -0.4727212 | 0.322 | 0.425 | 5.297186e-16 | 14 |
| 3.336257e-20 | ECH1     | Activated Chemokine | -0.4922599 | 0.203 | 0.3   | 5.948212e-16 | 14 |
| 3.698449e-20 | BLK      | Activated Chemokine | -0.5510355 | 0.564 | 0.621 | 6.593965e-16 | 14 |
| 4.56525e-20  | IFI16    | Activated Chemokine | -0.4368011 | 0.124 | 0.214 | 8.139385e-16 | 14 |
| 4.85432e-20  | WASHC4   | Activated Chemokine | -0.5386151 | 0.149 | 0.247 | 8.654768e-16 | 14 |
| 4.921144e-20 | RASGRP2  | Activated Chemokine | 0.3436034  | 0.486 | 0.334 | 8.773908e-16 | 14 |
| 5.446544e-20 | IER2     | Activated Chemokine | 0.3433952  | 0.306 | 0.16  | 9.710644e-16 | 14 |
| 5.555985e-20 | MARCKS   | Activated Chemokine | -0.4837122 | 0.183 | 0.285 | 9.905765e-16 | 14 |
| 1.015408e-19 | LAT2     | Activated Chemokine | -0.5255551 | 0.366 | 0.428 | 1.810372e-15 | 14 |
| 1.268373e-19 | PLP2     | Activated Chemokine | -0.4330978 | 0.117 | 0.211 | 2.261382e-15 | 14 |
| 1.329442e-19 | MIS18BP1 | Activated Chemokine | -0.4197994 | 0.068 | 0.171 | 2.370262e-15 | 14 |
| 3.512005e-19 | CCDC88A  | Activated Chemokine | -0.5096988 | 0.461 | 0.532 | 6.261553e-15 | 14 |
| 3.924797e-19 | PAIP2    | Activated Chemokine | -0.4756657 | 0.254 | 0.338 | 6.99752e-15  | 14 |
| 4.506286e-19 | SEPHS2   | Activated Chemokine | -0.3114439 | 0.037 | 0.105 | 8.034257e-15 | 14 |
| 4.723272e-19 | TRIM8    | Activated Chemokine | -0.3369023 | 0.031 | 0.1   | 8.421122e-15 | 14 |
| 4.848394e-19 | MX1      | Activated Chemokine | -0.3787038 | 0.068 | 0.143 | 8.644202e-15 | 14 |

|              |          |                     |            |       |       |              |    |
|--------------|----------|---------------------|------------|-------|-------|--------------|----|
| 5.841287e-19 | MY01G    | Activated Chemokine | -0.4229337 | 0.115 | 0.209 | 1.041443e-14 | 14 |
| 1.027729e-18 | CAT      | Activated Chemokine | -0.4347413 | 0.117 | 0.204 | 1.832339e-14 | 14 |
| 1.050652e-18 | BIN1     | Activated Chemokine | -0.4735973 | 0.235 | 0.333 | 1.873207e-14 | 14 |
| 1.074188e-18 | TSP0     | Activated Chemokine | -0.4835077 | 0.242 | 0.331 | 1.91517e-14  | 14 |
| 1.230433e-18 | CCNDBP1  | Activated Chemokine | -0.4818767 | 0.187 | 0.277 | 2.19374e-14  | 14 |
| 1.383706e-18 | TNRC6B   | Activated Chemokine | -0.4287397 | 0.107 | 0.213 | 2.467009e-14 | 14 |
| 1.657145e-18 | ADA      | Activated Chemokine | -0.4269181 | 0.163 | 0.248 | 2.954524e-14 | 14 |
| 3.122169e-18 | TPM4     | Activated Chemokine | -0.4306152 | 0.143 | 0.236 | 5.566514e-14 | 14 |
| 3.82814e-18  | CPNE3    | Activated Chemokine | -0.3412016 | 0.039 | 0.115 | 6.825191e-14 | 14 |
| 4.048481e-18 | TNFRSF17 | Activated Chemokine | -0.4870614 | 0.19  | 0.281 | 7.218037e-14 | 14 |
| 5.585724e-18 | RNASET2  | Activated Chemokine | -0.5657053 | 0.247 | 0.334 | 9.958787e-14 | 14 |
| 5.990515e-18 | RIP0R2   | Activated Chemokine | -0.9184258 | 0.672 | 0.655 | 1.068049e-13 | 14 |
| 6.276192e-18 | TCL1A    | Activated Chemokine | -0.3951749 | 0.104 | 0.185 | 1.118982e-13 | 14 |
| 6.510598e-18 | INPP5D   | Activated Chemokine | -0.3247062 | 0.039 | 0.109 | 1.160775e-13 | 14 |
| 7.318759e-18 | FLI1     | Activated Chemokine | -0.3613091 | 0.058 | 0.119 | 1.304862e-13 | 14 |
| 8.548432e-18 | FCGR2B   | Activated Chemokine | -0.3944103 | 0.119 | 0.211 | 1.5241e-13   | 14 |
| 9.578733e-18 | TCEAL8   | Activated Chemokine | -0.3921461 | 0.918 | 0.917 | 1.707792e-13 | 14 |
| 9.995073e-18 | PFDN5    | Activated Chemokine | -0.3075129 | 0.036 | 0.106 | 1.782022e-13 | 14 |
| 1.278375e-17 | SORL1    | Activated Chemokine | -0.3810247 | 0.067 | 0.142 | 2.279216e-13 | 14 |
| 1.651371e-17 | ADD3     | Activated Chemokine | -0.3574729 | 0.072 | 0.149 | 2.944228e-13 | 14 |
| 2.1218e-17   | SPSB3    | Activated Chemokine | -0.4889486 | 0.249 | 0.336 | 3.782957e-13 | 14 |
| 2.182772e-17 | FAM96A   | Activated Chemokine | -0.3812832 | 0.07  | 0.135 | 3.891665e-13 | 14 |
| 2.456856e-17 | ODF2L    | Activated Chemokine | -0.3373678 | 0.051 | 0.132 | 4.380329e-13 | 14 |
| 2.635712e-17 | STIM2    | Activated Chemokine | -0.3818469 | 0.092 | 0.168 | 4.69921e-13  | 14 |
| 2.649872e-17 | DOCK8    | Activated Chemokine | -1.469267  | 0.939 | 0.926 | 4.724457e-13 | 14 |

|              |                     |       |       |              |    |  |
|--------------|---------------------|-------|-------|--------------|----|--|
| IGKC         | Activated Chemokine |       |       |              |    |  |
| 2.931341e-17 | -0.3735113          | 0.078 | 0.147 | 5.226288e-13 | 14 |  |
| COBLL1       | Activated Chemokine |       |       |              |    |  |
| 3.425601e-17 | -0.5096707          | 0.569 | 0.616 | 6.107505e-13 | 14 |  |
| PNISR        | Activated Chemokine |       |       |              |    |  |
| 5.335828e-17 | -0.3146525          | 0.055 | 0.129 | 9.513248e-13 | 14 |  |
| SASH3        | Activated Chemokine |       |       |              |    |  |
| 5.817449e-17 | -0.3506703          | 0.055 | 0.129 | 1.037193e-12 | 14 |  |
| CCNG2        | Activated Chemokine |       |       |              |    |  |
| 6.020674e-17 | -0.4130286          | 0.085 | 0.149 | 1.073426e-12 | 14 |  |
| ARRDC2       | Activated Chemokine |       |       |              |    |  |
| 7.010272e-17 | -0.5052227          | 0.345 | 0.408 | 1.249861e-12 | 14 |  |
| LSM10        | Activated Chemokine |       |       |              |    |  |
| 7.558472e-17 | -0.3699837          | 0.088 | 0.166 | 1.3476e-12   | 14 |  |
| PPP1R18      | Activated Chemokine |       |       |              |    |  |
| 9.843706e-17 | -0.3557677          | 0.063 | 0.124 | 1.755034e-12 | 14 |  |
| DDAH2        | Activated Chemokine |       |       |              |    |  |
| 1.364247e-16 | -0.3241556          | 0.072 | 0.155 | 2.432316e-12 | 14 |  |
| MYL6B        | Activated Chemokine |       |       |              |    |  |
| 1.414713e-16 | -0.4816731          | 0.222 | 0.301 | 2.522291e-12 | 14 |  |
| ITSN2        | Activated Chemokine |       |       |              |    |  |
| 1.829285e-16 | -0.5257883          | 0.146 | 0.213 | 3.261432e-12 | 14 |  |
| LBH          | Activated Chemokine |       |       |              |    |  |
| 1.911002e-16 | 0.3650644           | 0.756 | 0.65  | 3.407125e-12 | 14 |  |
| HLA-DQA1     | Activated Chemokine |       |       |              |    |  |
| 2.168459e-16 | -0.4243814          | 0.287 | 0.365 | 3.866145e-12 | 14 |  |
| TMEM256      | Activated Chemokine |       |       |              |    |  |
| 2.190596e-16 | -0.3701909          | 0.092 | 0.179 | 3.905614e-12 | 14 |  |
| SYK          | Activated Chemokine |       |       |              |    |  |
| 3.990606e-16 | -0.3503845          | 0.052 | 0.119 | 7.114852e-12 | 14 |  |
| SAMD9        | Activated Chemokine |       |       |              |    |  |
| 4.764674e-16 | -0.455674           | 0.117 | 0.196 | 8.494938e-12 | 14 |  |
| FAM129C      | Activated Chemokine |       |       |              |    |  |
| 5.191624e-16 | -0.3599098          | 0.064 | 0.136 | 9.256146e-12 | 14 |  |
| PLEKHA2      | Activated Chemokine |       |       |              |    |  |
| 5.867918e-16 | -0.3045299          | 0.059 | 0.137 | 1.046191e-11 | 14 |  |
| MPST         | Activated Chemokine |       |       |              |    |  |
| 6.945164e-16 | -0.3064699          | 0.057 | 0.123 | 1.238253e-11 | 14 |  |
| ING4         | Activated Chemokine |       |       |              |    |  |
| 1.083906e-15 | -0.4937552          | 0.457 | 0.495 | 1.932497e-11 | 14 |  |
| FXVD5        | Activated Chemokine |       |       |              |    |  |
| 1.099737e-15 | -0.4420935          | 0.304 | 0.379 | 1.960721e-11 | 14 |  |
| ZFAND6       | Activated Chemokine |       |       |              |    |  |
| 1.114201e-15 | -0.500486           | 0.514 | 0.558 | 1.986509e-11 | 14 |  |
| ATP5IF1      | Activated Chemokine |       |       |              |    |  |
| 1.186444e-15 | -0.6034428          | 0.552 | 0.571 | 2.11531e-11  | 14 |  |
| VIM          | Activated Chemokine |       |       |              |    |  |
| 1.479083e-15 | -0.3081367          | 0.05  | 0.111 | 2.637056e-11 | 14 |  |
| LPAR5        | Activated Chemokine |       |       |              |    |  |
| 2.023934e-15 | -0.4642866          | 0.415 | 0.487 | 3.608471e-11 | 14 |  |

|              |          |                     |            |       |       |              |    |
|--------------|----------|---------------------|------------|-------|-------|--------------|----|
| 2.067401e-15 | GMFG     | Activated Chemokine | -0.3824212 | 0.051 | 0.107 | 3.685969e-11 | 14 |
| 2.199685e-15 | C1orf162 | Activated Chemokine | -0.3462139 | 0.074 | 0.142 | 3.921818e-11 | 14 |
| 2.853649e-15 | ARID4A   | Activated Chemokine | -0.3467426 | 0.105 | 0.184 | 5.08777e-11  | 14 |
| 2.90971e-15  | TLR10    | Activated Chemokine | -0.3247871 | 0.061 | 0.128 | 5.187722e-11 | 14 |
| 3.561409e-15 | ZBTB20   | Activated Chemokine | -0.4713735 | 0.306 | 0.386 | 6.349636e-11 | 14 |
| 4.052011e-15 | EVL      | Activated Chemokine | -0.4953498 | 0.298 | 0.361 | 7.22433e-11  | 14 |
| 4.240724e-15 | ARID5B   | Activated Chemokine | -0.4146152 | 0.246 | 0.332 | 7.560787e-11 | 14 |
| 5.920072e-15 | CCM2     | Activated Chemokine | -0.9305812 | 0.127 | 0.213 | 1.05549e-10  | 14 |
| 6.612575e-15 | PLCG2    | Activated Chemokine | -0.3020229 | 0.075 | 0.146 | 1.178956e-10 | 14 |
| 7.000593e-15 | FL0T1    | Activated Chemokine | -0.416181  | 0.246 | 0.322 | 1.248136e-10 | 14 |
| 7.831375e-15 | IGBP1    | Activated Chemokine | -0.3261821 | 0.115 | 0.199 | 1.396256e-10 | 14 |
| 1.127084e-14 | ETFB     | Activated Chemokine | -0.3739558 | 0.113 | 0.186 | 2.009479e-10 | 14 |
| 2.016657e-14 | APBB1IP  | Activated Chemokine | -0.3768724 | 0.174 | 0.249 | 3.595497e-10 | 14 |
| 2.392363e-14 | O STF1   | Activated Chemokine | -0.4549248 | 0.481 | 0.524 | 4.265343e-10 | 14 |
| 2.878006e-14 | TRAPPC1  | Activated Chemokine | -0.3298448 | 0.993 | 0.982 | 5.131197e-10 | 14 |
| 3.217351e-14 | MT-C03   | Activated Chemokine | -0.4369166 | 0.395 | 0.457 | 5.736215e-10 | 14 |
| 8.99706e-14  | CTSS     | Activated Chemokine | -0.3835166 | 0.159 | 0.235 | 1.604086e-09 | 14 |
| 1.080479e-13 | AKAP13   | Activated Chemokine | -0.4659158 | 0.302 | 0.367 | 1.926386e-09 | 14 |
| 1.688779e-13 | SNAP23   | Activated Chemokine | -0.3287852 | 0.073 | 0.142 | 3.010924e-09 | 14 |
| 1.871153e-13 | MKNK2    | Activated Chemokine | -0.431947  | 0.438 | 0.481 | 3.336078e-09 | 14 |
| 2.031331e-13 | ISCU     | Activated Chemokine | -0.4187494 | 0.107 | 0.171 | 3.62166e-09  | 14 |
| 2.756968e-13 | SMC4     | Activated Chemokine | -0.4051527 | 0.239 | 0.305 | 4.915398e-09 | 14 |
| 3.597892e-13 | UGP2     | Activated Chemokine | -2.136781  | 0.594 | 0.646 | 6.414682e-09 | 14 |
| 3.623047e-13 | IGLC2    | Activated Chemokine | -0.4093904 | 0.284 | 0.351 | 6.45953e-09  | 14 |
| 4.127611e-13 | DDX17    | Activated Chemokine | -0.3075918 | 0.074 | 0.143 | 7.359118e-09 | 14 |



|              |            |                     |            |       |       |              |    |
|--------------|------------|---------------------|------------|-------|-------|--------------|----|
| 4.240949e-13 | SLC43A2    | Activated Chemokine | -0.3692048 | 0.209 | 0.288 | 7.561188e-09 | 14 |
| 4.835072e-13 | GSTK1      | Activated Chemokine | -0.3859905 | 0.168 | 0.241 | 8.62045e-09  | 14 |
| 5.82851e-13  | SP140      | Activated Chemokine | -0.3698193 | 0.133 | 0.195 | 1.039165e-08 | 14 |
| 5.852591e-13 | CYTH1      | Activated Chemokine | -0.3659802 | 0.174 | 0.251 | 1.043458e-08 | 14 |
| 6.261456e-13 | PPP2R5C    | Activated Chemokine | -0.3766175 | 0.178 | 0.25  | 1.116355e-08 | 14 |
| 6.424309e-13 | SNRPN      | Activated Chemokine | -0.4591574 | 0.445 | 0.493 | 1.14539e-08  | 14 |
| 7.820152e-13 | RAC2       | Activated Chemokine | -0.3335176 | 0.092 | 0.143 | 1.394255e-08 | 14 |
| 9.684029e-13 | NUB1       | Activated Chemokine | -0.4661052 | 0.152 | 0.207 | 1.726565e-08 | 14 |
| 1.056785e-12 | PRKCB      | Activated Chemokine | -0.3241411 | 0.067 | 0.124 | 1.884143e-08 | 14 |
| 1.124221e-12 | RNF213     | Activated Chemokine | -0.3508123 | 0.153 | 0.213 | 2.004374e-08 | 14 |
| 1.16764e-12  | IDS        | Activated Chemokine | -0.3461183 | 0.161 | 0.228 | 2.081785e-08 | 14 |
| 1.226829e-12 | ALKBH7     | Activated Chemokine | -0.5256649 | 0.142 | 0.21  | 2.187314e-08 | 14 |
| 1.294805e-12 | FOS        | Activated Chemokine | -0.4002869 | 0.066 | 0.124 | 2.308508e-08 | 14 |
| 1.538299e-12 | AL139020.1 | Activated Chemokine | -0.4029464 | 0.402 | 0.454 | 2.742632e-08 | 14 |
| 1.629732e-12 | TMEM59     | Activated Chemokine | -0.5339692 | 0.185 | 0.236 | 2.905648e-08 | 14 |
| 1.703151e-12 | UBE2J1     | Activated Chemokine | -0.3855759 | 0.147 | 0.209 | 3.036548e-08 | 14 |
| 2.998702e-12 | SNHG25     | Activated Chemokine | -0.4223158 | 0.173 | 0.242 | 5.346386e-08 | 14 |
| 4.004658e-12 | RGS1       | Activated Chemokine | 0.3001035  | 0.27  | 0.158 | 7.139904e-08 | 14 |
| 4.896679e-12 | DDIT4      | Activated Chemokine | -0.392344  | 0.172 | 0.238 | 8.730289e-08 | 14 |
| 5.50417e-12  | DSTN       | Activated Chemokine | -0.4024561 | 0.261 | 0.326 | 9.813385e-08 | 14 |
| 6.335195e-12 | BLNK       | Activated Chemokine | -0.4192643 | 0.243 | 0.29  | 1.129502e-07 | 14 |
| 7.918673e-12 | C7orf50    | Activated Chemokine | -0.3541805 | 0.148 | 0.208 | 1.41182e-07  | 14 |
| 8.748073e-12 | ARHGEF1    | Activated Chemokine | -0.4120546 | 0.267 | 0.321 | 1.559694e-07 | 14 |
| 1.342532e-11 | LTA4H      | Activated Chemokine | -0.3183975 | 0.129 | 0.191 | 2.393601e-07 | 14 |
| 1.635896e-11 | MAP2K1     | Activated Chemokine | -0.4233857 | 0.485 | 0.516 | 2.916639e-07 | 14 |

|              |                     |       |       |              |    |  |
|--------------|---------------------|-------|-------|--------------|----|--|
| VAMP2        | Activated Chemokine |       |       |              |    |  |
| 1.718244e-11 | -0.3294651          | 0.106 | 0.167 | 3.063457e-07 | 14 |  |
| DEF8         | Activated Chemokine |       |       |              |    |  |
| 2.003621e-11 | -0.3433913          | 0.062 | 0.11  | 3.572255e-07 | 14 |  |
| LINC02397    | Activated Chemokine |       |       |              |    |  |
| 4.584402e-11 | -0.3859156          | 0.2   | 0.245 | 8.17353e-07  | 14 |  |
| GCC2         | Activated Chemokine |       |       |              |    |  |
| 5.610266e-11 | -0.3480391          | 0.119 | 0.17  | 1.000254e-06 | 14 |  |
| TMEM154      | Activated Chemokine |       |       |              |    |  |
| 5.966686e-11 | -0.4113703          | 0.249 | 0.315 | 1.0638e-06   | 14 |  |
| HMG3         | Activated Chemokine |       |       |              |    |  |
| 9.955372e-11 | -0.3963635          | 0.441 | 0.483 | 1.774943e-06 | 14 |  |
| RABAC1       | Activated Chemokine |       |       |              |    |  |
| 1.183578e-10 | -0.4518924          | 0.71  | 0.699 | 2.110201e-06 | 14 |  |
| CCNI         | Activated Chemokine |       |       |              |    |  |
| 1.247268e-10 | -0.3263199          | 0.147 | 0.208 | 2.223754e-06 | 14 |  |
| IKZF3        | Activated Chemokine |       |       |              |    |  |
| 1.251198e-10 | -0.4105256          | 0.7   | 0.687 | 2.23076e-06  | 14 |  |
| PPP1CA       | Activated Chemokine |       |       |              |    |  |
| 1.441709e-10 | -0.3230171          | 0.285 | 0.343 | 2.570423e-06 | 14 |  |
| PKIG         | Activated Chemokine |       |       |              |    |  |
| 1.559025e-10 | -0.370654           | 0.182 | 0.227 | 2.779586e-06 | 14 |  |
| MCM5         | Activated Chemokine |       |       |              |    |  |
| 1.61576e-10  | -0.3478872          | 0.182 | 0.242 | 2.880739e-06 | 14 |  |
| DRAM2        | Activated Chemokine |       |       |              |    |  |
| 1.696911e-10 | -0.3282786          | 0.16  | 0.225 | 3.025422e-06 | 14 |  |
| PHIP         | Activated Chemokine |       |       |              |    |  |
| 2.381127e-10 | -0.3684666          | 0.233 | 0.29  | 4.245311e-06 | 14 |  |
| AKAP9        | Activated Chemokine |       |       |              |    |  |
| 2.733129e-10 | -0.4024821          | 0.349 | 0.388 | 4.872896e-06 | 14 |  |
| PSAP         | Activated Chemokine |       |       |              |    |  |
| 2.76209e-10  | -0.3039259          | 0.158 | 0.22  | 4.92453e-06  | 14 |  |
| GNAI2        | Activated Chemokine |       |       |              |    |  |
| 2.883791e-10 | -0.3370871          | 0.187 | 0.248 | 5.14151e-06  | 14 |  |
| PSMB8-AS1    | Activated Chemokine |       |       |              |    |  |
| 3.67106e-10  | -0.3958494          | 0.139 | 0.193 | 6.545133e-06 | 14 |  |
| FAM30A       | Activated Chemokine |       |       |              |    |  |
| 3.848836e-10 | -0.4456837          | 0.334 | 0.351 | 6.86209e-06  | 14 |  |
| LY6E         | Activated Chemokine |       |       |              |    |  |
| 5.075686e-10 | -0.4596116          | 0.468 | 0.493 | 9.04944e-06  | 14 |  |
| C4orf3       | Activated Chemokine |       |       |              |    |  |
| 5.155901e-10 | -0.3579446          | 0.215 | 0.271 | 9.192456e-06 | 14 |  |
| SEPT9        | Activated Chemokine |       |       |              |    |  |
| 7.135724e-10 | -0.3269878          | 0.156 | 0.206 | 1.272228e-05 | 14 |  |
| OGA          | Activated Chemokine |       |       |              |    |  |
| 7.256147e-10 | -0.3189257          | 0.118 | 0.174 | 1.293698e-05 | 14 |  |
| CDK13        | Activated Chemokine |       |       |              |    |  |
| 1.041156e-09 | -0.3639713          | 0.157 | 0.196 | 1.856277e-05 | 14 |  |
| CLEC2B       | Activated Chemokine |       |       |              |    |  |
| 1.088061e-09 | -0.3605409          | 0.216 | 0.269 | 1.939903e-05 | 14 |  |

|              |          |                     |            |       |       |              |    |
|--------------|----------|---------------------|------------|-------|-------|--------------|----|
| 1.319297e-09 | MBNL1    | Activated Chemokine | -0.3006529 | 0.051 | 0.112 | 2.352174e-05 | 14 |
| 1.55598e-09  | CD9      | Activated Chemokine | -0.3327877 | 0.229 | 0.287 | 2.774157e-05 | 14 |
| 1.825068e-09 | ATF6B    | Activated Chemokine | -0.3293986 | 0.139 | 0.191 | 3.253913e-05 | 14 |
| 2.099591e-09 | LBR      | Activated Chemokine | -0.3295326 | 0.136 | 0.186 | 3.743361e-05 | 14 |
| 2.670033e-09 | ANKRD44  | Activated Chemokine | -0.3287234 | 0.185 | 0.241 | 4.760401e-05 | 14 |
| 4.833213e-09 | PTRHD1   | Activated Chemokine | -0.3639448 | 0.287 | 0.333 | 8.617136e-05 | 14 |
| 5.081736e-09 | BPTF     | Activated Chemokine | -0.3455359 | 0.378 | 0.421 | 9.060227e-05 | 14 |
| 5.320009e-09 | KMT2E    | Activated Chemokine | -0.3041669 | 0.193 | 0.246 | 9.485043e-05 | 14 |
| 7.051555e-09 | TMEM134  | Activated Chemokine | -0.3319966 | 0.171 | 0.228 | 0.0001257222 | 14 |
| 9.229413e-09 | UBE2G1   | Activated Chemokine | -0.3174028 | 0.172 | 0.212 | 0.0001645512 | 14 |
| 1.003289e-08 | FMNL1    | Activated Chemokine | -0.3166175 | 0.148 | 0.193 | 0.0001788765 | 14 |
| 1.226474e-08 | ARID1B   | Activated Chemokine | -0.3006409 | 0.116 | 0.156 | 0.0002186681 | 14 |
| 1.260571e-08 | LMBRD1   | Activated Chemokine | -0.3390854 | 0.795 | 0.77  | 0.0002247473 | 14 |
| 1.300645e-08 | SEC62    | Activated Chemokine | -0.3268716 | 0.351 | 0.389 | 0.000231892  | 14 |
| 1.309221e-08 | CUTA     | Activated Chemokine | -0.3256236 | 0.181 | 0.223 | 0.000233421  | 14 |
| 1.335737e-08 | GCA      | Activated Chemokine | -1.499105  | 0.432 | 0.429 | 0.0002381485 | 14 |
| 1.412795e-08 | IGLC3    | Activated Chemokine | -0.3007991 | 0.181 | 0.225 | 0.0002518872 | 14 |
| 1.437832e-08 | MAGED2   | Activated Chemokine | -0.3345255 | 0.139 | 0.187 | 0.000256351  | 14 |
| 1.60603e-08  | CDCA7L   | Activated Chemokine | -0.3311504 | 0.858 | 0.83  | 0.0002863391 | 14 |
| 2.073015e-08 | UQCRB    | Activated Chemokine | -0.302015  | 0.163 | 0.209 | 0.0003695978 | 14 |
| 2.580107e-08 | ARHGAP30 | Activated Chemokine | -0.327713  | 0.264 | 0.307 | 0.0004600074 | 14 |
| 2.94396e-08  | EAPP     | Activated Chemokine | -0.3060941 | 0.192 | 0.234 | 0.0005248785 | 14 |
| 3.047898e-08 | SPINT2   | Activated Chemokine | -0.4402466 | 0.348 | 0.376 | 0.0005434098 | 14 |
| 3.302086e-08 | ACADM    | Activated Chemokine | -0.3359681 | 0.225 | 0.264 | 0.0005887289 | 14 |
| 4.627082e-08 | TTC3     | Activated Chemokine | -0.3199352 | 0.279 | 0.321 | 0.0008249624 | 14 |

|              |          |                     |            |       |       |              |    |
|--------------|----------|---------------------|------------|-------|-------|--------------|----|
| 4.631169e-08 | TUBA1A   | Activated Chemokine | -0.3235486 | 0.159 | 0.2   | 0.0008256911 | 14 |
| 4.796127e-08 | CLK1     | Activated Chemokine | -0.3040913 | 0.18  | 0.225 | 0.0008551014 | 14 |
| 4.852798e-08 | JMJD1C   | Activated Chemokine | -0.4859249 | 0.973 | 0.932 | 0.0008652054 | 14 |
| 5.232826e-08 | SERF2    | Activated Chemokine | -0.3612119 | 0.333 | 0.362 | 0.0009329606 | 14 |
| 5.275849e-08 | ANXA6    | Activated Chemokine | -0.3229155 | 0.235 | 0.278 | 0.0009406312 | 14 |
| 5.555574e-08 | TANK     | Activated Chemokine | -0.3046693 | 0.197 | 0.248 | 0.0009905033 | 14 |
| 5.885616e-08 | CSK      | Activated Chemokine | -0.3619248 | 0.248 | 0.281 | 0.001049347  | 14 |
| 6.490995e-08 | SMCHD1   | Activated Chemokine | -0.3331633 | 0.29  | 0.337 | 0.00115728   | 14 |
| 6.723916e-08 | S100A11  | Activated Chemokine | -0.3681041 | 0.576 | 0.586 | 0.001198807  | 14 |
| 7.304456e-08 | NDUFV2   | Activated Chemokine | -0.3849892 | 0.251 | 0.289 | 0.001302311  | 14 |
| 8.21276e-08  | RUBCNL   | Activated Chemokine | -0.3441914 | 0.513 | 0.525 | 0.001464253  | 14 |
| 9.278577e-08 | SYF2     | Activated Chemokine | -0.3553429 | 0.107 | 0.144 | 0.001654278  | 14 |
| 9.450957e-08 | DUSP1    | Activated Chemokine | -0.3512835 | 0.46  | 0.477 | 0.001685011  | 14 |
| 1.046596e-07 | SSR2     | Activated Chemokine | -0.3070483 | 0.166 | 0.204 | 0.001865977  | 14 |
| 1.247972e-07 | IFNGR2   | Activated Chemokine | -0.3489657 | 0.265 | 0.292 | 0.002225009  | 14 |
| 1.311265e-07 | YWHAH    | Activated Chemokine | -0.3591976 | 0.22  | 0.265 | 0.002337854  | 14 |
| 2.345529e-07 | CD22     | Activated Chemokine | -1.326667  | 0.427 | 0.422 | 0.004181844  | 14 |
| 2.576654e-07 | HIST1H4C | Activated Chemokine | -0.3563918 | 0.909 | 0.868 | 0.004593917  | 14 |
| 2.606607e-07 | ARPC3    | Activated Chemokine | -0.3314718 | 0.228 | 0.261 | 0.00464732   | 14 |
| 2.869231e-07 | MAT2B    | Activated Chemokine | -0.3388763 | 0.368 | 0.384 | 0.005115552  | 14 |
| 3.020386e-07 | LAPTM4A  | Activated Chemokine | -2.205244  | 0.076 | 0.127 | 0.005385046  | 14 |
| 4.204982e-07 | IGHG2    | Activated Chemokine | -0.3013331 | 0.207 | 0.247 | 0.007497062  | 14 |
| 6.974759e-07 | NBDY     | Activated Chemokine | -0.3505495 | 0.461 | 0.476 | 0.0124353    | 14 |
| 7.676282e-07 | N4BP2L2  | Activated Chemokine | -0.3370961 | 0.397 | 0.415 | 0.01368604   | 14 |
| 8.061382e-07 | HDAC1    | Activated Chemokine | -0.3193574 | 0.283 | 0.314 | 0.01437264   | 14 |

|               |                     |       |       |               |    |     |        |  |        |
|---------------|---------------------|-------|-------|---------------|----|-----|--------|--|--------|
| ATP2B1        | Activated Chemokine |       |       |               |    |     |        |  |        |
| 1.213453e-06  | -0.3042698          | 0.175 | 0.219 | 0.02163466    |    |     |        |  | 14     |
| ISG15         | Activated Chemokine |       |       |               |    |     |        |  |        |
| 1.431493e-06  | -0.4024395          | 0.613 | 0.576 | 0.02552209    |    |     |        |  | 14     |
| SARAF         | Activated Chemokine |       |       |               |    |     |        |  |        |
| 1.818966e-06  | -0.4260714          | 0.348 | 0.36  | 0.03243035    |    |     |        |  | 14     |
| H2AFV         | Activated Chemokine |       |       |               |    |     |        |  |        |
| 1.8679e-06    | -0.3925766          | 0.221 | 0.238 | 0.0333028     |    |     |        |  | 14     |
| CD55          | Activated Chemokine |       |       |               |    |     |        |  |        |
| 2.317497e-06  | -0.3666238          | 0.343 | 0.361 | 0.04131866    |    |     |        |  | 14     |
| TPD52         | Activated Chemokine |       |       |               |    |     |        |  |        |
| 3.684747e-06  | -0.3321725          | 0.636 | 0.613 | 0.06569536    |    |     |        |  | 14     |
| ARPC5         | Activated Chemokine |       |       |               |    |     |        |  |        |
| 4.255155e-06  | -0.3188221          | 0.361 | 0.384 | 0.07586515    |    |     |        |  | 14     |
| JAK1          | Activated Chemokine |       |       |               |    |     |        |  |        |
| 5.607118e-06  | -0.3158228          | 0.324 | 0.344 | 0.0999693     |    |     |        |  | 14     |
| ATRX          | Activated Chemokine |       |       |               |    |     |        |  |        |
| 6.185502e-06  | -0.8127835          | 0.973 | 0.905 | 0.1102813     |    |     |        |  | 14     |
| IGHM          | Activated Chemokine |       |       |               |    |     |        |  |        |
| 1.615012e-05  | -0.3221084          | 0.364 | 0.375 | 0.2879405     |    |     |        |  | 14     |
| PTP4A2        | Activated Chemokine |       |       |               |    |     |        |  |        |
| 2.293452e-05  | -0.3057127          | 0.313 | 0.336 | 0.4088995     |    |     |        |  | 14     |
| POLR2J3.1     | Activated Chemokine |       |       |               |    |     |        |  |        |
| 4.768299e-05  | -0.3041             | 0.574 | 0.559 | 0.8501401     |    |     |        |  | 14     |
| YWHAZ         | Activated Chemokine |       |       |               |    |     |        |  |        |
| 0.0002533444  | -0.3065477          | 0.357 | 0.397 | 1             |    |     |        |  | 14     |
| CSTB          | Activated Chemokine |       |       |               |    |     |        |  |        |
| 0.0003151073  | -0.310699           | 0.774 | 0.719 | 1             |    |     |        |  | 14     |
| EIF3F         | Activated Chemokine |       |       |               |    |     |        |  |        |
| 0.000445521   | -0.3467786          | 0.259 | 0.268 | 1             |    |     |        |  | 14 JUN |
|               | Activated Chemokine |       |       |               |    |     |        |  |        |
| 0.0007003605  | -1.838351           | 0.255 | 0.243 | 1             |    |     |        |  | 14     |
| IGHG4         | Activated Chemokine |       |       |               |    |     |        |  |        |
| 0.001396689   | -0.4705575          | 0.672 | 0.604 | 1             |    |     |        |  | 14     |
| IGHD          | Activated Chemokine |       |       |               |    |     |        |  |        |
| 0.002801876   | -0.3295761          | 0.721 | 0.676 | 1             |    |     |        |  | 14     |
| TAGLN2        | Activated Chemokine |       |       |               |    |     |        |  |        |
| 0             | 1.634599            | 0.951 | 0.561 | 0             | 15 | VIM | Memory |  |        |
| LGALS3        |                     |       |       |               |    |     |        |  |        |
| 9.095223e-309 | 1.748763            | 0.647 | 0.147 | 1.621587e-304 |    |     |        |  | 15     |
| LMNA          | Memory LGALS3       |       |       |               |    |     |        |  |        |
| 5.557212e-306 | 1.927627            | 0.547 | 0.115 | 9.907953e-302 |    |     |        |  | 15     |
| LGALS3        | Memory LGALS3       |       |       |               |    |     |        |  |        |
| 4.387345e-294 | -2.194833           | 0.6   | 0.914 | 7.822198e-290 |    |     |        |  | 15     |
| IGHM          | Memory LGALS3       |       |       |               |    |     |        |  |        |
| 2.026863e-290 | -2.471041           | 0.16  | 0.667 | 3.613693e-286 |    |     |        |  | 15     |
| TCL1A         | Memory LGALS3       |       |       |               |    |     |        |  |        |
| 3.228636e-273 | 1.464055            | 0.851 | 0.398 | 5.756335e-269 |    |     |        |  | 15 TXN |
|               | Memory LGALS3       |       |       |               |    |     |        |  |        |
| 7.400816e-266 | 1.24134             | 0.913 | 0.646 | 1.319491e-261 |    |     |        |  | 15     |

|               |          |           |        |       |               |               |    |
|---------------|----------|-----------|--------|-------|---------------|---------------|----|
| HLA-DQA1      | Memory   | LGALS3    |        |       |               |               |    |
| 2.130993e-225 |          | 1.217198  | 0.834  | 0.435 | 3.799348e-221 | 15            |    |
| ANXA2         | Memory   | LGALS3    |        |       |               |               |    |
| 6.340537e-213 |          | 0.9142659 |        | 0.976 | 0.756         | 1.130454e-208 | 15 |
|               | PKM      | Memory    | LGALS3 |       |               |               |    |
| 2.488218e-206 |          | 1.303382  | 0.493  | 0.123 | 4.436244e-202 | 15            |    |
| CYT0R         | Memory   | LGALS3    |        |       |               |               |    |
| 8.405913e-196 |          | 0.6655973 |        | 0.991 | 0.903         | 1.49869e-191  | 15 |
|               | HLA-A    | Memory    | LGALS3 |       |               |               |    |
| 1.135094e-187 |          | -1.357319 |        | 0.606 | 0.872         | 2.023759e-183 | 15 |
|               | CD79A    | Memory    | LGALS3 |       |               |               |    |
| 4.597563e-187 |          | 0.4791063 |        | 1     | 0.998         | 8.196995e-183 | 15 |
|               | B2M      | Memory    | LGALS3 |       |               |               |    |
| 3.639257e-185 |          | -1.628796 |        | 0.212 | 0.616         | 6.488432e-181 | 15 |
|               | IGHD     | Memory    | LGALS3 |       |               |               |    |
| 8.141396e-184 |          | 0.9685036 |        | 0.956 | 0.709         | 1.451529e-179 | 15 |
|               | EN01     | Memory    | LGALS3 |       |               |               |    |
| 1.044774e-179 |          | 0.85772   | 0.969  | 0.789 | 1.862728e-175 | 15            |    |
| HLA-E         | Memory   | LGALS3    |        |       |               |               |    |
| 4.079095e-174 |          | 1.094891  | 0.671  | 0.238 | 7.272618e-170 | 15            |    |
| TNFRSF13B     | Memory   | LGALS3    |        |       |               |               |    |
| 4.062543e-171 |          | -1.488254 |        | 0.623 | 0.862         | 7.243108e-167 | 15 |
|               | CD79B    | Memory    | LGALS3 |       |               |               |    |
| 1.469458e-166 |          | 0.9274189 |        | 0.256 | 0.023         | 2.619897e-162 | 15 |
|               | ZBTB32   | Memory    | LGALS3 |       |               |               |    |
| 5.559114e-165 |          | 0.47709   | 1      | 0.986 | 9.911344e-161 | 15            |    |
| HLA-B         | Memory   | LGALS3    |        |       |               |               |    |
| 7.07138e-163  |          | 0.7666456 |        | 0.991 | 0.945         | 1.260756e-158 | 15 |
|               | HLA-DRA  | Memory    | LGALS3 |       |               |               |    |
| 3.556369e-144 |          | 0.9282642 |        | 0.389 | 0.068         | 6.340651e-140 | 15 |
|               | CAPN2    | Memory    | LGALS3 |       |               |               |    |
| 6.055615e-140 |          | 1.015289  | 0.492  | 0.155 | 1.079656e-135 | 15            |    |
| CD58          | Memory   | LGALS3    |        |       |               |               |    |
| 1.138296e-136 |          | 1.151417  | 0.818  | 0.456 | 2.029469e-132 | 15            |    |
| S100A6        | Memory   | LGALS3    |        |       |               |               |    |
| 1.97133e-131  |          | 0.9268743 |        | 0.89  | 0.692         | 3.514684e-127 | 15 |
|               | HLA-DQB1 | Memory    | LGALS3 |       |               |               |    |
| 5.603276e-129 |          | 0.7554587 |        | 0.947 | 0.692         | 9.990081e-125 | 15 |
|               | EMP3     | Memory    | LGALS3 |       |               |               |    |
| 2.744343e-124 |          | 0.7632377 |        | 0.2   | 0.024         | 4.89289e-120  | 15 |
|               | DUSP4    | Memory    | LGALS3 |       |               |               |    |
| 1.904108e-123 |          | 0.774736  | 0.96   | 0.811 | 3.394834e-119 | 15            |    |
| HLA-DPA1      | Memory   | LGALS3    |        |       |               |               |    |
| 2.191596e-113 |          | 0.6483071 |        | 0.948 | 0.77          | 3.907397e-109 | 15 |
|               | HLA-DPB1 | Memory    | LGALS3 |       |               |               |    |
| 1.317799e-111 |          | 0.595149  | 0.985  | 0.845 | 2.349503e-107 | 15            |    |
| HSP90AB1      | Memory   | LGALS3    |        |       |               |               |    |
| 4.392007e-109 |          | 0.8427489 |        | 0.848 | 0.536         | 7.830509e-105 | 15 |
|               | CCR7     | Memory    | LGALS3 |       |               |               |    |
| 1.575363e-108 |          | 0.3947827 |        | 0.878 | 0.75          | 2.808714e-104 | 15 |

|          |        |        |               |            |       |       |               |               |    |
|----------|--------|--------|---------------|------------|-------|-------|---------------|---------------|----|
| HLA-DRB1 | Memory | LGALS3 | 2.516221e-108 | 0.802632   | 0.644 | 0.328 | 4.486171e-104 | 15            |    |
| VOPP1    | Memory | LGALS3 | 7.638136e-108 | 1.003122   | 0.799 | 0.497 | 1.361803e-103 | 15            |    |
| HLA-DRB5 | Memory | LGALS3 | 1.375303e-104 | 0.6061828  |       | 0.981 | 0.886         | 2.452027e-100 | 15 |
| GAPDH    | Memory | LGALS3 | 7.051246e-104 | -1.990061  |       | 0.207 | 0.496         | 1.257167e-99  | 15 |
| LTB      | Memory | LGALS3 | 3.43325e-101  | 0.3476943  |       | 1     | 0.999         | 6.121141e-97  | 15 |
| EEF1A1   | Memory | LGALS3 | 2.84925e-96   | 0.7412881  |       | 0.306 | 0.071         | 5.079928e-92  | 15 |
| RDX      | Memory | LGALS3 | 1.159204e-94  | 0.9058913  |       | 0.656 | 0.278         | 2.066744e-90  | 15 |
| MIR155HG | Memory | LGALS3 | 2.277772e-94  | -0.9874796 |       | 0.683 | 0.851         | 4.061039e-90  | 15 |
| CD37     | Memory | LGALS3 | 1.187987e-93  | 0.7987071  |       | 0.721 | 0.396         | 2.118062e-89  | 15 |
| FABP5    | Memory | LGALS3 | 9.15948e-92   | 0.6332839  |       | 0.931 | 0.731         | 1.633044e-87  | 15 |
| HSPA8    | Memory | LGALS3 | 1.188779e-85  | 0.6861521  |       | 0.683 | 0.385         | 2.119474e-81  | 15 |
| FBNP1    | Memory | LGALS3 | 3.213636e-85  | -0.8731795 |       | 0.868 | 0.937         | 5.729592e-81  | 15 |
| BTG1     | Memory | LGALS3 | 5.621289e-83  | 0.4327576  |       | 0.986 | 0.897         | 1.00222e-78   | 15 |
| PFN1     | Memory | LGALS3 | 1.14265e-81   | 0.7380014  |       | 0.579 | 0.306         | 2.03723e-77   | 15 |
| LPXN     | Memory | LGALS3 | 1.613465e-81  | 0.5674408  |       | 0.84  | 0.57          | 2.876646e-77  | 15 |
| TUBB     | Memory | LGALS3 | 9.163109e-81  | 0.8083076  |       | 0.315 | 0.115         | 1.633691e-76  | 15 |
| NCBP3    | Memory | LGALS3 | 1.297267e-74  | 1.005723   | 0.451 | 0.191 | 2.312898e-70  | 15            |    |
| ACP5     | Memory | LGALS3 | 3.351725e-74  | 0.603646   | 0.276 | 0.074 | 5.975791e-70  | 15            |    |
| CLIP1    | Memory | LGALS3 | 9.039714e-72  | 0.7480376  |       | 0.733 | 0.456         | 1.611691e-67  | 15 |
| CD63     | Memory | LGALS3 | 1.057144e-70  | 0.5345544  |       | 0.609 | 0.312         | 1.884782e-66  | 15 |
| SEC11C   | Memory | LGALS3 | 1.16429e-70   | -1.124607  |       | 0.6   | 0.754         | 2.075812e-66  | 15 |
| CXCR4    | Memory | LGALS3 | 3.037378e-70  | 1.269988   | 0.434 | 0.2   | 5.415341e-66  | 15            |    |
| LGALS1   | Memory | LGALS3 | 4.625606e-69  | 0.4873365  |       | 0.143 | 0.019         | 8.246993e-65  | 15 |
| TFEC     | Memory | LGALS3 | 4.126055e-68  | 0.408605   | 0.993 | 0.941 | 7.356344e-64  | 15            |    |
| YBX1     | Memory | LGALS3 | 5.63714e-68   | 0.5541876  |       | 0.788 | 0.551         | 1.005046e-63  | 15 |

|              |               |               |            |       |       |              |    |
|--------------|---------------|---------------|------------|-------|-------|--------------|----|
| 1.08639e-67  | PGK1          | Memory LGALS3 | 0.3782107  | 0.129 | 0.024 | 1.936926e-63 | 15 |
| 4.533727e-67 | MIR4435-2HG   | Memory LGALS3 | 0.6673579  | 0.253 | 0.07  | 8.083182e-63 | 15 |
| 1.157434e-65 | TRAF1         | Memory LGALS3 | 0.562525   | 0.298 | 0.103 | 2.063589e-61 | 15 |
| 8.994719e-65 | CLDND1        | Memory LGALS3 | 0.6368694  | 0.585 | 0.33  | 1.603668e-60 | 15 |
| 2.32551e-63  | S100A11       | Memory LGALS3 | 0.4893552  | 0.931 | 0.747 | 4.146153e-59 | 15 |
| 3.567979e-63 | HLA-C         | Memory LGALS3 | 0.9526107  | 0.29  | 0.09  | 6.361349e-59 | 15 |
| 3.778554e-62 | KLK1          | Memory LGALS3 | 0.5691796  | 0.265 | 0.082 | 6.736784e-58 | 15 |
| 6.211914e-61 | EBI3          | Memory LGALS3 | 0.5743888  | 0.827 | 0.631 | 1.107522e-56 | 15 |
| 8.577859e-61 | GPX4          | Memory LGALS3 | 0.5897628  | 0.673 | 0.422 | 1.529346e-56 | 15 |
| 1.346107e-60 | PPP1R15A      | Memory LGALS3 | -0.8322151 | 0.416 | 0.623 | 2.399973e-56 | 15 |
| 1.095009e-59 | CLEC2D        | Memory LGALS3 | 0.5003775  | 0.887 | 0.709 | 1.952291e-55 | 15 |
| 2.685239e-59 | CLIC1         | Memory LGALS3 | 0.6049668  | 0.394 | 0.163 | 4.787513e-55 | 15 |
| 6.777598e-59 | TNIP2         | Memory LGALS3 | 0.5943827  | 0.671 | 0.376 | 1.208378e-54 | 15 |
| 1.6139e-58   | CD44          | Memory LGALS3 | -0.9856577 | 0.291 | 0.494 | 2.877422e-54 | 15 |
| 1.284898e-57 | UCP2          | Memory LGALS3 | 0.6218782  | 0.407 | 0.174 | 2.290846e-53 | 15 |
| 3.812491e-57 | RHOF          | Memory LGALS3 | -2.187009  | 0.222 | 0.408 | 6.797291e-53 | 15 |
| 4.861412e-57 | JCHAIN        | Memory LGALS3 | 0.4075785  | 0.932 | 0.744 | 8.667411e-53 | 15 |
| 6.263256e-57 | RAN           | Memory LGALS3 | -0.8205007 | 0.758 | 0.871 | 1.116676e-52 | 15 |
| 1.527244e-56 | CD52          | Memory LGALS3 | -1.042654  | 0.423 | 0.592 | 2.722924e-52 | 15 |
| 3.098608e-56 | MARCKSL1      | Memory LGALS3 | 0.6842878  | 0.71  | 0.472 | 5.524508e-52 | 15 |
| 8.331836e-56 | SQSTM1        | Memory LGALS3 | 0.6541473  | 0.358 | 0.163 | 1.485483e-51 | 15 |
| 3.736425e-55 | SAMSN1        | Memory LGALS3 | 0.496771   | 0.942 | 0.863 | 6.661673e-51 | 15 |
| 2.965034e-54 | Memory LGALS3 |               | 0.5569831  | 0.406 | 0.184 | 5.286358e-50 | 15 |
| 6.116234e-54 | ATP1A1        | Memory LGALS3 | -0.9119634 | 0.106 | 0.308 | 1.090463e-49 | 15 |
| 1.321485e-53 | BCL7A         | Memory LGALS3 | 0.6366246  | 0.539 | 0.262 | 2.356076e-49 | 15 |

UBC



|          |               |              |           |       |              |              |    |
|----------|---------------|--------------|-----------|-------|--------------|--------------|----|
| GPR183   | Memory LGALS3 | 1.773676e-53 | 0.4943084 | 0.192 | 0.064        | 3.162287e-49 | 15 |
| TEX9     | Memory LGALS3 | 2.470313e-53 | 0.5871535 | 0.387 | 0.178        | 4.404321e-49 | 15 |
| TUBA1C   | Memory LGALS3 | 2.47069e-53  | 0.4887018 | 0.241 | 0.079        | 4.404994e-49 | 15 |
| KCNN4    | Memory LGALS3 | 2.48417e-53  | 0.5512073 | 0.364 | 0.157        | 4.429027e-49 | 15 |
| PPP1R14B | Memory LGALS3 | 1.19647e-52  | 0.3769132 | 0.106 | 0.011        | 2.133187e-48 | 15 |
| TMEM273  | Memory LGALS3 | 9.597661e-52 | -0.733536 | 0.043 | 0.198        | 1.711167e-47 | 15 |
| FAM129C  | Memory LGALS3 | 9.861779e-52 | 0.3391662 | 0.105 | 0.018        | 1.758257e-47 | 15 |
| NEDD4L   | Memory LGALS3 | 3.817276e-51 | 0.3761262 | 0.926 | 0.756        | 6.805821e-47 | 15 |
| PSMA7    | Memory LGALS3 | 6.735117e-51 | 0.4829427 | 0.824 | 0.591        | 1.200804e-46 | 15 |
| LDHA     | Memory LGALS3 | 7.429425e-51 | 0.5152826 | 0.544 | 0.298        | 1.324592e-46 | 15 |
| CD27     | Memory LGALS3 | 5.125307e-50 | 0.4194015 | 0.206 | 0.068        | 9.13791e-46  | 15 |
| NEK6     | Memory LGALS3 | 1.179162e-49 | 0.4290166 | 0.885 | 0.699        | 2.102328e-45 | 15 |
| TPI1     | Memory LGALS3 | 2.611838e-49 | 0.5020248 | 0.614 | 0.375        | 4.656645e-45 | 15 |
| ANXA7    | Memory LGALS3 | 4.393938e-49 | 0.3974719 | 0.154 | 0.039        | 7.833952e-45 | 15 |
| BHLHE41  | Memory LGALS3 | 2.069389e-48 | 0.6608698 | 0.407 | 0.166        | 3.689515e-44 | 15 |
| TNFRSF18 | Memory LGALS3 | 2.628227e-48 | 0.4403323 | 0.831 | 0.6          | 4.685866e-44 | 15 |
| RBM3     | Memory LGALS3 | 2.922501e-48 | 0.3253507 | 0.996 | 0.928        | 5.210527e-44 | 15 |
| NPM1     | Memory LGALS3 | 7.663234e-48 | 0.4086939 | 0.821 | 0.603        | 1.366278e-43 | 15 |
| POLR2L   | Memory LGALS3 | 1.148345e-47 | 0.4341204 | 0.121 | 0.019        | 2.047384e-43 | 15 |
| CCL22    | Memory LGALS3 | 1.977276e-47 | 0.5760152 | 0.307 | 0.125        | 3.525285e-43 | 15 |
| EEA1     | Memory LGALS3 | 4.246539e-47 | -1.070646 | 0.387 | 0.537        | 7.571154e-43 | 15 |
| ISG20    | Memory LGALS3 | 9.412377e-47 | 0.5455831 | 0.527 | 0.299        | 1.678133e-42 | 15 |
| CD99     | Memory LGALS3 | 2.689941e-46 | 0.4409915 | 0.818 | 0.606        | 4.795896e-42 | 15 |
| PTGES3   | Memory LGALS3 | 1.284911e-45 | 0.403109  | 0.823 | 2.290868e-41 | 15           | 15 |
| ATP5F1B  | Memory LGALS3 | 2.111811e-45 | 0.4845243 | 0.315 | 0.147        | 3.765148e-41 | 15 |

|              |               |       |       |              |    |  |
|--------------|---------------|-------|-------|--------------|----|--|
| CLECL1       | Memory LGALS3 |       |       |              |    |  |
| 4.477216e-45 | -1.295121     | 0.274 | 0.432 | 7.982428e-41 | 15 |  |
| STMN1        | Memory LGALS3 |       |       |              |    |  |
| 5.947233e-45 | 0.5675268     | 0.407 | 0.191 | 1.060332e-40 | 15 |  |
| TYMP         | Memory LGALS3 |       |       |              |    |  |
| 9.418731e-45 | -1.120519     | 0.204 | 0.376 | 1.679266e-40 | 15 |  |
| SELL         | Memory LGALS3 |       |       |              |    |  |
| 1.09275e-44  | 0.5584189     | 0.482 | 0.231 | 1.948264e-40 | 15 |  |
| CAPG         | Memory LGALS3 |       |       |              |    |  |
| 2.438446e-44 | 0.4268681     | 0.204 | 0.057 | 4.347505e-40 | 15 |  |
| FLNA         | Memory LGALS3 |       |       |              |    |  |
| 5.288694e-44 | 0.3412076     | 0.84  | 0.593 | 9.429213e-40 | 15 |  |
| PRDX1        | Memory LGALS3 |       |       |              |    |  |
| 5.439449e-44 | -0.4328758    | 0.973 | 0.976 | 9.697994e-40 | 15 |  |
| FTH1         | Memory LGALS3 |       |       |              |    |  |
| 1.05775e-43  | 0.4299973     | 0.133 | 0.034 | 1.885863e-39 | 15 |  |
| ATF5         | Memory LGALS3 |       |       |              |    |  |
| 2.724714e-43 | -1.231198     | 0.054 | 0.21  | 4.857892e-39 | 15 |  |
| RGS13        | Memory LGALS3 |       |       |              |    |  |
| 1.798765e-42 | 0.4211625     | 0.841 | 0.673 | 3.207018e-38 | 15 |  |
| TAGLN2       | Memory LGALS3 |       |       |              |    |  |
| 5.037187e-42 | 0.4164123     | 0.592 | 0.347 | 8.9808e-38   | 15 |  |
| TUBB4B       | Memory LGALS3 |       |       |              |    |  |
| 1.818452e-41 | 0.4842114     | 0.366 | 0.159 | 3.242118e-37 | 15 |  |
| MARCKS       | Memory LGALS3 |       |       |              |    |  |
| 4.498651e-41 | -0.6132026    | 0.015 | 0.125 | 8.020645e-37 | 15 |  |
| AL139020.1   | Memory LGALS3 |       |       |              |    |  |
| 8.228989e-41 | 0.3794507     | 0.821 | 0.615 | 1.467146e-36 | 15 |  |
| SUB1         | Memory LGALS3 |       |       |              |    |  |
| 1.97578e-40  | 0.4616569     | 0.39  | 0.188 | 3.522619e-36 | 15 |  |
| CYTH1        | Memory LGALS3 |       |       |              |    |  |
| 2.23759e-40  | 0.6273123     | 0.352 | 0.162 | 3.989399e-36 | 15 |  |
| CBX6         | Memory LGALS3 |       |       |              |    |  |
| 4.78968e-40  | 0.4250272     | 0.655 | 0.44  | 8.539521e-36 | 15 |  |
| PGAM1        | Memory LGALS3 |       |       |              |    |  |
| 6.566776e-40 | 0.3167349     | 0.125 | 0.025 | 1.17079e-35  | 15 |  |
| ATXN1        | Memory LGALS3 |       |       |              |    |  |
| 9.448781e-40 | 0.4823829     | 0.666 | 0.421 | 1.684623e-35 | 15 |  |
| PLP2         | Memory LGALS3 |       |       |              |    |  |
| 4.046589e-39 | 0.4562669     | 0.648 | 0.432 | 7.214664e-35 | 15 |  |
| COTL1        | Memory LGALS3 |       |       |              |    |  |
| 6.687377e-39 | 0.5232274     | 0.551 | 0.348 | 1.192292e-34 | 15 |  |
| ANXA5        | Memory LGALS3 |       |       |              |    |  |
| 7.148273e-39 | -0.6022556    | 0.017 | 0.137 | 1.274466e-34 | 15 |  |
| NEIL1        | Memory LGALS3 |       |       |              |    |  |
| 7.619492e-39 | 0.4448427     | 0.607 | 0.378 | 1.358479e-34 | 15 |  |
| C19orf70     | Memory LGALS3 |       |       |              |    |  |
| 7.985977e-39 | 0.3703679     | 0.596 | 0.393 | 1.42382e-34  | 15 |  |
| BASP1        | Memory LGALS3 |       |       |              |    |  |
| 5.20826e-38  | 0.4292197     | 0.534 | 0.315 | 9.285806e-34 | 15 |  |

|              |          |               |       |              |              |    |
|--------------|----------|---------------|-------|--------------|--------------|----|
| 9.268135e-38 | RHOG     | Memory LGALS3 | 0.194 | 0.059        | 1.652416e-33 | 15 |
| 9.739334e-38 | KYNU     | Memory LGALS3 | 0.855 | 0.675        | 1.736426e-33 | 15 |
| 1.454987e-37 | SRSF3    | Memory LGALS3 | 0.544 | 0.34         | 2.594097e-33 | 15 |
| 2.728988e-37 | RNH1     | Memory LGALS3 | 0.061 | 0.205        | 4.865513e-33 | 15 |
| 3.285797e-37 | HMCES    | Memory LGALS3 | 0.663 | 0.434        | 5.858248e-33 | 15 |
| 6.048027e-36 | HMGA1    | Memory LGALS3 | 0.756 | 0.571        | 1.078303e-31 | 15 |
| 1.397952e-35 | APRT     | Memory LGALS3 | 0.095 | 0.236        | 2.492408e-31 | 15 |
| 3.511638e-35 | IL4R     | Memory LGALS3 | 0.21  | 6.260899e-31 | 15           | 15 |
| 4.721838e-35 | EAF2     | Memory LGALS3 | 0.575 | 0.367        | 8.418565e-31 | 15 |
| 5.242858e-35 | ARHGDI1A | Memory LGALS3 | 0.563 | 0.351        | 9.347492e-31 | 15 |
| 6.39315e-35  | SARS     | Memory LGALS3 | 0.475 | 0.62         | 1.139835e-30 | 15 |
| 6.54035e-35  | MEF2C    | Memory LGALS3 | 0.041 | 0.155        | 1.166079e-30 | 15 |
| 1.232944e-34 | CD72     | Memory LGALS3 | 0.646 | 0.44         | 2.198216e-30 | 15 |
| 3.352731e-34 | C1QBP    | Memory LGALS3 | 0.546 | 0.347        | 5.977584e-30 | 15 |
| 4.366562e-34 | CHMP4B   | Memory LGALS3 | 0.441 | 0.237        | 7.785144e-30 | 15 |
| 4.429925e-34 | HLA-F    | Memory LGALS3 | 0.836 | 0.674        | 7.898113e-30 | 15 |
| 2.449008e-33 | MORF4L1  | Memory LGALS3 | 0.299 | 4.366337e-29 | 15           | 15 |
| 2.457704e-33 | GLRX3    | Memory LGALS3 | 0.094 | 0.2          | 4.38184e-29  | 15 |
| 2.658535e-33 | YBX3     | Memory LGALS3 | 0.858 | 0.692        | 4.739903e-29 | 15 |
| 3.63703e-33  | HNRNPDL  | Memory LGALS3 | 0.082 | 0.212        | 6.484461e-29 | 15 |
| 5.628666e-33 | FOS      | Memory LGALS3 | 0.999 | 0.998        | 1.003535e-28 | 15 |
| 6.727004e-33 | TMSB4X   | Memory LGALS3 | 0.244 | 0.098        | 1.199358e-28 | 15 |
| 8.771211e-33 | RUNX3    | Memory LGALS3 | 0.007 | 0.105        | 1.563819e-28 | 15 |
| 1.227205e-32 | SEMA4A   | Memory LGALS3 | 0.712 | 0.51         | 2.187984e-28 | 15 |
| 1.365173e-32 | UBE2I    | Memory LGALS3 | 0.321 | 0.159        | 2.433968e-28 | 15 |

|              |                                       |       |              |              |    |
|--------------|---------------------------------------|-------|--------------|--------------|----|
| 1.398446e-32 | KIAA1551 Memory LGALS3<br>0.5468932   | 0.369 | 0.207        | 2.49329e-28  | 15 |
| 1.882967e-32 | C19orf48 Memory LGALS3<br>0.3848009   | 0.596 | 0.414        | 3.357141e-28 | 15 |
| 2.08459e-32  | CTSH Memory LGALS3<br>-0.4794462      | 0.016 | 0.121        | 3.716616e-28 | 15 |
| 2.41691e-32  | CD38 Memory LGALS3<br>0.4121518       | 0.4   | 0.212        | 4.309109e-28 | 15 |
| 2.622284e-32 | C4orf48 Memory LGALS3<br>-0.7029684   | 0.133 | 0.255        | 4.675269e-28 | 15 |
| 3.017247e-32 | FCMR Memory LGALS3<br>0.3296434       | 0.808 | 0.622        | 5.379449e-28 | 15 |
| 3.570148e-32 | ATP6V0E1 Memory LGALS3<br>0.4394546   | 0.368 | 0.186        | 6.365217e-28 | 15 |
| 6.582459e-32 | RNF145 Memory LGALS3<br>-0.662286     | 0.08  | 0.214        | 1.173587e-27 | 15 |
| 1.088762e-31 | FAM111B Memory LGALS3<br>-0.6634561   | 0.127 | 0.278        | 1.941153e-27 | 15 |
| 1.584878e-31 | NCF1 Memory LGALS3<br>0.3862022       | 0.772 | 0.591        | 2.825678e-27 | 15 |
| 1.872515e-31 | TPM3 Memory LGALS3<br>0.4737177       | 0.41  | 0.227        | 3.338507e-27 | 15 |
| 2.386113e-31 | TARS Memory LGALS3<br>0.4051343       | 0.451 | 0.28         | 4.254201e-27 | 15 |
| 2.507681e-31 | CD82 Memory LGALS3<br>0.3967038       | 0.247 | 0.087        | 4.470945e-27 | 15 |
| 3.084003e-31 | AHNAK Memory LGALS3<br>-0.6443787     | 0.203 | 0.35         | 5.498468e-27 | 15 |
| 5.341219e-31 | ABRACL Memory LGALS3<br>0.370017      | 0.455 | 9.52286e-27  | 15           | 15 |
| 6.67332e-31  | GADD45GIP1 Memory LGALS3<br>0.4121612 | 0.308 | 0.144        | 1.189786e-26 | 15 |
| 2.592768e-30 | MVP Memory LGALS3<br>-0.5542335       | 0.016 | 0.111        | 4.622645e-26 | 15 |
| 3.423274e-30 | VPREB3 Memory LGALS3<br>0.3370083     | 0.939 | 0.852        | 6.103355e-26 | 15 |
| 6.971267e-30 | SH3BGRL3 Memory LGALS3<br>-0.6862221  | 0.226 | 0.367        | 1.242907e-25 | 15 |
| 8.856348e-30 | RCSD1 Memory LGALS3<br>0.486897       | 0.206 | 1.578998e-25 | 15           | 15 |
| 1.00684e-29  | MGST3 Memory LGALS3<br>0.4025024      | 0.558 | 0.34         | 1.795095e-25 | 15 |
| 1.485283e-29 | CAST Memory LGALS3<br>0.4017235       | 0.472 | 0.285        | 2.648111e-25 | 15 |
| 1.710051e-29 | DCTPP1 Memory LGALS3<br>-0.3781266    | 0.01  | 0.103        | 3.04885e-25  | 15 |
| 1.774048e-29 | MYBL2 Memory LGALS3<br>-0.6725868     | 0.305 | 0.443        | 3.162951e-25 | 15 |
| 5.187425e-29 | RHOH Memory LGALS3<br>0.3489483       | 0.812 | 0.649        | 9.248661e-25 | 15 |

|              |          |               |            |       |       |              |    |
|--------------|----------|---------------|------------|-------|-------|--------------|----|
| 5.634061e-29 | TMBIM6   | Memory LGALS3 | -0.5168193 | 0.718 | 0.772 | 1.004497e-24 | 15 |
| 5.948379e-29 | SEC62    | Memory LGALS3 | 0.4527398  | 0.419 | 0.246 | 1.060536e-24 | 15 |
| 5.992398e-29 | GARS     | Memory LGALS3 | 0.3985822  | 0.389 | 0.215 | 1.068385e-24 | 15 |
| 1.519757e-28 | CCDC50   | Memory LGALS3 | 0.3489686  | 0.685 | 0.493 | 2.709575e-24 | 15 |
| 2.809745e-28 | HSPE1    | Memory LGALS3 | -0.5145925 | 0.056 | 0.139 | 5.009494e-24 | 15 |
| 3.16803e-28  | FCER2    | Memory LGALS3 | 0.3043773  | 0.892 | 0.754 | 5.648281e-24 | 15 |
| 4.289656e-28 | MT-ND5   | Memory LGALS3 | -0.5446269 | 0.048 | 0.164 | 7.648027e-24 | 15 |
| 9.20659e-28  | SUSD3    | Memory LGALS3 | 0.3071771  | 0.512 | 0.394 | 1.641443e-23 | 15 |
| 1.094223e-27 | CSTB     | Memory LGALS3 | 0.3951758  | 0.313 | 0.161 | 1.95089e-23  | 15 |
| 1.137386e-27 | TES      | Memory LGALS3 | 0.3580594  | 0.583 | 0.388 | 2.027845e-23 | 15 |
| 1.21623e-27  | PHB      | Memory LGALS3 | 0.3311318  | 0.645 | 0.44  | 2.168416e-23 | 15 |
| 1.7366e-27   | KLF6     | Memory LGALS3 | 0.331759   | 0.786 | 0.628 | 3.096185e-23 | 15 |
| 1.907087e-27 | COX7B    | Memory LGALS3 | 0.3561153  | 0.23  | 0.092 | 3.400145e-23 | 15 |
| 2.352794e-27 | CYSLTR1  | Memory LGALS3 | 0.3173111  | 0.717 | 0.525 | 4.194797e-23 | 15 |
| 2.846346e-27 | PSME2    | Memory LGALS3 | 0.4221703  | 0.187 | 0.075 | 5.07475e-23  | 15 |
| 3.854457e-27 | SLAMF7   | Memory LGALS3 | 0.387598   | 0.346 | 0.206 | 6.872111e-23 | 15 |
| 4.118458e-27 | CFLAR    | Memory LGALS3 | 0.3617084  | 0.549 | 0.37  | 7.342798e-23 | 15 |
| 4.171904e-27 | PSMC3    | Memory LGALS3 | -0.5350126 | 0.096 | 0.198 | 7.438087e-23 | 15 |
| 5.204851e-27 | CLEC2B   | Memory LGALS3 | 0.3758979  | 0.513 | 0.347 | 9.279729e-23 | 15 |
| 6.19013e-27  | MRPS6    | Memory LGALS3 | 0.3801298  | 0.297 | 0.156 | 1.103638e-22 | 15 |
| 1.086457e-26 | RBPJ     | Memory LGALS3 | -0.6018515 | 0.096 | 0.209 | 1.937044e-22 | 15 |
| 1.217505e-26 | C16orf74 | Memory LGALS3 | -0.6413296 | 0.128 | 0.247 | 2.17069e-22  | 15 |
| 2.353436e-26 | RASGRP2  | Memory LGALS3 | 0.4842588  | 0.69  | 0.53  | 4.195941e-22 | 15 |
| 2.617293e-26 | ATP6V1F  | Memory LGALS3 | -0.6057637 | 0.173 | 0.281 | 4.666372e-22 | 15 |
| 5.523927e-26 | ADAM28   | Memory LGALS3 | -0.4997242 | 0.061 | 0.16  | 9.848609e-22 | 15 |

|              |                                           |       |              |              |    |
|--------------|-------------------------------------------|-------|--------------|--------------|----|
| 8.149106e-26 | GLIPR1<br>Memory LGALS3<br>-0.6011173     | 0.107 | 0.214        | 1.452904e-21 | 15 |
| 9.170973e-26 | LBH<br>Memory LGALS3<br>0.3667128         | 0.394 | 0.235        | 1.635093e-21 | 15 |
| 9.750754e-26 | MRPL15<br>Memory LGALS3<br>0.3591144      | 0.503 | 0.316        | 1.738462e-21 | 15 |
| 1.26517e-25  | TUBA1A<br>Memory LGALS3<br>0.350704 0.254 | 0.12  | 2.255671e-21 | 15           |    |
| 1.265938e-25 | HTATIP2<br>Memory LGALS3<br>0.3417467     | 0.668 | 0.476        | 2.257041e-21 | 15 |
| 1.905882e-25 | ISCU<br>Memory LGALS3<br>0.3443467        | 0.326 | 0.167        | 3.397997e-21 | 15 |
| 2.427627e-25 | MFSD10<br>Memory LGALS3<br>-0.5684031     | 0.142 | 0.267        | 4.328216e-21 | 15 |
| 4.402167e-25 | CD22<br>Memory LGALS3<br>-0.4687814       | 0.036 | 0.123        | 7.848624e-21 | 15 |
| 5.500043e-25 | LPP<br>Memory LGALS3<br>-0.5331603        | 0.145 | 0.264        | 9.806026e-21 | 15 |
| 7.670503e-25 | CCDC69<br>Memory LGALS3<br>0.5047583      | 0.495 | 0.322        | 1.367574e-20 | 15 |
| 9.480295e-25 | SLC3A2<br>Memory LGALS3<br>0.3963804      | 0.246 | 0.123        | 1.690242e-20 | 15 |
| 1.131033e-24 | SLC1A5<br>Memory LGALS3<br>0.3694533      | 0.236 | 0.108        | 2.016519e-20 | 15 |
| 2.087356e-24 | NUDT4<br>Memory LGALS3<br>0.3113207       | 0.338 | 0.193        | 3.721548e-20 | 15 |
| 2.807318e-24 | TAP1<br>Memory LGALS3<br>0.3591328        | 0.316 | 0.165        | 5.005168e-20 | 15 |
| 2.895577e-24 | CYSTM1<br>Memory LGALS3<br>0.3197717      | 0.629 | 0.438        | 5.162524e-20 | 15 |
| 3.281242e-24 | CCT6A<br>Memory LGALS3<br>-0.5930016      | 0.315 | 0.436        | 5.850127e-20 | 15 |
| 3.393176e-24 | CYB561A3<br>Memory LGALS3<br>-0.4394148   | 0.048 | 0.136        | 6.049693e-20 | 15 |
| 4.011025e-24 | PLEKHA2<br>Memory LGALS3<br>0.3283719     | 0.99  | 0.962        | 7.151257e-20 | 15 |
| 4.931521e-24 | FTL<br>Memory LGALS3<br>-0.6511482        | 0.237 | 0.34         | 8.792408e-20 | 15 |
| 5.033063e-24 | HVCN1<br>Memory LGALS3<br>0.3587502       | 0.419 | 0.273        | 8.973448e-20 | 15 |
| 5.244238e-24 | ATOX1<br>Memory LGALS3<br>0.3155829       | 0.788 | 0.599        | 9.349952e-20 | 15 |
| 7.32424e-24  | CDC42<br>Memory LGALS3<br>-0.6309217      | 0.245 | 0.35         | 1.305839e-19 | 15 |
| 7.651749e-24 | TRAF3IP3<br>Memory LGALS3<br>-0.7120049   | 0.111 | 0.214        | 1.36423e-19  | 15 |
| 8.347875e-24 | PLAC8<br>Memory LGALS3<br>0.3690046       | 0.575 | 0.375        | 1.488343e-19 | 15 |
| 1.098979e-23 | PDCD4<br>Memory LGALS3<br>0.3346768       | 0.473 | 0.292        | 1.959369e-19 | 15 |

|              |          |               |            |       |       |              |    |
|--------------|----------|---------------|------------|-------|-------|--------------|----|
| 1.217563e-23 | PDCD5    | Memory LGALS3 | -0.6459196 | 0.127 | 0.237 | 2.170792e-19 | 15 |
| 1.966612e-23 | UBE2J1   | Memory LGALS3 | -0.4683609 | 0.988 | 0.985 | 3.506273e-19 | 15 |
| 2.118093e-23 | TMSB10   | Memory LGALS3 | -0.5990487 | 0.18  | 0.291 | 3.776348e-19 | 15 |
| 2.352829e-23 | RUBCNL   | Memory LGALS3 | 0.3241797  | 0.632 | 0.459 | 4.194858e-19 | 15 |
| 2.784775e-23 | PRMT1    | Memory LGALS3 | 0.3456367  | 0.248 | 0.114 | 4.964976e-19 | 15 |
| 3.331276e-23 | VRK2     | Memory LGALS3 | 0.3897705  | 0.347 | 0.2   | 5.939332e-19 | 15 |
| 5.84402e-23  | PTPN1    | Memory LGALS3 | -1.346829  | 0.075 | 0.178 | 1.04193e-18  | 15 |
| 6.78559e-23  | MZB1     | Memory LGALS3 | 0.3371708  | 0.649 | 0.48  | 1.209803e-18 | 15 |
| 7.817756e-23 | RPS27L   | Memory LGALS3 | 0.3288656  | 0.256 | 0.117 | 1.393828e-18 | 15 |
| 8.606335e-23 | LACTB    | Memory LGALS3 | 0.3276121  | 0.375 | 0.228 | 1.534423e-18 | 15 |
| 1.03968e-22  | RTCB     | Memory LGALS3 | 0.3987317  | 0.449 | 0.305 | 1.853646e-18 | 15 |
| 1.434342e-22 | CALR     | Memory LGALS3 | 0.3305065  | 0.473 | 0.298 | 2.557288e-18 | 15 |
| 2.231415e-22 | ATP1B3   | Memory LGALS3 | 0.3030219  | 0.507 | 0.34  | 3.978389e-18 | 15 |
| 3.254143e-22 | PSMC4    | Memory LGALS3 | 0.3489199  | 0.548 | 0.355 | 5.801811e-18 | 15 |
| 3.624441e-22 | ARID5B   | Memory LGALS3 | 0.3058561  | 0.514 | 0.338 | 6.462016e-18 | 15 |
| 5.65836e-22  | CMTM6    | Memory LGALS3 | 0.3289817  | 0.252 | 0.128 | 1.008829e-17 | 15 |
| 1.736912e-21 | EMD      | Memory LGALS3 | -0.6999043 | 0.222 | 0.318 | 3.096741e-17 | 15 |
| 3.822279e-21 | CD69     | Memory LGALS3 | -0.4687344 | 0.055 | 0.161 | 6.814741e-17 | 15 |
| 3.888844e-21 | KIAA0040 | Memory LGALS3 | -0.3790347 | 0.029 | 0.106 | 6.93342e-17  | 15 |
| 5.202459e-21 | RMI2     | Memory LGALS3 | 0.3693457  | 0.268 | 0.149 | 9.275464e-17 | 15 |
| 7.500256e-21 | PEA15    | Memory LGALS3 | -1.579309  | 0.921 | 0.927 | 1.337221e-16 | 15 |
| 1.156289e-20 | IGKC     | Memory LGALS3 | 0.3032597  | 0.75  | 0.582 | 2.061547e-16 | 15 |
| 1.21402e-20  | EIF2S2   | Memory LGALS3 | -0.5494759 | 0.179 | 0.28  | 2.164476e-16 | 15 |
| 1.216196e-20 | PIM2     | Memory LGALS3 | -0.4547776 | 0.098 | 0.197 | 2.168355e-16 | 15 |
| 1.346316e-20 | AFF3     | Memory LGALS3 | -0.4113617 | 0.038 | 0.107 | 2.400346e-16 | 15 |

|              |            |               |       |       |              |    |
|--------------|------------|---------------|-------|-------|--------------|----|
| 1.948453e-20 | C1orf162   | Memory LGALS3 | 0.2   | 0.089 | 3.473897e-16 | 15 |
| 2.101062e-20 | NFE2L1     | Memory LGALS3 | 0.043 | 0.151 | 3.745983e-16 | 15 |
| 2.2542e-20   | BIK        | Memory LGALS3 | 0.143 | 0.057 | 4.019013e-16 | 15 |
| 2.787565e-20 | DUSP10     | Memory LGALS3 | 0.559 | 0.381 | 4.969949e-16 | 15 |
| 2.982377e-20 | NHP2       | Memory LGALS3 | 0.316 | 0.182 | 5.317281e-16 | 15 |
| 5.058427e-20 | YIF1A      | Memory LGALS3 | 0.12  | 0.222 | 9.01867e-16  | 15 |
| 5.624054e-20 | LY86       | Memory LGALS3 | 0.081 | 0.183 | 1.002713e-15 | 15 |
| 6.948727e-20 | LCK        | Memory LGALS3 | 0.463 | 0.313 | 1.238889e-15 | 15 |
| 8.404303e-20 | TCP1       | Memory LGALS3 | 0.385 | 0.488 | 1.498403e-15 | 15 |
| 8.723317e-20 | GMFG       | Memory LGALS3 | 0.026 | 0.102 | 1.55528e-15  | 15 |
| 1.222823e-19 | CENPM      | Memory LGALS3 | 0.191 | 0.3   | 2.180171e-15 | 15 |
| 1.228787e-19 | GGA2       | Memory LGALS3 | 0.283 | 0.386 | 2.190804e-15 | 15 |
| 1.803954e-19 | EVL        | Memory LGALS3 | 0.318 | 0.179 | 3.21627e-15  | 15 |
| 2.659507e-19 | ARL2       | Memory LGALS3 | 0.054 | 0.149 | 4.741636e-15 | 15 |
| 3.05838e-19  | SEC14L1    | Memory LGALS3 | 0.721 | 0.778 | 5.452786e-15 | 15 |
| 5.617209e-19 | ARHGDI B   | Memory LGALS3 | 0.087 | 0.188 | 1.001492e-14 | 15 |
| 6.469649e-19 | P2RX5      | Memory LGALS3 | 0.058 | 0.156 | 1.153474e-14 | 15 |
| 6.825673e-19 | CD81       | Memory LGALS3 | 0.96  | 0.939 | 1.216949e-14 | 15 |
| 9.130914e-19 | H3F3A      | Memory LGALS3 | 0.105 | 0.185 | 1.627951e-14 | 15 |
| 1.289163e-18 | PLPP5      | Memory LGALS3 | 0.266 | 0.142 | 2.298449e-14 | 15 |
| 1.729191e-18 | SERPINB9   | Memory LGALS3 | 0.354 | 0.225 | 3.082975e-14 | 15 |
| 1.966725e-18 | SINHCAF    | Memory LGALS3 | 0.309 | 0.406 | 3.506475e-14 | 15 |
| 2.150069e-18 | STX7       | Memory LGALS3 | 0.032 | 0.113 | 3.833358e-14 | 15 |
| 2.544275e-18 | AC023590.1 | Memory LGALS3 | 0.203 | 0.286 | 4.536188e-14 | 15 |
| 3.878929e-18 | GNG7       | Memory LGALS3 | 0.051 | 0.127 | 6.915743e-14 | 15 |



|              |            |               |       |              |              |    |
|--------------|------------|---------------|-------|--------------|--------------|----|
| 4.747057e-18 | AC025164.1 | Memory LGALS3 | 0.068 | 0.156        | 8.463527e-14 | 15 |
| 4.7919e-18   | TSPAN13    | Memory LGALS3 | 0.097 | 0.176        | 8.543478e-14 | 15 |
| 4.924665e-18 | MARCH1     | Memory LGALS3 | 0.147 | 0.239        | 8.780184e-14 | 15 |
| 1.103036e-17 | CCND3      | Memory LGALS3 | 0.08  | 0.167        | 1.966603e-13 | 15 |
| 1.149175e-17 | DEF8       | Memory LGALS3 | 0.296 | 0.174        | 2.048864e-13 | 15 |
| 1.164705e-17 | BCL2A1     | Memory LGALS3 | 0.207 | 0.295        | 2.076553e-13 | 15 |
| 1.382784e-17 | BCL11A     | Memory LGALS3 | 0.324 | 2.465366e-13 | 15           | 15 |
| 2.143734e-17 | TNFRSF13C  | Memory LGALS3 | 0.677 | 0.726        | 3.822062e-13 | 15 |
| 2.746375e-17 | LIMD2      | Memory LGALS3 | 0.547 | 0.394        | 4.896512e-13 | 15 |
| 4.084421e-17 | ATF4       | Memory LGALS3 | 0.547 | 0.577        | 7.282114e-13 | 15 |
| 5.318352e-17 | SARAF      | Memory LGALS3 | 0.104 | 0.188        | 9.482089e-13 | 15 |
| 6.201528e-17 | CDCA7L     | Memory LGALS3 | 0.311 | 0.4          | 1.10567e-12  | 15 |
| 6.279921e-17 | ORAI2      | Memory LGALS3 | 0.293 | 0.377        | 1.119647e-12 | 15 |
| 7.049917e-17 | ACADM      | Memory LGALS3 | 0.163 | 0.261        | 1.25693e-12  | 15 |
| 7.736207e-17 | SYNE2      | Memory LGALS3 | 0.05  | 0.129        | 1.379288e-12 | 15 |
| 1.033002e-16 | STAP1      | Memory LGALS3 | 0.313 | 0.185        | 1.84174e-12  | 15 |
| 1.069255e-16 | GPATCH4    | Memory LGALS3 | 0.247 | 0.133        | 1.906375e-12 | 15 |
| 1.106454e-16 | PSAT1      | Memory LGALS3 | 0.066 | 0.148        | 1.972696e-12 | 15 |
| 1.703758e-16 | TAGAP      | Memory LGALS3 | 0.179 | 0.277        | 3.03763e-12  | 15 |
| 1.948543e-16 | ITGAE      | Memory LGALS3 | 0.078 | 0.161        | 3.474058e-12 | 15 |
| 4.325334e-16 | APLP2      | Memory LGALS3 | 0.238 | 0.298        | 7.711637e-12 | 15 |
| 6.089767e-16 | LINC00926  | Memory LGALS3 | 0.093 | 0.188        | 1.085745e-11 | 15 |
| 6.878137e-16 | RGS2       | Memory LGALS3 | 0.093 | 0.189        | 1.226303e-11 | 15 |
| 7.402611e-16 | HLA-D0B    | Memory LGALS3 | 0.068 | 0.171        | 1.319812e-11 | 15 |
| 8.058651e-16 | CCDC88A    | Memory LGALS3 | 0.193 | 0.097        | 1.436777e-11 | 15 |

|              |           |               |            |       |       |              |    |
|--------------|-----------|---------------|------------|-------|-------|--------------|----|
| 8.960388e-16 | SGK1      | Memory LGALS3 | -0.3962689 | 0.05  | 0.111 | 1.597548e-11 | 15 |
| 9.748055e-16 | LINC02397 | Memory LGALS3 | -0.5545885 | 0.404 | 0.212 | 1.737981e-11 | 15 |
| 9.90441e-16  | IGHG1     | Memory LGALS3 | -0.3311922 | 0.057 | 0.123 | 1.765857e-11 | 15 |
| 1.020632e-15 | ZNF318    | Memory LGALS3 | 0.311081   | 0.168 | 0.093 | 1.819685e-11 | 15 |
| 1.615345e-15 | MT2A      | Memory LGALS3 | -0.3245626 | 0.043 | 0.122 | 2.879998e-11 | 15 |
| 1.682208e-15 | VNN2      | Memory LGALS3 | -0.456119  | 0.164 | 0.244 | 2.999208e-11 | 15 |
| 3.841607e-15 | PHACTR1   | Memory LGALS3 | -0.5357578 | 0.263 | 0.348 | 6.849201e-11 | 15 |
| 4.743905e-15 | BIRC3     | Memory LGALS3 | -0.5829714 | 0.957 | 0.933 | 8.457908e-11 | 15 |
| 5.751229e-15 | SERF2     | Memory LGALS3 | -0.3709295 | 0.078 | 0.171 | 1.025387e-10 | 15 |
| 1.051871e-14 | SEL1L3    | Memory LGALS3 | -0.3504861 | 0.081 | 0.151 | 1.87538e-10  | 15 |
| 2.984406e-14 | ARHGAP9   | Memory LGALS3 | -0.3325601 | 0.055 | 0.115 | 5.320898e-10 | 15 |
| 4.807521e-14 | LGALS9    | Memory LGALS3 | 0.3033147  | 0.347 | 0.231 | 8.571329e-10 | 15 |
| 7.597117e-14 | MTHFD2    | Memory LGALS3 | -0.3680663 | 0.113 | 0.159 | 1.35449e-09  | 15 |
| 8.012292e-14 | SLC2A3    | Memory LGALS3 | -0.5010461 | 0.402 | 0.468 | 1.428511e-09 | 15 |
| 1.067476e-13 | ITM2B     | Memory LGALS3 | -0.5219448 | 0.241 | 0.325 | 1.903203e-09 | 15 |
| 2.765563e-13 | AES       | Memory LGALS3 | -0.4581428 | 0.341 | 0.424 | 4.930723e-09 | 15 |
| 4.426338e-13 | TMEM123   | Memory LGALS3 | -0.4032836 | 0.092 | 0.175 | 7.891717e-09 | 15 |
| 8.105549e-13 | TMEM156   | Memory LGALS3 | 0.3103012  | 0.284 | 0.157 | 1.445138e-08 | 15 |
| 9.673629e-13 | DDIT4     | Memory LGALS3 | -0.3858089 | 0.136 | 0.209 | 1.724711e-08 | 15 |
| 1.135618e-12 | SNHG25    | Memory LGALS3 | -0.4247261 | 0.253 | 0.334 | 2.024694e-08 | 15 |
| 1.516644e-12 | BPTF      | Memory LGALS3 | -0.4749207 | 0.224 | 0.291 | 2.704025e-08 | 15 |
| 1.648568e-12 | DCK       | Memory LGALS3 | -0.460357  | 0.364 | 0.448 | 2.939232e-08 | 15 |
| 2.116436e-12 | BTG2      | Memory LGALS3 | -0.3261171 | 0.067 | 0.129 | 3.773394e-08 | 15 |
| 2.567923e-12 | CCNG2     | Memory LGALS3 | -0.4340748 | 0.672 | 0.7   | 4.57835e-08  | 15 |
| 3.053806e-12 | CCNI      | Memory LGALS3 | -0.9172164 | 0.132 | 0.213 | 5.44463e-08  | 15 |

|              |            |               |            |       |       |              |    |
|--------------|------------|---------------|------------|-------|-------|--------------|----|
| 3.808896e-12 | PLCG2      | Memory LGALS3 | -0.3241993 | 0.124 | 0.199 | 6.790881e-08 | 15 |
| 5.128762e-12 | POLD4      | Memory LGALS3 | -0.3107628 | 0.08  | 0.147 | 9.144069e-08 | 15 |
| 1.304753e-11 | MID1IP1    | Memory LGALS3 | -0.4748318 | 0.28  | 0.34  | 2.326244e-07 | 15 |
| 1.488954e-11 | STK17A     | Memory LGALS3 | -0.4381131 | 0.215 | 0.287 | 2.654656e-07 | 15 |
| 1.585014e-11 | PPM1K      | Memory LGALS3 | -0.3448747 | 0.111 | 0.17  | 2.825921e-07 | 15 |
| 3.82176e-11  | TMEM154    | Memory LGALS3 | -0.4557329 | 0.177 | 0.242 | 6.813816e-07 | 15 |
| 4.914345e-11 | RGS1       | Memory LGALS3 | -0.5179276 | 0.271 | 0.342 | 8.761785e-07 | 15 |
| 5.683847e-11 | LRMP       | Memory LGALS3 | -0.3775408 | 0.189 | 0.221 | 1.013373e-06 | 15 |
| 6.849788e-11 | GBP2       | Memory LGALS3 | -0.3460983 | 0.191 | 0.26  | 1.221249e-06 | 15 |
| 7.427329e-11 | CNN2       | Memory LGALS3 | -0.3184255 | 0.068 | 0.14  | 1.324218e-06 | 15 |
| 8.86166e-11  | SIT1       | Memory LGALS3 | -0.3286474 | 0.1   | 0.157 | 1.579945e-06 | 15 |
| 9.567832e-11 | JUND       | Memory LGALS3 | -0.3768705 | 0.165 | 0.236 | 1.705849e-06 | 15 |
| 1.266508e-10 | ZCCHC7     | Memory LGALS3 | -0.4742609 | 0.47  | 0.504 | 2.258056e-06 | 15 |
| 1.306048e-10 | TSC22D3    | Memory LGALS3 | -0.4795546 | 0.389 | 0.43  | 2.328553e-06 | 15 |
| 1.60635e-10  | IRF8       | Memory LGALS3 | -0.3039076 | 0.16  | 0.212 | 2.863962e-06 | 15 |
| 1.913384e-10 | GABPB1-AS1 | Memory LGALS3 | -0.4098314 | 0.088 | 0.144 | 3.411372e-06 | 15 |
| 1.939734e-10 | DUSP1      | Memory LGALS3 | -0.3602822 | 0.139 | 0.21  | 3.458352e-06 | 15 |
| 1.98316e-10  | GLRX       | Memory LGALS3 | -0.4505224 | 0.387 | 0.455 | 3.535776e-06 | 15 |
| 2.0262e-10   | PTPRC      | Memory LGALS3 | -0.3061757 | 0.08  | 0.148 | 3.612512e-06 | 15 |
| 2.870157e-10 | RBM38      | Memory LGALS3 | -0.481332  | 0.252 | 0.304 | 5.117203e-06 | 15 |
| 3.333516e-10 | ZFP36L2    | Memory LGALS3 | -0.3817169 | 0.715 | 0.723 | 5.943325e-06 | 15 |
| 4.021664e-10 | SRSF5      | Memory LGALS3 | -0.3193535 | 0.091 | 0.149 | 7.170224e-06 | 15 |
| 4.711274e-10 | ALOX5      | Memory LGALS3 | -1.420761  | 0.294 | 0.303 | 8.39973e-06  | 15 |
| 8.760603e-10 | HMGB2      | Memory LGALS3 | -0.3522353 | 0.135 | 0.186 | 1.561928e-05 | 15 |
| 8.953157e-10 | ANKRD44    | Memory LGALS3 | -2.196193  | 0.543 | 0.647 | 1.596258e-05 | 15 |

|              |         |               |            |       |       |              |    |
|--------------|---------|---------------|------------|-------|-------|--------------|----|
| 9.377024e-10 | IGLC2   | Memory LGALS3 | -0.5141122 | 0.432 | 0.456 | 1.67183e-05  | 15 |
| 1.109805e-09 | JUNB    | Memory LGALS3 | -0.4639325 | 0.194 | 0.239 | 1.978672e-05 | 15 |
| 1.313356e-09 | CD55    | Memory LGALS3 | -0.3769426 | 0.152 | 0.209 | 2.341582e-05 | 15 |
| 1.601714e-09 | CCDC32  | Memory LGALS3 | -0.3637669 | 0.201 | 0.266 | 2.855696e-05 | 15 |
| 1.623955e-09 | RBM6    | Memory LGALS3 | -0.3285527 | 0.068 | 0.12  | 2.895349e-05 | 15 |
| 2.378695e-09 | UBE2S   | Memory LGALS3 | -1.803909  | 0.163 | 0.125 | 4.240975e-05 | 15 |
| 2.807709e-09 | IGHG2   | Memory LGALS3 | -0.3798066 | 0.12  | 0.176 | 5.005864e-05 | 15 |
| 3.738552e-09 | QRSL1   | Memory LGALS3 | -0.3316735 | 0.182 | 0.248 | 6.665464e-05 | 15 |
| 5.202503e-09 | CSK     | Memory LGALS3 | -2.337613  | 0.628 | 0.446 | 9.275542e-05 | 15 |
| 5.589075e-09 | IGHG3   | Memory LGALS3 | -0.3295665 | 0.189 | 0.252 | 9.964761e-05 | 15 |
| 7.358587e-09 | TIFA    | Memory LGALS3 | -0.3363308 | 0.19  | 0.229 | 0.0001311962 | 15 |
| 7.520849e-09 | NT5C3A  | Memory LGALS3 | -0.4655615 | 0.578 | 0.627 | 0.0001340892 | 15 |
| 8.279021e-09 | HLA-DMB | Memory LGALS3 | -0.3774808 | 0.301 | 0.362 | 0.0001476067 | 15 |
| 9.199307e-09 | TPD52   | Memory LGALS3 | -0.3376182 | 0.608 | 0.627 | 0.0001640144 | 15 |
| 1.005197e-08 | SELEN0H | Memory LGALS3 | -0.3841851 | 0.282 | 0.321 | 0.0001792166 | 15 |
| 1.594649e-08 | LTA4H   | Memory LGALS3 | -0.3760662 | 0.176 | 0.239 | 0.00028431   | 15 |
| 1.83126e-08  | GCHFR   | Memory LGALS3 | -0.3785102 | 0.466 | 0.502 | 0.0003264954 | 15 |
| 2.45429e-08  | FOXP1   | Memory LGALS3 | -0.3624423 | 0.476 | 0.507 | 0.0004375754 | 15 |
| 4.083421e-08 | FDFT1   | Memory LGALS3 | -0.3554378 | 0.304 | 0.359 | 0.0007280331 | 15 |
| 4.20561e-08  | TMEM243 | Memory LGALS3 | -0.4370553 | 0.461 | 0.493 | 0.0007498183 | 15 |
| 5.783511e-08 | C4orf3  | Memory LGALS3 | -0.3472626 | 0.29  | 0.328 | 0.001031142  | 15 |
| 6.057686e-08 | PTPN6   | Memory LGALS3 | -0.4016224 | 0.351 | 0.353 | 0.001080025  | 15 |
| 8.113454e-08 | TXNIP   | Memory LGALS3 | -0.3147498 | 0.215 | 0.264 | 0.001446548  | 15 |
| 9.342755e-08 | NSD3    | Memory LGALS3 | -0.3315063 | 0.298 | 0.356 | 0.00166572   | 15 |
| 1.484127e-07 | CD19    | Memory LGALS3 | -0.4188865 | 0.373 | 0.421 | 0.00264605   | 15 |

|              |            |               |       |       |             |    |
|--------------|------------|---------------|-------|-------|-------------|----|
| 1.984478e-07 | AC114760.2 | Memory LGALS3 | 0.229 | 0.284 | 0.003538126 | 15 |
| 2.222431e-07 | LAT2       | Memory LGALS3 | 0.277 | 0.323 | 0.003962373 | 15 |
| 2.834058e-07 | NAA38      | Memory LGALS3 | 0.171 | 0.219 | 0.005052843 | 15 |
| 3.122932e-07 | NANS       | Memory LGALS3 | 0.556 | 0.571 | 0.005567875 | 15 |
| 3.48103e-07  | SNX2       | Memory LGALS3 | 0.216 | 0.258 | 0.006206329 | 15 |
| 4.159237e-07 | MDM4       | Memory LGALS3 | 0.448 | 0.492 | 0.007415504 | 15 |
| 6.289254e-07 | RAC2       | Memory LGALS3 | 0.601 | 0.62  | 0.01121311  | 15 |
| 6.493446e-07 | IFI16      | Memory LGALS3 | 0.515 | 0.493 | 0.01157717  | 15 |
| 7.533875e-07 | FXYD5      | Memory LGALS3 | 0.232 | 0.275 | 0.01343215  | 15 |
| 1.04312e-06  | RSRP1      | Memory LGALS3 | 0.305 | 0.33  | 0.01859779  | 15 |
| 1.234684e-06 | SMC6       | Memory LGALS3 | 0.682 | 0.675 | 0.02201319  | 15 |
| 1.594108e-06 | ATP6V1G1   | Memory LGALS3 | 0.371 | 0.406 | 0.02842135  | 15 |
| 2.484973e-06 | SMIM14     | Memory LGALS3 | 0.413 | 0.422 | 0.04430458  | 15 |
| 2.500575e-06 | HIST1H4C   | Memory LGALS3 | 0.188 | 0.231 | 0.04458276  | 15 |
| 2.512766e-06 | ATM        | Memory LGALS3 | 0.289 | 0.332 | 0.04480011  | 15 |
| 2.6062e-06   | RIPOR2     | Memory LGALS3 | 0.157 | 0.194 | 0.04646594  | 15 |
| 3.05675e-06  | DNMT1      | Memory LGALS3 | 0.349 | 0.389 | 0.05449879  | 15 |
| 3.143602e-06 | EVI2B      | Memory LGALS3 | 0.263 | 0.312 | 0.05604727  | 15 |
| 4.300986e-06 | IL16       | Memory LGALS3 | 0.161 | 0.191 | 0.07668228  | 15 |
| 4.772791e-06 | PTTG1      | Memory LGALS3 | 0.356 | 0.404 | 0.08509409  | 15 |
| 6.477597e-06 | MBD4       | Memory LGALS3 | 0.172 | 0.215 | 0.1154891   | 15 |
| 7.41686e-06  | YPEL3      | Memory LGALS3 | 0.784 | 0.762 | 0.1322352   | 15 |
| 9.470407e-06 | CYBA       | Memory LGALS3 | 0.451 | 0.428 | 0.1688479   | 15 |
| 1.397973e-05 | IGLC3      | Memory LGALS3 | 0.153 | 0.193 | 0.2492445   | 15 |
| 1.774047e-05 | FAM30A     | Memory LGALS3 | 0.173 | 0.207 | 0.3162948   | 15 |

|               |          |               |            |       |               |               |         |
|---------------|----------|---------------|------------|-------|---------------|---------------|---------|
| 2.391991e-05  | PRKCB    | Memory LGALS3 | -0.3325246 | 0.821 | 0.8           | 0.4264681     | 15      |
| 4.410723e-05  | LAPTM5   | Memory LGALS3 | -0.3030489 | 0.447 | 0.455         | 0.7863878     | 15      |
| 6.70695e-05   | CTSS     | Memory LGALS3 | -0.4865501 | 0.254 | 0.274         | 1             | 15      |
| 0.0001796233  | KLF2     | Memory LGALS3 | -0.3224465 | 0.292 | 0.313         | 1             | 15      |
| 0.0002432534  | PSIP1    | Memory LGALS3 | -0.3511016 | 0.292 | 0.332         | 1             | 15      |
| 0.0002505228  | GRHPR    | Memory LGALS3 | -0.421483  | 0.495 | 0.498         | 1             | 15      |
| 0.0006601566  | SAT1     | Memory LGALS3 | -0.3121208 | 0.272 | 0.286         | 1             | 15      |
| 0.001462821   | SP110    | Memory LGALS3 | -0.3128535 | 0.256 | 0.267         | 1             | 15      |
| 0.002188118   | HHEX     | Memory LGALS3 | -0.7429264 | 0.802 | 0.714         | 1             | 15      |
| 0.002413521   | HMG2     | Memory LGALS3 | -0.3466325 | 0.326 | 0.338         | 1             | 15      |
| 0.002872321   | IER2     | Memory LGALS3 | -0.3788509 | 0.364 | 0.359         | 1             | 15      |
| 0.006982009   | H2AFV    | Memory LGALS3 | -0.3962154 | 0.901 | 0.85          | 1             | 15      |
| 0             | ATP5MG   | Memory LGALS3 |            |       |               |               |         |
| 0             | 2.581614 | 0.959         | 0.189      | 0     | 16            | RGS13         | GC LM02 |
| 0             | 2.183352 | 0.985         | 0.579      | 0     | 16            | MARCKSL1      | GC LM02 |
| 0             | 2.002801 | 0.853         | 0.187      | 0     | 16            | HMCES         | GC LM02 |
| 0             | 1.692754 | 0.576         | 0.066      | 0     | 16            | LM02          | GC LM02 |
| 0             | 1.54388  | 0.884         | 0.387      | 0     | 16            | BASP1         | GC LM02 |
| 0             | 1.507149 | 0.794         | 0.252      | 0     | 16            | CD22          | GC LM02 |
| 0             | 1.46815  | 0.983         | 0.781      | 0     | 16            | ACTG1         | GC LM02 |
| 0             | 1.396189 | 1             | 0.989      | 0     | 16            | CD74          | GC LM02 |
| 0             | 1.382215 | 0.93          | 0.629      | 0     | 16            | CD53          | GC LM02 |
| 0             | 1.329577 | 0.935         | 0.531      | 0     | 16            | PARP1         | GC LM02 |
| 0             | 1.304886 | 0.987         | 0.763      | 0     | 16            | HMG1          | GC LM02 |
| 0             | 1.209011 | 0.99          | 0.81       | 0     | 16            | COR01A        | GC LM02 |
| 0             | 1.199461 | 0.999         | 0.99       | 0     | 16            | ACTB          | GC LM02 |
| 0             | 1.174964 | 0.996         | 0.932      | 0     | 16            | SERF2         | GC LM02 |
| 0             | 1.137996 | 0.995         | 0.867      | 0     | 16            | ARPC2         | GC LM02 |
| 4.940656e-323 |          | 1.874887      | 0.585      | 0.098 | 8.808696e-319 |               | 16      |
| 3.164805e-317 | VPREB3   | GC LM02       | 1.52353    | 0.859 | 0.328         | 5.642531e-313 | 16      |
| 8.553794e-314 | LRMP     | GC LM02       | 1.887483   | 0.64  | 0.137         | 1.525056e-309 | 16      |
| 3.012054e-312 |          | GC LM02       | 1.525741   | 0.708 | 0.207         | 5.370191e-308 | 16      |
| 3.126002e-310 | NANS     | GC LM02       | 1.439838   | 0.446 | 0.044         | 5.573349e-306 | 16      |
|               | SERPINA9 | GC LM02       |            |       |               |               | BIK     |

|                    |           |       |       |               |               |     |
|--------------------|-----------|-------|-------|---------------|---------------|-----|
| 6.595776e-289      | 1.025733  | 0.996 | 0.945 | 1.175961e-284 | 16            |     |
| HLA-DRA GC LM02    |           |       |       |               |               |     |
| 7.716883e-288      | 1.279949  | 0.923 | 0.544 | 1.375843e-283 | 16            |     |
| TCEA1 GC LM02      |           |       |       |               |               |     |
| 9.472566e-280      | 1.027593  | 0.987 | 0.796 | 1.688864e-275 | 16            |     |
| LAPTM5 GC LM02     |           |       |       |               |               |     |
| 4.321647e-271      | 1.36353   | 0.649 | 0.169 | 7.705065e-267 | 16            | LCK |
| GC LM02            |           |       |       |               |               |     |
| 3.708859e-270      | 1.332432  | 0.568 | 0.101 | 6.612525e-266 | 16            |     |
| AC023590.1 GC LM02 |           |       |       |               |               |     |
| 1.701626e-258      | 1.397726  | 0.752 | 0.223 | 3.033829e-254 | 16            |     |
| UBE2J1 GC LM02     |           |       |       |               |               |     |
| 1.588123e-255      | 1.456434  | 0.62  | 0.123 | 2.831464e-251 | 16            |     |
| NEIL1 GC LM02      |           |       |       |               |               |     |
| 5.042804e-245      | 1.091001  | 0.349 | 0.039 | 8.990816e-241 | 16            |     |
| CCDC144A GC LM02   |           |       |       |               |               |     |
| 1.851681e-243      | 1.283715  | 0.548 | 0.111 | 3.301363e-239 | 16            |     |
| VNN2 GC LM02       |           |       |       |               |               |     |
| 1.846377e-240      | 0.9983265 |       | 0.29  | 0.023         | 3.291905e-236 | 16  |
| CAMK1 GC LM02      |           |       |       |               |               |     |
| 3.821673e-238      | 1.355758  | 0.715 | 0.226 | 6.813661e-234 | 16            |     |
| GCHFR GC LM02      |           |       |       |               |               |     |
| 1.858581e-233      | 1.10891   | 0.959 | 0.672 | 3.313663e-229 | 16            |     |
| HLA-DMA GC LM02    |           |       |       |               |               |     |
| 9.949966e-233      | -1.99259  | 0.231 | 0.709 | 1.773979e-228 | 16            |     |
| EMP3 GC LM02       |           |       |       |               |               |     |
| 1.474034e-230      | 0.9206038 |       | 0.993 | 0.886         | 2.628055e-226 | 16  |
| GAPDH GC LM02      |           |       |       |               |               |     |
| 2.346833e-230      | 1.283049  | 0.613 | 0.178 | 4.184168e-226 | 16            |     |
| PRPSAP2 GC LM02    |           |       |       |               |               |     |
| 1.022625e-228      | 1.408814  | 0.488 | 0.107 | 1.823238e-224 | 16            |     |
| GMDS GC LM02       |           |       |       |               |               |     |
| 2.545914e-226      | 1.414979  | 0.643 | 0.18  | 4.539111e-222 | 16            |     |
| DAAM1 GC LM02      |           |       |       |               |               |     |
| 4.12744e-222       | 1.195997  | 0.784 | 0.318 | 7.358812e-218 | 16            |     |
| RFTN1 GC LM02      |           |       |       |               |               |     |
| 8.429295e-222      | 0.9365367 |       | 0.985 | 0.848         | 1.502859e-217 | 16  |
| ATP5MG GC LM02     |           |       |       |               |               |     |
| 3.921473e-218      | 1.051396  | 0.974 | 0.757 | 6.991594e-214 | 16            |     |
| CYBA GC LM02       |           |       |       |               |               |     |
| 7.90205e-218       | 1.085012  | 0.411 | 0.063 | 1.408856e-213 | 16            |     |
| RPRD1B GC LM02     |           |       |       |               |               |     |
| 1.167897e-216      | 1.347131  | 0.51  | 0.112 | 2.082243e-212 | 16            | LPP |
| GC LM02            |           |       |       |               |               |     |
| 5.041398e-215      | 0.833889  | 0.989 | 0.897 | 8.988309e-211 | 16            |     |
| PFN1 GC LM02       |           |       |       |               |               |     |
| 8.207915e-210      | 1.062056  | 0.937 | 0.691 | 1.463389e-205 | 16            |     |
| HLA-DQB1 GC LM02   |           |       |       |               |               |     |
| 1.163096e-206      | 1.030932  | 0.295 | 0.025 | 2.073684e-202 | 16            |     |
| DHRS9 GC LM02      |           |       |       |               |               |     |

|                      |            |       |       |               |               |    |
|----------------------|------------|-------|-------|---------------|---------------|----|
| 3.618379e-205        | 1.008861   | 0.931 | 0.615 | 6.451208e-201 | 16            |    |
| ARPC1B GC LM02       |            |       |       |               |               |    |
| 1.189198e-204        | 1.272946   | 0.769 | 0.321 | 2.120221e-200 | 16            |    |
| GRHPR GC LM02        |            |       |       |               |               |    |
| 1.63087e-203         | 1.096687   | 0.936 | 0.646 | 2.907678e-199 | 16            |    |
| HLA-DQA1 GC LM02     |            |       |       |               |               |    |
| 7.655088e-201        | 1.197597   | 0.586 | 0.159 | 1.364826e-196 | 16            |    |
| SEL1L3 GC LM02       |            |       |       |               |               |    |
| 1.063334e-199        | 1.365848   | 0.956 | 0.749 | 1.895819e-195 | 16            |    |
| HLA-DRB1 GC LM02     |            |       |       |               |               |    |
| 2.121639e-197        | 1.178776   | 0.73  | 0.279 | 3.782671e-193 | 16            |    |
| BCAS4 GC LM02        |            |       |       |               |               |    |
| 3.269821e-194        | 1.061202   | 0.402 | 0.065 | 5.829764e-190 | 16            |    |
| S1PR2 GC LM02        |            |       |       |               |               |    |
| 2.601109e-193        | -1.977412  |       | 0.117 | 0.553         | 4.637517e-189 | 16 |
| CCR7 GC LM02         |            |       |       |               |               |    |
| 1.848144e-192        | 1.193942   | 0.767 | 0.292 | 3.295055e-188 | 16            |    |
| BCL7A GC LM02        |            |       |       |               |               |    |
| 1.256802e-191        | 1.125332   | 0.564 | 0.156 | 2.240753e-187 | 16            |    |
| DEF8 GC LM02         |            |       |       |               |               |    |
| 2.141382e-189        | 1.101447   | 0.443 | 0.095 | 3.817871e-185 | 16            |    |
| SEMA4A GC LM02       |            |       |       |               |               |    |
| 7.153894e-184        | -1.170246  |       | 0.715 | 0.911         | 1.275468e-179 | 16 |
| IGHM GC LM02         |            |       |       |               |               |    |
| 1.486304e-183        | 0.9782756  |       | 0.951 | 0.72          | 2.649932e-179 | 16 |
| LIMD2 GC LM02        |            |       |       |               |               |    |
| 8.814098e-182        | 0.8748059  |       | 0.322 | 0.049         | 1.571466e-177 | 16 |
| BORCS8-MEF2B GC LM02 |            |       |       |               |               |    |
| 2.071686e-181        | 1.185021   | 0.422 | 0.095 | 3.69361e-177  | 16            |    |
| ALDH2 GC LM02        |            |       |       |               |               |    |
| 2.492602e-181        | 1.305756   | 0.638 | 0.232 | 4.444061e-177 | 16            |    |
| RGS1 GC LM02         |            |       |       |               |               |    |
| 9.496593e-177        | 1.19062    | 0.563 | 0.152 | 1.693147e-172 | 16            |    |
| SUSD3 GC LM02        |            |       |       |               |               |    |
| 4.265919e-176        | 0.8477369  |       | 0.96  | 0.811         | 7.605707e-172 | 16 |
| HLA-DPA1 GC LM02     |            |       |       |               |               |    |
| 3.518108e-175        | 0.6779962  |       | 0.217 | 0.015         | 6.272434e-171 | 16 |
| CAMK2B GC LM02       |            |       |       |               |               |    |
| 5.698635e-175        | 1.119471   | 0.644 | 0.197 | 1.01601e-170  | 16            |    |
| EAF2 GC LM02         |            |       |       |               |               |    |
| 3.347862e-174        | -0.6806524 |       | 1     | 1             | 5.968903e-170 | 16 |
| RPL41 GC LM02        |            |       |       |               |               |    |
| 1.323588e-173        | 1.118706   | 0.78  | 0.366 | 2.359826e-169 | 16            |    |
| ACADM GC LM02        |            |       |       |               |               |    |
| 4.774372e-171        | 0.8679987  |       | 0.987 | 0.853         | 8.512228e-167 | 16 |
| CD79B GC LM02        |            |       |       |               |               |    |
| 1.883908e-170        | 0.8074455  |       | 0.254 | 0.022         | 3.35882e-166  | 16 |
| HTR3A GC LM02        |            |       |       |               |               |    |
| 2.14393e-168         | -0.8189858 |       | 0.992 | 0.999         | 3.822413e-164 | 16 |
| RPS29 GC LM02        |            |       |       |               |               |    |



|               |            |       |       |               |               |
|---------------|------------|-------|-------|---------------|---------------|
| 8.106025e-164 | 1.167264   | 0.567 | 0.159 | 1.445223e-159 | 16            |
| CCDC88A       | GC         | LM02  |       |               |               |
| 3.632265e-163 | 1.131841   | 0.76  | 0.409 | 6.475966e-159 | 16            |
| METAP2        | GC         | LM02  |       |               |               |
| 4.427496e-160 | 0.9146173  |       | 0.846 | 0.393         | 7.893782e-156 |
| JCHAIN        | GC         | LM02  |       |               |               |
| 9.44985e-160  | 0.7684856  |       | 0.277 | 0.034         | 1.684814e-155 |
| TOX           | GC         | LM02  |       |               |               |
| 1.646509e-159 | 0.9547084  |       | 0.831 | 0.451         | 2.935561e-155 |
| SWAP70        | GC         | LM02  |       |               |               |
| 1.418436e-158 | 0.8527262  |       | 0.946 | 0.688         | 2.528929e-154 |
| EZR           | GC         | LM02  |       |               |               |
| 6.088079e-156 | 0.7944851  |       | 0.985 | 0.879         | 1.085444e-151 |
| MS4A1         | GC         | LM02  |       |               |               |
| 4.404632e-155 | -0.9903791 |       | 0.994 | 0.996         | 7.853018e-151 |
| RPS12         | GC         | LM02  |       |               |               |
| 2.895472e-154 | 1.047467   | 0.497 | 0.11  | 5.162337e-150 | 16            |
| CD38          | GC         | LM02  |       |               |               |
| 2.278336e-152 | 1.010584   | 0.898 | 0.598 | 4.062045e-148 | 16            |
| DYNLL1        | GC         | LM02  |       |               |               |
| 2.382734e-152 | -1.913921  |       | 0.201 | 0.579         | 4.248177e-148 |
| VIM           | GC         | LM02  |       |               |               |
| 1.089416e-151 | 1.038692   | 0.736 | 0.357 | 1.942319e-147 | 16            |
| SNAP23        | GC         | LM02  |       |               |               |
| 4.194838e-151 | 1.052219   | 0.695 | 0.265 | 7.478977e-147 | 16            |
| NCF1          | GC         | LM02  |       |               |               |
| 4.91688e-149  | 0.8028258  |       | 0.642 | 0.501         | 8.766306e-145 |
| HLA-DRB5      | GC         | LM02  |       |               |               |
| 1.705164e-147 | 0.7357103  |       | 0.99  | 0.863         | 3.040137e-143 |
| CD79A         | GC         | LM02  |       |               |               |
| 2.565266e-147 | 0.8883528  |       | 0.965 | 0.648         | 4.573612e-143 |
| TCL1A         | GC         | LM02  |       |               |               |
| 9.456036e-146 | 0.9512982  |       | 0.733 | 0.366         | 1.685917e-141 |
| LCP1          | GC         | LM02  |       |               |               |
| 1.560336e-145 | 0.9812358  |       | 0.617 | 0.241         | 2.781923e-141 |
| SH3KBP1       | GC         | LM02  |       |               |               |
| 3.66665e-145  | 1.01149    | 0.708 | 0.319 | 6.537271e-141 | 16            |
| GYPC          | GC         | LM02  |       |               |               |
| 7.522073e-144 | 0.7773384  |       | 0.29  | 0.046         | 1.34111e-139  |
| ASB13         | GC         | LM02  |       |               |               |
| 9.856347e-143 | 0.6232487  |       | 0.991 | 0.917         | 1.757288e-138 |
| CFL1          | GC         | LM02  |       |               |               |
| 1.940317e-142 | 0.946333   | 0.653 | 0.299 | 3.459391e-138 | 16            |
| FERMT3        | GC         | LM02  |       |               |               |
| 3.368115e-142 | 0.880324   | 0.865 | 0.55  | 6.005013e-138 | 16            |
| ATP5IF1       | GC         | LM02  |       |               |               |
| 1.047536e-140 | 0.6847679  |       | 0.974 | 0.867         | 1.867652e-136 |
| ARPC3         | GC         | LM02  |       |               |               |
| 3.181064e-136 | 0.7738338  |       | 0.889 | 0.614         | 5.67152e-132  |
| ACTR3         | GC         | LM02  |       |               |               |

|               |                |       |               |               |    |
|---------------|----------------|-------|---------------|---------------|----|
| 6.228832e-135 | 0.9483144      | 0.482 | 0.132         | 1.110538e-130 | 16 |
| S0CS1         | GC LM02        |       |               |               |    |
| 7.423328e-134 | 0.7907256      | 0.908 | 0.67          | 1.323505e-129 | 16 |
| ATP6V1G1      | GC LM02        |       |               |               |    |
| 8.881869e-134 | 0.9216052      | 0.468 | 0.133         | 1.583549e-129 | 16 |
| AIM2          | GC LM02        |       |               |               |    |
| 2.368658e-133 | 0.868929 0.4   | 0.103 | 4.22308e-129  | 16            |    |
| ITGB2         | GC LM02        |       |               |               |    |
| 2.895154e-133 | 0.7989834      | 0.905 | 0.647         | 5.16177e-129  | 16 |
| YWHAB         | GC LM02        |       |               |               |    |
| 1.059863e-132 | 0.9690917      | 0.634 | 0.258         | 1.88963e-128  | 16 |
| ALOX5AP       | GC LM02        |       |               |               |    |
| 2.90714e-132  | 0.565989 1     | 0.998 | 5.183141e-128 | 16            |    |
| TMSB4X        | GC LM02        |       |               |               |    |
| 5.244121e-132 | 0.5432193      | 0.996 | 0.96          | 9.349743e-128 | 16 |
| OAZ1          | GC LM02        |       |               |               |    |
| 8.702914e-132 | 1.022564 0.456 | 0.131 | 1.551643e-127 | 16            |    |
| SIT1          | GC LM02        |       |               |               |    |
| 3.481689e-129 | 0.9557158      | 0.324 | 0.057         | 6.207503e-125 | 16 |
| HOPX          | GC LM02        |       |               |               |    |
| 1.397102e-127 | 0.7416738      | 0.306 | 0.066         | 2.490894e-123 | 16 |
| NEK6          | GC LM02        |       |               |               |    |
| 7.065169e-127 | 0.7310842      | 0.286 | 0.048         | 1.259649e-122 | 16 |
| A4GALT        | GC LM02        |       |               |               |    |
| 4.182277e-126 | 0.8803618      | 0.709 | 0.357         | 7.456581e-122 | 16 |
| TERF2IP       | GC LM02        |       |               |               |    |
| 9.913983e-125 | -1.303748      | 0.255 | 0.584         | 1.767564e-120 | 16 |
| SARAF         | GC LM02        |       |               |               |    |
| 2.988643e-124 | -0.578565      | 1     | 0.999         | 5.328452e-120 | 16 |
| RPLP1         | GC LM02        |       |               |               |    |
| 2.375131e-122 | 0.7923176      | 0.945 | 0.771         | 4.23462e-118  | 16 |
| HLA-DPB1      | GC LM02        |       |               |               |    |
| 1.19916e-121  | 0.8331813      | 0.914 | 0.619         | 2.137982e-117 | 16 |
| HLA-DMB       | GC LM02        |       |               |               |    |
| 9.168256e-121 | 0.6074069      | 0.981 | 0.9           | 1.634608e-116 | 16 |
| MYL6          | GC LM02        |       |               |               |    |
| 9.186071e-121 | -1.954723      | 0.148 | 0.472         | 1.637785e-116 | 16 |
| S100A6        | GC LM02        |       |               |               |    |
| 1.743667e-119 | -0.7032837     | 0.997 | 0.999         | 3.108785e-115 | 16 |
| RPLP2         | GC LM02        |       |               |               |    |
| 2.600382e-119 | 0.5667841      | 0.996 | 0.938         | 4.636222e-115 | 16 |
| H3F3A         | GC LM02        |       |               |               |    |
| 4.062046e-118 | 0.8473237      | 0.879 | 0.593         | 7.242222e-114 | 16 |
| PRDX1         | GC LM02        |       |               |               |    |
| 9.587383e-118 | 0.8795571      | 0.642 | 0.275         | 1.709335e-113 | 16 |
| LAT2          | GC LM02        |       |               |               |    |
| 1.462952e-116 | -0.8460017     | 0.949 | 0.983         | 2.608296e-112 | 16 |
| RPS21         | GC LM02        |       |               |               |    |
| 1.417458e-115 | -0.7554766     | 1     | 0.998         | 2.527185e-111 | 16 |
| B2M           | GC LM02        |       |               |               |    |

|               |                |       |               |               |    |
|---------------|----------------|-------|---------------|---------------|----|
| 1.526295e-115 | 0.7881464      | 0.32  | 0.069         | 2.721231e-111 | 16 |
| PAG1          | GC LM02        |       |               |               |    |
| 5.1859e-115   | 0.8473247      | 0.763 | 0.411         | 9.245941e-111 | 16 |
| CTSH          | GC LM02        |       |               |               |    |
| 2.919115e-114 | 0.7226677      | 0.282 | 0.058         | 5.20449e-110  | 16 |
| FAM129A       | GC LM02        |       |               |               |    |
| 5.304513e-114 | 0.866936 0.489 | 0.175 | 9.457417e-110 | 16            |    |
| RASGRP3       | GC LM02        |       |               |               |    |
| 1.469797e-113 | 0.7623021      | 0.322 | 0.074         | 2.620502e-109 | 16 |
| MYO1E         | GC LM02        |       |               |               |    |
| 8.218613e-113 | 0.9089034      | 0.414 | 0.099         | 1.465297e-108 | 16 |
| HRK           | GC LM02        |       |               |               |    |
| 3.714798e-112 | 0.8335706      | 0.771 | 0.422         | 6.623113e-108 | 16 |
| IRF8          | GC LM02        |       |               |               |    |
| 9.200743e-112 | 0.7942117      | 0.741 | 0.407         | 1.6404e-107   | 16 |
| HDAC1         | GC LM02        |       |               |               |    |
| 2.305849e-111 | 0.7494829      | 0.869 | 0.577         | 4.111098e-107 | 16 |
| ANP32B        | GC LM02        |       |               |               |    |
| 5.645206e-111 | 0.8630417      | 0.779 | 0.446         | 1.006484e-106 | 16 |
| PTPRC         | GC LM02        |       |               |               |    |
| 1.835692e-109 | 0.9393062      | 0.855 | 0.526         | 3.272855e-105 | 16 |
| ISG20         | GC LM02        |       |               |               |    |
| 2.744227e-109 | 0.8658028      | 0.599 | 0.253         | 4.892682e-105 | 16 |
| CCDC69        | GC LM02        |       |               |               |    |
| 1.030994e-108 | -0.6386458     | 0.996 | 0.999         | 1.83816e-104  | 16 |
| RPL13         | GC LM02        |       |               |               |    |
| 3.079804e-108 | 0.8242511      | 0.62  | 0.287         | 5.490982e-104 | 16 |
| LYPLA1        | GC LM02        |       |               |               |    |
| 3.331593e-108 | -1.301645      | 0.073 | 0.357         | 5.939897e-104 | 16 |
| LY6E          | GC LM02        |       |               |               |    |
| 5.164423e-108 | 0.9090315      | 0.493 | 0.145         | 9.207651e-104 | 16 |
| CD81          | GC LM02        |       |               |               |    |
| 2.752608e-105 | 0.8134934      | 0.773 | 0.432         | 4.907625e-101 | 16 |
| RHOH          | GC LM02        |       |               |               |    |
| 3.772634e-105 | 0.877999 0.519 | 0.178 | 6.726229e-101 | 16            |    |
| P2RX5         | GC LM02        |       |               |               |    |
| 6.807477e-105 | 0.9066492      | 0.648 | 0.296         | 1.213705e-100 | 16 |
| CD27          | GC LM02        |       |               |               |    |
| 1.506604e-104 | 0.7764175      | 0.394 | 0.098         | 2.686125e-100 | 16 |
| SCIMP         | GC LM02        |       |               |               |    |
| 1.797594e-104 | 0.8155964      | 0.386 | 0.117         | 3.204931e-100 | 16 |
| SPATS2        | GC LM02        |       |               |               |    |
| 2.715754e-104 | 0.7559411      | 0.396 | 0.126         | 4.841917e-100 | 16 |
| PRKCD         | GC LM02        |       |               |               |    |
| 5.202393e-104 | 0.8235386      | 0.697 | 0.353         | 9.275346e-100 | 16 |
| TPD52         | GC LM02        |       |               |               |    |
| 1.2788e-103   | 0.8312396      | 0.604 | 0.266         | 2.279972e-99  | 16 |
| POU2AF1       | GC LM02        |       |               |               |    |
| 1.507309e-103 | 0.8482477      | 0.436 | 0.14          | 2.687381e-99  | 16 |
| SEC14L1       | GC LM02        |       |               |               |    |

|               |                |       |       |              |    |
|---------------|----------------|-------|-------|--------------|----|
| 3.192942e-103 | 0.8432346      | 0.393 | 0.105 | 5.692697e-99 | 16 |
| CPNE5         | GC LM02        |       |       |              |    |
| 1.164822e-102 | 0.7354581      | 0.321 | 0.072 | 2.076762e-98 | 16 |
| KLHL6         | GC LM02        |       |       |              |    |
| 1.32991e-101  | 0.8030381      | 0.368 | 0.101 | 2.371097e-97 | 16 |
| E2F5          | GC LM02        |       |       |              |    |
| 1.531416e-101 | 0.5905319      | 0.214 | 0.036 | 2.730362e-97 | 16 |
| EEDP1         | GC LM02        |       |       |              |    |
| 2.701118e-101 | 0.8166574      | 0.599 | 0.251 | 4.815823e-97 | 16 |
| SYNE2         | GC LM02        |       |       |              |    |
| 3.750604e-101 | 0.790687 0.44  | 0.151 |       | 6.686952e-97 | 16 |
| SMIM20        | GC LM02        |       |       |              |    |
| 4.743998e-101 | 0.498226 0.154 | 0.013 |       | 8.458075e-97 | 16 |
| BTNL9         | GC LM02        |       |       |              |    |
| 6.094686e-100 | 0.7455074      | 0.83  | 0.528 | 1.086622e-95 | 16 |
| SRSF9         | GC LM02        |       |       |              |    |
| 8.356517e-100 | -0.6845776     | 0.996 | 0.995 | 1.489883e-95 | 16 |
| RPS25         | GC LM02        |       |       |              |    |
| 1.216592e-99  | 0.7975824      | 0.541 | 0.217 | 2.169062e-95 | 16 |
| SIAH2         | GC LM02        |       |       |              |    |
| 1.995708e-99  | 0.6279841      | 0.199 | 0.029 | 3.558148e-95 | 16 |
| GPR137B       | GC LM02        |       |       |              |    |
| 2.084563e-99  | 0.6373493      | 0.246 | 0.052 | 3.716568e-95 | 16 |
| BFSP2         | GC LM02        |       |       |              |    |
| 2.10199e-99   | 0.7656458      | 0.689 | 0.37  | 3.747637e-95 | 16 |
| ZFAND6        | GC LM02        |       |       |              |    |
| 2.214616e-99  | 0.6455053      | 0.959 | 0.772 | 3.948439e-95 | 16 |
| ARHGDIB       | GC LM02        |       |       |              |    |
| 5.572835e-99  | -0.5984438     | 0.998 | 0.999 | 9.935808e-95 | 16 |
| RPS27A        | GC LM02        |       |       |              |    |
| 1.061512e-98  | 0.8103441      | 0.355 | 0.107 | 1.892569e-94 | 16 |
| PIP4K2A       | GC LM02        |       |       |              |    |
| 2.792534e-97  | 0.7887157      | 0.609 | 0.27  | 4.978809e-93 | 16 |
| STK17B        | GC LM02        |       |       |              |    |
| 5.106562e-96  | 0.6746459      | 0.284 | 0.058 | 9.104489e-92 | 16 |
| ZNF608        | GC LM02        |       |       |              |    |
| 8.830934e-96  | -0.5596521     | 1     | 0.999 | 1.574467e-91 | 16 |
| RPL13A        | GC LM02        |       |       |              |    |
| 7.54352e-95   | -1.198873      | 0.243 | 0.518 | 1.344934e-90 | 16 |
| BANK1         | GC LM02        |       |       |              |    |
| 3.331297e-94  | 0.7918963      | 0.513 | 0.18  | 5.93937e-90  | 16 |
| HLA-D0B       | GC LM02        |       |       |              |    |
| 3.875258e-94  | 0.7822749      | 0.509 | 0.186 | 6.909197e-90 | 16 |
| DNMT1         | GC LM02        |       |       |              |    |
| 3.936893e-94  | 0.6791445      | 0.308 | 0.078 | 7.019087e-90 | 16 |
| BPNT1         | GC LM02        |       |       |              |    |
| 8.657374e-94  | 0.7840735      | 0.701 | 0.367 | 1.543523e-89 | 16 |
| PTP4A2        | GC LM02        |       |       |              |    |
| 9.438725e-94  | 0.6640914      | 0.315 | 0.076 | 1.68283e-89  | 16 |
| VGLL4         | GC LM02        |       |       |              |    |

|              |                |       |              |              |    |
|--------------|----------------|-------|--------------|--------------|----|
| 1.161754e-93 | 0.7936284      | 0.517 | 0.227        | 2.071291e-89 | 16 |
| CHCHD10      | GC LM02        |       |              |              |    |
| 2.771257e-93 | 0.7768186      | 0.643 | 0.289        | 4.940874e-89 | 16 |
| GGA2         | GC LM02        |       |              |              |    |
| 4.75427e-93  | 0.7734089      | 0.478 | 0.198        | 8.476388e-89 | 16 |
| MTMR14       | GC LM02        |       |              |              |    |
| 4.901351e-93 | 0.754398 0.402 | 0.122 | 8.738619e-89 | 16           |    |
| RABGAP1L     | GC LM02        |       |              |              |    |
| 7.216741e-93 | -1.290053      | 0.091 | 0.359        | 1.286673e-88 | 16 |
| TXNIP        | GC LM02        |       |              |              |    |
| 8.26386e-93  | 0.7598893      | 0.708 | 0.386        | 1.473364e-88 | 16 |
| SYPL1        | GC LM02        |       |              |              |    |
| 1.298883e-92 | 0.662637 0.277 | 0.058 | 2.315778e-88 | 16           |    |
| PITPNC1      | GC LM02        |       |              |              |    |
| 2.496061e-92 | 1.040397 0.482 | 0.179 | 4.450228e-88 | 16           |    |
| RGS2         | GC LM02        |       |              |              |    |
| 4.851258e-92 | 0.476821 0.155 | 0.018 | 8.649308e-88 | 16           |    |
| SPRED2       | GC LM02        |       |              |              |    |
| 6.992491e-92 | 0.828273 0.515 | 0.212 | 1.246691e-87 | 16           |    |
| LY86         | GC LM02        |       |              |              |    |
| 7.084026e-92 | -0.6180858     | 0.999 | 0.999        | 1.263011e-87 | 16 |
| RPL32        | GC LM02        |       |              |              |    |
| 3.994012e-91 | 0.6673 0.283   | 0.077 | 7.120924e-87 | 16           |    |
| GPR160       | GC LM02        |       |              |              |    |
| 1.005116e-90 | 0.7556869      | 0.566 | 0.24         | 1.792022e-86 | 16 |
| CSK          | GC LM02        |       |              |              |    |
| 1.116547e-90 | 0.7729825      | 0.555 | 0.243        | 1.990692e-86 | 16 |
| WIPF1        | GC LM02        |       |              |              |    |
| 1.781642e-90 | 0.7404095      | 0.67  | 0.346        | 3.176489e-86 | 16 |
| DBNL         | GC LM02        |       |              |              |    |
| 1.956313e-90 | -0.601347      | 1     | 0.999        | 3.48791e-86  | 16 |
| RPL34        | GC LM02        |       |              |              |    |
| 1.996072e-90 | -0.9465735     | 0.321 | 0.613        | 3.558797e-86 | 16 |
| IGHD         | GC LM02        |       |              |              |    |
| 2.057286e-90 | 0.5393502      | 0.185 | 0.03         | 3.667935e-86 | 16 |
| PDGFD        | GC LM02        |       |              |              |    |
| 3.329146e-90 | -1.178184      | 0.116 | 0.389        | 5.935534e-86 | 16 |
| CD44         | GC LM02        |       |              |              |    |
| 4.520764e-90 | 0.5113351      | 0.169 | 0.025        | 8.060069e-86 | 16 |
| LINC00877    | GC LM02        |       |              |              |    |
| 7.843263e-90 | -0.9736702     | 0.841 | 0.918        | 1.398375e-85 | 16 |
| EEF1B2       | GC LM02        |       |              |              |    |
| 4.549623e-89 | 0.6381603      | 0.911 | 0.694        | 8.111524e-85 | 16 |
| CCNI         | GC LM02        |       |              |              |    |
| 4.759498e-89 | 0.5441398      | 0.21  | 0.039        | 8.485709e-85 | 16 |
| ACY3         | GC LM02        |       |              |              |    |
| 1.487696e-88 | 0.8260065      | 0.536 | 0.232        | 2.652413e-84 | 16 |
| NCF4         | GC LM02        |       |              |              |    |
| 9.790929e-88 | 0.6569327      | 0.795 | 0.516        | 1.745625e-83 | 16 |
| SELENOT      | GC LM02        |       |              |              |    |

|              |                |       |              |              |    |
|--------------|----------------|-------|--------------|--------------|----|
| 1.053089e-87 | 0.7413041      | 0.352 | 0.111        | 1.877552e-83 | 16 |
| ABI3         | GC LM02        |       |              |              |    |
| 2.548054e-87 | 0.7610975      | 0.484 | 0.168        | 4.542925e-83 | 16 |
| PDIA4        | GC LM02        |       |              |              |    |
| 4.594353e-87 | 0.7024225      | 0.325 | 0.09         | 8.191271e-83 | 16 |
| FAM76B       | GC LM02        |       |              |              |    |
| 5.547781e-86 | 0.7609913      | 0.428 | 0.157        | 9.891138e-82 | 16 |
| LYPLAL1      | GC LM02        |       |              |              |    |
| 6.937993e-86 | 0.7129859      | 0.696 | 0.376        | 1.236975e-81 | 16 |
| SMARCB1      | GC LM02        |       |              |              |    |
| 2.812553e-85 | 0.9634881      | 0.264 | 0.066        | 5.014501e-81 | 16 |
| RASSF6       | GC LM02        |       |              |              |    |
| 5.238501e-85 | 0.686963 0.755 | 0.452 | 9.339724e-81 | 16           |    |
| RAP1B        | GC LM02        |       |              |              |    |
| 3.338743e-84 | 0.7691804      | 0.527 | 0.22         | 5.952645e-80 | 16 |
| UBE2G1       | GC LM02        |       |              |              |    |
| 3.47623e-84  | 0.4255619      | 0.134 | 0.018        | 6.197771e-80 | 16 |
| NLRP4        | GC LM02        |       |              |              |    |
| 4.438353e-84 | -0.5810314     | 0.999 | 0.998        | 7.913139e-80 | 16 |
| RPL18A       | GC LM02        |       |              |              |    |
| 4.581347e-84 | 0.7757423      | 0.56  | 0.283        | 8.168083e-80 | 16 |
| C7orf50      | GC LM02        |       |              |              |    |
| 9.854143e-84 | 0.6189857      | 0.873 | 0.619        | 1.756895e-79 | 16 |
| LAMTOR5      | GC LM02        |       |              |              |    |
| 1.142115e-83 | 0.7094227      | 0.374 | 0.129        | 2.036276e-79 | 16 |
| RAB9A        | GC LM02        |       |              |              |    |
| 2.239102e-83 | 0.7116018      | 0.659 | 0.331        | 3.992095e-79 | 16 |
| STK17A       | GC LM02        |       |              |              |    |
| 1.222202e-82 | 0.7614631      | 0.516 | 0.233        | 2.179064e-78 | 16 |
| ZBTB80S      | GC LM02        |       |              |              |    |
| 1.508311e-82 | 0.7354287      | 0.559 | 0.258        | 2.689167e-78 | 16 |
| RBM6         | GC LM02        |       |              |              |    |
| 1.01966e-81  | 0.6669108      | 0.338 | 0.103        | 1.817952e-77 | 16 |
| OGG1         | GC LM02        |       |              |              |    |
| 1.972985e-81 | 0.6129665      | 0.227 | 0.047        | 3.517635e-77 | 16 |
| CPM          | GC LM02        |       |              |              |    |
| 2.250498e-81 | 0.6187784      | 0.857 | 0.578        | 4.012412e-77 | 16 |
| ATP5MC3      | GC LM02        |       |              |              |    |
| 1.059304e-80 | -0.8413986     | 0.953 | 0.969        | 1.888633e-76 | 16 |
| MT-ND3       | GC LM02        |       |              |              |    |
| 1.315551e-80 | 0.6172713      | 0.253 | 0.063        | 2.345496e-76 | 16 |
| TEX9         | GC LM02        |       |              |              |    |
| 2.114827e-80 | 0.7184785      | 0.327 | 0.092        | 3.770525e-76 | 16 |
| STAG3        | GC LM02        |       |              |              |    |
| 2.118619e-80 | 0.6922177      | 0.332 | 0.103        | 3.777286e-76 | 16 |
| PHF6         | GC LM02        |       |              |              |    |
| 2.504319e-80 | 0.5550016      | 0.907 | 0.692        | 4.46495e-76  | 16 |
| RHOA         | GC LM02        |       |              |              |    |
| 4.618058e-80 | 0.6240365      | 0.245 | 0.061        | 8.233536e-76 | 16 |
| QPCT         | GC LM02        |       |              |              |    |

|              |                |       |              |              |    |
|--------------|----------------|-------|--------------|--------------|----|
| 9.632068e-80 | 0.7063386      | 0.658 | 0.348        | 1.717301e-75 | 16 |
| CD19         | GC LM02        |       |              |              |    |
| 6.64999e-79  | -0.6099198     | 0.991 | 0.993        | 1.185627e-74 | 16 |
| RPS5         | GC LM02        |       |              |              |    |
| 7.380971e-79 | -1.02274 0.038 | 0.215 | 1.315953e-74 | 16           |    |
| PLAC8        | GC LM02        |       |              |              |    |
| 1.109473e-78 | 0.6495489      | 0.274 | 0.064        | 1.978079e-74 | 16 |
| SNTA1        | GC LM02        |       |              |              |    |
| 1.336833e-78 | -0.606417      | 0.998 | 0.999        | 2.38344e-74  | 16 |
| RPL39        | GC LM02        |       |              |              |    |
| 1.828855e-78 | 0.5943355      | 0.287 | 0.086        | 3.260665e-74 | 16 |
| ZBTB38       | GC LM02        |       |              |              |    |
| 2.095072e-78 | 0.7075745      | 0.411 | 0.141        | 3.735304e-74 | 16 |
| SH2B2        | GC LM02        |       |              |              |    |
| 3.59683e-78  | -1.15504 0.169 | 0.432 | 6.412789e-74 | 16           |    |
| PLP2         | GC LM02        |       |              |              |    |
| 4.273519e-78 | -1.296108      | 0.592 | 0.754        | 7.619257e-74 | 16 |
| CXCR4        | GC LM02        |       |              |              |    |
| 1.073713e-77 | 0.7163833      | 0.524 | 0.258        | 1.914323e-73 | 16 |
| VASP         | GC LM02        |       |              |              |    |
| 1.240067e-77 | 0.7694604      | 0.339 | 0.089        | 2.210915e-73 | 16 |
| WDR66        | GC LM02        |       |              |              |    |
| 1.777549e-77 | 0.5745737      | 0.891 | 0.652        | 3.169193e-73 | 16 |
| SLC25A5      | GC LM02        |       |              |              |    |
| 2.853648e-77 | -0.6108491     | 0.995 | 0.998        | 5.087769e-73 | 16 |
| RPL11        | GC LM02        |       |              |              |    |
| 1.384691e-76 | 0.636917 0.559 | 0.182 | 2.468766e-72 | 16           |    |
| PTTG1        | GC LM02        |       |              |              |    |
| 2.887002e-76 | 0.6079351      | 0.791 | 0.53         | 5.147236e-72 | 16 |
| CAP1         | GC LM02        |       |              |              |    |
| 4.729173e-76 | 0.6867614      | 0.709 | 0.419        | 8.431642e-72 | 16 |
| CD40         | GC LM02        |       |              |              |    |
| 1.500864e-75 | 0.5570385      | 0.913 | 0.702        | 2.67589e-71  | 16 |
| NDUFA4       | GC LM02        |       |              |              |    |
| 2.044414e-75 | 0.6971802      | 0.507 | 0.226        | 3.644985e-71 | 16 |
| MTF2         | GC LM02        |       |              |              |    |
| 2.072785e-75 | 0.7361187      | 0.507 | 0.227        | 3.695568e-71 | 16 |
| CPNE3        | GC LM02        |       |              |              |    |
| 4.369464e-75 | 0.3740198      | 0.113 | 0.012        | 7.790318e-71 | 16 |
| RGS20        | GC LM02        |       |              |              |    |
| 5.696259e-75 | 0.7000833      | 0.508 | 0.226        | 1.015586e-70 | 16 |
| ZNF581       | GC LM02        |       |              |              |    |
| 1.708001e-74 | 0.4952218      | 0.173 | 0.028        | 3.045195e-70 | 16 |
| PTAFR        | GC LM02        |       |              |              |    |
| 7.085276e-74 | 0.7165425      | 0.49  | 0.202        | 1.263234e-69 | 16 |
| GLRX         | GC LM02        |       |              |              |    |
| 8.730156e-74 | -0.8885182     | 0.942 | 0.961        | 1.556499e-69 | 16 |
| MT-ND2       | GC LM02        |       |              |              |    |
| 8.787707e-74 | 0.6857194      | 0.316 | 0.086        | 1.56676e-69  | 16 |
| GCSAM        | GC LM02        |       |              |              |    |

|              |            |       |       |              |              |
|--------------|------------|-------|-------|--------------|--------------|
| 9.339965e-74 | 0.831007   | 0.745 | 0.483 | 1.665222e-69 | 16           |
| UCP2         | GC         | LM02  |       |              |              |
| 1.166803e-73 | -0.6602478 |       | 0.985 | 0.991        | 2.080293e-69 |
| RPL30        | GC         | LM02  |       |              | 16           |
| 3.755951e-73 | 0.8051339  |       | 0.495 | 0.228        | 6.696485e-69 |
| ZCCHC7       | GC         | LM02  |       |              | 16           |
| 4.134587e-73 | -0.463603  |       | 0.998 | 0.999        | 7.371555e-69 |
| RPS18        | GC         | LM02  |       |              | 16           |
| 9.845623e-73 | 0.5338779  |       | 0.205 | 0.05         | 1.755376e-68 |
| CDKN2C       | GC         | LM02  |       |              | 16           |
| 1.372635e-72 | -0.6709476 |       | 0.987 | 0.991        | 2.44727e-68  |
| RPL9         | GC         | LM02  |       |              | 16           |
| 1.540323e-72 | -0.5855846 |       | 0.987 | 0.996        | 2.746241e-68 |
| RPL31        | GC         | LM02  |       |              | 16           |
| 1.971613e-72 | 0.5897492  |       | 0.256 | 0.071        | 3.515189e-68 |
| HS2ST1       | GC         | LM02  |       |              | 16           |
| 2.429575e-72 | -0.5654728 |       | 0.997 | 0.997        | 4.33169e-68  |
| RPS3A        | GC         | LM02  |       |              | 16           |
| 3.911013e-72 | 0.654708   | 0.516 | 0.252 | 6.972945e-68 | 16           |
| CDV3         | GC         | LM02  |       |              |              |
| 4.119243e-72 | -0.9959626 |       | 0.053 | 0.253        | 7.344198e-68 |
| TNFRSF13B    | GC         | LM02  |       |              | 16           |
| 4.250904e-72 | 0.7135777  |       | 0.446 | 0.175        | 7.578936e-68 |
| ZNF106       | GC         | LM02  |       |              | 16           |
| 4.954811e-72 | 0.6975725  |       | 0.696 | 0.396        | 8.833932e-68 |
| MBD4         | GC         | LM02  |       |              | 16           |
| 5.415271e-72 | -0.5597506 |       | 0.995 | 0.996        | 9.654887e-68 |
| RPL35A       | GC         | LM02  |       |              | 16           |
| 6.127075e-72 | 0.663319   | 0.367 | 0.129 | 1.092396e-67 | 16           |
| MAP4K1       | GC         | LM02  |       |              |              |
| 6.806284e-72 | 0.608213   | 0.414 | 0.179 | 1.213492e-67 | 16           |
| HSD17B12     | GC         | LM02  |       |              |              |
| 8.69649e-72  | 0.7421628  |       | 0.492 | 0.235        | 1.550497e-67 |
| NSRP1        | GC         | LM02  |       |              | 16           |
| 3.089277e-71 | -1.058661  |       | 0.087 | 0.278        | 5.507871e-67 |
| KLF2         | GC         | LM02  |       |              | 16           |
| 4.765004e-71 | 0.6333716  |       | 0.382 | 0.141        | 8.495525e-67 |
| P2RY8        | GC         | LM02  |       |              | 16           |
| 6.175456e-71 | 0.5333724  |       | 0.853 | 0.573        | 1.101022e-66 |
| LDHB         | GC         | LM02  |       |              | 16           |
| 7.320151e-71 | 0.6661015  |       | 0.355 | 0.122        | 1.30511e-66  |
| AMFR         | GC         | LM02  |       |              | 16           |
| 7.789936e-71 | 0.3683902  |       | 0.11  | 0.013        | 1.388868e-66 |
| BAIAP2L1     | GC         | LM02  |       |              | 16           |
| 3.049203e-70 | 0.6918414  |       | 0.581 | 0.293        | 5.436424e-66 |
| ITSN2        | GC         | LM02  |       |              | 16           |
| 4.238501e-70 | 0.7306781  |       | 0.62  | 0.34         | 7.556824e-66 |
| ABRACL       | GC         | LM02  |       |              | 16           |
| 1.194785e-69 | -0.7419837 |       | 0.833 | 0.906        | 2.130182e-65 |
| HLA-A        | GC         | LM02  |       |              | 16           |



|              |                |       |              |              |    |
|--------------|----------------|-------|--------------|--------------|----|
| 1.325865e-69 | -0.9397848     | 0.063 | 0.257        | 2.363885e-65 | 16 |
| FCMR         | GC LM02        |       |              |              |    |
| 1.640308e-69 | -0.6119139     | 0.981 | 0.985        | 2.924505e-65 | 16 |
| RPL27        | GC LM02        |       |              |              |    |
| 9.001252e-69 | 0.6136813      | 0.303 | 0.097        | 1.604833e-64 | 16 |
| LIMS1        | GC LM02        |       |              |              |    |
| 9.753145e-69 | 0.6709243      | 0.558 | 0.283        | 1.738888e-64 | 16 |
| RRAS2        | GC LM02        |       |              |              |    |
| 1.931291e-68 | 0.6449443      | 0.452 | 0.191        | 3.443299e-64 | 16 |
| POLD4        | GC LM02        |       |              |              |    |
| 2.20869e-68  | 0.4761279      | 0.132 | 0.018        | 3.937874e-64 | 16 |
| ETV7         | GC LM02        |       |              |              |    |
| 1.578933e-67 | 0.6115227      | 0.618 | 0.333        | 2.815079e-63 | 16 |
| RBBP4        | GC LM02        |       |              |              |    |
| 1.581068e-67 | 0.6595073      | 0.601 | 0.317        | 2.818886e-63 | 16 |
| IMP4         | GC LM02        |       |              |              |    |
| 1.703083e-67 | -1.501831      | 0.079 | 0.268        | 3.036426e-63 | 16 |
| S100A4       | GC LM02        |       |              |              |    |
| 2.854405e-67 | 0.6143362      | 0.688 | 0.414        | 5.089119e-63 | 16 |
| FAM49B       | GC LM02        |       |              |              |    |
| 3.075289e-67 | 0.6603563      | 0.519 | 0.264        | 5.482934e-63 | 16 |
| ERP44        | GC LM02        |       |              |              |    |
| 4.02292e-67  | 0.5666248      | 0.837 | 0.609        | 7.172463e-63 | 16 |
| ARPC5        | GC LM02        |       |              |              |    |
| 6.038846e-67 | -0.5540235     | 0.985 | 0.992        | 1.076666e-62 | 16 |
| RPL37        | GC LM02        |       |              |              |    |
| 1.563968e-66 | 0.6452711      | 0.346 | 0.115        | 2.788398e-62 | 16 |
| CD180        | GC LM02        |       |              |              |    |
| 1.879576e-66 | 0.683812 0.216 | 0.055 | 3.351097e-62 | 16           |    |
| RGS16        | GC LM02        |       |              |              |    |
| 2.307037e-66 | 0.6299574      | 0.334 | 0.112        | 4.113216e-62 | 16 |
| BRWD1        | GC LM02        |       |              |              |    |
| 1.170696e-65 | -0.9433383     | 0.035 | 0.224        | 2.087233e-61 | 16 |
| GBP2         | GC LM02        |       |              |              |    |
| 1.282761e-65 | 0.5839599      | 0.67  | 0.408        | 2.287034e-61 | 16 |
| HCLS1        | GC LM02        |       |              |              |    |
| 1.998332e-65 | -0.5875131     | 0.992 | 0.993        | 3.562826e-61 | 16 |
| RPL35        | GC LM02        |       |              |              |    |
| 6.029607e-65 | -1.12832 0.2   | 0.376 | 1.075019e-60 | 16           |    |
| SELL         | GC LM02        |       |              |              |    |
| 7.82636e-65  | -1.102955      | 0.267 | 0.499        | 1.395362e-60 | 16 |
| FXVD5        | GC LM02        |       |              |              |    |
| 8.425132e-65 | 0.6754476      | 0.302 | 0.073        | 1.502117e-60 | 16 |
| SUGCT        | GC LM02        |       |              |              |    |
| 9.660423e-65 | 0.8200792      | 0.619 | 0.342        | 1.722357e-60 | 16 |
| S100A10      | GC LM02        |       |              |              |    |
| 9.917085e-65 | 0.7585803      | 0.42  | 0.192        | 1.768117e-60 | 16 |
| IDH2         | GC LM02        |       |              |              |    |
| 3.073339e-64 | 0.5978985      | 0.675 | 0.412        | 5.479455e-60 | 16 |
| ELF1         | GC LM02        |       |              |              |    |

|              |            |       |       |              |    |
|--------------|------------|-------|-------|--------------|----|
| 4.037299e-64 | 0.6056688  | 0.396 | 0.156 | 7.1981e-60   | 16 |
| UBE2R2       | GC LM02    |       |       |              |    |
| 8.445503e-64 | 0.5969158  | 0.563 | 0.307 | 1.505749e-59 | 16 |
| LPXN         | GC LM02    |       |       |              |    |
| 8.548591e-64 | -0.6865487 | 0.957 | 0.977 | 1.524128e-59 | 16 |
| RPL36A       | GC LM02    |       |       |              |    |
| 1.977215e-63 | 0.6899034  | 0.58  | 0.312 | 3.525177e-59 | 16 |
| FCRLA        | GC LM02    |       |       |              |    |
| 3.209109e-63 | -0.4448368 | 0.998 | 0.999 | 5.72152e-59  | 16 |
| RPS8         | GC LM02    |       |       |              |    |
| 5.591679e-63 | 0.5947679  | 0.595 | 0.33  | 9.969404e-59 | 16 |
| SEPHS2       | GC LM02    |       |       |              |    |
| 1.01587e-62  | 0.6192242  | 0.579 | 0.299 | 1.811194e-58 | 16 |
| TIMM8B       | GC LM02    |       |       |              |    |
| 3.083583e-62 | 0.5385203  | 0.233 | 0.057 | 5.49772e-58  | 16 |
| DCAF12       | GC LM02    |       |       |              |    |
| 6.991904e-62 | 0.4469353  | 0.165 | 0.027 | 1.246587e-57 | 16 |
| FGD6         | GC LM02    |       |       |              |    |
| 1.476564e-61 | 0.3781279  | 0.125 | 0.016 | 2.632565e-57 | 16 |
| AL512631.1   | GC LM02    |       |       |              |    |
| 2.058144e-61 | 0.4189337  | 0.143 | 0.027 | 3.669466e-57 | 16 |
| ZFAND4       | GC LM02    |       |       |              |    |
| 3.225278e-61 | 0.5902129  | 0.658 | 0.388 | 5.750347e-57 | 16 |
| YWHAE        | GC LM02    |       |       |              |    |
| 5.22589e-61  | 0.6103244  | 0.335 | 0.119 | 9.317239e-57 | 16 |
| PLEK         | GC LM02    |       |       |              |    |
| 6.733614e-61 | 0.6097401  | 0.281 | 0.09  | 1.200536e-56 | 16 |
| RNGTT        | GC LM02    |       |       |              |    |
| 2.069764e-60 | 0.6944575  | 0.288 | 0.094 | 3.690183e-56 | 16 |
| MX1          | GC LM02    |       |       |              |    |
| 3.779678e-60 | 0.6309976  | 0.74  | 0.487 | 6.738788e-56 | 16 |
| C4orf3       | GC LM02    |       |       |              |    |
| 4.539704e-60 | 0.7311315  | 0.493 | 0.26  | 8.093839e-56 | 16 |
| FAM3C        | GC LM02    |       |       |              |    |
| 6.087339e-60 | -0.4692186 | 0.996 | 0.998 | 1.085312e-55 | 16 |
| RPS28        | GC LM02    |       |       |              |    |
| 2.598901e-59 | 0.6381289  | 0.533 | 0.287 | 4.633581e-55 | 16 |
| HSPA4        | GC LM02    |       |       |              |    |
| 3.538449e-59 | -0.9359474 | 0.232 | 0.449 | 6.3087e-55   | 16 |
| ANXA2        | GC LM02    |       |       |              |    |
| 3.560148e-59 | 0.6537729  | 0.503 | 0.251 | 6.347387e-55 | 16 |
| LYSMD2       | GC LM02    |       |       |              |    |
| 4.170924e-59 | -0.5015395 | 0.998 | 0.998 | 7.43634e-55  | 16 |
| RPS14        | GC LM02    |       |       |              |    |
| 6.663368e-59 | 0.3970462  | 0.151 | 0.033 | 1.188012e-54 | 16 |
| NDFIP2       | GC LM02    |       |       |              |    |
| 7.811983e-59 | 0.5260376  | 0.777 | 0.517 | 1.392798e-54 | 16 |
| TRAPPC1      | GC LM02    |       |       |              |    |
| 9.867972e-59 | 0.5082506  | 0.858 | 0.635 | 1.759361e-54 | 16 |
| ERH          | GC LM02    |       |       |              |    |

|              |            |       |       |              |     |
|--------------|------------|-------|-------|--------------|-----|
| 1.027891e-58 | 0.5583992  | 0.674 | 0.401 | 1.832627e-54 | 16  |
| LSM10        | GC LM02    |       |       |              |     |
| 1.717515e-58 | 0.5730248  | 0.309 | 0.105 | 3.062157e-54 | 16  |
| MAP4K2       | GC LM02    |       |       |              |     |
| 2.079268e-58 | -0.9316291 | 0.309 | 0.506 | 3.707128e-54 | 16  |
| FOXP1        | GC LM02    |       |       |              |     |
| 4.324214e-58 | -0.4732358 | 1     | 1     | 7.709641e-54 | 16  |
| RPS27        | GC LM02    |       |       |              |     |
| 7.064003e-58 | 0.5615672  | 0.695 | 0.431 | 1.259441e-53 | 16  |
| COTL1        | GC LM02    |       |       |              |     |
| 7.228393e-58 | -0.8721585 | 0.133 | 0.333 | 1.28875e-53  | 16  |
| TRBC2        | GC LM02    |       |       |              |     |
| 2.268732e-57 | 0.4920785  | 0.234 | 0.067 | 4.044922e-53 | 16  |
| TERF2        | GC LM02    |       |       |              |     |
| 2.304629e-57 | -0.515913  | 1     | 0.999 | 4.108924e-53 | 16  |
| EEF1A1       | GC LM02    |       |       |              |     |
| 3.943083e-57 | 0.551663   | 0.665 | 0.386 | 7.030123e-53 | 16  |
| FNBP1        | GC LM02    |       |       |              |     |
| 4.752313e-57 | -0.9654321 | 0.122 | 0.301 | 8.472899e-53 | 16  |
| LINC00926    | GC LM02    |       |       |              |     |
| 7.375188e-57 | 0.4982134  | 0.842 | 0.623 | 1.314922e-52 | 16  |
| ATP5F1B      | GC LM02    |       |       |              |     |
| 1.20246e-56  | -0.7953826 | 0.509 | 0.681 | 2.143866e-52 | 16  |
| TAGLN2       | GC LM02    |       |       |              |     |
| 1.238089e-56 | 0.5475724  | 0.312 | 0.106 | 2.207389e-52 | 16  |
| MOB3A        | GC LM02    |       |       |              |     |
| 1.432362e-56 | 0.5769098  | 0.553 | 0.31  | 2.553759e-52 | 16  |
| WDR1         | GC LM02    |       |       |              |     |
| 1.48655e-56  | 0.524271   | 0.211 | 0.053 | 2.650369e-52 | 16  |
| GC LM02      |            |       |       |              | MME |
| 2.568219e-56 | 0.5416459  | 0.666 | 0.377 | 4.578878e-52 | 16  |
| EVL          | GC LM02    |       |       |              |     |
| 3.175693e-56 | 0.5309717  | 0.363 | 0.141 | 5.661944e-52 | 16  |
| ANKRD13A     | GC LM02    |       |       |              |     |
| 4.752864e-56 | 0.4479466  | 0.879 | 0.693 | 8.473881e-52 | 16  |
| CIRBP        | GC LM02    |       |       |              |     |
| 1.096549e-55 | -0.9146447 | 0.171 | 0.351 | 1.955037e-51 | 16  |
| TRAF3IP3     | GC LM02    |       |       |              |     |
| 1.29297e-55  | 0.5709269  | 0.346 | 0.141 | 2.305237e-51 | 16  |
| DNAJC10      | GC LM02    |       |       |              |     |
| 2.247326e-55 | 0.5410643  | 0.766 | 0.485 | 4.006757e-51 | 16  |
| RAC2         | GC LM02    |       |       |              |     |
| 3.447055e-55 | 0.5205564  | 0.758 | 0.511 | 6.145755e-51 | 16  |
| SMDT1        | GC LM02    |       |       |              |     |
| 3.631353e-55 | 0.3492915  | 0.981 | 0.902 | 6.474339e-51 | 16  |
| SRP14        | GC LM02    |       |       |              |     |
| 3.758402e-55 | 0.5416544  | 0.335 | 0.117 | 6.700855e-51 | 16  |
| SSBP2        | GC LM02    |       |       |              |     |
| 4.190179e-55 | -0.5263884 | 0.997 | 0.994 | 7.47067e-51  | 16  |
| RPL37A       | GC LM02    |       |       |              |     |

|              |                |       |              |              |    |
|--------------|----------------|-------|--------------|--------------|----|
| 4.744538e-55 | 0.519813 0.242 | 0.071 | 8.459036e-51 | 16           |    |
| TMED8        | GC LM02        |       |              |              |    |
| 5.659388e-55 | 0.596214 0.598 | 0.356 | 1.009012e-50 | 16           |    |
| REEP5        | GC LM02        |       |              |              |    |
| 5.663462e-55 | -1.022515      | 0.341 | 0.527        | 1.009739e-50 | 16 |
| ID3          | GC LM02        |       |              |              |    |
| 1.128104e-54 | 0.4902819      | 0.738 | 0.484        | 2.011296e-50 | 16 |
| CCT8         | GC LM02        |       |              |              |    |
| 1.226372e-54 | -0.6020293     | 0.981 | 0.987        | 2.186498e-50 | 16 |
| RPL14        | GC LM02        |       |              |              |    |
| 1.334978e-54 | 0.5693087      | 0.474 | 0.251        | 2.380133e-50 | 16 |
| AC02         | GC LM02        |       |              |              |    |
| 1.588303e-54 | -0.478563      | 0.998 | 0.997        | 2.831785e-50 | 16 |
| RPS23        | GC LM02        |       |              |              |    |
| 1.986716e-54 | 0.6109727      | 0.496 | 0.231        | 3.542115e-50 | 16 |
| CCND3        | GC LM02        |       |              |              |    |
| 2.011485e-54 | -0.9879168     | 0.234 | 0.468        | 3.586276e-50 | 16 |
| CD63         | GC LM02        |       |              |              |    |
| 2.360046e-54 | 0.5306158      | 0.226 | 0.07         | 4.207726e-50 | 16 |
| DOK3         | GC LM02        |       |              |              |    |
| 2.774506e-54 | 0.450461 0.912 | 0.761 | 4.946667e-50 | 16           |    |
| MYL12A       | GC LM02        |       |              |              |    |
| 2.956972e-54 | 0.5209311      | 0.391 | 0.172        | 5.271986e-50 | 16 |
| LAP3         | GC LM02        |       |              |              |    |
| 3.436934e-54 | 0.5876691      | 0.648 | 0.375        | 6.127709e-50 | 16 |
| LSM8         | GC LM02        |       |              |              |    |
| 4.603033e-54 | -1.064894      | 0.132 | 0.32         | 8.206747e-50 | 16 |
| CD69         | GC LM02        |       |              |              |    |
| 5.018184e-54 | 0.5014629      | 0.183 | 0.041        | 8.946921e-50 | 16 |
| IZUM04       | GC LM02        |       |              |              |    |
| 8.635467e-54 | 0.4298027      | 0.148 | 0.035        | 1.539617e-49 | 16 |
| IGLC5        | GC LM02        |       |              |              |    |
| 3.502786e-53 | 0.4631089      | 0.849 | 0.63         | 6.245118e-49 | 16 |
| HERPUD1      | GC LM02        |       |              |              |    |
| 4.188436e-53 | 0.5632633      | 0.389 | 0.175        | 7.467562e-49 | 16 |
| TMC6         | GC LM02        |       |              |              |    |
| 4.34263e-53  | 0.4499672      | 0.136 | 0.025        | 7.742475e-49 | 16 |
| FEZ1         | GC LM02        |       |              |              |    |
| 5.983069e-53 | 0.5330588      | 0.54  | 0.295        | 1.066721e-48 | 16 |
| ATP6V0D1     | GC LM02        |       |              |              |    |
| 1.013596e-52 | 0.3433331      | 0.131 | 0.022        | 1.80714e-48  | 16 |
| SERP2        | GC LM02        |       |              |              |    |
| 1.092923e-52 | 0.5765363      | 0.384 | 0.167        | 1.948572e-48 | 16 |
| BLOC1S6      | GC LM02        |       |              |              |    |
| 1.156618e-52 | -0.6227901     | 0.945 | 0.966        | 2.062134e-48 | 16 |
| RPL38        | GC LM02        |       |              |              |    |
| 1.214314e-52 | 0.3596584      | 0.949 | 0.802        | 2.165e-48    | 16 |
| HNRNPK       | GC LM02        |       |              |              |    |
| 2.825396e-52 | 0.4671834      | 0.869 | 0.683        | 5.037398e-48 | 16 |
| PPP1CA       | GC LM02        |       |              |              |    |

|              |                |       |       |              |    |
|--------------|----------------|-------|-------|--------------|----|
| 5.730899e-52 | 0.5717269      | 0.586 | 0.307 | 1.021762e-47 | 16 |
| PSIP1        | GC LM02        |       |       |              |    |
| 8.756752e-52 | -0.549965      | 0.99  | 0.992 | 1.561241e-47 | 16 |
| RPL36        | GC LM02        |       |       |              |    |
| 9.707385e-52 | 0.5715393      | 0.554 | 0.308 | 1.73073e-47  | 16 |
| SPI1         | GC LM02        |       |       |              |    |
| 1.060946e-51 | 0.502539 0.691 | 0.434 |       | 1.89156e-47  | 16 |
| HMGA1        | GC LM02        |       |       |              |    |
| 1.089932e-51 | 0.5316934      | 0.533 | 0.28  | 1.94324e-47  | 16 |
| PLEKHF2      | GC LM02        |       |       |              |    |
| 1.566131e-51 | 0.6888664      | 0.677 | 0.39  | 2.792255e-47 | 16 |
| CSTB         | GC LM02        |       |       |              |    |
| 3.897748e-51 | 0.5033237      | 0.742 | 0.511 | 6.949295e-47 | 16 |
| CAPZB        | GC LM02        |       |       |              |    |
| 4.643606e-51 | 0.5487366      | 0.571 | 0.317 | 8.279085e-47 | 16 |
| HSBP1        | GC LM02        |       |       |              |    |
| 1.019882e-50 | 0.5978835      | 0.528 | 0.269 | 1.818348e-46 | 16 |
| ITGAE        | GC LM02        |       |       |              |    |
| 1.372784e-50 | 0.511432 0.297 | 0.113 |       | 2.447537e-46 | 16 |
| ACYP2        | GC LM02        |       |       |              |    |
| 1.503557e-50 | 0.5426251      | 0.33  | 0.14  | 2.680692e-46 | 16 |
| MDFIC        | GC LM02        |       |       |              |    |
| 2.46987e-50  | -0.4675587     | 0.998 | 0.997 | 4.403531e-46 | 16 |
| RPL7         | GC LM02        |       |       |              |    |
| 2.47568e-50  | -0.3982374     | 0.998 | 0.999 | 4.41389e-46  | 16 |
| RPS19        | GC LM02        |       |       |              |    |
| 2.575408e-50 | 0.4718281      | 0.828 | 0.603 | 4.591695e-46 | 16 |
| POMP         | GC LM02        |       |       |              |    |
| 4.575697e-50 | 0.5761819      | 0.581 | 0.325 | 8.15801e-46  | 16 |
| CCM2         | GC LM02        |       |       |              |    |
| 4.974811e-50 | -0.8100419     | 0.114 | 0.282 | 8.86959e-46  | 16 |
| IFITM2       | GC LM02        |       |       |              |    |
| 5.899172e-50 | 0.5255092      | 0.699 | 0.45  | 1.051763e-45 | 16 |
| CAPZA1       | GC LM02        |       |       |              |    |
| 6.079199e-50 | 0.7854987      | 0.363 | 0.147 | 1.08386e-45  | 16 |
| DUSP2        | GC LM02        |       |       |              |    |
| 6.740611e-50 | 0.5168789      | 0.608 | 0.358 | 1.201784e-45 | 16 |
| PPP2CA       | GC LM02        |       |       |              |    |
| 7.228627e-50 | 0.5568154      | 0.484 | 0.247 | 1.288792e-45 | 16 |
| RGS10        | GC LM02        |       |       |              |    |
| 7.30457e-50  | -0.4289867     | 0.999 | 0.998 | 1.302332e-45 | 16 |
| RPL26        | GC LM02        |       |       |              |    |
| 9.323156e-50 | 0.467377 0.834 | 0.609 |       | 1.662225e-45 | 16 |
| UQCR10       | GC LM02        |       |       |              |    |
| 1.563126e-49 | -0.7929316     | 0.042 | 0.201 | 2.786898e-45 | 16 |
| YBX3         | GC LM02        |       |       |              |    |
| 1.796728e-49 | 0.5091263      | 0.622 | 0.385 | 3.203386e-45 | 16 |
| ARPC4        | GC LM02        |       |       |              |    |
| 2.357746e-49 | -0.4376652     | 0.998 | 0.998 | 4.203625e-45 | 16 |
| RPL23A       | GC LM02        |       |       |              |    |

|              |                |       |              |              |    |
|--------------|----------------|-------|--------------|--------------|----|
| 2.41377e-49  | 0.5111408      | 0.649 | 0.406        | 4.30351e-45  | 16 |
| MOB1A        | GC LM02        |       |              |              |    |
| 2.875903e-49 | 0.3140438      | 0.115 | 0.022        | 5.127447e-45 | 16 |
| AC090152.1   | GC LM02        |       |              |              |    |
| 4.745433e-49 | 0.4988937      | 0.588 | 0.345        | 8.460633e-45 | 16 |
| LSM14A       | GC LM02        |       |              |              |    |
| 4.771471e-49 | 0.5330258      | 0.284 | 0.1          | 8.507056e-45 | 16 |
| OTULIN       | GC LM02        |       |              |              |    |
| 7.205981e-49 | 0.5600159      | 0.354 | 0.145        | 1.284754e-44 | 16 |
| PTPN18       | GC LM02        |       |              |              |    |
| 8.252979e-49 | 0.4820006      | 0.716 | 0.45         | 1.471424e-44 | 16 |
| COX17        | GC LM02        |       |              |              |    |
| 1.540247e-48 | 0.4823489      | 0.235 | 0.078        | 2.746107e-44 | 16 |
| RANBP2       | GC LM02        |       |              |              |    |
| 1.852555e-48 | 0.3178452      | 0.114 | 0.019        | 3.30292e-44  | 16 |
| LOXL2        | GC LM02        |       |              |              |    |
| 1.978552e-48 | 0.4107469      | 0.822 | 0.613        | 3.527561e-44 | 16 |
| NDUFA13      | GC LM02        |       |              |              |    |
| 4.677551e-48 | -0.5220707     | 0.98  | 0.984        | 8.339606e-44 | 16 |
| RPL29        | GC LM02        |       |              |              |    |
| 8.27996e-48  | 0.507216 0.682 | 0.43  | 1.476234e-43 | 16           |    |
| ROM01        | GC LM02        |       |              |              |    |
| 8.668751e-48 | 0.5746069      | 0.578 | 0.326        | 1.545552e-43 | 16 |
| BPTF         | GC LM02        |       |              |              |    |
| 1.026454e-47 | 0.54287 0.538  | 0.291 | 1.830065e-43 | 16           |    |
| PDHB         | GC LM02        |       |              |              |    |
| 1.051166e-47 | 0.4733596      | 0.766 | 0.518        | 1.874123e-43 | 16 |
| FKBP1A       | GC LM02        |       |              |              |    |
| 1.134015e-47 | 0.4920431      | 0.26  | 0.085        | 2.021836e-43 | 16 |
| MAP4K4       | GC LM02        |       |              |              |    |
| 1.399259e-47 | 0.5000599      | 0.332 | 0.13         | 2.494738e-43 | 16 |
| CERS4        | GC LM02        |       |              |              |    |
| 1.411148e-47 | 0.4751689      | 0.199 | 0.066        | 2.515935e-43 | 16 |
| EYA3         | GC LM02        |       |              |              |    |
| 3.286896e-47 | 0.439628 0.738 | 0.499 | 5.860206e-43 | 16           |    |
| EIF3I        | GC LM02        |       |              |              |    |
| 3.820001e-47 | 0.422713 0.173 | 0.042 | 6.810679e-43 | 16           |    |
| MYBL1        | GC LM02        |       |              |              |    |
| 4.625603e-47 | 0.4916947      | 0.66  | 0.424        | 8.246987e-43 | 16 |
| KTN1         | GC LM02        |       |              |              |    |
| 5.645676e-47 | 0.4118415      | 0.796 | 0.574        | 1.006568e-42 | 16 |
| COPE         | GC LM02        |       |              |              |    |
| 7.575341e-47 | 0.5389098      | 0.386 | 0.172        | 1.350608e-42 | 16 |
| RGS19        | GC LM02        |       |              |              |    |
| 1.093949e-46 | 0.6169593      | 0.451 | 0.205        | 1.950402e-42 | 16 |
| ADA          | GC LM02        |       |              |              |    |
| 1.240261e-46 | 0.4973064      | 0.693 | 0.473        | 2.211261e-42 | 16 |
| GRB2         | GC LM02        |       |              |              |    |
| 2.536233e-46 | 0.5100423      | 0.37  | 0.173        | 4.52185e-42  | 16 |
| TRAPPC6A     | GC LM02        |       |              |              |    |

|              |                |       |              |              |    |
|--------------|----------------|-------|--------------|--------------|----|
| 2.632241e-46 | 0.5105538      | 0.249 | 0.079        | 4.693022e-42 | 16 |
| GPR18        | GC LM02        |       |              |              |    |
| 3.479139e-46 | -0.9452955     | 0.093 | 0.272        | 6.202956e-42 | 16 |
| GPR183       | GC LM02        |       |              |              |    |
| 3.901464e-46 | -0.8568118     | 0.115 | 0.272        | 6.95592e-42  | 16 |
| JUN          | GC LM02        |       |              |              |    |
| 3.986556e-46 | 0.5488411      | 0.294 | 0.097        | 7.10763e-42  | 16 |
| MYBL2        | GC LM02        |       |              |              |    |
| 4.118383e-46 | 0.4959068      | 0.696 | 0.463        | 7.342665e-42 | 16 |
| PRDX5        | GC LM02        |       |              |              |    |
| 6.934278e-46 | -0.7965785     | 0.151 | 0.324        | 1.236312e-41 | 16 |
| TUBA1A       | GC LM02        |       |              |              |    |
| 8.737611e-46 | 0.5508366      | 0.396 | 0.171        | 1.557829e-41 | 16 |
| SYK          | GC LM02        |       |              |              |    |
| 1.74277e-45  | 0.5664241      | 0.259 | 0.094        | 3.107185e-41 | 16 |
| CCDC28B      | GC LM02        |       |              |              |    |
| 1.8555e-45   | 0.4469348      | 0.718 | 0.472        | 3.308171e-41 | 16 |
| UBE2N        | GC LM02        |       |              |              |    |
| 2.07533e-45  | 0.4075181      | 0.847 | 0.643        | 3.700105e-41 | 16 |
| UQCR11       | GC LM02        |       |              |              |    |
| 2.411542e-45 | 0.5057695      | 0.336 | 0.137        | 4.299538e-41 | 16 |
| CUL3         | GC LM02        |       |              |              |    |
| 2.440536e-45 | 0.5201912      | 0.423 | 0.204        | 4.351232e-41 | 16 |
| TCEAL8       | GC LM02        |       |              |              |    |
| 3.208182e-45 | 0.3314571      | 0.977 | 0.937        | 5.719867e-41 | 16 |
| EEF2         | GC LM02        |       |              |              |    |
| 4.030827e-45 | -0.5416807     | 0.996 | 0.996        | 7.186562e-41 | 16 |
| RPL12        | GC LM02        |       |              |              |    |
| 4.971031e-45 | 0.4362899      | 0.227 | 0.075        | 8.862851e-41 | 16 |
| WEE1         | GC LM02        |       |              |              |    |
| 6.926413e-45 | 0.4137695      | 0.184 | 0.06         | 1.23491e-40  | 16 |
| BCAR3        | GC LM02        |       |              |              |    |
| 7.083657e-45 | 0.4301903      | 0.158 | 0.047        | 1.262945e-40 | 16 |
| SHCBP1       | GC LM02        |       |              |              |    |
| 9.416064e-45 | -0.7124068     | 0.055 | 0.198        | 1.67879e-40  | 16 |
| CLEC2B       | GC LM02        |       |              |              |    |
| 9.950404e-45 | 0.491636 0.454 | 0.241 | 1.774058e-40 | 16           |    |
| TPM4         | GC LM02        |       |              |              |    |
| 1.231026e-44 | 0.5345042      | 0.31  | 0.123        | 2.194796e-40 | 16 |
| MSI2         | GC LM02        |       |              |              |    |
| 1.242432e-44 | 0.5262248      | 0.444 | 0.226        | 2.215133e-40 | 16 |
| SEPT1        | GC LM02        |       |              |              |    |
| 1.265844e-44 | 0.4949859      | 0.676 | 0.441        | 2.256874e-40 | 16 |
| ATP5F1C      | GC LM02        |       |              |              |    |
| 1.32048e-44  | 0.5338853      | 0.562 | 0.316        | 2.354284e-40 | 16 |
| NAA38        | GC LM02        |       |              |              |    |
| 1.38747e-44  | -0.6364785     | 0.959 | 0.968        | 2.47372e-40  | 16 |
| RPS17        | GC LM02        |       |              |              |    |
| 1.952715e-44 | 0.4804726      | 0.651 | 0.41         | 3.481496e-40 | 16 |
| PPP1CC       | GC LM02        |       |              |              |    |

|              |                |       |       |              |    |
|--------------|----------------|-------|-------|--------------|----|
| 2.502158e-44 | 0.3649451      | 0.139 | 0.031 | 4.461097e-40 | 16 |
| RAPGEF5      | GC LM02        |       |       |              |    |
| 3.382288e-44 | 0.4246526      | 0.16  | 0.042 | 6.030281e-40 | 16 |
| ASB2         | GC LM02        |       |       |              |    |
| 5.255966e-44 | 0.3457339      | 0.139 | 0.035 | 9.370862e-40 | 16 |
| PRDM15       | GC LM02        |       |       |              |    |
| 5.80085e-44  | 0.3710864      | 0.908 | 0.719 | 1.034233e-39 | 16 |
| COX6C        | GC LM02        |       |       |              |    |
| 6.639556e-44 | 0.4569586      | 0.709 | 0.48  | 1.183766e-39 | 16 |
| UBE2L3       | GC LM02        |       |       |              |    |
| 1.14672e-43  | -1.12103 0.555 | 0.668 |       | 2.044486e-39 | 16 |
| TUBA1B       | GC LM02        |       |       |              |    |
| 1.689577e-43 | 0.3655501      | 0.704 | 0.458 | 3.012347e-39 | 16 |
| PRMT1        | GC LM02        |       |       |              |    |
| 2.697194e-43 | 0.5258113      | 0.296 | 0.12  | 4.808827e-39 | 16 |
| DLAT         | GC LM02        |       |       |              |    |
| 3.363889e-43 | 0.4826048      | 0.637 | 0.386 | 5.997478e-39 | 16 |
| SH3BGRL      | GC LM02        |       |       |              |    |
| 3.960321e-43 | 0.4894532      | 0.593 | 0.315 | 7.060857e-39 | 16 |
| TNFRSF13C    | GC LM02        |       |       |              |    |
| 4.349873e-43 | 0.4485336      | 0.247 | 0.085 | 7.755389e-39 | 16 |
| CHIC2        | GC LM02        |       |       |              |    |
| 4.514176e-43 | 0.576783 0.545 | 0.325 |       | 8.048324e-39 | 16 |
| TSP0         | GC LM02        |       |       |              |    |
| 4.722052e-43 | 0.4682185      | 0.276 | 0.105 | 8.418946e-39 | 16 |
| RAB11FIP1    | GC LM02        |       |       |              |    |
| 4.723411e-43 | -0.4028436     | 0.996 | 0.997 | 8.42137e-39  | 16 |
| RPL27A       | GC LM02        |       |       |              |    |
| 6.389325e-43 | 0.3826796      | 0.147 | 0.037 | 1.139153e-38 | 16 |
| SYBU         | GC LM02        |       |       |              |    |
| 6.394178e-43 | 0.4166421      | 0.796 | 0.579 | 1.140018e-38 | 16 |
| NDUFB2       | GC LM02        |       |       |              |    |
| 6.754687e-43 | -1.157216      | 0.74  | 0.444 | 1.204293e-38 | 16 |
| IGHG3        | GC LM02        |       |       |              |    |
| 7.678942e-43 | 0.7009543      | 0.714 | 0.493 | 1.369079e-38 | 16 |
| SAT1         | GC LM02        |       |       |              |    |
| 8.350929e-43 | 0.5004941      | 0.387 | 0.188 | 1.488887e-38 | 16 |
| REPIN1       | GC LM02        |       |       |              |    |
| 8.422832e-43 | 0.4385433      | 0.855 | 0.666 | 1.501707e-38 | 16 |
| SNX3         | GC LM02        |       |       |              |    |
| 1.171e-42    | 0.3861203      | 0.875 | 0.68  | 2.087775e-38 | 16 |
| COX6A1       | GC LM02        |       |       |              |    |
| 1.183244e-42 | 0.4011455      | 0.842 | 0.64  | 2.109606e-38 | 16 |
| HNRNPC       | GC LM02        |       |       |              |    |
| 1.796115e-42 | 0.3967255      | 0.153 | 0.038 | 3.202293e-38 | 16 |
| SLC30A4      | GC LM02        |       |       |              |    |
| 2.340533e-42 | -0.7135181     | 0.057 | 0.199 | 4.172937e-38 | 16 |
| CHPT1        | GC LM02        |       |       |              |    |
| 3.989112e-42 | -0.4777846     | 0.982 | 0.988 | 7.112188e-38 | 16 |
| RPLP0        | GC LM02        |       |       |              |    |



|              |            |       |       |              |              |
|--------------|------------|-------|-------|--------------|--------------|
| 1.006191e-41 | 0.325017   | 0.979 | 0.903 | 1.793937e-37 | 16           |
| ATP5F1E      | GC LM02    |       |       |              |              |
| 2.131473e-41 | 0.4855434  |       | 0.491 | 0.276        | 3.800204e-37 |
| BABAM1       | GC LM02    |       |       |              | 16           |
| 2.391624e-41 | 0.3555636  |       | 0.881 | 0.696        | 4.264027e-37 |
| ELOB         | GC LM02    |       |       |              | 16           |
| 2.643554e-41 | 0.4275987  |       | 0.672 | 0.447        | 4.713193e-37 |
| MAP1LC3B     | GC LM02    |       |       |              | 16           |
| 2.822429e-41 | 0.4421715  |       | 0.767 | 0.606        | 5.032109e-37 |
| SYNGR2       | GC LM02    |       |       |              | 16           |
| 3.269776e-41 | -0.3809393 |       | 0.992 | 0.994        | 5.829684e-37 |
| RPS9         | GC LM02    |       |       |              | 16           |
| 3.518195e-41 | -0.6474269 |       | 0.035 | 0.166        | 6.27259e-37  |
| MARCKS       | GC LM02    |       |       |              | 16           |
| 4.433053e-41 | -1.43974   | 0.139 | 0.29  | 7.90369e-37  | 16           |
| MIR155HG     | GC LM02    |       |       |              |              |
| 4.862027e-41 | 0.3673065  |       | 0.141 | 0.037        | 8.668508e-37 |
| MGST2        | GC LM02    |       |       |              | 16           |
| 4.939178e-41 | 0.3747212  |       | 0.139 | 0.032        | 8.806061e-37 |
| MCTP2        | GC LM02    |       |       |              | 16           |
| 5.076308e-41 | 0.5120242  |       | 0.527 | 0.323        | 9.05055e-37  |
| BST2         | GC LM02    |       |       |              | 16           |
| 1.367679e-40 | 0.5191592  |       | 0.39  | 0.191        | 2.438435e-36 |
| USP34        | GC LM02    |       |       |              | 16           |
| 1.473902e-40 | 0.4177413  |       | 0.181 | 0.051        | 2.627819e-36 |
| BCL6         | GC LM02    |       |       |              | 16           |
| 1.54628e-40  | -0.8100518 |       | 0.088 | 0.241        | 2.756863e-36 |
| CAPG         | GC LM02    |       |       |              | 16           |
| 1.546778e-40 | 0.4510762  |       | 0.814 | 0.63         | 2.75775e-36  |
| BRK1         | GC LM02    |       |       |              | 16           |
| 1.989311e-40 | 0.3825835  |       | 0.861 | 0.67         | 3.546742e-36 |
| ATP5ME       | GC LM02    |       |       |              | 16           |
| 2.322368e-40 | 0.3202985  |       | 0.112 | 0.028        | 4.14055e-36  |
| SCARB1       | GC LM02    |       |       |              | 16           |
| 3.16038e-40  | 0.4848233  |       | 0.425 | 0.215        | 5.634642e-36 |
| SNX5         | GC LM02    |       |       |              | 16           |
| 3.542053e-40 | 0.4754901  |       | 0.364 | 0.181        | 6.315127e-36 |
| MVD          | GC LM02    |       |       |              | 16           |
| 3.983833e-40 | 0.4739036  |       | 0.571 | 0.344        | 7.102776e-36 |
| PDIA6        | GC LM02    |       |       |              | 16           |
| 4.73176e-40  | 0.3906649  |       | 0.81  | 0.603        | 8.436254e-36 |
| POLR2L       | GC LM02    |       |       |              | 16           |
| 5.439507e-40 | -0.6132738 |       | 0.965 | 0.978        | 9.698098e-36 |
| RPS10        | GC LM02    |       |       |              | 16           |
| 6.747801e-40 | -0.3879803 |       | 0.999 | 0.999        | 1.203065e-35 |
| RPS6         | GC LM02    |       |       |              | 16           |
| 7.376944e-40 | 0.4771431  |       | 0.298 | 0.122        | 1.315235e-35 |
| COMMD4       | GC LM02    |       |       |              | 16           |
| 8.569764e-40 | 0.486128   | 0.475 | 0.227 | 1.527903e-35 | 16           |
| IL4R         | GC LM02    |       |       |              |              |

|              |                |       |              |              |    |
|--------------|----------------|-------|--------------|--------------|----|
| 1.125775e-39 | 0.5188761      | 0.389 | 0.186        | 2.007145e-35 | 16 |
| LBR          | GC LM02        |       |              |              |    |
| 1.152897e-39 | 0.4723713      | 0.496 | 0.279        | 2.055501e-35 | 16 |
| PRDX3        | GC LM02        |       |              |              |    |
| 1.157538e-39 | 0.4691579      | 0.374 | 0.178        | 2.063775e-35 | 16 |
| TLR10        | GC LM02        |       |              |              |    |
| 1.512209e-39 | 0.4759537      | 0.269 | 0.108        | 2.696118e-35 | 16 |
| TRAC         | GC LM02        |       |              |              |    |
| 1.908725e-39 | 0.4558762      | 0.532 | 0.328        | 3.403065e-35 | 16 |
| EIF3A        | GC LM02        |       |              |              |    |
| 2.087513e-39 | 0.3434626      | 0.104 | 0.019        | 3.721827e-35 | 16 |
| ANK1         | GC LM02        |       |              |              |    |
| 2.276567e-39 | 0.5348478      | 0.231 | 0.094        | 4.058891e-35 | 16 |
| PDXK         | GC LM02        |       |              |              |    |
| 2.805319e-39 | 0.4816005      | 0.526 | 0.321        | 5.001604e-35 | 16 |
| MRPS36       | GC LM02        |       |              |              |    |
| 3.122682e-39 | 0.4738656      | 0.316 | 0.123        | 5.567431e-35 | 16 |
| STAP1        | GC LM02        |       |              |              |    |
| 5.012098e-39 | 0.469918 0.483 | 0.273 | 8.93607e-35  | 16           |    |
| CNIH1        | GC LM02        |       |              |              |    |
| 5.632017e-39 | 0.4094401      | 0.787 | 0.573        | 1.004132e-34 | 16 |
| POU2F2       | GC LM02        |       |              |              |    |
| 6.0117e-39   | 0.419693 0.661 | 0.425 | 1.071826e-34 | 16           |    |
| CLTA         | GC LM02        |       |              |              |    |
| 7.74172e-39  | -0.718567      | 0.06  | 0.214        | 1.380271e-34 | 16 |
| MGST3        | GC LM02        |       |              |              |    |
| 1.337034e-38 | 0.3945265      | 0.208 | 0.067        | 2.383798e-34 | 16 |
| MTA3         | GC LM02        |       |              |              |    |
| 1.53142e-38  | 0.4818593      | 0.448 | 0.241        | 2.730369e-34 | 16 |
| NBDY         | GC LM02        |       |              |              |    |
| 2.03718e-38  | 0.499603 0.443 | 0.237 | 3.632088e-34 | 16           |    |
| NCOA3        | GC LM02        |       |              |              |    |
| 2.777726e-38 | 0.3657414      | 0.141 | 0.032        | 4.952407e-34 | 16 |
| AC012368.1   | GC LM02        |       |              |              |    |
| 3.798314e-38 | 0.3879964      | 0.833 | 0.649        | 6.772014e-34 | 16 |
| ATP5F1A      | GC LM02        |       |              |              |    |
| 4.079513e-38 | 0.4575638      | 0.474 | 0.27         | 7.273364e-34 | 16 |
| SEPT2        | GC LM02        |       |              |              |    |
| 4.283755e-38 | 0.3818805      | 0.194 | 0.065        | 7.637506e-34 | 16 |
| MFHAS1       | GC LM02        |       |              |              |    |
| 5.265217e-38 | 0.387767 0.504 | 0.298 | 9.387355e-34 | 16           |    |
| ODC1         | GC LM02        |       |              |              |    |
| 5.934012e-38 | -0.6546867     | 0.474 | 0.624        | 1.057975e-33 | 16 |
| SUB1         | GC LM02        |       |              |              |    |
| 6.456624e-38 | 0.3161734      | 0.122 | 0.026        | 1.151151e-33 | 16 |
| LHFPL2       | GC LM02        |       |              |              |    |
| 1.270405e-37 | 0.4050618      | 0.189 | 0.059        | 2.265006e-33 | 16 |
| PCED1B       | GC LM02        |       |              |              |    |
| 1.331474e-37 | 0.3248153      | 0.853 | 0.652        | 2.373885e-33 | 16 |
| PSMB1        | GC LM02        |       |              |              |    |

|              |                |       |       |              |    |
|--------------|----------------|-------|-------|--------------|----|
| 1.81822e-37  | -0.3317253     | 0.997 | 0.998 | 3.241705e-33 | 16 |
| RPL19        | GC LM02        |       |       |              |    |
| 1.821294e-37 | 0.4148115      | 0.234 | 0.089 | 3.247186e-33 | 16 |
| FAM208B      | GC LM02        |       |       |              |    |
| 3.670481e-37 | 0.4519618      | 0.369 | 0.186 | 6.544101e-33 | 16 |
| MAP2K1       | GC LM02        |       |       |              |    |
| 4.836822e-37 | 0.4688599      | 0.325 | 0.162 | 8.623571e-33 | 16 |
| TOR3A        | GC LM02        |       |       |              |    |
| 7.331495e-37 | 0.4472105      | 0.676 | 0.443 | 1.307132e-32 | 16 |
| SEM1         | GC LM02        |       |       |              |    |
| 8.033875e-37 | 0.4388833      | 0.279 | 0.113 | 1.43236e-32  | 16 |
| KLHL5        | GC LM02        |       |       |              |    |
| 8.056383e-37 | 0.4804734      | 0.539 | 0.319 | 1.436373e-32 | 16 |
| BLNK         | GC LM02        |       |       |              |    |
| 8.855053e-37 | -0.6057391     | 0.043 | 0.174 | 1.578767e-32 | 16 |
| BCL2         | GC LM02        |       |       |              |    |
| 1.593143e-36 | 0.4035594      | 0.237 | 0.084 | 2.840414e-32 | 16 |
| PTK2B        | GC LM02        |       |       |              |    |
| 1.620412e-36 | 0.3233526      | 0.816 | 0.635 | 2.889033e-32 | 16 |
| ANAPC16      | GC LM02        |       |       |              |    |
| 1.65959e-36  | 0.4527534      | 0.405 | 0.211 | 2.958882e-32 | 16 |
| DMAC1        | GC LM02        |       |       |              |    |
| 1.978568e-36 | 0.4736648      | 0.465 | 0.249 | 3.527589e-32 | 16 |
| MPC2         | GC LM02        |       |       |              |    |
| 2.095595e-36 | 0.4328557      | 0.282 | 0.119 | 3.736237e-32 | 16 |
| LM04         | GC LM02        |       |       |              |    |
| 3.112017e-36 | 0.3751427      | 0.78  | 0.554 | 5.548416e-32 | 16 |
| ATP5PF       | GC LM02        |       |       |              |    |
| 1.059177e-35 | -0.4830187     | 0.974 | 0.982 | 1.888407e-31 | 16 |
| RPSA         | GC LM02        |       |       |              |    |
| 1.490637e-35 | 0.4581681      | 0.419 | 0.222 | 2.657658e-31 | 16 |
| CYBC1        | GC LM02        |       |       |              |    |
| 1.713841e-35 | 0.4399682      | 0.273 | 0.1   | 3.055606e-31 | 16 |
| SORL1        | GC LM02        |       |       |              |    |
| 1.788989e-35 | 0.4130103      | 0.249 | 0.096 | 3.189588e-31 | 16 |
| TACC1        | GC LM02        |       |       |              |    |
| 1.822799e-35 | 0.4001751      | 0.703 | 0.464 | 3.249868e-31 | 16 |
| MTDH         | GC LM02        |       |       |              |    |
| 2.082107e-35 | 0.4469898      | 0.531 | 0.317 | 3.712189e-31 | 16 |
| GNB2         | GC LM02        |       |       |              |    |
| 2.319906e-35 | 0.441604 0.513 | 0.311 |       | 4.136161e-31 | 16 |
| SFT2D1       | GC LM02        |       |       |              |    |
| 3.369006e-35 | 0.4752552      | 0.414 | 0.205 | 6.006601e-31 | 16 |
| SYAP1        | GC LM02        |       |       |              |    |
| 3.522476e-35 | 0.4697962      | 0.513 | 0.311 | 6.280223e-31 | 16 |
| NDUFAF3      | GC LM02        |       |       |              |    |
| 4.669728e-35 | 0.4754468      | 0.495 | 0.279 | 8.325658e-31 | 16 |
| CD82         | GC LM02        |       |       |              |    |
| 6.378716e-35 | 0.451288 0.332 | 0.167 |       | 1.137261e-30 | 16 |
| COMMD7       | GC LM02        |       |       |              |    |

|              |                |       |              |              |     |
|--------------|----------------|-------|--------------|--------------|-----|
| 6.432853e-35 | 0.4675791      | 0.275 | 0.124        | 1.146913e-30 | 16  |
| PRKD3        | GC LM02        |       |              |              |     |
| 7.237805e-35 | 0.3874366      | 0.778 | 0.549        | 1.290428e-30 | 16  |
| SEC61G       | GC LM02        |       |              |              |     |
| 7.904009e-35 | -0.7451566     | 0.35  | 0.495        | 1.409206e-30 | 16  |
| ANKRD12      | GC LM02        |       |              |              |     |
| 8.298864e-35 | 0.4950721      | 0.557 | 0.308        | 1.479605e-30 | 16  |
| HMG3         | GC LM02        |       |              |              |     |
| 8.503415e-35 | 0.4014717      | 0.241 | 0.091        | 1.516074e-30 | 16  |
| PDLIM2       | GC LM02        |       |              |              |     |
| 8.747542e-35 | 0.35618 0.767  | 0.551 | 1.559599e-30 | 16           |     |
| SNU13        | GC LM02        |       |              |              |     |
| 9.209745e-35 | -0.5364874     | 0.984 | 0.985        | 1.642005e-30 | 16  |
| TMSB10       | GC LM02        |       |              |              |     |
| 1.163435e-34 | 0.3572826      | 0.754 | 0.552        | 2.074288e-30 | 16  |
| PGK1         | GC LM02        |       |              |              |     |
| 1.312785e-34 | 0.4278454      | 0.502 | 0.299        | 2.340565e-30 | 16  |
| CHMP2A       | GC LM02        |       |              |              |     |
| 1.36543e-34  | 0.355978 0.165 | 0.047 | 2.434426e-30 | 16           |     |
| SYNE1        | GC LM02        |       |              |              |     |
| 1.539046e-34 | 0.4686912      | 0.348 | 0.171        | 2.743965e-30 | 16  |
| EHMT1        | GC LM02        |       |              |              |     |
| 2.296962e-34 | 0.4594668      | 0.553 | 0.333        | 4.095253e-30 | 16  |
| NDUFC1       | GC LM02        |       |              |              |     |
| 5.904421e-34 | 0.4098716      | 0.303 | 0.137        | 1.052699e-29 | 16  |
| COR01B       | GC LM02        |       |              |              |     |
| 7.421632e-34 | 0.4924349      | 0.512 | 0.284        | 1.323203e-29 | 16  |
| TUBA4A       | GC LM02        |       |              |              |     |
| 7.738609e-34 | 0.4306718      | 0.657 | 0.461        | 1.379717e-29 | 16  |
| PRDX6        | GC LM02        |       |              |              |     |
| 7.886637e-34 | 0.413794 0.463 | 0.261 | 1.406108e-29 | 16           | GRN |
|              | GC LM02        |       |              |              |     |
| 8.398292e-34 | 0.3638149      | 0.742 | 0.524        | 1.497331e-29 | 16  |
| SPCS2        | GC LM02        |       |              |              |     |
| 1.022341e-33 | 0.3819429      | 0.205 | 0.073        | 1.822732e-29 | 16  |
| RAB3GAP2     | GC LM02        |       |              |              |     |
| 1.196496e-33 | 0.4708656      | 0.398 | 0.205        | 2.133232e-29 | 16  |
| EHD1         | GC LM02        |       |              |              |     |
| 1.269651e-33 | 0.4778029      | 0.654 | 0.414        | 2.263661e-29 | 16  |
| AC114760.2   | GC LM02        |       |              |              |     |
| 1.572578e-33 | 0.4029138      | 0.447 | 0.259        | 2.80375e-29  | 16  |
| CD2BP2       | GC LM02        |       |              |              |     |
| 1.684212e-33 | -0.6191451     | 0.062 | 0.186        | 3.002782e-29 | 16  |
| PLPP5        | GC LM02        |       |              |              |     |
| 1.740572e-33 | 0.4166869      | 0.396 | 0.202        | 3.103267e-29 | 16  |
| ARHGEF1      | GC LM02        |       |              |              |     |
| 1.793711e-33 | 0.4440347      | 0.337 | 0.148        | 3.198008e-29 | 16  |
| CD72         | GC LM02        |       |              |              |     |
| 2.013911e-33 | 0.3769006      | 0.708 | 0.493        | 3.590602e-29 | 16  |
| COX5A        | GC LM02        |       |              |              |     |

|              |            |       |       |              |              |
|--------------|------------|-------|-------|--------------|--------------|
| 2.03542e-33  | 0.374423   | 0.667 | 0.451 | 3.62895e-29  | 16           |
| PPP4C        | GC LM02    |       |       |              |              |
| 2.874295e-33 | 0.3906156  |       | 0.208 | 0.082        | 5.12458e-29  |
| NCOA7        | GC LM02    |       |       |              | 16           |
| 3.125787e-33 | 0.3935122  |       | 0.482 | 0.273        | 5.572965e-29 |
| TANK         | GC LM02    |       |       |              | 16           |
| 3.782361e-33 | 0.4281539  |       | 0.557 | 0.359        | 6.743572e-29 |
| CPNE1        | GC LM02    |       |       |              | 16           |
| 3.848365e-33 | 0.3004186  |       | 0.851 | 0.673        | 6.861251e-29 |
| HNRNPA3      | GC LM02    |       |       |              | 16           |
| 3.9423e-33   | -0.5698004 |       | 0.039 | 0.152        | 7.028727e-29 |
| CELF2        | GC LM02    |       |       |              | 16           |
| 4.46018e-33  | 0.3581505  |       | 0.205 | 0.068        | 7.952054e-29 |
| FOXN3        | GC LM02    |       |       |              | 16           |
| 4.488717e-33 | 0.4311203  |       | 0.338 | 0.165        | 8.002933e-29 |
| CYB5R3       | GC LM02    |       |       |              | 16           |
| 4.502431e-33 | 0.4085415  |       | 0.41  | 0.217        | 8.027384e-29 |
| CAPN1        | GC LM02    |       |       |              | 16           |
| 4.662812e-33 | 0.454776   | 0.387 | 0.213 | 8.313328e-29 | 16           |
| IFI27L2      | GC LM02    |       |       |              |              |
| 4.700804e-33 | 0.3936808  |       | 0.639 | 0.417        | 8.381064e-29 |
| ECH1         | GC LM02    |       |       |              | 16           |
| 6.24905e-33  | 0.4061629  |       | 0.303 | 0.142        | 1.114143e-28 |
| PTEN         | GC LM02    |       |       |              | 16           |
| 6.250682e-33 | 0.4146177  |       | 0.379 | 0.197        | 1.114434e-28 |
| NUBP1        | GC LM02    |       |       |              | 16           |
| 6.511139e-33 | 0.4091076  |       | 0.262 | 0.109        | 1.160871e-28 |
| ZNF296       | GC LM02    |       |       |              | 16           |
| 6.515136e-33 | 0.3752129  |       | 0.678 | 0.471        | 1.161584e-28 |
| PRELID1      | GC LM02    |       |       |              | 16           |
| 8.81266e-33  | 0.3538696  |       | 0.197 | 0.073        | 1.571209e-28 |
| EZH2         | GC LM02    |       |       |              | 16           |
| 1.120509e-32 | 0.3993865  |       | 0.521 | 0.33         | 1.997756e-28 |
| NDUFS7       | GC LM02    |       |       |              | 16           |
| 1.206421e-32 | 0.444679   | 0.744 | 0.51  | 2.150928e-28 | 16           |
| LSP1         | GC LM02    |       |       |              |              |
| 1.343379e-32 | -0.6326986 |       | 0.165 | 0.3          | 2.39511e-28  |
| PDLIM1       | GC LM02    |       |       |              | 16           |
| 1.403972e-32 | 0.3328744  |       | 0.157 | 0.052        | 2.503142e-28 |
| KCTD9        | GC LM02    |       |       |              | 16           |
| 1.51244e-32  | 0.4283089  |       | 0.517 | 0.312        | 2.696529e-28 |
| SCAND1       | GC LM02    |       |       |              | 16           |
| 1.63736e-32  | 0.4303461  |       | 0.197 | 0.06         | 2.919249e-28 |
| SNX22        | GC LM02    |       |       |              | 16           |
| 1.768429e-32 | 0.3808559  |       | 0.565 | 0.387        | 3.152931e-28 |
| ARPC5L       | GC LM02    |       |       |              | 16           |
| 2.932635e-32 | -0.7203503 |       | 0.035 | 0.161        | 5.228595e-28 |
| LMNA         | GC LM02    |       |       |              | 16           |
| 3.129547e-32 | 0.3973739  |       | 0.527 | 0.324        | 5.57967e-28  |
| PPP2R1A      | GC LM02    |       |       |              | 16           |

|              |                |       |              |              |     |
|--------------|----------------|-------|--------------|--------------|-----|
| 3.393266e-32 | 0.3486368      | 0.185 | 0.066        | 6.049853e-28 | 16  |
| TRIM26       | GC LM02        |       |              |              |     |
| 3.427503e-32 | 0.3180705      | 0.147 | 0.041        | 6.110894e-28 | 16  |
| GCH1         | GC LM02        |       |              |              |     |
| 3.863316e-32 | 0.3773033      | 0.293 | 0.149        | 6.887906e-28 | 16  |
| PEA15        | GC LM02        |       |              |              |     |
| 6.095564e-32 | 0.5083744      | 0.269 | 0.128        | 1.086778e-27 | 16  |
| PHGDH        | GC LM02        |       |              |              |     |
| 6.147848e-32 | 0.388187 0.359 | 0.188 | 1.0961e-27   | 16           |     |
| FYTTD1       | GC LM02        |       |              |              |     |
| 6.927263e-32 | 0.4026268      | 0.439 | 0.239        | 1.235062e-27 | 16  |
| WAS          | GC LM02        |       |              |              |     |
| 7.027607e-32 | 0.4061725      | 0.424 | 0.239        | 1.252952e-27 | 16  |
| ETFA         | GC LM02        |       |              |              |     |
| 8.179588e-32 | 0.408555 0.227 | 0.085 | 1.458339e-27 | 16           |     |
| VEZT         | GC LM02        |       |              |              |     |
| 8.823352e-32 | -0.4924051     | 0.975 | 0.974        | 1.573115e-27 | 16  |
| MT-ND4       | GC LM02        |       |              |              |     |
| 9.241635e-32 | 0.3068227      | 0.142 | 0.043        | 1.647691e-27 | 16  |
| STK38L       | GC LM02        |       |              |              |     |
| 1.179863e-31 | 0.3017653      | 0.151 | 0.044        | 2.103578e-27 | 16  |
| LIMK1        | GC LM02        |       |              |              |     |
| 1.249223e-31 | 0.4162179      | 0.637 | 0.417        | 2.227239e-27 | 16  |
| TMEM123      | GC LM02        |       |              |              |     |
| 1.536264e-31 | 0.4076526      | 0.244 | 0.106        | 2.739005e-27 | 16  |
| NADK         | GC LM02        |       |              |              |     |
| 1.687505e-31 | 0.3910603      | 0.441 | 0.258        | 3.008652e-27 | 16  |
| MAPK1IP1L    | GC LM02        |       |              |              |     |
| 2.018627e-31 | 0.3951041      | 0.495 | 0.292        | 3.59901e-27  | 16  |
| TWF2         | GC LM02        |       |              |              |     |
| 2.030929e-31 | 0.3999941      | 0.367 | 0.19         | 3.620943e-27 | 16  |
| USF2         | GC LM02        |       |              |              |     |
| 2.794423e-31 | 0.427942 0.553 | 0.356 | 4.982178e-27 | 16           | TKT |
|              | GC LM02        |       |              |              |     |
| 3.191768e-31 | 0.3505889      | 0.208 | 0.08         | 5.690604e-27 | 16  |
| PARN         | GC LM02        |       |              |              |     |
| 4.085724e-31 | 0.4078114      | 0.278 | 0.123        | 7.284437e-27 | 16  |
| ZBTB20       | GC LM02        |       |              |              |     |
| 6.120412e-31 | 0.3486036      | 0.705 | 0.505        | 1.091208e-26 | 16  |
| PSMD8        | GC LM02        |       |              |              |     |
| 7.414846e-31 | 0.3620301      | 0.735 | 0.541        | 1.321993e-26 | 16  |
| UBE2D2       | GC LM02        |       |              |              |     |
| 8.425983e-31 | -0.4772156     | 0.017 | 0.102        | 1.502268e-26 | 16  |
| RHOC         | GC LM02        |       |              |              |     |
| 8.963136e-31 | 0.3777733      | 0.203 | 0.08         | 1.598038e-26 | 16  |
| COMMD10      | GC LM02        |       |              |              |     |
| 9.861631e-31 | 0.4110862      | 0.456 | 0.266        | 1.75823e-26  | 16  |
| ARF4         | GC LM02        |       |              |              |     |
| 1.14543e-30  | 0.4087296      | 0.632 | 0.415        | 2.042187e-26 | 16  |
| HNRNPD       | GC LM02        |       |              |              |     |

|              |            |       |       |              |    |
|--------------|------------|-------|-------|--------------|----|
| 1.158251e-30 | 0.3961827  | 0.406 | 0.23  | 2.065045e-26 | 16 |
| CNDP2        | GC LM02    |       |       |              |    |
| 1.372272e-30 | -0.3074656 | 0.997 | 0.998 | 2.446625e-26 | 16 |
| RPS15        | GC LM02    |       |       |              |    |
| 2.349861e-30 | 0.3956723  | 0.531 | 0.34  | 4.189568e-26 | 16 |
| SNX17        | GC LM02    |       |       |              |    |
| 2.502553e-30 | -0.8051944 | 0.078 | 0.2   | 4.461802e-26 | 16 |
| ACP5         | GC LM02    |       |       |              |    |
| 2.878555e-30 | 0.6650254  | 0.694 | 0.484 | 5.132175e-26 | 16 |
| LTB          | GC LM02    |       |       |              |    |
| 3.485085e-30 | 0.3954543  | 0.372 | 0.201 | 6.213558e-26 | 16 |
| PXK          | GC LM02    |       |       |              |    |
| 4.004811e-30 | -0.4837048 | 0.948 | 0.959 | 7.140177e-26 | 16 |
| MT-CYB       | GC LM02    |       |       |              |    |
| 4.64607e-30  | 0.3972156  | 0.501 | 0.301 | 8.283478e-26 | 16 |
| OCIAD2       | GC LM02    |       |       |              |    |
| 4.693999e-30 | 0.4057084  | 0.445 | 0.262 | 8.368931e-26 | 16 |
| PPP1R7       | GC LM02    |       |       |              |    |
| 4.728042e-30 | 0.3729558  | 0.259 | 0.112 | 8.429626e-26 | 16 |
| EBF1         | GC LM02    |       |       |              |    |
| 5.399118e-30 | -0.3349944 | 0.995 | 0.996 | 9.626087e-26 | 16 |
| RPS3         | GC LM02    |       |       |              |    |
| 5.557748e-30 | 0.4320725  | 0.615 | 0.405 | 9.908908e-26 | 16 |
| SEPT6        | GC LM02    |       |       |              |    |
| 5.595263e-30 | 0.4263684  | 0.273 | 0.118 | 9.975794e-26 | 16 |
| EPS15        | GC LM02    |       |       |              |    |
| 6.067037e-30 | 0.4035105  | 0.542 | 0.341 | 1.081692e-25 | 16 |
| LSM6         | GC LM02    |       |       |              |    |
| 6.294754e-30 | 0.4028086  | 0.391 | 0.213 | 1.122292e-25 | 16 |
| SMAP2        | GC LM02    |       |       |              |    |
| 6.311181e-30 | 0.4090349  | 0.307 | 0.143 | 1.12522e-25  | 16 |
| MGMT         | GC LM02    |       |       |              |    |
| 6.8809e-30   | 0.3888362  | 0.327 | 0.169 | 1.226796e-25 | 16 |
| SNX8         | GC LM02    |       |       |              |    |
| 7.0319e-30   | 0.384864   | 0.36  | 0.189 | 1.253717e-25 | 16 |
| RFXANK       | GC LM02    |       |       |              |    |
| 7.224673e-30 | 0.4086715  | 0.501 | 0.279 | 1.288087e-25 | 16 |
| CARHSP1      | GC LM02    |       |       |              |    |
| 9.22978e-30  | 0.3796944  | 0.804 | 0.628 | 1.645578e-25 | 16 |
| GSTP1        | GC LM02    |       |       |              |    |
| 1.210267e-29 | 0.3947079  | 0.456 | 0.268 | 2.157785e-25 | 16 |
| NKTR         | GC LM02    |       |       |              |    |
| 1.294488e-29 | 0.3725619  | 0.602 | 0.407 | 2.307943e-25 | 16 |
| MDH1         | GC LM02    |       |       |              |    |
| 1.356541e-29 | 0.3606944  | 0.175 | 0.059 | 2.418577e-25 | 16 |
| FANCA        | GC LM02    |       |       |              |    |
| 1.413956e-29 | -0.7227135 | 0.236 | 0.383 | 2.520942e-25 | 16 |
| PDCD4        | GC LM02    |       |       |              |    |
| 1.552116e-29 | 0.3992685  | 0.316 | 0.152 | 2.767267e-25 | 16 |
| ACAP2        | GC LM02    |       |       |              |    |

|              |                |       |              |              |    |
|--------------|----------------|-------|--------------|--------------|----|
| 1.780155e-29 | 0.3899918      | 0.403 | 0.218        | 3.173838e-25 | 16 |
| SKAP2        | GC LM02        |       |              |              |    |
| 1.813758e-29 | 0.3861189      | 0.306 | 0.144        | 3.23375e-25  | 16 |
| ZNF580       | GC LM02        |       |              |              |    |
| 2.099659e-29 | 0.3985868      | 0.226 | 0.096        | 3.743482e-25 | 16 |
| SYVN1        | GC LM02        |       |              |              |    |
| 2.390193e-29 | 0.3443086      | 0.163 | 0.061        | 4.261474e-25 | 16 |
| IL21R        | GC LM02        |       |              |              |    |
| 2.570899e-29 | 0.3158393      | 0.826 | 0.653        | 4.583656e-25 | 16 |
| RBX1         | GC LM02        |       |              |              |    |
| 2.728295e-29 | 0.3807062      | 0.654 | 0.428        | 4.864277e-25 | 16 |
| CYB561A3     | GC LM02        |       |              |              |    |
| 3.353757e-29 | 0.396397 0.337 | 0.161 | 5.979414e-25 | 16           |    |
| PPP1R18      | GC LM02        |       |              |              |    |
| 3.464092e-29 | 0.317221 0.88  | 0.699 | 6.17613e-25  | 16           |    |
| COMMD6       | GC LM02        |       |              |              |    |
| 3.853318e-29 | 0.423935 0.361 | 0.192 | 6.87008e-25  | 16           |    |
| UBE2E1       | GC LM02        |       |              |              |    |
| 4.787945e-29 | 0.3686286      | 0.694 | 0.498        | 8.536427e-25 | 16 |
| GNG5         | GC LM02        |       |              |              |    |
| 4.814561e-29 | 0.3912441      | 0.427 | 0.245        | 8.58388e-25  | 16 |
| THOC2        | GC LM02        |       |              |              |    |
| 4.900268e-29 | 0.3137708      | 0.81  | 0.628        | 8.736689e-25 | 16 |
| EIF3H        | GC LM02        |       |              |              |    |
| 5.522894e-29 | 0.3714926      | 0.213 | 0.089        | 9.846768e-25 | 16 |
| MSH6         | GC LM02        |       |              |              |    |
| 5.576909e-29 | -0.4409647     | 0.981 | 0.98         | 9.943072e-25 | 16 |
| RPL7A        | GC LM02        |       |              |              |    |
| 5.763585e-29 | 0.7527981      | 0.329 | 0.178        | 1.02759e-24  | 16 |
| XBP1         | GC LM02        |       |              |              |    |
| 6.129218e-29 | 0.3898682      | 0.336 | 0.172        | 1.092778e-24 | 16 |
| ZNF428       | GC LM02        |       |              |              |    |
| 6.37496e-29  | 0.381588 0.447 | 0.259 | 1.136592e-24 | 16           |    |
| THOC7        | GC LM02        |       |              |              |    |
| 6.550331e-29 | 0.3809005      | 0.575 | 0.379        | 1.167859e-24 | 16 |
| JAK1         | GC LM02        |       |              |              |    |
| 7.069391e-29 | 0.374983 0.281 | 0.133 | 1.260402e-24 | 16           |    |
| GTF2E2       | GC LM02        |       |              |              |    |
| 8.075595e-29 | 0.3383103      | 0.206 | 0.082        | 1.439798e-24 | 16 |
| CCDC88C      | GC LM02        |       |              |              |    |
| 8.648773e-29 | 0.4652201      | 0.343 | 0.173        | 1.54199e-24  | 16 |
| BCL2A1       | GC LM02        |       |              |              |    |
| 9.970753e-29 | 0.3471254      | 0.172 | 0.06         | 1.777686e-24 | 16 |
| DTX1         | GC LM02        |       |              |              |    |
| 1.387477e-28 | 0.3570892      | 0.6   | 0.381        | 2.473732e-24 | 16 |
| NDUFB3       | GC LM02        |       |              |              |    |
| 1.394448e-28 | 0.3271395      | 0.759 | 0.562        | 2.486162e-24 | 16 |
| RAC1         | GC LM02        |       |              |              |    |
| 1.489045e-28 | 0.374312 0.192 | 0.073 | 2.654819e-24 | 16           |    |
| DNASE1       | GC LM02        |       |              |              |    |



|              |                |       |       |              |    |
|--------------|----------------|-------|-------|--------------|----|
| 2.006891e-28 | 0.3898017      | 0.231 | 0.098 | 3.578086e-24 | 16 |
| PTPN7        | GC LM02        |       |       |              |    |
| 2.070473e-28 | 0.386831 0.413 | 0.238 |       | 3.691447e-24 | 16 |
| CEP57        | GC LM02        |       |       |              |    |
| 2.367168e-28 | 0.4086508      | 0.29  | 0.138 | 4.220424e-24 | 16 |
| IN080C       | GC LM02        |       |       |              |    |
| 2.534915e-28 | 0.3442439      | 0.187 | 0.072 | 4.5195e-24   | 16 |
| CUX1         | GC LM02        |       |       |              |    |
| 3.086233e-28 | 0.3720147      | 0.241 | 0.111 | 5.502445e-24 | 16 |
| NIN          | GC LM02        |       |       |              |    |
| 3.112132e-28 | 0.3318793      | 0.14  | 0.046 | 5.548619e-24 | 16 |
| LRRK1        | GC LM02        |       |       |              |    |
| 3.333653e-28 | -0.4553539     | 0.034 | 0.128 | 5.94357e-24  | 16 |
| ZEB2         | GC LM02        |       |       |              |    |
| 3.666814e-28 | 0.3834766      | 0.454 | 0.249 | 6.537563e-24 | 16 |
| TBC1D10C     | GC LM02        |       |       |              |    |
| 4.123759e-28 | 0.3963316      | 0.346 | 0.176 | 7.35225e-24  | 16 |
| LYL1         | GC LM02        |       |       |              |    |
| 4.979548e-28 | 0.3623689      | 0.345 | 0.179 | 8.878037e-24 | 16 |
| MAP2K2       | GC LM02        |       |       |              |    |
| 5.526765e-28 | 0.4392478      | 0.301 | 0.137 | 9.853669e-24 | 16 |
| MKNK2        | GC LM02        |       |       |              |    |
| 5.764431e-28 | -0.5729229     | 0.676 | 0.754 | 1.02774e-23  | 16 |
| TOMM7        | GC LM02        |       |       |              |    |
| 5.956377e-28 | 0.3544365      | 0.527 | 0.324 | 1.061962e-23 | 16 |
| CCNDBP1      | GC LM02        |       |       |              |    |
| 6.448036e-28 | 0.3806212      | 0.437 | 0.258 | 1.14962e-23  | 16 |
| ATXN10       | GC LM02        |       |       |              |    |
| 7.243723e-28 | -0.6624142     | 0.208 | 0.332 | 1.291483e-23 | 16 |
| SMC6         | GC LM02        |       |       |              |    |
| 7.495236e-28 | 0.3329305      | 0.691 | 0.486 | 1.336326e-23 | 16 |
| SF3B6        | GC LM02        |       |       |              |    |
| 8.879605e-28 | 0.4368723      | 0.263 | 0.11  | 1.583145e-23 | 16 |
| TNFRSF17     | GC LM02        |       |       |              |    |
| 1.034279e-27 | 0.3956146      | 0.27  | 0.124 | 1.844015e-23 | 16 |
| SASH3        | GC LM02        |       |       |              |    |
| 1.096109e-27 | 0.3523608      | 0.429 | 0.245 | 1.954254e-23 | 16 |
| SHOC2        | GC LM02        |       |       |              |    |
| 1.503519e-27 | 0.3441549      | 0.621 | 0.436 | 2.680624e-23 | 16 |
| ACTR2        | GC LM02        |       |       |              |    |
| 1.667759e-27 | 0.3663301      | 0.487 | 0.304 | 2.973448e-23 | 16 |
| MMADHC       | GC LM02        |       |       |              |    |
| 1.856361e-27 | -0.3263746     | 0.998 | 0.996 | 3.309705e-23 | 16 |
| RPS13        | GC LM02        |       |       |              |    |
| 1.976294e-27 | 0.403804 0.243 | 0.11  |       | 3.523535e-23 | 16 |
| BRI3BP       | GC LM02        |       |       |              |    |
| 2.156218e-27 | 0.3795189      | 0.331 | 0.161 | 3.844321e-23 | 16 |
| SCPEP1       | GC LM02        |       |       |              |    |
| 2.188122e-27 | 0.3759462      | 0.396 | 0.23  | 3.901203e-23 | 16 |
| MRPL27       | GC LM02        |       |       |              |    |

|              |                |       |              |              |    |
|--------------|----------------|-------|--------------|--------------|----|
| 2.213188e-27 | 0.3869696      | 0.262 | 0.118        | 3.945892e-23 | 16 |
| TFEB         | GC LM02        |       |              |              |    |
| 2.508159e-27 | 0.3355634      | 0.186 | 0.072        | 4.471797e-23 | 16 |
| MPZL1        | GC LM02        |       |              |              |    |
| 2.515343e-27 | 0.3552751      | 0.518 | 0.323        | 4.484606e-23 | 16 |
| PTPN6        | GC LM02        |       |              |              |    |
| 2.655021e-27 | -0.6239266     | 0.128 | 0.24         | 4.733636e-23 | 16 |
| CD55         | GC LM02        |       |              |              |    |
| 2.787424e-27 | 0.3751834      | 0.473 | 0.282        | 4.969698e-23 | 16 |
| GSTK1        | GC LM02        |       |              |              |    |
| 3.388976e-27 | 0.3276921      | 0.707 | 0.515        | 6.042205e-23 | 16 |
| PSMB6        | GC LM02        |       |              |              |    |
| 3.427604e-27 | 0.364353 0.477 | 0.299 | 6.111075e-23 | 16           |    |
| COPS6        | GC LM02        |       |              |              |    |
| 5.246015e-27 | -0.5974287     | 0.752 | 0.817        | 9.35312e-23  | 16 |
| NOP53        | GC LM02        |       |              |              |    |
| 5.678334e-27 | 0.3821417      | 0.486 | 0.306        | 1.01239e-22  | 16 |
| SCP2         | GC LM02        |       |              |              |    |
| 6.115746e-27 | -0.5345864     | 0.098 | 0.193        | 1.090376e-22 | 16 |
| S1PR4        | GC LM02        |       |              |              |    |
| 6.693695e-27 | 0.3525742      | 0.573 | 0.375        | 1.193419e-22 | 16 |
| POLR2G       | GC LM02        |       |              |              |    |
| 7.223691e-27 | -0.6882256     | 0.2   | 0.305        | 1.287912e-22 | 16 |
| ZFP36L2      | GC LM02        |       |              |              |    |
| 7.983373e-27 | 0.3508044      | 0.337 | 0.181        | 1.423356e-22 | 16 |
| NAPA         | GC LM02        |       |              |              |    |
| 8.456733e-27 | 0.3623935      | 0.256 | 0.116        | 1.507751e-22 | 16 |
| SS18         | GC LM02        |       |              |              |    |
| 9.038208e-27 | -0.6217141     | 0.109 | 0.214        | 1.611422e-22 | 16 |
| LBH          | GC LM02        |       |              |              |    |
| 1.099862e-26 | -0.4589121     | 0.029 | 0.114        | 1.960943e-22 | 16 |
| P2RY10       | GC LM02        |       |              |              |    |
| 1.341253e-26 | 0.3457747      | 0.633 | 0.418        | 2.391319e-22 | 16 |
| GABARAPL2    | GC LM02        |       |              |              |    |
| 1.495537e-26 | 0.3660336      | 0.333 | 0.178        | 2.666394e-22 | 16 |
| TADA3        | GC LM02        |       |              |              |    |
| 1.515602e-26 | 0.3957205      | 0.389 | 0.225        | 2.702168e-22 | 16 |
| NGLY1        | GC LM02        |       |              |              |    |
| 1.546804e-26 | 0.3002056      | 0.143 | 0.048        | 2.757796e-22 | 16 |
| PEX5         | GC LM02        |       |              |              |    |
| 1.768972e-26 | -0.4526831     | 0.02  | 0.107        | 3.1539e-22   | 16 |
| MTSS1        | GC LM02        |       |              |              |    |
| 1.870684e-26 | -0.6798452     | 0.287 | 0.417        | 3.335242e-22 | 16 |
| NPC2         | GC LM02        |       |              |              |    |
| 2.146352e-26 | 0.3266983      | 0.643 | 0.441        | 3.826731e-22 | 16 |
| NDUFB10      | GC LM02        |       |              |              |    |
| 2.153712e-26 | 0.3411855      | 0.277 | 0.139        | 3.839854e-22 | 16 |
| FAM207A      | GC LM02        |       |              |              |    |
| 2.290354e-26 | 0.3158661      | 0.189 | 0.079        | 4.083472e-22 | 16 |
| PDZD11       | GC LM02        |       |              |              |    |

|              |                |       |       |              |    |
|--------------|----------------|-------|-------|--------------|----|
| 3.483655e-26 | 0.3579961      | 0.237 | 0.107 | 6.211008e-22 | 16 |
| PTS          | GC LM02        |       |       |              |    |
| 3.61511e-26  | -0.492623      | 0.926 | 0.934 | 6.445381e-22 | 16 |
| MT-ATP6      | GC LM02        |       |       |              |    |
| 4.506499e-26 | 0.3769832      | 0.291 | 0.152 | 8.034638e-22 | 16 |
| SMAP1        | GC LM02        |       |       |              |    |
| 4.795824e-26 | 0.3700835      | 0.257 | 0.121 | 8.550475e-22 | 16 |
| TLE4         | GC LM02        |       |       |              |    |
| 5.190827e-26 | 0.357109 0.562 | 0.384 |       | 9.254726e-22 | 16 |
| CUTA         | GC LM02        |       |       |              |    |
| 1.036611e-25 | 0.3800121      | 0.538 | 0.361 | 1.848175e-21 | 16 |
| PDIA3        | GC LM02        |       |       |              |    |
| 1.062191e-25 | 0.3761845      | 0.423 | 0.245 | 1.89378e-21  | 16 |
| PPP2R5C      | GC LM02        |       |       |              |    |
| 1.094091e-25 | 0.3680295      | 0.343 | 0.179 | 1.950654e-21 | 16 |
| INPP5D       | GC LM02        |       |       |              |    |
| 1.180293e-25 | 0.3506915      | 0.206 | 0.082 | 2.104344e-21 | 16 |
| TMEM131L     | GC LM02        |       |       |              |    |
| 1.233546e-25 | 0.3277117      | 0.205 | 0.089 | 2.199289e-21 | 16 |
| PPP6R1       | GC LM02        |       |       |              |    |
| 2.203386e-25 | -0.5100229     | 0.109 | 0.221 | 3.928417e-21 | 16 |
| CCDC50       | GC LM02        |       |       |              |    |
| 2.627382e-25 | 0.3536577      | 0.397 | 0.233 | 4.68436e-21  | 16 |
| DCXR         | GC LM02        |       |       |              |    |
| 3.225708e-25 | 0.419796 0.337 | 0.186 |       | 5.751114e-21 | 16 |
| RFC1         | GC LM02        |       |       |              |    |
| 3.682895e-25 | 0.3143937      | 0.216 | 0.102 | 6.566234e-21 | 16 |
| SLC25A4      | GC LM02        |       |       |              |    |
| 4.732643e-25 | 0.3018542      | 0.829 | 0.665 | 8.437829e-21 | 16 |
| GDI2         | GC LM02        |       |       |              |    |
| 6.219685e-25 | -0.3901897     | 0.984 | 0.982 | 1.108908e-20 | 16 |
| RPS11        | GC LM02        |       |       |              |    |
| 6.500159e-25 | -0.4482066     | 0.98  | 0.981 | 1.158913e-20 | 16 |
| RPL5         | GC LM02        |       |       |              |    |
| 1.224172e-24 | 0.389275 0.384 | 0.225 |       | 2.182576e-20 | 16 |
| HDDC2        | GC LM02        |       |       |              |    |
| 1.23653e-24  | 0.3158309      | 0.198 | 0.085 | 2.20461e-20  | 16 |
| FAF1         | GC LM02        |       |       |              |    |
| 1.238007e-24 | 0.3257487      | 0.347 | 0.181 | 2.207243e-20 | 16 |
| NECAP2       | GC LM02        |       |       |              |    |
| 1.697823e-24 | 0.3284246      | 0.556 | 0.341 | 3.027049e-20 | 16 |
| H2AFY        | GC LM02        |       |       |              |    |
| 1.769163e-24 | 0.3069429      | 0.678 | 0.491 | 3.154241e-20 | 16 |
| ARGLU1       | GC LM02        |       |       |              |    |
| 1.792979e-24 | 0.3593595      | 0.318 | 0.17  | 3.196702e-20 | 16 |
| AKIRIN2      | GC LM02        |       |       |              |    |
| 1.993654e-24 | -0.4818245     | 0.947 | 0.963 | 3.554487e-20 | 16 |
| FTL          | GC LM02        |       |       |              |    |
| 2.178958e-24 | 0.3530129      | 0.42  | 0.244 | 3.884864e-20 | 16 |
| SNRPN        | GC LM02        |       |       |              |    |

|              |                |       |              |              |    |
|--------------|----------------|-------|--------------|--------------|----|
| 2.306126e-24 | 0.3594894      | 0.411 | 0.24         | 4.111591e-20 | 16 |
| CCDC115      | GC LM02        |       |              |              |    |
| 2.319467e-24 | -0.3560378     | 0.016 | 0.1          | 4.135379e-20 | 16 |
| PARVB        | GC LM02        |       |              |              |    |
| 2.424215e-24 | 0.3430203      | 0.524 | 0.342        | 4.322134e-20 | 16 |
| UBE2A        | GC LM02        |       |              |              |    |
| 2.86638e-24  | 0.3665246      | 0.45  | 0.266        | 5.110469e-20 | 16 |
| SEPT9        | GC LM02        |       |              |              |    |
| 3.176941e-24 | 0.34248 0.323  | 0.174 | 5.664169e-20 | 16           |    |
| PMVK         | GC LM02        |       |              |              |    |
| 3.251931e-24 | 0.3048584      | 0.204 | 0.087        | 5.797868e-20 | 16 |
| SREBF2       | GC LM02        |       |              |              |    |
| 3.738746e-24 | 0.3241875      | 0.463 | 0.28         | 6.665811e-20 | 16 |
| RTF2         | GC LM02        |       |              |              |    |
| 3.887187e-24 | 0.3505385      | 0.535 | 0.35         | 6.930466e-20 | 16 |
| DGUOK        | GC LM02        |       |              |              |    |
| 4.25039e-24  | 0.3344716      | 0.202 | 0.093        | 7.57802e-20  | 16 |
| UBR5         | GC LM02        |       |              |              |    |
| 4.286614e-24 | 0.3608528      | 0.492 | 0.284        | 7.642604e-20 | 16 |
| DCK          | GC LM02        |       |              |              |    |
| 4.936988e-24 | 0.3196881      | 0.309 | 0.169        | 8.802155e-20 | 16 |
| CLTB         | GC LM02        |       |              |              |    |
| 6.195127e-24 | 0.313241 0.188 | 0.076 | 1.104529e-19 | 16           |    |
| FAM45A       | GC LM02        |       |              |              |    |
| 6.529212e-24 | 0.3335849      | 0.302 | 0.161        | 1.164093e-19 | 16 |
| WDR61        | GC LM02        |       |              |              |    |
| 6.898055e-24 | 0.4233647      | 0.206 | 0.092        | 1.229854e-19 | 16 |
| PXMP2        | GC LM02        |       |              |              |    |
| 7.006079e-24 | 0.3012849      | 0.394 | 0.236        | 1.249114e-19 | 16 |
| MRPL15       | GC LM02        |       |              |              |    |
| 7.910319e-24 | 0.3284952      | 0.688 | 0.498        | 1.410331e-19 | 16 |
| RTRAF        | GC LM02        |       |              |              |    |
| 1.329112e-23 | 0.315836 0.253 | 0.118 | 2.369673e-19 | 16           |    |
| NCK1         | GC LM02        |       |              |              |    |
| 1.505155e-23 | 0.3153483      | 0.185 | 0.073        | 2.683541e-19 | 16 |
| OTUD1        | GC LM02        |       |              |              |    |
| 2.150339e-23 | 0.3361699      | 0.335 | 0.17         | 3.833839e-19 | 16 |
| BLCAP        | GC LM02        |       |              |              |    |
| 2.258919e-23 | 0.3003 0.711   | 0.527 | 4.027428e-19 | 16           |    |
| PAIP2        | GC LM02        |       |              |              |    |
| 2.519144e-23 | 0.3118804      | 0.27  | 0.145        | 4.491381e-19 | 16 |
| UBQLN1       | GC LM02        |       |              |              |    |
| 2.742765e-23 | 0.3121462      | 0.263 | 0.133        | 4.890076e-19 | 16 |
| DPP3         | GC LM02        |       |              |              |    |
| 2.798797e-23 | 0.3168468      | 0.486 | 0.299        | 4.989975e-19 | 16 |
| UGP2         | GC LM02        |       |              |              |    |
| 2.914455e-23 | 0.3332981      | 0.55  | 0.373        | 5.196182e-19 | 16 |
| SUPT4H1      | GC LM02        |       |              |              |    |
| 3.058029e-23 | 0.3129653      | 0.493 | 0.321        | 5.45216e-19  | 16 |
| SPAG7        | GC LM02        |       |              |              |    |

|              |                |       |              |              |    |
|--------------|----------------|-------|--------------|--------------|----|
| 3.364419e-23 | 0.3490149      | 0.316 | 0.173        | 5.998423e-19 | 16 |
| EIF4E2       | GC LM02        |       |              |              |    |
| 3.489741e-23 | 0.3111488      | 0.582 | 0.4          | 6.22186e-19  | 16 |
| PSMB2        | GC LM02        |       |              |              |    |
| 3.621321e-23 | 0.3476284      | 0.286 | 0.152        | 6.456454e-19 | 16 |
| GNB1         | GC LM02        |       |              |              |    |
| 4.218377e-23 | -0.3540673     | 0.995 | 0.992        | 7.520944e-19 | 16 |
| RPL18        | GC LM02        |       |              |              |    |
| 4.282076e-23 | 0.3528409      | 0.265 | 0.134        | 7.634513e-19 | 16 |
| CLIC4        | GC LM02        |       |              |              |    |
| 5.369033e-23 | -0.6281387     | 0.063 | 0.174        | 9.572449e-19 | 16 |
| TNFRSF18     | GC LM02        |       |              |              |    |
| 5.642575e-23 | 0.3559516      | 0.403 | 0.244        | 1.006015e-18 | 16 |
| OTUB1        | GC LM02        |       |              |              |    |
| 5.66347e-23  | -0.483465      | 0.071 | 0.16         | 1.00974e-18  | 16 |
| TGIF1        | GC LM02        |       |              |              |    |
| 5.882546e-23 | 0.3564707      | 0.497 | 0.316        | 1.048799e-18 | 16 |
| AP3S1        | GC LM02        |       |              |              |    |
| 6.138363e-23 | 0.3010821      | 0.58  | 0.398        | 1.094409e-18 | 16 |
| MDH2         | GC LM02        |       |              |              |    |
| 6.971139e-23 | 0.335639 0.366 | 0.208 | 1.242884e-18 | 16           |    |
| NR3C1        | GC LM02        |       |              |              |    |
| 8.787768e-23 | 0.3311483      | 0.514 | 0.343        | 1.566771e-18 | 16 |
| LAMTOR2      | GC LM02        |       |              |              |    |
| 9.731435e-23 | 0.345864 0.425 | 0.235 | 1.735018e-18 | 16           |    |
| SP140        | GC LM02        |       |              |              |    |
| 1.006652e-22 | 0.3176453      | 0.189 | 0.08         | 1.794759e-18 | 16 |
| N4BP3        | GC LM02        |       |              |              |    |
| 1.453043e-22 | 0.372775 0.422 | 0.265 | 2.590631e-18 | 16           |    |
| TXNDC17      | GC LM02        |       |              |              |    |
| 1.730019e-22 | 0.3867902      | 0.325 | 0.174        | 3.08445e-18  | 16 |
| PLIN3        | GC LM02        |       |              |              |    |
| 1.836053e-22 | 0.335935 0.287 | 0.151 | 3.273499e-18 | 16           |    |
| ATP6V1H      | GC LM02        |       |              |              |    |
| 2.502202e-22 | 0.3625066      | 0.286 | 0.14         | 4.461176e-18 | 16 |
| RAB30        | GC LM02        |       |              |              |    |
| 2.55692e-22  | 0.3032042      | 0.302 | 0.158        | 4.558733e-18 | 16 |
| RSU1         | GC LM02        |       |              |              |    |
| 2.62735e-22  | 0.313672 0.544 | 0.363 | 4.684303e-18 | 16           |    |
| EWSR1        | GC LM02        |       |              |              |    |
| 2.781844e-22 | 0.3287936      | 0.297 | 0.159        | 4.959749e-18 | 16 |
| ST6GAL1      | GC LM02        |       |              |              |    |
| 3.066104e-22 | 0.3086156      | 0.611 | 0.421        | 5.466558e-18 | 16 |
| TAF7         | GC LM02        |       |              |              |    |
| 4.101211e-22 | 0.3179482      | 0.358 | 0.21         | 7.31205e-18  | 16 |
| ACTR10       | GC LM02        |       |              |              |    |
| 4.730035e-22 | 0.3485457      | 0.531 | 0.352        | 8.433179e-18 | 16 |
| RAB11A       | GC LM02        |       |              |              |    |
| 8.74444e-22  | 0.3267777      | 0.573 | 0.396        | 1.559046e-17 | 16 |
| RAP1A        | GC LM02        |       |              |              |    |

|              |            |       |       |              |    |
|--------------|------------|-------|-------|--------------|----|
| 8.827456e-22 | 0.3773955  | 0.347 | 0.169 | 1.573847e-17 | 16 |
| TMEM156      | GC LM02    |       |       |              |    |
| 1.051113e-21 | -0.484706  | 0.199 | 0.29  | 1.87403e-17  | 16 |
| RUBCNL       | GC LM02    |       |       |              |    |
| 1.175188e-21 | -0.4400732 | 0.04  | 0.111 | 2.095243e-17 | 16 |
| LINC02397    | GC LM02    |       |       |              |    |
| 1.232016e-21 | 0.3282659  | 0.505 | 0.305 | 2.196561e-17 | 16 |
| CALM3        | GC LM02    |       |       |              |    |
| 1.484951e-21 | 0.3111961  | 0.16  | 0.065 | 2.64752e-17  | 16 |
| SYT17        | GC LM02    |       |       |              |    |
| 1.606338e-21 | 0.3002586  | 0.273 | 0.141 | 2.86394e-17  | 16 |
| FLOT1        | GC LM02    |       |       |              |    |
| 2.179632e-21 | 0.3157198  | 0.472 | 0.303 | 3.886065e-17 | 16 |
| SHKBP1       | GC LM02    |       |       |              |    |
| 2.527231e-21 | 0.3674096  | 0.296 | 0.143 | 4.505801e-17 | 16 |
| RBM38        | GC LM02    |       |       |              |    |
| 2.569021e-21 | 0.3205887  | 0.325 | 0.184 | 4.580308e-17 | 16 |
| DAXX         | GC LM02    |       |       |              |    |
| 2.722386e-21 | 0.3139368  | 0.333 | 0.191 | 4.853741e-17 | 16 |
| PAFAH1B1     | GC LM02    |       |       |              |    |
| 2.928449e-21 | 0.3475512  | 0.615 | 0.414 | 5.221131e-17 | 16 |
| NDUFA12      | GC LM02    |       |       |              |    |
| 3.277842e-21 | 0.3704778  | 0.314 | 0.157 | 5.844065e-17 | 16 |
| C12orf75     | GC LM02    |       |       |              |    |
| 3.572201e-21 | 0.3224556  | 0.338 | 0.194 | 6.368876e-17 | 16 |
| ETFB         | GC LM02    |       |       |              |    |
| 5.20042e-21  | -0.8037011 | 0.371 | 0.458 | 9.271829e-17 | 16 |
| JUNB         | GC LM02    |       |       |              |    |
| 5.696752e-21 | 0.3270769  | 0.437 | 0.285 | 1.015674e-16 | 16 |
| ZNHIT1       | GC LM02    |       |       |              |    |
| 5.94745e-21  | 0.312297   | 0.384 | 0.234 | 1.060371e-16 | 16 |
| TSG101       | GC LM02    |       |       |              |    |
| 9.404779e-21 | 0.3171895  | 0.225 | 0.109 | 1.676778e-16 | 16 |
| TMEM14A      | GC LM02    |       |       |              |    |
| 1.101729e-20 | 0.3132237  | 0.283 | 0.154 | 1.964273e-16 | 16 |
| VPS25        | GC LM02    |       |       |              |    |
| 1.188639e-20 | -0.3707847 | 0.968 | 0.971 | 2.119224e-16 | 16 |
| RPL22        | GC LM02    |       |       |              |    |
| 1.266026e-20 | 0.3240935  | 0.481 | 0.305 | 2.257198e-16 | 16 |
| PGLS         | GC LM02    |       |       |              |    |
| 1.288664e-20 | 0.3185517  | 0.294 | 0.166 | 2.297559e-16 | 16 |
| MTX1         | GC LM02    |       |       |              |    |
| 1.335147e-20 | 0.3250096  | 0.408 | 0.239 | 2.380434e-16 | 16 |
| SLBP         | GC LM02    |       |       |              |    |
| 1.73462e-20  | 0.3181094  | 0.537 | 0.366 | 3.092654e-16 | 16 |
| FAM96B       | GC LM02    |       |       |              |    |
| 2.118594e-20 | 0.3347206  | 0.38  | 0.225 | 3.777241e-16 | 16 |
| GTF2I        | GC LM02    |       |       |              |    |
| 2.894376e-20 | -0.8148777 | 0.305 | 0.411 | 5.160384e-16 | 16 |
| TXN          | GC LM02    |       |       |              |    |

|              |                |       |       |              |    |
|--------------|----------------|-------|-------|--------------|----|
| 3.701083e-20 | 0.3462913      | 0.335 | 0.204 | 6.59866e-16  | 16 |
| MRPS31       | GC LM02        |       |       |              |    |
| 3.729296e-20 | 0.404648 0.355 | 0.217 |       | 6.648961e-16 | 16 |
| TRAF4        | GC LM02        |       |       |              |    |
| 3.9603e-20   | 0.3586117      | 0.948 | 0.8   | 7.060819e-16 | 16 |
| RPS26        | GC LM02        |       |       |              |    |
| 4.06023e-20  | 0.344104 0.387 | 0.224 |       | 7.238984e-16 | 16 |
| NSMCE1       | GC LM02        |       |       |              |    |
| 4.307028e-20 | 0.3126527      | 0.242 | 0.111 | 7.679001e-16 | 16 |
| PAX5         | GC LM02        |       |       |              |    |
| 4.341544e-20 | 0.3252248      | 0.324 | 0.198 | 7.740539e-16 | 16 |
| LAGE3        | GC LM02        |       |       |              |    |
| 4.794737e-20 | 0.3252878      | 0.471 | 0.305 | 8.548537e-16 | 16 |
| FKBP3        | GC LM02        |       |       |              |    |
| 5.60479e-20  | 0.3245516      | 0.289 | 0.163 | 9.99278e-16  | 16 |
| COX11        | GC LM02        |       |       |              |    |
| 7.687979e-20 | 0.3110678      | 0.457 | 0.323 | 1.37069e-15  | 16 |
| PMAIP1       | GC LM02        |       |       |              |    |
| 8.775081e-20 | 0.3178924      | 0.217 | 0.114 | 1.564509e-15 | 16 |
| TMEM18       | GC LM02        |       |       |              |    |
| 8.973255e-20 | 0.3344851      | 0.304 | 0.178 | 1.599842e-15 | 16 |
| MCL1         | GC LM02        |       |       |              |    |
| 9.961153e-20 | 0.3362645      | 0.179 | 0.083 | 1.775974e-15 | 16 |
| RRBP1        | GC LM02        |       |       |              |    |
| 1.154508e-19 | 0.3187543      | 0.19  | 0.1   | 2.058372e-15 | 16 |
| AMZ2         | GC LM02        |       |       |              |    |
| 1.198319e-19 | 0.3150434      | 0.183 | 0.089 | 2.136483e-15 | 16 |
| XPNPEP1      | GC LM02        |       |       |              |    |
| 1.355804e-19 | 0.3300221      | 0.424 | 0.271 | 2.417263e-15 | 16 |
| RNF7         | GC LM02        |       |       |              |    |
| 1.389462e-19 | 0.3141219      | 0.241 | 0.101 | 2.477272e-15 | 16 |
| RMI2         | GC LM02        |       |       |              |    |
| 1.460505e-19 | 0.3233565      | 0.287 | 0.14  | 2.603934e-15 | 16 |
| HSH2D        | GC LM02        |       |       |              |    |
| 1.883048e-19 | 0.3515337      | 0.418 | 0.267 | 3.357286e-15 | 16 |
| SMS          | GC LM02        |       |       |              |    |
| 1.976764e-19 | 0.3541744      | 0.392 | 0.236 | 3.524373e-15 | 16 |
| PTRHD1       | GC LM02        |       |       |              |    |
| 2.12307e-19  | 0.339471 0.269 | 0.127 |       | 3.785222e-15 | 16 |
| STIM2        | GC LM02        |       |       |              |    |
| 2.293236e-19 | 0.3213111      | 0.316 | 0.182 | 4.08861e-15  | 16 |
| METTL23      | GC LM02        |       |       |              |    |
| 2.817457e-19 | 0.3078186      | 0.394 | 0.248 | 5.023244e-15 | 16 |
| MCTS1        | GC LM02        |       |       |              |    |
| 3.140517e-19 | 0.3751481      | 0.526 | 0.334 | 5.599229e-15 | 16 |
| SPIB         | GC LM02        |       |       |              |    |
| 3.15564e-19  | -0.4265978     | 0.041 | 0.107 | 5.626191e-15 | 16 |
| C1orf162     | GC LM02        |       |       |              |    |
| 3.39858e-19  | -0.3130761     | 0.991 | 0.991 | 6.059329e-15 | 16 |
| RPS20        | GC LM02        |       |       |              |    |

|              |               |       |              |              |    |
|--------------|---------------|-------|--------------|--------------|----|
| 3.513484e-19 | 0.3743015     | 0.209 | 0.081        | 6.264191e-15 | 16 |
| AICDA        | GC LM02       |       |              |              |    |
| 4.28778e-19  | 0.3434867     | 0.321 | 0.175        | 7.644683e-15 | 16 |
| MTERF4       | GC LM02       |       |              |              |    |
| 4.575704e-19 | 0.396319 0.27 | 0.145 | 8.158022e-15 | 16           |    |
| ALOX5        | GC LM02       |       |              |              |    |
| 6.867414e-19 | 0.3114279     | 0.352 | 0.217        | 1.224391e-14 | 16 |
| SMARCC1      | GC LM02       |       |              |              |    |
| 7.523268e-19 | 0.3785652     | 0.401 | 0.254        | 1.341323e-14 | 16 |
| MDM4         | GC LM02       |       |              |              |    |
| 2.104042e-18 | 0.3054385     | 0.328 | 0.198        | 3.751296e-14 | 16 |
| RELB         | GC LM02       |       |              |              |    |
| 3.440927e-18 | 0.3179071     | 0.172 | 0.071        | 6.134829e-14 | 16 |
| CDCA7        | GC LM02       |       |              |              |    |
| 4.739028e-18 | 0.3301474     | 0.429 | 0.266        | 8.449212e-14 | 16 |
| TOP1         | GC LM02       |       |              |              |    |
| 6.030828e-18 | 0.3172096     | 0.265 | 0.131        | 1.075236e-13 | 16 |
| PLEKHA2      | GC LM02       |       |              |              |    |
| 6.816097e-18 | -0.5122784    | 0.229 | 0.307        | 1.215242e-13 | 16 |
| ARHGAP24     | GC LM02       |       |              |              |    |
| 7.328139e-18 | -0.5622821    | 0.416 | 0.496        | 1.306534e-13 | 16 |
| SP100        | GC LM02       |       |              |              |    |
| 9.806387e-18 | -0.3762384    | 0.072 | 0.129        | 1.748381e-13 | 16 |
| CD24         | GC LM02       |       |              |              |    |
| 1.287348e-17 | -0.4375856    | 0.901 | 0.918        | 2.295213e-13 | 16 |
| PFDN5        | GC LM02       |       |              |              |    |
| 1.614719e-17 | 0.3073152     | 0.28  | 0.15         | 2.878882e-13 | 16 |
| MYL6B        | GC LM02       |       |              |              |    |
| 1.937801e-17 | 0.3051752     | 0.265 | 0.146        | 3.454905e-13 | 16 |
| SMARCA4      | GC LM02       |       |              |              |    |
| 2.474537e-17 | 0.3155508     | 0.401 | 0.255        | 4.411852e-13 | 16 |
| CNN2         | GC LM02       |       |              |              |    |
| 3.112931e-17 | -0.6872694    | 0.057 | 0.132        | 5.550044e-13 | 16 |
| MYC          | GC LM02       |       |              |              |    |
| 3.365344e-17 | 0.3001017     | 0.527 | 0.354        | 6.000071e-13 | 16 |
| TMEM243      | GC LM02       |       |              |              |    |
| 4.415458e-17 | 0.3129728     | 0.355 | 0.216        | 7.87232e-13  | 16 |
| GNAI2        | GC LM02       |       |              |              |    |
| 7.748111e-17 | 0.3532437     | 0.31  | 0.155        | 1.381411e-12 | 16 |
| KIAA0040     | GC LM02       |       |              |              |    |
| 1.031389e-16 | 0.3039675     | 0.456 | 0.305        | 1.838864e-12 | 16 |
| CALR         | GC LM02       |       |              |              |    |
| 1.177193e-15 | -0.5923409    | 0.38  | 0.48         | 2.098818e-11 | 16 |
| SQSTM1       | GC LM02       |       |              |              |    |
| 1.641978e-15 | -0.529691     | 0.653 | 0.697        | 2.927482e-11 | 16 |
| HNRNPDL      | GC LM02       |       |              |              |    |
| 5.623345e-15 | -0.6008781    | 0.25  | 0.123        | 1.002586e-10 | 16 |
| IGHG2        | GC LM02       |       |              |              |    |
| 7.806519e-15 | 0.3118876     | 0.335 | 0.201        | 1.391824e-10 | 16 |
| UBALD2       | GC LM02       |       |              |              |    |



|              |            |       |       |              |    |
|--------------|------------|-------|-------|--------------|----|
| 2.345156e-14 | -0.3294157 | 0.04  | 0.116 | 4.181179e-10 | 16 |
| PYCR1        | GC LM02    |       |       |              |    |
| 2.645612e-14 | -0.4499266 | 0.373 | 0.452 | 4.716862e-10 | 16 |
| DRAP1        | GC LM02    |       |       |              |    |
| 2.956841e-14 | -0.4199347 | 0.121 | 0.203 | 5.271752e-10 | 16 |
| NPM3         | GC LM02    |       |       |              |    |
| 3.087872e-14 | -0.5497331 | 0.221 | 0.297 | 5.505367e-10 | 16 |
| NFKBIA       | GC LM02    |       |       |              |    |
| 3.37467e-14  | -0.5508596 | 0.385 | 0.449 | 6.016699e-10 | 16 |
| PNRC1        | GC LM02    |       |       |              |    |
| 3.462032e-14 | -0.3154621 | 0.046 | 0.11  | 6.172457e-10 | 16 |
| HEXB         | GC LM02    |       |       |              |    |
| 8.190749e-14 | -0.4085244 | 0.752 | 0.777 | 1.460329e-09 | 16 |
| NAP1L1       | GC LM02    |       |       |              |    |
| 8.385149e-14 | -0.4323598 | 0.177 | 0.248 | 1.494988e-09 | 16 |
| CKS1B        | GC LM02    |       |       |              |    |
| 1.204756e-13 | -0.436872  | 0.575 | 0.621 | 2.147959e-09 | 16 |
| IFI16        | GC LM02    |       |       |              |    |
| 1.838504e-13 | -0.4275004 | 0.12  | 0.191 | 3.277868e-09 | 16 |
| IFNGR1       | GC LM02    |       |       |              |    |
| 2.827103e-13 | -0.3296733 | 0.871 | 0.882 | 5.040443e-09 | 16 |
| MT-ND1       | GC LM02    |       |       |              |    |
| 7.683961e-13 | -0.5461785 | 0.299 | 0.354 | 1.369973e-08 | 16 |
| TUBB4B       | GC LM02    |       |       |              |    |
| 1.216685e-12 | -0.3540439 | 0.057 | 0.119 | 2.169227e-08 | 16 |
| FCGR2B       | GC LM02    |       |       |              |    |
| 1.525238e-12 | -0.4491141 | 0.975 | 0.976 | 2.719346e-08 | 16 |
| FTH1         | GC LM02    |       |       |              |    |
| 1.665888e-12 | -0.3906809 | 0.145 | 0.204 | 2.970112e-08 | 16 |
| IRF1         | GC LM02    |       |       |              |    |
| 2.436925e-12 | -0.4453673 | 0.092 | 0.168 | 4.344794e-08 | 16 |
| CBX6         | GC LM02    |       |       |              |    |
| 2.488638e-12 | -0.4109526 | 0.171 | 0.233 | 4.436993e-08 | 16 |
| HSD17B11     | GC LM02    |       |       |              |    |
| 2.637678e-12 | -0.367099  | 0.126 | 0.195 | 4.702715e-08 | 16 |
| ADK          | GC LM02    |       |       |              |    |
| 3.15181e-12  | -0.3966195 | 0.188 | 0.253 | 5.619362e-08 | 16 |
| DNPH1        | GC LM02    |       |       |              |    |
| 5.621128e-12 | -0.3233355 | 0.071 | 0.121 | 1.002191e-07 | 16 |
| IL27RA       | GC LM02    |       |       |              |    |
| 5.667672e-12 | -0.3696522 | 0.103 | 0.176 | 1.010489e-07 | 16 |
| ASAH1        | GC LM02    |       |       |              |    |
| 5.685957e-12 | -0.5231761 | 0.262 | 0.347 | 1.013749e-07 | 16 |
| CAST         | GC LM02    |       |       |              |    |
| 9.972758e-12 | -0.3566336 | 0.089 | 0.149 | 1.778043e-07 | 16 |
| SVIP         | GC LM02    |       |       |              |    |
| 2.715381e-11 | -0.4386952 | 0.199 | 0.284 | 4.841252e-07 | 16 |
| MT-ND4L      | GC LM02    |       |       |              |    |
| 3.152466e-11 | -0.4518031 | 0.256 | 0.329 | 5.620532e-07 | 16 |
| ZFP36        | GC LM02    |       |       |              |    |

|              |            |       |       |              |    |
|--------------|------------|-------|-------|--------------|----|
| 3.43536e-11  | -0.3497395 | 0.093 | 0.151 | 6.124903e-07 | 16 |
| ESYT1        | GC LM02    |       |       |              |    |
| 3.473704e-11 | -0.3105655 | 0.096 | 0.158 | 6.193267e-07 | 16 |
| DDB2         | GC LM02    |       |       |              |    |
| 4.565923e-11 | -0.3283787 | 0.293 | 0.332 | 8.140584e-07 | 16 |
| TSTD1        | GC LM02    |       |       |              |    |
| 6.542395e-11 | -0.4009718 | 0.099 | 0.149 | 1.166444e-06 | 16 |
| ARRDC2       | GC LM02    |       |       |              |    |
| 9.348815e-11 | -0.4426295 | 0.735 | 0.769 | 1.6668e-06   | 16 |
| RPL17        | GC LM02    |       |       |              |    |
| 1.504578e-10 | -0.3169095 | 0.092 | 0.151 | 2.682512e-06 | 16 |
| CHD1         | GC LM02    |       |       |              |    |
| 2.077817e-10 | -0.4564947 | 0.427 | 0.481 | 3.704539e-06 | 16 |
| ISCU         | GC LM02    |       |       |              |    |
| 2.685356e-10 | -0.3491724 | 0.118 | 0.186 | 4.787721e-06 | 16 |
| FKBP4        | GC LM02    |       |       |              |    |
| 2.804189e-10 | -0.4311379 | 0.262 | 0.338 | 4.999589e-06 | 16 |
| APOBEC3C     | GC LM02    |       |       |              |    |
| 3.461968e-10 | -0.3350097 | 0.111 | 0.161 | 6.172343e-06 | 16 |
| AIDA         | GC LM02    |       |       |              |    |
| 3.952654e-10 | -0.3138471 | 0.053 | 0.11  | 7.047187e-06 | 16 |
| SNX9         | GC LM02    |       |       |              |    |
| 4.073977e-10 | -0.3870587 | 0.285 | 0.349 | 7.263493e-06 | 16 |
| LITAF        | GC LM02    |       |       |              |    |
| 4.476656e-10 | -0.3435547 | 0.136 | 0.175 | 7.98143e-06  | 16 |
| MARCH1       | GC LM02    |       |       |              |    |
| 5.068961e-10 | -0.3507397 | 0.146 | 0.227 | 9.03745e-06  | 16 |
| TMEM109      | GC LM02    |       |       |              |    |
| 6.866708e-10 | -0.3716998 | 0.127 | 0.184 | 1.224265e-05 | 16 |
| MBP          | GC LM02    |       |       |              |    |
| 7.106178e-10 | -0.3534388 | 0.239 | 0.299 | 1.26696e-05  | 16 |
| RNASEH2B     | GC LM02    |       |       |              |    |
| 8.072054e-10 | -0.3934646 | 0.133 | 0.201 | 1.439166e-05 | 16 |
| PPP3CA       | GC LM02    |       |       |              |    |
| 8.478419e-10 | -0.3093044 | 0.069 | 0.124 | 1.511617e-05 | 16 |
| RAB13        | GC LM02    |       |       |              |    |
| 9.491797e-10 | -0.3228593 | 0.139 | 0.2   | 1.692292e-05 | 16 |
| NENF         | GC LM02    |       |       |              |    |
| 1.008085e-09 | -0.418597  | 0.532 | 0.571 | 1.797316e-05 | 16 |
| SNX2         | GC LM02    |       |       |              |    |
| 1.413036e-09 | -0.656471  | 0.589 | 0.576 | 2.519302e-05 | 16 |
| TUBB         | GC LM02    |       |       |              |    |
| 1.960247e-09 | -0.4119432 | 0.1   | 0.159 | 3.494925e-05 | 16 |
| SLC2A3       | GC LM02    |       |       |              |    |
| 2.86575e-09  | -0.5051091 | 0.519 | 0.53  | 5.109346e-05 | 16 |
| PSME2        | GC LM02    |       |       |              |    |
| 4.046893e-09 | -0.7195471 | 0.394 | 0.404 | 7.215206e-05 | 16 |
| FABP5        | GC LM02    |       |       |              |    |
| 4.888056e-09 | -0.5222525 | 0.469 | 0.485 | 8.714915e-05 | 16 |
| RANBP1       | GC LM02    |       |       |              |    |

|              |            |       |       |              |    |
|--------------|------------|-------|-------|--------------|----|
| 4.999489e-09 | -0.3037121 | 0.968 | 0.96  | 8.91359e-05  | 16 |
| RPL23        | GC LM02    |       |       |              |    |
| 9.881036e-09 | -0.3255844 | 0.137 | 0.188 | 0.000176169  | 16 |
| KIF20B       | GC LM02    |       |       |              |    |
| 1.912953e-08 | -0.4592971 | 0.165 | 0.219 | 0.0003410603 | 16 |
| EIF4EBP1     | GC LM02    |       |       |              |    |
| 2.057691e-08 | -0.5033846 | 0.258 | 0.328 | 0.0003668658 | 16 |
| SLC3A2       | GC LM02    |       |       |              |    |
| 2.110501e-08 | -0.3342884 | 0.142 | 0.205 | 0.0003762813 | 16 |
| NDFIP1       | GC LM02    |       |       |              |    |
| 3.11933e-08  | -0.3250465 | 0.145 | 0.189 | 0.0005561453 | 16 |
| PCNA         | GC LM02    |       |       |              |    |
| 3.188165e-08 | -0.3141704 | 0.19  | 0.249 | 0.0005684179 | 16 |
| EXOSC8       | GC LM02    |       |       |              |    |
| 3.237412e-08 | -0.384318  | 0.285 | 0.343 | 0.0005771981 | 16 |
| PKIG         | GC LM02    |       |       |              |    |
| 1.443501e-07 | -0.3387359 | 0.312 | 0.359 | 0.002573619  | 16 |
| C8orf59      | GC LM02    |       |       |              |    |
| 1.512003e-07 | -0.3582542 | 0.443 | 0.476 | 0.00269575   | 16 |
| N4BP2L2      | GC LM02    |       |       |              |    |
| 3.294475e-07 | -0.3777126 | 0.302 | 0.337 | 0.005873719  | 16 |
| CD48         | GC LM02    |       |       |              |    |
| 7.0524e-07   | -0.3697251 | 0.09  | 0.138 | 0.01257372   | 16 |
| FCER2        | GC LM02    |       |       |              |    |
| 1.128503e-06 | -0.3879497 | 0.458 | 0.467 | 0.02012009   | 16 |
| ITM2B        | GC LM02    |       |       |              |    |
| 2.089322e-06 | -0.3459749 | 0.746 | 0.758 | 0.03725053   | 16 |
| MT-ND5       | GC LM02    |       |       |              |    |
| 2.132043e-06 | -0.50532   | 0.337 | 0.36  | 0.0380122    | 16 |
| ARID5B       | GC LM02    |       |       |              |    |
| 2.166832e-06 | -0.3571277 | 0.421 | 0.446 | 0.03863245   | 16 |
| FBL          | GC LM02    |       |       |              |    |
| 2.808273e-06 | -0.3143477 | 0.199 | 0.242 | 0.05006869   | 16 |
| HLA-F        | GC LM02    |       |       |              |    |
| 3.402929e-06 | -0.3248215 | 0.397 | 0.439 | 0.06067081   | 16 |
| IL2RG        | GC LM02    |       |       |              |    |
| 3.661866e-06 | 0.3426176  | 0.175 | 0.109 | 0.06528741   | 16 |
| CD9          | GC LM02    |       |       |              |    |
| 4.66416e-06  | -0.3550532 | 0.948 | 0.926 | 0.0831573    | 16 |
| HNRNPA1      | GC LM02    |       |       |              |    |
| 5.10203e-06  | -0.3314576 | 0.437 | 0.457 | 0.09096409   | 16 |
| LSM5         | GC LM02    |       |       |              |    |
| 5.633249e-06 | -0.3954738 | 0.25  | 0.281 | 0.1004352    | 16 |
| SRM          | GC LM02    |       |       |              |    |
| 9.98968e-06  | -0.3140437 | 0.174 | 0.233 | 0.178106     | 16 |
| TARS         | GC LM02    |       |       |              |    |
| 2.111751e-05 | -0.3677949 | 0.636 | 0.648 | 0.3765041    | 16 |
| ZFP36L1      | GC LM02    |       |       |              |    |
| 3.088079e-05 | -0.9714623 | 0.362 | 0.24  | 0.5505736    | 16 |
| IGHG4        | GC LM02    |       |       |              |    |

|               |            |       |       |               |            |
|---------------|------------|-------|-------|---------------|------------|
| 4.338318e-05  | -0.3073876 | 0.147 | 0.198 | 0.7734787     | 16         |
| TYMP          | GC LM02    |       |       |               |            |
| 4.828705e-05  | -0.4034703 | 0.223 | 0.257 | 0.8609098     | 16         |
| SRGN          | GC LM02    |       |       |               |            |
| 5.636614e-05  | -0.3067814 | 0.206 | 0.257 | 1             | 16         |
| NARS          | GC LM02    |       |       |               |            |
| 7.310974e-05  | -0.3620086 | 0.117 | 0.161 | 1             | 16         |
| DDIT4         | GC LM02    |       |       |               |            |
| 9.000649e-05  | -0.3730586 | 0.425 | 0.446 | 1             | 16         |
| KLF6          | GC LM02    |       |       |               |            |
| 0.0001004224  | -0.3040564 | 0.31  | 0.32  | 1             | 16         |
| LTA4H         | GC LM02    |       |       |               |            |
| 0.0001119412  | -0.3529631 | 0.448 | 0.453 | 1             | 16         |
| ARL6IP1       | GC LM02    |       |       |               |            |
| 0.0001594043  | -0.3034811 | 0.363 | 0.384 | 1             | 16         |
| LAPTM4A       | GC LM02    |       |       |               |            |
| 0.0002570859  | -0.3059357 | 0.376 | 0.402 | 1             | 16         |
| CMPK1         | GC LM02    |       |       |               |            |
| 0.0003289125  | -0.3972408 | 0.529 | 0.512 | 1             | 16         |
| PA2G4         | GC LM02    |       |       |               |            |
| 0.0004628302  | -0.6035095 | 0.184 | 0.206 | 1             | 16         |
| LGALS1        | GC LM02    |       |       |               |            |
| 0.001007032   | -0.4591621 | 0.517 | 0.499 | 1             | 16         |
| SSR4          | GC LM02    |       |       |               |            |
| 0.001359737   | -0.3093743 | 0.466 | 0.468 | 1             | 16         |
| CYCS          | GC LM02    |       |       |               |            |
| 0.00136348    | -0.5320158 | 0.51  | 0.426 | 1             | 16         |
| STMN1         | GC LM02    |       |       |               |            |
| 0.001379978   | -0.3556197 | 0.435 | 0.473 | 1             | 16         |
| SNHG8         | GC LM02    |       |       |               |            |
| 0             | 3.328184   | 0.933 | 0.058 | 0             | 17         |
|               |            |       |       | IGHA2         | Memory IgA |
| 0             | 2.582398   | 0.949 | 0.133 | 0             | 17         |
|               |            |       |       | IGHA1         | Memory IgA |
| 8.824468e-278 | -2.509407  | 0.554 | 0.913 | 1.573314e-273 | 17         |
| IGHM          | Memory IgA |       |       |               |            |
| 2.240009e-252 | -2.60336   | 0.116 | 0.665 | 3.993711e-248 | 17         |
| TCL1A         | Memory IgA |       |       |               |            |
| 2.020587e-198 | -1.978451  | 0.127 | 0.615 | 3.602504e-194 | 17         |
| IGHD          | Memory IgA |       |       |               |            |
| 1.060221e-194 | 0.5457432  | 1     | 0.998 | 1.890269e-190 | 17         |
| B2M           | Memory IgA |       |       |               |            |
| 1.936318e-183 | 1.976083   | 0.596 | 0.199 | 3.452261e-179 | 17         |
| LGALS1        | Memory IgA |       |       |               |            |
| 5.633453e-144 | 1.123452   | 0.695 | 0.296 | 1.004388e-139 | 17         |
| CD27          | Memory IgA |       |       |               |            |
| 2.455447e-106 | 1.049612   | 0.585 | 0.242 | 4.377817e-102 | 17         |
| TNFRSF13B     | Memory IgA |       |       |               |            |
| 6.169941e-103 | 0.547075   | 0.982 | 0.903 | 1.100039e-98  | 17         |
| HLA-A         | Memory IgA |       |       |               |            |
| 4.719752e-101 | 0.4304007  | 0.999 | 0.986 | 8.414847e-97  | 17         |
| HLA-B         | Memory IgA |       |       |               |            |

|              |                     |       |              |              |    |
|--------------|---------------------|-------|--------------|--------------|----|
| 4.651283e-92 | 0.6994923           | 0.938 | 0.772        | 8.292773e-88 | 17 |
|              | HLA-DPB1 Memory IgA |       |              |              |    |
| 8.225887e-89 | 0.9520849           | 0.839 | 0.565        | 1.466593e-84 | 17 |
|              | VIM Memory IgA      |       |              |              |    |
| 5.069942e-82 | 1.009992 0.757      | 0.46  | 9.0392e-78   | 17           |    |
|              | S100A6 Memory IgA   |       |              |              |    |
| 3.5454e-80   | 0.355022 0.999      | 0.998 | 6.321093e-76 | 17           |    |
|              | RPS14 Memory IgA    |       |              |              |    |
| 2.893925e-79 | 0.8249781           | 0.71  | 0.432        | 5.15958e-75  | 17 |
|              | COTL1 Memory IgA    |       |              |              |    |
| 1.703893e-71 | 0.700285 0.908      | 0.694 | 3.037872e-67 | 17           |    |
|              | EMP3 Memory IgA     |       |              |              |    |
| 1.985961e-67 | 0.5208488           | 0.982 | 0.945        | 3.54077e-63  | 17 |
|              | HLA-DRA Memory IgA  |       |              |              |    |
| 1.661409e-64 | 0.8396284           | 0.55  | 0.263        | 2.962127e-60 | 17 |
|              | GPR183 Memory IgA   |       |              |              |    |
| 5.395812e-61 | 0.3919015           | 1     | 0.998        | 9.620193e-57 | 17 |
|              | TMSB4X Memory IgA   |       |              |              |    |
| 7.585136e-59 | 1.080455 0.288      | 0.092 | 1.352354e-54 | 17           |    |
|              | KLK1 Memory IgA     |       |              |              |    |
| 6.778252e-57 | 0.5452284           | 0.925 | 0.791        | 1.208495e-52 | 17 |
|              | HLA-E Memory IgA    |       |              |              |    |
| 1.643423e-55 | 0.7660236           | 0.489 | 0.233        | 2.930058e-51 | 17 |
|              | CAPG Memory IgA     |       |              |              |    |
| 6.045569e-55 | 0.7376312           | 0.659 | 0.44         | 1.077864e-50 | 17 |
|              | ANXA2 Memory IgA    |       |              |              |    |
| 1.286924e-54 | 0.6924268           | 0.329 | 0.137        | 2.294457e-50 | 17 |
|              | AIM2 Memory IgA     |       |              |              |    |
| 1.814451e-53 | 1.088245 0.48       | 0.259 | 3.234985e-49 | 17           |    |
|              | S100A4 Memory IgA   |       |              |              |    |
| 1.363968e-52 | 0.5674162           | 0.928 | 0.812        | 2.431819e-48 | 17 |
|              | HLA-DPA1 Memory IgA |       |              |              |    |
| 5.857762e-52 | 0.6800992           | 0.257 | 0.073        | 1.04438e-47  | 17 |
|              | CAPN2 Memory IgA    |       |              |              |    |
| 8.162121e-52 | -0.8588277          | 0.118 | 0.351        | 1.455225e-47 | 17 |
|              | ABRACL Memory IgA   |       |              |              |    |
| 4.016141e-51 | 0.9991312           | 0.356 | 0.155        | 7.160378e-47 | 17 |
|              | LMNA Memory IgA     |       |              |              |    |
| 7.532786e-44 | 0.5460098           | 0.885 | 0.749        | 1.34302e-39  | 17 |
|              | HLA-C Memory IgA    |       |              |              |    |
| 4.773021e-43 | 0.598831 0.237      | 0.088 | 8.509819e-39 | 17           |    |
|              | ITGB7 Memory IgA    |       |              |              |    |
| 9.488433e-43 | 0.5827497           | 0.307 | 0.148        | 1.691693e-38 | 17 |
|              | CLECL1 Memory IgA   |       |              |              |    |
| 1.003209e-42 | -0.7256007          | 0.048 | 0.201        | 1.78862e-38  | 17 |
|              | YBX3 Memory IgA     |       |              |              |    |
| 1.993953e-42 | 0.572151 0.234      | 0.069 | 3.555018e-38 | 17           |    |
|              | MYO1F Memory IgA    |       |              |              |    |
| 1.75362e-41  | -0.7512616          | 0.056 | 0.236        | 3.126529e-37 | 17 |
|              | IL4R Memory IgA     |       |              |              |    |

|              |            |       |       |              |    |
|--------------|------------|-------|-------|--------------|----|
| 1.923557e-39 | 0.6210895  | 0.631 | 0.423 | 3.429509e-35 | 17 |
| PLP2         | Memory IgA |       |       |              |    |
| 3.33446e-39  | 0.6079659  | 0.519 | 0.333 | 5.945008e-35 | 17 |
| S100A11      | Memory IgA |       |       |              |    |
| 5.631629e-39 | -0.6956571 | 0.406 | 0.622 | 1.004063e-34 | 17 |
| CLEC2D       | Memory IgA |       |       |              |    |
| 6.925179e-38 | -0.8378424 | 0.746 | 0.859 | 1.23469e-33  | 17 |
| CD79B        | Memory IgA |       |       |              |    |
| 3.230489e-37 | 0.4919073  | 0.131 | 0.027 | 5.759639e-33 | 17 |
| ZBTB32       | Memory IgA |       |       |              |    |
| 1.724379e-36 | -1.239649  | 0.049 | 0.209 | 3.074395e-32 | 17 |
| RGS13        | Memory IgA |       |       |              |    |
| 1.124494e-35 | 0.4940652  | 0.183 | 0.067 | 2.00486e-31  | 17 |
| THEMIS2      | Memory IgA |       |       |              |    |
| 1.96262e-35  | -0.613017  | 0.008 | 0.125 | 3.499156e-31 | 17 |
| AL139020.1   | Memory IgA |       |       |              |    |
| 1.123381e-34 | -0.8356651 | 0.413 | 0.591 | 2.002876e-30 | 17 |
| MARCKSL1     | Memory IgA |       |       |              |    |
| 2.365405e-34 | 0.5816312  | 0.315 | 0.165 | 4.217281e-30 | 17 |
| SAMSN1       | Memory IgA |       |       |              |    |
| 4.430535e-34 | -0.705744  | 0.047 | 0.205 | 7.899201e-30 | 17 |
| HMCES        | Memory IgA |       |       |              |    |
| 5.445361e-34 | -0.5977045 | 0.452 | 0.636 | 9.708534e-30 | 17 |
| GSTP1        | Memory IgA |       |       |              |    |
| 2.410313e-33 | 0.6143273  | 0.263 | 0.138 | 4.297347e-29 | 17 |
| ITGB1        | Memory IgA |       |       |              |    |
| 2.53334e-33  | 0.4495751  | 0.927 | 0.853 | 4.516692e-29 | 17 |
| SH3BGRL3     | Memory IgA |       |       |              |    |
| 5.210774e-33 | 0.4647093  | 0.16  | 0.065 | 9.290288e-29 | 17 |
| TEX9         | Memory IgA |       |       |              |    |
| 2.294559e-31 | 0.595833   | 0.233 | 0.118 | 4.09097e-27  | 17 |
| NCBP3        | Memory IgA |       |       |              |    |
| 2.418791e-31 | 0.4049478  | 0.461 | 0.27  | 4.312462e-27 | 17 |
| KLF2         | Memory IgA |       |       |              |    |
| 2.478093e-31 | 0.5477144  | 0.546 | 0.356 | 4.418193e-27 | 17 |
| ARID5B       | Memory IgA |       |       |              |    |
| 7.716085e-31 | 0.7147769  | 0.374 | 0.194 | 1.375701e-26 | 17 |
| ACP5         | Memory IgA |       |       |              |    |
| 9.351629e-31 | 0.4617857  | 0.662 | 0.512 | 1.667302e-26 | 17 |
| LSP1         | Memory IgA |       |       |              |    |
| 3.159359e-30 | 0.3955398  | 0.878 | 0.762 | 5.632821e-26 | 17 |
| MYL12A       | Memory IgA |       |       |              |    |
| 7.441524e-30 | -0.4913642 | 0.01  | 0.121 | 1.326749e-25 | 17 |
| CD38         | Memory IgA |       |       |              |    |
| 9.96732e-30  | -0.7482556 | 0.124 | 0.306 | 1.777073e-25 | 17 |
| BCL7A        | Memory IgA |       |       |              |    |
| 1.76374e-28  | 0.4456353  | 0.229 | 0.093 | 3.144573e-24 | 17 |
| CYSLTR1      | Memory IgA |       |       |              |    |
| 1.938372e-28 | 0.4777203  | 0.618 | 0.442 | 3.455923e-24 | 17 |
| KLF6         | Memory IgA |       |       |              |    |

|              |                |       |              |              |    |
|--------------|----------------|-------|--------------|--------------|----|
| 2.223842e-28 | 0.4794886      | 0.544 | 0.386        | 3.964888e-24 | 17 |
| ARL6IP5      | Memory IgA     |       |              |              |    |
| 3.358224e-28 | 0.5247335      | 0.417 | 0.282        | 5.987378e-24 | 17 |
| CD82         | Memory IgA     |       |              |              |    |
| 4.123407e-28 | 0.471721 0.562 | 0.416 | 7.351623e-24 | 17           |    |
| CTSH         | Memory IgA     |       |              |              |    |
| 1.044582e-27 | -0.5825772     | 0.055 | 0.21         | 1.862386e-23 | 17 |
| EAF2         | Memory IgA     |       |              |              |    |
| 1.537033e-27 | -0.5274924     | 0.033 | 0.154        | 2.740377e-23 | 17 |
| CD72         | Memory IgA     |       |              |              |    |
| 4.097386e-27 | -0.5593695     | 0.128 | 0.292        | 7.305229e-23 | 17 |
| RRAS2        | Memory IgA     |       |              |              |    |
| 4.721685e-27 | -0.7686449     | 0.331 | 0.475        | 8.418291e-23 | 17 |
| CD83         | Memory IgA     |       |              |              |    |
| 4.860238e-27 | 0.4838519      | 0.215 | 0.1          | 8.665318e-23 | 17 |
| RUNX3        | Memory IgA     |       |              |              |    |
| 6.63665e-27  | 0.5421929      | 0.462 | 0.333        | 1.183248e-22 | 17 |
| VOPP1        | Memory IgA     |       |              |              |    |
| 7.425587e-27 | -0.7237128     | 0.449 | 0.619        | 1.323908e-22 | 17 |
| MEF2C        | Memory IgA     |       |              |              |    |
| 8.602403e-27 | 0.5143594      | 0.22  | 0.109        | 1.533722e-22 | 17 |
| CRIP1        | Memory IgA     |       |              |              |    |
| 1.376227e-26 | 0.3939391      | 0.765 | 0.651        | 2.453675e-22 | 17 |
| HLA-DQA1     | Memory IgA     |       |              |              |    |
| 5.618458e-26 | 0.5053987      | 0.452 | 0.301        | 1.001715e-21 | 17 |
| CD99         | Memory IgA     |       |              |              |    |
| 8.128341e-26 | -0.6000002     | 0.787 | 0.868        | 1.449202e-21 | 17 |
| CD79A        | Memory IgA     |       |              |              |    |
| 9.024502e-25 | 0.3756694      | 0.681 | 0.509        | 1.608979e-20 | 17 |
| BANK1        | Memory IgA     |       |              |              |    |
| 1.059179e-24 | 0.4310997      | 0.498 | 0.364        | 1.888409e-20 | 17 |
| CXXC5        | Memory IgA     |       |              |              |    |
| 2.025302e-24 | 0.48431 0.294  | 0.168 | 3.61091e-20  | 17           |    |
| MFSD10       | Memory IgA     |       |              |              |    |
| 3.075597e-24 | 0.4809906      | 0.613 | 0.478        | 5.483482e-20 | 17 |
| ISCU         | Memory IgA     |       |              |              |    |
| 4.452833e-24 | 0.4977927      | 0.4   | 0.296        | 7.938956e-20 | 17 |
| TCF4         | Memory IgA     |       |              |              |    |
| 8.817746e-24 | -0.7254672     | 0.192 | 0.343        | 1.572116e-19 | 17 |
| LRMP         | Memory IgA     |       |              |              |    |
| 1.816278e-23 | 0.3845887      | 0.805 | 0.695        | 3.238243e-19 | 17 |
| HLA-DQB1     | Memory IgA     |       |              |              |    |
| 6.472213e-23 | 0.453335 0.352 | 0.237 | 1.153931e-18 | 17           |    |
| NCF4         | Memory IgA     |       |              |              |    |
| 2.042367e-22 | 0.4311487      | 0.213 | 0.089        | 3.641336e-18 | 17 |
| AHNAK        | Memory IgA     |       |              |              |    |
| 2.890668e-22 | -0.4945132     | 0.239 | 0.391        | 5.153773e-18 | 17 |
| SHMT2        | Memory IgA     |       |              |              |    |
| 5.441969e-22 | 0.338342 0.63  | 0.5   | 9.702487e-18 | 17           |    |
| PSMB9        | Memory IgA     |       |              |              |    |

|              |            |       |              |              |    |
|--------------|------------|-------|--------------|--------------|----|
| 8.853289e-22 | 0.4351716  | 0.226 | 0.109        | 1.578453e-17 | 17 |
| SESN3        | Memory IgA |       |              |              |    |
| 1.51838e-21  | -0.5248779 | 0.088 | 0.22         | 2.70712e-17  | 17 |
| NANS         | Memory IgA |       |              |              |    |
| 2.995246e-21 | 0.4274608  | 0.51  | 0.374        | 5.340223e-17 | 17 |
| ZFAND6       | Memory IgA |       |              |              |    |
| 4.089781e-21 | 0.4380795  | 0.24  | 0.115        | 7.29167e-17  | 17 |
| FCGR2B       | Memory IgA |       |              |              |    |
| 5.490575e-21 | 0.3799688  | 0.814 | 0.711        | 9.789147e-17 | 17 |
| CLIC1        | Memory IgA |       |              |              |    |
| 5.640079e-21 | -0.5156591 | 0.029 | 0.136        | 1.00557e-16  | 17 |
| NEIL1        | Memory IgA |       |              |              |    |
| 7.499114e-21 | -0.435085  | 0.049 | 0.161        | 1.337017e-16 | 17 |
| APLP2        | Memory IgA |       |              |              |    |
| 1.001625e-20 | -0.5052552 | 0.088 | 0.197        | 1.785798e-16 | 17 |
| CLEC2B       | Memory IgA |       |              |              |    |
| 1.142345e-20 | -1.32817   | 0.178 | 2.036686e-16 | 17           |    |
| MZB1         | Memory IgA |       |              |              |    |
| 1.798629e-20 | -0.4128476 | 0.051 | 0.167        | 3.206776e-16 | 17 |
| DEF8         | Memory IgA |       |              |              |    |
| 2.018999e-20 | -0.3944299 | 0.665 | 0.773        | 3.599674e-16 | 17 |
| SEC62        | Memory IgA |       |              |              |    |
| 3.057768e-20 | -0.5174346 | 0.129 | 0.266        | 5.451695e-16 | 17 |
| CD22         | Memory IgA |       |              |              |    |
| 3.790324e-20 | 0.4166098  | 0.161 | 0.081        | 6.757768e-16 | 17 |
| KCNN4        | Memory IgA |       |              |              |    |
| 6.920466e-20 | -0.348563  | 0.013 | 0.103        | 1.23385e-15  | 17 |
| MYBL2        | Memory IgA |       |              |              |    |
| 7.431456e-20 | 0.4039596  | 0.207 | 0.117        | 1.324954e-15 | 17 |
| PYCARD       | Memory IgA |       |              |              |    |
| 7.672264e-20 | -0.3077386 | 0.013 | 0.104        | 1.367888e-15 | 17 |
| SEMA4A       | Memory IgA |       |              |              |    |
| 1.445863e-19 | -0.4816965 | 0.055 | 0.138        | 2.57783e-15  | 17 |
| FCER2        | Memory IgA |       |              |              |    |
| 3.528059e-19 | -0.5053528 | 0.081 | 0.185        | 6.290177e-15 | 17 |
| PLPP5        | Memory IgA |       |              |              |    |
| 6.253868e-19 | 0.3349425  | 0.838 | 0.751        | 1.115002e-14 | 17 |
| TOMM7        | Memory IgA |       |              |              |    |
| 1.650099e-18 | 0.3490772  | 0.143 | 0.061        | 2.941962e-14 | 17 |
| KYNU         | Memory IgA |       |              |              |    |
| 1.8691e-18   | 0.403058   | 0.124 | 3.332419e-14 | 17           |    |
| ZBTB20       | Memory IgA |       |              |              |    |
| 2.011231e-18 | -0.4777298 | 0.121 | 0.244        | 3.585824e-14 | 17 |
| PHACTR1      | Memory IgA |       |              |              |    |
| 2.488211e-18 | 0.3346911  | 0.638 | 0.5          | 4.436231e-14 | 17 |
| TSC22D3      | Memory IgA |       |              |              |    |
| 3.386748e-18 | -0.4787832 | 0.539 | 0.666        | 6.038233e-14 | 17 |
| DBI          | Memory IgA |       |              |              |    |
| 3.799012e-18 | -0.4854608 | 0.131 | 0.222        | 6.773259e-14 | 17 |
| GBP2         | Memory IgA |       |              |              |    |



|              |            |       |       |              |    |
|--------------|------------|-------|-------|--------------|----|
| 4.105072e-18 | 0.4863244  | 0.496 | 0.35  | 7.318932e-14 | 17 |
| TXNIP        | Memory IgA |       |       |              |    |
| 5.803694e-18 | 0.3986013  | 0.4   | 0.282 | 1.034741e-13 | 17 |
| ACAP1        | Memory IgA |       |       |              |    |
| 7.042418e-18 | -0.9787351 | 0.312 | 0.43  | 1.255593e-13 | 17 |
| STMN1        | Memory IgA |       |       |              |    |
| 1.697544e-17 | 0.4535461  | 0.317 | 0.194 | 3.02655e-13  | 17 |
| TYMP         | Memory IgA |       |       |              |    |
| 5.643474e-17 | -0.4922005 | 0.114 | 0.239 | 1.006175e-12 | 17 |
| GCHFR        | Memory IgA |       |       |              |    |
| 5.941021e-17 | -0.5155935 | 0.185 | 0.301 | 1.059225e-12 | 17 |
| NME1         | Memory IgA |       |       |              |    |
| 8.212387e-17 | 0.3097148  | 0.46  | 0.346 | 1.464186e-12 | 17 |
| S100A10      | Memory IgA |       |       |              |    |
| 8.53378e-17  | -0.4684364 | 0.289 | 0.442 | 1.521488e-12 | 17 |
| RH0H         | Memory IgA |       |       |              |    |
| 1.276476e-16 | 0.3425314  | 0.594 | 0.469 | 2.275829e-12 | 17 |
| GPSM3        | Memory IgA |       |       |              |    |
| 1.503411e-16 | -0.4088533 | 0.106 | 0.226 | 2.680432e-12 | 17 |
| SIAH2        | Memory IgA |       |       |              |    |
| 1.542672e-16 | -0.495574  | 0.119 | 0.232 | 2.750429e-12 | 17 |
| CKS2         | Memory IgA |       |       |              |    |
| 1.814996e-16 | 0.3319849  | 0.435 | 0.33  | 3.235956e-12 | 17 |
| RIPOR2       | Memory IgA |       |       |              |    |
| 3.009316e-16 | 0.3191286  | 0.139 | 0.059 | 5.365309e-12 | 17 |
| FLNA         | Memory IgA |       |       |              |    |
| 4.481601e-16 | 0.3904419  | 0.319 | 0.217 | 7.990246e-12 | 17 |
| CCDC50       | Memory IgA |       |       |              |    |
| 6.526692e-16 | -0.701833  | 0.636 | 0.697 | 1.163644e-11 | 17 |
| H2AFZ        | Memory IgA |       |       |              |    |
| 8.309438e-16 | 0.3267826  | 0.761 | 0.675 | 1.48149e-11  | 17 |
| TAGLN2       | Memory IgA |       |       |              |    |
| 9.054587e-16 | -0.8651724 | 0.665 | 0.717 | 1.614342e-11 | 17 |
| HMGN2        | Memory IgA |       |       |              |    |
| 2.535489e-15 | 0.4244119  | 0.221 | 0.139 | 4.520524e-11 | 17 |
| MYO1G        | Memory IgA |       |       |              |    |
| 2.760739e-15 | 0.3235166  | 0.395 | 0.277 | 4.922122e-11 | 17 |
| RNASET2      | Memory IgA |       |       |              |    |
| 3.682798e-15 | 0.3322626  | 0.184 | 0.111 | 6.566061e-11 | 17 |
| TRAC         | Memory IgA |       |       |              |    |
| 1.026307e-14 | -0.4188883 | 0.51  | 0.61  | 1.829802e-10 | 17 |
| POMP         | Memory IgA |       |       |              |    |
| 1.081854e-14 | -0.3897062 | 0.313 | 0.442 | 1.928837e-10 | 17 |
| FDPS         | Memory IgA |       |       |              |    |
| 1.819422e-14 | -0.322358  | 0.03  | 0.113 | 3.243848e-10 | 17 |
| AC023590.1   | Memory IgA |       |       |              |    |
| 3.279524e-14 | -0.4661295 | 0.43  | 0.537 | 5.847064e-10 | 17 |
| SRSF9        | Memory IgA |       |       |              |    |
| 3.389776e-14 | -0.4394374 | 0.568 | 0.659 | 6.043632e-10 | 17 |
| SLC25A5      | Memory IgA |       |       |              |    |

|              |                |       |              |              |    |
|--------------|----------------|-------|--------------|--------------|----|
| 5.090995e-14 | 0.5173682      | 0.207 | 0.124        | 9.076736e-10 | 17 |
| LGALS3       | Memory IgA     |       |              |              |    |
| 5.750017e-14 | 0.329229 0.232 | 0.146 | 1.025171e-09 | 17           |    |
| SELENOW      | Memory IgA     |       |              |              |    |
| 5.818091e-14 | -0.3391348     | 0.059 | 0.147        | 1.037307e-09 | 17 |
| MID1IP1      | Memory IgA     |       |              |              |    |
| 8.558938e-14 | -0.3131682     | 0.048 | 0.148        | 1.525973e-09 | 17 |
| SEC14L1      | Memory IgA     |       |              |              |    |
| 1.043694e-13 | -0.7879998     | 0.1   | 0.183        | 1.860802e-09 | 17 |
| XBP1         | Memory IgA     |       |              |              |    |
| 1.119022e-13 | -0.4986689     | 0.05  | 0.15         | 1.995104e-09 | 17 |
| BIK          | Memory IgA     |       |              |              |    |
| 1.728423e-13 | -0.3933341     | 0.289 | 0.403        | 3.081605e-09 | 17 |
| RPA3         | Memory IgA     |       |              |              |    |
| 1.735286e-13 | -0.3950461     | 0.153 | 0.269        | 3.093841e-09 | 17 |
| ALOX5AP      | Memory IgA     |       |              |              |    |
| 1.797115e-13 | 0.3130659      | 0.421 | 0.303        | 3.204077e-09 | 17 |
| ARHGAP24     | Memory IgA     |       |              |              |    |
| 2.190022e-13 | -0.474442      | 0.399 | 0.486        | 3.90459e-09  | 17 |
| RANBP1       | Memory IgA     |       |              |              |    |
| 2.419791e-13 | -0.3920785     | 0.078 | 0.188        | 4.314245e-09 | 17 |
| P2RX5        | Memory IgA     |       |              |              |    |
| 2.458384e-13 | -0.3678036     | 0.529 | 0.628        | 4.383053e-09 | 17 |
| SELENOH      | Memory IgA     |       |              |              |    |
| 2.761654e-13 | -0.3826666     | 0.907 | 0.936        | 4.923754e-09 | 17 |
| BTG1         | Memory IgA     |       |              |              |    |
| 3.89453e-13  | -0.3981845     | 0.234 | 0.351        | 6.943557e-09 | 17 |
| TIMM13       | Memory IgA     |       |              |              |    |
| 4.106151e-13 | 0.4763344      | 0.656 | 0.501        | 7.320857e-09 | 17 |
| HLA-DRB5     | Memory IgA     |       |              |              |    |
| 4.948528e-13 | -0.3563993     | 0.07  | 0.137        | 8.822731e-09 | 17 |
| PSAT1        | Memory IgA     |       |              |              |    |
| 5.049358e-13 | -0.363115      | 0.28  | 0.401        | 9.002501e-09 | 17 |
| BLOC1S2      | Memory IgA     |       |              |              |    |
| 5.272864e-13 | -0.5130473     | 0.129 | 0.237        | 9.400989e-09 | 17 |
| UBE2J1       | Memory IgA     |       |              |              |    |
| 5.856426e-13 | 0.3210714      | 0.249 | 0.161        | 1.044142e-08 | 17 |
| KIAA1551     | Memory IgA     |       |              |              |    |
| 6.900593e-13 | -0.3683849     | 0.41  | 0.516        | 1.230307e-08 | 17 |
| SSBP1        | Memory IgA     |       |              |              |    |
| 8.104443e-13 | -0.3832554     | 0.407 | 0.526        | 1.444941e-08 | 17 |
| FKBP1A       | Memory IgA     |       |              |              |    |
| 1.419131e-12 | -0.4011659     | 0.485 | 0.573        | 2.530169e-08 | 17 |
| SNRPE        | Memory IgA     |       |              |              |    |
| 1.838202e-12 | 0.3276311      | 0.337 | 0.24         | 3.27733e-08  | 17 |
| HLA-F        | Memory IgA     |       |              |              |    |
| 2.010184e-12 | -0.3515308     | 0.201 | 0.325        | 3.583958e-08 | 17 |
| RNASEH2C     | Memory IgA     |       |              |              |    |
| 2.090349e-12 | -0.4257476     | 0.375 | 0.476        | 3.726883e-08 | 17 |
| SNRPD1       | Memory IgA     |       |              |              |    |

|              |            |       |       |              |              |
|--------------|------------|-------|-------|--------------|--------------|
| 2.126643e-12 | 0.316008   | 0.331 | 0.24  | 3.791591e-08 | 17           |
| ARHGAP45     | Memory IgA |       |       |              |              |
| 3.16023e-12  | 0.3231832  |       | 0.239 | 0.146        | 5.634373e-08 |
| MVP          | Memory IgA |       |       |              | 17           |
| 3.543673e-12 | 0.3362607  |       | 0.509 | 0.38         | 6.318014e-08 |
| CD44         | Memory IgA |       |       |              | 17           |
| 4.017694e-12 | -0.3515825 |       | 0.477 | 0.567        | 7.163146e-08 |
| SNRPB        | Memory IgA |       |       |              | 17           |
| 4.535361e-12 | 0.3648104  |       | 0.207 | 0.128        | 8.086095e-08 |
| EEA1         | Memory IgA |       |       |              | 17           |
| 4.857709e-12 | -0.3686854 |       | 0.552 | 0.642        | 8.660809e-08 |
| ERH          | Memory IgA |       |       |              | 17           |
| 7.089864e-12 | -0.3897956 |       | 0.544 | 0.636        | 1.264052e-07 |
| PSMA4        | Memory IgA |       |       |              | 17           |
| 7.983175e-12 | -0.3483336 |       | 0.154 | 0.253        | 1.42332e-07  |
| DNPH1        | Memory IgA |       |       |              | 17           |
| 8.193095e-12 | -0.3314155 |       | 0.215 | 0.322        | 1.460747e-07 |
| LSM4         | Memory IgA |       |       |              | 17           |
| 8.717664e-12 | 0.3011541  |       | 0.386 | 0.276        | 1.554272e-07 |
| IFITM2       | Memory IgA |       |       |              | 17           |
| 1.28472e-11  | -0.531635  |       | 0.541 | 0.6          | 2.290528e-07 |
| PRDX1        | Memory IgA |       |       |              | 17           |
| 1.742965e-11 | 0.3521847  |       | 0.423 | 0.341        | 3.107533e-07 |
| CMTM6        | Memory IgA |       |       |              | 17           |
| 2.177847e-11 | 0.3003744  |       | 0.172 | 0.088        | 3.882884e-07 |
| ADGRE5       | Memory IgA |       |       |              | 17           |
| 3.341425e-11 | -0.5338971 |       | 0.075 | 0.132        | 5.957427e-07 |
| MYC          | Memory IgA |       |       |              | 17           |
| 3.562235e-11 | -0.3773587 |       | 0.251 | 0.346        | 6.35111e-07  |
| INSIG1       | Memory IgA |       |       |              | 17           |
| 3.768441e-11 | -0.3336208 |       | 0.179 | 0.286        | 6.718753e-07 |
| PRDX3        | Memory IgA |       |       |              | 17           |
| 3.79571e-11  | -0.4094664 |       | 0.035 | 0.111        | 6.767372e-07 |
| VPREB3       | Memory IgA |       |       |              | 17           |
| 5.336125e-11 | -0.3699498 |       | 0.292 | 0.396        | 9.513777e-07 |
| YWHAE        | Memory IgA |       |       |              | 17           |
| 5.76221e-11  | -0.3130297 |       | 0.155 | 0.272        | 1.027344e-06 |
| TOP1         | Memory IgA |       |       |              | 17           |
| 6.155771e-11 | 0.3269583  |       | 0.294 | 0.21         | 1.097512e-06 |
| IDS          | Memory IgA |       |       |              | 17           |
| 6.195033e-11 | -0.355557  |       | 0.24  | 0.328        | 1.104512e-06 |
| SLC3A2       | Memory IgA |       |       |              | 17           |
| 6.607427e-11 | -0.3211767 |       | 0.146 | 0.235        | 1.178038e-06 |
| MTHFD2       | Memory IgA |       |       |              | 17           |
| 8.352267e-11 | -0.3767602 |       | 0.162 | 0.277        | 1.489126e-06 |
| ITGAE        | Memory IgA |       |       |              | 17           |
| 9.212623e-11 | -0.3423917 |       | 0.151 | 0.252        | 1.642519e-06 |
| TIFA         | Memory IgA |       |       |              | 17           |
| 1.07271e-10  | -0.3474589 |       | 0.282 | 0.376        | 1.912535e-06 |
| LCP1         | Memory IgA |       |       |              | 17           |

|              |            |       |       |              |    |
|--------------|------------|-------|-------|--------------|----|
| 1.190913e-10 | -0.397295  | 0.165 | 0.267 | 2.123278e-06 | 17 |
| FAM3C        | Memory IgA |       |       |              |    |
| 1.208664e-10 | -0.3371913 | 0.146 | 0.243 | 2.154927e-06 | 17 |
| NSRP1        | Memory IgA |       |       |              |    |
| 1.267428e-10 | -0.4294666 | 0.167 | 0.276 | 2.259697e-06 | 17 |
| NCF1         | Memory IgA |       |       |              |    |
| 1.602766e-10 | -0.4298778 | 0.49  | 0.56  | 2.857571e-06 | 17 |
| NCL          | Memory IgA |       |       |              |    |
| 1.734452e-10 | -0.3418116 | 0.227 | 0.34  | 3.092355e-06 | 17 |
| NDUFC1       | Memory IgA |       |       |              |    |
| 1.878292e-10 | -0.337581  | 0.054 | 0.122 | 3.348807e-06 | 17 |
| LPP          | Memory IgA |       |       |              |    |
| 2.294347e-10 | -0.3883251 | 0.254 | 0.363 | 4.090591e-06 | 17 |
| TPD52        | Memory IgA |       |       |              |    |
| 2.738877e-10 | -0.3776065 | 0.407 | 0.503 | 4.883144e-06 | 17 |
| FOXP1        | Memory IgA |       |       |              |    |
| 2.918783e-10 | -0.5052247 | 0.232 | 0.317 | 5.203899e-06 | 17 |
| CD69         | Memory IgA |       |       |              |    |
| 3.282896e-10 | -0.3946048 | 0.332 | 0.431 | 5.853076e-06 | 17 |
| IRF8         | Memory IgA |       |       |              |    |
| 3.669888e-10 | -0.4705061 | 0.227 | 0.333 | 6.543043e-06 | 17 |
| GRHPR        | Memory IgA |       |       |              |    |
| 3.925236e-10 | -0.3138884 | 0.403 | 0.508 | 6.998304e-06 | 17 |
| FDFT1        | Memory IgA |       |       |              |    |
| 3.940671e-10 | -0.3774952 | 0.072 | 0.17  | 7.025821e-06 | 17 |
| CCDC88A      | Memory IgA |       |       |              |    |
| 4.435789e-10 | -0.347253  | 0.221 | 0.326 | 7.908568e-06 | 17 |
| BLNK         | Memory IgA |       |       |              |    |
| 4.739339e-10 | -0.3016978 | 0.129 | 0.229 | 8.449767e-06 | 17 |
| NSMCE1       | Memory IgA |       |       |              |    |
| 5.266346e-10 | -0.6902887 | 0.621 | 0.667 | 9.389369e-06 | 17 |
| TUBA1B       | Memory IgA |       |       |              |    |
| 5.528833e-10 | -0.4581242 | 0.92  | 0.933 | 9.857357e-06 | 17 |
| SERF2        | Memory IgA |       |       |              |    |
| 5.618822e-10 | -0.3654058 | 0.109 | 0.196 | 1.00178e-05  | 17 |
| FAM129C      | Memory IgA |       |       |              |    |
| 5.638904e-10 | -0.3180877 | 0.399 | 0.499 | 1.00536e-05  | 17 |
| COX5A        | Memory IgA |       |       |              |    |
| 7.266124e-10 | -0.3313757 | 0.192 | 0.294 | 1.295477e-05 | 17 |
| HSPA4        | Memory IgA |       |       |              |    |
| 7.632929e-10 | -0.3390441 | 0.1   | 0.188 | 1.360875e-05 | 17 |
| CDCA7L       | Memory IgA |       |       |              |    |
| 8.249771e-10 | 0.3344154  | 0.438 | 0.343 | 1.470852e-05 | 17 |
| CAST         | Memory IgA |       |       |              |    |
| 8.493744e-10 | -0.3881009 | 0.71  | 0.749 | 1.51435e-05  | 17 |
| RAN          | Memory IgA |       |       |              |    |
| 9.45094e-10  | -0.3073739 | 0.158 | 0.254 | 1.685008e-05 | 17 |
| SLC50A1      | Memory IgA |       |       |              |    |
| 9.939831e-10 | -0.3290709 | 0.295 | 0.409 | 1.772173e-05 | 17 |
| LSM10        | Memory IgA |       |       |              |    |

|              |            |       |       |              |    |
|--------------|------------|-------|-------|--------------|----|
| 1.123024e-09 | 0.3067011  | 0.185 | 0.114 | 2.002239e-05 | 17 |
| ENTPD1       | Memory IgA |       |       |              |    |
| 1.161389e-09 | -0.3379373 | 0.153 | 0.219 | 2.07064e-05  | 17 |
| EIF4EBP1     | Memory IgA |       |       |              |    |
| 1.316016e-09 | -0.381027  | 0.441 | 0.514 | 2.346324e-05 | 17 |
| PA2G4        | Memory IgA |       |       |              |    |
| 1.662367e-09 | -0.332832  | 0.438 | 0.534 | 2.963834e-05 | 17 |
| SNRPB2       | Memory IgA |       |       |              |    |
| 1.697508e-09 | -0.3463374 | 0.53  | 0.598 | 3.026487e-05 | 17 |
| LDHA         | Memory IgA |       |       |              |    |
| 1.717978e-09 | -0.3269724 | 0.381 | 0.477 | 3.062984e-05 | 17 |
| TNFAIP8      | Memory IgA |       |       |              |    |
| 1.872909e-09 | -0.3175245 | 0.051 | 0.106 | 3.33921e-05  | 17 |
| C1orf162     | Memory IgA |       |       |              |    |
| 1.96219e-09  | -0.3096653 | 0.57  | 0.642 | 3.498388e-05 | 17 |
| HNRNPM       | Memory IgA |       |       |              |    |
| 2.412303e-09 | -0.4704518 | 0.728 | 0.769 | 4.300895e-05 | 17 |
| HMG1         | Memory IgA |       |       |              |    |
| 3.020666e-09 | 0.3295629  | 0.381 | 0.312 | 5.385545e-05 | 17 |
| LPXN         | Memory IgA |       |       |              |    |
| 3.318264e-09 | 0.3044169  | 0.419 | 0.35  | 5.916133e-05 | 17 |
| MRPS6        | Memory IgA |       |       |              |    |
| 3.319866e-09 | -0.5709453 | 0.111 | 0.192 | 5.918989e-05 | 17 |
| PTTG1        | Memory IgA |       |       |              |    |
| 3.437189e-09 | -0.3105284 | 0.227 | 0.325 | 6.128165e-05 | 17 |
| IMP4         | Memory IgA |       |       |              |    |
| 3.508281e-09 | -0.3232631 | 0.105 | 0.192 | 6.254914e-05 | 17 |
| LBR          | Memory IgA |       |       |              |    |
| 3.644976e-09 | -1.283867  | 0.244 | 0.303 | 6.498628e-05 | 17 |
| HMGB2        | Memory IgA |       |       |              |    |
| 5.645186e-09 | -0.3007137 | 0.05  | 0.12  | 0.000100648  | 17 |
| UBE2S        | Memory IgA |       |       |              |    |
| 6.271232e-09 | -0.3262366 | 0.481 | 0.561 | 0.0001118098 | 17 |
| ATP5PF       | Memory IgA |       |       |              |    |
| 6.299321e-09 | -0.3574353 | 0.519 | 0.585 | 0.0001123106 | 17 |
| ANP32B       | Memory IgA |       |       |              |    |
| 7.077573e-09 | -0.3471125 | 0.076 | 0.162 | 0.000126186  | 17 |
| SUSD3        | Memory IgA |       |       |              |    |
| 9.383538e-09 | -0.6454705 | 0.25  | 0.287 | 0.0001672991 | 17 |
| MIR155HG     | Memory IgA |       |       |              |    |
| 9.772685e-09 | -0.3656435 | 0.1   | 0.177 | 0.0001742372 | 17 |
| PDIA4        | Memory IgA |       |       |              |    |
| 1.367782e-08 | -0.3095587 | 0.573 | 0.647 | 0.0002438619 | 17 |
| SNRPG        | Memory IgA |       |       |              |    |
| 1.748009e-08 | -0.4257912 | 0.078 | 0.153 | 0.0003116525 | 17 |
| DUSP2        | Memory IgA |       |       |              |    |
| 2.122739e-08 | -0.3890734 | 0.335 | 0.419 | 0.0003784632 | 17 |
| METAP2       | Memory IgA |       |       |              |    |
| 2.391279e-08 | -0.312112  | 0.317 | 0.424 | 0.0004263411 | 17 |
| TMEM123      | Memory IgA |       |       |              |    |

|              |            |       |       |              |              |
|--------------|------------|-------|-------|--------------|--------------|
| 2.517025e-08 | -0.36674   | 0.803 | 0.848 | 0.0004487604 | 17           |
| CD37         | Memory IgA |       |       |              |              |
| 2.698156e-08 | -0.3095616 |       | 0.231 | 0.325        | 0.0004810543 |
| HSBP1        | Memory IgA |       |       |              | 17           |
| 3.019217e-08 | -0.3208066 |       | 0.149 | 0.236        | 0.0005382962 |
| ZCCHC7       | Memory IgA |       |       |              | 17           |
| 3.17117e-08  | -0.302362  |       | 0.449 | 0.531        | 0.0005653879 |
| PSME2        | Memory IgA |       |       |              | 17           |
| 3.640575e-08 | -1.275279  |       | 0.906 | 0.927        | 0.0006490781 |
| IGKC         | Memory IgA |       |       |              | 17           |
| 4.816135e-08 | -0.3363669 |       | 0.313 | 0.403        | 0.0008586687 |
| RPL22L1      | Memory IgA |       |       |              | 17           |
| 5.201126e-08 | -0.3058582 |       | 0.223 | 0.324        | 0.0009273088 |
| NAA38        | Memory IgA |       |       |              | 17           |
| 5.282633e-08 | 0.3230418  |       | 0.557 | 0.461        | 0.0009418406 |
| CD63         | Memory IgA |       |       |              | 17           |
| 5.888941e-08 | -0.4306778 |       | 0.13  | 0.21         | 0.001049939  |
| FOS          | Memory IgA |       |       |              | 17           |
| 6.228488e-08 | -0.300054  |       | 0.35  | 0.43         | 0.001110477  |
| CCT2         | Memory IgA |       |       |              | 17           |
| 7.864629e-08 | -0.3584612 |       | 0.397 | 0.462        | 0.001402185  |
| HSPD1        | Memory IgA |       |       |              | 17           |
| 1.490323e-07 | -0.3630836 |       | 0.263 | 0.339        | 0.002657097  |
| HVCN1        | Memory IgA |       |       |              | 17           |
| 1.934405e-07 | -0.315887  |       | 0.481 | 0.556        | 0.003448851  |
| SEC61G       | Memory IgA |       |       |              | 17           |
| 2.288828e-07 | 0.3092002  |       | 0.184 | 0.131        | 0.004080752  |
| CYT0R        | Memory IgA |       |       |              | 17           |
| 2.359109e-07 | -0.5456405 |       | 0.284 | 0.393        | 0.004206055  |
| EIF5A        | Memory IgA |       |       |              | 17           |
| 2.670541e-07 | -0.313834  |       | 0.25  | 0.319        | 0.004761307  |
| DDX21        | Memory IgA |       |       |              | 17           |
| 3.228906e-07 | -0.3301151 |       | 0.585 | 0.638        | 0.005756816  |
| SET          | Memory IgA |       |       |              | 17           |
| 4.343115e-07 | -0.3889625 |       | 0.925 | 0.932        | 0.00774334   |
| HMGB1        | Memory IgA |       |       |              | 17           |
| 1.176575e-06 | -0.3383912 |       | 0.413 | 0.494        | 0.02097716   |
| C4orf3       | Memory IgA |       |       |              | 17           |
| 1.454205e-06 | -2.899026  |       | 0.398 | 0.451        | 0.02592702   |
| IGHG3        | Memory IgA |       |       |              | 17           |
| 1.634264e-06 | -0.3797316 |       | 0.829 | 0.852        | 0.02913729   |
| ATP5MG       | Memory IgA |       |       |              | 17           |
| 3.58253e-06  | -0.3355927 |       | 0.174 | 0.271        | 0.06387293   |
| PIM1         | Memory IgA |       |       |              | 17           |
| 6.740446e-06 | -0.3911456 |       | 0.215 | 0.278        | 0.1201754    |
| HSPA5        | Memory IgA |       |       |              | 17           |
| 1.279356e-05 | -1.993756  |       | 0.535 | 0.647        | 0.2280963    |
| IGLC2        | Memory IgA |       |       |              | 17           |
| 2.386268e-05 | -0.3494899 |       | 0.845 | 0.848        | 0.4254477    |
| HSP90AB1     | Memory IgA |       |       |              | 17           |

|                     |            |       |       |   |    |         |      |
|---------------------|------------|-------|-------|---|----|---------|------|
| 0.0001697784        | -1.209283  | 0.378 | 0.423 | 1 | 17 |         |      |
| HIST1H4C Memory IgA |            |       |       |   |    |         |      |
| 0.000809517         | -0.3057969 | 0.723 | 0.751 | 1 | 17 |         |      |
| CXCR4 Memory IgA    |            |       |       |   |    |         |      |
| 0.001632427         | -0.36321   | 0.566 | 0.577 | 1 | 17 | TUBB    |      |
| Memory IgA          |            |       |       |   |    |         |      |
| 0.00291218          | -0.3877127 | 0.507 | 0.534 | 1 | 17 |         |      |
| ISG20 Memory IgA    |            |       |       |   |    |         |      |
| 0.003426467         | -0.3021369 | 0.321 | 0.36  | 1 | 17 |         |      |
| H2AFV Memory IgA    |            |       |       |   |    |         |      |
| 0                   | 3.860268   | 0.999 | 0.29  | 0 | 18 | HMGB2   | DZ 2 |
| 0                   | 3.383629   | 0.883 | 0.041 | 0 | 18 | UBE2C   | DZ 2 |
| 0                   | 3.264488   | 0.966 | 0.032 | 0 | 18 | CDC20   | DZ 2 |
| 0                   | 3.251831   | 0.97  | 0.078 | 0 | 18 | CCNB1   | DZ 2 |
| 0                   | 3.23978    | 0.988 | 0.176 | 0 | 18 | PTTG1   | DZ 2 |
| 0                   | 3.238605   | 0.905 | 0.053 | 0 | 18 | TOP2A   | DZ 2 |
| 0                   | 3.215331   | 0.952 | 0.038 | 0 | 18 | CENPF   | DZ 2 |
| 0                   | 3.204885   | 0.966 | 0.039 | 0 | 18 | CCNB2   | DZ 2 |
| 0                   | 2.834465   | 0.933 | 0.231 | 0 | 18 | KPNA2   | DZ 2 |
| 0                   | 2.74143    | 0.904 | 0.019 | 0 | 18 | PLK1    | DZ 2 |
| 0                   | 2.735905   | 0.974 | 0.217 | 0 | 18 | CKS2    | DZ 2 |
| 0                   | 2.705582   | 0.955 | 0.049 | 0 | 18 | BIRC5   | DZ 2 |
| 0                   | 2.697802   | 0.912 | 0.046 | 0 | 18 | MKI67   | DZ 2 |
| 0                   | 2.680904   | 0.911 | 0.067 | 0 | 18 | NUSAP1  | DZ 2 |
| 0                   | 2.657001   | 0.925 | 0.104 | 0 | 18 | UBE2S   | DZ 2 |
| 0                   | 2.600889   | 0.99  | 0.66  | 0 | 18 | TUBA1B  | DZ 2 |
| 0                   | 2.581186   | 0.918 | 0.05  | 0 | 18 | CDKN3   | DZ 2 |
| 0                   | 2.560081   | 0.99  | 0.418 | 0 | 18 | STMN1   | DZ 2 |
| 0                   | 2.559021   | 0.903 | 0.032 | 0 | 18 | HMMR    | DZ 2 |
| 0                   | 2.555259   | 0.962 | 0.342 | 0 | 18 | TUBB4B  | DZ 2 |
| 0                   | 2.505779   | 0.663 | 0.043 | 0 | 18 | CDK1    | DZ 2 |
| 0                   | 2.471285   | 0.999 | 0.711 | 0 | 18 | HMG2    | DZ 2 |
| 0                   | 2.339582   | 0.877 | 0.027 | 0 | 18 | AURKA   | DZ 2 |
| 0                   | 2.317225   | 0.856 | 0.036 | 0 | 18 | AURKB   | DZ 2 |
| 0                   | 2.298707   | 0.972 | 0.444 | 0 | 18 | ARL6IP1 | DZ 2 |
| 0                   | 2.217005   | 0.93  | 0.156 | 0 | 18 | SMC4    | DZ 2 |
| 0                   | 2.211468   | 0.851 | 0.027 | 0 | 18 | NUF2    | DZ 2 |
| 0                   | 2.188388   | 0.848 | 0.019 | 0 | 18 | CENPA   | DZ 2 |
| 0                   | 2.187973   | 0.838 | 0.02  | 0 | 18 | CENPE   | DZ 2 |
| 0                   | 2.161751   | 0.938 | 0.234 | 0 | 18 | CKS1B   | DZ 2 |
| 0                   | 2.141114   | 0.806 | 0.02  | 0 | 18 | ASPM    | DZ 2 |
| 0                   | 2.13207    | 0.851 | 0.031 | 0 | 18 | TPX2    | DZ 2 |
| 0                   | 2.125271   | 0.876 | 0.071 | 0 | 18 | TACC3   | DZ 2 |
| 0                   | 2.10653    | 0.942 | 0.269 | 0 | 18 | JPT1    | DZ 2 |
| 0                   | 2.06793    | 0.994 | 0.691 | 0 | 18 | H2AFZ   | DZ 2 |
| 0                   | 2.061773   | 0.947 | 0.194 | 0 | 18 | RGS13   | DZ 2 |
| 0                   | 2.039766   | 0.975 | 0.57  | 0 | 18 | TUBB    | DZ 2 |
| 0                   | 2.034578   | 1     | 0.931 | 0 | 18 | HMGB1   | DZ 2 |
| 0                   | 1.942677   | 0.768 | 0.072 | 0 | 18 | AICDA   | DZ 2 |
| 0                   | 1.923863   | 0.782 | 0.028 | 0 | 18 | CCNA2   | DZ 2 |

|               |           |       |       |               |               |           |        |    |
|---------------|-----------|-------|-------|---------------|---------------|-----------|--------|----|
| 0             | 1.886015  | 0.991 | 0.802 | 0             | 18            | CALM2     | DZ 2   |    |
| 0             | 1.884098  | 0.964 | 0.349 | 0             | 18            | H2AFV     | DZ 2   |    |
| 0             | 1.868763  | 0.785 | 0.025 | 0             | 18            | GTSE1     | DZ 2   |    |
| 0             | 1.849803  | 0.842 | 0.065 | 0             | 18            | MAD2L1    | DZ 2   |    |
| 0             | 1.820661  | 0.785 | 0.048 | 0             | 18            | HMGB3     | DZ 2   |    |
| 0             | 1.791262  | 0.759 | 0.027 | 0             | 18            | CDCA8     | DZ 2   |    |
| 0             | 1.736836  | 0.741 | 0.015 | 0             | 18            | DLGAP5    | DZ 2   |    |
| 0             | 1.719314  | 0.707 | 0.025 | 0             | 18            | CDCA3     | DZ 2   |    |
| 0             | 1.714532  | 0.813 | 0.1   | 0             | 18            | CKAP2     | DZ 2   |    |
| 0             | 1.702175  | 0.969 | 0.387 | 0             | 18            | NUCKS1    | DZ 2   |    |
| 0             | 1.664051  | 0.593 | 0.019 | 0             | 18            | PIF1      | DZ 2   |    |
| 0             | 1.648273  | 0.72  | 0.027 | 0             | 18            | KIFC1     | DZ 2   |    |
| 0             | 1.605182  | 0.917 | 0.381 | 0             | 18            | BUB3      | DZ 2   |    |
| 0             | 1.544157  | 0.712 | 0.047 | 0             | 18            | SG02      | DZ 2   |    |
| 0             | 1.480265  | 0.685 | 0.025 | 0             | 18            | PBK       | DZ 2   |    |
| 0             | 1.466599  | 0.755 | 0.083 | 0             | 18            | KIF22     | DZ 2   |    |
| 0             | 1.445123  | 0.662 | 0.021 | 0             | 18            | TROAP     | DZ 2   |    |
| 0             | 1.400042  | 0.71  | 0.05  | 0             | 18            | ZWINT     | DZ 2   |    |
| 0             | 1.364946  | 0.623 | 0.024 | 0             | 18            | CDCA2     | DZ 2   |    |
| 0             | 1.361597  | 0.703 | 0.058 | 0             | 18            | CENPW     | DZ 2   |    |
| 0             | 1.359892  | 0.617 | 0.009 | 0             | 18            | DEPDC1    | DZ 2   |    |
| 0             | 1.34816   | 0.628 | 0.017 | 0             | 18            | KIF2C     | DZ 2   |    |
| 0             | 1.341093  | 0.657 | 0.032 | 0             | 18            | KNSTRN    | DZ 2   |    |
| 0             | 1.333285  | 0.611 | 0.022 | 0             | 18            | NDC80     | DZ 2   |    |
| 0             | 1.322291  | 0.562 | 0.014 | 0             | 18            | KIF23     | DZ 2   |    |
| 0             | 1.295784  | 0.605 | 0.015 | 0             | 18            | BUB1      | DZ 2   |    |
| 0             | 1.285366  | 0.617 | 0.02  | 0             | 18            | PRC1      | DZ 2   |    |
| 0             | 1.269637  | 0.58  | 0.007 | 0             | 18            | NEK2      | DZ 2   |    |
| 0             | 1.242335  | 0.585 | 0.015 | 0             | 18            | CEP55     | DZ 2   |    |
| 0             | 1.209507  | 0.991 | 0.843 | 0             | 18            | HNRNPA2B1 |        | DZ |
| 2             |           |       |       |               |               |           |        |    |
| 0             | 1.116435  | 0.518 | 0.012 | 0             | 18            | CKAP2L    | DZ 2   |    |
| 0             | 1.085137  | 0.482 | 0.013 | 0             | 18            | HJURP     | DZ 2   |    |
| 0             | 0.9269084 |       | 0.449 | 0.011         | 0             | 18        | KIF4A  | DZ |
| 2             |           |       |       |               |               |           |        |    |
| 0             | 0.8712773 |       | 0.417 | 0.004         | 0             | 18        | KIF20A | DZ |
| 2             |           |       |       |               |               |           |        |    |
| 0             | 0.7202793 |       | 0.355 | 0.002         | 0             | 18        | PSRC1  | DZ |
| 2             |           |       |       |               |               |           |        |    |
| 4.940656e-324 | 1.471386  | 0.798 | 0.172 | 8.808696e-320 | 18            |           |        |    |
| TUBA1C        | DZ 2      |       |       |               |               |           |        |    |
| 9.881313e-324 | 1.50023   | 0.887 | 0.245 | 1.761739e-319 | 18            |           |        |    |
| RAD21         | DZ 2      |       |       |               |               |           |        |    |
| 6.422853e-322 | 0.9611329 |       | 0.486 | 0.016         | 1.145131e-317 | 18        |        |    |
| SPAG5         | DZ 2      |       |       |               |               |           |        |    |
| 6.743996e-321 | 1.535756  | 0.915 | 0.278 | 1.202387e-316 | 18            |           | DCK    |    |
| DZ 2          |           |       |       |               |               |           |        |    |
| 6.201222e-317 | 1.134097  | 0.571 | 0.03  | 1.105616e-312 | 18            |           |        |    |
| RACGAP1       | DZ 2      |       |       |               |               |           |        |    |
| 2.756378e-314 | 1.312351  | 0.685 | 0.057 | 4.914346e-310 | 18            |           |        |    |



|               |         |           |       |       |               |               |     |
|---------------|---------|-----------|-------|-------|---------------|---------------|-----|
| SG01          | DZ 2    |           |       |       |               |               |     |
| 3.80328e-312  |         | 0.871056  | 0.437 | 0.011 | 6.780868e-308 | 18            | TTK |
|               | DZ 2    |           |       |       |               |               |     |
| 4.991372e-308 |         | 1.483685  | 0.841 | 0.175 | 8.899117e-304 | 18            |     |
| KIF20B        | DZ 2    |           |       |       |               |               |     |
| 7.348135e-307 |         | 1.49735   | 0.865 | 0.252 | 1.310099e-302 | 18            |     |
| ANP32E        | DZ 2    |           |       |       |               |               |     |
| 1.388821e-305 |         | 1.589186  | 0.89  | 0.223 | 2.476129e-301 | 18            |     |
| UBE2J1        | DZ 2    |           |       |       |               |               |     |
| 7.836004e-302 |         | 1.392883  | 0.672 | 0.064 | 1.397081e-297 | 18            |     |
| CDC25B        | DZ 2    |           |       |       |               |               |     |
| 1.152151e-300 |         | 0.8759544 |       | 0.427 | 0.012         | 2.05417e-296  | 18  |
|               | DEPDC1B |           |       |       |               |               |     |
|               | DZ 2    |           |       |       |               |               |     |
| 3.454788e-296 |         | 1.295659  | 0.991 | 0.764 | 6.159542e-292 | 18            |     |
| HMG1          | DZ 2    |           |       |       |               |               |     |
| 9.836924e-294 |         | 1.156866  | 0.562 | 0.041 | 1.753825e-289 | 18            |     |
| SHCBP1        | DZ 2    |           |       |       |               |               |     |
| 1.016863e-293 |         | 1.076826  | 0.553 | 0.033 | 1.812965e-289 | 18            |     |
| MND1          | DZ 2    |           |       |       |               |               |     |
| 7.226309e-292 |         | 1.448172  | 0.808 | 0.166 | 1.288379e-287 | 18            |     |
| PLIN3         | DZ 2    |           |       |       |               |               |     |
| 5.976797e-290 |         | 1.347787  | 0.948 | 0.443 | 1.065603e-285 | 18            |     |
| MRPL51        | DZ 2    |           |       |       |               |               |     |
| 4.185145e-288 |         | 1.154991  | 0.997 | 0.886 | 7.461696e-284 | 18            |     |
| GAPDH         | DZ 2    |           |       |       |               |               |     |
| 6.56162e-285  |         | 1.452598  | 0.806 | 0.18  | 1.169871e-280 | 18            | LBR |
|               | DZ 2    |           |       |       |               |               |     |
| 2.637588e-283 |         | 0.7899826 |       | 0.359 | 0.005         | 4.702555e-279 | 18  |
|               | KIF14   |           |       |       |               |               |     |
|               | DZ 2    |           |       |       |               |               |     |
| 5.403451e-281 |         | 0.9560786 |       | 0.486 | 0.022         | 9.633813e-277 | 18  |
|               | NCAPG   |           |       |       |               |               |     |
|               | DZ 2    |           |       |       |               |               |     |
| 4.189973e-278 |         | 1.053738  | 1     | 0.99  | 7.470303e-274 | 18            |     |
| ACTB          | DZ 2    |           |       |       |               |               |     |
| 2.770883e-274 |         | 1.399583  | 0.887 | 0.299 | 4.940207e-270 | 18            |     |
| CALM3         | DZ 2    |           |       |       |               |               |     |
| 8.36514e-270  |         | 1.325308  | 0.72  | 0.09  | 1.491421e-265 | 18            |     |
| MYBL2         | DZ 2    |           |       |       |               |               |     |
| 6.066244e-263 |         | 1.273344  | 0.925 | 0.408 | 1.081551e-258 | 18            |     |
| DDX39A        | DZ 2    |           |       |       |               |               |     |
| 2.201856e-260 |         | 0.858601  | 0.437 | 0.013 | 3.925688e-256 | 18            |     |
| PRR11         | DZ 2    |           |       |       |               |               |     |
| 1.021778e-259 |         | 1.224203  | 0.947 | 0.448 | 1.821729e-255 | 18            |     |
| LSM5          | DZ 2    |           |       |       |               |               |     |
| 3.630629e-259 |         | 0.8105835 |       | 0.413 | 0.018         | 6.473048e-255 | 18  |
|               | NCAPH   |           |       |       |               |               |     |
|               | DZ 2    |           |       |       |               |               |     |
| 1.165609e-258 |         | 0.7058656 |       | 0.338 | 0.007         | 2.078164e-254 | 18  |
|               | FAM83D  |           |       |       |               |               |     |
|               | DZ 2    |           |       |       |               |               |     |
| 3.432235e-256 |         | 1.037365  | 1     | 0.932 | 6.119332e-252 | 18            |     |
| SERF2         | DZ 2    |           |       |       |               |               |     |
| 7.018754e-251 |         | 1.497876  | 0.803 | 0.18  | 1.251374e-246 | 18            |     |

|               |           |           |       |       |               |               |     |
|---------------|-----------|-----------|-------|-------|---------------|---------------|-----|
| DAAM1         | DZ 2      |           |       |       |               |               |     |
| 1.148958e-249 |           | 1.389946  | 0.769 | 0.143 | 2.048478e-245 | 18            |     |
| CD81          | DZ 2      |           |       |       |               |               |     |
| 1.204582e-247 |           | 0.8839238 |       | 0.437 | 0.017         | 2.147649e-243 | 18  |
|               | ARHGAP11A |           | DZ 2  |       |               |               |     |
| 1.461405e-247 |           | 1.235531  | 0.699 | 0.104 | 2.605539e-243 | 18            |     |
| SKA2          | DZ 2      |           |       |       |               |               |     |
| 6.889758e-247 |           | 1.444377  | 0.771 | 0.123 | 1.228375e-242 | 18            |     |
| NEIL1         | DZ 2      |           |       |       |               |               |     |
| 1.343124e-246 |           | 1.254053  | 0.699 | 0.106 | 2.394656e-242 | 18            |     |
| LMNB1         | DZ 2      |           |       |       |               |               |     |
| 9.105196e-244 |           | 1.305391  | 0.899 | 0.304 | 1.623365e-239 | 18            |     |
| HMG3          | DZ 2      |           |       |       |               |               |     |
| 8.855673e-243 |           | 1.24108   | 0.63  | 0.09  | 1.578878e-238 | 18            |     |
| FAM241A       | DZ 2      |           |       |       |               |               |     |
| 3.605208e-242 |           | 0.9876115 |       | 0.434 | 0.022         | 6.427725e-238 | 18  |
|               | MXD3      |           | DZ 2  |       |               |               |     |
| 2.630292e-239 |           | 0.6283941 |       | 0.26  | 0.003         | 4.689547e-235 | 18  |
|               | FAM72D    |           | DZ 2  |       |               |               |     |
| 3.433228e-236 |           | 1.496371  | 0.79  | 0.137 | 6.121101e-232 | 18            | BIK |
|               | DZ 2      |           |       |       |               |               |     |
| 7.771241e-236 |           | 1.190371  | 0.759 | 0.143 | 1.385535e-231 | 18            |     |
| MZT1          | DZ 2      |           |       |       |               |               |     |
| 1.485216e-230 |           | 1.305626  | 0.956 | 0.598 | 2.647991e-226 | 18            |     |
| DYNLL1        | DZ 2      |           |       |       |               |               |     |
| 2.366676e-229 |           | 1.182234  | 0.947 | 0.499 | 4.219547e-225 | 18            |     |
| MZT2B         | DZ 2      |           |       |       |               |               |     |
| 5.775008e-229 |           | 1.282091  | 0.931 | 0.476 | 1.029626e-224 | 18            |     |
| RPS27L        | DZ 2      |           |       |       |               |               |     |
| 1.74537e-226  |           | 0.939948  | 0.504 | 0.028 | 3.11182e-222  | 18            |     |
| KNL1          | DZ 2      |           |       |       |               |               |     |
| 3.763267e-226 |           | 0.7782422 |       | 0.382 | 0.014         | 6.709528e-222 | 18  |
|               | CCNF      |           | DZ 2  |       |               |               |     |
| 3.316885e-225 |           | 0.8846557 |       | 0.995 | 0.938         | 5.913675e-221 | 18  |
|               | H3F3A     |           | DZ 2  |       |               |               |     |
| 1.070123e-220 |           | 0.7742644 |       | 0.38  | 0.016         | 1.907922e-216 | 18  |
|               | KIF11     |           | DZ 2  |       |               |               |     |
| 7.310895e-219 |           | 1.191561  | 0.926 | 0.415 | 1.303459e-214 | 18            | DEK |
|               | DZ 2      |           |       |       |               |               |     |
| 1.56798e-216  |           | 1.185386  | 0.975 | 0.744 | 2.795552e-212 | 18            |     |
| HSP90AA1      | DZ 2      |           |       |       |               |               |     |
| 1.590807e-214 |           | 1.172124  | 0.926 | 0.482 | 2.83625e-210  | 18            |     |
| CBX3          | DZ 2      |           |       |       |               |               |     |
| 2.269324e-212 |           | 1.154902  | 0.683 | 0.09  | 4.045978e-208 | 18            |     |
| CENPM         | DZ 2      |           |       |       |               |               |     |
| 4.826472e-212 |           | -2.278982 |       | 0.238 | 0.706         | 8.605117e-208 | 18  |
|               | EMP3      |           | DZ 2  |       |               |               |     |
| 7.936292e-212 |           | 1.132673  | 0.724 | 0.131 | 1.414962e-207 | 18            |     |
| SMC2          | DZ 2      |           |       |       |               |               |     |
| 1.586707e-211 |           | 1.362683  | 0.789 | 0.192 | 2.828939e-207 | 18            |     |

|               |        |           |       |       |               |               |
|---------------|--------|-----------|-------|-------|---------------|---------------|
| HMCES         | DZ 2   |           |       |       |               |               |
| 2.148119e-209 |        | 1.246139  | 0.873 | 0.303 | 3.829882e-205 | 18            |
| PSIP1         | DZ 2   |           |       |       |               |               |
| 1.032758e-208 |        | 0.9627688 |       | 0.519 | 0.044         | 1.841304e-204 |
|               | SPDL1  |           |       |       |               | 18            |
| 5.274261e-208 |        | 0.7042729 |       | 0.365 | 0.014         | 9.40348e-204  |
|               | BUB1B  |           |       |       |               | 18            |
| 4.887267e-207 |        | 0.8965276 |       | 0.99  | 0.867         | 8.713508e-203 |
|               | ARPC2  |           |       |       |               | 18            |
| 3.597448e-203 |        | 1.122287  | 0.99  | 0.782 | 6.41389e-199  | 18            |
| ACTG1         | DZ 2   |           |       |       |               |               |
| 2.440318e-202 |        | 0.8430239 |       | 0.426 | 0.026         | 4.350843e-198 |
|               | PARPBP |           |       |       |               | 18            |
| 1.653498e-201 |        | 1.228241  | 0.797 | 0.197 | 2.948021e-197 | 18            |
| EAF2          | DZ 2   |           |       |       |               |               |
| 3.881662e-201 |        | 1.326691  | 0.716 | 0.084 | 6.920615e-197 | 18            |
| PCLAF         | DZ 2   |           |       |       |               |               |
| 1.158658e-200 |        | 1.22141   | 0.903 | 0.366 | 2.065772e-196 | 18            |
| ACADM         | DZ 2   |           |       |       |               |               |
| 5.327362e-198 |        | 0.8983124 |       | 0.443 | 0.024         | 9.498154e-194 |
|               | SPC25  |           |       |       |               | 18            |
| 2.312027e-197 |        | 1.12675   | 0.747 | 0.151 | 4.122114e-193 | 18            |
| TMP0          | DZ 2   |           |       |       |               |               |
| 8.563128e-196 |        | 1.105931  | 0.953 | 0.545 | 1.52672e-191  | 18            |
| TCEA1         | DZ 2   |           |       |       |               |               |
| 1.275709e-195 |        | 1.080641  | 0.699 | 0.144 | 2.274461e-191 | 18            |
| DTYMK         | DZ 2   |           |       |       |               |               |
| 2.892961e-193 |        | 1.129906  | 0.855 | 0.314 | 5.15786e-189  | 18            |
| IMP4          | DZ 2   |           |       |       |               |               |
| 5.114021e-193 |        | 1.050054  | 0.483 | 0.048 | 9.117787e-189 | 18            |
| TUBB2A        | DZ 2   |           |       |       |               |               |
| 1.3009e-190   |        | 1.082569  | 0.803 | 0.234 | 2.319375e-186 | 18            |
| DCTN3         | DZ 2   |           |       |       |               |               |
| 4.401822e-189 |        | 1.174452  | 0.832 | 0.265 | 7.848008e-185 | 18            |
| ITGAE         | DZ 2   |           |       |       |               |               |
| 3.795728e-188 |        | -1.142027 |       | 0.994 | 0.998         | 6.767404e-184 |
|               | B2M    |           |       |       |               | 18            |
| 1.645756e-187 |        | 1.086195  | 0.684 | 0.139 | 2.934218e-183 | 18            |
| SMARCA4       | DZ 2   |           |       |       |               |               |
| 5.053668e-185 |        | 2.693151  | 0.797 | 0.416 | 9.010185e-181 | 18            |
| HIST1H4C      | DZ 2   |           |       |       |               |               |
| 2.275518e-183 |        | 1.046828  | 0.619 | 0.092 | 4.057021e-179 | 18            |
| AC084033.3    | DZ 2   |           |       |       |               |               |
| 3.866821e-183 |        | 1.083953  | 0.912 | 0.449 | 6.894155e-179 | 18            |
| COX17         | DZ 2   |           |       |       |               |               |
| 3.060289e-181 |        | 0.6846239 |       | 0.352 | 0.019         | 5.456188e-177 |
|               | OIP5   |           |       |       |               | 18            |
| 4.344211e-181 |        | 0.9392454 |       | 0.526 | 0.053         | 7.745294e-177 |
|               | CCDC18 |           |       |       |               | 18            |
| 3.770847e-178 |        | 0.9012959 |       | 0.99  | 0.849         | 6.723042e-174 |

|               |                |       |       |               |    |     |
|---------------|----------------|-------|-------|---------------|----|-----|
| ATP5MG        | DZ 2           |       |       |               |    |     |
| 1.31006e-177  | 0.8961668      | 0.475 | 0.044 | 2.335706e-173 | 18 |     |
| RPL39L        | DZ 2           |       |       |               |    |     |
| 4.199067e-177 | 1.062103 0.907 | 0.451 |       | 7.486516e-173 | 18 |     |
| RAP1B         | DZ 2           |       |       |               |    |     |
| 1.832368e-176 | 0.9141118      | 0.966 | 0.622 | 3.266928e-172 | 18 |     |
| ATP5F1B       | DZ 2           |       |       |               |    |     |
| 2.019793e-176 | 1.178222 0.712 | 0.151 |       | 3.60109e-172  | 18 |     |
| C12orf75      | DZ 2           |       |       |               |    |     |
| 3.100951e-174 | 1.078475 0.883 | 0.366 |       | 5.528686e-170 | 18 |     |
| PTP4A2        | DZ 2           |       |       |               |    |     |
| 1.588691e-172 | 1.15273 0.973  | 0.65  |       | 2.832477e-168 | 18 |     |
| TCL1A         | DZ 2           |       |       |               |    |     |
| 8.112938e-171 | 1.184712 0.63  | 0.112 |       | 1.446456e-166 | 18 | LPP |
|               | DZ 2           |       |       |               |    |     |
| 2.991881e-170 | 0.9441756      | 0.959 | 0.652 | 5.334224e-166 | 18 |     |
| SLC25A5       | DZ 2           |       |       |               |    |     |
| 2.036668e-169 | 0.9494732      | 0.981 | 0.689 | 3.631175e-165 | 18 |     |
| EZR           | DZ 2           |       |       |               |    |     |
| 1.331194e-168 | 1.142816 0.724 | 0.151 |       | 2.373385e-164 | 18 |     |
| SUSD3         | DZ 2           |       |       |               |    |     |
| 5.548028e-168 | 1.066302 0.9   | 0.421 |       | 9.891579e-164 | 18 |     |
| DNAJA1        | DZ 2           |       |       |               |    |     |
| 1.559502e-167 | 0.8276687      | 0.981 | 0.744 | 2.780436e-163 | 18 |     |
| RAN           | DZ 2           |       |       |               |    |     |
| 7.468644e-167 | 0.7302705      | 0.992 | 0.918 | 1.331585e-162 | 18 |     |
| CFL1          | DZ 2           |       |       |               |    |     |
| 2.930492e-166 | 0.6100509      | 0.999 | 0.999 | 5.224774e-162 | 18 |     |
| PTMA          | DZ 2           |       |       |               |    |     |
| 7.907303e-165 | 1.12137 0.731  | 0.159 |       | 1.409793e-160 | 18 |     |
| CCDC88A       | DZ 2           |       |       |               |    |     |
| 2.219061e-164 | 1.077861 0.727 | 0.195 |       | 3.956364e-160 | 18 |     |
| UBALD2        | DZ 2           |       |       |               |    |     |
| 1.661363e-163 | 0.7574158      | 0.389 | 0.029 | 2.962043e-159 | 18 |     |
| NUGGC         | DZ 2           |       |       |               |    |     |
| 4.468947e-163 | 0.9382365      | 0.946 | 0.577 | 7.967686e-159 | 18 |     |
| ANP32B        | DZ 2           |       |       |               |    |     |
| 6.886853e-162 | 0.5157085      | 0.266 | 0.008 | 1.227857e-157 | 18 |     |
| ARHGEF39      | DZ 2           |       |       |               |    |     |
| 1.109721e-161 | 0.7547665      | 0.991 | 0.881 | 1.978522e-157 | 18 |     |
| H3F3B         | DZ 2           |       |       |               |    |     |
| 1.966415e-161 | -2.095149      | 0.117 | 0.551 | 3.505922e-157 | 18 |     |
| CCR7          | DZ 2           |       |       |               |    |     |
| 1.115274e-160 | 0.98649 0.904  | 0.385 |       | 1.988421e-156 | 18 |     |
| YWHAE         | DZ 2           |       |       |               |    |     |
| 9.680645e-160 | 0.9220072      | 0.974 | 0.732 | 1.725962e-155 | 18 |     |
| HSPA8         | DZ 2           |       |       |               |    |     |
| 5.52896e-157  | 1.04089 0.744  | 0.214 |       | 9.857582e-153 | 18 |     |
| HSPH1         | DZ 2           |       |       |               |    |     |
| 3.197953e-156 | 1.134072 0.852 | 0.41  |       | 5.70163e-152  | 18 |     |

|               |         |           |       |       |               |    |
|---------------|---------|-----------|-------|-------|---------------|----|
| METAP2        | DZ 2    |           |       |       |               |    |
| 3.142e-153    |         | 0.8703699 | 0.975 | 0.811 | 5.601872e-149 | 18 |
|               | COR01A  | DZ 2      |       |       |               |    |
| 4.52909e-152  |         | 0.9418654 | 0.937 | 0.533 | 8.074915e-148 | 18 |
|               | PARP1   | DZ 2      |       |       |               |    |
| 1.590928e-151 |         | 0.8624749 | 0.51  | 0.065 | 2.836466e-147 | 18 |
|               | HAUS8   | DZ 2      |       |       |               |    |
| 4.366997e-151 |         | 1.034944  | 0.545 | 0.083 | 7.785919e-147 | 18 |
|               | GCSAM   | DZ 2      |       |       |               |    |
| 6.995161e-151 |         | 0.9345876 | 0.939 | 0.55  | 1.247167e-146 | 18 |
|               | ATP5IF1 | DZ 2      |       |       |               |    |
| 1.547238e-150 |         | 1.061719  | 0.738 | 0.209 | 2.75857e-146  | 18 |
|               | NANS    | DZ 2      |       |       |               |    |
| 4.139915e-149 |         | 0.7705157 | 0.46  | 0.054 | 7.381055e-145 | 18 |
|               | EMC9    | DZ 2      |       |       |               |    |
| 5.567965e-149 |         | 0.9839152 | 0.804 | 0.295 | 9.927125e-145 | 18 |
|               | UGP2    | DZ 2      |       |       |               |    |
| 8.07502e-149  |         | 0.9398365 | 0.894 | 0.411 | 1.439695e-144 | 18 |
|               | HNRNPD  | DZ 2      |       |       |               |    |
| 1.375121e-148 |         | 0.873097  | 0.482 | 0.054 | 2.451704e-144 | 18 |
|               | G2E3    | DZ 2      |       |       |               |    |
| 1.690216e-147 |         | 0.8794205 | 0.955 | 0.628 | 3.013486e-143 | 18 |
|               | PSMA4   | DZ 2      |       |       |               |    |
| 2.410462e-147 |         | 1.006145  | 0.826 | 0.279 | 4.297613e-143 | 18 |
|               | BCAS4   | DZ 2      |       |       |               |    |
| 1.364682e-146 |         | 0.8683928 | 0.54  | 0.09  | 2.433091e-142 | 18 |
|               | PHF19   | DZ 2      |       |       |               |    |
| 1.860884e-146 |         | 0.4745467 | 0.222 | 0.005 | 3.31777e-142  | 18 |
|               | SAPCD2  | DZ 2      |       |       |               |    |
| 4.708078e-146 |         | 1.077748  | 0.861 | 0.34  | 8.394032e-142 | 18 |
|               | S100A10 | DZ 2      |       |       |               |    |
| 4.807955e-146 |         | 0.3903089 | 0.219 | 0.005 | 8.572104e-142 | 18 |
|               | CDC25C  | DZ 2      |       |       |               |    |
| 5.617244e-146 |         | 0.5588053 | 0.285 | 0.01  | 1.001499e-141 | 18 |
|               | ECT2    | DZ 2      |       |       |               |    |
| 8.040717e-145 |         | 0.9872095 | 0.641 | 0.138 | 1.433579e-140 | 18 |
|               | SEC14L1 | DZ 2      |       |       |               |    |
| 2.383633e-144 |         | 1.068439  | 0.839 | 0.331 | 4.24978e-140  | 18 |
|               | LRMP    | DZ 2      |       |       |               |    |
| 1.2341e-143   |         | 0.6058686 | 0.317 | 0.016 | 2.200276e-139 | 18 |
|               | KIF18A  | DZ 2      |       |       |               |    |
| 2.088822e-142 |         | 0.9861973 | 0.591 | 0.095 | 3.724161e-138 | 18 |
|               | RMI2    | DZ 2      |       |       |               |    |
| 1.451517e-141 |         | 0.977474  | 0.756 | 0.217 | 2.587909e-137 | 18 |
|               | UBE2G1  | DZ 2      |       |       |               |    |
| 2.612219e-141 |         | 0.725399  | 0.433 | 0.041 | 4.657325e-137 | 18 |
|               | RCCD1   | DZ 2      |       |       |               |    |
| 3.162088e-141 |         | 0.9294752 | 0.722 | 0.185 | 5.637686e-137 | 18 |
|               | CBX5    | DZ 2      |       |       |               |    |
| 9.358852e-141 |         | 1.122735  | 0.378 | 0.043 | 1.66859e-136  | 18 |

|               |                |       |               |               |    |  |
|---------------|----------------|-------|---------------|---------------|----|--|
| HES6          | DZ 2           |       |               |               |    |  |
| 1.013496e-140 | 0.9935137      | 0.795 | 0.25          | 1.806963e-136 | 18 |  |
|               | DZ 2           |       |               |               |    |  |
| 4.847886e-140 | 0.8989988      | 0.608 | 0.113         | 8.643296e-136 | 18 |  |
|               | DZ 2           |       |               |               |    |  |
| 2.718185e-138 | -0.8861703     | 0.995 | 0.999         | 4.846251e-134 | 18 |  |
|               | DZ 2           |       |               |               |    |  |
| 3.091483e-138 | 1.013893 0.707 | 0.184 | 5.511805e-134 | 18            |    |  |
| DNMT1         | DZ 2           |       |               |               |    |  |
| 9.760616e-137 | 0.9478903      | 0.503 | 0.067         | 1.74022e-132  | 18 |  |
|               | DZ 2           |       |               |               |    |  |
| 1.810074e-136 | 0.9369586      | 0.825 | 0.338         | 3.227181e-132 | 18 |  |
|               | DZ 2           |       |               |               |    |  |
| 3.721094e-136 | 0.9208718      | 0.707 | 0.183         | 6.634338e-132 | 18 |  |
|               | DZ 2           |       |               |               |    |  |
| 9.302501e-136 | 0.8060639      | 0.557 | 0.096         | 1.658543e-131 | 18 |  |
|               | DZ 2           |       |               |               |    |  |
| 1.203905e-134 | 0.9408761      | 0.784 | 0.272         | 2.146443e-130 | 18 |  |
|               | DZ 2           |       |               |               |    |  |
| 4.913299e-133 | 0.3413116      | 0.146 | 0.001         | 8.759921e-129 | 18 |  |
|               | DZ 2           |       |               |               |    |  |
| 5.239355e-133 | 0.7903232      | 0.921 | 0.526         | 9.341246e-129 | 18 |  |
|               | DZ 2           |       |               |               |    |  |
| 5.659375e-133 | 0.9133636      | 0.605 | 0.112         | 1.00901e-128  | 18 |  |
|               | DZ 2           |       |               |               |    |  |
| 1.243433e-130 | 0.8442521      | 0.877 | 0.428         | 2.216918e-126 | 18 |  |
|               | DZ 2           |       |               |               |    |  |
| 1.80406e-130  | 0.5433842      | 0.28  | 0.013         | 3.216459e-126 | 18 |  |
|               | DZ 2           |       |               |               |    |  |
| 2.332175e-130 | 0.8425735      | 0.554 | 0.109         | 4.158035e-126 | 18 |  |
|               | DZ 2           |       |               |               |    |  |
| 3.215716e-130 | -0.8645686     | 1     | 0.999         | 5.7333e-126   | 18 |  |
|               | DZ 2           |       |               |               |    |  |
| 5.10064e-130  | 0.7849428      | 0.494 | 0.072         | 9.093931e-126 | 18 |  |
|               | DZ 2           |       |               |               |    |  |
| 1.641964e-129 | 0.9025168      | 0.775 | 0.275         | 2.927457e-125 | 18 |  |
|               | DZ 2           |       |               |               |    |  |
| 2.149433e-129 | 0.8942767      | 0.47  | 0.077         | 3.832224e-125 | 18 |  |
|               | DZ 2           |       |               |               |    |  |
| 3.15829e-129  | 0.9182078      | 0.655 | 0.157         | 5.630915e-125 | 18 |  |
|               | DZ 2           |       |               |               |    |  |
| 6.228417e-129 | 0.9668373      | 0.851 | 0.373         | 1.110464e-124 | 18 |  |
|               | DZ 2           |       |               |               |    |  |
| 7.016005e-129 | 0.9080544      | 0.753 | 0.241         | 1.250884e-124 | 18 |  |
|               | DZ 2           |       |               |               |    |  |
| 1.056384e-128 | 1.014414 0.552 | 0.124 | 1.883428e-124 | 18            |    |  |
| PHGDH         | DZ 2           |       |               |               |    |  |
| 1.024601e-127 | 0.704482 0.399 | 0.034 | 1.826761e-123 | 18            |    |  |
| POLH          | DZ 2           |       |               |               |    |  |
| 3.721563e-127 | 0.6781014      | 0.358 | 0.028         | 6.635175e-123 | 18 |  |

|               |           |       |       |               |    |  |
|---------------|-----------|-------|-------|---------------|----|--|
| MYEF2         | DZ 2      |       |       |               |    |  |
| 4.496862e-127 | 0.9136137 | 0.763 | 0.261 | 8.017455e-123 | 18 |  |
| TOP1          | DZ 2      |       |       |               |    |  |
| 9.566761e-127 | 0.9019254 | 0.72  | 0.241 | 1.705658e-122 | 18 |  |
| KIF5B         | DZ 2      |       |       |               |    |  |
| 1.87574e-126  | 0.8286412 | 0.889 | 0.449 | 3.344256e-122 | 18 |  |
| SFPQ          | DZ 2      |       |       |               |    |  |
| 3.731952e-126 | 0.7775355 | 0.946 | 0.602 | 6.653697e-122 | 18 |  |
| POMP          | DZ 2      |       |       |               |    |  |
| 6.200866e-126 | 0.6817761 | 0.389 | 0.037 | 1.105552e-121 | 18 |  |
| CKAP5         | DZ 2      |       |       |               |    |  |
| 7.925869e-126 | 0.7368896 | 0.396 | 0.039 | 1.413103e-121 | 18 |  |
| MYBL1         | DZ 2      |       |       |               |    |  |
| 1.037272e-125 | 0.6286355 | 0.33  | 0.021 | 1.849353e-121 | 18 |  |
| NCAPD2        | DZ 2      |       |       |               |    |  |
| 2.089258e-125 | 0.9030534 | 0.573 | 0.087 | 3.724938e-121 | 18 |  |
| WDR66         | DZ 2      |       |       |               |    |  |
| 3.78641e-125  | 0.8433206 | 0.92  | 0.511 | 6.750791e-121 | 18 |  |
| COX8A         | DZ 2      |       |       |               |    |  |
| 2.353974e-124 | 0.7557358 | 0.981 | 0.773 | 4.196901e-120 | 18 |  |
| ARHGDIB       | DZ 2      |       |       |               |    |  |
| 3.268088e-124 | 0.6289548 | 0.36  | 0.029 | 5.826673e-120 | 18 |  |
| CIP2A         | DZ 2      |       |       |               |    |  |
| 3.438756e-124 | 0.8625549 | 0.62  | 0.119 | 6.130958e-120 | 18 |  |
| CCNG2         | DZ 2      |       |       |               |    |  |
| 5.240967e-124 | 0.8481067 | 0.877 | 0.433 | 9.34412e-120  | 18 |  |
| ACTR2         | DZ 2      |       |       |               |    |  |
| 5.883537e-124 | 0.7575398 | 0.949 | 0.683 | 1.048976e-119 | 18 |  |
| PPP1CA        | DZ 2      |       |       |               |    |  |
| 1.316252e-123 | 0.6587544 | 0.995 | 0.898 | 2.346746e-119 | 18 |  |
| PFN1          | DZ 2      |       |       |               |    |  |
| 7.597506e-123 | 0.888399  | 0.608 | 0.141 | 1.354559e-118 | 18 |  |
| PTPN18        | DZ 2      |       |       |               |    |  |
| 4.451387e-122 | 0.7123025 | 0.408 | 0.039 | 7.936378e-118 | 18 |  |
| GPSM2         | DZ 2      |       |       |               |    |  |
| 5.529015e-121 | 1.028738  | 0.523 | 0.109 | 9.857681e-117 | 18 |  |
| GMDS          | DZ 2      |       |       |               |    |  |
| 1.244406e-120 | 0.8080994 | 0.856 | 0.403 | 2.218652e-116 | 18 |  |
| MDH1          | DZ 2      |       |       |               |    |  |
| 2.408487e-120 | 0.8794893 | 0.574 | 0.103 | 4.294091e-116 | 18 |  |
| AC023590.1    | DZ 2      |       |       |               |    |  |
| 5.874766e-120 | 0.9089038 | 0.593 | 0.11  | 1.047412e-115 | 18 |  |
| CD38          | DZ 2      |       |       |               |    |  |
| 1.793422e-119 | 0.8914706 | 0.474 | 0.052 | 3.197493e-115 | 18 |  |
| TYMS          | DZ 2      |       |       |               |    |  |
| 4.205777e-119 | 0.8232156 | 0.778 | 0.283 | 7.498481e-115 | 18 |  |
| YWHAH         | DZ 2      |       |       |               |    |  |
| 6.589384e-119 | 0.9059778 | 0.835 | 0.294 | 1.174821e-114 | 18 |  |
| BCL7A         | DZ 2      |       |       |               |    |  |
| 4.267228e-118 | 0.6573301 | 0.39  | 0.041 | 7.60804e-114  | 18 |  |

|               |            |       |       |               |               |     |
|---------------|------------|-------|-------|---------------|---------------|-----|
| CENPN         | DZ 2       |       |       |               |               |     |
| 1.057116e-117 | 0.839495   | 0.821 | 0.357 | 1.884732e-113 | 18            |     |
| VPS29         | DZ 2       |       |       |               |               |     |
| 1.393049e-117 | 0.8090382  |       | 0.89  | 0.441         | 2.483667e-113 | 18  |
| SEM1          | DZ 2       |       |       |               |               |     |
| 2.890177e-117 | 0.8160871  |       | 0.816 | 0.314         | 5.152896e-113 | 18  |
| HSBP1         | DZ 2       |       |       |               |               |     |
| 1.050723e-116 | 0.8755383  |       | 0.812 | 0.321         | 1.873334e-112 | 18  |
| RFTN1         | DZ 2       |       |       |               |               |     |
| 1.149813e-116 | 0.6660753  |       | 0.979 | 0.868         | 2.050001e-112 | 18  |
| ARPC3         | DZ 2       |       |       |               |               |     |
| 4.986643e-116 | 0.8264718  |       | 0.826 | 0.368         | 8.890687e-112 | 18  |
| FAM107B       | DZ 2       |       |       |               |               |     |
| 1.429054e-115 | 0.7493695  |       | 0.433 | 0.055         | 2.54786e-111  | 18  |
| DCAF12        | DZ 2       |       |       |               |               |     |
| 2.383577e-115 | 0.8967321  |       | 0.854 | 0.39          | 4.249679e-111 | 18  |
| BASP1         | DZ 2       |       |       |               |               |     |
| 2.793011e-115 | -0.9803605 |       | 0.991 | 0.996         | 4.97966e-111  | 18  |
| RPS12         | DZ 2       |       |       |               |               |     |
| 8.871488e-115 | 0.7630337  |       | 0.955 | 0.695         | 1.581698e-110 | 18  |
| CCNI          | DZ 2       |       |       |               |               |     |
| 1.506729e-114 | 0.7572403  |       | 0.579 | 0.126         | 2.686346e-110 | 18  |
| NUP37         | DZ 2       |       |       |               |               |     |
| 2.859754e-114 | -0.7514079 |       | 0.999 | 1             | 5.098655e-110 | 18  |
| RPS27         | DZ 2       |       |       |               |               |     |
| 3.284139e-114 | 0.9091118  |       | 0.637 | 0.173         | 5.855291e-110 | 18  |
| ZNF106        | DZ 2       |       |       |               |               |     |
| 3.9057e-114   | -0.6256576 |       | 1     | 1             | 6.963473e-110 | 18  |
| RPL41         | DZ 2       |       |       |               |               |     |
| 8.36616e-114  | 0.6331805  |       | 0.307 | 0.027         | 1.491603e-109 | 18  |
| PTMS          | DZ 2       |       |       |               |               |     |
| 1.512712e-113 | 0.9109192  |       | 0.747 | 0.228         | 2.697015e-109 | 18  |
| GCHFR         | DZ 2       |       |       |               |               |     |
| 3.775809e-113 | 0.7706576  |       | 0.644 | 0.169         | 6.73189e-109  | 18  |
| PMVK          | DZ 2       |       |       |               |               |     |
| 3.879416e-113 | 0.8111092  |       | 0.839 | 0.357         | 6.916611e-109 | 18  |
| RBBP7         | DZ 2       |       |       |               |               |     |
| 1.470968e-112 | 0.6632872  |       | 0.398 | 0.05          | 2.622589e-108 | 18  |
| CENPU         | DZ 2       |       |       |               |               |     |
| 2.214339e-112 | -0.7790953 |       | 0.997 | 0.999         | 3.947944e-108 | 18  |
| RPL13         | DZ 2       |       |       |               |               |     |
| 1.918967e-111 | 0.7469055  |       | 0.39  | 0.044         | 3.421325e-107 | 18  |
| LINC01991     | DZ 2       |       |       |               |               |     |
| 3.246854e-111 | 0.842212   | 0.962 | 0.859 | 5.788816e-107 | 18            | UBB |
|               | DZ 2       |       |       |               |               |     |
| 5.868506e-110 | -1.223225  |       | 0.93  | 0.964         | 1.046296e-105 | 18  |
| FTL           | DZ 2       |       |       |               |               |     |
| 5.658208e-109 | 0.6822138  |       | 0.407 | 0.056         | 1.008802e-104 | 18  |
| ORC6          | DZ 2       |       |       |               |               |     |
| 3.597788e-108 | -0.9733123 |       | 0.997 | 1             | 6.414496e-104 | 18  |



|               |                |       |               |               |    |  |
|---------------|----------------|-------|---------------|---------------|----|--|
| MALAT1        | DZ 2           |       |               |               |    |  |
| 5.758856e-108 | 0.720149 0.944 | 0.578 | 1.026747e-103 | 18            |    |  |
| ATP5MC3       | DZ 2           |       |               |               |    |  |
| 7.71367e-108  | 0.4036779      | 0.211 | 0.009         | 1.37527e-103  | 18 |  |
| FOXM1         | DZ 2           |       |               |               |    |  |
| 9.718324e-108 | 0.7804595      | 0.652 | 0.18          | 1.73268e-103  | 18 |  |
| GLRX5         | DZ 2           |       |               |               |    |  |
| 1.170949e-107 | -0.788281      | 0.997 | 0.999         | 2.087686e-103 | 18 |  |
| RPL32         | DZ 2           |       |               |               |    |  |
| 3.77388e-107  | 0.7769254      | 0.547 | 0.119         | 6.728451e-103 | 18 |  |
| COMMD4        | DZ 2           |       |               |               |    |  |
| 1.142787e-106 | 0.7507345      | 0.87  | 0.432         | 2.037475e-102 | 18 |  |
| HMGA1         | DZ 2           |       |               |               |    |  |
| 1.193897e-106 | 0.7815646      | 0.444 | 0.066         | 2.128599e-102 | 18 |  |
| CDCA7         | DZ 2           |       |               |               |    |  |
| 1.555315e-106 | 0.7867752      | 0.812 | 0.338         | 2.772972e-102 | 18 |  |
| LSM6          | DZ 2           |       |               |               |    |  |
| 2.11561e-106  | 0.7173257      | 0.696 | 0.216         | 3.771921e-102 | 18 |  |
| DAZAP1        | DZ 2           |       |               |               |    |  |
| 4.507422e-106 | 0.735883 0.475 | 0.079 | 8.036282e-102 | 18            |    |  |
| BRD8          | DZ 2           |       |               |               |    |  |
| 6.182138e-106 | 0.7550955      | 0.583 | 0.144         | 1.102213e-101 | 18 |  |
| HDGF          | DZ 2           |       |               |               |    |  |
| 8.043328e-106 | 0.823872 0.495 | 0.09  | 1.434045e-101 | 18            |    |  |
| STAG3         | DZ 2           |       |               |               |    |  |
| 1.296073e-105 | 0.7724179      | 0.745 | 0.241         | 2.310768e-101 | 18 |  |
| PPP2R5C       | DZ 2           |       |               |               |    |  |
| 6.871416e-105 | 0.8035261      | 0.499 | 0.058         | 1.225105e-100 | 18 |  |
| TK1           | DZ 2           |       |               |               |    |  |
| 7.838496e-105 | 0.6792931      | 0.927 | 0.565         | 1.397525e-100 | 18 |  |
| RBM8A         | DZ 2           |       |               |               |    |  |
| 1.010458e-104 | 0.726422 0.843 | 0.381 | 1.801546e-100 | 18            |    |  |
| CCT5          | DZ 2           |       |               |               |    |  |
| 1.131184e-104 | 0.6719445      | 0.951 | 0.673         | 2.016787e-100 | 18 |  |
| HNRNPA3       | DZ 2           |       |               |               |    |  |
| 2.365551e-104 | 0.7601832      | 0.482 | 0.078         | 4.217541e-100 | 18 |  |
| TMEM131L      | DZ 2           |       |               |               |    |  |
| 3.806299e-104 | 0.4234472      | 0.231 | 0.011         | 6.78625e-100  | 18 |  |
| PLK4          | DZ 2           |       |               |               |    |  |
| 5.553661e-104 | 0.8017548      | 0.679 | 0.2           | 9.901622e-100 | 18 |  |
| MIS18BP1      | DZ 2           |       |               |               |    |  |
| 6.191807e-104 | 0.8511252      | 0.684 | 0.239         | 1.103937e-99  | 18 |  |
| TPM4          | DZ 2           |       |               |               |    |  |
| 7.83184e-104  | 0.6671816      | 0.426 | 0.053         | 1.396339e-99  | 18 |  |
| CENPK         | DZ 2           |       |               |               |    |  |
| 2.743733e-103 | 0.7734338      | 0.766 | 0.265         | 4.891802e-99  | 18 |  |
| POU2AF1       | DZ 2           |       |               |               |    |  |
| 3.280484e-103 | 0.7125783      | 0.896 | 0.467         | 5.848775e-99  | 18 |  |
| SNRPD1        | DZ 2           |       |               |               |    |  |
| 1.503935e-102 | 0.666027 0.439 | 0.069 | 2.681365e-98  | 18            |    |  |

|               |            |       |       |              |    |  |
|---------------|------------|-------|-------|--------------|----|--|
| EZH2          | DZ 2       |       |       |              |    |  |
| 4.285113e-102 | -0.7287315 | 0.999 | 0.999 | 7.639929e-98 | 18 |  |
|               | RPS27A     | DZ 2  |       |              |    |  |
| 6.025483e-102 | 0.5876154  | 0.328 | 0.036 | 1.074283e-97 | 18 |  |
|               | NDC1       | DZ 2  |       |              |    |  |
| 9.048373e-101 | 0.7904976  | 0.797 | 0.324 | 1.613235e-96 | 18 |  |
|               | BPTF       | DZ 2  |       |              |    |  |
| 1.086659e-100 | 0.8358724  | 0.785 | 0.295 | 1.937405e-96 | 18 |  |
|               | CD27       | DZ 2  |       |              |    |  |
| 1.178728e-100 | 0.6661898  | 0.952 | 0.635 | 2.101555e-96 | 18 |  |
|               | ERH        | DZ 2  |       |              |    |  |
| 2.358113e-100 | 0.7280591  | 0.602 | 0.152 | 4.20428e-96  | 18 |  |
|               | VRK1       | DZ 2  |       |              |    |  |
| 3.445727e-100 | -0.6719596 | 1     | 0.999 | 6.143386e-96 | 18 |  |
|               | RPL13A     | DZ 2  |       |              |    |  |
| 5.65139e-100  | 0.8160915  | 0.88  | 0.486 | 1.007586e-95 | 18 |  |
|               | C4orf3     | DZ 2  |       |              |    |  |
| 8.625323e-100 | 0.8490275  | 0.703 | 0.228 | 1.537809e-95 | 18 |  |
|               | CCND3      | DZ 2  |       |              |    |  |
| 9.548993e-100 | 0.7506438  | 0.606 | 0.16  | 1.70249e-95  | 18 |  |
|               | TFDP1      | DZ 2  |       |              |    |  |
| 1.955976e-99  | 0.6807416  | 0.943 | 0.648 | 3.48731e-95  | 18 |  |
|               | YWHAB      | DZ 2  |       |              |    |  |
| 2.137104e-99  | 0.5802954  | 0.342 | 0.035 | 3.810242e-95 | 18 |  |
|               | REEP4      | DZ 2  |       |              |    |  |
| 9.286143e-99  | 0.6870724  | 0.904 | 0.508 | 1.655626e-94 | 18 |  |
|               | SRP9       | DZ 2  |       |              |    |  |
| 1.007476e-98  | 0.7621068  | 0.799 | 0.343 | 1.796229e-94 | 18 |  |
|               | MRPS6      | DZ 2  |       |              |    |  |
| 1.416775e-98  | 0.4396489  | 0.215 | 0.012 | 2.525969e-94 | 18 |  |
|               | SPC24      | DZ 2  |       |              |    |  |
| 1.69339e-98   | 0.7779555  | 0.715 | 0.246 | 3.019145e-94 | 18 |  |
|               | MPC2       | DZ 2  |       |              |    |  |
| 1.876885e-98  | 0.8768726  | 0.47  | 0.071 | 3.346298e-94 | 18 |  |
|               | SUGCT      | DZ 2  |       |              |    |  |
| 9.872131e-98  | 0.7319562  | 0.89  | 0.421 | 1.760102e-93 | 18 |  |
|               | IRF8       | DZ 2  |       |              |    |  |
| 6.377924e-97  | 0.6558118  | 0.392 | 0.05  | 1.13712e-92  | 18 |  |
|               | MME        | DZ 2  |       |              |    |  |
| 1.592041e-96  | 0.7198859  | 0.891 | 0.517 | 2.83845e-92  | 18 |  |
|               | TRAPPC1    | DZ 2  |       |              |    |  |
| 2.05528e-96   | 0.4328803  | 0.232 | 0.016 | 3.664358e-92 | 18 |  |
|               | MELK       | DZ 2  |       |              |    |  |
| 3.544899e-96  | 0.7534387  | 0.845 | 0.408 | 6.320201e-92 | 18 |  |
|               | PPP1CC     | DZ 2  |       |              |    |  |
| 3.92862e-96   | 0.7402836  | 0.891 | 0.484 | 7.004336e-92 | 18 |  |
|               | RAC2       | DZ 2  |       |              |    |  |
| 5.059376e-96  | 0.3975943  | 0.19  | 0.011 | 9.020362e-92 | 18 |  |
|               | SKA3       | DZ 2  |       |              |    |  |
| 5.204746e-96  | 0.366236   | 0.197 | 0.01  | 9.279541e-92 | 18 |  |

|              |            |       |       |              |    |  |
|--------------|------------|-------|-------|--------------|----|--|
| SKA1         | DZ 2       |       |       |              |    |  |
| 5.707634e-96 | 0.5129023  | 0.246 | 0.019 | 1.017614e-91 | 18 |  |
|              | NPAS1      | DZ 2  |       |              |    |  |
| 6.579469e-96 | 0.6885149  | 0.525 | 0.112 | 1.173053e-91 | 18 |  |
|              | SS18       | DZ 2  |       |              |    |  |
| 9.379115e-96 | 0.7826992  | 0.53  | 0.105 | 1.672202e-91 | 18 |  |
|              | CPNE5      | DZ 2  |       |              |    |  |
| 1.005876e-95 | 0.7500291  | 0.823 | 0.376 | 1.793376e-91 | 18 |  |
|              | SMARCB1    | DZ 2  |       |              |    |  |
| 1.346182e-95 | 0.6736091  | 0.872 | 0.442 | 2.400107e-91 | 18 |  |
|              | ILF2       | DZ 2  |       |              |    |  |
| 1.554032e-95 | 0.7151614  | 0.645 | 0.174 | 2.770684e-91 | 18 |  |
|              | MED30      | DZ 2  |       |              |    |  |
| 1.556304e-95 | 0.6067393  | 0.394 | 0.041 | 2.774735e-91 | 18 |  |
|              | ASF1B      | DZ 2  |       |              |    |  |
| 4.939709e-95 | -1.136172  | 0.791 | 0.908 | 8.807007e-91 | 18 |  |
|              | IGHM       | DZ 2  |       |              |    |  |
| 1.264159e-94 | -0.9037611 | 0.984 | 0.991 | 2.253869e-90 | 18 |  |
|              | RPL9       | DZ 2  |       |              |    |  |
| 2.738306e-94 | -0.6099909 | 1     | 0.999 | 4.882125e-90 | 18 |  |
|              | RPLP1      | DZ 2  |       |              |    |  |
| 4.371282e-94 | -0.6505659 | 0.996 | 0.999 | 7.793559e-90 | 18 |  |
|              | RPS19      | DZ 2  |       |              |    |  |
| 6.158748e-94 | 0.7544112  | 0.753 | 0.276 | 1.098043e-89 | 18 |  |
|              | CARHSP1    | DZ 2  |       |              |    |  |
| 8.648073e-94 | 0.7149719  | 0.804 | 0.359 | 1.541865e-89 | 18 |  |
|              | EWSR1      | DZ 2  |       |              |    |  |
| 8.772244e-94 | 0.7266885  | 0.618 | 0.175 | 1.564003e-89 | 18 |  |
|              | TRABD      | DZ 2  |       |              |    |  |
| 4.569212e-93 | 0.6900258  | 0.939 | 0.582 | 8.146448e-89 | 18 |  |
|              | MARCKSL1   | DZ 2  |       |              |    |  |
| 6.461997e-93 | 0.6770993  | 0.92  | 0.528 | 1.152109e-88 | 18 |  |
|              | SRSF9      | DZ 2  |       |              |    |  |
| 7.801577e-93 | 0.5939709  | 0.97  | 0.718 | 1.390943e-88 | 18 |  |
|              | COX6C      | DZ 2  |       |              |    |  |
| 9.708439e-93 | 0.45689    | 0.224 | 0.017 | 1.730918e-88 | 18 |  |
|              | RGS9       | DZ 2  |       |              |    |  |
| 1.270632e-92 | 0.4625966  | 0.241 | 0.017 | 2.26541e-88  | 18 |  |
|              | ARHGAP11B  | DZ 2  |       |              |    |  |
| 1.795567e-92 | 0.4492766  | 0.273 | 0.022 | 3.201316e-88 | 18 |  |
|              | POC1A      | DZ 2  |       |              |    |  |
| 3.07576e-92  | 0.8430115  | 0.408 | 0.065 | 5.483772e-88 | 18 |  |
|              | RASSF6     | DZ 2  |       |              |    |  |
| 4.323926e-92 | 0.6765531  | 0.841 | 0.428 | 7.709128e-88 | 18 |  |
|              | LSM3       | DZ 2  |       |              |    |  |
| 5.658684e-92 | 0.5835949  | 0.304 | 0.032 | 1.008887e-87 | 18 |  |
|              | SCLT1      | DZ 2  |       |              |    |  |
| 6.673152e-92 | 0.7618184  | 0.771 | 0.314 | 1.189756e-87 | 18 |  |
|              | NAA38      | DZ 2  |       |              |    |  |
| 8.750449e-92 | 0.6515769  | 0.413 | 0.062 | 1.560117e-87 | 18 |  |

|              |                    |            |       |       |              |    |
|--------------|--------------------|------------|-------|-------|--------------|----|
| 4.24321e-91  | RRM2B<br>DZ 2      | 0.6624751  | 0.409 | 0.065 | 7.56522e-87  | 18 |
| 5.459555e-91 | RPRD1B<br>DZ 2     | 0.4055215  | 0.223 | 0.013 | 9.73384e-87  | 18 |
| 1.111455e-90 | KIF15<br>DZ 2      | -1.128654  | 0.848 | 0.906 | 1.981613e-86 | 18 |
| 4.284722e-90 | HLA-A<br>DZ 2      | 0.6778009  | 0.427 | 0.071 | 7.639231e-86 | 18 |
| 9.959162e-90 | KLHL6<br>DZ 2      | 0.3562069  | 0.188 | 0.008 | 1.775619e-85 | 18 |
| 2.498462e-89 | SMTN<br>DZ 2       | 0.7193799  | 0.488 | 0.106 | 4.454508e-85 | 18 |
| 5.877822e-89 | BRI3BP<br>DZ 2     | 0.4089532  | 0.192 | 0.009 | 1.047957e-84 | 18 |
| 7.839123e-89 | AC091057.6<br>DZ 2 | 0.7494347  | 0.528 | 0.12  | 1.397637e-84 | 18 |
| 9.984219e-89 | MSI2<br>DZ 2       | -1.880732  | 0.179 | 0.47  | 1.780086e-84 | 18 |
| 1.581448e-88 | S100A6<br>DZ 2     | 0.6961585  | 0.658 | 0.204 | 2.819563e-84 | 18 |
| 2.276328e-88 | CCAR1<br>DZ 2      | 0.7538911  | 0.566 | 0.132 | 4.058465e-84 | 18 |
| 2.94256e-88  | SOCS1<br>DZ 2      | 0.6217853  | 0.9   | 0.511 | 5.246291e-84 | 18 |
| 4.149554e-88 | ATP5PB<br>DZ 2     | 0.4437586  | 0.253 | 0.021 | 7.39824e-84  | 18 |
| 4.181278e-88 | CDCA5<br>DZ 2      | 0.6259863  | 0.426 | 0.073 | 7.454801e-84 | 18 |
| 1.536358e-87 | WEE1<br>DZ 2       | -0.7256418 | 0.997 | 0.998 | 2.739174e-83 | 18 |
| 1.741176e-87 | RPLP2<br>DZ 2      | 0.6569184  | 0.835 | 0.393 | 3.104343e-83 | 18 |
| 3.340685e-87 | ENY2<br>DZ 2       | -0.7650815 | 0.997 | 0.998 | 5.956107e-83 | 18 |
| 5.245824e-87 | RPL11<br>DZ 2      | 0.7124398  | 0.788 | 0.289 | 9.352779e-83 | 18 |
| 4.987713e-86 | GGA2<br>DZ 2       | 0.4803779  | 0.992 | 0.961 | 8.892594e-82 | 18 |
| 1.099823e-85 | OAZ1<br>DZ 2       | 0.4038247  | 0.189 | 0.01  | 1.960874e-81 | 18 |
| 3.080703e-85 | TBC1D4<br>DZ 2     | 0.5180943  | 0.288 | 0.027 | 5.492586e-81 | 18 |
| 4.164882e-85 | KMT5A<br>DZ 2      | 0.3583687  | 0.215 | 0.015 | 7.425569e-81 | 18 |
| 6.437764e-85 | TRIP13<br>DZ 2     | 0.6611474  | 0.675 | 0.232 | 1.147789e-80 | 18 |
| 7.356288e-85 | MORF4L2<br>DZ 2    | 0.6169366  | 0.933 | 0.615 | 1.311553e-80 | 18 |
| 2.125378e-84 | ACTR3<br>DZ 2      | -1.098715  | 0.943 | 0.961 | 3.789337e-80 | 18 |

|              |                |       |              |              |    |  |
|--------------|----------------|-------|--------------|--------------|----|--|
| MT-ND2       | DZ 2           |       |              |              |    |  |
| 3.447417e-84 | 0.624315 0.385 | 0.065 | 6.1464e-80   | 18           |    |  |
| TERF2        | DZ 2           |       |              |              |    |  |
| 4.395775e-84 | 0.6711677      | 0.615 | 0.182        | 7.837227e-80 | 18 |  |
| MAP2K1       | DZ 2           |       |              |              |    |  |
| 4.704778e-84 | 0.6538889      | 0.793 | 0.356        | 8.388148e-80 | 18 |  |
| PPP2CA       | DZ 2           |       |              |              |    |  |
| 5.082153e-84 | 0.729505 0.762 | 0.266 | 9.06097e-80  | 18           |    |  |
| NCF1         | DZ 2           |       |              |              |    |  |
| 5.621679e-84 | -1.304987      | 0.082 | 0.355        | 1.002289e-79 | 18 |  |
| LY6E         | DZ 2           |       |              |              |    |  |
| 1.646226e-83 | 0.5859675      | 0.385 | 0.056        | 2.935057e-79 | 18 |  |
| DTX1         | DZ 2           |       |              |              |    |  |
| 1.981462e-83 | 0.7014771      | 0.663 | 0.225        | 3.532748e-79 | 18 |  |
| MTF2         | DZ 2           |       |              |              |    |  |
| 3.315623e-83 | 0.682006 0.742 | 0.312 | 5.911424e-79 | 18           |    |  |
| PRDX2        | DZ 2           |       |              |              |    |  |
| 4.175422e-83 | 0.5877696      | 0.94  | 0.636        | 7.444359e-79 | 18 |  |
| HNRNPM       | DZ 2           |       |              |              |    |  |
| 7.826888e-83 | 0.4565138      | 0.242 | 0.022        | 1.395456e-78 | 18 |  |
| FANCI        | DZ 2           |       |              |              |    |  |
| 1.076575e-82 | 0.578879 0.948 | 0.64  | 1.919425e-78 | 18           |    |  |
| SNRPG        | DZ 2           |       |              |              |    |  |
| 5.056583e-82 | 0.7201869      | 0.553 | 0.14         | 9.015381e-78 | 18 |  |
| SH2B2        | DZ 2           |       |              |              |    |  |
| 5.590876e-82 | 0.5536737      | 0.321 | 0.046        | 9.967973e-78 | 18 |  |
| UCHL1        | DZ 2           |       |              |              |    |  |
| 6.560701e-82 | 0.6728337      | 0.799 | 0.358        | 1.169707e-77 | 18 |  |
| TERF2IP      | DZ 2           |       |              |              |    |  |
| 1.051536e-81 | 0.6702392      | 0.522 | 0.13         | 1.874783e-77 | 18 |  |
| CETN3        | DZ 2           |       |              |              |    |  |
| 1.412957e-81 | 0.6733176      | 0.823 | 0.433        | 2.519161e-77 | 18 |  |
| FDPS         | DZ 2           |       |              |              |    |  |
| 3.603027e-81 | 0.7769709      | 0.605 | 0.179        | 6.423836e-77 | 18 |  |
| P2RX5        | DZ 2           |       |              |              |    |  |
| 3.860748e-81 | 0.5278759      | 0.262 | 0.025        | 6.883327e-77 | 18 |  |
| TRIM59       | DZ 2           |       |              |              |    |  |
| 1.039627e-80 | 0.625085 0.867 | 0.439 | 1.853552e-76 | 18           |    |  |
| ATP5F1C      | DZ 2           |       |              |              |    |  |
| 1.824306e-80 | 0.7819606      | 0.911 | 0.527        | 3.252555e-76 | 18 |  |
| ISG20        | DZ 2           |       |              |              |    |  |
| 3.962879e-80 | 0.6192306      | 0.845 | 0.424        | 7.065417e-76 | 18 |  |
| ZNF706       | DZ 2           |       |              |              |    |  |
| 4.506005e-80 | 0.6495285      | 0.833 | 0.422        | 8.033757e-76 | 18 |  |
| KTN1         | DZ 2           |       |              |              |    |  |
| 6.227847e-80 | -0.6767346     | 1     | 0.998        | 1.110363e-75 | 18 |  |
| RPL18A       | DZ 2           |       |              |              |    |  |
| 7.848319e-80 | 0.6717256      | 0.516 | 0.122        | 1.399277e-75 | 18 |  |
| RABGAP1L     | DZ 2           |       |              |              |    |  |
| 9.897104e-80 | 0.662871 0.569 | 0.155 | 1.764555e-75 | 18           |    |  |

|              |                |       |              |              |    |  |
|--------------|----------------|-------|--------------|--------------|----|--|
| UBE2R2       | DZ 2           |       |              |              |    |  |
| 1.651564e-79 | -1.279662      | 0.13  | 0.387        | 2.944574e-75 | 18 |  |
| CD44         | DZ 2           |       |              |              |    |  |
| 5.4483e-79   | -0.7107645     | 0.991 | 0.995        | 9.713773e-75 | 18 |  |
| RPS25        | DZ 2           |       |              |              |    |  |
| 6.988991e-79 | 0.6658522      | 0.17  | 0.009        | 1.246067e-74 | 18 |  |
| IGLL1        | DZ 2           |       |              |              |    |  |
| 7.18446e-79  | 0.573213 0.882 | 0.49  | 1.280917e-74 | 18           |    |  |
| EIF4G2       | DZ 2           |       |              |              |    |  |
| 7.646498e-79 | 0.5959189      | 0.462 | 0.098        | 1.363294e-74 | 18 |  |
| CDC27        | DZ 2           |       |              |              |    |  |
| 9.479936e-79 | -0.9848906     | 0.955 | 0.969        | 1.690178e-74 | 18 |  |
| MT-ND3       | DZ 2           |       |              |              |    |  |
| 1.646851e-78 | 0.6432707      | 0.601 | 0.192        | 2.936171e-74 | 18 |  |
| NUDCD2       | DZ 2           |       |              |              |    |  |
| 1.651498e-78 | 0.5199342      | 0.319 | 0.048        | 2.944455e-74 | 18 |  |
| CDKN2C       | DZ 2           |       |              |              |    |  |
| 3.632796e-78 | 0.6848773      | 0.692 | 0.253        | 6.476912e-74 | 18 |  |
| CCDC69       | DZ 2           |       |              |              |    |  |
| 9.115399e-78 | 0.5345947      | 0.966 | 0.76         | 1.625185e-73 | 18 |  |
| MYL12A       | DZ 2           |       |              |              |    |  |
| 1.204733e-77 | 0.6823077      | 0.569 | 0.165        | 2.147918e-73 | 18 |  |
| BLOC1S6      | DZ 2           |       |              |              |    |  |
| 2.582057e-77 | 0.6577863      | 0.582 | 0.175        | 4.60355e-73  | 18 |  |
| RASGRP3      | DZ 2           |       |              |              |    |  |
| 1.096833e-76 | 0.6327243      | 0.446 | 0.095        | 1.955544e-72 | 18 |  |
| PTPN7        | DZ 2           |       |              |              |    |  |
| 1.364393e-76 | 0.6026192      | 0.802 | 0.367        | 2.432576e-72 | 18 |  |
| LCP1         | DZ 2           |       |              |              |    |  |
| 1.943479e-76 | 0.6291995      | 0.437 | 0.084        | 3.465029e-72 | 18 |  |
| DCP2         | DZ 2           |       |              |              |    |  |
| 2.750571e-76 | 0.6607255      | 0.773 | 0.33         | 4.903993e-72 | 18 |  |
| NDUFC1       | DZ 2           |       |              |              |    |  |
| 3.421325e-76 | 0.6567937      | 0.464 | 0.101        | 6.09988e-72  | 18 |  |
| E2F5         | DZ 2           |       |              |              |    |  |
| 7.517819e-76 | 0.5872158      | 0.464 | 0.103        | 1.340352e-71 | 18 |  |
| AZIN1        | DZ 2           |       |              |              |    |  |
| 7.661151e-76 | -0.7059695     | 0.997 | 0.996        | 1.365907e-71 | 18 |  |
| RPL35A       | DZ 2           |       |              |              |    |  |
| 8.463371e-76 | 0.5317816      | 0.32  | 0.039        | 1.508934e-71 | 18 |  |
| RAD51AP1     | DZ 2           |       |              |              |    |  |
| 1.126125e-75 | 0.5303426      | 0.925 | 0.599        | 2.007768e-71 | 18 |  |
| PSMB3        | DZ 2           |       |              |              |    |  |
| 1.255639e-75 | 0.6965836      | 0.775 | 0.323        | 2.238678e-71 | 18 |  |
| GRHPR        | DZ 2           |       |              |              |    |  |
| 1.263755e-75 | 0.5384676      | 0.953 | 0.693        | 2.253149e-71 | 18 |  |
| RHOA         | DZ 2           |       |              |              |    |  |
| 3.222606e-75 | 0.4130456      | 0.236 | 0.019        | 5.745585e-71 | 18 |  |
| C21orf58     | DZ 2           |       |              |              |    |  |
| 3.686388e-75 | 0.676724 0.672 | 0.243 | 6.572462e-71 | 18           |    |  |

|              |         |                |       |       |              |    |     |
|--------------|---------|----------------|-------|-------|--------------|----|-----|
| TIFA         | DZ 2    |                |       |       |              |    |     |
| 4.139185e-75 |         | -0.7318295     | 0.994 | 0.995 | 7.379752e-71 | 18 |     |
|              | RPL31   | DZ 2           |       |       |              |    |     |
| 5.027647e-75 |         | 0.6346864      | 0.376 | 0.068 | 8.963792e-71 | 18 |     |
|              | S1PR2   | DZ 2           |       |       |              |    |     |
| 8.663614e-75 |         | 0.556648 0.358 | 0.047 |       | 1.544636e-70 | 18 |     |
|              | APOLD1  | DZ 2           |       |       |              |    |     |
| 9.175596e-75 |         | 0.6391338      | 0.624 | 0.189 | 1.635917e-70 | 18 |     |
|              | UBE2E1  | DZ 2           |       |       |              |    |     |
| 9.794865e-75 |         | 0.7502184      | 0.709 | 0.282 | 1.746327e-70 | 18 |     |
|              | TUBA4A  | DZ 2           |       |       |              |    |     |
| 1.415085e-74 |         | 0.631532 0.447 | 0.089 |       | 2.522955e-70 | 18 |     |
|              | PXMP2   | DZ 2           |       |       |              |    |     |
| 2.071731e-74 |         | 0.744364 0.628 | 0.203 |       | 3.693689e-70 | 18 | ADA |
|              |         | DZ 2           |       |       |              |    |     |
| 3.728968e-74 |         | 0.4101277      | 0.229 | 0.024 | 6.648376e-70 | 18 |     |
|              | SLC03A1 | DZ 2           |       |       |              |    |     |
| 4.210669e-74 |         | 0.615297 0.742 | 0.303 |       | 7.507201e-70 | 18 |     |
|              | PNRC2   | DZ 2           |       |       |              |    |     |
| 4.672189e-74 |         | 0.6586348      | 0.596 | 0.19  | 8.330045e-70 | 18 |     |
|              | POLD4   | DZ 2           |       |       |              |    |     |
| 9.236658e-74 |         | 0.8415873      | 0.584 | 0.179 | 1.646804e-69 | 18 |     |
|              | RGS2    | DZ 2           |       |       |              |    |     |
| 1.500639e-73 |         | -0.5303258     | 0.999 | 0.999 | 2.675489e-69 | 18 |     |
|              | RPL10   | DZ 2           |       |       |              |    |     |
| 2.138076e-73 |         | 0.6468157      | 0.933 | 0.659 | 3.811976e-69 | 18 |     |
|              | DBI     | DZ 2           |       |       |              |    |     |
| 2.809524e-73 |         | 0.6086118      | 0.434 | 0.091 | 5.0091e-69   | 18 |     |
|              | RAD17   | DZ 2           |       |       |              |    |     |
| 2.866675e-73 |         | 0.526948 0.377 | 0.068 |       | 5.110994e-69 | 18 |     |
|              | LRR1    | DZ 2           |       |       |              |    |     |
| 2.962392e-73 |         | 0.6284653      | 0.734 | 0.309 | 5.281648e-69 | 18 |     |
|              | NDUFAF3 | DZ 2           |       |       |              |    |     |
| 4.049576e-73 |         | 0.7023769      | 0.614 | 0.203 | 7.21999e-69  | 18 |     |
|              | SYAP1   | DZ 2           |       |       |              |    |     |
| 5.213982e-73 |         | 0.5594796      | 0.876 | 0.478 | 9.296008e-69 | 18 |     |
|              | UBE2L3  | DZ 2           |       |       |              |    |     |
| 6.356866e-73 |         | 0.6821077      | 0.637 | 0.232 | 1.133366e-68 | 18 |     |
|              | ZBTB80S | DZ 2           |       |       |              |    |     |
| 7.569891e-73 |         | 0.613712 0.519 | 0.135 |       | 1.349636e-68 | 18 |     |
|              | ANAPC15 | DZ 2           |       |       |              |    |     |
| 7.962703e-73 |         | 0.6310257      | 0.468 | 0.111 | 1.41967e-68  | 18 |     |
|              | ABI3    | DZ 2           |       |       |              |    |     |
| 8.760887e-73 |         | 0.6436563      | 0.692 | 0.295 | 1.561979e-68 | 18 |     |
|              | AHSA1   | DZ 2           |       |       |              |    |     |
| 9.912606e-73 |         | 0.4310191      | 0.259 | 0.025 | 1.767319e-68 | 18 |     |
|              | BORA    | DZ 2           |       |       |              |    |     |
| 1.001755e-72 |         | 0.6016247      | 0.738 | 0.295 | 1.78603e-68  | 18 |     |
|              | HNRNPH3 | DZ 2           |       |       |              |    |     |
| 1.220901e-72 |         | 0.5792402      | 0.394 | 0.077 | 2.176745e-68 | 18 |     |

|              |            |       |       |              |              |    |
|--------------|------------|-------|-------|--------------|--------------|----|
| BPNT1        | DZ 2       |       |       |              |              |    |
| 1.518291e-72 | 0.594803   | 0.522 | 0.138 | 2.706962e-68 | 18           |    |
| FL0T1        | DZ 2       |       |       |              |              |    |
| 2.604306e-72 | 0.5893294  |       | 0.481 | 0.112        | 4.643217e-68 | 18 |
| CBFB         | DZ 2       |       |       |              |              |    |
| 5.468762e-72 | 0.6092142  |       | 0.763 | 0.343        | 9.750256e-68 | 18 |
| LSM14A       | DZ 2       |       |       |              |              |    |
| 6.83214e-72  | 0.5967148  |       | 0.723 | 0.292        | 1.218102e-67 | 18 |
| GTF2A2       | DZ 2       |       |       |              |              |    |
| 8.590449e-72 | 0.4824079  |       | 0.328 | 0.047        | 1.531591e-67 | 18 |
| ZWILCH       | DZ 2       |       |       |              |              |    |
| 1.091381e-71 | -0.6806848 |       | 0.996 | 0.999        | 1.945823e-67 | 18 |
| RPL39        | DZ 2       |       |       |              |              |    |
| 1.157659e-71 | 0.5439795  |       | 0.842 | 0.439        | 2.063991e-67 | 18 |
| YWHAQ        | DZ 2       |       |       |              |              |    |
| 1.328954e-71 | 0.5924126  |       | 0.819 | 0.408        | 2.369392e-67 | 18 |
| HDAC1        | DZ 2       |       |       |              |              |    |
| 1.352153e-71 | 0.5996296  |       | 0.601 | 0.187        | 2.410753e-67 | 18 |
| DCAF7        | DZ 2       |       |       |              |              |    |
| 2.964658e-71 | 0.6736175  |       | 0.657 | 0.232        | 5.285689e-67 | 18 |
| NCF4         | DZ 2       |       |       |              |              |    |
| 4.360748e-71 | 0.5236906  |       | 0.312 | 0.052        | 7.774778e-67 | 18 |
| BFSP2        | DZ 2       |       |       |              |              |    |
| 5.477116e-71 | 0.5596642  |       | 0.916 | 0.574        | 9.765151e-67 | 18 |
| LDHB         | DZ 2       |       |       |              |              |    |
| 6.187579e-71 | 0.415024   | 0.253 | 0.027 | 1.103183e-66 | 18           |    |
| TEDC1        | DZ 2       |       |       |              |              |    |
| 1.067657e-70 | 0.5009921  |       | 0.307 | 0.038        | 1.903525e-66 | 18 |
| IGF2BP3      | DZ 2       |       |       |              |              |    |
| 1.204881e-70 | 0.3270558  |       | 0.144 | 0.007        | 2.148182e-66 | 18 |
| ACKR4        | DZ 2       |       |       |              |              |    |
| 1.359997e-70 | 0.5630614  |       | 0.811 | 0.395        | 2.424738e-66 | 18 |
| UQCRFS1      | DZ 2       |       |       |              |              |    |
| 1.760302e-70 | 0.4960701  |       | 0.962 | 0.702        | 3.138442e-66 | 18 |
| COX7A2       | DZ 2       |       |       |              |              |    |
| 6.193289e-70 | 0.6304045  |       | 0.593 | 0.193        | 1.104201e-65 | 18 |
| RALBP1       | DZ 2       |       |       |              |              |    |
| 9.917091e-70 | 0.6725979  |       | 0.468 | 0.1          | 1.768118e-65 | 18 |
| HRK          | DZ 2       |       |       |              |              |    |
| 1.033319e-69 | 0.5370958  |       | 0.926 | 0.609        | 1.842304e-65 | 18 |
| ARPC5        | DZ 2       |       |       |              |              |    |
| 1.187557e-69 | 0.6532468  |       | 0.592 | 0.19         | 2.117295e-65 | 18 |
| IDH2         | DZ 2       |       |       |              |              |    |
| 1.413911e-69 | 0.4543708  |       | 0.952 | 0.648        | 2.520863e-65 | 18 |
| UBE2D3       | DZ 2       |       |       |              |              |    |
| 2.083336e-69 | 0.5390041  |       | 0.905 | 0.553        | 3.71438e-65  | 18 |
| ATP5PF       | DZ 2       |       |       |              |              |    |
| 2.588265e-69 | 0.562588   | 0.479 | 0.125 | 4.614618e-65 | 18           |    |
| G0T1         | DZ 2       |       |       |              |              |    |
| 3.64166e-69  | 0.5040438  |       | 0.934 | 0.64         | 6.492715e-65 | 18 |



|              |                |       |              |              |    |  |
|--------------|----------------|-------|--------------|--------------|----|--|
| HNRNPC       | DZ 2           |       |              |              |    |  |
| 3.656034e-69 | 0.543971 0.883 | 0.52  | 6.518342e-65 | 18           |    |  |
| VAMP8        | DZ 2           |       |              |              |    |  |
| 3.766205e-69 | 0.599879 0.453 | 0.097 | 6.714767e-65 | 18           |    |  |
| SEMA4A       | DZ 2           |       |              |              |    |  |
| 3.919484e-69 | 0.4824198      | 0.293 | 0.039        | 6.988048e-65 | 18 |  |
| CDT1         | DZ 2           |       |              |              |    |  |
| 4.148601e-69 | -1.272915      | 0.324 | 0.515        | 7.396541e-65 | 18 |  |
| BANK1        | DZ 2           |       |              |              |    |  |
| 4.281502e-69 | 0.341938 0.167 | 0.01  | 7.63349e-65  | 18           |    |  |
| SPA17        | DZ 2           |       |              |              |    |  |
| 8.425906e-69 | 0.6337268      | 0.584 | 0.181        | 1.502255e-64 | 18 |  |
| PRPSAP2      | DZ 2           |       |              |              |    |  |
| 1.009224e-68 | 0.5919391      | 0.506 | 0.131        | 1.799346e-64 | 18 |  |
| CLIC4        | DZ 2           |       |              |              |    |  |
| 1.230133e-68 | 0.6362609      | 0.571 | 0.161        | 2.193204e-64 | 18 |  |
| SEL1L3       | DZ 2           |       |              |              |    |  |
| 1.262453e-68 | 0.5711265      | 0.574 | 0.182        | 2.250828e-64 | 18 |  |
| RUVBL2       | DZ 2           |       |              |              |    |  |
| 3.386882e-68 | 0.5631331      | 0.728 | 0.301        | 6.038473e-64 | 18 |  |
| MMADHC       | DZ 2           |       |              |              |    |  |
| 3.428034e-68 | 0.6158693      | 0.62  | 0.227        | 6.111842e-64 | 18 |  |
| MRPL27       | DZ 2           |       |              |              |    |  |
| 3.770364e-68 | -0.7536554     | 0.975 | 0.986        | 6.722181e-64 | 18 |  |
| HLA-B        | DZ 2           |       |              |              |    |  |
| 6.65117e-68  | -1.083619      | 0.448 | 0.623        | 1.185837e-63 | 18 |  |
| SUB1         | DZ 2           |       |              |              |    |  |
| 6.84129e-68  | 0.6418154      | 0.536 | 0.161        | 1.219734e-63 | 18 |  |
| CCDC167      | DZ 2           |       |              |              |    |  |
| 7.328751e-68 | 0.6249795      | 0.745 | 0.332        | 1.306643e-63 | 18 |  |
| RBBP4        | DZ 2           |       |              |              |    |  |
| 7.396917e-68 | 0.5880991      | 0.62  | 0.215        | 1.318796e-63 | 18 |  |
| FXR1         | DZ 2           |       |              |              |    |  |
| 7.483363e-68 | 0.5093099      | 0.949 | 0.68         | 1.334209e-63 | 18 |  |
| COX6A1       | DZ 2           |       |              |              |    |  |
| 8.122378e-68 | 0.5466486      | 0.549 | 0.158        | 1.448139e-63 | 18 |  |
| SAE1         | DZ 2           |       |              |              |    |  |
| 8.483012e-68 | 0.4932376      | 0.333 | 0.052        | 1.512436e-63 | 18 |  |
| RNF26        | DZ 2           |       |              |              |    |  |
| 2.863394e-67 | 0.5223694      | 0.43  | 0.085        | 5.105145e-63 | 18 |  |
| FOPNL        | DZ 2           |       |              |              |    |  |
| 3.242241e-67 | 0.6275088      | 0.728 | 0.313        | 5.780592e-63 | 18 |  |
| AP3S1        | DZ 2           |       |              |              |    |  |
| 4.135871e-67 | 0.5087323      | 0.892 | 0.559        | 7.373844e-63 | 18 |  |
| SNRPB        | DZ 2           |       |              |              |    |  |
| 8.110896e-67 | 0.5296726      | 0.873 | 0.484        | 1.446092e-62 | 18 |  |
| SF3B6        | DZ 2           |       |              |              |    |  |
| 1.112196e-66 | -0.7515955     | 0.984 | 0.985        | 1.982934e-62 | 18 |  |
| RPL27        | DZ 2           |       |              |              |    |  |
| 1.313122e-66 | 0.4578808      | 0.972 | 0.802        | 2.341164e-62 | 18 |  |

|              |                   |                |       |              |              |    |
|--------------|-------------------|----------------|-------|--------------|--------------|----|
| 1.898915e-66 | HNRNPK<br>DZ 2    | -0.7524355     | 0.994 | 0.996        | 3.385575e-62 | 18 |
| 2.173362e-66 | RPL12<br>DZ 2     | -0.516874      | 0.999 | 1            | 3.874888e-62 | 18 |
| 2.40978e-66  | RPL21<br>DZ 2     | 0.533304 0.811 | 0.396 | 4.296396e-62 | 18           |    |
| 2.54594e-66  | BZW1<br>DZ 2      | 0.5519125      | 0.499 | 0.135        | 4.539156e-62 | 18 |
| 2.93095e-66  | RUVBL1<br>DZ 2    | 0.5361081      | 0.878 | 0.495        | 5.225591e-62 | 18 |
| 5.120041e-66 | RTRAF<br>DZ 2     | 0.5634952      | 0.635 | 0.229        | 9.128522e-62 | 18 |
| 9.582045e-66 | MAPRE1<br>DZ 2    | 0.5388153      | 0.725 | 0.309        | 1.708383e-61 | 18 |
| 1.710817e-65 | TCP1<br>DZ 2      | 0.5191427      | 0.312 | 0.04         | 3.050215e-61 | 18 |
| 2.246647e-65 | DZIP3<br>DZ 2     | 0.4529765      | 0.966 | 0.795        | 4.005547e-61 | 18 |
| 2.777583e-65 | SUM02<br>DZ 2     | -0.5858106     | 0.996 | 0.998        | 4.952152e-61 | 18 |
| 3.076952e-65 | RPS28<br>DZ 2     | 0.6416211      | 0.449 | 0.095        | 5.485898e-61 | 18 |
| 3.244976e-65 | CDKN2D<br>DZ 2    | 0.5701303      | 0.812 | 0.416        | 5.785468e-61 | 18 |
| 3.59765e-65  | GABARAPL2<br>DZ 2 | 0.4814815      | 0.955 | 0.703        | 6.414249e-61 | 18 |
| 6.400301e-65 | NDUFA4<br>DZ 2    | 0.5842196      | 0.455 | 0.111        | 1.141111e-60 | 18 |
| 8.018643e-65 | C12orf49<br>DZ 2  | 0.5337062      | 0.377 | 0.064        | 1.429644e-60 | 18 |
| 1.785554e-64 | SNTA1<br>DZ 2     | 0.5417983      | 0.589 | 0.183        | 3.183464e-60 | 18 |
| 2.910989e-64 | USP1<br>DZ 2      | -1.210534      | 0.421 | 0.579        | 5.190003e-60 | 18 |
| 5.012831e-64 | SARAF<br>DZ 2     | 0.5299829      | 0.389 | 0.076        | 8.937376e-60 | 18 |
| 6.419209e-64 | VGLL4<br>DZ 2     | 0.5717176      | 0.567 | 0.183        | 1.144481e-59 | 18 |
| 9.953261e-64 | NUDT21<br>DZ 2    | -1.279763      | 0.193 | 0.375        | 1.774567e-59 | 18 |
| 1.052376e-63 | SELL<br>DZ 2      | 0.52943 0.852  | 0.465 | 1.876281e-59 | 18           |    |
| 1.664965e-63 | NDUFB4<br>DZ 2    | 0.5675739      | 0.788 | 0.379        | 2.968466e-59 | 18 |
| 2.241967e-63 | NDUFB3<br>DZ 2    | 0.5374656      | 0.837 | 0.459        | 3.997204e-59 | 18 |
| 4.250112e-63 | PRDX6<br>DZ 2     | 0.4457721      | 0.253 | 0.027        | 7.577524e-59 | 18 |
| 4.487799e-63 | LM07<br>DZ 2      | 0.5762527      | 0.828 | 0.449        | 8.001297e-59 | 18 |

|              |                |                |       |              |              |     |
|--------------|----------------|----------------|-------|--------------|--------------|-----|
| 4.567269e-63 | CAPZA1 DZ 2    | 0.4930841      | 0.899 | 0.56         | 8.142983e-59 | 18  |
| 5.017031e-63 | RAC1 DZ 2      | 0.716205 0.583 | 0.23  | 8.944865e-59 | 18           |     |
| 5.940944e-63 | DSTN DZ 2      | 0.3814045      | 0.234 | 0.025        | 1.059211e-58 | 18  |
| 6.411989e-63 | LINC00877 DZ 2 | 0.5640246      | 0.772 | 0.374        | 1.143194e-58 | 18  |
| 6.876825e-63 | SRSF11 DZ 2    | 0.4778397      | 0.938 | 0.635        | 1.226069e-58 | 18  |
| 7.158861e-63 | ATP5MF DZ 2    | 0.4708624      | 0.323 | 0.053        | 1.276353e-58 | 18  |
| 7.403026e-63 | MBD2 DZ 2      | 0.5210763      | 0.636 | 0.241        | 1.319885e-58 | 18  |
| 7.842856e-63 | EXOSC8 DZ 2    | 0.5839155      | 0.719 | 0.301        | 1.398303e-58 | 18  |
| 9.903619e-63 | FKBP3 DZ 2     | 0.4724594      | 0.291 | 0.045        | 1.765716e-58 | 18  |
| 1.255178e-62 | RFC3 DZ 2      | 0.5388785      | 0.519 | 0.132        | 2.237857e-58 | 18  |
| 1.294153e-62 | GRK6 DZ 2      | 0.5536676      | 0.763 | 0.361        | 2.307345e-58 | 18  |
| 1.297152e-62 | CACYBP DZ 2    | 0.5715578      | 0.944 | 0.721        | 2.312693e-58 | 18  |
| 1.33137e-62  | LIMD2 DZ 2     | 0.5334547      | 0.802 | 0.405        | 2.373699e-58 | 18  |
| 1.486633e-62 | MOB1A DZ 2     | 0.5311734      | 0.829 | 0.431        | 2.650518e-58 | 18  |
| 2.162428e-62 | COTL1 DZ 2     | 0.5465096      | 0.745 | 0.342        | 3.855393e-58 | 18  |
| 4.576504e-62 | POLR2K DZ 2    | 0.5185847      | 0.764 | 0.359        | 8.159449e-58 | 18  |
| 4.829073e-62 | PSMA5 DZ 2     | 0.5595979      | 0.725 | 0.294        | 8.609753e-58 | 18  |
| 5.736948e-62 | CDK2AP2 DZ 2   | 0.4182312      | 0.232 | 0.023        | 1.02284e-57  | 18  |
| 7.24345e-62  | ALPK1 DZ 2     | -0.735602      | 0.99  | 0.991        | 1.291435e-57 | 18  |
| 1.24547e-61  | RPL30 DZ 2     | -0.6228787     | 1     | 0.999        | 2.220549e-57 | 18  |
| 1.272902e-61 | EEF1A1 DZ 2    | -0.6007738     | 0.997 | 0.998        | 2.269457e-57 | 18  |
| 1.323938e-61 | RPS14 DZ 2     | -0.5053393     | 0.999 | 0.999        | 2.360449e-57 | 18  |
| 1.330653e-61 | RPS18 DZ 2     | 0.5209547      | 0.781 | 0.346        | 2.372422e-57 | 18  |
| 1.395383e-61 | EIF1B DZ 2     | 0.50408 0.295  | 0.047 | 2.487828e-57 | 18           | CPM |
| 1.416198e-61 | DZ 2           | -1.171961      | 0.088 | 0.277        | 2.52494e-57  | 18  |

|              |                  |           |       |       |              |    |
|--------------|------------------|-----------|-------|-------|--------------|----|
| 1.538894e-61 | KLF2<br>DZ 2     | 0.5404478 | 0.506 | 0.139 | 2.743695e-57 | 18 |
| 1.659754e-61 | PTEN<br>DZ 2     | 0.5217054 | 0.345 | 0.066 | 2.959175e-57 | 18 |
| 1.769883e-61 | CCDC34<br>DZ 2   | 0.3967494 | 0.246 | 0.034 | 3.155524e-57 | 18 |
| 2.285494e-61 | KCNK12<br>DZ 2   | 0.4702195 | 0.369 | 0.077 | 4.074807e-57 | 18 |
| 2.678637e-61 | PDZD11<br>DZ 2   | 0.4322673 | 0.97  | 0.797 | 4.775742e-57 | 18 |
| 5.920209e-61 | LAPTM5<br>DZ 2   | 0.6013644 | 0.481 | 0.134 | 1.055514e-56 | 18 |
| 6.268616e-61 | AIM2<br>DZ 2     | 0.437237  | 0.981 | 0.9   | 1.117632e-56 | 18 |
| 1.481566e-60 | MYL6<br>DZ 2     | 0.4462908 | 0.355 | 0.062 | 2.641483e-56 | 18 |
| 1.550255e-60 | RHN01<br>DZ 2    | 0.5379688 | 0.64  | 0.243 | 2.76395e-56  | 18 |
| 1.579914e-60 | THOC2<br>DZ 2    | 0.5371728 | 0.584 | 0.216 | 2.816829e-56 | 18 |
| 1.584426e-60 | PSMD9<br>DZ 2    | 0.5255063 | 0.571 | 0.185 | 2.824873e-56 | 18 |
| 1.783929e-60 | HNRNPUL1<br>DZ 2 | 0.4584305 | 0.302 | 0.047 | 3.180568e-56 | 18 |
| 2.287242e-60 | ASB13<br>DZ 2    | 0.5593712 | 0.433 | 0.101 | 4.077924e-56 | 18 |
| 2.419579e-60 | TCF3<br>DZ 2     | 0.5642755 | 0.627 | 0.223 | 4.313867e-56 | 18 |
| 3.916931e-60 | OAZ2<br>DZ 2     | 0.5223293 | 0.358 | 0.07  | 6.983496e-56 | 18 |
| 5.197167e-60 | PAG1<br>DZ 2     | 0.5460675 | 0.455 | 0.119 | 9.26603e-56  | 18 |
| 8.548395e-60 | ARL3<br>DZ 2     | 0.3723509 | 0.237 | 0.028 | 1.524093e-55 | 18 |
| 1.035453e-59 | C9orf40<br>DZ 2  | 0.5125847 | 0.751 | 0.339 | 1.846109e-55 | 18 |
| 1.464583e-59 | UBE2A<br>DZ 2    | 0.5184948 | 0.547 | 0.167 | 2.611206e-55 | 18 |
| 1.761112e-59 | NUDT1<br>DZ 2    | 0.5598109 | 0.5   | 0.15  | 3.139887e-55 | 18 |
| 2.642284e-59 | ACTL6A<br>DZ 2   | 0.5583624 | 0.706 | 0.326 | 4.710928e-55 | 18 |
| 5.2759e-59   | EIF3A<br>DZ 2    | 0.4964061 | 0.75  | 0.359 | 9.406403e-55 | 18 |
| 5.621686e-59 | LRRFIP1<br>DZ 2  | 0.4960661 | 0.33  | 0.059 | 1.00229e-54  | 18 |
| 5.943408e-59 | PITPNC1<br>DZ 2  | 0.5316733 | 0.728 | 0.324 | 1.05965e-54  | 18 |
| 6.861342e-59 | RALY<br>DZ 2     | 0.5008508 | 0.382 | 0.084 | 1.223309e-54 | 18 |

|              |                |           |       |       |              |    |
|--------------|----------------|-----------|-------|-------|--------------|----|
| 9.694642e-59 | DESI2<br>DZ 2  | 0.5938538 | 0.62  | 0.227 | 1.728458e-54 | 18 |
| 1.476623e-58 | ZCCHC7<br>DZ 2 | 0.4828046 | 0.829 | 0.449 | 2.632671e-54 | 18 |
| 1.758205e-58 | PPP4C<br>DZ 2  | 0.4760006 | 0.381 | 0.077 | 3.134703e-54 | 18 |
| 2.178288e-58 | ODF2<br>DZ 2   | 0.5226662 | 0.797 | 0.411 | 3.88367e-54  | 18 |
| 2.644875e-58 | ELF1<br>DZ 2   | 0.4761671 | 0.929 | 0.675 | 4.715547e-54 | 18 |
| 3.129662e-58 | SRSF3<br>DZ 2  | -1.057195 | 0.424 | 0.609 | 5.579874e-54 | 18 |
| 5.231323e-58 | IGHD<br>DZ 2   | 0.517229  | 0.851 | 0.447 | 9.326926e-54 | 18 |
| 7.15207e-58  | PTPRC<br>DZ 2  | 0.5174551 | 0.576 | 0.19  | 1.275143e-53 | 18 |
| 7.245553e-58 | RNF5<br>DZ 2   | 0.5176574 | 0.53  | 0.171 | 1.29181e-53  | 18 |
| 7.500137e-58 | TIPRL<br>DZ 2  | 0.4564552 | 0.246 | 0.036 | 1.337199e-53 | 18 |
| 1.002098e-57 | SYBU<br>DZ 2   | 0.5487876 | 0.649 | 0.274 | 1.786641e-53 | 18 |
| 1.549922e-57 | BABAM1<br>DZ 2 | 0.4616549 | 0.282 | 0.046 | 2.763357e-53 | 18 |
| 1.673385e-57 | PEX5<br>DZ 2   | 0.4868149 | 0.439 | 0.099 | 2.983478e-53 | 18 |
| 2.042371e-57 | MGME1<br>DZ 2  | 0.4018664 | 0.238 | 0.03  | 3.641343e-53 | 18 |
| 3.441658e-57 | CTPS2<br>DZ 2  | 0.5615888 | 0.847 | 0.479 | 6.136131e-53 | 18 |
| 3.550029e-57 | GMFG<br>DZ 2   | 0.5324962 | 0.671 | 0.264 | 6.329347e-53 | 18 |
| 5.860682e-57 | SMS<br>DZ 2    | 0.6085195 | 0.347 | 0.072 | 1.044901e-52 | 18 |
| 5.969856e-57 | RGCC<br>DZ 2   | 0.5120296 | 0.807 | 0.414 | 1.064366e-52 | 18 |
| 8.608247e-57 | NDUFA2<br>DZ 2 | 0.493316  | 0.276 | 0.044 | 1.534764e-52 | 18 |
| 9.41672e-57  | LRRK1<br>DZ 2  | 0.4483032 | 0.269 | 0.041 | 1.678907e-52 | 18 |
| 1.069275e-56 | ASB2<br>DZ 2   | 0.4645318 | 0.894 | 0.589 | 1.90641e-52  | 18 |
| 1.109435e-56 | ST13<br>DZ 2   | 0.4302083 | 0.915 | 0.594 | 1.978012e-52 | 18 |
| 2.128318e-56 | PRDX1<br>DZ 2  | 0.5583654 | 0.758 | 0.354 | 3.794578e-52 | 18 |
| 2.525681e-56 | TPD52<br>DZ 2  | 0.4409691 | 0.298 | 0.044 | 4.503037e-52 | 18 |
| 3.96774e-56  | HYLS1<br>DZ 2  | -1.086858 | 0.733 | 0.794 | 7.074083e-52 | 18 |

|              |                    |                |       |              |              |    |
|--------------|--------------------|----------------|-------|--------------|--------------|----|
| 6.274274e-56 | HLA-E<br>DZ 2      | 0.4977939      | 0.417 | 0.102        | 1.11864e-51  | 18 |
| 7.089605e-56 | IMMP1L<br>DZ 2     | 0.4774038      | 0.391 | 0.079        | 1.264006e-51 | 18 |
| 7.812811e-56 | MIS18A<br>DZ 2     | 0.4761601      | 0.754 | 0.356        | 1.392946e-51 | 18 |
| 7.92209e-56  | ELOC<br>DZ 2       | 0.4200431      | 0.244 | 0.039        | 1.412429e-51 | 18 |
| 8.137143e-56 | ACY3<br>DZ 2       | 0.5496314      | 0.386 | 0.09         | 1.450771e-51 | 18 |
| 1.128808e-55 | RNGTT<br>DZ 2      | 0.5127354      | 0.635 | 0.242        | 2.012551e-51 | 18 |
| 1.237313e-55 | MRPL13<br>DZ 2     | 0.5091088      | 0.512 | 0.154        | 2.206006e-51 | 18 |
| 1.387081e-55 | TPGS2<br>DZ 2      | 0.5397422      | 0.421 | 0.107        | 2.473027e-51 | 18 |
| 1.745074e-55 | TRAC<br>DZ 2       | 0.4950279      | 0.451 | 0.12         | 3.111292e-51 | 18 |
| 1.96349e-55  | DNTTIP1<br>DZ 2    | -1.21051 0.158 | 0.356 | 3.500706e-51 | 18           |    |
| 3.104964e-55 | TXNIP<br>DZ 2      | -1.099714      | 0.123 | 0.3          | 5.53584e-51  | 18 |
| 3.714652e-55 | LINC00926<br>DZ 2  | 0.5178818      | 0.456 | 0.131        | 6.622852e-51 | 18 |
| 4.800935e-55 | OSBPL9<br>DZ 2     | 0.5096788      | 0.65  | 0.257        | 8.559588e-51 | 18 |
| 7.092399e-55 | MRPL18<br>DZ 2     | 0.4915883      | 0.759 | 0.347        | 1.264504e-50 | 18 |
| 7.79896e-55  | DGUOK<br>DZ 2      | 0.471008 0.889 | 0.524 | 1.390477e-50 | 18           |    |
| 8.858336e-55 | PAIP2<br>DZ 2      | 0.4897893      | 0.6   | 0.231        | 1.579353e-50 | 18 |
| 1.219755e-54 | STIP1<br>DZ 2      | 0.4599748      | 0.79  | 0.419        | 2.1747e-50   | 18 |
| 1.912602e-54 | BLOC1S1<br>DZ 2    | 0.5053238      | 0.341 | 0.039        | 3.409979e-50 | 18 |
| 1.933805e-54 | RRM2<br>DZ 2       | 0.4442598      | 0.933 | 0.664        | 3.447781e-50 | 18 |
| 2.173228e-54 | GDI2<br>DZ 2       | 0.3855286      | 0.168 | 0.016        | 3.874649e-50 | 18 |
| 2.308894e-54 | TUBB2B<br>DZ 2     | 0.5590627      | 0.613 | 0.227        | 4.116528e-50 | 18 |
| 2.535178e-54 | CPNE3<br>DZ 2      | 0.379929 0.209 | 0.022 | 4.519969e-50 | 18           |    |
| 2.728134e-54 | AC011447.3<br>DZ 2 | 0.4093655      | 0.301 | 0.05         | 4.863989e-50 | 18 |
| 3.010552e-54 | KCTD9<br>DZ 2      | 0.4982779      | 0.756 | 0.331        | 5.367513e-50 | 18 |
| 3.226557e-54 | STK17A<br>DZ 2     | 0.4382948      | 0.931 | 0.655        | 5.752628e-50 | 18 |

|              |                |       |              |              |    |  |
|--------------|----------------|-------|--------------|--------------|----|--|
| UBL5         | DZ 2           |       |              |              |    |  |
| 3.405447e-54 | 0.5201037      | 0.728 | 0.328        | 6.071572e-50 | 18 |  |
| DUT          | DZ 2           |       |              |              |    |  |
| 4.05166e-54  | 0.505608 0.687 | 0.295 | 7.223705e-50 | 18           |    |  |
| ARID4B       | DZ 2           |       |              |              |    |  |
| 4.621877e-54 | -0.9808251     | 0.049 | 0.214        | 8.240344e-50 | 18 |  |
| PLAC8        | DZ 2           |       |              |              |    |  |
| 5.491782e-54 | 0.5257594      | 0.681 | 0.305        | 9.791298e-50 | 18 |  |
| MZT2A        | DZ 2           |       |              |              |    |  |
| 7.437395e-54 | 0.5317134      | 0.473 | 0.136        | 1.326013e-49 | 18 |  |
| CUL3         | DZ 2           |       |              |              |    |  |
| 1.054066e-53 | 0.4813731      | 0.335 | 0.069        | 1.879295e-49 | 18 |  |
| DOK3         | DZ 2           |       |              |              |    |  |
| 1.116565e-53 | 0.4264248      | 0.329 | 0.068        | 1.990724e-49 | 18 |  |
| SEPHS1       | DZ 2           |       |              |              |    |  |
| 1.143326e-53 | 0.5034536      | 0.447 | 0.118        | 2.038436e-49 | 18 |  |
| SPATS2       | DZ 2           |       |              |              |    |  |
| 1.213216e-53 | 0.5626514      | 0.398 | 0.093        | 2.163043e-49 | 18 |  |
| MX1          | DZ 2           |       |              |              |    |  |
| 1.697038e-53 | -1.2082 0.335  | 0.497 | 3.025649e-49 | 18           |    |  |
| FXD5         | DZ 2           |       |              |              |    |  |
| 2.143515e-53 | 0.4719922      | 0.399 | 0.094        | 3.821673e-49 | 18 |  |
| PPP1R35      | DZ 2           |       |              |              |    |  |
| 2.300207e-53 | 0.476847 0.685 | 0.263 | 4.101039e-49 | 18           |    |  |
| SEPT9        | DZ 2           |       |              |              |    |  |
| 2.612312e-53 | -0.9997436     | 0.071 | 0.251        | 4.657492e-49 | 18 |  |
| TNFRSF13B    | DZ 2           |       |              |              |    |  |
| 2.977288e-53 | 0.3087328      | 0.197 | 0.019        | 5.308207e-49 | 18 |  |
| NCAPG2       | DZ 2           |       |              |              |    |  |
| 4.678966e-53 | 0.6387946      | 0.846 | 0.492        | 8.342128e-49 | 18 |  |
| SAT1         | DZ 2           |       |              |              |    |  |
| 5.773176e-53 | 0.4264209      | 0.297 | 0.048        | 1.0293e-48   | 18 |  |
| BRCA2        | DZ 2           |       |              |              |    |  |
| 8.663201e-53 | 0.4757863      | 0.714 | 0.306        | 1.544562e-48 | 18 |  |
| ZNF207       | DZ 2           |       |              |              |    |  |
| 1.976259e-52 | 0.4692854      | 0.797 | 0.387        | 3.523473e-48 | 18 |  |
| SYPL1        | DZ 2           |       |              |              |    |  |
| 2.224131e-52 | 0.3785735      | 0.276 | 0.044        | 3.965403e-48 | 18 |  |
| RANGAP1      | DZ 2           |       |              |              |    |  |
| 2.390085e-52 | -0.5483652     | 0.992 | 0.997        | 4.261282e-48 | 18 |  |
| RPL7         | DZ 2           |       |              |              |    |  |
| 3.013975e-52 | 0.5002364      | 0.6   | 0.213        | 5.373617e-48 | 18 |  |
| SNX5         | DZ 2           |       |              |              |    |  |
| 3.300407e-52 | 0.444871 0.345 | 0.07  | 5.884295e-48 | 18           |    |  |
| CUX1         | DZ 2           |       |              |              |    |  |
| 4.542525e-52 | 0.3523722      | 0.956 | 0.74         | 8.098867e-48 | 18 |  |
| CHCHD2       | DZ 2           |       |              |              |    |  |
| 4.860161e-52 | 0.4307111      | 0.892 | 0.526        | 8.665181e-48 | 18 |  |
| SNRPB2       | DZ 2           |       |              |              |    |  |
| 5.691966e-52 | -0.6440995     | 0.994 | 0.992        | 1.014821e-47 | 18 |  |

|              |                  |            |       |       |              |    |
|--------------|------------------|------------|-------|-------|--------------|----|
| 5.81972e-52  | RPL36<br>DZ 2    | 0.4929128  | 0.556 | 0.191 | 1.037598e-47 | 18 |
| 6.565751e-52 | ETFB<br>DZ 2     | 0.4834101  | 0.679 | 0.282 | 1.170608e-47 | 18 |
| 6.740294e-52 | RRAS2<br>DZ 2    | -0.589703  | 0.991 | 0.993 | 1.201727e-47 | 18 |
| 7.140508e-52 | RPS5<br>DZ 2     | 0.3591879  | 0.222 | 0.031 | 1.273081e-47 | 18 |
| 8.008748e-52 | KANK1<br>DZ 2    | 0.4835061  | 0.604 | 0.23  | 1.42788e-47  | 18 |
| 1.147815e-51 | TPRKB<br>DZ 2    | -0.4467649 | 0.999 | 0.999 | 2.04644e-47  | 18 |
| 1.240342e-51 | RPS2<br>DZ 2     | 0.498021   | 0.74  | 0.35  | 2.211405e-47 | 18 |
| 1.304068e-51 | RAB11A<br>DZ 2   | 0.4284449  | 0.256 | 0.038 | 2.325023e-47 | 18 |
| 2.047081e-51 | MCOLN2<br>DZ 2   | 0.4395111  | 0.824 | 0.446 | 3.649741e-47 | 18 |
| 2.35135e-51  | MAP1LC3B<br>DZ 2 | 0.5001276  | 0.639 | 0.253 | 4.192223e-47 | 18 |
| 3.493831e-51 | ILK<br>DZ 2      | 0.4764458  | 0.746 | 0.379 | 6.229152e-47 | 18 |
| 3.65972e-51  | SNRPC<br>DZ 2    | -1.065541  | 0.073 | 0.272 | 6.524915e-47 | 18 |
| 3.923434e-51 | GPR183<br>DZ 2   | -0.9638993 | 0.085 | 0.255 | 6.99509e-47  | 18 |
| 4.287678e-51 | FCMR<br>DZ 2     | 0.5128233  | 0.544 | 0.178 | 7.644501e-47 | 18 |
| 4.311786e-51 | OSBPL8<br>DZ 2   | 0.4405696  | 0.352 | 0.077 | 7.687483e-47 | 18 |
| 5.059314e-51 | LRWD1<br>DZ 2    | 0.4355882  | 0.925 | 0.627 | 9.020251e-47 | 18 |
| 5.280465e-51 | GSTP1<br>DZ 2    | 0.5096335  | 0.528 | 0.18  | 9.414542e-47 | 18 |
| 5.675082e-51 | COPS8<br>DZ 2    | 0.4636666  | 0.409 | 0.094 | 1.01181e-46  | 18 |
| 6.394367e-51 | RRM1<br>DZ 2     | 0.5376275  | 0.61  | 0.235 | 1.140052e-46 | 18 |
| 1.076552e-50 | NSRP1<br>DZ 2    | 0.4777669  | 0.494 | 0.149 | 1.919385e-46 | 18 |
| 1.339568e-50 | GNB1<br>DZ 2     | 0.4784365  | 0.613 | 0.254 | 2.388317e-46 | 18 |
| 1.920227e-50 | AK6<br>DZ 2      | -1.06057   | 0.202 | 0.35  | 3.423572e-46 | 18 |
| 2.170968e-50 | TRAF3IP3<br>DZ 2 | 0.4352977  | 0.869 | 0.51  | 3.870618e-46 | 18 |
| 2.413952e-50 | SMDT1<br>DZ 2    | 0.4435795  | 0.864 | 0.528 | 4.303835e-46 | 18 |
| 2.914251e-50 | SOD1<br>DZ 2     | 0.4646852  | 0.622 | 0.235 | 5.195818e-46 | 18 |



|              |            |       |       |              |              |    |
|--------------|------------|-------|-------|--------------|--------------|----|
| CEP57        | DZ 2       |       |       |              |              |    |
| 2.993473e-50 | 0.433365   | 0.632 | 0.231 | 5.337062e-46 | 18           |    |
| TSG101       | DZ 2       |       |       |              |              |    |
| 3.662214e-50 | 0.3974023  |       | 0.22  | 0.03         | 6.529361e-46 | 18 |
| RAPGEF5      | DZ 2       |       |       |              |              |    |
| 3.826977e-50 | 0.4853543  |       | 0.61  | 0.245        | 6.823118e-46 | 18 |
| MCTS1        | DZ 2       |       |       |              |              |    |
| 4.346419e-50 | 0.4448274  |       | 0.768 | 0.398        | 7.74923e-46  | 18 |
| PSMB2        | DZ 2       |       |       |              |              |    |
| 6.084475e-50 | 0.4907428  |       | 0.791 | 0.396        | 1.084801e-45 | 18 |
| MBD4         | DZ 2       |       |       |              |              |    |
| 6.409086e-50 | 0.4739368  |       | 0.342 | 0.074        | 1.142676e-45 | 18 |
| GMNN         | DZ 2       |       |       |              |              |    |
| 6.72109e-50  | 0.47028    | 0.536 | 0.18  | 1.198303e-45 | 18           |    |
| CLINT1       | DZ 2       |       |       |              |              |    |
| 7.032695e-50 | 0.4610872  |       | 0.532 | 0.173        | 1.253859e-45 | 18 |
| CBX1         | DZ 2       |       |       |              |              |    |
| 8.588332e-50 | 0.471743   | 0.62  | 0.25  | 1.531214e-45 | 18           |    |
| RBM42        | DZ 2       |       |       |              |              |    |
| 1.25428e-49  | 0.4030869  |       | 0.277 | 0.045        | 2.236256e-45 | 18 |
| PCBD2        | DZ 2       |       |       |              |              |    |
| 2.038845e-49 | 0.4482196  |       | 0.723 | 0.339        | 3.635057e-45 | 18 |
| DNAJB6       | DZ 2       |       |       |              |              |    |
| 2.232473e-49 | 0.4019773  |       | 0.896 | 0.573        | 3.980277e-45 | 18 |
| COPE         | DZ 2       |       |       |              |              |    |
| 2.297878e-49 | 0.4591812  |       | 0.746 | 0.373        | 4.096886e-45 | 18 |
| ANAPC11      | DZ 2       |       |       |              |              |    |
| 2.54273e-49  | 0.4872296  |       | 0.422 | 0.112        | 4.533433e-45 | 18 |
| BRWD1        | DZ 2       |       |       |              |              |    |
| 2.794334e-49 | 0.4577777  |       | 0.802 | 0.424        | 4.982018e-45 | 18 |
| CLTA         | DZ 2       |       |       |              |              |    |
| 3.143009e-49 | -0.8556301 |       | 0.917 | 0.917        | 5.603671e-45 | 18 |
| PFDN5        | DZ 2       |       |       |              |              |    |
| 4.958445e-49 | -0.6983882 |       | 0.982 | 0.983        | 8.840411e-45 | 18 |
| RPS21        | DZ 2       |       |       |              |              |    |
| 5.878067e-49 | 0.456551   | 0.705 | 0.319 | 1.048001e-44 | 18           |    |
| MRPS36       | DZ 2       |       |       |              |              |    |
| 8.063891e-49 | 0.4684076  |       | 0.834 | 0.463        | 1.437711e-44 | 18 |
| MTDH         | DZ 2       |       |       |              |              |    |
| 1.263542e-48 | 0.4519638  |       | 0.39  | 0.1          | 2.252769e-44 | 18 |
| ACSF3        | DZ 2       |       |       |              |              |    |
| 1.381347e-48 | 0.4539152  |       | 0.562 | 0.203        | 2.462804e-44 | 18 |
| CHORDC1      | DZ 2       |       |       |              |              |    |
| 2.409702e-48 | 0.4442403  |       | 0.347 | 0.076        | 4.296258e-44 | 18 |
| SNAPC1       | DZ 2       |       |       |              |              |    |
| 3.338787e-48 | 0.4190483  |       | 0.311 | 0.056        | 5.952724e-44 | 18 |
| XRCC4        | DZ 2       |       |       |              |              |    |
| 3.488994e-48 | 0.4859781  |       | 0.676 | 0.286        | 6.220528e-44 | 18 |
| HSPA4        | DZ 2       |       |       |              |              |    |
| 3.834494e-48 | 0.4087266  |       | 0.931 | 0.692        | 6.836519e-44 | 18 |

|              |              |            |       |       |              |    |
|--------------|--------------|------------|-------|-------|--------------|----|
| 3.958888e-48 | ATP5MPL DZ 2 | 0.4825666  | 0.398 | 0.084 | 7.058301e-44 | 18 |
| 4.463453e-48 | FAM111A DZ 2 | 0.4413028  | 0.834 | 0.471 | 7.95789e-44  | 18 |
| 5.670351e-48 | UBE2N DZ 2   | 0.4314498  | 0.867 | 0.517 | 1.010967e-43 | 18 |
| 7.979374e-48 | FKBP1A DZ 2  | 0.4104527  | 0.693 | 0.307 | 1.422643e-43 | 18 |
| 8.762121e-48 | EIF4E DZ 2   | 0.4707904  | 0.681 | 0.276 | 1.562199e-43 | 18 |
| 1.143067e-47 | MTPN DZ 2    | 0.4663332  | 0.411 | 0.108 | 2.037974e-43 | 18 |
| 3.004415e-47 | WDR34 DZ 2   | 0.4419416  | 0.37  | 0.087 | 5.356572e-43 | 18 |
| 4.736189e-47 | FUNDC1 DZ 2  | 0.6433588  | 0.277 | 0.059 | 8.444151e-43 | 18 |
| 5.019702e-47 | HOPX DZ 2    | 0.4477846  | 0.374 | 0.09  | 8.949626e-43 | 18 |
| 5.453501e-47 | FAM76B DZ 2  | 0.4671839  | 0.723 | 0.34  | 9.723046e-43 | 18 |
| 5.759167e-47 | RBM17 DZ 2   | 0.3514107  | 0.196 | 0.023 | 1.026802e-42 | 18 |
| 5.775352e-47 | IQCD DZ 2    | -0.5542331 | 0.995 | 0.995 | 1.029687e-42 | 18 |
| 6.566217e-47 | RPL37A DZ 2  | 0.4355347  | 0.598 | 0.229 | 1.170691e-42 | 18 |
| 8.31641e-47  | PIN1 DZ 2    | 0.5631776  | 0.57  | 0.235 | 1.482733e-42 | 18 |
| 1.351953e-46 | RGS1 DZ 2    | 0.4102801  | 0.284 | 0.053 | 2.410397e-42 | 18 |
| 1.421057e-46 | MDM2 DZ 2    | 0.3875722  | 0.918 | 0.632 | 2.533603e-42 | 18 |
| 1.447359e-46 | SET DZ 2     | 0.456289   | 0.588 | 0.239 | 2.580497e-42 | 18 |
| 1.536979e-46 | VDAC3 DZ 2   | 0.4113959  | 0.667 | 0.27  | 2.740281e-42 | 18 |
| 1.538699e-46 | CCNG1 DZ 2   | 0.360358   | 0.925 | 0.673 | 2.743346e-42 | 18 |
| 1.626032e-46 | MORF4L1 DZ 2 | 0.3731337  | 0.93  | 0.648 | 2.899052e-42 | 18 |
| 1.787786e-46 | ATP5F1A DZ 2 | 0.5247207  | 0.737 | 0.359 | 3.187444e-42 | 18 |
| 1.838553e-46 | SNAP23 DZ 2  | 0.4531627  | 0.587 | 0.218 | 3.277957e-42 | 18 |
| 2.952526e-46 | TXNDC9 DZ 2  | -0.928227  | 0.885 | 0.868 | 5.264059e-42 | 18 |
| 3.006105e-46 | CD52 DZ 2    | 0.3747313  | 0.902 | 0.595 | 5.359584e-42 | 18 |
| 3.059184e-46 | PSMA2 DZ 2   | 0.4918341  | 0.595 | 0.258 | 5.454219e-42 | 18 |

|              |                               |       |              |              |    |
|--------------|-------------------------------|-------|--------------|--------------|----|
| 3.16281e-46  | SYNCRIP DZ 2<br>0.5041586     | 0.491 | 0.141        | 5.638974e-42 | 18 |
| 3.460295e-46 | RBM38 DZ 2<br>0.3448027       | 0.177 | 0.023        | 6.16936e-42  | 18 |
| 3.761501e-46 | AC022167.3 DZ 2<br>0.4361705  | 0.398 | 0.101        | 6.70638e-42  | 18 |
| 4.313912e-46 | DNAJB1 DZ 2<br>0.4040864      | 0.913 | 0.617        | 7.691273e-42 | 18 |
| 4.638984e-46 | ARPC1B DZ 2<br>0.4534547      | 0.68  | 0.317        | 8.270845e-42 | 18 |
| 5.283375e-46 | MLF2 DZ 2<br>0.436355 0.474   | 0.141 | 9.419728e-42 | 18           |    |
| 5.618276e-46 | ANKRD13A DZ 2<br>0.4468092    | 0.523 | 0.175        | 1.001682e-41 | 18 |
| 5.750745e-46 | TADA3 DZ 2<br>0.3262578       | 0.183 | 0.022        | 1.0253e-41   | 18 |
| 6.019304e-46 | SPINK2 DZ 2<br>0.4729977      | 0.278 | 0.054        | 1.073182e-41 | 18 |
| 7.117301e-46 | RGS16 DZ 2<br>-0.489301       | 0.996 | 0.998        | 1.268944e-41 | 18 |
| 7.374016e-46 | RPL26 DZ 2<br>0.4681996       | 0.381 | 0.104        | 1.314713e-41 | 18 |
| 8.358684e-46 | PHF6 DZ 2<br>0.4128918        | 0.31  | 0.06         | 1.49027e-41  | 18 |
| 8.979527e-46 | USP7 DZ 2<br>0.443783 0.395   | 0.106 | 1.60096e-41  | 18           |    |
| 1.032826e-45 | CRIP1 DZ 2<br>0.4319563       | 0.434 | 0.118        | 1.841425e-41 | 18 |
| 1.070112e-45 | PRPSAP1 DZ 2<br>0.3581739     | 0.908 | 0.62         | 1.907903e-41 | 18 |
| 1.161589e-45 | HNRNPA0 DZ 2<br>0.4448519     | 0.729 | 0.323        | 2.070998e-41 | 18 |
| 1.391292e-45 | CCM2 DZ 2<br>0.4965426        | 0.563 | 0.202        | 2.480535e-41 | 18 |
| 1.495507e-45 | GLRX DZ 2<br>-0.4677759       | 0.999 | 0.999        | 2.666339e-41 | 18 |
| 1.758987e-45 | RPS8 DZ 2<br>0.3963212        | 0.848 | 0.517        | 3.136098e-41 | 18 |
| 1.783058e-45 | SELENOT DZ 2<br>0.4596046     | 0.553 | 0.189        | 3.179015e-41 | 18 |
| 1.893159e-45 | USP34 DZ 2<br>0.4263285       | 0.525 | 0.171        | 3.375314e-41 | 18 |
| 1.992038e-45 | RANGRF DZ 2<br>0.4663214      | 0.626 | 0.252        | 3.551605e-41 | 18 |
| 3.233728e-45 | ABI1 DZ 2<br>0.621277 0.339   | 0.08  | 5.765414e-41 | 18           |    |
| 3.935882e-45 | SH3TC1 DZ 2<br>-1.58825 0.122 | 0.29  | 7.017283e-41 | 18           |    |
| 4.80625e-45  | MIR155HG DZ 2<br>0.3974318    | 0.773 | 0.401        | 8.569062e-41 | 18 |

|              |               |       |              |              |    |  |
|--------------|---------------|-------|--------------|--------------|----|--|
| BANF1        | DZ 2          |       |              |              |    |  |
| 4.811057e-45 | -0.9109509    | 0.057 | 0.223        | 8.577633e-41 | 18 |  |
| GBP2         | DZ 2          |       |              |              |    |  |
| 5.493239e-45 | 0.57738 0.626 | 0.283 | 9.793897e-41 | 18           |    |  |
| RUBCNL       | DZ 2          |       |              |              |    |  |
| 7.368715e-45 | 0.3660169     | 0.24  | 0.035        | 1.313768e-40 | 18 |  |
| BRCA1        | DZ 2          |       |              |              |    |  |
| 7.578457e-45 | -0.6292589    | 0.982 | 0.982        | 1.351163e-40 | 18 |  |
| RPS11        | DZ 2          |       |              |              |    |  |
| 9.962671e-45 | 0.407095 0.81 | 0.429 | 1.776245e-40 | 18           |    |  |
| ROM01        | DZ 2          |       |              |              |    |  |
| 1.101148e-44 | 0.4611319     | 0.624 | 0.257        | 1.963237e-40 | 18 |  |
| HSPB11       | DZ 2          |       |              |              |    |  |
| 1.357764e-44 | 0.4910472     | 0.768 | 0.356        | 2.420757e-40 | 18 |  |
| RCS11        | DZ 2          |       |              |              |    |  |
| 1.584592e-44 | 0.3973606     | 0.755 | 0.384        | 2.825169e-40 | 18 |  |
| IK           | DZ 2          |       |              |              |    |  |
| 1.591251e-44 | 0.3111787     | 0.21  | 0.029        | 2.837041e-40 | 18 |  |
| XKR6         | DZ 2          |       |              |              |    |  |
| 1.68936e-44  | 0.4753116     | 0.517 | 0.196        | 3.01196e-40  | 18 |  |
| RELB         | DZ 2          |       |              |              |    |  |
| 1.742792e-44 | 0.4426901     | 0.703 | 0.323        | 3.107223e-40 | 18 |  |
| SLTM         | DZ 2          |       |              |              |    |  |
| 1.914231e-44 | -0.5055015    | 0.995 | 0.997        | 3.412883e-40 | 18 |  |
| RPS3A        | DZ 2          |       |              |              |    |  |
| 2.149574e-44 | 0.4519897     | 0.597 | 0.252        | 3.832476e-40 | 18 |  |
| CDV3         | DZ 2          |       |              |              |    |  |
| 2.371946e-44 | 0.4244928     | 0.374 | 0.095        | 4.228943e-40 | 18 |  |
| RMDN1        | DZ 2          |       |              |              |    |  |
| 2.6157e-44   | 0.4696491     | 0.512 | 0.169        | 4.663531e-40 | 18 |  |
| EHMT1        | DZ 2          |       |              |              |    |  |
| 2.645183e-44 | 0.3912803     | 0.351 | 0.086        | 4.716097e-40 | 18 |  |
| CSE1L        | DZ 2          |       |              |              |    |  |
| 3.005206e-44 | 0.4660122     | 0.541 | 0.215        | 5.357982e-40 | 18 |  |
| TAF9         | DZ 2          |       |              |              |    |  |
| 3.378407e-44 | 0.4070877     | 0.496 | 0.15         | 6.023363e-40 | 18 |  |
| CGGBP1       | DZ 2          |       |              |              |    |  |
| 3.704367e-44 | 0.3753095     | 0.907 | 0.622        | 6.604515e-40 | 18 |  |
| ATP5P0       | DZ 2          |       |              |              |    |  |
| 3.922369e-44 | 0.4028484     | 0.788 | 0.413        | 6.993192e-40 | 18 |  |
| FAM49B       | DZ 2          |       |              |              |    |  |
| 4.470982e-44 | 0.4166264     | 0.459 | 0.137        | 7.971314e-40 | 18 |  |
| DR1          | DZ 2          |       |              |              |    |  |
| 4.472364e-44 | 0.4646177     | 0.469 | 0.148        | 7.973778e-40 | 18 |  |
| RSRC1        | DZ 2          |       |              |              |    |  |
| 4.587397e-44 | 0.3990999     | 0.769 | 0.408        | 8.178871e-40 | 18 |  |
| HCLS1        | DZ 2          |       |              |              |    |  |
| 4.763136e-44 | 0.3352328     | 0.905 | 0.606        | 8.492196e-40 | 18 |  |
| PTGES3       | DZ 2          |       |              |              |    |  |
| 4.813745e-44 | 0.4874891     | 0.405 | 0.113        | 8.582425e-40 | 18 |  |

|              |            |       |       |              |              |    |
|--------------|------------|-------|-------|--------------|--------------|----|
| TBC1D1       | DZ 2       |       |       |              |              |    |
| 4.908388e-44 | 0.423165   | 0.835 | 0.475 | 8.751164e-40 | 18           |    |
| TRA2B        | DZ 2       |       |       |              |              |    |
| 4.997743e-44 | 0.4068593  |       | 0.333 | 0.079        | 8.910475e-40 | 18 |
| GSTZ1        | DZ 2       |       |       |              |              |    |
| 5.320017e-44 | 0.3741487  |       | 0.864 | 0.54         | 9.485059e-40 | 18 |
| UBE2D2       | DZ 2       |       |       |              |              |    |
| 5.539216e-44 | 0.3401745  |       | 0.271 | 0.042        | 9.875868e-40 | 18 |
| TRIOBP       | DZ 2       |       |       |              |              |    |
| 6.16854e-44  | 0.4841801  |       | 0.525 | 0.178        | 1.099789e-39 | 18 |
| APBB1IP      | DZ 2       |       |       |              |              |    |
| 6.804268e-44 | 0.3811895  |       | 0.732 | 0.366        | 1.213133e-39 | 18 |
| ARHGDIA      | DZ 2       |       |       |              |              |    |
| 6.958605e-44 | 0.3833508  |       | 0.821 | 0.472        | 1.24065e-39  | 18 |
| GRB2         | DZ 2       |       |       |              |              |    |
| 1.12014e-43  | 0.4616979  |       | 0.527 | 0.184        | 1.997097e-39 | 18 |
| RFC1         | DZ 2       |       |       |              |              |    |
| 1.220482e-43 | 0.4118672  |       | 0.754 | 0.395        | 2.175997e-39 | 18 |
| RPA3         | DZ 2       |       |       |              |              |    |
| 1.278493e-43 | 0.3347637  |       | 0.949 | 0.696        | 2.279424e-39 | 18 |
| ELOB         | DZ 2       |       |       |              |              |    |
| 1.373727e-43 | 0.4214717  |       | 0.626 | 0.251        | 2.449218e-39 | 18 |
| UPF3A        | DZ 2       |       |       |              |              |    |
| 1.802064e-43 | 0.3609457  |       | 0.207 | 0.027        | 3.2129e-39   | 18 |
| SGPP1        | DZ 2       |       |       |              |              |    |
| 2.024281e-43 | 0.4082997  |       | 0.473 | 0.146        | 3.60909e-39  | 18 |
| PBRM1        | DZ 2       |       |       |              |              |    |
| 2.038889e-43 | 0.4583006  |       | 0.63  | 0.259        | 3.635136e-39 | 18 |
| RBM6         | DZ 2       |       |       |              |              |    |
| 3.350783e-43 | 0.3968867  |       | 0.733 | 0.369        | 5.974111e-39 | 18 |
| NONO         | DZ 2       |       |       |              |              |    |
| 5.400302e-43 | 0.4618339  |       | 0.803 | 0.454        | 9.628199e-39 | 18 |
| SWAP70       | DZ 2       |       |       |              |              |    |
| 5.77242e-43  | 0.4082491  |       | 0.711 | 0.33         | 1.029165e-38 | 18 |
| PPM1G        | DZ 2       |       |       |              |              |    |
| 5.971421e-43 | -0.7507563 |       | 0.992 | 0.985        | 1.064645e-38 | 18 |
| TMSB10       | DZ 2       |       |       |              |              |    |
| 6.190492e-43 | 0.3971683  |       | 0.839 | 0.496        | 1.103703e-38 | 18 |
| GNG5         | DZ 2       |       |       |              |              |    |
| 6.346082e-43 | 0.4173312  |       | 0.663 | 0.301        | 1.131443e-38 | 18 |
| SHKBP1       | DZ 2       |       |       |              |              |    |
| 6.717098e-43 | 0.4123754  |       | 0.729 | 0.354        | 1.197591e-38 | 18 |
| TKT          | DZ 2       |       |       |              |              |    |
| 7.071866e-43 | 0.3675103  |       | 0.294 | 0.062        | 1.260843e-38 | 18 |
| NIF3L1       | DZ 2       |       |       |              |              |    |
| 7.8082e-43   | -1.244884  |       | 0.345 | 0.458        | 1.392124e-38 | 18 |
| JUNB         | DZ 2       |       |       |              |              |    |
| 9.918709e-43 | 0.4022734  |       | 0.719 | 0.339        | 1.768407e-38 | 18 |
| POLR2J       | DZ 2       |       |       |              |              |    |
| 1.67642e-42  | 0.4156912  |       | 0.609 | 0.25         | 2.988889e-38 | 18 |

|              |                    |            |       |       |              |    |
|--------------|--------------------|------------|-------|-------|--------------|----|
| 1.733151e-42 | GSPT1<br>DZ 2      | 0.4116103  | 0.341 | 0.089 | 3.090034e-38 | 18 |
| 1.802607e-42 | RTCA<br>DZ 2       | 0.3869501  | 0.315 | 0.066 | 3.213868e-38 | 18 |
| 2.056388e-42 | MTA3<br>DZ 2       | 0.3886964  | 0.788 | 0.424 | 3.666334e-38 | 18 |
| 2.106665e-42 | SLIRP<br>DZ 2      | 0.5167167  | 0.677 | 0.322 | 3.755973e-38 | 18 |
| 2.157215e-42 | HNRNPH1<br>DZ 2    | 0.3374887  | 0.881 | 0.553 | 3.8461e-38   | 18 |
| 3.476072e-42 | YWHAZ<br>DZ 2      | 0.4136511  | 0.698 | 0.33  | 6.19749e-38  | 18 |
| 3.641478e-42 | SEPHS2<br>DZ 2     | 0.3748666  | 0.793 | 0.438 | 6.492391e-38 | 18 |
| 4.14058e-42  | CCT7<br>DZ 2       | -0.9518498 | 0.131 | 0.281 | 7.382239e-38 | 18 |
| 4.323496e-42 | ADAM28<br>DZ 2     | -0.8778343 | 0.133 | 0.281 | 7.70836e-38  | 18 |
| 4.783903e-42 | IFITM2<br>DZ 2     | 0.3979715  | 0.642 | 0.276 | 8.52922e-38  | 18 |
| 4.884267e-42 | GGNBP2<br>DZ 2     | 0.4267906  | 0.6   | 0.238 | 8.708159e-38 | 18 |
| 5.150198e-42 | CCDC115<br>DZ 2    | 0.4346034  | 0.364 | 0.092 | 9.182288e-38 | 18 |
| 5.255336e-42 | TOP2B<br>DZ 2      | 0.3219953  | 0.219 | 0.029 | 9.369738e-38 | 18 |
| 5.686699e-42 | ZNF714<br>DZ 2     | 0.3977883  | 0.694 | 0.337 | 1.013882e-37 | 18 |
| 6.116281e-42 | MRPS18C<br>DZ 2    | 0.3729837  | 0.321 | 0.077 | 1.090472e-37 | 18 |
| 6.210328e-42 | GPR160<br>DZ 2     | 0.3981109  | 0.358 | 0.088 | 1.107239e-37 | 18 |
| 7.322966e-42 | FAM208B<br>DZ 2    | 0.3336729  | 0.241 | 0.04  | 1.305612e-37 | 18 |
| 7.598614e-42 | AL441992.1<br>DZ 2 | 0.5034848  | 0.505 | 0.175 | 1.354757e-37 | 18 |
| 1.138069e-41 | LCK<br>DZ 2        | 0.4027112  | 0.304 | 0.059 | 2.029063e-37 | 18 |
| 1.1649e-41   | ZNF608<br>DZ 2     | 0.431742   | 0.544 | 0.202 | 2.0769e-37   | 18 |
| 1.260064e-41 | PRPF38A<br>DZ 2    | 0.3882912  | 0.725 | 0.369 | 2.246569e-37 | 18 |
| 1.289337e-41 | PSMC1<br>DZ 2      | 0.4159811  | 0.291 | 0.058 | 2.298758e-37 | 18 |
| 1.37349e-41  | FANCA<br>DZ 2      | 0.3976869  | 0.697 | 0.316 | 2.448795e-37 | 18 |
| 1.61064e-41  | GNB2<br>DZ 2       | 0.4138277  | 0.589 | 0.234 | 2.87161e-37  | 18 |
| 1.95779e-41  | SRSF1<br>DZ 2      | 0.4359719  | 0.578 | 0.213 | 3.490543e-37 | 18 |

|              |                |       |              |              |     |  |
|--------------|----------------|-------|--------------|--------------|-----|--|
| LY86         | DZ 2           |       |              |              |     |  |
| 2.171036e-41 | 0.4477461      | 0.675 | 0.293        | 3.87074e-37  | 18  |  |
| ITSN2        | DZ 2           |       |              |              |     |  |
| 2.540937e-41 | 0.4553188      | 0.793 | 0.433        | 4.530236e-37 | 18  |  |
| RHOH         | DZ 2           |       |              |              |     |  |
| 2.663013e-41 | 0.3181302      | 0.927 | 0.679        | 4.747885e-37 | 18  |  |
| SLC25A3      | DZ 2           |       |              |              |     |  |
| 2.931749e-41 | 0.4147081      | 0.378 | 0.106        | 5.227014e-37 | 18  |  |
| NFYB         | DZ 2           |       |              |              |     |  |
| 3.068089e-41 | 0.3675459      | 0.834 | 0.492        | 5.470095e-37 | 18  |  |
| COX5A        | DZ 2           |       |              |              |     |  |
| 3.780014e-41 | 0.4233271      | 0.398 | 0.099        | 6.739386e-37 | 18  |  |
| LNPEP        | DZ 2           |       |              |              |     |  |
| 5.081686e-41 | 0.409883 0.614 | 0.276 | 9.060138e-37 | 18           |     |  |
| PSMD14       | DZ 2           |       |              |              |     |  |
| 5.692658e-41 | 0.3810615      | 0.738 | 0.374        | 1.014944e-36 | 18  |  |
| POLR2G       | DZ 2           |       |              |              |     |  |
| 6.209588e-41 | 0.3693216      | 0.304 | 0.057        | 1.107107e-36 | 18  |  |
| DLEU2        | DZ 2           |       |              |              |     |  |
| 7.319581e-41 | 0.3878658      | 0.873 | 0.549        | 1.305008e-36 | 18  |  |
| SEC61G       | DZ 2           |       |              |              |     |  |
| 7.474071e-41 | 0.3817517      | 0.75  | 0.411        | 1.332552e-36 | 18  |  |
| IDI1         | DZ 2           |       |              |              |     |  |
| 7.641279e-41 | -0.4239952     | 0.997 | 0.998        | 1.362364e-36 | 18  |  |
| RPS15        | DZ 2           |       |              |              |     |  |
| 8.557311e-41 | -0.5627043     | 0.995 | 0.992        | 1.525683e-36 | 18  |  |
| RPL37        | DZ 2           |       |              |              |     |  |
| 9.626709e-41 | 0.3560901      | 0.744 | 0.381        | 1.716346e-36 | 18  |  |
| EIF4H        | DZ 2           |       |              |              |     |  |
| 1.404579e-40 | 0.4281935      | 0.365 | 0.095        | 2.504224e-36 | 18  |  |
| TACC1        | DZ 2           |       |              |              |     |  |
| 1.697491e-40 | -1.122987      | 0.171 | 0.318        | 3.026458e-36 | 18  |  |
| CD69         | DZ 2           |       |              |              |     |  |
| 1.834083e-40 | 0.4833617      | 0.584 | 0.247        | 3.269987e-36 | 18  |  |
| RGS10        | DZ 2           |       |              |              |     |  |
| 2.093317e-40 | 0.4574372      | 0.608 | 0.258        | 3.732175e-36 | 18  |  |
| CD22         | DZ 2           |       |              |              |     |  |
| 2.73903e-40  | 0.33662 0.22   | 0.036 | 4.883417e-36 | 18           | TOX |  |
| DZ 2         |                |       |              |              |     |  |
| 3.413575e-40 | 0.3376851      | 0.88  | 0.579        | 6.086062e-36 | 18  |  |
| SAP18        | DZ 2           |       |              |              |     |  |
| 5.179893e-40 | 0.4501797      | 0.459 | 0.152        | 9.23523e-36  | 18  |  |
| SMIM20       | DZ 2           |       |              |              |     |  |
| 5.227082e-40 | 0.3087592      | 0.973 | 0.804        | 9.319364e-36 | 18  |  |
| TMA7         | DZ 2           |       |              |              |     |  |
| 8.573373e-40 | 0.3391433      | 0.834 | 0.484        | 1.528547e-35 | 18  |  |
| CCT8         | DZ 2           |       |              |              |     |  |
| 8.681357e-40 | 0.3840195      | 0.734 | 0.371        | 1.547799e-35 | 18  |  |
| ZFAND6       | DZ 2           |       |              |              |     |  |
| 1.135281e-39 | 0.4099127      | 0.495 | 0.17         | 2.024092e-35 | 18  |  |

|              |            |       |       |              |    |     |
|--------------|------------|-------|-------|--------------|----|-----|
| EIF4E2       | DZ 2       |       |       |              |    |     |
| 1.381409e-39 | 0.4103703  | 0.609 | 0.257 | 2.462914e-35 | 18 |     |
| THOC7        | DZ 2       |       |       |              |    |     |
| 1.413921e-39 | 0.3665678  | 0.333 | 0.075 | 2.52088e-35  | 18 |     |
| SUGP2        | DZ 2       |       |       |              |    |     |
| 1.508505e-39 | 0.4216314  | 0.82  | 0.478 | 2.689513e-35 | 18 |     |
| NDUFB1       | DZ 2       |       |       |              |    |     |
| 1.522934e-39 | 0.3603333  | 0.589 | 0.264 | 2.715238e-35 | 18 |     |
| TIMM10       | DZ 2       |       |       |              |    |     |
| 1.717917e-39 | 0.3881929  | 0.723 | 0.347 | 3.062875e-35 | 18 |     |
| DBNL         | DZ 2       |       |       |              |    |     |
| 2.156807e-39 | -0.4759034 | 0.999 | 0.998 | 3.845371e-35 | 18 |     |
| RPL23A       | DZ 2       |       |       |              |    |     |
| 2.203087e-39 | 0.4100879  | 0.596 | 0.234 | 3.927884e-35 | 18 |     |
| MCUB         | DZ 2       |       |       |              |    |     |
| 2.708278e-39 | 0.3550884  | 0.903 | 0.609 | 4.828589e-35 | 18 |     |
| UQCR10       | DZ 2       |       |       |              |    |     |
| 3.246229e-39 | 0.4166879  | 0.609 | 0.269 | 5.787702e-35 | 18 |     |
| SEPT2        | DZ 2       |       |       |              |    |     |
| 3.822085e-39 | 0.4151777  | 0.557 | 0.204 | 6.814395e-35 | 18 |     |
| EHD1         | DZ 2       |       |       |              |    |     |
| 4.021319e-39 | 0.4245605  | 0.631 | 0.265 | 7.169609e-35 | 18 |     |
| TXNL4A       | DZ 2       |       |       |              |    |     |
| 4.146025e-39 | 0.3551566  | 0.746 | 0.376 | 7.391948e-35 | 18 |     |
| SRSF10       | DZ 2       |       |       |              |    |     |
| 5.539834e-39 | 0.3332637  | 0.236 | 0.042 | 9.87697e-35  | 18 |     |
| H2AFJ        | DZ 2       |       |       |              |    |     |
| 8.606655e-39 | 0.3948809  | 0.383 | 0.109 | 1.53448e-34  | 18 |     |
| NIN          | DZ 2       |       |       |              |    |     |
| 8.64438e-39  | 0.3525422  | 0.633 | 0.273 | 1.541206e-34 | 18 |     |
| VBP1         | DZ 2       |       |       |              |    |     |
| 1.239687e-38 | 0.3194539  | 0.271 | 0.052 | 2.210238e-34 | 18 |     |
| GEMIN2       | DZ 2       |       |       |              |    |     |
| 1.354995e-38 | 0.408459   | 0.487 | 0.167 | 2.41582e-34  | 18 |     |
| CTCF         | DZ 2       |       |       |              |    |     |
| 1.51895e-38  | 0.412083   | 0.501 | 0.176 | 2.708135e-34 | 18 | TDG |
|              | DZ 2       |       |       |              |    |     |
| 1.793752e-38 | 0.3346085  | 0.839 | 0.51  | 3.19808e-34  | 18 |     |
| CAPZB        | DZ 2       |       |       |              |    |     |
| 1.825576e-38 | 0.4064638  | 0.584 | 0.238 | 3.254819e-34 | 18 |     |
| ETFA         | DZ 2       |       |       |              |    |     |
| 2.383522e-38 | 0.3823132  | 0.25  | 0.05  | 4.249582e-34 | 18 |     |
| A4GALT       | DZ 2       |       |       |              |    |     |
| 2.77046e-38  | 0.3904448  | 0.437 | 0.129 | 4.939454e-34 | 18 |     |
| MAP4K1       | DZ 2       |       |       |              |    |     |
| 3.028128e-38 | 0.3350392  | 0.337 | 0.088 | 5.39885e-34  | 18 |     |
| TUBG1        | DZ 2       |       |       |              |    |     |
| 3.22721e-38  | 0.358902   | 0.684 | 0.308 | 5.753792e-34 | 18 |     |
| LARP7        | DZ 2       |       |       |              |    |     |
| 3.447101e-38 | -0.4434728 | 0.995 | 0.997 | 6.145836e-34 | 18 |     |



|              |                      |            |       |       |              |    |
|--------------|----------------------|------------|-------|-------|--------------|----|
| 4.652765e-38 | RPL27A<br>DZ 2       | 0.3739029  | 0.671 | 0.31  | 8.295414e-34 | 18 |
| 5.704089e-38 | WDR1<br>DZ 2         | 0.4033696  | 0.561 | 0.223 | 1.016982e-33 | 18 |
| 6.376447e-38 | HDDC2<br>DZ 2        | 0.3637086  | 0.237 | 0.043 | 1.136857e-33 | 18 |
| 6.574828e-38 | LINC00467<br>DZ 2    | 0.3939918  | 0.461 | 0.147 | 1.172226e-33 | 18 |
| 6.879301e-38 | UBA1<br>DZ 2         | 0.3364903  | 0.26  | 0.052 | 1.226511e-33 | 18 |
| 7.08204e-38  | FZR1<br>DZ 2         | 0.3461272  | 0.242 | 0.051 | 1.262657e-33 | 18 |
| 7.99612e-38  | BORCS8-MEF2B<br>DZ 2 | 0.3994763  | 0.567 | 0.227 | 1.425628e-33 | 18 |
| 1.363675e-37 | CHCHD7<br>DZ 2       | 0.3998961  | 0.58  | 0.241 | 2.431297e-33 | 18 |
| 1.396999e-37 | SNRPA1<br>DZ 2       | 0.3143043  | 0.859 | 0.564 | 2.49071e-33  | 18 |
| 1.414143e-37 | PCBP2<br>DZ 2        | 0.3609927  | 0.604 | 0.249 | 2.521276e-33 | 18 |
| 1.447504e-37 | CYB5B<br>DZ 2        | 0.3631802  | 0.561 | 0.209 | 2.580755e-33 | 18 |
| 1.767162e-37 | PIH1D1<br>DZ 2       | -0.8021369 | 0.146 | 0.281 | 3.150674e-33 | 18 |
| 1.927967e-37 | RNASET2<br>DZ 2      | 0.3903484  | 0.598 | 0.261 | 3.437373e-33 | 18 |
| 2.282184e-37 | PPP1R7<br>DZ 2       | 0.3766468  | 0.65  | 0.289 | 4.068906e-33 | 18 |
| 2.398953e-37 | LYPLA1<br>DZ 2       | 0.3191209  | 0.206 | 0.037 | 4.277093e-33 | 18 |
| 2.503824e-37 | EEPD1<br>DZ 2        | 0.3815781  | 0.527 | 0.199 | 4.464067e-33 | 18 |
| 3.113099e-37 | UBE2K<br>DZ 2        | 0.3961224  | 0.447 | 0.153 | 5.550345e-33 | 18 |
| 3.405288e-37 | SMC1A<br>DZ 2        | 0.3612308  | 0.725 | 0.363 | 6.071287e-33 | 18 |
| 4.007301e-37 | FAM96B<br>DZ 2       | -0.9538726 | 0.382 | 0.468 | 7.144618e-33 | 18 |
| 4.206197e-37 | ITM2B<br>DZ 2        | 0.3812358  | 0.72  | 0.351 | 7.499229e-33 | 18 |
| 4.250562e-37 | GNAS<br>DZ 2         | 0.3334707  | 0.882 | 0.594 | 7.578327e-33 | 18 |
| 4.472117e-37 | CALM1<br>DZ 2        | 0.3314025  | 0.845 | 0.53  | 7.973337e-33 | 18 |
| 4.632925e-37 | CAP1<br>DZ 2         | 0.3545142  | 0.589 | 0.234 | 8.260043e-33 | 18 |
| 5.014047e-37 | CPSF6<br>DZ 2        | 0.3727452  | 0.395 | 0.118 | 8.939545e-33 | 18 |
| 5.593645e-37 | CCNH<br>DZ 2         | 0.3100946  | 0.801 | 0.455 | 9.972909e-33 | 18 |

|              |                  |            |       |              |              |    |
|--------------|------------------|------------|-------|--------------|--------------|----|
| 5.691945e-37 | HSPD1<br>DZ 2    | 0.3969271  | 0.495 | 0.187        | 1.014817e-32 | 18 |
| 6.036037e-37 | FYTDD1<br>DZ 2   | 0.4370703  | 0.422 | 0.137        | 1.076165e-32 | 18 |
| 7.263136e-37 | IN080C<br>DZ 2   | -0.5185841 | 0.994 | 0.992        | 1.294945e-32 | 18 |
| 7.543236e-37 | RPL18<br>DZ 2    | 0.3704013  | 0.425 | 0.143        | 1.344884e-32 | 18 |
| 9.084662e-37 | UBQLN1<br>DZ 2   | 0.3627681  | 0.631 | 0.282        | 1.619704e-32 | 18 |
| 1.126776e-36 | WTAP<br>DZ 2     | 0.3277648  | 0.663 | 0.299        | 2.008928e-32 | 18 |
| 1.193233e-36 | ELAVL1<br>DZ 2   | -0.5455626 | 0.996 | 0.993        | 2.127415e-32 | 18 |
| 1.22183e-36  | RPL35<br>DZ 2    | -0.6731614 | 0.969 | 0.965        | 2.1784e-32   | 18 |
| 1.423317e-36 | RPL38<br>DZ 2    | 0.4076884  | 0.674 | 0.316        | 2.537632e-32 | 18 |
| 1.790749e-36 | RNASEH2C<br>DZ 2 | 0.323979   | 0.359 | 3.192726e-32 | 18           | 18 |
| 1.851732e-36 | PCMT1<br>DZ 2    | -1.005893  | 0.604 | 0.649        | 3.301453e-32 | 18 |
| 2.114502e-36 | ZFP36L1<br>DZ 2  | 0.3919089  | 0.372 | 0.105        | 3.769946e-32 | 18 |
| 2.159985e-36 | MAP4K2<br>DZ 2   | 0.3295458  | 0.82  | 0.487        | 3.851037e-32 | 18 |
| 2.227507e-36 | THRAP3<br>DZ 2   | 0.3377892  | 0.729 | 0.359        | 3.971423e-32 | 18 |
| 2.235711e-36 | HADHA<br>DZ 2    | 0.3994871  | 0.556 | 0.233        | 3.986049e-32 | 18 |
| 2.776806e-36 | HNRNPAB<br>DZ 2  | 0.3525668  | 0.762 | 0.41         | 4.950767e-32 | 18 |
| 3.090784e-36 | ESD<br>DZ 2      | 0.3422562  | 0.672 | 0.309        | 5.51056e-32  | 18 |
| 3.929071e-36 | STRBP<br>DZ 2    | 0.3222725  | 0.812 | 0.484        | 7.005141e-32 | 18 |
| 5.300246e-36 | CCT3<br>DZ 2     | -0.9320813 | 0.246 | 0.382        | 9.449809e-32 | 18 |
| 5.682357e-36 | PDCD4<br>DZ 2    | 0.3511066  | 0.398 | 0.112        | 1.013107e-31 | 18 |
| 6.04438e-36  | HAGH<br>DZ 2     | 0.3589152  | 0.6   | 0.261        | 1.077653e-31 | 18 |
| 6.135394e-36 | PMF1<br>DZ 2     | 0.3952739  | 0.561 | 0.225        | 1.093879e-31 | 18 |
| 6.277389e-36 | SEPT1<br>DZ 2    | 0.3041984  | 0.902 | 0.653        | 1.119196e-31 | 18 |
| 7.183776e-36 | RBX1<br>DZ 2     | 0.3715809  | 0.269 | 0.057        | 1.280795e-31 | 18 |
| 7.297601e-36 | TESC<br>DZ 2     | 0.3750867  | 0.626 | 0.272        | 1.301089e-31 | 18 |

|              |                  |            |       |       |              |    |
|--------------|------------------|------------|-------|-------|--------------|----|
| 7.70007e-36  | CNIH1<br>DZ 2    | 0.3915468  | 0.465 | 0.164 | 1.372845e-31 | 18 |
| 8.241833e-36 | CYB5R3<br>DZ 2   | -0.4016368 | 0.997 | 0.998 | 1.469436e-31 | 18 |
| 9.093974e-36 | RPL19<br>DZ 2    | 0.3823362  | 0.338 | 0.084 | 1.621365e-31 | 18 |
| 1.008933e-35 | MAP4K4<br>DZ 2   | 0.3537023  | 0.413 | 0.132 | 1.798826e-31 | 18 |
| 1.019797e-35 | APIP<br>DZ 2     | 0.3595674  | 0.665 | 0.304 | 1.818197e-31 | 18 |
| 1.102605e-35 | SCP2<br>DZ 2     | 0.3827572  | 0.425 | 0.13  | 1.965834e-31 | 18 |
| 1.175279e-35 | MPST<br>DZ 2     | 0.4012455  | 0.468 | 0.157 | 2.095405e-31 | 18 |
| 1.325933e-35 | LYPLAL1<br>DZ 2  | -0.8134357 | 0.036 | 0.174 | 2.364005e-31 | 18 |
| 1.335966e-35 | TNFRSF18<br>DZ 2 | 0.31416    | 0.878 | 0.561 | 2.381894e-31 | 18 |
| 1.674385e-35 | UQCRQ<br>DZ 2    | 0.3784501  | 0.61  | 0.262 | 2.985261e-31 | 18 |
| 1.680812e-35 | TXNDC17<br>DZ 2  | 0.3169963  | 0.819 | 0.488 | 2.99672e-31  | 18 |
| 2.061143e-35 | ARF1<br>DZ 2     | 0.3768143  | 0.725 | 0.386 | 3.674811e-31 | 18 |
| 2.115131e-35 | SSB<br>DZ 2      | 0.3479856  | 0.67  | 0.315 | 3.771067e-31 | 18 |
| 2.163676e-35 | PRKAR1A<br>DZ 2  | 0.3746002  | 0.326 | 0.077 | 3.857618e-31 | 18 |
| 2.173898e-35 | SLC35E3<br>DZ 2  | 0.3665913  | 0.469 | 0.166 | 3.875843e-31 | 18 |
| 2.916861e-35 | COMMD7<br>DZ 2   | 0.3558658  | 0.479 | 0.168 | 5.200471e-31 | 18 |
| 2.978413e-35 | AKIRIN2<br>DZ 2  | 0.33315    | 0.6   | 0.251 | 5.310212e-31 | 18 |
| 3.563855e-35 | EML6<br>DZ 2     | 0.4149473  | 0.223 | 0.042 | 6.353997e-31 | 18 |
| 3.925169e-35 | MOB3A<br>DZ 2    | 0.3594478  | 0.391 | 0.106 | 6.998184e-31 | 18 |
| 4.167964e-35 | SH3BGRL3<br>DZ 2 | -0.8795482 | 0.872 | 0.854 | 7.431062e-31 | 18 |
| 4.281343e-35 | PSMD8<br>DZ 2    | 0.3136968  | 0.83  | 0.504 | 7.633207e-31 | 18 |
| 5.372972e-35 | PTRHD1<br>DZ 2   | 0.3963401  | 0.574 | 0.234 | 9.579471e-31 | 18 |
| 5.688441e-35 | HLTF<br>DZ 2     | 0.3336457  | 0.244 | 0.05  | 1.014192e-30 | 18 |
| 6.058153e-35 | RPS17<br>DZ 2    | -0.6871961 | 0.978 | 0.968 | 1.080108e-30 | 18 |
| 6.521913e-35 |                  | 0.3841931  | 0.553 | 0.222 | 1.162792e-30 | 18 |

|              |               |                |       |              |              |    |
|--------------|---------------|----------------|-------|--------------|--------------|----|
| 6.563116e-35 | IAH1 DZ 2     | 0.5023589      | 0.396 | 0.104        | 1.170138e-30 | 18 |
| 8.555689e-35 | VPREB3 DZ 2   | 0.3730684      | 0.516 | 0.199        | 1.525394e-30 | 18 |
| 9.368717e-35 | MTMR14 DZ 2   | 0.365414 0.449 | 0.151 | 1.670348e-30 | 18           |    |
| 9.614277e-35 | MFAP1 DZ 2    | 0.3173613      | 0.771 | 0.435        | 1.71413e-30  | 18 |
| 1.046578e-34 | AURKAIP1 DZ 2 | 0.3726075      | 0.348 | 0.087        | 1.865943e-30 | 18 |
| 1.243328e-34 | CEP135 DZ 2   | 0.3383559      | 0.574 | 0.229        | 2.216729e-30 | 18 |
| 1.288499e-34 | KRAS DZ 2     | 0.4369789      | 0.495 | 0.171        | 2.297264e-30 | 18 |
| 1.292988e-34 | SYK DZ 2      | -0.4364289     | 0.997 | 0.996        | 2.305268e-30 | 18 |
| 1.300718e-34 | RPS13 DZ 2    | 0.3649867      | 0.601 | 0.256        | 2.319051e-30 | 18 |
| 1.423215e-34 | ATXN10 DZ 2   | 0.3766621      | 0.671 | 0.312        | 2.537451e-30 | 18 |
| 1.602513e-34 | FCRLA DZ 2    | -0.4660319     | 1     | 0.997        | 2.857121e-30 | 18 |
| 1.805635e-34 | RPS23 DZ 2    | 0.3532624      | 0.449 | 0.143        | 3.219267e-30 | 18 |
| 1.9709e-34   | SNX1 DZ 2     | 0.3399055      | 0.613 | 0.277        | 3.513917e-30 | 18 |
| 2.080939e-34 | MRPL22 DZ 2   | 0.3280114      | 0.898 | 0.62         | 3.710106e-30 | 18 |
| 2.808243e-34 | LAMTOR5 DZ 2  | 0.7535361      | 0.24  | 0.072        | 5.006816e-30 | 18 |
| 3.348906e-34 | IGHA2 DZ 2    | 0.345042 0.574 | 0.244 | 5.970765e-30 | 18           |    |
| 3.625364e-34 | NAP1L4 DZ 2   | 0.3897477      | 0.455 | 0.147        | 6.463662e-30 | 18 |
| 3.878247e-34 | MYL6B DZ 2    | 0.4034697      | 0.49  | 0.188        | 6.914526e-30 | 18 |
| 4.343433e-34 | REPIN1 DZ 2   | 0.3821345      | 0.417 | 0.124        | 7.743908e-30 | 18 |
| 4.576205e-34 | ETS1 DZ 2     | 0.3893639      | 0.552 | 0.227        | 8.158917e-30 | 18 |
| 4.577684e-34 | ZNF581 DZ 2   | 0.3898871      | 0.376 | 0.116        | 8.161552e-30 | 18 |
| 4.700127e-34 | CFAP20 DZ 2   | 0.3733837      | 0.469 | 0.172        | 8.379857e-30 | 18 |
| 5.00086e-34  | HINT2 DZ 2    | 0.320702 0.338 | 0.091 | 8.916034e-30 | 18           |    |
| 5.148454e-34 | TEX30 DZ 2    | 0.3865977      | 0.354 | 0.112        | 9.179179e-30 | 18 |
| 6.785112e-34 | GOT2 DZ 2     | 0.3171388      | 0.825 | 0.509        | 1.209718e-29 | 18 |

|              |                |       |       |              |    |  |
|--------------|----------------|-------|-------|--------------|----|--|
| DNAJC8       | DZ 2           |       |       |              |    |  |
| 7.369685e-34 | 0.3501788      | 0.337 | 0.095 | 1.313941e-29 | 18 |  |
| ARMT1        | DZ 2           |       |       |              |    |  |
| 8.971024e-34 | 0.3902627      | 0.367 | 0.118 | 1.599444e-29 | 18 |  |
| LM04         | DZ 2           |       |       |              |    |  |
| 9.778729e-34 | 0.3425916      | 0.44  | 0.146 | 1.74345e-29  | 18 |  |
| ARPC1A       | DZ 2           |       |       |              |    |  |
| 1.014842e-33 | 0.356514 0.447 | 0.157 |       | 1.809363e-29 | 18 |  |
| PPP4R2       | DZ 2           |       |       |              |    |  |
| 1.057972e-33 | 0.3627895      | 0.338 | 0.099 | 1.886259e-29 | 18 |  |
| MRPL35       | DZ 2           |       |       |              |    |  |
| 1.103276e-33 | 0.3459818      | 0.338 | 0.098 | 1.967031e-29 | 18 |  |
| AMZ2         | DZ 2           |       |       |              |    |  |
| 1.188625e-33 | 0.3443501      | 0.499 | 0.191 | 2.1192e-29   | 18 |  |
| WAPL         | DZ 2           |       |       |              |    |  |
| 1.215225e-33 | 0.36069 0.37   | 0.099 |       | 2.166625e-29 | 18 |  |
| OTULIN       | DZ 2           |       |       |              |    |  |
| 1.28214e-33  | 0.372089 0.403 | 0.128 |       | 2.285927e-29 | 18 |  |
| PAPSS1       | DZ 2           |       |       |              |    |  |
| 1.286048e-33 | 0.3785306      | 0.276 | 0.066 | 2.292895e-29 | 18 |  |
| ZSCAN16-AS1  | DZ 2           |       |       |              |    |  |
| 1.393188e-33 | -0.7753351     | 0.982 | 0.976 | 2.483914e-29 | 18 |  |
| FTH1         | DZ 2           |       |       |              |    |  |
| 1.425273e-33 | 0.3342159      | 0.6   | 0.254 | 2.541119e-29 | 18 |  |
| HNRNPH2      | DZ 2           |       |       |              |    |  |
| 1.566285e-33 | 0.3028304      | 0.223 | 0.043 | 2.792529e-29 | 18 |  |
| NSD2         | DZ 2           |       |       |              |    |  |
| 1.574062e-33 | 0.3308787      | 0.255 | 0.051 | 2.806395e-29 | 18 |  |
| BCL6         | DZ 2           |       |       |              |    |  |
| 1.593406e-33 | 0.3634829      | 0.521 | 0.199 | 2.840883e-29 | 18 |  |
| PXK          | DZ 2           |       |       |              |    |  |
| 1.595674e-33 | 0.3426781      | 0.636 | 0.298 | 2.844927e-29 | 18 |  |
| SNF8         | DZ 2           |       |       |              |    |  |
| 1.815854e-33 | 0.3564298      | 0.301 | 0.075 | 3.237485e-29 | 18 |  |
| FAM45A       | DZ 2           |       |       |              |    |  |
| 1.886135e-33 | 0.3248387      | 0.778 | 0.44  | 3.36279e-29  | 18 |  |
| PGAM1        | DZ 2           |       |       |              |    |  |
| 1.937338e-33 | 0.3614253      | 0.538 | 0.211 | 3.454079e-29 | 18 |  |
| IFI27L2      | DZ 2           |       |       |              |    |  |
| 1.939109e-33 | 0.3515799      | 0.356 | 0.098 | 3.457237e-29 | 18 |  |
| RASSF1       | DZ 2           |       |       |              |    |  |
| 1.953043e-33 | -0.9814257     | 0.317 | 0.428 | 3.482081e-29 | 18 |  |
| PLP2         | DZ 2           |       |       |              |    |  |
| 2.050659e-33 | 0.3773434      | 0.608 | 0.269 | 3.65612e-29  | 18 |  |
| YY1          | DZ 2           |       |       |              |    |  |
| 3.279314e-33 | 0.3289765      | 0.798 | 0.489 | 5.84669e-29  | 18 |  |
| AP2M1        | DZ 2           |       |       |              |    |  |
| 3.619829e-33 | 0.3543879      | 0.61  | 0.269 | 6.453793e-29 | 18 |  |
| SDHB         | DZ 2           |       |       |              |    |  |
| 4.745024e-33 | 0.3500989      | 0.523 | 0.208 | 8.459903e-29 | 18 |  |

|              |            |       |       |              |    |  |
|--------------|------------|-------|-------|--------------|----|--|
| FAM192A      | DZ 2       |       |       |              |    |  |
| 4.786143e-33 | -0.8002306 | 0.197 | 0.307 | 8.533215e-29 | 18 |  |
| ARHGAP24     | DZ 2       |       |       |              |    |  |
| 6.493813e-33 | 0.3219564  | 0.294 | 0.067 | 1.157782e-28 | 18 |  |
| SPAG16       | DZ 2       |       |       |              |    |  |
| 7.078865e-33 | 0.3392961  | 0.301 | 0.067 | 1.262091e-28 | 18 |  |
| DHFR         | DZ 2       |       |       |              |    |  |
| 8.373938e-33 | 0.3498345  | 0.373 | 0.108 | 1.492989e-28 | 18 |  |
| HPS1         | DZ 2       |       |       |              |    |  |
| 8.525194e-33 | 0.3204967  | 0.728 | 0.382 | 1.519957e-28 | 18 |  |
| NDUFS6       | DZ 2       |       |       |              |    |  |
| 8.714205e-33 | 0.3507725  | 0.452 | 0.156 | 1.553656e-28 | 18 |  |
| DNAJC9       | DZ 2       |       |       |              |    |  |
| 1.128786e-32 | -0.6121027 | 0.974 | 0.974 | 2.012513e-28 | 18 |  |
| MT-ND4       | DZ 2       |       |       |              |    |  |
| 1.209336e-32 | 0.4245716  | 0.434 | 0.133 | 2.156126e-28 | 18 |  |
| SIT1         | DZ 2       |       |       |              |    |  |
| 1.438851e-32 | -0.5246085 | 0.982 | 0.984 | 2.565327e-28 | 18 |  |
| RPL29        | DZ 2       |       |       |              |    |  |
| 1.71426e-32  | 0.3232782  | 0.67  | 0.319 | 3.056354e-28 | 18 |  |
| SNRNP70      | DZ 2       |       |       |              |    |  |
| 1.941041e-32 | 0.3657061  | 0.276 | 0.066 | 3.460683e-28 | 18 |  |
| ST14         | DZ 2       |       |       |              |    |  |
| 2.137935e-32 | 0.3727105  | 0.308 | 0.089 | 3.811724e-28 | 18 |  |
| ATP6V1C1     | DZ 2       |       |       |              |    |  |
| 2.506802e-32 | 0.3374254  | 0.772 | 0.413 | 4.469377e-28 | 18 |  |
| NDUFA12      | DZ 2       |       |       |              |    |  |
| 3.02638e-32  | -0.873601  | 0.063 | 0.199 | 5.395734e-28 | 18 |  |
| ACP5         | DZ 2       |       |       |              |    |  |
| 3.314421e-32 | 0.3205711  | 0.545 | 0.223 | 5.90928e-28  | 18 |  |
| HIKESHI      | DZ 2       |       |       |              |    |  |
| 3.352246e-32 | 0.3689112  | 0.536 | 0.216 | 5.97672e-28  | 18 |  |
| MPLKIP       | DZ 2       |       |       |              |    |  |
| 3.859795e-32 | 0.3014877  | 0.775 | 0.44  | 6.881628e-28 | 18 |  |
| PSMB7        | DZ 2       |       |       |              |    |  |
| 4.681443e-32 | 0.3478343  | 0.459 | 0.164 | 8.346545e-28 | 18 |  |
| TARDBP       | DZ 2       |       |       |              |    |  |
| 4.752211e-32 | 0.3533337  | 0.369 | 0.112 | 8.472717e-28 | 18 |  |
| CYTH2        | DZ 2       |       |       |              |    |  |
| 4.791528e-32 | 0.3035701  | 0.794 | 0.463 | 8.542815e-28 | 18 |  |
| SNRPF        | DZ 2       |       |       |              |    |  |
| 5.044004e-32 | 0.3430133  | 0.627 | 0.278 | 8.992954e-28 | 18 |  |
| DPY30        | DZ 2       |       |       |              |    |  |
| 5.209772e-32 | -0.6671091 | 0.972 | 0.977 | 9.288502e-28 | 18 |  |
| RPS10        | DZ 2       |       |       |              |    |  |
| 5.236218e-32 | 0.3682998  | 0.518 | 0.202 | 9.335652e-28 | 18 |  |
| EBLN3P       | DZ 2       |       |       |              |    |  |
| 6.905398e-32 | -0.7024147 | 0.069 | 0.185 | 1.231163e-27 | 18 |  |
| PLPP5        | DZ 2       |       |       |              |    |  |
| 7.995653e-32 | 0.3400646  | 0.667 | 0.314 | 1.425545e-27 | 18 |  |

|              |                |       |              |              |    |  |
|--------------|----------------|-------|--------------|--------------|----|--|
| IGBP1        | DZ 2           |       |              |              |    |  |
| 1.112645e-31 | 0.3243091      | 0.734 | 0.405        | 1.983734e-27 | 18 |  |
| HNRNPR       | DZ 2           |       |              |              |    |  |
| 1.178702e-31 | 0.316342 0.365 | 0.107 | 2.101507e-27 | 18           |    |  |
| RAD51C       | DZ 2           |       |              |              |    |  |
| 1.254672e-31 | 0.3161999      | 0.456 | 0.15         | 2.236956e-27 | 18 |  |
| SVBP         | DZ 2           |       |              |              |    |  |
| 1.298778e-31 | 0.3069256      | 0.676 | 0.323        | 2.315591e-27 | 18 |  |
| PPP2R1A      | DZ 2           |       |              |              |    |  |
| 1.416121e-31 | 0.3210829      | 0.539 | 0.222        | 2.524802e-27 | 18 |  |
| FUBP1        | DZ 2           |       |              |              |    |  |
| 1.588113e-31 | 0.3120379      | 0.317 | 0.084        | 2.831447e-27 | 18 |  |
| CDCA4        | DZ 2           |       |              |              |    |  |
| 1.861306e-31 | 0.3279665      | 0.364 | 0.114        | 3.318523e-27 | 18 |  |
| XP01         | DZ 2           |       |              |              |    |  |
| 1.913595e-31 | 0.3406105      | 0.382 | 0.122        | 3.411748e-27 | 18 |  |
| CMC2         | DZ 2           |       |              |              |    |  |
| 2.044442e-31 | 0.3201712      | 0.242 | 0.056        | 3.645036e-27 | 18 |  |
| TSC1         | DZ 2           |       |              |              |    |  |
| 2.138594e-31 | 0.3178963      | 0.328 | 0.083        | 3.812899e-27 | 18 |  |
| RFX5         | DZ 2           |       |              |              |    |  |
| 2.168377e-31 | 0.3624834      | 0.636 | 0.3          | 3.865999e-27 | 18 |  |
| TIMM8B       | DZ 2           |       |              |              |    |  |
| 2.262929e-31 | 0.3063846      | 0.575 | 0.248        | 4.034577e-27 | 18 |  |
| NOSIP        | DZ 2           |       |              |              |    |  |
| 2.484902e-31 | 0.3540865      | 0.466 | 0.168        | 4.430331e-27 | 18 |  |
| HMG20B       | DZ 2           |       |              |              |    |  |
| 2.569503e-31 | 0.3199909      | 0.749 | 0.421        | 4.581167e-27 | 18 |  |
| ANP32A       | DZ 2           |       |              |              |    |  |
| 2.616914e-31 | 0.3247978      | 0.241 | 0.048        | 4.665696e-27 | 18 |  |
| NNT          | DZ 2           |       |              |              |    |  |
| 2.735567e-31 | 0.351827 0.361 | 0.114 | 4.877242e-27 | 18           |    |  |
| POLR2D       | DZ 2           |       |              |              |    |  |
| 2.775416e-31 | 0.3070786      | 0.709 | 0.373        | 4.948289e-27 | 18 |  |
| VDAC2        | DZ 2           |       |              |              |    |  |
| 2.972131e-31 | 0.3325331      | 0.281 | 0.063        | 5.299013e-27 | 18 |  |
| FAM200B      | DZ 2           |       |              |              |    |  |
| 3.059906e-31 | 0.3145554      | 0.37  | 0.114        | 5.455507e-27 | 18 |  |
| PLEKHB2      | DZ 2           |       |              |              |    |  |
| 3.453708e-31 | 0.3330089      | 0.448 | 0.147        | 6.157616e-27 | 18 |  |
| VRK3         | DZ 2           |       |              |              |    |  |
| 3.515317e-31 | 0.3055089      | 0.681 | 0.332        | 6.267458e-27 | 18 |  |
| BUD31        | DZ 2           |       |              |              |    |  |
| 3.996362e-31 | 0.3090999      | 0.496 | 0.191        | 7.125115e-27 | 18 |  |
| TXNDC12      | DZ 2           |       |              |              |    |  |
| 4.535104e-31 | 0.3251878      | 0.69  | 0.35         | 8.085637e-27 | 18 |  |
| AP2S1        | DZ 2           |       |              |              |    |  |
| 4.816041e-31 | 0.3056014      | 0.699 | 0.361        | 8.58652e-27  | 18 |  |
| RPS19BP1     | DZ 2           |       |              |              |    |  |
| 5.667362e-31 | 0.4109469      | 0.58  | 0.251        | 1.010434e-26 | 18 |  |

|              |                |       |              |              |    |  |
|--------------|----------------|-------|--------------|--------------|----|--|
| MDM4         | DZ 2           |       |              |              |    |  |
| 6.641959e-31 | 0.3382193      | 0.299 | 0.078        | 1.184195e-26 | 18 |  |
| SHLD1        | DZ 2           |       |              |              |    |  |
| 7.997512e-31 | 0.3089205      | 0.667 | 0.336        | 1.425876e-26 | 18 |  |
| PDCD10       | DZ 2           |       |              |              |    |  |
| 1.282289e-30 | 0.311722 0.764 | 0.444 | 2.286192e-26 | 18           |    |  |
| EIF5         | DZ 2           |       |              |              |    |  |
| 1.315296e-30 | 0.3015063      | 0.285 | 0.069        | 2.345042e-26 | 18 |  |
| KATNA1       | DZ 2           |       |              |              |    |  |
| 1.344859e-30 | 0.3428373      | 0.472 | 0.18         | 2.397749e-26 | 18 |  |
| MFNG         | DZ 2           |       |              |              |    |  |
| 1.619403e-30 | 0.3382257      | 0.557 | 0.223        | 2.887233e-26 | 18 |  |
| NGLY1        | DZ 2           |       |              |              |    |  |
| 1.632906e-30 | 0.3636004      | 0.427 | 0.148        | 2.911307e-26 | 18 |  |
| TAF11        | DZ 2           |       |              |              |    |  |
| 1.75538e-30  | -0.6171435     | 0.978 | 0.976        | 3.129667e-26 | 18 |  |
| RPL36A       | DZ 2           |       |              |              |    |  |
| 2.425804e-30 | 0.3184561      | 0.409 | 0.138        | 4.324966e-26 | 18 |  |
| CEBPZ0S      | DZ 2           |       |              |              |    |  |
| 2.500542e-30 | 0.3326058      | 0.516 | 0.213        | 4.458216e-26 | 18 |  |
| COPS5        | DZ 2           |       |              |              |    |  |
| 2.905643e-30 | 0.3213296      | 0.387 | 0.123        | 5.18047e-26  | 18 |  |
| DDA1         | DZ 2           |       |              |              |    |  |
| 3.160343e-30 | 0.3233882      | 0.421 | 0.143        | 5.634575e-26 | 18 |  |
| MCRS1        | DZ 2           |       |              |              |    |  |
| 4.141836e-30 | 0.3354989      | 0.308 | 0.088        | 7.384479e-26 | 18 |  |
| MSH6         | DZ 2           |       |              |              |    |  |
| 4.827139e-30 | -0.5828341     | 0.99  | 0.981        | 8.606307e-26 | 18 |  |
| RPL5         | DZ 2           |       |              |              |    |  |
| 5.104349e-30 | 0.3405411      | 0.354 | 0.097        | 9.100545e-26 | 18 |  |
| BACH2        | DZ 2           |       |              |              |    |  |
| 5.734125e-30 | 0.351424 0.523 | 0.213 | 1.022337e-25 | 18           |    |  |
| CHMP5        | DZ 2           |       |              |              |    |  |
| 5.833952e-30 | 0.3220415      | 0.516 | 0.209        | 1.040135e-25 | 18 |  |
| TIAL1        | DZ 2           |       |              |              |    |  |
| 6.232049e-30 | 0.3117977      | 0.591 | 0.27         | 1.111112e-25 | 18 |  |
| MRPL47       | DZ 2           |       |              |              |    |  |
| 6.754358e-30 | 0.4157882      | 0.784 | 0.484        | 1.204234e-25 | 18 |  |
| UCP2         | DZ 2           |       |              |              |    |  |
| 9.53966e-30  | 0.3085454      | 0.391 | 0.127        | 1.700826e-25 | 18 |  |
| CNIH4        | DZ 2           |       |              |              |    |  |
| 1.133956e-29 | 0.3057129      | 0.29  | 0.075        | 2.021729e-25 | 18 |  |
| TPP2         | DZ 2           |       |              |              |    |  |
| 1.168965e-29 | 0.310979 0.228 | 0.043 | 2.084147e-25 | 18           |    |  |
| FCH01        | DZ 2           |       |              |              |    |  |
| 1.345653e-29 | 0.311968 0.602 | 0.273 | 2.399165e-25 | 18           |    |  |
| PPHLN1       | DZ 2           |       |              |              |    |  |
| 1.384139e-29 | 0.3462977      | 0.443 | 0.165        | 2.467782e-25 | 18 |  |
| RBBP6        | DZ 2           |       |              |              |    |  |
| 1.483906e-29 | 0.3114739      | 0.286 | 0.071        | 2.645657e-25 | 18 |  |



|              |                 |            |       |       |              |    |
|--------------|-----------------|------------|-------|-------|--------------|----|
| 1.53814e-29  | TMED8<br>DZ 2   | 0.3244264  | 0.326 | 0.094 | 2.74235e-25  | 18 |
| 1.670698e-29 | IFT27<br>DZ 2   | -1.242518  | 0.17  | 0.265 | 2.978688e-25 | 18 |
| 1.674229e-29 | S100A4<br>DZ 2  | 0.3401496  | 0.468 | 0.172 | 2.984983e-25 | 18 |
| 1.722112e-29 | RRAGA<br>DZ 2   | 0.3314984  | 0.412 | 0.148 | 3.070353e-25 | 18 |
| 1.924083e-29 | MPC1<br>DZ 2    | -0.4048921 | 1     | 0.999 | 3.430448e-25 | 18 |
| 2.032178e-29 | RPS6<br>DZ 2    | 0.3261812  | 0.418 | 0.141 | 3.623171e-25 | 18 |
| 2.10306e-29  | P2RY8<br>DZ 2   | 0.3257301  | 0.63  | 0.308 | 3.749546e-25 | 18 |
| 2.188173e-29 | SPI1<br>DZ 2    | 0.3213389  | 0.483 | 0.182 | 3.901294e-25 | 18 |
| 2.519126e-29 | CHRA1<br>DZ 2   | 0.312523   | 0.609 | 0.279 | 4.491349e-25 | 18 |
| 2.54946e-29  | RTF2<br>DZ 2    | -0.7412575 | 0.075 | 0.2   | 4.545432e-25 | 18 |
| 2.972313e-29 | YBX3<br>DZ 2    | 0.3263714  | 0.535 | 0.234 | 5.299336e-25 | 18 |
| 3.545577e-29 | PRKRA<br>DZ 2   | 0.3097894  | 0.263 | 0.064 | 6.32141e-25  | 18 |
| 4.855618e-29 | TEX9<br>DZ 2    | 0.3554252  | 0.508 | 0.207 | 8.657081e-25 | 18 |
| 5.196011e-29 | TRA2A<br>DZ 2   | 0.3172649  | 0.288 | 0.076 | 9.263969e-25 | 18 |
| 5.336726e-29 | MYO1E<br>DZ 2   | 0.3285145  | 0.549 | 0.224 | 9.514849e-25 | 18 |
| 5.427275e-29 | ATM<br>DZ 2     | 0.3298426  | 0.539 | 0.21  | 9.676289e-25 | 18 |
| 6.972211e-29 | SNRNP25<br>DZ 2 | 0.3187407  | 0.513 | 0.209 | 1.243076e-24 | 18 |
| 8.725786e-29 | MOB4<br>DZ 2    | 0.306983   | 0.422 | 0.143 | 1.55572e-24  | 18 |
| 9.882164e-29 | C5orf15<br>DZ 2 | 0.3135178  | 0.465 | 0.175 | 1.761891e-24 | 18 |
| 9.920891e-29 | TAF12<br>DZ 2   | -0.7482305 | 0.924 | 0.916 | 1.768796e-24 | 18 |
| 1.052832e-28 | EEF1B2<br>DZ 2  | 0.3671782  | 0.417 | 0.135 | 1.877094e-24 | 18 |
| 1.138362e-28 | MKNK2<br>DZ 2   | -0.6235427 | 0.982 | 0.96  | 2.029586e-24 | 18 |
| 1.253454e-28 | RPL23<br>DZ 2   | 0.314389   | 0.347 | 0.111 | 2.234783e-24 | 18 |
| 1.344871e-28 | ASXL1<br>DZ 2   | 0.3077284  | 0.536 | 0.228 | 2.397771e-24 | 18 |
| 1.395034e-28 | PHF5A<br>DZ 2   | -0.9876531 | 0.481 | 0.524 | 2.487205e-24 | 18 |

|              |                 |            |       |       |              |    |
|--------------|-----------------|------------|-------|-------|--------------|----|
| 1.39536e-28  | ID3<br>DZ 2     | 0.3074136  | 0.329 | 0.105 | 2.487787e-24 | 18 |
| 1.464203e-28 | DAP<br>DZ 2     | 0.3110974  | 0.222 | 0.036 | 2.610527e-24 | 18 |
| 1.587025e-28 | MILR1<br>DZ 2   | 0.3069089  | 0.58  | 0.244 | 2.829506e-24 | 18 |
| 1.705133e-28 | WIPF1<br>DZ 2   | 0.3038021  | 0.387 | 0.122 | 3.040081e-24 | 18 |
| 1.814662e-28 | SUZ12<br>DZ 2   | 0.3112461  | 0.249 | 0.058 | 3.235361e-24 | 18 |
| 1.849914e-28 | BARD1<br>DZ 2   | 0.312536   | 0.31  | 0.088 | 3.298212e-24 | 18 |
| 1.949313e-28 | XPNPEP1<br>DZ 2 | 0.3692348  | 0.38  | 0.124 | 3.475431e-24 | 18 |
| 2.271964e-28 | NFATC1<br>DZ 2  | 0.3083736  | 0.561 | 0.229 | 4.050684e-24 | 18 |
| 2.405168e-28 | MRFAP1<br>DZ 2  | -0.5357183 | 0.97  | 0.971 | 4.288174e-24 | 18 |
| 2.577569e-28 | RPL22<br>DZ 2   | 0.3243513  | 0.435 | 0.161 | 4.595549e-24 | 18 |
| 2.738348e-28 | COX11<br>DZ 2   | 0.3687148  | 0.662 | 0.322 | 4.882201e-24 | 18 |
| 3.51093e-28  | GYPC<br>DZ 2    | 0.3150144  | 0.418 | 0.161 | 6.259637e-24 | 18 |
| 3.675047e-28 | HIGD1A<br>DZ 2  | -0.682991  | 0.085 | 0.197 | 6.552241e-24 | 18 |
| 3.96794e-28  | CLEC2B<br>DZ 2  | 0.4379949  | 0.589 | 0.263 | 7.07444e-24  | 18 |
| 5.024581e-28 | PIM1<br>DZ 2    | 0.3247277  | 0.513 | 0.21  | 8.958325e-24 | 18 |
| 7.39246e-28  | RAB1A<br>DZ 2   | 0.344842   | 0.539 | 0.228 | 1.318002e-23 | 18 |
| 8.495194e-28 | AKAP13<br>DZ 2  | 0.3400778  | 0.324 | 0.095 | 1.514608e-23 | 18 |
| 1.376438e-27 | SYVN1<br>DZ 2   | 0.3214369  | 0.308 | 0.085 | 2.454051e-23 | 18 |
| 1.385217e-27 | VEZT<br>DZ 2    | 0.3359471  | 0.652 | 0.292 | 2.469703e-23 | 18 |
| 1.597732e-27 | TCF4<br>DZ 2    | -0.3747232 | 0.997 | 0.998 | 2.848597e-23 | 18 |
| 1.68806e-27  | RPL3<br>DZ 2    | 0.3137616  | 0.574 | 0.266 | 3.009642e-23 | 18 |
| 1.995862e-27 | MRPL33<br>DZ 2  | 0.3110658  | 0.573 | 0.26  | 3.558422e-23 | 18 |
| 2.751e-27    | MTCH2<br>DZ 2   | -0.545588  | 0.992 | 0.987 | 4.904758e-23 | 18 |
| 2.791828e-27 | RPL14<br>DZ 2   | 0.3102866  | 0.808 | 0.497 | 4.977549e-23 | 18 |
| 3.140591e-27 | PSMB9<br>DZ 2   | 0.3104314  | 0.39  | 0.126 | 5.59936e-23  | 18 |

|              |                  |            |       |       |              |    |
|--------------|------------------|------------|-------|-------|--------------|----|
| 3.426458e-27 | KMT2A<br>DZ 2    | -0.6138925 | 0.063 | 0.173 | 6.109032e-23 | 18 |
| 3.726199e-27 | BCL2<br>DZ 2     | 0.3051105  | 0.251 | 0.065 | 6.643441e-23 | 18 |
| 4.136858e-27 | MFHAS1<br>DZ 2   | 0.5006031  | 0.325 | 0.106 | 7.375604e-23 | 18 |
| 4.966174e-27 | CD9<br>DZ 2      | 0.3840857  | 0.39  | 0.144 | 8.854192e-23 | 18 |
| 5.132254e-27 | ALOX5<br>DZ 2    | 0.3386636  | 0.72  | 0.394 | 9.150295e-23 | 18 |
| 6.626691e-27 | NDUFS5<br>DZ 2   | 0.6129522  | 0.415 | 0.202 | 1.181473e-22 | 18 |
| 8.387466e-27 | LGALS1<br>DZ 2   | -0.7278595 | 0.043 | 0.16  | 1.495401e-22 | 18 |
| 9.435241e-27 | LMNA<br>DZ 2     | 0.3109222  | 0.486 | 0.202 | 1.682209e-22 | 18 |
| 1.098765e-26 | MRPS14<br>DZ 2   | 0.3326395  | 0.411 | 0.125 | 1.958988e-22 | 18 |
| 1.524492e-26 | STIM2<br>DZ 2    | 0.3292323  | 0.434 | 0.149 | 2.718016e-22 | 18 |
| 1.578844e-26 | MCM7<br>DZ 2     | 0.3319376  | 0.37  | 0.12  | 2.814921e-22 | 18 |
| 2.345986e-26 | DLAT<br>DZ 2     | 0.319132   | 0.522 | 0.219 | 4.182658e-22 | 18 |
| 2.415219e-26 | SIAH2<br>DZ 2    | 0.3449575  | 0.494 | 0.202 | 4.306094e-22 | 18 |
| 2.98408e-26  | SNHG25<br>DZ 2   | 0.3321289  | 0.487 | 0.192 | 5.320316e-22 | 18 |
| 3.995206e-26 | SREK1IP1<br>DZ 2 | 0.3030394  | 0.367 | 0.13  | 7.123052e-22 | 18 |
| 4.59077e-26  | PPP4R3B<br>DZ 2  | 0.311502   | 0.198 | 0.044 | 8.184884e-22 | 18 |
| 4.729485e-26 | ALDH5A1<br>DZ 2  | 0.303373   | 0.394 | 0.136 | 8.432199e-22 | 18 |
| 7.158781e-26 | COR01B<br>DZ 2   | 0.327376   | 0.58  | 0.302 | 1.276339e-21 | 18 |
| 7.520468e-26 | FERMT3<br>DZ 2   | 0.3158146  | 0.276 | 0.072 | 1.340824e-21 | 18 |
| 7.861033e-26 | DNASE1<br>DZ 2   | 0.3065712  | 0.381 | 0.132 | 1.401543e-21 | 18 |
| 9.910015e-26 | GTF2E2<br>DZ 2   | -0.7597492 | 0.22  | 0.329 | 1.766857e-21 | 18 |
| 1.294758e-25 | PTPN6<br>DZ 2    | -0.7533534 | 0.363 | 0.423 | 2.308423e-21 | 18 |
| 1.305891e-25 | APEX1<br>DZ 2    | -0.8439801 | 0.784 | 0.757 | 2.328273e-21 | 18 |
| 2.232606e-25 | MT-ND5<br>DZ 2   | 0.3019671  | 0.548 | 0.255 | 3.980513e-21 | 18 |
| 2.597762e-25 | UBE2V2<br>DZ 2   | 0.3074926  | 0.295 | 0.079 | 4.63155e-21  | 18 |

|              |                |       |              |              |    |  |
|--------------|----------------|-------|--------------|--------------|----|--|
| GPR18        | DZ 2           |       |              |              |    |  |
| 4.60072e-25  | -0.3610564     | 0.994 | 0.994        | 8.202624e-21 | 18 |  |
| RPS9         | DZ 2           |       |              |              |    |  |
| 7.977084e-25 | 0.306146 0.446 | 0.177 | 1.422234e-20 | 18           |    |  |
| MCL1         | DZ 2           |       |              |              |    |  |
| 8.228461e-25 | 0.3195555      | 0.433 | 0.179        | 1.467052e-20 | 18 |  |
| LRRC59       | DZ 2           |       |              |              |    |  |
| 1.272171e-24 | 0.3109081      | 0.294 | 0.087        | 2.268154e-20 | 18 |  |
| RITA1        | DZ 2           |       |              |              |    |  |
| 1.57852e-24  | 0.3326468      | 0.528 | 0.222        | 2.814344e-20 | 18 |  |
| NSMCE1       | DZ 2           |       |              |              |    |  |
| 1.664013e-24 | 0.324678 0.382 | 0.145 | 2.966768e-20 | 18           |    |  |
| TBL1XR1      | DZ 2           |       |              |              |    |  |
| 1.686045e-24 | -0.5721735     | 0.053 | 0.151        | 3.006049e-20 | 18 |  |
| CELF2        | DZ 2           |       |              |              |    |  |
| 1.796093e-24 | -0.6127094     | 0.949 | 0.934        | 3.202254e-20 | 18 |  |
| MT-ATP6      | DZ 2           |       |              |              |    |  |
| 2.047255e-24 | -0.8912851     | 0.429 | 0.479        | 3.650051e-20 | 18 |  |
| SQSTM1       | DZ 2           |       |              |              |    |  |
| 2.060982e-24 | -0.6364111     | 0.04  | 0.138        | 3.674524e-20 | 18 |  |
| FCER2        | DZ 2           |       |              |              |    |  |
| 2.474134e-24 | 0.3259909      | 0.455 | 0.186        | 4.411133e-20 | 18 |  |
| NDUFA8       | DZ 2           |       |              |              |    |  |
| 7.62034e-24  | 0.3104163      | 0.444 | 0.172        | 1.35863e-19  | 18 |  |
| RGS19        | DZ 2           |       |              |              |    |  |
| 1.561355e-23 | 0.3332395      | 0.788 | 0.484        | 2.783739e-19 | 18 |  |
| LTB          | DZ 2           |       |              |              |    |  |
| 1.644222e-23 | 0.3029685      | 0.31  | 0.099        | 2.931483e-19 | 18 |  |
| ALDH2        | DZ 2           |       |              |              |    |  |
| 1.826495e-23 | -0.5017395     | 0.984 | 0.981        | 3.256457e-19 | 18 |  |
| RPSA         | DZ 2           |       |              |              |    |  |
| 4.165392e-23 | 0.4590026      | 0.562 | 0.205        | 7.426478e-19 | 18 |  |
| PLCG2        | DZ 2           |       |              |              |    |  |
| 4.181725e-23 | -0.4842967     | 0.031 | 0.119        | 7.455597e-19 | 18 |  |
| FCGR2B       | DZ 2           |       |              |              |    |  |
| 4.319336e-23 | 0.3416878      | 0.175 | 0.032        | 7.700944e-19 | 18 |  |
| PEG10        | DZ 2           |       |              |              |    |  |
| 6.512158e-23 | -0.7371058     | 0.141 | 0.239        | 1.161053e-18 | 18 |  |
| CAPG         | DZ 2           |       |              |              |    |  |
| 6.752995e-23 | -0.7073064     | 0.937 | 0.935        | 1.203992e-18 | 18 |  |
| BTG1         | DZ 2           |       |              |              |    |  |
| 7.692578e-23 | -0.6929743     | 0.199 | 0.268        | 1.37151e-18  | 18 |  |
| HHEX         | DZ 2           |       |              |              |    |  |
| 9.327317e-23 | 0.3528014      | 0.429 | 0.154        | 1.662967e-18 | 18 |  |
| KIAA0040     | DZ 2           |       |              |              |    |  |
| 1.793361e-22 | 0.3102616      | 0.447 | 0.183        | 3.197383e-18 | 18 |  |
| DECR1        | DZ 2           |       |              |              |    |  |
| 1.880044e-22 | 0.3394329      | 0.205 | 0.05         | 3.35193e-18  | 18 |  |
| SERPINA9     | DZ 2           |       |              |              |    |  |
| 2.134973e-22 | -0.6924754     | 0.304 | 0.385        | 3.806443e-18 | 18 |  |

|              |                             |       |       |              |    |
|--------------|-----------------------------|-------|-------|--------------|----|
| 2.416895e-22 | C19orf70 DZ 2<br>-0.6539152 | 0.225 | 0.307 | 4.309081e-18 | 18 |
| 8.642134e-22 | TMEM147 DZ 2<br>0.3014418   | 0.254 | 0.072 | 1.540806e-17 | 18 |
| 1.265312e-21 | ADAM17 DZ 2<br>-0.7051316   | 0.251 | 0.33  | 2.255925e-17 | 18 |
| 2.541941e-21 | TRBC2 DZ 2<br>-0.7314322    | 0.431 | 0.45  | 4.532026e-17 | 18 |
| 5.809349e-21 | DRAP1 DZ 2<br>-0.6966765    | 0.197 | 0.281 | 1.035749e-16 | 18 |
| 5.983273e-21 | SRM DZ 2<br>-0.7683236      | 0.769 | 0.751 | 1.066758e-16 | 18 |
| 8.085066e-21 | HLA-C DZ 2<br>-0.599001     | 0.07  | 0.159 | 1.441486e-16 | 18 |
| 1.458521e-20 | SLC2A3 DZ 2<br>-0.4406063   | 0.984 | 0.98  | 2.600397e-16 | 18 |
| 1.661101e-20 | RPL7A DZ 2<br>-0.9514244    | 0.517 | 0.499 | 2.961577e-16 | 18 |
| 2.432857e-20 | SSR4 DZ 2<br>-0.7889842     | 0.591 | 0.575 | 4.337541e-16 | 18 |
| 3.292296e-20 | APRT DZ 2<br>-0.5701038     | 0.075 | 0.165 | 5.869834e-16 | 18 |
| 6.752705e-20 | MARCKS DZ 2<br>-0.5002545   | 0.962 | 0.959 | 1.20394e-15  | 18 |
| 9.057763e-20 | MT-CYB DZ 2<br>-0.3649266   | 0.996 | 0.993 | 1.614909e-15 | 18 |
| 1.333082e-19 | RPL6 DZ 2<br>-0.6792758     | 0.161 | 0.213 | 2.376752e-15 | 18 |
| 1.654015e-19 | LBH DZ 2<br>-0.5925551      | 0.184 | 0.252 | 2.948944e-15 | 18 |
| 1.836355e-19 | DNPH1 DZ 2<br>-0.4726871    | 0.067 | 0.149 | 3.274038e-15 | 18 |
| 1.98813e-19  | MVP DZ 2<br>-0.5765981      | 0.142 | 0.226 | 3.544636e-15 | 18 |
| 2.033469e-19 | TMEM109 DZ 2<br>-0.7929647  | 0.435 | 0.448 | 3.625471e-15 | 18 |
| 2.044975e-19 | PNRC1 DZ 2<br>-0.4560914    | 0.032 | 0.102 | 3.645986e-15 | 18 |
| 3.019395e-19 | RHOC DZ 2<br>-0.6009553     | 0.149 | 0.208 | 5.38328e-15  | 18 |
| 7.701689e-19 | C16orf74 DZ 2<br>-0.666481  | 0.637 | 0.627 | 1.373134e-14 | 18 |
| 4.402364e-18 | ATP6V0E1 DZ 2<br>-0.7197768 | 0.42  | 0.438 | 7.848974e-14 | 18 |
| 1.030698e-17 | IL2RG DZ 2<br>-0.446236     | 0.035 | 0.106 | 1.837631e-13 | 18 |
| 1.639508e-17 | MTSS1 DZ 2<br>-0.4029306    | 0.039 | 0.116 | 2.923079e-13 | 18 |
| 5.361746e-17 | PYCR1 DZ 2<br>-0.584951     | 0.13  | 0.197 | 9.559458e-13 | 18 |

|              |           |      |            |       |       |              |    |
|--------------|-----------|------|------------|-------|-------|--------------|----|
| 1.242248e-16 | CHPT1     | DZ 2 | -0.5499005 | 0.088 | 0.167 | 2.214805e-12 | 18 |
| 1.599776e-16 | CBX6      | DZ 2 | -0.5998078 | 0.124 | 0.212 | 2.852241e-12 | 18 |
| 1.791251e-16 | MGST3     | DZ 2 | -0.4752574 | 0.088 | 0.151 | 3.193622e-12 | 18 |
| 2.053347e-16 | ESYT1     | DZ 2 | -0.633367  | 0.148 | 0.219 | 3.660913e-12 | 18 |
| 5.152795e-16 | EIF4EBP1  | DZ 2 | -0.529869  | 0.152 | 0.191 | 9.186918e-12 | 18 |
| 5.871484e-16 | S1PR4     | DZ 2 | -0.4184292 | 0.06  | 0.121 | 1.046827e-11 | 18 |
| 1.511724e-15 | IL27RA    | DZ 2 | -0.4071767 | 0.079 | 0.147 | 2.695253e-11 | 18 |
| 1.545829e-15 | PRDX4     | DZ 2 | -0.5219514 | 0.118 | 0.175 | 2.756058e-11 | 18 |
| 1.615125e-15 | ASAH1     | DZ 2 | -0.8913777 | 0.461 | 0.472 | 2.879605e-11 | 18 |
| 1.85485e-15  | CD83      | DZ 2 | -0.4459742 | 0.051 | 0.106 | 3.307012e-11 | 18 |
| 2.533637e-15 | C1orf162  | DZ 2 | -0.633275  | 0.206 | 0.238 | 4.517222e-11 | 18 |
| 3.004332e-15 | CD55      | DZ 2 | -0.7175341 | 0.395 | 0.414 | 5.356424e-11 | 18 |
| 9.644542e-15 | NPC2      | DZ 2 | -0.7033821 | 0.308 | 0.328 | 1.719525e-10 | 18 |
| 1.052766e-14 | ZFP36     | DZ 2 | -0.7210186 | 0.462 | 0.472 | 1.876977e-10 | 18 |
| 1.910643e-14 | SNHG8     | DZ 2 | -0.674574  | 0.513 | 0.501 | 3.406485e-10 | 18 |
| 1.994912e-14 | FOXP1     | DZ 2 | -0.540339  | 0.262 | 0.286 | 3.556729e-10 | 18 |
| 2.264651e-14 | SP110     | DZ 2 | -0.5634239 | 0.089 | 0.161 | 4.037645e-10 | 18 |
| 4.805609e-14 | DDIT4     | DZ 2 | -0.4159811 | 0.058 | 0.11  | 8.567921e-10 | 18 |
| 7.070212e-14 | LINC02397 | DZ 2 | -0.3783211 | 0.052 | 0.105 | 1.260548e-09 | 18 |
| 7.972414e-14 | PDE4B     | DZ 2 | -0.3864536 | 0.062 | 0.12  | 1.421402e-09 | 18 |
| 1.473456e-13 | LIPA      | DZ 2 | -0.6134368 | 0.404 | 0.389 | 2.627025e-09 | 18 |
| 1.479105e-13 | ARL6IP5   | DZ 2 | -0.7810602 | 0.456 | 0.463 | 2.637096e-09 | 18 |
| 2.044742e-13 | CD63      | DZ 2 | -0.4188071 | 0.097 | 0.151 | 3.645571e-09 | 18 |
| 2.699072e-13 | CYB5A     | DZ 2 | -0.6156026 | 0.392 | 0.387 | 4.812175e-09 | 18 |
| 6.186625e-13 | PSAP      | DZ 2 | -0.5471169 | 0.317 | 0.345 | 1.103013e-08 | 18 |

|              |                  |            |       |       |              |    |
|--------------|------------------|------------|-------|-------|--------------|----|
| 8.364411e-13 | RNH1<br>DZ 2     | -0.3403116 | 0.995 | 0.99  | 1.491291e-08 | 18 |
| 8.406506e-13 | RPL10A<br>DZ 2   | -0.5924099 | 0.329 | 0.348 | 1.498796e-08 | 18 |
| 8.737354e-13 | LITAF<br>DZ 2    | -0.4305487 | 0.131 | 0.18  | 1.557783e-08 | 18 |
| 1.009417e-12 | DNPEP<br>DZ 2    | -0.3536768 | 0.088 | 0.14  | 1.79969e-08  | 18 |
| 1.204663e-12 | TMEM205<br>DZ 2  | -0.596876  | 0.324 | 0.337 | 2.147793e-08 | 18 |
| 1.275802e-12 | CD48<br>DZ 2     | -0.4080264 | 0.066 | 0.113 | 2.274628e-08 | 18 |
| 1.441116e-12 | P2RY10<br>DZ 2   | -0.3910786 | 0.053 | 0.11  | 2.569366e-08 | 18 |
| 1.73682e-12  | SNX9<br>DZ 2     | -0.5949286 | 0.833 | 0.751 | 3.096577e-08 | 18 |
| 2.618531e-12 | TOMM7<br>DZ 2    | -0.3041325 | 0.053 | 0.106 | 4.668578e-08 | 18 |
| 4.354667e-12 | CD320<br>DZ 2    | -0.6314603 | 0.816 | 0.768 | 7.763935e-08 | 18 |
| 4.67499e-12  | RPL17<br>DZ 2    | -0.8352385 | 0.404 | 0.409 | 8.33504e-08  | 18 |
| 5.022784e-12 | TXN<br>DZ 2      | -0.3879935 | 0.073 | 0.115 | 8.955122e-08 | 18 |
| 8.427684e-12 | CLN8<br>DZ 2     | -0.4948109 | 0.131 | 0.171 | 1.502572e-07 | 18 |
| 1.311713e-11 | PARP14<br>DZ 2   | -0.3306068 | 0.99  | 0.982 | 2.338653e-07 | 18 |
| 1.44583e-11  | TPT1<br>DZ 2     | -0.3143228 | 0.056 | 0.11  | 2.577771e-07 | 18 |
| 1.624226e-11 | HEXB<br>DZ 2     | -0.6247404 | 0.631 | 0.569 | 2.895832e-07 | 18 |
| 2.786704e-11 | SNX2<br>DZ 2     | -0.3358287 | 0.087 | 0.138 | 4.968414e-07 | 18 |
| 3.603484e-11 | QTRT1<br>DZ 2    | -0.6112291 | 0.342 | 0.329 | 6.424651e-07 | 18 |
| 3.649213e-11 | SMC6<br>DZ 2     | -0.5261541 | 0.286 | 0.285 | 6.506182e-07 | 18 |
| 4.780449e-11 | CNPY3<br>DZ 2    | -0.3565799 | 0.067 | 0.118 | 8.523063e-07 | 18 |
| 5.743537e-11 | SLAMF1<br>DZ 2   | -0.6357628 | 0.903 | 0.847 | 1.024015e-06 | 18 |
| 7.26758e-11  | HSP90AB1<br>DZ 2 | -0.7079728 | 0.325 | 0.327 | 1.295737e-06 | 18 |
| 8.05886e-11  | SLC3A2<br>DZ 2   | -0.5707387 | 0.367 | 0.362 | 1.436814e-06 | 18 |
| 8.348469e-11 | ANXA6<br>DZ 2    | -0.439721  | 0.104 | 0.153 | 1.488449e-06 | 18 |
| 9.524606e-11 | CEBPB<br>DZ 2    | -0.3961967 | 0.106 | 0.149 | 1.698142e-06 | 18 |

|              |                |       |              |              |    |  |
|--------------|----------------|-------|--------------|--------------|----|--|
| SVIP         | DZ 2           |       |              |              |    |  |
| 1.265532e-10 | -0.50724 0.083 | 0.126 | 2.256317e-06 | 18           |    |  |
| LGALS3       | DZ 2           |       |              |              |    |  |
| 1.501607e-10 | -0.6331523     | 0.532 | 0.491        | 2.677216e-06 | 18 |  |
| ANKRD12      | DZ 2           |       |              |              |    |  |
| 1.753952e-10 | -0.3656772     | 0.122 | 0.164        | 3.12712e-06  | 18 |  |
| MRPL24       | DZ 2           |       |              |              |    |  |
| 1.803877e-10 | -0.3174983     | 0.08  | 0.131        | 3.216133e-06 | 18 |  |
| SRPRB        | DZ 2           |       |              |              |    |  |
| 1.963092e-10 | -0.5893881     | 0.521 | 0.475        | 3.499996e-06 | 18 |  |
| N4BP2L2      | DZ 2           |       |              |              |    |  |
| 2.123382e-10 | -0.6118039     | 0.078 | 0.132        | 3.785778e-06 | 18 |  |
| MYC          | DZ 2           |       |              |              |    |  |
| 2.156834e-10 | -0.6860391     | 0.549 | 0.502        | 3.84542e-06  | 18 |  |
| TSC22D3      | DZ 2           |       |              |              |    |  |
| 2.728787e-10 | -0.4975309     | 0.159 | 0.197        | 4.865154e-06 | 18 |  |
| TYMP         | DZ 2           |       |              |              |    |  |
| 3.437212e-10 | -0.6494673     | 0.355 | 0.337        | 6.128206e-06 | 18 |  |
| HVCN1        | DZ 2           |       |              |              |    |  |
| 3.52097e-10  | -0.5024349     | 0.202 | 0.229        | 6.277538e-06 | 18 |  |
| NT5C3A       | DZ 2           |       |              |              |    |  |
| 1.001231e-09 | -0.3378816     | 0.115 | 0.156        | 1.785094e-05 | 18 |  |
| FAM162A      | DZ 2           |       |              |              |    |  |
| 1.245802e-09 | -0.4301978     | 0.188 | 0.217        | 2.221141e-05 | 18 |  |
| C4orf48      | DZ 2           |       |              |              |    |  |
| 1.488387e-09 | -0.3084284     | 0.078 | 0.115        | 2.653645e-05 | 18 |  |
| U2AF1L4      | DZ 2           |       |              |              |    |  |
| 2.487858e-09 | -0.4797098     | 0.231 | 0.242        | 4.435603e-05 | 18 |  |
| HLA-F        | DZ 2           |       |              |              |    |  |
| 2.615925e-09 | -0.5966482     | 0.338 | 0.302        | 4.663933e-05 | 18 |  |
| ZFP36L2      | DZ 2           |       |              |              |    |  |
| 3.223698e-09 | -0.4071224     | 0.146 | 0.163        | 5.747531e-05 | 18 |  |
| TNFRSF14     | DZ 2           |       |              |              |    |  |
| 4.00593e-09  | -0.462556      | 0.176 | 0.189        | 7.142173e-05 | 18 |  |
| IFNGR1       | DZ 2           |       |              |              |    |  |
| 4.41907e-09  | -0.4094808     | 0.218 | 0.23         | 7.878759e-05 | 18 |  |
| CCDC85B      | DZ 2           |       |              |              |    |  |
| 5.347834e-09 | -0.5533882     | 0.272 | 0.268        | 9.534653e-05 | 18 |  |
| JUN          | DZ 2           |       |              |              |    |  |
| 6.00172e-09  | -0.3310566     | 0.089 | 0.114        | 0.0001070047 | 18 |  |
| LGALS9       | DZ 2           |       |              |              |    |  |
| 7.181009e-09 | -0.5007448     | 0.374 | 0.361        | 0.0001280302 | 18 |  |
| TAPBP        | DZ 2           |       |              |              |    |  |
| 7.586232e-09 | -0.5368416     | 0.415 | 0.383        | 0.0001352549 | 18 |  |
| LAPTM4A      | DZ 2           |       |              |              |    |  |
| 1.122802e-08 | -0.4846267     | 0.268 | 0.263        | 0.0002001844 | 18 |  |
| TTC3         | DZ 2           |       |              |              |    |  |
| 1.299107e-08 | -0.5172285     | 0.273 | 0.282        | 0.0002316179 | 18 |  |
| MT-ND4L      | DZ 2           |       |              |              |    |  |
| 1.304354e-08 | -0.3486998     | 0.1   | 0.129        | 0.0002325532 | 18 |  |



|              |                |       |             |              |    |  |
|--------------|----------------|-------|-------------|--------------|----|--|
| ICAM2        | DZ 2           |       |             |              |    |  |
| 1.819621e-08 | -0.6484817     | 0.378 | 0.359       | 0.0003244202 | 18 |  |
| ARID5B       | DZ 2           |       |             |              |    |  |
| 2.065176e-08 | -0.3933634     | 0.973 | 0.944       | 0.0003682002 | 18 |  |
| NACA         | DZ 2           |       |             |              |    |  |
| 2.372337e-08 | -0.3391015     | 0.109 | 0.13        | 0.000422964  | 18 |  |
| MUM1         | DZ 2           |       |             |              |    |  |
| 2.780205e-08 | -0.4368251     | 0.135 | 0.148       | 0.0004956827 | 18 |  |
| ARRDC2       | DZ 2           |       |             |              |    |  |
| 2.993616e-08 | -0.5316198     | 0.36  | 0.341       | 0.0005337318 | 18 |  |
| PKIG         | DZ 2           |       |             |              |    |  |
| 3.682471e-08 | -0.3481874     | 0.093 | 0.123       | 0.0006565478 | 18 |  |
| RAB13        | DZ 2           |       |             |              |    |  |
| 5.755067e-08 | -0.5710994     | 0.563 | 0.49        | 0.001026071  | 18 |  |
| CYTIP        | DZ 2           |       |             |              |    |  |
| 5.885457e-08 | -0.4077567     | 0.176 | 0.202       | 0.001049318  | 18 |  |
| NPM3         | DZ 2           |       |             |              |    |  |
| 7.532526e-08 | -0.45883 0.288 | 0.286 | 0.001342974 | 18           |    |  |
| ERG28        | DZ 2           |       |             |              |    |  |
| 1.06975e-07  | -0.3784235     | 0.093 | 0.134       | 0.001907258  | 18 |  |
| AC016831.5   | DZ 2           |       |             |              |    |  |
| 1.311807e-07 | -0.3133442     | 0.113 | 0.117       | 0.00233882   | 18 |  |
| CARD16       | DZ 2           |       |             |              |    |  |
| 2.008295e-07 | -0.3327705     | 0.109 | 0.137       | 0.003580589  | 18 |  |
| IFRD2        | DZ 2           |       |             |              |    |  |
| 2.284216e-07 | -0.3330895     | 0.152 | 0.163       | 0.004072528  | 18 |  |
| HM13         | DZ 2           |       |             |              |    |  |
| 2.414571e-07 | -0.3281736     | 0.109 | 0.127       | 0.004304939  | 18 |  |
| ZEB2         | DZ 2           |       |             |              |    |  |
| 2.650332e-07 | -0.3890248     | 0.148 | 0.158       | 0.004725277  | 18 |  |
| TGIF1        | DZ 2           |       |             |              |    |  |
| 3.221119e-07 | -0.4139925     | 0.179 | 0.183       | 0.005742933  | 18 |  |
| MBP          | DZ 2           |       |             |              |    |  |
| 3.283361e-07 | -0.3745745     | 0.157 | 0.158       | 0.005853904  | 18 |  |
| GLIPR1       | DZ 2           |       |             |              |    |  |
| 3.504032e-07 | -0.4245414     | 0.215 | 0.217       | 0.006247338  | 18 |  |
| NFKBIE       | DZ 2           |       |             |              |    |  |
| 3.522651e-07 | -0.4667468     | 0.242 | 0.242       | 0.006280535  | 18 |  |
| PHACTR1      | DZ 2           |       |             |              |    |  |
| 3.664226e-07 | -0.4227185     | 0.184 | 0.174       | 0.006532949  | 18 |  |
| MARCH1       | DZ 2           |       |             |              |    |  |
| 5.349119e-07 | -0.3241419     | 0.15  | 0.16        | 0.009536944  | 18 |  |
| VKORC1       | DZ 2           |       |             |              |    |  |
| 5.688356e-07 | -0.3276464     | 0.931 | 0.711       | 0.01014177   | 18 |  |
| ENO1         | DZ 2           |       |             |              |    |  |
| 6.36932e-07  | -0.4185358     | 0.321 | 0.298       | 0.01135586   | 18 |  |
| MPHOSPH8     | DZ 2           |       |             |              |    |  |
| 6.421236e-07 | -0.5174765     | 0.808 | 0.715       | 0.01144842   | 18 |  |
| EIF4A2       | DZ 2           |       |             |              |    |  |
| 6.895158e-07 | -0.4890836     | 0.497 | 0.443       | 0.01229338   | 18 |  |

|              |            |       |       |             |    |  |
|--------------|------------|-------|-------|-------------|----|--|
| ATP5MC1      | DZ 2       |       |       |             |    |  |
| 7.190724e-07 | -0.3028995 | 0.988 | 0.976 | 0.01282034  | 18 |  |
| UBA52        | DZ 2       |       |       |             |    |  |
| 8.209814e-07 | -0.3369677 | 0.135 | 0.147 | 0.01463728  | 18 |  |
| TSPAN3       | DZ 2       |       |       |             |    |  |
| 9.654156e-07 | -0.3544653 | 0.202 | 0.208 | 0.01721239  | 18 |  |
| GNL3         | DZ 2       |       |       |             |    |  |
| 9.859403e-07 | -0.3132955 | 0.113 | 0.123 | 0.01757833  | 18 |  |
| RNF213       | DZ 2       |       |       |             |    |  |
| 9.871415e-07 | -0.463059  | 0.229 | 0.232 | 0.01759975  | 18 |  |
| TARS         | DZ 2       |       |       |             |    |  |
| 1.147804e-06 | -0.5608574 | 0.37  | 0.345 | 0.0204642   | 18 |  |
| CAST         | DZ 2       |       |       |             |    |  |
| 1.343387e-06 | -0.4632993 | 0.92  | 0.846 | 0.02395125  | 18 |  |
| CD37         | DZ 2       |       |       |             |    |  |
| 1.458459e-06 | -0.3183348 | 0.119 | 0.138 | 0.02600287  | 18 |  |
| SMIM29       | DZ 2       |       |       |             |    |  |
| 1.473248e-06 | -0.3447266 | 0.097 | 0.131 | 0.02626653  | 18 |  |
| RP9          | DZ 2       |       |       |             |    |  |
| 1.565419e-06 | -0.3356967 | 0.911 | 0.881 | 0.02790986  | 18 |  |
| MT-ND1       | DZ 2       |       |       |             |    |  |
| 2.534743e-06 | -0.4773749 | 0.351 | 0.322 | 0.04519194  | 18 |  |
| NOP56        | DZ 2       |       |       |             |    |  |
| 2.625796e-06 | -0.5353348 | 0.747 | 0.651 | 0.04681531  | 18 |  |
| HLA-DQA1     | DZ 2       |       |       |             |    |  |
| 2.745824e-06 | -0.3219679 | 0.167 | 0.185 | 0.0489553   | 18 |  |
| YIF1A        | DZ 2       |       |       |             |    |  |
| 3.970314e-06 | -0.9933814 | 0.966 | 0.926 | 0.07078672  | 18 |  |
| IGKC         | DZ 2       |       |       |             |    |  |
| 5.630232e-06 | -0.3162088 | 0.111 | 0.12  | 0.1003814   | 18 |  |
| LACTB        | DZ 2       |       |       |             |    |  |
| 6.478444e-06 | -0.8264108 | 0.881 | 0.641 | 0.1155042   | 18 |  |
| IGLC2        | DZ 2       |       |       |             |    |  |
| 7.140185e-06 | -0.4529789 | 0.528 | 0.459 | 0.1273024   | 18 |  |
| GADD45GIP1   | DZ 2       |       |       |             |    |  |
| 1.198885e-05 | -0.5116026 | 0.895 | 0.814 | 0.2137492   | 18 |  |
| NOP53        | DZ 2       |       |       |             |    |  |
| 1.478211e-05 | -0.4015351 | 0.367 | 0.324 | 0.2635502   | 18 |  |
| P4HB         | DZ 2       |       |       |             |    |  |
| 1.607619e-05 | -0.4681821 | 0.394 | 0.337 | 0.2866224   | 18 |  |
| IER2         | DZ 2       |       |       |             |    |  |
| 2.150697e-05 | -0.3034783 | 0.981 | 0.957 | 0.3834478   | 18 |  |
| RPL24        | DZ 2       |       |       |             |    |  |
| 3.118695e-05 | -0.3136269 | 0.228 | 0.225 | 0.5560321   | 18 |  |
| C19orf24     | DZ 2       |       |       |             |    |  |
| 4.200527e-05 | -0.3603378 | 0.201 | 0.196 | 0.748912 18 |    |  |
| AARS         | DZ 2       |       |       |             |    |  |
| 4.457062e-05 | -0.3715984 | 0.225 | 0.204 | 0.7946495   | 18 |  |
| AP1S2        | DZ 2       |       |       |             |    |  |
| 5.220529e-05 | -0.4138938 | 0.312 | 0.243 | 0.930768 18 |    |  |

|              |            |       |       |           |    |    |
|--------------|------------|-------|-------|-----------|----|----|
| RASGRP2 DZ 2 |            |       |       |           |    |    |
| 5.496677e-05 | -0.3401444 | 0.237 | 0.233 | 0.9800025 |    | 18 |
| CDK4         |            |       |       |           |    |    |
| DZ 2         |            |       |       |           |    |    |
| 6.568704e-05 | -0.4018904 | 0.212 | 0.199 | 1         | 18 |    |
| PPP3CA DZ 2  |            |       |       |           |    |    |
| 6.670439e-05 | -0.4405212 | 0.391 | 0.318 | 1         | 18 |    |
| LTA4H DZ 2   |            |       |       |           |    |    |
| 9.296005e-05 | -0.320993  | 0.175 | 0.171 | 1         | 18 |    |
| TRIM44 DZ 2  |            |       |       |           |    |    |
| 0.0001642129 | -0.3088494 | 0.168 | 0.155 | 1         | 18 |    |
| LMBRD1 DZ 2  |            |       |       |           |    |    |
| 0.00018608   | -0.510663  | 0.626 | 0.531 | 1         | 18 |    |
| IMPDH2 DZ 2  |            |       |       |           |    |    |
| 0.0002035011 | -0.3882147 | 0.334 | 0.29  | 1         | 18 |    |
| PYURF DZ 2   |            |       |       |           |    |    |
| 0.0002984736 | -0.3990355 | 0.361 | 0.296 | 1         | 18 |    |
| PDLIM1 DZ 2  |            |       |       |           |    |    |
| 0.0003733282 | -0.3508098 | 0.264 | 0.229 | 1         | 18 |    |
| TTC19 DZ 2   |            |       |       |           |    |    |
| 0.0004662365 | -0.3065049 | 0.212 | 0.189 | 1         | 18 |    |
| SYTL1 DZ 2   |            |       |       |           |    |    |
| 0.0007048264 | -0.3281651 | 0.123 | 0.136 | 1         | 18 |    |
| PSAT1 DZ 2   |            |       |       |           |    |    |
| 0.000783987  | -0.4839485 | 0.652 | 0.651 | 1         | 18 |    |
| RPS4Y1 DZ 2  |            |       |       |           |    |    |
| 0.0007983759 | -0.4839601 | 0.584 | 0.478 | 1         | 18 |    |
| ISCU DZ 2    |            |       |       |           |    |    |
| 0.0008058492 | -0.418297  | 0.554 | 0.478 | 1         | 18 |    |
| RSL1D1 DZ 2  |            |       |       |           |    |    |
| 0.0008099755 | -0.4248046 | 0.29  | 0.279 | 1         | 18 |    |
| WARS DZ 2    |            |       |       |           |    |    |
| 0.0008115495 | -0.4190514 | 0.499 | 0.406 | 1         | 18 |    |
| PPIB DZ 2    |            |       |       |           |    |    |
| 0.0009705813 | -0.3258652 | 0.218 | 0.203 | 1         | 18 |    |
| NDFIP1 DZ 2  |            |       |       |           |    |    |
| 0.000992151  | -0.8807615 | 0.544 | 0.427 | 1         | 18 |    |
| IGLC3 DZ 2   |            |       |       |           |    |    |
| 0.00110159   | -0.329708  | 0.308 | 0.256 | 1         | 18 |    |
| MRPS26 DZ 2  |            |       |       |           |    |    |
| 0.001102575  | -0.4046647 | 0.409 | 0.335 | 1         | 18 |    |
| S100A11 DZ 2 |            |       |       |           |    |    |
| 0.00129289   | -0.453957  | 0.291 | 0.255 | 1         | 18 |    |
| SRGN DZ 2    |            |       |       |           |    |    |
| 0.001666568  | -0.3315932 | 0.306 | 0.252 | 1         | 18 |    |
| SLC50A1 DZ 2 |            |       |       |           |    |    |
| 0.001916348  | -0.3627723 | 0.933 | 0.747 | 1         | 18 |    |
| CXCR4 DZ 2   |            |       |       |           |    |    |
| 0.003322671  | -0.4758004 | 0.626 | 0.492 | 1         | 18 |    |
| SP100 DZ 2   |            |       |       |           |    |    |
| 0.004173038  | -0.378714  | 0.652 | 0.4   | 1         | 18 |    |

|               |                |       |               |               |     |  |  |
|---------------|----------------|-------|---------------|---------------|-----|--|--|
| FABP5 DZ 2    |                |       |               |               |     |  |  |
| 0.004310741   | -0.3863923     | 0.373 | 0.318         | 1             | 18  |  |  |
| SNHG7 DZ 2    |                |       |               |               |     |  |  |
| 0.004441736   | -0.4522409     | 0.797 | 0.695         | 1             | 18  |  |  |
| HLA-DQB1 DZ 2 |                |       |               |               |     |  |  |
| 0.005032343   | -0.4354322     | 0.361 | 0.295         | 1             | 18  |  |  |
| NFKBIA DZ 2   |                |       |               |               |     |  |  |
| 0.005830825   | -0.4177609     | 0.499 | 0.397         | 1             | 18  |  |  |
| BLOC1S2 DZ 2  |                |       |               |               |     |  |  |
| 0.007535123   | -0.3322744     | 0.266 | 0.202         | 1             | 18  |  |  |
| IRF1 DZ 2     |                |       |               |               |     |  |  |
| 0.007718462   | -0.3053134     | 0.218 | 0.187         | 1             | 18  |  |  |
| GPATCH4 DZ 2  |                |       |               |               |     |  |  |
| 0.007724927   | -0.3009747     | 0.237 | 0.184         | 1             | 18  |  |  |
| ANKRD44 DZ 2  |                |       |               |               |     |  |  |
| 0.008452393   | -0.3993049     | 0.576 | 0.431         | 1             | 18  |  |  |
| CYB561A3 DZ 2 |                |       |               |               |     |  |  |
| 0.009602653   | -0.3076045     | 0.345 | 0.289         | 1             | 18  |  |  |
| DCTPP1 DZ 2   |                |       |               |               |     |  |  |
| 1.31751e-298  | 2.102598 0.789 | 0.138 | 2.348988e-294 | 19            | BIK |  |  |
| LZ            |                |       |               |               |     |  |  |
| 3.00384e-226  | 1.922664 0.698 | 0.143 | 5.355546e-222 | 19            |     |  |  |
| DUSP2 LZ      |                |       |               |               |     |  |  |
| 2.546294e-212 | 1.532765 0.639 | 0.084 | 4.539788e-208 | 19            |     |  |  |
| FCRL2 LZ      |                |       |               |               |     |  |  |
| 2.374113e-211 | 1.506478 0.723 | 0.168 | 4.232807e-207 | 19            |     |  |  |
| BCL2A1 LZ     |                |       |               |               |     |  |  |
| 4.289765e-200 | 1.326358 0.948 | 0.593 | 7.648222e-196 | 19            |     |  |  |
| PRDX1 LZ      |                |       |               |               |     |  |  |
| 6.400608e-200 | 1.347489 0.772 | 0.211 | 1.141164e-195 | 19            |     |  |  |
| TRAF4 LZ      |                |       |               |               |     |  |  |
| 6.111142e-187 | 1.464274 0.748 | 0.159 | 1.089555e-182 | 19            |     |  |  |
| CCDC88A LZ    |                |       |               |               |     |  |  |
| 4.652112e-186 | 1.418215 0.933 | 0.583 | 8.29425e-182  | 19            |     |  |  |
| MARCKSL1 LZ   |                |       |               |               |     |  |  |
| 8.586839e-176 | 1.298456 0.597 | 0.121 | 1.530948e-171 | 19            |     |  |  |
| NFATC1 LZ     |                |       |               |               |     |  |  |
| 1.629386e-175 | 1.603894 0.85  | 0.196 | 2.905032e-171 | 19            |     |  |  |
| RGS13 LZ      |                |       |               |               |     |  |  |
| 3.20242e-175  | 1.300992 0.887 | 0.367 | 5.709594e-171 | 19            |     |  |  |
| ACADM LZ      |                |       |               |               |     |  |  |
| 7.150632e-175 | 0.7982722      | 0.994 | 0.846         | 1.274886e-170 | 19  |  |  |
| HSP90AB1 LZ   |                |       |               |               |     |  |  |
| 1.034273e-151 | 1.272075 0.822 | 0.33  | 1.844006e-147 | 19            |     |  |  |
| SPIB LZ       |                |       |               |               |     |  |  |
| 3.075554e-150 | 1.145712 0.943 | 0.63  | 5.483405e-146 | 19            |     |  |  |
| HERPUD1 LZ    |                |       |               |               |     |  |  |
| 2.756297e-144 | 1.112672 0.744 | 0.263 | 4.914203e-140 | 19            | SMS |  |  |
| LZ            |                |       |               |               |     |  |  |
| 6.788654e-143 | 1.328446 0.796 | 0.26  | 1.210349e-138 | 19            |     |  |  |

|               |        |           |       |       |               |               |    |
|---------------|--------|-----------|-------|-------|---------------|---------------|----|
| PIM1          | LZ     |           |       |       |               |               |    |
| 3.121506e-135 |        | 1.11375   | 0.527 | 0.088 | 5.565334e-131 | 19            |    |
| FCRL5         | LZ     |           |       |       |               |               |    |
| 4.08593e-130  |        | 1.175438  | 0.552 | 0.109 | 7.284805e-126 | 19            |    |
| GMDS          | LZ     |           |       |       |               |               |    |
| 1.386246e-129 |        | 1.0646    | 0.884 | 0.39  | 2.471538e-125 | 19            |    |
| BASP1         | LZ     |           |       |       |               |               |    |
| 1.536807e-125 |        | 1.026023  | 0.506 | 0.096 | 2.739974e-121 | 19            |    |
| SEMA4A        | LZ     |           |       |       |               |               |    |
| 1.977744e-125 |        | 0.7498874 |       | 0.994 | 0.868         | 3.526119e-121 | 19 |
|               | ARPC2  |           |       |       |               |               |    |
|               | LZ     |           |       |       |               |               |    |
| 7.993238e-125 |        | 0.9189109 |       | 0.717 | 0.292         | 1.425114e-120 | 19 |
|               | NME1   |           |       |       |               |               |    |
|               | LZ     |           |       |       |               |               |    |
| 3.31235e-123  |        | 0.7780513 |       | 0.999 | 0.886         | 5.905588e-119 | 19 |
|               | GAPDH  |           |       |       |               |               |    |
|               | LZ     |           |       |       |               |               |    |
| 1.045162e-120 |        | 1.001411  | 0.677 | 0.196 | 1.86342e-116  | 19            |    |
| UBALD2        | LZ     |           |       |       |               |               |    |
| 3.521849e-119 |        | 0.8068958 |       | 0.916 | 0.605         | 6.279105e-115 | 19 |
|               | SYNGR2 |           |       |       |               |               |    |
|               | LZ     |           |       |       |               |               |    |
| 3.57773e-117  |        | 0.945239  | 0.834 | 0.397 | 6.378735e-113 | 19            |    |
| FABP5         | LZ     |           |       |       |               |               |    |
| 3.024126e-116 |        | 1.144612  | 0.759 | 0.34  | 5.391714e-112 | 19            |    |
| ABRACL        | LZ     |           |       |       |               |               |    |
| 9.829557e-115 |        | 0.7879464 |       | 0.999 | 0.932         | 1.752512e-110 | 19 |
|               | SERF2  |           |       |       |               |               |    |
|               | LZ     |           |       |       |               |               |    |
| 1.556925e-113 |        | 0.9473275 |       | 0.698 | 0.245         | 2.775841e-109 | 19 |
|               | RGS10  |           |       |       |               |               |    |
|               | LZ     |           |       |       |               |               |    |
| 4.853268e-112 |        | 0.8224153 |       | 0.947 | 0.592         | 8.652892e-108 | 19 |
|               | SEC61B |           |       |       |               |               |    |
|               | LZ     |           |       |       |               |               |    |
| 4.298842e-109 |        | -1.782388 |       | 0.309 | 0.704         | 7.664405e-105 | 19 |
|               | EMP3   |           |       |       |               |               |    |
|               | LZ     |           |       |       |               |               |    |
| 2.087885e-108 |        | 0.7328602 |       | 0.972 | 0.758         | 3.722491e-104 | 19 |
|               | PKM    |           |       |       |               |               |    |
|               | LZ     |           |       |       |               |               |    |
| 9.442997e-107 |        | 0.9848055 |       | 0.829 | 0.466         | 1.683592e-102 | 19 |
|               | CD83   |           |       |       |               |               |    |
|               | LZ     |           |       |       |               |               |    |
| 8.437765e-105 |        | 0.9699239 |       | 0.478 | 0.098         | 1.504369e-100 | 19 |
|               | SORL1  |           |       |       |               |               |    |
|               | LZ     |           |       |       |               |               |    |
| 3.414024e-103 |        | 1.032113  | 0.642 | 0.203 | 6.086864e-99  | 19            |    |
| SYAP1         | LZ     |           |       |       |               |               |    |
| 5.482312e-103 |        | 0.9717736 |       | 0.613 | 0.173         | 9.774414e-99  | 19 |
|               | LCK    |           |       |       |               |               |    |
|               | LZ     |           |       |       |               |               |    |
| 8.705462e-103 |        | 0.7708205 |       | 0.936 | 0.602         | 1.552097e-98  | 19 |
|               | POMP   |           |       |       |               |               |    |
|               | LZ     |           |       |       |               |               |    |
| 4.543463e-102 |        | 0.7913534 |       | 0.943 | 0.617         | 8.100541e-98  | 19 |
|               | ARPC1B |           |       |       |               |               |    |
|               | LZ     |           |       |       |               |               |    |
| 2.736651e-97  |        | 0.8214255 |       | 0.608 | 0.21          | 4.879175e-93  | 19 |
|               | NFKBIE |           |       |       |               |               |    |
|               | LZ     |           |       |       |               |               |    |
| 1.281207e-95  |        | 0.4677641 |       | 0.996 | 0.941         | 2.284264e-91  | 19 |
|               | YBX1   |           |       |       |               |               |    |
|               | LZ     |           |       |       |               |               |    |
| 6.443339e-95  |        | 1.128431  | 0.503 | 0.146 | 1.148783e-90  | 19            |    |

|              |           |       |       |              |    |  |
|--------------|-----------|-------|-------|--------------|----|--|
| NFKBID       | LZ        |       |       |              |    |  |
| 5.978657e-94 | 0.7751673 | 0.396 | 0.058 | 1.065935e-89 | 19 |  |
|              | PITPNC1   | LZ    |       |              |    |  |
| 1.771314e-93 | -1.665512 | 0.547 | 0.754 | 3.158075e-89 | 19 |  |
|              | CXCR4     | LZ    |       |              |    |  |
| 2.976023e-93 | 0.6838619 | 0.818 | 0.439 | 5.305951e-89 | 19 |  |
|              | C1QBP     | LZ    |       |              |    |  |
| 2.730987e-92 | 0.7343139 | 0.827 | 0.458 | 4.869077e-88 | 19 |  |
|              | PRMT1     | LZ    |       |              |    |  |
| 1.436247e-91 | 0.9273354 | 0.442 | 0.092 | 2.560684e-87 | 19 |  |
|              | CCDC28B   | LZ    |       |              |    |  |
| 4.822217e-91 | 0.7751431 | 0.815 | 0.387 | 8.597531e-87 | 19 |  |
|              | YWHAE     | LZ    |       |              |    |  |
| 1.902026e-90 | 0.8149838 | 0.488 | 0.146 | 3.391122e-86 | 19 |  |
|              | PPAN      | LZ    |       |              |    |  |
| 8.050903e-90 | 0.7339328 | 0.259 | 0.021 | 1.435395e-85 | 19 |  |
|              | ID2       | LZ    |       |              |    |  |
| 1.907002e-89 | 0.5868644 | 0.965 | 0.745 | 3.399993e-85 | 19 |  |
|              | RAN       | LZ    |       |              |    |  |
| 3.661529e-89 | 0.7602542 | 0.92  | 0.632 | 6.52814e-85  | 19 |  |
|              | SET       | LZ    |       |              |    |  |
| 1.359558e-88 | 0.702533  | 0.982 | 0.783 | 2.423956e-84 | 19 |  |
|              | ACTG1     | LZ    |       |              |    |  |
| 5.053495e-87 | 0.9303465 | 0.799 | 0.324 | 9.009876e-83 | 19 |  |
|              | GRHPR     | LZ    |       |              |    |  |
| 1.687586e-86 | 0.7275095 | 0.924 | 0.636 | 3.008797e-82 | 19 |  |
|              | ERH       | LZ    |       |              |    |  |
| 1.017722e-85 | 0.7965989 | 0.537 | 0.162 | 1.814496e-81 | 19 |  |
|              | SAMSN1    | LZ    |       |              |    |  |
| 4.484471e-85 | 0.7591878 | 0.912 | 0.579 | 7.995363e-81 | 19 |  |
|              | ATP5MC3   | LZ    |       |              |    |  |
| 2.833818e-84 | 0.7544253 | 0.738 | 0.343 | 5.052415e-80 | 19 |  |
|              | TIMM13    | LZ    |       |              |    |  |
| 6.568327e-84 | 0.8128504 | 0.773 | 0.322 | 1.171067e-79 | 19 |  |
|              | RFTN1     | LZ    |       |              |    |  |
| 9.207755e-84 | 0.7712329 | 0.783 | 0.386 | 1.641651e-79 | 19 |  |
|              | FNBP1     | LZ    |       |              |    |  |
| 1.313894e-82 | 0.3652362 | 0.999 | 0.928 | 2.342542e-78 | 19 |  |
|              | NPM1      | LZ    |       |              |    |  |
| 5.324702e-81 | 0.6223546 | 0.243 | 0.024 | 9.493411e-77 | 19 |  |
|              | FEZ1      | LZ    |       |              |    |  |
| 2.023554e-79 | 0.9060633 | 0.523 | 0.132 | 3.607795e-75 | 19 |  |
|              | SIT1      | LZ    |       |              |    |  |
| 2.03466e-79  | 0.8346375 | 0.782 | 0.359 | 3.627596e-75 | 19 |  |
|              | SNAP23    | LZ    |       |              |    |  |
| 2.22947e-79  | 0.6316505 | 0.86  | 0.498 | 3.974922e-75 | 19 |  |
|              | EIF3I     | LZ    |       |              |    |  |
| 5.21251e-79  | 0.6224116 | 0.958 | 0.732 | 9.293384e-75 | 19 |  |
|              | HSPA8     | LZ    |       |              |    |  |
| 6.94483e-79  | 0.4364232 | 0.957 | 0.711 | 1.238194e-74 | 19 |  |

|              |                |       |              |              |    |  |
|--------------|----------------|-------|--------------|--------------|----|--|
| EN01         | LZ             |       |              |              |    |  |
| 4.302203e-78 | 0.6933673      | 0.761 | 0.368        | 7.670398e-74 | 19 |  |
| LCP1         | LZ             |       |              |              |    |  |
| 5.511791e-78 | 0.6284102      | 0.31  | 0.038        | 9.826972e-74 | 19 |  |
| MCOLN2       | LZ             |       |              |              |    |  |
| 1.151603e-77 | 0.514048 0.997 | 0.902 | 2.053193e-73 | 19           |    |  |
| SRP14        | LZ             |       |              |              |    |  |
| 1.111716e-76 | 0.6112107      | 0.255 | 0.034        | 1.982079e-72 | 19 |  |
| CD70         | LZ             |       |              |              |    |  |
| 2.602692e-76 | 0.8736467      | 0.589 | 0.218        | 4.640339e-72 | 19 |  |
| SIAH2        | LZ             |       |              |              |    |  |
| 2.667592e-76 | 0.7194177      | 0.901 | 0.535        | 4.756049e-72 | 19 |  |
| PARP1        | LZ             |       |              |              |    |  |
| 1.377267e-75 | 0.5716339      | 0.892 | 0.566        | 2.455529e-71 | 19 |  |
| SNRPE        | LZ             |       |              |              |    |  |
| 2.528188e-75 | 0.7087606      | 0.524 | 0.167        | 4.507506e-71 | 19 |  |
| SNX8         | LZ             |       |              |              |    |  |
| 7.207735e-75 | 0.7007435      | 0.481 | 0.139        | 1.285067e-70 | 19 |  |
| MDFIC        | LZ             |       |              |              |    |  |
| 7.635703e-75 | 0.5794958      | 0.881 | 0.554        | 1.36137e-70  | 19 |  |
| NCL          | LZ             |       |              |              |    |  |
| 1.286233e-74 | 0.7730375      | 0.462 | 0.149        | 2.293225e-70 | 19 |  |
| RILPL2       | LZ             |       |              |              |    |  |
| 2.224558e-74 | 0.7554117      | 0.71  | 0.299        | 3.966165e-70 | 19 |  |
| TIMM8B       | LZ             |       |              |              |    |  |
| 1.377744e-72 | 0.6418283      | 0.906 | 0.574        | 2.45638e-68  | 19 |  |
| LDHB         | LZ             |       |              |              |    |  |
| 1.897327e-72 | 0.9156384      | 0.719 | 0.334        | 3.382744e-68 | 19 |  |
| LRMP         | LZ             |       |              |              |    |  |
| 7.049107e-72 | 0.6109745      | 0.79  | 0.456        | 1.256785e-67 | 19 |  |
| HSPD1        | LZ             |       |              |              |    |  |
| 1.445604e-71 | 0.7349484      | 0.808 | 0.412        | 2.577367e-67 | 19 |  |
| CTSH         | LZ             |       |              |              |    |  |
| 1.652758e-71 | 0.5444642      | 0.943 | 0.679        | 2.946701e-67 | 19 |  |
| SLC25A3      | LZ             |       |              |              |    |  |
| 1.669477e-71 | 0.6038581      | 0.94  | 0.629        | 2.97651e-67  | 19 |  |
| PSMA4        | LZ             |       |              |              |    |  |
| 3.511989e-70 | 0.5820592      | 0.836 | 0.484        | 6.261525e-66 | 19 |  |
| CCT3         | LZ             |       |              |              |    |  |
| 7.408038e-70 | 0.7614169      | 0.554 | 0.204        | 1.320779e-65 | 19 |  |
| CFLAR        | LZ             |       |              |              |    |  |
| 2.297271e-69 | 0.7378475      | 0.359 | 0.073        | 4.095804e-65 | 19 |  |
| LM02         | LZ             |       |              |              |    |  |
| 6.278153e-69 | 0.691629 0.415 | 0.117 | 1.119332e-64 | 19           |    |  |
| MAP3K8       | LZ             |       |              |              |    |  |
| 1.812372e-68 | 0.6417805      | 0.62  | 0.274        | 3.231278e-64 | 19 |  |
| SRM          | LZ             |       |              |              |    |  |
| 3.272193e-68 | 0.5129621      | 0.892 | 0.601        | 5.833994e-64 | 19 |  |
| RBM3         | LZ             |       |              |              |    |  |
| 4.291054e-68 | 0.6601797      | 0.336 | 0.073        | 7.650519e-64 | 19 |  |

|              |            |               |       |              |              |    |
|--------------|------------|---------------|-------|--------------|--------------|----|
| 5.069907e-68 | HCST LZ    | 0.8024578     | 0.745 | 0.322        | 9.039137e-64 | 19 |
| 1.543707e-66 | GYPC LZ    | 0.69857 0.309 | 0.057 | 2.752275e-62 | 19           |    |
| 2.644445e-66 | TESC LZ    | 0.7210286     | 0.713 | 0.318        | 4.714782e-62 | 19 |
| 3.371731e-66 | BLNK LZ    | 0.6418045     | 0.337 | 0.07         | 6.01146e-62  | 19 |
| 3.517485e-66 | DOK3 LZ    | 0.6236833     | 0.666 | 0.307        | 6.271324e-62 | 19 |
| 6.217212e-66 | AKR1A1 LZ  | 0.5890447     | 0.905 | 0.554        | 1.108467e-61 | 19 |
| 6.42361e-66  | ATP5PF LZ  | 0.5877937     | 0.754 | 0.383        | 1.145265e-61 | 19 |
| 3.320778e-65 | CCT5 LZ    | -0.8953836    | 0.997 | 0.985        | 5.920616e-61 | 19 |
| 9.078562e-65 | TMSB10 LZ  | 0.6789143     | 0.722 | 0.341        | 1.618617e-60 | 19 |
| 3.088574e-64 | RBM17 LZ   | 0.7192919     | 0.396 | 0.099        | 5.506618e-60 | 19 |
| 5.721088e-64 | OTULIN LZ  | -1.280097     | 0.203 | 0.374        | 1.020013e-59 | 19 |
| 1.659803e-63 | SELL LZ    | 0.4092767     | 0.999 | 0.898        | 2.959263e-59 | 19 |
| 6.64823e-63  | PFN1 LZ    | 0.5590161     | 0.848 | 0.468        | 1.185313e-58 | 19 |
| 5.57978e-62  | SNRPD1 LZ  | 0.5731682     | 0.933 | 0.653        | 9.94819e-58  | 19 |
| 5.763191e-62 | SLC25A5 LZ | 0.4568669     | 0.945 | 0.676        | 1.027519e-57 | 19 |
| 1.129634e-61 | SRSF3 LZ   | 0.5551491     | 0.887 | 0.568        | 2.014025e-57 | 19 |
| 2.284009e-61 | PARK7 LZ   | 0.5035737     | 0.917 | 0.6          | 4.07216e-57  | 19 |
| 3.124732e-61 | PSMB3 LZ   | 0.5551924     | 0.508 | 0.192        | 5.571084e-57 | 19 |
| 3.419856e-61 | ATIC LZ    | 0.3608984     | 0.992 | 0.922        | 6.097261e-57 | 19 |
| 1.044437e-60 | BTF3 LZ    | 0.583419 0.27 | 0.039 | 1.862127e-56 | 19           |    |
| 1.293378e-60 | IGF2BP3 LZ | 0.6172764     | 0.4   | 0.11         | 2.305964e-56 | 19 |
| 1.830459e-60 | NIN LZ     | 0.5091027     | 0.794 | 0.436        | 3.263525e-56 | 19 |
| 2.071009e-60 | PPA1 LZ    | 0.4833996     | 0.716 | 0.38         | 3.692402e-56 | 19 |
| 9.559706e-60 | NHP2 LZ    | 0.4998724     | 0.947 | 0.696        | 1.7044e-55   | 19 |
| 2.067088e-59 | ELOB LZ    | 0.6241964     | 0.778 | 0.41         | 3.68541e-55  | 19 |



|              |             |            |       |       |              |    |
|--------------|-------------|------------|-------|-------|--------------|----|
| 4.350552e-59 | PPP1CC LZ   | 0.7211272  | 0.59  | 0.231 | 7.756599e-55 | 19 |
| 1.902793e-58 | DSTN LZ     | -0.6663338 | 0.997 | 0.998 | 3.392491e-54 | 19 |
| 2.140016e-58 | B2M LZ      | 0.5176427  | 0.371 | 0.109 | 3.815435e-54 | 19 |
| 3.268262e-58 | MCRIP2 LZ   | 0.4532224  | 0.899 | 0.616 | 5.826985e-54 | 19 |
| 3.688497e-58 | ACTR3 LZ    | 0.4961481  | 0.908 | 0.603 | 6.57622e-54  | 19 |
| 4.941028e-58 | POLR2L LZ   | 0.5860771  | 0.786 | 0.425 | 8.809359e-54 | 19 |
| 6.154031e-58 | CLTA LZ     | 0.6571041  | 0.483 | 0.147 | 1.097202e-53 | 19 |
| 9.256503e-58 | CD72 LZ     | 0.564559   | 0.787 | 0.432 | 1.650342e-53 | 19 |
| 2.264518e-57 | COTL1 LZ    | 0.498919   | 0.117 | 0.004 | 4.03741e-53  | 19 |
| 4.392761e-57 | RSPH1 LZ    | 0.5508994  | 0.873 | 0.518 | 7.831854e-53 | 19 |
| 6.670266e-57 | FKBP1A LZ   | 0.7393701  | 0.287 | 0.049 | 1.189242e-52 | 19 |
| 8.808132e-57 | SERPINA9 LZ | 0.5823512  | 0.31  | 0.063 | 1.570402e-52 | 19 |
| 1.428246e-56 | MYO1C LZ    | 0.4442311  | 0.864 | 0.592 | 2.546419e-52 | 19 |
| 2.65327e-56  | LDHA LZ     | 0.4859254  | 0.773 | 0.423 | 4.730515e-52 | 19 |
| 2.678766e-56 | CCT2 LZ     | 0.6538459  | 0.572 | 0.204 | 4.775972e-52 | 19 |
| 3.874821e-56 | EHD1 LZ     | 0.4892787  | 0.958 | 0.719 | 6.908418e-52 | 19 |
| 4.509005e-56 | COX6C LZ    | -0.9698502 | 0.045 | 0.214 | 8.039105e-52 | 19 |
| 4.813928e-56 | PLAC8 LZ    | 0.5400291  | 0.253 | 0.033 | 8.582753e-52 | 19 |
| 9.877927e-56 | PASK LZ     | 0.5233281  | 0.842 | 0.518 | 1.761136e-51 | 19 |
| 1.297433e-55 | NDUFB8 LZ   | 0.4894265  | 0.905 | 0.624 | 2.313194e-51 | 19 |
| 2.716825e-55 | ATP5F1B LZ  | 0.9332983  | 0.751 | 0.385 | 4.843827e-51 | 19 |
| 3.120428e-55 | EIF5A LZ    | 0.5734098  | 0.815 | 0.443 | 5.563411e-51 | 19 |
| 3.226031e-55 | SEM1 LZ     | 0.5534111  | 0.586 | 0.27  | 5.75169e-51  | 19 |
| 6.793142e-55 | NDUFAF8 LZ  | 0.5615155  | 0.308 | 0.067 | 1.211149e-50 | 19 |
| 1.712874e-54 | BATF LZ     | 0.4610957  | 0.892 | 0.612 | 3.053883e-50 | 19 |

|              |              |                |       |              |              |     |
|--------------|--------------|----------------|-------|--------------|--------------|-----|
| 1.71941e-54  | SERBP1 LZ    | 0.5139663      | 0.779 | 0.422        | 3.065537e-50 | 19  |
| 2.715114e-54 | MINOS1 LZ    | 0.501282 0.955 | 0.744 | 4.840777e-50 | 19           |     |
| 3.812002e-54 | HSP90AA1 LZ  | 0.5141164      | 0.61  | 0.298        | 6.796419e-50 | 19  |
| 4.290147e-54 | ODC1 LZ      | 0.6166891      | 0.736 | 0.352        | 7.648903e-50 | 19  |
| 7.360347e-54 | TMEM243 LZ   | 0.4610474      | 0.917 | 0.635        | 1.312276e-49 | 19  |
| 8.897834e-54 | ATP5MD LZ    | 0.7535104      | 0.698 | 0.292        | 1.586395e-49 | 19  |
| 1.756616e-53 | TCF4 LZ      | 0.549826 0.464 | 0.179 | 3.131871e-49 | 19           | BID |
| 1.824586e-53 | LZ           | 0.5017605      | 0.8   | 0.47         | 3.253054e-49 | 19  |
| 1.951285e-53 | PRELID1 LZ   | 0.5262636      | 0.818 | 0.492        | 3.478946e-49 | 19  |
| 4.223399e-53 | COX5A LZ     | 0.5531934      | 0.294 | 0.059        | 7.529899e-49 | 19  |
| 4.347925e-53 | PTPRE LZ     | 0.5940531      | 0.787 | 0.43         | 7.751915e-49 | 19  |
| 1.311013e-52 | ROM01 LZ     | 0.6844397      | 0.313 | 0.069        | 2.337405e-48 | 19  |
| 1.357188e-52 | LINC01857 LZ | 0.5699103      | 0.32  | 0.057        | 2.41973e-48  | 19  |
| 2.620073e-52 | DCAF12 LZ    | 0.6360101      | 0.717 | 0.396        | 4.671329e-48 | 19  |
| 2.895587e-52 | RPL22L1 LZ   | 0.5723408      | 0.565 | 0.229        | 5.162543e-48 | 19  |
| 4.850316e-52 | MRPL27 LZ    | 0.4255457      | 0.211 | 0.031        | 8.647628e-48 | 19  |
| 8.066349e-52 | PDGFD LZ     | 0.6474006      | 0.435 | 0.141        | 1.438149e-47 | 19  |
| 8.851857e-52 | TYW3 LZ      | 0.5979437      | 0.691 | 0.314        | 1.578198e-47 | 19  |
| 9.885949e-52 | AP3S1 LZ     | 0.3969046      | 0.922 | 0.7          | 1.762566e-47 | 19  |
| 1.269496e-51 | TPI1 LZ      | 0.6389177      | 0.42  | 0.119        | 2.263385e-47 | 19  |
| 1.780779e-51 | DLAT LZ      | 0.5407041      | 0.424 | 0.137        | 3.17495e-47  | 19  |
| 2.36508e-51  | FAM207A LZ   | 0.6102532      | 0.905 | 0.6          | 4.216702e-47 | 19  |
| 2.576986e-51 | DYNLL1 LZ    | 0.5313413      | 0.874 | 0.573        | 4.594508e-47 | 19  |
| 3.690146e-51 | POU2F2 LZ    | -0.6431011     | 1     | 0.999        | 6.579161e-47 | 19  |
| 9.209809e-51 | RPS29 LZ     | 0.6527313      | 0.552 | 0.236        | 1.642017e-46 | 19  |

|              |             |           |       |       |              |    |
|--------------|-------------|-----------|-------|-------|--------------|----|
| 1.017639e-50 | RGS1 LZ     | 0.5903672 | 0.74  | 0.378 | 1.814348e-46 | 19 |
| 1.312914e-50 | SMARCB1 LZ  | 0.5751877 | 0.582 | 0.259 | 2.340793e-46 | 19 |
| 1.830826e-50 | VASP LZ     | 0.6730488 | 0.471 | 0.135 | 3.26418e-46  | 19 |
| 2.911285e-50 | MKNK2 LZ    | 0.3941763 | 0.801 | 0.493 | 5.19053e-46  | 19 |
| 4.952035e-50 | TUFM LZ     | 0.6349626 | 0.684 | 0.282 | 8.828984e-46 | 19 |
| 5.031277e-50 | BCAS4 LZ    | 0.5113588 | 0.4   | 0.131 | 8.970264e-46 | 19 |
| 5.100897e-50 | RRP1 LZ     | 0.4787121 | 0.747 | 0.429 | 9.09439e-46  | 19 |
| 3.089421e-49 | EIF5B LZ    | 0.463568  | 0.793 | 0.493 | 5.508129e-45 | 19 |
| 3.158744e-49 | HSPE1 LZ    | 0.5622458 | 0.666 | 0.278 | 5.631725e-45 | 19 |
| 4.157111e-49 | CD82 LZ     | 0.394715  | 0.82  | 0.512 | 7.411714e-45 | 19 |
| 4.190139e-49 | EIF3G LZ    | 0.5196788 | 0.508 | 0.213 | 7.4706e-45   | 19 |
| 4.556784e-49 | MRPL12 LZ   | 0.4467633 | 0.677 | 0.357 | 8.124291e-45 | 19 |
| 6.001609e-49 | HSPA9 LZ    | 0.8493261 | 0.536 | 0.18  | 1.070027e-44 | 19 |
| 6.326084e-49 | RGS2 LZ     | -1.34506  | 0.303 | 0.547 | 1.127877e-44 | 19 |
| 6.562393e-49 | CCR7 LZ     | 0.4175788 | 0.817 | 0.509 | 1.170009e-44 | 19 |
| 8.371061e-49 | SSBP1 LZ    | 0.6126592 | 0.434 | 0.137 | 1.492477e-44 | 19 |
| 9.139071e-49 | IN080C LZ   | -1.135714 | 0.124 | 0.354 | 1.629405e-44 | 19 |
| 1.210655e-48 | LY6E LZ     | 0.6568949 | 0.899 | 0.649 | 2.158477e-44 | 19 |
| 1.279241e-48 | HLA-DQA1 LZ | 0.4072676 | 0.923 | 0.652 | 2.28076e-44  | 19 |
| 4.899597e-48 | PSMB1 LZ    | 0.4952335 | 0.733 | 0.397 | 8.735492e-44 | 19 |
| 5.208102e-48 | MDH2 LZ     | 0.8464547 | 0.789 | 0.39  | 9.285526e-44 | 19 |
| 7.199306e-48 | CSTB LZ     | 0.5129691 | 0.41  | 0.151 | 1.283564e-43 | 19 |
| 8.981596e-48 | PAICS LZ    | 0.4187404 | 0.945 | 0.692 | 1.601329e-43 | 19 |
| 1.724685e-47 | ATP5MPL LZ  | 0.7448431 | 0.919 | 0.651 | 3.074941e-43 | 19 |
| 2.266641e-47 | TCL1A LZ    | 0.53717   | 0.285 | 0.062 | 4.041195e-43 | 19 |

|              |         |            |       |       |              |    |
|--------------|---------|------------|-------|-------|--------------|----|
| QPCT         | LZ      |            |       |       |              |    |
| 2.794234e-47 |         | 0.5189655  | 0.483 | 0.178 | 4.981839e-43 | 19 |
|              | ZNF593  | LZ         |       |       |              |    |
| 2.801471e-47 |         | 0.5123676  | 0.442 | 0.157 | 4.994743e-43 | 19 |
|              | WDR77   | LZ         |       |       |              |    |
| 3.814135e-47 |         | -0.9366216 | 0.978 | 0.976 | 6.800222e-43 | 19 |
|              | FTH1    | LZ         |       |       |              |    |
| 4.467183e-47 |         | 0.4723717  | 0.808 | 0.485 | 7.96454e-43  | 19 |
|              | CCT8    | LZ         |       |       |              |    |
| 9.354104e-47 |         | 0.4901689  | 0.808 | 0.46  | 1.667743e-42 | 19 |
|              | PRDX6   | LZ         |       |       |              |    |
| 2.315799e-46 |         | 0.436126   | 0.993 | 0.849 | 4.128838e-42 | 19 |
| ATP5MG       | LZ      |            |       |       |              |    |
| 2.662051e-46 |         | 0.5176367  | 0.701 | 0.355 | 4.746171e-42 | 19 |
|              | TKT     | LZ         |       |       |              |    |
| 2.91772e-46  |         | 0.6052512  | 0.958 | 0.721 | 5.202002e-42 | 19 |
|              | LIMD2   | LZ         |       |       |              |    |
| 3.073165e-46 |         | 0.5145854  | 0.684 | 0.318 | 5.479146e-42 | 19 |
|              | IMP4    | LZ         |       |       |              |    |
| 3.508966e-46 |         | 0.5865198  | 0.508 | 0.173 | 6.256135e-42 | 19 |
|              | MTERF4  | LZ         |       |       |              |    |
| 3.717992e-46 |         | 0.3893522  | 0.773 | 0.475 | 6.628808e-42 | 19 |
|              | RSL1D1  | LZ         |       |       |              |    |
| 3.999838e-46 |         | 0.426784   | 0.985 | 0.868 | 7.131311e-42 | 19 |
| ARPC3        | LZ      |            |       |       |              |    |
| 4.132905e-46 |         | 0.4377463  | 0.947 | 0.703 | 7.368557e-42 | 19 |
|              | NDUFA4  | LZ         |       |       |              |    |
| 4.148304e-46 |         | 0.4217124  | 0.173 | 0.016 | 7.396011e-42 | 19 |
|              | ZNF804A | LZ         |       |       |              |    |
| 4.801638e-46 |         | -0.9827884 | 0.123 | 0.276 | 8.56084e-42  | 19 |
|              | KLF2    | LZ         |       |       |              |    |
| 4.987449e-46 |         | 0.4878136  | 0.751 | 0.425 | 8.892123e-42 | 19 |
|              | SLIRP   | LZ         |       |       |              |    |
| 6.925483e-46 |         | 0.514885   | 0.607 | 0.266 | 1.234744e-41 | 19 |
| MRPL54       | LZ      |            |       |       |              |    |
| 7.575456e-46 |         | 0.4571779  | 0.811 | 0.48  | 1.350628e-41 | 19 |
|              | UBE2L3  | LZ         |       |       |              |    |
| 9.419163e-46 |         | 0.421922   | 0.985 | 0.811 | 1.679343e-41 | 19 |
| COR01A       | LZ      |            |       |       |              |    |
| 1.004325e-45 |         | 0.5519818  | 0.551 | 0.224 | 1.790611e-41 | 19 |
|              | NGLY1   | LZ         |       |       |              |    |
| 1.045235e-45 |         | 0.4185444  | 0.923 | 0.649 | 1.86355e-41  | 19 |
|              | ATP5F1A | LZ         |       |       |              |    |
| 1.372239e-45 |         | 0.4799997  | 0.59  | 0.283 | 2.446566e-41 | 19 |
|              | MRPL14  | LZ         |       |       |              |    |
| 1.586769e-45 |         | 0.6477323  | 0.982 | 0.8   | 2.82905e-41  | 19 |
|              | RPS26   | LZ         |       |       |              |    |
| 2.46442e-45  |         | -1.196838  | 0.131 | 0.356 | 4.393815e-41 | 19 |
|              | TXNIP   | LZ         |       |       |              |    |
| 6.031276e-45 |         | 0.440911   | 0.871 | 0.579 | 1.075316e-40 | 19 |

|              |           |       |       |              |    |  |
|--------------|-----------|-------|-------|--------------|----|--|
| NDUFB2       | LZ        |       |       |              |    |  |
| 6.256162e-45 | 0.3278976 | 0.99  | 0.894 | 1.115411e-40 | 19 |  |
|              | SLC25A6   | LZ    |       |              |    |  |
| 6.762749e-45 | 0.4522796 | 0.712 | 0.384 | 1.205731e-40 | 19 |  |
|              | NOL7      | LZ    |       |              |    |  |
| 8.899149e-45 | 0.4757851 | 0.47  | 0.194 | 1.586629e-40 | 19 |  |
|              | EBNA1BP2  | LZ    |       |              |    |  |
| 1.308471e-44 | 0.4118585 | 0.699 | 0.388 | 2.332873e-40 | 19 |  |
|              | PHB       | LZ    |       |              |    |  |
| 1.331722e-44 | 0.5650905 | 0.834 | 0.486 | 2.374327e-40 | 19 |  |
|              | RAC2      | LZ    |       |              |    |  |
| 1.472928e-44 | 0.5438253 | 0.681 | 0.317 | 2.626083e-40 | 19 |  |
|              | HSBP1     | LZ    |       |              |    |  |
| 3.346433e-44 | 0.5021545 | 0.538 | 0.241 | 5.966356e-40 | 19 |  |
|              | AK2       | LZ    |       |              |    |  |
| 3.993879e-44 | 0.6400195 | 0.243 | 0.052 | 7.120687e-40 | 19 |  |
|              | HES1      | LZ    |       |              |    |  |
| 5.585247e-44 | 0.7381189 | 0.548 | 0.205 | 9.957937e-40 | 19 |  |
|              | ADA       | LZ    |       |              |    |  |
| 6.212092e-44 | 0.4497919 | 0.853 | 0.528 | 1.107554e-39 | 19 |  |
|              | SNRPB2    | LZ    |       |              |    |  |
| 1.35108e-43  | 0.5149379 | 0.548 | 0.247 | 2.40884e-39  | 19 |  |
|              | DNPH1     | LZ    |       |              |    |  |
| 1.541228e-43 | 0.6544861 | 0.415 | 0.092 | 2.747855e-39 | 19 |  |
|              | FCRL3     | LZ    |       |              |    |  |
| 1.862387e-43 | 0.5562585 | 0.303 | 0.074 | 3.320449e-39 | 19 |  |
|              | KLHL6     | LZ    |       |              |    |  |
| 3.144491e-43 | 0.4328759 | 0.245 | 0.046 | 5.606313e-39 | 19 |  |
|              | PLK3      | LZ    |       |              |    |  |
| 3.899778e-43 | 0.4330893 | 0.515 | 0.221 | 6.952914e-39 | 19 |  |
|              | DCAF13    | LZ    |       |              |    |  |
| 6.475623e-43 | 0.4062494 | 0.931 | 0.643 | 1.154539e-38 | 19 |  |
|              | UQCR11    | LZ    |       |              |    |  |
| 2.09727e-42  | 0.4458323 | 0.929 | 0.695 | 3.739223e-38 | 19 |  |
|              | CCNI      | LZ    |       |              |    |  |
| 2.384712e-42 | 0.4142604 | 0.757 | 0.444 | 4.251703e-38 | 19 |  |
|              | ILF2      | LZ    |       |              |    |  |
| 2.452179e-42 | 0.4461179 | 0.552 | 0.255 | 4.37199e-38  | 19 |  |
|              | AK6       | LZ    |       |              |    |  |
| 2.483371e-42 | 0.4937899 | 0.745 | 0.409 | 4.427601e-38 | 19 |  |
|              | HDAC1     | LZ    |       |              |    |  |
| 2.714729e-42 | 0.4448814 | 0.571 | 0.249 | 4.84009e-38  | 19 |  |
|              | DTNBP1    | LZ    |       |              |    |  |
| 3.618345e-42 | 0.441082  | 0.73  | 0.399 | 6.451147e-38 | 19 |  |
|              | PSMB2     | LZ    |       |              |    |  |
| 4.304407e-42 | 0.4676944 | 0.745 | 0.415 | 7.674327e-38 | 19 |  |
|              | FAM49B    | LZ    |       |              |    |  |
| 4.788534e-42 | 0.399053  | 0.924 | 0.671 | 8.537477e-38 | 19 |  |
|              | ATP5ME    | LZ    |       |              |    |  |
| 5.402241e-42 | 0.5047004 | 0.569 | 0.261 | 9.631656e-38 | 19 |  |

|              |           |       |       |              |    |  |
|--------------|-----------|-------|-------|--------------|----|--|
| MTCH2        | LZ        |       |       |              |    |  |
| 7.001534e-42 | 0.4319717 | 0.171 | 0.018 | 1.248303e-37 | 19 |  |
| BACE2        | LZ        |       |       |              |    |  |
| 9.951355e-42 | 0.4338621 | 0.407 | 0.159 | 1.774227e-37 | 19 |  |
| MRT04        | LZ        |       |       |              |    |  |
| 1.11628e-41  | 0.4544098 | 0.143 | 0.019 | 1.990216e-37 | 19 |  |
| CCL22        | LZ        |       |       |              |    |  |
| 1.206207e-41 | 0.528837  | 0.572 | 0.263 | 2.150547e-37 | 19 |  |
| PPP1R2       | LZ        |       |       |              |    |  |
| 1.55064e-41  | 0.4277134 | 0.529 | 0.217 | 2.764636e-37 | 19 |  |
| MRPL4        | LZ        |       |       |              |    |  |
| 1.583307e-41 | 0.4507765 | 0.394 | 0.13  | 2.822878e-37 | 19 |  |
| EXOSC7       | LZ        |       |       |              |    |  |
| 1.753628e-41 | 0.4843471 | 0.547 | 0.252 | 3.126543e-37 | 19 |  |
| GSPT1        | LZ        |       |       |              |    |  |
| 2.348156e-41 | 0.4769449 | 0.745 | 0.426 | 4.186527e-37 | 19 |  |
| ZNF706       | LZ        |       |       |              |    |  |
| 2.612875e-41 | 0.4986753 | 0.448 | 0.183 | 4.658495e-37 | 19 |  |
| PDHA1        | LZ        |       |       |              |    |  |
| 3.678333e-41 | 0.4780828 | 0.524 | 0.242 | 6.558099e-37 | 19 |  |
| DKC1         | LZ        |       |       |              |    |  |
| 3.726941e-41 | 0.3801002 | 0.877 | 0.613 | 6.644763e-37 | 19 |  |
| NDUFA13      | LZ        |       |       |              |    |  |
| 3.739338e-41 | 0.4371154 | 0.701 | 0.36  | 6.666866e-37 | 19 |  |
| POLR2E       | LZ        |       |       |              |    |  |
| 4.868745e-41 | 0.370932  | 0.759 | 0.455 | 8.680486e-37 | 19 |  |
| GADD45GIP1   | LZ        |       |       |              |    |  |
| 6.668452e-41 | 0.7072856 | 0.425 | 0.105 | 1.188918e-36 | 19 |  |
| CD9          | LZ        |       |       |              |    |  |
| 7.487926e-41 | 0.5589039 | 0.669 | 0.33  | 1.335022e-36 | 19 |  |
| ANXA11       | LZ        |       |       |              |    |  |
| 1.053212e-40 | 0.3847755 | 0.997 | 0.938 | 1.877772e-36 | 19 |  |
| H3F3A        | LZ        |       |       |              |    |  |
| 1.333177e-40 | 0.400437  | 0.859 | 0.551 | 2.376921e-36 | 19 |  |
| SNU13        | LZ        |       |       |              |    |  |
| 1.472833e-40 | 0.4000634 | 0.87  | 0.562 | 2.625914e-36 | 19 |  |
| UOCRQ        | LZ        |       |       |              |    |  |
| 2.677701e-40 | 0.6070952 | 0.382 | 0.107 | 4.774074e-36 | 19 |  |
| AC023590.1   | LZ        |       |       |              |    |  |
| 2.863919e-40 | 0.3276654 | 0.877 | 0.59  | 5.106082e-36 | 19 |  |
| SRSF2        | LZ        |       |       |              |    |  |
| 2.996918e-40 | 0.4072612 | 0.871 | 0.549 | 5.343206e-36 | 19 |  |
| SEC61G       | LZ        |       |       |              |    |  |
| 4.660148e-40 | 0.4666881 | 0.533 | 0.233 | 8.308579e-36 | 19 |  |
| AMD1         | LZ        |       |       |              |    |  |
| 5.827814e-40 | 0.5085939 | 0.343 | 0.104 | 1.039041e-35 | 19 |  |
| PHF6         | LZ        |       |       |              |    |  |
| 6.025296e-40 | 0.4062159 | 0.585 | 0.285 | 1.07425e-35  | 19 |  |
| DCTPP1       | LZ        |       |       |              |    |  |
| 6.351524e-40 | 0.5355259 | 0.306 | 0.074 | 1.132413e-35 | 19 |  |

|              |            |       |       |              |    |  |
|--------------|------------|-------|-------|--------------|----|--|
| CRYZ         | LZ         |       |       |              |    |  |
| 7.114472e-40 | 0.4588563  | 0.703 | 0.383 | 1.268439e-35 | 19 |  |
| MRPL20       | LZ         |       |       |              |    |  |
| 8.272728e-40 | -0.7068716 | 0.999 | 1     | 1.474945e-35 | 19 |  |
| MALAT1       | LZ         |       |       |              |    |  |
| 8.502056e-40 | 0.5376033  | 0.498 | 0.183 | 1.515832e-35 | 19 |  |
| PRPSAP2      | LZ         |       |       |              |    |  |
| 1.302554e-39 | 0.6280658  | 0.592 | 0.231 | 2.322323e-35 | 19 |  |
| GCHFR        | LZ         |       |       |              |    |  |
| 1.376669e-39 | 0.4068376  | 0.299 | 0.098 | 2.454464e-35 | 19 |  |
| BOP1         | LZ         |       |       |              |    |  |
| 1.504354e-39 | 0.3416455  | 0.989 | 0.937 | 2.682112e-35 | 19 |  |
| EEF2         | LZ         |       |       |              |    |  |
| 1.575386e-39 | 0.3104417  | 0.994 | 0.918 | 2.808756e-35 | 19 |  |
| CFL1         | LZ         |       |       |              |    |  |
| 1.718451e-39 | 0.3524091  | 0.89  | 0.637 | 3.063827e-35 | 19 |  |
| HNRNPM       | LZ         |       |       |              |    |  |
| 1.763114e-39 | 0.3689165  | 0.818 | 0.505 | 3.143455e-35 | 19 |  |
| PSMD8        | LZ         |       |       |              |    |  |
| 1.803076e-39 | 0.4735824  | 0.578 | 0.258 | 3.214705e-35 | 19 |  |
| THOC7        | LZ         |       |       |              |    |  |
| 2.186174e-39 | 0.4464973  | 0.863 | 0.529 | 3.89773e-35  | 19 |  |
| SRSF9        | LZ         |       |       |              |    |  |
| 2.188282e-39 | 0.4537434  | 0.243 | 0.06  | 3.901488e-35 | 19 |  |
| BCL2L1       | LZ         |       |       |              |    |  |
| 3.261074e-39 | 0.568878   | 0.947 | 0.675 | 5.81417e-35  | 19 |  |
| HLA-DMA      | LZ         |       |       |              |    |  |
| 4.250102e-39 | 0.4594575  | 0.368 | 0.125 | 7.577507e-35 | 19 |  |
| EIF3B        | LZ         |       |       |              |    |  |
| 4.625738e-39 | 0.3507416  | 0.743 | 0.448 | 8.247228e-35 | 19 |  |
| VDAC1        | LZ         |       |       |              |    |  |
| 4.830688e-39 | -1.066415  | 0.379 | 0.514 | 8.612633e-35 | 19 |  |
| BANK1        | LZ         |       |       |              |    |  |
| 5.362384e-39 | 0.3929607  | 0.199 | 0.031 | 9.560595e-35 | 19 |  |
| CTPS2        | LZ         |       |       |              |    |  |
| 5.396418e-39 | 0.4104583  | 0.817 | 0.518 | 9.621273e-35 | 19 |  |
| SELENOT      | LZ         |       |       |              |    |  |
| 8.765185e-39 | 0.4268464  | 0.484 | 0.198 | 1.562745e-34 | 19 |  |
| MAP2K3       | LZ         |       |       |              |    |  |
| 1.053852e-38 | 0.389277   | 0.793 | 0.498 | 1.878913e-34 | 19 |  |
| NDUFA11      | LZ         |       |       |              |    |  |
| 1.167381e-38 | 0.5613991  | 0.249 | 0.055 | 2.081323e-34 | 19 |  |
| RGS16        | LZ         |       |       |              |    |  |
| 1.341581e-38 | 0.3486036  | 0.92  | 0.641 | 2.391904e-34 | 19 |  |
| SNRPG        | LZ         |       |       |              |    |  |
| 1.979442e-38 | 0.4529718  | 0.786 | 0.446 | 3.529146e-34 | 19 |  |
| MRPL51       | LZ         |       |       |              |    |  |
| 2.140979e-38 | 0.4137807  | 0.829 | 0.529 | 3.817151e-34 | 19 |  |
| SOD1         | LZ         |       |       |              |    |  |
| 2.155152e-38 | 0.4106577  | 0.761 | 0.441 | 3.842421e-34 | 19 |  |

|              |                |       |              |              |    |  |
|--------------|----------------|-------|--------------|--------------|----|--|
| PSMB7        | LZ             |       |              |              |    |  |
| 2.235037e-38 | 0.5087026      | 0.962 | 0.759        | 3.984848e-34 | 19 |  |
| CYBA         | LZ             |       |              |              |    |  |
| 2.261749e-38 | 0.4103543      | 0.572 | 0.313        | 4.032472e-34 | 19 |  |
| DDX21        | LZ             |       |              |              |    |  |
| 2.601028e-38 | 0.5821796      | 0.582 | 0.272        | 4.637374e-34 | 19 |  |
| PIM2         | LZ             |       |              |              |    |  |
| 2.6029e-38   | 0.3400802      | 0.18  | 0.033        | 4.64071e-34  | 19 |  |
| NDFIP2       | LZ             |       |              |              |    |  |
| 3.179989e-38 | 0.3494685      | 0.726 | 0.415        | 5.669602e-34 | 19 |  |
| EIF6         | LZ             |       |              |              |    |  |
| 4.25264e-38  | 0.3149691      | 0.999 | 0.99         | 7.582033e-34 | 19 |  |
| ACTB         | LZ             |       |              |              |    |  |
| 4.394817e-38 | 0.44829 0.544  | 0.235 | 7.83552e-34  | 19           |    |  |
| PRKRA        | LZ             |       |              |              |    |  |
| 6.830549e-38 | 0.3891202      | 0.747 | 0.439        | 1.217819e-33 | 19 |  |
| CCT7         | LZ             |       |              |              |    |  |
| 8.616587e-38 | 0.4056474      | 0.592 | 0.297        | 1.536251e-33 | 19 |  |
| NOP58        | LZ             |       |              |              |    |  |
| 9.819613e-38 | 0.5661151      | 0.427 | 0.147        | 1.750739e-33 | 19 |  |
| CLECL1       | LZ             |       |              |              |    |  |
| 1.073311e-37 | 0.404253 0.799 | 0.472 | 1.913606e-33 | 19           |    |  |
| UBE2N        | LZ             |       |              |              |    |  |
| 1.113646e-37 | 0.3937561      | 0.759 | 0.435        | 1.98552e-33  | 19 |  |
| AURKAIP1     | LZ             |       |              |              |    |  |
| 1.124358e-37 | -0.8451735     | 0.253 | 0.408        | 2.004617e-33 | 19 |  |
| SMIM14       | LZ             |       |              |              |    |  |
| 1.155507e-37 | 0.3656617      | 0.954 | 0.731        | 2.060153e-33 | 19 |  |
| SKP1         | LZ             |       |              |              |    |  |
| 1.173925e-37 | 0.4545594      | 0.399 | 0.137        | 2.09299e-33  | 19 |  |
| CISD1        | LZ             |       |              |              |    |  |
| 1.314339e-37 | 0.3637217      | 0.916 | 0.636        | 2.343335e-33 | 19 |  |
| ATP5MF       | LZ             |       |              |              |    |  |
| 2.144346e-37 | 0.4473658      | 0.234 | 0.041        | 3.823154e-33 | 19 |  |
| IZUM04       | LZ             |       |              |              |    |  |
| 2.361608e-37 | 0.4308046      | 0.375 | 0.129        | 4.21051e-33  | 19 |  |
| PRKCD        | LZ             |       |              |              |    |  |
| 3.688497e-37 | 0.4393657      | 0.424 | 0.158        | 6.576221e-33 | 19 |  |
| EI24         | LZ             |       |              |              |    |  |
| 3.737493e-37 | 0.3900653      | 0.621 | 0.32         | 6.663577e-33 | 19 |  |
| PUF60        | LZ             |       |              |              |    |  |
| 4.011873e-37 | 0.4109558      | 0.832 | 0.511        | 7.152769e-33 | 19 |  |
| SMDT1        | LZ             |       |              |              |    |  |
| 4.203164e-37 | 0.4587493      | 0.768 | 0.441        | 7.493822e-33 | 19 |  |
| ATP5F1C      | LZ             |       |              |              |    |  |
| 5.107965e-37 | 0.4620714      | 0.352 | 0.105        | 9.106992e-33 | 19 |  |
| NADK         | LZ             |       |              |              |    |  |
| 8.09384e-37  | 0.4237502      | 0.586 | 0.282        | 1.443051e-32 | 19 |  |
| MRPS15       | LZ             |       |              |              |    |  |
| 8.501458e-37 | 0.3922704      | 0.807 | 0.493        | 1.515725e-32 | 19 |  |



|              |                |       |       |              |    |  |
|--------------|----------------|-------|-------|--------------|----|--|
|              | C19orf53 LZ    |       |       |              |    |  |
| 1.053702e-36 | 0.4079977      | 0.759 | 0.412 | 1.878645e-32 | 19 |  |
|              | METAP2 LZ      |       |       |              |    |  |
| 1.683249e-36 | 0.4552268      | 0.488 | 0.2   | 3.001065e-32 | 19 |  |
|              | MTMR14 LZ      |       |       |              |    |  |
| 1.683422e-36 | 0.3658309      | 0.899 | 0.641 | 3.001374e-32 | 19 |  |
|              | HNRNPC LZ      |       |       |              |    |  |
| 2.732329e-36 | 0.4368744      | 0.621 | 0.299 | 4.871469e-32 | 19 |  |
|              | CHMP2A LZ      |       |       |              |    |  |
| 2.931087e-36 | 0.4070674      | 0.508 | 0.232 | 5.225836e-32 | 19 |  |
|              | NIFK LZ        |       |       |              |    |  |
| 3.370496e-36 | 0.331434 0.92  | 0.694 |       | 6.009258e-32 | 19 |  |
|              | RHOA LZ        |       |       |              |    |  |
| 3.370535e-36 | 0.483223 0.39  | 0.134 |       | 6.009327e-32 | 19 |  |
|              | RPA1 LZ        |       |       |              |    |  |
| 7.859936e-36 | 0.3963001      | 0.748 | 0.422 | 1.401348e-31 | 19 |  |
|              | ANP32A LZ      |       |       |              |    |  |
| 7.969921e-36 | 0.3644491      | 0.449 | 0.192 | 1.420957e-31 | 19 |  |
|              | GTPBP4 LZ      |       |       |              |    |  |
| 8.502975e-36 | 0.5091361      | 0.4   | 0.138 | 1.515995e-31 | 19 |  |
|              | WDR18 LZ       |       |       |              |    |  |
| 9.220142e-36 | 0.552018 0.466 | 0.173 |       | 1.643859e-31 | 19 |  |
|              | PLIN3 LZ       |       |       |              |    |  |
| 1.047038e-35 | 0.3717599      | 0.618 | 0.315 | 1.866764e-31 | 19 |  |
|              | RHOG LZ        |       |       |              |    |  |
| 1.066429e-35 | 0.3427169      | 0.737 | 0.415 | 1.901335e-31 | 19 |  |
|              | ADRM1 LZ       |       |       |              |    |  |
| 1.132058e-35 | 0.4242108      | 0.48  | 0.191 | 2.018347e-31 | 19 |  |
|              | GRSF1 LZ       |       |       |              |    |  |
| 1.252083e-35 | 0.4693053      | 0.196 | 0.038 | 2.232339e-31 | 19 |  |
|              | EGR2 LZ        |       |       |              |    |  |
| 1.737891e-35 | 0.501289 0.371 | 0.127 |       | 3.098485e-31 | 19 |  |
|              | PHGDH LZ       |       |       |              |    |  |
| 2.174062e-35 | 0.3894761      | 0.312 | 0.101 | 3.876136e-31 | 19 |  |
|              | LPCAT1 LZ      |       |       |              |    |  |
| 2.650515e-35 | 0.4609527      | 0.434 | 0.164 | 4.725603e-31 | 19 |  |
|              | CFAP298 LZ     |       |       |              |    |  |
| 3.791303e-35 | 0.400816 0.811 | 0.497 |       | 6.759514e-31 | 19 |  |
|              | RTRAF LZ       |       |       |              |    |  |
| 4.273898e-35 | 0.445489 0.344 | 0.113 |       | 7.619933e-31 | 19 |  |
|              | EHD4 LZ        |       |       |              |    |  |
| 4.968291e-35 | 0.4077937      | 0.571 | 0.271 | 8.857965e-31 | 19 |  |
|              | ATOX1 LZ       |       |       |              |    |  |
| 6.399974e-35 | 0.3958533      | 0.695 | 0.39  | 1.141051e-30 | 19 |  |
|              | NDUFAB1 LZ     |       |       |              |    |  |
| 7.430218e-35 | 0.4282817      | 0.218 | 0.048 | 1.324734e-30 | 19 |  |
|              | UCHL1 LZ       |       |       |              |    |  |
| 9.519404e-35 | 0.3629585      | 0.484 | 0.23  | 1.697215e-30 | 19 |  |
|              | MTHFD2 LZ      |       |       |              |    |  |
| 1.02926e-34  | 0.397958 0.607 | 0.313 |       | 1.835068e-30 | 19 |  |

|              |           |       |       |              |    |  |
|--------------|-----------|-------|-------|--------------|----|--|
| GTF3C6       | LZ        |       |       |              |    |  |
| 1.574067e-34 | 0.4801021 | 0.769 | 0.423 | 2.806404e-30 | 19 |  |
|              | DNAJA1    | LZ    |       |              |    |  |
| 1.731668e-34 | 0.3517122 | 0.592 | 0.299 | 3.08739e-30  | 19 |  |
|              | GLRX3     | LZ    |       |              |    |  |
| 1.900995e-34 | 0.5039313 | 0.533 | 0.222 | 3.389285e-30 | 19 |  |
|              | NSMCE1    | LZ    |       |              |    |  |
| 3.316083e-34 | 0.4955916 | 0.583 | 0.265 | 5.912245e-30 | 19 |  |
|              | TOP1      | LZ    |       |              |    |  |
| 4.753045e-34 | 0.4123929 | 0.403 | 0.158 | 8.474204e-30 | 19 |  |
|              | DCUN1D5   | LZ    |       |              |    |  |
| 4.795976e-34 | 0.3043754 | 0.965 | 0.803 | 8.550746e-30 | 19 |  |
|              | HNRNPK    | LZ    |       |              |    |  |
| 5.210926e-34 | 0.3817325 | 0.578 | 0.29  | 9.290561e-30 | 19 |  |
|              | ILF3      | LZ    |       |              |    |  |
| 5.671013e-34 | 0.4131956 | 0.273 | 0.083 | 1.011085e-29 | 19 |  |
|              | EBI3      | LZ    |       |              |    |  |
| 7.363139e-34 | 0.4220329 | 0.509 | 0.211 | 1.312774e-29 | 19 |  |
|              | DMAC1     | LZ    |       |              |    |  |
| 7.692157e-34 | -1.120781 | 0.316 | 0.497 | 1.371435e-29 | 19 |  |
|              | FXVD5     | LZ    |       |              |    |  |
| 8.143576e-34 | 0.3907052 | 0.305 | 0.087 | 1.451918e-29 | 19 |  |
|              | MAP1S     | LZ    |       |              |    |  |
| 8.413751e-34 | 0.3418996 | 0.996 | 0.961 | 1.500088e-29 | 19 |  |
|              | OAZ1      | LZ    |       |              |    |  |
| 9.244641e-34 | 0.3809922 | 0.414 | 0.186 | 1.648227e-29 | 19 |  |
|              | ATP1A1    | LZ    |       |              |    |  |
| 1.069758e-33 | 0.3965961 | 0.343 | 0.121 | 1.907271e-29 | 19 |  |
|              | BZW2      | LZ    |       |              |    |  |
| 1.139967e-33 | 0.4206266 | 0.632 | 0.332 | 2.032448e-29 | 19 |  |
|              | PPM1G     | LZ    |       |              |    |  |
| 1.222041e-33 | 0.4152572 | 0.695 | 0.383 | 2.178777e-29 | 19 |  |
|              | NDUFS6    | LZ    |       |              |    |  |
| 1.436854e-33 | 0.4208304 | 0.769 | 0.455 | 2.561767e-29 | 19 |  |
|              | SWAP70    | LZ    |       |              |    |  |
| 1.844711e-33 | 0.4147034 | 0.262 | 0.059 | 3.288935e-29 | 19 |  |
|              | DTX1      | LZ    |       |              |    |  |
| 2.151217e-33 | 0.400603  | 0.894 | 0.665 | 3.835405e-29 | 19 |  |
|              | GDI2      | LZ    |       |              |    |  |
| 2.727059e-33 | 0.3481816 | 0.569 | 0.298 | 4.862073e-29 | 19 |  |
|              | ATP1B3    | LZ    |       |              |    |  |
| 2.821274e-33 | 0.3473559 | 0.635 | 0.335 | 5.030049e-29 | 19 |  |
|              | STRAP     | LZ    |       |              |    |  |
| 3.05205e-33  | 0.397913  | 0.497 | 0.229 | 5.441501e-29 | 19 |  |
|              | RALA      | LZ    |       |              |    |  |
| 4.676051e-33 | 0.5024289 | 0.862 | 0.694 | 8.336932e-29 | 19 |  |
|              | HLA-DQB1  | LZ    |       |              |    |  |
| 5.137151e-33 | 0.3962974 | 0.29  | 0.076 | 9.159027e-29 | 19 |  |
|              | MYO1E     | LZ    |       |              |    |  |
| 5.885829e-33 | 0.410516  | 0.813 | 0.525 | 1.049384e-28 | 19 |  |

|              |            |       |       |              |    |  |
|--------------|------------|-------|-------|--------------|----|--|
| SRSF7        | LZ         |       |       |              |    |  |
| 7.351369e-33 | 0.4242282  | 0.459 | 0.197 | 1.310676e-28 | 19 |  |
| RELB         | LZ         |       |       |              |    |  |
| 8.732795e-33 | 0.4495964  | 0.547 | 0.242 | 1.55697e-28  | 19 |  |
| TRAPPC2L     | LZ         |       |       |              |    |  |
| 9.150679e-33 | 0.4648833  | 0.559 | 0.263 | 1.631474e-28 | 19 |  |
| TXNDC17      | LZ         |       |       |              |    |  |
| 1.180401e-32 | 0.3868472  | 0.34  | 0.122 | 2.104537e-28 | 19 |  |
| ISOC2        | LZ         |       |       |              |    |  |
| 1.408192e-32 | 0.3237404  | 0.828 | 0.552 | 2.510666e-28 | 19 |  |
| PGK1         | LZ         |       |       |              |    |  |
| 1.539001e-32 | -0.8916905 | 0.164 | 0.299 | 2.743885e-28 | 19 |  |
| LINC00926    | LZ         |       |       |              |    |  |
| 1.671621e-32 | 0.4979059  | 0.71  | 0.376 | 2.980333e-28 | 19 |  |
| LSM8         | LZ         |       |       |              |    |  |
| 1.972025e-32 | 0.3543839  | 0.389 | 0.153 | 3.515924e-28 | 19 |  |
| GAR1         | LZ         |       |       |              |    |  |
| 2.278133e-32 | 0.5246114  | 0.467 | 0.176 | 4.061683e-28 | 19 |  |
| ZNF106       | LZ         |       |       |              |    |  |
| 2.566819e-32 | 0.3364741  | 0.859 | 0.597 | 4.576382e-28 | 19 |  |
| PSMA2        | LZ         |       |       |              |    |  |
| 2.701432e-32 | 0.3238711  | 0.719 | 0.44  | 4.816383e-28 | 19 |  |
| ATP5MC1      | LZ         |       |       |              |    |  |
| 3.066694e-32 | 0.424222   | 0.347 | 0.108 | 5.467609e-28 | 19 |  |
| TRAC         | LZ         |       |       |              |    |  |
| 5.019715e-32 | 0.3592561  | 0.329 | 0.117 | 8.94965e-28  | 19 |  |
| TRAP1        | LZ         |       |       |              |    |  |
| 6.226901e-32 | -0.8637085 | 0.147 | 0.27  | 1.110194e-27 | 19 |  |
| JUN          | LZ         |       |       |              |    |  |
| 7.664821e-32 | -0.9844022 | 0.077 | 0.271 | 1.366561e-27 | 19 |  |
| GPR183       | LZ         |       |       |              |    |  |
| 8.320023e-32 | 0.4081303  | 0.555 | 0.262 | 1.483377e-27 | 19 |  |
| PPP1R7       | LZ         |       |       |              |    |  |
| 8.505563e-32 | 0.3763386  | 0.476 | 0.219 | 1.516457e-27 | 19 |  |
| MRPS23       | LZ         |       |       |              |    |  |
| 9.42502e-32  | 0.4363607  | 0.611 | 0.311 | 1.680387e-27 | 19 |  |
| NDUFAF3      | LZ         |       |       |              |    |  |
| 9.846594e-32 | 0.3671921  | 0.327 | 0.114 | 1.755549e-27 | 19 |  |
| LYAR         | LZ         |       |       |              |    |  |
| 1.025834e-31 | 0.4356876  | 0.618 | 0.309 | 1.82896e-27  | 19 |  |
| LYN          | LZ         |       |       |              |    |  |
| 1.117695e-31 | 0.3252615  | 0.248 | 0.074 | 1.992739e-27 | 19 |  |
| RRP9         | LZ         |       |       |              |    |  |
| 1.183753e-31 | 0.3275796  | 0.783 | 0.484 | 2.110513e-27 | 19 |  |
| EIF3M        | LZ         |       |       |              |    |  |
| 1.349927e-31 | 0.3482389  | 0.754 | 0.464 | 2.406785e-27 | 19 |  |
| SNRPF        | LZ         |       |       |              |    |  |
| 1.462079e-31 | 0.408978   | 0.382 | 0.137 | 2.606741e-27 | 19 |  |
| TM2D3        | LZ         |       |       |              |    |  |
| 1.676016e-31 | 0.3343741  | 0.476 | 0.247 | 2.988169e-27 | 19 |  |

|              |                |       |              |              |    |  |
|--------------|----------------|-------|--------------|--------------|----|--|
| GARS         | LZ             |       |              |              |    |  |
| 1.710799e-31 | -0.9636837     | 0.383 | 0.525        | 3.050184e-27 | 19 |  |
| ID3          | LZ             |       |              |              |    |  |
| 2.082389e-31 | 0.3455081      | 0.744 | 0.441        | 3.712692e-27 | 19 |  |
| PGAM1        | LZ             |       |              |              |    |  |
| 2.290275e-31 | 0.3390484      | 0.467 | 0.224        | 4.083331e-27 | 19 |  |
| MRPL3        | LZ             |       |              |              |    |  |
| 2.573905e-31 | 0.3356649      | 0.227 | 0.07         | 4.589015e-27 | 19 |  |
| BYSL         | LZ             |       |              |              |    |  |
| 2.584497e-31 | 0.3325758      | 0.719 | 0.423        | 4.6079e-27   | 19 |  |
| PPP1R15A     | LZ             |       |              |              |    |  |
| 2.60754e-31  | 0.3469497      | 0.628 | 0.344        | 4.648983e-27 | 19 |  |
| CYC1         | LZ             |       |              |              |    |  |
| 2.704384e-31 | 0.4389637      | 0.576 | 0.265        | 4.821646e-27 | 19 |  |
| SEPT9        | LZ             |       |              |              |    |  |
| 3.777964e-31 | 0.4427736      | 0.552 | 0.261        | 6.735733e-27 | 19 |  |
| AIP          | LZ             |       |              |              |    |  |
| 3.800363e-31 | 0.3466062      | 0.359 | 0.153        | 6.775667e-27 | 19 |  |
| NAMPT        | LZ             |       |              |              |    |  |
| 5.248061e-31 | 0.4042513      | 0.421 | 0.205        | 9.356767e-27 | 19 |  |
| PIM3         | LZ             |       |              |              |    |  |
| 6.897338e-31 | 0.318917 0.801 | 0.515 | 1.229726e-26 | 19           |    |  |
| PSMB6        | LZ             |       |              |              |    |  |
| 9.092502e-31 | 0.4017959      | 0.417 | 0.169        | 1.621102e-26 | 19 |  |
| MRPL37       | LZ             |       |              |              |    |  |
| 1.35886e-30  | 0.338641 0.731 | 0.435 | 2.422712e-26 | 19           |    |  |
| HMGA1        | LZ             |       |              |              |    |  |
| 1.553739e-30 | 0.3789123      | 0.176 | 0.027        | 2.770162e-26 | 19 |  |
| FGD6         | LZ             |       |              |              |    |  |
| 1.820067e-30 | 0.3584684      | 0.578 | 0.286        | 3.244998e-26 | 19 |  |
| G3BP1        | LZ             |       |              |              |    |  |
| 2.272912e-30 | 0.3539859      | 0.691 | 0.403        | 4.052375e-26 | 19 |  |
| BANF1        | LZ             |       |              |              |    |  |
| 2.385333e-30 | 0.3292652      | 0.429 | 0.197        | 4.25281e-26  | 19 |  |
| TOMM40       | LZ             |       |              |              |    |  |
| 2.415539e-30 | 0.3918836      | 0.575 | 0.28         | 4.306664e-26 | 19 |  |
| RTF2         | LZ             |       |              |              |    |  |
| 2.44958e-30  | 0.3994811      | 0.738 | 0.414        | 4.367356e-26 | 19 |  |
| HNRNPD       | LZ             |       |              |              |    |  |
| 2.491838e-30 | 0.434169 0.566 | 0.256 | 4.442699e-26 | 19           |    |  |
| CCDC69       | LZ             |       |              |              |    |  |
| 3.55454e-30  | 0.411145 0.543 | 0.258 | 6.33739e-26  | 19           |    |  |
| ATXN10       | LZ             |       |              |              |    |  |
| 3.619841e-30 | 0.3757321      | 0.31  | 0.091        | 6.453815e-26 | 19 |  |
| PDLIM2       | LZ             |       |              |              |    |  |
| 3.73227e-30  | 0.3170059      | 0.603 | 0.34         | 6.654264e-26 | 19 |  |
| INSIG1       | LZ             |       |              |              |    |  |
| 4.498879e-30 | 0.3317291      | 0.28  | 0.085        | 8.021051e-26 | 19 |  |
| POLR1C       | LZ             |       |              |              |    |  |
| 5.324782e-30 | 0.3892481      | 0.628 | 0.34         | 9.493554e-26 | 19 |  |

|              |            |       |       |              |              |    |
|--------------|------------|-------|-------|--------------|--------------|----|
| MRPS34       | LZ         |       |       |              |              |    |
| 5.837561e-30 | 0.303539   | 0.796 | 0.51  | 1.040779e-25 | 19           |    |
| DNAJC8       | LZ         |       |       |              |              |    |
| 6.163331e-30 | 0.3622613  |       | 0.68  | 0.387        | 1.09886e-25  | 19 |
| SSB          | LZ         |       |       |              |              |    |
| 6.453157e-30 | -0.3796735 |       | 1     | 1            | 1.150533e-25 | 19 |
| RPL41        | LZ         |       |       |              |              |    |
| 7.384042e-30 | 0.3768753  |       | 0.389 | 0.156        | 1.316501e-25 | 19 |
| COA4         | LZ         |       |       |              |              |    |
| 7.680373e-30 | -0.7123023 |       | 0.063 | 0.197        | 1.369334e-25 | 19 |
| CLEC2B       | LZ         |       |       |              |              |    |
| 8.026779e-30 | 0.4908453  |       | 0.671 | 0.308        | 1.431094e-25 | 19 |
| HMG3         | LZ         |       |       |              |              |    |
| 1.0747e-29   | 0.3866696  |       | 0.652 | 0.341        | 1.916083e-25 | 19 |
| LSM6         | LZ         |       |       |              |              |    |
| 1.67212e-29  | 0.4021136  |       | 0.72  | 0.421        | 2.981223e-25 | 19 |
| CD40         | LZ         |       |       |              |              |    |
| 1.740425e-29 | 0.3425001  |       | 0.365 | 0.142        | 3.103003e-25 | 19 |
| ADSL         | LZ         |       |       |              |              |    |
| 1.953264e-29 | 0.3112066  |       | 0.284 | 0.098        | 3.482475e-25 | 19 |
| RRS1         | LZ         |       |       |              |              |    |
| 2.891211e-29 | 0.4340158  |       | 0.215 | 0.043        | 5.15474e-25  | 19 |
| EML6         | LZ         |       |       |              |              |    |
| 2.933872e-29 | 0.3878633  |       | 0.596 | 0.315        | 5.2308e-25   | 19 |
| PRDX2        | LZ         |       |       |              |              |    |
| 3.561331e-29 | 0.3866548  |       | 0.519 | 0.26         | 6.349497e-25 | 19 |
| SYNCRIP      | LZ         |       |       |              |              |    |
| 3.892213e-29 | 0.3303853  |       | 0.385 | 0.164        | 6.939426e-25 | 19 |
| SNHG15       | LZ         |       |       |              |              |    |
| 5.349632e-29 | 0.4665919  |       | 0.355 | 0.114        | 9.537858e-25 | 19 |
| TBC1D1       | LZ         |       |       |              |              |    |
| 6.559943e-29 | 0.3215485  |       | 0.733 | 0.444        | 1.169572e-24 | 19 |
| CSNK2B       | LZ         |       |       |              |              |    |
| 7.523575e-29 | 0.3074264  |       | 0.159 | 0.029        | 1.341378e-24 | 19 |
| MIR3681HG    | LZ         |       |       |              |              |    |
| 7.543028e-29 | 0.365844   | 0.559 | 0.279 | 1.344846e-24 | 19           |    |
| MRPS7        | LZ         |       |       |              |              |    |
| 7.841665e-29 | 0.3299389  |       | 0.754 | 0.473        | 1.39809e-24  | 19 |
| GRB2         | LZ         |       |       |              |              |    |
| 8.66471e-29  | 0.3804205  |       | 0.636 | 0.342        | 1.544831e-24 | 19 |
| UBE2A        | LZ         |       |       |              |              |    |
| 9.148158e-29 | 0.3172149  |       | 0.102 | 0.009        | 1.631025e-24 | 19 |
| RARRES2      | LZ         |       |       |              |              |    |
| 1.047603e-28 | 0.3223549  |       | 0.376 | 0.163        | 1.867772e-24 | 19 |
| ETF1         | LZ         |       |       |              |              |    |
| 1.274396e-28 | 0.3607541  |       | 0.632 | 0.333        | 2.272121e-24 | 19 |
| HSD17B10     | LZ         |       |       |              |              |    |
| 1.358247e-28 | 0.418779   | 0.313 | 0.085 | 2.421619e-24 | 19           |    |
| VEZT         | LZ         |       |       |              |              |    |
| 1.390471e-28 | 0.3322217  |       | 0.631 | 0.349        | 2.479071e-24 | 19 |

|              |             |            |       |       |              |    |
|--------------|-------------|------------|-------|-------|--------------|----|
| 1.406552e-28 | PHB2 LZ     | 0.3071676  | 0.839 | 0.623 | 2.507741e-24 | 19 |
| 1.496347e-28 | SELENOH LZ  | 0.3657142  | 0.369 | 0.14  | 2.667837e-24 | 19 |
| 1.588665e-28 | MPHOSPH6 LZ | 0.4276181  | 0.541 | 0.235 | 2.832432e-24 | 19 |
| 1.798905e-28 | PTRHD1 LZ   | 0.3730198  | 0.533 | 0.244 | 3.207267e-24 | 19 |
| 1.867157e-28 | MRPL13 LZ   | 0.3547366  | 0.657 | 0.362 | 3.328954e-24 | 19 |
| 2.488498e-28 | EWSR1 LZ    | 0.3085044  | 0.257 | 0.082 | 4.436744e-24 | 19 |
| 2.516501e-28 | EXOSC5 LZ   | 0.3884359  | 0.32  | 0.102 | 4.48667e-24  | 19 |
| 2.595256e-28 | ACSF3 LZ    | 0.300819   | 0.916 | 0.683 | 4.627082e-24 | 19 |
| 2.705783e-28 | PPP1CA LZ   | 0.3302372  | 0.621 | 0.328 | 4.824141e-24 | 19 |
| 2.967912e-28 | LSM2 LZ     | 0.3397753  | 0.523 | 0.274 | 5.29149e-24  | 19 |
| 3.624862e-28 | PHPT1 LZ    | 0.3584745  | 0.526 | 0.253 | 6.462766e-24 | 19 |
| 4.64106e-28  | CDV3 LZ     | 0.4037858  | 0.6   | 0.355 | 8.274546e-24 | 19 |
| 4.932442e-28 | BSG LZ      | 0.3870941  | 0.628 | 0.345 | 8.79405e-24  | 19 |
| 5.195793e-28 | PDIA6 LZ    | 0.3576404  | 0.866 | 0.615 | 9.26358e-24  | 19 |
| 6.695679e-28 | CLEC2D LZ   | 0.3114385  | 0.645 | 0.37  | 1.193773e-23 | 19 |
| 7.688654e-28 | PSMC3 LZ    | 0.3230538  | 0.797 | 0.513 | 1.37081e-23  | 19 |
| 7.752107e-28 | ATP5PB LZ   | 0.3223764  | 0.537 | 0.277 | 1.382123e-23 | 19 |
| 7.835314e-28 | PSMD14 LZ   | 0.3263712  | 0.887 | 0.61  | 1.396958e-23 | 19 |
| 8.816768e-28 | UQCR10 LZ   | 0.3402631  | 0.401 | 0.177 | 1.571941e-23 | 19 |
| 8.911214e-28 | FARSA LZ    | 0.3428086  | 0.185 | 0.038 | 1.58878e-23  | 19 |
| 1.069138e-27 | TESPA1 LZ   | 0.3519004  | 0.383 | 0.163 | 1.906167e-23 | 19 |
| 1.130632e-27 | PARL LZ     | 0.3677111  | 0.737 | 0.424 | 2.015805e-23 | 19 |
| 1.662861e-27 | IRF8 LZ     | -0.8699431 | 0.333 | 0.45  | 2.964715e-23 | 19 |
| 1.792531e-27 | PNRC1 LZ    | 0.3665646  | 0.327 | 0.132 | 3.195903e-23 | 19 |
| 1.97632e-27  | NDUFAF2 LZ  | 0.5625493  | 0.976 | 0.855 | 3.523581e-23 | 19 |

|              |                |       |              |              |    |  |
|--------------|----------------|-------|--------------|--------------|----|--|
| CD79B        | LZ             |       |              |              |    |  |
| 2.497808e-27 | 0.3636989      | 0.599 | 0.331        | 4.453342e-23 | 19 |  |
| VOPP1        | LZ             |       |              |              |    |  |
| 2.768449e-27 | 0.3332066      | 0.467 | 0.225        | 4.935868e-23 | 19 |  |
| NOB1         | LZ             |       |              |              |    |  |
| 2.892576e-27 | 0.3364166      | 0.422 | 0.186        | 5.157175e-23 | 19 |  |
| CHCHD3       | LZ             |       |              |              |    |  |
| 3.294447e-27 | 0.3687857      | 0.273 | 0.079        | 5.873669e-23 | 19 |  |
| COMMD10      | LZ             |       |              |              |    |  |
| 3.795884e-27 | 0.3183741      | 0.656 | 0.381        | 6.767682e-23 | 19 |  |
| SNRPC        | LZ             |       |              |              |    |  |
| 3.858762e-27 | 0.5079823      | 0.519 | 0.197        | 6.879788e-23 | 19 |  |
| HMCES        | LZ             |       |              |              |    |  |
| 4.128905e-27 | 0.3111196      | 0.462 | 0.231        | 7.361425e-23 | 19 |  |
| EIF4A1       | LZ             |       |              |              |    |  |
| 4.613899e-27 | 0.3370861      | 0.61  | 0.328        | 8.22612e-23  | 19 |  |
| STUB1        | LZ             |       |              |              |    |  |
| 4.974574e-27 | -0.8072437     | 0.246 | 0.349        | 8.869167e-23 | 19 |  |
| TRAF3IP3     | LZ             |       |              |              |    |  |
| 5.326136e-27 | 0.3566977      | 0.207 | 0.052        | 9.495968e-23 | 19 |  |
| BORCS8-MEF2B | LZ             |       |              |              |    |  |
| 6.805477e-27 | -0.8319748     | 0.067 | 0.222        | 1.213349e-22 | 19 |  |
| GBP2         | LZ             |       |              |              |    |  |
| 7.100823e-27 | 0.3095186      | 0.357 | 0.146        | 1.266006e-22 | 19 |  |
| RPF2         | LZ             |       |              |              |    |  |
| 1.086194e-26 | 0.3162352      | 0.895 | 0.63         | 1.936576e-22 | 19 |  |
| BRK1         | LZ             |       |              |              |    |  |
| 1.284075e-26 | 0.3891269      | 0.442 | 0.204        | 2.289378e-22 | 19 |  |
| GNL3         | LZ             |       |              |              |    |  |
| 1.524943e-26 | 0.4428453      | 0.548 | 0.222        | 2.718821e-22 | 19 |  |
| UBE2G1       | LZ             |       |              |              |    |  |
| 1.573429e-26 | 0.3846389      | 0.45  | 0.189        | 2.805266e-22 | 19 |  |
| REPIN1       | LZ             |       |              |              |    |  |
| 1.699764e-26 | 0.3035301      | 0.547 | 0.271        | 3.03051e-22  | 19 |  |
| MRPL47       | LZ             |       |              |              |    |  |
| 2.460252e-26 | 0.3466613      | 0.413 | 0.179        | 4.386383e-22 | 19 |  |
| TMA16        | LZ             |       |              |              |    |  |
| 2.652859e-26 | 0.3331837      | 0.652 | 0.375        | 4.729782e-22 | 19 |  |
| VDAC2        | LZ             |       |              |              |    |  |
| 2.686993e-26 | 0.3411445      | 0.614 | 0.344        | 4.790639e-22 | 19 |  |
| ZC3H15       | LZ             |       |              |              |    |  |
| 2.812721e-26 | 0.310733 0.664 | 0.38  | 5.014801e-22 | 19           |    |  |
| UQCRC2       | LZ             |       |              |              |    |  |
| 2.819181e-26 | 0.3146005      | 0.73  | 0.445        | 5.026318e-22 | 19 |  |
| SF3B5        | LZ             |       |              |              |    |  |
| 2.825305e-26 | 0.3255044      | 0.688 | 0.397        | 5.037237e-22 | 19 |  |
| UQCRCFS1     | LZ             |       |              |              |    |  |
| 2.93017e-26  | 0.3353056      | 0.523 | 0.247        | 5.224199e-22 | 19 |  |
| MCTS1        | LZ             |       |              |              |    |  |
| 3.058839e-26 | 0.3363873      | 0.336 | 0.13         | 5.453604e-22 | 19 |  |

|              |             |            |       |       |              |              |
|--------------|-------------|------------|-------|-------|--------------|--------------|
| 3.391896e-26 | EXOSC4 LZ   | 0.3561065  | 0.459 | 0.197 | 6.047412e-22 | 19           |
| 3.449554e-26 | NUBP1 LZ    | 0.346824   | 0.439 | 0.207 | 6.15021e-22  | 19           |
| 3.491311e-26 | EEF1E1 LZ   | 0.3328332  |       | 0.558 | 0.286        | 6.224659e-22 |
| 3.579159e-26 | CDC123 LZ   | 0.4256711  |       | 0.698 | 0.394        | 6.381283e-22 |
| 4.496866e-26 | NDUFS5 LZ   | 0.3557463  |       | 0.347 | 0.131        | 8.017462e-22 |
| 4.790353e-26 | PMPCA LZ    | 0.5174344  |       | 0.355 | 0.102        | 8.540721e-22 |
| 5.221131e-26 | HRK LZ      | 0.3562537  |       | 0.513 | 0.263        | 9.308755e-22 |
| 5.981039e-26 | PSMD3 LZ    | 0.3801817  |       | 0.649 | 0.36         | 1.066359e-21 |
| 6.932709e-26 | TERF2IP LZ  | 0.3695405  |       | 0.467 | 0.216        | 1.236033e-21 |
| 7.599508e-26 | SMARCC1 LZ  | 0.5723093  |       | 0.292 | 0.081        | 1.354916e-21 |
| 8.206276e-26 | SH3TC1 LZ   | 0.3187107  |       | 0.642 | 0.362        | 1.463097e-21 |
| 9.724858e-26 | RPS19BP1 LZ | 0.3279745  |       | 0.214 | 0.061        | 1.733845e-21 |
| 1.007968e-25 | IL21R LZ    | 0.3026587  |       | 0.326 | 0.133        | 1.797106e-21 |
| 1.128181e-25 | PES1 LZ     | 0.3379949  |       | 0.436 | 0.204        | 2.011434e-21 |
| 1.195618e-25 | ITPA LZ     | -0.4286436 | 1     | 0.999 | 2.131668e-21 | 19           |
| 1.861648e-25 | RPL34 LZ    | 0.525977   | 0.276 | 0.067 | 3.319133e-21 | 19           |
| 2.210764e-25 | RASSF6 LZ   | 0.3273887  |       | 0.564 | 0.312        | 3.94157e-21  |
| 2.352122e-25 | WDR1 LZ     | -0.7774238 |       | 0.39  | 0.468        | 4.193599e-21 |
| 3.999128e-25 | ITM2B LZ    | 0.3825826  |       | 0.379 | 0.145        | 7.130045e-21 |
| 4.276723e-25 | SMARCA4 LZ  | 0.3425547  |       | 0.372 | 0.145        | 7.62497e-21  |
| 4.877935e-25 | METTL21A LZ | 0.3762014  |       | 0.597 | 0.305        | 8.696871e-21 |
| 5.782027e-25 | PGLS LZ     | 0.3308062  |       | 0.345 | 0.132        | 1.030878e-20 |
| 7.664554e-25 | DPP3 LZ     | 0.4200759  |       | 0.594 | 0.284        | 1.366513e-20 |
| 7.68201e-25  | RUBCNL LZ   | 0.3284398  |       | 0.506 | 0.236        | 1.369625e-20 |
| 9.987019e-25 | SLC38A1 LZ  | 0.3144928  |       | 0.51  | 0.242        | 1.780586e-20 |



|              |                          |       |       |              |    |
|--------------|--------------------------|-------|-------|--------------|----|
| 1.28294e-24  | PRPF31 LZ<br>0.4736341   | 0.407 | 0.156 | 2.287353e-20 | 19 |
| 1.731924e-24 | C12orf75 LZ<br>0.3039042 | 0.743 | 0.48  | 3.087847e-20 | 19 |
| 1.855926e-24 | GTF3A LZ<br>0.3207524    | 0.456 | 0.221 | 3.308931e-20 | 19 |
| 2.268734e-24 | DAZAP1 LZ<br>0.3091445   | 0.462 | 0.219 | 4.044925e-20 | 19 |
| 2.801017e-24 | RPIA LZ<br>0.3462514     | 0.42  | 0.183 | 4.993934e-20 | 19 |
| 4.748657e-24 | MRPL36 LZ<br>0.3349275   | 0.375 | 0.154 | 8.466381e-20 | 19 |
| 5.704029e-24 | CHCHD5 LZ<br>0.3093939   | 0.239 | 0.067 | 1.016971e-19 | 19 |
| 5.795473e-24 | SH3BP1 LZ<br>0.3461157   | 0.724 | 0.405 | 1.033275e-19 | 19 |
| 6.196479e-24 | SEPT6 LZ<br>0.358712     | 0.467 | 0.219 | 1.10477e-19  | 19 |
| 6.546689e-24 | HSPH1 LZ<br>0.5353471    | 0.414 | 0.13  | 1.167209e-19 | 19 |
| 7.093485e-24 | NEIL1 LZ<br>0.3262434    | 0.267 | 0.085 | 1.264697e-19 | 19 |
| 7.377669e-24 | TSPAN33 LZ<br>0.3669682  | 0.641 | 0.333 | 1.315365e-19 | 19 |
| 9.04236e-24  | NDUFC1 LZ<br>-0.5990407  | 0.117 | 0.208 | 1.612162e-19 | 19 |
| 1.093641e-23 | C16orf74 LZ<br>0.3257348 | 0.284 | 0.101 | 1.949852e-19 | 19 |
| 1.367657e-23 | UCLH3 LZ<br>0.3257632    | 0.337 | 0.129 | 2.438396e-19 | 19 |
| 1.47349e-23  | ERCC1 LZ<br>1.005507     | 0.933 | 0.751 | 2.627085e-19 | 19 |
| 1.485935e-23 | HLA-DRB1 LZ<br>0.3252803 | 0.519 | 0.269 | 2.649274e-19 | 19 |
| 1.514204e-23 | CAMTA1 LZ<br>0.320036    | 0.699 | 0.406 | 2.699675e-19 | 19 |
| 1.669837e-23 | EID1 LZ<br>0.3248324     | 0.502 | 0.226 | 2.977153e-19 | 19 |
| 1.968856e-23 | CKS2 LZ<br>0.3252719     | 0.666 | 0.377 | 3.510274e-19 | 19 |
| 2.350385e-23 | NDUFC2 LZ<br>0.3125185   | 0.238 | 0.072 | 4.190501e-19 | 19 |
| 2.43809e-23  | RNF121 LZ<br>0.3882117   | 0.372 | 0.162 | 4.346871e-19 | 19 |
| 2.787566e-23 | TOR3A LZ<br>-0.6409973   | 0.083 | 0.185 | 4.969952e-19 | 19 |
| 3.206529e-23 | PLPP5 LZ<br>0.3427186    | 0.203 | 0.065 | 5.71692e-19  | 19 |
| 3.25462e-23  | TEX9 LZ<br>0.324168      | 0.417 | 0.185 | 5.802662e-19 | 19 |

|              |            |       |       |              |    |  |
|--------------|------------|-------|-------|--------------|----|--|
| RUVBL2       | LZ         |       |       |              |    |  |
| 3.756634e-23 | 0.3215245  | 0.737 | 0.451 | 6.697702e-19 | 19 |  |
| CAPZA1       | LZ         |       |       |              |    |  |
| 4.92758e-23  | 0.3298682  | 0.396 | 0.174 | 8.785383e-19 | 19 |  |
| LAP3         | LZ         |       |       |              |    |  |
| 5.466681e-23 | 0.3994345  | 0.621 | 0.326 | 9.746545e-19 | 19 |  |
| CCM2         | LZ         |       |       |              |    |  |
| 5.489837e-23 | 0.3327645  | 0.464 | 0.219 | 9.78783e-19  | 19 |  |
| PSMB5        | LZ         |       |       |              |    |  |
| 5.810044e-23 | 0.3922551  | 0.445 | 0.18  | 1.035873e-18 | 19 |  |
| APBB1IP      | LZ         |       |       |              |    |  |
| 7.093715e-23 | 0.3573125  | 0.726 | 0.429 | 1.264738e-18 | 19 |  |
| CYB561A3     | LZ         |       |       |              |    |  |
| 9.837198e-23 | 0.3862071  | 0.476 | 0.229 | 1.753874e-18 | 19 |  |
| ZNF581       | LZ         |       |       |              |    |  |
| 1.110646e-22 | -0.7466483 | 0.408 | 0.493 | 1.980171e-18 | 19 |  |
| CYTIP        | LZ         |       |       |              |    |  |
| 1.179208e-22 | 0.3105128  | 0.343 | 0.138 | 2.102409e-18 | 19 |  |
| RUVBL1       | LZ         |       |       |              |    |  |
| 1.228179e-22 | -0.3874647 | 1     | 0.999 | 2.18972e-18  | 19 |  |
| RPLP1        | LZ         |       |       |              |    |  |
| 1.273857e-22 | 0.3371212  | 0.344 | 0.133 | 2.27116e-18  | 19 |  |
| GTF2E2       | LZ         |       |       |              |    |  |
| 1.328256e-22 | 0.3767429  | 0.565 | 0.304 | 2.368147e-18 | 19 |  |
| CALR         | LZ         |       |       |              |    |  |
| 1.932229e-22 | 0.3203447  | 0.401 | 0.176 | 3.444972e-18 | 19 |  |
| TMC6         | LZ         |       |       |              |    |  |
| 2.356636e-22 | 0.3917931  | 0.45  | 0.172 | 4.201646e-18 | 19 |  |
| SYK          | LZ         |       |       |              |    |  |
| 2.619232e-22 | 0.3009081  | 0.415 | 0.209 | 4.669828e-18 | 19 |  |
| PRPF19       | LZ         |       |       |              |    |  |
| 3.495029e-22 | 0.3364755  | 0.722 | 0.417 | 6.231287e-18 | 19 |  |
| TMEM123      | LZ         |       |       |              |    |  |
| 3.541981e-22 | 0.3425672  | 0.358 | 0.144 | 6.314998e-18 | 19 |  |
| ZNF580       | LZ         |       |       |              |    |  |
| 4.800131e-22 | 0.3586162  | 0.471 | 0.225 | 8.558154e-18 | 19 |  |
| HDDC2        | LZ         |       |       |              |    |  |
| 5.263851e-22 | 0.3808743  | 0.576 | 0.292 | 9.384919e-18 | 19 |  |
| PDHB         | LZ         |       |       |              |    |  |
| 6.206175e-22 | 0.3206966  | 0.607 | 0.334 | 1.106499e-17 | 19 |  |
| EIF1AX       | LZ         |       |       |              |    |  |
| 8.982971e-22 | -1.115384  | 0.434 | 0.572 | 1.601574e-17 | 19 |  |
| VIM          | LZ         |       |       |              |    |  |
| 9.855229e-22 | 0.3159349  | 0.562 | 0.304 | 1.757089e-17 | 19 |  |
| MMADHC       | LZ         |       |       |              |    |  |
| 1.024158e-21 | 0.3615387  | 0.408 | 0.179 | 1.825972e-17 | 19 |  |
| RASGRP3      | LZ         |       |       |              |    |  |
| 1.092793e-21 | 0.3267711  | 0.641 | 0.341 | 1.948341e-17 | 19 |  |
| H2AFY        | LZ         |       |       |              |    |  |
| 1.510901e-21 | 0.322778   | 0.421 | 0.189 | 2.693785e-17 | 19 |  |

|              |            |       |       |              |    |  |
|--------------|------------|-------|-------|--------------|----|--|
| RFXANK       | LZ         |       |       |              |    |  |
| 1.588413e-21 | 0.3393923  | 0.653 | 0.35  | 2.831981e-17 | 19 |  |
| CD19         | LZ         |       |       |              |    |  |
| 1.603289e-21 | 0.3937157  | 0.52  | 0.241 | 2.858504e-17 | 19 |  |
| IKZF1        | LZ         |       |       |              |    |  |
| 1.827567e-21 | 0.3109428  | 0.643 | 0.353 | 3.258369e-17 | 19 |  |
| GNAS         | LZ         |       |       |              |    |  |
| 2.034274e-21 | -0.3945765 | 1     | 1     | 3.626907e-17 | 19 |  |
| RPL21        | LZ         |       |       |              |    |  |
| 2.071557e-21 | 0.3304589  | 0.375 | 0.153 | 3.693379e-17 | 19 |  |
| MFAP1        | LZ         |       |       |              |    |  |
| 2.181615e-21 | 0.3664618  | 0.516 | 0.235 | 3.889602e-17 | 19 |  |
| SP140        | LZ         |       |       |              |    |  |
| 2.589661e-21 | 0.3203399  | 0.583 | 0.304 | 4.617107e-17 | 19 |  |
| FKBP3        | LZ         |       |       |              |    |  |
| 2.738918e-21 | 0.4009999  | 0.4   | 0.143 | 4.883217e-17 | 19 |  |
| RBM38        | LZ         |       |       |              |    |  |
| 3.389558e-21 | 0.326863   | 0.329 | 0.126 | 6.043243e-17 | 19 |  |
| DNAJB2       | LZ         |       |       |              |    |  |
| 4.24136e-21  | 0.3467865  | 0.544 | 0.285 | 7.561921e-17 | 19 |  |
| RRAS2        | LZ         |       |       |              |    |  |
| 4.591748e-21 | 0.3232034  | 0.334 | 0.142 | 8.186628e-17 | 19 |  |
| MRPL39       | LZ         |       |       |              |    |  |
| 6.082435e-21 | 0.3183305  | 0.357 | 0.158 | 1.084437e-16 | 19 |  |
| DCPS         | LZ         |       |       |              |    |  |
| 6.313746e-21 | 0.3447396  | 0.66  | 0.396 | 1.125678e-16 | 19 |  |
| RAP1A        | LZ         |       |       |              |    |  |
| 6.972698e-21 | 0.325308   | 0.393 | 0.172 | 1.243162e-16 | 19 |  |
| EIF4E2       | LZ         |       |       |              |    |  |
| 7.119485e-21 | 0.3553474  | 0.608 | 0.317 | 1.269333e-16 | 19 |  |
| NAA38        | LZ         |       |       |              |    |  |
| 7.506816e-21 | 0.305585   | 0.529 | 0.274 | 1.33839e-16  | 19 |  |
| CNIH1        | LZ         |       |       |              |    |  |
| 9.867105e-21 | 0.3128003  | 0.204 | 0.06  | 1.759206e-16 | 19 |  |
| NINJ1        | LZ         |       |       |              |    |  |
| 1.230501e-20 | 0.327147   | 0.399 | 0.183 | 2.19386e-16  | 19 |  |
| COPS8        | LZ         |       |       |              |    |  |
| 1.238598e-20 | -1.401201  | 0.341 | 0.467 | 2.208296e-16 | 19 |  |
| S100A6       | LZ         |       |       |              |    |  |
| 1.84668e-20  | 0.3615471  | 0.299 | 0.121 | 3.292445e-16 | 19 |  |
| PLEK         | LZ         |       |       |              |    |  |
| 2.303986e-20 | -0.7451186 | 0.231 | 0.322 | 4.107776e-16 | 19 |  |
| TUBA1A       | LZ         |       |       |              |    |  |
| 2.921e-20    | -0.6562026 | 0.084 | 0.198 | 5.207851e-16 | 19 |  |
| CHPT1        | LZ         |       |       |              |    |  |
| 2.967227e-20 | 0.3446215  | 0.636 | 0.362 | 5.290268e-16 | 19 |  |
| CXXC5        | LZ         |       |       |              |    |  |
| 3.067852e-20 | -0.6503621 | 0.032 | 0.138 | 5.469673e-16 | 19 |  |
| FCER2        | LZ         |       |       |              |    |  |
| 3.219471e-20 | 0.3980242  | 0.292 | 0.092 | 5.739996e-16 | 19 |  |

|              |                |       |              |              |    |  |
|--------------|----------------|-------|--------------|--------------|----|--|
| PXMP2        | LZ             |       |              |              |    |  |
| 3.49998e-20  | -0.72202 0.071 | 0.212 | 6.240114e-16 | 19           |    |  |
| MGST3        | LZ             |       |              |              |    |  |
| 3.865481e-20 | 0.3161705      | 0.215 | 0.061        | 6.891766e-16 | 19 |  |
| ZNF608       | LZ             |       |              |              |    |  |
| 6.012608e-20 | 0.3063854      | 0.501 | 0.245        | 1.071988e-15 | 19 |  |
| SH3KBP1      | LZ             |       |              |              |    |  |
| 7.309234e-20 | 0.3317991      | 0.403 | 0.162        | 1.303163e-15 | 19 |  |
| ARHGAP25     | LZ             |       |              |              |    |  |
| 7.943303e-20 | -0.6884593     | 0.179 | 0.253        | 1.416212e-15 | 19 |  |
| FCMR         | LZ             |       |              |              |    |  |
| 8.180657e-20 | 0.3471017      | 0.993 | 0.945        | 1.458529e-15 | 19 |  |
| HLA-DRA      | LZ             |       |              |              |    |  |
| 1.161064e-19 | 0.307916 0.571 | 0.322 | 2.07006e-15  | 19           |    |  |
| SNRNP70      | LZ             |       |              |              |    |  |
| 1.162589e-19 | 0.4053305      | 0.508 | 0.273        | 2.072779e-15 | 19 |  |
| HSPA5        | LZ             |       |              |              |    |  |
| 2.799609e-19 | 0.4283238      | 0.152 | 0.031        | 4.991424e-15 | 19 |  |
| GNG11        | LZ             |       |              |              |    |  |
| 2.896783e-19 | 0.3004452      | 0.455 | 0.216        | 5.164674e-15 | 19 |  |
| SNX5         | LZ             |       |              |              |    |  |
| 4.594617e-19 | -0.6580167     | 0.185 | 0.285        | 8.191743e-15 | 19 |  |
| GNG7         | LZ             |       |              |              |    |  |
| 4.970604e-19 | 0.3186749      | 0.449 | 0.209        | 8.86209e-15  | 19 |  |
| STARD7       | LZ             |       |              |              |    |  |
| 5.240035e-19 | -0.6343789     | 0.22  | 0.298        | 9.342458e-15 | 19 |  |
| PDLIM1       | LZ             |       |              |              |    |  |
| 6.096516e-19 | 0.3049965      | 0.413 | 0.184        | 1.086948e-14 | 19 |  |
| GLRX5        | LZ             |       |              |              |    |  |
| 8.871522e-19 | 0.4039683      | 0.316 | 0.124        | 1.581704e-14 | 19 |  |
| MSI2         | LZ             |       |              |              |    |  |
| 1.638075e-18 | 0.3078229      | 0.401 | 0.179        | 2.920525e-14 | 19 |  |
| TRABD        | LZ             |       |              |              |    |  |
| 1.787105e-18 | -0.7664039     | 0.531 | 0.577        | 3.18623e-14  | 19 |  |
| SARAF        | LZ             |       |              |              |    |  |
| 3.410366e-18 | -0.5333399     | 0.045 | 0.151        | 6.080342e-14 | 19 |  |
| CELF2        | LZ             |       |              |              |    |  |
| 3.790701e-18 | -0.9132801     | 0.309 | 0.428        | 6.758441e-14 | 19 |  |
| PLP2         | LZ             |       |              |              |    |  |
| 3.795899e-18 | 0.3171193      | 0.529 | 0.267        | 6.767709e-14 | 19 |  |
| TXNL4A       | LZ             |       |              |              |    |  |
| 4.263995e-18 | 0.3617481      | 0.309 | 0.104        | 7.602277e-14 | 19 |  |
| E2F5         | LZ             |       |              |              |    |  |
| 5.29838e-18  | -0.3537493     | 0.906 | 0.905        | 9.446482e-14 | 19 |  |
| HLA-A        | LZ             |       |              |              |    |  |
| 6.111454e-18 | -0.5054195     | 0.123 | 0.192        | 1.089611e-13 | 19 |  |
| S1PR4        | LZ             |       |              |              |    |  |
| 6.177852e-18 | 0.3219082      | 0.376 | 0.169        | 1.101449e-13 | 19 |  |
| CBWD1        | LZ             |       |              |              |    |  |
| 7.58614e-18  | 0.3111063      | 0.343 | 0.132        | 1.352533e-13 | 19 |  |

|              |             |            |       |       |              |    |
|--------------|-------------|------------|-------|-------|--------------|----|
| 8.128956e-18 | MPST LZ     | 0.5148242  | 0.757 | 0.493 | 1.449312e-13 | 19 |
| 9.133845e-18 | SAT1 LZ     | 0.3160808  | 0.248 | 0.082 | 1.628473e-13 | 19 |
| 3.761185e-17 | TMEM131L LZ | 0.3117988  | 0.58  | 0.326 | 6.705817e-13 | 19 |
| 3.969733e-17 | TSP0 LZ     | 0.3878379  | 0.586 | 0.269 | 7.077636e-13 | 19 |
| 5.862826e-17 | NCF1 LZ     | 0.3558593  | 0.538 | 0.23  | 1.045283e-12 | 19 |
| 8.827658e-17 | UBE2J1 LZ   | 0.3002233  | 0.359 | 0.154 | 1.573883e-12 | 19 |
| 1.936242e-16 | SMIM20 LZ   | -0.6475981 | 0.952 | 0.935 | 3.452127e-12 | 19 |
| 2.009858e-16 | BTG1 LZ     | 0.3035514  | 0.406 | 0.193 | 3.583377e-12 | 19 |
| 4.023855e-16 | UBE2E1 LZ   | 0.3145907  | 0.306 | 0.123 | 7.174132e-12 | 19 |
| 5.629466e-16 | COMMD4 LZ   | 0.3117542  | 0.26  | 0.098 | 1.003678e-11 | 19 |
| 6.846649e-16 | PTPN7 LZ    | -0.7499264 | 0.238 | 0.317 | 1.220689e-11 | 19 |
| 6.995232e-16 | CD69 LZ     | 0.3069236  | 0.252 | 0.097 | 1.24718e-11  | 19 |
| 9.078361e-16 | FAM241A LZ  | 0.3120705  | 0.473 | 0.214 | 1.618581e-11 | 19 |
| 1.124055e-15 | NANS LZ     | 0.3512313  | 0.344 | 0.127 | 2.004078e-11 | 19 |
| 1.87258e-15  | STIM2 LZ    | -0.4216255 | 1     | 0.998 | 3.338622e-11 | 19 |
| 2.098733e-15 | RPL11 LZ    | -0.4149361 | 1     | 0.998 | 3.741831e-11 | 19 |
| 3.035786e-15 | RPLP2 LZ    | -0.5565759 | 0.989 | 0.968 | 5.412503e-11 | 19 |
| 3.057233e-15 | MT-ND3 LZ   | -0.6018322 | 0.285 | 0.363 | 5.45074e-11  | 19 |
| 3.929976e-15 | ANXA6 LZ    | 0.3156576  | 0.33  | 0.154 | 7.006753e-11 | 19 |
| 7.28006e-15  | DNAJB11 LZ  | -0.3638112 | 1     | 1     | 1.297962e-10 | 19 |
| 8.354998e-15 | RPS27 LZ    | -0.5102236 | 0.124 | 0.175 | 1.489613e-10 | 19 |
| 8.966375e-15 | MARCH1 LZ   | -0.7445365 | 0.341 | 0.415 | 1.598615e-10 | 19 |
| 9.670495e-15 | NPC2 LZ     | 0.3537501  | 0.997 | 0.989 | 1.724152e-10 | 19 |
| 2.256297e-14 | CD74 LZ     | -0.5724102 | 0.357 | 0.389 | 4.022751e-10 | 19 |
| 3.25588e-14  | EVI2B LZ    | 0.4475982  | 0.368 | 0.155 | 5.804908e-10 | 19 |

|              |              |            |       |       |              |    |
|--------------|--------------|------------|-------|-------|--------------|----|
| 6.287747e-14 | KIAA0040 LZ  | 0.3228767  | 0.41  | 0.224 | 1.121042e-09 | 19 |
| 7.534256e-14 | ADI1 LZ      | -0.3654876 | 0.993 | 0.985 | 1.343283e-09 | 19 |
| 9.262905e-14 | RPL27 LZ     | -0.8713109 | 0.404 | 0.457 | 1.651483e-09 | 19 |
| 1.221657e-13 | JUNB LZ      | -0.4807261 | 0.083 | 0.146 | 2.178092e-09 | 19 |
| 1.306323e-13 | SUN2 LZ      | -0.5844189 | 0.656 | 0.615 | 2.329043e-09 | 19 |
| 2.134054e-13 | MEF2C LZ     | -0.4471949 | 0.102 | 0.159 | 3.804804e-09 | 19 |
| 3.308443e-13 | GLIPR1 LZ    | 0.3165177  | 0.173 | 0.045 | 5.898623e-09 | 19 |
| 4.108178e-13 | COL9A3 LZ    | -0.3119527 | 1     | 0.999 | 7.324471e-09 | 19 |
| 4.891651e-13 | RPL13A LZ    | 0.3873215  | 0.39  | 0.157 | 8.721324e-09 | 19 |
| 1.377451e-12 | SUSD3 LZ     | -0.6452014 | 0.572 | 0.57  | 2.455857e-08 | 19 |
| 1.661054e-12 | SNX2 LZ      | -0.5711487 | 0.206 | 0.238 | 2.961494e-08 | 19 |
| 2.07411e-12  | CD55 LZ      | -0.6598939 | 0.221 | 0.279 | 3.697931e-08 | 19 |
| 2.9104e-12   | ADAM28 LZ    | -0.8024294 | 0.621 | 0.606 | 5.188952e-08 | 19 |
| 5.072653e-12 | IGHD LZ      | -0.4217921 | 0.199 | 0.211 | 9.044032e-08 | 19 |
| 5.749643e-12 | FAM111B LZ   | -0.5381439 | 0.157 | 0.23  | 1.025104e-07 | 19 |
| 8.56936e-12  | NT5C3A LZ    | 0.3165067  | 0.175 | 0.061 | 1.527831e-07 | 19 |
| 9.592305e-12 | HOPX LZ      | -0.9509283 | 0.71  | 0.665 | 1.710212e-07 | 19 |
| 1.165734e-11 | TUBA1B LZ    | 0.4120947  | 0.372 | 0.15  | 2.078387e-07 | 19 |
| 1.653577e-11 | CD81 LZ      | -0.3902039 | 0.063 | 0.11  | 2.948162e-07 | 19 |
| 2.269988e-11 | LINC02397 LZ | -0.7104377 | 0.418 | 0.446 | 4.047162e-07 | 19 |
| 2.801979e-11 | KLF6 LZ      | -0.3617908 | 0.997 | 0.995 | 4.995648e-07 | 19 |
| 3.64071e-11  | RPL31 LZ     | -0.3834357 | 0.039 | 0.101 | 6.491022e-07 | 19 |
| 3.856923e-11 | RHOC LZ      | -0.406946  | 0.05  | 0.119 | 6.876508e-07 | 19 |
| 4.122625e-11 | FCGR2B LZ    | -0.5214203 | 0.273 | 0.285 | 7.350228e-07 | 19 |
| 9.00318e-11  | PPM1K LZ     | -0.4745205 | 0.143 | 0.194 | 1.605177e-06 | 19 |

|              |              |            |       |       |              |    |
|--------------|--------------|------------|-------|-------|--------------|----|
| 9.717025e-11 | HSPB1 LZ     | -0.5383987 | 0.183 | 0.212 | 1.732448e-06 | 19 |
| 1.404239e-10 | LBH LZ       | -0.3470347 | 1     | 0.997 | 2.503618e-06 | 19 |
| 1.898878e-10 | RPS3A LZ     | -0.3403278 | 0.999 | 0.996 | 3.385509e-06 | 19 |
| 3.569024e-10 | RPL35A LZ    | -0.9321112 | 0.137 | 0.207 | 6.363212e-06 | 19 |
| 4.872026e-10 | LGALS1 LZ    | -0.3663875 | 1     | 0.999 | 8.686335e-06 | 19 |
| 5.237668e-10 | RPL39 LZ     | -0.5284919 | 0.366 | 0.389 | 9.338238e-06 | 19 |
| 9.648983e-10 | ARL6IP5 LZ   | -0.6109617 | 0.483 | 0.503 | 1.720317e-05 | 19 |
| 1.169252e-09 | TSC22D3 LZ   | -0.456788  | 0.257 | 0.267 | 2.08466e-05  | 19 |
| 1.254486e-09 | HHEX LZ      | -0.6389277 | 0.154 | 0.239 | 2.236623e-05 | 19 |
| 1.734722e-09 | CAPG LZ      | -0.3706171 | 0.066 | 0.113 | 3.092836e-05 | 19 |
| 3.784988e-09 | P2RY10 LZ    | -0.4441411 | 0.357 | 0.331 | 6.748254e-05 | 19 |
| 3.793079e-09 | RIPOR2 LZ    | -0.5104654 | 0.252 | 0.279 | 6.76268e-05  | 19 |
| 4.354742e-09 | IFITM2 LZ    | 0.3133402  | 0.765 | 0.484 | 7.764069e-05 | 19 |
| 5.069733e-09 | LTB LZ       | -0.5762064 | 0.986 | 0.963 | 9.038826e-05 | 19 |
| 6.654976e-09 | FTL LZ       | -0.3712298 | 0.067 | 0.106 | 0.0001186516 | 19 |
| 1.022189e-08 | C1orf162 LZ  | -0.3098025 | 1     | 0.999 | 0.0001822461 | 19 |
| 1.38144e-08  | RPL13 LZ     | -0.4074838 | 0.175 | 0.204 | 0.0002462969 | 19 |
| 2.82811e-08  | IRF1 LZ      | -0.3893036 | 0.124 | 0.143 | 0.0005042237 | 19 |
| 3.177458e-08 | DUSP1 LZ     | -0.5264503 | 0.197 | 0.249 | 0.0005665089 | 19 |
| 3.655336e-08 | TNFRSF13B LZ | -0.360661  | 0.101 | 0.149 | 0.0006517099 | 19 |
| 4.205596e-08 | SVIP LZ      | -0.4055767 | 0.303 | 0.318 | 0.0007498157 | 19 |
| 5.878193e-08 | FCRLA LZ     | -0.4471415 | 0.229 | 0.246 | 0.001048023  | 19 |
| 6.44329e-08  | CKS1B LZ     | -0.34494   | 0.092 | 0.151 | 0.001148774  | 19 |
| 6.797073e-08 | CYB5A LZ     | -0.3728256 | 0.057 | 0.106 | 0.00121185   | 19 |
| 9.050589e-08 | MTSS1 LZ     | -0.8819483 | 0.25  | 0.264 | 0.001613629  | 19 |

|              |            |       |       |             |    |    |
|--------------|------------|-------|-------|-------------|----|----|
| S100A4       | LZ         |       |       |             |    |    |
| 9.720699e-08 | -0.6329884 | 0.129 | 0.198 | 0.001733103 |    | 19 |
| ACP5         | LZ         |       |       |             |    |    |
| 1.252761e-07 | -0.3850664 | 0.071 | 0.123 | 0.002233548 |    | 19 |
| DDAH2        | LZ         |       |       |             |    |    |
| 1.2819e-07   | -0.3951328 | 0.164 | 0.205 | 0.002285499 |    | 19 |
| AP1S2        | LZ         |       |       |             |    |    |
| 1.282865e-07 | -0.4423333 | 0.113 | 0.171 | 0.002287221 |    | 19 |
| PARP14       | LZ         |       |       |             |    |    |
| 1.342418e-07 | -0.4175398 | 0.108 | 0.148 | 0.002393397 |    | 19 |
| ARRDC2       | LZ         |       |       |             |    |    |
| 4.183808e-07 | -0.3004403 | 0.092 | 0.113 | 0.007459311 |    | 19 |
| PBXIP1       | LZ         |       |       |             |    |    |
| 5.933114e-07 | -0.5036502 | 0.396 | 0.387 | 0.01057815  |    | 19 |
| PSAP         | LZ         |       |       |             |    |    |
| 8.010041e-07 | -0.4642913 | 0.677 | 0.619 | 0.0142811   |    | 19 |
| IFI16        | LZ         |       |       |             |    |    |
| 1.088456e-06 | -0.5222841 | 0.2   | 0.209 | 0.01940608  |    | 19 |
| FOS          | LZ         |       |       |             |    |    |
| 1.396183e-06 | -0.399047  | 1     | 0.996 | 0.02489255  |    | 19 |
| RPS12        | LZ         |       |       |             |    |    |
| 1.756267e-06 | -0.4604295 | 0.259 | 0.275 | 0.03131248  |    | 19 |
| TNRC6B       | LZ         |       |       |             |    |    |
| 2.172396e-06 | -0.3206708 | 0.213 | 0.214 | 0.03873165  |    | 19 |
| YPEL3        | LZ         |       |       |             |    |    |
| 2.264953e-06 | 0.3166142  | 0.183 | 0.047 | 0.04038185  |    | 19 |
| XIST         | LZ         |       |       |             |    |    |
| 2.922395e-06 | -0.3034409 | 1     | 0.995 | 0.05210339  |    | 19 |
| RPS25        | LZ         |       |       |             |    |    |
| 3.00575e-06  | -0.4722756 | 0.322 | 0.33  | 0.05358952  |    | 19 |
| SMC6         | LZ         |       |       |             |    |    |
| 3.284863e-06 | -0.3564016 | 0.999 | 0.991 | 0.05856582  |    | 19 |
| RPL30        | LZ         |       |       |             |    |    |
| 3.637705e-06 | -0.3864636 | 0.166 | 0.187 | 0.06485664  |    | 19 |
| KIF20B       | LZ         |       |       |             |    |    |
| 5.529801e-06 | -0.3738928 | 0.999 | 0.991 | 0.09859082  |    | 19 |
| RPL9         | LZ         |       |       |             |    |    |
| 6.068801e-06 | -0.3279323 | 0.074 | 0.124 | 0.1082006   |    | 19 |
| RAB13        | LZ         |       |       |             |    |    |
| 8.23473e-06  | -0.491475  | 0.442 | 0.284 | 0.146817    | 19 |    |
| MIR155HG     | LZ         |       |       |             |    |    |
| 9.092184e-06 | -1.124879  | 0.432 | 0.3   | 0.1621045   |    | 19 |
| HMGB2        | LZ         |       |       |             |    |    |
| 1.112436e-05 | -0.3985951 | 0.994 | 0.982 | 0.1983363   |    | 19 |
| RPS21        | LZ         |       |       |             |    |    |
| 1.526817e-05 | -0.4869048 | 0.351 | 0.302 | 0.2722162   |    | 19 |
| ZFP36L2      | LZ         |       |       |             |    |    |
| 1.780203e-05 | -0.5613083 | 0.292 | 0.346 | 0.3173925   |    | 19 |
| CAST         | LZ         |       |       |             |    |    |
| 1.801917e-05 | -0.4061041 | 0.639 | 0.598 | 0.3212638   |    | 19 |



|          |    |              |            |       |       |           |    |
|----------|----|--------------|------------|-------|-------|-----------|----|
| CALM1    | LZ | 1.888554e-05 | -0.3022114 | 0.129 | 0.151 | 0.3367103 | 19 |
| TMEM19   | LZ | 2.019879e-05 | -0.3883508 | 0.234 | 0.232 | 0.3601242 | 19 |
| HSD17B11 | LZ | 2.321905e-05 | -0.3469651 | 0.129 | 0.165 | 0.4139725 | 19 |
| TES      | LZ | 2.851079e-05 | -0.3048344 | 0.112 | 0.134 | 0.5083189 | 19 |
| ODF2L    | LZ | 5.520905e-05 | -0.4375435 | 0.109 | 0.158 | 0.9843222 | 19 |
| SLC2A3   | LZ | 7.653792e-05 | -0.3015876 | 0.565 | 0.652 | 1         | 19 |
| RPS4Y1   | LZ | 8.792113e-05 | -0.3041587 | 0.145 | 0.16  | 1         | 19 |
| AIDA     | LZ | 9.898438e-05 | -0.3769399 | 0.299 | 0.284 | 1         | 19 |
| ACAP1    | LZ | 0.0001325541 | -0.5983169 | 0.361 | 0.36  | 1         | 19 |
| ARID5B   | LZ | 0.0001814914 | -0.3250525 | 0.429 | 0.208 | 1         | 19 |
| PLCG2    | LZ | 0.0001923842 | -0.3126822 | 0.397 | 0.322 | 1         | 19 |
|          | LZ | 0.0002171631 | -0.3143786 | 0.087 | 0.112 | 1         | 19 |
| C1orf56  | LZ | 0.0002552327 | -0.4562175 | 0.548 | 0.493 | 1         | 19 |
| SP100    | LZ | 0.0002597377 | -0.3238884 | 0.197 | 0.218 | 1         | 19 |
|          | LZ | 0.0003056432 | -0.4236506 | 0.401 | 0.401 | 1         | 19 |
| CMPK1    | LZ | 0.0003442273 | -0.4135524 | 0.348 | 0.337 | 1         | 19 |
| HVCN1    | LZ | 0.0004552031 | -0.3293556 | 0.197 | 0.199 | 1         | 19 |
| CLK1     | LZ | 0.001379637  | -0.6116434 | 0.684 | 0.399 | 1         | 19 |
| JCHAIN   | LZ | 0.001464869  | -0.3364875 | 0.989 | 0.965 | 1         | 19 |
| RPL38    | LZ | 0.001519217  | -0.3041963 | 0.215 | 0.205 | 1         | 19 |
| RALGPS2  | LZ | 0.001606203  | -0.5882269 | 0.694 | 0.418 | 1         | 19 |
| HIST1H4C | LZ | 0.002377423  | -0.6242795 | 0.666 | 0.575 | 1         | 19 |
| TUBB     | LZ | 0.002541151  | -0.3798787 | 0.966 | 0.916 | 1         | 19 |
| PFDN5    | LZ | 0.002915007  | -0.4596885 | 0.55  | 0.491 | 1         | 19 |
| ANKRD12  | LZ | 0.003061051  | -1.708747  | 0.344 | 0.241 | 1         | 19 |

AES

EBP

|               |                |       |               |               |    |     |
|---------------|----------------|-------|---------------|---------------|----|-----|
| IGHG4 LZ      |                |       |               |               |    |     |
| 0.003187934   | -0.4147901     | 0.478 | 0.437         | 1             | 19 |     |
| IL2RG LZ      |                |       |               |               |    |     |
| 0.003282974   | -0.4183436     | 0.18  | 0.198         | 1             | 19 |     |
| YBX3 LZ       |                |       |               |               |    |     |
| 0.00348674    | -0.3207047     | 0.183 | 0.189         | 1             | 19 |     |
| IFNGR1 LZ     |                |       |               |               |    |     |
| 0.003728104   | -0.5999926     | 0.979 | 0.926         | 1             | 19 |     |
| IGKC LZ       |                |       |               |               |    |     |
| 0.003802331   | -0.4640587     | 0.122 | 0.161         | 1             | 19 |     |
| DDIT4 LZ      |                |       |               |               |    |     |
| 0.00406321    | -0.3035723     | 0.478 | 0.406         | 1             | 19 |     |
| LSM10 LZ      |                |       |               |               |    |     |
| 0.004585779   | -0.3444653     | 0.403 | 0.383         | 1             | 19 |     |
| LAPTM4A LZ    |                |       |               |               |    |     |
| 0.004810422   | -0.4760941     | 0.985 | 0.977         | 1             | 19 |     |
| RPS10 LZ      |                |       |               |               |    |     |
| 0.005439567   | -0.3186968     | 0.529 | 0.452         | 1             | 19 |     |
| TMEM59 LZ     |                |       |               |               |    |     |
| 0.006063952   | -0.3326056     | 0.364 | 0.319         | 1             | 19 |     |
| LTA4H LZ      |                |       |               |               |    |     |
| 0.007214543   | -0.4471186     | 0.098 | 0.159         | 1             | 19 |     |
| LMNA LZ       |                |       |               |               |    |     |
| 1.261577e-273 | 1.859697 0.729 | 0.189 | 2.249266e-269 |               | 20 |     |
| ACP5 B LY9    |                |       |               |               |    |     |
| 7.447929e-195 | 1.678745 0.523 | 0.136 | 1.327891e-190 |               | 20 | LY9 |
| B LY9         |                |       |               |               |    |     |
| 2.477637e-142 | 0.5446066      | 1     | 1             | 4.41738e-138  |    | 20  |
| MALAT1        | B LY9          |       |               |               |    |     |
| 2.689054e-123 | 0.7192384      | 0.999 | 0.963         | 4.794314e-119 |    | 20  |
| FTL           | B LY9          |       |               |               |    |     |
| 2.219532e-99  | 1.093991 0.687 | 0.409 | 3.957204e-95  |               | 20 |     |
| NPC2 B LY9    |                |       |               |               |    |     |
| 5.801046e-88  | 1.494165 0.31  | 0.092 | 1.034268e-83  |               | 20 |     |
| KLK1 B LY9    |                |       |               |               |    |     |
| 5.483541e-75  | 0.330964 1     | 0.999 | 9.776606e-71  |               | 20 |     |
| RPL34 B LY9   |                |       |               |               |    |     |
| 6.894677e-74  | 0.3075007      | 1     | 1             | 1.229252e-69  |    | 20  |
| RPS27         | B LY9          |       |               |               |    |     |
| 1.855569e-73  | 0.6677346      | 0.926 | 0.748         | 3.308295e-69  |    | 20  |
| CXCR4         | B LY9          |       |               |               |    |     |
| 1.6489e-66    | 0.9877323      | 0.384 | 0.171         | 2.939824e-62  |    | 20  |
| ASAH1         | B LY9          |       |               |               |    |     |
| 5.347113e-59  | -1.098496      | 0.329 | 0.603         | 9.533368e-55  |    | 20  |
| PRDX1         | B LY9          |       |               |               |    |     |
| 3.078381e-51  | -0.8285904     | 0.078 | 0.333         | 5.488446e-47  |    | 20  |
| RFTN1         | B LY9          |       |               |               |    |     |
| 4.163495e-48  | -0.9390686     | 0.075 | 0.303         | 7.423095e-44  |    | 20  |
| NME1          | B LY9          |       |               |               |    |     |
| 6.278082e-48  | 0.7712172      | 0.207 | 0.075         | 1.119319e-43  |    | 20  |

|              |          |       |            |       |       |              |    |
|--------------|----------|-------|------------|-------|-------|--------------|----|
| 6.180154e-47 | SLAMF7   | B LY9 | -1.174217  | 0.164 | 0.408 | 1.10186e-42  | 20 |
| 1.229666e-46 | FABP5    | B LY9 | -1.444229  | 0.084 | 0.29  | 2.192371e-42 | 20 |
| 2.542251e-44 | MIR155HG | B LY9 | -1.292274  | 0.027 | 0.209 | 4.532578e-40 | 20 |
| 2.7942e-42   | RGS13    | B LY9 | -0.7827551 | 0.275 | 0.533 | 4.98178e-38  | 20 |
| 8.269025e-42 | PSME2    | B LY9 | -0.8468889 | 0.154 | 0.402 | 1.474284e-37 | 20 |
| 4.097025e-41 | BASP1    | B LY9 | -1.035305  | 0.442 | 0.659 | 7.304586e-37 | 20 |
| 8.830935e-40 | TCL1A    | B LY9 | 0.7595441  | 0.637 | 0.482 | 1.574467e-35 | 20 |
| 5.042591e-39 | NEAT1    | B LY9 | -0.6786521 | 0.397 | 0.638 | 8.990436e-35 | 20 |
| 1.722537e-38 | PSMA4    | B LY9 | -0.6188478 | 0.734 | 0.872 | 3.071111e-34 | 20 |
| 2.298048e-38 | ARPC2    | B LY9 | 0.7065949  | 0.544 | 0.348 | 4.097189e-34 | 20 |
| 2.804485e-38 | LY6E     | B LY9 | -0.6799448 | 0.154 | 0.397 | 5.000116e-34 | 20 |
| 2.941941e-37 | YWHAE    | B LY9 | 0.5767417  | 0.154 | 0.044 | 5.245187e-33 | 20 |
| 7.089804e-37 | RENBP    | B LY9 | -0.7271425 | 0.01  | 0.151 | 1.264041e-32 | 20 |
| 6.415442e-36 | BIK      | B LY9 | -0.8758331 | 0.548 | 0.718 | 1.143809e-31 | 20 |
| 1.667261e-35 | ENO1     | B LY9 | 0.6548119  | 0.221 | 0.08  | 2.97256e-31  | 20 |
| 2.229886e-35 | FGR      | B LY9 | -0.7369821 | 0.037 | 0.205 | 3.975664e-31 | 20 |
| 4.438438e-34 | HMCES    | B LY9 | -0.6304953 | 0.057 | 0.237 | 7.913292e-30 | 20 |
| 3.335329e-33 | MTHFD2   | B LY9 | -0.7216358 | 0.558 | 0.739 | 5.946558e-29 | 20 |
| 3.451877e-33 | HSPA8    | B LY9 | -0.6584909 | 0.246 | 0.478 | 6.154351e-29 | 20 |
| 6.667764e-33 | SNRPD1   | B LY9 | -0.636755  | 0.169 | 0.388 | 1.188796e-28 | 20 |
| 7.267534e-33 | NHP2     | B LY9 | -0.610291  | 0.388 | 0.611 | 1.295729e-28 | 20 |
| 7.616224e-33 | POMP     | B LY9 | -0.5618948 | 0.422 | 0.649 | 1.357897e-28 | 20 |
| 8.989118e-33 | SNRPG    | B LY9 | -0.5627401 | 0.582 | 0.762 | 1.60267e-28  | 20 |
| 1.098054e-32 | PSMA7    | B LY9 | -0.7232561 | 0.618 | 0.763 | 1.95772e-28  | 20 |
| 1.472012e-32 | PKM      | B LY9 | -0.7269879 | 0.123 | 0.334 | 2.62445e-28  | 20 |

|              |                   |            |       |       |              |    |
|--------------|-------------------|------------|-------|-------|--------------|----|
| 1.521115e-32 | GRHPR<br>B LY9    | -0.5726528 | 0.387 | 0.612 | 2.711996e-28 | 20 |
| 2.134753e-32 | POLR2L<br>B LY9   | -0.9476439 | 0.159 | 0.395 | 3.806051e-28 | 20 |
| 6.697906e-32 | EIF5A<br>B LY9    | -0.5934861 | 0.377 | 0.601 | 1.19417e-27  | 20 |
| 1.199209e-31 | SEC61B<br>B LY9   | -0.5824824 | 0.358 | 0.588 | 2.138069e-27 | 20 |
| 6.90442e-31  | ATP5MC3<br>B LY9  | -0.5522816 | 0.344 | 0.576 | 1.230989e-26 | 20 |
| 7.55208e-31  | PARK7<br>B LY9    | -0.6993669 | 0.059 | 0.237 | 1.34646e-26  | 20 |
| 1.43504e-30  | UBE2J1<br>B LY9   | -0.7616259 | 0.136 | 0.343 | 2.558533e-26 | 20 |
| 2.487626e-30 | LRMP<br>B LY9     | 0.4186767  | 0.873 | 0.773 | 4.435189e-26 | 20 |
| 3.060378e-30 | HLA-DPB1<br>B LY9 | -0.670954  | 0.283 | 0.501 | 5.456349e-26 | 20 |
| 3.373328e-30 | HSPE1<br>B LY9    | -0.6896322 | 0.249 | 0.465 | 6.014306e-26 | 20 |
| 6.285215e-30 | HSPD1<br>B LY9    | -1.833473  | 0.217 | 0.406 | 1.120591e-25 | 20 |
| 6.341626e-30 | JCHAIN<br>B LY9   | -0.6462273 | 0.586 | 0.751 | 1.130648e-25 | 20 |
| 2.953866e-29 | RAN<br>B LY9      | -0.6237004 | 0.186 | 0.405 | 5.266447e-25 | 20 |
| 4.328315e-29 | RPL22L1<br>B LY9  | -0.4720914 | 0.01  | 0.133 | 7.716952e-25 | 20 |
| 4.365865e-28 | PHGDH<br>B LY9    | -0.358141  | 0.003 | 0.104 | 7.7839e-24   | 20 |
| 5.614794e-28 | SEMA4A<br>B LY9   | 0.6055271  | 0.602 | 0.476 | 1.001062e-23 | 20 |
| 9.134774e-28 | SQSTM1<br>B LY9   | -0.5536668 | 0.101 | 0.292 | 1.628639e-23 | 20 |
| 9.379212e-28 | RRAS2<br>B LY9    | 0.6677422  | 0.38  | 0.264 | 1.67222e-23  | 20 |
| 1.157527e-27 | GRN<br>B LY9      | 0.7291276  | 0.412 | 0.266 | 2.063754e-23 | 20 |
| 1.837867e-27 | GPR183<br>B LY9   | -0.4864339 | 0.008 | 0.12  | 3.276733e-23 | 20 |
| 2.596117e-27 | CD38<br>B LY9     | -0.68616   | 0.619 | 0.77  | 4.628616e-23 | 20 |
| 2.597163e-27 | HMG1<br>B LY9     | -0.510051  | 0.588 | 0.746 | 4.630482e-23 | 20 |
| 3.196755e-27 | CHCHD2<br>B LY9   | -0.5442069 | 0.027 | 0.163 | 5.699495e-23 | 20 |
| 3.828966e-27 | SUSD3<br>B LY9    | -0.5721616 | 0.507 | 0.682 | 6.826664e-23 | 20 |
| 4.135304e-27 | SRSF3<br>B LY9    | -0.5874939 | 0.395 | 0.608 | 7.372834e-23 | 20 |

|              |                                |       |       |              |    |
|--------------|--------------------------------|-------|-------|--------------|----|
| 5.328584e-27 | DYNLL1<br>B LY9<br>-0.5548447  | 0.016 | 0.136 | 9.500333e-23 | 20 |
| 6.669601e-27 | NEIL1<br>B LY9<br>-0.7021894   | 0.025 | 0.154 | 1.189123e-22 | 20 |
| 8.956226e-27 | DUSP2<br>B LY9<br>0.6549036    | 0.584 | 0.461 | 1.596806e-22 | 20 |
| 1.464436e-26 | CD63<br>B LY9<br>-0.6189611    | 0.108 | 0.283 | 2.610944e-22 | 20 |
| 1.990229e-26 | SRM<br>B LY9<br>-0.4766682     | 0.525 | 0.71  | 3.548379e-22 | 20 |
| 2.452467e-26 | NDUFA4<br>B LY9<br>-0.5099037  | 0.353 | 0.562 | 4.372503e-22 | 20 |
| 2.855916e-26 | ATP5PF<br>B LY9<br>-0.4578183  | 0.351 | 0.57  | 5.091812e-22 | 20 |
| 2.892041e-26 | UQCRQ<br>B LY9<br>-0.5209074   | 0.205 | 0.432 | 5.156219e-22 | 20 |
| 3.323112e-26 | DNAJA1<br>B LY9<br>-0.5948297  | 0.846 | 0.9   | 5.924776e-22 | 20 |
| 4.410739e-26 | PFN1<br>B LY9<br>-0.461474     | 0.299 | 0.527 | 7.863906e-22 | 20 |
| 7.711485e-26 | FKBP1A<br>B LY9<br>-0.4637256  | 0.438 | 0.642 | 1.374881e-21 | 20 |
| 8.031805e-26 | ATP5MD<br>B LY9<br>0.4542216   | 0.865 | 0.815 | 1.431991e-21 | 20 |
| 1.039417e-25 | NOP53<br>B LY9<br>-0.5008928   | 0.129 | 0.326 | 1.853177e-21 | 20 |
| 1.225929e-25 | IMP4<br>B LY9<br>-0.9597405    | 0.047 | 0.184 | 2.185709e-21 | 20 |
| 1.532747e-25 | XBP1<br>B LY9<br>-0.4522976    | 0.018 | 0.134 | 2.732735e-21 | 20 |
| 2.496698e-25 | CYTOR<br>B LY9<br>-0.4012189   | 0.013 | 0.116 | 4.451363e-21 | 20 |
| 2.504726e-25 | PYCR1<br>B LY9<br>-0.5262914   | 0.452 | 0.643 | 4.465675e-21 | 20 |
| 3.371293e-25 | ERH<br>B LY9<br>-0.9312821     | 0.52  | 0.668 | 6.010679e-21 | 20 |
| 5.424229e-25 | TUBA1B<br>B LY9<br>0.639324    | 0.618 | 0.533 | 9.670859e-21 | 20 |
| 6.113482e-25 | ATP6V1F<br>B LY9<br>-0.4242122 | 0.516 | 0.703 | 1.089973e-20 | 20 |
| 6.789748e-25 | ELOB<br>B LY9<br>-0.5223656    | 0.387 | 0.582 | 1.210544e-20 | 20 |
| 8.336461e-25 | LDHB<br>B LY9<br>-0.437472     | 0.285 | 0.501 | 1.486308e-20 | 20 |
| 1.021887e-24 | COX5A<br>B LY9<br>-0.329166    | 0.006 | 0.101 | 1.821922e-20 | 20 |
| 1.168109e-24 | FAM241A<br>B LY9<br>0.3027987  | 0.936 | 0.867 | 2.082621e-20 | 20 |
| 2.258844e-24 | CD52<br>B LY9<br>-0.4673957    | 0.441 | 0.631 | 4.027293e-20 | 20 |

|              |                |            |       |       |              |    |
|--------------|----------------|------------|-------|-------|--------------|----|
| 2.554109e-24 | ATP5F1B B LY9  | -0.5372211 | 0.385 | 0.574 | 4.55372e-20  | 20 |
| 2.625892e-24 | SNRPE B LY9    | -0.5295867 | 0.218 | 0.429 | 4.681703e-20 | 20 |
| 4.153934e-24 | CD40 B LY9     | -0.5582219 | 0.103 | 0.287 | 7.406049e-20 | 20 |
| 4.271551e-24 | CD82 B LY9     | -0.5853853 | 0.055 | 0.193 | 7.615749e-20 | 20 |
| 5.514186e-24 | DAAM1 B LY9    | -0.4547046 | 0.198 | 0.408 | 9.831242e-20 | 20 |
| 5.896677e-24 | PSMB2 B LY9    | -0.4934589 | 0.244 | 0.445 | 1.051319e-19 | 20 |
| 7.048934e-24 | PPA1 B LY9     | -0.4949418 | 0.242 | 0.452 | 1.256755e-19 | 20 |
| 8.097626e-24 | SEM1 B LY9     | -0.5123711 | 0.195 | 0.392 | 1.443726e-19 | 20 |
| 8.938428e-24 | CCT5 B LY9     | -0.4533665 | 0.212 | 0.423 | 1.593632e-19 | 20 |
| 9.961032e-24 | TOMM22 B LY9   | -0.4722739 | 0.456 | 0.643 | 1.775952e-19 | 20 |
| 1.123609e-23 | ATP5MF B LY9   | -0.4066467 | 0.831 | 0.906 | 2.003283e-19 | 20 |
| 1.838096e-23 | ATP5F1E B LY9  | -0.5897841 | 0.3   | 0.488 | 3.277141e-19 | 20 |
| 1.853517e-23 | RANBP1 B LY9   | -0.4223092 | 0.181 | 0.389 | 3.304635e-19 | 20 |
| 2.227797e-23 | SNRPC B LY9    | -0.5205595 | 0.195 | 0.395 | 3.97194e-19  | 20 |
| 3.608536e-23 | FBNP1 B LY9    | -0.5738551 | 0.61  | 0.75  | 6.433659e-19 | 20 |
| 4.09034e-23  | HSP90AA1 B LY9 | -0.5717072 | 0.982 | 0.99  | 7.292668e-19 | 20 |
| 4.308339e-23 | ACTB B LY9     | -0.4848298 | 0.55  | 0.706 | 7.681338e-19 | 20 |
| 4.85581e-23  | TPI1 B LY9     | -0.4616663 | 0.227 | 0.434 | 8.657424e-19 | 20 |
| 6.373385e-23 | SLIRP B LY9    | -0.5244021 | 0.275 | 0.471 | 1.136311e-18 | 20 |
| 6.833969e-23 | CYCS B LY9     | -0.7421204 | 0.856 | 0.888 | 1.218428e-18 | 20 |
| 7.025725e-23 | GAPDH B LY9    | -0.5748763 | 0.373 | 0.562 | 1.252616e-18 | 20 |
| 8.795752e-23 | NCL B LY9      | -0.5369903 | 0.363 | 0.555 | 1.568195e-18 | 20 |
| 1.149895e-22 | TCEA1 B LY9    | -0.3837966 | 0.033 | 0.17  | 2.050149e-18 | 20 |
| 1.2291e-22   | CCDC167 B LY9  | -0.4973384 | 0.238 | 0.438 | 2.191362e-18 | 20 |
| 1.348911e-22 | EIF5B B LY9    | -0.5689818 | 0.763 | 0.853 | 2.404973e-18 | 20 |

|              |            |       |       |              |    |
|--------------|------------|-------|-------|--------------|----|
| ATP5MG       | B LY9      |       |       |              |    |
| 1.360671e-22 | -0.7258669 | 0.411 | 0.579 | 2.425941e-18 | 20 |
| TUBB         | B LY9      |       |       |              |    |
| 1.462309e-22 | -0.3595251 | 0.018 | 0.127 | 2.60715e-18  | 20 |
| SLC1A5       | B LY9      |       |       |              |    |
| 1.574208e-22 | -0.3728742 | 0.008 | 0.102 | 2.806655e-18 | 20 |
| MYBL2        | B LY9      |       |       |              |    |
| 1.671741e-22 | -0.4190186 | 0.106 | 0.284 | 2.980546e-18 | 20 |
| PSMD14       | B LY9      |       |       |              |    |
| 2.275475e-22 | -0.4005613 | 0.084 | 0.251 | 4.056945e-18 | 20 |
| MRPL13       | B LY9      |       |       |              |    |
| 2.308374e-22 | -0.5152027 | 0.133 | 0.306 | 4.115599e-18 | 20 |
| ODC1         | B LY9      |       |       |              |    |
| 2.514592e-22 | -0.427216  | 0.237 | 0.449 | 4.483266e-18 | 20 |
| ATP5F1C      | B LY9      |       |       |              |    |
| 2.780523e-22 | -0.4166502 | 0.445 | 0.635 | 4.957395e-18 | 20 |
| COX7B        | B LY9      |       |       |              |    |
| 2.822439e-22 | -0.4236964 | 0.508 | 0.688 | 5.032127e-18 | 20 |
| COX6A1       | B LY9      |       |       |              |    |
| 2.826256e-22 | -0.4861666 | 0.258 | 0.46  | 5.038932e-18 | 20 |
| COX17        | B LY9      |       |       |              |    |
| 3.259923e-22 | -0.4815942 | 0.102 | 0.274 | 5.812116e-18 | 20 |
| SMS          | B LY9      |       |       |              |    |
| 4.674628e-22 | 0.5930158  | 0.21  | 0.12  | 8.334395e-18 | 20 |
| ZNF318       | B LY9      |       |       |              |    |
| 8.894963e-22 | -0.4349576 | 0.373 | 0.574 | 1.585883e-17 | 20 |
| RBM8A        | B LY9      |       |       |              |    |
| 9.524732e-22 | -0.4206043 | 0.3   | 0.506 | 1.698164e-17 | 20 |
| XRCC5        | B LY9      |       |       |              |    |
| 1.078502e-21 | -0.3944682 | 0.467 | 0.66  | 1.922861e-17 | 20 |
| RBX1         | B LY9      |       |       |              |    |
| 1.234692e-21 | -0.4658426 | 0.255 | 0.452 | 2.201333e-17 | 20 |
| ILF2         | B LY9      |       |       |              |    |
| 1.404997e-21 | -0.4100592 | 0.313 | 0.517 | 2.504968e-17 | 20 |
| SSBP1        | B LY9      |       |       |              |    |
| 1.452312e-21 | -0.4767781 | 0.268 | 0.466 | 2.589327e-17 | 20 |
| PRMT1        | B LY9      |       |       |              |    |
| 1.512426e-21 | -0.6250999 | 0.241 | 0.411 | 2.696505e-17 | 20 |
| TXN          | B LY9      |       |       |              |    |
| 1.563378e-21 | -0.4141066 | 0.317 | 0.526 | 2.787348e-17 | 20 |
| SELENOT      | B LY9      |       |       |              |    |
| 1.686981e-21 | -0.4394187 | 0.28  | 0.479 | 3.007718e-17 | 20 |
| PRELID1      | B LY9      |       |       |              |    |
| 1.942242e-21 | -0.4130782 | 0.125 | 0.306 | 3.462823e-17 | 20 |
| GLRX3        | B LY9      |       |       |              |    |
| 2.738133e-21 | 0.5287328  | 0.605 | 0.492 | 4.881817e-17 | 20 |
| FXYD5        | B LY9      |       |       |              |    |
| 2.901828e-21 | -0.4977557 | 0.49  | 0.66  | 5.17367e-17  | 20 |
| SLC25A5      | B LY9      |       |       |              |    |
| 3.004501e-21 | -0.4800101 | 0.367 | 0.557 | 5.356724e-17 | 20 |

|              |            |       |       |              |    |  |
|--------------|------------|-------|-------|--------------|----|--|
| SEC61G       | B LY9      |       |       |              |    |  |
| 3.061434e-21 | -0.4494854 | 0.428 | 0.608 | 5.458231e-17 | 20 |  |
| RBM3         | B LY9      |       |       |              |    |  |
| 3.541742e-21 | 0.5560411  | 0.45  | 0.335 | 6.314573e-17 | 20 |  |
| CD48         | B LY9      |       |       |              |    |  |
| 3.841122e-21 | -0.5628205 | 0.101 | 0.271 | 6.848336e-17 | 20 |  |
| PIM1         | B LY9      |       |       |              |    |  |
| 3.958811e-21 | -0.4381588 | 0.258 | 0.46  | 7.058163e-17 | 20 |  |
| SFPQ         | B LY9      |       |       |              |    |  |
| 4.73157e-21  | -0.3978217 | 0.475 | 0.656 | 8.435917e-17 | 20 |  |
| UBE2D3       | B LY9      |       |       |              |    |  |
| 5.163126e-21 | -0.4269146 | 0.195 | 0.391 | 9.205337e-17 | 20 |  |
| NDUFS6       | B LY9      |       |       |              |    |  |
| 6.483158e-21 | -0.4030733 | 0.076 | 0.228 | 1.155882e-16 | 20 |  |
| DCAF13       | B LY9      |       |       |              |    |  |
| 7.126798e-21 | -0.3819539 | 0.316 | 0.522 | 1.270637e-16 | 20 |  |
| PSMB6        | B LY9      |       |       |              |    |  |
| 7.477696e-21 | -0.7211371 | 0.058 | 0.192 | 1.333198e-16 | 20 |  |
| PTTG1        | B LY9      |       |       |              |    |  |
| 9.52594e-21  | -0.4157918 | 0.186 | 0.377 | 1.69838e-16  | 20 |  |
| PSMC3        | B LY9      |       |       |              |    |  |
| 9.868031e-21 | -0.4692256 | 0.244 | 0.431 | 1.759371e-16 | 20 |  |
| CCT2         | B LY9      |       |       |              |    |  |
| 1.316239e-20 | -0.530367  | 0.235 | 0.42  | 2.346723e-16 | 20 |  |
| METAP2       | B LY9      |       |       |              |    |  |
| 1.330554e-20 | -0.4119398 | 0.237 | 0.438 | 2.372245e-16 | 20 |  |
| ROM01        | B LY9      |       |       |              |    |  |
| 1.458084e-20 | -0.3971404 | 0.101 | 0.273 | 2.599618e-16 | 20 |  |
| TOP1         | B LY9      |       |       |              |    |  |
| 1.654876e-20 | -0.4722132 | 0.351 | 0.538 | 2.950478e-16 | 20 |  |
| SRSF9        | B LY9      |       |       |              |    |  |
| 1.893516e-20 | -0.3826888 | 0.154 | 0.341 | 3.37595e-16  | 20 |  |
| HSD17B10     | B LY9      |       |       |              |    |  |
| 1.89481e-20  | -0.3923329 | 0.353 | 0.553 | 3.378257e-16 | 20 |  |
| PSMA1        | B LY9      |       |       |              |    |  |
| 1.899035e-20 | -0.4550218 | 0.101 | 0.265 | 3.385789e-16 | 20 |  |
| ANP32E       | B LY9      |       |       |              |    |  |
| 2.292794e-20 | -0.4173832 | 0.865 | 0.92  | 4.087823e-16 | 20 |  |
| CFL1         | B LY9      |       |       |              |    |  |
| 2.613145e-20 | -0.4352941 | 0.221 | 0.414 | 4.658976e-16 | 20 |  |
| HNRNPR       | B LY9      |       |       |              |    |  |
| 3.391591e-20 | -0.3510425 | 0.52  | 0.686 | 6.046868e-16 | 20 |  |
| SLC25A3      | B LY9      |       |       |              |    |  |
| 3.413061e-20 | -0.539004  | 0.343 | 0.515 | 6.085147e-16 | 20 |  |
| PA2G4        | B LY9      |       |       |              |    |  |
| 3.437024e-20 | -0.415063  | 0.208 | 0.402 | 6.12787e-16  | 20 |  |
| PSMA3        | B LY9      |       |       |              |    |  |
| 3.481377e-20 | -0.4011365 | 0.16  | 0.349 | 6.206947e-16 | 20 |  |
| LSM6         | B LY9      |       |       |              |    |  |
| 3.845393e-20 | -0.4011993 | 0.14  | 0.326 | 6.855952e-16 | 20 |  |



|              |         |       |            |       |       |              |    |
|--------------|---------|-------|------------|-------|-------|--------------|----|
| 4.1727e-20   | HSBP1   | B LY9 | 0.5565495  | 0.269 | 0.178 | 7.439507e-16 | 20 |
| 4.718156e-20 | HEXA    | B LY9 | -0.3966736 | 0.034 | 0.144 | 8.412001e-16 | 20 |
| 5.267777e-20 | NOP16   | B LY9 | -0.3812546 | 0.205 | 0.405 | 9.39192e-16  | 20 |
| 5.41417e-20  | UQCRFS1 | B LY9 | -0.4015553 | 0.058 | 0.185 | 9.652924e-16 | 20 |
| 5.465125e-20 | TUBA1C  | B LY9 | 0.5629334  | 0.388 | 0.277 | 9.743771e-16 | 20 |
| 7.005942e-20 | IFITM2  | B LY9 | -0.4103018 | 0.047 | 0.184 | 1.249089e-15 | 20 |
| 8.126283e-20 | RASGRP3 | B LY9 | -0.3790577 | 0.071 | 0.22  | 1.448835e-15 | 20 |
| 8.145171e-20 | MRPL12  | B LY9 | -0.3776567 | 0.201 | 0.398 | 1.452202e-15 | 20 |
| 8.708145e-20 | NDUFAB1 | B LY9 | -0.4090243 | 0.059 | 0.206 | 1.552575e-15 | 20 |
| 9.587514e-20 | UBALD2  | B LY9 | -0.3528091 | 0.035 | 0.156 | 1.709358e-15 | 20 |
| 9.950321e-20 | PAICS   | B LY9 | -0.3814833 | 0.407 | 0.597 | 1.774043e-15 | 20 |
| 1.049895e-19 | SRSF2   | B LY9 | -0.419565  | 0.232 | 0.423 | 1.871858e-15 | 20 |
| 1.204069e-19 | EIF6    | B LY9 | -0.4221635 | 0.585 | 0.725 | 2.146734e-15 | 20 |
| 1.240623e-19 | COX6C   | B LY9 | -0.4218482 | 0.256 | 0.445 | 2.211907e-15 | 20 |
| 1.393757e-19 | CCT6A   | B LY9 | -0.3775126 | 0.156 | 0.343 | 2.48493e-15  | 20 |
| 1.452219e-19 | STRAP   | B LY9 | -0.3863834 | 0.232 | 0.43  | 2.589161e-15 | 20 |
| 1.505223e-19 | MINOS1  | B LY9 | -0.5163509 | 0.435 | 0.599 | 2.683662e-15 | 20 |
| 1.726438e-19 | LDHA    | B LY9 | -0.389725  | 0.129 | 0.309 | 3.078066e-15 | 20 |
| 1.924092e-19 | TIMM8B  | B LY9 | -0.4762909 | 0.065 | 0.209 | 3.430463e-15 | 20 |
| 2.190309e-19 | EAF2    | B LY9 | -0.5452688 | 0.16  | 0.32  | 3.905102e-15 | 20 |
| 2.197324e-19 | DDX21   | B LY9 | 0.5095459  | 0.208 | 0.113 | 3.917609e-15 | 20 |
| 2.257675e-19 | CLN8    | B LY9 | -1.29039   | 0.054 | 0.177 | 4.025208e-15 | 20 |
| 2.300481e-19 | MZB1    | B LY9 | -0.399938  | 0.314 | 0.507 | 4.101527e-15 | 20 |
| 2.5916e-19   | EIF3I   | B LY9 | -0.4473365 | 0.269 | 0.455 | 4.620563e-15 | 20 |
| 2.705365e-19 | MRPL51  | B LY9 | -0.4449761 | 0.262 | 0.442 | 4.823394e-15 | 20 |

|              |                |                |               |       |              |              |     |
|--------------|----------------|----------------|---------------|-------|--------------|--------------|-----|
| 3.186883e-19 | HMGA1<br>SIAH2 | B LY9<br>B LY9 | -0.4347837    | 0.079 | 0.226        | 5.681894e-15 | 20  |
| 3.70624e-19  | BZW1           | B LY9          | -0.4015531    | 0.21  | 0.406        | 6.607856e-15 | 20  |
| 3.941839e-19 | MT-ND3         | B LY9          | 0.3027902     | 0.986 | 0.968        | 7.027904e-15 | 20  |
| 5.686339e-19 | PSMB1          | B LY9          | -0.4182118    | 0.499 | 0.659        | 1.013817e-14 | 20  |
| 6.864804e-19 | AC023590.1     | B LY9          | -0.3559445    | 0.017 | 0.113        | 1.223926e-14 | 20  |
| 7.458487e-19 | UBE2L3         | B LY9          | -0.4016898    | 0.297 | 0.488        | 1.329774e-14 | 20  |
| 7.966279e-19 | PSMD8          | B LY9          | -0.3640379    | 0.319 | 0.513        | 1.420308e-14 | 20  |
| 8.946825e-19 | PPP1R14B       | B LY9          | -0.3469849    | 0.047 | 0.164        | 1.595129e-14 | 20  |
| 9.805771e-19 | TIMM13         | B LY9          | -0.448164     | 0.176 | 0.352        | 1.748271e-14 | 20  |
| 1.00486e-18  | TIMM17A        | B LY9          | -0.3603976    | 0.078 | 0.229        | 1.791565e-14 | 20  |
| 1.012824e-18 | TRAF4          | B LY9          | -0.4432873    | 0.078 | 0.222        | 1.805764e-14 | 20  |
| 1.017504e-18 | CCT7           | B LY9          | -0.3866425    | 0.254 | 0.447        | 1.814108e-14 | 20  |
| 1.238152e-18 | AMDHD2         | B LY9          | 0.4149628     | 0.133 | 0.06         | 2.207502e-14 | 20  |
| 1.275474e-18 | SLC2A3         | B LY9          | 0.5042597     | 0.266 | 0.156        | 2.274043e-14 | 20  |
| 1.29226e-18  | MCTS1          | B LY9          | -0.3524876    | 0.093 | 0.254        | 2.30397e-14  | 20  |
| 1.321332e-18 | SERBP1         | B LY9          | -0.4262055    | 0.446 | 0.619        | 2.355803e-14 | 20  |
| 1.34094e-18  | PSMB3          | B LY9          | -0.3997114    | 0.435 | 0.607        | 2.390761e-14 | 20  |
| 1.684117e-18 | B LY9          |                | -1.11318 0.36 | 0.491 | 3.002612e-14 | 20           | LTB |
| 1.789769e-18 | NUTF2          | B LY9          | -0.3593821    | 0.075 | 0.222        | 3.190979e-14 | 20  |
| 2.560012e-18 | NFKBIA         | B LY9          | -0.5527335    | 0.142 | 0.298        | 4.564245e-14 | 20  |
| 2.602415e-18 | CCDC88A        | B LY9          | -0.4358116    | 0.044 | 0.17         | 4.639845e-14 | 20  |
| 3.181825e-18 | PMAIP1         | B LY9          | -0.4816548    | 0.166 | 0.329        | 5.672876e-14 | 20  |
| 3.49233e-18  | VDAC1          | B LY9          | -0.4052859    | 0.273 | 0.455        | 6.226476e-14 | 20  |
| 3.659836e-18 | TUFM           | B LY9          | -0.3632211    | 0.31  | 0.501        | 6.525121e-14 | 20  |
| 3.927691e-18 |                |                | -0.4881183    | 0.418 | 0.619        | 7.00268e-14  | 20  |

|              |          |       |            |       |       |              |    |
|--------------|----------|-------|------------|-------|-------|--------------|----|
| 6.458274e-18 | MEF2C    | B LY9 | -0.4155403 | 0.034 | 0.138 | 1.151446e-13 | 20 |
| 7.346987e-18 | PSAT1    | B LY9 | -0.3889304 | 0.099 | 0.248 | 1.309894e-13 | 20 |
| 7.449378e-18 | AK2      | B LY9 | 0.4043819  | 0.765 | 0.696 | 1.32815e-13  | 20 |
| 8.084793e-18 | HLA-DQB1 | B LY9 | -0.3729987 | 0.106 | 0.267 | 1.441438e-13 | 20 |
| 8.42479e-18  | SYNCRIP  | B LY9 | -0.495116  | 0.096 | 0.245 | 1.502056e-13 | 20 |
| 9.355794e-18 | KPNA2    | B LY9 | -0.3191489 | 0.678 | 0.809 | 1.668045e-13 | 20 |
| 1.037365e-17 | TMA7     | B LY9 | -0.3964117 | 0.484 | 0.647 | 1.849519e-13 | 20 |
| 1.095435e-17 | HNRNPC   | B LY9 | -0.5022307 | 0.194 | 0.355 | 1.953052e-13 | 20 |
| 1.251033e-17 | TUBB4B   | B LY9 | -0.4927635 | 0.933 | 0.942 | 2.230466e-13 | 20 |
| 1.287544e-17 | YBX1     | B LY9 | -0.3310256 | 0.068 | 0.205 | 2.295563e-13 | 20 |
| 1.384197e-17 | MRPL23   | B LY9 | -0.4090358 | 0.164 | 0.338 | 2.467884e-13 | 20 |
| 1.810929e-17 | VOPP1    | B LY9 | -0.4344772 | 0.425 | 0.586 | 3.228706e-13 | 20 |
| 1.827174e-17 | ANP32B   | B LY9 | -0.4306972 | 0.079 | 0.22  | 3.257669e-13 | 20 |
| 1.979398e-17 | NANS     | B LY9 | -0.3600123 | 0.261 | 0.454 | 3.529069e-13 | 20 |
| 1.987044e-17 | VCP      | B LY9 | -0.3368466 | 0.47  | 0.65  | 3.5427e-13   | 20 |
| 2.127673e-17 | UQCR11   | B LY9 | -0.3415009 | 0.421 | 0.604 | 3.793427e-13 | 20 |
| 2.273488e-17 | PSMA2    | B LY9 | -0.3470457 | 0.443 | 0.62  | 4.053401e-13 | 20 |
| 2.644177e-17 | NDUFA13  | B LY9 | -0.4223523 | 0.35  | 0.532 | 4.714303e-13 | 20 |
| 2.687399e-17 | SRSF7    | B LY9 | -0.3454316 | 0.065 | 0.198 | 4.791363e-13 | 20 |
| 2.821794e-17 | GTPBP4   | B LY9 | -0.3351576 | 0.38  | 0.581 | 5.030977e-13 | 20 |
| 2.899489e-17 | POU2F2   | B LY9 | -0.3730967 | 0.296 | 0.487 | 5.1695e-13   | 20 |
| 2.972937e-17 | GTF3A    | B LY9 | -0.3576683 | 0.323 | 0.505 | 5.30045e-13  | 20 |
| 2.978307e-17 | NDUFA11  | B LY9 | -0.3717464 | 0.027 | 0.125 | 5.310024e-13 | 20 |
| 3.082922e-17 | PLEK     | B LY9 | 0.5338661  | 0.462 | 0.385 | 5.496541e-13 | 20 |
| 3.294589e-17 | PSAP     | B LY9 | -0.4043554 | 0.025 | 0.12  | 5.873923e-13 | 20 |

|              |                     |            |       |       |              |        |
|--------------|---------------------|------------|-------|-------|--------------|--------|
| 3.84135e-17  | UBE2S<br>B LY9      | -0.410547  | 0.143 | 0.304 | 6.848742e-13 | 20     |
| 4.671423e-17 | NOP58<br>B LY9      | -0.3684752 | 0.191 | 0.37  | 8.328679e-13 | 20     |
| 5.319782e-17 | EWSR1<br>B LY9      | -0.3571906 | 0.133 | 0.292 | 9.48464e-13  | 20     |
| 5.594366e-17 | DCTPP1<br>B LY9     | 0.5139425  | 0.38  | 0.282 | 9.974195e-13 | 20     |
| 6.004885e-17 | GNG7<br>B LY9       | -0.332763  | 0.106 | 0.264 | 1.070611e-12 | 20     |
| 6.439465e-17 | PSMC2<br>B LY9      | -0.3886054 | 0.174 | 0.35  | 1.148092e-12 | 20     |
| 6.695696e-17 | RBM17<br>B LY9      | 0.511768   | 0.61  | 0.521 | 1.193776e-12 | 20 ID3 |
| 7.376434e-17 | COX6B1<br>B LY9     | -0.3091686 | 0.565 | 0.719 | 1.315144e-12 | 20     |
| 8.32479e-17  | AC073111.5<br>B LY9 | 0.4572814  | 0.157 | 0.089 | 1.484227e-12 | 20     |
| 8.890866e-17 | CAPZA1<br>B LY9     | -0.3798142 | 0.265 | 0.459 | 1.585152e-12 | 20     |
| 1.014827e-16 | TKT<br>B LY9        | -0.3583006 | 0.19  | 0.363 | 1.809335e-12 | 20     |
| 1.102221e-16 | PSMB5<br>B LY9      | -0.3437794 | 0.084 | 0.225 | 1.96515e-12  | 20     |
| 1.130209e-16 | PSMD7<br>B LY9      | -0.3774983 | 0.2   | 0.374 | 2.015049e-12 | 20     |
| 1.463719e-16 | AHSA1<br>B LY9      | -0.3524005 | 0.14  | 0.304 | 2.609665e-12 | 20     |
| 1.587671e-16 | CCR6<br>B LY9       | 0.4862101  | 0.174 | 0.089 | 2.830659e-12 | 20     |
| 1.725581e-16 | ARRDC2<br>B LY9     | 0.4600266  | 0.246 | 0.146 | 3.076538e-12 | 20     |
| 1.73769e-16  | GPX4<br>B LY9       | 0.4586332  | 0.697 | 0.634 | 3.098127e-12 | 20     |
| 1.988757e-16 | BUD31<br>B LY9      | -0.3653924 | 0.173 | 0.34  | 3.545755e-12 | 20     |
| 2.353969e-16 | CCT4<br>B LY9       | -0.3468634 | 0.249 | 0.43  | 4.196891e-12 | 20     |
| 2.747522e-16 | PPIA<br>B LY9       | -0.3416252 | 0.827 | 0.896 | 4.898556e-12 | 20     |
| 2.878711e-16 | CKS2<br>B LY9       | -0.441476  | 0.092 | 0.233 | 5.132453e-12 | 20     |
| 3.085624e-16 | EBNA1BP2<br>B LY9   | -0.3520855 | 0.071 | 0.2   | 5.501359e-12 | 20     |
| 3.098578e-16 | PARP1<br>B LY9      | -0.425534  | 0.373 | 0.543 | 5.524455e-12 | 20     |
| 3.337235e-16 | NDUFB8<br>B LY9     | -0.3203036 | 0.339 | 0.526 | 5.949957e-12 | 20     |
| 3.630692e-16 |                     | -0.3517776 | 0.153 | 0.316 | 6.473161e-12 | 20     |

|              |                  |            |       |       |              |    |
|--------------|------------------|------------|-------|-------|--------------|----|
| 3.825664e-16 | STOML2<br>B LY9  | -0.3336269 | 0.295 | 0.48  | 6.820777e-12 | 20 |
| 3.877332e-16 | UBE2N<br>B LY9   | -0.3478175 | 0.479 | 0.644 | 6.912895e-12 | 20 |
| 3.970543e-16 | HNRNPM<br>B LY9  | -0.3181936 | 0.018 | 0.113 | 7.07908e-12  | 20 |
| 4.03176e-16  | CPNE5<br>B LY9   | -0.3367772 | 0.176 | 0.352 | 7.188226e-12 | 20 |
| 4.569986e-16 | POLR2K<br>B LY9  | -0.3658899 | 0.18  | 0.349 | 8.147827e-12 | 20 |
| 4.584839e-16 | H2AFY<br>B LY9   | -0.3568867 | 0.159 | 0.322 | 8.17431e-12  | 20 |
| 5.446612e-16 | RHOG<br>B LY9    | -0.344106  | 0.414 | 0.588 | 9.710764e-12 | 20 |
| 6.470778e-16 | EIF2S2<br>B LY9  | -0.3455209 | 0.095 | 0.238 | 1.153675e-11 | 20 |
| 7.293946e-16 | BUD23<br>B LY9   | -0.3341286 | 0.266 | 0.447 | 1.300438e-11 | 20 |
| 8.650801e-16 | ATP5MC1<br>B LY9 | -0.4129229 | 0.205 | 0.364 | 1.542351e-11 | 20 |
| 9.626559e-16 | HSPA9<br>B LY9   | -0.3106577 | 0.055 | 0.178 | 1.716319e-11 | 20 |
| 9.667799e-16 | SSSCA1<br>B LY9  | -0.3664989 | 0.099 | 0.24  | 1.723672e-11 | 20 |
| 1.148993e-15 | HNRNPAB<br>B LY9 | -0.319175  | 0.187 | 0.356 | 2.048539e-11 | 20 |
| 1.20895e-15  | PHB2<br>B LY9    | -0.3300045 | 0.161 | 0.334 | 2.155437e-11 | 20 |
| 1.212546e-15 | COPZ1<br>B LY9   | -0.3527773 | 0.357 | 0.536 | 2.161848e-11 | 20 |
| 1.257582e-15 | SOD1<br>B LY9    | 0.4363044  | 0.652 | 0.542 | 2.242143e-11 | 20 |
| 1.573692e-15 | CCR7<br>B LY9    | -0.3376037 | 0.225 | 0.403 | 2.805736e-11 | 20 |
| 1.576855e-15 | ENY2<br>B LY9    | 0.3936635  | 0.122 | 0.057 | 2.811374e-11 | 20 |
| 1.736916e-15 | CRIP3<br>B LY9   | -0.3689719 | 0.232 | 0.395 | 3.096747e-11 | 20 |
| 1.826973e-15 | PHB<br>B LY9     | -0.3837432 | 0.211 | 0.377 | 3.257311e-11 | 20 |
| 1.837393e-15 | LCP1<br>B LY9    | -0.3401032 | 0.399 | 0.568 | 3.275888e-11 | 20 |
| 2.026302e-15 | SNRPB<br>B LY9   | -0.3112739 | 0.04  | 0.138 | 3.612694e-11 | 20 |
| 2.041135e-15 | IFRD2<br>B LY9   | -0.3273267 | 0.215 | 0.393 | 3.639139e-11 | 20 |
| 2.225913e-15 | ARPC4<br>B LY9   | -0.4438737 | 0.592 | 0.727 | 3.96858e-11  | 20 |
| 2.264352e-15 | LIMD2<br>B LY9   | -0.4281565 | 0.269 | 0.426 | 4.037114e-11 | 20 |

|              |         |       |       |       |              |    |
|--------------|---------|-------|-------|-------|--------------|----|
| 4.323017e-15 | DEK     | B LY9 | 0.069 | 0.179 | 7.707506e-11 | 20 |
| 6.284236e-15 | BCL2A1  | B LY9 | 0.048 | 0.158 | 1.120417e-10 | 20 |
| 6.816724e-15 | GAR1    | B LY9 | 0.344 | 0.51  | 1.215354e-10 | 20 |
| 7.112225e-15 | MZT2B   | B LY9 | 0.276 | 0.452 | 1.268039e-10 | 20 |
| 9.423822e-15 | SF3B5   | B LY9 | 0.072 | 0.19  | 1.680173e-10 | 20 |
| 1.062179e-14 | GPATCH4 | B LY9 | 0.057 | 0.167 | 1.893758e-10 | 20 |
| 1.083937e-14 | DEF8    | B LY9 | 0.067 | 0.184 | 1.932551e-10 | 20 |
| 1.322011e-14 | CMSS1   | B LY9 | 0.024 | 0.11  | 2.357013e-10 | 20 |
| 1.375806e-14 | VPREB3  | B LY9 | 0.178 | 0.34  | 2.452924e-10 | 20 |
| 1.711527e-14 | MIF     | B LY9 | 0.127 | 0.275 | 3.051481e-10 | 20 |
| 1.793319e-14 | NAA10   | B LY9 | 0.129 | 0.277 | 3.197309e-10 | 20 |
| 1.969222e-14 | NDUFAF8 | B LY9 | 0.057 | 0.164 | 3.510926e-10 | 20 |
| 2.025839e-14 | CD58    | B LY9 | 0.194 | 0.351 | 3.611869e-10 | 20 |
| 2.119883e-14 | S100A10 | B LY9 | 0.163 | 0.319 | 3.779539e-10 | 20 |
| 2.476283e-14 | TCP1    | B LY9 | 0.7   | 0.807 | 4.414966e-10 | 20 |
| 2.720282e-14 | CALM2   | B LY9 | 0.106 | 0.244 | 4.84999e-10  | 20 |
| 2.822988e-14 | POLD2   | B LY9 | 0.071 | 0.188 | 5.033105e-10 | 20 |
| 3.096098e-14 | WDR43   | B LY9 | 0.722 | 0.787 | 5.520032e-10 | 20 |
| 3.125031e-14 | ACTG1   | B LY9 | 0.279 | 0.194 | 5.571618e-10 | 20 |
| 3.405355e-14 | CLEC2B  | B LY9 | 0.497 | 0.639 | 6.071408e-10 | 20 |
| 3.474641e-14 | SET     | B LY9 | 0.059 | 0.171 | 6.194938e-10 | 20 |
| 3.739041e-14 | SMC4    | B LY9 | 0.203 | 0.369 | 6.666336e-10 | 20 |
| 4.199134e-14 | PSMA5   | B LY9 | 0.05  | 0.15  | 7.486637e-10 | 20 |
| 5.158378e-14 | TSEN15  | B LY9 | 0.293 | 0.447 | 9.196872e-10 | 20 |
| 5.434513e-14 | C1QBP   | B LY9 | 0.255 | 0.422 | 9.689193e-10 | 20 |

|              |                  |            |       |       |              |    |
|--------------|------------------|------------|-------|-------|--------------|----|
| 5.832001e-14 | HNRNPD<br>B LY9  | -0.3039554 | 0.252 | 0.421 | 1.039787e-09 | 20 |
| 5.892175e-14 | NDUFA12<br>B LY9 | -0.3347265 | 0.071 | 0.186 | 1.050516e-09 | 20 |
| 5.949512e-14 | FKBP4<br>B LY9   | -1.381992  | 0.194 | 0.304 | 1.060738e-09 | 20 |
| 6.039359e-14 | HMGB2<br>B LY9   | -0.3466154 | 0.119 | 0.253 | 1.076757e-09 | 20 |
| 6.10712e-14  | GARS<br>B LY9    | 0.4393949  | 0.358 | 0.278 | 1.088838e-09 | 20 |
| 6.377971e-14 | RNASET2<br>B LY9 | -0.3212218 | 0.176 | 0.335 | 1.137128e-09 | 20 |
| 6.779251e-14 | EIF3A<br>B LY9   | -0.336178  | 0.079 | 0.212 | 1.208673e-09 | 20 |
| 7.171833e-14 | EHD1<br>B LY9    | -0.3244067 | 0.065 | 0.174 | 1.278666e-09 | 20 |
| 7.249767e-14 | ASNS<br>B LY9    | -0.301155  | 0.241 | 0.41  | 1.292561e-09 | 20 |
| 7.354741e-14 | BANF1<br>B LY9   | -0.3626799 | 0.207 | 0.368 | 1.311277e-09 | 20 |
| 7.619709e-14 | PDIA3<br>B LY9   | -0.3149271 | 0.091 | 0.225 | 1.358518e-09 | 20 |
| 8.116593e-14 | HSPH1<br>B LY9   | -0.3138626 | 0.079 | 0.203 | 1.447107e-09 | 20 |
| 9.092499e-14 | TOMM40<br>B LY9  | -0.3094269 | 0.22  | 0.39  | 1.621102e-09 | 20 |
| 9.672736e-14 | MRPL20<br>B LY9  | -0.3930183 | 0.5   | 0.634 | 1.724552e-09 | 20 |
| 1.174818e-13 | GSTP1<br>B LY9   | -0.3798936 | 0.164 | 0.312 | 2.094583e-09 | 20 |
| 1.447873e-13 | CALM3<br>B LY9   | -0.3273499 | 0.059 | 0.166 | 2.581414e-09 | 20 |
| 1.567626e-13 | NFKB1<br>B LY9   | -0.3769768 | 0.275 | 0.442 | 2.79492e-09  | 20 |
| 1.627744e-13 | RHOH<br>B LY9    | -0.3011201 | 0.5   | 0.655 | 2.902105e-09 | 20 |
| 1.815771e-13 | YWHAB<br>B LY9   | -0.3058092 | 0.293 | 0.459 | 3.237338e-09 | 20 |
| 1.962293e-13 | LSM5<br>B LY9    | 0.4875463  | 0.397 | 0.328 | 3.498571e-09 | 20 |
| 2.324162e-13 | SMC6<br>B LY9    | 0.4903542  | 0.29  | 0.209 | 4.143749e-09 | 20 |
| 2.370692e-13 | MGST3<br>B LY9   | -0.4443421 | 0.898 | 0.934 | 4.226706e-09 | 20 |
| 2.374761e-13 | SERF2<br>B LY9   | -0.3127719 | 0.286 | 0.448 | 4.233961e-09 | 20 |
| 2.515269e-13 | PGAM1<br>B LY9   | -0.3148659 | 0.055 | 0.164 | 4.484473e-09 | 20 |
| 2.589215e-13 | HM13<br>B LY9    | -0.4243077 | 0.171 | 0.321 | 4.616311e-09 | 20 |

|              |                |                |            |       |       |              |    |
|--------------|----------------|----------------|------------|-------|-------|--------------|----|
| 2.655601e-13 | SEC11C<br>AIM2 | B LY9<br>B LY9 | -0.3188642 | 0.047 | 0.142 | 4.734672e-09 | 20 |
| 2.765168e-13 | CCT3           | B LY9          | -0.3123973 | 0.33  | 0.492 | 4.930017e-09 | 20 |
| 3.272608e-13 | RPIA           | B LY9          | -0.304903  | 0.096 | 0.225 | 5.834733e-09 | 20 |
| 3.410981e-13 | SEPT7          | B LY9          | 0.4025973  | 0.823 | 0.817 | 6.081437e-09 | 20 |
| 3.707936e-13 | SNRPB2         | B LY9          | -0.3145317 | 0.364 | 0.535 | 6.610879e-09 | 20 |
| 4.146692e-13 | DAZAP1         | B LY9          | -0.3031515 | 0.095 | 0.227 | 7.393137e-09 | 20 |
| 4.6995e-13   | BANK1          | B LY9          | 0.3488024  | 0.596 | 0.511 | 8.378738e-09 | 20 |
| 4.700677e-13 | JUNB           | B LY9          | 0.3922215  | 0.531 | 0.454 | 8.380837e-09 | 20 |
| 4.880669e-13 | ABRACL         | B LY9          | -0.3590906 | 0.19  | 0.349 | 8.701745e-09 | 20 |
| 5.425262e-13 | ANP32A         | B LY9          | -0.305249  | 0.261 | 0.43  | 9.672699e-09 | 20 |
| 5.790198e-13 | C4orf3         | B LY9          | -0.361758  | 0.329 | 0.495 | 1.032334e-08 | 20 |
| 5.851239e-13 | DDIT3          | B LY9          | 0.4616224  | 0.239 | 0.169 | 1.043217e-08 | 20 |
| 6.229421e-13 | PPIB           | B LY9          | -0.4121465 | 0.256 | 0.41  | 1.110643e-08 | 20 |
| 7.18046e-13  | MX1            | B LY9          | 0.4204217  | 0.156 | 0.098 | 1.280204e-08 | 20 |
| 7.712552e-13 | BCL7A          | B LY9          | -0.463394  | 0.164 | 0.305 | 1.375071e-08 | 20 |
| 8.019593e-13 | HVCN1          | B LY9          | 0.4430858  | 0.419 | 0.336 | 1.429813e-08 | 20 |
| 8.128927e-13 | LCK            | B LY9          | -0.3308091 | 0.069 | 0.182 | 1.449306e-08 | 20 |
| 1.004817e-12 | FCMR           | B LY9          | 0.4123889  | 0.343 | 0.251 | 1.791488e-08 | 20 |
| 1.037801e-12 | CHPT1          | B LY9          | 0.4261975  | 0.279 | 0.195 | 1.850296e-08 | 20 |
| 1.178324e-12 | TNFRSF18       | B LY9          | -0.4291563 | 0.085 | 0.173 | 2.100834e-08 | 20 |
| 1.351478e-12 | NOLC1          | B LY9          | -0.3029868 | 0.057 | 0.158 | 2.40955e-08  | 20 |
| 1.494044e-12 | HEXB           | B LY9          | 0.3855923  | 0.17  | 0.108 | 2.663731e-08 | 20 |
| 1.665573e-12 | SRGN           | B LY9          | -0.3640287 | 0.132 | 0.258 | 2.96955e-08  | 20 |
| 1.67025e-12  | RGS10          | B LY9          | -0.3069093 | 0.118 | 0.255 | 2.977889e-08 | 20 |
| 2.148686e-12 |                |                | 0.3968611  | 0.204 | 0.136 | 3.830892e-08 | 20 |



|              |            |       |       |              |              |    |
|--------------|------------|-------|-------|--------------|--------------|----|
| SMIM29       | B LY9      |       |       |              |              |    |
| 3.123125e-12 | -0.31064   | 0.167 | 0.309 | 5.568219e-08 | 20           |    |
| FERMT3       | B LY9      |       |       |              |              |    |
| 3.534329e-12 | -0.3322029 |       | 0.102 | 0.229        | 6.301355e-08 | 20 |
| UBE2G1       | B LY9      |       |       |              |              |    |
| 3.640598e-12 | 0.3183206  |       | 0.103 | 0.049        | 6.490821e-08 | 20 |
| PARP15       | B LY9      |       |       |              |              |    |
| 3.72724e-12  | -0.3572475 |       | 0.149 | 0.283        | 6.645296e-08 | 20 |
| JPT1         | B LY9      |       |       |              |              |    |
| 3.740732e-12 | -0.331399  |       | 0.305 | 0.461        | 6.669351e-08 | 20 |
| RAP1B        | B LY9      |       |       |              |              |    |
| 5.164695e-12 | 0.4085028  |       | 0.551 | 0.491        | 9.208135e-08 | 20 |
| ANKRD12      | B LY9      |       |       |              |              |    |
| 5.861536e-12 | 0.4267088  |       | 0.212 | 0.151        | 1.045053e-07 | 20 |
| CD72         | B LY9      |       |       |              |              |    |
| 6.572987e-12 | -0.3386509 |       | 0.245 | 0.4          | 1.171898e-07 | 20 |
| NUCKS1       | B LY9      |       |       |              |              |    |
| 6.665461e-12 | -0.3493912 |       | 0.089 | 0.213        | 1.188385e-07 | 20 |
| ADA          | B LY9      |       |       |              |              |    |
| 7.75795e-12  | 0.4217218  |       | 0.139 | 0.093        | 1.383165e-07 | 20 |
| HSD17B4      | B LY9      |       |       |              |              |    |
| 8.323985e-12 | 0.4450412  |       | 0.326 | 0.263        | 1.484083e-07 | 20 |
| CD22         | B LY9      |       |       |              |              |    |
| 1.021786e-11 | -0.3001637 |       | 0.186 | 0.341        | 1.821742e-07 | 20 |
| EIF1AX       | B LY9      |       |       |              |              |    |
| 1.171222e-11 | -0.3066638 |       | 0.059 | 0.17         | 2.088172e-07 | 20 |
| SEL1L3       | B LY9      |       |       |              |              |    |
| 2.501762e-11 | -0.3471077 |       | 0.188 | 0.331        | 4.460391e-07 | 20 |
| HNRNPH1      | B LY9      |       |       |              |              |    |
| 3.349898e-11 | -0.3612763 |       | 0.071 | 0.165        | 5.972533e-07 | 20 |
| MARCKS       | B LY9      |       |       |              |              |    |
| 3.64726e-11  | -0.5017113 |       | 0.154 | 0.279        | 6.5027e-07   | 20 |
| HSPA5        | B LY9      |       |       |              |              |    |
| 3.737508e-11 | -0.5943231 |       | 0.61  | 0.697        | 6.663604e-07 | 20 |
| H2AFZ        | B LY9      |       |       |              |              |    |
| 3.993832e-11 | -0.3137137 |       | 0.157 | 0.295        | 7.120603e-07 | 20 |
| HSPA4        | B LY9      |       |       |              |              |    |
| 4.322708e-11 | 0.4465301  |       | 0.305 | 0.25         | 7.706957e-07 | 20 |
| SDCBP        | B LY9      |       |       |              |              |    |
| 4.392914e-11 | -0.3102943 |       | 0.091 | 0.211        | 7.832126e-07 | 20 |
| CFLAR        | B LY9      |       |       |              |              |    |
| 5.48066e-11  | -0.3092487 |       | 0.211 | 0.363        | 9.771468e-07 | 20 |
| TPD52        | B LY9      |       |       |              |              |    |
| 5.838933e-11 | -0.3179761 |       | 0.176 | 0.31         | 1.041023e-06 | 20 |
| CALR         | B LY9      |       |       |              |              |    |
| 6.56372e-11  | -0.4922469 |       | 0.347 | 0.474        | 1.170246e-06 | 20 |
| CD83         | B LY9      |       |       |              |              |    |
| 7.993707e-11 | 0.3841551  |       | 0.373 | 0.302        | 1.425198e-06 | 20 |
| ZFP36L2      | B LY9      |       |       |              |              |    |
| 1.047077e-10 | -0.3184538 |       | 0.348 | 0.492        | 1.866834e-06 | 20 |

|              |                |            |       |       |              |    |
|--------------|----------------|------------|-------|-------|--------------|----|
| 1.211782e-10 | CBX3 B LY9     | 0.3157427  | 0.106 | 0.061 | 2.160487e-06 | 20 |
| 1.329627e-10 | ST3GAL5 B LY9  | -0.3741511 | 0.737 | 0.815 | 2.370591e-06 | 20 |
| 1.964688e-10 | COR01A B LY9   | -0.5235057 | 0.806 | 0.849 | 3.502843e-06 | 20 |
| 2.124178e-10 | HSP90AB1 B LY9 | -0.3653442 | 0.171 | 0.291 | 3.787196e-06 | 20 |
| 4.394204e-10 | BCAS4 B LY9    | -0.3219101 | 0.068 | 0.162 | 7.834427e-06 | 20 |
| 4.501253e-10 | C12orf75 B LY9 | -0.3182187 | 0.092 | 0.195 | 8.025285e-06 | 20 |
| 4.704324e-10 | DNMT1 B LY9    | -0.3044084 | 0.061 | 0.155 | 8.387338e-06 | 20 |
| 4.900086e-10 | CD81 B LY9     | 0.4415404  | 0.208 | 0.136 | 8.736364e-06 | 20 |
| 5.251875e-10 | FCER2 B LY9    | 0.4291124  | 0.197 | 0.157 | 9.363568e-06 | 20 |
| 6.923176e-10 | MGAT1 B LY9    | -1.282526  | 0.123 | 0.218 | 1.234333e-05 | 20 |
| 1.286164e-09 | IGHG1 B LY9    | -0.3913751 | 0.088 | 0.16  | 2.293101e-05 | 20 |
| 1.456447e-09 | LMNA B LY9     | -0.5036778 | 0.062 | 0.132 | 2.596699e-05 | 20 |
| 1.957598e-09 | MYC B LY9      | -0.3098835 | 0.082 | 0.187 | 3.490202e-05 | 20 |
| 2.589011e-09 | P2RX5 B LY9    | 0.3618236  | 0.49  | 0.455 | 4.615947e-05 | 20 |
| 2.735401e-09 | CTSS B LY9     | 0.303948   | 0.154 | 0.097 | 4.876947e-05 | 20 |
| 3.956237e-09 | CREBRF B LY9   | 0.3669345  | 0.289 | 0.231 | 7.053575e-05 | 20 |
| 4.133771e-09 | HSD17B11 B LY9 | -0.3006706 | 0.238 | 0.377 | 7.3701e-05   | 20 |
| 4.159633e-09 | ACADM B LY9    | -0.3080586 | 0.048 | 0.122 | 7.416209e-05 | 20 |
| 4.927944e-09 | LPP B LY9      | -0.3663354 | 0.235 | 0.361 | 8.786032e-05 | 20 |
| 5.740723e-09 | H2AFV B LY9    | -1.653014  | 0.327 | 0.431 | 0.0001023514 | 20 |
| 5.800442e-09 | IGLC3 B LY9    | 0.3550848  | 0.163 | 0.115 | 0.0001034161 | 20 |
| 5.90976e-09  | SIAH1 B LY9    | -0.3465504 | 0.081 | 0.177 | 0.0001053651 | 20 |
| 9.882401e-09 | PDIA4 B LY9    | 0.3163111  | 0.118 | 0.072 | 0.0001761933 | 20 |
| 3.422054e-08 | SOCS3 B LY9    | -0.9241636 | 0.084 | 0.149 | 0.0006101179 | 20 |
| 3.94089e-08  | IGHA1 B LY9    | 0.3251977  | 0.214 | 0.162 | 0.0007026212 | 20 |

|              |                  |               |       |            |              |    |
|--------------|------------------|---------------|-------|------------|--------------|----|
| 5.408795e-08 | TNFRSF14 B LY9   | -0.3212714    | 0.218 | 0.337      | 0.0009643341 | 20 |
|              | DUT B LY9        |               |       |            |              |    |
| 5.839931e-08 | TPP1 B LY9       | 0.3373948     | 0.201 | 0.158      | 0.001041201  | 20 |
| 6.815165e-08 | NPM1 B LY9       | -0.3445187    | 0.922 | 0.93       | 0.001215076  | 20 |
| 7.718389e-08 | JUN B LY9        | -0.4161308    | 0.17  | 0.27       | 0.001376112  | 20 |
| 1.01813e-07  | IFI16 B LY9      | 0.3031592     | 0.637 | 0.62       | 0.001815224  | 20 |
| 1.225704e-07 | LYL1 B LY9       | 0.3403461     | 0.214 | 0.179      | 0.002185307  | 20 |
| 1.362363e-07 | TTC3 B LY9       | 0.3446048     | 0.299 | 0.263      | 0.002428958  | 20 |
| 2.189363e-07 | LAPTM4A B LY9    | 0.3183557     | 0.414 | 0.383      | 0.003903415  | 20 |
| 2.40778e-07  | BNIP3L B LY9     | 0.3083547     | 0.211 | 0.167      | 0.004292831  | 20 |
| 2.943786e-07 | IL4R B LY9       | -0.3283392    | 0.137 | 0.234      | 0.005248477  | 20 |
| 2.988087e-07 | SSR4 B LY9       | -0.4083593    | 0.378 | 0.501      | 0.005327461  | 20 |
| 3.368404e-07 | IGHG3 B LY9      | -2.802518     | 0.341 | 0.452      | 0.006005527  | 20 |
| 4.152691e-07 | CD69 B LY9       | -0.4660048    | 0.218 | 0.317      | 0.007403833  | 20 |
| 4.30555e-07  | PHACTR1 B LY9    | 0.3645097     | 0.276 | 0.241      | 0.007676364  | 20 |
| 7.426243e-07 | WSB1 B LY9       | 0.3583825     | 0.29  | 0.265      | 0.01324025   | 20 |
| 8.545042e-07 | SESN3 B LY9      | 0.3115557     | 0.149 | 0.111      | 0.01523496   | 20 |
| 1.346257e-06 | AL139020.1 B LY9 | -0.3198437    | 0.061 | 0.123      | 0.02400241   | 20 |
| 1.589319e-06 | IGHG2 B LY9      | -2.243860.047 | 0.127 | 0.02833597 |              | 20 |
| 1.730315e-06 | MPG B LY9        | 0.3734457     | 0.348 | 0.331      | 0.03084978   | 20 |
| 2.58577e-06  | TGIF1 B LY9      | 0.3048583     | 0.2   | 0.157      | 0.0461017    | 20 |
| 3.302413e-06 | DNPH1 B LY9      | 0.3291938     | 0.279 | 0.251      | 0.05887872   | 20 |
| 5.379554e-06 | PLP2 B LY9       | 0.3222608     | 0.466 | 0.426      | 0.09591206   | 20 |
| 5.718143e-06 | MARCKSL1 B LY9   | -0.3622478    | 0.501 | 0.59       | 0.1019488    | 20 |
| 6.946379e-06 | ARID5B B LY9     | 0.3049724     | 0.397 | 0.359      | 0.123847     | 20 |
| 8.371041e-06 |                  | -0.4477923    | 0.228 | 0.314      | 0.1492473    | 20 |

|               |            |       |       |               |               |        |        |       |    |
|---------------|------------|-------|-------|---------------|---------------|--------|--------|-------|----|
| HSP90B1       | B LY9      |       |       |               |               |        |        |       |    |
| 9.193343e-06  | -1.823572  |       | 0.149 | 0.245         | 0.1639081     |        |        |       | 20 |
| IGHG4         | B LY9      |       |       |               |               |        |        |       |    |
| 9.880237e-06  | 0.3031873  |       | 0.31  | 0.278         | 0.1761547     |        |        |       | 20 |
| ADAM28        | B LY9      |       |       |               |               |        |        |       |    |
| 1.499347e-05  | -2.024671  |       | 0.54  | 0.646         | 0.2673186     |        |        |       | 20 |
| IGLC2         | B LY9      |       |       |               |               |        |        |       |    |
| 5.407275e-05  | -0.6805466 |       | 0.127 | 0.213         | 0.9640631     |        |        |       | 20 |
| PLCG2         | B LY9      |       |       |               |               |        |        |       |    |
| 9.829104e-05  | 0.302645   | 0.222 | 0.202 | 1             | 20            | BIN1   |        |       | B  |
| LY9           |            |       |       |               |               |        |        |       |    |
| 0.0001235058  | -1.130021  |       | 0.356 | 0.423         | 1             | 20     |        |       |    |
| HIST1H4C      | B LY9      |       |       |               |               |        |        |       |    |
| 0.0008464105  | 0.3049321  |       | 0.174 | 0.169         | 1             | 20     |        |       |    |
| CREM          | B LY9      |       |       |               |               |        |        |       |    |
| 0.001094031   | -0.5499794 |       | 0.687 | 0.716         | 1             | 20     |        |       |    |
| HMG2          | B LY9      |       |       |               |               |        |        |       |    |
| 0.004546433   | 0.3435775  |       | 0.13  | 0.125         | 1             | 20     |        |       |    |
| LGALS3        | B LY9      |       |       |               |               |        |        |       |    |
| 0             | 5.20417    | 0.931 | 0.202 | 0             | 21            | PLCG2  | B      | PLCG2 |    |
| 0             | -1.058405  |       | 0.572 | 0.987         | 0             | 21     | MT-C03 |       | B  |
| PLCG2         |            |       |       |               |               |        |        |       |    |
| 0             | -1.279438  |       | 0.499 | 0.985         | 0             | 21     | MT-C02 |       | B  |
| PLCG2         |            |       |       |               |               |        |        |       |    |
| 0             | -1.42721   | 0.53  | 0.986 | 0             | 21            | MT-C01 | B      | PLCG2 |    |
| 6.860818e-318 | -1.156266  |       | 0.458 | 0.975         | 1.223215e-313 |        |        |       | 21 |
| MT-ND3        | B PLCG2    |       |       |               |               |        |        |       |    |
| 2.578808e-314 | -1.322005  |       | 0.444 | 0.966         | 4.597756e-310 |        |        |       | 21 |
| MT-CYB        | B PLCG2    |       |       |               |               |        |        |       |    |
| 9.186407e-307 | -1.428282  |       | 0.439 | 0.967         | 1.637844e-302 |        |        |       | 21 |
| MT-ND2        | B PLCG2    |       |       |               |               |        |        |       |    |
| 5.54311e-289  | -1.283963  |       | 0.636 | 0.991         | 9.882811e-285 |        |        |       | 21 |
| HLA-B         | B PLCG2    |       |       |               |               |        |        |       |    |
| 2.381678e-279 | -1.069669  |       | 0.549 | 0.979         | 4.246294e-275 |        |        |       | 21 |
| MT-ND4        | B PLCG2    |       |       |               |               |        |        |       |    |
| 1.196793e-254 | 2.438168   | 0.377 | 0.027 | 2.133763e-250 |               | 21     |        |       |    |
| AC007952.4    | B PLCG2    |       |       |               |               |        |        |       |    |
| 8.134362e-229 | 2.482734   | 0.244 | 0.002 | 1.450275e-224 |               | 21     |        |       |    |
| HIST1H3B      | B PLCG2    |       |       |               |               |        |        |       |    |
| 8.194732e-223 | 2.370197   | 0.42  | 0.082 | 1.461039e-218 |               | 21     |        |       |    |
| ZNF277        | B PLCG2    |       |       |               |               |        |        |       |    |
| 3.887656e-213 | 1.737873   | 0.23  | 0.002 | 6.931302e-209 |               | 21     |        |       |    |
| HIST1H4B      | B PLCG2    |       |       |               |               |        |        |       |    |
| 4.624778e-211 | -0.9080054 |       | 0.458 | 0.94          | 8.245516e-207 |        |        |       | 21 |
| MT-ATP6       | B PLCG2    |       |       |               |               |        |        |       |    |
| 4.936642e-211 | -1.046345  |       | 0.917 | 0.999         | 8.801539e-207 |        |        |       | 21 |
| B2M           | B PLCG2    |       |       |               |               |        |        |       |    |
| 2.250128e-208 | -1.342896  |       | 0.549 | 0.968         | 4.011754e-204 |        |        |       | 21 |
| FTL           | B PLCG2    |       |       |               |               |        |        |       |    |
| 1.265065e-198 | -1.330451  |       | 0.364 | 0.912         | 2.255485e-194 |        |        |       | 21 |

|               |            |       |       |               |               |    |  |
|---------------|------------|-------|-------|---------------|---------------|----|--|
| HLA-A         | B          | PLCG2 |       |               |               |    |  |
| 1.487212e-197 | 2.106003   | 0.228 | 0.005 | 2.651551e-193 | 21            |    |  |
| HIST1H2AG     | B          | PLCG2 |       |               |               |    |  |
| 5.702934e-187 | -1.025944  |       | 0.38  | 0.888         | 1.016776e-182 | 21 |  |
| MT-ND1        | B          | PLCG2 |       |               |               |    |  |
| 9.304405e-176 | 1.774707   | 0.183 | 0.001 | 1.658882e-171 | 21            |    |  |
| HIST1H4D      | B          | PLCG2 |       |               |               |    |  |
| 1.046037e-174 | 1.887693   | 0.219 | 0.009 | 1.864979e-170 | 21            |    |  |
| HIST1H4J      | B          | PLCG2 |       |               |               |    |  |
| 2.9285e-167   | 1.860761   | 0.2   | 0.004 | 5.221223e-163 | 21            |    |  |
| HIST1H3H      | B          | PLCG2 |       |               |               |    |  |
| 7.36107e-164  | 1.586585   | 0.176 | 0.005 | 1.312405e-159 | 21            |    |  |
| HIST1H2AJ     | B          | PLCG2 |       |               |               |    |  |
| 7.502485e-164 | 2.584786   | 0.675 | 0.297 | 1.337618e-159 | 21            |    |  |
| HMGB2         | B          | PLCG2 |       |               |               |    |  |
| 4.973143e-151 | 1.597429   | 0.162 | 0.002 | 8.866617e-147 | 21            |    |  |
| HIST1H2AI     | B          | PLCG2 |       |               |               |    |  |
| 2.347726e-147 | 1.911541   | 0.188 | 0.011 | 4.185762e-143 | 21            |    |  |
| HIST1H1B      | B          | PLCG2 |       |               |               |    |  |
| 8.366831e-146 | 1.065946   | 0.94  | 0.958 | 1.491722e-141 | 21            |    |  |
| PABPC1        | B          | PLCG2 |       |               |               |    |  |
| 1.050186e-143 | 1.398246   | 0.162 | 0.002 | 1.872376e-139 | 21            |    |  |
| HIST2H2BF     | B          | PLCG2 |       |               |               |    |  |
| 1.903584e-143 | -0.8241935 |       | 0.964 | 1             | 3.393901e-139 | 21 |  |
| EEF1A1        | B          | PLCG2 |       |               |               |    |  |
| 6.812852e-143 | -0.8356579 |       | 0.547 | 0.942         | 1.214663e-138 | 21 |  |
| EEF2          | B          | PLCG2 |       |               |               |    |  |
| 1.393639e-139 | 1.857007   | 0.316 | 0.062 | 2.484718e-135 | 21            |    |  |
| TMEM107       | B          | PLCG2 |       |               |               |    |  |
| 2.707948e-137 | 1.482885   | 0.15  | 0.002 | 4.828e-133    | 21            |    |  |
| HIST1H3C      | B          | PLCG2 |       |               |               |    |  |
| 5.708815e-135 | 1.365571   | 0.168 | 0.003 | 1.017825e-130 | 21            |    |  |
| HIST1H3G      | B          | PLCG2 |       |               |               |    |  |
| 1.231468e-133 | 1.341118   | 0.161 | 0.003 | 2.195585e-129 | 21            |    |  |
| HIST1H4E      | B          | PLCG2 |       |               |               |    |  |
| 1.905736e-133 | -0.9066804 |       | 0.689 | 0.98          | 3.397737e-129 | 21 |  |
| FTH1          | B          | PLCG2 |       |               |               |    |  |
| 2.210291e-133 | -0.5895183 |       | 0.755 | 0.987         | 3.940728e-129 | 21 |  |
| RPL29         | B          | PLCG2 |       |               |               |    |  |
| 6.78496e-133  | -0.6268164 |       | 0.841 | 0.995         | 1.209691e-128 | 21 |  |
| RPS5          | B          | PLCG2 |       |               |               |    |  |
| 1.910964e-132 | -1.282219  |       | 0.259 | 0.8           | 3.407058e-128 | 21 |  |
| HLA-E         | B          | PLCG2 |       |               |               |    |  |
| 2.86365e-132  | 1.705718   | 0.187 | 0.012 | 5.105602e-128 | 21            |    |  |
| HIST1H2BJ     | B          | PLCG2 |       |               |               |    |  |
| 2.084199e-128 | 0.7963415  |       | 0.998 | 0.998         | 3.715918e-124 | 21 |  |
| TMSB4X        | B          | PLCG2 |       |               |               |    |  |
| 1.794362e-127 | 1.328953   | 0.145 | 0.001 | 3.199169e-123 | 21            |    |  |
| HIST1H3J      | B          | PLCG2 |       |               |               |    |  |
| 1.140709e-122 | -0.6211919 |       | 0.921 | 0.999         | 2.033771e-118 | 21 |  |

|               |                   |                |       |               |               |    |
|---------------|-------------------|----------------|-------|---------------|---------------|----|
| 2.334731e-122 | RPL3 B PLCG2      | -0.6271057     | 0.941 | 0.999         | 4.162592e-118 | 21 |
| 7.368806e-121 | RPL18A B PLCG2    | 2.026971 0.394 | 0.091 | 1.313784e-116 | 21            |    |
| 1.0198e-120   | PCLAF B PLCG2     | 1.596046 0.15  | 0.002 | 1.818202e-116 | 21            |    |
| 2.552505e-120 | RMRP B PLCG2      | -1.688456      | 0.168 | 0.705         | 4.550861e-116 | 21 |
| 2.443871e-116 | EMP3 B PLCG2      | -0.5280525     | 0.807 | 0.99          | 4.357178e-112 | 21 |
| 8.335226e-116 | RACK1 B PLCG2     | 1.292003 0.13  | 0.001 | 1.486087e-111 | 21            |    |
| 6.914395e-115 | HIST1H4F B PLCG2  | 1.346954 0.152 | 0.005 | 1.232768e-110 | 21            |    |
| 8.870801e-115 | Z93241.1 B PLCG2  | 1.431166 0.145 | 0.006 | 1.581575e-110 | 21            |    |
| 8.336987e-114 | HIST1H2BH B PLCG2 | -0.8460535     | 0.558 | 0.94          | 1.486401e-109 | 21 |
| 1.190382e-111 | BTG1 B PLCG2      | -1.026984      | 0.249 | 0.764         | 2.122332e-107 | 21 |
| 4.23791e-111  | MT-ND5 B PLCG2    | 1.563647 0.166 | 0.015 | 7.555769e-107 | 21            |    |
| 7.854417e-111 | HIST1H2BC B PLCG2 | 1.152092 0.131 | 0.003 | 1.400364e-106 | 21            |    |
| 3.673579e-109 | HIST1H2AH B PLCG2 | 1.080702 0.133 | 0.001 | 6.549624e-105 | 21            |    |
| 5.239281e-109 | HIST1H3A B PLCG2  | 0.9305676      | 0.981 | 0.999         | 9.341114e-105 | 21 |
| 8.88797e-109  | PTMA B PLCG2      | 1.126979 0.116 | 0     | 1.584636e-104 | 21            |    |
| 4.144939e-106 | HIST1H4L B PLCG2  | 1.450089 0.898 | 0.932 | 7.390011e-102 | 21            |    |
| 1.87569e-105  | HMGB1 B PLCG2     | -0.9766501     | 0.288 | 0.758         | 3.344167e-101 | 21 |
| 3.815394e-104 | HLA-C B PLCG2     | 1.718236 0.813 | 0.715 | 6.802466e-100 | 21            |    |
| 1.741894e-103 | HMG2 B PLCG2      | -0.4950568     | 0.839 | 0.994         | 3.105622e-99  | 21 |
| 2.356001e-103 | RPL18 B PLCG2     | -0.8910925     | 0.627 | 0.946         | 4.200514e-99  | 21 |
| 1.386547e-102 | YBX1 B PLCG2      | 1.078007 0.111 | 0.001 | 2.472074e-98  | 21            |    |
| 1.938428e-102 | HIST1H4I B PLCG2  | 0.9490224      | 0.111 | 0             | 3.456023e-98  | 21 |
| 1.0221e-98    | HIST1H4A B PLCG2  | 0.9170919      | 0.112 | 0.001         | 1.822302e-94  | 21 |
| 2.312044e-98  | HIST1H2AL B PLCG2 | -0.4239122     | 0.876 | 0.996         | 4.122143e-94  | 21 |
| 4.931066e-98  | RPS9 B PLCG2      | -0.5863619     | 0.959 | 0.999         | 8.791598e-94  | 21 |

|              |                    |                |       |       |              |    |
|--------------|--------------------|----------------|-------|-------|--------------|----|
| 6.531869e-97 | RPL13 B PLCG2      | 0.9519676      | 0.102 | 0.001 | 1.164567e-92 | 21 |
| 1.305195e-96 | HIST1H3F B PLCG2   | -0.5615267     | 0.791 | 0.984 | 2.327032e-92 | 21 |
| 1.068058e-93 | RPSA B PLCG2       | -0.3949556     | 0.967 | 0.999 | 1.90424e-89  | 21 |
| 9.174316e-93 | RPL10 B PLCG2      | 1.77576 0.358  | 0.106 |       | 1.635689e-88 | 21 |
| 1.625865e-92 | VPREB3 B PLCG2     | -1.181157      | 0.459 | 0.853 | 2.898755e-88 | 21 |
| 3.27846e-92  | HSP90AB1 B PLCG2   | 1.302935 0.874 | 0.851 |       | 5.845167e-88 | 21 |
| 1.778327e-91 | ATP5MG B PLCG2     | -0.6381643     | 0.461 | 0.87  | 3.170579e-87 | 21 |
| 2.845708e-87 | UBC B PLCG2        | -0.4947473     | 0.839 | 0.993 | 5.073612e-83 | 21 |
| 1.101762e-86 | RPL9 B PLCG2       | 1.38267 0.145  | 0.014 |       | 1.964332e-82 | 21 |
| 8.78622e-86  | HIST1H4H B PLCG2   | 1.847739 0.542 | 0.202 |       | 1.566495e-81 | 21 |
| 1.6198e-85   | RGS13 B PLCG2      | 1.356055 0.225 | 0.047 |       | 2.887941e-81 | 21 |
| 4.60637e-84  | LINC01991 B PLCG2  | -0.4440551     | 0.976 | 1     | 8.212697e-80 | 21 |
| 3.089732e-81 | RPLP1 B PLCG2      | -1.237144      | 0.314 | 0.72  | 5.508683e-77 | 21 |
| 1.41288e-80  | EN01 B PLCG2       | -1.215807      | 0.687 | 0.909 | 2.519025e-76 | 21 |
| 2.095445e-80 | IGHM B PLCG2       | -0.9495102     | 0.382 | 0.766 | 3.735969e-76 | 21 |
| 1.900048e-78 | PKM B PLCG2        | 1.363942 0.178 | 0.033 |       | 3.387595e-74 | 21 |
| 2.394219e-77 | HIST1H1E B PLCG2   | 0.9799301      | 0.109 | 0.007 | 4.268653e-73 | 21 |
| 2.822969e-77 | HIST1H2AE B PLCG2  | -0.5513639     | 0.554 | 0.87  | 5.033072e-73 | 21 |
| 4.884715e-77 | CD79A B PLCG2      | -0.6448342     | 0.399 | 0.821 | 8.708959e-73 | 21 |
| 2.337549e-75 | NOP53 B PLCG2      | -1.498645      | 0.159 | 0.575 | 4.167616e-71 | 21 |
| 1.327901e-74 | VIM B PLCG2        | -0.7070465     | 0.313 | 0.719 | 2.367514e-70 | 21 |
| 3.521771e-73 | PSME1 B PLCG2      | 1.138706 0.929 | 0.933 |       | 6.278965e-69 | 21 |
| 5.48371e-71  | SERF2 B PLCG2      | -0.5122617     | 0.58  | 0.899 | 9.776906e-67 | 21 |
| 5.560537e-71 | SLC25A6 B PLCG2    | 1.080958 0.131 | 0.013 |       | 9.913882e-67 | 21 |
| 1.020569e-70 | AL031777.3 B PLCG2 | -1.007217      | 0.173 | 0.582 | 1.819573e-66 | 21 |

|              |                   |                |       |              |              |
|--------------|-------------------|----------------|-------|--------------|--------------|
| 4.174209e-70 | SARAF B PLCG2     | 1.344849 0.235 | 0.071 | 7.442197e-66 | 21           |
| 1.251376e-68 | CDCA7 B PLCG2     | -0.3581083     | 0.755 | 0.967        | 2.231079e-64 |
| 2.469378e-68 | RPL4 B PLCG2      | -0.5987044     | 0.489 | 0.859        | 4.402654e-64 |
| 2.660609e-68 | SH3BGRL3 B PLCG2  | -1.428117      | 0.143 | 0.548        | 4.743601e-64 |
| 6.094565e-68 | CCR7 B PLCG2      | -0.8510551     | 0.216 | 0.626        | 1.0866e-63   |
| 1.159729e-67 | SUB1 B PLCG2      | 1.327364 0.793 | 0.768 | 2.067681e-63 | 21           |
| 1.346996e-67 | HMG1 B PLCG2      | 1.574082 0.378 | 0.205 | 2.401559e-63 | 21           |
| 3.646037e-67 | SNHG25 B PLCG2    | 1.139426 0.884 | 0.94  | 6.500519e-63 | 21           |
| 3.516032e-66 | H3F3A B PLCG2     | -0.3504492     | 0.582 | 0.922        | 6.268734e-62 |
| 4.375679e-65 | PFDN5 B PLCG2     | -0.3560074     | 0.908 | 0.997        | 7.801398e-61 |
| 4.447725e-65 | RPS3 B PLCG2      | 1.709827 0.415 | 0.187 | 7.929849e-61 | 21           |
| 1.91918e-63  | PTTG1 B PLCG2     | 0.8755391      | 0.105 | 0.01         | 3.421706e-59 |
| 3.17386e-63  | HIST2H2BE B PLCG2 | -0.3234675     | 0.63  | 0.932        | 5.658676e-59 |
| 4.230252e-62 | EEF1D B PLCG2     | -0.3271853     | 0.934 | 0.998        | 7.542117e-58 |
| 4.917827e-62 | RPS4X B PLCG2     | -0.7029299     | 0.311 | 0.681        | 8.767995e-58 |
| 5.412959e-62 | TAGLN2 B PLCG2    | -0.3810272     | 0.499 | 0.757        | 9.650764e-58 |
| 6.547736e-62 | HLA-DRB1 B PLCG2  | -0.4000333     | 0.983 | 1            | 1.167396e-57 |
| 8.662891e-61 | RPS2 B PLCG2      | -0.3823928     | 0.934 | 0.998        | 1.544507e-56 |
| 3.189786e-60 | RPL7 B PLCG2      | -0.8716266     | 0.192 | 0.575        | 5.687069e-56 |
| 7.718272e-60 | SNX2 B PLCG2      | -0.7461191     | 0.473 | 0.819        | 1.376091e-55 |
| 5.055313e-59 | HLA-DPA1 B PLCG2  | 0.8089122      | 0.109 | 0.011        | 9.013117e-55 |
| 7.462019e-59 | HIST1H2BG B PLCG2 | -0.6566656     | 0.237 | 0.632        | 1.330403e-54 |
| 3.087598e-57 | ATP6V0E1 B PLCG2  | -0.3689035     | 0.617 | 0.86         | 5.504879e-53 |
| 9.943516e-57 | CD79B B PLCG2     | -0.9794369     | 0.235 | 0.611        | 1.772829e-52 |
| 2.390411e-56 | IGHD B PLCG2      | -0.4018871     | 0.63  | 0.905        | 4.261863e-52 |





|              |            |       |       |              |              |    |  |
|--------------|------------|-------|-------|--------------|--------------|----|--|
| H2AFV        | B          | PLCG2 |       |              |              |    |  |
| 9.050461e-50 | -0.3218338 |       | 0.767 | 0.967        | 1.613607e-45 | 21 |  |
|              | EIF1       | B     | PLCG2 |              |              |    |  |
| 1.771877e-49 | -0.4093991 |       | 0.775 | 0.98         | 3.159079e-45 | 21 |  |
|              | RPS10      | B     | PLCG2 |              |              |    |  |
| 2.348197e-49 | -0.8061191 |       | 0.152 | 0.508        | 4.186601e-45 | 21 |  |
|              | TSC22D3    | B     | PLCG2 |              |              |    |  |
| 4.365234e-49 | -0.6689384 |       | 0.181 | 0.514        | 7.782776e-45 | 21 |  |
|              | TALD01     | B     | PLCG2 |              |              |    |  |
| 4.66902e-49  | -1.016032  |       | 0.081 | 0.387        | 8.324396e-45 | 21 |  |
|              | CD44       | B     | PLCG2 |              |              |    |  |
| 5.792541e-49 | -0.9965712 |       | 0.081 | 0.384        | 1.032752e-44 | 21 |  |
|              | PDCD4      | B     | PLCG2 |              |              |    |  |
| 2.491089e-48 | -0.4304814 |       | 0.351 | 0.691        | 4.441362e-44 | 21 |  |
|              | PPP1CA     | B     | PLCG2 |              |              |    |  |
| 2.886095e-48 | -0.7168533 |       | 0.247 | 0.615        | 5.145619e-44 | 21 |  |
|              | SYNGR2     | B     | PLCG2 |              |              |    |  |
| 6.896129e-48 | -0.8568292 |       | 0.136 | 0.448        | 1.229511e-43 | 21 |  |
|              | ANXA2      | B     | PLCG2 |              |              |    |  |
| 1.176522e-47 | -0.3139394 |       | 0.484 | 0.829        | 2.097622e-43 | 21 |  |
|              | EIF3E      | B     | PLCG2 |              |              |    |  |
| 1.927731e-47 | -0.7913821 |       | 0.199 | 0.537        | 3.436951e-43 | 21 |  |
|              | IMPDH2     | B     | PLCG2 |              |              |    |  |
| 2.196827e-47 | -0.610711  |       | 0.193 | 0.536        | 3.916724e-43 | 21 |  |
|              | GHITM      | B     | PLCG2 |              |              |    |  |
| 2.357998e-47 | 1.009817   | 0.147 | 0.044 | 4.204075e-43 | 21           |    |  |
| MYBL1        | B          | PLCG2 |       |              |              |    |  |
| 2.473012e-46 | 1.331907   | 0.2   | 0.084 | 4.409132e-42 | 21           |    |  |
| HIST1H1C     | B          | PLCG2 |       |              |              |    |  |
| 2.312308e-45 | -0.3994767 |       | 0.953 | 0.998        | 4.122614e-41 | 21 |  |
|              | RPL11      | B     | PLCG2 |              |              |    |  |
| 7.021201e-45 | -0.5364957 |       | 0.188 | 0.514        | 1.25181e-40  | 21 |  |
|              | PSMD8      | B     | PLCG2 |              |              |    |  |
| 1.007284e-44 | -0.4295119 |       | 0.952 | 0.997        | 1.795887e-40 | 21 |  |
|              | RPS12      | B     | PLCG2 |              |              |    |  |
| 1.31812e-44  | -0.5479341 |       | 0.192 | 0.528        | 2.350076e-40 | 21 |  |
|              | SF3B2      | B     | PLCG2 |              |              |    |  |
| 1.614966e-44 | -0.3144237 |       | 0.86  | 0.987        | 2.879324e-40 | 21 |  |
|              | TMSB10     | B     | PLCG2 |              |              |    |  |
| 2.62026e-44  | -1.364017  |       | 0.143 | 0.469        | 4.671661e-40 | 21 |  |
|              | S100A6     | B     | PLCG2 |              |              |    |  |
| 3.989279e-44 | -0.7505276 |       | 0.23  | 0.563        | 7.112485e-40 | 21 |  |
|              | NCL        | B     | PLCG2 |              |              |    |  |
| 1.071126e-43 | -0.5499967 |       | 0.316 | 0.657        | 1.90971e-39  | 21 |  |
|              | HLA-DQA1   | B     | PLCG2 |              |              |    |  |
| 1.472082e-43 | -0.6677573 |       | 0.145 | 0.467        | 2.624574e-39 | 21 |  |
|              | PRMT1      | B     | PLCG2 |              |              |    |  |
| 2.411884e-43 | -0.3025985 |       | 0.402 | 0.738        | 4.300148e-39 | 21 |  |
|              | SKP1       | B     | PLCG2 |              |              |    |  |
| 3.211523e-43 | -0.6920592 |       | 0.126 | 0.423        | 5.725825e-39 | 21 |  |

|              |          |         |                |       |              |              |    |
|--------------|----------|---------|----------------|-------|--------------|--------------|----|
| 6.379026e-43 | EIF6     | B PLCG2 | -0.3325684     | 0.344 | 0.629        | 1.137317e-38 | 21 |
| 9.690873e-43 | HLA-DMB  | B PLCG2 | 1.621495 0.53  | 0.421 | 1.727786e-38 | 21           |    |
| 1.933065e-42 | HIST1H4C | B PLCG2 | -0.6325165     | 0.104 | 0.395        | 3.446461e-38 | 21 |
| 9.900944e-42 | MAF1     | B PLCG2 | -0.3601274     | 0.66  | 0.92         | 1.765239e-37 | 21 |
| 1.129737e-41 | EEF1B2   | B PLCG2 | -0.9749624     | 0.059 | 0.33         | 2.014208e-37 | 21 |
| 1.904641e-41 | SLC3A2   | B PLCG2 | -0.615103      | 0.18  | 0.505        | 3.395784e-37 | 21 |
| 2.741501e-41 | FOXP1    | B PLCG2 | -0.5393911     | 0.247 | 0.576        | 4.887823e-37 | 21 |
| 3.467768e-41 | EIF3D    | B PLCG2 | 1.070198 0.181 | 0.082 | 6.182684e-37 | 21           |    |
| 6.729869e-41 | H2AFX    | B PLCG2 | 0.9607887      | 0.192 | 0.07         | 1.199868e-36 | 21 |
| 1.613978e-40 | DHFR     | B PLCG2 | -0.5408554     | 0.297 | 0.653        | 2.877562e-36 | 21 |
| 1.777948e-40 | ZFP36L1  | B PLCG2 | -0.5388843     | 0.478 | 0.779        | 3.169903e-36 | 21 |
| 2.113641e-40 | HLA-DPB1 | B PLCG2 | -0.6810407     | 0.105 | 0.39         | 3.768411e-36 | 21 |
| 2.190042e-40 | PSAP     | B PLCG2 | -0.618687      | 0.221 | 0.549        | 3.904625e-36 | 21 |
| 2.410656e-40 | CNBP     | B PLCG2 | -0.6046042     | 0.059 | 0.288        | 4.297958e-36 | 21 |
| 3.688568e-40 | UQCRC1   | B PLCG2 | -0.5987239     | 0.097 | 0.366        | 6.576347e-36 | 21 |
| 5.361948e-40 | CPNE1    | B PLCG2 | -0.6618306     | 0.185 | 0.496        | 9.559817e-36 | 21 |
| 5.767832e-40 | CYTIP    | B PLCG2 | 1.296729 0.547 | 0.452 | 1.028347e-35 | 21           |    |
| 6.274026e-40 | PTPRC    | B PLCG2 | 1.041496 0.185 | 0.076 | 1.118596e-35 | 21           |    |
| 1.24014e-39  | KLHL6    | B PLCG2 | -0.5535746     | 0.104 | 0.338        | 2.211046e-35 | 21 |
| 1.425999e-39 | ANXA11   | B PLCG2 | 1.312011 0.694 | 0.696 | 2.542414e-35 | 21           |    |
| 1.586066e-39 | H2AFZ    | B PLCG2 | -0.7485663     | 0.152 | 0.452        | 2.827798e-35 | 21 |
| 1.593928e-39 | PNRC1    | B PLCG2 | -0.5456303     | 0.15  | 0.455        | 2.841814e-35 | 21 |
| 1.801223e-39 | VCP      | B PLCG2 | -0.3197572     | 0.332 | 0.657        | 3.2114e-35   | 21 |
| 1.836685e-39 | ATP5F1A  | B PLCG2 | -0.3087852     | 0.404 | 0.724        | 3.274625e-35 | 21 |
| 2.716885e-39 | EIF3F    | B PLCG2 | -0.7658476     | 0.092 | 0.365        | 4.843934e-35 | 21 |

|              |               |                          |       |              |              |    |
|--------------|---------------|--------------------------|-------|--------------|--------------|----|
| 4.900699e-39 | ANXA6<br>LSP1 | B PLCG2<br>B PLCG2       | 0.25  | 0.519        | 8.737456e-35 | 21 |
| 6.732493e-39 | APOBEC3G      | B PLCG2                  | 0.081 | 0.354        | 1.200336e-34 | 21 |
| 8.450346e-39 | SELL          | B PLCG2                  | 0.135 | 0.375        | 1.506612e-34 | 21 |
| 1.043686e-38 | ARID5B        | B PLCG2                  | 0.088 | 0.363        | 1.860787e-34 | 21 |
| 1.39325e-38  | HSPA8         | B PLCG2                  | 0.437 | 0.74         | 2.484025e-34 | 21 |
| 1.653313e-38 | ARF6          | B PLCG2                  | 0.259 | 0.607        | 2.947692e-34 | 21 |
| 3.099789e-38 | CCT7          | B PLCG2                  | 0.155 | 0.448        | 5.526613e-34 | 21 |
| 3.554626e-38 | PLP2          | B PLCG2                  | 0.124 | 0.43         | 6.337542e-34 | 21 |
| 4.920273e-38 | RPL13A        | B PLCG2                  | 0.988 | 1            | 8.772354e-34 | 21 |
| 5.247693e-38 | SHMT2         | B PLCG2                  | 0.117 | 0.391        | 9.356111e-34 | 21 |
| 8.186939e-38 | GADD45GIP1    | B PLCG2                  | 0.155 | 0.464        | 1.459649e-33 | 21 |
| 8.769574e-38 | ATP5F1B       | B PLCG2                  | 0.328 | 0.632        | 1.563527e-33 | 21 |
| 1.652584e-37 | SSR4          | B PLCG2                  | 0.192 | 0.503        | 2.946393e-33 | 21 |
| 2.304531e-37 | TRBC2         | B PLCG2                  | 0.078 | 0.332        | 4.108748e-33 | 21 |
| 2.428879e-37 | RAB5C         | B PLCG2                  | 0.079 | 0.328        | 4.330448e-33 | 21 |
| 2.9165e-37   | LITAF         | B PLCG2                  | 0.09  | 0.351        | 5.199829e-33 | 21 |
| 3.446266e-37 | ERG28         | B PLCG2                  | 0.057 | 0.289        | 6.144347e-33 | 21 |
| 4.215326e-37 | HLA-DRA       | B PLCG2                  | 0.794 | 0.948        | 7.515504e-33 | 21 |
| 4.961885e-37 | LY6E          | B PLCG2                  | 0.1   | 0.354        | 8.846544e-33 | 21 |
| 6.50538e-37  | S100A11       | B PLCG2                  | 0.086 | 0.339        | 1.159844e-32 | 21 |
| 8.011449e-37 | AC023590.1    | 1.13707 0.242<br>B PLCG2 | 0.11  | 1.428361e-32 | 21           |    |
| 1.085107e-36 | GTF3A         | B PLCG2                  | 0.19  | 0.488        | 1.934638e-32 | 21 |
| 1.541471e-36 | ITM2B         | B PLCG2                  | 0.169 | 0.471        | 2.748289e-32 | 21 |
| 2.455612e-36 | PSMC5         | B PLCG2                  | 0.123 | 0.405        | 4.37811e-32  | 21 |
| 2.609735e-36 |               | B PLCG2                  | 0.085 | 0.356        | 4.652896e-32 | 21 |

|              |           |         |            |       |       |              |    |
|--------------|-----------|---------|------------|-------|-------|--------------|----|
| 2.755774e-36 | TXNIP     | B PLCG2 | -0.633324  | 0.226 | 0.533 | 4.913269e-32 | 21 |
| 3.015406e-36 | PSME2     | B PLCG2 | -0.3712469 | 0.275 | 0.605 | 5.376168e-32 | 21 |
| 3.67461e-36  | UBXN1     | B PLCG2 | 0.8708064  | 0.105 | 0.034 | 6.551463e-32 | 21 |
| 3.908594e-36 | SLC20A1   | B PLCG2 | -0.5764604 | 0.138 | 0.422 | 6.968633e-32 | 21 |
| 4.059676e-36 | NUDC      | B PLCG2 | -0.3765164 | 0.389 | 0.707 | 7.237996e-32 | 21 |
| 4.77334e-36  | TPI1      | B PLCG2 | -0.5913165 | 0.095 | 0.353 | 8.510387e-32 | 21 |
| 6.986287e-36 | FKBP8     | B PLCG2 | -0.5480202 | 0.09  | 0.347 | 1.245585e-31 | 21 |
| 7.827218e-36 | PSMC4     | B PLCG2 | -0.5621046 | 0.107 | 0.363 | 1.395515e-31 | 21 |
| 1.173769e-35 | BSG       | B PLCG2 | -0.6511339 | 0.086 | 0.348 | 2.092712e-31 | 21 |
| 1.187818e-35 | RNH1      | B PLCG2 | -0.8275773 | 0.054 | 0.251 | 2.117761e-31 | 21 |
| 1.432282e-35 | TNFRSF13B | B PLCG2 | -0.61522   | 0.19  | 0.496 | 2.553615e-31 | 21 |
| 3.848397e-35 | ANKRD12   | B PLCG2 | 0.7236972  | 0.126 | 0.04  | 6.861306e-31 | 21 |
| 5.485814e-35 | MND1      | B PLCG2 | -0.7302817 | 0.064 | 0.282 | 9.780657e-31 | 21 |
| 6.593011e-35 | RNASSET2  | B PLCG2 | -0.3387651 | 0.273 | 0.583 | 1.175468e-30 | 21 |
| 9.714692e-35 | COPE      | B PLCG2 | -0.6922762 | 0.09  | 0.359 | 1.732032e-30 | 21 |
| 1.050308e-34 | SARS      | B PLCG2 | 0.7935537  | 0.836 | 0.785 | 1.872593e-30 | 21 |
| 1.369281e-34 | ACTG1     | B PLCG2 | -0.5012522 | 0.204 | 0.507 | 2.44129e-30  | 21 |
| 1.390601e-34 | XRCC5     | B PLCG2 | -0.3143323 | 0.477 | 0.763 | 2.479303e-30 | 21 |
| 1.438406e-34 | PSMA7     | B PLCG2 | -0.5780618 | 0.081 | 0.327 | 2.564535e-30 | 21 |
| 2.321297e-34 | PUF60     | B PLCG2 | -0.6854062 | 0.152 | 0.449 | 4.138641e-30 | 21 |
| 2.419143e-34 | KLF6      | B PLCG2 | -0.6667887 | 0.136 | 0.417 | 4.313091e-30 | 21 |
| 2.649208e-34 | NPC2      | B PLCG2 | -0.4144368 | 0.235 | 0.554 | 4.723273e-30 | 21 |
| 3.351881e-34 | PSMA1     | B PLCG2 | -0.646634  | 0.095 | 0.339 | 5.976068e-30 | 21 |
| 6.33138e-34  | ACAT2     | B PLCG2 | -0.8303267 | 0.079 | 0.349 | 1.128822e-29 | 21 |
| 6.755642e-34 | CAST      | B PLCG2 | -0.3267883 | 0.302 | 0.606 | 1.204463e-29 | 21 |

|              |                      |                |       |              |              |     |
|--------------|----------------------|----------------|-------|--------------|--------------|-----|
| 8.484633e-34 | TRIR<br>B PLCG2      | -0.6331607     | 0.1   | 0.365        | 1.512725e-29 | 21  |
| 1.254115e-33 | HSPA9<br>B PLCG2     | 1.228897 0.674 | 0.486 | 2.235962e-29 | 21           | LTB |
| 1.608198e-33 | SSR2<br>B PLCG2      | -0.3916729     | 0.199 | 0.481        | 2.867256e-29 | 21  |
| 1.631105e-33 | KLF2<br>B PLCG2      | -0.8535931     | 0.078 | 0.276        | 2.908097e-29 | 21  |
| 2.571363e-33 | PHB<br>B PLCG2       | -0.5768767     | 0.126 | 0.396        | 4.584482e-29 | 21  |
| 2.999926e-33 | PSMD13<br>B PLCG2    | -0.4980503     | 0.105 | 0.356        | 5.348568e-29 | 21  |
| 3.835501e-33 | S100A4<br>B PLCG2    | -1.208998      | 0.074 | 0.266        | 6.838314e-29 | 21  |
| 5.48188e-33  | SQLI<br>B PLCG2      | -0.6574033     | 0.1   | 0.359        | 9.773643e-29 | 21  |
| 6.428867e-33 | ISCU<br>B PLCG2      | -0.5283325     | 0.183 | 0.484        | 1.146203e-28 | 21  |
| 7.975072e-33 | TUFM<br>B PLCG2      | -0.485035      | 0.2   | 0.501        | 1.421876e-28 | 21  |
| 1.186848e-32 | UFC1<br>B PLCG2      | -0.4127504     | 0.168 | 0.454        | 2.116032e-28 | 21  |
| 1.234942e-32 | CTSH<br>B PLCG2      | -0.4367974     | 0.176 | 0.422        | 2.201779e-28 | 21  |
| 1.826534e-32 | SHKBP1<br>B PLCG2    | -0.5752364     | 0.088 | 0.31         | 3.256527e-28 | 21  |
| 6.3291e-32   | ERGIC3<br>B PLCG2    | -0.4626486     | 0.095 | 0.321        | 1.128415e-27 | 21  |
| 7.367768e-32 | PTPN6<br>B PLCG2     | -0.6603204     | 0.088 | 0.33         | 1.313599e-27 | 21  |
| 3.778596e-31 | ATP5F1D<br>B PLCG2   | -0.3359114     | 0.288 | 0.598        | 6.736858e-27 | 21  |
| 6.092541e-31 | TOP2A<br>B PLCG2     | 1.160598 0.202 | 0.066 | 1.086239e-26 | 21           |     |
| 1.039301e-30 | NDUFA13<br>B PLCG2   | -0.3178415     | 0.313 | 0.621        | 1.85297e-26  | 21  |
| 1.245862e-30 | RTCB<br>B PLCG2      | -0.5537712     | 0.043 | 0.234        | 2.221248e-26 | 21  |
| 1.498138e-30 | ST13<br>B PLCG2      | -0.3187477     | 0.294 | 0.598        | 2.67103e-26  | 21  |
| 1.538566e-30 | TMEM59<br>B PLCG2    | -0.4380471     | 0.18  | 0.456        | 2.743108e-26 | 21  |
| 2.18042e-30  | EIF5A<br>B PLCG2     | -0.6350323     | 0.155 | 0.394        | 3.887471e-26 | 21  |
| 4.645154e-30 | CCT3<br>B PLCG2      | -0.4244069     | 0.211 | 0.493        | 8.281845e-26 | 21  |
| 1.031496e-29 | LINC00926<br>B PLCG2 | -0.7966931     | 0.093 | 0.299        | 1.839053e-25 | 21  |
| 1.128729e-29 |                      | -0.6254884     | 0.079 | 0.309        | 2.012411e-25 | 21  |

|              |                  |                |       |              |                 |
|--------------|------------------|----------------|-------|--------------|-----------------|
| 1.234231e-29 | TMEM147 B PLCG2  | -0.49537 0.211 | 0.497 | 2.20051e-25  | 21              |
| 1.323239e-29 | SP100 B PLCG2    | -0.357685      | 0.275 | 0.56         | 2.359202e-25 21 |
| 1.49443e-29  | PGK1 B PLCG2     | -0.3307831     | 0.207 | 0.497        | 2.66442e-25 21  |
| 1.500626e-29 | THRAP3 B PLCG2   | -0.3641489     | 0.325 | 0.62         | 2.675466e-25 21 |
| 1.605189e-29 | SERBP1 B PLCG2   | 1.031569 0.204 | 0.099 | 2.861892e-25 | 21              |
| 1.832177e-29 | CENPM B PLCG2    | -0.3563254     | 0.116 | 0.357        | 3.266588e-25 21 |
| 2.367209e-29 | DBNL B PLCG2     | 1.120493 0.199 | 0.076 | 4.220498e-25 | 21              |
| 2.904026e-29 | SUGCT B PLCG2    | -0.4329634     | 0.124 | 0.378        | 5.177588e-25 21 |
| 3.074378e-29 | PSMC1 B PLCG2    | 0.8428523      | 0.135 | 0.058        | 5.481309e-25 21 |
| 3.413704e-29 | CENPK B PLCG2    | -0.4142726     | 0.152 | 0.42         | 6.086294e-25 21 |
| 3.675764e-29 | RAB7A B PLCG2    | -0.426301      | 0.176 | 0.453        | 6.55352e-25 21  |
| 5.214696e-29 | DRAP1 B PLCG2    | 0.8760193      | 0.159 | 0.048        | 9.297281e-25 21 |
| 6.880357e-29 | AURKB B PLCG2    | -0.7493798     | 0.185 | 0.476        | 1.226699e-24 21 |
| 6.896487e-29 | CD83 B PLCG2     | -0.5866822     | 0.043 | 0.221        | 1.229575e-24 21 |
| 1.284202e-28 | CCDC50 B PLCG2   | -0.4570308     | 0.066 | 0.27         | 2.289604e-24 21 |
| 1.716277e-28 | PSMD3 B PLCG2    | 1.162446 0.528 | 0.484 | 3.05995e-24  | 21              |
| 1.730368e-28 | NDUFB1 B PLCG2   | -0.4555077     | 0.126 | 0.386        | 3.085072e-24 21 |
| 2.782807e-28 | TXNL1 B PLCG2    | 1.143598 0.204 | 0.093 | 4.961466e-24 | 21              |
| 5.034273e-28 | WDR66 B PLCG2    | -0.693532      | 0.052 | 0.282        | 8.975606e-24 21 |
| 5.657181e-28 | WARS B PLCG2     | 1.197048 0.404 | 0.337 | 1.008619e-23 | 21              |
| 6.429479e-28 | NDUFC1 B PLCG2   | -0.3784786     | 0.145 | 0.37         | 1.146312e-23 21 |
| 6.757269e-28 | CXXC5 B PLCG2    | 0.7615842      | 0.116 | 0.043        | 1.204754e-23 21 |
| 8.034378e-28 | RAD51AP1 B PLCG2 | -0.3286481     | 0.292 | 0.591        | 1.432449e-23 21 |
| 1.270398e-27 | PRR13 B PLCG2    | -0.3324093     | 0.199 | 0.442        | 2.264992e-23 21 |
| 1.404724e-27 | RHOH B PLCG2     | 1.010207 0.159 | 0.052 | 2.504482e-23 | 21              |

|              |            |       |       |              |              |    |
|--------------|------------|-------|-------|--------------|--------------|----|
| CDK1         | B          | PLCG2 |       |              |              |    |
| 1.435275e-27 | -0.4517161 |       | 0.088 | 0.304        | 2.558952e-23 | 21 |
|              | ATP6V0D1   | B     | PLCG2 |              |              |    |
| 1.478065e-27 | -0.4995409 |       | 0.123 | 0.384        | 2.635242e-23 | 21 |
|              | ANXA7      | B     | PLCG2 |              |              |    |
| 2.15118e-27  | -0.3705756 |       | 0.238 | 0.507        | 3.835339e-23 | 21 |
|              | EIF3I      | B     | PLCG2 |              |              |    |
| 2.925995e-27 | -0.4520106 |       | 0.048 | 0.239        | 5.216757e-23 | 21 |
|              | LRPAP1     | B     | PLCG2 |              |              |    |
| 3.097946e-27 | -0.7713585 |       | 0.041 | 0.222        | 5.523327e-23 | 21 |
|              | GBP2       | B     | PLCG2 |              |              |    |
| 3.297237e-27 | -0.3934136 |       | 0.138 | 0.39         | 5.878645e-23 | 21 |
|              | VPS28      | B     | PLCG2 |              |              |    |
| 3.713888e-27 | -0.3824861 |       | 0.244 | 0.538        | 6.62149e-23  | 21 |
|              | ATP6V1F    | B     | PLCG2 |              |              |    |
| 4.519079e-27 | -0.4358051 |       | 0.081 | 0.308        | 8.057065e-23 | 21 |
|              | PSMD11     | B     | PLCG2 |              |              |    |
| 5.411992e-27 | -0.3170813 |       | 0.193 | 0.453        | 9.649041e-23 | 21 |
|              | SF3B5      | B     | PLCG2 |              |              |    |
| 5.566711e-27 | -0.4421378 |       | 0.06  | 0.258        | 9.924889e-23 | 21 |
|              | AC02       | B     | PLCG2 |              |              |    |
| 7.251766e-27 | 1.170299   | 0.435 | 0.339 | 1.292917e-22 | 21           |    |
| LRMP         | B          | PLCG2 |       |              |              |    |
| 7.990545e-27 | -0.3999854 |       | 0.155 | 0.419        | 1.424634e-22 | 21 |
|              | PRRC2C     | B     | PLCG2 |              |              |    |
| 8.355264e-27 | -0.6683667 |       | 0.1   | 0.339        | 1.48966e-22  | 21 |
|              | APOBEC3C   | B     | PLCG2 |              |              |    |
| 9.260167e-27 | -0.5828009 |       | 0.074 | 0.282        | 1.650995e-22 | 21 |
|              | SRM        | B     | PLCG2 |              |              |    |
| 9.45989e-27  | -0.3681921 |       | 0.152 | 0.391        | 1.686604e-22 | 21 |
|              | CUTA       | B     | PLCG2 |              |              |    |
| 1.135379e-26 | 0.888725   | 0.14  | 0.06  | 2.024267e-22 | 21           |    |
| DCAF12       | B          | PLCG2 |       |              |              |    |
| 1.255081e-26 | -0.4882415 |       | 0.143 | 0.392        | 2.237684e-22 | 21 |
|              | ARL6IP5    | B     | PLCG2 |              |              |    |
| 1.399695e-26 | 1.07481    | 0.594 | 0.583 | 2.495517e-22 | 21           |    |
| ANP32B       | B          | PLCG2 |       |              |              |    |
| 1.470411e-26 | -0.323885  |       | 0.19  | 0.459        | 2.621597e-22 | 21 |
|              | PSMD4      | B     | PLCG2 |              |              |    |
| 1.580175e-26 | -0.4539592 |       | 0.13  | 0.387        | 2.817295e-22 | 21 |
|              | C19orf70   | B     | PLCG2 |              |              |    |
| 1.674827e-26 | -0.5094757 |       | 0.288 | 0.608        | 2.986049e-22 | 21 |
|              | CDC42      | B     | PLCG2 |              |              |    |
| 1.808135e-26 | -0.3531461 |       | 0.114 | 0.347        | 3.223724e-22 | 21 |
|              | SNX17      | B     | PLCG2 |              |              |    |
| 1.818651e-26 | -0.6111316 |       | 0.107 | 0.323        | 3.242472e-22 | 21 |
|              | TUBA1A     | B     | PLCG2 |              |              |    |
| 2.187667e-26 | -0.3163535 |       | 0.225 | 0.51         | 3.900392e-22 | 21 |
|              | SRRM1      | B     | PLCG2 |              |              |    |
| 2.746838e-26 | -0.4434978 |       | 0.035 | 0.195        | 4.897337e-22 | 21 |



|              |          |         |            |       |       |              |    |
|--------------|----------|---------|------------|-------|-------|--------------|----|
| 3.749512e-26 | HARS     | B PLCG2 | -0.5147152 | 0.107 | 0.345 | 6.685004e-22 | 21 |
| 3.966394e-26 | PKIG     | B PLCG2 | -0.4660146 | 0.311 | 0.6   | 7.071684e-22 | 21 |
| 4.419017e-26 | LDHA     | B PLCG2 | -0.4415837 | 0.2   | 0.453 | 7.878665e-22 | 21 |
| 4.772356e-26 | ILF2     | B PLCG2 | -0.3050275 | 0.361 | 0.657 | 8.508633e-22 | 21 |
| 4.936966e-26 | UBE2D3   | B PLCG2 | -0.5958981 | 0.1   | 0.33  | 8.802117e-22 | 21 |
| 5.111509e-26 | ZFP36    | B PLCG2 | -0.4439457 | 0.135 | 0.377 | 9.113309e-22 | 21 |
| 5.461492e-26 | PSMC3    | B PLCG2 | -0.393454  | 0.169 | 0.424 | 9.737294e-22 | 21 |
| 5.993114e-26 | ADRM1    | B PLCG2 | 0.8431613  | 0.147 | 0.061 | 1.068512e-21 | 21 |
| 6.433851e-26 | ZWINT    | B PLCG2 | -0.32374   | 0.216 | 0.472 | 1.147091e-21 | 21 |
| 6.903559e-26 | PRDX5    | B PLCG2 | -0.4532618 | 0.086 | 0.307 | 1.230836e-21 | 21 |
| 8.961684e-26 | KARS     | B PLCG2 | -0.4360901 | 0.171 | 0.425 | 1.597779e-21 | 21 |
| 9.85978e-26  | APEX1    | B PLCG2 | -0.4584038 | 0.048 | 0.227 | 1.7579e-21   | 21 |
| 9.893442e-26 | C19orf24 | B PLCG2 | -0.8225275 | 0.035 | 0.199 | 1.763902e-21 | 21 |
| 1.221674e-25 | ACP5     | B PLCG2 | -0.5512304 | 0.052 | 0.226 | 2.178123e-21 | 21 |
| 1.245741e-25 | MAGED2   | B PLCG2 | 1.019543   | 0.214 | 0.102 | 2.221031e-21 | 21 |
| 1.493312e-25 | RMI2     | B PLCG2 | -0.4273612 | 0.155 | 0.388 | 2.662427e-21 | 21 |
| 1.655211e-25 | UQCRC2   | B PLCG2 | -0.5966895 | 0.174 | 0.459 | 2.951075e-21 | 21 |
| 1.67523e-25  | JUNB     | B PLCG2 | -0.5089587 | 0.041 | 0.193 | 2.986768e-21 | 21 |
| 1.698453e-25 | S1PR4    | B PLCG2 | -0.6479152 | 0.06  | 0.243 | 3.028172e-21 | 21 |
| 1.824819e-25 | RGS1     | B PLCG2 | -0.3447758 | 0.278 | 0.568 | 3.253469e-21 | 21 |
| 1.886004e-25 | PCBP1    | B PLCG2 | 0.8881065  | 0.851 | 0.906 | 3.362557e-21 | 21 |
| 1.903139e-25 | ATP5F1E  | B PLCG2 | -0.3525923 | 0.149 | 0.34  | 3.393106e-21 | 21 |
| 1.907405e-25 | SPIB     | B PLCG2 | -0.5213921 | 0.48  | 0.754 | 3.400713e-21 | 21 |
| 1.988819e-25 | CXCR4    | B PLCG2 | 1.095782   | 0.168 | 0.054 | 3.545866e-21 | 21 |
| 2.895819e-25 | UBE2C    | B PLCG2 | -0.414893  | 0.166 | 0.423 | 5.162955e-21 | 21 |

|              |                     |            |       |              |              |       |
|--------------|---------------------|------------|-------|--------------|--------------|-------|
| 5.733237e-25 | KMT2E<br>B PLCG2    | -0.4422678 | 0.085 | 0.296        | 1.022179e-20 | 21    |
| 5.907899e-25 | TNIP1<br>B PLCG2    | -0.3525097 | 0.218 | 0.482        | 1.053319e-20 | 21    |
| 6.318805e-25 | CD47<br>B PLCG2     | 0.8892432  | 0.104 | 0.032        | 1.12658e-20  | 21    |
| 6.637209e-25 | ASPM<br>B PLCG2     | -0.8552085 | 0.067 | 0.271        | 1.183348e-20 | 21    |
| 7.115401e-25 | GPR183<br>B PLCG2   | 1.142754   | 0.38  | 1.268605e-20 | 21           | 0.439 |
| 7.217451e-25 | LSM8<br>B PLCG2     | -0.5577235 | 0.029 | 0.198        | 1.286799e-20 | 21    |
| 7.451627e-25 | AARS<br>B PLCG2     | 0.7522282  | 0.128 | 0.055        | 1.328551e-20 | 21    |
| 7.606101e-25 | SNHG19<br>B PLCG2   | -0.4390217 | 0.062 | 0.239        | 1.356092e-20 | 21    |
| 8.664946e-25 | UBE2L6<br>B PLCG2   | -0.4545383 | 0.086 | 0.288        | 1.544873e-20 | 21    |
| 9.475585e-25 | CNPY3<br>B PLCG2    | 0.5745346  | 0.955 | 0.976        | 1.689402e-20 | 21    |
| 1.085556e-24 | RPS24<br>B PLCG2    | -0.7558501 | 0.021 | 0.174        | 1.935437e-20 | 21    |
| 1.38549e-24  | TNFRSF18<br>B PLCG2 | 0.8550863  | 0.143 | 0.06         | 2.470191e-20 | 21    |
| 1.542164e-24 | HMGB3<br>B PLCG2    | 0.8484366  | 0.154 | 0.078        | 2.749523e-20 | 21    |
| 1.665894e-24 | GMNN<br>B PLCG2     | 0.8075949  | 0.145 | 0.079        | 2.970122e-20 | 21    |
| 2.289753e-24 | UBE2T<br>B PLCG2    | -0.469088  | 0.105 | 0.327        | 4.082401e-20 | 21    |
| 2.432077e-24 | P4HB<br>B PLCG2     | -0.6353172 | 0.064 | 0.258        | 4.336151e-20 | 21    |
| 2.518988e-24 | SRGN<br>B PLCG2     | -0.450806  | 0.09  | 0.294        | 4.491103e-20 | 21    |
| 2.547903e-24 | VPS35<br>B PLCG2    | -0.4157601 | 0.069 | 0.286        | 4.542657e-20 | 21    |
| 2.597242e-24 | DPP7<br>B PLCG2     | 0.8839968  | 0.154 | 0.077        | 4.630623e-20 | 21    |
| 2.64307e-24  | MAD2L1<br>B PLCG2   | -0.5520113 | 0.071 | 0.283        | 4.712329e-20 | 21    |
| 2.867276e-24 | MSM01<br>B PLCG2    | -0.4622928 | 0.081 | 0.269        | 5.112067e-20 | 21    |
| 3.33891e-24  | PMF1<br>B PLCG2     | -0.6813885 | 0.098 | 0.315        | 5.952943e-20 | 21    |
| 4.65396e-24  | HSP90B1<br>B PLCG2  | -0.3001915 | 0.244 | 0.519        | 8.297545e-20 | 21    |
| 5.564874e-24 | VAMP2<br>B PLCG2    | -0.4112371 | 0.04  | 0.209        | 9.921613e-20 | 21    |
| 6.173074e-24 | SND1<br>B PLCG2     | 0.7336499  | 0.119 | 0.055        | 1.100597e-19 | 21    |

|              |          |       |       |            |       |       |              |              |     |
|--------------|----------|-------|-------|------------|-------|-------|--------------|--------------|-----|
| 6.174243e-24 | NSUN6    | B     | PLCG2 | 1.066558   | 0.263 | 0.187 | 1.100806e-19 | 21           |     |
| 6.183609e-24 | PCNA     | B     | PLCG2 | 0.8743075  |       | 0.152 | 0.084        | 1.102476e-19 | 21  |
| 6.217185e-24 | TMEM131L | B     | PLCG2 | -0.5325004 |       | 0.06  | 0.24         | 1.108462e-19 | 21  |
| 7.839452e-24 | CD55     | B     | PLCG2 | -0.734534  |       | 0.014 | 0.16         | 1.397696e-19 | 21  |
| 1.135389e-23 | LMNA     | B     | PLCG2 | -0.4696038 |       | 0.083 | 0.296        | 2.024285e-19 | 21  |
| 1.418499e-23 | ACADVL   | B     | PLCG2 | -0.357993  |       | 0.114 | 0.334        | 2.529043e-19 | 21  |
| 1.9586e-23   | COPZ1    | B     | PLCG2 | -0.3862446 |       | 0.192 | 0.446        | 3.491989e-19 | 21  |
| 1.960609e-23 | CCT6A    | B     | PLCG2 | -0.4125126 |       | 0.083 | 0.276        | 3.495569e-19 | 21  |
| 2.19879e-23  | NAA10    | B     | PLCG2 | -0.4812315 |       | 0.038 | 0.203        | 3.920222e-19 | 21  |
| 2.70377e-23  | TOMM40   | B     | PLCG2 | -0.4224756 |       | 0.086 | 0.292        | 4.820551e-19 | 21  |
| 2.71927e-23  | C7orf50  | B     | PLCG2 | -0.4183594 |       | 0.142 | 0.396        | 4.848187e-19 | 21  |
| 3.172486e-23 | TMED2    | B     | PLCG2 | -0.610235  |       | 0.126 | 0.34         | 5.656224e-19 | 21  |
| 3.196303e-23 | HVCN1    | B     | PLCG2 | -0.326397  |       | 0.168 | 0.387        | 5.698689e-19 | 21  |
| 3.850098e-23 | EVL      | B     | PLCG2 | -0.8154413 |       | 0.102 | 0.318        | 6.86434e-19  | 21  |
| 4.350771e-23 | CD69     | B     | PLCG2 | -0.3364761 |       | 0.197 | 0.458        | 7.75699e-19  | 21  |
| 5.325597e-23 | CTSS     | B     | PLCG2 | 1.126621   | 0.482 | 0.456 | 9.495006e-19 | 21           |     |
| 6.191215e-23 | COX17    | B     | PLCG2 | -0.4487374 |       | 0.071 | 0.257        | 1.103832e-18 | 21  |
| 6.54078e-23  | PQBP1    | B     | PLCG2 | 1.03945    | 0.202 | 0.12  | 1.166156e-18 | 21           | LPP |
| 7.347364e-23 | B        | PLCG2 |       | -1.064762  |       | 0.079 | 0.289        | 1.309961e-18 | 21  |
| 8.282977e-23 | MIR155HG | B     | PLCG2 | -0.3145222 |       | 0.145 | 0.369        | 1.476772e-18 | 21  |
| 1.03161e-22  | POLR2E   | B     | PLCG2 | 0.9325783  |       | 0.164 | 0.098        | 1.839257e-18 | 21  |
| 1.097336e-22 | SYVN1    | B     | PLCG2 | -0.3354998 |       | 0.149 | 0.393        | 1.95644e-18  | 21  |
| 1.100023e-22 | IK       | B     | PLCG2 | -0.3182465 |       | 0.133 | 0.376        | 1.961231e-18 | 21  |
| 1.306308e-22 | ARHGDI1  | B     | PLCG2 | -0.3292537 |       | 0.111 | 0.334        | 2.329017e-18 | 21  |
| 1.326713e-22 | PSMD2    | B     | PLCG2 | -0.4217322 |       | 0.059 | 0.239        | 2.365397e-18 | 21  |

|              |         |         |       |              |              |    |
|--------------|---------|---------|-------|--------------|--------------|----|
| 1.454145e-22 | STIP1   | B PLCG2 | 0.069 | 0.26         | 2.592595e-18 | 21 |
| 1.495376e-22 | NSFL1C  | B PLCG2 | 0.124 | 0.364        | 2.666106e-18 | 21 |
| 2.017035e-22 | TAPBP   | B PLCG2 | 0.242 | 3.596172e-18 | 21           |    |
| 2.066307e-22 | SLBP    | B PLCG2 | 0.187 | 0.113        | 3.684019e-18 | 21 |
| 3.066589e-22 | SKA2    | B PLCG2 | 0.083 | 0.278        | 5.467421e-18 | 21 |
| 3.121334e-22 | ASNA1   | B PLCG2 | 0.048 | 0.218        | 5.565026e-18 | 21 |
| 3.157292e-22 | VPS51   | B PLCG2 | 0.085 | 0.276        | 5.629136e-18 | 21 |
| 3.342587e-22 | ATRAID  | B PLCG2 | 0.363 | 0.639        | 5.959498e-18 | 21 |
| 4.391579e-22 | HERPUD1 | B PLCG2 | 0.097 | 0.297        | 7.829747e-18 | 21 |
| 4.91643e-22  | YTHDF2  | B PLCG2 | 0.093 | 0.28         | 8.765503e-18 | 21 |
| 5.405893e-22 | PIM2    | B PLCG2 | 0.474 | 9.638166e-18 | 21           |    |
| 6.689632e-22 | SNRPD1  | B PLCG2 | 0.187 | 0.115        | 1.192694e-17 | 21 |
| 6.768184e-22 | LMNB1   | B PLCG2 | 0.25  | 0.516        | 1.2067e-17   | 21 |
| 6.936025e-22 | PA2G4   | B PLCG2 | 0.13  | 0.351        | 1.236624e-17 | 21 |
| 7.279839e-22 | CYC1    | B PLCG2 | 0.116 | 0.336        | 1.297922e-17 | 21 |
| 7.641859e-22 | BTK     | B PLCG2 | 0.145 | 0.386        | 1.362467e-17 | 21 |
| 8.509279e-22 | LAPTM4A | B PLCG2 | 0.195 | 0.449        | 1.517119e-17 | 21 |
| 1.158983e-21 | FBL     | B PLCG2 | 0.238 | 0.475        | 2.066351e-17 | 21 |
| 1.369339e-21 | GPSM3   | B PLCG2 | 0.157 | 0.386        | 2.441395e-17 | 21 |
| 1.567615e-21 | ATP6V0B | B PLCG2 | 0.123 | 0.356        | 2.794902e-17 | 21 |
| 2.076345e-21 | ANXA5   | B PLCG2 | 0.233 | 0.5          | 3.701916e-17 | 21 |
| 3.087987e-21 | EIF4G2  | B PLCG2 | 0.841 | 0.9          | 5.505572e-17 | 21 |
| 5.350184e-21 | PFN1    | B PLCG2 | 0.13  | 0.339        | 9.538842e-17 | 21 |
| 6.300334e-21 | CD48    | B PLCG2 | 0.168 | 0.063        | 1.123287e-16 | 21 |
| 6.506789e-21 | BIRC5   | B PLCG2 | 0.128 | 0.33         | 1.160095e-16 | 21 |

|              |          |         |                |       |              |              |    |
|--------------|----------|---------|----------------|-------|--------------|--------------|----|
| 7.614801e-21 | BST2     | B PLCG2 | -0.4498232     | 0.145 | 0.35         | 1.357643e-16 | 21 |
| 7.775643e-21 | TRAF3IP3 | B PLCG2 | -0.6880256     | 0.06  | 0.24         | 1.386319e-16 | 21 |
| 7.824896e-21 | CAPG     | B PLCG2 | 1.020123 0.211 | 0.139 | 1.395101e-16 | 21           |    |
| 8.085938e-21 | MKMK2    | B PLCG2 | 0.7569377      | 0.142 | 0.068        | 1.441642e-16 | 21 |
| 8.490029e-21 | CENPW    | B PLCG2 | -0.3681437     | 0.114 | 0.318        | 1.513687e-16 | 21 |
| 8.546489e-21 | TRAM1    | B PLCG2 | -0.4401887     | 0.054 | 0.212        | 1.523753e-16 | 21 |
| 8.58154e-21  | STX5     | B PLCG2 | -0.5237831     | 0.059 | 0.219        | 1.530003e-16 | 21 |
| 9.638533e-21 | NFKBIE   | B PLCG2 | -0.3746821     | 0.064 | 0.232        | 1.718454e-16 | 21 |
| 1.007581e-20 | DDOST    | B PLCG2 | -0.3546172     | 0.214 | 0.443        | 1.796416e-16 | 21 |
| 1.035143e-20 | FDPS     | B PLCG2 | -0.4273186     | 0.036 | 0.186        | 1.845556e-16 | 21 |
| 1.048805e-20 | PEPD     | B PLCG2 | -0.3674156     | 0.105 | 0.3          | 1.869914e-16 | 21 |
| 1.084798e-20 | PDLIM1   | B PLCG2 | -0.6298026     | 0.052 | 0.22         | 1.934087e-16 | 21 |
| 1.174342e-20 | EIF4EBP1 | B PLCG2 | 0.7016015      | 0.128 | 0.052        | 2.093735e-16 | 21 |
| 1.204756e-20 | SERPINA9 | B PLCG2 | -0.3711917     | 0.218 | 0.483        | 2.14796e-16  | 21 |
| 1.390885e-20 | RSL1D1   | B PLCG2 | -0.3951763     | 0.059 | 0.22         | 2.479808e-16 | 21 |
| 2.288918e-20 | PSMD1    | B PLCG2 | -0.3745934     | 0.209 | 0.459        | 4.080912e-16 | 21 |
| 2.303894e-20 | DDX18    | B PLCG2 | 0.9681106      | 0.63  | 0.646        | 4.107613e-16 | 21 |
| 2.562545e-20 | SNRPG    | B PLCG2 | 0.961114 0.174 | 0.08  | 4.568762e-16 | 21           |    |
| 2.596189e-20 | NUSAP1   | B PLCG2 | -0.5932137     | 0.052 | 0.197        | 4.628746e-16 | 21 |
| 2.772479e-20 | CLEC2B   | B PLCG2 | -0.3621202     | 0.114 | 0.308        | 4.943052e-16 | 21 |
| 2.845372e-20 | FIS1     | B PLCG2 | -0.4614412     | 0.038 | 0.186        | 5.073014e-16 | 21 |
| 3.457284e-20 | FKBP4    | B PLCG2 | -0.4246782     | 0.088 | 0.266        | 6.163991e-16 | 21 |
| 3.518475e-20 | MRPL11   | B PLCG2 | 0.6436127      | 0.126 | 0.06         | 6.273089e-16 | 21 |
| 3.823712e-20 | DLEU2    | B PLCG2 | -0.3084753     | 0.164 | 0.392        | 6.817296e-16 | 21 |
| 3.854456e-20 | CCT5     | B PLCG2 | -0.5064568     | 0.092 | 0.254        | 6.872109e-16 | 21 |

|              |          |         |       |              |              |    |
|--------------|----------|---------|-------|--------------|--------------|----|
| 5.451327e-20 | FCMR     | B PLCG2 | 0.069 | 0.224        | 9.719171e-16 | 21 |
| 6.09361e-20  | CAPN1    | B PLCG2 | 0.114 | 0.323        | 1.08643e-15  | 21 |
| 6.420805e-20 | RHOG     | B PLCG2 | 0.059 | 0.22         | 1.144765e-15 | 21 |
| 6.924825e-20 | MRPL12   | B PLCG2 | 0.086 | 0.288        | 1.234627e-15 | 21 |
| 7.9113e-20   | ATP6AP2  | B PLCG2 | 0.074 | 0.247        | 1.410506e-15 | 21 |
| 1.009488e-19 | VDAC3    | B PLCG2 | 0.135 | 0.357        | 1.799815e-15 | 21 |
| 1.518236e-19 | KPNB1    | B PLCG2 | 0.803 | 2.706863e-15 | 21           | 21 |
| 1.595565e-19 | RPS26    | B PLCG2 | 0.178 | 0.446        | 2.844733e-15 | 21 |
| 2.218559e-19 | CD164    | B PLCG2 | 0.133 | 0.072        | 3.955469e-15 | 21 |
| 2.498272e-19 | HELLS    | B PLCG2 | 0.054 | 0.22         | 4.454169e-15 | 21 |
| 2.551287e-19 | WDR46    | B PLCG2 | 0.073 | 0.234        | 4.548689e-15 | 21 |
| 2.721671e-19 | HSD17B11 | B PLCG2 | 0.067 | 0.24         | 4.852467e-15 | 21 |
| 3.216711e-19 | NELFE    | B PLCG2 | 0.088 | 0.274        | 5.735073e-15 | 21 |
| 3.563451e-19 | BCAP31   | B PLCG2 | 0.081 | 0.253        | 6.353276e-15 | 21 |
| 3.716248e-19 | DNPH1    | B PLCG2 | 0.064 | 0.209        | 6.625699e-15 | 21 |
| 3.744509e-19 | CCDC32   | B PLCG2 | 0.168 | 0.404        | 6.676086e-15 | 21 |
| 3.778722e-19 | CMPK1    | B PLCG2 | 0.048 | 0.199        | 6.737083e-15 | 21 |
| 4.00907e-19  | TSSC4    | B PLCG2 | 0.145 | 0.058        | 7.147772e-15 | 21 |
| 4.182964e-19 | TYMS     | B PLCG2 | 0.107 | 0.055        | 7.457807e-15 | 21 |
| 4.25617e-19  | CENPU    | B PLCG2 | 0.067 | 0.23         | 7.588326e-15 | 21 |
| 4.422853e-19 | DDX54    | B PLCG2 | 0.204 | 0.431        | 7.885504e-15 | 21 |
| 4.698242e-19 | CCT2     | B PLCG2 | 0.04  | 0.187        | 8.376496e-15 | 21 |
| 5.929948e-19 | YIF1A    | B PLCG2 | 0.076 | 0.244        | 1.05725e-14  | 21 |
| 7.40158e-19  | ABCF1    | B PLCG2 | 0.133 | 0.074        | 1.319628e-14 | 21 |
| 1.072275e-18 | DNASE1   | B PLCG2 | 0.041 | 0.212        | 1.911759e-14 | 21 |

|              |           |         |       |             |              |    |
|--------------|-----------|---------|-------|-------------|--------------|----|
| 1.073038e-18 | MGST3     | B PLCG2 | 0.102 | 0.045       | 1.91312e-14  | 21 |
| 1.146025e-18 | EML6      | B PLCG2 | 0.104 | 0.281       | 2.043247e-14 | 21 |
| 1.289253e-18 | IFITM2    | B PLCG2 | 0.1   | 0.285       | 2.298609e-14 | 21 |
| 1.34199e-18  | RPN2      | B PLCG2 | 0.109 | 0.282       | 2.392634e-14 | 21 |
| 1.444733e-18 | DCTN2     | B PLCG2 | 0.052 | 0.198       | 2.575815e-14 | 21 |
| 1.467462e-18 | CHPT1     | B PLCG2 | 0.092 | 0.28        | 2.616338e-14 | 21 |
| 1.496473e-18 | MSN       | B PLCG2 | 0.102 | 0.279       | 2.668061e-14 | 21 |
| 1.632072e-18 | HSPA5     | B PLCG2 | 0.128 | 0.347       | 2.909821e-14 | 21 |
| 1.670627e-18 | INSIG1    | B PLCG2 | 0.169 | 0.412       | 2.97856e-14  | 21 |
| 1.754203e-18 | TXN       | B PLCG2 | 0.1   | 0.269       | 3.127569e-14 | 21 |
| 1.787252e-18 | HHEX      | B PLCG2 | 0.093 | 0.277       | 3.186492e-14 | 21 |
| 1.793468e-18 | SPG21     | B PLCG2 | 0.064 | 0.248       | 3.197575e-14 | 21 |
| 1.840849e-18 | LAMP1     | B PLCG2 | 0.079 | 0.244       | 3.282049e-14 | 21 |
| 2.246805e-18 | PHACTR1   | B PLCG2 | 0.159 | 0.377       | 4.005829e-14 | 21 |
| 2.488642e-18 | TAX1BP1   | B PLCG2 | 0.066 | 0.232       | 4.436999e-14 | 21 |
| 3.364722e-18 | PSMF1     | B PLCG2 | 0.054 | 0.205       | 5.998963e-14 | 21 |
| 3.567481e-18 | MAP2K3    | B PLCG2 | 0.066 | 0.222       | 6.360462e-14 | 21 |
| 4.04383e-18  | C14orf119 | B PLCG2 | 0.078 | 0.25        | 7.209745e-14 | 21 |
| 4.34479e-18  | OSTF1     | B PLCG2 | 0.109 | 0.295       | 7.746326e-14 | 21 |
| 4.458672e-18 | HSPA4     | B PLCG2 | 0.214 | 0.448       | 7.949365e-14 | 21 |
| 5.061714e-18 | C1QBP     | B PLCG2 | 0.092 | 9.02453e-14 | 21           |    |
| 5.467538e-18 | FAM208B   | B PLCG2 | 0.06  | 0.225       | 9.748073e-14 | 21 |
| 5.720621e-18 | TMEM9B    | B PLCG2 | 0.043 | 0.196       | 1.019929e-13 | 21 |
| 6.294409e-18 | FAM50A    | B PLCG2 | 0.374 | 1.12223e-13 | 21           |    |
| 6.577432e-18 | LCP1      | B PLCG2 | 0.05  | 0.205       | 1.17269e-13  | 21 |

|              |                 |        |                |                |       |              |              |    |
|--------------|-----------------|--------|----------------|----------------|-------|--------------|--------------|----|
| 6.849569e-18 | NDFIP1<br>PLAC8 | B<br>B | PLCG2<br>PLCG2 | -0.4651012     | 0.074 | 0.213        | 1.22121e-13  | 21 |
| 6.931667e-18 | HIST1H2AC       |        | B PLCG2        | 0.7616165      | 0.149 | 0.09         | 1.235847e-13 | 21 |
| 7.367906e-18 | CDKN3           |        | B PLCG2        | 0.795337 0.155 | 0.064 | 1.313624e-13 | 21           |    |
| 8.844042e-18 | UBE2J1          |        | B PLCG2        | 0.9715867      | 0.339 | 0.233        | 1.576804e-13 | 21 |
| 9.752361e-18 | NOSIP           |        | B PLCG2        | -0.327145      | 0.083 | 0.255        | 1.738748e-13 | 21 |
| 1.010712e-17 | ASF1B           |        | B PLCG2        | 0.6013556      | 0.111 | 0.046        | 1.801998e-13 | 21 |
| 1.214936e-17 | NPM3            |        | B PLCG2        | -0.4612854     | 0.052 | 0.203        | 2.166109e-13 | 21 |
| 1.264403e-17 | PPM1K           |        | B PLCG2        | -0.3068151     | 0.107 | 0.287        | 2.254304e-13 | 21 |
| 1.339943e-17 | RRM2            |        | B PLCG2        | 0.6985024      | 0.124 | 0.043        | 2.388984e-13 | 21 |
| 1.796511e-17 | MARS            |        | B PLCG2        | -0.3742375     | 0.029 | 0.17         | 3.202999e-13 | 21 |
| 1.873207e-17 | SMC6            |        | B PLCG2        | -0.3885269     | 0.131 | 0.332        | 3.339741e-13 | 21 |
| 1.908639e-17 | BLK             |        | B PLCG2        | -0.3004443     | 0.128 | 0.3          | 3.402912e-13 | 21 |
| 2.021823e-17 | HMOX2           |        | B PLCG2        | -0.356534      | 0.043 | 0.169        | 3.604708e-13 | 21 |
| 2.136378e-17 | SLC50A1         |        | B PLCG2        | -0.4054041     | 0.092 | 0.255        | 3.808949e-13 | 21 |
| 2.463295e-17 | LTA4H           |        | B PLCG2        | -0.3444708     | 0.124 | 0.322        | 4.391808e-13 | 21 |
| 2.482016e-17 | PLPP5           |        | B PLCG2        | -0.4621784     | 0.04  | 0.185        | 4.425186e-13 | 21 |
| 2.578094e-17 | YARS            |        | B PLCG2        | -0.3085916     | 0.038 | 0.19         | 4.596484e-13 | 21 |
| 2.69771e-17  | LGALS1          |        | B PLCG2        | -0.8681655     | 0.067 | 0.208        | 4.809747e-13 | 21 |
| 2.940624e-17 | HMG3            |        | B PLCG2        | 1.039762 0.373 | 0.313 | 5.242838e-13 | 21           |    |
| 3.476763e-17 | FMNL1           |        | B PLCG2        | -0.3808528     | 0.057 | 0.213        | 6.19872e-13  | 21 |
| 3.65506e-17  | SEM1            |        | B PLCG2        | 1.021325 0.468 | 0.448 | 6.516606e-13 | 21           |    |
| 3.773248e-17 | FAM76B          |        | B PLCG2        | 0.7318995      | 0.152 | 0.095        | 6.727324e-13 | 21 |
| 3.978852e-17 | CMSS1           |        | B PLCG2        | -0.3998699     | 0.043 | 0.184        | 7.093896e-13 | 21 |
| 4.271801e-17 | PITHD1          |        | B PLCG2        | -0.4407614     | 0.071 | 0.209        | 7.616193e-13 | 21 |
| 4.870207e-17 |                 |        |                | -0.3429448     | 0.145 | 0.348        | 8.683092e-13 | 21 |



|              |                 |                    |            |       |       |              |    |
|--------------|-----------------|--------------------|------------|-------|-------|--------------|----|
| 4.886616e-17 | DNAJB6<br>SRP72 | B PLCG2<br>B PLCG2 | -0.3095128 | 0.117 | 0.303 | 8.712347e-13 | 21 |
| 5.043935e-17 | CAT             | B PLCG2            | -0.3343587 | 0.078 | 0.208 | 8.992831e-13 | 21 |
| 5.521378e-17 | GARS            | B PLCG2            | -0.4027346 | 0.076 | 0.253 | 9.844065e-13 | 21 |
| 8.184926e-17 | ABCF2.1         | B PLCG2            | -0.3220031 | 0.016 | 0.124 | 1.459291e-12 | 21 |
| 8.513457e-17 | HLA-DRB5        | B PLCG2            | -0.5411715 | 0.254 | 0.507 | 1.517864e-12 | 21 |
| 8.681682e-17 | JUN             | B PLCG2            | -0.3833963 | 0.098 | 0.27  | 1.547857e-12 | 21 |
| 8.712208e-17 | DNPEP           | B PLCG2            | -0.3748547 | 0.04  | 0.181 | 1.5533e-12   | 21 |
| 9.219907e-17 | RBM22           | B PLCG2            | -0.3275958 | 0.066 | 0.216 | 1.643817e-12 | 21 |
| 1.026015e-16 | IMMT            | B PLCG2            | -0.308382  | 0.067 | 0.217 | 1.829282e-12 | 21 |
| 1.386878e-16 | AICDA           | B PLCG2            | 0.8494534  | 0.176 | 0.083 | 2.472666e-12 | 21 |
| 1.837221e-16 | PSAT1           | B PLCG2            | -0.5261403 | 0.021 | 0.138 | 3.275581e-12 | 21 |
| 2.020611e-16 | RPS6KB2         | B PLCG2            | -0.3343492 | 0.048 | 0.191 | 3.602547e-12 | 21 |
| 2.086089e-16 | GADD45B         | B PLCG2            | 1.0658     | 0.278 | 0.277 | 3.719287e-12 | 21 |
| 2.22628e-16  | ORMDL2          | B PLCG2            | -0.3477058 | 0.074 | 0.227 | 3.969234e-12 | 21 |
| 2.316732e-16 | NOP56           | B PLCG2            | -0.3272698 | 0.124 | 0.325 | 4.130501e-12 | 21 |
| 2.384348e-16 | BCL2            | B PLCG2            | -0.4450384 | 0.04  | 0.173 | 4.251055e-12 | 21 |
| 2.756435e-16 | NDUFB3          | B PLCG2            | 1.006722   | 0.394 | 0.386 | 4.914447e-12 | 21 |
| 2.853406e-16 | GCSAM           | B PLCG2            | 0.7779304  | 0.157 | 0.09  | 5.087338e-12 | 21 |
| 2.946266e-16 | TINF2           | B PLCG2            | -0.3132956 | 0.057 | 0.214 | 5.252898e-12 | 21 |
| 3.110291e-16 | IDH3G           | B PLCG2            | -0.3224484 | 0.071 | 0.214 | 5.545339e-12 | 21 |
| 3.112881e-16 | GTPBP6          | B PLCG2            | -0.3311611 | 0.047 | 0.174 | 5.549955e-12 | 21 |
| 3.273235e-16 | FARSA           | B PLCG2            | -0.3551867 | 0.052 | 0.182 | 5.835851e-12 | 21 |
| 3.281172e-16 | CD22            | B PLCG2            | 0.9520411  | 0.313 | 0.263 | 5.850002e-12 | 21 |
| 3.465984e-16 | GRN             | B PLCG2            | -0.3145808 | 0.104 | 0.268 | 6.179503e-12 | 21 |
| 3.630541e-16 |                 |                    | 0.8260895  | 0.25  | 0.197 | 6.472891e-12 | 21 |

|              |          |         |            |       |              |              |    |
|--------------|----------|---------|------------|-------|--------------|--------------|----|
| 4.162688e-16 | POLD4    | B PLCG2 | -0.3343517 | 0.135 | 0.311        | 7.421657e-12 | 21 |
| 4.332942e-16 | CALR     | B PLCG2 | -0.3130529 | 0.054 | 0.179        | 7.725202e-12 | 21 |
| 5.496149e-16 | RRAGA    | B PLCG2 | -0.3061389 | 0.054 | 0.191        | 9.799084e-12 | 21 |
| 5.775597e-16 | NUP88    | B PLCG2 | -0.345387  | 0.064 | 0.208        | 1.029731e-11 | 21 |
| 5.979269e-16 | STXBP2   | B PLCG2 | -0.3145754 | 0.036 | 0.142        | 1.066044e-11 | 21 |
| 6.105094e-16 | SLC43A2  | B PLCG2 | -0.3246271 | 0.093 | 0.255        | 1.088477e-11 | 21 |
| 6.435841e-16 | PRMT2    | B PLCG2 | -0.4389071 | 0.064 | 0.234        | 1.147446e-11 | 21 |
| 6.566416e-16 | TARS     | B PLCG2 | -0.3312939 | 0.052 | 0.193        | 1.170726e-11 | 21 |
| 7.01504e-16  | SAT2     | B PLCG2 | -0.3401439 | 0.102 | 0.278        | 1.250712e-11 | 21 |
| 7.15827e-16  | GL01     | B PLCG2 | 0.7249699  | 0.154 | 0.065        | 1.276248e-11 | 21 |
| 7.45079e-16  | TK1      | B PLCG2 | -0.3402088 | 0.022 | 0.126        | 1.328401e-11 | 21 |
| 8.041059e-16 | RPP38    | B PLCG2 | -0.3076881 | 0.083 | 0.241        | 1.43364e-11  | 21 |
| 8.692355e-16 | FBX07    | B PLCG2 | -0.4236698 | 0.043 | 0.159        | 1.54976e-11  | 21 |
| 9.003692e-16 | TGIF1    | B PLCG2 | -0.3225362 | 0.067 | 0.219        | 1.605268e-11 | 21 |
| 1.067589e-15 | EBP      | B PLCG2 | 1.098215   | 0.189 | 1.903405e-11 | 21           |    |
| 1.167296e-15 | DAAM1    | B PLCG2 | -0.3474716 | 0.076 | 0.208        | 2.081172e-11 | 21 |
| 1.272535e-15 | C16orf74 | B PLCG2 | -0.3396375 | 0.078 | 0.23         | 2.268802e-11 | 21 |
| 1.668894e-15 | NOB1     | B PLCG2 | -0.3996564 | 0.076 | 0.258        | 2.975472e-11 | 21 |
| 2.007544e-15 | NARS     | B PLCG2 | -0.3257881 | 0.022 | 0.132        | 3.57925e-11  | 21 |
| 2.093411e-15 | SRPRB    | B PLCG2 | -0.3331412 | 0.047 | 0.181        | 3.732342e-11 | 21 |
| 2.343767e-15 | SDF4     | B PLCG2 | -0.3536617 | 0.111 | 0.246        | 4.178703e-11 | 21 |
| 2.383874e-15 | RASGRP2  | B PLCG2 | -0.3128529 | 0.048 | 0.161        | 4.250209e-11 | 21 |
| 2.674071e-15 | YIPF3    | B PLCG2 | -0.3035259 | 0.062 | 0.217        | 4.7676e-11   | 21 |
| 2.867029e-15 | SCAMP2   | B PLCG2 | -0.3432707 | 0.029 | 0.147        | 5.111626e-11 | 21 |
| 2.967922e-15 | PRDX4    | B PLCG2 | 0.7776158  | 0.145 | 0.084        | 5.291508e-11 | 21 |

|              |            |         |            |       |       |              |    |
|--------------|------------|---------|------------|-------|-------|--------------|----|
| 3.707145e-15 | TACC3      | B PLCG2 | -0.3053595 | 0.076 | 0.223 | 6.609469e-11 | 21 |
| 4.065875e-15 | COPB2      | B PLCG2 | -0.3463879 | 0.038 | 0.155 | 7.249048e-11 | 21 |
| 4.12297e-15  | PGD        | B PLCG2 | -0.3183741 | 0.05  | 0.186 | 7.350843e-11 | 21 |
| 4.695563e-15 | CSNK1D     | B PLCG2 | 0.8522569  | 0.142 | 0.1   | 8.371719e-11 | 21 |
| 5.753686e-15 | AC084033.3 | B PLCG2 | -0.3144584 | 0.111 | 0.291 | 1.025825e-10 | 21 |
| 7.527669e-15 | TMC01      | B PLCG2 | -0.3982259 | 0.052 | 0.184 | 1.342108e-10 | 21 |
| 8.752279e-15 | ARL2       | B PLCG2 | -0.3263196 | 0.026 | 0.132 | 1.560444e-10 | 21 |
| 9.576447e-15 | SLC39A1    | B PLCG2 | -0.3243114 | 0.093 | 0.284 | 1.707385e-10 | 21 |
| 1.118008e-14 | MT-ND4L    | B PLCG2 | -0.3516739 | 0.047 | 0.169 | 1.993297e-10 | 21 |
| 1.19455e-14  | GOLGA4     | B PLCG2 | -0.4796792 | 0.036 | 0.168 | 2.129762e-10 | 21 |
| 1.19713e-14  | CBX6       | B PLCG2 | -0.3754687 | 0.088 | 0.254 | 2.134364e-10 | 21 |
| 1.216589e-14 | NFE2L2     | B PLCG2 | -0.3563041 | 0.035 | 0.17  | 2.169056e-10 | 21 |
| 1.278558e-14 | TNIP2      | B PLCG2 | -0.3128293 | 0.019 | 0.108 | 2.279541e-10 | 21 |
| 1.410924e-14 | LEPROTL1   | B PLCG2 | -0.3971893 | 0.143 | 0.321 | 2.515537e-10 | 21 |
| 1.449154e-14 | SEC11C     | B PLCG2 | -0.3007647 | 0.036 | 0.15  | 2.583697e-10 | 21 |
| 1.452048e-14 | MRPS30     | B PLCG2 | -0.3539425 | 0.031 | 0.141 | 2.588856e-10 | 21 |
| 1.590906e-14 | RAB29      | B PLCG2 | 0.9825059  | 0.446 | 0.435 | 2.836427e-10 | 21 |
| 1.683497e-14 | ROM01      | B PLCG2 | 0.8794648  | 0.472 | 0.469 | 3.001507e-10 | 21 |
| 1.722669e-14 | SNRPF      | B PLCG2 | -0.3246778 | 0.043 | 0.164 | 3.071346e-10 | 21 |
| 1.847141e-14 | KIAA1551   | B PLCG2 | 0.6156929  | 0.1   | 0.051 | 3.293267e-10 | 21 |
| 2.299545e-14 | APOLD1     | B PLCG2 | -0.5308655 | 0.022 | 0.127 | 4.099858e-10 | 21 |
| 2.665792e-14 | LGALS3     | B PLCG2 | -0.3582176 | 0.045 | 0.174 | 4.752841e-10 | 21 |
| 2.948662e-14 | TIMM44     | B PLCG2 | 0.960897   | 0.385 | 0.346 | 5.25717e-10  | 21 |
| 3.015128e-14 | BIRC3      | B PLCG2 | -0.3848841 | 0.124 | 0.32  | 5.375672e-10 | 21 |
| 3.054024e-14 | DDX21      | B PLCG2 | -0.3561198 | 0.045 | 0.174 | 5.445019e-10 | 21 |

|              |          |         |            |       |       |              |    |
|--------------|----------|---------|------------|-------|-------|--------------|----|
| 3.251021e-14 | SBDS     | B PLCG2 | -0.3135393 | 0.142 | 0.305 | 5.796246e-10 | 21 |
| 3.516722e-14 | ZFP36L2  | B PLCG2 | -0.312554  | 0.057 | 0.198 | 6.269963e-10 | 21 |
| 3.973906e-14 | ATIC     | B PLCG2 | -0.5252739 | 0.052 | 0.2   | 7.085077e-10 | 21 |
| 3.982904e-14 | YBX3     | B PLCG2 | -0.3257426 | 0.062 | 0.212 | 7.101119e-10 | 21 |
| 4.432506e-14 | DNTTIP2  | B PLCG2 | -0.3055225 | 0.078 | 0.238 | 7.902716e-10 | 21 |
| 4.779908e-14 | EIF2S1   | B PLCG2 | -0.3172431 | 0.074 | 0.232 | 8.522098e-10 | 21 |
| 5.749572e-14 | TTC19    | B PLCG2 | -0.3238214 | 0.085 | 0.228 | 1.025091e-09 | 21 |
| 5.809775e-14 | ALKBH7   | B PLCG2 | -0.5076871 | 0.031 | 0.138 | 1.035825e-09 | 21 |
| 5.913067e-14 | FCER2    | B PLCG2 | -0.3019782 | 0.029 | 0.125 | 1.054241e-09 | 21 |
| 6.771337e-14 | SART1    | B PLCG2 | -0.4538018 | 0.029 | 0.143 | 1.207262e-09 | 21 |
| 8.686547e-14 | LY9      | B PLCG2 | -0.467706  | 0.052 | 0.165 | 1.548725e-09 | 21 |
| 9.285841e-14 | MARCKS   | B PLCG2 | 0.8240865  | 0.264 | 0.24  | 1.655573e-09 | 21 |
| 9.488541e-14 | SRSF1    | B PLCG2 | -0.3034453 | 0.105 | 0.25  | 1.691712e-09 | 21 |
| 1.124539e-13 | SNRPN    | B PLCG2 | -0.3277138 | 0.035 | 0.15  | 2.00494e-09  | 21 |
| 1.228857e-13 | PIP4P1   | B PLCG2 | -0.3050031 | 0.055 | 0.186 | 2.190929e-09 | 21 |
| 1.392292e-13 | MVD      | B PLCG2 | -0.3035395 | 0.062 | 0.195 | 2.482318e-09 | 21 |
| 1.405727e-13 | HSPB1    | B PLCG2 | -0.3274284 | 0.136 | 0.329 | 2.506271e-09 | 21 |
| 1.412545e-13 | PMAIP1   | B PLCG2 | -0.3009284 | 0.036 | 0.135 | 2.518427e-09 | 21 |
| 1.438609e-13 | UNC45A   | B PLCG2 | -0.318342  | 0.047 | 0.16  | 2.564895e-09 | 21 |
| 1.634143e-13 | EVI2A    | B PLCG2 | -0.3238729 | 0.038 | 0.147 | 2.913514e-09 | 21 |
| 1.635146e-13 | SLC39A3  | B PLCG2 | -0.3458172 | 0.076 | 0.211 | 2.915303e-09 | 21 |
| 1.666561e-13 | SELENOS  | B PLCG2 | -0.3223564 | 0.095 | 0.242 | 2.971312e-09 | 21 |
| 2.638864e-13 | MYDGF    | B PLCG2 | 0.8187796  | 0.225 | 0.16  | 4.704831e-09 | 21 |
| 3.172805e-13 | C12orf75 | B PLCG2 | -0.325578  | 0.059 | 0.207 | 5.656795e-09 | 21 |
| 3.392856e-13 | MT-ND6   | B PLCG2 | -0.3733271 | 0.054 | 0.171 | 6.049122e-09 | 21 |

|              |                      |            |       |       |              |    |
|--------------|----------------------|------------|-------|-------|--------------|----|
| 4.040598e-13 | CYSTM1 B PLCG2       | 0.8409703  | 0.477 | 0.49  | 7.203981e-09 | 21 |
| 5.383674e-13 | CBX3 B PLCG2         | -0.3116242 | 0.021 | 0.13  | 9.598552e-09 | 21 |
| 5.711245e-13 | EEA1 B PLCG2         | -0.3077559 | 0.09  | 0.234 | 1.018258e-08 | 21 |
| 5.724767e-13 | EPB41L4A-AS1 B PLCG2 | -0.3818907 | 0.021 | 0.119 | 1.020669e-08 | 21 |
| 6.969848e-13 | FCGR2B B PLCG2       | -0.3136902 | 0.026 | 0.119 | 1.242654e-08 | 21 |
| 6.9869e-13   | HPCAL1 B PLCG2       | -0.331061  | 0.126 | 0.286 | 1.245694e-08 | 21 |
| 1.095422e-12 | GNG7 B PLCG2         | -0.3250656 | 0.043 | 0.174 | 1.953027e-08 | 21 |
| 1.197654e-12 | ASNS B PLCG2         | -0.3785012 | 0.028 | 0.124 | 2.135297e-08 | 21 |
| 1.451544e-12 | RAB13 B PLCG2        | 0.7929197  | 0.23  | 0.193 | 2.587958e-08 | 21 |
| 1.57153e-12  | CBX5 B PLCG2         | -0.3187966 | 0.057 | 0.19  | 2.80188e-08  | 21 |
| 2.104169e-12 | GPATCH4 B PLCG2      | 0.7412443  | 0.195 | 0.161 | 3.751523e-08 | 21 |
| 2.201581e-12 | TMP0 B PLCG2         | 0.5997385  | 0.1   | 0.046 | 3.925199e-08 | 21 |
| 2.301861e-12 | SOX4 B PLCG2         | 1.081813   | 0.207 | 0.133 | 4.103988e-08 | 21 |
| 3.048507e-12 | NEIL1 B PLCG2        | -0.324841  | 0.017 | 0.102 | 5.435183e-08 | 21 |
| 3.334908e-12 | RHOC B PLCG2         | -0.3358472 | 0.022 | 0.118 | 5.945808e-08 | 21 |
| 3.835569e-12 | SLAMF1 B PLCG2       | 0.6268047  | 0.1   | 0.065 | 6.838437e-08 | 21 |
| 4.016815e-12 | UHRF2 B PLCG2        | -0.5171532 | 0.076 | 0.21  | 7.16158e-08  | 21 |
| 5.30676e-12  | FOS B PLCG2          | -0.4450642 | 0.13  | 0.301 | 9.461422e-08 | 21 |
| 5.596627e-12 | NME1 B PLCG2         | -0.3088964 | 0.029 | 0.124 | 9.978226e-08 | 21 |
| 6.079455e-12 | HTATIP2 B PLCG2      | -0.360616  | 0.069 | 0.196 | 1.083906e-07 | 21 |
| 6.281284e-12 | ADK B PLCG2          | -0.3010046 | 0.033 | 0.127 | 1.11989e-07  | 21 |
| 6.628271e-12 | ZEB2 B PLCG2         | 0.6843682  | 0.157 | 0.124 | 1.181754e-07 | 21 |
| 7.622235e-12 | TLE4 B PLCG2         | 0.8188971  | 0.173 | 0.129 | 1.358968e-07 | 21 |
| 8.2059e-12   | STIM2 B PLCG2        | -0.3740937 | 0.029 | 0.113 | 1.46303e-07  | 21 |
| 8.575951e-12 | P2RY10 B PLCG2       | -0.3830243 | 0.057 | 0.187 | 1.529006e-07 | 21 |

|              |                    |                |       |              |              |    |
|--------------|--------------------|----------------|-------|--------------|--------------|----|
| 9.201071e-12 | WDR43<br>B PLCG2   | -0.3471363     | 0.079 | 0.227        | 1.640459e-07 | 21 |
| 9.285944e-12 | TMEM109<br>B PLCG2 | 0.659711 0.152 | 0.12  | 1.655591e-07 | 21           |    |
| 9.94272e-12  | SNHG9<br>B PLCG2   | -0.6662378     | 0.073 | 0.183        | 1.772687e-07 | 21 |
| 1.234882e-11 | XBP1<br>B PLCG2    | -0.408579      | 0.036 | 0.159        | 2.201671e-07 | 21 |
| 1.239086e-11 | SLC2A3<br>B PLCG2  | 0.489943 0.102 | 0.062 | 2.209166e-07 | 21           |    |
| 1.265466e-11 | ORC6<br>B PLCG2    | -0.3285419     | 0.029 | 0.127        | 2.2562e-07   | 21 |
| 1.299873e-11 | MAP4<br>B PLCG2    | 0.7639629      | 0.202 | 0.167        | 2.317544e-07 | 21 |
| 1.935189e-11 | CCDC167<br>B PLCG2 | 0.667159 0.109 | 0.062 | 3.450248e-07 | 21           |    |
| 2.431941e-11 | HOPX<br>B PLCG2    | 0.8937274      | 0.454 | 0.452        | 4.335908e-07 | 21 |
| 2.561439e-11 | MRPL51<br>B PLCG2  | -0.3016211     | 0.019 | 0.116        | 4.566789e-07 | 21 |
| 2.774575e-11 | PYCR1<br>B PLCG2   | 0.9849945      | 0.339 | 0.321        | 4.94679e-07  | 21 |
| 3.548385e-11 | NAA38<br>B PLCG2   | -0.3386947     | 0.059 | 0.176        | 6.326416e-07 | 21 |
| 4.894118e-11 | ASAH1<br>B PLCG2   | -0.3397537     | 0.038 | 0.151        | 8.725723e-07 | 21 |
| 7.136541e-11 | CELF2<br>B PLCG2   | 0.5956661      | 0.105 | 0.067        | 1.272374e-06 | 21 |
| 9.537729e-11 | FAM200B<br>B PLCG2 | 0.5340523      | 0.107 | 0.067        | 1.700482e-06 | 21 |
| 1.070524e-10 | SG01<br>B PLCG2    | -0.3017387     | 0.047 | 0.155        | 1.908638e-06 | 21 |
| 1.54975e-10  | RILPL2<br>B PLCG2  | 0.5386693      | 0.109 | 0.074        | 2.76305e-06  | 21 |
| 1.559044e-10 | CUX1<br>B PLCG2    | -0.3355107     | 0.059 | 0.181        | 2.779619e-06 | 21 |
| 1.893572e-10 | RHOF<br>B PLCG2    | -0.3037729     | 0.045 | 0.149        | 3.376049e-06 | 21 |
| 1.973927e-10 | MVP<br>B PLCG2     | 0.5762356      | 0.104 | 0.07         | 3.519315e-06 | 21 |
| 2.081853e-10 | NUP210<br>B PLCG2  | 0.6318656      | 0.105 | 0.074        | 3.711736e-06 | 21 |
| 2.402091e-10 | PAG1<br>B PLCG2    | 0.5150567      | 0.107 | 0.075        | 4.282688e-06 | 21 |
| 2.74036e-10  | EZH2<br>B PLCG2    | 0.5541216      | 0.104 | 0.078        | 4.885789e-06 | 21 |
| 2.832328e-10 | WEE1<br>B PLCG2    | 0.9389085      | 0.375 | 0.348        | 5.049757e-06 | 21 |
| 2.932688e-10 | S100A10<br>B PLCG2 | -0.3149559     | 0.026 | 0.116        | 5.228689e-06 | 21 |

|              |            |   |       |            |       |       |              |    |
|--------------|------------|---|-------|------------|-------|-------|--------------|----|
| 4.34369e-10  | ENTPD1     | B | PLCG2 | -0.3062513 | 0.064 | 0.161 | 7.744364e-06 | 21 |
| 4.705849e-10 | AIDA       | B | PLCG2 | -0.3431996 | 0.079 | 0.219 | 8.390059e-06 | 21 |
| 6.020483e-10 | HMGCS1     | B | PLCG2 | 0.8264845  | 0.269 | 0.201 | 1.073392e-05 | 21 |
| 6.384559e-10 | HMCE5      | B | PLCG2 | 0.8436392  | 0.268 | 0.268 | 1.138303e-05 | 21 |
| 7.805551e-10 | TXNDC17    | B | PLCG2 | -0.339652  | 0.126 | 0.28  | 1.391652e-05 | 21 |
| 8.53862e-10  | ADAM28     | B | PLCG2 | 0.6989095  | 0.131 | 0.108 | 1.522351e-05 | 21 |
| 9.287117e-10 | PHF6       | B | PLCG2 | -0.5984945 | 0.038 | 0.132 | 1.6558e-05   | 21 |
| 9.919615e-10 | MYC        | B | PLCG2 | 0.7886712  | 0.237 | 0.238 | 1.768568e-05 | 21 |
| 1.210274e-09 | AMD1       | B | PLCG2 | -0.3331615 | 0.047 | 0.147 | 2.157798e-05 | 21 |
| 1.239223e-09 | TSPYL1     | B | PLCG2 | -0.3083249 | 0.052 | 0.149 | 2.209411e-05 | 21 |
| 1.798089e-09 | ARRDC2     | B | PLCG2 | 0.7381493  | 0.25  | 0.233 | 3.205812e-05 | 21 |
| 1.855126e-09 | CHCHD10    | B | PLCG2 | 0.8393702  | 0.282 | 0.268 | 3.307504e-05 | 21 |
| 2.041575e-09 | MBNL1      | B | PLCG2 | 0.7732267  | 0.527 | 0.595 | 3.639924e-05 | 21 |
| 2.532682e-09 | TBCA       | B | PLCG2 | -0.3521008 | 0.033 | 0.134 | 4.515519e-05 | 21 |
| 2.980961e-09 | AC016831.5 | B | PLCG2 | 0.937944   | 0.484 | 0.507 | 5.314755e-05 | 21 |
| 3.022269e-09 | MZT2B      | B | PLCG2 | -0.3535932 | 0.078 | 0.201 | 5.388403e-05 | 21 |
| 3.897241e-09 | PPP3CA     | B | PLCG2 | 0.7375697  | 0.145 | 0.121 | 6.948391e-05 | 21 |
| 4.932771e-09 | EPS15      | B | PLCG2 | 0.731143   | 0.152 | 0.145 | 8.794637e-05 | 21 |
| 5.670807e-09 | DNAJC10    | B | PLCG2 | 0.7922791  | 0.418 | 0.457 | 0.0001011048 | 21 |
| 6.336684e-09 | LSM5       | B | PLCG2 | 0.7722502  | 0.309 | 0.289 | 0.0001129767 | 21 |
| 6.88079e-09  | DCK        | B | PLCG2 | 0.6759752  | 0.155 | 0.128 | 0.0001226776 | 21 |
| 8.552293e-09 | RABGAP1L   | B | PLCG2 | 0.5816885  | 0.105 | 0.047 | 0.0001524788 | 21 |
| 9.96262e-09  | CDC20      | B | PLCG2 | 0.797599   | 0.219 | 0.169 | 0.0001776236 | 21 |
| 1.093167e-08 | SMC4       | B | PLCG2 | 0.8337808  | 0.238 | 0.237 | 0.0001949007 | 21 |
| 1.323852e-08 | AC004687.1 | B | PLCG2 | 0.6764199  | 0.242 | 0.222 | 0.0002360296 | 21 |

|              |                          |         |       |              |              |    |
|--------------|--------------------------|---------|-------|--------------|--------------|----|
| 1.529624e-08 | THUMPD3-AS1<br>-0.316131 | B PLCG2 | 0.022 | 0.107        | 0.0002727167 | 21 |
| 1.547395e-08 | AC058791.1<br>SNX9       | B PLCG2 | 0.028 | 0.11         | 0.0002758851 | 21 |
| 1.636513e-08 | 0.7955985                |         | 0.195 | 0.168        | 0.000291774  | 21 |
| 1.663554e-08 | SEL1L3<br>CALM2          | B PLCG2 | 0.701 | 0.807        | 0.0002965951 | 21 |
| 1.832522e-08 | -0.3218614<br>MTSS1      | B PLCG2 | 0.024 | 0.106        | 0.0003267203 | 21 |
| 2.251884e-08 | 0.7664887<br>USP34       | B PLCG2 | 0.211 | 0.195        | 0.0004014883 | 21 |
| 2.309872e-08 | 0.5755961<br>PTPN7       | B PLCG2 | 0.128 | 0.1          | 0.0004118271 | 21 |
| 2.421716e-08 | 0.567812                 | 0.105   | 0.052 | 0.0004317677 | 21           |    |
| 2.497506e-08 | CENPF<br>CCNB2           | B PLCG2 | 0.105 | 0.054        | 0.0004452804 | 21 |
| 2.791478e-08 | 0.8365732<br>NDUFA1      | B PLCG2 | 0.558 | 0.621        | 0.0004976926 | 21 |
| 3.066652e-08 | -0.3120017<br>FAM215B    | B PLCG2 | 0.064 | 0.164        | 0.0005467533 | 21 |
| 3.854546e-08 | 0.5984274<br>IMMP1L      | B PLCG2 | 0.13  | 0.107        | 0.000687227  | 21 |
| 5.39606e-08  | 0.7938687<br>ARPC5       | B PLCG2 | 0.539 | 0.615        | 0.0009620635 | 21 |
| 6.689943e-08 | 0.4823049<br>EPM2AIP1    | B PLCG2 | 0.1   | 0.075        | 0.00119275   | 21 |
| 7.011078e-08 | 0.6281258<br>TFDP1       | B PLCG2 | 0.188 | 0.168        | 0.001250005  | 21 |
| 9.705576e-08 | 0.7323212<br>DEF8        | B PLCG2 | 0.187 | 0.165        | 0.001730407  | 21 |
| 1.060711e-07 | 0.7899454<br>ATP5IF1     | B PLCG2 | 0.525 | 0.557        | 0.001891142  | 21 |
| 1.138965e-07 | 0.699171                 | 0.283   | 0.274 | 0.002030661  | 21           |    |
| 1.430678e-07 | RSRP1<br>HSPB11          | B PLCG2 | 0.261 | 0.263        | 0.002550755  | 21 |
| 1.455358e-07 | 0.5925508<br>LINC01857   | B PLCG2 | 0.109 | 0.072        | 0.002594758  | 21 |
| 1.682681e-07 | 0.5952963<br>PRKD3       | B PLCG2 | 0.138 | 0.127        | 0.003000051  | 21 |
| 1.852342e-07 | 0.8107288<br>COX6C       | B PLCG2 | 0.644 | 0.724        | 0.003302541  | 21 |
| 2.112097e-07 | 0.5208357<br>DCP2        | B PLCG2 | 0.116 | 0.089        | 0.003765658  | 21 |
| 2.131468e-07 | 0.3377396<br>RPL31       | B PLCG2 | 0.964 | 0.996        | 0.003800194  | 21 |
| 2.141207e-07 | 0.6042083                |         | 0.145 | 0.136        | 0.003817559  | 21 |



|          |   |       |              |           |       |       |             |    |
|----------|---|-------|--------------|-----------|-------|-------|-------------|----|
| CETN3    | B | PLCG2 | 2.157647e-07 | 0.5801114 | 0.123 | 0.097 | 0.003846869 | 21 |
| STAG3    | B | PLCG2 | 2.488655e-07 | 0.7425656 | 0.168 | 0.155 | 0.004437023 | 21 |
| JUND     | B | PLCG2 | 2.916446e-07 | 0.4640803 | 0.105 | 0.082 | 0.005199731 | 21 |
| RFC4     | B | PLCG2 | 3.557515e-07 | 0.4938968 | 0.119 | 0.099 | 0.006342694 | 21 |
| GON7     | B | PLCG2 | 4.524258e-07 | 0.4772796 | 0.105 | 0.077 | 0.008066299 | 21 |
| GINS2    | B | PLCG2 | 5.365512e-07 | 0.6481135 | 0.166 | 0.143 | 0.009566171 | 21 |
| RAB30    | B | PLCG2 | 5.550505e-07 | 0.8494362 | 0.466 | 0.493 | 0.009895995 | 21 |
| C4orf3   | B | PLCG2 | 5.5867e-07   | 0.7572764 | 0.37  | 0.401 | 0.009960527 | 21 |
| ENY2     | B | PLCG2 | 6.069992e-07 | 0.6312678 | 0.183 | 0.174 | 0.01082219  | 21 |
| NUDT1    | B | PLCG2 | 7.174155e-07 | 0.6244211 | 0.589 | 0.588 | 0.0127908   | 21 |
| MARCKSL1 | B | PLCG2 | 1.292273e-06 | 0.5367066 | 0.131 | 0.115 | 0.02303994  | 21 |
| FEN1     | B | PLCG2 | 1.432828e-06 | 0.8460493 | 0.249 | 0.259 | 0.0255459   | 21 |
| SYNE2    | B | PLCG2 | 2.061903e-06 | 0.4415926 | 0.117 | 0.1   | 0.03676166  | 21 |
| SYNC     | B | PLCG2 | 2.214177e-06 | 0.6832097 | 0.744 | 0.831 | 0.03947657  | 21 |
| UQCRB    | B | PLCG2 | 2.33659e-06  | 0.7984672 | 0.58  | 0.66  | 0.04165906  | 21 |
| UBL5     | B | PLCG2 | 2.663388e-06 | 0.5860262 | 0.183 | 0.154 | 0.04748554  | 21 |
| MCM7     | B | PLCG2 | 2.804314e-06 | 0.5397257 | 0.173 | 0.159 | 0.04999811  | 21 |
| VRK1     | B | PLCG2 | 3.013347e-06 | 0.763465  | 0.226 | 0.23  | 0.05372497  | 21 |
| CKS2     | B | PLCG2 | 3.626649e-06 | 0.6948073 | 0.444 | 0.485 | 0.06465953  | 21 |
| RPS27L   | B | PLCG2 | 3.711503e-06 | 0.6932746 | 0.66  | 0.747 | 0.06617239  | 21 |
| SNRPD2   | B | PLCG2 | 3.877112e-06 | 0.5262272 | 0.145 | 0.139 | 0.06912503  | 21 |
| ITGB3BP  | B | PLCG2 | 4.166002e-06 | 0.6220803 | 0.164 | 0.169 | 0.07427564  | 21 |
| TARDBP   | B | PLCG2 | 4.311198e-06 | 0.4936851 | 0.123 | 0.111 | 0.07686435  | 21 |
| RAD51C   | B | PLCG2 | 4.44177e-06  | 0.6905426 | 0.244 | 0.236 | 0.07919232  | 21 |
| DSTN     | B | PLCG2 | 4.872224e-06 | 0.6967526 | 0.249 | 0.271 | 0.08686688  | 21 |

|              |           |       |       |           |    |  |
|--------------|-----------|-------|-------|-----------|----|--|
| MRPL33       | B         | PLCG2 |       |           |    |  |
| 5.962015e-06 | 0.5416379 | 0.131 | 0.117 | 0.1062968 | 21 |  |
| BRWD1        | B         | PLCG2 |       |           |    |  |
| 6.222835e-06 | 0.609623  | 0.169 | 0.163 | 0.1109469 | 21 |  |
| LYPLAL1      | B         | PLCG2 |       |           |    |  |
| 6.379181e-06 | 0.5787055 | 0.104 | 0.07  | 0.1137344 | 21 |  |
| RASSF6       | B         | PLCG2 |       |           |    |  |
| 6.437196e-06 | 0.7935898 | 0.195 | 0.16  | 0.1147688 | 21 |  |
| SUSD3        | B         | PLCG2 |       |           |    |  |
| 6.626677e-06 | 0.5560833 | 0.123 | 0.104 | 0.118147  | 21 |  |
| LNPEP        | B         | PLCG2 |       |           |    |  |
| 9.548623e-06 | 0.7489819 | 0.237 | 0.206 | 0.1702424 | 21 |  |
| EAF2         | B         | PLCG2 |       |           |    |  |
| 9.772147e-06 | 0.5062188 | 0.112 | 0.104 | 0.1742276 | 21 |  |
| BCL2L12      | B         | PLCG2 |       |           |    |  |
| 1.22305e-05  | 0.652645  | 0.278 | 0.291 | 0.2180575 | 21 |  |
| SIVA1        | B         | PLCG2 |       |           |    |  |
| 1.495289e-05 | 0.6373761 | 0.168 | 0.146 | 0.266595  | 21 |  |
| SEC14L1      | B         | PLCG2 |       |           |    |  |
| 1.866888e-05 | 0.5992224 | 0.152 | 0.12  | 0.3328475 | 21 |  |
| VNN2         | B         | PLCG2 |       |           |    |  |
| 1.871909e-05 | 0.6443763 | 0.244 | 0.257 | 0.3337426 | 21 |  |
| MDM4         | B         | PLCG2 |       |           |    |  |
| 1.88352e-05  | 0.6073046 | 0.188 | 0.19  | 0.3358127 | 21 |  |
| LBR          | B         | PLCG2 |       |           |    |  |
| 1.933824e-05 | 0.5971989 | 0.214 | 0.193 | 0.3447814 | 21 |  |
| DNMT1        | B         | PLCG2 |       |           |    |  |
| 2.054792e-05 | 0.5345616 | 0.105 | 0.06  | 0.3663489 | 21 |  |
| MKI67        | B         | PLCG2 |       |           |    |  |
| 2.150528e-05 | 0.4136419 | 0.105 | 0.091 | 0.3834177 | 21 |  |
| MSH6         | B         | PLCG2 |       |           |    |  |
| 2.693155e-05 | 0.5288697 | 0.112 | 0.107 | 0.4801625 | 21 |  |
| MAT2A        | B         | PLCG2 |       |           |    |  |
| 3.050805e-05 | 0.5169096 | 0.131 | 0.136 | 0.543928  | 21 |  |
| PUS7L        | B         | PLCG2 |       |           |    |  |
| 3.895703e-05 | 0.772247  | 0.193 | 0.153 | 0.6945648 | 21 |  |
| CD81         | B         | PLCG2 |       |           |    |  |
| 3.903799e-05 | 0.4825067 | 0.114 | 0.115 | 0.6960082 | 21 |  |
| EBF1         | B         | PLCG2 |       |           |    |  |
| 4.021544e-05 | 0.6367424 | 0.364 | 0.402 | 0.7170011 | 21 |  |
| RPA3         | B         | PLCG2 |       |           |    |  |
| 4.870195e-05 | 0.4157201 | 0.119 | 0.111 | 0.8683071 | 21 |  |
| NFYB         | B         | PLCG2 |       |           |    |  |
| 5.217066e-05 | 0.4584545 | 0.104 | 0.098 | 0.9301507 | 21 |  |
| RAB30-AS1    | B         | PLCG2 |       |           |    |  |
| 5.372886e-05 | 0.6514377 | 0.321 | 0.349 | 0.9579318 | 21 |  |
| NASP         | B         | PLCG2 |       |           |    |  |
| 5.492227e-05 | 0.5376941 | 0.105 | 0.107 | 0.9792091 | 21 |  |
| TCF3         | B         | PLCG2 |       |           |    |  |
| 5.51655e-05  | 0.6403995 | 0.199 | 0.148 | 0.9835456 | 21 |  |

|              |   |            |       |       |   |    |       |   |
|--------------|---|------------|-------|-------|---|----|-------|---|
| BIK          | B | PLCG2      |       |       |   |    |       |   |
| 5.9092e-05   |   | 0.5063723  | 0.121 | 0.108 | 1 | 21 |       |   |
| OGG1         | B | PLCG2      |       |       |   |    |       |   |
| 5.957092e-05 |   | 0.6344155  | 0.307 | 0.313 | 1 | 21 |       |   |
| PSIP1        | B | PLCG2      |       |       |   |    |       |   |
| 6.294464e-05 |   | 0.6652344  | 0.594 | 0.676 | 1 | 21 |       |   |
| ATP5ME       | B | PLCG2      |       |       |   |    |       |   |
| 6.74143e-05  |   | 0.6182993  | 0.155 | 0.157 | 1 | 21 |       |   |
| SMIM20       | B | PLCG2      |       |       |   |    |       |   |
| 7.23015e-05  |   | 0.4647614  | 0.155 | 0.153 | 1 | 21 |       |   |
| MZT1         | B | PLCG2      |       |       |   |    |       |   |
| 7.790702e-05 |   | 0.523523   | 0.126 | 0.107 | 1 | 21 | E2F5  | B |
| PLCG2        |   |            |       |       |   |    |       |   |
| 9.097833e-05 |   | 0.6935701  | 0.508 | 0.56  | 1 | 21 |       |   |
| ATP5PF       | B | PLCG2      |       |       |   |    |       |   |
| 9.320365e-05 |   | 0.7157791  | 0.375 | 0.428 | 1 | 21 |       |   |
| MINOS1       | B | PLCG2      |       |       |   |    |       |   |
| 9.461079e-05 |   | 0.5487251  | 0.178 | 0.182 | 1 | 21 |       |   |
| RASGRP3      | B | PLCG2      |       |       |   |    |       |   |
| 9.461522e-05 |   | -0.7857552 | 0.071 | 0.149 | 1 | 21 |       |   |
| IGHA1        | B | PLCG2      |       |       |   |    |       |   |
| 9.698805e-05 |   | 0.742564   | 0.269 | 0.275 | 1 | 21 | ITGAE | B |
| PLCG2        |   |            |       |       |   |    |       |   |
| 0.0001083214 |   | 0.5330264  | 0.136 | 0.125 | 1 | 21 |       |   |
| AC025164.1   |   | B          | PLCG2 |       |   |    |       |   |
| 0.000109204  |   | 0.5136203  | 0.123 | 0.112 | 1 | 21 |       |   |
| BRI3BP       | B | PLCG2      |       |       |   |    |       |   |
| 0.000115263  |   | 0.4649409  | 0.112 | 0.119 | 1 | 21 |       |   |
| FMC1         | B | PLCG2      |       |       |   |    |       |   |
| 0.0001244367 |   | 0.5464547  | 0.154 | 0.158 | 1 | 21 |       |   |
| ANKRD49      | B | PLCG2      |       |       |   |    |       |   |
| 0.0001582468 |   | 0.5835238  | 0.173 | 0.182 | 1 | 21 |       |   |
| MED30        | B | PLCG2      |       |       |   |    |       |   |
| 0.0001623137 |   | 0.6969254  | 0.306 | 0.297 | 1 | 21 |       |   |
| GGA2         | B | PLCG2      |       |       |   |    |       |   |
| 0.0001689426 |   | 0.645537   | 0.472 | 0.53  | 1 | 21 | SRSF7 | B |
| PLCG2        |   |            |       |       |   |    |       |   |
| 0.0001968094 |   | 0.4351764  | 0.185 | 0.211 | 1 | 21 |       |   |
| GABPB1-AS1   |   | B          | PLCG2 |       |   |    |       |   |
| 0.0002561591 |   | 0.6821809  | 0.611 | 0.697 | 1 | 21 |       |   |
| ATP5MPL      | B | PLCG2      |       |       |   |    |       |   |
| 0.0002802167 |   | 0.5563618  | 0.13  | 0.126 | 1 | 21 |       |   |
| COMMD4       | B | PLCG2      |       |       |   |    |       |   |
| 0.0002877979 |   | 0.5537636  | 0.112 | 0.095 | 1 | 21 |       |   |
| RNGTT        | B | PLCG2      |       |       |   |    |       |   |
| 0.0002923774 |   | 0.6897912  | 0.278 | 0.312 | 1 | 21 |       |   |
| MZT2A        | B | PLCG2      |       |       |   |    |       |   |
| 0.0003529258 |   | 0.5436727  | 0.29  | 0.329 | 1 | 21 |       |   |
| HNRNPH1      | B | PLCG2      |       |       |   |    |       |   |
| 0.0004007597 |   | 0.4947631  | 0.109 | 0.101 | 1 | 21 |       |   |

|          |   |       |              |             |          |       |       |    |        |       |   |
|----------|---|-------|--------------|-------------|----------|-------|-------|----|--------|-------|---|
| BACH2    | B | PLCG2 | 0.0004039222 | 0.7007228   | 0.28     | 0.321 | 1     | 21 |        |       |   |
| AP3S1    | B | PLCG2 | 0.0004112966 | 0.7962527   | 0.2      | 0.168 | 1     | 21 |        |       |   |
| CCDC88A  | B | PLCG2 | 0.0004313115 | 0.6437601   | 0.261    | 0.281 | 1     | 21 |        |       |   |
| JPT1     | B | PLCG2 | 0.0004780221 | 0.5835341   | 0.335    | 0.383 | 1     | 21 |        |       |   |
| SRSF10   | B | PLCG2 | 0.00048107   | 0.6130962   | 0.309    | 0.346 | 1     | 21 |        |       |   |
| LSM6     | B | PLCG2 | 0.0005281253 | 0.3924742   | 0.33     | 0.397 | 1     | 21 |        |       |   |
| CSTB     | B | PLCG2 | 0.0005680171 | 0.4939534   | 0.155    | 0.152 | 1     | 21 |        |       |   |
| CD72     | B | PLCG2 | 0.0005695965 | 0.5421552   | 0.143    | 0.118 | 1     | 21 |        |       |   |
| CD38     | B | PLCG2 | 0.0005998663 | 0.7375624   | 0.615    | 0.708 | 1     | 21 |        |       |   |
| NDUFA4   | B | PLCG2 | 0.000663416  | 0.7028023   | 0.487    | 0.572 | 1     | 21 |        |       |   |
| SNRPE    | B | PLCG2 | 0.0006936912 | 0.4955489   | 0.114    | 0.112 | 1     | 21 |        |       |   |
| CKLF     | B | PLCG2 | 0.0008080735 | 0.539126    | 0.228    | 0.263 | 1     | 21 | ANP32E | B     |   |
|          |   | PLCG2 | 0.000846089  | 0.6147379   | 0.207    | 0.237 | 1     | 21 |        |       |   |
| ATP6V1E1 | B | PLCG2 | 0.0008577985 | 0.5992766   | 0.328    | 0.38  | 1     | 21 |        |       |   |
| ANAPC11  | B | PLCG2 | 0.0008695652 | 0.6507399   | 0.133    | 0.134 | 1     | 21 |        |       |   |
| PLEKHA2  | B | PLCG2 | 0.0009162    | 0.5431675   | 0.204    | 0.233 | 1     | 21 |        |       |   |
| CHCHD7   | B | PLCG2 | 0.0009270319 | 0.4780782   | 0.119    | 0.12  | 1     | 21 |        |       |   |
| CD180    | B | PLCG2 | 0.0009456746 | 0.7022013   | 0.449    | 0.519 | 1     | 21 |        |       |   |
| COX8A    | B | PLCG2 | 0.0009731904 | 0.3939719   | 0.121    | 0.123 | 1     | 21 |        |       |   |
| NUP62    | B | PLCG2 | 0.001004543  | 0.580914    | 0.126    | 0.116 | 1     | 21 | GMDS   | B     |   |
|          |   | PLCG2 | 0.001015238  | 0.6190047   | 0.295    | 0.31  | 1     | 21 |        |       |   |
| CALM3    | B | PLCG2 | 0.001035991  | 0.6209115   | 0.361    | 0.394 | 1     | 21 |        |       |   |
| SYPL1    | B | PLCG2 | 0.001076902  | 0.5375338   | 0.112    | 0.114 | 1     | 21 |        |       |   |
| PAX5     | B | PLCG2 | 0.001188719  | 0.6926707   | 0.399    | 0.478 | 1     | 21 |        | FUS   |   |
|          |   | B     | PLCG2        | 0.001216537 | 0.482017 | 0.686 | 0.655 | 1  | 21     | TCL1A | B |

|                  |           |       |       |       |    |        |   |     |
|------------------|-----------|-------|-------|-------|----|--------|---|-----|
| PLCG2            |           |       |       |       |    |        |   |     |
| 0.00139379       | 0.5560212 |       | 0.124 | 0.112 | 1  | 21     |   |     |
| CPNE5 B PLCG2    |           |       |       |       |    |        |   |     |
| 0.001505546      | 0.4095033 |       | 0.107 | 0.111 | 1  | 21     |   |     |
| ZNF644 B PLCG2   |           |       |       |       |    |        |   |     |
| 0.001559948      | 0.4382424 |       | 0.114 | 0.093 | 1  | 21     |   |     |
| CCNB1 B PLCG2    |           |       |       |       |    |        |   |     |
| 0.001691928      | 0.4183122 |       | 0.145 | 0.141 | 1  | 21     |   |     |
| SMC2 B PLCG2     |           |       |       |       |    |        |   |     |
| 0.001932743      | 0.3418604 |       | 0.396 | 0.556 | 1  | 21     |   |     |
| SEC61G B PLCG2   |           |       |       |       |    |        |   |     |
| 0.001985701      | 0.7222397 |       | 0.585 | 0.664 | 1  | 21     |   | DBI |
| B PLCG2          |           |       |       |       |    |        |   |     |
| 0.001993111      | 0.6070449 |       | 0.187 | 0.209 | 1  | 21     |   |     |
| MIS18BP1 B PLCG2 |           |       |       |       |    |        |   |     |
| 0.002061325      | 0.5463874 |       | 0.309 | 0.363 | 1  | 21     |   |     |
| ELOC B PLCG2     |           |       |       |       |    |        |   |     |
| 0.002602705      | 0.4196625 |       | 0.117 | 0.122 | 1  | 21     |   |     |
| NFATC2IP B PLCG2 |           |       |       |       |    |        |   |     |
| 0.002835775      | 0.4315816 |       | 0.131 | 0.142 | 1  | 21     |   |     |
| ANAPC15 B PLCG2  |           |       |       |       |    |        |   |     |
| 0.002957783      | 0.4409271 |       | 0.085 | 0.101 | 1  | 21     |   |     |
| SMG1 B PLCG2     |           |       |       |       |    |        |   |     |
| 0.002963109      | 0.6238155 |       | 0.261 | 0.237 | 1  | 21     |   |     |
| GCHFR B PLCG2    |           |       |       |       |    |        |   |     |
| 0.003008729      | 0.5612887 |       | 0.396 | 0.43  | 1  | 21     |   |     |
| IRF8 B PLCG2     |           |       |       |       |    |        |   |     |
| 0.003209103      | 0.4648463 |       | 0.164 | 0.187 | 1  | 21     |   |     |
| KIF20B B PLCG2   |           |       |       |       |    |        |   |     |
| 0.003876655      | 0.3559828 |       | 0.128 | 0.134 | 1  | 21     |   |     |
| NUP37 B PLCG2    |           |       |       |       |    |        |   |     |
| 0.003879406      | 0.3434584 |       | 0.459 | 0.626 | 1  | 21     |   |     |
| LAMTOR5 B PLCG2  |           |       |       |       |    |        |   |     |
| 0.004045405      | 0.3493897 |       | 0.1   | 0.099 | 1  | 21     |   |     |
| HERC4 B PLCG2    |           |       |       |       |    |        |   |     |
| 0.004258476      | 0.304016  | 0.466 | 0.624 | 1     | 21 | ARPC1B | B |     |
| PLCG2            |           |       |       |       |    |        |   |     |
| 0.004352917      | 0.380225  | 0.09  | 0.102 | 1     | 21 | BOLA3  | B |     |
| PLCG2            |           |       |       |       |    |        |   |     |
| 0.00459502       | 0.564971  | 0.15  | 0.182 | 1     | 21 | MCL1   | B |     |
| PLCG2            |           |       |       |       |    |        |   |     |
| 0.004962217      | 0.534379  | 0.373 | 0.424 | 1     | 21 | DEK    | B |     |
| PLCG2            |           |       |       |       |    |        |   |     |
| 0.005011071      | 0.5290662 |       | 0.109 | 0.101 | 1  | 21     |   |     |
| MYBL2 B PLCG2    |           |       |       |       |    |        |   |     |
| 0.005255716      | 0.5026131 |       | 0.285 | 0.318 | 1  | 21     |   |     |
| SMIM26 B PLCG2   |           |       |       |       |    |        |   |     |
| 0.005293589      | 0.3808697 |       | 0.478 | 0.65  | 1  | 21     |   |     |
| UQCR11 B PLCG2   |           |       |       |       |    |        |   |     |
| 0.005507312      | 0.4266464 |       | 0.104 | 0.117 | 1  | 21     |   |     |



|              |            |       |       |              |              |
|--------------|------------|-------|-------|--------------|--------------|
| 5.171741e-58 | 1.105418   | 0.313 | 0.122 | 9.220697e-54 | 22           |
| EIF2AK2      | Naive IFN1 |       |       |              |              |
| 3.940873e-57 | 1.063224   | 0.782 | 0.531 | 7.026183e-53 | 22           |
| ISG20        | Naive IFN1 |       |       |              |              |
| 4.028637e-54 | 0.8096357  |       | 0.156 | 0.018        | 7.182657e-50 |
| HERC5        | Naive IFN1 |       |       |              | 22           |
| 8.14949e-54  | 0.9132776  |       | 0.246 | 0.059        | 1.452973e-49 |
| EPSTI1       | Naive IFN1 |       |       |              | 22           |
| 5.476873e-49 | 0.8153478  |       | 0.884 | 0.749        | 9.764716e-45 |
| CXCR4        | Naive IFN1 |       |       |              | 22           |
| 1.082338e-48 | 0.4228712  |       | 0.998 | 0.905        | 1.9297e-44   |
| IGHM         | Naive IFN1 |       |       |              | 22           |
| 2.177115e-43 | -1.273808  |       | 0.03  | 0.208        | 3.881578e-39 |
| RGS13        | Naive IFN1 |       |       |              | 22           |
| 4.211431e-41 | -1.037121  |       | 0.311 | 0.602        | 7.50856e-37  |
| PRDX1        | Naive IFN1 |       |       |              | 22           |
| 1.00816e-40  | 0.6828208  |       | 0.132 | 0.019        | 1.797448e-36 |
| IFIT2        | Naive IFN1 |       |       |              | 22           |
| 1.310213e-40 | 0.8674279  |       | 0.747 | 0.618        | 2.335979e-36 |
| IFI16        | Naive IFN1 |       |       |              | 22           |
| 3.188297e-39 | -1.025611  |       | 0.77  | 0.889        | 5.684415e-35 |
| GAPDH        | Naive IFN1 |       |       |              | 22           |
| 5.792159e-38 | 0.4666514  |       | 0.996 | 0.985        | 1.032684e-33 |
| TMSB10       | Naive IFN1 |       |       |              | 22           |
| 8.224428e-38 | 0.7137199  |       | 0.192 | 0.054        | 1.466333e-33 |
| STAT1        | Naive IFN1 |       |       |              | 22           |
| 2.047997e-37 | 0.8773565  |       | 0.605 | 0.369        | 3.651375e-33 |
| SELL         | Naive IFN1 |       |       |              | 22           |
| 5.692421e-35 | 0.4774575  |       | 0.972 | 0.935        | 1.014902e-30 |
| BTG1         | Naive IFN1 |       |       |              | 22           |
| 5.119359e-34 | -0.7971572 |       | 0.529 | 0.764        | 9.127305e-30 |
| PKM          | Naive IFN1 |       |       |              | 22           |
| 3.741169e-33 | 0.803892   | 0.25  | 0.097 | 6.670131e-29 | 22           |
| TRIM22       | Naive IFN1 |       |       |              | 22           |
| 8.718748e-33 | 0.929475   | 0.457 | 0.283 | 1.554466e-28 | 22           |
| SP110        | Naive IFN1 |       |       |              | 22           |
| 6.307312e-32 | 0.5890658  |       | 0.772 | 0.604        | 1.124531e-27 |
| IGHD         | Naive IFN1 |       |       |              | 22           |
| 8.798184e-32 | -0.9107296 |       | 0.068 | 0.302        | 1.568628e-27 |
| NME1         | Naive IFN1 |       |       |              | 22           |
| 7.955764e-31 | -1.009945  |       | 0.499 | 0.718        | 1.418433e-26 |
| ENO1         | Naive IFN1 |       |       |              | 22           |
| 9.824076e-31 | 0.7741577  |       | 0.261 | 0.115        | 1.751534e-26 |
| SAMD9        | Naive IFN1 |       |       |              | 22           |
| 6.258012e-30 | 0.9051837  |       | 0.363 | 0.235        | 1.115741e-25 |
| UBE2L6       | Naive IFN1 |       |       |              | 22           |
| 7.917275e-29 | -1.068834  |       | 0.172 | 0.406        | 1.411571e-24 |
| FABP5        | Naive IFN1 |       |       |              | 22           |
| 4.227342e-28 | -0.6504569 |       | 0.152 | 0.396        | 7.536928e-24 |
| YWHAE        | Naive IFN1 |       |       |              | 22           |

|              |            |       |       |              |    |
|--------------|------------|-------|-------|--------------|----|
| 4.13626e-27  | -0.5628057 | 0.385 | 0.631 | 7.374539e-23 | 22 |
| ATP5F1B      | Naive IFN1 |       |       |              |    |
| 1.54077e-26  | -0.5446088 | 0.357 | 0.611 | 2.747039e-22 | 22 |
| POLR2L       | Naive IFN1 |       |       |              |    |
| 1.347952e-25 | -0.8214898 | 0.369 | 0.599 | 2.403264e-21 | 22 |
| LDHA         | Naive IFN1 |       |       |              |    |
| 5.812236e-25 | -0.6012986 | 0.782 | 0.901 | 1.036264e-20 | 22 |
| PFN1         | Naive IFN1 |       |       |              |    |
| 1.173194e-24 | -0.6344861 | 0.242 | 0.477 | 2.091687e-20 | 22 |
| SNRPD1       | Naive IFN1 |       |       |              |    |
| 2.319111e-24 | -0.7266311 | 0.02  | 0.153 | 4.134743e-20 | 22 |
| DUSP2        | Naive IFN1 |       |       |              |    |
| 3.960609e-24 | -0.5265304 | 0.218 | 0.451 | 7.06137e-20  | 22 |
| SEM1         | Naive IFN1 |       |       |              |    |
| 4.517879e-24 | -0.5662419 | 0.367 | 0.6   | 8.054926e-20 | 22 |
| SEC61B       | Naive IFN1 |       |       |              |    |
| 8.3831e-24   | -0.5546005 | 0.337 | 0.562 | 1.494623e-19 | 22 |
| ATP5PF       | Naive IFN1 |       |       |              |    |
| 9.309959e-24 | -0.6416944 | 0.076 | 0.236 | 1.659873e-19 | 22 |
| UBE2J1       | Naive IFN1 |       |       |              |    |
| 5.278989e-23 | -0.6216082 | 0.359 | 0.586 | 9.41191e-19  | 22 |
| ANP32B       | Naive IFN1 |       |       |              |    |
| 5.627347e-23 | -0.6524159 | 0.184 | 0.393 | 1.0033e-18   | 22 |
| EIF5A        | Naive IFN1 |       |       |              |    |
| 6.013502e-23 | -0.5849797 | 0.218 | 0.452 | 1.072147e-18 | 22 |
| ILF2         | Naive IFN1 |       |       |              |    |
| 6.015346e-23 | 0.4994519  | 0.918 | 0.847 | 1.072476e-18 | 22 |
| CD37         | Naive IFN1 |       |       |              |    |
| 6.129888e-23 | -0.621465  | 0.206 | 0.447 | 1.092898e-18 | 22 |
| C1QBP        | Naive IFN1 |       |       |              |    |
| 2.670985e-22 | 0.7066941  | 0.341 | 0.227 | 4.7621e-18   | 22 |
| NT5C3A       | Naive IFN1 |       |       |              |    |
| 4.767045e-22 | 0.4473124  | 0.954 | 0.867 | 8.499164e-18 | 22 |
| CD52         | Naive IFN1 |       |       |              |    |
| 9.740517e-22 | -0.6877651 | 0.545 | 0.738 | 1.736637e-17 | 22 |
| HSPA8        | Naive IFN1 |       |       |              |    |
| 1.199726e-21 | -0.5911499 | 0.222 | 0.442 | 2.138992e-17 | 22 |
| HMGA1        | Naive IFN1 |       |       |              |    |
| 1.411472e-21 | -0.6231224 | 0.16  | 0.387 | 2.516513e-17 | 22 |
| NHP2         | Naive IFN1 |       |       |              |    |
| 1.863409e-21 | 0.7093877  | 0.417 | 0.284 | 3.322272e-17 | 22 |
| PPM1K        | Naive IFN1 |       |       |              |    |
| 1.882186e-21 | 0.6656814  | 0.238 | 0.121 | 3.35575e-17  | 22 |
| RNF213       | Naive IFN1 |       |       |              |    |
| 3.408551e-21 | -0.7489234 | 0.054 | 0.192 | 6.077106e-17 | 22 |
| PTTG1        | Naive IFN1 |       |       |              |    |
| 4.463311e-21 | -0.6255306 | 0.876 | 0.943 | 7.957638e-17 | 22 |
| YBX1         | Naive IFN1 |       |       |              |    |
| 7.528956e-21 | -0.6413857 | 0.138 | 0.305 | 1.342338e-16 | 22 |
| CD27         | Naive IFN1 |       |       |              |    |



|              |            |       |       |              |    |
|--------------|------------|-------|-------|--------------|----|
| 2.600988e-20 | -0.514779  | 0.379 | 0.582 | 4.637301e-16 | 22 |
| LDHB         | Naive IFN1 |       |       |              |    |
| 2.866089e-20 | -0.6797827 | 0.337 | 0.561 | 5.10995e-16  | 22 |
| NCL          | Naive IFN1 |       |       |              |    |
| 2.979752e-20 | -0.5180606 | 0.345 | 0.557 | 5.3126e-16   | 22 |
| SEC61G       | Naive IFN1 |       |       |              |    |
| 3.080128e-20 | -0.5493829 | 0.569 | 0.75  | 5.49156e-16  | 22 |
| HSP90AA1     | Naive IFN1 |       |       |              |    |
| 3.589009e-20 | -0.470954  | 0.381 | 0.587 | 6.398844e-16 | 22 |
| ATP5MC3      | Naive IFN1 |       |       |              |    |
| 4.560769e-20 | -0.4773425 | 0.327 | 0.537 | 8.131395e-16 | 22 |
| SRSF9        | Naive IFN1 |       |       |              |    |
| 4.626496e-20 | -0.5140399 | 0.375 | 0.608 | 8.248579e-16 | 22 |
| RBM3         | Naive IFN1 |       |       |              |    |
| 7.162113e-20 | -0.8265789 | 0.19  | 0.411 | 1.276933e-15 | 22 |
| TXN          | Naive IFN1 |       |       |              |    |
| 1.122776e-19 | -0.5118795 | 0.485 | 0.682 | 2.001798e-15 | 22 |
| SRSF3        | Naive IFN1 |       |       |              |    |
| 2.086072e-19 | -0.459921  | 0.433 | 0.636 | 3.719257e-15 | 22 |
| PSMA4        | Naive IFN1 |       |       |              |    |
| 2.356345e-19 | -0.3294634 | 0.01  | 0.104 | 4.201128e-15 | 22 |
| SEMA4A       | Naive IFN1 |       |       |              |    |
| 3.443647e-19 | -0.5564447 | 0.064 | 0.236 | 6.139679e-15 | 22 |
| MTHFD2       | Naive IFN1 |       |       |              |    |
| 6.427786e-19 | -0.4804254 | 0.144 | 0.351 | 1.14601e-14  | 22 |
| TIMM13       | Naive IFN1 |       |       |              |    |
| 6.545388e-19 | -0.6522796 | 0.589 | 0.75  | 1.166977e-14 | 22 |
| RAN          | Naive IFN1 |       |       |              |    |
| 7.231775e-19 | -0.4568468 | 0.064 | 0.22  | 1.289353e-14 | 22 |
| NANS         | Naive IFN1 |       |       |              |    |
| 7.235672e-19 | -0.5099889 | 0.427 | 0.643 | 1.290048e-14 | 22 |
| HNRNPM       | Naive IFN1 |       |       |              |    |
| 8.623153e-19 | -0.5955995 | 0.607 | 0.77  | 1.537422e-14 | 22 |
| HMG1         | Naive IFN1 |       |       |              |    |
| 9.149868e-19 | -0.816674  | 0.393 | 0.579 | 1.63133e-14  | 22 |
| TUBB         | Naive IFN1 |       |       |              |    |
| 1.203871e-18 | -0.6119903 | 0.289 | 0.5   | 2.146381e-14 | 22 |
| HSPE1        | Naive IFN1 |       |       |              |    |
| 1.458733e-18 | -0.3566128 | 0.527 | 0.725 | 2.600776e-14 | 22 |
| COX6C        | Naive IFN1 |       |       |              |    |
| 1.533557e-18 | -0.5180298 | 0.347 | 0.555 | 2.734179e-14 | 22 |
| TCEA1        | Naive IFN1 |       |       |              |    |
| 1.629248e-18 | -0.5097597 | 0.513 | 0.705 | 2.904786e-14 | 22 |
| TPI1         | Naive IFN1 |       |       |              |    |
| 1.665651e-18 | -0.4511947 | 0.136 | 0.325 | 2.969689e-14 | 22 |
| IMP4         | Naive IFN1 |       |       |              |    |
| 1.938982e-18 | 0.6181359  | 0.194 | 0.102 | 3.457011e-14 | 22 |
| IFI35        | Naive IFN1 |       |       |              |    |
| 2.065711e-18 | -0.5279468 | 0.062 | 0.192 | 3.682956e-14 | 22 |
| DAAM1        | Naive IFN1 |       |       |              |    |

|              |            |       |       |              |    |
|--------------|------------|-------|-------|--------------|----|
| 3.759744e-18 | -0.7548006 | 0.655 | 0.787 | 6.703247e-14 | 22 |
| ACTG1        | Naive IFN1 |       |       |              |    |
| 3.876515e-18 | -0.5026418 | 0.222 | 0.445 | 6.911439e-14 | 22 |
| CCT6A        | Naive IFN1 |       |       |              |    |
| 4.102694e-18 | -0.8979608 | 0.503 | 0.668 | 7.314693e-14 | 22 |
| TUBA1B       | Naive IFN1 |       |       |              |    |
| 4.991602e-18 | -0.3980755 | 0.359 | 0.575 | 8.899527e-14 | 22 |
| PARK7        | Naive IFN1 |       |       |              |    |
| 5.522735e-18 | -0.4808464 | 0.228 | 0.444 | 9.846484e-14 | 22 |
| PPA1         | Naive IFN1 |       |       |              |    |
| 7.409382e-18 | -0.3047861 | 0.934 | 0.977 | 1.321019e-13 | 22 |
| RPS24        | Naive IFN1 |       |       |              |    |
| 9.159786e-18 | -0.4364873 | 0.19  | 0.397 | 1.633098e-13 | 22 |
| NDUFAB1      | Naive IFN1 |       |       |              |    |
| 1.016535e-17 | -0.5153407 | 0.19  | 0.391 | 1.812381e-13 | 22 |
| CCT5         | Naive IFN1 |       |       |              |    |
| 1.207665e-17 | -0.3975212 | 0.433 | 0.642 | 2.153145e-13 | 22 |
| ERH          | Naive IFN1 |       |       |              |    |
| 1.886077e-17 | -0.4640987 | 0.415 | 0.61  | 3.362688e-13 | 22 |
| POMP         | Naive IFN1 |       |       |              |    |
| 1.969212e-17 | -0.460718  | 0.345 | 0.578 | 3.510907e-13 | 22 |
| APRT         | Naive IFN1 |       |       |              |    |
| 2.48108e-17  | -0.3930504 | 0.497 | 0.687 | 4.423518e-13 | 22 |
| COX6A1       | Naive IFN1 |       |       |              |    |
| 2.883871e-17 | -0.4089546 | 0.766 | 0.871 | 5.141654e-13 | 22 |
| ARPC2        | Naive IFN1 |       |       |              |    |
| 3.017459e-17 | -0.4183241 | 0.222 | 0.422 | 5.379827e-13 | 22 |
| HNRNPD       | Naive IFN1 |       |       |              |    |
| 3.487305e-17 | -0.5961891 | 0.162 | 0.355 | 6.217516e-13 | 22 |
| TUBB4B       | Naive IFN1 |       |       |              |    |
| 3.546348e-17 | -0.4404175 | 0.353 | 0.567 | 6.322784e-13 | 22 |
| SNRPB        | Naive IFN1 |       |       |              |    |
| 4.005905e-17 | -0.3181546 | 0.014 | 0.102 | 7.142127e-13 | 22 |
| MYBL2        | Naive IFN1 |       |       |              |    |
| 4.436734e-17 | -0.4051946 | 0.517 | 0.702 | 7.910252e-13 | 22 |
| ELOB         | Naive IFN1 |       |       |              |    |
| 7.360654e-17 | -0.4358859 | 0.206 | 0.419 | 1.312331e-12 | 22 |
| DDX39A       | Naive IFN1 |       |       |              |    |
| 7.417529e-17 | 0.6637627  | 0.357 | 0.21  | 1.322471e-12 | 22 |
| PLAC8        | Naive IFN1 |       |       |              |    |
| 7.937113e-17 | 0.6125769  | 0.555 | 0.466 | 1.415108e-12 | 22 |
| ITM2B        | Naive IFN1 |       |       |              |    |
| 7.963631e-17 | -0.5039432 | 0.042 | 0.15  | 1.419836e-12 | 22 |
| BIK          | Naive IFN1 |       |       |              |    |
| 8.428573e-17 | -0.4658546 | 0.068 | 0.235 | 1.50273e-12  | 22 |
| CDK4         | Naive IFN1 |       |       |              |    |
| 9.275869e-17 | -0.3793566 | 0.371 | 0.586 | 1.653795e-12 | 22 |
| NDUFB2       | Naive IFN1 |       |       |              |    |
| 1.040513e-16 | -0.5722698 | 0.11  | 0.282 | 1.85513e-12  | 22 |
| SRM          | Naive IFN1 |       |       |              |    |

|              |            |       |       |              |    |
|--------------|------------|-------|-------|--------------|----|
| 1.081322e-16 | -0.4723388 | 0.609 | 0.761 | 1.927889e-12 | 22 |
| PSMA7        | Naive IFN1 |       |       |              |    |
| 1.311477e-16 | -0.4502881 | 0.226 | 0.433 | 2.338232e-12 | 22 |
| SLIRP        | Naive IFN1 |       |       |              |    |
| 1.439073e-16 | -0.3873723 | 0.447 | 0.643 | 2.565723e-12 | 22 |
| ATP5MF       | Naive IFN1 |       |       |              |    |
| 1.501359e-16 | -0.4370694 | 0.104 | 0.284 | 2.676772e-12 | 22 |
| PSMD14       | Naive IFN1 |       |       |              |    |
| 1.840769e-16 | -0.4067698 | 0.062 | 0.219 | 3.281908e-12 | 22 |
| MRPL12       | Naive IFN1 |       |       |              |    |
| 2.016779e-16 | -0.795438  | 0.749 | 0.849 | 3.595715e-12 | 22 |
| HSP90AB1     | Naive IFN1 |       |       |              |    |
| 2.24277e-16  | -0.5174205 | 0.18  | 0.35  | 3.998635e-12 | 22 |
| S100A10      | Naive IFN1 |       |       |              |    |
| 2.353184e-16 | -0.4269675 | 0.443 | 0.641 | 4.195492e-12 | 22 |
| ATP5MD       | Naive IFN1 |       |       |              |    |
| 2.39978e-16  | -0.5819933 | 0.287 | 0.487 | 4.278568e-12 | 22 |
| RANBP1       | Naive IFN1 |       |       |              |    |
| 2.52826e-16  | 0.4975427  | 0.174 | 0.091 | 4.507635e-12 | 22 |
| PARP9        | Naive IFN1 |       |       |              |    |
| 3.087272e-16 | -0.460476  | 0.224 | 0.4   | 5.504297e-12 | 22 |
| BASP1        | Naive IFN1 |       |       |              |    |
| 3.689889e-16 | -0.4263105 | 0.05  | 0.2   | 6.578703e-12 | 22 |
| EBNA1BP2     | Naive IFN1 |       |       |              |    |
| 3.723591e-16 | -0.4373613 | 0.112 | 0.283 | 6.63879e-12  | 22 |
| JPT1         | Naive IFN1 |       |       |              |    |
| 4.066925e-16 | -0.4621211 | 0.218 | 0.43  | 7.250921e-12 | 22 |
| CCT4         | Naive IFN1 |       |       |              |    |
| 4.720657e-16 | -0.3879677 | 0.429 | 0.634 | 8.41646e-12  | 22 |
| COX7B        | Naive IFN1 |       |       |              |    |
| 5.239929e-16 | -0.5987013 | 0.864 | 0.93  | 9.34227e-12  | 22 |
| NPM1         | Naive IFN1 |       |       |              |    |
| 5.46628e-16  | -0.4458197 | 0.449 | 0.634 | 9.745831e-12 | 22 |
| GSTP1        | Naive IFN1 |       |       |              |    |
| 7.033158e-16 | -0.3253961 | 0.435 | 0.638 | 1.253942e-11 | 22 |
| UQCRH        | Naive IFN1 |       |       |              |    |
| 8.172745e-16 | -0.4177471 | 0.842 | 0.928 | 1.457119e-11 | 22 |
| HNRNPA1      | Naive IFN1 |       |       |              |    |
| 9.061249e-16 | -0.4227924 | 0.174 | 0.376 | 1.61553e-11  | 22 |
| PSMC3        | Naive IFN1 |       |       |              |    |
| 1.059595e-15 | 0.4950572  | 0.617 | 0.511 | 1.889151e-11 | 22 |
| BANK1        | Naive IFN1 |       |       |              |    |
| 1.082267e-15 | 0.3485095  | 0.974 | 0.969 | 1.929573e-11 | 22 |
| MT-ND3       | Naive IFN1 |       |       |              |    |
| 1.088554e-15 | -0.5834381 | 0.267 | 0.463 | 1.940782e-11 | 22 |
| HSPD1        | Naive IFN1 |       |       |              |    |
| 1.123516e-15 | -0.4084526 | 0.026 | 0.132 | 2.003116e-11 | 22 |
| PHGDH        | Naive IFN1 |       |       |              |    |
| 1.21374e-15  | -0.3697451 | 0.309 | 0.521 | 2.163977e-11 | 22 |
| PSMB6        | Naive IFN1 |       |       |              |    |

|              |            |       |       |              |    |
|--------------|------------|-------|-------|--------------|----|
| 1.334144e-15 | -0.5240951 | 0.124 | 0.305 | 2.378645e-11 | 22 |
| ODC1         | Naive IFN1 |       |       |              |    |
| 1.387474e-15 | -0.4230709 | 0.12  | 0.285 | 2.473728e-11 | 22 |
| PRDX3        | Naive IFN1 |       |       |              |    |
| 1.726927e-15 | -0.5376109 | 0.086 | 0.232 | 3.078938e-11 | 22 |
| CKS2         | Naive IFN1 |       |       |              |    |
| 1.792999e-15 | -0.3941024 | 0.489 | 0.68  | 3.196738e-11 | 22 |
| HNRNPA3      | Naive IFN1 |       |       |              |    |
| 2.27116e-15  | -0.4540541 | 0.253 | 0.466 | 4.049251e-11 | 22 |
| PRMT1        | Naive IFN1 |       |       |              |    |
| 2.29696e-15  | -0.4409796 | 0.022 | 0.133 | 4.095249e-11 | 22 |
| CYT0R        | Naive IFN1 |       |       |              |    |
| 2.671555e-15 | -0.4001512 | 0.281 | 0.492 | 4.763115e-11 | 22 |
| CCT3         | Naive IFN1 |       |       |              |    |
| 2.992397e-15 | -0.4496104 | 0.212 | 0.403 | 5.335145e-11 | 22 |
| RPL22L1      | Naive IFN1 |       |       |              |    |
| 3.203002e-15 | -0.4165551 | 0.369 | 0.574 | 5.710632e-11 | 22 |
| SNRPE        | Naive IFN1 |       |       |              |    |
| 3.367191e-15 | -0.385035  | 0.415 | 0.607 | 6.003365e-11 | 22 |
| PSMB3        | Naive IFN1 |       |       |              |    |
| 3.834642e-15 | -0.387848  | 0.17  | 0.333 | 6.836783e-11 | 22 |
| GRHPR        | Naive IFN1 |       |       |              |    |
| 3.991171e-15 | -0.4239542 | 0.184 | 0.377 | 7.115859e-11 | 22 |
| PSMC1        | Naive IFN1 |       |       |              |    |
| 4.227403e-15 | -0.3463822 | 0.499 | 0.685 | 7.537037e-11 | 22 |
| SLC25A3      | Naive IFN1 |       |       |              |    |
| 4.391083e-15 | -0.409202  | 0.094 | 0.262 | 7.828862e-11 | 22 |
| AK6          | Naive IFN1 |       |       |              |    |
| 4.613782e-15 | -0.3611465 | 0.297 | 0.505 | 8.225912e-11 | 22 |
| NDUFA11      | Naive IFN1 |       |       |              |    |
| 4.733073e-15 | -0.3428263 | 0.325 | 0.526 | 8.438595e-11 | 22 |
| FKBP1A       | Naive IFN1 |       |       |              |    |
| 5.032971e-15 | -0.4010917 | 0.094 | 0.264 | 8.973284e-11 | 22 |
| ANP32E       | Naive IFN1 |       |       |              |    |
| 5.140947e-15 | -0.5585698 | 0.178 | 0.342 | 9.165794e-11 | 22 |
| LRMP         | Naive IFN1 |       |       |              |    |
| 5.641128e-15 | -0.4906461 | 0.255 | 0.439 | 1.005757e-10 | 22 |
| COTL1        | Naive IFN1 |       |       |              |    |
| 6.576388e-15 | -0.3763646 | 0.545 | 0.709 | 1.172504e-10 | 22 |
| NDUFA4       | Naive IFN1 |       |       |              |    |
| 6.964194e-15 | -0.3887466 | 0.084 | 0.235 | 1.241646e-10 | 22 |
| CHCHD10      | Naive IFN1 |       |       |              |    |
| 7.194661e-15 | -0.4094949 | 0.359 | 0.542 | 1.282736e-10 | 22 |
| PARP1        | Naive IFN1 |       |       |              |    |
| 7.616437e-15 | -0.3601648 | 0.373 | 0.569 | 1.357935e-10 | 22 |
| UOCRQ        | Naive IFN1 |       |       |              |    |
| 7.649115e-15 | -0.3912893 | 0.014 | 0.116 | 1.363761e-10 | 22 |
| PYCR1        | Naive IFN1 |       |       |              |    |
| 9.305079e-15 | -0.3528835 | 0.038 | 0.135 | 1.659003e-10 | 22 |
| NEIL1        | Naive IFN1 |       |       |              |    |

|              |                |       |              |              |    |
|--------------|----------------|-------|--------------|--------------|----|
| 9.522918e-15 | -0.3602733     | 0.246 | 0.459        | 1.697841e-10 | 22 |
| SFPQ         | Naive IFN1     |       |              |              |    |
| 1.087014e-14 | -0.3214239     | 0.112 | 0.273        | 1.938037e-10 | 22 |
| TXNL4A       | Naive IFN1     |       |              |              |    |
| 1.125625e-14 | 0.614954 0.377 | 0.277 | 2.006876e-10 | 22           |    |
| IFITM2       | Naive IFN1     |       |              |              |    |
| 1.206796e-14 | -0.354651      | 0.351 | 0.559        | 2.151596e-10 | 22 |
| PGK1         | Naive IFN1     |       |              |              |    |
| 1.394432e-14 | -0.3741325     | 0.056 | 0.205        | 2.486132e-10 | 22 |
| MRPL23       | Naive IFN1     |       |              |              |    |
| 1.498686e-14 | -0.3409917     | 0.226 | 0.436        | 2.672008e-10 | 22 |
| NDUFB7       | Naive IFN1     |       |              |              |    |
| 1.531045e-14 | -1.05901 0.128 | 0.288 | 2.7297e-10   | 22           |    |
| MIR155HG     | Naive IFN1     |       |              |              |    |
| 1.685284e-14 | -0.3540697     | 0.034 | 0.156        | 3.004693e-10 | 22 |
| PAICS        | Naive IFN1     |       |              |              |    |
| 1.74366e-14  | -0.4040761     | 0.17  | 0.351        | 3.108771e-10 | 22 |
| PDIA6        | Naive IFN1     |       |              |              |    |
| 1.794652e-14 | -0.3738885     | 0.1   | 0.254        | 3.199686e-10 | 22 |
| RGS10        | Naive IFN1     |       |              |              |    |
| 2.211036e-14 | -0.3545396     | 0.8   | 0.896        | 3.942055e-10 | 22 |
| PPIA         | Naive IFN1     |       |              |              |    |
| 2.279983e-14 | -0.4551456     | 0.024 | 0.11         | 4.064981e-10 | 22 |
| VPREB3       | Naive IFN1     |       |              |              |    |
| 2.284326e-14 | -0.3062862     | 0.086 | 0.228        | 4.072726e-10 | 22 |
| UBE2G1       | Naive IFN1     |       |              |              |    |
| 2.318039e-14 | -0.3597021     | 0.07  | 0.226        | 4.132831e-10 | 22 |
| DAZAP1       | Naive IFN1     |       |              |              |    |
| 2.445357e-14 | 0.5216752      | 0.25  | 0.17         | 4.359828e-10 | 22 |
| PARP14       | Naive IFN1     |       |              |              |    |
| 2.792736e-14 | -0.4655595     | 0.144 | 0.31         | 4.979169e-10 | 22 |
| CALR         | Naive IFN1     |       |              |              |    |
| 3.011758e-14 | 0.4967426      | 0.112 | 0.045        | 5.369663e-10 | 22 |
| IRF9         | Naive IFN1     |       |              |              |    |
| 4.077433e-14 | -1.147362      | 0.072 | 0.177        | 7.269656e-10 | 22 |
| MZB1         | Naive IFN1     |       |              |              |    |
| 4.233275e-14 | -0.4185431     | 0.246 | 0.446        | 7.547505e-10 | 22 |
| ATP5MC1      | Naive IFN1     |       |              |              |    |
| 5.265887e-14 | -0.6099858     | 0.044 | 0.173        | 9.388549e-10 | 22 |
| TNFRSF18     | Naive IFN1     |       |              |              |    |
| 5.300279e-14 | -0.3940766     | 0.076 | 0.23         | 9.449867e-10 | 22 |
| MRPL3        | Naive IFN1     |       |              |              |    |
| 5.362225e-14 | -0.3553265     | 0.269 | 0.458        | 9.560311e-10 | 22 |
| COX17        | Naive IFN1     |       |              |              |    |
| 5.410859e-14 | -0.4188615     | 0.12  | 0.298        | 9.647021e-10 | 22 |
| PDCD5        | Naive IFN1     |       |              |              |    |
| 5.565484e-14 | -0.3566212     | 0.327 | 0.509        | 9.922701e-10 | 22 |
| MZT2B        | Naive IFN1     |       |              |              |    |
| 6.053766e-14 | -0.3598426     | 0.269 | 0.454        | 1.079326e-09 | 22 |
| MRPL51       | Naive IFN1     |       |              |              |    |

|              |            |       |       |              |    |
|--------------|------------|-------|-------|--------------|----|
| 6.475555e-14 | -0.4443869 | 0.152 | 0.34  | 1.154527e-09 | 22 |
| MIF          | Naive IFN1 |       |       |              |    |
| 6.603132e-14 | -0.4160622 | 0.188 | 0.377 | 1.177272e-09 | 22 |
| LCP1         | Naive IFN1 |       |       |              |    |
| 6.970157e-14 | 0.4826902  | 0.681 | 0.618 | 1.242709e-09 | 22 |
| CLEC2D       | Naive IFN1 |       |       |              |    |
| 7.598495e-14 | -0.4436441 | 0.214 | 0.394 | 1.354736e-09 | 22 |
| FNBP1        | Naive IFN1 |       |       |              |    |
| 9.581714e-14 | -0.4042583 | 0.082 | 0.221 | 1.708324e-09 | 22 |
| TRAF4        | Naive IFN1 |       |       |              |    |
| 1.006248e-13 | -0.3402406 | 0.465 | 0.648 | 1.79404e-09  | 22 |
| SNRPG        | Naive IFN1 |       |       |              |    |
| 1.014566e-13 | -0.3707499 | 0.172 | 0.331 | 1.80887e-09  | 22 |
| RFTN1        | Naive IFN1 |       |       |              |    |
| 1.022109e-13 | -0.3479435 | 0.431 | 0.62  | 1.822317e-09 | 22 |
| NDUFA13      | Naive IFN1 |       |       |              |    |
| 1.104315e-13 | -0.3725217 | 0.122 | 0.275 | 1.968884e-09 | 22 |
| POU2AF1      | Naive IFN1 |       |       |              |    |
| 1.175803e-13 | -0.3576413 | 0.05  | 0.166 | 2.09634e-09  | 22 |
| DEF8         | Naive IFN1 |       |       |              |    |
| 1.211747e-13 | -0.3199142 | 0.028 | 0.119 | 2.160424e-09 | 22 |
| CD38         | Naive IFN1 |       |       |              |    |
| 1.222704e-13 | -0.4598817 | 0.447 | 0.637 | 2.17996e-09  | 22 |
| HERPUD1      | Naive IFN1 |       |       |              |    |
| 1.288598e-13 | 0.5288996  | 0.559 | 0.493 | 2.297441e-09 | 22 |
| SP100        | Naive IFN1 |       |       |              |    |
| 1.354314e-13 | -0.4799223 | 0.246 | 0.425 | 2.414606e-09 | 22 |
| DEK          | Naive IFN1 |       |       |              |    |
| 1.528307e-13 | -0.4195843 | 0.13  | 0.304 | 2.724818e-09 | 22 |
| ATP1B3       | Naive IFN1 |       |       |              |    |
| 1.612082e-13 | -0.406832  | 0.174 | 0.366 | 2.87418e-09  | 22 |
| EIF3J        | Naive IFN1 |       |       |              |    |
| 1.695469e-13 | -0.3880352 | 0.75  | 0.852 | 3.022852e-09 | 22 |
| ATP5MG       | Naive IFN1 |       |       |              |    |
| 1.843852e-13 | -0.4039018 | 0.064 | 0.203 | 3.287403e-09 | 22 |
| TOMM40       | Naive IFN1 |       |       |              |    |
| 2.054284e-13 | 0.5588523  | 0.244 | 0.166 | 3.662583e-09 | 22 |
| ADAR         | Naive IFN1 |       |       |              |    |
| 2.223407e-13 | -0.3588414 | 0.076 | 0.212 | 3.964112e-09 | 22 |
| CLPP         | Naive IFN1 |       |       |              |    |
| 2.483623e-13 | -0.321293  | 0.407 | 0.603 | 4.428052e-09 | 22 |
| PSMA2        | Naive IFN1 |       |       |              |    |
| 2.48742e-13  | -0.3139632 | 0.323 | 0.525 | 4.434822e-09 | 22 |
| NDUFB8       | Naive IFN1 |       |       |              |    |
| 2.52345e-13  | -0.3380504 | 0.086 | 0.242 | 4.49906e-09  | 22 |
| SRSF1        | Naive IFN1 |       |       |              |    |
| 3.394105e-13 | -0.4216141 | 0.134 | 0.295 | 6.051351e-09 | 22 |
| SSRP1        | Naive IFN1 |       |       |              |    |
| 3.39499e-13  | -0.3384841 | 0.142 | 0.318 | 6.052927e-09 | 22 |
| NDUFAF3      | Naive IFN1 |       |       |              |    |

|              |            |       |       |              |    |
|--------------|------------|-------|-------|--------------|----|
| 3.495319e-13 | -0.3197115 | 0.144 | 0.308 | 6.231805e-09 | 22 |
| TIMM8B       | Naive IFN1 |       |       |              |    |
| 3.905919e-13 | -0.327434  | 0.062 | 0.189 | 6.963864e-09 | 22 |
| PRPSAP2      | Naive IFN1 |       |       |              |    |
| 4.197298e-13 | -0.4731127 | 0.463 | 0.639 | 7.483362e-09 | 22 |
| SET          | Naive IFN1 |       |       |              |    |
| 4.775943e-13 | -0.5142202 | 0.429 | 0.59  | 8.515029e-09 | 22 |
| MARCKSL1     | Naive IFN1 |       |       |              |    |
| 4.941063e-13 | -0.3587372 | 0.082 | 0.223 | 8.809421e-09 | 22 |
| MRPL4        | Naive IFN1 |       |       |              |    |
| 5.197126e-13 | -0.4104739 | 0.122 | 0.273 | 9.265956e-09 | 22 |
| SMS          | Naive IFN1 |       |       |              |    |
| 6.09122e-13  | -0.7748523 | 0.585 | 0.717 | 1.086004e-08 | 22 |
| HMG2         | Naive IFN1 |       |       |              |    |
| 6.869948e-13 | -0.387626  | 0.323 | 0.516 | 1.224843e-08 | 22 |
| SSBP1        | Naive IFN1 |       |       |              |    |
| 7.045093e-13 | -0.3405286 | 0.036 | 0.141 | 1.25607e-08  | 22 |
| AIM2         | Naive IFN1 |       |       |              |    |
| 8.26525e-13  | -0.4173355 | 0.064 | 0.203 | 1.473611e-08 | 22 |
| NPM3         | Naive IFN1 |       |       |              |    |
| 8.916455e-13 | -0.4513058 | 0.261 | 0.446 | 1.589715e-08 | 22 |
| ANXA2        | Naive IFN1 |       |       |              |    |
| 8.957429e-13 | -2.979395  | 0.291 | 0.452 | 1.59702e-08  | 22 |
| IGHG3        | Naive IFN1 |       |       |              |    |
| 1.02159e-12  | -0.3716417 | 0.03  | 0.119 | 1.821393e-08 | 22 |
| UBE2S        | Naive IFN1 |       |       |              |    |
| 1.069146e-12 | -0.3360833 | 0.852 | 0.92  | 1.90618e-08  | 22 |
| CFL1         | Naive IFN1 |       |       |              |    |
| 1.096207e-12 | -0.3718037 | 0.142 | 0.309 | 1.954427e-08 | 22 |
| FERMT3       | Naive IFN1 |       |       |              |    |
| 1.187482e-12 | -0.4010553 | 0.04  | 0.158 | 2.117162e-08 | 22 |
| NOLC1        | Naive IFN1 |       |       |              |    |
| 1.510642e-12 | -1.27443   | 0.192 | 0.304 | 2.693324e-08 | 22 |
| HMGB2        | Naive IFN1 |       |       |              |    |
| 1.527836e-12 | -0.4490137 | 0.102 | 0.244 | 2.723979e-08 | 22 |
| KPNA2        | Naive IFN1 |       |       |              |    |
| 1.588726e-12 | -0.8149134 | 0.07  | 0.183 | 2.83254e-08  | 22 |
| XBP1         | Naive IFN1 |       |       |              |    |
| 1.617504e-12 | -0.3522986 | 0.052 | 0.184 | 2.883847e-08 | 22 |
| TUBA1C       | Naive IFN1 |       |       |              |    |
| 1.729661e-12 | -0.4392636 | 0.463 | 0.606 | 3.083812e-08 | 22 |
| DYNLL1       | Naive IFN1 |       |       |              |    |
| 1.801496e-12 | -0.3153556 | 0.497 | 0.661 | 3.211886e-08 | 22 |
| UBL5         | Naive IFN1 |       |       |              |    |
| 1.844022e-12 | -0.3695897 | 0.14  | 0.305 | 3.287706e-08 | 22 |
| GLRX3        | Naive IFN1 |       |       |              |    |
| 1.908632e-12 | -0.3322194 | 0.261 | 0.437 | 3.402899e-08 | 22 |
| ROM01        | Naive IFN1 |       |       |              |    |
| 2.10916e-12  | -1.21423   | 0.287 | 0.424 | 3.760421e-08 | 22 |
| HIST1H4C     | Naive IFN1 |       |       |              |    |

|              |            |       |       |              |    |
|--------------|------------|-------|-------|--------------|----|
| 2.252974e-12 | -0.3163066 | 0.489 | 0.68  | 4.016828e-08 | 22 |
| MORF4L1      | Naive IFN1 |       |       |              |    |
| 2.255835e-12 | -0.3834634 | 0.501 | 0.659 | 4.021927e-08 | 22 |
| SLC25A5      | Naive IFN1 |       |       |              |    |
| 2.411489e-12 | -0.3087777 | 0.032 | 0.117 | 4.299443e-08 | 22 |
| GMDS         | Naive IFN1 |       |       |              |    |
| 2.526391e-12 | -0.3719733 | 0.208 | 0.395 | 4.504302e-08 | 22 |
| PHB          | Naive IFN1 |       |       |              |    |
| 2.547966e-12 | -0.3754578 | 0.116 | 0.276 | 4.542769e-08 | 22 |
| NDUFAF8      | Naive IFN1 |       |       |              |    |
| 2.622553e-12 | -0.3319475 | 0.024 | 0.127 | 4.675749e-08 | 22 |
| SLC1A5       | Naive IFN1 |       |       |              |    |
| 2.72306e-12  | 0.5255356  | 0.363 | 0.251 | 4.854943e-08 | 22 |
| FCMR         | Naive IFN1 |       |       |              |    |
| 2.804394e-12 | -0.3735183 | 0.066 | 0.17  | 4.999954e-08 | 22 |
| SMC4         | Naive IFN1 |       |       |              |    |
| 2.854217e-12 | -0.3314363 | 0.216 | 0.401 | 5.088784e-08 | 22 |
| PSMA3        | Naive IFN1 |       |       |              |    |
| 3.220879e-12 | -0.317176  | 0.062 | 0.162 | 5.742505e-08 | 22 |
| SUSD3        | Naive IFN1 |       |       |              |    |
| 3.503782e-12 | -0.3171147 | 0.12  | 0.278 | 6.246892e-08 | 22 |
| ATOX1        | Naive IFN1 |       |       |              |    |
| 3.51634e-12  | -0.3006601 | 0.251 | 0.442 | 6.269283e-08 | 22 |
| AURKAIP1     | Naive IFN1 |       |       |              |    |
| 3.516909e-12 | -0.3175151 | 0.106 | 0.25  | 6.270298e-08 | 22 |
| MRPL13       | Naive IFN1 |       |       |              |    |
| 3.61428e-12  | -0.3429352 | 0.194 | 0.369 | 6.443899e-08 | 22 |
| EWSR1        | Naive IFN1 |       |       |              |    |
| 3.681344e-12 | -0.6025265 | 0.044 | 0.16  | 6.563468e-08 | 22 |
| LMNA         | Naive IFN1 |       |       |              |    |
| 3.724913e-12 | -0.4385115 | 0.218 | 0.361 | 6.641148e-08 | 22 |
| H2AFV        | Naive IFN1 |       |       |              |    |
| 3.760244e-12 | -0.3680083 | 0.485 | 0.647 | 6.70414e-08  | 22 |
| HNRNPC       | Naive IFN1 |       |       |              |    |
| 3.832029e-12 | -0.6352497 | 0.571 | 0.697 | 6.832125e-08 | 22 |
| H2AFZ        | Naive IFN1 |       |       |              |    |
| 4.160266e-12 | -0.3192993 | 0.305 | 0.492 | 7.417338e-08 | 22 |
| CCT8         | Naive IFN1 |       |       |              |    |
| 4.217917e-12 | -0.3036526 | 0.299 | 0.487 | 7.520125e-08 | 22 |
| UBE2L3       | Naive IFN1 |       |       |              |    |
| 5.024412e-12 | -0.3933872 | 0.894 | 0.934 | 8.958024e-08 | 22 |
| SERF2        | Naive IFN1 |       |       |              |    |
| 5.034457e-12 | -0.3685892 | 0.074 | 0.194 | 8.975934e-08 | 22 |
| DNMT1        | Naive IFN1 |       |       |              |    |
| 5.50088e-12  | -0.305462  | 0.285 | 0.471 | 9.807519e-08 | 22 |
| SNRPF        | Naive IFN1 |       |       |              |    |
| 5.797082e-12 | -0.3259749 | 0.315 | 0.506 | 1.033562e-07 | 22 |
| EIF3I        | Naive IFN1 |       |       |              |    |
| 6.183918e-12 | -0.3553643 | 0.192 | 0.348 | 1.102531e-07 | 22 |
| H2AFY        | Naive IFN1 |       |       |              |    |



|              |            |       |       |              |    |
|--------------|------------|-------|-------|--------------|----|
| 6.276252e-12 | -0.3105977 | 0.403 | 0.598 | 1.118993e-07 | 22 |
| XRCC6        | Naive IFN1 |       |       |              |    |
| 6.339463e-12 | -0.3373218 | 0.403 | 0.597 | 1.130263e-07 | 22 |
| SRSF2        | Naive IFN1 |       |       |              |    |
| 8.250628e-12 | -0.3084645 | 0.07  | 0.179 | 1.471005e-07 | 22 |
| PLIN3        | Naive IFN1 |       |       |              |    |
| 1.18622e-11  | -0.388011  | 0.281 | 0.47  | 2.114912e-07 | 22 |
| CYCS         | Naive IFN1 |       |       |              |    |
| 1.20256e-11  | -0.3333342 | 0.086 | 0.225 | 2.144044e-07 | 22 |
| HSPH1        | Naive IFN1 |       |       |              |    |
| 1.233588e-11 | -0.3090754 | 0.088 | 0.226 | 2.199365e-07 | 22 |
| SIAH2        | Naive IFN1 |       |       |              |    |
| 1.338933e-11 | -0.317076  | 0.198 | 0.368 | 2.387184e-07 | 22 |
| RPS19BP1     | Naive IFN1 |       |       |              |    |
| 1.580429e-11 | -0.3511182 | 0.108 | 0.238 | 2.817747e-07 | 22 |
| DSTN         | Naive IFN1 |       |       |              |    |
| 1.585962e-11 | -0.3160588 | 0.469 | 0.655 | 2.827612e-07 | 22 |
| UBE2D3       | Naive IFN1 |       |       |              |    |
| 1.808427e-11 | -0.5200499 | 0.156 | 0.319 | 3.224244e-07 | 22 |
| DDX21        | Naive IFN1 |       |       |              |    |
| 2.006853e-11 | -0.3089627 | 0.208 | 0.387 | 3.578018e-07 | 22 |
| SNRPC        | Naive IFN1 |       |       |              |    |
| 2.508781e-11 | -0.4168527 | 0.18  | 0.355 | 4.472906e-07 | 22 |
| ANXA5        | Naive IFN1 |       |       |              |    |
| 2.945219e-11 | -0.3951574 | 0.329 | 0.514 | 5.25103e-07  | 22 |
| PA2G4        | Naive IFN1 |       |       |              |    |
| 3.382645e-11 | -0.4378816 | 0.244 | 0.41  | 6.030917e-07 | 22 |
| PPIB         | Naive IFN1 |       |       |              |    |
| 3.429959e-11 | 0.4257123  | 0.635 | 0.576 | 6.115274e-07 | 22 |
| SARAF        | Naive IFN1 |       |       |              |    |
| 3.432638e-11 | -0.410925  | 0.106 | 0.252 | 6.12005e-07  | 22 |
| GARS         | Naive IFN1 |       |       |              |    |
| 3.654983e-11 | -0.3055099 | 0.226 | 0.413 | 6.516469e-07 | 22 |
| HNRNPR       | Naive IFN1 |       |       |              |    |
| 3.750647e-11 | -0.345361  | 0.281 | 0.458 | 6.687029e-07 | 22 |
| LSM5         | Naive IFN1 |       |       |              |    |
| 5.524078e-11 | 0.3931624  | 0.13  | 0.068 | 9.848878e-07 | 22 |
| STAT2        | Naive IFN1 |       |       |              |    |
| 5.566492e-11 | -0.3137206 | 0.162 | 0.333 | 9.924498e-07 | 22 |
| PDAP1        | Naive IFN1 |       |       |              |    |
| 6.226786e-11 | -0.3389365 | 0.068 | 0.198 | 1.110174e-06 | 22 |
| GTPBP4       | Naive IFN1 |       |       |              |    |
| 6.231053e-11 | -0.5351173 | 0.986 | 0.99  | 1.110934e-06 | 22 |
| ACTB         | Naive IFN1 |       |       |              |    |
| 6.74659e-11  | -0.3200588 | 0.196 | 0.374 | 1.20285e-06  | 22 |
| ARHGDI A     | Naive IFN1 |       |       |              |    |
| 7.372664e-11 | -0.3134009 | 0.05  | 0.163 | 1.314472e-06 | 22 |
| PPP1R14B     | Naive IFN1 |       |       |              |    |
| 7.538082e-11 | -0.3064787 | 0.257 | 0.429 | 1.343965e-06 | 22 |
| MINOS1       | Naive IFN1 |       |       |              |    |

|              |            |       |       |              |    |
|--------------|------------|-------|-------|--------------|----|
| 8.23585e-11  | -0.3315913 | 0.07  | 0.198 | 1.46837e-06  | 22 |
| ATIC         | Naive IFN1 |       |       |              |    |
| 8.756814e-11 | 0.5002401  | 0.675 | 0.615 | 1.561252e-06 | 22 |
| MEF2C        | Naive IFN1 |       |       |              |    |
| 9.050991e-11 | 0.4677743  | 0.22  | 0.148 | 1.613701e-06 | 22 |
| TRIM56       | Naive IFN1 |       |       |              |    |
| 9.517286e-11 | -0.3575233 | 0.144 | 0.286 | 1.696837e-06 | 22 |
| CD82         | Naive IFN1 |       |       |              |    |
| 1.040695e-10 | -0.3004901 | 0.265 | 0.446 | 1.855455e-06 | 22 |
| CCT7         | Naive IFN1 |       |       |              |    |
| 1.128674e-10 | -0.3220979 | 0.251 | 0.43  | 2.012313e-06 | 22 |
| CCT2         | Naive IFN1 |       |       |              |    |
| 1.240415e-10 | -0.4316994 | 0.034 | 0.137 | 2.211536e-06 | 22 |
| PSAT1        | Naive IFN1 |       |       |              |    |
| 1.246947e-10 | -0.360893  | 0.144 | 0.303 | 2.223181e-06 | 22 |
| NOP58        | Naive IFN1 |       |       |              |    |
| 1.248677e-10 | -0.3357267 | 0.064 | 0.161 | 2.226266e-06 | 22 |
| C12orf75     | Naive IFN1 |       |       |              |    |
| 1.435994e-10 | -0.3088443 | 0.156 | 0.315 | 2.560233e-06 | 22 |
| STOML2       | Naive IFN1 |       |       |              |    |
| 1.501462e-10 | -0.313484  | 0.082 | 0.214 | 2.676957e-06 | 22 |
| PRPF19       | Naive IFN1 |       |       |              |    |
| 1.51713e-10  | 0.5170297  | 0.415 | 0.337 | 2.704891e-06 | 22 |
| HVCN1        | Naive IFN1 |       |       |              |    |
| 1.524121e-10 | -0.3347066 | 0.112 | 0.244 | 2.717355e-06 | 22 |
| SLBP         | Naive IFN1 |       |       |              |    |
| 1.819584e-10 | -0.3342153 | 0.176 | 0.321 | 3.244136e-06 | 22 |
| PRDX2        | Naive IFN1 |       |       |              |    |
| 2.024071e-10 | -0.3157225 | 0.066 | 0.184 | 3.608715e-06 | 22 |
| TMA16        | Naive IFN1 |       |       |              |    |
| 2.265803e-10 | -0.38841   | 0.07  | 0.177 | 4.0397e-06   | 22 |
| PDIA4        | Naive IFN1 |       |       |              |    |
| 2.409333e-10 | -0.3050225 | 0.439 | 0.622 | 4.295601e-06 | 22 |
| ACTR3        | Naive IFN1 |       |       |              |    |
| 2.560763e-10 | -0.3295664 | 0.244 | 0.377 | 4.565584e-06 | 22 |
| ACADM        | Naive IFN1 |       |       |              |    |
| 2.576293e-10 | -0.3519697 | 0.066 | 0.189 | 4.593273e-06 | 22 |
| GPATCH4      | Naive IFN1 |       |       |              |    |
| 2.6344e-10   | 0.5277464  | 0.385 | 0.273 | 4.696872e-06 | 22 |
| KLF2         | Naive IFN1 |       |       |              |    |
| 2.82911e-10  | -0.3046767 | 0.106 | 0.253 | 5.04402e-06  | 22 |
| NAA20        | Naive IFN1 |       |       |              |    |
| 2.956446e-10 | -0.3764139 | 0.074 | 0.189 | 5.271047e-06 | 22 |
| PCNA         | Naive IFN1 |       |       |              |    |
| 3.441292e-10 | -0.3410085 | 0.216 | 0.393 | 6.13548e-06  | 22 |
| ARPC5L       | Naive IFN1 |       |       |              |    |
| 4.018659e-10 | -0.3685498 | 0.427 | 0.612 | 7.164866e-06 | 22 |
| SYNGR2       | Naive IFN1 |       |       |              |    |
| 4.02324e-10  | -0.3149423 | 0.13  | 0.275 | 7.173034e-06 | 22 |
| NAA10        | Naive IFN1 |       |       |              |    |

|              |            |       |       |              |    |
|--------------|------------|-------|-------|--------------|----|
| 4.219454e-10 | -0.3267332 | 0.04  | 0.144 | 7.522865e-06 | 22 |
| NOP16        | Naive IFN1 |       |       |              |    |
| 4.234984e-10 | -0.3614338 | 0.194 | 0.363 | 7.550554e-06 | 22 |
| HSPA9        | Naive IFN1 |       |       |              |    |
| 4.332999e-10 | -0.3161225 | 0.098 | 0.235 | 7.725303e-06 | 22 |
| RALA         | Naive IFN1 |       |       |              |    |
| 4.431168e-10 | -0.3422045 | 0.255 | 0.431 | 7.900329e-06 | 22 |
| NSA2         | Naive IFN1 |       |       |              |    |
| 4.600265e-10 | -0.3247128 | 0.619 | 0.745 | 8.201812e-06 | 22 |
| CHCHD2       | Naive IFN1 |       |       |              |    |
| 4.801946e-10 | -0.3409911 | 0.07  | 0.189 | 8.56139e-06  | 22 |
| YARS         | Naive IFN1 |       |       |              |    |
| 5.122307e-10 | -0.3783221 | 0.19  | 0.337 | 9.132562e-06 | 22 |
| DUT          | Naive IFN1 |       |       |              |    |
| 6.77585e-10  | 0.3885322  | 0.525 | 0.494 | 1.208066e-05 | 22 |
| FXD5         | Naive IFN1 |       |       |              |    |
| 6.80112e-10  | -0.470404  | 0.16  | 0.328 | 1.212572e-05 | 22 |
| SLC3A2       | Naive IFN1 |       |       |              |    |
| 6.927928e-10 | -0.3510293 | 0.122 | 0.272 | 1.23518e-05  | 22 |
| TIMM10       | Naive IFN1 |       |       |              |    |
| 8.282369e-10 | -0.3112937 | 0.118 | 0.258 | 1.476664e-05 | 22 |
| GSPT1        | Naive IFN1 |       |       |              |    |
| 9.070811e-10 | -0.3988481 | 0.084 | 0.209 | 1.617235e-05 | 22 |
| PIM3         | Naive IFN1 |       |       |              |    |
| 9.54801e-10  | -0.4932168 | 0.146 | 0.278 | 1.702315e-05 | 22 |
| HSPA5        | Naive IFN1 |       |       |              |    |
| 1.020406e-09 | 0.4548028  | 0.349 | 0.277 | 1.819281e-05 | 22 |
| ADAM28       | Naive IFN1 |       |       |              |    |
| 1.197616e-09 | 0.4526602  | 0.505 | 0.447 | 2.13523e-05  | 22 |
| PNRC1        | Naive IFN1 |       |       |              |    |
| 1.241482e-09 | -0.3087797 | 0.126 | 0.259 | 2.213439e-05 | 22 |
| CDV3         | Naive IFN1 |       |       |              |    |
| 1.263728e-09 | -0.3056661 | 0.036 | 0.138 | 2.2531e-05   | 22 |
| IFRD2        | Naive IFN1 |       |       |              |    |
| 1.585934e-09 | 0.5080492  | 0.379 | 0.302 | 2.827562e-05 | 22 |
| ZFP36L2      | Naive IFN1 |       |       |              |    |
| 1.688959e-09 | 0.4896523  | 0.261 | 0.194 | 3.011246e-05 | 22 |
| CLEC2B       | Naive IFN1 |       |       |              |    |
| 1.859369e-09 | 0.5743999  | 0.365 | 0.327 | 3.315069e-05 | 22 |
| BST2         | Naive IFN1 |       |       |              |    |
| 2.68614e-09  | -0.3093863 | 0.142 | 0.292 | 4.789119e-05 | 22 |
| DCTPP1       | Naive IFN1 |       |       |              |    |
| 2.909562e-09 | -0.3062385 | 0.048 | 0.151 | 5.187457e-05 | 22 |
| RPF2         | Naive IFN1 |       |       |              |    |
| 3.313172e-09 | -0.3059408 | 0.291 | 0.462 | 5.907055e-05 | 22 |
| GADD45GIP1   | Naive IFN1 |       |       |              |    |
| 4.026605e-09 | -0.3366617 | 0.108 | 0.203 | 7.179033e-05 | 22 |
| HMCES        | Naive IFN1 |       |       |              |    |
| 4.8631e-09   | 0.4746193  | 0.489 | 0.455 | 8.670421e-05 | 22 |
| JUNB         | Naive IFN1 |       |       |              |    |

|              |            |       |       |              |    |
|--------------|------------|-------|-------|--------------|----|
| 5.005726e-09 | -0.3707972 | 0.283 | 0.419 | 8.924708e-05 | 22 |
| METAP2       | Naive IFN1 |       |       |              |    |
| 9.746371e-09 | 0.3949738  | 0.144 | 0.086 | 0.0001737681 | 22 |
| RNASE6       | Naive IFN1 |       |       |              |    |
| 1.044262e-08 | 0.3497075  | 0.419 | 0.352 | 0.0001861814 | 22 |
| TXNIP        | Naive IFN1 |       |       |              |    |
| 1.077681e-08 | 0.4670608  | 0.265 | 0.202 | 0.0001921397 | 22 |
| IRF1         | Naive IFN1 |       |       |              |    |
| 1.199921e-08 | -0.3067758 | 0.118 | 0.243 | 0.000213934  | 22 |
| SSR3         | Naive IFN1 |       |       |              |    |
| 1.256481e-08 | 0.440127   | 0.417 | 0.347 | 0.0002240179 | 22 |
| TRAF3IP3     | Naive IFN1 |       |       |              |    |
| 1.412056e-08 | -0.3079046 | 0.114 | 0.238 | 0.0002517555 | 22 |
| NIFK         | Naive IFN1 |       |       |              |    |
| 1.546026e-08 | 0.4838262  | 0.473 | 0.449 | 0.0002756409 | 22 |
| DRAP1        | Naive IFN1 |       |       |              |    |
| 1.625186e-08 | 0.5256724  | 0.269 | 0.205 | 0.0002897544 | 22 |
| PRKCB        | Naive IFN1 |       |       |              |    |
| 1.682633e-08 | -0.3988498 | 0.182 | 0.321 | 0.0002999967 | 22 |
| SEC11C       | Naive IFN1 |       |       |              |    |
| 2.267312e-08 | -1.294647  | 0.116 | 0.217 | 0.0004042391 | 22 |
| IGHG1        | Naive IFN1 |       |       |              |    |
| 3.431653e-08 | 0.4164586  | 0.164 | 0.105 | 0.0006118294 | 22 |
| C1orf162     | Naive IFN1 |       |       |              |    |
| 3.507507e-08 | 0.4784645  | 0.301 | 0.237 | 0.0006253534 | 22 |
| CD55         | Naive IFN1 |       |       |              |    |
| 4.302172e-08 | -1.049633  | 0.058 | 0.149 | 0.0007670343 | 22 |
| IGHA1        | Naive IFN1 |       |       |              |    |
| 6.164218e-08 | -0.3181614 | 0.569 | 0.695 | 0.001099018  | 22 |
| EZR          | Naive IFN1 |       |       |              |    |
| 8.510814e-08 | -0.3163077 | 0.034 | 0.13  | 0.001517393  | 22 |
| CCDC58       | Naive IFN1 |       |       |              |    |
| 1.041553e-07 | 0.3805067  | 0.172 | 0.113 | 0.001856985  | 22 |
| LGALS9       | Naive IFN1 |       |       |              |    |
| 1.342813e-07 | 0.3974047  | 0.445 | 0.413 | 0.002394102  | 22 |
| NPC2         | Naive IFN1 |       |       |              |    |
| 1.528764e-07 | 0.4625747  | 0.253 | 0.218 | 0.002725633  | 22 |
| CHMP5        | Naive IFN1 |       |       |              |    |
| 1.561784e-07 | 0.3651532  | 0.142 | 0.096 | 0.002784505  | 22 |
| UNC93B1      | Naive IFN1 |       |       |              |    |
| 1.901436e-07 | -0.300861  | 0.074 | 0.187 | 0.003390071  | 22 |
| WDR43        | Naive IFN1 |       |       |              |    |
| 2.347018e-07 | -1.768152  | 0.134 | 0.244 | 0.004184498  | 22 |
| IGHG4        | Naive IFN1 |       |       |              |    |
| 2.406305e-07 | 0.3742252  | 0.184 | 0.142 | 0.004290201  | 22 |
| NUB1         | Naive IFN1 |       |       |              |    |
| 2.693392e-07 | -0.5135341 | 0.192 | 0.314 | 0.004802048  | 22 |
| HSP90B1      | Naive IFN1 |       |       |              |    |
| 2.74245e-07  | -0.405871  | 0.064 | 0.161 | 0.004889515  | 22 |
| DDIT4        | Naive IFN1 |       |       |              |    |

|              |            |            |       |       |             |             |     |
|--------------|------------|------------|-------|-------|-------------|-------------|-----|
| 2.888e-07    |            | 0.350112   | 0.591 | 0.57  | 0.005149015 | 22          |     |
| SNX2         | Naive IFN1 |            |       |       |             |             |     |
| 2.907919e-07 |            | 0.385607   | 0.357 | 0.296 | 0.005184529 | 22          |     |
| PDLIM1       | Naive IFN1 |            |       |       |             |             |     |
| 3.12225e-07  |            | 0.3232114  |       | 0.275 | 0.219       | 0.00556666  | 22  |
|              | GBP2       | Naive IFN1 |       |       |             |             |     |
| 3.619367e-07 |            | 0.4108403  |       | 0.202 | 0.157       | 0.006452969 | 22  |
|              | SHISA5     | Naive IFN1 |       |       |             |             |     |
| 5.037756e-07 |            | -0.4060343 |       | 0.046 | 0.126       | 0.008981816 | 22  |
|              | LGALS3     | Naive IFN1 |       |       |             |             |     |
| 5.549273e-07 |            | 0.3410981  |       | 0.102 | 0.056       | 0.009893799 | 22  |
|              | TNFSF10    | Naive IFN1 |       |       |             |             |     |
| 6.674191e-07 |            | 0.4276026  |       | 0.15  | 0.095       | 0.01189941  | 22  |
|              | MT2A       | Naive IFN1 |       |       |             |             |     |
| 6.743209e-07 |            | -0.302687  |       | 0.064 | 0.152       | 0.01202247  | 22  |
|              | CTNNB1     | Naive IFN1 |       |       |             |             |     |
| 6.746587e-07 |            | -0.4269623 |       | 0.89  | 0.932       | 0.01202849  | 22  |
|              | HMGB1      | Naive IFN1 |       |       |             |             |     |
| 6.795749e-07 |            | -0.3852877 |       | 0.136 | 0.257       | 0.01211614  | 22  |
|              | SRGN       | Naive IFN1 |       |       |             |             |     |
| 8.196491e-07 |            | -0.6654037 |       | 0.114 | 0.207       | 0.01461352  | 22  |
|              | LGALS1     | Naive IFN1 |       |       |             |             |     |
| 8.874133e-07 |            | -0.327325  |       | 0.088 | 0.178       | 0.01582169  | 22  |
|              | BCL2A1     | Naive IFN1 |       |       |             |             |     |
| 1.091696e-06 |            | 0.32556    | 0.928 | 0.934 | 0.01946384  | 22          | MT- |
| ATP6         | Naive IFN1 |            |       |       |             |             |     |
| 1.187326e-06 |            | 0.3996691  |       | 0.383 | 0.359       | 0.02116883  | 22  |
|              | ARID5B     | Naive IFN1 |       |       |             |             |     |
| 1.215967e-06 |            | 0.4188422  |       | 0.325 | 0.279       | 0.02167947  | 22  |
|              | RNASET2    | Naive IFN1 |       |       |             |             |     |
| 1.462949e-06 |            | 0.3864095  |       | 0.367 | 0.329       | 0.02608293  | 22  |
|              | SMC6       | Naive IFN1 |       |       |             |             |     |
| 1.514891e-06 |            | 0.3554095  |       | 0.168 | 0.128       | 0.02700899  | 22  |
|              | C19orf66   | Naive IFN1 |       |       |             |             |     |
| 1.931851e-06 |            | 0.3653326  |       | 0.17  | 0.117       | 0.03444298  | 22  |
|              | CARD16     | Naive IFN1 |       |       |             |             |     |
| 2.273761e-06 |            | 0.3813116  |       | 0.226 | 0.188       | 0.04053888  | 22  |
|              | PHF11      | Naive IFN1 |       |       |             |             |     |
| 2.807273e-06 |            | 0.3128408  |       | 0.22  | 0.196       | 0.05005087  | 22  |
|              | TYMP       | Naive IFN1 |       |       |             |             |     |
| 3.549247e-06 |            | 0.3979736  |       | 0.267 | 0.211       | 0.06327952  | 22  |
|              | LBH        | Naive IFN1 |       |       |             |             |     |
| 3.897989e-06 |            | 0.3799192  |       | 0.301 | 0.256       | 0.06949724  | 22  |
|              | LYSMD2     | Naive IFN1 |       |       |             |             |     |
| 3.961688e-06 |            | 0.3974381  |       | 0.549 | 0.488       | 0.07063293  | 22  |
|              | UCP2       | Naive IFN1 |       |       |             |             |     |
| 4.371335e-06 |            | 0.321569   | 0.523 | 0.491 | 0.07793654  | 22          |     |
| CYTIP        | Naive IFN1 |            |       |       |             |             |     |
| 5.292655e-06 |            | 0.3633654  |       | 0.238 | 0.173       | 0.09436275  | 22  |
|              | MARCH1     | Naive IFN1 |       |       |             |             |     |

|              |            |       |       |           |     |
|--------------|------------|-------|-------|-----------|-----|
| 6.185285e-06 | -0.5728578 | 0.457 | 0.571 | 0.1102775 | 22  |
| VIM          | Naive IFN1 |       |       |           |     |
| 8.32097e-06  | 0.4171732  | 0.323 | 0.268 | 0.1483546 | 22  |
| JUN          | Naive IFN1 |       |       |           |     |
| 9.24702e-06  | 0.4359181  | 0.527 | 0.502 | 0.1648651 | 22  |
| PSMB9        | Naive IFN1 |       |       |           |     |
| 9.825512e-06 | 0.3405392  | 0.162 | 0.109 | 0.1751791 | 22  |
| LINC02397    | Naive IFN1 |       |       |           |     |
| 1.097008e-05 | -2.029209  | 0.072 | 0.126 | 0.1955856 | 22  |
| IGHG2        | Naive IFN1 |       |       |           |     |
| 1.129793e-05 | -0.3528056 | 0.116 | 0.219 | 0.2014308 | 22  |
| EIF4EBP1     | Naive IFN1 |       |       |           |     |
| 1.220912e-05 | -0.3995494 | 0.371 | 0.501 | 0.2176764 | 22  |
| SSR4         | Naive IFN1 |       |       |           |     |
| 1.249534e-05 | 0.3905237  | 0.259 | 0.206 | 0.2227794 | 22  |
| C16orf74     | Naive IFN1 |       |       |           |     |
| 1.41412e-05  | 0.3283035  | 0.373 | 0.336 | 0.2521235 | 22  |
| CD48         | Naive IFN1 |       |       |           |     |
| 1.510572e-05 | -0.3551694 | 0.144 | 0.242 | 0.2693199 | 22  |
| RGS1         | Naive IFN1 |       |       |           |     |
| 2.158158e-05 | -1.131977  | 0.371 | 0.404 | 0.384778  | 22  |
| JCHAIN       | Naive IFN1 |       |       |           |     |
| 2.187647e-05 | 0.3339065  | 0.23  | 0.195 | 0.3900356 | 22  |
| CHPT1        | Naive IFN1 |       |       |           |     |
| 3.75671e-05  | 0.3655729  | 0.228 | 0.186 | 0.6697838 | 22  |
| CDCA7L       | Naive IFN1 |       |       |           |     |
| 4.034327e-05 | -0.4621649 | 0.058 | 0.131 | 0.7192802 | 22  |
| MYC          | Naive IFN1 |       |       |           |     |
| 5.087496e-05 | 0.3372102  | 0.493 | 0.492 | 0.9070497 | 22  |
| ANKRD12      | Naive IFN1 |       |       |           |     |
| 5.12962e-05  | 0.3661196  | 0.186 | 0.159 | 0.9145599 | 22  |
| AIDA         | Naive IFN1 |       |       |           |     |
| 9.038648e-05 | 0.3395257  | 0.218 | 0.201 | 1         | 22  |
| Naive IFN1   |            |       |       |           | NMI |
| 0.0001100697 | 0.3347856  | 0.457 | 0.455 | 1         | 22  |
| CTSS         | Naive IFN1 |       |       |           |     |
| 0.0002617102 | 0.3679612  | 0.184 | 0.177 | 1         | 22  |
| LAP3         | Naive IFN1 |       |       |           |     |
| 0.0002949907 | 0.3122449  | 0.148 | 0.122 | 1         | 22  |
| ZC3HAV1      | Naive IFN1 |       |       |           |     |
| 0.0003416338 | -0.5143228 | 0.136 | 0.212 | 1         | 22  |
| PLCG2        | Naive IFN1 |       |       |           |     |
| 0.0003707151 | 0.3812086  | 0.433 | 0.422 | 1         | 22  |
| TMEM123      | Naive IFN1 |       |       |           |     |
| 0.0003858281 | -0.3719764 | 0.367 | 0.473 | 1         | 22  |
| CD83         | Naive IFN1 |       |       |           |     |
| 0.0004042581 | 0.3970493  | 0.399 | 0.363 | 1         | 22  |
| RCSD1        | Naive IFN1 |       |       |           |     |
| 0.0005939612 | 0.3125635  | 0.473 | 0.476 | 1         | 22  |
| N4BP2L2      | Naive IFN1 |       |       |           |     |

|               |            |       |       |               |    |              |
|---------------|------------|-------|-------|---------------|----|--------------|
| 0.0008020495  | 0.3074769  | 0.154 | 0.122 | 1             | 22 |              |
| AL139020.1    | Naive IFN1 |       |       |               |    |              |
| 0.0008241087  | 0.3046701  | 0.475 | 0.472 | 1             | 22 |              |
| GPSM3         | Naive IFN1 |       |       |               |    |              |
| 0.000884767   | 0.3740536  | 0.16  | 0.144 | 1             | 22 |              |
| HSH2D         | Naive IFN1 |       |       |               |    |              |
| 0.0009569697  | 0.3720921  | 0.224 | 0.207 | 1             | 22 |              |
| CCDC32        | Naive IFN1 |       |       |               |    |              |
| 0.001666532   | 0.3335397  | 0.397 | 0.384 | 1             | 22 | EVL          |
|               | Naive IFN1 |       |       |               |    |              |
| 0.003024793   | -0.4305117 | 0.395 | 0.428 | 1             | 22 |              |
| STMN1         | Naive IFN1 |       |       |               |    |              |
| 0.004187886   | 0.3548205  | 0.403 | 0.403 | 1             | 22 |              |
| STX7          | Naive IFN1 |       |       |               |    |              |
| 0.005185881   | 0.3492803  | 0.337 | 0.323 | 1             | 22 | AES          |
|               | Naive IFN1 |       |       |               |    |              |
| 0.007313198   | 0.3650378  | 0.515 | 0.497 | 1             | 22 |              |
| SAT1          | Naive IFN1 |       |       |               |    |              |
| 0.0086371     | 0.322102   | 0.208 | 0.226 | 1             | 22 | BAG1         |
|               | Naive IFN1 |       |       |               |    |              |
| 0             | 4.270956   | 0.997 | 0.906 | 0             | 23 | IGHM ASC IgM |
| 1.177773e-266 | 3.534745   | 0.938 | 0.17  | 2.099851e-262 | 23 |              |
| MZB1          | ASC IgM    |       |       |               |    |              |
| 1.727266e-244 | 2.587461   | 0.911 | 0.308 | 3.079543e-240 | 23 |              |
| HSP90B1       | ASC IgM    |       |       |               |    |              |
| 6.511188e-228 | 3.225788   | 0.973 | 0.399 | 1.16088e-223  | 23 |              |
| JCHAIN        | ASC IgM    |       |       |               |    |              |
| 3.312784e-222 | 2.56983    | 0.926 | 0.176 | 5.906362e-218 | 23 |              |
| XBP1          | ASC IgM    |       |       |               |    |              |
| 1.711882e-175 | 1.886325   | 0.97  | 0.633 | 3.052115e-171 | 23 |              |
| HERPUD1       | ASC IgM    |       |       |               |    |              |
| 1.230135e-172 | 2.005618   | 0.881 | 0.236 | 2.193208e-168 | 23 |              |
| RGS1          | ASC IgM    |       |       |               |    |              |
| 1.813651e-169 | 2.019751   | 0.884 | 0.315 | 3.233559e-165 | 23 |              |
| SEC11C        | ASC IgM    |       |       |               |    |              |
| 4.049659e-164 | -1.337277  | 1     | 1     | 7.220137e-160 | 23 |              |
|               | RPL21      |       |       |               |    |              |
| 1.041388e-161 | -1.868718  | 0.967 | 0.998 | 1.856691e-157 | 23 |              |
|               | TMSB4X     |       |       |               |    |              |
| 1.940343e-154 | -1.280239  | 0.997 | 1     | 3.459438e-150 | 23 |              |
|               | RPS27      |       |       |               |    |              |
| 4.041849e-154 | 2.036995   | 0.914 | 0.496 | 7.206213e-150 | 23 |              |
| SSR4          | ASC IgM    |       |       |               |    |              |
| 1.354298e-152 | 1.819619   | 0.884 | 0.404 | 2.414577e-148 | 23 |              |
| PPIB          | ASC IgM    |       |       |               |    |              |
| 1.093025e-150 | 1.826258   | 0.682 | 0.087 | 1.948754e-146 | 23 |              |
| FKBP11        | ASC IgM    |       |       |               |    |              |
| 1.447263e-148 | 1.070818   | 1     | 0.986 | 2.580325e-144 | 23 |              |
| HLA-B         | ASC IgM    |       |       |               |    |              |
| 2.838303e-147 | 1.786085   | 0.742 | 0.066 | 5.06041e-143  | 23 |              |

|           |         |               |           |       |       |               |               |     |
|-----------|---------|---------------|-----------|-------|-------|---------------|---------------|-----|
| RASSF6    | ASC IgM | 8.605834e-143 | 1.835625  | 0.763 | 0.171 | 1.534334e-138 | 23            |     |
| PDIA4     | ASC IgM | 7.980444e-142 | 1.784292  | 0.733 | 0.142 | 1.422833e-137 | 23            |     |
| SDF2L1    | ASC IgM | 3.657468e-140 | -1.728962 |       | 0.976 | 0.996         | 6.520899e-136 | 23  |
|           | RPS12   |               |           |       |       |               |               |     |
|           | ASC IgM | 5.168938e-134 | 1.81246   | 0.843 | 0.273 | 9.215699e-130 | 23            |     |
| HSPA5     | ASC IgM | 1.33874e-133  | 1.64795   | 0.813 | 0.236 | 2.38684e-129  | 23            |     |
| MYDGF     | ASC IgM | 1.911724e-131 | -1.441959 |       | 0.988 | 0.999         | 3.408414e-127 | 23  |
|           | RPL39   |               |           |       |       |               |               |     |
|           | ASC IgM | 4.823261e-126 | 1.342242  | 0.961 | 0.595 | 8.599392e-122 | 23            |     |
| SEC61B    | ASC IgM | 5.402459e-122 | 1.319957  | 0.561 | 0.026 | 9.632044e-118 | 23            |     |
| PRDM1     | ASC IgM | 6.358548e-122 | -1.17531  | 0.982 | 0.999 | 1.133666e-117 | 23            |     |
| RPS27A    | ASC IgM | 6.179782e-121 | -1.257802 |       | 0.994 | 0.999         | 1.101793e-116 | 23  |
|           | RPL34   |               |           |       |       |               |               |     |
|           | ASC IgM | 1.192749e-118 | -1.386627 |       | 0.982 | 0.995         | 2.126552e-114 | 23  |
|           | RPL31   |               |           |       |       |               |               |     |
|           | ASC IgM | 2.325975e-118 | -1.301441 |       | 0.994 | 0.999         | 4.146982e-114 | 23  |
|           | RPL32   |               |           |       |       |               |               |     |
|           | ASC IgM | 1.963141e-117 | -1.088786 |       | 0.991 | 0.999         | 3.500084e-113 | 23  |
|           | RPS18   |               |           |       |       |               |               |     |
|           | ASC IgM | 5.952239e-117 | -1.215623 |       | 0.988 | 0.999         | 1.061225e-112 | 23  |
|           | RPS6    |               |           |       |       |               |               |     |
|           | ASC IgM | 1.673382e-116 | 1.71898   | 0.588 | 0.082 | 2.983472e-112 | 23            |     |
| LINC01480 | ASC IgM | 3.248518e-116 | -1.228189 |       | 0.988 | 0.999         | 5.791783e-112 | 23  |
|           | RPS19   |               |           |       |       |               |               |     |
|           | ASC IgM | 8.065632e-116 | 1.877939  | 0.816 | 0.144 | 1.438022e-111 | 23            | BIK |
|           | ASC IgM | 1.37687e-115  | -1.323451 |       | 0.979 | 0.998         | 2.454821e-111 | 23  |
|           | RPS3A   |               |           |       |       |               |               |     |
|           | ASC IgM | 3.329207e-114 | 1.44402   | 0.852 | 0.346 | 5.935643e-110 | 23            |     |
| PDIA6     | ASC IgM | 1.408596e-113 | 1.370299  | 0.935 | 0.551 | 2.511385e-109 | 23            |     |
| SEC61G    | ASC IgM | 6.611728e-112 | -1.120159 |       | 0.997 | 0.999         | 1.178805e-107 | 23  |
|           | RPL13A  |               |           |       |       |               |               |     |
|           | ASC IgM | 8.634896e-111 | -1.109924 |       | 0.988 | 0.999         | 1.539516e-106 | 23  |
|           | RPS8    |               |           |       |       |               |               |     |
|           | ASC IgM | 1.465793e-110 | -1.331285 |       | 0.988 | 0.998         | 2.613362e-106 | 23  |
|           | RPL11   |               |           |       |       |               |               |     |
|           | ASC IgM | 3.487096e-110 | -1.260932 |       | 0.991 | 0.999         | 6.217144e-106 | 23  |
|           | RPS29   |               |           |       |       |               |               |     |
|           | ASC IgM | 4.371252e-110 | 1.509459  | 0.721 | 0.188 | 7.793506e-106 | 23            |     |



|               |         |            |       |       |               |              |     |
|---------------|---------|------------|-------|-------|---------------|--------------|-----|
| MANF          | ASC IgM |            |       |       |               |              |     |
| 6.421991e-109 |         | 1.970378   | 0.896 | 0.201 | 1.144977e-104 | 23           |     |
| RGS13         | ASC IgM |            |       |       |               |              |     |
| 6.558501e-109 |         | 1.543817   | 0.718 | 0.114 | 1.169315e-104 | 23           |     |
| CD38          | ASC IgM |            |       |       |               |              |     |
| 1.311577e-108 |         | -1.278756  |       | 0.994 | 0.999         | 2.33841e-104 | 23  |
|               | RPLP2   |            |       |       |               |              |     |
| 1.35457e-106  | ASC IgM | 1.526123   | 0.825 | 0.273 | 2.415063e-102 | 23           |     |
| PIM2          | ASC IgM |            |       |       |               |              |     |
| 1.501887e-105 |         | 1.515086   | 0.632 | 0.081 | 2.677714e-101 | 23           |     |
| HIST1H1C      | ASC IgM |            |       |       |               |              |     |
| 8.395754e-105 |         | 1.484818   | 0.84  | 0.363 | 1.496879e-100 | 23           |     |
| SELENOK       | ASC IgM |            |       |       |               |              |     |
| 2.96858e-104  |         | 1.28795    | 0.78  | 0.252 | 5.292682e-100 | 23           |     |
| SRGN          | ASC IgM |            |       |       |               |              |     |
| 6.059907e-104 |         | -1.200953  |       | 0.994 | 0.997         | 1.080421e-99 | 23  |
|               | RPS23   |            |       |       |               |              |     |
| 1.625713e-103 | ASC IgM | 1.607377   | 0.721 | 0.106 | 2.898484e-99  | 23           | CD9 |
|               | ASC IgM |            |       |       |               |              |     |
| 6.775884e-101 |         | -1.016903  |       | 1     | 0.999         | 1.208072e-96 | 23  |
|               | RPS2    |            |       |       |               |              |     |
| 1.1406e-100   | ASC IgM | 1.307685   | 0.887 | 0.526 | 2.033576e-96  | 23           |     |
| SPCS2         | ASC IgM |            |       |       |               |              |     |
| 4.147022e-100 |         | 1.409025   | 0.807 | 0.305 | 7.393725e-96  | 23           |     |
| CALR          | ASC IgM |            |       |       |               |              |     |
| 5.138937e-100 |         | 1.546533   | 0.819 | 0.164 | 9.162212e-96  | 23           |     |
| CCDC88A       | ASC IgM |            |       |       |               |              |     |
| 4.411092e-99  |         | -1.105531  |       | 0.985 | 0.998         | 7.864537e-95 | 23  |
|               | RPL26   |            |       |       |               |              |     |
| 2.105055e-98  | ASC IgM | 1.82938    | 0.739 | 0.182 | 3.753102e-94  | 23           |     |
| RGS2          | ASC IgM |            |       |       |               |              |     |
| 2.765881e-97  |         | 1.295242   | 0.644 | 0.115 | 4.931289e-93  | 23           |     |
| LMAN1         | ASC IgM |            |       |       |               |              |     |
| 9.036719e-97  |         | 1.186438   | 0.976 | 0.761 | 1.611157e-92  | 23           |     |
| CYBA          | ASC IgM |            |       |       |               |              |     |
| 3.430392e-95  |         | 1.358947   | 0.76  | 0.237 | 6.116046e-91  | 23           |     |
| SSR3          | ASC IgM |            |       |       |               |              |     |
| 4.751439e-95  |         | 1.40471    | 0.908 | 0.481 | 8.471341e-91  | 23           |     |
| NEAT1         | ASC IgM |            |       |       |               |              |     |
| 8.469756e-95  |         | -1.129964  |       | 0.994 | 0.999         | 1.510073e-90 | 23  |
|               | RPL13   |            |       |       |               |              |     |
| 9.325037e-95  | ASC IgM | -1.314344  |       | 0.982 | 0.996         | 1.662561e-90 | 23  |
|               | RPL12   |            |       |       |               |              |     |
| 8.769543e-93  | ASC IgM | 1.209339   | 0.953 | 0.618 | 1.563522e-88  | 23           |     |
| SUB1          | ASC IgM |            |       |       |               |              |     |
| 2.240808e-91  |         | 1.270876   | 0.671 | 0.159 | 3.995136e-87  | 23           |     |
| HM13          | ASC IgM |            |       |       |               |              |     |
| 2.652365e-91  |         | -1.144952  |       | 0.997 | 0.997         | 4.728902e-87 | 23  |
|               | RPL7    |            |       |       |               |              |     |
| 1.051065e-90  | ASC IgM | -0.9273536 |       | 0.997 | 1             | 1.873944e-86 | 23  |

|              |         |         |                |       |              |              |    |
|--------------|---------|---------|----------------|-------|--------------|--------------|----|
| 9.659565e-90 | RPL41   | ASC IgM | -1.087056      | 0.982 | 0.998        | 1.722204e-85 | 23 |
| 1.013592e-89 | RPL23A  | ASC IgM | -1.167679      | 0.988 | 0.998        | 1.807134e-85 | 23 |
| 3.011327e-88 | RPL18A  | ASC IgM | 1.15545 0.813  | 0.321 | 5.368895e-84 | 23           |    |
| 1.136866e-87 | P4HB    | ASC IgM | 1.032227 0.596 | 0.077 | 2.026918e-83 | 23           |    |
| 2.679035e-87 | TXNDC11 | ASC IgM | -1.301431      | 0.973 | 0.991        | 4.776452e-83 | 23 |
| 2.357679e-86 | RPL30   | ASC IgM | 1.186489 0.804 | 0.266 | 4.203506e-82 | 23           |    |
| 5.217544e-86 | ARF4    | ASC IgM | 1.285935 0.763 | 0.259 | 9.302359e-82 | 23           |    |
| 2.011504e-85 | FKBP2   | ASC IgM | 1.051636 0.561 | 0.079 | 3.586311e-81 | 23           |    |
| 3.044466e-85 | GMPPB   | ASC IgM | 1.126698 0.623 | 0.093 | 5.427978e-81 | 23           |    |
| 4.85829e-84  | PDXK    | ASC IgM | -1.485028      | 0.926 | 0.976        | 8.661845e-80 | 23 |
| 4.120319e-83 | RPL36A  | ASC IgM | 1.169025 0.638 | 0.111 | 7.346117e-79 | 23           |    |
| 1.371149e-82 | DNAJB9  | ASC IgM | 1.233071 0.78  | 0.279 | 2.444622e-78 | 23           |    |
| 2.173133e-82 | RPN2    | ASC IgM | -1.008508      | 0.994 | 0.999        | 3.874479e-78 | 23 |
| 6.59234e-82  | EEF1A1  | ASC IgM | 1.259407 0.724 | 0.222 | 1.175348e-77 | 23           |    |
| 1.888983e-79 | KDEL2   | ASC IgM | -1.055511      | 0.973 | 0.996        | 3.367868e-75 | 23 |
| 2.693698e-79 | RPL35A  | ASC IgM | -1.023398      | 0.991 | 0.997        | 4.802595e-75 | 23 |
| 9.727037e-78 | RPL27A  | ASC IgM | 1.392445 0.51  | 0.051 | 1.734233e-73 | 23           |    |
| 2.108208e-77 | DERL3   | ASC IgM | -0.9349258     | 0.976 | 0.997        | 3.758724e-73 | 23 |
| 3.003656e-77 | RPS15A  | ASC IgM | -1.090197      | 0.985 | 0.995        | 5.355218e-73 | 23 |
| 1.129552e-76 | RPS25   | ASC IgM | 1.298774 0.825 | 0.23  | 2.013879e-72 | 23           |    |
| 1.162278e-76 | UBE2J1  | ASC IgM | -1.525904      | 0.828 | 0.936        | 2.072226e-72 | 23 |
| 1.348326e-76 | BTG1    | ASC IgM | 0.7349896      | 0.967 | 0.75         | 2.40393e-72  | 23 |
| 2.067565e-75 | HLA-C   | ASC IgM | 1.038604 0.884 | 0.358 | 3.686262e-71 | 23           |    |
| 2.813735e-75 | REEP5   | ASC IgM | -0.9046495     | 0.997 | 0.998        | 5.016609e-71 | 23 |
| 1.243781e-74 | RPL19   | ASC IgM | -1.846317      | 0.386 | 0.753        | 2.217538e-70 | 23 |

|              |          |         |                |       |              |              |     |
|--------------|----------|---------|----------------|-------|--------------|--------------|-----|
| 1.625963e-74 | CXCR4    | ASC IgM | -1.291802      | 0.688 | 0.883        | 2.898929e-70 | 23  |
| 4.490294e-74 | MS4A1    | ASC IgM | 0.930637 0.27  | 0.011 | 8.005746e-70 | 23           | ADM |
| 4.974033e-74 | ASC IgM  |         | -1.142063      | 0.961 | 0.99         | 8.868203e-70 | 23  |
| 6.601697e-74 | ACTB     | ASC IgM | -0.9146636     | 0.991 | 0.998        | 1.177017e-69 | 23  |
| 1.38831e-73  | RPS15    | ASC IgM | 1.080288 0.804 | 0.312 | 2.475217e-69 | 23           |     |
| 2.834234e-73 | TRAM1    | ASC IgM | -1.366971      | 0.973 | 0.983        | 5.053155e-69 | 23  |
| 5.925471e-73 | RPS21    | ASC IgM | -0.8303389     | 0.994 | 0.999        | 1.056452e-68 | 23  |
| 4.862626e-72 | PTMA     | ASC IgM | 1.34642 0.567  | 0.11  | 8.669576e-68 | 23           |     |
| 7.847823e-72 | TNFRSF17 | ASC IgM | -1.0129 0.991  | 0.998 | 1.399188e-67 | 23           |     |
| 9.609337e-72 | RPS14    | ASC IgM | -0.948884      | 0.985 | 0.996        | 1.713249e-67 | 23  |
| 3.066723e-71 | RPS3     | ASC IgM | -1.247611      | 0.976 | 0.991        | 5.46766e-67  | 23  |
| 4.709578e-71 | RPL9     | ASC IgM | -1.806732      | 0.237 | 0.651        | 8.396707e-67 | 23  |
| 7.566888e-71 | ZFP36L1  | ASC IgM | -1.091327      | 0.991 | 0.992        | 1.3491e-66   | 23  |
| 1.65388e-70  | RPL37    | ASC IgM | 1.082498 0.635 | 0.153 | 2.948702e-66 | 23           |     |
| 2.411923e-70 | DNAJB11  | ASC IgM | 1.007599 0.947 | 0.63  | 4.300217e-66 | 23           |     |
| 2.77696e-70  | GSTP1    | ASC IgM | -1.098982      | 0.985 | 0.991        | 4.951042e-66 | 23  |
| 3.11741e-70  | RPS20    | ASC IgM | 1.044551 0.721 | 0.229 | 5.558031e-66 | 23           |     |
| 1.405309e-68 | TMED10   | ASC IgM | -1.22328 0.955 | 0.987 | 2.505526e-64 | 23           |     |
| 1.525311e-68 | RPL14    | ASC IgM | -1.113068      | 0.991 | 0.993        | 2.719477e-64 | 23  |
| 1.693185e-68 | RPL35    | ASC IgM | -1.415748      | 0.7   | 0.849        | 3.01878e-64  | 23  |
| 1.824034e-68 | CD37     | ASC IgM | -1.161551      | 0.982 | 0.992        | 3.25207e-64  | 23  |
| 4.202349e-68 | RPL36    | ASC IgM | 0.6868138      | 0.386 | 0.03         | 7.492368e-64 | 23  |
| 4.836628e-68 | CHPF     | ASC IgM | 1.095685 0.703 | 0.206 | 8.623224e-64 | 23           |     |
| 5.543389e-68 | SELENOS  | ASC IgM | 1.025358 0.884 | 0.496 | 9.883307e-64 | 23           |     |
| 6.630291e-68 | SPCS1    | ASC IgM | 1.019191 0.57  | 0.111 | 1.182115e-63 | 23           |     |

|              |         |                |       |              |              |    |
|--------------|---------|----------------|-------|--------------|--------------|----|
| CRELD2       | ASC IgM |                |       |              |              |    |
| 1.064767e-67 |         | 1.050292 0.831 | 0.405 | 1.898372e-63 | 23           |    |
| TMED9        | ASC IgM |                |       |              |              |    |
| 2.758116e-67 |         | -1.225575      | 0.97  | 0.981        | 4.917444e-63 | 23 |
|              | RPSA    | ASC IgM        |       |              |              |    |
| 8.260938e-67 |         | -1.034734      | 0.982 | 0.995        | 1.472843e-62 | 23 |
|              | RPL37A  | ASC IgM        |       |              |              |    |
| 5.349173e-66 |         | 0.8221164      | 0.442 | 0.036        | 9.53704e-62  | 23 |
|              | MAN1A1  | ASC IgM        |       |              |              |    |
| 2.451795e-63 |         | -0.9175671     | 0.997 | 0.996        | 4.371306e-59 | 23 |
|              | RPS13   | ASC IgM        |       |              |              |    |
| 2.85078e-63  |         | 0.9828896      | 0.878 | 0.474        | 5.082655e-59 | 23 |
|              | SSR2    | ASC IgM        |       |              |              |    |
| 8.574836e-63 |         | 3.048968 0.976 | 0.926 | 1.528808e-58 | 23           |    |
| IGKC         | ASC IgM |                |       |              |              |    |
| 1.377413e-62 |         | -0.8163548     | 0.997 | 0.999        | 2.45579e-58  | 23 |
|              | RPLP1   | ASC IgM        |       |              |              |    |
| 2.871904e-61 |         | 0.97238 0.866  | 0.45  | 5.120318e-57 | 23           |    |
| TMEM59       | ASC IgM |                |       |              |              |    |
| 3.342401e-61 |         | 0.8449251      | 0.49  | 0.078        | 5.959167e-57 | 23 |
|              | CLPTM1L | ASC IgM        |       |              |              |    |
| 5.465428e-61 |         | 0.9900029      | 0.611 | 0.143        | 9.744312e-57 | 23 |
|              | SPCS3   | ASC IgM        |       |              |              |    |
| 5.754005e-61 |         | 1.076196 0.748 | 0.232 | 1.025882e-56 | 23           |    |
| DSTN         | ASC IgM |                |       |              |              |    |
| 9.002043e-61 |         | 0.9153262      | 0.849 | 0.434        | 1.604974e-56 | 23 |
|              | DAD1    | ASC IgM        |       |              |              |    |
| 3.276963e-60 |         | 0.8798515      | 0.843 | 0.385        | 5.842496e-56 | 23 |
|              | CUTA    | ASC IgM        |       |              |              |    |
| 8.26827e-60  |         | -1.288205      | 0.935 | 0.968        | 1.47415e-55  | 23 |
|              | RPS17   | ASC IgM        |       |              |              |    |
| 9.971201e-60 |         | 0.7504467      | 0.43  | 0.054        | 1.777765e-55 | 23 |
|              | ANKRD28 | ASC IgM        |       |              |              |    |
| 1.910539e-59 |         | 0.8224248      | 0.487 | 0.06         | 3.406301e-55 | 23 |
|              | CHST2   | ASC IgM        |       |              |              |    |
| 3.008184e-59 |         | 0.9709451      | 0.872 | 0.479        | 5.363292e-55 | 23 |
|              | RABAC1  | ASC IgM        |       |              |              |    |
| 7.442233e-59 |         | -0.7271728     | 0.997 | 0.998        | 1.326876e-54 | 23 |
|              | RPL15   | ASC IgM        |       |              |              |    |
| 7.546799e-58 |         | 0.9618266      | 0.881 | 0.466        | 1.345519e-53 | 23 |
|              | MTDH    | ASC IgM        |       |              |              |    |
| 8.847519e-58 |         | 1.043988 0.982 | 0.865 | 1.577424e-53 | 23           |    |
| CD79A        | ASC IgM |                |       |              |              |    |
| 2.33682e-56  |         | 0.9040481      | 0.617 | 0.142        | 4.166317e-52 | 23 |
|              | ERLEC1  | ASC IgM        |       |              |              |    |
| 3.219191e-56 |         | -1.996552      | 0.154 | 0.546        | 5.739495e-52 | 23 |
|              | CCR7    | ASC IgM        |       |              |              |    |
| 7.753725e-56 |         | 0.8783813      | 0.466 | 0.071        | 1.382412e-51 | 23 |
|              | DOK3    | ASC IgM        |       |              |              |    |
| 4.697198e-55 |         | -1.06214 0.964 | 0.976 | 8.374634e-51 | 23           |    |

|              |            |         |       |              |    |  |
|--------------|------------|---------|-------|--------------|----|--|
| RPS24        | ASC IgM    |         |       |              |    |  |
| 5.448632e-55 | 0.9706634  | 0.73    | 0.204 | 9.714367e-51 | 23 |  |
|              | GLRX       | ASC IgM |       |              |    |  |
| 9.773285e-55 | 1.202568   | 0.629   | 0.105 | 1.742479e-50 | 23 |  |
| VPREB3       | ASC IgM    |         |       |              |    |  |
| 1.762767e-54 | 0.9414163  | 0.745   | 0.317 | 3.142837e-50 | 23 |  |
|              | LMAN2      | ASC IgM |       |              |    |  |
| 2.232013e-54 | -0.878702  | 0.976   | 0.99  | 3.979456e-50 | 23 |  |
|              | RPL10A     | ASC IgM |       |              |    |  |
| 2.732475e-53 | -1.137794  | 0.935   | 0.961 | 4.871729e-49 | 23 |  |
|              | RPL23      | ASC IgM |       |              |    |  |
| 2.818453e-53 | -0.6947456 | 1       | 0.996 | 5.025019e-49 | 23 |  |
|              | RPL8       | ASC IgM |       |              |    |  |
| 3.904356e-53 | -1.103223  | 0.961   | 0.981 | 6.961077e-49 | 23 |  |
|              | RPL5       | ASC IgM |       |              |    |  |
| 2.18807e-52  | -0.7012139 | 0.991   | 0.997 | 3.90111e-48  | 23 |  |
|              | RPL28      | ASC IgM |       |              |    |  |
| 2.270534e-52 | 0.7224183  | 0.478   | 0.075 | 4.048135e-48 | 23 |  |
|              | SEC61A1    | ASC IgM |       |              |    |  |
| 2.631347e-52 | 0.8928903  | 0.804   | 0.369 | 4.691429e-48 | 23 |  |
|              | OSTC       | ASC IgM |       |              |    |  |
| 7.548292e-52 | 0.7887122  | 0.51    | 0.091 | 1.345785e-47 | 23 |  |
|              | DNAJC3     | ASC IgM |       |              |    |  |
| 1.905473e-51 | 0.9033832  | 0.872   | 0.554 | 3.397268e-47 | 23 |  |
|              | SERP1      | ASC IgM |       |              |    |  |
| 5.870569e-51 | 0.9893146  | 0.745   | 0.362 | 1.046664e-46 | 23 |  |
|              | PDIA3      | ASC IgM |       |              |    |  |
| 8.343212e-51 | -0.8760099 | 0.988   | 0.993 | 1.487511e-46 | 23 |  |
|              | RPL6       | ASC IgM |       |              |    |  |
| 1.347012e-50 | 0.9062904  | 0.537   | 0.143 | 2.401587e-46 | 23 |  |
|              | PRDX4      | ASC IgM |       |              |    |  |
| 3.270809e-50 | 0.6131809  | 0.353   | 0.034 | 5.831526e-46 | 23 |  |
|              | TRIB1      | ASC IgM |       |              |    |  |
| 3.559642e-50 | 0.8027136  | 0.65    | 0.174 | 6.346485e-46 | 23 |  |
|              | DERL1      | ASC IgM |       |              |    |  |
| 4.897052e-50 | 0.7548655  | 0.786   | 0.39  | 8.730954e-46 | 23 |  |
|              | TMED2      | ASC IgM |       |              |    |  |
| 5.256533e-50 | -0.7983063 | 0.973   | 0.993 | 9.371873e-46 | 23 |  |
|              | RPS7       | ASC IgM |       |              |    |  |
| 1.079938e-49 | 0.6074827  | 0.356   | 0.039 | 1.925422e-45 | 23 |  |
|              | BHLHE41    | ASC IgM |       |              |    |  |
| 5.542157e-49 | -0.9221919 | 0.979   | 0.993 | 9.881112e-45 | 23 |  |
|              | RPS5       | ASC IgM |       |              |    |  |
| 5.965274e-49 | -1.037699  | 0.769   | 0.869 | 1.063549e-44 | 23 |  |
|              | CD52       | ASC IgM |       |              |    |  |
| 7.724598e-49 | -0.917251  | 0.982   | 0.985 | 1.377219e-44 | 23 |  |
|              | RPL27      | ASC IgM |       |              |    |  |
| 2.568695e-48 | 0.7337988  | 0.911   | 0.576 | 4.579726e-44 | 23 |  |
|              | COPE       | ASC IgM |       |              |    |  |
| 3.734155e-48 | 0.7735462  | 0.442   | 0.075 | 6.657625e-44 | 23 |  |

|              |         |         |                |       |       |              |    |
|--------------|---------|---------|----------------|-------|-------|--------------|----|
| 4.437282e-48 | HCST    | ASC IgM | -0.7022095     | 0.982 | 0.994 | 7.911229e-44 | 23 |
| 1.512492e-47 | RPS9    | ASC IgM | -1.4499 0.136  | 0.408 |       | 2.696621e-43 | 23 |
| 2.09599e-47  | SMIM14  | ASC IgM | -0.9327261     | 0.97  | 0.984 | 3.73694e-43  | 23 |
| 2.970615e-47 | RPL29   | ASC IgM | 0.9839077      | 0.754 | 0.3   | 5.29631e-43  | 23 |
| 4.25798e-47  | CD27    | ASC IgM | 0.8515742      | 0.475 | 0.082 | 7.591553e-43 | 23 |
| 6.365411e-47 | RRBP1   | ASC IgM | 0.8913868      | 0.537 | 0.099 | 1.134889e-42 | 23 |
| 8.056662e-47 | SEMA4A  | ASC IgM | 1.247953 0.861 | 0.495 |       | 1.436422e-42 | 23 |
| 1.289109e-46 | SAT1    | ASC IgM | 0.7022125      | 0.917 | 0.602 | 2.298352e-42 | 23 |
| 1.522588e-46 | TMEM258 | ASC IgM | 0.6899786      | 0.507 | 0.129 | 2.714621e-42 | 23 |
| 1.614991e-46 | CYT0R   | ASC IgM | 0.9205388      | 0.706 | 0.214 | 2.879367e-42 | 23 |
| 1.998156e-46 | NANS    | ASC IgM | 0.7850279      | 0.659 | 0.199 | 3.562513e-42 | 23 |
| 2.446571e-46 | SEC13   | ASC IgM | 0.7691787      | 0.875 | 0.466 | 4.361991e-42 | 23 |
| 5.787219e-46 | PRDX5   | ASC IgM | -0.7600417     | 0.994 | 0.998 | 1.031803e-41 | 23 |
| 1.333638e-45 | RPS28   | ASC IgM | 0.965393 0.742 | 0.198 |       | 2.377742e-41 | 23 |
| 2.275975e-45 | HMCES   | ASC IgM | -0.7169361     | 0.991 | 0.998 | 4.057835e-41 | 23 |
| 3.601149e-45 | RPL3    | ASC IgM | -0.8334323     | 0.979 | 0.992 | 6.420489e-41 | 23 |
| 6.508053e-45 | RPL18   | ASC IgM | 0.337634 0.142 | 0.003 |       | 1.160321e-40 | 23 |
| 8.308203e-45 | CTHRC1  | ASC IgM | -0.9496122     | 0.944 | 0.971 | 1.48127e-40  | 23 |
| 8.424692e-45 | RPL22   | ASC IgM | -0.8261729     | 0.988 | 0.991 | 1.502038e-40 | 23 |
| 1.278438e-44 | RPS16   | ASC IgM | -1.599329      | 0.297 | 0.49  | 2.279326e-40 | 23 |
| 2.201204e-44 | LTB     | ASC IgM | 0.6977872      | 0.519 | 0.127 | 3.924526e-40 | 23 |
| 4.580031e-44 | SRPRB   | ASC IgM | -1.534637      | 0.226 | 0.525 | 8.165738e-40 | 23 |
| 5.422397e-44 | ID3     | ASC IgM | 0.6827957      | 0.439 | 0.063 | 9.667592e-40 | 23 |
| 1.187438e-43 | QPCT    | ASC IgM | 0.4976536      | 0.3   | 0.026 | 2.117084e-39 | 23 |
| 1.192209e-43 | KCNN3   | ASC IgM | 0.671688 0.487 | 0.082 |       | 2.125589e-39 | 23 |

|              |                |       |              |              |    |  |
|--------------|----------------|-------|--------------|--------------|----|--|
| ST6GALNAC4   | ASC IgM        |       |              |              |    |  |
| 1.255494e-42 | -1.474036      | 0.264 | 0.514        | 2.238421e-38 | 23 |  |
| BANK1        | ASC IgM        |       |              |              |    |  |
| 2.342447e-42 | 0.9097854      | 0.65  | 0.2          | 4.176348e-38 | 23 |  |
| UBALD2       | ASC IgM        |       |              |              |    |  |
| 3.134519e-42 | -1.057647      | 0.958 | 0.965        | 5.588535e-38 | 23 |  |
| RPL38        | ASC IgM        |       |              |              |    |  |
| 5.526484e-42 | -1.354464      | 0.332 | 0.572        | 9.853168e-38 | 23 |  |
| SNX2         | ASC IgM        |       |              |              |    |  |
| 7.28891e-42  | -1.19349 0.964 | 0.977 | 1.29954e-37  | 23           |    |  |
| RPS10        | ASC IgM        |       |              |              |    |  |
| 7.989299e-42 | -1.102111      | 0.89  | 0.932        | 1.424412e-37 | 23 |  |
| HMGB1        | ASC IgM        |       |              |              |    |  |
| 2.250014e-41 | 0.6902469      | 0.632 | 0.204        | 4.01155e-37  | 23 |  |
| TMEM208      | ASC IgM        |       |              |              |    |  |
| 3.549542e-41 | -1.327823      | 0.134 | 0.426        | 6.328479e-37 | 23 |  |
| DEK          | ASC IgM        |       |              |              |    |  |
| 1.003891e-40 | 0.7431247      | 0.656 | 0.22         | 1.789837e-36 | 23 |  |
| SSR1         | ASC IgM        |       |              |              |    |  |
| 2.214923e-40 | 0.3820384      | 0.142 | 0.003        | 3.948987e-36 | 23 |  |
| LINC01485    | ASC IgM        |       |              |              |    |  |
| 2.2657e-40   | 0.6597297      | 0.769 | 0.303        | 4.039516e-36 | 23 |  |
| CNPY2        | ASC IgM        |       |              |              |    |  |
| 3.85165e-40  | 0.6607266      | 0.496 | 0.114        | 6.867108e-36 | 23 |  |
| DNAJC1       | ASC IgM        |       |              |              |    |  |
| 3.925712e-40 | 0.5887233      | 0.454 | 0.088        | 6.999152e-36 | 23 |  |
| UBA5         | ASC IgM        |       |              |              |    |  |
| 4.257091e-40 | 0.563154 0.356 | 0.038 | 7.589967e-36 | 23           |    |  |
| CKAP4        | ASC IgM        |       |              |              |    |  |
| 5.015879e-40 | -0.5596834     | 0.988 | 0.997        | 8.94281e-36  | 23 |  |
| RPS4X        | ASC IgM        |       |              |              |    |  |
| 1.179797e-39 | 0.5210996      | 0.982 | 0.864        | 2.10346e-35  | 23 |  |
| RPL36AL      | ASC IgM        |       |              |              |    |  |
| 1.254643e-39 | -1.168052      | 0.647 | 0.778        | 2.236903e-35 | 23 |  |
| NAP1L1       | ASC IgM        |       |              |              |    |  |
| 1.923812e-39 | 0.7029849      | 0.846 | 0.428        | 3.429965e-35 | 23 |  |
| ZNF706       | ASC IgM        |       |              |              |    |  |
| 2.584223e-39 | 0.7432178      | 0.22  | 0.027        | 4.607411e-35 | 23 |  |
| DUSP4        | ASC IgM        |       |              |              |    |  |
| 7.605475e-39 | 0.6111608      | 0.564 | 0.151        | 1.35598e-34  | 23 |  |
| ALG5         | ASC IgM        |       |              |              |    |  |
| 1.360956e-38 | 0.7229871      | 0.359 | 0.043        | 2.426448e-34 | 23 |  |
| EML6         | ASC IgM        |       |              |              |    |  |
| 2.117239e-38 | 0.760664 0.766 | 0.312 | 3.774825e-34 | 23           |    |  |
| NDUFAF3      | ASC IgM        |       |              |              |    |  |
| 2.198095e-38 | -1.305843      | 0.875 | 0.917        | 3.918984e-34 | 23 |  |
| EEF1B2       | ASC IgM        |       |              |              |    |  |
| 2.427839e-38 | -0.9956865     | 0.964 | 0.969        | 4.328594e-34 | 23 |  |
| MT-ND3       | ASC IgM        |       |              |              |    |  |
| 4.187839e-38 | 0.6238497      | 0.718 | 0.291        | 7.466498e-34 | 23 |  |

|              |            |         |            |       |       |              |    |
|--------------|------------|---------|------------|-------|-------|--------------|----|
| 5.381051e-38 | ACADVL     | ASC IgM | -1.073935  | 0.727 | 0.815 | 9.593876e-34 | 23 |
| 5.468006e-38 | COR01A     | ASC IgM | -0.9740581 | 0.932 | 0.946 | 9.748909e-34 | 23 |
| 6.233394e-38 | HLA-DRA    | ASC IgM | 0.6204726  | 0.522 | 0.11  | 1.111352e-33 | 23 |
| 7.47535e-38  | PREB       | ASC IgM | 0.5026003  | 0.323 | 0.04  | 1.33278e-33  | 23 |
| 2.044433e-37 | IQGAP2     | ASC IgM | 0.5439184  | 0.32  | 0.033 | 3.645019e-33 | 23 |
| 2.052489e-37 | SEC24D     | ASC IgM | 0.5941712  | 0.323 | 0.036 | 3.659383e-33 | 23 |
| 2.151238e-37 | AC012236.1 | ASC IgM | 0.5670498  | 0.49  | 0.113 | 3.835442e-33 | 23 |
| 2.429681e-37 | SURF4      | ASC IgM | 0.5334451  | 0.341 | 0.038 | 4.331878e-33 | 23 |
| 6.242411e-37 | CPEB4      | ASC IgM | 0.8119301  | 0.362 | 0.045 | 1.112959e-32 | 23 |
| 7.36341e-37  | COL9A3     | ASC IgM | 0.6594361  | 0.591 | 0.181 | 1.312822e-32 | 23 |
| 1.405395e-36 | LRRC59     | ASC IgM | 0.496214   | 0.338 | 0.042 | 2.505679e-32 | 23 |
| 3.358473e-36 | SIL1       | ASC IgM | 0.6427238  | 0.62  | 0.204 | 5.987822e-32 | 23 |
| 5.852107e-36 | SND1       | ASC IgM | -1.121147  | 0.175 | 0.395 | 1.043372e-31 | 23 |
| 8.218344e-36 | SYPL1      | ASC IgM | 0.605081   | 0.243 | 0.026 | 1.465249e-31 | 23 |
| 9.990773e-36 | FEZ1       | ASC IgM | 0.5996775  | 0.896 | 0.651 | 1.781255e-31 | 23 |
| 1.054194e-35 | TMBIM6     | ASC IgM | 0.6789161  | 0.315 | 0.042 | 1.879522e-31 | 23 |
| 1.390313e-35 | GADD45A    | ASC IgM | 0.6099489  | 0.448 | 0.101 | 2.47879e-31  | 23 |
| 1.614151e-35 | SLC35B1    | ASC IgM | 0.465252   | 0.291 | 0.023 | 2.87787e-31  | 23 |
| 1.661494e-35 | ZBP1       | ASC IgM | 0.5866839  | 0.507 | 0.124 | 2.962278e-31 | 23 |
| 7.291339e-35 | SAR1B      | ASC IgM | 0.6940554  | 0.522 | 0.12  | 1.299973e-30 | 23 |
| 7.434969e-35 | SPATS2     | ASC IgM | -1.381529  | 0.409 | 0.611 | 1.325581e-30 | 23 |
| 1.286734e-34 | SYNGR2     | ASC IgM | -0.83707   | 0.961 | 0.976 | 2.294119e-30 | 23 |
| 2.906637e-34 | UBA52      | ASC IgM | 0.7361467  | 0.917 | 0.597 | 5.182243e-30 | 23 |
| 4.12757e-34  | PRDX1      | ASC IgM | -0.4312464 | 0.994 | 0.999 | 7.359045e-30 | 23 |
| 9.62786e-34  | RPL10      | ASC IgM | 0.4033196  | 0.237 | 0.018 | 1.716551e-29 | 23 |



|              |         |         |                |       |              |              |    |
|--------------|---------|---------|----------------|-------|--------------|--------------|----|
| 1.02534e-33  | ELL2    | ASC IgM | 0.7081728      | 0.582 | 0.165        | 1.828078e-29 | 23 |
| 1.064479e-33 | CCDC167 | ASC IgM | 0.5365088      | 0.226 | 0.017        | 1.897859e-29 | 23 |
| 1.129255e-33 | ZNF804A | ASC IgM | 0.5761024      | 0.478 | 0.104        | 2.013348e-29 | 23 |
| 3.149676e-33 | TXNDC15 | ASC IgM | -1.21372 0.101 | 0.339 | 5.615557e-29 | 23           |    |
| 3.161293e-33 | HVCN1   | ASC IgM | 0.7000798      | 0.534 | 0.124        | 5.636269e-29 | 23 |
| 3.45231e-33  | MSI2    | ASC IgM | 0.6797598      | 0.62  | 0.19         | 6.155124e-29 | 23 |
| 8.788052e-33 | REPIN1  | ASC IgM | 0.4578891      | 0.332 | 0.042        | 1.566822e-28 | 23 |
| 9.681806e-33 | KCNK6   | ASC IgM | 0.6230168      | 0.893 | 0.564        | 1.726169e-28 | 23 |
| 1.23852e-32  | UQCRQ   | ASC IgM | 0.5209011      | 0.323 | 0.04         | 2.208157e-28 | 23 |
| 1.2448e-32   | CREB3L2 | ASC IgM | 0.5763868      | 0.383 | 0.061        | 2.219354e-28 | 23 |
| 1.284477e-32 | ITPR2   | ASC IgM | 0.5034415      | 0.472 | 0.095        | 2.290094e-28 | 23 |
| 1.488623e-32 | TMED5   | ASC IgM | 0.573964 0.807 | 0.398 | 2.654065e-28 | 23           |    |
| 1.633058e-32 | UBXN4   | ASC IgM | 0.3522713      | 0.231 | 0.019        | 2.911579e-28 | 23 |
| 2.045442e-32 | NT5DC2  | ASC IgM | -0.923017      | 0.045 | 0.258        | 3.646818e-28 | 23 |
| 2.066822e-32 | LYSMD2  | ASC IgM | 0.6373871      | 0.558 | 0.167        | 3.684938e-28 | 23 |
| 2.195263e-32 | SRP68   | ASC IgM | 0.5365711      | 0.445 | 0.094        | 3.913934e-28 | 23 |
| 4.382949e-32 | RPN1    | ASC IgM | 0.5878252      | 0.659 | 0.233        | 7.814359e-28 | 23 |
| 4.7176e-32   | LRPAP1  | ASC IgM | 0.591792 0.641 | 0.227 | 8.411009e-28 | 23           |    |
| 5.386373e-32 | UFM1    | ASC IgM | 0.604056 0.57  | 0.17  | 9.603364e-28 | 23           |    |
| 6.510291e-32 | GORASP2 | ASC IgM | 0.7916083      | 0.979 | 0.963        | 1.16072e-27  | 23 |
| 1.348788e-31 | FTL     | ASC IgM | -0.9904182     | 0.071 | 0.295        | 2.404754e-27 | 23 |
| 1.461589e-31 | BCL11A  | ASC IgM | 0.6139542      | 0.552 | 0.163        | 2.605866e-27 | 23 |
| 1.893351e-31 | MLEC    | ASC IgM | 0.5413666      | 0.341 | 0.051        | 3.375656e-27 | 23 |
| 2.875837e-31 | MEI1    | ASC IgM | 1.190846 0.504 | 0.149 | 5.12733e-27  | 23           |    |
| 3.284169e-31 | DUSP2   | ASC IgM | 3.278607 0.917 | 0.643 | 5.855346e-27 | 23           |    |

|              |           |                |       |       |              |    |
|--------------|-----------|----------------|-------|-------|--------------|----|
| IGLC2        | ASC IgM   |                |       |       |              |    |
| 3.618854e-31 |           | -0.6575091     | 0.982 | 0.988 | 6.452054e-27 | 23 |
|              | RACK1     | ASC IgM        |       |       |              |    |
| 7.85658e-31  |           | 0.5409391      | 0.415 | 0.07  | 1.40075e-26  | 23 |
|              | CHST12    | ASC IgM        |       |       |              |    |
| 1.03119e-30  |           | -0.8395427     | 0.979 | 0.98  | 1.838509e-26 | 23 |
|              | RPL7A     | ASC IgM        |       |       |              |    |
| 1.344779e-30 |           | 0.6127374      | 0.941 | 0.728 | 2.397607e-26 | 23 |
|              | OST4      | ASC IgM        |       |       |              |    |
| 1.378807e-30 |           | 0.7651988      | 0.84  | 0.372 | 2.458276e-26 | 23 |
|              | ACADM     | ASC IgM        |       |       |              |    |
| 3.198574e-30 |           | 0.6085567      | 0.617 | 0.219 | 5.702738e-26 | 23 |
|              | COPB2     | ASC IgM        |       |       |              |    |
| 3.440432e-30 |           | -1.49222 0.493 | 0.699 |       | 6.133946e-26 | 23 |
| EMP3         | ASC IgM   |                |       |       |              |    |
| 5.535762e-30 |           | -1.195592      | 0.243 | 0.373 | 9.869711e-26 | 23 |
|              | SELL      | ASC IgM        |       |       |              |    |
| 5.838359e-30 |           | -1.119377      | 0.086 | 0.298 | 1.040921e-25 | 23 |
|              | LINC00926 | ASC IgM        |       |       |              |    |
| 6.000729e-30 |           | 0.3162679      | 0.131 | 0.005 | 1.06987e-25  | 23 |
|              | IL17RB    | ASC IgM        |       |       |              |    |
| 7.420224e-30 |           | 0.5429469      | 0.439 | 0.098 | 1.322952e-25 | 23 |
|              | CTSD      | ASC IgM        |       |       |              |    |
| 8.461742e-30 |           | 0.6442194      | 0.543 | 0.156 | 1.508644e-25 | 23 |
|              | IL10RA    | ASC IgM        |       |       |              |    |
| 1.286683e-29 |           | 0.596634 0.783 | 0.378 |       | 2.294027e-25 | 23 |
| NDUFC2       | ASC IgM   |                |       |       |              |    |
| 1.545502e-29 |           | 0.5757549      | 0.614 | 0.206 | 2.755475e-25 | 23 |
|              | CISD2     | ASC IgM        |       |       |              |    |
| 1.547157e-29 |           | -1.031498      | 0.202 | 0.431 | 2.758425e-25 | 23 |
|              | IRF8      | ASC IgM        |       |       |              |    |
| 3.66518e-29  |           | 0.4517201      | 0.365 | 0.056 | 6.53465e-25  | 23 |
|              | GMPPA     | ASC IgM        |       |       |              |    |
| 6.321157e-29 |           | -0.7789404     | 0.516 | 0.626 | 1.126999e-24 | 23 |
|              | HLA-DMB   | ASC IgM        |       |       |              |    |
| 8.49556e-29  |           | 0.3932389      | 0.252 | 0.04  | 1.514673e-24 | 23 |
|              | PKHD1L1   | ASC IgM        |       |       |              |    |
| 1.243179e-28 |           | 0.6412416      | 0.614 | 0.165 | 2.216465e-24 | 23 |
|              | SEL1L3    | ASC IgM        |       |       |              |    |
| 2.689801e-28 |           | 0.4692596      | 0.368 | 0.063 | 4.795646e-24 | 23 |
|              | CALU      | ASC IgM        |       |       |              |    |
| 2.743882e-28 |           | -1.365586      | 0.632 | 0.717 | 4.892067e-24 | 23 |
|              | HMG2      | ASC IgM        |       |       |              |    |
| 3.03451e-28  |           | 0.5858471      | 0.789 | 0.405 | 5.410227e-24 | 23 |
|              | GUK1      | ASC IgM        |       |       |              |    |
| 3.132206e-28 |           | 0.4792682      | 0.288 | 0.039 | 5.584411e-24 | 23 |
|              | SELENOM   | ASC IgM        |       |       |              |    |
| 3.359557e-28 |           | -0.9625033     | 0.267 | 0.435 | 5.989753e-24 | 23 |
|              | CYB561A3  | ASC IgM        |       |       |              |    |
| 4.035549e-28 |           | 0.5685232      | 0.733 | 0.328 | 7.194981e-24 | 23 |

|              |         |         |            |       |       |              |    |
|--------------|---------|---------|------------|-------|-------|--------------|----|
| 5.981576e-28 | COPZ1   | ASC IgM | 0.8094714  | 0.309 | 0.073 | 1.066455e-23 | 23 |
| 5.998143e-28 | H1FX    | ASC IgM | 0.5819582  | 0.599 | 0.227 | 1.069409e-23 | 23 |
| 7.544776e-28 | DDOST   | ASC IgM | 0.5332204  | 0.95  | 0.705 | 1.345158e-23 | 23 |
| 9.39753e-28  | COX7A2  | ASC IgM | 0.4485528  | 0.472 | 0.118 | 1.675486e-23 | 23 |
| 1.263766e-27 | NEU1    | ASC IgM | 2.222715   | 0.543 | 0.428 | 2.253168e-23 | 23 |
| 1.607416e-27 | IGLC3   | ASC IgM | 0.4277775  | 0.243 | 0.034 | 2.865862e-23 | 23 |
| 2.183099e-27 | SLC04A1 | ASC IgM | 1.283998   | 0.234 | 0.05  | 3.892247e-23 | 23 |
| 3.051611e-27 | CCL3    | ASC IgM | 0.309268   | 0.136 | 0.008 | 5.440717e-23 | 23 |
| 3.165039e-27 | CADM1   | ASC IgM | 0.5295492  | 0.95  | 0.705 | 5.642948e-23 | 23 |
| 5.01522e-27  | NDUFA4  | ASC IgM | 0.4540642  | 0.418 | 0.099 | 8.941635e-23 | 23 |
| 5.091046e-27 | HDLBP   | ASC IgM | 0.4799005  | 0.418 | 0.076 | 9.076826e-23 | 23 |
| 5.219045e-27 | COPG1   | ASC IgM | -0.7226655 | 0.97  | 0.982 | 9.305035e-23 | 23 |
| 7.528105e-27 | RPS11   | ASC IgM | 0.5219209  | 0.57  | 0.176 | 1.342186e-22 | 23 |
| 7.853617e-27 | MESD    | ASC IgM | 0.4989259  | 0.558 | 0.169 | 1.400221e-22 | 23 |
| 8.992236e-27 | SRPRA   | ASC IgM | 0.5722813  | 0.662 | 0.236 | 1.603226e-22 | 23 |
| 9.146061e-27 | ZBTB80S | ASC IgM | 0.5441536  | 0.608 | 0.237 | 1.630651e-22 | 23 |
| 9.854602e-27 | MORF4L2 | ASC IgM | -0.7965824 | 0.039 | 0.196 | 1.756977e-22 | 23 |
| 1.160181e-26 | FAM129C | ASC IgM | 0.3765317  | 0.383 | 0.093 | 2.068487e-22 | 23 |
| 1.390145e-26 | KLK1    | ASC IgM | 0.5597204  | 0.421 | 0.087 | 2.47849e-22  | 23 |
| 1.52632e-26  | ABHD3   | ASC IgM | -0.978972  | 0.264 | 0.404 | 2.721276e-22 | 23 |
| 1.989252e-26 | STX7    | ASC IgM | 0.5163489  | 0.516 | 0.14  | 3.546638e-22 | 23 |
| 2.091595e-26 | USP48   | ASC IgM | -0.7944429 | 0.953 | 0.957 | 3.729106e-22 | 23 |
| 2.362693e-26 | PABPC1  | ASC IgM | 0.4294115  | 0.291 | 0.039 | 4.212446e-22 | 23 |
| 2.781891e-26 | DENND6B | ASC IgM | -0.9210503 | 0.92  | 0.927 | 4.959833e-22 | 23 |
| 3.18891e-26  | HNRNPA1 | ASC IgM | 0.3000897  | 0.187 | 0.015 | 5.685508e-22 | 23 |

|              |             |         |                |       |       |              |    |
|--------------|-------------|---------|----------------|-------|-------|--------------|----|
| 4.255304e-26 | ZNF215      | ASC IgM | 0.4610859      | 0.418 | 0.094 | 7.586782e-22 | 23 |
| 4.598961e-26 | SEC23B      | ASC IgM | 0.5493425      | 0.801 | 0.449 | 8.199487e-22 | 23 |
| 4.694952e-26 | VCP         | ASC IgM | -0.6870419     | 0.982 | 0.985 | 8.37063e-22  | 23 |
| 4.840163e-26 | TMSB10      | ASC IgM | 0.6831284      | 0.659 | 0.223 | 8.629527e-22 | 23 |
| 5.031944e-26 | UBE2G1      | ASC IgM | 0.3630902      | 0.157 | 0.01  | 8.971453e-22 | 23 |
| 6.923779e-26 | IGHV1-69D   | ASC IgM | 0.3896567      | 0.223 | 0.019 | 1.234441e-21 | 23 |
| 8.414517e-26 | AEBP1       | ASC IgM | -0.7953381     | 0.973 | 0.957 | 1.500224e-21 | 23 |
| 9.857036e-26 | RPL24       | ASC IgM | 0.7891745      | 0.976 | 0.904 | 1.757411e-21 | 23 |
| 1.09587e-25  | HLA-A       | ASC IgM | 0.5235147      | 0.481 | 0.139 | 1.953827e-21 | 23 |
| 1.211335e-25 | ARMCX3      | ASC IgM | 0.3726975      | 0.228 | 0.025 | 2.159689e-21 | 23 |
| 1.563573e-25 | MIR4435-2HG | ASC IgM | 0.44191 0.371  | 0.066 |       | 2.787694e-21 | 23 |
| 1.96546e-25  | THEMIS2     | ASC IgM | 0.375016 0.249 | 0.025 |       | 3.504219e-21 | 23 |
| 2.173109e-25 | LAX1        | ASC IgM | -0.854771      | 0.181 | 0.339 | 3.874436e-21 | 23 |
| 2.304478e-25 | SPIB        | ASC IgM | 0.499268 0.893 | 0.557 |       | 4.108654e-21 | 23 |
| 2.331114e-25 | ATP5PF      | ASC IgM | 0.4683881      | 0.318 | 0.053 | 4.156144e-21 | 23 |
| 2.470945e-25 | SEL1L       | ASC IgM | 0.4355921      | 0.264 | 0.042 | 4.405448e-21 | 23 |
| 2.477794e-25 | IRF4        | ASC IgM | 0.506352 0.546 | 0.159 |       | 4.417659e-21 | 23 |
| 4.014277e-25 | ST6GAL1     | ASC IgM | 0.6770774      | 0.436 | 0.122 | 7.157055e-21 | 23 |
| 4.979622e-25 | DLAT        | ASC IgM | -0.8804192     | 0.092 | 0.268 | 8.878168e-21 | 23 |
| 5.076104e-25 | HHEX        | ASC IgM | 0.5094131      | 0.442 | 0.108 | 9.050186e-21 | 23 |
| 5.229283e-25 | STT3B       | ASC IgM | 0.4119578      | 0.19  | 0.026 | 9.323288e-21 | 23 |
| 6.927482e-25 | BEX5        | ASC IgM | 0.4734108      | 0.54  | 0.17  | 1.235101e-20 | 23 |
| 7.05621e-25  | EMC7        | ASC IgM | -0.8984339     | 0.062 | 0.212 | 1.258052e-20 | 23 |
| 8.624027e-25 | PLAC8       | ASC IgM | 0.4540257      | 0.383 | 0.072 | 1.537578e-20 | 23 |
| 1.005879e-24 | EDEM2       | ASC IgM | 0.4398879      | 0.65  | 0.277 | 1.793382e-20 | 23 |

|              |            |       |       |              |              |    |
|--------------|------------|-------|-------|--------------|--------------|----|
| SRM          | ASC IgM    |       |       |              |              |    |
| 1.182215e-24 | 0.611154   | 0.763 | 0.355 | 2.107771e-20 | 23           |    |
| TMEM243      | ASC IgM    |       |       |              |              |    |
| 1.246497e-24 | 0.5128153  |       | 0.641 | 0.24         | 2.222379e-20 | 23 |
| OS9          | ASC IgM    |       |       |              |              |    |
| 1.39666e-24  | -1.519402  |       | 0.626 | 0.666        | 2.490105e-20 | 23 |
| TUBA1B       | ASC IgM    |       |       |              |              |    |
| 1.427249e-24 | 0.524302   | 0.579 | 0.213 | 2.544642e-20 | 23           |    |
| RAB1A        | ASC IgM    |       |       |              |              |    |
| 1.842233e-24 | 0.3771049  |       | 0.341 | 0.061        | 3.284516e-20 | 23 |
| LARP1B       | ASC IgM    |       |       |              |              |    |
| 2.209783e-24 | 0.3210451  |       | 0.243 | 0.028        | 3.939823e-20 | 23 |
| HSPA13       | ASC IgM    |       |       |              |              |    |
| 2.718396e-24 | -0.6845967 |       | 0.694 | 0.725        | 4.846628e-20 | 23 |
| LIMD2        | ASC IgM    |       |       |              |              |    |
| 3.149521e-24 | 0.5828937  |       | 0.54  | 0.184        | 5.615281e-20 | 23 |
| REX02        | ASC IgM    |       |       |              |              |    |
| 3.403901e-24 | -0.5703476 |       | 0.537 | 0.656        | 6.068815e-20 | 23 |
| TCL1A        | ASC IgM    |       |       |              |              |    |
| 3.588511e-24 | 0.7219261  |       | 0.632 | 0.204        | 6.397956e-20 | 23 |
| EAF2         | ASC IgM    |       |       |              |              |    |
| 4.514323e-24 | 0.3187725  |       | 0.315 | 0.075        | 8.048586e-20 | 23 |
| SLAMF7       | ASC IgM    |       |       |              |              |    |
| 4.527106e-24 | 0.3825877  |       | 0.297 | 0.041        | 8.071378e-20 | 23 |
| FNDC3A       | ASC IgM    |       |       |              |              |    |
| 8.678342e-24 | 0.4079944  |       | 0.261 | 0.039        | 1.547262e-19 | 23 |
| SLC17A9      | ASC IgM    |       |       |              |              |    |
| 8.868649e-24 | -0.9869266 |       | 0.407 | 0.489        | 1.581191e-19 | 23 |
| UCP2         | ASC IgM    |       |       |              |              |    |
| 8.951658e-24 | 0.4605958  |       | 0.525 | 0.166        | 1.595991e-19 | 23 |
| ARL1         | ASC IgM    |       |       |              |              |    |
| 9.002945e-24 | 0.555217   | 0.694 | 0.298 | 1.605135e-19 | 23           |    |
| CDK2AP2      | ASC IgM    |       |       |              |              |    |
| 9.008337e-24 | 0.5630023  |       | 0.614 | 0.224        | 1.606096e-19 | 23 |
| ADI1         | ASC IgM    |       |       |              |              |    |
| 9.461484e-24 | -0.7771479 |       | 0.033 | 0.175        | 1.686888e-19 | 23 |
| MARCH1       | ASC IgM    |       |       |              |              |    |
| 9.686928e-24 | 0.4764119  |       | 0.739 | 0.381        | 1.727082e-19 | 23 |
| ATP6V0B      | ASC IgM    |       |       |              |              |    |
| 1.004757e-23 | 0.4760658  |       | 0.513 | 0.174        | 1.791381e-19 | 23 |
| DERL2        | ASC IgM    |       |       |              |              |    |
| 1.068001e-23 | 0.6284857  |       | 0.718 | 0.32         | 1.904138e-19 | 23 |
| HSBP1        | ASC IgM    |       |       |              |              |    |
| 1.242964e-23 | 0.574074   | 0.531 | 0.173 | 2.21608e-19  | 23           |    |
| EHMT1        | ASC IgM    |       |       |              |              |    |
| 1.587579e-23 | 0.3862937  |       | 0.332 | 0.063        | 2.830495e-19 | 23 |
| SLC39A7      | ASC IgM    |       |       |              |              |    |
| 1.872301e-23 | 0.4502114  |       | 0.439 | 0.121        | 3.338126e-19 | 23 |
| PIGT         | ASC IgM    |       |       |              |              |    |
| 2.321575e-23 | -0.943168  |       | 0.089 | 0.253        | 4.139135e-19 | 23 |

|              |            |       |       |              |              |     |
|--------------|------------|-------|-------|--------------|--------------|-----|
| FCMR         | ASC IgM    |       |       |              |              |     |
| 2.670337e-23 | 0.753007   | 0.872 | 0.531 | 4.760944e-19 | 23           |     |
| ISG20        | ASC IgM    |       |       |              |              |     |
| 2.708845e-23 | 0.4742036  |       | 0.585 | 0.224        | 4.8296e-19   | 23  |
| TIMM17A      | ASC IgM    |       |       |              |              |     |
| 2.990026e-23 | 0.4741142  |       | 0.953 | 0.742        | 5.330916e-19 | 23  |
| CHCHD2       | ASC IgM    |       |       |              |              |     |
| 3.03278e-23  | 0.6484069  |       | 0.635 | 0.342        | 5.407144e-19 | 23  |
| INSIG1       | ASC IgM    |       |       |              |              |     |
| 3.313467e-23 | 0.4612544  |       | 0.697 | 0.31         | 5.90758e-19  | 23  |
| AKR1A1       | ASC IgM    |       |       |              |              |     |
| 4.235083e-23 | 0.5680105  |       | 0.261 | 0.045        | 7.55073e-19  | 23  |
| ALDH5A1      | ASC IgM    |       |       |              |              |     |
| 5.67006e-23  | -1.013323  |       | 0.326 | 0.477        | 1.010915e-18 | 23  |
| TNFAIP8      | ASC IgM    |       |       |              |              |     |
| 5.736406e-23 | -1.194079  |       | 0.136 | 0.354        | 1.022744e-18 | 23  |
| TXNIP        | ASC IgM    |       |       |              |              |     |
| 6.497034e-23 | 0.368455   | 0.208 | 0.021 | 1.158356e-18 | 23           | SPN |
| ASC IgM      |            |       |       |              |              |     |
| 6.541718e-23 | 0.4523975  |       | 0.742 | 0.384        | 1.166323e-18 | 23  |
| PSAP         | ASC IgM    |       |       |              |              |     |
| 6.610206e-23 | -1.033099  |       | 0.294 | 0.438        | 1.178534e-18 | 23  |
| COTL1        | ASC IgM    |       |       |              |              |     |
| 7.554462e-23 | -0.7892001 |       | 0.929 | 0.923        | 1.346885e-18 | 23  |
| BTF3         | ASC IgM    |       |       |              |              |     |
| 8.806616e-23 | 0.3952606  |       | 0.234 | 0.036        | 1.570132e-18 | 23  |
| PRDM15       | ASC IgM    |       |       |              |              |     |
| 9.674869e-23 | 0.5531879  |       | 0.329 | 0.072        | 1.724932e-18 | 23  |
| NUCB2        | ASC IgM    |       |       |              |              |     |
| 9.938927e-23 | 0.4357646  |       | 0.54  | 0.171        | 1.772011e-18 | 23  |
| ERGIC2       | ASC IgM    |       |       |              |              |     |
| 1.208945e-22 | 0.3617927  |       | 0.255 | 0.029        | 2.155427e-18 | 23  |
| GLCCI1       | ASC IgM    |       |       |              |              |     |
| 2.162398e-22 | 0.4059515  |       | 0.24  | 0.035        | 3.855339e-18 | 23  |
| ZFAT         | ASC IgM    |       |       |              |              |     |
| 3.558971e-22 | 0.3272782  |       | 0.184 | 0.017        | 6.345289e-18 | 23  |
| TRAM2        | ASC IgM    |       |       |              |              |     |
| 3.862598e-22 | 0.471952   | 0.855 | 0.432 | 6.886626e-18 | 23           |     |
| ROMO1        | ASC IgM    |       |       |              |              |     |
| 6.890624e-22 | -0.9274904 |       | 0.549 | 0.62         | 1.228529e-17 | 23  |
| IFI16        | ASC IgM    |       |       |              |              |     |
| 1.013761e-21 | 0.4401487  |       | 0.593 | 0.205        | 1.807434e-17 | 23  |
| GNL3         | ASC IgM    |       |       |              |              |     |
| 1.770708e-21 | 0.3634271  |       | 0.377 | 0.085        | 3.156995e-17 | 23  |
| TENT5C       | ASC IgM    |       |       |              |              |     |
| 1.803049e-21 | 0.4078455  |       | 0.309 | 0.064        | 3.214656e-17 | 23  |
| MAGT1        | ASC IgM    |       |       |              |              |     |
| 2.39546e-21  | 0.4812299  |       | 0.668 | 0.316        | 4.270865e-17 | 23  |
| PRDX2        | ASC IgM    |       |       |              |              |     |
| 3.5916e-21   | 0.3617425  |       | 0.303 | 0.062        | 6.403464e-17 | 23  |

|              |                  |            |       |       |              |    |
|--------------|------------------|------------|-------|-------|--------------|----|
| 3.700614e-21 | SLC39A8 ASC IgM  | 0.3836545  | 0.846 | 0.491 | 6.597825e-17 | 23 |
| 4.712546e-21 | ARF1 ASC IgM     | 0.384319   | 0.152 | 0.499 | 8.401998e-17 | 23 |
| 6.291214e-21 | ARFGAP3 ASC IgM  | 0.4276835  | 0.537 | 0.178 | 1.121661e-16 | 23 |
| 6.466558e-21 | NUDT22 ASC IgM   | 0.4010209  | 0.552 | 0.214 | 1.152923e-16 | 23 |
| 6.740456e-21 | CANX ASC IgM     | -0.8831445 | 0.151 | 0.307 | 1.201756e-16 | 23 |
| 6.85894e-21  | ARHGAP24 ASC IgM | 0.4944459  | 0.54  | 0.18  | 1.22288e-16  | 23 |
| 8.243807e-21 | TRABD ASC IgM    | 0.4393095  | 0.534 | 0.182 | 1.469788e-16 | 23 |
| 8.79202e-21  | NAPA ASC IgM     | -0.9577494 | 0.148 | 0.321 | 1.567529e-16 | 23 |
| 1.22785e-20  | TUBA1A ASC IgM   | -0.9776887 | 0.519 | 0.648 | 2.189134e-16 | 23 |
| 1.348153e-20 | ZFAS1 ASC IgM    | -0.8258986 | 0.166 | 0.319 | 2.403623e-16 | 23 |
| 1.60341e-20  | FCRLA ASC IgM    | 0.5241356  | 0.412 | 0.11  | 2.85872e-16  | 23 |
| 1.723059e-20 | BRI3BP ASC IgM   | 0.3703382  | 0.855 | 0.507 | 3.072041e-16 | 23 |
| 1.820739e-20 | PSMD8 ASC IgM    | 0.3639793  | 0.504 | 0.183 | 3.246196e-16 | 23 |
| 1.945374e-20 | YIF1A ASC IgM    | 0.4849292  | 0.412 | 0.098 | 3.468407e-16 | 23 |
| 2.09034e-20  | PTPN7 ASC IgM    | 0.4342143  | 0.579 | 0.22  | 3.726867e-16 | 23 |
| 2.163951e-20 | SRP54 ASC IgM    | 0.4419047  | 0.528 | 0.17  | 3.858109e-16 | 23 |
| 2.26728e-20  | SEC63 ASC IgM    | -0.8373232 | 0.279 | 0.417 | 4.042334e-16 | 23 |
| 3.077692e-20 | ESD ASC IgM      | 0.5369683  | 0.754 | 0.325 | 5.487216e-16 | 23 |
| 3.33815e-20  | GYPC ASC IgM     | -0.712001  | 0.074 | 0.22  | 5.951588e-16 | 23 |
| 6.896465e-20 | LY86 ASC IgM     | 0.3907141  | 0.493 | 0.165 | 1.229571e-15 | 23 |
| 6.897774e-20 | SAR1A ASC IgM    | -1.228046  | 0.38  | 0.572 | 1.229804e-15 | 23 |
| 7.571409e-20 | VIM ASC IgM      | 0.4173717  | 0.579 | 0.227 | 1.349906e-15 | 23 |
| 8.118527e-20 | CCNC ASC IgM     | -0.6848501 | 0.988 | 0.988 | 1.447452e-15 | 23 |
| 1.017706e-19 | RPLP0 ASC IgM    | 0.3741523  | 0.392 | 0.118 | 1.814469e-15 | 23 |
| 1.024162e-19 | CTSA ASC IgM     | 0.4719577  | 0.881 | 0.489 | 1.825978e-15 | 23 |

|              |                  |                |       |              |              |    |
|--------------|------------------|----------------|-------|--------------|--------------|----|
| 1.152362e-19 | C4orf3 ASC IgM   | 0.3843589      | 0.439 | 0.132        | 2.054547e-15 | 23 |
| 1.274443e-19 | AP3D1 ASC IgM    | 0.459607 0.519 | 0.171 | 2.272204e-15 | 23           |    |
| 1.526705e-19 | AKIRIN2 ASC IgM  | 0.3935446      | 0.199 | 0.032        | 2.721962e-15 | 23 |
| 2.038065e-19 | GPR137B ASC IgM  | 0.4189308      | 0.46  | 0.137        | 3.633666e-15 | 23 |
| 2.956577e-19 | GOLGB1 ASC IgM   | 0.4981974      | 0.596 | 0.239        | 5.271281e-15 | 23 |
| 2.988468e-19 | PHACTR1 ASC IgM  | 0.3515531      | 0.22  | 0.031        | 5.32814e-15  | 23 |
| 3.555487e-19 | ESR2 ASC IgM     | 0.3199216      | 0.846 | 0.529        | 6.339078e-15 | 23 |
| 3.615393e-19 | GHITM ASC IgM    | 0.4182644      | 0.359 | 0.102        | 6.445885e-15 | 23 |
| 3.660145e-19 | SLC25A4 ASC IgM  | 0.4869215      | 0.442 | 0.129        | 6.525673e-15 | 23 |
| 6.765477e-19 | C16orf87 ASC IgM | -1.071079      | 0.154 | 0.317        | 1.206217e-14 | 23 |
| 7.545417e-19 | CD69 ASC IgM     | 0.4033192      | 0.439 | 0.122        | 1.345272e-14 | 23 |
| 1.032282e-18 | B4GALT3 ASC IgM  | 0.3384197      | 0.276 | 0.046        | 1.840455e-14 | 23 |
| 1.124451e-18 | FUT8 ASC IgM     | 0.7282473      | 0.392 | 0.09         | 2.004784e-14 | 23 |
| 1.220731e-18 | FCRL2 ASC IgM    | 0.3473206      | 0.703 | 0.357        | 2.176441e-14 | 23 |
| 1.347189e-18 | BSG ASC IgM      | 0.3836389      | 0.3   | 0.061        | 2.401903e-14 | 23 |
| 1.351393e-18 | BCL2L1 ASC IgM   | -0.7800731     | 0.914 | 0.917        | 2.409399e-14 | 23 |
| 1.561162e-18 | PFDN5 ASC IgM    | 0.3176419      | 0.226 | 0.027        | 2.783395e-14 | 23 |
| 1.602483e-18 | RNF103 ASC IgM   | 0.4117322      | 0.789 | 0.447        | 2.857067e-14 | 23 |
| 2.020309e-18 | SF3B5 ASC IgM    | 0.3582004      | 0.457 | 0.142        | 3.602009e-14 | 23 |
| 2.554287e-18 | WDR45 ASC IgM    | 0.3863199      | 0.439 | 0.14         | 4.554038e-14 | 23 |
| 2.830747e-18 | GPAA1 ASC IgM    | 0.5742421      | 0.362 | 0.081        | 5.04694e-14  | 23 |
| 2.942315e-18 | OAS1 ASC IgM     | 0.3572125      | 0.297 | 0.056        | 5.245853e-14 | 23 |
| 3.304419e-18 | MBTPS1 ASC IgM   | 0.3774598      | 0.484 | 0.165        | 5.891448e-14 | 23 |
| 3.38474e-18  | GOLGA4 ASC IgM   | 0.364725 0.409 | 0.124 | 6.034653e-14 | 23           |    |
| 3.702473e-18 | MGAT2 ASC IgM    | 0.4865062      | 0.703 | 0.321        | 6.601138e-14 | 23 |



|              |          |         |       |              |              |    |
|--------------|----------|---------|-------|--------------|--------------|----|
| 4.166958e-18 | BLNK     | ASC IgM | 0.849 | 0.5          | 7.429269e-14 | 23 |
| 4.69329e-18  | NDUFA11  | ASC IgM | 0.574 | 8.367666e-14 | 23           |    |
| 4.734952e-18 | NDUFB11  | ASC IgM | 0.908 | 0.582        | 8.441946e-14 | 23 |
| 5.695469e-18 | ATP5MC3  | ASC IgM | 0.97  | 0.964        | 1.015445e-13 | 23 |
| 5.705379e-18 | RPL4     | ASC IgM | 0.359 | 0.08         | 1.017212e-13 | 23 |
| 5.759001e-18 | PLD3     | ASC IgM | 0.119 | 0.013        | 1.026772e-13 | 23 |
| 6.539638e-18 | CHDH     | ASC IgM | 0.234 | 0.332        | 1.165952e-13 | 23 |
| 6.644855e-18 | RIPOR2   | ASC IgM | 0.401 | 0.502        | 1.184711e-13 | 23 |
| 6.653117e-18 | FOXP1    | ASC IgM | 0.285 | 0.06         | 1.186184e-13 | 23 |
| 1.011561e-17 | STT3A    | ASC IgM | 0.819 | 0.437        | 1.803512e-13 | 23 |
| 1.057398e-17 | AURKAIP1 | ASC IgM | 0.288 | 0.473        | 1.885235e-13 | 23 |
| 1.256562e-17 | CD83     | ASC IgM | 0.228 | 0.036        | 2.240324e-13 | 23 |
| 1.333431e-17 | PIK3CG   | ASC IgM | 0.363 | 2.377374e-13 | 23           |    |
| 1.427905e-17 | PSMA5    | ASC IgM | 0.49  | 0.182        | 2.545812e-13 | 23 |
| 1.497694e-17 | KDELRL1  | ASC IgM | 0.81  | 0.825        | 2.670238e-13 | 23 |
| 1.590865e-17 | EIF3E    | ASC IgM | 0.315 | 0.068        | 2.836353e-13 | 23 |
| 1.843304e-17 | SLC38A10 | ASC IgM | 0.409 | 0.123        | 3.286426e-13 | 23 |
| 1.90782e-17  | ISOC2    | ASC IgM | 0.522 | 0.184        | 3.401452e-13 | 23 |
| 1.937064e-17 | TECR     | ASC IgM | 0.181 | 0.338        | 3.453592e-13 | 23 |
| 2.167556e-17 | CD48     | ASC IgM | 0.599 | 0.242        | 3.864535e-13 | 23 |
| 2.195452e-17 | MRPL55   | ASC IgM | 0.409 | 0.114        | 3.914272e-13 | 23 |
| 2.294985e-17 | PGRMC2   | ASC IgM | 0.941 | 0.929        | 4.091728e-13 | 23 |
| 3.011534e-17 | NPM1     | ASC IgM | 0.671 | 0.329        | 5.369265e-13 | 23 |
| 3.124277e-17 | SRP19    | ASC IgM | 0.519 | 0.577        | 5.570274e-13 | 23 |
| 3.570193e-17 | TUBB     | ASC IgM | 0.712 | 0.364        | 6.365298e-13 | 23 |

|              |                    |            |       |       |              |    |
|--------------|--------------------|------------|-------|-------|--------------|----|
| 3.583473e-17 | RPS19BP1 ASC IgM   | 0.3537363  | 0.412 | 0.117 | 6.388974e-13 | 23 |
| 3.937993e-17 | US01 ASC IgM       | 0.3942925  | 0.573 | 0.255 | 7.021048e-13 | 23 |
| 5.499645e-17 | CDV3 ASC IgM       | -0.7205712 | 0.045 | 0.178 | 9.805318e-13 | 23 |
| 6.229169e-17 | BCL2A1 ASC IgM     | 0.3785948  | 0.905 | 0.618 | 1.110599e-12 | 23 |
| 6.651412e-17 | NDUFA1 ASC IgM     | 0.3250854  | 0.142 | 0.011 | 1.18588e-12  | 23 |
| 6.968771e-17 | HIST1H2BG ASC IgM  | -0.8576897 | 0.154 | 0.269 | 1.242462e-12 | 23 |
| 7.305905e-17 | JUN ASC IgM        | 0.3990183  | 0.757 | 0.362 | 1.30257e-12  | 23 |
| 1.041254e-16 | TERF2IP ASC IgM    | -0.9627212 | 0.665 | 0.697 | 1.856452e-12 | 23 |
| 1.089002e-16 | HNRNPDL ASC IgM    | -0.7783472 | 0.887 | 0.845 | 1.941582e-12 | 23 |
| 1.164655e-16 | HNRNPA2B1 ASC IgM  | 0.4000282  | 0.685 | 0.332 | 2.076463e-12 | 23 |
| 1.198631e-16 | VOPP1 ASC IgM      | 0.3708422  | 0.638 | 0.298 | 2.13704e-12  | 23 |
| 1.270068e-16 | SRP72 ASC IgM      | -0.7313436 | 0.178 | 0.29  | 2.264404e-12 | 23 |
| 1.278681e-16 | DCK ASC IgM        | -0.5410443 | 0.03  | 0.129 | 2.279759e-12 | 23 |
| 1.493384e-16 | CD24 ASC IgM       | 0.4185249  | 0.421 | 0.142 | 2.662555e-12 | 23 |
| 2.239505e-16 | MDFIC ASC IgM      | 0.3920239  | 0.546 | 0.215 | 3.992813e-12 | 23 |
| 2.61993e-16  | IFI27L2 ASC IgM    | 0.392669   | 0.549 | 0.205 | 4.671073e-12 | 23 |
| 2.648084e-16 | MRPS31 ASC IgM     | 0.3553988  | 0.38  | 0.105 | 4.721268e-12 | 23 |
| 2.820754e-16 | SEC31A ASC IgM     | 0.3467905  | 0.84  | 0.495 | 5.029122e-12 | 23 |
| 2.846521e-16 | COX5A ASC IgM      | 0.4831192  | 0.941 | 0.721 | 5.075062e-12 | 23 |
| 2.938532e-16 | COX6C ASC IgM      | 0.3247178  | 0.463 | 0.155 | 5.23911e-12  | 23 |
| 2.97591e-16  | MGAT1 ASC IgM      | 0.3355076  | 0.344 | 0.085 | 5.30575e-12  | 23 |
| 3.106587e-16 | PNOC ASC IgM       | 0.4060503  | 0.3   | 0.063 | 5.538734e-12 | 23 |
| 3.579668e-16 | AC243960.1 ASC IgM | 0.3822363  | 0.469 | 0.153 | 6.38219e-12  | 23 |
| 3.637836e-16 | GEMIN7 ASC IgM     | 0.3773963  | 0.451 | 0.153 | 6.485897e-12 | 23 |
| 3.687162e-16 | SMAP1 ASC IgM      | 0.3402199  | 0.214 | 0.034 | 6.573841e-12 | 23 |

|              |          |         |            |       |       |              |    |
|--------------|----------|---------|------------|-------|-------|--------------|----|
| 4.070109e-16 | SLC44A1  | ASC IgM | 0.3021514  | 0.599 | 0.272 | 7.256597e-12 | 23 |
| 4.118999e-16 | AUP1     | ASC IgM | 0.5055804  | 0.377 | 0.093 | 7.343763e-12 | 23 |
| 4.304813e-16 | FCRL5    | ASC IgM | -0.5526078 | 0.053 | 0.168 | 7.675051e-12 | 23 |
| 4.365538e-16 | SNX10    | ASC IgM | 0.3287756  | 0.234 | 0.049 | 7.783318e-12 | 23 |
| 4.407996e-16 | STX11    | ASC IgM | 0.3413318  | 0.415 | 0.117 | 7.859017e-12 | 23 |
| 4.937558e-16 | ATP6AP1  | ASC IgM | -0.9365367 | 0.522 | 0.596 | 8.803172e-12 | 23 |
| 6.436845e-16 | TPM3     | ASC IgM | 0.4326307  | 0.332 | 0.067 | 1.147625e-11 | 23 |
| 6.511817e-16 | ITM2C    | ASC IgM | -0.4353861 | 0.012 | 0.105 | 1.160992e-11 | 23 |
| 7.123099e-16 | RMI2     | ASC IgM | 0.4137122  | 0.507 | 0.176 | 1.269977e-11 | 23 |
| 7.542223e-16 | ICAM3    | ASC IgM | 0.3136081  | 0.849 | 0.52  | 1.344703e-11 | 23 |
| 7.683843e-16 | SELENOT  | ASC IgM | 0.3367362  | 0.424 | 0.134 | 1.369952e-11 | 23 |
| 7.750497e-16 | CD46     | ASC IgM | 0.414221   | 0.626 | 0.325 | 1.381836e-11 | 23 |
| 8.650639e-16 | BST2     | ASC IgM | 0.3137428  | 0.552 | 0.207 | 1.542322e-11 | 23 |
| 9.413355e-16 | STX5     | ASC IgM | 0.4245029  | 0.914 | 0.602 | 1.678307e-11 | 23 |
| 1.133855e-15 | DYNLL1   | ASC IgM | 0.3063274  | 0.214 | 0.04  | 2.02155e-11  | 23 |
| 1.285784e-15 | ELL      | ASC IgM | 0.4163196  | 0.861 | 0.532 | 2.292424e-11 | 23 |
| 1.364594e-15 | SRSF9    | ASC IgM | 0.4136624  | 0.861 | 0.554 | 2.432935e-11 | 23 |
| 1.369424e-15 | ATP5IF1  | ASC IgM | 0.3264542  | 0.739 | 0.393 | 2.441546e-11 | 23 |
| 2.629138e-15 | NDUFAB1  | ASC IgM | -0.8765593 | 0.267 | 0.348 | 4.68749e-11  | 23 |
| 2.717954e-15 | TRAF3IP3 | ASC IgM | -0.5816143 | 0.071 | 0.196 | 4.845841e-11 | 23 |
| 3.422213e-15 | AFF3     | ASC IgM | 0.3447635  | 0.356 | 0.107 | 6.101464e-11 | 23 |
| 3.555776e-15 | DAP      | ASC IgM | -0.6469497 | 0.953 | 0.944 | 6.339593e-11 | 23 |
| 3.710172e-15 | NACA     | ASC IgM | 0.4799955  | 0.558 | 0.25  | 6.614865e-11 | 23 |
| 4.16388e-15  | RGS10    | ASC IgM | 0.4044699  | 0.632 | 0.271 | 7.423781e-11 | 23 |
| 4.288936e-15 | POU2AF1  | ASC IgM | 0.4346571  | 0.614 | 0.276 | 7.646744e-11 | 23 |

|              |                 |            |       |       |              |    |
|--------------|-----------------|------------|-------|-------|--------------|----|
| 4.671615e-15 | STK17B ASC IgM  | 0.377021   | 0.341 | 0.087 | 8.329022e-11 | 23 |
| 4.802776e-15 | TPST2 ASC IgM   | 0.4502618  | 0.341 | 0.106 | 8.56287e-11  | 23 |
| 4.84678e-15  | CITED2 ASC IgM  | 0.4424097  | 0.49  | 0.18  | 8.641324e-11 | 23 |
| 5.155387e-15 | RASGRP3 ASC IgM | 0.3716624  | 0.32  | 0.072 | 9.191539e-11 | 23 |
| 5.782779e-15 | GPX7 ASC IgM    | 0.3516104  | 0.798 | 0.47  | 1.031012e-10 | 23 |
| 5.957621e-15 | NDUFB4 ASC IgM  | -0.822937  | 0.205 | 0.33  | 1.062184e-10 | 23 |
| 6.728847e-15 | SMC6 ASC IgM    | 0.3453532  | 0.371 | 0.096 | 1.199686e-10 | 23 |
| 6.778328e-15 | IFT27 ASC IgM   | -0.3662148 | 0.994 | 0.993 | 1.208508e-10 | 23 |
| 6.80447e-15  | FAU ASC IgM     | 0.3339484  | 0.605 | 0.259 | 1.213169e-10 | 23 |
| 8.295658e-15 | PSMC2 ASC IgM   | 0.3187514  | 0.309 | 0.063 | 1.479033e-10 | 23 |
| 9.118273e-15 | MXD4 ASC IgM    | 0.3916844  | 0.401 | 0.13  | 1.625697e-10 | 23 |
| 1.166376e-14 | PAPSS1 ASC IgM  | 0.4052993  | 0.772 | 0.465 | 2.079531e-10 | 23 |
| 1.255409e-14 | ITM2B ASC IgM   | 0.3485012  | 0.611 | 0.245 | 2.238269e-10 | 23 |
| 2.000116e-14 | SNRPN ASC IgM   | 0.3114858  | 0.318 | 0.088 | 3.566007e-10 | 23 |
| 2.313728e-14 | UBE2M ASC IgM   | -0.6928128 | 0.202 | 0.286 | 4.125145e-10 | 23 |
| 2.523903e-14 | SP110 ASC IgM   | 0.3186869  | 0.326 | 0.081 | 4.499866e-10 | 23 |
| 2.831798e-14 | ALG2 ASC IgM    | -0.8294291 | 0.415 | 0.477 | 5.048814e-10 | 23 |
| 3.047589e-14 | FUS ASC IgM     | -0.8180033 | 0.816 | 0.815 | 5.433546e-10 | 23 |
| 3.185513e-14 | NOP53 ASC IgM   | 0.3456392  | 0.365 | 0.101 | 5.679452e-10 | 23 |
| 3.809882e-14 | IFI35 ASC IgM   | 0.3431067  | 0.691 | 0.313 | 6.792639e-10 | 23 |
| 3.879947e-14 | SCAND1 ASC IgM  | -0.640552  | 0.932 | 0.895 | 6.917557e-10 | 23 |
| 4.052638e-14 | PPIA ASC IgM    | 0.3405809  | 0.205 | 0.037 | 7.225449e-10 | 23 |
| 4.076797e-14 | PDE4DIP ASC IgM | 0.3593568  | 0.291 | 0.069 | 7.268521e-10 | 23 |
| 4.306894e-14 | UBE2H ASC IgM   | -0.9623693 | 0.22  | 0.352 | 7.678762e-10 | 23 |
| 4.335966e-14 | LY6E ASC IgM    | -0.8243398 | 0.398 | 0.472 | 7.730593e-10 | 23 |

|              |                   |                |       |              |                 |
|--------------|-------------------|----------------|-------|--------------|-----------------|
| 4.446848e-14 | GPSM3 ASC IgM     | 0.300726 0.573 | 0.248 | 7.928285e-10 | 23              |
| 4.499314e-14 | IER3IP1 ASC IgM   | 0.3101751      | 0.739 | 0.399        | 8.021827e-10 23 |
| 8.495103e-14 | UQCRFS1 ASC IgM   | 0.4942296      | 0.264 | 0.076        | 1.514592e-09 23 |
| 8.666328e-14 | CRYZ ASC IgM      | -0.6070485     | 0.151 | 0.241        | 1.54512e-09 23  |
| 9.687121e-14 | MCUB ASC IgM      | 0.333939 0.641 | 0.316 | 1.727117e-09 | 23              |
| 1.189799e-13 | ERGIC3 ASC IgM    | -0.8130149     | 0.976 | 0.961        | 2.121292e-09 23 |
| 1.316844e-13 | MT-ND2 ASC IgM    | -0.7508101     | 0.685 | 0.668        | 2.3478e-09 23   |
| 1.42774e-13  | GDI2 ASC IgM      | 0.314064 0.92  | 0.645 | 2.545517e-09 | 23              |
| 2.258208e-13 | UQCR11 ASC IgM    | -0.7873767     | 0.181 | 0.279        | 4.026159e-09 23 |
| 2.411055e-13 | IFITM2 ASC IgM    | 0.5320661      | 0.427 | 0.136        | 4.29867e-09 23  |
| 2.667939e-13 | SIT1 ASC IgM      | -0.6634974     | 0.214 | 0.298        | 4.756669e-09 23 |
| 3.156651e-13 | BLK ASC IgM       | 0.4412926      | 0.525 | 0.207        | 5.627993e-09 23 |
| 3.75981e-13  | EHD1 ASC IgM      | -0.8291393     | 0.828 | 0.774        | 6.703366e-09 23 |
| 3.91231e-13  | HLA-DPB1 ASC IgM  | -0.504536      | 0.104 | 0.175        | 6.975257e-09 23 |
| 4.421932e-13 | QRSL1 ASC IgM     | -0.7272724     | 0.214 | 0.28         | 7.883862e-09 23 |
| 4.53352e-13  | RNASSET2 ASC IgM  | -0.6932829     | 0.875 | 0.805        | 8.082814e-09 23 |
| 4.638145e-13 | CALM2 ASC IgM     | 0.5595554      | 0.481 | 0.158        | 8.269348e-09 23 |
| 4.751519e-13 | SUSD3 ASC IgM     | -0.814726      | 0.315 | 0.399        | 8.471484e-09 23 |
| 4.962836e-13 | BLOC1S2 ASC IgM   | 0.3142096      | 0.273 | 0.065        | 8.84824e-09 23  |
| 5.207957e-13 | C1GALT1C1 ASC IgM | 0.4426246      | 0.774 | 0.444        | 9.285267e-09 23 |
| 5.464176e-13 | BTG2 ASC IgM      | -0.8777393     | 0.231 | 0.384        | 9.742079e-09 23 |
| 5.480544e-13 | CD44 ASC IgM      | 0.3020051      | 0.178 | 0.034        | 9.771262e-09 23 |
| 6.767303e-13 | NDFIP2 ASC IgM    | 0.3076938      | 0.721 | 0.396        | 1.206543e-08 23 |
| 7.382645e-13 | PSMA3 ASC IgM     | 0.4573515      | 0.377 | 0.116        | 1.316252e-08 23 |
| 8.461066e-13 | TBC1D1 ASC IgM    | -0.8019412     | 0.297 | 0.401        | 1.508524e-08 23 |

|              |           |         |       |              |              |    |
|--------------|-----------|---------|-------|--------------|--------------|----|
| 8.825081e-13 | REL       | ASC IgM | 0.377 | 0.13         | 1.573424e-08 | 23 |
| 1.032102e-12 | DUSP22    | ASC IgM | 0.436 | 0.151        | 1.840134e-08 | 23 |
| 1.138192e-12 | CD81      | ASC IgM | 0.288 | 0.068        | 2.029282e-08 | 23 |
| 1.154163e-12 | MAGED1    | ASC IgM | 0.148 | 0.242        | 2.057757e-08 | 23 |
| 1.183358e-12 | ARHGAP45  | ASC IgM | 0.579 | 0.262        | 2.109809e-08 | 23 |
| 1.263685e-12 | EMC6      | ASC IgM | 0.148 | 0.212        | 2.253024e-08 | 23 |
| 1.354279e-12 | FAM111B   | ASC IgM | 0.694 | 0.295        | 2.414544e-08 | 23 |
| 1.626381e-12 | TCF4      | ASC IgM | 0.335 | 0.116        | 2.899675e-08 | 23 |
| 1.781833e-12 | GOSR2     | ASC IgM | 0.243 | 0.061        | 3.176831e-08 | 23 |
| 1.862221e-12 | NINJ1     | ASC IgM | 0.445 | 0.163        | 3.320154e-08 | 23 |
| 2.000617e-12 | DEF8      | ASC IgM | 0.605 | 0.267        | 3.5669e-08   | 23 |
| 2.094643e-12 | TOP1      | ASC IgM | 0.777 | 0.702        | 3.734539e-08 | 23 |
| 2.331261e-12 | COMMD6    | ASC IgM | 0.328 | 4.156406e-08 | 23           |    |
| 2.96952e-12  | CCM2      | ASC IgM | 0.309 | 0.09         | 5.294357e-08 | 23 |
| 2.984085e-12 | HIST1H2AC | ASC IgM | 0.228 | 0.274        | 5.320326e-08 | 23 |
| 3.111565e-12 | KLF2      | ASC IgM | 0.46  | 0.494        | 5.54761e-08  | 23 |
| 3.378581e-12 | SP100     | ASC IgM | 0.151 | 0.233        | 6.023672e-08 | 23 |
| 3.626631e-12 | IL4R      | ASC IgM | 0.03  | 0.102        | 6.465921e-08 | 23 |
| 3.653726e-12 | BACH2     | ASC IgM | 0.754 | 0.396        | 6.514229e-08 | 23 |
| 3.809636e-12 | NDUFS5    | ASC IgM | 0.659 | 0.303        | 6.7922e-08   | 23 |
| 3.828136e-12 | TIMM8B    | ASC IgM | 0.187 | 0.284        | 6.825183e-08 | 23 |
| 3.968642e-12 | LAT2      | ASC IgM | 0.97  | 0.934        | 7.075691e-08 | 23 |
| 4.073456e-12 | MT-ATP6   | ASC IgM | 0.774 | 0.764        | 7.262565e-08 | 23 |
| 4.098828e-12 | MYL12A    | ASC IgM | 0.834 | 0.513        | 7.3078e-08   | 23 |
| 4.578781e-12 | LSP1      | ASC IgM | 0.46  | 8.163509e-08 | 23           |    |

|              |                |       |       |              |    |  |
|--------------|----------------|-------|-------|--------------|----|--|
| SWAP70       | ASC IgM        |       |       |              |    |  |
| 4.645669e-12 | 0.3016386      | 0.344 | 0.105 | 8.282764e-08 | 23 |  |
| MCUR1        | ASC IgM        |       |       |              |    |  |
| 4.886059e-12 | 0.6146999      | 0.519 | 0.208 | 8.711355e-08 | 23 |  |
| ADA          | ASC IgM        |       |       |              |    |  |
| 5.952615e-12 | -0.8159645     | 0.401 | 0.44  | 1.061292e-07 | 23 |  |
| HMGA1        | ASC IgM        |       |       |              |    |  |
| 7.122882e-12 | 0.3625893      | 0.353 | 0.097 | 1.269939e-07 | 23 |  |
| SYVN1        | ASC IgM        |       |       |              |    |  |
| 1.025839e-11 | 0.3614573      | 0.57  | 0.287 | 1.828968e-07 | 23 |  |
| C7orf50      | ASC IgM        |       |       |              |    |  |
| 1.027994e-11 | -1.117244      | 0.371 | 0.404 | 1.832811e-07 | 23 |  |
| FABP5        | ASC IgM        |       |       |              |    |  |
| 1.179503e-11 | 0.3205794      | 0.267 | 0.084 | 2.102936e-07 | 23 |  |
| DUS1L        | ASC IgM        |       |       |              |    |  |
| 1.26208e-11  | 0.3261013      | 0.231 | 0.061 | 2.250163e-07 | 23 |  |
| ORC6         | ASC IgM        |       |       |              |    |  |
| 1.27482e-11  | -0.5510918     | 0.16  | 0.268 | 2.272877e-07 | 23 |  |
| ALOX5AP      | ASC IgM        |       |       |              |    |  |
| 1.309849e-11 | -0.6521653     | 0.742 | 0.72  | 2.335329e-07 | 23 |  |
| EIF3F        | ASC IgM        |       |       |              |    |  |
| 1.372077e-11 | 0.3163047      | 0.32  | 0.093 | 2.446276e-07 | 23 |  |
| KLF13        | ASC IgM        |       |       |              |    |  |
| 1.372201e-11 | 0.3034766      | 0.202 | 0.047 | 2.446496e-07 | 23 |  |
| LRRK1        | ASC IgM        |       |       |              |    |  |
| 1.424474e-11 | 0.305127 0.739 | 0.397 |       | 2.539694e-07 | 23 |  |
| RAP1A        | ASC IgM        |       |       |              |    |  |
| 1.44327e-11  | -0.844393      | 0.763 | 0.769 | 2.573205e-07 | 23 |  |
| RPL17        | ASC IgM        |       |       |              |    |  |
| 1.60478e-11  | -0.5431604     | 0.979 | 0.974 | 2.861162e-07 | 23 |  |
| MT-ND4       | ASC IgM        |       |       |              |    |  |
| 1.644293e-11 | 0.4153247      | 0.659 | 0.333 | 2.931611e-07 | 23 |  |
| ANXA11       | ASC IgM        |       |       |              |    |  |
| 1.801871e-11 | -0.7502973     | 0.724 | 0.717 | 3.212556e-07 | 23 |  |
| EIF4A2       | ASC IgM        |       |       |              |    |  |
| 2.085131e-11 | -0.6565261     | 0.223 | 0.312 | 3.717581e-07 | 23 |  |
| PNRC2        | ASC IgM        |       |       |              |    |  |
| 2.454868e-11 | 0.4588306      | 0.585 | 0.263 | 4.376784e-07 | 23 |  |
| FAM3C        | ASC IgM        |       |       |              |    |  |
| 2.625928e-11 | -0.6958981     | 0.371 | 0.426 | 4.681768e-07 | 23 |  |
| CD40         | ASC IgM        |       |       |              |    |  |
| 2.948164e-11 | -0.5948335     | 0.148 | 0.206 | 5.256281e-07 | 23 |  |
| PRKCB        | ASC IgM        |       |       |              |    |  |
| 3.254027e-11 | -1.102978      | 0.454 | 0.652 | 5.801605e-07 | 23 |  |
| RPS4Y1       | ASC IgM        |       |       |              |    |  |
| 3.563852e-11 | -0.6154192     | 0.116 | 0.212 | 6.353992e-07 | 23 |  |
| LBH          | ASC IgM        |       |       |              |    |  |
| 3.62715e-11  | 0.7415929      | 0.157 | 0.04  | 6.466845e-07 | 23 |  |
| IGLL5        | ASC IgM        |       |       |              |    |  |
| 3.847423e-11 | 0.3077436      | 0.285 | 0.083 | 6.859571e-07 | 23 |  |

|              |         |         |            |       |       |              |    |
|--------------|---------|---------|------------|-------|-------|--------------|----|
| 4.414301e-11 | RBM33   | ASC IgM | -0.8393876 | 0.377 | 0.446 | 7.870256e-07 | 23 |
| 4.799948e-11 | KLF6    | ASC IgM | -0.3878358 | 0.027 | 0.105 | 8.557828e-07 | 23 |
| 5.038118e-11 | TRAF5   | ASC IgM | 0.3286524  | 0.73  | 0.372 | 8.98246e-07  | 23 |
| 5.252232e-11 | PTP4A2  | ASC IgM | 0.3222344  | 0.593 | 0.243 | 9.364204e-07 | 23 |
| 5.70758e-11  | NBDY    | ASC IgM | 0.3998318  | 0.433 | 0.144 | 1.017604e-06 | 23 |
| 5.800345e-11 | SEC14L1 | ASC IgM | 0.3423267  | 0.733 | 0.416 | 1.034143e-06 | 23 |
| 6.184874e-11 | CTSH    | ASC IgM | -0.5238685 | 0.95  | 0.917 | 1.102701e-06 | 23 |
| 6.489794e-11 | COX4I1  | ASC IgM | 0.3049526  | 0.401 | 0.129 | 1.157065e-06 | 23 |
| 6.588375e-11 | MAGEF1  | ASC IgM | -0.6773495 | 0.089 | 0.197 | 1.174641e-06 | 23 |
| 7.328192e-11 | CHPT1   | ASC IgM | -0.5959605 | 0.074 | 0.184 | 1.306543e-06 | 23 |
| 9.028851e-11 | MBP     | ASC IgM | 0.3274369  | 0.644 | 0.318 | 1.609754e-06 | 23 |
| 9.406228e-11 | AP3S1   | ASC IgM | -0.8049538 | 0.104 | 0.221 | 1.677036e-06 | 23 |
| 1.071547e-10 | GBP2    | ASC IgM | 0.3274847  | 0.481 | 0.207 | 1.910461e-06 | 23 |
| 1.386991e-10 | CFLAR   | ASC IgM | -0.5668344 | 0.415 | 0.403 | 2.472865e-06 | 23 |
| 1.587056e-10 | MBD4    | ASC IgM | -0.6648052 | 0.042 | 0.137 | 2.829562e-06 | 23 |
| 1.712069e-10 | FCER2   | ASC IgM | 0.3192026  | 0.344 | 0.119 | 3.052448e-06 | 23 |
| 1.79175e-10  | SNHG9   | ASC IgM | -0.6621962 | 0.228 | 0.328 | 3.194511e-06 | 23 |
| 1.837096e-10 | PTPN6   | ASC IgM | -0.8033909 | 0.976 | 0.942 | 3.275359e-06 | 23 |
| 1.958198e-10 | YBX1    | ASC IgM | -0.4950288 | 0.098 | 0.148 | 3.491271e-06 | 23 |
| 2.094747e-10 | ALOX5   | ASC IgM | 0.3290001  | 0.35  | 0.131 | 3.734725e-06 | 23 |
| 2.407201e-10 | PRKCD   | ASC IgM | -0.7204956 | 0.7   | 0.677 | 4.291799e-06 | 23 |
| 2.415022e-10 | TAGLN2  | ASC IgM | -0.5924122 | 0.961 | 0.928 | 4.305743e-06 | 23 |
| 2.480391e-10 | EEF1D   | ASC IgM | -0.6796003 | 0.451 | 0.469 | 4.422289e-06 | 23 |
| 2.696903e-10 | SNRPF   | ASC IgM | -0.771235  | 0.442 | 0.533 | 4.808308e-06 | 23 |
| 2.84955e-10  | IMPDH2  | ASC IgM | -0.4836502 | 0.033 | 0.106 | 5.080462e-06 | 23 |



|              |          |         |            |       |       |              |    |
|--------------|----------|---------|------------|-------|-------|--------------|----|
| 3.4453e-10   | C1orf162 | ASC IgM | 0.3413625  | 0.825 | 0.489 | 6.142626e-06 | 23 |
| 3.517235e-10 | RAC2     | ASC IgM | -0.5758783 | 0.226 | 0.289 | 6.270878e-06 | 23 |
| 3.562579e-10 | RRAS2    | ASC IgM | -0.4711824 | 0.056 | 0.127 | 6.351722e-06 | 23 |
| 3.953707e-10 | ZEB2     | ASC IgM | -0.7947645 | 0.896 | 0.854 | 7.049065e-06 | 23 |
| 4.102484e-10 | SH3BGRL3 | ASC IgM | -0.5367716 | 0.187 | 0.245 | 7.314319e-06 | 23 |
| 4.447834e-10 | RASGRP2  | ASC IgM | 0.4282839  | 0.635 | 0.272 | 7.930044e-06 | 23 |
| 4.477417e-10 | NCF1     | ASC IgM | -0.7173497 | 0.211 | 0.327 | 9.765687e-06 | 23 |
| 5.633726e-10 | PMAIP1   | ASC IgM | -0.5958198 | 0.297 | 0.339 | 1.004437e-05 | 23 |
| 5.787051e-10 | STK17A   | ASC IgM | 0.5498617  | 0.611 | 0.266 | 1.031773e-05 | 23 |
| 6.266998e-10 | PIM1     | ASC IgM | 0.4021741  | 0.145 | 0.03  | 1.117343e-05 | 23 |
| 6.565575e-10 | DHRS9    | ASC IgM | -0.6589983 | 0.484 | 0.49  | 1.170576e-05 | 23 |
| 7.725472e-10 | CBX3     | ASC IgM | 0.3747136  | 0.496 | 0.185 | 1.377374e-05 | 23 |
| 7.94937e-10  | HLA-D0B  | ASC IgM | -0.5636885 | 0.113 | 0.187 | 1.417293e-05 | 23 |
| 8.073595e-10 | KIF20B   | ASC IgM | -0.611948  | 0.22  | 0.286 | 1.439441e-05 | 23 |
| 8.415257e-10 | PLEKHF2  | ASC IgM | -0.3365751 | 0.036 | 0.111 | 1.500356e-05 | 23 |
| 8.543828e-10 | CENPH    | ASC IgM | -0.5079606 | 0.101 | 0.155 | 1.523279e-05 | 23 |
| 1.035899e-09 | MCM7     | ASC IgM | -0.703275  | 0.288 | 0.366 | 1.846905e-05 | 23 |
| 1.066675e-09 | LRRFIP1  | ASC IgM | -0.6202614 | 0.157 | 0.254 | 1.901775e-05 | 23 |
| 1.095506e-09 | RRP7A    | ASC IgM | 0.3060441  | 0.49  | 0.224 | 1.953177e-05 | 23 |
| 1.156275e-09 | ALKBH7   | ASC IgM | -0.7123441 | 0.706 | 0.615 | 2.061522e-05 | 23 |
| 1.221393e-09 | MEF2C    | ASC IgM | -0.4039191 | 0.086 | 0.159 | 2.177622e-05 | 23 |
| 1.483268e-09 | CTSZ     | ASC IgM | -0.7696654 | 0.131 | 0.238 | 2.644519e-05 | 23 |
| 1.49045e-09  | CAPG     | ASC IgM | -0.6540991 | 0.249 | 0.297 | 2.657324e-05 | 23 |
| 1.867353e-09 | PDLIM1   | ASC IgM | -0.6105846 | 0.282 | 0.341 | 3.329304e-05 | 23 |
| 2.228833e-09 | EIF2S3   | ASC IgM | -0.4262075 | 0.22  | 0.289 | 3.973786e-05 | 23 |

|              |           |         |            |       |       |              |    |
|--------------|-----------|---------|------------|-------|-------|--------------|----|
| 2.268516e-09 | BCAS4     | ASC IgM | -0.7819473 | 0.039 | 0.131 | 4.044536e-05 | 23 |
| 2.521633e-09 | MYC       | ASC IgM | 0.3027431  | 0.407 | 0.141 | 4.49582e-05  | 23 |
| 3.020915e-09 | RAB30     | ASC IgM | 0.3092755  | 0.306 | 0.115 | 5.385989e-05 | 23 |
| 3.035198e-09 | GOT2      | ASC IgM | 0.4593724  | 0.326 | 0.105 | 5.411455e-05 | 23 |
| 3.274121e-09 | HRK       | ASC IgM | -0.4587126 | 0.068 | 0.121 | 5.83743e-05  | 23 |
| 3.692132e-09 | LPP       | ASC IgM | -0.4463252 | 0.024 | 0.101 | 6.582702e-05 | 23 |
| 3.740864e-09 | RHOC      | ASC IgM | -0.4212318 | 0.053 | 0.131 | 6.669586e-05 | 23 |
| 4.138713e-09 | UVRAG     | ASC IgM | -0.6479508 | 0.374 | 0.401 | 7.378912e-05 | 23 |
| 4.454348e-09 | RPA3      | ASC IgM | 0.3134782  | 0.237 | 0.068 | 7.941658e-05 | 23 |
| 4.580817e-09 | ST14      | ASC IgM | 0.4990047  | 0.282 | 0.048 | 8.167139e-05 | 23 |
| 5.638193e-09 | XIST      | ASC IgM | 0.3469235  | 0.398 | 0.142 | 0.0001005233 | 23 |
| 6.384421e-09 | HSH2D     | ASC IgM | -0.9410339 | 0.43  | 0.456 | 0.0001138278 | 23 |
| 6.602914e-09 | JUNB      | ASC IgM | -0.4610695 | 0.071 | 0.146 | 0.0001177234 | 23 |
| 6.628886e-09 | COBLL1    | ASC IgM | -0.6284068 | 0.769 | 0.669 | 0.0001181864 | 23 |
| 6.665009e-09 | SNX3      | ASC IgM | -0.7168858 | 0.315 | 0.335 | 0.0001188304 | 23 |
| 7.180265e-09 | DUT       | ASC IgM | 0.3131534  | 0.273 | 0.101 | 0.0001280169 | 23 |
| 7.467751e-09 | AMZ2      | ASC IgM | -0.4469779 | 0.047 | 0.11  | 0.0001331425 | 23 |
| 7.537533e-09 | LINC02397 | ASC IgM | -0.7503221 | 0.866 | 0.767 | 0.0001343867 | 23 |
| 7.608147e-09 | HMG1      | ASC IgM | -0.5396497 | 0.362 | 0.365 | 0.0001356457 | 23 |
| 8.160747e-09 | SNAP23    | ASC IgM | -0.6628454 | 0.365 | 0.397 | 0.000145498  | 23 |
| 8.515532e-09 | CIB1      | ASC IgM | -0.548415  | 0.11  | 0.19  | 0.0001518234 | 23 |
| 8.630266e-09 | IFNGR1    | ASC IgM | -0.5335367 | 0.065 | 0.148 | 0.000153869  | 23 |
| 8.933291e-09 | ARRDC2    | ASC IgM | -0.3554201 | 0.039 | 0.1   | 0.0001592717 | 23 |
| 9.515367e-09 | TRIM22    | ASC IgM | 0.3017181  | 0.383 | 0.133 | 0.0001696495 | 23 |
| 1.218239e-08 | MPST      | ASC IgM | -0.6741989 | 0.273 | 0.319 | 0.0002171998 | 23 |

|              |            |         |            |       |       |              |    |
|--------------|------------|---------|------------|-------|-------|--------------|----|
| 1.322191e-08 | SNHG7      | ASC IgM | -0.5945099 | 0.878 | 0.805 | 0.0002357334 | 23 |
| 1.327414e-08 | HNRNPK     | ASC IgM | -0.648181  | 0.217 | 0.311 | 0.0002366646 | 23 |
| 1.609671e-08 | SERPINB1   | ASC IgM | -0.3767296 | 0.062 | 0.125 | 0.0002869883 | 23 |
| 1.781207e-08 | AC025164.1 | ASC IgM | -0.5305592 | 0.065 | 0.15  | 0.0003175713 | 23 |
| 1.814336e-08 | CELF2      | ASC IgM | -0.3729574 | 0.047 | 0.114 | 0.000323478  | 23 |
| 2.050776e-08 | LGALS9     | ASC IgM | -0.4903533 | 0.926 | 0.899 | 0.0003656328 | 23 |
| 2.275866e-08 | DDX5       | ASC IgM | -0.4978223 | 0.092 | 0.178 | 0.0004057641 | 23 |
| 2.46996e-08  | STAT6      | ASC IgM | -0.6444009 | 0.261 | 0.342 | 0.0004403692 | 23 |
| 2.58437e-08  | PKIG       | ASC IgM | -0.3651426 | 0.05  | 0.101 | 0.0004607673 | 23 |
| 2.585492e-08 | CDKN2D     | ASC IgM | -0.610169  | 0.318 | 0.375 | 0.0004609674 | 23 |
| 2.672121e-08 | LCP1       | ASC IgM | -0.5076514 | 0.202 | 0.249 | 0.0004764125 | 23 |
| 2.723109e-08 | OFD1       | ASC IgM | -0.7563312 | 0.448 | 0.448 | 0.0004855031 | 23 |
| 2.926981e-08 | PNRC1      | ASC IgM | -0.4933999 | 0.958 | 0.919 | 0.0005218515 | 23 |
| 3.554407e-08 | CFL1       | ASC IgM | -0.5743164 | 0.401 | 0.42  | 0.0006337153 | 23 |
| 3.768258e-08 | FAM49B     | ASC IgM | -0.8195962 | 0.095 | 0.198 | 0.0006718427 | 23 |
| 4.018582e-08 | ACP5       | ASC IgM | -0.6004531 | 0.496 | 0.465 | 0.000716473  | 23 |
| 4.908864e-08 | SF1        | ASC IgM | -0.4464329 | 0.955 | 0.905 | 0.0008752013 | 23 |
| 5.747932e-08 | ATP5F1E    | ASC IgM | -1.353131  | 0.398 | 0.466 | 0.001024799  | 23 |
| 6.060661e-08 | S100A6     | ASC IgM | -0.4511218 | 0.128 | 0.18  | 0.001080555  | 23 |
| 6.180308e-08 | LYL1       | ASC IgM | -1.349383  | 0.371 | 0.302 | 0.001101887  | 23 |
| 6.746042e-08 | HMGB2      | ASC IgM | -0.5478015 | 0.315 | 0.347 | 0.001202752  | 23 |
| 8.032294e-08 | BIRC3      | ASC IgM | -0.5596269 | 0.291 | 0.32  | 0.001432078  | 23 |
| 9.295358e-08 | LTA4H      | ASC IgM | -0.6603586 | 0.724 | 0.697 | 0.001657269  | 23 |
| 1.011165e-07 | HLA-DQB1   | ASC IgM | -0.4980239 | 0.273 | 0.314 | 0.001802807  | 23 |
| 1.081792e-07 | LYN        | ASC IgM | -0.386716  | 0.074 | 0.141 | 0.001928726  | 23 |

|              |          |         |       |       |             |    |
|--------------|----------|---------|-------|-------|-------------|----|
| 1.094596e-07 | AIM2     | ASC IgM | 0.258 | 0.289 | 0.001951556 | 23 |
| 1.123778e-07 | RUBCNL   | ASC IgM | 0.807 | 0.786 | 0.002003584 | 23 |
| 1.227931e-07 | ACTG1    | ASC IgM | 0.451 | 0.156 | 0.002189277 | 23 |
| 1.327734e-07 | KIAA0040 | ASC IgM | 0.139 | 0.199 | 0.002367217 | 23 |
| 1.446847e-07 | MCM3     | ASC IgM | 0.062 | 0.117 | 0.002579583 | 23 |
| 1.494817e-07 | KLHL5    | ASC IgM | 0.045 | 0.106 | 0.002665109 | 23 |
| 1.854277e-07 | PDE7A    | ASC IgM | 0.142 | 0.173 | 0.00330599  | 23 |
| 1.970406e-07 | TMEM156  | ASC IgM | 0.205 | 0.259 | 0.003513038 | 23 |
| 2.028683e-07 | CNN2     | ASC IgM | 0.166 | 0.232 | 0.003616939 | 23 |
| 2.133785e-07 | TAF15    | ASC IgM | 0.136 | 0.201 | 0.003804325 | 23 |
| 2.260986e-07 | NMI      | ASC IgM | 0.092 | 0.14  | 0.004031112 | 23 |
| 2.280148e-07 | ADD3     | ASC IgM | 0.496 | 0.208 | 0.004065276 | 23 |
| 2.474282e-07 | SYAP1    | ASC IgM | 0.973 | 0.976 | 0.004411397 | 23 |
| 2.478363e-07 | FTH1     | ASC IgM | 0.056 | 0.113 | 0.004418673 | 23 |
| 2.61633e-07  | P2RY10   | ASC IgM | 0.513 | 0.511 | 0.004664654 | 23 |
| 2.702427e-07 | C6orf48  | ASC IgM | 0.318 | 0.106 | 0.004818158 | 23 |
| 3.166735e-07 | E2F5     | ASC IgM | 0.065 | 0.12  | 0.005645971 | 23 |
| 3.231115e-07 | IL27RA   | ASC IgM | 0.76  | 0.394 | 0.005760755 | 23 |
| 3.49785e-07  | CSTB     | ASC IgM | 0.439 | 0.184 | 0.006236317 | 23 |
| 3.773244e-07 | P2RX5    | ASC IgM | 0.638 | 0.601 | 0.006727317 | 23 |
| 4.210159e-07 | UBXN1    | ASC IgM | 0.056 | 0.112 | 0.007506293 | 23 |
| 4.21691e-07  | SESN3    | ASC IgM | 0.374 | 0.427 | 0.007518328 | 23 |
| 4.377606e-07 | PLP2     | ASC IgM | 0.804 | 0.752 | 0.007804834 | 23 |
| 5.705547e-07 | TOMM7    | ASC IgM | 0.994 | 0.982 | 0.01017242  | 23 |
| 5.848843e-07 | MT-CO3   | ASC IgM | 0.249 | 0.29  | 0.0104279   | 23 |

|              |         |         |       |       |            |    |
|--------------|---------|---------|-------|-------|------------|----|
| 6.083026e-07 | RPA2    | ASC IgM | 0.288 | 0.315 | 0.01084543 | 23 |
| 6.092431e-07 | STRBP   | ASC IgM | 0.125 | 0.185 | 0.01086219 | 23 |
| 6.958906e-07 | FKBP4   | ASC IgM | 0.157 | 0.188 | 0.01240703 | 23 |
| 7.052733e-07 | PCNA    | ASC IgM | 0.101 | 0.152 | 0.01257432 | 23 |
| 8.351513e-07 | SCAF4   | ASC IgM | 0.647 | 0.61  | 0.01488991 | 23 |
| 9.800262e-07 | RSL24D1 | ASC IgM | 0.837 | 0.747 | 0.01747289 | 23 |
| 1.19823e-06  | RAN     | ASC IgM | 0.967 | 0.899 | 0.02136325 | 23 |
| 1.285392e-06 | PFN1    | ASC IgM | 0.409 | 0.178 | 0.02291726 | 23 |
| 1.334364e-06 | LCK     | ASC IgM | 0.641 | 0.602 | 0.02379038 | 23 |
| 1.351356e-06 | ARF6    | ASC IgM | 0.089 | 0.128 | 0.02409333 | 23 |
| 1.456244e-06 | CCNG2   | ASC IgM | 0.255 | 0.296 | 0.02596337 | 23 |
| 1.633144e-06 | NFKBIA  | ASC IgM | 0.733 | 0.677 | 0.02911733 | 23 |
| 1.723363e-06 | EIF3L   | ASC IgM | 0.401 | 0.389 | 0.03072584 | 23 |
| 1.851204e-06 | ARL6IP5 | ASC IgM | 0.05  | 0.105 | 0.03300511 | 23 |
| 1.996764e-06 | SCIMP   | ASC IgM | 0.665 | 0.587 | 0.03560031 | 23 |
| 2.189484e-06 | HNRNPF  | ASC IgM | 0.377 | 0.368 | 0.03903632 | 23 |
| 2.285422e-06 | MEAF6   | ASC IgM | 0.208 | 0.057 | 0.04074678 | 23 |
| 2.434744e-06 | RGS16   | ASC IgM | 0.466 | 0.397 | 0.04340905 | 23 |
| 2.750154e-06 | NUCKS1  | ASC IgM | 0.804 | 0.695 | 0.04903249 | 23 |
| 2.755182e-06 | H2AFZ   | ASC IgM | 0.789 | 0.735 | 0.04912214 | 23 |
| 2.855063e-06 | HSPA8   | ASC IgM | 0.122 | 0.174 | 0.05090292 | 23 |
| 3.025457e-06 | NUDT1   | ASC IgM | 0.347 | 0.353 | 0.05394087 | 23 |
| 3.043497e-06 | TUBB4B  | ASC IgM | 0.478 | 0.456 | 0.0542625  | 23 |
| 3.294525e-06 | LSM5    | ASC IgM | 0.107 | 0.141 | 0.05873809 | 23 |
| 3.30169e-06  | SMC2    | ASC IgM | 0.122 | 0.157 | 0.05886583 | 23 |

|              |             |         |            |       |       |            |    |
|--------------|-------------|---------|------------|-------|-------|------------|----|
| 3.369004e-06 | BCL7C       | ASC IgM | -0.3776383 | 0.166 | 0.186 | 0.06006597 | 23 |
| 3.492838e-06 | CDCA7L      | ASC IgM | -0.3725188 | 0.157 | 0.22  | 0.06227381 | 23 |
| 3.823457e-06 | NELFCD      | ASC IgM | -0.4148369 | 0.243 | 0.247 | 0.06816842 | 23 |
| 4.106501e-06 | CSK         | ASC IgM | -0.4658897 | 0.294 | 0.314 | 0.0732148  | 23 |
| 5.319571e-06 | SPI1        | ASC IgM | -0.400494  | 0.166 | 0.19  | 0.09484263 | 23 |
| 5.778028e-06 | NUP88       | ASC IgM | -0.6226443 | 0.635 | 0.593 | 0.1030165  | 23 |
| 6.289111e-06 | HNRNPU      | ASC IgM | -0.4224103 | 0.217 | 0.222 | 0.1121286  | 23 |
| 6.530433e-06 | THUMPD3-AS1 | ASC IgM | -0.4572263 | 0.172 | 0.194 | 0.1164311  | 23 |
| 6.683507e-06 | ADK         | ASC IgM | -0.48281   | 0.353 | 0.349 | 0.1191603  | 23 |
| 6.808389e-06 | NASP        | ASC IgM | -0.4405996 | 0.214 | 0.228 | 0.1213868  | 23 |
| 6.8976e-06   | PCSK7       | ASC IgM | -0.4769655 | 0.217 | 0.226 | 0.1229773  | 23 |
| 7.14467e-06  | MCM5        | ASC IgM | -0.8635768 | 0.487 | 0.494 | 0.1273823  | 23 |
| 7.551689e-06 | FXVD5       | ASC IgM | -0.7090647 | 0.338 | 0.36  | 0.1346391  | 23 |
| 7.851316e-06 | ARID5B      | ASC IgM | -0.4216404 | 0.326 | 0.299 | 0.1399811  | 23 |
| 7.973395e-06 | ITSN2       | ASC IgM | -0.3827737 | 0.065 | 0.117 | 0.1421577  | 23 |
| 9.727612e-06 | SLAMF1      | ASC IgM | 1.247869   | 0.24  | 0.147 | 0.1734336  | 23 |
| 1.036976e-05 | IGHA1       | ASC IgM | -1.208876  | 0.231 | 0.287 | 0.1848825  | 23 |
| 1.047533e-05 | MIR155HG    | ASC IgM | -0.3685926 | 0.104 | 0.151 | 0.1867646  | 23 |
| 1.126103e-05 | ATF1        | ASC IgM | 0.3249591  | 0.134 | 0.055 | 0.200773   | 23 |
| 1.131148e-05 | HES1        | ASC IgM | -0.4223584 | 0.202 | 0.235 | 0.2016724  | 23 |
| 1.142644e-05 | FNTA        | ASC IgM | -0.6295014 | 0.674 | 0.583 | 0.203722   | 23 |
| 1.234478e-05 | ANP32B      | ASC IgM | -0.4955161 | 0.267 | 0.277 | 0.2200951  | 23 |
| 1.287419e-05 | CCNG1       | ASC IgM | -0.4920475 | 0.16  | 0.194 | 0.229534   | 23 |
| 1.333879e-05 | HSPB1       | ASC IgM | -0.3037759 | 0.053 | 0.107 | 0.2378174  | 23 |
| 1.460594e-05 | TP53        | ASC IgM | -0.3501918 | 0.077 | 0.121 | 0.2604093  | 23 |

|              |            |         |            |       |       |           |    |
|--------------|------------|---------|------------|-------|-------|-----------|----|
| 1.525967e-05 | NBEAL1     | ASC IgM | -0.5725757 | 0.436 | 0.422 | 0.2720647 | 23 |
| 1.664859e-05 | APEX1      | ASC IgM | -0.3867041 | 0.062 | 0.129 | 0.2968277 | 23 |
| 1.981454e-05 | EEA1       | ASC IgM | -0.5742776 | 0.721 | 0.625 | 0.3532735 | 23 |
| 1.990926e-05 | HNRNPA0    | ASC IgM | -0.4466444 | 0.107 | 0.169 | 0.3549621 | 23 |
| 2.175969e-05 | TNIP2      | ASC IgM | -0.4124009 | 0.071 | 0.133 | 0.3879536 | 23 |
| 2.180362e-05 | SULF2      | ASC IgM | -0.4297973 | 0.11  | 0.145 | 0.3887368 | 23 |
| 2.239813e-05 | SUN2       | ASC IgM | -1.373387  | 0.24  | 0.216 | 0.3993362 | 23 |
| 2.32184e-05  | IGHG1      | ASC IgM | -0.5931845 | 0.76  | 0.679 | 0.4139609 | 23 |
| 2.370934e-05 | SRSF3      | ASC IgM | -0.4171396 | 0.077 | 0.118 | 0.4227138 | 23 |
| 2.510637e-05 | FCGR2B     | ASC IgM | -0.4285463 | 0.142 | 0.181 | 0.4476215 | 23 |
| 2.558419e-05 | CDC42SE1   | ASC IgM | -0.5281114 | 0.404 | 0.377 | 0.4561406 | 23 |
| 2.597769e-05 | ZFAND6     | ASC IgM | -0.513642  | 0.445 | 0.421 | 0.4631563 | 23 |
| 2.796818e-05 | SCAF11     | ASC IgM | -0.385751  | 0.953 | 0.901 | 0.4986447 | 23 |
| 2.912932e-05 | COX7C      | ASC IgM | -1.158577  | 0.537 | 0.45  | 0.5193467 | 23 |
| 2.926097e-05 | IGHG3      | ASC IgM | -0.5237649 | 0.407 | 0.367 | 0.5216938 | 23 |
| 3.084609e-05 | CACYBP     | ASC IgM | -0.3035564 | 0.089 | 0.124 | 0.5499549 | 23 |
| 3.136057e-05 | MAPK1      | ASC IgM | -0.4390833 | 0.237 | 0.253 | 0.5591277 | 23 |
| 3.166306e-05 | SLC50A1    | ASC IgM | -0.4542915 | 0.19  | 0.237 | 0.5645207 | 23 |
| 3.173559e-05 | AC004687.1 | ASC IgM | -0.4093079 | 0.211 | 0.222 | 0.5658138 | 23 |
| 3.274139e-05 | CDC40      | ASC IgM | -0.5217446 | 0.089 | 0.158 | 0.5837462 | 23 |
| 3.335965e-05 | SLC2A3     | ASC IgM | -0.3503528 | 0.116 | 0.145 | 0.5947693 | 23 |
| 3.382912e-05 | GNB5       | ASC IgM | 0.3359202  | 0.374 | 0.133 | 0.6031394 | 23 |
| 3.477464e-05 | NEIL1      | ASC IgM | -0.4697145 | 0.226 | 0.26  | 0.6199971 | 23 |
| 3.615757e-05 | NAA50      | ASC IgM | -0.4391557 | 0.16  | 0.209 | 0.6446533 | 23 |
| 3.680967e-05 | LARS       | ASC IgM | -0.567665  | 0.674 | 0.62  | 0.6562797 | 23 |

|         |         |              |            |       |       |           |    |
|---------|---------|--------------|------------|-------|-------|-----------|----|
| ACTR3   | ASC IgM | 3.706173e-05 | -0.3837437 | 0.116 | 0.155 | 0.6607736 | 23 |
| TCOF1   | ASC IgM | 4.176748e-05 | -0.324414  | 0.125 | 0.161 | 0.7446725 | 23 |
| DNAJC9  | ASC IgM | 4.862105e-05 | -0.4857892 | 0.122 | 0.171 | 0.8668648 | 23 |
| PARP14  | ASC IgM | 4.877485e-05 | -0.5319643 | 0.166 | 0.199 | 0.8696068 | 23 |
| PPP3CA  | ASC IgM | 4.986523e-05 | -0.3230595 | 0.223 | 0.234 | 0.8890472 | 23 |
| ZCCHC7  | ASC IgM | 5.047624e-05 | -0.3566427 | 0.255 | 0.239 | 0.8999408 | 23 |
| SP140   | ASC IgM | 5.249586e-05 | -0.465162  | 0.783 | 0.718 | 0.9359487 | 23 |
| ATP5MC2 | ASC IgM | 5.256076e-05 | -0.656351  | 0.623 | 0.604 | 0.9371057 | 23 |
| CDC42   | ASC IgM | 5.268435e-05 | -0.3847093 | 0.335 | 0.309 | 0.9393093 | 23 |
| PGLS    | ASC IgM | 5.273889e-05 | -0.3117206 | 0.389 | 0.363 | 0.9402817 | 23 |
| RCS1    | ASC IgM | 5.610629e-05 | -0.6032807 | 0.703 | 0.615 | 1         | 23 |
| SERBP1  | ASC IgM | 5.723468e-05 | -0.3887023 | 0.068 | 0.123 | 1         | 23 |
| RAB13   | ASC IgM | 5.893958e-05 | -0.5141255 | 0.338 | 0.343 | 1         | 23 |
| CMTM6   | ASC IgM | 6.693259e-05 | -0.5141645 | 0.659 | 0.586 | 1         | 23 |
| PRR13   | ASC IgM | 6.790018e-05 | -0.5810037 | 0.469 | 0.442 | 1         | 23 |
| CCT6A   | ASC IgM | 8.222563e-05 | -0.3896122 | 0.136 | 0.16  | 1         | 23 |
| AIDA    | ASC IgM | 8.69344e-05  | -0.3675009 | 0.181 | 0.192 | 1         | 23 |
| CNTRL   | ASC IgM | 8.771694e-05 | -0.4878629 | 0.273 | 0.282 | 1         | 23 |
| RTN4    | ASC IgM | 8.922445e-05 | -0.4250853 | 0.979 | 0.959 | 1         | 23 |
| CYB     | ASC IgM | 9.33445e-05  | -0.3361988 | 0.148 | 0.179 | 1         | 23 |
| CBX1    | ASC IgM | 9.379171e-05 | -0.5724099 | 0.555 | 0.533 | 1         | 23 |
| RBMX    | ASC IgM | 9.431516e-05 | -0.3707125 | 0.098 | 0.142 | 1         | 23 |
| NUB1    | ASC IgM | 9.745869e-05 | -0.3620495 | 0.131 | 0.143 | 1         | 23 |
| DUSP1   | ASC IgM | 0.0001004379 | -0.5239977 | 0.593 | 0.478 | 1         | 23 |
| CD47    | ASC IgM | 0.0001059281 | -0.4352638 | 0.252 | 0.246 | 1         | 23 |

MT-



|            |         |              |            |       |       |   |    |             |
|------------|---------|--------------|------------|-------|-------|---|----|-------------|
| CKS1B      | ASC IgM | 0.0001068155 | -0.3659562 | 0.104 | 0.095 | 1 | 23 |             |
| PCLAF      | ASC IgM | 0.0001076737 | -0.4242545 | 0.217 | 0.248 | 1 | 23 |             |
| HNRNPA1P48 | ASC IgM | 0.0001125321 | -0.40776   | 0.178 | 0.185 | 1 | 23 | ANKRD44 ASC |
|            | IgM     | 0.0001163596 | -0.5477672 | 0.591 | 0.524 | 1 | 23 |             |
| SYF2       | ASC IgM | 0.0001201903 | -0.330789  | 0.101 | 0.134 | 1 | 23 |             |
| TTF1       | ASC IgM | 0.0001204476 | -0.300377  | 0.053 | 0.102 | 1 | 23 |             |
| PAXX       | ASC IgM | 0.0001343401 | -0.3987385 | 0.119 | 0.15  | 1 | 23 |             |
| ESYT1      | ASC IgM | 0.000136447  | -0.3604096 | 0.089 | 0.114 | 1 | 23 |             |
| CLN8       | ASC IgM | 0.0001405985 | -0.3417753 | 0.172 | 0.173 | 1 | 23 |             |
| BLCAP      | ASC IgM | 0.0001411948 | -0.3789547 | 0.172 | 0.193 | 1 | 23 |             |
| UTP6       | ASC IgM | 0.0001462724 | -0.4523223 | 0.869 | 0.817 | 1 | 23 |             |
| SEPT7      | ASC IgM | 0.0001537413 | -0.5501785 | 0.709 | 0.635 | 1 | 23 |             |
| GPX4       | ASC IgM | 0.0001612673 | -0.3784957 | 0.119 | 0.158 | 1 | 23 |             |
| TGIF1      | ASC IgM | 0.0001783567 | -0.5540455 | 0.733 | 0.64  | 1 | 23 |             |
| HNRNPM     | ASC IgM | 0.0001791111 | -0.3637744 | 0.178 | 0.202 | 1 | 23 |             |
| BIN1       | ASC IgM | 0.0001795569 | -0.4121884 | 0.777 | 0.662 | 1 | 23 | DBI         |
|            | ASC IgM | 0.0001949321 | -0.3487747 | 0.226 | 0.233 | 1 | 23 |             |
| ZNF581     | ASC IgM | 0.0002100632 | -0.5472876 | 0.166 | 0.198 | 1 | 23 |             |
| YBX3       | ASC IgM | 0.0002147282 | -0.3282357 | 0.427 | 0.33  | 1 | 23 |             |
| GRHPR      | ASC IgM | 0.0002183556 | -0.5142081 | 0.828 | 0.722 | 1 | 23 |             |
| SRSF5      | ASC IgM | 0.0002198222 | -0.3450427 | 0.101 | 0.152 | 1 | 23 |             |
| PEA15      | ASC IgM | 0.0002227006 | -0.5513391 | 0.475 | 0.445 | 1 | 23 | FBL         |
|            | ASC IgM | 0.000241423  | -0.4091991 | 0.205 | 0.219 | 1 | 23 |             |
| PCM1       | ASC IgM | 0.0002820033 | -0.3243369 | 0.211 | 0.235 | 1 | 23 |             |
| KRAS       | ASC IgM | 0.0002881956 | -0.5467576 | 0.65  | 0.564 | 1 | 23 |             |

|          |     |     |              |            |       |       |   |    |      |     |
|----------|-----|-----|--------------|------------|-------|-------|---|----|------|-----|
| SNRPB    | ASC | IgM | 0.0002932529 | -0.3202859 | 0.125 | 0.147 | 1 | 23 |      |     |
| ARL6IP6  | ASC | IgM | 0.0002945458 | -0.4724399 | 0.659 | 0.594 | 1 | 23 |      |     |
| ST13     | ASC | IgM | 0.0002960065 | -0.3861933 | 0.73  | 0.652 | 1 | 23 |      |     |
| HLA-DQA1 | ASC | IgM | 0.0003248931 | -0.3999219 | 0.22  | 0.219 | 1 | 23 |      |     |
| CCDC50   | ASC | IgM | 0.0003513409 | -0.5317291 | 0.662 | 0.568 | 1 | 23 |      |     |
| PCBP2    | ASC | IgM | 0.0003797016 | -0.4573858 | 0.445 | 0.407 | 1 | 23 |      |     |
| BANF1    | ASC | IgM | 0.0004033937 | -0.3188776 | 0.157 | 0.161 | 1 | 23 |      |     |
| TMPO     | ASC | IgM | 0.0004150583 | -0.406729  | 0.893 | 0.798 | 1 | 23 |      |     |
| SUM02    | ASC | IgM | 0.0004447984 | -0.4338899 | 0.125 | 0.18  | 1 | 23 |      |     |
| RHOF     | ASC | IgM | 0.0004991233 | -0.3715878 | 0.386 | 0.346 | 1 | 23 |      |     |
| LSM6     | ASC | IgM | 0.0005036017 | -0.3563525 | 0.184 | 0.193 | 1 | 23 |      |     |
| TFAM     | ASC | IgM | 0.000514175  | -0.4664936 | 0.35  | 0.336 | 1 | 23 |      |     |
| ACAT2    | ASC | IgM | 0.0005184261 | -0.3499465 | 0.175 | 0.188 | 1 | 23 |      |     |
| CELF1    | ASC | IgM | 0.0005303168 | -0.3624928 | 0.208 | 0.212 | 1 | 23 |      |     |
| NR3C1    | ASC | IgM | 0.0005481476 | -0.3044485 | 0.139 | 0.154 | 1 | 23 |      |     |
| PPIH     | ASC | IgM | 0.0005627615 | -0.4799451 | 0.3   | 0.237 | 1 | 23 |      |     |
| CD55     | ASC | IgM | 0.0005775741 | -0.3347557 | 0.122 | 0.133 | 1 | 23 |      |     |
| ODF2L    | ASC | IgM | 0.0005883223 | -0.3846848 | 0.211 | 0.238 | 1 | 23 |      |     |
| NT5C     | ASC | IgM | 0.000589706  | -0.3930857 | 0.196 | 0.208 | 1 | 23 |      |     |
| PITHD1   | ASC | IgM | 0.0005934752 | -0.3252505 | 0.116 | 0.15  | 1 | 23 |      |     |
| ADSS     | ASC | IgM | 0.0006171748 | -0.3515333 | 0.178 | 0.193 | 1 | 23 |      |     |
| GGCT     | ASC | IgM | 0.0006310537 | -0.4192156 | 0.472 | 0.397 | 1 | 23 |      |     |
| ORAI2    | ASC | IgM | 0.000655628  | -0.4075712 | 0.338 | 0.301 | 1 | 23 |      |     |
| ARID4B   | ASC | IgM | 0.000697033  | -0.6504    | 0.347 | 0.345 | 1 | 23 | CAST | ASC |
|          |     | IgM | 0.000720377  | -0.4071819 | 0.184 | 0.195 | 1 | 23 |      |     |

|          |     |     |              |            |       |       |   |    |     |
|----------|-----|-----|--------------|------------|-------|-------|---|----|-----|
| CLEC2B   | ASC | IgM | 0.0007205183 | -0.3450851 | 0.335 | 0.296 | 1 | 23 |     |
| IFT57    | ASC | IgM | 0.0007504885 | -0.3217203 | 0.599 | 0.407 | 1 | 23 | TXN |
|          | ASC | IgM | 0.0008113222 | -0.3579721 | 0.653 | 0.588 | 1 | 23 |     |
| MARCKSL1 | ASC | IgM | 0.0008192869 | -0.4454395 | 0.282 | 0.29  | 1 | 23 |     |
| DCTPP1   | ASC | IgM | 0.0008369003 | -0.4525243 | 0.555 | 0.465 | 1 | 23 |     |
| PRDX6    | ASC | IgM | 0.0008653597 | -0.4278096 | 0.166 | 0.211 | 1 | 23 |     |
| C19orf48 | ASC | IgM | 0.0009023926 | -0.3715596 | 0.145 | 0.183 | 1 | 23 |     |
| TUBA1C   | ASC | IgM | 0.000963737  | -0.307238  | 0.151 | 0.162 | 1 | 23 |     |
| WDR77    | ASC | IgM | 0.0009690042 | -0.4557402 | 0.439 | 0.365 | 1 | 23 |     |
| HADHA    | ASC | IgM | 0.001029403  | -0.4520252 | 0.255 | 0.246 | 1 | 23 |     |
| DKC1     | ASC | IgM | 0.001047416  | -0.4169746 | 0.214 | 0.211 | 1 | 23 |     |
| FMNL1    | ASC | IgM | 0.001056453  | -0.4191438 | 0.315 | 0.299 | 1 | 23 |     |
| CAMLG    | ASC | IgM | 0.001181139  | -0.4070784 | 0.445 | 0.379 | 1 | 23 |     |
| POLR2G   | ASC | IgM | 0.001187241  | -0.3407457 | 0.264 | 0.229 | 1 | 23 | ATM |
|          | ASC | IgM | 0.001258884  | -0.4331863 | 0.65  | 0.571 | 1 | 23 |     |
| EIF3D    | ASC | IgM | 0.001313092  | -0.3629141 | 0.344 | 0.302 | 1 | 23 |     |
| HNRNPH3  | ASC | IgM | 0.001328132  | -0.4836242 | 0.501 | 0.44  | 1 | 23 |     |
| ACTR2    | ASC | IgM | 0.001346703  | -0.3820205 | 0.35  | 0.313 | 1 | 23 |     |
| ATP2B1   | ASC | IgM | 0.001355812  | -0.3625895 | 0.478 | 0.347 | 1 | 23 |     |
| S100A10  | ASC | IgM | 0.001386066  | -0.5290321 | 0.685 | 0.571 | 1 | 23 |     |
| SNRPE    | ASC | IgM | 0.001473966  | -0.4829368 | 0.496 | 0.42  | 1 | 23 |     |
| MAGOH    | ASC | IgM | 0.001521143  | -0.3804135 | 0.736 | 0.602 | 1 | 23 |     |
| LSM7     | ASC | IgM | 0.001609205  | -0.3587402 | 0.917 | 0.83  | 1 | 23 |     |
| UQCRB    | ASC | IgM | 0.001647819  | -0.3186164 | 0.211 | 0.19  | 1 | 23 |     |
| USP1     | ASC | IgM | 0.001668675  | -0.3490931 | 0.139 | 0.165 | 1 | 23 |     |

|          |     |     |             |            |       |       |   |    |
|----------|-----|-----|-------------|------------|-------|-------|---|----|
| NFKB1    | ASC | IgM | 0.001689374 | -0.3552766 | 0.294 | 0.236 | 1 | 23 |
| CCND3    | ASC | IgM | 0.001733462 | -0.5970845 | 0.19  | 0.21  | 1 | 23 |
| MGST3    | ASC | IgM | 0.001739252 | -0.3167073 | 0.107 | 0.133 | 1 | 23 |
| MCMBP    | ASC | IgM | 0.001741624 | -0.3248902 | 0.288 | 0.262 | 1 | 23 |
| ATXN10   | ASC | IgM | 0.001826959 | -0.3275018 | 0.276 | 0.264 | 1 | 23 |
| CD22     | ASC | IgM | 0.001860105 | -0.5372936 | 0.706 | 0.61  | 1 | 23 |
| PTGES3   | ASC | IgM | 0.001860511 | -0.4854675 | 0.377 | 0.333 | 1 | 23 |
|          | ASC | IgM | 0.001909721 | -0.3836662 | 0.478 | 0.414 | 1 | 23 |
| HDAC1    | ASC | IgM | 0.001941368 | -0.3684594 | 0.341 | 0.283 | 1 | 23 |
| MTPN     | ASC | IgM | 0.001950271 | -0.4390965 | 0.178 | 0.202 | 1 | 23 |
| NPM3     | ASC | IgM | 0.001985662 | -0.5040763 | 0.326 | 0.283 | 1 | 23 |
| GNG7     | ASC | IgM | 0.002029653 | -0.3045315 | 0.116 | 0.122 | 1 | 23 |
| SP140L   | ASC | IgM | 0.002276304 | -0.5039203 | 0.644 | 0.529 | 1 | 23 |
| SRSF7    | ASC | IgM | 0.002280596 | 0.3894417  | 0.371 | 0.217 | 1 | 23 |
| ISG15    | ASC | IgM | 0.002312417 | -0.3824362 | 0.217 | 0.205 | 1 | 23 |
| RECQL    | ASC | IgM | 0.002481831 | -0.4319604 | 0.852 | 0.745 | 1 | 23 |
| SNRPD2   | ASC | IgM | 0.002499933 | -0.4630397 | 0.626 | 0.559 | 1 | 23 |
| YWHAZ    | ASC | IgM | 0.002505235 | -0.3085513 | 0.196 | 0.189 | 1 | 23 |
| OARD1    | ASC | IgM | 0.00260854  | -0.3523089 | 0.116 | 0.143 | 1 | 23 |
| NOP16    | ASC | IgM | 0.00277242  | -0.3470858 | 0.169 | 0.171 | 1 | 23 |
| MFSD10   | ASC | IgM | 0.002821604 | -0.5736345 | 0.647 | 0.605 | 1 | 23 |
| PPDPF    | ASC | IgM | 0.002840378 | -0.3292883 | 0.297 | 0.26  | 1 | 23 |
| MAT2B    | ASC | IgM | 0.002861665 | -0.4991898 | 0.671 | 0.594 | 1 | 23 |
| SRSF2    | ASC | IgM | 0.002896635 | -0.5206697 | 0.353 | 0.336 | 1 | 23 |
| APOBEC3C | ASC | IgM | 0.003061878 | -0.3843381 | 0.211 | 0.235 | 1 | 23 |

BTK

|           |     |     |             |            |       |       |   |    |     |
|-----------|-----|-----|-------------|------------|-------|-------|---|----|-----|
| CNPPD1    | ASC | IgM | 0.003091529 | -0.3479015 | 0.347 | 0.299 | 1 | 23 |     |
| POLE4     | ASC | IgM | 0.003323594 | -0.3484689 | 0.677 | 0.577 | 1 | 23 |     |
| POU2F2    | ASC | IgM | 0.003330416 | -0.3737366 | 0.234 | 0.222 | 1 | 23 | GCA |
|           | ASC | IgM | 0.003344985 | -0.3610185 | 0.22  | 0.217 | 1 | 23 |     |
| ITGB1BP1  | ASC | IgM | 0.003539118 | -0.3442552 | 0.217 | 0.217 | 1 | 23 |     |
| HPRT1     | ASC | IgM | 0.003686077 | -0.4104912 | 0.318 | 0.285 | 1 | 23 |     |
| CNPY3     | ASC | IgM | 0.004046416 | -0.3758639 | 0.727 | 0.631 | 1 | 23 |     |
| EIF3H     | ASC | IgM | 0.00407383  | -0.4756896 | 0.475 | 0.429 | 1 | 23 |     |
| NSA2      | ASC | IgM | 0.004138862 | -0.3808027 | 0.611 | 0.514 | 1 | 23 |     |
| SRP9      | ASC | IgM | 0.004144078 | -0.531976  | 0.567 | 0.452 | 1 | 23 |     |
| ARL6IP1   | ASC | IgM | 0.004153509 | -0.6193495 | 0.92  | 0.848 | 1 | 23 |     |
| HSP90AB1  | ASC | IgM | 0.004170621 | -0.3983152 | 0.383 | 0.324 | 1 | 23 |     |
| AKR1B1    | ASC | IgM | 0.004184357 | -0.3642569 | 0.148 | 0.184 | 1 | 23 |     |
| KANSL1    | ASC | IgM | 0.004246393 | -0.4724984 | 0.528 | 0.451 | 1 | 23 |     |
| PCNP      | ASC | IgM | 0.004331625 | -0.3378365 | 0.134 | 0.151 | 1 | 23 |     |
| HCFC1R1   | ASC | IgM | 0.004519178 | -0.3715889 | 0.208 | 0.189 | 1 | 23 |     |
| CWF19L2   | ASC | IgM | 0.004603989 | -0.3446625 | 0.211 | 0.204 | 1 | 23 |     |
| AP1S2     | ASC | IgM | 0.004608614 | -0.4995001 | 0.537 | 0.449 | 1 | 23 |     |
| DRAP1     | ASC | IgM | 0.004683183 | -0.3634345 | 0.546 | 0.421 | 1 | 23 |     |
| TMEM123   | ASC | IgM | 0.004687753 | -0.3138221 | 0.136 | 0.147 | 1 | 23 |     |
| TSPAN3    | ASC | IgM | 0.005113542 | -0.3446776 | 0.128 | 0.163 | 1 | 23 |     |
| FAM215B   | ASC | IgM | 0.005290425 | -0.3583733 | 0.312 | 0.289 | 1 | 23 |     |
| PFDN4     | ASC | IgM | 0.005491704 | -0.3450236 | 0.401 | 0.32  | 1 | 23 |     |
| TNFRSF13C | ASC | IgM | 0.00551081  | -0.332958  | 0.252 | 0.236 | 1 | 23 |     |
| TPRKB     | ASC | IgM | 0.0055274   | -0.3008146 | 0.128 | 0.151 | 1 | 23 |     |

|           |     |     |               |            |       |       |               |    |              |
|-----------|-----|-----|---------------|------------|-------|-------|---------------|----|--------------|
| CTNNB1    | ASC | IgM | 0.005951125   | -1.691197  | 0.273 | 0.125 | 1             | 23 |              |
| IGHG2     | ASC | IgM | 0.006324488   | -0.4355254 | 0.528 | 0.445 | 1             | 23 |              |
| YWHAQ     | ASC | IgM | 0.00687435    | -0.3604107 | 0.329 | 0.253 | 1             | 23 |              |
| PRMT2     | ASC | IgM | 0.00703687    | -0.3369263 | 0.546 | 0.458 | 1             | 23 |              |
| RAP1B     | ASC | IgM | 0.007125975   | -0.4886732 | 0.243 | 0.248 | 1             | 23 |              |
| TNFRSF13B | ASC | IgM | 0.00717598    | -0.3265819 | 0.941 | 0.895 | 1             | 23 |              |
| SLC25A6   | ASC | IgM | 0.007744853   | -0.4907134 | 0.412 | 0.391 | 1             | 23 |              |
| ARPC5L    | ASC | IgM | 0.00794115    | -0.3212071 | 0.226 | 0.207 | 1             | 23 |              |
| ARHGAP30  | ASC | IgM | 0.008220243   | -0.360943  | 0.356 | 0.311 | 1             | 23 |              |
| MZT2A     | ASC | IgM | 0.008263147   | -0.4973279 | 0.279 | 0.282 | 1             | 23 | MT-          |
| ND4L      | ASC | IgM | 0.008492003   | -0.3107619 | 0.395 | 0.297 | 1             | 23 |              |
| GGA2      | ASC | IgM | 0.008719391   | -0.3756258 | 0.703 | 0.565 | 1             | 23 |              |
| RAC1      | ASC | IgM | 0.008835453   | -0.3094922 | 0.323 | 0.254 | 1             | 23 |              |
| ZCCHC10   | ASC | IgM | 0.009170721   | -0.3755177 | 0.436 | 0.344 | 1             | 23 | PNN          |
|           | ASC | IgM | 0.009406538   | -0.3301983 | 0.392 | 0.333 | 1             | 23 |              |
| DARS      | ASC | IgM | 0.009455744   | -0.362042  | 0.282 | 0.264 | 1             | 23 |              |
| MRPL11    | ASC | IgM | 0.009551164   | -0.3069954 | 0.166 | 0.156 | 1             | 23 |              |
| DDB2      | ASC | IgM | 0.009714137   | -0.3014084 | 0.208 | 0.173 | 1             | 23 |              |
| CDK13     | ASC | IgM | 0             | 3.466277   | 1     | 0.068 | 0             | 24 | IGHA2 GC IgA |
|           |     |     | 3.296026e-218 | 2.306851   | 0.95  | 0.142 | 5.876484e-214 | 24 |              |
| IGHA1     | GC  | IgA | 4.859058e-209 | 1.417603   | 1     | 0.933 | 8.663215e-205 | 24 |              |
| SERF2     | GC  | IgA | 9.509469e-163 | 1.327696   | 1     | 0.813 | 1.695443e-158 | 24 |              |
| COR01A    | GC  | IgA | 4.462341e-157 | 1.340538   | 0.994 | 0.85  | 7.955907e-153 | 24 |              |
| ATP5MG    | GC  | IgA | 1.0005e-147   | 1.523805   | 0.988 | 0.784 | 1.783792e-143 | 24 |              |
| ACTG1     | GC  | IgA | 7.444464e-146 | 1.18831    | 1     | 0.99  | 1.327274e-141 | 24 |              |
| ACTB      | GC  | IgA |               |            |       |       |               |    |              |

|                 |           |       |       |               |               |     |
|-----------------|-----------|-------|-------|---------------|---------------|-----|
| 1.166327e-137   | 1.732708  | 0.892 | 0.201 | 2.079445e-133 | 24            |     |
| RGS13 GC IgA    |           |       |       |               |               |     |
| 6.464703e-127   | 1.637297  | 0.941 | 0.586 | 1.152592e-122 | 24            |     |
| MARCKSL1 GC IgA |           |       |       |               |               |     |
| 6.988778e-122   | 1.315136  | 0.981 | 0.766 | 1.246029e-117 | 24            |     |
| HMGN1 GC IgA    |           |       |       |               |               |     |
| 2.202481e-113   | 1.622314  | 0.923 | 0.486 | 3.926803e-109 | 24            | LTB |
| GC IgA          |           |       |       |               |               |     |
| 1.61587e-111    | 1.16181   | 0.981 | 0.723 | 2.880935e-107 | 24            |     |
| LIMD2 GC IgA    |           |       |       |               |               |     |
| 7.939084e-109   | 1.353054  | 0.848 | 0.285 | 1.415459e-104 | 24            |     |
| BCAS4 GC IgA    |           |       |       |               |               |     |
| 8.859023e-109   | 0.9891474 |       | 0.991 | 0.869         | 1.579475e-104 | 24  |
| ARPC2 GC IgA    |           |       |       |               |               |     |
| 4.877062e-108   | 1.464179  | 0.7   | 0.13  | 8.695314e-104 | 24            |     |
| NEIL1 GC IgA    |           |       |       |               |               |     |
| 3.448359e-104   | 1.205433  | 0.969 | 0.692 | 6.148079e-100 | 24            | EZR |
| GC IgA          |           |       |       |               |               |     |
| 1.971424e-103   | 1.224072  | 0.972 | 0.653 | 3.514851e-99  | 24            |     |
| TCL1A GC IgA    |           |       |       |               |               |     |
| 2.771639e-102   | 1.539444  | 0.567 | 0.075 | 4.941556e-98  | 24            |     |
| SUGCT GC IgA    |           |       |       |               |               |     |
| 2.461569e-99    | 1.054299  | 0.991 | 0.887 | 4.388731e-95  | 24            |     |
| GAPDH GC IgA    |           |       |       |               |               |     |
| 5.547064e-99    | 1.283062  | 0.87  | 0.394 | 9.889861e-95  | 24            |     |
| BASP1 GC IgA    |           |       |       |               |               |     |
| 1.059741e-98    | 1.256541  | 0.449 | 0.05  | 1.889412e-94  | 24            |     |
| SERPINA9 GC IgA |           |       |       |               |               |     |
| 2.36297e-97     | 0.8541608 |       | 1     | 0.989         | 4.212939e-93  | 24  |
| CD74 GC IgA     |           |       |       |               |               |     |
| 1.000857e-96    | 1.433105  | 0.858 | 0.414 | 1.784427e-92  | 24            |     |
| METAP2 GC IgA   |           |       |       |               |               |     |
| 6.27109e-96     | 1.266697  | 0.848 | 0.372 | 1.118073e-91  | 24            |     |
| ACADM GC IgA    |           |       |       |               |               |     |
| 6.60324e-94     | 1.200183  | 0.95  | 0.55  | 1.177292e-89  | 24            |     |
| TCEA1 GC IgA    |           |       |       |               |               |     |
| 1.481473e-93    | 0.9155987 |       | 0.988 | 0.856         | 2.641318e-89  | 24  |
| CD79B GC IgA    |           |       |       |               |               |     |
| 1.589468e-92    | 1.381437  | 0.625 | 0.117 | 2.833863e-88  | 24            | LPP |
| GC IgA          |           |       |       |               |               |     |
| 9.50314e-91     | 1.309068  | 0.904 | 0.531 | 1.694315e-86  | 24            |     |
| ISG20 GC IgA    |           |       |       |               |               |     |
| 2.100674e-89    | -2.054888 |       | 0.241 | 0.701         | 3.745292e-85  | 24  |
| EMP3 GC IgA     |           |       |       |               |               |     |
| 4.65705e-89     | 1.271127  | 0.78  | 0.231 | 8.303055e-85  | 24            |     |
| UBE2J1 GC IgA   |           |       |       |               |               |     |
| 6.392651e-87    | 1.206474  | 0.901 | 0.426 | 1.139746e-82  | 24            |     |
| IRF8 GC IgA     |           |       |       |               |               |     |
| 2.022018e-86    | 1.375738  | 0.684 | 0.199 | 3.605056e-82  | 24            |     |
| HMCES GC IgA    |           |       |       |               |               |     |

|                   |           |       |       |              |              |     |
|-------------------|-----------|-------|-------|--------------|--------------|-----|
| 3.582623e-86      | 1.293821  | 0.647 | 0.162 | 6.387459e-82 | 24           |     |
| DEF8 GC IgA       |           |       |       |              |              |     |
| 9.080858e-86      | 1.353571  | 0.842 | 0.3   | 1.619026e-81 | 24           |     |
| CD27 GC IgA       |           |       |       |              |              |     |
| 1.005931e-85      | 0.6982521 |       | 1     | 0.998        | 1.793475e-81 | 24  |
| TMSB4X GC IgA     |           |       |       |              |              |     |
| 5.876991e-84      | -2.255469 |       | 0.656 | 0.908        | 1.047809e-79 | 24  |
| IGHM GC IgA       |           |       |       |              |              |     |
| 1.695973e-83      | 0.9389434 |       | 0.991 | 0.799        | 3.02375e-79  | 24  |
| LAPTM5 GC IgA     |           |       |       |              |              |     |
| 2.508815e-81      | 1.215193  | 0.483 | 0.1   | 4.472966e-77 | 24           |     |
| SEMA4A GC IgA     |           |       |       |              |              |     |
| 2.736822e-80      | 1.261449  | 0.628 | 0.157 | 4.879479e-76 | 24           |     |
| SUSD3 GC IgA      |           |       |       |              |              |     |
| 1.122335e-79      | 1.425439  | 0.666 | 0.187 | 2.001011e-75 | 24           |     |
| DAAM1 GC IgA      |           |       |       |              |              |     |
| 6.846042e-78      | -2.050251 |       | 0.08  | 0.547        | 1.220581e-73 | 24  |
| CCR7 GC IgA       |           |       |       |              |              |     |
| 3.121102e-76      | 1.148706  | 0.752 | 0.271 | 5.564613e-72 | 24           |     |
| NCF1 GC IgA       |           |       |       |              |              |     |
| 7.376883e-76      | 1.21487   | 0.44  | 0.075 | 1.315224e-71 | 24           |     |
| LM02 GC IgA       |           |       |       |              |              |     |
| 8.457344e-75      | 0.8143049 |       | 0.997 | 0.899        | 1.50786e-70  | 24  |
| PFN1 GC IgA       |           |       |       |              |              |     |
| 1.246079e-74      | 1.032459  | 0.901 | 0.538 | 2.221634e-70 | 24           |     |
| PARP1 GC IgA      |           |       |       |              |              |     |
| 3.631602e-74      | 1.094182  | 0.789 | 0.3   | 6.474783e-70 | 24           |     |
| BCL7A GC IgA      |           |       |       |              |              |     |
| 1.675212e-72      | 1.22921   | 0.712 | 0.261 | 2.986736e-68 | 24           |     |
| CD22 GC IgA       |           |       |       |              |              |     |
| 8.235018e-70      | 1.1744    | 0.563 | 0.137 | 1.468221e-65 | 24           |     |
| SOCS1 GC IgA      |           |       |       |              |              |     |
| 2.453534e-69      | 1.05277   | 0.548 | 0.108 | 4.374406e-65 | 24           |     |
| AC023590.1 GC IgA |           |       |       |              |              |     |
| 5.443618e-69      | -1.07802  | 0.997 | 0.998 | 9.705426e-65 | 24           | B2M |
| GC IgA            |           |       |       |              |              |     |
| 2.545899e-68      | 1.07959   | 0.78  | 0.326 | 4.539083e-64 | 24           |     |
| RFTN1 GC IgA      |           |       |       |              |              |     |
| 1.062138e-67      | 1.151522  | 0.669 | 0.23  | 1.893685e-63 | 24           |     |
| ZNF581 GC IgA     |           |       |       |              |              |     |
| 2.424954e-67      | 1.082176  | 0.913 | 0.602 | 4.32345e-63  | 24           |     |
| DYNLL1 GC IgA     |           |       |       |              |              |     |
| 3.818796e-67      | 1.136933  | 0.591 | 0.165 | 6.808531e-63 | 24           |     |
| SEL1L3 GC IgA     |           |       |       |              |              |     |
| 2.008817e-66      | 1.100885  | 0.511 | 0.118 | 3.58152e-62  | 24           |     |
| VNN2 GC IgA       |           |       |       |              |              |     |
| 2.320734e-66      | 0.624138  | 0.91  | 0.4   | 4.137637e-62 | 24           |     |
| JCHAIN GC IgA     |           |       |       |              |              |     |
| 3.497788e-66      | 1.144869  | 0.793 | 0.337 | 6.236207e-62 | 24           |     |
| LRMP GC IgA       |           |       |       |              |              |     |



|              |                |       |              |              |     |
|--------------|----------------|-------|--------------|--------------|-----|
| 3.32525e-65  | -1.655675      | 0.703 | 0.906        | 5.928589e-61 | 24  |
| HLA-A        | GC IgA         |       |              |              |     |
| 3.328614e-65 | 0.9367205      | 0.92  | 0.62         | 5.934585e-61 | 24  |
| ARPC1B       | GC IgA         |       |              |              |     |
| 2.045467e-64 | 1.046006 0.576 | 0.15  | 3.646864e-60 | 24           |     |
| CD81         | GC IgA         |       |              |              |     |
| 8.069398e-64 | 1.061001 0.495 | 0.104 | 1.438693e-59 | 24           | HRK |
|              | GC IgA         |       |              |              |     |
| 3.684161e-63 | 1.055626 0.474 | 0.109 | 6.56849e-59  | 24           |     |
| CPNE5        | GC IgA         |       |              |              |     |
| 1.788082e-62 | 1.130625 0.567 | 0.177 | 3.187971e-58 | 24           | LCK |
|              | GC IgA         |       |              |              |     |
| 1.680782e-61 | 1.132519 0.458 | 0.092 | 2.996666e-57 | 24           |     |
| WDR66        | GC IgA         |       |              |              |     |
| 1.925672e-61 | 1.164756 0.579 | 0.145 | 3.433281e-57 | 24           | BIK |
|              | GC IgA         |       |              |              |     |
| 2.070599e-61 | -1.900163      | 0.195 | 0.573        | 3.691671e-57 | 24  |
| VIM          | GC IgA         |       |              |              |     |
| 5.040337e-61 | 1.00741 0.759  | 0.294 | 8.986417e-57 | 24           |     |
| GGA2         | GC IgA         |       |              |              |     |
| 3.522905e-60 | 1.080973 0.625 | 0.215 | 6.280987e-56 | 24           |     |
| NANS         | GC IgA         |       |              |              |     |
| 1.21119e-59  | 1.007242 0.752 | 0.328 | 2.159431e-55 | 24           |     |
| GRHPR        | GC IgA         |       |              |              |     |
| 2.327397e-59 | 1.016722 0.402 | 0.07  | 4.149517e-55 | 24           |     |
| S1PR2        | GC IgA         |       |              |              |     |
| 4.435043e-59 | 0.581134 0.994 | 0.961 | 7.907238e-55 | 24           |     |
| OAZ1         | GC IgA         |       |              |              |     |
| 1.136228e-57 | -1.812768      | 0.217 | 0.609        | 2.025781e-53 | 24  |
| IGHD         | GC IgA         |       |              |              |     |
| 1.885858e-57 | 0.6604298      | 0.985 | 0.869        | 3.362296e-53 | 24  |
| ARPC3        | GC IgA         |       |              |              |     |
| 4.643094e-57 | 0.9700701      | 0.616 | 0.204        | 8.278172e-53 | 24  |
| EAF2         | GC IgA         |       |              |              |     |
| 1.87026e-56  | 0.9668097      | 0.557 | 0.166        | 3.334486e-52 | 24  |
| CCDC88A      | GC IgA         |       |              |              |     |
| 9.363528e-56 | 1.00018 0.675  | 0.258 | 1.669423e-51 | 24           |     |
| CCDC69       | GC IgA         |       |              |              |     |
| 2.545714e-55 | 1.004103 0.548 | 0.137 | 4.538753e-51 | 24           |     |
| AIM2         | GC IgA         |       |              |              |     |
| 5.364629e-55 | 0.8363566      | 0.334 | 0.054        | 9.564596e-51 | 24  |
| BFSP2        | GC IgA         |       |              |              |     |
| 6.477314e-55 | 1.035208 0.663 | 0.234 | 1.15484e-50  | 24           |     |
| GCHFR        | GC IgA         |       |              |              |     |
| 1.047807e-53 | 1.038806 0.477 | 0.136 | 1.868135e-49 | 24           |     |
| SIT1         | GC IgA         |       |              |              |     |
| 1.328539e-53 | 1.010488 0.824 | 0.49  | 2.368652e-49 | 24           |     |
| C4orf3       | GC IgA         |       |              |              |     |
| 1.802425e-53 | 0.9595303      | 0.768 | 0.381        | 3.213544e-49 | 24  |
| SMARCB1      | GC IgA         |       |              |              |     |

|              |                |       |              |              |    |
|--------------|----------------|-------|--------------|--------------|----|
| 2.343924e-53 | 0.6605757      | 0.991 | 0.918        | 4.178982e-49 | 24 |
| CFL1         | GC IgA         |       |              |              |    |
| 4.770289e-53 | 0.9617785      | 0.461 | 0.114        | 8.504948e-49 | 24 |
| ABI3         | GC IgA         |       |              |              |    |
| 1.06856e-52  | 0.7290981      | 0.291 | 0.041        | 1.905135e-48 | 24 |
| ACY3         | GC IgA         |       |              |              |    |
| 2.04924e-52  | 0.9299754      | 0.759 | 0.336        | 3.653589e-48 | 24 |
| STK17A       | GC IgA         |       |              |              |    |
| 2.954919e-52 | 1.001825 0.427 | 0.095 | 5.268325e-48 | 24           |    |
| STAG3        | GC IgA         |       |              |              |    |
| 3.239537e-52 | 0.9397989      | 0.492 | 0.116        | 5.775771e-48 | 24 |
| CD38         | GC IgA         |       |              |              |    |
| 6.344148e-52 | 0.9653045      | 0.746 | 0.358        | 1.131098e-47 | 24 |
| TPD52        | GC IgA         |       |              |              |    |
| 6.774661e-51 | 0.7732107      | 0.941 | 0.651        | 1.207854e-46 | 24 |
| YWHAB        | GC IgA         |       |              |              |    |
| 9.463612e-51 | 0.9349446      | 0.536 | 0.18         | 1.687267e-46 | 24 |
| RASGRP3      | GC IgA         |       |              |              |    |
| 1.453122e-50 | 0.9545238      | 0.489 | 0.144        | 2.590772e-46 | 24 |
| SEC14L1      | GC IgA         |       |              |              |    |
| 8.520291e-50 | 0.9525089      | 0.684 | 0.271        | 1.519083e-45 | 24 |
| POU2AF1      | GC IgA         |       |              |              |    |
| 1.288522e-49 | 0.8906065      | 0.848 | 0.532        | 2.297306e-45 | 24 |
| SRSF9        | GC IgA         |       |              |              |    |
| 2.880207e-49 | 0.9414181      | 0.824 | 0.435        | 5.135122e-45 | 24 |
| COTL1        | GC IgA         |       |              |              |    |
| 3.154115e-49 | 0.8175512      | 0.907 | 0.618        | 5.623471e-45 | 24 |
| ACTR3        | GC IgA         |       |              |              |    |
| 2.801361e-48 | 0.8551067      | 0.876 | 0.554        | 4.994546e-44 | 24 |
| ATP5IF1      | GC IgA         |       |              |              |    |
| 1.326191e-47 | 0.8571542      | 0.641 | 0.23         | 2.364465e-43 | 24 |
| IL4R         | GC IgA         |       |              |              |    |
| 3.075776e-47 | 0.9130681      | 0.412 | 0.106        | 5.4838e-43   | 24 |
| OGG1         | GC IgA         |       |              |              |    |
| 3.749711e-47 | -0.8152629     | 0.994 | 0.996        | 6.68536e-43  | 24 |
| RPS12        | GC IgA         |       |              |              |    |
| 1.194812e-46 | 0.8818959      | 0.545 | 0.185        | 2.13023e-42  | 24 |
| PRPSAP2      | GC IgA         |       |              |              |    |
| 3.715964e-46 | 0.7027088      | 0.276 | 0.038        | 6.625191e-42 | 24 |
| SYBU         | GC IgA         |       |              |              |    |
| 1.824963e-45 | 0.6424893      | 0.978 | 0.901        | 3.253727e-41 | 24 |
| MYL6         | GC IgA         |       |              |              |    |
| 2.984183e-45 | -0.9857209     | 0.969 | 0.986        | 5.3205e-41   | 24 |
| HLA-B        | GC IgA         |       |              |              |    |
| 1.03749e-44  | 0.7169783      | 0.932 | 0.655        | 1.849742e-40 | 24 |
| SLC25A5      | GC IgA         |       |              |              |    |
| 1.709436e-44 | 0.8589613      | 0.638 | 0.247        | 3.047754e-40 | 24 |
| SH3KBP1      | GC IgA         |       |              |              |    |
| 8.228627e-44 | 0.9292065      | 0.619 | 0.256        | 1.467082e-39 | 24 |
| SYNE2        | GC IgA         |       |              |              |    |

|              |            |       |       |              |    |
|--------------|------------|-------|-------|--------------|----|
| 1.030361e-43 | 0.8783542  | 0.48  | 0.155 | 1.837031e-39 | 24 |
| SMIM20       | GC IgA     |       |       |              |    |
| 1.639011e-43 | -0.6524226 | 0.994 | 0.999 | 2.922193e-39 | 24 |
| RPS29        | GC IgA     |       |       |              |    |
| 2.143605e-43 | 0.8999004  | 0.734 | 0.372 | 3.821834e-39 | 24 |
| LCP1         | GC IgA     |       |       |              |    |
| 5.052812e-43 | 0.8751499  | 0.409 | 0.122 | 9.008659e-39 | 24 |
| DLAT         | GC IgA     |       |       |              |    |
| 7.48856e-43  | 0.6676098  | 0.954 | 0.761 | 1.335135e-38 | 24 |
| CYBA         | GC IgA     |       |       |              |    |
| 1.040977e-42 | 0.6498816  | 0.932 | 0.677 | 1.855958e-38 | 24 |
| HLA-DMA      | GC IgA     |       |       |              |    |
| 2.15055e-42  | 0.9353569  | 0.508 | 0.158 | 3.834216e-38 | 24 |
| C12orf75     | GC IgA     |       |       |              |    |
| 2.256734e-42 | 0.6380097  | 0.245 | 0.038 | 4.02353e-38  | 24 |
| EEPD1        | GC IgA     |       |       |              |    |
| 6.117768e-42 | 0.9858765  | 0.619 | 0.238 | 1.090737e-37 | 24 |
| RGS1         | GC IgA     |       |       |              |    |
| 7.502641e-42 | 0.7949243  | 0.337 | 0.077 | 1.337646e-37 | 24 |
| MY01E        | GC IgA     |       |       |              |    |
| 7.844125e-42 | 0.7562028  | 0.344 | 0.069 | 1.398529e-37 | 24 |
| RPRD1B       | GC IgA     |       |       |              |    |
| 8.480989e-42 | -1.737201  | 0.183 | 0.467 | 1.512076e-37 | 24 |
| S100A6       | GC IgA     |       |       |              |    |
| 8.910127e-42 | 0.7337271  | 0.91  | 0.622 | 1.588586e-37 | 24 |
| LAMTOR5      | GC IgA     |       |       |              |    |
| 9.580402e-42 | 0.8007113  | 0.752 | 0.372 | 1.70809e-37  | 24 |
| PTP4A2       | GC IgA     |       |       |              |    |
| 1.632177e-41 | 0.851189   | 0.737 | 0.404 | 2.910008e-37 | 24 |
| LSM10        | GC IgA     |       |       |              |    |
| 6.110171e-41 | 0.7146498  | 0.331 | 0.067 | 1.089382e-36 | 24 |
| SNTA1        | GC IgA     |       |       |              |    |
| 1.794073e-40 | 0.8134503  | 0.759 | 0.412 | 3.198653e-36 | 24 |
| HDAC1        | GC IgA     |       |       |              |    |
| 1.949283e-40 | 0.6937678  | 0.291 | 0.064 | 3.475376e-36 | 24 |
| QPCT         | GC IgA     |       |       |              |    |
| 2.402418e-40 | 0.9009946  | 0.604 | 0.234 | 4.283271e-36 | 24 |
| CCND3        | GC IgA     |       |       |              |    |
| 5.505252e-40 | -1.232441  | 0.093 | 0.385 | 9.815314e-36 | 24 |
| CD44         | GC IgA     |       |       |              |    |
| 8.899472e-40 | 0.8422224  | 0.628 | 0.28  | 1.586687e-35 | 24 |
| LAT2         | GC IgA     |       |       |              |    |
| 1.058777e-38 | 0.7932425  | 0.789 | 0.457 | 1.887693e-34 | 24 |
| RAP1B        | GC IgA     |       |       |              |    |
| 1.490395e-38 | 0.6815705  | 0.892 | 0.577 | 2.657225e-34 | 24 |
| LDHB         | GC IgA     |       |       |              |    |
| 4.845778e-38 | 0.6177318  | 0.207 | 0.026 | 8.639538e-34 | 24 |
| HTR3A        | GC IgA     |       |       |              |    |
| 4.981165e-38 | 0.6244478  | 0.272 | 0.053 | 8.88092e-34  | 24 |
| BORCS8-MEF2B | GC IgA     |       |       |              |    |

|              |            |       |       |              |    |
|--------------|------------|-------|-------|--------------|----|
| 7.382608e-38 | 0.5457131  | 0.981 | 0.865 | 1.316245e-33 | 24 |
| CD79A        | GC IgA     |       |       |              |    |
| 7.469423e-38 | -1.237477  | 0.077 | 0.353 | 1.331723e-33 | 24 |
| LY6E         | GC IgA     |       |       |              |    |
| 8.49571e-38  | 0.7812241  | 0.322 | 0.08  | 1.5147e-33   | 24 |
| GPR160       | GC IgA     |       |       |              |    |
| 1.118388e-37 | 0.7816576  | 0.44  | 0.132 | 1.993974e-33 | 24 |
| MAP4K1       | GC IgA     |       |       |              |    |
| 1.807086e-37 | 0.7663108  | 0.52  | 0.183 | 3.221853e-33 | 24 |
| P2RX5        | GC IgA     |       |       |              |    |
| 2.586014e-37 | -1.268898  | 0.303 | 0.578 | 4.610605e-33 | 24 |
| SARAF        | GC IgA     |       |       |              |    |
| 3.812403e-37 | 0.7862164  | 0.372 | 0.082 | 6.797133e-33 | 24 |
| AICDA        | GC IgA     |       |       |              |    |
| 8.954006e-37 | 0.8570724  | 0.625 | 0.305 | 1.59641e-32  | 24 |
| FERMT3       | GC IgA     |       |       |              |    |
| 9.355224e-37 | 0.8374843  | 0.545 | 0.19  | 1.667943e-32 | 24 |
| DNMT1        | GC IgA     |       |       |              |    |
| 9.727923e-37 | 0.5832915  | 0.211 | 0.032 | 1.734391e-32 | 24 |
| RAPGEF5      | GC IgA     |       |       |              |    |
| 1.154767e-36 | 0.8159753  | 0.474 | 0.16  | 2.058834e-32 | 24 |
| LYPLAL1      | GC IgA     |       |       |              |    |
| 2.21924e-36  | 0.8610865  | 0.362 | 0.114 | 3.956683e-32 | 24 |
| GMD5         | GC IgA     |       |       |              |    |
| 4.168502e-36 | 0.525622   | 0.988 | 0.937 | 7.432022e-32 | 24 |
| EEF2         | GC IgA     |       |       |              |    |
| 7.433864e-36 | 0.6605037  | 0.241 | 0.045 | 1.325384e-31 | 24 |
| CCDC144A     | GC IgA     |       |       |              |    |
| 1.726016e-35 | -0.8802045 | 0.935 | 0.961 | 3.077314e-31 | 24 |
| MT-ND2       | GC IgA     |       |       |              |    |
| 3.696664e-35 | 0.6355138  | 0.26  | 0.052 | 6.590782e-31 | 24 |
| A4GALT       | GC IgA     |       |       |              |    |
| 3.782016e-35 | 0.5706441  | 0.238 | 0.043 | 6.742956e-31 | 24 |
| ASB2         | GC IgA     |       |       |              |    |
| 7.710904e-35 | 0.6380708  | 0.201 | 0.027 | 1.374777e-30 | 24 |
| CAMK1        | GC IgA     |       |       |              |    |
| 1.447328e-34 | 0.7194701  | 0.307 | 0.071 | 2.580441e-30 | 24 |
| CDCA7        | GC IgA     |       |       |              |    |
| 1.587629e-34 | 0.6894833  | 0.814 | 0.514 | 2.830584e-30 | 24 |
| SMDT1        | GC IgA     |       |       |              |    |
| 2.603179e-34 | 0.7036461  | 0.31  | 0.076 | 4.641208e-30 | 24 |
| KLHL6        | GC IgA     |       |       |              |    |
| 3.419016e-34 | 0.7607968  | 0.69  | 0.363 | 6.095764e-30 | 24 |
| SNAP23       | GC IgA     |       |       |              |    |
| 5.338381e-34 | 0.7173609  | 0.762 | 0.437 | 9.517799e-30 | 24 |
| RHOH         | GC IgA     |       |       |              |    |
| 6.026783e-34 | -0.4664057 | 1     | 1     | 1.074515e-29 | 24 |
| RPL41        | GC IgA     |       |       |              |    |
| 8.124148e-34 | 0.7006607  | 0.752 | 0.417 | 1.448454e-29 | 24 |
| FAM49B       | GC IgA     |       |       |              |    |

|              |                |       |              |              |    |
|--------------|----------------|-------|--------------|--------------|----|
| 1.463599e-33 | 0.7297591      | 0.774 | 0.437        | 2.60945e-29  | 24 |
| HMGA1        | GC IgA         |       |              |              |    |
| 1.971331e-33 | 0.7046835      | 0.743 | 0.4          | 3.514685e-29 | 24 |
| MBD4         | GC IgA         |       |              |              |    |
| 2.007043e-33 | 0.7320256      | 0.517 | 0.193        | 3.578356e-29 | 24 |
| USP34        | GC IgA         |       |              |              |    |
| 4.609471e-33 | -1.183571      | 0.238 | 0.496        | 8.218225e-29 | 24 |
| FXVD5        | GC IgA         |       |              |              |    |
| 6.948298e-33 | 0.765192 0.567 | 0.237 | 1.238812e-28 | 24           |    |
| NCF4         | GC IgA         |       |              |              |    |
| 7.289141e-33 | 0.8142998      | 0.337 | 0.101        | 1.299581e-28 | 24 |
| ALDH2        | GC IgA         |       |              |              |    |
| 8.760634e-33 | 0.6925355      | 0.548 | 0.224        | 1.561933e-28 | 24 |
| UBE2G1       | GC IgA         |       |              |              |    |
| 2.244496e-32 | 0.854463 0.508 | 0.184 | 4.001712e-28 | 24           |    |
| RGS2         | GC IgA         |       |              |              |    |
| 2.395824e-32 | 0.694439 0.56  | 0.217 | 4.271515e-28 | 24           |    |
| LY86         | GC IgA         |       |              |              |    |
| 3.023056e-32 | 0.5502459      | 0.207 | 0.038        | 5.389807e-28 | 24 |
| TOX          | GC IgA         |       |              |              |    |
| 3.088475e-32 | 0.6695473      | 0.743 | 0.414        | 5.506442e-28 | 24 |
| PPP1CC       | GC IgA         |       |              |              |    |
| 5.024873e-32 | 0.7275508      | 0.591 | 0.24         | 8.958846e-28 | 24 |
| SLBP         | GC IgA         |       |              |              |    |
| 6.140875e-32 | -0.7962466     | 0.932 | 0.969        | 1.094857e-27 | 24 |
| MT-ND3       | GC IgA         |       |              |              |    |
| 8.547001e-32 | 0.7255048      | 0.724 | 0.391        | 1.523845e-27 | 24 |
| SYPL1        | GC IgA         |       |              |              |    |
| 3.059521e-31 | -1.506949      | 0.096 | 0.374        | 5.454821e-27 | 24 |
| SELL         | GC IgA         |       |              |              |    |
| 3.795349e-31 | 0.5922763      | 0.229 | 0.049        | 6.766728e-27 | 24 |
| UCHL1        | GC IgA         |       |              |              |    |
| 4.024259e-31 | 0.5687593      | 0.251 | 0.05         | 7.174851e-27 | 24 |
| ASB13        | GC IgA         |       |              |              |    |
| 4.125418e-31 | 0.5448429      | 0.263 | 0.062        | 7.355207e-27 | 24 |
| PITPNC1      | GC IgA         |       |              |              |    |
| 1.810792e-30 | 0.6687801      | 0.337 | 0.106        | 3.22846e-26  | 24 |
| E2F5         | GC IgA         |       |              |              |    |
| 2.139417e-30 | 0.4682924      | 0.954 | 0.775        | 3.814367e-26 | 24 |
| ARHGDI1B     | GC IgA         |       |              |              |    |
| 2.630445e-30 | 0.7439988      | 0.554 | 0.256        | 4.689821e-26 | 24 |
| CDV3         | GC IgA         |       |              |              |    |
| 3.051306e-30 | -1.108612      | 0.393 | 0.622        | 5.440173e-26 | 24 |
| SUB1         | GC IgA         |       |              |              |    |
| 3.175596e-30 | 0.6780496      | 0.796 | 0.487        | 5.661769e-26 | 24 |
| UCP2         | GC IgA         |       |              |              |    |
| 4.661816e-30 | 0.4857987      | 0.994 | 0.946        | 8.311552e-26 | 24 |
| HLA-DRA      | GC IgA         |       |              |              |    |
| 5.016768e-30 | -0.9086865     | 0.969 | 0.986        | 8.944395e-26 | 24 |
| TMSB10       | GC IgA         |       |              |              |    |

|              |                |       |              |              |    |
|--------------|----------------|-------|--------------|--------------|----|
| 6.115301e-30 | 0.6989473      | 0.523 | 0.195        | 1.090297e-25 | 24 |
| POLD4        | GC IgA         |       |              |              |    |
| 7.030065e-30 | -1.197361      | 0.111 | 0.354        | 1.25339e-25  | 24 |
| TXNIP        | GC IgA         |       |              |              |    |
| 7.568996e-30 | 0.6255859      | 0.245 | 0.06         | 1.349476e-25 | 24 |
| DCAF12       | GC IgA         |       |              |              |    |
| 8.297794e-30 | 0.6640557      | 0.678 | 0.352        | 1.479414e-25 | 24 |
| CD19         | GC IgA         |       |              |              |    |
| 1.068403e-29 | 0.6528975      | 0.616 | 0.286        | 1.904856e-25 | 24 |
| RRAS2        | GC IgA         |       |              |              |    |
| 1.343622e-29 | 0.678503 0.437 | 0.16  | 2.395543e-25 | 24           |    |
| UBE2R2       | GC IgA         |       |              |              |    |
| 1.842107e-29 | 0.714303 0.322 | 0.094 | 3.284293e-25 | 24           |    |
| FAM76B       | GC IgA         |       |              |              |    |
| 2.188016e-29 | 0.6405147      | 0.672 | 0.351        | 3.901014e-25 | 24 |
| DBNL         | GC IgA         |       |              |              |    |
| 2.426553e-29 | 0.6373447      | 0.291 | 0.073        | 4.326302e-25 | 24 |
| PAG1         | GC IgA         |       |              |              |    |
| 2.933235e-29 | 0.6950172      | 0.721 | 0.416        | 5.229665e-25 | 24 |
| CTSH         | GC IgA         |       |              |              |    |
| 5.31315e-29  | 0.6837927      | 0.768 | 0.458        | 9.472814e-25 | 24 |
| SWAP70       | GC IgA         |       |              |              |    |
| 6.464015e-29 | 0.6559927      | 0.678 | 0.363        | 1.152469e-24 | 24 |
| TERF2IP      | GC IgA         |       |              |              |    |
| 1.024036e-28 | 0.7318036      | 0.554 | 0.24         | 1.825754e-24 | 24 |
| NCOA3        | GC IgA         |       |              |              |    |
| 1.522911e-28 | 0.6943534      | 0.347 | 0.122        | 2.715198e-24 | 24 |
| SPATS2       | GC IgA         |       |              |              |    |
| 2.497483e-28 | 0.4209021      | 0.167 | 0.02         | 4.452762e-24 | 24 |
| LOXL2        | GC IgA         |       |              |              |    |
| 2.748285e-28 | 0.7293754      | 0.35  | 0.116        | 4.899917e-24 | 24 |
| BRWD1        | GC IgA         |       |              |              |    |
| 2.893471e-28 | 0.6100961      | 0.399 | 0.126        | 5.158769e-24 | 24 |
| RABGAP1L     | GC IgA         |       |              |              |    |
| 3.845593e-28 | -0.5926049     | 0.991 | 0.991        | 6.856308e-24 | 24 |
| RPL9         | GC IgA         |       |              |              |    |
| 4.135131e-28 | -0.9720806     | 0.065 | 0.28         | 7.372524e-24 | 24 |
| IFITM2       | GC IgA         |       |              |              |    |
| 6.751618e-28 | -0.9497788     | 0.031 | 0.221        | 1.203746e-23 | 24 |
| GBP2         | GC IgA         |       |              |              |    |
| 1.238328e-27 | 0.4843825      | 0.18  | 0.03         | 2.207815e-23 | 24 |
| MIR3681HG    | GC IgA         |       |              |              |    |
| 1.555754e-27 | 0.760842 0.554 | 0.263 | 2.773755e-23 | 24           |    |
| RBM6         | GC IgA         |       |              |              |    |
| 1.651603e-27 | 0.6746375      | 0.365 | 0.126        | 2.944643e-23 | 24 |
| MSI2         | GC IgA         |       |              |              |    |
| 1.862228e-27 | 0.5312852      | 0.245 | 0.055        | 3.320167e-23 | 24 |
| MME          | GC IgA         |       |              |              |    |
| 2.027293e-27 | 0.7185698      | 0.635 | 0.334        | 3.61446e-23  | 24 |
| SEPHS2       | GC IgA         |       |              |              |    |

|              |                |       |       |              |    |
|--------------|----------------|-------|-------|--------------|----|
| 2.05422e-27  | -0.505388      | 0.988 | 0.995 | 3.662469e-23 | 24 |
| RPS25        | GC IgA         |       |       |              |    |
| 2.094933e-27 | 0.6041343      | 0.811 | 0.513 | 3.735056e-23 | 24 |
| LSP1         | GC IgA         |       |       |              |    |
| 2.799843e-27 | 0.5713469      | 0.279 | 0.069 | 4.99184e-23  | 24 |
| TERF2        | GC IgA         |       |       |              |    |
| 2.868581e-27 | 0.5534875      | 0.882 | 0.606 | 5.114394e-23 | 24 |
| POMP         | GC IgA         |       |       |              |    |
| 2.87484e-27  | 0.596378 0.3   | 0.081 |       | 5.125552e-23 | 24 |
| BPNT1        | GC IgA         |       |       |              |    |
| 8.21844e-27  | 0.6311968      | 0.7   | 0.39  | 1.465266e-22 | 24 |
| FNBP1        | GC IgA         |       |       |              |    |
| 8.779439e-27 | 0.4361409      | 0.988 | 0.939 | 1.565286e-22 | 24 |
| H3F3A        | GC IgA         |       |       |              |    |
| 1.197705e-26 | -0.4676681     | 1     | 0.998 | 2.135389e-22 | 24 |
| RPLP2        | GC IgA         |       |       |              |    |
| 1.501405e-26 | 0.6029854      | 0.793 | 0.521 | 2.676855e-22 | 24 |
| FKBP1A       | GC IgA         |       |       |              |    |
| 1.559528e-26 | 0.6979504      | 0.347 | 0.097 | 2.780482e-22 | 24 |
| MX1          | GC IgA         |       |       |              |    |
| 1.636466e-26 | 0.5435907      | 0.851 | 0.582 | 2.917656e-22 | 24 |
| ATP5MC3      | GC IgA         |       |       |              |    |
| 2.034206e-26 | 0.5896664      | 0.755 | 0.451 | 3.626786e-22 | 24 |
| PTPRC        | GC IgA         |       |       |              |    |
| 2.075793e-26 | 0.4632132      | 0.142 | 0.02  | 3.700931e-22 | 24 |
| NLRP4        | GC IgA         |       |       |              |    |
| 2.810828e-26 | 0.6424856      | 0.393 | 0.144 | 5.011425e-22 | 24 |
| P2RY8        | GC IgA         |       |       |              |    |
| 2.885357e-26 | 0.563205 0.811 | 0.521 |       | 5.144302e-22 | 24 |
| TRAPPC1      | GC IgA         |       |       |              |    |
| 3.3787e-26   | 0.6799872      | 0.368 | 0.102 | 6.023885e-22 | 24 |
| RMI2         | GC IgA         |       |       |              |    |
| 3.662039e-26 | -1.640992      | 0.099 | 0.288 | 6.52905e-22  | 24 |
| MIR155HG     | GC IgA         |       |       |              |    |
| 5.21114e-26  | 0.6602399      | 0.437 | 0.176 | 9.290941e-22 | 24 |
| PLIN3        | GC IgA         |       |       |              |    |
| 7.954308e-26 | 0.6595213      | 0.502 | 0.222 | 1.418174e-21 | 24 |
| SIAH2        | GC IgA         |       |       |              |    |
| 1.127386e-25 | 0.668167 0.604 | 0.326 |       | 2.010016e-21 | 24 |
| GYPC         | GC IgA         |       |       |              |    |
| 1.228751e-25 | 0.5874264      | 0.313 | 0.093 | 2.190741e-21 | 24 |
| PXMP2        | GC IgA         |       |       |              |    |
| 1.372934e-25 | 0.5770409      | 0.325 | 0.099 | 2.447803e-21 | 24 |
| MYBL2        | GC IgA         |       |       |              |    |
| 1.449314e-25 | 0.5328039      | 0.251 | 0.061 | 2.583982e-21 | 24 |
| FANCA        | GC IgA         |       |       |              |    |
| 1.572859e-25 | 0.6251438      | 0.554 | 0.247 | 2.80425e-21  | 24 |
| PPP2R5C      | GC IgA         |       |       |              |    |
| 1.695034e-25 | 0.6549472      | 0.582 | 0.304 | 3.022077e-21 | 24 |
| TIMM8B       | GC IgA         |       |       |              |    |

|              |            |       |       |              |        |
|--------------|------------|-------|-------|--------------|--------|
| 1.707011e-25 | 0.6129811  | 0.65  | 0.337 | 3.043431e-21 | 24     |
| RBBP4        | GC IgA     |       |       |              |        |
| 2.064942e-25 | 0.6103451  | 0.7   | 0.391 | 3.681585e-21 | 24     |
| YWHAE        | GC IgA     |       |       |              |        |
| 2.218389e-25 | -0.4651048 | 0.997 | 0.999 | 3.955167e-21 | 24     |
| RPL13        | GC IgA     |       |       |              |        |
| 2.473069e-25 | -1.024506  | 0.217 | 0.428 | 4.409235e-21 | 24     |
| PLP2         | GC IgA     |       |       |              |        |
| 2.8425e-25   | 0.6634517  | 0.563 | 0.276 | 5.067894e-21 | 24     |
| STK17B       | GC IgA     |       |       |              |        |
| 2.96165e-25  | 0.6358634  | 0.396 | 0.145 | 5.280325e-21 | 24     |
| ANKRD13A     | GC IgA     |       |       |              |        |
| 3.501065e-25 | 0.6078875  | 0.412 | 0.147 | 6.242049e-21 | 24     |
| PTPN18       | GC IgA     |       |       |              |        |
| 3.870908e-25 | 0.636989   | 0.576 | 0.265 | 6.901442e-21 | 24     |
| ALOX5AP      | GC IgA     |       |       |              |        |
| 5.344579e-25 | 0.69249    | 0.508 | 0.231 | 9.528849e-21 | 24     |
| CHCHD10      | GC IgA     |       |       |              |        |
| 5.371073e-25 | 0.5459645  | 0.811 | 0.521 | 9.576087e-21 | 24     |
| SELENOT      | GC IgA     |       |       |              |        |
| 6.011902e-25 | 0.5954666  | 0.337 | 0.108 | 1.071862e-20 | 24     |
| ITGB2        | GC IgA     |       |       |              |        |
| 6.431687e-25 | 0.4866237  | 0.916 | 0.699 | 1.146706e-20 | 24     |
| ELOB         | GC IgA     |       |       |              |        |
| 8.509731e-25 | 0.616523   | 0.533 | 0.245 | 1.5172e-20   | 24 CSK |
| GC IgA       |            |       |       |              |        |
| 9.627365e-25 | 0.5735324  | 0.842 | 0.582 | 1.716463e-20 | 24     |
| ANP32B       | GC IgA     |       |       |              |        |
| 1.054447e-24 | -1.375154  | 0.511 | 0.667 | 1.879973e-20 | 24     |
| TUBA1B       | GC IgA     |       |       |              |        |
| 1.088635e-24 | 0.3799507  | 0.13  | 0.015 | 1.940928e-20 | 24     |
| AC104170.1   | GC IgA     |       |       |              |        |
| 1.107951e-24 | 0.4282816  | 0.167 | 0.033 | 1.975366e-20 | 24     |
| PDGFD        | GC IgA     |       |       |              |        |
| 1.978689e-24 | 0.4776885  | 0.214 | 0.044 | 3.527805e-20 | 24     |
| MYBL1        | GC IgA     |       |       |              |        |
| 2.026778e-24 | 0.488703   | 0.916 | 0.685 | 3.613543e-20 | 24     |
| PPP1CA       | GC IgA     |       |       |              |        |
| 2.729514e-24 | 0.5753521  | 0.269 | 0.066 | 4.86645e-20  | 24     |
| MFHAS1       | GC IgA     |       |       |              |        |
| 3.05099e-24  | 0.5005483  | 0.91  | 0.683 | 5.43961e-20  | 24     |
| COX6A1       | GC IgA     |       |       |              |        |
| 3.11754e-24  | 0.6170653  | 0.545 | 0.26  | 5.558263e-20 | 24     |
| ATXN10       | GC IgA     |       |       |              |        |
| 3.204346e-24 | -0.7294988 | 0.867 | 0.917 | 5.713029e-20 | 24     |
| EEF1B2       | GC IgA     |       |       |              |        |
| 4.165161e-24 | 0.4258553  | 0.155 | 0.029 | 7.426065e-20 | 24     |
| SCARB1       | GC IgA     |       |       |              |        |
| 4.272641e-24 | 0.5365068  | 0.759 | 0.446 | 7.617691e-20 | 24     |
| SEM1         | GC IgA     |       |       |              |        |



|              |            |       |       |              |    |
|--------------|------------|-------|-------|--------------|----|
| 4.848192e-24 | 0.4175259  | 0.167 | 0.028 | 8.643841e-20 | 24 |
| LINC00877    | GC IgA     |       |       |              |    |
| 5.046607e-24 | 0.5164063  | 0.879 | 0.633 | 8.997595e-20 | 24 |
| BRK1         | GC IgA     |       |       |              |    |
| 5.923981e-24 | 0.5186857  | 0.195 | 0.057 | 1.056187e-19 | 24 |
| RGS16        | GC IgA     |       |       |              |    |
| 7.104075e-24 | 0.5490043  | 0.536 | 0.188 | 1.266585e-19 | 24 |
| PTTG1        | GC IgA     |       |       |              |    |
| 7.127735e-24 | -1.038561  | 0.08  | 0.27  | 1.270804e-19 | 24 |
| GPR183       | GC IgA     |       |       |              |    |
| 7.134892e-24 | 0.3531549  | 0.149 | 0.02  | 1.27208e-19  | 24 |
| SPRED2       | GC IgA     |       |       |              |    |
| 7.158198e-24 | 0.5676879  | 0.368 | 0.14  | 1.276235e-19 | 24 |
| CUL3         | GC IgA     |       |       |              |    |
| 8.069498e-24 | 0.3983391  | 0.142 | 0.019 | 1.438711e-19 | 24 |
| CAMK2B       | GC IgA     |       |       |              |    |
| 1.091445e-23 | 0.3956948  | 0.152 | 0.029 | 1.945937e-19 | 24 |
| FGD6         | GC IgA     |       |       |              |    |
| 1.108501e-23 | 0.6286628  | 0.43  | 0.17  | 1.976347e-19 | 24 |
| BL0C1S6      | GC IgA     |       |       |              |    |
| 1.141501e-23 | 0.6674631  | 0.347 | 0.103 | 2.035182e-19 | 24 |
| SCIMP        | GC IgA     |       |       |              |    |
| 1.316992e-23 | -0.6629146 | 1     | 1     | 2.348065e-19 | 24 |
| MALAT1       | GC IgA     |       |       |              |    |
| 1.430912e-23 | 0.5091413  | 0.232 | 0.053 | 2.551172e-19 | 24 |
| BCL6         | GC IgA     |       |       |              |    |
| 1.458496e-23 | -0.3659172 | 1     | 0.999 | 2.600353e-19 | 24 |
| RPLP1        | GC IgA     |       |       |              |    |
| 1.685731e-23 | 0.5980662  | 0.653 | 0.358 | 3.00549e-19  | 24 |
| TKT          | GC IgA     |       |       |              |    |
| 1.703054e-23 | 0.4557533  | 0.189 | 0.037 | 3.036375e-19 | 24 |
| SLC2A5       | GC IgA     |       |       |              |    |
| 1.866832e-23 | 0.6619505  | 0.824 | 0.635 | 3.328375e-19 | 24 |
| CD53         | GC IgA     |       |       |              |    |
| 2.154455e-23 | 0.5514098  | 0.867 | 0.674 | 3.841177e-19 | 24 |
| ATP6V1G1     | GC IgA     |       |       |              |    |
| 2.258115e-23 | -0.4813415 | 1     | 0.999 | 4.025994e-19 | 24 |
| RPL34        | GC IgA     |       |       |              |    |
| 2.267951e-23 | 0.5945127  | 0.718 | 0.454 | 4.04353e-19  | 24 |
| CAPZA1       | GC IgA     |       |       |              |    |
| 4.517377e-23 | 0.5411496  | 0.461 | 0.185 | 8.054032e-19 | 24 |
| HLA-D0B      | GC IgA     |       |       |              |    |
| 5.555644e-23 | 0.4343279  | 0.164 | 0.031 | 9.905157e-19 | 24 |
| SMC04        | GC IgA     |       |       |              |    |
| 6.462075e-23 | 0.4562813  | 0.211 | 0.04  | 1.152123e-18 | 24 |
| SLC30A4      | GC IgA     |       |       |              |    |
| 7.298843e-23 | 0.5659398  | 0.43  | 0.176 | 1.301311e-18 | 24 |
| TRAPPC6A     | GC IgA     |       |       |              |    |
| 8.006511e-23 | 0.5911471  | 0.319 | 0.109 | 1.427481e-18 | 24 |
| MOB3A        | GC IgA     |       |       |              |    |

|              |            |       |       |              |    |
|--------------|------------|-------|-------|--------------|----|
| 9.626832e-23 | 0.5992961  | 0.381 | 0.145 | 1.716368e-18 | 24 |
| SH2B2        | GC IgA     |       |       |              |    |
| 9.875934e-23 | -0.9620328 | 0.272 | 0.464 | 1.76078e-18  | 24 |
| CD63         | GC IgA     |       |       |              |    |
| 1.108174e-22 | 0.5933726  | 0.672 | 0.41  | 1.975764e-18 | 24 |
| MOB1A        | GC IgA     |       |       |              |    |
| 1.208594e-22 | -0.464517  | 0.991 | 0.996 | 2.154803e-18 | 24 |
| RPL35A       | GC IgA     |       |       |              |    |
| 1.533844e-22 | 0.4422796  | 0.981 | 0.905 | 2.734691e-18 | 24 |
| ATP5F1E      | GC IgA     |       |       |              |    |
| 1.541776e-22 | 0.5739832  | 0.616 | 0.328 | 2.748832e-18 | 24 |
| CCM2         | GC IgA     |       |       |              |    |
| 2.884404e-22 | -0.586485  | 0.994 | 0.983 | 5.142603e-18 | 24 |
| RPS21        | GC IgA     |       |       |              |    |
| 2.940538e-22 | 0.5160116  | 0.842 | 0.592 | 5.242686e-18 | 24 |
| TBCA         | GC IgA     |       |       |              |    |
| 3.096662e-22 | -0.9262331 | 0.139 | 0.33  | 5.521039e-18 | 24 |
| TRBC2        | GC IgA     |       |       |              |    |
| 3.202113e-22 | 0.5292911  | 0.322 | 0.108 | 5.709048e-18 | 24 |
| MAP4K2       | GC IgA     |       |       |              |    |
| 3.297674e-22 | 0.4251044  | 0.954 | 0.806 | 5.879424e-18 | 24 |
| TMA7         | GC IgA     |       |       |              |    |
| 3.424425e-22 | -1.392046  | 0.087 | 0.265 | 6.105408e-18 | 24 |
| S100A4       | GC IgA     |       |       |              |    |
| 3.437582e-22 | 0.5242138  | 0.588 | 0.287 | 6.128865e-18 | 24 |
| DCK          | GC IgA     |       |       |              |    |
| 4.328627e-22 | 0.5442009  | 0.582 | 0.265 | 7.71751e-18  | 24 |
| HHEX         | GC IgA     |       |       |              |    |
| 5.244285e-22 | 0.5292709  | 0.771 | 0.473 | 9.350035e-18 | 24 |
| PRELID1      | GC IgA     |       |       |              |    |
| 5.344155e-22 | -1.236276  | 0.111 | 0.317 | 9.528093e-18 | 24 |
| CD69         | GC IgA     |       |       |              |    |
| 7.706205e-22 | 0.5276027  | 0.641 | 0.344 | 1.373939e-17 | 24 |
| LSM6         | GC IgA     |       |       |              |    |
| 1.070726e-21 | -1.062071  | 0.347 | 0.524 | 1.908997e-17 | 24 |
| ID3          | GC IgA     |       |       |              |    |
| 1.152131e-21 | 0.4740799  | 0.895 | 0.698 | 2.054134e-17 | 24 |
| CCNI         | GC IgA     |       |       |              |    |
| 1.236622e-21 | 0.5754181  | 0.375 | 0.144 | 2.204773e-17 | 24 |
| DNAJC10      | GC IgA     |       |       |              |    |
| 1.551748e-21 | 0.5597118  | 0.498 | 0.228 | 2.766611e-17 | 24 |
| ATM          | GC IgA     |       |       |              |    |
| 1.774203e-21 | 0.4068944  | 0.161 | 0.031 | 3.163227e-17 | 24 |
| XKR6         | GC IgA     |       |       |              |    |
| 1.792127e-21 | 0.6117067  | 0.536 | 0.264 | 3.195183e-17 | 24 |
| GRN          | GC IgA     |       |       |              |    |
| 2.274945e-21 | 0.5755369  | 0.291 | 0.104 | 4.056e-17    | 24 |
| ACSF3        | GC IgA     |       |       |              |    |
| 2.63167e-21  | 0.5274454  | 0.467 | 0.195 | 4.692004e-17 | 24 |
| ETFB         | GC IgA     |       |       |              |    |

|              |                |       |              |              |    |
|--------------|----------------|-------|--------------|--------------|----|
| 3.515853e-21 | 0.4939107      | 0.836 | 0.616        | 6.268414e-17 | 24 |
| NDUFA13      | GC IgA         |       |              |              |    |
| 4.002819e-21 | 0.5698788      | 0.548 | 0.268        | 7.136625e-17 | 24 |
| SEPT9        | GC IgA         |       |              |              |    |
| 6.029432e-21 | 0.5375654      | 0.7   | 0.444        | 1.074987e-16 | 24 |
| ATP5F1C      | GC IgA         |       |              |              |    |
| 6.210064e-21 | 0.3885331      | 0.167 | 0.04         | 1.107192e-16 | 24 |
| DENND6B      | GC IgA         |       |              |              |    |
| 7.301437e-21 | 0.5581923      | 0.598 | 0.311        | 1.301773e-16 | 24 |
| PSIP1        | GC IgA         |       |              |              |    |
| 7.488557e-21 | 0.558028 0.557 | 0.284 | 1.335135e-16 | 24           |    |
| PLEKHF2      | GC IgA         |       |              |              |    |
| 8.145022e-21 | 0.5343255      | 0.709 | 0.433        | 1.452176e-16 | 24 |
| ROM01        | GC IgA         |       |              |              |    |
| 8.151577e-21 | 0.5854784      | 0.362 | 0.142        | 1.453345e-16 | 24 |
| HSH2D        | GC IgA         |       |              |              |    |
| 9.003506e-21 | 0.6809638      | 0.542 | 0.282        | 1.605235e-16 | 24 |
| GNG7         | GC IgA         |       |              |              |    |
| 1.053438e-20 | 0.371353 0.152 | 0.025 | 1.878174e-16 | 24           |    |
| IQCD         | GC IgA         |       |              |              |    |
| 1.237257e-20 | 0.4564738      | 0.214 | 0.061        | 2.205905e-16 | 24 |
| DTX1         | GC IgA         |       |              |              |    |
| 1.275377e-20 | 0.4770252      | 0.885 | 0.696        | 2.27387e-16  | 24 |
| RHOA         | GC IgA         |       |              |              |    |
| 1.414085e-20 | 0.5181756      | 0.854 | 0.63         | 2.521171e-16 | 24 |
| EIF3H        | GC IgA         |       |              |              |    |
| 1.544331e-20 | -1.025853      | 0.322 | 0.513        | 2.753388e-16 | 24 |
| BANK1        | GC IgA         |       |              |              |    |
| 1.662422e-20 | 0.5266249      | 0.635 | 0.336        | 2.963932e-16 | 24 |
| SPIB         | GC IgA         |       |              |              |    |
| 1.935069e-20 | 0.5699205      | 0.517 | 0.261        | 3.450035e-16 | 24 |
| CD2BP2       | GC IgA         |       |              |              |    |
| 1.979839e-20 | -0.917032      | 0.074 | 0.254        | 3.529854e-16 | 24 |
| FCMR         | GC IgA         |       |              |              |    |
| 2.086426e-20 | 0.496166 0.567 | 0.272 | 3.719888e-16 | 24           |    |
| ITGAE        | GC IgA         |       |              |              |    |
| 2.190188e-20 | 0.4302321      | 0.929 | 0.763        | 3.904886e-16 | 24 |
| MYL12A       | GC IgA         |       |              |              |    |
| 2.239046e-20 | 0.5387241      | 0.56  | 0.298        | 3.991995e-16 | 24 |
| ITSN2        | GC IgA         |       |              |              |    |
| 2.285801e-20 | 0.4801948      | 0.272 | 0.074        | 4.075354e-16 | 24 |
| DNASE1       | GC IgA         |       |              |              |    |
| 2.340508e-20 | 0.4910187      | 0.282 | 0.087        | 4.172892e-16 | 24 |
| MAP4K4       | GC IgA         |       |              |              |    |
| 2.498895e-20 | 0.5394979      | 0.452 | 0.203        | 4.455279e-16 | 24 |
| MTMR14       | GC IgA         |       |              |              |    |
| 2.85118e-20  | 0.4508427      | 0.898 | 0.696        | 5.083369e-16 | 24 |
| CIRBP        | GC IgA         |       |              |              |    |
| 3.056942e-20 | -0.4067749     | 0.994 | 0.999        | 5.450222e-16 | 24 |
| RPL32        | GC IgA         |       |              |              |    |

|              |                |       |              |              |    |
|--------------|----------------|-------|--------------|--------------|----|
| 3.680967e-20 | 0.5300062      | 0.616 | 0.348        | 6.562796e-16 | 24 |
| LSM14A       | GC IgA         |       |              |              |    |
| 3.767822e-20 | 0.5522706      | 0.359 | 0.125        | 6.71765e-16  | 24 |
| AMFR         | GC IgA         |       |              |              |    |
| 3.785379e-20 | 0.521973 0.245 | 0.066 | 6.748953e-16 | 24           |    |
| TEX9         | GC IgA         |       |              |              |    |
| 3.792123e-20 | 0.4421506      | 0.26  | 0.073        | 6.760976e-16 | 24 |
| DOK3         | GC IgA         |       |              |              |    |
| 4.037181e-20 | 0.5722476      | 0.514 | 0.248        | 7.197891e-16 | 24 |
| WIPF1        | GC IgA         |       |              |              |    |
| 4.189387e-20 | 0.5252055      | 0.245 | 0.077        | 7.469258e-16 | 24 |
| FAM45A       | GC IgA         |       |              |              |    |
| 4.606388e-20 | 0.5329164      | 0.483 | 0.229        | 8.212729e-16 | 24 |
| SEPT1        | GC IgA         |       |              |              |    |
| 4.746861e-20 | -0.9963856     | 0.115 | 0.298        | 8.463178e-16 | 24 |
| LINC00926    | GC IgA         |       |              |              |    |
| 4.91154e-20  | 0.4609787      | 0.18  | 0.052        | 8.756784e-16 | 24 |
| CDKN2C       | GC IgA         |       |              |              |    |
| 5.057953e-20 | 0.4815932      | 0.867 | 0.634        | 9.017825e-16 | 24 |
| UQCRH        | GC IgA         |       |              |              |    |
| 5.387152e-20 | 0.570117 0.492 | 0.237 | 9.604753e-16 | 24           |    |
| ZBTB80S      | GC IgA         |       |              |              |    |
| 5.773309e-20 | 0.4442444      | 0.873 | 0.652        | 1.029323e-15 | 24 |
| ATP5F1A      | GC IgA         |       |              |              |    |
| 6.097219e-20 | 0.5820094      | 0.582 | 0.321        | 1.087073e-15 | 24 |
| HSBP1        | GC IgA         |       |              |              |    |
| 7.992701e-20 | 0.567909 0.279 | 0.098 | 1.425019e-15 | 24           |    |
| FAM241A      | GC IgA         |       |              |              |    |
| 8.008792e-20 | 0.4560879      | 0.858 | 0.606        | 1.427888e-15 | 24 |
| POLR2L       | GC IgA         |       |              |              |    |
| 8.812522e-20 | 0.5301833      | 0.31  | 0.116        | 1.571184e-15 | 24 |
| ACYP2        | GC IgA         |       |              |              |    |
| 9.315968e-20 | -0.8013526     | 0.077 | 0.249        | 1.660944e-15 | 24 |
| TNFRSF13B    | GC IgA         |       |              |              |    |
| 1.071196e-19 | 0.6535091      | 0.307 | 0.108        | 1.909835e-15 | 24 |
| VPREB3       | GC IgA         |       |              |              |    |
| 1.166598e-19 | 0.5743627      | 0.467 | 0.231        | 2.079928e-15 | 24 |
| MTF2         | GC IgA         |       |              |              |    |
| 1.176208e-19 | 0.3750971      | 0.146 | 0.023        | 2.097062e-15 | 24 |
| MAP3K7CL     | GC IgA         |       |              |              |    |
| 1.232609e-19 | 0.5615962      | 0.585 | 0.312        | 2.197619e-15 | 24 |
| SPI1         | GC IgA         |       |              |              |    |
| 1.382484e-19 | 0.5322324      | 0.406 | 0.167        | 2.464831e-15 | 24 |
| CYB5R3       | GC IgA         |       |              |              |    |
| 1.524233e-19 | 0.5052416      | 0.331 | 0.125        | 2.717555e-15 | 24 |
| COMMD4       | GC IgA         |       |              |              |    |
| 1.536384e-19 | 0.5030525      | 0.604 | 0.307        | 2.739218e-15 | 24 |
| PGLS         | GC IgA         |       |              |              |    |
| 1.909878e-19 | 0.7124954      | 0.768 | 0.502        | 3.405121e-15 | 24 |
| HLA-DRB5     | GC IgA         |       |              |              |    |

|              |           |       |       |              |    |
|--------------|-----------|-------|-------|--------------|----|
| 2.150929e-19 | 0.4584778 | 0.211 | 0.062 | 3.834892e-15 | 24 |
| FAM129A      | GC IgA    |       |       |              |    |
| 2.15573e-19  | 0.5615809 | 0.536 | 0.282 | 3.843451e-15 | 24 |
| PRDX3        | GC IgA    |       |       |              |    |
| 2.356662e-19 | 0.4999826 | 0.201 | 0.048 | 4.201692e-15 | 24 |
| LINC01991    | GC IgA    |       |       |              |    |
| 2.80302e-19  | 0.3640842 | 0.124 | 0.02  | 4.997505e-15 | 24 |
| ANK1         | GC IgA    |       |       |              |    |
| 3.084587e-19 | 0.5108026 | 0.266 | 0.086 | 5.499511e-15 | 24 |
| PTK2B        | GC IgA    |       |       |              |    |
| 3.797929e-19 | 0.3984391 | 0.854 | 0.624 | 6.771328e-15 | 24 |
| HLA-DMB      | GC IgA    |       |       |              |    |
| 3.932062e-19 | 0.5287205 | 0.415 | 0.179 | 7.010473e-15 | 24 |
| ZNF106       | GC IgA    |       |       |              |    |
| 4.698129e-19 | 0.5472057 | 0.477 | 0.205 | 8.376294e-15 | 24 |
| SNHG25       | GC IgA    |       |       |              |    |
| 5.325439e-19 | 0.4441149 | 0.743 | 0.476 | 9.494726e-15 | 24 |
| GRB2         | GC IgA    |       |       |              |    |
| 5.35813e-19  | 0.4921346 | 0.728 | 0.476 | 9.55301e-15  | 24 |
| UBE2N        | GC IgA    |       |       |              |    |
| 6.514205e-19 | 0.5141402 | 0.158 | 0.033 | 1.161418e-14 | 24 |
| AC012368.1   | GC IgA    |       |       |              |    |
| 6.982969e-19 | 0.5120718 | 0.743 | 0.514 | 1.244994e-14 | 24 |
| CAPZB        | GC IgA    |       |       |              |    |
| 7.052399e-19 | 0.3475079 | 0.981 | 0.903 | 1.257372e-14 | 24 |
| SRP14        | GC IgA    |       |       |              |    |
| 7.723415e-19 | -0.426004 | 0.994 | 0.993 | 1.377008e-14 | 24 |
| RPS5         | GC IgA    |       |       |              |    |
| 8.517929e-19 | 0.5137445 | 0.656 | 0.375 | 1.518661e-14 | 24 |
| ZFAND6       | GC IgA    |       |       |              |    |
| 8.63065e-19  | 0.4516381 | 0.251 | 0.077 | 1.538759e-14 | 24 |
| WEE1         | GC IgA    |       |       |              |    |
| 8.857939e-19 | 0.5324849 | 0.548 | 0.293 | 1.579282e-14 | 24 |
| LYPLA1       | GC IgA    |       |       |              |    |
| 8.910501e-19 | 0.5257918 | 0.3   | 0.102 | 1.588653e-14 | 24 |
| SORL1        | GC IgA    |       |       |              |    |
| 9.268078e-19 | 0.4270281 | 0.186 | 0.049 | 1.652406e-14 | 24 |
| PEX5         | GC IgA    |       |       |              |    |
| 9.459058e-19 | 0.5429746 | 0.591 | 0.335 | 1.686455e-14 | 24 |
| COX14        | GC IgA    |       |       |              |    |
| 9.744299e-19 | 0.532705  | 0.263 | 0.09  | 1.737311e-14 | 24 |
| GCSAM        | GC IgA    |       |       |              |    |
| 1.027228e-18 | 0.4911987 | 0.693 | 0.423 | 1.831445e-14 | 24 |
| CD40         | GC IgA    |       |       |              |    |
| 1.245691e-18 | 0.5270653 | 0.56  | 0.279 | 2.220943e-14 | 24 |
| JPT1         | GC IgA    |       |       |              |    |
| 1.271148e-18 | 0.4033523 | 0.895 | 0.673 | 2.26633e-14  | 24 |
| ATP5ME       | GC IgA    |       |       |              |    |
| 1.561989e-18 | 0.3518254 | 0.161 | 0.036 | 2.78487e-14  | 24 |
| PRDM15       | GC IgA    |       |       |              |    |

|              |                |       |       |              |     |
|--------------|----------------|-------|-------|--------------|-----|
| 1.658783e-18 | -0.7502333     | 0.062 | 0.211 | 2.957445e-14 | 24  |
| MGST3        | GC IgA         |       |       |              |     |
| 1.682782e-18 | 0.475652 0.276 | 0.086 |       | 3.000232e-14 | 24  |
| DENND2D      | GC IgA         |       |       |              |     |
| 1.727243e-18 | 0.5199239      | 0.421 | 0.173 | 3.079502e-14 | 24  |
| EHMT1        | GC IgA         |       |       |              |     |
| 1.738363e-18 | 0.5042094      | 0.594 | 0.321 | 3.099327e-14 | 24  |
| IMP4         | GC IgA         |       |       |              |     |
| 1.886296e-18 | 0.5321484      | 0.356 | 0.145 | 3.363078e-14 | 24  |
| RBM38        | GC IgA         |       |       |              |     |
| 1.971236e-18 | 0.4068608      | 0.907 | 0.706 | 3.514517e-14 | 24  |
| NDUFA4       | GC IgA         |       |       |              |     |
| 1.972522e-18 | 0.4785331      | 0.176 | 0.05  | 3.516809e-14 | 24  |
| CPM          | GC IgA         |       |       |              |     |
| 2.467531e-18 | 0.4314601      | 0.238 | 0.069 | 4.39936e-14  | 24  |
| MTA3         | GC IgA         |       |       |              |     |
| 2.475581e-18 | 0.4478172      | 0.839 | 0.613 | 4.413714e-14 | 24  |
| UQCR10       | GC IgA         |       |       |              |     |
| 3.119087e-18 | 0.4838673      | 0.297 | 0.111 | 5.56102e-14  | 24  |
| BRI3BP       | GC IgA         |       |       |              |     |
| 3.514268e-18 | 0.4799216      | 0.257 | 0.082 | 6.265589e-14 | 24  |
| PARN         | GC IgA         |       |       |              |     |
| 4.382269e-18 | -0.3839316     | 1     | 0.997 | 7.813147e-14 | 24  |
| RPS3A        | GC IgA         |       |       |              |     |
| 4.7727e-18   | 0.4970435      | 0.245 | 0.074 | 8.509247e-14 | 24  |
| TMED8        | GC IgA         |       |       |              |     |
| 4.963136e-18 | -0.3424981     | 1     | 0.999 | 8.848776e-14 | 24  |
| RPL13A       | GC IgA         |       |       |              |     |
| 5.594947e-18 | 0.4833 0.266   | 0.091 |       | 9.975232e-14 | 24  |
| FAM208B      | GC IgA         |       |       |              |     |
| 5.996866e-18 | 0.470228 0.449 | 0.209 |       | 1.069181e-13 | 24  |
| GC IgA       |                |       |       |              | ADA |
| 6.016359e-18 | -0.5331613     | 0.985 | 0.985 | 1.072657e-13 | 24  |
| RPL27        | GC IgA         |       |       |              |     |
| 6.234933e-18 | -0.4145652     | 1     | 0.999 | 1.111626e-13 | 24  |
| RPL39        | GC IgA         |       |       |              |     |
| 7.16298e-18  | 0.4128245      | 0.155 | 0.033 | 1.277088e-13 | 24  |
| MCTP2        | GC IgA         |       |       |              |     |
| 7.677059e-18 | -0.7044308     | 0.028 | 0.164 | 1.368743e-13 | 24  |
| MARCKS       | GC IgA         |       |       |              |     |
| 8.425836e-18 | 0.4742878      | 0.325 | 0.119 | 1.502242e-13 | 24  |
| CD180        | GC IgA         |       |       |              |     |
| 8.667165e-18 | 0.431459 0.257 | 0.08  |       | 1.545269e-13 | 24  |
| VGLL4        | GC IgA         |       |       |              |     |
| 9.830606e-18 | 0.4743013      | 0.728 | 0.488 | 1.752699e-13 | 24  |
| CCT8         | GC IgA         |       |       |              |     |
| 1.017317e-17 | 0.507688 0.303 | 0.115 |       | 1.813775e-13 | 24  |
| C12orf49     | GC IgA         |       |       |              |     |
| 1.254293e-17 | -0.4025923     | 0.997 | 0.999 | 2.23628e-13  | 24  |
| EEF1A1       | GC IgA         |       |       |              |     |

|              |                |       |             |              |    |
|--------------|----------------|-------|-------------|--------------|----|
| 1.270439e-17 | 0.4946197      | 0.378 | 0.164       | 2.265065e-13 | 24 |
| TOR3A        | GC IgA         |       |             |              |    |
| 1.385125e-17 | 0.4772495      | 0.533 | 0.252       | 2.469539e-13 | 24 |
| TBC1D10C     | GC IgA         |       |             |              |    |
| 1.427194e-17 | -0.4268915     | 1     | 0.998       | 2.544545e-13 | 24 |
| RPL11        | GC IgA         |       |             |              |    |
| 1.469942e-17 | 0.318503 0.133 | 0.025 | 2.62076e-13 | 24           |    |
| AC022167.3   | GC IgA         |       |             |              |    |
| 1.7133e-17   | 0.5817524      | 0.48  | 0.244       | 3.054643e-13 | 24 |
| TPM4         | GC IgA         |       |             |              |    |
| 1.726857e-17 | -0.9474329     | 0.059 | 0.212       | 3.078813e-13 | 24 |
| PLAC8        | GC IgA         |       |             |              |    |
| 1.942808e-17 | 0.4946307      | 0.508 | 0.254       | 3.463832e-13 | 24 |
| LYSMD2       | GC IgA         |       |             |              |    |
| 2.170148e-17 | 0.4471986      | 0.223 | 0.069       | 3.869157e-13 | 24 |
| ST14         | GC IgA         |       |             |              |    |
| 2.172667e-17 | -1.059543      | 0.102 | 0.275       | 3.873649e-13 | 24 |
| KLF2         | GC IgA         |       |             |              |    |
| 2.234583e-17 | 0.3676775      | 0.904 | 0.701       | 3.984038e-13 | 24 |
| COMMD6       | GC IgA         |       |             |              |    |
| 2.301655e-17 | 0.5434848      | 0.563 | 0.32        | 4.10362e-13  | 24 |
| NAA38        | GC IgA         |       |             |              |    |
| 2.501783e-17 | 0.5113836      | 0.307 | 0.115       | 4.460429e-13 | 24 |
| KLHL5        | GC IgA         |       |             |              |    |
| 2.522758e-17 | 0.4817221      | 0.632 | 0.384       | 4.497826e-13 | 24 |
| NDUFB3       | GC IgA         |       |             |              |    |
| 2.563834e-17 | 0.5463988      | 0.356 | 0.146       | 4.571059e-13 | 24 |
| ALOX5        | GC IgA         |       |             |              |    |
| 2.782683e-17 | -0.3589296     | 1     | 0.999       | 4.961245e-13 | 24 |
| RPS27A       | GC IgA         |       |             |              |    |
| 3.527868e-17 | 0.4513735      | 0.789 | 0.565       | 6.289836e-13 | 24 |
| RAC1         | GC IgA         |       |             |              |    |
| 3.656895e-17 | 0.4095649      | 0.235 | 0.071       | 6.519879e-13 | 24 |
| NEK6         | GC IgA         |       |             |              |    |
| 3.82848e-17  | 0.4215102      | 0.799 | 0.552       | 6.825797e-13 | 24 |
| SEC61G       | GC IgA         |       |             |              |    |
| 4.442519e-17 | -0.7369007     | 0.04  | 0.173       | 7.920567e-13 | 24 |
| TNFRSF18     | GC IgA         |       |             |              |    |
| 4.696648e-17 | 0.4927292      | 0.331 | 0.129       | 8.373654e-13 | 24 |
| KMT2A        | GC IgA         |       |             |              |    |
| 4.871434e-17 | 0.5614329      | 0.254 | 0.083       | 8.685279e-13 | 24 |
| SH3TC1       | GC IgA         |       |             |              |    |
| 5.029205e-17 | 0.3185251      | 0.988 | 0.923       | 8.96657e-13  | 24 |
| BTF3         | GC IgA         |       |             |              |    |
| 5.236513e-17 | -0.777353      | 0.214 | 0.381       | 9.336179e-13 | 24 |
| PDCD4        | GC IgA         |       |             |              |    |
| 6.44047e-17  | 0.4136803      | 0.864 | 0.643       | 1.148271e-12 | 24 |
| HNRNPC       | GC IgA         |       |             |              |    |
| 6.615259e-17 | 0.3167333      | 0.118 | 0.023       | 1.179435e-12 | 24 |
| AC090152.1   | GC IgA         |       |             |              |    |

|              |                |       |              |              |    |
|--------------|----------------|-------|--------------|--------------|----|
| 8.452457e-17 | 0.4676551      | 0.399 | 0.175        | 1.506989e-12 | 24 |
| SYK          | GC IgA         |       |              |              |    |
| 8.711957e-17 | 0.5222054      | 0.464 | 0.235        | 1.553255e-12 | 24 |
| DSTN         | GC IgA         |       |              |              |    |
| 8.735684e-17 | 0.3471754      | 0.966 | 0.881        | 1.557485e-12 | 24 |
| MS4A1        | GC IgA         |       |              |              |    |
| 8.907456e-17 | 0.420564 0.207 | 0.057 | 1.58811e-12  | 24           |    |
| SLC15A4      | GC IgA         |       |              |              |    |
| 8.908715e-17 | 0.5451318      | 0.675 | 0.45         | 1.588335e-12 | 24 |
| MAP1LC3B     | GC IgA         |       |              |              |    |
| 9.954129e-17 | 0.4104386      | 0.861 | 0.668        | 1.774722e-12 | 24 |
| SNX3         | GC IgA         |       |              |              |    |
| 1.113605e-16 | -0.4638719     | 0.994 | 0.991        | 1.985446e-12 | 24 |
| RPL30        | GC IgA         |       |              |              |    |
| 1.169793e-16 | 0.5358001      | 0.272 | 0.107        | 2.085624e-12 | 24 |
| PHF6         | GC IgA         |       |              |              |    |
| 1.292226e-16 | 0.4539188      | 0.229 | 0.074        | 2.303909e-12 | 24 |
| CUX1         | GC IgA         |       |              |              |    |
| 1.380852e-16 | 0.4986444      | 0.65  | 0.412        | 2.461921e-12 | 24 |
| HCLS1        | GC IgA         |       |              |              |    |
| 1.438663e-16 | -0.4129435     | 0.994 | 0.993        | 2.564992e-12 | 24 |
| RPL35        | GC IgA         |       |              |              |    |
| 1.555853e-16 | 0.4973399      | 0.644 | 0.389        | 2.773931e-12 | 24 |
| ARPC4        | GC IgA         |       |              |              |    |
| 1.602657e-16 | 0.358478 0.136 | 0.034 | 2.857378e-12 | 24           |    |
| NUGGC        | GC IgA         |       |              |              |    |
| 1.68933e-16  | 0.4526598      | 0.588 | 0.33         | 3.011907e-12 | 24 |
| BPTF         | GC IgA         |       |              |              |    |
| 1.850777e-16 | -1.099809      | 0.307 | 0.457        | 3.29975e-12  | 24 |
| JUNB         | GC IgA         |       |              |              |    |
| 1.879647e-16 | 0.437938 0.743 | 0.483 | 3.351223e-12 | 24           |    |
| UBE2L3       | GC IgA         |       |              |              |    |
| 1.893386e-16 | 0.4042274      | 0.675 | 0.421        | 3.375719e-12 | 24 |
| GABARAPL2    | GC IgA         |       |              |              |    |
| 1.925615e-16 | 0.4681657      | 0.653 | 0.401        | 3.433179e-12 | 24 |
| STX7         | GC IgA         |       |              |              |    |
| 1.958616e-16 | -0.4214998     | 0.997 | 0.995        | 3.492016e-12 | 24 |
| RPL31        | GC IgA         |       |              |              |    |
| 2.000183e-16 | 0.4434244      | 0.749 | 0.49         | 3.566126e-12 | 24 |
| RAC2         | GC IgA         |       |              |              |    |
| 2.400232e-16 | 0.5005208      | 0.402 | 0.188        | 4.279374e-12 | 24 |
| RFC1         | GC IgA         |       |              |              |    |
| 2.592699e-16 | 0.3383336      | 0.864 | 0.634        | 4.622523e-12 | 24 |
| HERPUD1      | GC IgA         |       |              |              |    |
| 2.687325e-16 | 0.5090547      | 0.452 | 0.233        | 4.791232e-12 | 24 |
| ZCCHC7       | GC IgA         |       |              |              |    |
| 2.845819e-16 | -0.3565587     | 0.994 | 0.995        | 5.07381e-12  | 24 |
| RPL37A       | GC IgA         |       |              |              |    |
| 2.875724e-16 | -0.3193725     | 0.994 | 0.998        | 5.127127e-12 | 24 |
| RPL18A       | GC IgA         |       |              |              |    |



|              |            |       |       |              |    |
|--------------|------------|-------|-------|--------------|----|
| 3.182303e-16 | 0.4147653  | 0.217 | 0.074 | 5.673728e-12 | 24 |
| EZH2         | GC IgA     |       |       |              |    |
| 3.289197e-16 | 0.4557507  | 0.548 | 0.282 | 5.864309e-12 | 24 |
| CARHSP1      | GC IgA     |       |       |              |    |
| 3.513818e-16 | -0.7518025 | 0.087 | 0.238 | 6.264787e-12 | 24 |
| CAPG         | GC IgA     |       |       |              |    |
| 3.543965e-16 | 0.4620462  | 0.399 | 0.189 | 6.318534e-12 | 24 |
| LBR          | GC IgA     |       |       |              |    |
| 3.863147e-16 | 0.4355923  | 0.241 | 0.081 | 6.887604e-12 | 24 |
| GPR18        | GC IgA     |       |       |              |    |
| 3.972074e-16 | 0.4301159  | 0.508 | 0.209 | 7.081811e-12 | 24 |
| PLCG2        | GC IgA     |       |       |              |    |
| 4.22401e-16  | 0.4472037  | 0.768 | 0.532 | 7.530987e-12 | 24 |
| SOD1         | GC IgA     |       |       |              |    |
| 4.288482e-16 | 0.4895316  | 0.3   | 0.12  | 7.645934e-12 | 24 |
| SSBP2        | GC IgA     |       |       |              |    |
| 4.30685e-16  | 0.4749869  | 0.536 | 0.299 | 7.678683e-12 | 24 |
| ATP6V0D1     | GC IgA     |       |       |              |    |
| 4.366595e-16 | 0.4677248  | 0.56  | 0.314 | 7.785203e-12 | 24 |
| NDUFAF3      | GC IgA     |       |       |              |    |
| 4.750722e-16 | -0.7992744 | 0.167 | 0.321 | 8.470063e-12 | 24 |
| TUBA1A       | GC IgA     |       |       |              |    |
| 5.089923e-16 | 0.501279   | 0.393 | 0.194 | 9.074823e-12 | 24 |
| GRSF1        | GC IgA     |       |       |              |    |
| 5.142601e-16 | 0.4752445  | 0.498 | 0.252 | 9.168742e-12 | 24 |
| MPC2         | GC IgA     |       |       |              |    |
| 5.455361e-16 | 0.4446647  | 0.3   | 0.111 | 9.726362e-12 | 24 |
| PIP4K2A      | GC IgA     |       |       |              |    |
| 5.608452e-16 | -0.7126176 | 0.037 | 0.159 | 9.999308e-12 | 24 |
| LMNA         | GC IgA     |       |       |              |    |
| 5.873255e-16 | 0.4634915  | 0.303 | 0.124 | 1.047143e-11 | 24 |
| ARL3         | GC IgA     |       |       |              |    |
| 6.797465e-16 | 0.4013134  | 0.811 | 0.577 | 1.21192e-11  | 24 |
| COPE         | GC IgA     |       |       |              |    |
| 7.707112e-16 | 0.4519415  | 0.498 | 0.261 | 1.374101e-11 | 24 |
| THOC7        | GC IgA     |       |       |              |    |
| 8.220344e-16 | 0.4743992  | 0.567 | 0.347 | 1.465605e-11 | 24 |
| S100A10      | GC IgA     |       |       |              |    |
| 9.063545e-16 | 0.5982604  | 0.743 | 0.496 | 1.615939e-11 | 24 |
| SAT1         | GC IgA     |       |       |              |    |
| 1.102874e-15 | 0.4810485  | 0.294 | 0.111 | 1.966313e-11 | 24 |
| TRAC         | GC IgA     |       |       |              |    |
| 1.107943e-15 | 0.3597238  | 0.941 | 0.804 | 1.975351e-11 | 24 |
| HNRNPK       | GC IgA     |       |       |              |    |
| 1.221551e-15 | -0.5435074 | 0.978 | 0.974 | 2.177903e-11 | 24 |
| MT-ND4       | GC IgA     |       |       |              |    |
| 1.513557e-15 | 0.4995112  | 0.198 | 0.068 | 2.698521e-11 | 24 |
| EYA3         | GC IgA     |       |       |              |    |
| 1.719229e-15 | -0.8538762 | 0.121 | 0.279 | 3.065213e-11 | 24 |
| ADAM28       | GC IgA     |       |       |              |    |

|              |            |       |       |              |    |
|--------------|------------|-------|-------|--------------|----|
| 1.780772e-15 | 0.3302849  | 0.139 | 0.036 | 3.174938e-11 | 24 |
| MSRB2        | GC IgA     |       |       |              |    |
| 2.137416e-15 | 0.3168321  | 0.136 | 0.033 | 3.810799e-11 | 24 |
| KANK1        | GC IgA     |       |       |              |    |
| 2.18003e-15  | 0.4290982  | 0.26  | 0.103 | 3.886776e-11 | 24 |
| OTULIN       | GC IgA     |       |       |              |    |
| 2.415765e-15 | 0.3988742  | 0.158 | 0.036 | 4.307068e-11 | 24 |
| IGLC5        | GC IgA     |       |       |              |    |
| 2.612661e-15 | 0.4588893  | 0.381 | 0.176 | 4.658113e-11 | 24 |
| PMVK         | GC IgA     |       |       |              |    |
| 3.008272e-15 | 0.4475478  | 0.384 | 0.176 | 5.363449e-11 | 24 |
| LAP3         | GC IgA     |       |       |              |    |
| 3.324659e-15 | 0.497928   | 0.492 | 0.263 | 5.927535e-11 | 24 |
| VASP         | GC IgA     |       |       |              |    |
| 3.835449e-15 | 0.3758545  | 0.851 | 0.626 | 6.838223e-11 | 24 |
| ATP5F1B      | GC IgA     |       |       |              |    |
| 3.925991e-15 | -0.6067344 | 0.978 | 0.976 | 6.999649e-11 | 24 |
| FTH1         | GC IgA     |       |       |              |    |
| 4.021737e-15 | 0.4222495  | 0.563 | 0.314 | 7.170355e-11 | 24 |
| SCAND1       | GC IgA     |       |       |              |    |
| 4.201464e-15 | 0.4107222  | 0.232 | 0.087 | 7.490791e-11 | 24 |
| VEZT         | GC IgA     |       |       |              |    |
| 4.522024e-15 | 0.4390773  | 0.437 | 0.205 | 8.062316e-11 | 24 |
| HADHB        | GC IgA     |       |       |              |    |
| 5.625163e-15 | 0.4712222  | 0.656 | 0.429 | 1.00291e-10  | 24 |
| CLTA         | GC IgA     |       |       |              |    |
| 5.983389e-15 | 0.4302015  | 0.808 | 0.604 | 1.066778e-10 | 24 |
| RBM3         | GC IgA     |       |       |              |    |
| 6.117372e-15 | 0.3810591  | 0.217 | 0.072 | 1.090666e-10 | 24 |
| ACSL5        | GC IgA     |       |       |              |    |
| 6.526989e-15 | 0.4496351  | 0.591 | 0.344 | 1.163697e-10 | 24 |
| H2AFY        | GC IgA     |       |       |              |    |
| 6.680501e-15 | 0.3939814  | 0.167 | 0.045 | 1.191066e-10 | 24 |
| FCH01        | GC IgA     |       |       |              |    |
| 6.757423e-15 | 0.3646015  | 0.867 | 0.667 | 1.204781e-10 | 24 |
| GDI2         | GC IgA     |       |       |              |    |
| 7.051232e-15 | 0.4514852  | 0.226 | 0.075 | 1.257164e-10 | 24 |
| RGCC         | GC IgA     |       |       |              |    |
| 7.398788e-15 | 0.4038967  | 0.248 | 0.087 | 1.31913e-10  | 24 |
| CHIC2        | GC IgA     |       |       |              |    |
| 7.416502e-15 | 0.5158752  | 0.272 | 0.093 | 1.322288e-10 | 24 |
| RNGTT        | GC IgA     |       |       |              |    |
| 7.534157e-15 | 0.3793992  | 0.57  | 0.312 | 1.343265e-10 | 24 |
| HMG3         | GC IgA     |       |       |              |    |
| 8.403386e-15 | 0.4163538  | 0.669 | 0.418 | 1.49824e-10  | 24 |
| HNRNPD       | GC IgA     |       |       |              |    |
| 8.712237e-15 | -0.4738981 | 0.963 | 0.968 | 1.553305e-10 | 24 |
| RPS17        | GC IgA     |       |       |              |    |
| 9.420807e-15 | 0.3698237  | 0.805 | 0.557 | 1.679636e-10 | 24 |
| ATP5PF       | GC IgA     |       |       |              |    |

|              |            |       |       |              |    |
|--------------|------------|-------|-------|--------------|----|
| 1.017846e-14 | 0.4458731  | 0.601 | 0.364 | 1.814717e-10 | 24 |
| PDIA3        | GC IgA     |       |       |              |    |
| 1.085965e-14 | 0.4541882  | 0.625 | 0.387 | 1.936167e-10 | 24 |
| CUTA         | GC IgA     |       |       |              |    |
| 1.149526e-14 | 0.4661568  | 0.579 | 0.336 | 2.049491e-10 | 24 |
| NDUFC1       | GC IgA     |       |       |              |    |
| 1.276151e-14 | 0.4245084  | 0.307 | 0.128 | 2.275249e-10 | 24 |
| ETS1         | GC IgA     |       |       |              |    |
| 1.394821e-14 | 0.421296   | 0.752 | 0.534 | 2.486826e-10 | 24 |
| CAP1         | GC IgA     |       |       |              |    |
| 1.76002e-14  | 0.4580446  | 0.322 | 0.14  | 3.13794e-10  | 24 |
| IN080C       | GC IgA     |       |       |              |    |
| 1.902332e-14 | 0.4469147  | 0.325 | 0.133 | 3.391667e-10 | 24 |
| CERS4        | GC IgA     |       |       |              |    |
| 1.953609e-14 | 0.4189479  | 0.734 | 0.502 | 3.483089e-10 | 24 |
| EIF3I        | GC IgA     |       |       |              |    |
| 2.273937e-14 | -0.4318324 | 0.988 | 0.984 | 4.054202e-10 | 24 |
| RPL29        | GC IgA     |       |       |              |    |
| 2.277971e-14 | 0.4992068  | 0.467 | 0.249 | 4.061395e-10 | 24 |
| TIFA         | GC IgA     |       |       |              |    |
| 2.318154e-14 | 0.4095101  | 0.17  | 0.048 | 4.133037e-10 | 24 |
| MYL5         | GC IgA     |       |       |              |    |
| 2.37808e-14  | 0.4642321  | 0.44  | 0.242 | 4.23988e-10  | 24 |
| ETFA         | GC IgA     |       |       |              |    |
| 2.775661e-14 | 0.3209645  | 0.155 | 0.042 | 4.948727e-10 | 24 |
| IKBKE        | GC IgA     |       |       |              |    |
| 2.824358e-14 | 0.4433391  | 0.61  | 0.365 | 5.035547e-10 | 24 |
| RPS19BP1     | GC IgA     |       |       |              |    |
| 2.835516e-14 | 0.3518621  | 0.901 | 0.721 | 5.055442e-10 | 24 |
| COX6C        | GC IgA     |       |       |              |    |
| 2.893234e-14 | -0.7479319 | 0.802 | 0.644 | 5.158347e-10 | 24 |
| IGLC2        | GC IgA     |       |       |              |    |
| 3.272433e-14 | 0.4782923  | 0.449 | 0.242 | 5.83442e-10  | 24 |
| WAS          | GC IgA     |       |       |              |    |
| 3.484516e-14 | 0.3594045  | 0.867 | 0.662 | 6.212543e-10 | 24 |
| DBI          | GC IgA     |       |       |              |    |
| 3.619245e-14 | 0.3588525  | 0.18  | 0.06  | 6.452751e-10 | 24 |
| TESC         | GC IgA     |       |       |              |    |
| 3.988232e-14 | -0.7347989 | 0.706 | 0.794 | 7.110619e-10 | 24 |
| HLA-E        | GC IgA     |       |       |              |    |
| 4.041726e-14 | 0.3592242  | 0.854 | 0.639 | 7.205994e-10 | 24 |
| ATP5MF       | GC IgA     |       |       |              |    |
| 4.056308e-14 | 0.3365718  | 0.105 | 0.022 | 7.231992e-10 | 24 |
| FAM81A       | GC IgA     |       |       |              |    |
| 4.643263e-14 | 0.3895606  | 0.254 | 0.096 | 8.278474e-10 | 24 |
| CCDC28B      | GC IgA     |       |       |              |    |
| 5.080609e-14 | 0.4448567  | 0.579 | 0.364 | 9.058217e-10 | 24 |
| RBBP7        | GC IgA     |       |       |              |    |
| 5.173425e-14 | 0.4371124  | 0.378 | 0.171 | 9.223699e-10 | 24 |
| CDK13        | GC IgA     |       |       |              |    |

|              |                |       |              |              |    |
|--------------|----------------|-------|--------------|--------------|----|
| 5.278985e-14 | 0.4057378      | 0.7   | 0.455        | 9.411902e-10 | 24 |
| COX17        | GC IgA         |       |              |              |    |
| 5.778623e-14 | 0.3680016      | 0.885 | 0.706        | 1.030271e-09 | 24 |
| COX7A2       | GC IgA         |       |              |              |    |
| 5.888684e-14 | -0.6768063     | 0.068 | 0.196        | 1.049893e-09 | 24 |
| CLEC2B       | GC IgA         |       |              |              |    |
| 6.234886e-14 | 0.4276567      | 0.279 | 0.108        | 1.111618e-09 | 24 |
| RAB11FIP1    | GC IgA         |       |              |              |    |
| 6.294627e-14 | 0.4128803      | 0.186 | 0.062        | 1.122269e-09 | 24 |
| ZNF608       | GC IgA         |       |              |              |    |
| 7.626624e-14 | 0.4445638      | 0.198 | 0.062        | 1.359751e-09 | 24 |
| HOPX         | GC IgA         |       |              |              |    |
| 7.707838e-14 | 0.341817 0.124 | 0.03  | 1.37423e-09  | 24           |    |
| RNF144B      | GC IgA         |       |              |              |    |
| 7.782101e-14 | 0.4075874      | 0.322 | 0.139        | 1.387471e-09 | 24 |
| MKNK2        | GC IgA         |       |              |              |    |
| 8.586486e-14 | 0.415748 0.254 | 0.098 | 1.530885e-09 | 24           |    |
| SYVN1        | GC IgA         |       |              |              |    |
| 8.951039e-14 | -0.8429342     | 0.204 | 0.348        | 1.595881e-09 | 24 |
| TRAF3IP3     | GC IgA         |       |              |              |    |
| 9.41778e-14  | -0.4733632     | 0.957 | 0.965        | 1.679096e-09 | 24 |
| RPL38        | GC IgA         |       |              |              |    |
| 9.866214e-14 | 0.3287686      | 0.892 | 0.729        | 1.759047e-09 | 24 |
| OST4         | GC IgA         |       |              |              |    |
| 9.88212e-14  | 0.4176933      | 0.56  | 0.332        | 1.761883e-09 | 24 |
| NDUFS7       | GC IgA         |       |              |              |    |
| 1.075652e-13 | 0.3011036      | 0.858 | 0.597        | 1.91778e-09  | 24 |
| PRDX1        | GC IgA         |       |              |              |    |
| 1.136589e-13 | 0.3763895      | 0.402 | 0.208        | 2.026424e-09 | 24 |
| SYAP1        | GC IgA         |       |              |              |    |
| 1.161322e-13 | 0.3902927      | 0.622 | 0.382        | 2.07052e-09  | 24 |
| EVL          | GC IgA         |       |              |              |    |
| 1.183321e-13 | 0.3335986      | 0.13  | 0.031        | 2.109743e-09 | 24 |
| PTAFR        | GC IgA         |       |              |              |    |
| 1.187088e-13 | 0.3832827      | 0.533 | 0.291        | 2.116458e-09 | 24 |
| BCL11A       | GC IgA         |       |              |              |    |
| 1.415274e-13 | 0.4163817      | 0.372 | 0.169        | 2.523292e-09 | 24 |
| COMMD7       | GC IgA         |       |              |              |    |
| 1.428993e-13 | 0.3326954      | 0.842 | 0.646        | 2.547751e-09 | 24 |
| UQCR11       | GC IgA         |       |              |              |    |
| 1.510834e-13 | 0.3611587      | 0.656 | 0.403        | 2.693665e-09 | 24 |
| PSMB2        | GC IgA         |       |              |              |    |
| 1.704856e-13 | 0.4032601      | 0.409 | 0.213        | 3.039587e-09 | 24 |
| PHAX         | GC IgA         |       |              |              |    |
| 1.80552e-13  | 0.3613224      | 0.728 | 0.467        | 3.219062e-09 | 24 |
| MTDH         | GC IgA         |       |              |              |    |
| 1.906437e-13 | 0.3716949      | 0.879 | 0.682        | 3.398987e-09 | 24 |
| SLC25A3      | GC IgA         |       |              |              |    |
| 2.066092e-13 | 0.4087031      | 0.455 | 0.238        | 3.683636e-09 | 24 |
| PTRHD1       | GC IgA         |       |              |              |    |

|              |           |      |       |              |              |
|--------------|-----------|------|-------|--------------|--------------|
| 2.168673e-13 | 0.488909  | 0.48 | 0.257 | 3.866526e-09 | 24           |
| CNN2         | GC IgA    |      |       |              |              |
| 2.242947e-13 | 0.3696734 |      | 0.786 | 0.555        | 3.998951e-09 |
| PGK1         | GC IgA    |      |       |              | 24           |
| 2.278509e-13 | 0.4534552 |      | 0.443 | 0.215        | 4.062353e-09 |
| IFI27L2      | GC IgA    |      |       |              | 24           |
| 2.382901e-13 | 0.4291045 |      | 0.539 | 0.314        | 4.248474e-09 |
| WDR1         | GC IgA    |      |       |              | 24           |
| 2.721604e-13 | 0.5003492 |      | 0.288 | 0.13         | 4.852347e-09 |
| PHGDH        | GC IgA    |      |       |              | 24           |
| 3.03678e-13  | 0.3246816 |      | 0.139 | 0.042        | 5.414275e-09 |
| IGF2BP3      | GC IgA    |      |       |              | 24           |
| 3.353631e-13 | 0.4672767 |      | 0.539 | 0.317        | 5.979188e-09 |
| FCRLA        | GC IgA    |      |       |              | 24           |
| 3.49524e-13  | 0.4254509 |      | 0.545 | 0.311        | 6.231664e-09 |
| LPXN         | GC IgA    |      |       |              | 24           |
| 3.568948e-13 | 0.4178791 |      | 0.22  | 0.089        | 6.363078e-09 |
| ZBTB38       | GC IgA    |      |       |              | 24           |
| 3.69232e-13  | 0.3709679 |      | 0.759 | 0.544        | 6.583038e-09 |
| UBE2D2       | GC IgA    |      |       |              | 24           |
| 3.710853e-13 | 0.4206661 |      | 0.601 | 0.395        | 6.61608e-09  |
| CSTB         | GC IgA    |      |       |              | 24           |
| 4.005699e-13 | 0.4575306 |      | 0.489 | 0.277        | 7.14176e-09  |
| CNIH1        | GC IgA    |      |       |              | 24           |
| 4.426314e-13 | 0.3484048 |      | 0.728 | 0.483        | 7.891675e-09 |
| NDUFB1       | GC IgA    |      |       |              | 24           |
| 4.44327e-13  | 0.4013487 |      | 0.269 | 0.103        | 7.921906e-09 |
| RHBDF2       | GC IgA    |      |       |              | 24           |
| 4.651281e-13 | 0.3918396 |      | 0.644 | 0.416        | 8.292769e-09 |
| COX7A2L      | GC IgA    |      |       |              | 24           |
| 4.916635e-13 | 0.4788964 |      | 0.406 | 0.221        | 8.765868e-09 |
| RPIA         | GC IgA    |      |       |              | 24           |
| 4.919866e-13 | -0.354902 |      | 0.994 | 0.992        | 8.77163e-09  |
| RPL37        | GC IgA    |      |       |              | 24           |
| 4.932203e-13 | 0.3172918 |      | 0.858 | 0.651        | 8.793625e-09 |
| UBE2D3       | GC IgA    |      |       |              | 24           |
| 5.064696e-13 | 0.3847949 |      | 0.56  | 0.331        | 9.029847e-09 |
| EIF3A        | GC IgA    |      |       |              | 24           |
| 5.210489e-13 | 0.3101696 |      | 0.115 | 0.029        | 9.28978e-09  |
| ZFAND4       | GC IgA    |      |       |              | 24           |
| 5.659035e-13 | 0.3429343 |      | 0.777 | 0.553        | 1.008949e-08 |
| NEDD8        | GC IgA    |      |       |              | 24           |
| 6.119549e-13 | 0.4255021 |      | 0.356 | 0.163        | 1.091054e-08 |
| PPP1R18      | GC IgA    |      |       |              | 24           |
| 6.284688e-13 | 0.3774297 |      | 0.604 | 0.38         | 1.120497e-08 |
| LSM8         | GC IgA    |      |       |              | 24           |
| 6.588111e-13 | 0.3555548 |      | 0.161 | 0.049        | 1.174594e-08 |
| GNA13        | GC IgA    |      |       |              | 24           |
| 7.274563e-13 | 0.4237059 |      | 0.297 | 0.128        | 1.296982e-08 |
| DNAJB2       | GC IgA    |      |       |              | 24           |

|              |                |       |              |              |    |
|--------------|----------------|-------|--------------|--------------|----|
| 7.537556e-13 | 0.3729122      | 0.421 | 0.205        | 1.343871e-08 | 24 |
| ARHGEF1      | GC IgA         |       |              |              |    |
| 8.286961e-13 | 0.3018303      | 0.118 | 0.027        | 1.477482e-08 | 24 |
| B3GLCT       | GC IgA         |       |              |              |    |
| 9.260956e-13 | 0.388382 0.644 | 0.428 | 1.651136e-08 | 24           |    |
| KTN1         | GC IgA         |       |              |              |    |
| 9.357764e-13 | 0.3304495      | 0.851 | 0.655        | 1.668396e-08 | 24 |
| PSMB1        | GC IgA         |       |              |              |    |
| 9.955987e-13 | -0.4993255     | 0.015 | 0.113        | 1.775053e-08 | 24 |
| P2RY10       | GC IgA         |       |              |              |    |
| 1.082041e-12 | 0.3765582      | 0.622 | 0.39         | 1.929172e-08 | 24 |
| SH3BGRL      | GC IgA         |       |              |              |    |
| 1.09661e-12  | 0.4075758      | 0.378 | 0.178        | 1.955145e-08 | 24 |
| TMC6         | GC IgA         |       |              |              |    |
| 1.114347e-12 | 0.3110266      | 0.149 | 0.038        | 1.98677e-08  | 24 |
| INPP5B       | GC IgA         |       |              |              |    |
| 1.204691e-12 | 0.4104776      | 0.461 | 0.238        | 2.147844e-08 | 24 |
| SP140        | GC IgA         |       |              |              |    |
| 1.332784e-12 | 0.5229396      | 0.356 | 0.131        | 2.37622e-08  | 24 |
| SULF2        | GC IgA         |       |              |              |    |
| 1.35301e-12  | 0.4188106      | 0.362 | 0.183        | 2.412281e-08 | 24 |
| HSD17B12     | GC IgA         |       |              |              |    |
| 1.441009e-12 | 0.3325482      | 0.721 | 0.491        | 2.569175e-08 | 24 |
| THRAP3       | GC IgA         |       |              |              |    |
| 1.441492e-12 | -0.4557914     | 0.019 | 0.109        | 2.570036e-08 | 24 |
| SNX9         | GC IgA         |       |              |              |    |
| 1.452077e-12 | -0.7416965     | 0.09  | 0.198        | 2.588907e-08 | 24 |
| ACP5         | GC IgA         |       |              |              |    |
| 1.479143e-12 | 0.3743288      | 0.793 | 0.582        | 2.637164e-08 | 24 |
| NDUFB2       | GC IgA         |       |              |              |    |
| 1.520409e-12 | 0.4135831      | 0.375 | 0.18         | 2.710738e-08 | 24 |
| TADA3        | GC IgA         |       |              |              |    |
| 1.598009e-12 | 0.3803202      | 0.282 | 0.111        | 2.849091e-08 | 24 |
| HPS1         | GC IgA         |       |              |              |    |
| 1.728616e-12 | 0.4044774      | 0.461 | 0.251        | 3.081949e-08 | 24 |
| RGS10        | GC IgA         |       |              |              |    |
| 1.742717e-12 | 0.360215 0.251 | 0.093 | 3.10709e-08  | 24           |    |
| PDLIM2       | GC IgA         |       |              |              |    |
| 1.80269e-12  | 0.3572517      | 0.211 | 0.074        | 3.214017e-08 | 24 |
| HS2ST1       | GC IgA         |       |              |              |    |
| 1.80273e-12  | 0.3716786      | 0.731 | 0.496        | 3.214087e-08 | 24 |
| COX5A        | GC IgA         |       |              |              |    |
| 1.986519e-12 | 0.4136992      | 0.418 | 0.225        | 3.541764e-08 | 24 |
| PLEKHJ1      | GC IgA         |       |              |              |    |
| 2.054544e-12 | -0.6587754     | 0.062 | 0.184        | 3.663047e-08 | 24 |
| PLPP5        | GC IgA         |       |              |              |    |
| 2.055286e-12 | 0.3745988      | 0.557 | 0.322        | 3.664369e-08 | 24 |
| BLNK         | GC IgA         |       |              |              |    |
| 2.060018e-12 | 0.3514305      | 0.697 | 0.467        | 3.672805e-08 | 24 |
| PRDX5        | GC IgA         |       |              |              |    |

|              |                |       |       |              |    |
|--------------|----------------|-------|-------|--------------|----|
| 2.12193e-12  | 0.3700336      | 0.557 | 0.325 | 3.783188e-08 | 24 |
| PMAIP1       | GC IgA         |       |       |              |    |
| 2.238965e-12 | 0.4130797      | 0.706 | 0.5   | 3.99185e-08  | 24 |
| RTRAF        | GC IgA         |       |       |              |    |
| 2.367156e-12 | 0.3792174      | 0.542 | 0.314 | 4.220403e-08 | 24 |
| SFT2D1       | GC IgA         |       |       |              |    |
| 2.429569e-12 | -0.569986      | 0.059 | 0.172 | 4.331678e-08 | 24 |
| BCL2         | GC IgA         |       |       |              |    |
| 2.719235e-12 | 0.4238951      | 0.412 | 0.227 | 4.848123e-08 | 24 |
| NGLY1        | GC IgA         |       |       |              |    |
| 3.117104e-12 | 0.3692786      | 0.186 | 0.067 | 5.557485e-08 | 24 |
| ST20         | GC IgA         |       |       |              |    |
| 3.291077e-12 | -0.6712772     | 0.195 | 0.33  | 5.867662e-08 | 24 |
| SMC6         | GC IgA         |       |       |              |    |
| 3.515343e-12 | 0.4069454      | 0.316 | 0.146 | 6.267504e-08 | 24 |
| ZNF580       | GC IgA         |       |       |              |    |
| 3.585685e-12 | 0.3721787      | 0.359 | 0.174 | 6.392917e-08 | 24 |
| PDIA4        | GC IgA         |       |       |              |    |
| 3.814941e-12 | -0.3547183     | 0.988 | 0.992 | 6.801659e-08 | 24 |
| RPL36        | GC IgA         |       |       |              |    |
| 3.884898e-12 | 0.3189 0.721   | 0.489 |       | 6.926385e-08 | 24 |
| SF3B6        | GC IgA         |       |       |              |    |
| 4.458833e-12 | 0.339179 0.214 | 0.082 |       | 7.949654e-08 | 24 |
| TFPT         | GC IgA         |       |       |              |    |
| 4.706859e-12 | 0.4240471      | 0.536 | 0.301 | 8.391859e-08 | 24 |
| ODC1         | GC IgA         |       |       |              |    |
| 4.920553e-12 | 0.4734291      | 0.526 | 0.317 | 8.772854e-08 | 24 |
| PRDX2        | GC IgA         |       |       |              |    |
| 5.089175e-12 | 0.3491159      | 0.26  | 0.109 | 9.07349e-08  | 24 |
| PTS          | GC IgA         |       |       |              |    |
| 5.105674e-12 | -0.6712638     | 0.074 | 0.199 | 9.102907e-08 | 24 |
| YBX3         | GC IgA         |       |       |              |    |
| 6.305963e-12 | 0.3587084      | 0.607 | 0.381 | 1.12429e-07  | 24 |
| JAK1         | GC IgA         |       |       |              |    |
| 6.327431e-12 | 0.3844704      | 0.529 | 0.296 | 1.128118e-07 | 24 |
| BLK          | GC IgA         |       |       |              |    |
| 6.458643e-12 | 0.335689 0.142 | 0.047 |       | 1.151511e-07 | 24 |
| LRRK1        | GC IgA         |       |       |              |    |
| 6.577827e-12 | 0.3663885      | 0.502 | 0.295 | 1.172761e-07 | 24 |
| PDHB         | GC IgA         |       |       |              |    |
| 6.651404e-12 | 0.3714842      | 0.402 | 0.207 | 1.185879e-07 | 24 |
| GLRX         | GC IgA         |       |       |              |    |
| 6.692857e-12 | 0.3846853      | 0.328 | 0.147 | 1.19327e-07  | 24 |
| SMARCA4      | GC IgA         |       |       |              |    |
| 7.067694e-12 | 0.4063569      | 0.594 | 0.396 | 1.260099e-07 | 24 |
| ORAI2        | GC IgA         |       |       |              |    |
| 8.335297e-12 | -0.7131226     | 0.115 | 0.243 | 1.4861e-07   | 24 |
| PHACTR1      | GC IgA         |       |       |              |    |
| 8.780746e-12 | 0.4169167      | 0.474 | 0.279 | 1.565519e-07 | 24 |
| BABAM1       | GC IgA         |       |       |              |    |

|              |                |       |       |              |    |
|--------------|----------------|-------|-------|--------------|----|
| 1.05947e-11  | 0.3810008      | 0.536 | 0.308 | 1.888929e-07 | 24 |
| CALM3        | GC IgA         |       |       |              |    |
| 1.181172e-11 | 0.3599186      | 0.867 | 0.715 | 2.105911e-07 | 24 |
| COX6B1       | GC IgA         |       |       |              |    |
| 1.271261e-11 | 0.3558989      | 0.437 | 0.226 | 2.266531e-07 | 24 |
| NSMCE1       | GC IgA         |       |       |              |    |
| 1.274911e-11 | -0.6963868     | 0.368 | 0.479 | 2.273039e-07 | 24 |
| SQSTM1       | GC IgA         |       |       |              |    |
| 1.32922e-11  | 0.3223008      | 0.173 | 0.062 | 2.369866e-07 | 24 |
| SNX22        | GC IgA         |       |       |              |    |
| 1.407063e-11 | 0.3673041      | 0.539 | 0.32  | 2.508653e-07 | 24 |
| GNB2         | GC IgA         |       |       |              |    |
| 1.412682e-11 | 0.3621 0.322   | 0.139 |       | 2.518671e-07 | 24 |
| ITGB1        | GC IgA         |       |       |              |    |
| 1.435319e-11 | 0.360274 0.232 | 0.094 |       | 2.55903e-07  | 24 |
| UBR5         | GC IgA         |       |       |              |    |
| 1.441143e-11 | 0.4047434      | 0.601 | 0.374 | 2.569414e-07 | 24 |
| FAM107B      | GC IgA         |       |       |              |    |
| 1.446109e-11 | 0.3395308      | 0.294 | 0.126 | 2.578268e-07 | 24 |
| STAP1        | GC IgA         |       |       |              |    |
| 1.479257e-11 | 0.4173546      | 0.567 | 0.356 | 2.637368e-07 | 24 |
| GNAS         | GC IgA         |       |       |              |    |
| 1.502349e-11 | 0.3047777      | 0.149 | 0.046 | 2.678538e-07 | 24 |
| CCDC102A     | GC IgA         |       |       |              |    |
| 1.536636e-11 | -0.7129227     | 0.189 | 0.306 | 2.739668e-07 | 24 |
| ARHGAP24     | GC IgA         |       |       |              |    |
| 1.605443e-11 | 0.3531972      | 0.511 | 0.302 | 2.862345e-07 | 24 |
| UGP2         | GC IgA         |       |       |              |    |
| 1.614043e-11 | 0.3788801      | 0.495 | 0.284 | 2.877678e-07 | 24 |
| GSTK1        | GC IgA         |       |       |              |    |
| 1.692141e-11 | 0.3433384      | 0.632 | 0.421 | 3.016918e-07 | 24 |
| ECH1         | GC IgA         |       |       |              |    |
| 1.779563e-11 | 0.3479444      | 0.74  | 0.518 | 3.172784e-07 | 24 |
| PSMB6        | GC IgA         |       |       |              |    |
| 1.868352e-11 | 0.3922228      | 0.276 | 0.135 | 3.331085e-07 | 24 |
| GTF2E2       | GC IgA         |       |       |              |    |
| 1.887514e-11 | 0.3728192      | 0.313 | 0.15  | 3.365248e-07 | 24 |
| ARPC1A       | GC IgA         |       |       |              |    |
| 1.956807e-11 | 0.3992496      | 0.539 | 0.343 | 3.488792e-07 | 24 |
| SNX17        | GC IgA         |       |       |              |    |
| 1.982603e-11 | 0.3825721      | 0.474 | 0.265 | 3.534783e-07 | 24 |
| PPP1R7       | GC IgA         |       |       |              |    |
| 2.15423e-11  | 0.3445109      | 0.214 | 0.08  | 3.840777e-07 | 24 |
| RANBP2       | GC IgA         |       |       |              |    |
| 2.181161e-11 | 0.4012794      | 0.368 | 0.175 | 3.888792e-07 | 24 |
| RGS19        | GC IgA         |       |       |              |    |
| 2.194073e-11 | 0.3655207      | 0.362 | 0.181 | 3.911814e-07 | 24 |
| TRABD        | GC IgA         |       |       |              |    |
| 2.222522e-11 | 0.3381479      | 0.316 | 0.133 | 3.962535e-07 | 24 |
| PLEKHA2      | GC IgA         |       |       |              |    |



|              |            |       |       |              |    |
|--------------|------------|-------|-------|--------------|----|
| 2.233648e-11 | 0.3420301  | 0.585 | 0.365 | 3.982371e-07 | 24 |
| EWSR1        | GC IgA     |       |       |              |    |
| 2.302847e-11 | 0.3798724  | 0.294 | 0.136 | 4.105747e-07 | 24 |
| CLIC4        | GC IgA     |       |       |              |    |
| 2.347662e-11 | 0.4261735  | 0.406 | 0.227 | 4.185647e-07 | 24 |
| IAH1         | GC IgA     |       |       |              |    |
| 2.396902e-11 | 0.3766306  | 0.384 | 0.207 | 4.273437e-07 | 24 |
| TCEAL8       | GC IgA     |       |       |              |    |
| 2.668947e-11 | -0.7375581 | 0.241 | 0.354 | 4.758466e-07 | 24 |
| TUBB4B       | GC IgA     |       |       |              |    |
| 2.712773e-11 | 0.3762347  | 0.232 | 0.1   | 4.836604e-07 | 24 |
| PTPN7        | GC IgA     |       |       |              |    |
| 2.752669e-11 | 0.3727652  | 0.567 | 0.362 | 4.907734e-07 | 24 |
| PPP2CA       | GC IgA     |       |       |              |    |
| 2.911669e-11 | 0.4147244  | 0.402 | 0.214 | 5.191215e-07 | 24 |
| DMAC1        | GC IgA     |       |       |              |    |
| 2.966924e-11 | 0.4724876  | 0.449 | 0.256 | 5.289729e-07 | 24 |
| MDM4         | GC IgA     |       |       |              |    |
| 3.738953e-11 | 0.3794867  | 0.539 | 0.332 | 6.66618e-07  | 24 |
| BAX          | GC IgA     |       |       |              |    |
| 3.873412e-11 | 0.3579623  | 0.217 | 0.09  | 6.905907e-07 | 24 |
| RITA1        | GC IgA     |       |       |              |    |
| 4.173703e-11 | 0.3757246  | 0.402 | 0.22  | 7.441295e-07 | 24 |
| MPLKIP       | GC IgA     |       |       |              |    |
| 4.248065e-11 | 0.3622014  | 0.356 | 0.177 | 7.573874e-07 | 24 |
| MTERF4       | GC IgA     |       |       |              |    |
| 4.388128e-11 | 0.3672791  | 0.368 | 0.19  | 7.823594e-07 | 24 |
| NDUFA8       | GC IgA     |       |       |              |    |
| 5.055038e-11 | 0.372871   | 0.526 | 0.319 | 9.012627e-07 | 24 |
| IGBP1        | GC IgA     |       |       |              |    |
| 5.715463e-11 | -0.6124915 | 0.207 | 0.346 | 1.01901e-06  | 24 |
| CAST         | GC IgA     |       |       |              |    |
| 5.826275e-11 | 0.3874375  | 0.43  | 0.25  | 1.038767e-06 | 24 |
| MCTS1        | GC IgA     |       |       |              |    |
| 6.617173e-11 | -0.5257115 | 0.05  | 0.15  | 1.179776e-06 | 24 |
| CELF2        | GC IgA     |       |       |              |    |
| 6.692804e-11 | 0.4116285  | 0.57  | 0.362 | 1.19326e-06  | 24 |
| CPNE1        | GC IgA     |       |       |              |    |
| 6.939563e-11 | 0.3855008  | 0.604 | 0.404 | 1.237255e-06 | 24 |
| SMIM14       | GC IgA     |       |       |              |    |
| 7.134376e-11 | 0.3478582  | 0.421 | 0.227 | 1.271988e-06 | 24 |
| DEGS1        | GC IgA     |       |       |              |    |
| 7.231675e-11 | 0.3386458  | 0.709 | 0.516 | 1.289335e-06 | 24 |
| ATP5PB       | GC IgA     |       |       |              |    |
| 7.59885e-11  | 0.3959808  | 0.313 | 0.151 | 1.354799e-06 | 24 |
| PEA15        | GC IgA     |       |       |              |    |
| 7.696645e-11 | -0.4098251 | 0.923 | 0.934 | 1.372235e-06 | 24 |
| MT-ATP6      | GC IgA     |       |       |              |    |
| 8.390524e-11 | 0.3557225  | 0.297 | 0.141 | 1.495947e-06 | 24 |
| FAM207A      | GC IgA     |       |       |              |    |

|              |            |       |       |              |    |
|--------------|------------|-------|-------|--------------|----|
| 9.10538e-11  | 0.3630299  | 0.251 | 0.114 | 1.623398e-06 | 24 |
| HIBCH        | GC IgA     |       |       |              |    |
| 9.539691e-11 | 0.3722202  | 0.294 | 0.14  | 1.700832e-06 | 24 |
| CISD1        | GC IgA     |       |       |              |    |
| 1.02072e-10  | -0.588128  | 0.09  | 0.197 | 1.819842e-06 | 24 |
| CHPT1        | GC IgA     |       |       |              |    |
| 1.025034e-10 | 0.3500243  | 0.288 | 0.136 | 1.827532e-06 | 24 |
| OSBPL9       | GC IgA     |       |       |              |    |
| 1.064372e-10 | 0.353402   | 0.297 | 0.125 | 1.89767e-06  | 24 |
| ZBTB20       | GC IgA     |       |       |              |    |
| 1.107482e-10 | 0.3275334  | 0.567 | 0.353 | 1.974529e-06 | 24 |
| DGUOK        | GC IgA     |       |       |              |    |
| 1.123401e-10 | 0.3907121  | 0.146 | 0.048 | 2.002911e-06 | 24 |
| HES6         | GC IgA     |       |       |              |    |
| 1.140866e-10 | 0.3271656  | 0.827 | 0.696 | 2.03405e-06  | 24 |
| HLA-DQB1     | GC IgA     |       |       |              |    |
| 1.143407e-10 | 0.3436347  | 0.61  | 0.409 | 2.038581e-06 | 24 |
| EID1         | GC IgA     |       |       |              |    |
| 1.15377e-10  | 0.33884    | 0.344 | 0.167 | 2.057056e-06 | 24 |
| TFDP1        | GC IgA     |       |       |              |    |
| 1.188586e-10 | 0.3132977  | 0.56  | 0.344 | 2.11913e-06  | 24 |
| POLR2J       | GC IgA     |       |       |              |    |
| 1.209467e-10 | 0.3799248  | 0.786 | 0.609 | 2.156359e-06 | 24 |
| SYNGR2       | GC IgA     |       |       |              |    |
| 1.222248e-10 | 0.3379767  | 0.285 | 0.13  | 2.179147e-06 | 24 |
| C16orf87     | GC IgA     |       |       |              |    |
| 1.254557e-10 | -0.7242731 | 0.124 | 0.269 | 2.23675e-06  | 24 |
| JUN          | GC IgA     |       |       |              |    |
| 1.265868e-10 | 0.3028652  | 0.282 | 0.129 | 2.256916e-06 | 24 |
| STIM2        | GC IgA     |       |       |              |    |
| 1.280749e-10 | 0.3066099  | 0.693 | 0.47  | 2.283448e-06 | 24 |
| GPSM3        | GC IgA     |       |       |              |    |
| 1.416467e-10 | -0.6636426 | 0.328 | 0.445 | 2.525418e-06 | 24 |
| ANXA2        | GC IgA     |       |       |              |    |
| 1.634988e-10 | 0.3305849  | 0.269 | 0.13  | 2.915021e-06 | 24 |
| MAGEF1       | GC IgA     |       |       |              |    |
| 1.690392e-10 | 0.3151274  | 0.514 | 0.309 | 3.0138e-06   | 24 |
| SCP2         | GC IgA     |       |       |              |    |
| 1.757459e-10 | 0.316721   | 0.387 | 0.208 | 3.133373e-06 | 24 |
| EHD1         | GC IgA     |       |       |              |    |
| 1.76893e-10  | 0.3899978  | 0.412 | 0.22  | 3.153826e-06 | 24 |
| SKAP2        | GC IgA     |       |       |              |    |
| 1.835546e-10 | 0.3724155  | 0.269 | 0.132 | 3.272596e-06 | 24 |
| PRKCD        | GC IgA     |       |       |              |    |
| 2.028671e-10 | 0.3386734  | 0.489 | 0.286 | 3.616918e-06 | 24 |
| NDUFB5       | GC IgA     |       |       |              |    |
| 2.042232e-10 | 0.3232554  | 0.56  | 0.343 | 3.641095e-06 | 24 |
| MRPS34       | GC IgA     |       |       |              |    |
| 2.10425e-10  | 0.3094911  | 0.811 | 0.612 | 3.751667e-06 | 24 |
| COX5B        | GC IgA     |       |       |              |    |

|              |                |       |              |              |    |
|--------------|----------------|-------|--------------|--------------|----|
| 2.105761e-10 | -0.4609837     | 0.022 | 0.105        | 3.754361e-06 | 24 |
| MTSS1        | GC IgA         |       |              |              |    |
| 2.157727e-10 | 0.3232877      | 0.539 | 0.323        | 3.847012e-06 | 24 |
| SPAG7        | GC IgA         |       |              |              |    |
| 2.175698e-10 | -0.670194      | 0.118 | 0.239        | 3.879052e-06 | 24 |
| CD55         | GC IgA         |       |              |              |    |
| 2.297521e-10 | 0.3677228      | 0.56  | 0.376        | 4.09625e-06  | 24 |
| SUPT4H1      | GC IgA         |       |              |              |    |
| 2.40577e-10  | 0.3127088      | 0.214 | 0.091        | 4.289247e-06 | 24 |
| XPNPEP1      | GC IgA         |       |              |              |    |
| 2.520922e-10 | 0.3287394      | 0.235 | 0.098        | 4.494552e-06 | 24 |
| TACC1        | GC IgA         |       |              |              |    |
| 2.59244e-10  | 0.3816263      | 0.365 | 0.195        | 4.622061e-06 | 24 |
| UBE2E1       | GC IgA         |       |              |              |    |
| 2.872359e-10 | 0.3346522      | 0.489 | 0.288        | 5.121128e-06 | 24 |
| TUBA4A       | GC IgA         |       |              |              |    |
| 3.023748e-10 | -0.4884338     | 0.053 | 0.149        | 5.39104e-06  | 24 |
| SVIP         | GC IgA         |       |              |              |    |
| 3.109707e-10 | 0.331854 0.204 | 0.091 | 5.544297e-06 | 24           |    |
| MSH6         | GC IgA         |       |              |              |    |
| 3.151776e-10 | 0.352104 0.387 | 0.2   | 5.619301e-06 | 24           |    |
| LAGE3        | GC IgA         |       |              |              |    |
| 3.403877e-10 | 0.4033259      | 0.303 | 0.165        | 6.068772e-06 | 24 |
| COX11        | GC IgA         |       |              |              |    |
| 3.594345e-10 | 0.3445629      | 0.328 | 0.155        | 6.408357e-06 | 24 |
| ACAP2        | GC IgA         |       |              |              |    |
| 3.610975e-10 | 0.3450009      | 0.399 | 0.215        | 6.438007e-06 | 24 |
| SMAP2        | GC IgA         |       |              |              |    |
| 3.643049e-10 | 0.339625 0.272 | 0.122 | 6.495193e-06 | 24           |    |
| PLEK         | GC IgA         |       |              |              |    |
| 3.892149e-10 | 0.3113156      | 0.7   | 0.487        | 6.939313e-06 | 24 |
| EIF3M        | GC IgA         |       |              |              |    |
| 3.905237e-10 | 0.3222933      | 0.319 | 0.159        | 6.962648e-06 | 24 |
| TPGS2        | GC IgA         |       |              |              |    |
| 4.529288e-10 | 0.360622 0.495 | 0.295 | 8.075267e-06 | 24           |    |
| TWF2         | GC IgA         |       |              |              |    |
| 4.612896e-10 | 0.3319414      | 0.22  | 0.09         | 8.224333e-06 | 24 |
| PPP6R1       | GC IgA         |       |              |              |    |
| 4.709419e-10 | -0.7952193     | 0.322 | 0.409        | 8.396424e-06 | 24 |
| TXN          | GC IgA         |       |              |              |    |
| 4.919261e-10 | -0.5468659     | 0.084 | 0.191        | 8.770551e-06 | 24 |
| S1PR4        | GC IgA         |       |              |              |    |
| 6.039286e-10 | -0.7354691     | 0.35  | 0.448        | 1.076744e-05 | 24 |
| PNRC1        | GC IgA         |       |              |              |    |
| 6.149605e-10 | 0.3179151      | 0.458 | 0.256        | 1.096413e-05 | 24 |
| UPF3A        | GC IgA         |       |              |              |    |
| 6.866683e-10 | 0.3509095      | 0.226 | 0.098        | 1.224261e-05 | 24 |
| EPS15L1      | GC IgA         |       |              |              |    |
| 7.111925e-10 | 0.345761 0.563 | 0.359 | 1.267985e-05 | 24           |    |
| SDHC         | GC IgA         |       |              |              |    |

|              |               |       |              |              |    |
|--------------|---------------|-------|--------------|--------------|----|
| 7.541614e-10 | 0.3076977     | 0.638 | 0.424        | 1.344594e-05 | 24 |
| TAF7         | GC IgA        |       |              |              |    |
| 7.990833e-10 | 0.3315206     | 0.43  | 0.245        | 1.424686e-05 | 24 |
| NBDY         | GC IgA        |       |              |              |    |
| 8.010254e-10 | 0.3437779     | 0.467 | 0.276        | 1.428148e-05 | 24 |
| CCNG1        | GC IgA        |       |              |              |    |
| 8.120168e-10 | 0.358148 0.18 | 0.08  | 1.447745e-05 | 24           |    |
| CLPTM1L      | GC IgA        |       |              |              |    |
| 8.648761e-10 | 0.3757936     | 0.226 | 0.108        | 1.541988e-05 | 24 |
| DAP          | GC IgA        |       |              |              |    |
| 9.049482e-10 | 0.4164009     | 0.467 | 0.288        | 1.613432e-05 | 24 |
| C7orf50      | GC IgA        |       |              |              |    |
| 9.345867e-10 | 0.3242894     | 0.319 | 0.16         | 1.666275e-05 | 24 |
| RSU1         | GC IgA        |       |              |              |    |
| 9.52673e-10  | 0.4113087     | 0.402 | 0.233        | 1.698521e-05 | 24 |
| CPNE3        | GC IgA        |       |              |              |    |
| 9.851726e-10 | 0.3427043     | 0.167 | 0.059        | 1.756464e-05 | 24 |
| ZNF101       | GC IgA        |       |              |              |    |
| 1.019792e-09 | 0.3658442     | 0.35  | 0.188        | 1.818187e-05 | 24 |
| NUDT21       | GC IgA        |       |              |              |    |
| 1.036797e-09 | 0.3492401     | 0.427 | 0.255        | 1.848506e-05 | 24 |
| AC02         | GC IgA        |       |              |              |    |
| 1.052084e-09 | -0.5475581    | 0.121 | 0.242        | 1.87576e-05  | 24 |
| HLA-F        | GC IgA        |       |              |              |    |
| 1.123546e-09 | 0.3322466     | 0.257 | 0.12         | 2.00317e-05  | 24 |
| TFEB         | GC IgA        |       |              |              |    |
| 1.224942e-09 | 0.3357006     | 0.452 | 0.273        | 2.183949e-05 | 24 |
| RNF7         | GC IgA        |       |              |              |    |
| 1.267162e-09 | 0.3466197     | 0.706 | 0.506        | 2.259222e-05 | 24 |
| MZT2B        | GC IgA        |       |              |              |    |
| 1.307897e-09 | 0.3671042     | 0.458 | 0.273        | 2.331849e-05 | 24 |
| SEPT2        | GC IgA        |       |              |              |    |
| 1.396339e-09 | 0.3337252     | 0.325 | 0.165        | 2.489533e-05 | 24 |
| DOCK8        | GC IgA        |       |              |              |    |
| 1.423128e-09 | 0.3906047     | 0.337 | 0.186        | 2.537295e-05 | 24 |
| SNRPA        | GC IgA        |       |              |              |    |
| 1.427202e-09 | -0.4747356    | 0.102 | 0.202        | 2.544559e-05 | 24 |
| NPM3         | GC IgA        |       |              |              |    |
| 1.478808e-09 | 0.3003109     | 0.266 | 0.115        | 2.636566e-05 | 24 |
| LMNB1        | GC IgA        |       |              |              |    |
| 1.512949e-09 | 0.3300343     | 0.226 | 0.103        | 2.697436e-05 | 24 |
| SLC25A4      | GC IgA        |       |              |              |    |
| 1.535035e-09 | 0.3570905     | 0.375 | 0.204        | 2.736814e-05 | 24 |
| ARL2BP       | GC IgA        |       |              |              |    |
| 1.54528e-09  | 0.3048725     | 0.347 | 0.176        | 2.75508e-05  | 24 |
| RRAGA        | GC IgA        |       |              |              |    |
| 1.553791e-09 | 0.3100935     | 0.619 | 0.4          | 2.770254e-05 | 24 |
| UQCRCF1      | GC IgA        |       |              |              |    |
| 1.71879e-09  | -0.4662991    | 0.115 | 0.226        | 3.064431e-05 | 24 |
| TMEM109      | GC IgA        |       |              |              |    |

|              |            |       |       |              |              |
|--------------|------------|-------|-------|--------------|--------------|
| 1.878893e-09 | 0.308973   | 0.201 | 0.082 | 3.349877e-05 | 24           |
| GSTZ1        | GC IgA     |       |       |              |              |
| 1.929387e-09 | 0.3171595  |       | 0.69  | 0.493        | 3.439904e-05 |
| ARL6IP4      | GC IgA     |       |       |              | 24           |
| 1.945977e-09 | -0.315126  |       | 0.981 | 0.981        | 3.469483e-05 |
| RPL5         | GC IgA     |       |       |              | 24           |
| 1.986964e-09 | 0.3217488  |       | 0.56  | 0.358        | 3.542558e-05 |
| H2AFV        | GC IgA     |       |       |              | 24           |
| 2.019193e-09 | 0.3157416  |       | 0.223 | 0.099        | 3.600019e-05 |
| RMDN1        | GC IgA     |       |       |              | 24           |
| 2.088385e-09 | 0.3415058  |       | 0.576 | 0.378        | 3.723381e-05 |
| POLR2G       | GC IgA     |       |       |              | 24           |
| 2.106912e-09 | 0.3289081  |       | 0.223 | 0.094        | 3.756414e-05 |
| STK40        | GC IgA     |       |       |              | 24           |
| 2.132614e-09 | -0.3467736 |       | 0.981 | 0.981        | 3.802238e-05 |
| RPSA         | GC IgA     |       |       |              | 24           |
| 2.202866e-09 | 0.3484825  |       | 0.322 | 0.171        | 3.927489e-05 |
| CLTB         | GC IgA     |       |       |              | 24           |
| 2.519311e-09 | 0.330746   | 0.421 | 0.253 | 4.49168e-05  | 24           |
| ZCCHC10      | GC IgA     |       |       |              |              |
| 3.065268e-09 | -0.5669279 |       | 0.616 | 0.677        | 5.465066e-05 |
| TAGLN2       | GC IgA     |       |       |              | 24           |
| 3.263831e-09 | 0.3490187  |       | 0.291 | 0.139        | 5.819084e-05 |
| COR01B       | GC IgA     |       |       |              | 24           |
| 3.270192e-09 | -0.5934742 |       | 0.198 | 0.298        | 5.830425e-05 |
| PDLIM1       | GC IgA     |       |       |              | 24           |
| 3.383921e-09 | -0.6067836 |       | 0.313 | 0.414        | 6.033193e-05 |
| NPC2         | GC IgA     |       |       |              | 24           |
| 3.388514e-09 | 0.3051069  |       | 0.167 | 0.055        | 6.041381e-05 |
| TUBB2A       | GC IgA     |       |       |              | 24           |
| 3.516687e-09 | 0.3103792  |       | 0.303 | 0.153        | 6.269901e-05 |
| ATP6V1H      | GC IgA     |       |       |              | 24           |
| 3.545546e-09 | 0.3292173  |       | 0.186 | 0.073        | 6.321355e-05 |
| DOCK2        | GC IgA     |       |       |              | 24           |
| 3.777959e-09 | 0.3579342  |       | 0.396 | 0.227        | 6.735723e-05 |
| GTF2I        | GC IgA     |       |       |              | 24           |
| 3.785987e-09 | -0.5495774 |       | 0.223 | 0.349        | 6.750036e-05 |
| LITAF        | GC IgA     |       |       |              | 24           |
| 3.852259e-09 | 0.3638424  |       | 0.446 | 0.269        | 6.868192e-05 |
| TOP1         | GC IgA     |       |       |              | 24           |
| 3.91997e-09  | 0.3613531  |       | 0.502 | 0.322        | 6.988914e-05 |
| MLF2         | GC IgA     |       |       |              | 24           |
| 4.145434e-09 | -0.6569914 |       | 0.582 | 0.648        | 7.390894e-05 |
| ZFP36L1      | GC IgA     |       |       |              | 24           |
| 4.168517e-09 | 0.3613381  |       | 0.418 | 0.242        | 7.432048e-05 |
| GTF2H5       | GC IgA     |       |       |              | 24           |
| 4.201106e-09 | 0.3195066  |       | 0.474 | 0.281        | 7.490153e-05 |
| GGNBP2       | GC IgA     |       |       |              | 24           |
| 4.236633e-09 | 0.3578809  |       | 0.226 | 0.113        | 7.553493e-05 |
| PAX5         | GC IgA     |       |       |              | 24           |

|              |            |       |       |              |    |
|--------------|------------|-------|-------|--------------|----|
| 4.449e-09    | 0.3492745  | 0.31  | 0.151 | 7.932123e-05 | 24 |
| CD72         | GC IgA     |       |       |              |    |
| 4.56385e-09  | 0.3440396  | 0.347 | 0.189 | 8.136888e-05 | 24 |
| MRPS11       | GC IgA     |       |       |              |    |
| 4.664651e-09 | 0.3270427  | 0.319 | 0.172 | 8.316607e-05 | 24 |
| MRPL37       | GC IgA     |       |       |              |    |
| 4.677989e-09 | 0.3237708  | 0.31  | 0.152 | 8.340387e-05 | 24 |
| MYL6B        | GC IgA     |       |       |              |    |
| 5.025144e-09 | -0.3649893 | 0.978 | 0.959 | 8.95933e-05  | 24 |
| MT-CYB       | GC IgA     |       |       |              |    |
| 5.249005e-09 | 0.3190471  | 0.167 | 0.069 | 9.358451e-05 | 24 |
| UBAP1        | GC IgA     |       |       |              |    |
| 5.600638e-09 | 0.3114931  | 0.746 | 0.554 | 9.985377e-05 | 24 |
| SNU13        | GC IgA     |       |       |              |    |
| 5.779395e-09 | -0.4111007 | 0.985 | 0.977 | 0.0001030408 | 24 |
| RPS10        | GC IgA     |       |       |              |    |
| 6.408109e-09 | 0.3326361  | 0.372 | 0.212 | 0.0001142502 | 24 |
| ACTR10       | GC IgA     |       |       |              |    |
| 6.552092e-09 | 0.3218024  | 0.303 | 0.154 | 0.0001168173 | 24 |
| GNB1         | GC IgA     |       |       |              |    |
| 7.226809e-09 | 0.3202976  | 0.372 | 0.204 | 0.0001288468 | 24 |
| OGA          | GC IgA     |       |       |              |    |
| 7.314195e-09 | 0.3668345  | 0.384 | 0.226 | 0.0001304048 | 24 |
| CYBC1        | GC IgA     |       |       |              |    |
| 7.840703e-09 | 0.31598    | 0.195 | 0.086 | 0.0001397919 | 24 |
| PPP3CB       | GC IgA     |       |       |              |    |
| 7.86206e-09  | 0.3417494  | 0.334 | 0.196 | 0.0001401727 | 24 |
| IDH2         | GC IgA     |       |       |              |    |
| 8.396879e-09 | 0.3131437  | 0.22  | 0.108 | 0.000149708  | 24 |
| NADK         | GC IgA     |       |       |              |    |
| 9.608641e-09 | 0.3508098  | 0.341 | 0.191 | 0.0001713125 | 24 |
| RFXANK       | GC IgA     |       |       |              |    |
| 9.91016e-09  | 0.3242015  | 0.372 | 0.211 | 0.0001766882 | 24 |
| NR3C1        | GC IgA     |       |       |              |    |
| 1.006885e-08 | 0.3246747  | 0.523 | 0.326 | 0.0001795175 | 24 |
| BST2         | GC IgA     |       |       |              |    |
| 1.103069e-08 | 0.3412142  | 0.291 | 0.143 | 0.0001966662 | 24 |
| FLOT1        | GC IgA     |       |       |              |    |
| 1.158978e-08 | 0.3539833  | 0.805 | 0.646 | 0.0002066342 | 24 |
| ZFAS1        | GC IgA     |       |       |              |    |
| 1.244501e-08 | 0.30697    | 0.167 | 0.071 | 0.0002218821 | 24 |
| USP6NL       | GC IgA     |       |       |              |    |
| 1.291665e-08 | 0.3120642  | 0.17  | 0.073 | 0.000230291  | 24 |
| FDX2         | GC IgA     |       |       |              |    |
| 1.315016e-08 | 0.3021468  | 0.483 | 0.306 | 0.0002344542 | 24 |
| SHKBP1       | GC IgA     |       |       |              |    |
| 1.409976e-08 | 0.3290865  | 0.316 | 0.17  | 0.0002513846 | 24 |
| EED          | GC IgA     |       |       |              |    |
| 1.450602e-08 | 0.3016798  | 0.536 | 0.348 | 0.0002586278 | 24 |
| TIMM13       | GC IgA     |       |       |              |    |

|              |                |       |              |              |    |
|--------------|----------------|-------|--------------|--------------|----|
| 1.703494e-08 | -0.4492093     | 0.071 | 0.158        | 0.0003037159 | 24 |
| TGIF1        | GC IgA         |       |              |              |    |
| 1.7797e-08   | -0.6917256     | 0.201 | 0.303        | 0.0003173027 | 24 |
| ZFP36L2      | GC IgA         |       |              |              |    |
| 2.017411e-08 | 0.3091139      | 0.415 | 0.243        | 0.0003596843 | 24 |
| DCTN3        | GC IgA         |       |              |              |    |
| 2.328053e-08 | 0.3127444      | 0.402 | 0.248        | 0.0004150686 | 24 |
| THOC2        | GC IgA         |       |              |              |    |
| 2.425819e-08 | 0.3846334      | 0.492 | 0.325        | 0.0004324993 | 24 |
| MRPS36       | GC IgA         |       |              |              |    |
| 2.583796e-08 | 0.3145407      | 0.573 | 0.384        | 0.000460665  | 24 |
| UQCRC2       | GC IgA         |       |              |              |    |
| 2.683234e-08 | 0.3136422      | 0.489 | 0.3          | 0.0004783937 | 24 |
| CDK2AP2      | GC IgA         |       |              |              |    |
| 2.716813e-08 | 0.3393789      | 0.449 | 0.283        | 0.0004843806 | 24 |
| RTF2         | GC IgA         |       |              |              |    |
| 2.736248e-08 | 0.3271925      | 0.356 | 0.203        | 0.0004878457 | 24 |
| PXK          | GC IgA         |       |              |              |    |
| 2.74539e-08  | 0.302237 0.474 | 0.302 | 0.0004894756 | 24           |    |
| COPS6        | GC IgA         |       |              |              |    |
| 2.773936e-08 | 0.3271957      | 0.337 | 0.182        | 0.0004945651 | 24 |
| INPP5D       | GC IgA         |       |              |              |    |
| 2.790122e-08 | 0.3011293      | 0.415 | 0.249        | 0.0004974508 | 24 |
| COA3         | GC IgA         |       |              |              |    |
| 2.828499e-08 | -0.4172173     | 0.028 | 0.101        | 0.0005042932 | 24 |
| RHOC         | GC IgA         |       |              |              |    |
| 3.025649e-08 | 0.3092396      | 0.406 | 0.247        | 0.000539443  | 24 |
| SNRPN        | GC IgA         |       |              |              |    |
| 3.115135e-08 | -0.6592678     | 0.477 | 0.53         | 0.0005553975 | 24 |
| PSME2        | GC IgA         |       |              |              |    |
| 3.696216e-08 | 0.3229252      | 0.248 | 0.133        | 0.0006589984 | 24 |
| CIAPIN1      | GC IgA         |       |              |              |    |
| 3.748866e-08 | -0.4729918     | 0.071 | 0.158        | 0.0006683853 | 24 |
| SLC2A3       | GC IgA         |       |              |              |    |
| 4.003152e-08 | 0.3172932      | 0.372 | 0.205        | 0.0007137221 | 24 |
| IKZF3        | GC IgA         |       |              |              |    |
| 4.233127e-08 | 0.432822 0.498 | 0.274 | 0.0007547242 | 24           |    |
| EIF1AY       | GC IgA         |       |              |              |    |
| 4.822108e-08 | 0.3172055      | 0.279 | 0.144        | 0.0008597337 | 24 |
| SUDS3        | GC IgA         |       |              |              |    |
| 4.958151e-08 | -0.3472581     | 0.969 | 0.976        | 0.0008839888 | 24 |
| RPL36A       | GC IgA         |       |              |              |    |
| 4.970268e-08 | 0.3260202      | 0.446 | 0.27         | 0.000886149  | 24 |
| TXNL4A       | GC IgA         |       |              |              |    |
| 5.117097e-08 | 0.3022848      | 0.412 | 0.246        | 0.0009123271 | 24 |
| TRAPPC2L     | GC IgA         |       |              |              |    |
| 6.578458e-08 | 0.3258256      | 0.291 | 0.16         | 0.001172873  | 24 |
| DCPS         | GC IgA         |       |              |              |    |
| 6.737584e-08 | 0.3097869      | 0.257 | 0.133        | 0.001201244  | 24 |
| RAB9A        | GC IgA         |       |              |              |    |

|              |            |       |       |             |    |
|--------------|------------|-------|-------|-------------|----|
| 6.858285e-08 | 0.3086333  | 0.322 | 0.182 | 0.001222764 | 24 |
| MAP2K2       | GC IgA     |       |       |             |    |
| 8.784816e-08 | -0.5097212 | 0.133 | 0.229 | 0.001566245 | 24 |
| NT5C3A       | GC IgA     |       |       |             |    |
| 1.08541e-07  | 0.3279962  | 0.551 | 0.368 | 0.001935177 | 24 |
| FAM96B       | GC IgA     |       |       |             |    |
| 1.110192e-07 | -0.6482608 | 0.372 | 0.468 | 0.001979361 | 24 |
| ITM2B        | GC IgA     |       |       |             |    |
| 1.171353e-07 | 0.3021691  | 0.508 | 0.336 | 0.002088405 | 24 |
| BUD31        | GC IgA     |       |       |             |    |
| 1.194363e-07 | -0.5997909 | 0.421 | 0.493 | 0.002129429 | 24 |
| ANKRD12      | GC IgA     |       |       |             |    |
| 1.202263e-07 | 0.3282666  | 0.52  | 0.357 | 0.002143515 | 24 |
| TMEM243      | GC IgA     |       |       |             |    |
| 1.328244e-07 | -0.4384682 | 0.121 | 0.22  | 0.002368126 | 24 |
| CCDC50       | GC IgA     |       |       |             |    |
| 1.401124e-07 | -0.4589158 | 0.087 | 0.167 | 0.002498063 | 24 |
| CBX6         | GC IgA     |       |       |             |    |
| 1.432526e-07 | 0.3170425  | 0.378 | 0.228 | 0.002554051 | 24 |
| HIKESHI      | GC IgA     |       |       |             |    |
| 1.4398e-07   | -0.444288  | 0.105 | 0.185 | 0.00256702  | 24 |
| FKBP4        | GC IgA     |       |       |             |    |
| 1.521369e-07 | 0.3127293  | 0.334 | 0.177 | 0.002712448 | 24 |
| PHYKPL       | GC IgA     |       |       |             |    |
| 1.878182e-07 | 0.3043801  | 0.365 | 0.213 | 0.00334861  | 24 |
| TIAL1        | GC IgA     |       |       |             |    |
| 2.294445e-07 | 0.3324993  | 0.461 | 0.302 | 0.004090765 | 24 |
| GLRX3        | GC IgA     |       |       |             |    |
| 3.364035e-07 | 0.30074    | 0.325 | 0.181 | 0.005997739 | 24 |
| NDUFS4       | GC IgA     |       |       |             |    |
| 3.513791e-07 | -0.7580136 | 0.446 | 0.5   | 0.006264738 | 24 |
| SSR4         | GC IgA     |       |       |             |    |
| 3.562314e-07 | 0.3193134  | 0.492 | 0.311 | 0.006351249 | 24 |
| MZT2A        | GC IgA     |       |       |             |    |
| 3.667913e-07 | -0.3900596 | 0.402 | 0.174 | 0.006539523 | 24 |
| MZB1         | GC IgA     |       |       |             |    |
| 4.297108e-07 | -0.4840464 | 0.173 | 0.252 | 0.007661315 | 24 |
| DNPH1        | GC IgA     |       |       |             |    |
| 5.048094e-07 | -0.3955794 | 0.056 | 0.12  | 0.009000248 | 24 |
| IL27RA       | GC IgA     |       |       |             |    |
| 5.621108e-07 | -0.4407041 | 0.966 | 0.963 | 0.01002187  | 24 |
| FTL          | GC IgA     |       |       |             |    |
| 5.869794e-07 | 0.3113223  | 0.192 | 0.1   | 0.01046526  | 24 |
| SYNC         | GC IgA     |       |       |             |    |
| 7.263017e-07 | -0.666616  | 0.598 | 0.597 | 0.01294923  | 24 |
| LDHA         | GC IgA     |       |       |             |    |
| 8.017545e-07 | -0.3637893 | 0.062 | 0.123 | 0.01429448  | 24 |
| RAB13        | GC IgA     |       |       |             |    |
| 8.067176e-07 | -0.4172395 | 0.043 | 0.106 | 0.01438297  | 24 |
| C1orf162     | GC IgA     |       |       |             |    |



|              |            |       |       |            |    |
|--------------|------------|-------|-------|------------|----|
| 9.554596e-07 | -0.4771725 | 0.158 | 0.232 | 0.01703489 | 24 |
| HSD17B11     | GC IgA     |       |       |            |    |
| 1.118009e-06 | -0.580088  | 0.433 | 0.502 | 0.01993298 | 24 |
| FOXP1        | GC IgA     |       |       |            |    |
| 1.186325e-06 | -0.5565798 | 0.251 | 0.327 | 0.02115099 | 24 |
| SLC3A2       | GC IgA     |       |       |            |    |
| 1.415985e-06 | 0.3247958  | 0.433 | 0.303 | 0.0252456  | 24 |
| CHMP2A       | GC IgA     |       |       |            |    |
| 1.446605e-06 | -0.4404628 | 0.13  | 0.219 | 0.02579153 | 24 |
| EIF4EBP1     | GC IgA     |       |       |            |    |
| 1.844842e-06 | -0.3181607 | 0.046 | 0.115 | 0.03289169 | 24 |
| PYCR1        | GC IgA     |       |       |            |    |
| 3.407891e-06 | -0.3292282 | 0.056 | 0.116 | 0.06075929 | 24 |
| ENTPD1       | GC IgA     |       |       |            |    |
| 3.841795e-06 | -0.4492655 | 0.74  | 0.753 | 0.06849537 | 24 |
| TOMM7        | GC IgA     |       |       |            |    |
| 4.27912e-06  | -0.3540854 | 0.043 | 0.105 | 0.07629243 | 24 |
| PDE4B        | GC IgA     |       |       |            |    |
| 4.292365e-06 | -0.4451354 | 0.604 | 0.635 | 0.07652858 | 24 |
| GPX4         | GC IgA     |       |       |            |    |
| 5.875571e-06 | -0.4273367 | 0.214 | 0.298 | 0.1047555  | 24 |
| RNASEH2B     | GC IgA     |       |       |            |    |
| 6.371501e-06 | 0.3277878  | 0.155 | 0.066 | 0.1135975  | 24 |
| RASGEF1B     | GC IgA     |       |       |            |    |
| 7.239297e-06 | -0.5633489 | 0.266 | 0.328 | 0.1290694  | 24 |
| ZFP36        | GC IgA     |       |       |            |    |
| 7.304019e-06 | -0.4408152 | 0.102 | 0.161 | 0.1302234  | 24 |
| DDIT4        | GC IgA     |       |       |            |    |
| 7.719976e-06 | 0.3604     | 0.932 | 0.802 | 0.1376395  | 24 |
| RPS26        | GC IgA     |       |       |            |    |
| 8.017002e-06 | -0.4058352 | 0.133 | 0.208 | 0.1429351  | 24 |
| GNL3         | GC IgA     |       |       |            |    |
| 8.871022e-06 | -0.3053753 | 0.046 | 0.109 | 0.1581614  | 24 |
| HEXB         | GC IgA     |       |       |            |    |
| 9.085087e-06 | -0.3569686 | 0.901 | 0.917 | 0.161978   | 24 |
| PFDN5        | GC IgA     |       |       |            |    |
| 9.687183e-06 | -0.4443317 | 0.737 | 0.757 | 0.1727128  | 24 |
| MT-ND5       | GC IgA     |       |       |            |    |
| 1.449295e-05 | -0.7556094 | 0.755 | 0.751 | 0.2583947  | 24 |
| CXCR4        | GC IgA     |       |       |            |    |
| 1.645529e-05 | -0.426797  | 0.121 | 0.194 | 0.2933814  | 24 |
| ADK          | GC IgA     |       |       |            |    |
| 1.729528e-05 | -0.4782629 | 0.297 | 0.337 | 0.3083575  | 24 |
| CD48         | GC IgA     |       |       |            |    |
| 1.787585e-05 | -0.4636748 | 0.133 | 0.194 | 0.3187085  | 24 |
| HSPB1        | GC IgA     |       |       |            |    |
| 1.945427e-05 | -0.4163681 | 0.235 | 0.307 | 0.3468501  | 24 |
| TMEM147      | GC IgA     |       |       |            |    |
| 2.525107e-05 | -0.5179143 | 0.226 | 0.296 | 0.4502013  | 24 |
| NFKBIA       | GC IgA     |       |       |            |    |

|              |            |       |       |           |     |
|--------------|------------|-------|-------|-----------|-----|
| 2.766013e-05 | -0.3760668 | 0.217 | 0.282 | 0.4931525 | 24  |
| MT-ND4L      | GC IgA     |       |       |           |     |
| 2.990361e-05 | -0.3710108 | 0.099 | 0.16  | 0.5331515 | 24  |
| AIDA         | GC IgA     |       |       |           |     |
| 3.286966e-05 | -0.3961558 | 0.087 | 0.137 | 0.5860332 | 24  |
| FCER2        | GC IgA     |       |       |           |     |
| 3.426947e-05 | -0.7120848 | 0.263 | 0.313 | 0.6109903 | 24  |
| HSP90B1      | GC IgA     |       |       |           |     |
| 3.447255e-05 | -0.3430454 | 0.084 | 0.15  | 0.6146111 | 24  |
| CHD1         | GC IgA     |       |       |           |     |
| 3.703216e-05 | -0.4970116 | 0.585 | 0.62  | 0.6602464 | 24  |
| IFI16        | GC IgA     |       |       |           |     |
| 3.904244e-05 | -0.3689549 | 0.214 | 0.294 | 0.6960876 | 24  |
| ACADVL       | GC IgA     |       |       |           |     |
| 3.91061e-05  | -0.7385884 | 0.625 | 0.576 | 0.6972227 | 24  |
| TUBB         | GC IgA     |       |       |           |     |
| 3.928436e-05 | -0.3016755 | 0.087 | 0.137 | 0.7004008 | 24  |
| IFRD2        | GC IgA     |       |       |           |     |
| 4.871345e-05 | -0.4876358 | 0.402 | 0.453 | 0.8685121 | 24  |
| ARL6IP1      | GC IgA     |       |       |           |     |
| 4.942373e-05 | -0.4366028 | 0.136 | 0.204 | 0.8811757 | 24  |
| IRF1         | GC IgA     |       |       |           |     |
| 5.362302e-05 | -0.4091996 | 0.186 | 0.252 | 0.9560448 | 24  |
| NFE2L2       | GC IgA     |       |       |           |     |
| 5.441426e-05 | -0.4077507 | 0.313 | 0.384 | 0.9701519 | 24  |
| LAPTM4A      | GC IgA     |       |       |           |     |
| 5.796205e-05 | -0.3380312 | 0.062 | 0.112 | 1         | 24  |
| SESN3        | GC IgA     |       |       |           |     |
| 6.855075e-05 | 0.3447941  | 0.341 | 0.205 | 1         | 24  |
| LGALS1       | GC IgA     |       |       |           |     |
| 6.916389e-05 | -0.4338272 | 0.412 | 0.45  | 1         | 24  |
| DRAP1        | GC IgA     |       |       |           |     |
| 7.078419e-05 | -0.3737447 | 0.167 | 0.232 | 1         | 24  |
| TARS         | GC IgA     |       |       |           |     |
| 7.942476e-05 | -0.344514  | 0.099 | 0.15  | 1         | 24  |
| ESYT1        | GC IgA     |       |       |           |     |
| 8.08072e-05  | -0.4035699 | 0.152 | 0.213 | 1         | 24  |
| APPL1        | GC IgA     |       |       |           |     |
| 8.525976e-05 | -0.3788231 | 0.873 | 0.854 | 1         | 24  |
| SH3BGRL3     | GC IgA     |       |       |           |     |
| 8.716153e-05 | -0.3695963 | 0.808 | 0.751 | 1         | 24  |
| HLA-C        | GC IgA     |       |       |           |     |
| 9.371417e-05 | -0.5435197 | 0.573 | 0.3   | 1         | 24  |
| HMGB2        | GC IgA     |       |       |           |     |
| 0.0001045074 | -0.3299971 | 0.068 | 0.123 | 1         | 24  |
| RNF213       | GC IgA     |       |       |           |     |
| 0.0001069038 | -0.5826475 | 0.093 | 0.131 | 1         | 24  |
|              | GC IgA     |       |       |           | MYC |
| 0.0001315408 | -0.3652682 | 0.142 | 0.197 | 1         | 24  |
| TYMP         | GC IgA     |       |       |           |     |

|                |            |       |       |   |    |     |
|----------------|------------|-------|-------|---|----|-----|
| 0.000155123    | -0.3383865 | 0.084 | 0.134 | 1 | 24 |     |
| ODF2L GC IgA   |            |       |       |   |    |     |
| 0.0001608001   | -0.4561466 | 0.402 | 0.438 | 1 | 24 |     |
| IL2RG GC IgA   |            |       |       |   |    |     |
| 0.0001626065   | -0.3164355 | 0.077 | 0.121 | 1 | 24 |     |
| LACTB GC IgA   |            |       |       |   |    |     |
| 0.0001640013   | -0.3906443 | 0.158 | 0.208 | 1 | 24 |     |
| PIM3 GC IgA    |            |       |       |   |    |     |
| 0.0002362214   | -0.3199642 | 0.065 | 0.117 | 1 | 24 |     |
| SAMD9 GC IgA   |            |       |       |   |    |     |
| 0.0002557112   | -0.3027393 | 0.149 | 0.204 | 1 | 24 |     |
| NDFIP1 GC IgA  |            |       |       |   |    |     |
| 0.0002730326   | -0.4771691 | 0.17  | 0.212 | 1 | 24 | LBH |
| GC IgA         |            |       |       |   |    |     |
| 0.0002785637   | -3.086757  | 0.402 | 0.451 | 1 | 24 |     |
| IGHG3 GC IgA   |            |       |       |   |    |     |
| 0.0002967966   | -0.3802926 | 0.303 | 0.331 | 1 | 24 |     |
| TSTD1 GC IgA   |            |       |       |   |    |     |
| 0.0003004546   | -0.3513117 | 0.121 | 0.163 | 1 | 24 |     |
| CD58 GC IgA    |            |       |       |   |    |     |
| 0.000336908    | -0.3317484 | 0.084 | 0.137 | 1 | 24 |     |
| PSAT1 GC IgA   |            |       |       |   |    |     |
| 0.0003636213   | -0.3622607 | 0.508 | 0.533 | 1 | 24 |     |
| IMPDH2 GC IgA  |            |       |       |   |    |     |
| 0.000442537    | -0.3226756 | 0.235 | 0.291 | 1 | 24 |     |
| PYURF GC IgA   |            |       |       |   |    |     |
| 0.00045891     | -0.3331777 | 0.127 | 0.172 | 1 | 24 |     |
| TRIM44 GC IgA  |            |       |       |   |    |     |
| 0.0005298926   | -0.3852314 | 0.204 | 0.246 | 1 | 24 |     |
| CKS1B GC IgA   |            |       |       |   |    |     |
| 0.000676496    | -0.4004834 | 0.291 | 0.336 | 1 | 24 |     |
| S100A11 GC IgA |            |       |       |   |    |     |
| 0.000778519    | -0.3135402 | 0.127 | 0.171 | 1 | 24 |     |
| PARP14 GC IgA  |            |       |       |   |    |     |
| 0.0008141565   | -0.3515619 | 0.288 | 0.325 | 1 | 24 |     |
| AKR1B1 GC IgA  |            |       |       |   |    |     |
| 0.0009550802   | -0.4922281 | 0.489 | 0.485 | 1 | 24 |     |
| RANBP1 GC IgA  |            |       |       |   |    |     |
| 0.001145394    | -0.4005041 | 0.241 | 0.281 | 1 | 24 |     |
| SMCHD1 GC IgA  |            |       |       |   |    |     |
| 0.001215868    | -0.311059  | 0.152 | 0.204 | 1 | 24 |     |
| PTPN1 GC IgA   |            |       |       |   |    |     |
| 0.001367181    | -0.3604213 | 0.161 | 0.189 | 1 | 24 |     |
| IFNGR1 GC IgA  |            |       |       |   |    |     |
| 0.001429991    | -0.333354  | 0.238 | 0.279 | 1 | 24 |     |
| WARS GC IgA    |            |       |       |   |    |     |
| 0.0014398      | -0.4377422 | 0.477 | 0.494 | 1 | 24 |     |
| SP100 GC IgA   |            |       |       |   |    |     |
| 0.001477798    | -0.3002266 | 0.201 | 0.247 | 1 | 24 |     |
| PABPC4 GC IgA  |            |       |       |   |    |     |

|                 |            |       |       |   |    |
|-----------------|------------|-------|-------|---|----|
| 0.001621538     | -0.338069  | 0.709 | 0.714 | 1 | 24 |
| PSME1 GC IgA    |            |       |       |   |    |
| 0.001648381     | -0.4011238 | 0.387 | 0.393 | 1 | 24 |
| TMED2 GC IgA    |            |       |       |   |    |
| 0.00174315      | -0.3086538 | 0.115 | 0.148 | 1 | 24 |
| ARRDC2 GC IgA   |            |       |       |   |    |
| 0.001822105     | -0.3118494 | 0.139 | 0.187 | 1 | 24 |
| KIF20B GC IgA   |            |       |       |   |    |
| 0.001908151     | -0.3105045 | 0.189 | 0.235 | 1 | 24 |
| EIF4A1 GC IgA   |            |       |       |   |    |
| 0.002177464     | -0.5230632 | 0.461 | 0.472 | 1 | 24 |
| CD83 GC IgA     |            |       |       |   |    |
| 0.002379407     | -0.3289925 | 0.176 | 0.211 | 1 | 24 |
| FMNL1 GC IgA    |            |       |       |   |    |
| 0.002690149     | -2.066047  | 0.17  | 0.244 | 1 | 24 |
| IGHG4 GC IgA    |            |       |       |   |    |
| 0.002804636     | -0.3993045 | 0.294 | 0.336 | 1 | 24 |
| APOBEC3C GC IgA |            |       |       |   |    |
| 0.004288789     | -0.4097692 | 0.889 | 0.868 | 1 | 24 |
| CD52 GC IgA     |            |       |       |   |    |
| 0.004394376     | -0.3677032 | 0.09  | 0.126 | 1 | 24 |
| LGALS3 GC IgA   |            |       |       |   |    |
| 0.004631871     | -0.4754515 | 0.356 | 0.36  | 1 | 24 |
| ARID5B GC IgA   |            |       |       |   |    |
| 0.004658641     | -0.3074322 | 0.279 | 0.296 | 1 | 24 |
| PDCD5 GC IgA    |            |       |       |   |    |
| 0.005408635     | -0.350939  | 0.167 | 0.188 | 1 | 24 |
| PCNA GC IgA     |            |       |       |   |    |
| 0.006432337     | -0.3470623 | 0.836 | 0.815 | 1 | 24 |
| NOP53 GC IgA    |            |       |       |   |    |
| 0.006926568     | -0.3393764 | 0.604 | 0.599 | 1 | 24 |
| CALM1 GC IgA    |            |       |       |   |    |
| 0.006959726     | -0.337919  | 0.331 | 0.342 | 1 | 24 |
| PKIG GC IgA     |            |       |       |   |    |
| 0.007191506     | -0.7030806 | 0.588 | 0.421 | 1 | 24 |
| HIST1H4C GC IgA |            |       |       |   |    |
| 0.007683048     | -0.3041836 | 0.077 | 0.112 | 1 | 24 |
| C1orf56 GC IgA  |            |       |       |   |    |
| 0.007840741     | -0.3168369 | 0.167 | 0.208 | 1 | 24 |
| CCDC32 GC IgA   |            |       |       |   |    |
| 0.008164896     | -0.3192911 | 0.167 | 0.199 | 1 | 24 |
| PPP3CA GC IgA   |            |       |       |   |    |
| 0.009001075     | -0.3064014 | 0.276 | 0.285 | 1 | 24 |
| CNPY3 GC IgA    |            |       |       |   |    |
| 0.009231296     | -0.3073085 | 0.254 | 0.276 | 1 | 24 |
| GL01 GC IgA     |            |       |       |   |    |
