# Supplementary material for: Distinct stage-specific transcriptional states of B cells derived from human tonsillar tissue
Source: PubMed Central journal article supplement (PMC10132144; doi:10.1172/jci.insight.155199), 2023-04-10
Supplement: jciinsight-8-155199-s231.pdf [file jciinsight-8-155199-s231.pdf]

| gene_name | set           |
|-----------|---------------|
| CNTN1     | CD40L_up_only |
| PRDM11    | CD40L_up_only |
| TBPL1     | CD40L_up_only |
| PIAS1     | CD40L_up_only |
| ARID1B    | CD40L_up_only |
| MSH4      | CD40L_up_only |
| STAG3     | CD40L_up_only |
| TP53BP1   | CD40L_up_only |
| FGFR3     | CD40L_up_only |
| MEF2A     | CD40L_up_only |
| RAB27A    | CD40L_up_only |
| SPTB      | CD40L_up_only |
| SLC44A1   | CD40L_up_only |
| RPS6KA2   | CD40L_up_only |
| PICALM    | CD40L_up_only |
| MARK3     | CD40L_up_only |
| BAZ2A     | CD40L_up_only |
| ICAM3     | CD40L_up_only |
| TULP3     | CD40L_up_only |
| RBF0X1    | CD40L_up_only |
| DLGAP4    | CD40L_up_only |
| TCF7      | CD40L_up_only |
| COL19A1   | CD40L_up_only |
| ZNF264    | CD40L_up_only |
| NCOA1     | CD40L_up_only |
| RAD54L    | CD40L_up_only |
| PIGS      | CD40L_up_only |
| CPXM1     | CD40L_up_only |
| SNAP23    | CD40L_up_only |
| CYP26A1   | CD40L_up_only |
| JAK2      | CD40L_up_only |
| CRYBB2P1  | CD40L_up_only |
| DCAF11    | CD40L_up_only |
| HCK       | CD40L_up_only |
| SMAD7     | CD40L_up_only |
| KLF5      | CD40L_up_only |
| SYT17     | CD40L_up_only |
| HERC1     | CD40L_up_only |
| CD276     | CD40L_up_only |
| DMXL2     | CD40L_up_only |
| IKBKB     | CD40L_up_only |
| FCER2     | CD40L_up_only |
| PLIN3     | CD40L_up_only |
| CCL24     | CD40L_up_only |
| FKTN      | CD40L_up_only |
| PALD1     | CD40L_up_only |
| PPP3CB    | CD40L_up_only |
| MED13     | CD40L_up_only |
| COL1A1    | CD40L_up_only |

|          |               |
|----------|---------------|
| SGCA     | CD40L_up_only |
| GALNT7   | CD40L_up_only |
| NRXN2    | CD40L_up_only |
| CD69     | CD40L_up_only |
| KCNA1    | CD40L_up_only |
| ALDH2    | CD40L_up_only |
| STX2     | CD40L_up_only |
| WVC1     | CD40L_up_only |
| C3orf52  | CD40L_up_only |
| RNF19B   | CD40L_up_only |
| MYCL     | CD40L_up_only |
| TNFSF4   | CD40L_up_only |
| NSL1     | CD40L_up_only |
| STX12    | CD40L_up_only |
| SLC5A9   | CD40L_up_only |
| MYB      | CD40L_up_only |
| WDR35    | CD40L_up_only |
| KLHL29   | CD40L_up_only |
| ATAD2B   | CD40L_up_only |
| PLEKHG1  | CD40L_up_only |
| ENOX1    | CD40L_up_only |
| NACA3P   | CD40L_up_only |
| TMEM131L | CD40L_up_only |
| ECHDC2   | CD40L_up_only |
| A1BG     | CD40L_up_only |
| DPPA4    | CD40L_up_only |
| ADGRB2   | CD40L_up_only |
| PIK3CA   | CD40L_up_only |
| MTERF4   | CD40L_up_only |
| KIAA1191 | CD40L_up_only |
| MED13L   | CD40L_up_only |
| MED20    | CD40L_up_only |
| TTF1     | CD40L_up_only |
| SH2D3A   | CD40L_up_only |
| KDM5C    | CD40L_up_only |
| ST3GAL3  | CD40L_up_only |
| ASL      | CD40L_up_only |
| SPECC1   | CD40L_up_only |
| SMO      | CD40L_up_only |
| TPH1     | CD40L_up_only |
| ZNF337   | CD40L_up_only |
| ABCB7    | CD40L_up_only |
| PIAS3    | CD40L_up_only |
| CLUHP3   | CD40L_up_only |
| FLOT2    | CD40L_up_only |
| FAM83F   | CD40L_up_only |
| RRAS2    | CD40L_up_only |
| KATNBL1  | CD40L_up_only |
| DOCK2    | CD40L_up_only |
| DDB2     | CD40L_up_only |

|           |               |
|-----------|---------------|
| KCNH3     | CD40L_up_only |
| NHSL1     | CD40L_up_only |
| FBXL8     | CD40L_up_only |
| TM6SF1    | CD40L_up_only |
| TANK      | CD40L_up_only |
| KIF13A    | CD40L_up_only |
| FCHSD2    | CD40L_up_only |
| PRCP      | CD40L_up_only |
| FXYD2     | CD40L_up_only |
| KYAT3     | CD40L_up_only |
| TMOD3     | CD40L_up_only |
| BBS7      | CD40L_up_only |
| CCDC65    | CD40L_up_only |
| TCF12     | CD40L_up_only |
| ZFHX3     | CD40L_up_only |
| CTTNBP2NL | CD40L_up_only |
| PI4KB     | CD40L_up_only |
| FANCD2    | CD40L_up_only |
| GRIP2     | CD40L_up_only |
| ZNF660    | CD40L_up_only |
| NXPE3     | CD40L_up_only |
| OTULINL   | CD40L_up_only |
| GNA12     | CD40L_up_only |
| TMEM168   | CD40L_up_only |
| ZCCHC7    | CD40L_up_only |
| PROSER2   | CD40L_up_only |
| CCDC82    | CD40L_up_only |
| PLCB3     | CD40L_up_only |
| ADAM8     | CD40L_up_only |
| BICD1     | CD40L_up_only |
| RABGAP1L  | CD40L_up_only |
| ATG10     | CD40L_up_only |
| CAMK4     | CD40L_up_only |
| RASGRP3   | CD40L_up_only |
| STK32B    | CD40L_up_only |
| CHST9     | CD40L_up_only |
| JPH3      | CD40L_up_only |
| LRGUK     | CD40L_up_only |
| BACH1     | CD40L_up_only |
| SAMD8     | CD40L_up_only |
| ST3GAL2   | CD40L_up_only |
| APPL1     | CD40L_up_only |
| CCDC24    | CD40L_up_only |
| RSPRY1    | CD40L_up_only |
| TCAF2P1   | CD40L_up_only |
| ICOSLG    | CD40L_up_only |
| CFAP410   | CD40L_up_only |
| PMF1      | CD40L_up_only |
| IER2      | CD40L_up_only |
| VCAM1     | CD40L_up_only |

|          |               |
|----------|---------------|
| SLC30A7  | CD40L_up_only |
| VANGL2   | CD40L_up_only |
| CAPN2    | CD40L_up_only |
| ARHGAP25 | CD40L_up_only |
| DNAJC5G  | CD40L_up_only |
| MST1R    | CD40L_up_only |
| IL15     | CD40L_up_only |
| CMYA5    | CD40L_up_only |
| ACSL6    | CD40L_up_only |
| USP49    | CD40L_up_only |
| TAGAP    | CD40L_up_only |
| NOS3     | CD40L_up_only |
| MYORG    | CD40L_up_only |
| ANKS6    | CD40L_up_only |
| CKB      | CD40L_up_only |
| PLEKHF1  | CD40L_up_only |
| MSS51    | CD40L_up_only |
| RNF169   | CD40L_up_only |
| MAPK7    | CD40L_up_only |
| NDST2    | CD40L_up_only |
| ZSCAN21  | CD40L_up_only |
| NOD2     | CD40L_up_only |
| SNX20    | CD40L_up_only |
| GNG8     | CD40L_up_only |
| DHRS13   | CD40L_up_only |
| SLC43A2  | CD40L_up_only |
| RILP     | CD40L_up_only |
| SDHAF2   | CD40L_up_only |
| PKIG     | CD40L_up_only |
| CXXC4    | CD40L_up_only |
| PARM1    | CD40L_up_only |
| PTPN9    | CD40L_up_only |
| ROB01    | CD40L_up_only |
| TCAF2    | CD40L_up_only |
| DCLK2    | CD40L_up_only |
| SPATA24  | CD40L_up_only |
| PAQR8    | CD40L_up_only |
| ATF7IP   | CD40L_up_only |
| MOB3A    | CD40L_up_only |
| TMCC1    | CD40L_up_only |
| IQCK     | CD40L_up_only |
| CEP135   | CD40L_up_only |
| TRAF6    | CD40L_up_only |
| TP53I11  | CD40L_up_only |
| KCNE5    | CD40L_up_only |
| SYNE3    | CD40L_up_only |
| AN06     | CD40L_up_only |
| OR2T35   | CD40L_up_only |
| HIC1     | CD40L_up_only |
| TBL1XR1  | CD40L_up_only |

JUN CD40L\_up\_only  
CASC2 CD40L\_up\_only  
PARP10 CD40L\_up\_only  
GPC5 CD40L\_up\_only  
PIK3CD-AS1 CD40L\_up\_only  
TIGD2 CD40L\_up\_only  
MAP6D1 CD40L\_up\_only  
PJA1 CD40L\_up\_only  
DHTKD1 CD40L\_up\_only  
PHLDA2 CD40L\_up\_only  
IBA57 CD40L\_up\_only  
TMEM30B CD40L\_up\_only  
ALG12 CD40L\_up\_only  
RGS7 CD40L\_up\_only  
LINC01547 CD40L\_up\_only  
LHFPL6 CD40L\_up\_only  
MAATS1 CD40L\_up\_only  
MED12 CD40L\_up\_only  
NUTM2A CD40L\_up\_only  
RAD51D CD40L\_up\_only  
SPATA12 CD40L\_up\_only  
PPARA CD40L\_up\_only  
TSPYL4 CD40L\_up\_only  
TCTEX1D4 CD40L\_up\_only  
HBA2 CD40L\_up\_only  
CFAP54 CD40L\_up\_only  
BNIP5 CD40L\_up\_only  
TDRD7 CD40L\_up\_only  
OR8A1 CD40L\_up\_only  
SEMA4A CD40L\_up\_only  
LCOR CD40L\_up\_only  
ZNF140 CD40L\_up\_only  
MRTFA CD40L\_up\_only  
OR2T4 CD40L\_up\_only  
FBXL22 CD40L\_up\_only  
TXNRD3 CD40L\_up\_only  
ADAMTSL2 CD40L\_up\_only  
ZNF71 CD40L\_up\_only  
HYLS1 CD40L\_up\_only  
ZXDB CD40L\_up\_only  
SMURF1 CD40L\_up\_only  
L1CAM CD40L\_up\_only  
RNU5F-1 CD40L\_up\_only  
RNU1-87P CD40L\_up\_only  
RNY1P11 CD40L\_up\_only  
RNU6-302P CD40L\_up\_only  
SNHG5 CD40L\_up\_only  
SYS1 CD40L\_up\_only  
HLA-G CD40L\_up\_only  
INSYN2B CD40L\_up\_only

TCTN1 CD40L\_up\_only  
ACOT6 CD40L\_up\_only  
HACD2 CD40L\_up\_only  
MIR181B2 CD40L\_up\_only  
IGKC CD40L\_up\_only  
IGKV4-1 CD40L\_up\_only  
IGLV1-51 CD40L\_up\_only  
IGLV1-47 CD40L\_up\_only  
IGLV7-46 CD40L\_up\_only  
IGLV1-44 CD40L\_up\_only  
IGLV1-40 CD40L\_up\_only  
IGLV3-25 CD40L\_up\_only  
IGLV2-23 CD40L\_up\_only  
IGLV3-19 CD40L\_up\_only  
IGLV3-1 CD40L\_up\_only  
IGLJ1 CD40L\_up\_only  
IGLC3 CD40L\_up\_only  
IGHE CD40L\_up\_only  
PDCL3P5 CD40L\_up\_only  
SUPT4H1 CD40L\_up\_only  
RPL7AP50 CD40L\_up\_only  
GNL3LP1 CD40L\_up\_only  
RAET1K CD40L\_up\_only  
ZGLP1 CD40L\_up\_only  
LINC01465 CD40L\_up\_only  
PGAM1P6 CD40L\_up\_only  
TNP01P1 CD40L\_up\_only  
NUTM2B-AS1 CD40L\_up\_only  
KCNMA1-AS3 CD40L\_up\_only  
MROCKI CD40L\_up\_only  
EEF1A1P11 CD40L\_up\_only  
ARL17B CD40L\_up\_only  
LINC02768 CD40L\_up\_only  
LINC01362 CD40L\_up\_only  
HNRNPA1P68 CD40L\_up\_only  
LINC01712 CD40L\_up\_only  
PRDX3P2 CD40L\_up\_only  
TRAF3IP2-AS1 CD40L\_up\_only  
C4BPAP2 CD40L\_up\_only  
ATP11A-AS1 CD40L\_up\_only  
TNF CD40L\_up\_only  
HNRNPA1P49 CD40L\_up\_only  
MAP3K5-AS1 CD40L\_up\_only  
USP27X-AS1 CD40L\_up\_only  
ERICH3-AS1 CD40L\_up\_only  
SETP9 CD40L\_up\_only  
C12orf75 CD40L\_up\_only  
LINC01055 CD40L\_up\_only  
ASH1L-AS1 CD40L\_up\_only  
CHCHD4P3 CD40L\_up\_only

TMSB4XP1 CD40L\_up\_only  
NONOP2 CD40L\_up\_only  
ZEB2-AS1 CD40L\_up\_only  
RNU7-45P CD40L\_up\_only  
IGKV1-17 CD40L\_up\_only  
RPS6P25 CD40L\_up\_only  
RN7SL328P CD40L\_up\_only  
RPL36A CD40L\_up\_only  
IGKV1-33 CD40L\_up\_only  
LINC00971 CD40L\_up\_only  
RPSAP26 CD40L\_up\_only  
APOBEC3C CD40L\_up\_only  
LINC02709 CD40L\_up\_only  
FRG1-DT CD40L\_up\_only  
LRP4-AS1 CD40L\_up\_only  
LINC01596 CD40L\_up\_only  
CTBP2P4 CD40L\_up\_only  
LINC02615 CD40L\_up\_only  
IGKV1D-39 CD40L\_up\_only  
RNU6-367P CD40L\_up\_only  
IGLL5 CD40L\_up\_only  
SYS1-DBNDD2 CD40L\_up\_only  
LINC00273 CD40L\_up\_only  
DENND11 CD40L\_up\_only  
MGAM CD40L\_up\_only  
SPESP1 CD40L\_up\_only  
LINC02316 CD40L\_up\_only  
LINC02490 CD40L\_up\_only  
SPDYE6 CD40L\_up\_only  
FBXL19-AS1 CD40L\_up\_only  
ADAMTS7P3 CD40L\_up\_only  
LINC01686 CD40L\_up\_only  
IKBKE CD40L\_up\_only  
DLGAP1-AS4 CD40L\_up\_only  
MIR4298 CD40L\_up\_only  
RN7SL405P CD40L\_up\_only  
MIR4540 CD40L\_up\_only  
TSP0AP1-AS1 CD40L\_up\_only  
MIR4476 CD40L\_up\_only  
LINC02132 CD40L\_up\_only  
SNORD11B CD40L\_up\_only  
LINC01215 CD40L\_up\_only  
RNA5SP108 CD40L\_up\_only  
RN7SL726P CD40L\_up\_only  
BMS1P14 CD40L\_up\_only  
RN7SL575P CD40L\_up\_only  
ARRDC3-AS1 CD40L\_up\_only  
PRR33 CD40L\_up\_only  
TPTEP2-CSNK1E CD40L\_up\_only  
FUCA2 BCR\_up\_only

|          |             |
|----------|-------------|
| LASP1    | BCR_up_only |
| MATK     | BCR_up_only |
| RHBDF1   | BCR_up_only |
| RH0BTB2  | BCR_up_only |
| CD22     | BCR_up_only |
| XYLT2    | BCR_up_only |
| AKAP11   | BCR_up_only |
| SH2D2A   | BCR_up_only |
| POU2F2   | BCR_up_only |
| ATP6V0A1 | BCR_up_only |
| THAP3    | BCR_up_only |
| TNFRSF17 | BCR_up_only |
| USP13    | BCR_up_only |
| ANKS1A   | BCR_up_only |
| NTHL1    | BCR_up_only |
| KDM4A    | BCR_up_only |
| SYT1     | BCR_up_only |
| GBA2     | BCR_up_only |
| NDST1    | BCR_up_only |
| LMCD1    | BCR_up_only |
| PTPN18   | BCR_up_only |
| CIC      | BCR_up_only |
| TDRD3    | BCR_up_only |
| NOA1     | BCR_up_only |
| ZNF213   | BCR_up_only |
| GNAS     | BCR_up_only |
| ERP29    | BCR_up_only |
| NAT14    | BCR_up_only |
| WHRN     | BCR_up_only |
| NEFH     | BCR_up_only |
| KIAA0930 | BCR_up_only |
| IL2RB    | BCR_up_only |
| PYGB     | BCR_up_only |
| ABHD12   | BCR_up_only |
| CTSZ     | BCR_up_only |
| UBL4A    | BCR_up_only |
| ACP5     | BCR_up_only |
| HCFC1R1  | BCR_up_only |
| MPG      | BCR_up_only |
| NME4     | BCR_up_only |
| METRN    | BCR_up_only |
| CLUAP1   | BCR_up_only |
| HOMER2   | BCR_up_only |
| CCDC61   | BCR_up_only |
| DNASE2   | BCR_up_only |
| USF2     | BCR_up_only |
| FKBP8    | BCR_up_only |
| ERF      | BCR_up_only |
| PIK3CG   | BCR_up_only |
| PLEKHA8  | BCR_up_only |



|          |             |
|----------|-------------|
| IMPDH1   | BCR_up_only |
| RPA3     | BCR_up_only |
| ALDOC    | BCR_up_only |
| CCDC34   | BCR_up_only |
| KRT18    | BCR_up_only |
| ACAD10   | BCR_up_only |
| OAS2     | BCR_up_only |
| RASAL1   | BCR_up_only |
| ENO2     | BCR_up_only |
| PTPN6    | BCR_up_only |
| MAN1A1   | BCR_up_only |
| RNF130   | BCR_up_only |
| DBN1     | BCR_up_only |
| ACTR8    | BCR_up_only |
| BCL6     | BCR_up_only |
| RAP1A    | BCR_up_only |
| CD48     | BCR_up_only |
| ID3      | BCR_up_only |
| LRMP     | BCR_up_only |
| PHF19    | BCR_up_only |
| KDSR     | BCR_up_only |
| LGALS1   | BCR_up_only |
| TRIM25   | BCR_up_only |
| CRY2     | BCR_up_only |
| SEPTIN7  | BCR_up_only |
| AGO2     | BCR_up_only |
| USP22    | BCR_up_only |
| DEK      | BCR_up_only |
| MBOAT7   | BCR_up_only |
| AHDC1    | BCR_up_only |
| RAC2     | BCR_up_only |
| THEM6    | BCR_up_only |
| ANGPTL6  | BCR_up_only |
| NFATC1   | BCR_up_only |
| KCNC3    | BCR_up_only |
| MGAT1    | BCR_up_only |
| NDFIP1   | BCR_up_only |
| C19orf57 | BCR_up_only |
| FCRLA    | BCR_up_only |
| TBC1D14  | BCR_up_only |
| PRMT7    | BCR_up_only |
| HMGB1P5  | BCR_up_only |
| CD180    | BCR_up_only |
| GSTM1    | BCR_up_only |
| TAOK3    | BCR_up_only |
| SPRY2    | BCR_up_only |
| TTYH3    | BCR_up_only |
| SLC31A1  | BCR_up_only |
| ATP6V1G1 | BCR_up_only |
| HINT2    | BCR_up_only |

|          |             |
|----------|-------------|
| ZSCAN9   | BCR_up_only |
| MYOF     | BCR_up_only |
| SLC39A8  | BCR_up_only |
| RAB20    | BCR_up_only |
| ITGAX    | BCR_up_only |
| ZCCHC14  | BCR_up_only |
| RANBP10  | BCR_up_only |
| EVI5L    | BCR_up_only |
| SH3BGRL3 | BCR_up_only |
| LM04     | BCR_up_only |
| CD53     | BCR_up_only |
| FCRL5    | BCR_up_only |
| OCIAD2   | BCR_up_only |
| ANKRD31  | BCR_up_only |
| FAM50B   | BCR_up_only |
| DOK3     | BCR_up_only |
| CRIP3    | BCR_up_only |
| PLPP5    | BCR_up_only |
| ADM      | BCR_up_only |
| ENDOD1   | BCR_up_only |
| SLX4IP   | BCR_up_only |
| GRIK4    | BCR_up_only |
| NUDT22   | BCR_up_only |
| QDPR     | BCR_up_only |
| RNF144A  | BCR_up_only |
| RMND5A   | BCR_up_only |
| ENAH     | BCR_up_only |
| PIK3AP1  | BCR_up_only |
| CCNB2    | BCR_up_only |
| H2BC5    | BCR_up_only |
| CD1C     | BCR_up_only |
| SELENON  | BCR_up_only |
| GFI1     | BCR_up_only |
| H3-3A    | BCR_up_only |
| KBTBD8   | BCR_up_only |
| IFI16    | BCR_up_only |
| MTMR14   | BCR_up_only |
| FYC01    | BCR_up_only |
| TEX264   | BCR_up_only |
| DUSP7    | BCR_up_only |
| GFM2     | BCR_up_only |
| PEX2     | BCR_up_only |
| HECTD2   | BCR_up_only |
| SKA3     | BCR_up_only |
| ARF6     | BCR_up_only |
| PIP4P1   | BCR_up_only |
| TPP1     | BCR_up_only |
| ANKRD11  | BCR_up_only |
| KLK1     | BCR_up_only |
| KLK4     | BCR_up_only |

|          |             |
|----------|-------------|
| VWCE     | BCR_up_only |
| PNOC     | BCR_up_only |
| BMI1     | BCR_up_only |
| SLC33A1  | BCR_up_only |
| TM2D2    | BCR_up_only |
| IRF2BP1  | BCR_up_only |
| RNF139   | BCR_up_only |
| MFN1     | BCR_up_only |
| TADA3    | BCR_up_only |
| GAA      | BCR_up_only |
| LDHAL6B  | BCR_up_only |
| QARS1    | BCR_up_only |
| CXCR6    | BCR_up_only |
| CERS6    | BCR_up_only |
| VEGFB    | BCR_up_only |
| DDIT3    | BCR_up_only |
| LONRF3   | BCR_up_only |
| RPS6KB2  | BCR_up_only |
| MTHFR    | BCR_up_only |
| DEAF1    | BCR_up_only |
| HASPIN   | BCR_up_only |
| GBA      | BCR_up_only |
| CD151    | BCR_up_only |
| DMAP1    | BCR_up_only |
| COX14    | BCR_up_only |
| DPM3     | BCR_up_only |
| MAGED1   | BCR_up_only |
| SEPHS2   | BCR_up_only |
| H2BC4    | BCR_up_only |
| D2HGDH   | BCR_up_only |
| IDH2     | BCR_up_only |
| PAPPA    | BCR_up_only |
| BEGAIN   | BCR_up_only |
| ZNRF3    | BCR_up_only |
| CLECL1   | BCR_up_only |
| KNTC1    | BCR_up_only |
| RNLS     | BCR_up_only |
| BRI3BP   | BCR_up_only |
| IFNLR1   | BCR_up_only |
| ROR1     | BCR_up_only |
| ARHGAP30 | BCR_up_only |
| GCNT1    | BCR_up_only |
| TRPV2    | BCR_up_only |
| FOCAD    | BCR_up_only |
| HMGB1    | BCR_up_only |
| TECPR2   | BCR_up_only |
| GM2A     | BCR_up_only |
| SERTAD1  | BCR_up_only |
| ZNF398   | BCR_up_only |
| H4C11    | BCR_up_only |

SERPINA1 BCR\_up\_only  
PELI1 BCR\_up\_only  
MPEG1 BCR\_up\_only  
CARD11 BCR\_up\_only  
ZNF627 BCR\_up\_only  
F5 BCR\_up\_only  
BHLHB9 BCR\_up\_only  
ARMCX6 BCR\_up\_only  
RNU6-212P BCR\_up\_only  
RNU6-979P BCR\_up\_only  
MDP1 BCR\_up\_only  
CPNE1 BCR\_up\_only  
BCAR3-AS1 BCR\_up\_only  
LINC01567 BCR\_up\_only  
KCNQ5-AS1 BCR\_up\_only  
KNOP1P4 BCR\_up\_only  
GPX1 BCR\_up\_only  
RNASEH1-AS1 BCR\_up\_only  
NFS1 BCR\_up\_only  
RN7SL211P BCR\_up\_only  
NEAT1 BCR\_up\_only  
FAM86EP BCR\_up\_only  
MIR2116 BCR\_up\_only  
SOX5-AS1 BCR\_up\_only  
CENPUP2 BCR\_up\_only  
NSFP1 BCR\_up\_only  
DYNLL2 BCR\_up\_only  
LINC01480 BCR\_up\_only  
PHACTR2P1 BCR\_up\_only  
H2AC14 BCR\_up\_only  
GLIDR BCR\_up\_only  
DPM1 COSTIM\_up  
GCLC COSTIM\_up  
NFYA COSTIM\_up  
LAS1L COSTIM\_up  
ENPP4 COSTIM\_up  
ANKIB1 COSTIM\_up  
CYP51A1 COSTIM\_up  
LAP3 COSTIM\_up  
MAD1L1 COSTIM\_up  
SNX11 COSTIM\_up  
M6PR COSTIM\_up  
ALS2 COSTIM\_up  
CFLAR COSTIM\_up  
ARF5 COSTIM\_up  
POLDIP2 COSTIM\_up  
AK2 COSTIM\_up  
FKBP4 COSTIM\_up  
KDM1A COSTIM\_up  
RECQL COSTIM\_up

NDUFAB1 COSTIM\_up  
ARX COSTIM\_up  
SLC25A13 COSTIM\_up  
ST7 COSTIM\_up  
HCCS COSTIM\_up  
DVL2 COSTIM\_up  
UPF1 COSTIM\_up  
SLC25A5 COSTIM\_up  
POLR2J COSTIM\_up  
DHX33 COSTIM\_up  
LIG3 COSTIM\_up  
RPAP3 COSTIM\_up  
CIAPIN1 COSTIM\_up  
GCFC2 COSTIM\_up  
IBTK COSTIM\_up  
MYCBP2 COSTIM\_up  
LAMP2 COSTIM\_up  
REX1BD COSTIM\_up  
CRLF1 COSTIM\_up  
AP2B1 COSTIM\_up  
ZNF263 COSTIM\_up  
RALA COSTIM\_up  
BAIAP2L1 COSTIM\_up  
AGK COSTIM\_up  
GGCT COSTIM\_up  
DBF4 COSTIM\_up  
IFRD1 COSTIM\_up  
COX10 COSTIM\_up  
GTF2IRD1 COSTIM\_up  
PAF1 COSTIM\_up  
ELAC2 COSTIM\_up  
PNPLA4 COSTIM\_up  
ADIPOR2 COSTIM\_up  
PRSS21 COSTIM\_up  
CCDC124 COSTIM\_up  
PAFAH1B1 COSTIM\_up  
KIAA0100 COSTIM\_up  
NA COSTIM\_up  
RPUSD1 COSTIM\_up  
TSR3 COSTIM\_up  
PIGQ COSTIM\_up  
TEAD3 COSTIM\_up  
DNAJC11 COSTIM\_up  
PSMB1 COSTIM\_up  
JARID2 COSTIM\_up  
NADK COSTIM\_up  
CYB561 COSTIM\_up  
SPAG9 COSTIM\_up  
CELSR3 COSTIM\_up  
SS18L2 COSTIM\_up

|           |           |
|-----------|-----------|
| MPND      | COSTIM_up |
| CRY1      | COSTIM_up |
| NFIX      | COSTIM_up |
| IL32      | COSTIM_up |
| PKD1      | COSTIM_up |
| MED24     | COSTIM_up |
| RPS20     | COSTIM_up |
| CSDE1     | COSTIM_up |
| UBE3C     | COSTIM_up |
| VTA1      | COSTIM_up |
| BAZ1B     | COSTIM_up |
| RANBP9    | COSTIM_up |
| SPRTN     | COSTIM_up |
| EEF1AKNMT | COSTIM_up |
| ZNF207    | COSTIM_up |
| UQCRC1    | COSTIM_up |
| STARD3NL  | COSTIM_up |
| SCMH1     | COSTIM_up |
| EL0A      | COSTIM_up |
| LYPLA2    | COSTIM_up |
| CLCN6     | COSTIM_up |
| MRC2      | COSTIM_up |
| NME1-NME2 | COSTIM_up |
| BTBD7     | COSTIM_up |
| APBA3     | COSTIM_up |
| ABHD5     | COSTIM_up |
| UTP18     | COSTIM_up |
| PTBP1     | COSTIM_up |
| LARS2     | COSTIM_up |
| WIZ       | COSTIM_up |
| PPP5C     | COSTIM_up |
| ZBTB32    | COSTIM_up |
| ERCC1     | COSTIM_up |
| MBTPS2    | COSTIM_up |
| PRICKLE3  | COSTIM_up |
| MAP4K5    | COSTIM_up |
| PSMC4     | COSTIM_up |
| SLC25A39  | COSTIM_up |
| MVP       | COSTIM_up |
| POLR3B    | COSTIM_up |
| RNF14     | COSTIM_up |
| DNASE1L1  | COSTIM_up |
| DDX11     | COSTIM_up |
| POLA2     | COSTIM_up |
| ZC3H3     | COSTIM_up |
| MDH1      | COSTIM_up |
| SLC30A9   | COSTIM_up |
| ZMYND11   | COSTIM_up |
| BID       | COSTIM_up |
| MATR3     | COSTIM_up |

|                |           |
|----------------|-----------|
| NUDCD3         | COSTIM_up |
| GLT8D1         | COSTIM_up |
| ATP2C1         | COSTIM_up |
| IGF1           | COSTIM_up |
| SLC38A5        | COSTIM_up |
| RALBP1         | COSTIM_up |
| RUFY3          | COSTIM_up |
| AGPS           | COSTIM_up |
| CXorf56        | COSTIM_up |
| TTC27          | COSTIM_up |
| CD74           | COSTIM_up |
| NCDN           | COSTIM_up |
| ZFP64          | COSTIM_up |
| MNAT1          | COSTIM_up |
| RUNX3          | COSTIM_up |
| AQR            | COSTIM_up |
| RTF2           | COSTIM_up |
| GABRA1         | COSTIM_up |
| RNF10          | COSTIM_up |
| RNH1           | COSTIM_up |
| NDUFS1         | COSTIM_up |
| ALAS1          | COSTIM_up |
| BIRC3          | COSTIM_up |
| GLRX2          | COSTIM_up |
| SNAPC1         | COSTIM_up |
| STRAP          | COSTIM_up |
| GCLM           | COSTIM_up |
| RRAGD          | COSTIM_up |
| HSF2           | COSTIM_up |
| PHF20          | COSTIM_up |
| TYMP           | COSTIM_up |
| NCAPH2         | COSTIM_up |
| TOMM34         | COSTIM_up |
| KPNA6          | COSTIM_up |
| VIM            | COSTIM_up |
| RTEL1-TNFRSF6B | COSTIM_up |
| FAS            | COSTIM_up |
| CD44           | COSTIM_up |
| SLAMF7         | COSTIM_up |
| MIPEP          | COSTIM_up |
| IFNGR1         | COSTIM_up |
| B4GALT7        | COSTIM_up |
| VRK2           | COSTIM_up |
| TNFRSF1B       | COSTIM_up |
| VEZT           | COSTIM_up |
| BRD9           | COSTIM_up |
| SNX1           | COSTIM_up |
| ARNTL2         | COSTIM_up |
| BCLAF1         | COSTIM_up |
| SLC39A9        | COSTIM_up |

BAK1 COSTIM\_up  
GRN COSTIM\_up  
ARHGAP31 COSTIM\_up  
SARS1 COSTIM\_up  
RANBP3 COSTIM\_up  
EIPR1 COSTIM\_up  
ALG1 COSTIM\_up  
ABCF2 COSTIM\_up  
CHPF2 COSTIM\_up  
UBA6 COSTIM\_up  
MAP2K3 COSTIM\_up  
GABARAPL2 COSTIM\_up  
FAM136A COSTIM\_up  
NSMAF COSTIM\_up  
RPL26L1 COSTIM\_up  
NSUN2 COSTIM\_up  
METTL1 COSTIM\_up  
PI4K2B COSTIM\_up  
EDC4 COSTIM\_up  
TRIO COSTIM\_up  
CLEC16A COSTIM\_up  
MTREX COSTIM\_up  
PHLPP2 COSTIM\_up  
SPDL1 COSTIM\_up  
CTNS COSTIM\_up  
PHF23 COSTIM\_up  
INPP4A COSTIM\_up  
PSMA4 COSTIM\_up  
LSG1 COSTIM\_up  
TDP1 COSTIM\_up  
AIFM2 COSTIM\_up  
AP2S1 COSTIM\_up  
ZPBP COSTIM\_up  
DCUN1D1 COSTIM\_up  
JADE2 COSTIM\_up  
CUL7 COSTIM\_up  
HSPA5 COSTIM\_up  
GEMIN8 COSTIM\_up  
ATP6V1H COSTIM\_up  
POLR2B COSTIM\_up  
TPR COSTIM\_up  
DTNBP1 COSTIM\_up  
MAP4 COSTIM\_up  
HDAC9 COSTIM\_up  
NOP16 COSTIM\_up  
ZNF800 COSTIM\_up  
MRPS10 COSTIM\_up  
CELF2 COSTIM\_up  
FAM120A COSTIM\_up  
R3HDM1 COSTIM\_up



|          |           |
|----------|-----------|
| ERCC8    | COSTIM_up |
| PER3     | COSTIM_up |
| TNFRSF9  | COSTIM_up |
| RCN1     | COSTIM_up |
| RFC2     | COSTIM_up |
| CLPTM1L  | COSTIM_up |
| NEDD4L   | COSTIM_up |
| PTCD2    | COSTIM_up |
| MCUR1    | COSTIM_up |
| HERPUD1  | COSTIM_up |
| HEBP2    | COSTIM_up |
| MPHOSPH9 | COSTIM_up |
| SIKE1    | COSTIM_up |
| RRP12    | COSTIM_up |
| MSM01    | COSTIM_up |
| MRT04    | COSTIM_up |
| USE1     | COSTIM_up |
| TRAPPC3  | COSTIM_up |
| THRAP3   | COSTIM_up |
| PHPT1    | COSTIM_up |
| LY75     | COSTIM_up |
| CHRD12   | COSTIM_up |
| RELT     | COSTIM_up |
| NOP58    | COSTIM_up |
| SZRD1    | COSTIM_up |
| CUL1     | COSTIM_up |
| TAB2     | COSTIM_up |
| EIF2AK2  | COSTIM_up |
| MRPL43   | COSTIM_up |
| HPF1     | COSTIM_up |
| ZFR      | COSTIM_up |
| ZNF280C  | COSTIM_up |
| TRAF1    | COSTIM_up |
| SOAT1    | COSTIM_up |
| GDI2     | COSTIM_up |
| PRDM1    | COSTIM_up |
| ATG5     | COSTIM_up |
| TMCC3    | COSTIM_up |
| PITHD1   | COSTIM_up |
| SEC61A1  | COSTIM_up |
| RASGRF1  | COSTIM_up |
| POLR3E   | COSTIM_up |
| RIOK2    | COSTIM_up |
| NDC1     | COSTIM_up |
| ALDH18A1 | COSTIM_up |
| TARBP1   | COSTIM_up |
| GATB     | COSTIM_up |
| CDK17    | COSTIM_up |
| DNAJC25  | COSTIM_up |
| PSD      | COSTIM_up |

|          |           |
|----------|-----------|
| CTDP1    | COSTIM_up |
| YBX3     | COSTIM_up |
| WNK1     | COSTIM_up |
| CCAR1    | COSTIM_up |
| OGFR     | COSTIM_up |
| PIGV     | COSTIM_up |
| SNRNP40  | COSTIM_up |
| QSER1    | COSTIM_up |
| MPC1     | COSTIM_up |
| BCAT1    | COSTIM_up |
| MRPS35   | COSTIM_up |
| SFSWAP   | COSTIM_up |
| GPBP1    | COSTIM_up |
| DGAT2    | COSTIM_up |
| CS       | COSTIM_up |
| MRPS24   | COSTIM_up |
| ELM02    | COSTIM_up |
| WAPL     | COSTIM_up |
| VMP1     | COSTIM_up |
| POLD1    | COSTIM_up |
| EIF4B    | COSTIM_up |
| RPL18    | COSTIM_up |
| ISOC2    | COSTIM_up |
| U2AF2    | COSTIM_up |
| EPN1     | COSTIM_up |
| AHRR     | COSTIM_up |
| RNF4     | COSTIM_up |
| INTS13   | COSTIM_up |
| TAF2     | COSTIM_up |
| TNP03    | COSTIM_up |
| RFXANK   | COSTIM_up |
| CTSA     | COSTIM_up |
| SUGP2    | COSTIM_up |
| DDX20    | COSTIM_up |
| BCAS1    | COSTIM_up |
| SBN02    | COSTIM_up |
| PMS1     | COSTIM_up |
| TAF11    | COSTIM_up |
| AP3D1    | COSTIM_up |
| UHRF1BP1 | COSTIM_up |
| GNAI3    | COSTIM_up |
| IP05     | COSTIM_up |
| WDR3     | COSTIM_up |
| WDR18    | COSTIM_up |
| MCM10    | COSTIM_up |
| KARS1    | COSTIM_up |
| PDIA5    | COSTIM_up |
| TBC1D22B | COSTIM_up |
| NDUFB4   | COSTIM_up |
| SPEN     | COSTIM_up |

|         |           |
|---------|-----------|
| ZC3H15  | COSTIM_up |
| SEC61A2 | COSTIM_up |
| MTHFD2  | COSTIM_up |
| SLC9A7  | COSTIM_up |
| YBX1    | COSTIM_up |
| ELAVL1  | COSTIM_up |
| SMARCD1 | COSTIM_up |
| NFYC    | COSTIM_up |
| SLC9A3  | COSTIM_up |
| CD84    | COSTIM_up |
| ELOVL1  | COSTIM_up |
| SPI1    | COSTIM_up |
| ZNRD1   | COSTIM_up |
| GOLGA5  | COSTIM_up |
| LRRC40  | COSTIM_up |
| ISOC1   | COSTIM_up |
| TRMT11  | COSTIM_up |
| MSANTD3 | COSTIM_up |
| ARFGEF1 | COSTIM_up |
| FECH    | COSTIM_up |
| PFKP    | COSTIM_up |
| IDI1    | COSTIM_up |
| KLF6    | COSTIM_up |
| PLPP1   | COSTIM_up |
| TRAM1   | COSTIM_up |
| PHKA1   | COSTIM_up |
| STOML1  | COSTIM_up |
| PKM     | COSTIM_up |
| DHX29   | COSTIM_up |
| DNTTIP2 | COSTIM_up |
| RRP15   | COSTIM_up |
| RHOA    | COSTIM_up |
| IARS2   | COSTIM_up |
| NAV3    | COSTIM_up |
| IDH3G   | COSTIM_up |
| HYAL2   | COSTIM_up |
| HDAC4   | COSTIM_up |
| COASY   | COSTIM_up |
| TFE3    | COSTIM_up |
| ACSL4   | COSTIM_up |
| GPKOW   | COSTIM_up |
| FTSJ1   | COSTIM_up |
| POLR1A  | COSTIM_up |
| TTC7A   | COSTIM_up |
| SRBD1   | COSTIM_up |
| KIF2A   | COSTIM_up |
| PSME4   | COSTIM_up |
| NUP133  | COSTIM_up |
| NUCKS1  | COSTIM_up |
| VPS35   | COSTIM_up |

|            |           |
|------------|-----------|
| DNAJA2     | COSTIM_up |
| KCNAB2     | COSTIM_up |
| FUNDC1     | COSTIM_up |
| ATP1B3     | COSTIM_up |
| MAPK6      | COSTIM_up |
| HDHD5      | COSTIM_up |
| UFD1       | COSTIM_up |
| PHRF1      | COSTIM_up |
| ELP1       | COSTIM_up |
| EXOC5      | COSTIM_up |
| RNF126     | COSTIM_up |
| JMJD6      | COSTIM_up |
| ASNS       | COSTIM_up |
| ST6GALNAC2 | COSTIM_up |
| PABPC1     | COSTIM_up |
| CFAP20     | COSTIM_up |
| CSNK2A2    | COSTIM_up |
| EIF2B3     | COSTIM_up |
| TCOF1      | COSTIM_up |
| CDC42      | COSTIM_up |
| SLC12A3    | COSTIM_up |
| RAD18      | COSTIM_up |
| NCK2       | COSTIM_up |
| RPL31      | COSTIM_up |
| WDR1       | COSTIM_up |
| ING3       | COSTIM_up |
| BUD23      | COSTIM_up |
| SEL1L      | COSTIM_up |
| TRIP13     | COSTIM_up |
| ATP6AP1    | COSTIM_up |
| TCF3       | COSTIM_up |
| DAZAP1     | COSTIM_up |
| MBD3       | COSTIM_up |
| FAM50A     | COSTIM_up |
| CPSF1      | COSTIM_up |
| PDCD2      | COSTIM_up |
| RDH11      | COSTIM_up |
| ZFYVE26    | COSTIM_up |
| TFRC       | COSTIM_up |
| SREBF1     | COSTIM_up |
| SMC1A      | COSTIM_up |
| HSD17B10   | COSTIM_up |
| HMMR       | COSTIM_up |
| CHFR       | COSTIM_up |
| TRNT1      | COSTIM_up |
| STK10      | COSTIM_up |
| FBXW11     | COSTIM_up |
| EVC        | COSTIM_up |
| DERL2      | COSTIM_up |
| NDE1       | COSTIM_up |

|         |           |
|---------|-----------|
| AP1M1   | COSTIM_up |
| PVR     | COSTIM_up |
| SCARB1  | COSTIM_up |
| MCM2    | COSTIM_up |
| TP63    | COSTIM_up |
| NLE1    | COSTIM_up |
| SMARCE1 | COSTIM_up |
| FERMT2  | COSTIM_up |
| NSF     | COSTIM_up |
| MRPS34  | COSTIM_up |
| CLNS1A  | COSTIM_up |
| EED     | COSTIM_up |
| TSG101  | COSTIM_up |
| MGLL    | COSTIM_up |
| BCS1L   | COSTIM_up |
| SLC24A1 | COSTIM_up |
| SCARF1  | COSTIM_up |
| LMAN1   | COSTIM_up |
| EN01    | COSTIM_up |
| MYDGF   | COSTIM_up |
| TUBE1   | COSTIM_up |
| TIPIN   | COSTIM_up |
| SRI     | COSTIM_up |
| EIF4G3  | COSTIM_up |
| NUP37   | COSTIM_up |
| TIMM21  | COSTIM_up |
| RASAL2  | COSTIM_up |
| VPS9D1  | COSTIM_up |
| SLC25A3 | COSTIM_up |
| FNDC3B  | COSTIM_up |
| FSCN1   | COSTIM_up |
| ACTB    | COSTIM_up |
| DLG1    | COSTIM_up |
| RAB7A   | COSTIM_up |
| SART3   | COSTIM_up |
| EXOSC7  | COSTIM_up |
| MKRN2   | COSTIM_up |
| MCM6    | COSTIM_up |
| REX02   | COSTIM_up |
| RBM7    | COSTIM_up |
| PTPN23  | COSTIM_up |
| MLH1    | COSTIM_up |
| SPAG5   | COSTIM_up |
| TRAF4   | COSTIM_up |
| XAB2    | COSTIM_up |
| MAP2K7  | COSTIM_up |
| TM9SF3  | COSTIM_up |
| NFKB2   | COSTIM_up |
| UBE2T   | COSTIM_up |
| GTF3C1  | COSTIM_up |

|          |           |
|----------|-----------|
| SNRPA    | COSTIM_up |
| EXOSC5   | COSTIM_up |
| DYNC1I2  | COSTIM_up |
| SIRT6    | COSTIM_up |
| CAPZB    | COSTIM_up |
| SLC25A43 | COSTIM_up |
| UBE2A    | COSTIM_up |
| ARAF     | COSTIM_up |
| LAMP3    | COSTIM_up |
| UBE2K    | COSTIM_up |
| TIGAR    | COSTIM_up |
| SYNJ2    | COSTIM_up |
| PMS2P1   | COSTIM_up |
| GNB1     | COSTIM_up |
| MLLT10   | COSTIM_up |
| NRDC     | COSTIM_up |
| VDAC3    | COSTIM_up |
| SDF4     | COSTIM_up |
| THOC1    | COSTIM_up |
| XRCC5    | COSTIM_up |
| REX01    | COSTIM_up |
| SAR1A    | COSTIM_up |
| SENP1    | COSTIM_up |
| FDFT1    | COSTIM_up |
| PAFAH1B3 | COSTIM_up |
| PGM1     | COSTIM_up |
| DDX1     | COSTIM_up |
| EPB41L2  | COSTIM_up |
| KEAP1    | COSTIM_up |
| RIF1     | COSTIM_up |
| RAB21    | COSTIM_up |
| SRCAP    | COSTIM_up |
| PUM3     | COSTIM_up |
| CNOT4    | COSTIM_up |
| CPOX     | COSTIM_up |
| CLDND1   | COSTIM_up |
| HSP90AA1 | COSTIM_up |
| PCNP     | COSTIM_up |
| UBA5     | COSTIM_up |
| JMJD4    | COSTIM_up |
| IL12RB2  | COSTIM_up |
| WDR70    | COSTIM_up |
| BZW1     | COSTIM_up |
| ME2      | COSTIM_up |
| C5orf22  | COSTIM_up |
| MRPL22   | COSTIM_up |
| GEMIN5   | COSTIM_up |
| NFE2L1   | COSTIM_up |
| GSK3B    | COSTIM_up |
| ITGB5    | COSTIM_up |

|          |           |
|----------|-----------|
| XP01     | COSTIM_up |
| PALB2    | COSTIM_up |
| LYRM2    | COSTIM_up |
| TNP01    | COSTIM_up |
| PL0D1    | COSTIM_up |
| DIS3     | COSTIM_up |
| PIBF1    | COSTIM_up |
| NUFIP1   | COSTIM_up |
| CYLD     | COSTIM_up |
| SLC27A5  | COSTIM_up |
| ZNF324   | COSTIM_up |
| RPS5     | COSTIM_up |
| CHMP2B   | COSTIM_up |
| PPIE     | COSTIM_up |
| ZMPSTE24 | COSTIM_up |
| STARD7   | COSTIM_up |
| GSTP1    | COSTIM_up |
| WBP11    | COSTIM_up |
| EIF3I    | COSTIM_up |
| TXLNA    | COSTIM_up |
| RAB10    | COSTIM_up |
| HADHA    | COSTIM_up |
| CAD      | COSTIM_up |
| CD59     | COSTIM_up |
| CD82     | COSTIM_up |
| AK6      | COSTIM_up |
| MECOM    | COSTIM_up |
| PREP     | COSTIM_up |
| SEH1L    | COSTIM_up |
| WDFY1    | COSTIM_up |
| AKR1B1   | COSTIM_up |
| RRN3     | COSTIM_up |
| CTTN     | COSTIM_up |
| MTIF2    | COSTIM_up |
| EPS15    | COSTIM_up |
| CHERP    | COSTIM_up |
| POMGNT1  | COSTIM_up |
| MAST2    | COSTIM_up |
| DNAJA1   | COSTIM_up |
| CHMP5    | COSTIM_up |
| NFX1     | COSTIM_up |
| DIMT1    | COSTIM_up |
| IP011    | COSTIM_up |
| EIF2AK1  | COSTIM_up |
| EPDR1    | COSTIM_up |
| SEPHS1   | COSTIM_up |
| MRPL28   | COSTIM_up |
| ITPKC    | COSTIM_up |
| RBM22    | COSTIM_up |
| TMED2    | COSTIM_up |

|          |           |
|----------|-----------|
| TXLNG    | COSTIM_up |
| LAT2     | COSTIM_up |
| HUWE1    | COSTIM_up |
| ZW10     | COSTIM_up |
| ALG9     | COSTIM_up |
| ACOX3    | COSTIM_up |
| MTMR2    | COSTIM_up |
| PPP1R15A | COSTIM_up |
| TRIP6    | COSTIM_up |
| ACHE     | COSTIM_up |
| FTL      | COSTIM_up |
| SRRT     | COSTIM_up |
| BAX      | COSTIM_up |
| ATXN7L3  | COSTIM_up |
| PSMC5    | COSTIM_up |
| OGFOD1   | COSTIM_up |
| SH3BP2   | COSTIM_up |
| NOP14    | COSTIM_up |
| ADD1     | COSTIM_up |
| L2HGDH   | COSTIM_up |
| RTRAF    | COSTIM_up |
| SF3B2    | COSTIM_up |
| KLHL42   | COSTIM_up |
| DNM1L    | COSTIM_up |
| ERGIC2   | COSTIM_up |
| PIR      | COSTIM_up |
| METTLL2A | COSTIM_up |
| CNOT3    | COSTIM_up |
| DDX18    | COSTIM_up |
| KHSRP    | COSTIM_up |
| TPX2     | COSTIM_up |
| PDRG1    | COSTIM_up |
| ANKRD10  | COSTIM_up |
| COQ9     | COSTIM_up |
| KIF9     | COSTIM_up |
| CRLS1    | COSTIM_up |
| ATRN     | COSTIM_up |
| FKBP1A   | COSTIM_up |
| NSFL1C   | COSTIM_up |
| ZNF343   | COSTIM_up |
| XRN2     | COSTIM_up |
| DYNLL1   | COSTIM_up |
| TESC     | COSTIM_up |
| SNX5     | COSTIM_up |
| RPL6     | COSTIM_up |
| MAPKAPK5 | COSTIM_up |
| P2RX7    | COSTIM_up |
| ESF1     | COSTIM_up |
| RBBP9    | COSTIM_up |
| ANAPC5   | COSTIM_up |



|           |           |
|-----------|-----------|
| SLC23A2   | COSTIM_up |
| TMEM230   | COSTIM_up |
| KDM2B     | COSTIM_up |
| GCN1      | COSTIM_up |
| RPLP0     | COSTIM_up |
| TRMT6     | COSTIM_up |
| PEBP1     | COSTIM_up |
| BRAP      | COSTIM_up |
| FUS       | COSTIM_up |
| CDIP1     | COSTIM_up |
| KCNH4     | COSTIM_up |
| GANAB     | COSTIM_up |
| MLF2      | COSTIM_up |
| DDX24     | COSTIM_up |
| DHX32     | COSTIM_up |
| GPATCH2L  | COSTIM_up |
| SLC9A1    | COSTIM_up |
| SPTLC1    | COSTIM_up |
| CCNK      | COSTIM_up |
| RGS1      | COSTIM_up |
| MRPS33    | COSTIM_up |
| NDUFB2    | COSTIM_up |
| NUDC      | COSTIM_up |
| MAEA      | COSTIM_up |
| ICAM1     | COSTIM_up |
| STRN4     | COSTIM_up |
| IRAK3     | COSTIM_up |
| MUL1      | COSTIM_up |
| TFAP4     | COSTIM_up |
| PDCD7     | COSTIM_up |
| DNAJB11   | COSTIM_up |
| RAB11FIP3 | COSTIM_up |
| GOLGA3    | COSTIM_up |
| PABPC4    | COSTIM_up |
| CERS4     | COSTIM_up |
| EFNB1     | COSTIM_up |
| AARS1     | COSTIM_up |
| RBM27     | COSTIM_up |
| PUS7      | COSTIM_up |
| DLD       | COSTIM_up |
| WDR7      | COSTIM_up |
| TXNL1     | COSTIM_up |
| CMTM6     | COSTIM_up |
| MAP3K20   | COSTIM_up |
| FH        | COSTIM_up |
| CDV3      | COSTIM_up |
| ALKBH5    | COSTIM_up |
| SPAG7     | COSTIM_up |
| ZC3HC1    | COSTIM_up |
| ESR1      | COSTIM_up |

TMEM101 COSTIM\_up  
PSME1 COSTIM\_up  
PPP2R3C COSTIM\_up  
JPH4 COSTIM\_up  
RNF31 COSTIM\_up  
SCFD1 COSTIM\_up  
HECTD1 COSTIM\_up  
HNRNPC COSTIM\_up  
SUPT16H COSTIM\_up  
TOX4 COSTIM\_up  
TGM1 COSTIM\_up  
TINF2 COSTIM\_up  
TRPM7 COSTIM\_up  
WDR76 COSTIM\_up  
TBX15 COSTIM\_up  
PHGDH COSTIM\_up  
MYL6 COSTIM\_up  
AG01 COSTIM\_up  
CLSPN COSTIM\_up  
RFFL COSTIM\_up  
NUP50 COSTIM\_up  
CDC45 COSTIM\_up  
COMT COSTIM\_up  
ECHDC1 COSTIM\_up  
LRRFIP2 COSTIM\_up  
XYLB COSTIM\_up  
HDAC6 COSTIM\_up  
CDC6 COSTIM\_up  
CDC23 COSTIM\_up  
AAAS COSTIM\_up  
CBX5 COSTIM\_up  
MSH2 COSTIM\_up  
DHPS COSTIM\_up  
ARCN1 COSTIM\_up  
EPB41L4B COSTIM\_up  
TMEM38B COSTIM\_up  
PSMD5 COSTIM\_up  
NUP188 COSTIM\_up  
NANS COSTIM\_up  
BTAF1 COSTIM\_up  
WAC COSTIM\_up  
NUBP2 COSTIM\_up  
HIVEP1 COSTIM\_up  
FKBP5 COSTIM\_up  
SRPK1 COSTIM\_up  
BRPF3 COSTIM\_up  
MRPS18A COSTIM\_up  
HSP90AB1 COSTIM\_up  
CDC5L COSTIM\_up  
HNRNPH3 COSTIM\_up

|         |           |
|---------|-----------|
| ABL1    | COSTIM_up |
| ACOT7   | COSTIM_up |
| SH3GLB1 | COSTIM_up |
| CDC7    | COSTIM_up |
| SCD     | COSTIM_up |
| TMED1   | COSTIM_up |
| WASHC2A | COSTIM_up |
| PSMD8   | COSTIM_up |
| FBXL19  | COSTIM_up |
| SETD1A  | COSTIM_up |
| BCL7C   | COSTIM_up |
| ATP5F1D | COSTIM_up |
| IGFALS  | COSTIM_up |
| HNRNPM  | COSTIM_up |
| NDUFB7  | COSTIM_up |
| TIMM13  | COSTIM_up |
| CDC34   | COSTIM_up |
| MTAP    | COSTIM_up |
| CEP170B | COSTIM_up |
| POLR2E  | COSTIM_up |
| POLRMT  | COSTIM_up |
| IZUM04  | COSTIM_up |
| GADD45B | COSTIM_up |
| MKNK2   | COSTIM_up |
| TRMT2A  | COSTIM_up |
| RANBP1  | COSTIM_up |
| ZDHHC8  | COSTIM_up |
| MED15   | COSTIM_up |
| SNAP29  | COSTIM_up |
| CRKL    | COSTIM_up |
| LZTR1   | COSTIM_up |
| SMARCB1 | COSTIM_up |
| BCL2L13 | COSTIM_up |
| DDT     | COSTIM_up |
| SF3A1   | COSTIM_up |
| SPECC1L | COSTIM_up |
| SNRPD3  | COSTIM_up |
| PES1    | COSTIM_up |
| PPM1F   | COSTIM_up |
| MFNG    | COSTIM_up |
| GGA1    | COSTIM_up |
| HIRA    | COSTIM_up |
| SH3BP1  | COSTIM_up |
| LGALS1  | COSTIM_up |
| SRRD    | COSTIM_up |
| TFIP11  | COSTIM_up |
| ANKRD54 | COSTIM_up |
| EIF3L   | COSTIM_up |
| SNU13   | COSTIM_up |
| MICALL1 | COSTIM_up |

|          |           |
|----------|-----------|
| POLR2F   | COSTIM_up |
| TCF20    | COSTIM_up |
| TOMM22   | COSTIM_up |
| XBP1     | COSTIM_up |
| RTCB     | COSTIM_up |
| POLDIP3  | COSTIM_up |
| CYB5R3   | COSTIM_up |
| RHBDD3   | COSTIM_up |
| AP1B1    | COSTIM_up |
| HMGXB4   | COSTIM_up |
| MCAT     | COSTIM_up |
| THOC5    | COSTIM_up |
| TLL12    | COSTIM_up |
| RPL3     | COSTIM_up |
| ZMAT5    | COSTIM_up |
| ASCC2    | COSTIM_up |
| MIEF1    | COSTIM_up |
| MYH9     | COSTIM_up |
| SAMM50   | COSTIM_up |
| TXN2     | COSTIM_up |
| FOXRED2  | COSTIM_up |
| EIF3D    | COSTIM_up |
| CSF2RB   | COSTIM_up |
| SLC25A17 | COSTIM_up |
| ST13     | COSTIM_up |
| RBX1     | COSTIM_up |
| L3MBTL2  | COSTIM_up |
| RANGAP1  | COSTIM_up |
| ZC3H7B   | COSTIM_up |
| PHF5A    | COSTIM_up |
| AC02     | COSTIM_up |
| POLR3H   | COSTIM_up |
| TRMU     | COSTIM_up |
| DESI1    | COSTIM_up |
| BRD1     | COSTIM_up |
| ZBED4    | COSTIM_up |
| KHNYN    | COSTIM_up |
| FKBP3    | COSTIM_up |
| PRMT5    | COSTIM_up |
| TRIM9    | COSTIM_up |
| PSMC6    | COSTIM_up |
| GNPNAT1  | COSTIM_up |
| DDHD1    | COSTIM_up |
| CNIH1    | COSTIM_up |
| PSMA3    | COSTIM_up |
| VTI1B    | COSTIM_up |
| TIMM9    | COSTIM_up |
| AHSA1    | COSTIM_up |
| SNW1     | COSTIM_up |
| ITPK1    | COSTIM_up |

|          |           |
|----------|-----------|
| DHRS7    | COSTIM_up |
| PPM1A    | COSTIM_up |
| CEP128   | COSTIM_up |
| ERH      | COSTIM_up |
| SUSD6    | COSTIM_up |
| EIF5     | COSTIM_up |
| ZFYVE21  | COSTIM_up |
| MTHFD1   | COSTIM_up |
| TEL02    | COSTIM_up |
| GSKIP    | COSTIM_up |
| PSMC1    | COSTIM_up |
| PPP4R3A  | COSTIM_up |
| PSMB5    | COSTIM_up |
| YY1      | COSTIM_up |
| ACIN1    | COSTIM_up |
| CCNB1IP1 | COSTIM_up |
| APEX1    | COSTIM_up |
| PABPN1   | COSTIM_up |
| CINP     | COSTIM_up |
| SRP54    | COSTIM_up |
| PCK2     | COSTIM_up |
| PRORP    | COSTIM_up |
| PSMA6    | COSTIM_up |
| NFKBIA   | COSTIM_up |
| EMC9     | COSTIM_up |
| PSME2    | COSTIM_up |
| BRMS1L   | COSTIM_up |
| TM9SF1   | COSTIM_up |
| SEC23A   | COSTIM_up |
| PNN      | COSTIM_up |
| RABGGTA  | COSTIM_up |
| PLTP     | COSTIM_up |
| GSS      | COSTIM_up |
| TRPC4AP  | COSTIM_up |
| GINS1    | COSTIM_up |
| CD40     | COSTIM_up |
| UQCC1    | COSTIM_up |
| RAB5IF   | COSTIM_up |
| NFATC2   | COSTIM_up |
| PFDN4    | COSTIM_up |
| CSTF1    | COSTIM_up |
| RAE1     | COSTIM_up |
| TPD52L2  | COSTIM_up |
| DNAJC5   | COSTIM_up |
| NELFCD   | COSTIM_up |
| PRPF6    | COSTIM_up |
| PRELID3B | COSTIM_up |
| MTG2     | COSTIM_up |
| PSMA7    | COSTIM_up |
| MRGBP    | COSTIM_up |

|          |           |
|----------|-----------|
| TCFL5    | COSTIM_up |
| GID8     | COSTIM_up |
| SLC17A9  | COSTIM_up |
| ARFGAP1  | COSTIM_up |
| C20orf27 | COSTIM_up |
| ARFRP1   | COSTIM_up |
| NDUFAF5  | COSTIM_up |
| TRIB3    | COSTIM_up |
| RASSF2   | COSTIM_up |
| CSNK2A1  | COSTIM_up |
| HM13     | COSTIM_up |
| SIRPB1   | COSTIM_up |
| SEC23B   | COSTIM_up |
| TM9SF4   | COSTIM_up |
| CRNKL1   | COSTIM_up |
| POFUT1   | COSTIM_up |
| KIF3B    | COSTIM_up |
| NOP56    | COSTIM_up |
| MANBAL   | COSTIM_up |
| IDH3B    | COSTIM_up |
| MAPRE1   | COSTIM_up |
| JAG1     | COSTIM_up |
| CDK5RAP1 | COSTIM_up |
| TTI1     | COSTIM_up |
| E2F1     | COSTIM_up |
| RPRD1B   | COSTIM_up |
| CHMP4B   | COSTIM_up |
| ASIP     | COSTIM_up |
| ACTR5    | COSTIM_up |
| AHCY     | COSTIM_up |
| DHX35    | COSTIM_up |
| DNTTIP1  | COSTIM_up |
| PIGU     | COSTIM_up |
| APMAP    | COSTIM_up |
| ADNP2    | COSTIM_up |
| RBFA     | COSTIM_up |
| USP14    | COSTIM_up |
| VAPA     | COSTIM_up |
| RNMT     | COSTIM_up |
| MIB1     | COSTIM_up |
| RBBP8    | COSTIM_up |
| RIOK3    | COSTIM_up |
| CSTF2    | COSTIM_up |
| PSMD10   | COSTIM_up |
| PGRMC1   | COSTIM_up |
| POLA1    | COSTIM_up |
| NKAP     | COSTIM_up |
| NXT2     | COSTIM_up |
| MCTS2P   | COSTIM_up |
| PRPS2    | COSTIM_up |

|          |           |
|----------|-----------|
| SUV39H1  | COSTIM_up |
| XIAP     | COSTIM_up |
| CCDC22   | COSTIM_up |
| NAA10    | COSTIM_up |
| RENBP    | COSTIM_up |
| PIM2     | COSTIM_up |
| PQBP1    | COSTIM_up |
| EMD      | COSTIM_up |
| PGK1     | COSTIM_up |
| MAGT1    | COSTIM_up |
| SMS      | COSTIM_up |
| EEA1     | COSTIM_up |
| JADE3    | COSTIM_up |
| CDK16    | COSTIM_up |
| HTATSF1  | COSTIM_up |
| RBM3     | COSTIM_up |
| PBDC1    | COSTIM_up |
| GLA      | COSTIM_up |
| ARMCX3   | COSTIM_up |
| NDFIP2   | COSTIM_up |
| DNAJC3   | COSTIM_up |
| ARHGEF7  | COSTIM_up |
| MRPS31   | COSTIM_up |
| SLC25A15 | COSTIM_up |
| KPNA3    | COSTIM_up |
| VWA8     | COSTIM_up |
| INTS6    | COSTIM_up |
| MGRN1    | COSTIM_up |
| TRADD    | COSTIM_up |
| HSF4     | COSTIM_up |
| LYRM1    | COSTIM_up |
| NUTF2    | COSTIM_up |
| NUP93    | COSTIM_up |
| CCL22    | COSTIM_up |
| DHODH    | COSTIM_up |
| CCL17    | COSTIM_up |
| ACD      | COSTIM_up |
| POLR2C   | COSTIM_up |
| USB1     | COSTIM_up |
| CYB5B    | COSTIM_up |
| NME3     | COSTIM_up |
| NDRG4    | COSTIM_up |
| PSMD7    | COSTIM_up |
| SETD6    | COSTIM_up |
| SLC38A7  | COSTIM_up |
| VAC14    | COSTIM_up |
| MON1B    | COSTIM_up |
| CMC2     | COSTIM_up |
| AXIN1    | COSTIM_up |
| NPRL3    | COSTIM_up |

|          |           |
|----------|-----------|
| TAF1C    | COSTIM_up |
| USP10    | COSTIM_up |
| ABCC1    | COSTIM_up |
| NOM03    | COSTIM_up |
| CLCN7    | COSTIM_up |
| HAGHL    | COSTIM_up |
| ANTKMT   | COSTIM_up |
| SLC7A5   | COSTIM_up |
| STUB1    | COSTIM_up |
| NUBP1    | COSTIM_up |
| UBE2I    | COSTIM_up |
| EEF2K    | COSTIM_up |
| CAPN15   | COSTIM_up |
| PIEZ01   | COSTIM_up |
| GSPT1    | COSTIM_up |
| UBFD1    | COSTIM_up |
| EARS2    | COSTIM_up |
| ELOB     | COSTIM_up |
| USP31    | COSTIM_up |
| HMOX2    | COSTIM_up |
| DNAJA3   | COSTIM_up |
| BFAR     | COSTIM_up |
| RRN3P2   | COSTIM_up |
| RPGRIP1L | COSTIM_up |
| MAZ      | COSTIM_up |
| STX4     | COSTIM_up |
| BCKDK    | COSTIM_up |
| KAT8     | COSTIM_up |
| NOM01    | COSTIM_up |
| IL21R    | COSTIM_up |
| VPS35L   | COSTIM_up |
| RNF40    | COSTIM_up |
| KNOP1    | COSTIM_up |
| AAGAB    | COSTIM_up |
| LACTB    | COSTIM_up |
| CSK      | COSTIM_up |
| TRIP4    | COSTIM_up |
| RAB11A   | COSTIM_up |
| CTSH     | COSTIM_up |
| FAH      | COSTIM_up |
| RPAP1    | COSTIM_up |
| EHD4     | COSTIM_up |
| ZNF106   | COSTIM_up |
| ATP8B4   | COSTIM_up |
| GABPB1   | COSTIM_up |
| DNAJC17  | COSTIM_up |
| EIF3J    | COSTIM_up |
| VPS18    | COSTIM_up |
| CSPP1    | COSTIM_up |
| BRF2     | COSTIM_up |



|           |           |
|-----------|-----------|
| CA2       | COSTIM_up |
| INTS9     | COSTIM_up |
| RIPK2     | COSTIM_up |
| NBN       | COSTIM_up |
| TRPA1     | COSTIM_up |
| IMPAD1    | COSTIM_up |
| LAPTM4B   | COSTIM_up |
| POP1      | COSTIM_up |
| JPH1      | COSTIM_up |
| STK3      | COSTIM_up |
| GDAP1     | COSTIM_up |
| RAB2A     | COSTIM_up |
| EIF3E     | COSTIM_up |
| EMC2      | COSTIM_up |
| IL7       | COSTIM_up |
| ARMC1     | COSTIM_up |
| CHRAC1    | COSTIM_up |
| SNX16     | COSTIM_up |
| UBR5      | COSTIM_up |
| TSTA3     | COSTIM_up |
| PYCR3     | COSTIM_up |
| EEF1D     | COSTIM_up |
| SQLE      | COSTIM_up |
| SLC39A14  | COSTIM_up |
| MTMR9     | COSTIM_up |
| LEPROTL1  | COSTIM_up |
| DCTN6     | COSTIM_up |
| R3HCC1    | COSTIM_up |
| GSR       | COSTIM_up |
| TNFRSF10A | COSTIM_up |
| UBXN8     | COSTIM_up |
| PPP2CB    | COSTIM_up |
| KLHDC4    | COSTIM_up |
| MCM4      | COSTIM_up |
| MAN2B1    | COSTIM_up |
| KCNN4     | COSTIM_up |
| HNRNPL    | COSTIM_up |
| NFKBIB    | COSTIM_up |
| SARS2     | COSTIM_up |
| SNRNP70   | COSTIM_up |
| CLPTM1    | COSTIM_up |
| RELB      | COSTIM_up |
| PPP1R37   | COSTIM_up |
| ERCC2     | COSTIM_up |
| DOT1L     | COSTIM_up |
| PLEKHJ1   | COSTIM_up |
| RNASEH2A  | COSTIM_up |
| SF3A2     | COSTIM_up |
| OAZ1      | COSTIM_up |
| TRMT1     | COSTIM_up |

|          |           |
|----------|-----------|
| RSPH6A   | COSTIM_up |
| TBC1D17  | COSTIM_up |
| IL4I1    | COSTIM_up |
| PTOV1    | COSTIM_up |
| SGTA     | COSTIM_up |
| C19orf53 | COSTIM_up |
| TIMM44   | COSTIM_up |
| FAM32A   | COSTIM_up |
| PPP6R1   | COSTIM_up |
| MED26    | COSTIM_up |
| AKAP8    | COSTIM_up |
| ILVBL    | COSTIM_up |
| POP4     | COSTIM_up |
| CCNE1    | COSTIM_up |
| URI1     | COSTIM_up |
| PDCD5    | COSTIM_up |
| ANKRD27  | COSTIM_up |
| RPS16    | COSTIM_up |
| TIMM50   | COSTIM_up |
| FBL      | COSTIM_up |
| GPI      | COSTIM_up |
| PIAS4    | COSTIM_up |
| EBI3     | COSTIM_up |
| YJU2     | COSTIM_up |
| TBCB     | COSTIM_up |
| POLR2I   | COSTIM_up |
| SLC1A5   | COSTIM_up |
| CACTIN   | COSTIM_up |
| CCDC9    | COSTIM_up |
| HNRNPUL1 | COSTIM_up |
| TGFB1    | COSTIM_up |
| DMAC2    | COSTIM_up |
| MRPL4    | COSTIM_up |
| RPS19    | COSTIM_up |
| BABAM1   | COSTIM_up |
| TYK2     | COSTIM_up |
| CDC37    | COSTIM_up |
| NAPA     | COSTIM_up |
| MEGF8    | COSTIM_up |
| GRWD1    | COSTIM_up |
| PLA2G4C  | COSTIM_up |
| TMEM205  | COSTIM_up |
| BCAT2    | COSTIM_up |
| MIER2    | COSTIM_up |
| PPP2R1A  | COSTIM_up |
| TNP02    | COSTIM_up |
| WDR830S  | COSTIM_up |
| GCDH     | COSTIM_up |
| PRPF31   | COSTIM_up |
| TFPT     | COSTIM_up |

|         |           |
|---------|-----------|
| JAK3    | COSTIM_up |
| RPL18A  | COSTIM_up |
| KCNN1   | COSTIM_up |
| PIK3R2  | COSTIM_up |
| ELL     | COSTIM_up |
| COPE    | COSTIM_up |
| DDX49   | COSTIM_up |
| ARMC6   | COSTIM_up |
| TMEM147 | COSTIM_up |
| KXD1    | COSTIM_up |
| SUGP1   | COSTIM_up |
| PBX4    | COSTIM_up |
| GSK3A   | COSTIM_up |
| ATP13A1 | COSTIM_up |
| ZNF574  | COSTIM_up |
| SMG9    | COSTIM_up |
| CDK6    | COSTIM_up |
| PMPCB   | COSTIM_up |
| DNAJC2  | COSTIM_up |
| TFPI2   | COSTIM_up |
| NAMPT   | COSTIM_up |
| TWISTNB | COSTIM_up |
| WDR91   | COSTIM_up |
| CBLL1   | COSTIM_up |
| MTPN    | COSTIM_up |
| STEAP1B | COSTIM_up |
| TTC26   | COSTIM_up |
| OGDH    | COSTIM_up |
| TFEC    | COSTIM_up |
| CAV1    | COSTIM_up |
| MET     | COSTIM_up |
| DNAJB6  | COSTIM_up |
| SSBP1   | COSTIM_up |
| GARS1   | COSTIM_up |
| CHCHD2  | COSTIM_up |
| HSPB1   | COSTIM_up |
| PDAP1   | COSTIM_up |
| BUD31   | COSTIM_up |
| PTCD1   | COSTIM_up |
| EIF3B   | COSTIM_up |
| SNX8    | COSTIM_up |
| TAF6    | COSTIM_up |
| AIMP2   | COSTIM_up |
| RBM28   | COSTIM_up |
| USP42   | COSTIM_up |
| LSM5    | COSTIM_up |
| AP1S1   | COSTIM_up |
| ZNHIT1  | COSTIM_up |
| PHF14   | COSTIM_up |
| EZH2    | COSTIM_up |

|          |           |
|----------|-----------|
| MEST     | COSTIM_up |
| MEOX2    | COSTIM_up |
| AHR      | COSTIM_up |
| CHCHD3   | COSTIM_up |
| PSMA2    | COSTIM_up |
| MRPL32   | COSTIM_up |
| BLVRA    | COSTIM_up |
| URGCP    | COSTIM_up |
| TMEM248  | COSTIM_up |
| RHEB     | COSTIM_up |
| POLD2    | COSTIM_up |
| BCL7B    | COSTIM_up |
| YKT6     | COSTIM_up |
| TBL2     | COSTIM_up |
| CLIP2    | COSTIM_up |
| EIF4H    | COSTIM_up |
| FSD1L    | COSTIM_up |
| TGFBR1   | COSTIM_up |
| SEC61B   | COSTIM_up |
| OGN      | COSTIM_up |
| ECM2     | COSTIM_up |
| SUSD1    | COSTIM_up |
| CDC37L1  | COSTIM_up |
| PLGRKT   | COSTIM_up |
| NCS1     | COSTIM_up |
| FUBP3    | COSTIM_up |
| CREB3    | COSTIM_up |
| EDF1     | COSTIM_up |
| PIP5K1B  | COSTIM_up |
| BAG1     | COSTIM_up |
| RAPGEF1  | COSTIM_up |
| EXOSC3   | COSTIM_up |
| ZFAND5   | COSTIM_up |
| DVL1     | COSTIM_up |
| CCNJ     | COSTIM_up |
| RASSF4   | COSTIM_up |
| ERLIN1   | COSTIM_up |
| EIF3A    | COSTIM_up |
| TRDMT1   | COSTIM_up |
| DDX50    | COSTIM_up |
| MAPK8    | COSTIM_up |
| SEC23IP  | COSTIM_up |
| NSMCE4A  | COSTIM_up |
| MICU1    | COSTIM_up |
| CCSER2   | COSTIM_up |
| TWNK     | COSTIM_up |
| NPM3     | COSTIM_up |
| GBF1     | COSTIM_up |
| ARHGAP21 | COSTIM_up |
| FBXL15   | COSTIM_up |

|          |           |
|----------|-----------|
| CUEDC2   | COSTIM_up |
| LARP4B   | COSTIM_up |
| GTPBP4   | COSTIM_up |
| BCCIP    | COSTIM_up |
| MTPAP    | COSTIM_up |
| PITRM1   | COSTIM_up |
| STN1     | COSTIM_up |
| MAP3K8   | COSTIM_up |
| GLRX3    | COSTIM_up |
| TASOR2   | COSTIM_up |
| XPNPEP1  | COSTIM_up |
| SMC3     | COSTIM_up |
| TFAM     | COSTIM_up |
| CCDC6    | COSTIM_up |
| CUL2     | COSTIM_up |
| CCNY     | COSTIM_up |
| UBE2S    | COSTIM_up |
| RPL28    | COSTIM_up |
| ZMIZ1    | COSTIM_up |
| PPIF     | COSTIM_up |
| NUFIP2   | COSTIM_up |
| RPL19    | COSTIM_up |
| UBTF     | COSTIM_up |
| PSMD3    | COSTIM_up |
| CASC3    | COSTIM_up |
| RAD51C   | COSTIM_up |
| MTMR4    | COSTIM_up |
| DHX40    | COSTIM_up |
| KPNB1    | COSTIM_up |
| PNPO     | COSTIM_up |
| CBX1     | COSTIM_up |
| INTS2    | COSTIM_up |
| CAMTA2   | COSTIM_up |
| ENO3     | COSTIM_up |
| PFN1     | COSTIM_up |
| RNF167   | COSTIM_up |
| SLC25A11 | COSTIM_up |
| C1QBP    | COSTIM_up |
| BLMH     | COSTIM_up |
| GOSR1    | COSTIM_up |
| CCDC47   | COSTIM_up |
| DRG2     | COSTIM_up |
| FTSJ3    | COSTIM_up |
| SMARCD2  | COSTIM_up |
| SYNGR2   | COSTIM_up |
| UTP6     | COSTIM_up |
| C17orf75 | COSTIM_up |
| CYTH1    | COSTIM_up |
| PSMD11   | COSTIM_up |
| CCL2     | COSTIM_up |

|         |           |
|---------|-----------|
| PEX12   | COSTIM_up |
| KAT2A   | COSTIM_up |
| RAB5C   | COSTIM_up |
| MLX     | COSTIM_up |
| CNTNAP1 | COSTIM_up |
| PPP1R9B | COSTIM_up |
| MRPL27  | COSTIM_up |
| LRRRC59 | COSTIM_up |
| EFTUD2  | COSTIM_up |
| SLC16A6 | COSTIM_up |
| YWHAE   | COSTIM_up |
| MMD     | COSTIM_up |
| RANGRF  | COSTIM_up |
| DHRS7B  | COSTIM_up |
| NAT9    | COSTIM_up |
| TMEM104 | COSTIM_up |
| TMEM97  | COSTIM_up |
| UNC119  | COSTIM_up |
| SUPT6H  | COSTIM_up |
| RAB34   | COSTIM_up |
| TMEM33  | COSTIM_up |
| SLAIN2  | COSTIM_up |
| OCIAD1  | COSTIM_up |
| USP46   | COSTIM_up |
| CRACD   | COSTIM_up |
| LAMTOR3 | COSTIM_up |
| NFKB1   | COSTIM_up |
| UBE2D3  | COSTIM_up |
| NDUFC1  | COSTIM_up |
| ZNF330  | COSTIM_up |
| GRPEL1  | COSTIM_up |
| GAR1    | COSTIM_up |
| CLCN3   | COSTIM_up |
| DHX15   | COSTIM_up |
| FBXW7   | COSTIM_up |
| NSD2    | COSTIM_up |
| SH3D19  | COSTIM_up |
| MFSD10  | COSTIM_up |
| UFSP2   | COSTIM_up |
| UGDH    | COSTIM_up |
| HTATIP2 | COSTIM_up |
| CTSC    | COSTIM_up |
| ZPR1    | COSTIM_up |
| MTCH2   | COSTIM_up |
| HSPA8   | COSTIM_up |
| LPXN    | COSTIM_up |
| DTX4    | COSTIM_up |
| EHD1    | COSTIM_up |
| OSBP    | COSTIM_up |
| PUS3    | COSTIM_up |

|          |           |
|----------|-----------|
| DCPS     | COSTIM_up |
| FOXRED1  | COSTIM_up |
| CCND1    | COSTIM_up |
| CCDC86   | COSTIM_up |
| PRPF19   | COSTIM_up |
| TMEM109  | COSTIM_up |
| CHORDC1  | COSTIM_up |
| ANAPC15  | COSTIM_up |
| PANX1    | COSTIM_up |
| CEP164   | COSTIM_up |
| EIF4G2   | COSTIM_up |
| UBE4A    | COSTIM_up |
| DDX6     | COSTIM_up |
| NECTIN1  | COSTIM_up |
| PDHX     | COSTIM_up |
| COMMD9   | COSTIM_up |
| AMBRA1   | COSTIM_up |
| PTPMT1   | COSTIM_up |
| CARS1    | COSTIM_up |
| SLC35F2  | COSTIM_up |
| C11orf58 | COSTIM_up |
| RPS13    | COSTIM_up |
| AIP      | COSTIM_up |
| NUP98    | COSTIM_up |
| NDUFS8   | COSTIM_up |
| CHKA     | COSTIM_up |
| HPS5     | COSTIM_up |
| GTF2H1   | COSTIM_up |
| POU2AF1  | COSTIM_up |
| PSMD9    | COSTIM_up |
| PRPF40B  | COSTIM_up |
| COQ5     | COSTIM_up |
| KCTD10   | COSTIM_up |
| MLEC     | COSTIM_up |
| MVK      | COSTIM_up |
| CAMKK2   | COSTIM_up |
| ATP5F1B  | COSTIM_up |
| PTGES3   | COSTIM_up |
| BCL7A    | COSTIM_up |
| RSRC2    | COSTIM_up |
| CYP27B1  | COSTIM_up |
| METAP2   | COSTIM_up |
| WNT5B    | COSTIM_up |
| MAG0HB   | COSTIM_up |
| PRR4     | COSTIM_up |
| ARPC3    | COSTIM_up |
| GPN3     | COSTIM_up |
| VPS29    | COSTIM_up |
| SH2B3    | COSTIM_up |
| NAA25    | COSTIM_up |

|           |           |
|-----------|-----------|
| OGF0D2    | COSTIM_up |
| CDK2AP1   | COSTIM_up |
| OAS3      | COSTIM_up |
| GTF2H3    | COSTIM_up |
| EIF2B1    | COSTIM_up |
| DDX55     | COSTIM_up |
| SLC38A1   | COSTIM_up |
| C12orf49  | COSTIM_up |
| VDR       | COSTIM_up |
| COPZ1     | COSTIM_up |
| CAND1     | COSTIM_up |
| NUP107    | COSTIM_up |
| CN0T2     | COSTIM_up |
| CPSF6     | COSTIM_up |
| KRR1      | COSTIM_up |
| MRPL51    | COSTIM_up |
| GAPDH     | COSTIM_up |
| NOP2      | COSTIM_up |
| UHRF1BP1L | COSTIM_up |
| COPS7A    | COSTIM_up |
| USP5      | COSTIM_up |
| TPI1      | COSTIM_up |
| SPSB2     | COSTIM_up |
| ATN1      | COSTIM_up |
| NT5DC3    | COSTIM_up |
| GOLT1B    | COSTIM_up |
| LDHB      | COSTIM_up |
| CMAS      | COSTIM_up |
| AICDA     | COSTIM_up |
| RAB35     | COSTIM_up |
| COX6A1    | COSTIM_up |
| SRSF9     | COSTIM_up |
| DSE       | COSTIM_up |
| RWDD1     | COSTIM_up |
| PAK1IP1   | COSTIM_up |
| RNGTT     | COSTIM_up |
| HDDC2     | COSTIM_up |
| HINT3     | COSTIM_up |
| UST       | COSTIM_up |
| ULBP1     | COSTIM_up |
| MTRF1L    | COSTIM_up |
| KCTD20    | COSTIM_up |
| SRSF3     | COSTIM_up |
| SOD2      | COSTIM_up |
| MRPL18    | COSTIM_up |
| MCM3      | COSTIM_up |
| RNF8      | COSTIM_up |
| PHACTR1   | COSTIM_up |
| CD83      | COSTIM_up |
| MDN1      | COSTIM_up |



|         |           |
|---------|-----------|
| BAG2    | COSTIM_up |
| CCNC    | COSTIM_up |
| E2F3    | COSTIM_up |
| PTP4A1  | COSTIM_up |
| ASCC3   | COSTIM_up |
| ACOT13  | COSTIM_up |
| SMAP1   | COSTIM_up |
| RPS12   | COSTIM_up |
| C6orf62 | COSTIM_up |
| GMNN    | COSTIM_up |
| SNX3    | COSTIM_up |
| HBS1L   | COSTIM_up |
| PEX7    | COSTIM_up |
| ZBTB24  | COSTIM_up |
| ARFGEF3 | COSTIM_up |
| EPM2A   | COSTIM_up |
| SLC39A7 | COSTIM_up |
| CUTA    | COSTIM_up |
| QKI     | COSTIM_up |
| TFEB    | COSTIM_up |
| BYSL    | COSTIM_up |
| TBP     | COSTIM_up |
| PPP2R5D | COSTIM_up |
| MRPL2   | COSTIM_up |
| SRF     | COSTIM_up |
| DNPH1   | COSTIM_up |
| DUSP22  | COSTIM_up |
| EXOC2   | COSTIM_up |
| COX7A2  | COSTIM_up |
| TMEM30A | COSTIM_up |
| GMDS    | COSTIM_up |
| VEGFA   | COSTIM_up |
| PRPF4B  | COSTIM_up |
| SLC29A1 | COSTIM_up |
| FBRSL1  | COSTIM_up |
| NUDT12  | COSTIM_up |
| HMGCS1  | COSTIM_up |
| DAP     | COSTIM_up |
| MRPS30  | COSTIM_up |
| HSPA9   | COSTIM_up |
| MRPS27  | COSTIM_up |
| PFDN1   | COSTIM_up |
| SLC4A9  | COSTIM_up |
| LOX     | COSTIM_up |
| IK      | COSTIM_up |
| HMGCR   | COSTIM_up |
| THG1L   | COSTIM_up |
| ARSB    | COSTIM_up |
| CLINT1  | COSTIM_up |
| CNOT6   | COSTIM_up |

|           |           |
|-----------|-----------|
| TTC1      | COSTIM_up |
| POLR3G    | COSTIM_up |
| DROSHA    | COSTIM_up |
| LMNB1     | COSTIM_up |
| GOLPH3    | COSTIM_up |
| SUB1      | COSTIM_up |
| TARS1     | COSTIM_up |
| RAD1      | COSTIM_up |
| BRIX1     | COSTIM_up |
| PRLR      | COSTIM_up |
| RAD50     | COSTIM_up |
| ST8SIA4   | COSTIM_up |
| GNPDA1    | COSTIM_up |
| SKP1      | COSTIM_up |
| NUP155    | COSTIM_up |
| PPP2CA    | COSTIM_up |
| TRAPPC13  | COSTIM_up |
| SEC24A    | COSTIM_up |
| TXNDC15   | COSTIM_up |
| RARS1     | COSTIM_up |
| MACROH2A1 | COSTIM_up |
| TCERG1    | COSTIM_up |
| CSNK1A1   | COSTIM_up |
| HMGXB3    | COSTIM_up |
| ATP6V0E1  | COSTIM_up |
| BNIP1     | COSTIM_up |
| SELENOK   | COSTIM_up |
| TIMMDC1   | COSTIM_up |
| CD86      | COSTIM_up |
| NIT2      | COSTIM_up |
| FAM162A   | COSTIM_up |
| KPNA1     | COSTIM_up |
| PCCB      | COSTIM_up |
| UBE3A     | COSTIM_up |
| ARMC8     | COSTIM_up |
| RNF7      | COSTIM_up |
| COL7A1    | COSTIM_up |
| PRKAR2A   | COSTIM_up |
| HES1      | COSTIM_up |
| USP4      | COSTIM_up |
| TFG       | COSTIM_up |
| TUSC2     | COSTIM_up |
| RPL24     | COSTIM_up |
| C3orf14   | COSTIM_up |
| FXR1      | COSTIM_up |
| GBE1      | COSTIM_up |
| UMPS      | COSTIM_up |
| NCBP2     | COSTIM_up |
| SNX4      | COSTIM_up |
| PLXNA1    | COSTIM_up |

ATP6V1A COSTIM\_up  
PODXL2 COSTIM\_up  
KLHL18 COSTIM\_up  
SCAP COSTIM\_up  
MRPL3 COSTIM\_up  
MAPKAPK3 COSTIM\_up  
COMMD2 COSTIM\_up  
RRP9 COSTIM\_up  
EIF1B COSTIM\_up  
ABHD14A-ACY1 COSTIM\_up  
SSR3 COSTIM\_up  
FOXP1 COSTIM\_up  
EIF4G1 COSTIM\_up  
SPCS1 COSTIM\_up  
NEK4 COSTIM\_up  
IN080D COSTIM\_up  
EEF1B2 COSTIM\_up  
DGUOK COSTIM\_up  
MOB1A COSTIM\_up  
IL1A COSTIM\_up  
FAHD2A COSTIM\_up  
NCL COSTIM\_up  
ACTR1B COSTIM\_up  
ACTR3 COSTIM\_up  
SF3B6 COSTIM\_up  
MPV17 COSTIM\_up  
GTF3C2 COSTIM\_up  
EIF2B4 COSTIM\_up  
NRBP1 COSTIM\_up  
PSMD14 COSTIM\_up  
SNX17 COSTIM\_up  
PPM1G COSTIM\_up  
IFIH1 COSTIM\_up  
RPS15 COSTIM\_up  
IN080B COSTIM\_up  
MOGS COSTIM\_up  
NDUFS7 COSTIM\_up  
PCGF1 COSTIM\_up  
AUP1 COSTIM\_up  
HTRA2 COSTIM\_up  
LOXL3 COSTIM\_up  
POLE4 COSTIM\_up  
MRPL19 COSTIM\_up  
LANCL1 COSTIM\_up  
WDR75 COSTIM\_up  
FANCL COSTIM\_up  
FN1 COSTIM\_up  
STAT1 COSTIM\_up  
GLS COSTIM\_up  
CCT4 COSTIM\_up

|          |           |
|----------|-----------|
| TXNDC9   | COSTIM_up |
| COQ10B   | COSTIM_up |
| SF3B1    | COSTIM_up |
| CHST10   | COSTIM_up |
| PDCL3    | COSTIM_up |
| HSPE1    | COSTIM_up |
| PLCD4    | COSTIM_up |
| ZNF142   | COSTIM_up |
| IL1R1    | COSTIM_up |
| CNPPD1   | COSTIM_up |
| UXS1     | COSTIM_up |
| ABCB6    | COSTIM_up |
| STK16    | COSTIM_up |
| HDLBP    | COSTIM_up |
| PPP1R7   | COSTIM_up |
| PASK     | COSTIM_up |
| STK25    | COSTIM_up |
| ID2      | COSTIM_up |
| TAF1B    | COSTIM_up |
| ODC1     | COSTIM_up |
| NOL10    | COSTIM_up |
| PLEKHB2  | COSTIM_up |
| GORASP2  | COSTIM_up |
| CEBPZ    | COSTIM_up |
| DCAF17   | COSTIM_up |
| RAB3GAP1 | COSTIM_up |
| SLC25A12 | COSTIM_up |
| DARS1    | COSTIM_up |
| SRSF7    | COSTIM_up |
| KYNU     | COSTIM_up |
| COX7A2L  | COSTIM_up |
| PN01     | COSTIM_up |
| PLEK     | COSTIM_up |
| ATF2     | COSTIM_up |
| THADA    | COSTIM_up |
| AAK1     | COSTIM_up |
| ARID3A   | COSTIM_up |
| SUM01    | COSTIM_up |
| GRIN3B   | COSTIM_up |
| NFE2L2   | COSTIM_up |
| MSH6     | COSTIM_up |
| SPR      | COSTIM_up |
| FARSB    | COSTIM_up |
| BCL9     | COSTIM_up |
| DHCR24   | COSTIM_up |
| MARK1    | COSTIM_up |
| CACYBP   | COSTIM_up |
| SCP2     | COSTIM_up |
| CEP104   | COSTIM_up |
| FAM20B   | COSTIM_up |

|          |           |
|----------|-----------|
| LRR42    | COSTIM_up |
| MRPL37   | COSTIM_up |
| ICMT     | COSTIM_up |
| RPL22    | COSTIM_up |
| CHD5     | COSTIM_up |
| PARK7    | COSTIM_up |
| AMPD2    | COSTIM_up |
| SRSF4    | COSTIM_up |
| MECR     | COSTIM_up |
| EDEM3    | COSTIM_up |
| WDR77    | COSTIM_up |
| ATP5PB   | COSTIM_up |
| HDAC1    | COSTIM_up |
| CAPZA1   | COSTIM_up |
| SCAMP3   | COSTIM_up |
| DLGAP3   | COSTIM_up |
| SFPQ     | COSTIM_up |
| ARHGEF2  | COSTIM_up |
| LAMTOR2  | COSTIM_up |
| MEF2D    | COSTIM_up |
| SRM      | COSTIM_up |
| FBX06    | COSTIM_up |
| MAD2L2   | COSTIM_up |
| IVNS1ABP | COSTIM_up |
| MFN2     | COSTIM_up |
| MIIP     | COSTIM_up |
| SMG7     | COSTIM_up |
| NCF2     | COSTIM_up |
| R060     | COSTIM_up |
| UCHL5    | COSTIM_up |
| BCAS2    | COSTIM_up |
| AGMAT    | COSTIM_up |
| PLEKHM2  | COSTIM_up |
| CRYZ     | COSTIM_up |
| PHTF1    | COSTIM_up |
| ZBTB17   | COSTIM_up |
| CD58     | COSTIM_up |
| TTF2     | COSTIM_up |
| KIF21B   | COSTIM_up |
| ADPRHL2  | COSTIM_up |
| MAP7D1   | COSTIM_up |
| WARS2    | COSTIM_up |
| MRPS15   | COSTIM_up |
| GNPAT    | COSTIM_up |
| TSNAX    | COSTIM_up |
| C1orf109 | COSTIM_up |
| RRAGC    | COSTIM_up |
| NID1     | COSTIM_up |
| MTR      | COSTIM_up |
| RIMS3    | COSTIM_up |

|          |           |
|----------|-----------|
| ETV3     | COSTIM_up |
| ACADM    | COSTIM_up |
| SLAMF1   | COSTIM_up |
| ADGRL2   | COSTIM_up |
| SDHB     | COSTIM_up |
| RPF1     | COSTIM_up |
| UAP1     | COSTIM_up |
| KLHL12   | COSTIM_up |
| ZNHIT6   | COSTIM_up |
| RBBP5    | COSTIM_up |
| GBP1     | COSTIM_up |
| PINK1-AS | COSTIM_up |
| CDK18    | COSTIM_up |
| RAB29    | COSTIM_up |
| ECE1     | COSTIM_up |
| GALE     | COSTIM_up |
| PRPF3    | COSTIM_up |
| APH1A    | COSTIM_up |
| EBNA1BP2 | COSTIM_up |
| CDC20    | COSTIM_up |
| IP013    | COSTIM_up |
| ATP6V0B  | COSTIM_up |
| B4GALT2  | COSTIM_up |
| ERI3     | COSTIM_up |
| PTCH2    | COSTIM_up |
| AKR1A1   | COSTIM_up |
| PRDX1    | COSTIM_up |
| PIK3R3   | COSTIM_up |
| SLC19A2  | COSTIM_up |
| FAAH     | COSTIM_up |
| NSUN4    | COSTIM_up |
| DR1      | COSTIM_up |
| PRRC2C   | COSTIM_up |
| DPH5     | COSTIM_up |
| PRDX6    | COSTIM_up |
| DARS2    | COSTIM_up |
| UTP25    | COSTIM_up |
| RCAN3    | COSTIM_up |
| MTFR1L   | COSTIM_up |
| RPS6KA1  | COSTIM_up |
| DHDDS    | COSTIM_up |
| ARID1A   | COSTIM_up |
| RPA2     | COSTIM_up |
| PPP1R8   | COSTIM_up |
| CD3EAP   | COSTIM_up |
| RCN2     | COSTIM_up |
| CTSD     | COSTIM_up |
| STK11    | COSTIM_up |
| KPTN     | COSTIM_up |
| RPS25    | COSTIM_up |

|          |           |
|----------|-----------|
| CAMSAP2  | COSTIM_up |
| ATF6     | COSTIM_up |
| MREG     | COSTIM_up |
| FASTKD2  | COSTIM_up |
| NRP2     | COSTIM_up |
| KLF7     | COSTIM_up |
| B4GALT6  | COSTIM_up |
| ATP10B   | COSTIM_up |
| SPCS2    | COSTIM_up |
| UBE3D    | COSTIM_up |
| ANKRD13C | COSTIM_up |
| ZC2HC1B  | COSTIM_up |
| PLAGL1   | COSTIM_up |
| FBX030   | COSTIM_up |
| TNFAIP3  | COSTIM_up |
| SGK1     | COSTIM_up |
| MED28    | COSTIM_up |
| RXYLT1   | COSTIM_up |
| VAMP8    | COSTIM_up |
| DCLRE1B  | COSTIM_up |
| MYL12B   | COSTIM_up |
| RPN2     | COSTIM_up |
| TGIF2    | COSTIM_up |
| CCNI     | COSTIM_up |
| RARRES1  | COSTIM_up |
| MFSD1    | COSTIM_up |
| RAB3GAP2 | COSTIM_up |
| EEF2KMT  | COSTIM_up |
| UBN1     | COSTIM_up |
| UCHL3    | COSTIM_up |
| LDAH     | COSTIM_up |
| CCND2    | COSTIM_up |
| ELL2     | COSTIM_up |
| CYP20A1  | COSTIM_up |
| NDUFB3   | COSTIM_up |
| GTF3C3   | COSTIM_up |
| TJP2     | COSTIM_up |
| CPSF3    | COSTIM_up |
| SEN5     | COSTIM_up |
| HEATR1   | COSTIM_up |
| RAD23B   | COSTIM_up |
| ABITRAM  | COSTIM_up |
| SET      | COSTIM_up |
| GLE1     | COSTIM_up |
| RAB14    | COSTIM_up |
| FBXW2    | COSTIM_up |
| NEK6     | COSTIM_up |
| PPP6C    | COSTIM_up |
| NDUFA8   | COSTIM_up |
| RBM18    | COSTIM_up |

|          |           |
|----------|-----------|
| MAPKAP1  | COSTIM_up |
| ALG2     | COSTIM_up |
| ZBTB45   | COSTIM_up |
| DCAF4    | COSTIM_up |
| FCF1     | COSTIM_up |
| NEK9     | COSTIM_up |
| ACOT2    | COSTIM_up |
| AREL1    | COSTIM_up |
| MLH3     | COSTIM_up |
| SLIRP    | COSTIM_up |
| RBM25    | COSTIM_up |
| EIF2B2   | COSTIM_up |
| NRDE2    | COSTIM_up |
| GPR75    | COSTIM_up |
| SUPT7L   | COSTIM_up |
| DNMT3A   | COSTIM_up |
| TMEM214  | COSTIM_up |
| FAM98A   | COSTIM_up |
| IDE      | COSTIM_up |
| GPAM     | COSTIM_up |
| SMNDC1   | COSTIM_up |
| HELLS    | COSTIM_up |
| TCTN3    | COSTIM_up |
| KCNIP2   | COSTIM_up |
| GOT1     | COSTIM_up |
| PANK3    | COSTIM_up |
| RCL1     | COSTIM_up |
| CAAP1    | COSTIM_up |
| CD274    | COSTIM_up |
| NUP43    | COSTIM_up |
| MTHFD1L  | COSTIM_up |
| PCMT1    | COSTIM_up |
| CYSTM1   | COSTIM_up |
| WDR55    | COSTIM_up |
| CENPL    | COSTIM_up |
| ACAT2    | COSTIM_up |
| TCP1     | COSTIM_up |
| MSANTD2  | COSTIM_up |
| PDZD11   | COSTIM_up |
| NUDCD1   | COSTIM_up |
| ENY2     | COSTIM_up |
| KIAA1217 | COSTIM_up |
| TAF12    | COSTIM_up |
| TNFSF11  | COSTIM_up |
| DNAJC15  | COSTIM_up |
| PROSER1  | COSTIM_up |
| UFM1     | COSTIM_up |
| WBP4     | COSTIM_up |
| HSPH1    | COSTIM_up |
| ALG5     | COSTIM_up |



|           |           |
|-----------|-----------|
| EXOSC8    | COSTIM_up |
| ETF1      | COSTIM_up |
| SIL1      | COSTIM_up |
| SERP1     | COSTIM_up |
| UTP20     | COSTIM_up |
| TMP0      | COSTIM_up |
| ARL1      | COSTIM_up |
| MTERF2    | COSTIM_up |
| SOCS2     | COSTIM_up |
| DUSP4     | COSTIM_up |
| TNFRSF10B | COSTIM_up |
| SORBS3    | COSTIM_up |
| PPP3CC    | COSTIM_up |
| PDLIM2    | COSTIM_up |
| UBIAD1    | COSTIM_up |
| TARDBP    | COSTIM_up |
| TNFRSF8   | COSTIM_up |
| ZNF706    | COSTIM_up |
| LYPLA1    | COSTIM_up |
| COPS5     | COSTIM_up |
| AKAP1     | COSTIM_up |
| COIL      | COSTIM_up |
| SLC35B1   | COSTIM_up |
| PYROXD1   | COSTIM_up |
| LHX4      | COSTIM_up |
| RNF2      | COSTIM_up |
| SEC22A    | COSTIM_up |
| B4GALT4   | COSTIM_up |
| NAA50     | COSTIM_up |
| CD80      | COSTIM_up |
| DESI2     | COSTIM_up |
| ZCCHC17   | COSTIM_up |
| KHDRBS1   | COSTIM_up |
| TMEM39B   | COSTIM_up |
| ZNF639    | COSTIM_up |
| PDS5A     | COSTIM_up |
| LIAS      | COSTIM_up |
| GTDC1     | COSTIM_up |
| ZRANB3    | COSTIM_up |
| RPL21     | COSTIM_up |
| GTF3A     | COSTIM_up |
| RASL11A   | COSTIM_up |
| FYTTD1    | COSTIM_up |
| MRPS2     | COSTIM_up |
| COPA      | COSTIM_up |
| RBBP6     | COSTIM_up |
| ZC3H7A    | COSTIM_up |
| SHLD2     | COSTIM_up |
| PRXL2A    | COSTIM_up |
| RPL5      | COSTIM_up |

TRMT13 COSTIM\_up  
RPAP2 COSTIM\_up  
PMS2 COSTIM\_up  
ZMIZ2 COSTIM\_up  
CBX3 COSTIM\_up  
HNRNPA2B1 COSTIM\_up  
INHBA COSTIM\_up  
ARL4A COSTIM\_up  
CCZ1 COSTIM\_up  
MRM2 COSTIM\_up  
SMU1 COSTIM\_up  
SLC25A51 COSTIM\_up  
CLTA COSTIM\_up  
DCAF10 COSTIM\_up  
PLAU COSTIM\_up  
SRGN COSTIM\_up  
CISD1 COSTIM\_up  
ECD COSTIM\_up  
P4HA1 COSTIM\_up  
SLC25A16 COSTIM\_up  
ZWINT COSTIM\_up  
VPS26A COSTIM\_up  
RBM19 COSTIM\_up  
DDX54 COSTIM\_up  
CDKN2C COSTIM\_up  
RNF11 COSTIM\_up  
ACOT9 COSTIM\_up  
PRDX4 COSTIM\_up  
DDX39A COSTIM\_up  
PKN1 COSTIM\_up  
TRIR COSTIM\_up  
ADGRE5 COSTIM\_up  
GIPC1 COSTIM\_up  
SPRYD7 COSTIM\_up  
EBPL COSTIM\_up  
ZC3H13 COSTIM\_up  
NLN COSTIM\_up  
OPTN COSTIM\_up  
ATF1 COSTIM\_up  
TSFM COSTIM\_up  
SPATS2 COSTIM\_up  
ORMDL2 COSTIM\_up  
ATG101 COSTIM\_up  
IKZF4 COSTIM\_up  
TUBA1B COSTIM\_up  
EEF1AKMT3 COSTIM\_up  
KBTBD4 COSTIM\_up  
ATPAF1 COSTIM\_up  
AMD1 COSTIM\_up  
NDUFAF4 COSTIM\_up

MORF4L2 COSTIM\_up  
RAB9A COSTIM\_up  
NMI COSTIM\_up  
SLC36A1 COSTIM\_up  
BATF3 COSTIM\_up  
G0S2 COSTIM\_up  
RAP2C COSTIM\_up  
EXOSC9 COSTIM\_up  
PLA2G12A COSTIM\_up  
CKS2 COSTIM\_up  
ACSL3 COSTIM\_up  
CHPF COSTIM\_up  
DNPEP COSTIM\_up  
ENKD1 COSTIM\_up  
TTPAL COSTIM\_up  
PREX1 COSTIM\_up  
NCOA5 COSTIM\_up  
VAPB COSTIM\_up  
ATP5F1E COSTIM\_up  
TOX2 COSTIM\_up  
SRSF6 COSTIM\_up  
ARFGEF2 COSTIM\_up  
ZNF576 COSTIM\_up  
CSE1L COSTIM\_up  
RAB22A COSTIM\_up  
STAU1 COSTIM\_up  
MOCS3 COSTIM\_up  
DDX27 COSTIM\_up  
KCNK15 COSTIM\_up  
MTRR COSTIM\_up  
FASTKD3 COSTIM\_up  
PEPD COSTIM\_up  
VAMP7 COSTIM\_up  
STAMPB COSTIM\_up  
SNRNP27 COSTIM\_up  
MPHOSPH10 COSTIM\_up  
ZNF576 COSTIM\_up  
BTN2A2 COSTIM\_up  
MRS2 COSTIM\_up  
WRNIP1 COSTIM\_up  
RRP36 COSTIM\_up  
SNRPC COSTIM\_up  
XP05 COSTIM\_up  
ABCC10 COSTIM\_up  
PEX6 COSTIM\_up  
AARS2 COSTIM\_up  
RPS10 COSTIM\_up  
MAD2L1BP COSTIM\_up  
MEA1 COSTIM\_up  
CDKN1A COSTIM\_up

|          |           |
|----------|-----------|
| GL01     | COSTIM_up |
| CPNE5    | COSTIM_up |
| RREB1    | COSTIM_up |
| SSR1     | COSTIM_up |
| RIOK1    | COSTIM_up |
| RPP40    | COSTIM_up |
| ATXN1    | COSTIM_up |
| NUP153   | COSTIM_up |
| EEF1E1   | COSTIM_up |
| RUNX2    | COSTIM_up |
| AHNAK    | COSTIM_up |
| EMC3     | COSTIM_up |
| CNOT1    | COSTIM_up |
| GOT2     | COSTIM_up |
| RAP2A    | COSTIM_up |
| ABCC4    | COSTIM_up |
| HROB     | COSTIM_up |
| UPF3B    | COSTIM_up |
| NDUFA1   | COSTIM_up |
| FAM193A  | COSTIM_up |
| MRPS7    | COSTIM_up |
| GGA3     | COSTIM_up |
| NUP85    | COSTIM_up |
| SLC25A19 | COSTIM_up |
| NT5C     | COSTIM_up |
| MST01    | COSTIM_up |
| C1orf61  | COSTIM_up |
| GTF3C4   | COSTIM_up |
| DDX31    | COSTIM_up |
| PPP1R12C | COSTIM_up |
| PPDPF    | COSTIM_up |
| IL1B     | COSTIM_up |
| CHCHD5   | COSTIM_up |
| POLR1B   | COSTIM_up |
| GTF2F1   | COSTIM_up |
| CLPP     | COSTIM_up |
| MED1     | COSTIM_up |
| RPL23    | COSTIM_up |
| CD70     | COSTIM_up |
| TRIP10   | COSTIM_up |
| TNFSF14  | COSTIM_up |
| OPA3     | COSTIM_up |
| SNRPD2   | COSTIM_up |
| EML2     | COSTIM_up |
| VASP     | COSTIM_up |
| SYMPK    | COSTIM_up |
| GZF1     | COSTIM_up |
| CENPB    | COSTIM_up |
| PSMF1    | COSTIM_up |
| DTD1     | COSTIM_up |

|         |           |
|---------|-----------|
| RBCK1   | COSTIM_up |
| STK35   | COSTIM_up |
| SNRPB   | COSTIM_up |
| DSTN    | COSTIM_up |
| SNRPB2  | COSTIM_up |
| ITPA    | COSTIM_up |
| MCM8    | COSTIM_up |
| MRPS26  | COSTIM_up |
| NCLN    | COSTIM_up |
| HNRNPR  | COSTIM_up |
| ARMCX5  | COSTIM_up |
| RALY    | COSTIM_up |
| DYNLRB1 | COSTIM_up |
| EIF2S2  | COSTIM_up |
| ERGIC3  | COSTIM_up |
| ROM01   | COSTIM_up |
| PLAGL2  | COSTIM_up |
| PSMB2   | COSTIM_up |
| AG03    | COSTIM_up |
| UROD    | COSTIM_up |
| PCID2   | COSTIM_up |
| CAPNS1  | COSTIM_up |
| PDCD2L  | COSTIM_up |
| RBM42   | COSTIM_up |
| KIRREL2 | COSTIM_up |
| UBA2    | COSTIM_up |
| FFAR1   | COSTIM_up |
| COX6B1  | COSTIM_up |
| CCR7    | COSTIM_up |
| PRDX5   | COSTIM_up |
| BCL2L12 | COSTIM_up |
| PRMT1   | COSTIM_up |
| SCAF1   | COSTIM_up |
| SBDS    | COSTIM_up |
| STAT5A  | COSTIM_up |
| BECN1   | COSTIM_up |
| TRAP1   | COSTIM_up |
| NSRP1   | COSTIM_up |
| DNAJC8  | COSTIM_up |
| ZNF384  | COSTIM_up |
| EMG1    | COSTIM_up |
| UXT     | COSTIM_up |
| ELK1    | COSTIM_up |
| TIMM17B | COSTIM_up |
| PCNX4   | COSTIM_up |
| KTN1    | COSTIM_up |
| TRMT5   | COSTIM_up |
| NUP214  | COSTIM_up |
| MAP2K2  | COSTIM_up |
| HNRNPH2 | COSTIM_up |

|         |           |
|---------|-----------|
| TIMM8A  | COSTIM_up |
| CANX    | COSTIM_up |
| INTS11  | COSTIM_up |
| IPPK    | COSTIM_up |
| OMD     | COSTIM_up |
| HIVEP3  | COSTIM_up |
| COX7C   | COSTIM_up |
| TRAF2   | COSTIM_up |
| ABHD8   | COSTIM_up |
| RAP1B   | COSTIM_up |
| RAB3IP  | COSTIM_up |
| YEATS4  | COSTIM_up |
| TRPV5   | COSTIM_up |
| PIN1    | COSTIM_up |
| EMC1    | COSTIM_up |
| UBR4    | COSTIM_up |
| ADGRE2  | COSTIM_up |
| SIN3B   | COSTIM_up |
| SLC35E1 | COSTIM_up |
| UQCR11  | COSTIM_up |
| GFER    | COSTIM_up |
| WDR24   | COSTIM_up |
| CHTF18  | COSTIM_up |
| TUBBP1  | COSTIM_up |
| MACF1   | COSTIM_up |
| SMARCA4 | COSTIM_up |
| TICAM1  | COSTIM_up |
| EMC6    | COSTIM_up |
| METTL16 | COSTIM_up |
| AAMP    | COSTIM_up |
| RNF6    | COSTIM_up |
| ECHS1   | COSTIM_up |
| GNG11   | COSTIM_up |
| SEM1    | COSTIM_up |
| POR     | COSTIM_up |
| STYXL1  | COSTIM_up |
| MTERF1  | COSTIM_up |
| ZFP36   | COSTIM_up |
| SRD5A3  | COSTIM_up |
| PAICS   | COSTIM_up |
| PPAT    | COSTIM_up |
| TUBGCP6 | COSTIM_up |
| ADM2    | COSTIM_up |
| DGCR8   | COSTIM_up |
| SDF2L1  | COSTIM_up |
| YWHAH   | COSTIM_up |
| MGAT3   | COSTIM_up |
| ATF4    | COSTIM_up |
| A4GALT  | COSTIM_up |
| EMC4    | COSTIM_up |

|          |           |
|----------|-----------|
| ATP6V1F  | COSTIM_up |
| LSM8     | COSTIM_up |
| STRIP2   | COSTIM_up |
| IFT22    | COSTIM_up |
| LRRC4    | COSTIM_up |
| CALU     | COSTIM_up |
| IRF5     | COSTIM_up |
| NDUFA5   | COSTIM_up |
| MRPS12   | COSTIM_up |
| MTX2     | COSTIM_up |
| EIF2S2P4 | COSTIM_up |
| HAT1     | COSTIM_up |
| PSMG2    | COSTIM_up |
| IN080    | COSTIM_up |
| ICE2     | COSTIM_up |
| KNSTRN   | COSTIM_up |
| DUT      | COSTIM_up |
| CHAC1    | COSTIM_up |
| CLN6     | COSTIM_up |
| ARPP19   | COSTIM_up |
| CALML4   | COSTIM_up |
| ANAPC13  | COSTIM_up |
| COPB1    | COSTIM_up |
| PSMA1    | COSTIM_up |
| SUMF2    | COSTIM_up |
| SPCS3    | COSTIM_up |
| DCTD     | COSTIM_up |
| USP6     | COSTIM_up |
| PLD2     | COSTIM_up |
| CD68     | COSTIM_up |
| TXNDC17  | COSTIM_up |
| KIF1C    | COSTIM_up |
| MPDU1    | COSTIM_up |
| CCNT1    | COSTIM_up |
| PUS7L    | COSTIM_up |
| KRI1     | COSTIM_up |
| ILF3     | COSTIM_up |
| NGDN     | COSTIM_up |
| DTD2     | COSTIM_up |
| SNX6     | COSTIM_up |
| EGLN3    | COSTIM_up |
| NEDD8    | COSTIM_up |
| DAD1     | COSTIM_up |
| MAP7D3   | COSTIM_up |
| TTI2     | COSTIM_up |
| CHRNA10  | COSTIM_up |
| KLF16    | COSTIM_up |
| DOHH     | COSTIM_up |
| ABHD17A  | COSTIM_up |
| CBFA2T3  | COSTIM_up |

|          |           |
|----------|-----------|
| GALNT8   | COSTIM_up |
| CRACR2A  | COSTIM_up |
| GNL3L    | COSTIM_up |
| ECSIT    | COSTIM_up |
| LDLR     | COSTIM_up |
| ELOF1    | COSTIM_up |
| TOMM40   | COSTIM_up |
| APOC1    | COSTIM_up |
| GADD45G  | COSTIM_up |
| XP07     | COSTIM_up |
| RPL36    | COSTIM_up |
| KIF1A    | COSTIM_up |
| GTPBP3   | COSTIM_up |
| BST2     | COSTIM_up |
| NSUN5    | COSTIM_up |
| DDA1     | COSTIM_up |
| PGLS     | COSTIM_up |
| LSM7     | COSTIM_up |
| SNX9     | COSTIM_up |
| MLLT1    | COSTIM_up |
| ACTN4    | COSTIM_up |
| STK33    | COSTIM_up |
| NDUFA10  | COSTIM_up |
| ARPC1B   | COSTIM_up |
| UBAC1    | COSTIM_up |
| ZBTB46   | COSTIM_up |
| SAMD10   | COSTIM_up |
| LSP1     | COSTIM_up |
| COL5A1   | COSTIM_up |
| ATXN10   | COSTIM_up |
| TUBGCP2  | COSTIM_up |
| CEP85    | COSTIM_up |
| ADRM1    | COSTIM_up |
| ASS1     | COSTIM_up |
| EXOSC2   | COSTIM_up |
| UCK1     | COSTIM_up |
| CHMP2A   | COSTIM_up |
| UBE2M    | COSTIM_up |
| TRIM28   | COSTIM_up |
| METTTL26 | COSTIM_up |
| YIPF2    | COSTIM_up |
| EIF2S3   | COSTIM_up |
| TMEM160  | COSTIM_up |
| ZC3H4    | COSTIM_up |
| LRRC47   | COSTIM_up |
| SESN2    | COSTIM_up |
| ATP5IF1  | COSTIM_up |
| CLIP1    | COSTIM_up |
| ZNF317   | COSTIM_up |
| PPAN     | COSTIM_up |



|          |           |
|----------|-----------|
| EIF3G    | COSTIM_up |
| DNMT1    | COSTIM_up |
| ZNF426   | COSTIM_up |
| DKC1     | COSTIM_up |
| PLXNA3   | COSTIM_up |
| NOL11    | COSTIM_up |
| UBE4B    | COSTIM_up |
| CASZ1    | COSTIM_up |
| UBA1     | COSTIM_up |
| AKAP12   | COSTIM_up |
| LATS1    | COSTIM_up |
| AAR2     | COSTIM_up |
| RBM39    | COSTIM_up |
| ZNF341   | COSTIM_up |
| ATP6V1E1 | COSTIM_up |
| COX4I1   | COSTIM_up |
| EMC8     | COSTIM_up |
| CHMP1A   | COSTIM_up |
| COX7B    | COSTIM_up |
| CAP1     | COSTIM_up |
| PPT1     | COSTIM_up |
| RLIM     | COSTIM_up |
| TRAF3    | COSTIM_up |
| MRPS25   | COSTIM_up |
| RFTN1    | COSTIM_up |
| SLC6A6   | COSTIM_up |
| NR1H2    | COSTIM_up |
| KIF3A    | COSTIM_up |
| TUBG1    | COSTIM_up |
| PSME3    | COSTIM_up |
| RPL27    | COSTIM_up |
| PSMC3IP  | COSTIM_up |
| AOC3     | COSTIM_up |
| ACLY     | COSTIM_up |
| VPS25    | COSTIM_up |
| AOC2     | COSTIM_up |
| NDUFA2   | COSTIM_up |
| DIAPH1   | COSTIM_up |
| UBE2D2   | COSTIM_up |
| C1orf159 | COSTIM_up |
| PPFIA1   | COSTIM_up |
| KREMEN2  | COSTIM_up |
| THOC6    | COSTIM_up |
| TRAF7    | COSTIM_up |
| NINJ1    | COSTIM_up |
| MAP1B    | COSTIM_up |
| IL13RA1  | COSTIM_up |
| WDR44    | COSTIM_up |
| ZCCHC9   | COSTIM_up |
| RARA     | COSTIM_up |

|          |           |
|----------|-----------|
| KHDRBS3  | COSTIM_up |
| CHD1L    | COSTIM_up |
| PEX11B   | COSTIM_up |
| PDHA1    | COSTIM_up |
| MCCC2    | COSTIM_up |
| SELENOS  | COSTIM_up |
| SNRPA1   | COSTIM_up |
| THAP1    | COSTIM_up |
| C19orf12 | COSTIM_up |
| ACTR10   | COSTIM_up |
| GCH1     | COSTIM_up |
| LGALS3   | COSTIM_up |
| DNAJB1   | COSTIM_up |
| ZSWIM4   | COSTIM_up |
| FBXW9    | COSTIM_up |
| TRIM21   | COSTIM_up |
| LRRC41   | COSTIM_up |
| DHX30    | COSTIM_up |
| HSD17B7  | COSTIM_up |
| ENOSF1   | COSTIM_up |
| EMILIN2  | COSTIM_up |
| SLX1A    | COSTIM_up |
| ARFIP2   | COSTIM_up |
| RRP8     | COSTIM_up |
| PTCD3    | COSTIM_up |
| IMMT     | COSTIM_up |
| MRPL35   | COSTIM_up |
| ILKAP    | COSTIM_up |
| PER2     | COSTIM_up |
| PTPRE    | COSTIM_up |
| RAN      | COSTIM_up |
| CLUH     | COSTIM_up |
| MYBBP1A  | COSTIM_up |
| RPA1     | COSTIM_up |
| UBE2G1   | COSTIM_up |
| EEFSEC   | COSTIM_up |
| C0Q3     | COSTIM_up |
| SEC61G   | COSTIM_up |
| LANCL2   | COSTIM_up |
| FIGNL1   | COSTIM_up |
| GRSF1    | COSTIM_up |
| ANKRD17  | COSTIM_up |
| UTP3     | COSTIM_up |
| WBP2     | COSTIM_up |
| H3-3B    | COSTIM_up |
| ZRANB2   | COSTIM_up |
| EIF5A    | COSTIM_up |
| KDM6B    | COSTIM_up |
| GPS2     | COSTIM_up |
| RIDA     | COSTIM_up |

|          |           |
|----------|-----------|
| MATN2    | COSTIM_up |
| ERAL1    | COSTIM_up |
| NIP7     | COSTIM_up |
| VPS4A    | COSTIM_up |
| PCNA     | COSTIM_up |
| NXT1     | COSTIM_up |
| POLR3F   | COSTIM_up |
| DAP3     | COSTIM_up |
| KHDC4    | COSTIM_up |
| MMACHC   | COSTIM_up |
| DPH2     | COSTIM_up |
| TOE1     | COSTIM_up |
| NASP     | COSTIM_up |
| MUTYH    | COSTIM_up |
| CTNBL1   | COSTIM_up |
| ZBED3    | COSTIM_up |
| DCTN4    | COSTIM_up |
| MTUS2    | COSTIM_up |
| XP04     | COSTIM_up |
| POMP     | COSTIM_up |
| CDK8     | COSTIM_up |
| PENT     | COSTIM_up |
| SC01     | COSTIM_up |
| SPART    | COSTIM_up |
| RFC3     | COSTIM_up |
| BEX2     | COSTIM_up |
| TCEAL4   | COSTIM_up |
| FAM104A  | COSTIM_up |
| SLC39A11 | COSTIM_up |
| SRRM1    | COSTIM_up |
| ZNF414   | COSTIM_up |
| HSPBP1   | COSTIM_up |
| CNDP2    | COSTIM_up |
| MACROD1  | COSTIM_up |
| WDR74    | COSTIM_up |
| MYH11    | COSTIM_up |
| MED10    | COSTIM_up |
| MORC2    | COSTIM_up |
| AGAP3    | COSTIM_up |
| KRBA1    | COSTIM_up |
| ACTR3B   | COSTIM_up |
| C12orf29 | COSTIM_up |
| ATP13A3  | COSTIM_up |
| KRAS     | COSTIM_up |
| IP08     | COSTIM_up |
| LARS1    | COSTIM_up |
| CCDC59   | COSTIM_up |
| SWAP70   | COSTIM_up |
| AMPD3    | COSTIM_up |
| DPF2     | COSTIM_up |

|          |           |
|----------|-----------|
| MEN1     | COSTIM_up |
| ERG28    | COSTIM_up |
| COX16    | COSTIM_up |
| MED6     | COSTIM_up |
| EIF2S1   | COSTIM_up |
| ELP3     | COSTIM_up |
| ADAMDEC1 | COSTIM_up |
| CTIF     | COSTIM_up |
| MBD2     | COSTIM_up |
| IER3IP1  | COSTIM_up |
| MRPS36   | COSTIM_up |
| CCNB1    | COSTIM_up |
| CDK7     | COSTIM_up |
| THUMPD3  | COSTIM_up |
| BHLHE40  | COSTIM_up |
| ARL8B    | COSTIM_up |
| EDEM1    | COSTIM_up |
| MEIS2    | COSTIM_up |
| DPH6     | COSTIM_up |
| EMC7     | COSTIM_up |
| PRPF38B  | COSTIM_up |
| LAMTOR5  | COSTIM_up |
| TRIM45   | COSTIM_up |
| NAPG     | COSTIM_up |
| FKBP11   | COSTIM_up |
| ARF3     | COSTIM_up |
| TMEM106C | COSTIM_up |
| SLC38A2  | COSTIM_up |
| YWHAQ    | COSTIM_up |
| LDHA     | COSTIM_up |
| CDC73    | COSTIM_up |
| TIMM17A  | COSTIM_up |
| NARS1    | COSTIM_up |
| RBM17    | COSTIM_up |
| IL2RA    | COSTIM_up |
| ECHDC3   | COSTIM_up |
| IL15RA   | COSTIM_up |
| TMEM241  | COSTIM_up |
| SOX5     | COSTIM_up |
| PRH2     | COSTIM_up |
| RBMX2    | COSTIM_up |
| PUM1     | COSTIM_up |
| YARS1    | COSTIM_up |
| GNL2     | COSTIM_up |
| BTF3L4   | COSTIM_up |
| PRPF38A  | COSTIM_up |
| RNF138   | COSTIM_up |
| TPGS2    | COSTIM_up |
| SLC43A3  | COSTIM_up |
| TIMM10   | COSTIM_up |

|          |           |
|----------|-----------|
| DHX34    | COSTIM_up |
| FADS2    | COSTIM_up |
| TMEM258  | COSTIM_up |
| TMEM165  | COSTIM_up |
| CLOCK    | COSTIM_up |
| STT3A    | COSTIM_up |
| KLB      | COSTIM_up |
| TMED7    | COSTIM_up |
| WDR36    | COSTIM_up |
| RFK      | COSTIM_up |
| UBQLN1   | COSTIM_up |
| C9orf40  | COSTIM_up |
| AGTPBP1  | COSTIM_up |
| PSAT1    | COSTIM_up |
| P2RX4    | COSTIM_up |
| DTX1     | COSTIM_up |
| TRAFD1   | COSTIM_up |
| HILPDA   | COSTIM_up |
| RINT1    | COSTIM_up |
| KCP      | COSTIM_up |
| TES      | COSTIM_up |
| MDFIC    | COSTIM_up |
| SYNCRIP  | COSTIM_up |
| ORC3     | COSTIM_up |
| LM02     | COSTIM_up |
| NAT10    | COSTIM_up |
| CAPRIN1  | COSTIM_up |
| ATP5MC2  | COSTIM_up |
| DNAJC14  | COSTIM_up |
| CD63     | COSTIM_up |
| FAM186B  | COSTIM_up |
| BLOC1S1  | COSTIM_up |
| CDK4     | COSTIM_up |
| TSPAN31  | COSTIM_up |
| B4GALNT1 | COSTIM_up |
| TFCP2    | COSTIM_up |
| ESPL1    | COSTIM_up |
| HNRNPA1  | COSTIM_up |
| ACVR1B   | COSTIM_up |
| LTV1     | COSTIM_up |
| CD164    | COSTIM_up |
| SMPD2    | COSTIM_up |
| MICAL1   | COSTIM_up |
| STX11    | COSTIM_up |
| TEC      | COSTIM_up |
| CCT7     | COSTIM_up |
| SMYD5    | COSTIM_up |
| EMX1     | COSTIM_up |
| GNS      | COSTIM_up |
| MDM2     | COSTIM_up |

MPH0SPH6 COSTIM\_up  
DYNC1LI2 COSTIM\_up  
FH0D1 COSTIM\_up  
CCDC102A COSTIM\_up  
SLC9A5 COSTIM\_up  
URB2 COSTIM\_up  
COG2 COSTIM\_up  
NTPCR COSTIM\_up  
TAF5L COSTIM\_up  
STX6 COSTIM\_up  
DHX9 COSTIM\_up  
KIAA1614 COSTIM\_up  
NIBAN1 COSTIM\_up  
GPR55 COSTIM\_up  
MRPL44 COSTIM\_up  
DOCK10 COSTIM\_up  
TTLL4 COSTIM\_up  
USP37 COSTIM\_up  
HTR2B COSTIM\_up  
SERPINE2 COSTIM\_up  
EIF4E2 COSTIM\_up  
ARMC9 COSTIM\_up  
CAB39 COSTIM\_up  
COX5B COSTIM\_up  
TGFBRAP1 COSTIM\_up  
MRPS9 COSTIM\_up  
C2orf49 COSTIM\_up  
ISCU COSTIM\_up  
ALDH1L2 COSTIM\_up  
SCYL2 COSTIM\_up  
PLXNC1 COSTIM\_up  
PWP1 COSTIM\_up  
DRAM1 COSTIM\_up  
SLC41A2 COSTIM\_up  
VILL COSTIM\_up  
TBC1D4 COSTIM\_up  
LRCH1 COSTIM\_up  
SUCLA2 COSTIM\_up  
MED4 COSTIM\_up  
PHF11 COSTIM\_up  
NUDT15 COSTIM\_up  
LCP1 COSTIM\_up  
GPNMB COSTIM\_up  
RAC1 COSTIM\_up  
KDEL2 COSTIM\_up  
IL6 COSTIM\_up  
BZW2 COSTIM\_up  
TBRG4 COSTIM\_up  
DDX56 COSTIM\_up  
MYO1G COSTIM\_up

|         |           |
|---------|-----------|
| TTC5    | COSTIM_up |
| ZFHX2   | COSTIM_up |
| MTHFS   | COSTIM_up |
| ADAMTS7 | COSTIM_up |
| IREB2   | COSTIM_up |
| ALPK3   | COSTIM_up |
| RSAD1   | COSTIM_up |
| NMT1    | COSTIM_up |
| SRSF1   | COSTIM_up |
| TAC01   | COSTIM_up |
| TEX2    | COSTIM_up |
| DCAF7   | COSTIM_up |
| ACTL6A  | COSTIM_up |
| MRPL47  | COSTIM_up |
| TRA2B   | COSTIM_up |
| EPRS1   | COSTIM_up |
| IL10    | COSTIM_up |
| RPS6KC1 | COSTIM_up |
| CBWD2   | COSTIM_up |
| IL36G   | COSTIM_up |
| SMPD4   | COSTIM_up |
| WDR33   | COSTIM_up |
| IMP4    | COSTIM_up |
| HS6ST1  | COSTIM_up |
| UGGT1   | COSTIM_up |
| GYPC    | COSTIM_up |
| ABI1    | COSTIM_up |
| YME1L1  | COSTIM_up |
| TXN     | COSTIM_up |
| ODF2    | COSTIM_up |
| ECPAS   | COSTIM_up |
| C9orf78 | COSTIM_up |
| SMC2    | COSTIM_up |
| TOR1A   | COSTIM_up |
| SLC2A8  | COSTIM_up |
| PRPF4   | COSTIM_up |
| FPGS    | COSTIM_up |
| TEX10   | COSTIM_up |
| MRPL50  | COSTIM_up |
| DPM2    | COSTIM_up |
| WDR38   | COSTIM_up |
| TSTD2   | COSTIM_up |
| PSMB7   | COSTIM_up |
| RABEPK  | COSTIM_up |
| ANP32B  | COSTIM_up |
| RPL35   | COSTIM_up |
| ARPC5L  | COSTIM_up |
| DERL1   | COSTIM_up |
| MYC     | COSTIM_up |
| DMAC1   | COSTIM_up |

|         |           |
|---------|-----------|
| POLR1E  | COSTIM_up |
| PLAA    | COSTIM_up |
| UBAP2   | COSTIM_up |
| APTX    | COSTIM_up |
| TLN1    | COSTIM_up |
| DNAJB5  | COSTIM_up |
| DCTN3   | COSTIM_up |
| GRHPR   | COSTIM_up |
| ALDH1B1 | COSTIM_up |
| DENND4C | COSTIM_up |
| RPS6    | COSTIM_up |
| FOXP4   | COSTIM_up |
| PPIL1   | COSTIM_up |
| PIM1    | COSTIM_up |
| CMTR1   | COSTIM_up |
| TMEM14B | COSTIM_up |
| TMEM63B | COSTIM_up |
| TJAP1   | COSTIM_up |
| IRF4    | COSTIM_up |
| TUBB2A  | COSTIM_up |
| TUBB2B  | COSTIM_up |
| UQCC2   | COSTIM_up |
| HMGA1   | COSTIM_up |
| IER3    | COSTIM_up |
| MDC1    | COSTIM_up |
| ATAT1   | COSTIM_up |
| MTCH1   | COSTIM_up |
| VARS2   | COSTIM_up |
| CPEB2   | COSTIM_up |
| THAP12  | COSTIM_up |
| LRRC32  | COSTIM_up |
| NARS2   | COSTIM_up |
| RNF121  | COSTIM_up |
| MRPL15  | COSTIM_up |
| GGH     | COSTIM_up |
| SLC05A1 | COSTIM_up |
| TGS1    | COSTIM_up |
| SDCBP   | COSTIM_up |
| BUD13   | COSTIM_up |
| DCUN1D5 | COSTIM_up |
| SLC37A4 | COSTIM_up |
| RDX     | COSTIM_up |
| C11orf1 | COSTIM_up |
| CASP1   | COSTIM_up |
| ALKBH8  | COSTIM_up |
| SQOR    | COSTIM_up |
| SLTM    | COSTIM_up |
| NDUFAF1 | COSTIM_up |
| HAUS2   | COSTIM_up |
| RPLP1   | COSTIM_up |



|         |           |
|---------|-----------|
| TUBGCP4 | COSTIM_up |
| RMDN3   | COSTIM_up |
| RSL24D1 | COSTIM_up |
| BCAR3   | COSTIM_up |
| GTF2B   | COSTIM_up |
| RABGGTB | COSTIM_up |
| IFI44L  | COSTIM_up |
| RTCA    | COSTIM_up |
| SELENOI | COSTIM_up |
| HADHB   | COSTIM_up |
| ADCY3   | COSTIM_up |
| PNPT1   | COSTIM_up |
| THUMPD2 | COSTIM_up |
| RAB1A   | COSTIM_up |
| ACTR2   | COSTIM_up |
| PREB    | COSTIM_up |
| SLC5A6  | COSTIM_up |
| ATRAID  | COSTIM_up |
| CENPO   | COSTIM_up |
| LRPPRC  | COSTIM_up |
| ACTR1A  | COSTIM_up |
| ATAD1   | COSTIM_up |
| DUSP5   | COSTIM_up |
| DBR1    | COSTIM_up |
| ANXA7   | COSTIM_up |
| ZNF365  | COSTIM_up |
| RPS24   | COSTIM_up |
| ATIC    | COSTIM_up |
| ASNSD1  | COSTIM_up |
| METTL5  | COSTIM_up |
| SSB     | COSTIM_up |
| PPIG    | COSTIM_up |
| FASTKD1 | COSTIM_up |
| OLA1    | COSTIM_up |
| WDR12   | COSTIM_up |
| COX17   | COSTIM_up |
| PARP9   | COSTIM_up |
| SPPL2A  | COSTIM_up |
| SHF     | COSTIM_up |
| INTS14  | COSTIM_up |
| PPCDC   | COSTIM_up |
| SEMA7A  | COSTIM_up |
| AP1AR   | COSTIM_up |
| COPS4   | COSTIM_up |
| HNRNPD  | COSTIM_up |
| SEC31A  | COSTIM_up |
| LARP1B  | COSTIM_up |
| NUP54   | COSTIM_up |
| CXCL9   | COSTIM_up |
| BMP2K   | COSTIM_up |

|          |           |
|----------|-----------|
| G3BP2    | COSTIM_up |
| SEPTIN11 | COSTIM_up |
| USO1     | COSTIM_up |
| PPA2     | COSTIM_up |
| GSTCD    | COSTIM_up |
| INTS12   | COSTIM_up |
| SEC24B   | COSTIM_up |
| RNF185   | COSTIM_up |
| KIF21A   | COSTIM_up |
| CPNE8    | COSTIM_up |
| YARS2    | COSTIM_up |
| SINHCAF  | COSTIM_up |
| AEBP2    | COSTIM_up |
| ETNK1    | COSTIM_up |
| ZCRB1    | COSTIM_up |
| NDUFA9   | COSTIM_up |
| PEX5     | COSTIM_up |
| AMIG02   | COSTIM_up |
| LLPH     | COSTIM_up |
| SNRPF    | COSTIM_up |
| ASCL1    | COSTIM_up |
| SLC15A4  | COSTIM_up |
| TDG      | COSTIM_up |
| RITA1    | COSTIM_up |
| MMAB     | COSTIM_up |
| GLTP     | COSTIM_up |
| NUP58    | COSTIM_up |
| MTMR6    | COSTIM_up |
| SLC7A1   | COSTIM_up |
| TARBP2   | COSTIM_up |
| NABP2    | COSTIM_up |
| KANSL2   | COSTIM_up |
| C12orf10 | COSTIM_up |
| TMBIM6   | COSTIM_up |
| ANKRD52  | COSTIM_up |
| ESD      | COSTIM_up |
| SBN01    | COSTIM_up |
| SETD1B   | COSTIM_up |
| VPS33A   | COSTIM_up |
| RHOF     | COSTIM_up |
| DENR     | COSTIM_up |
| RBM26    | COSTIM_up |
| ZIC5     | COSTIM_up |
| CUL4A    | COSTIM_up |
| TMX1     | COSTIM_up |
| NAA30    | COSTIM_up |
| WDR89    | COSTIM_up |
| WARS1    | COSTIM_up |
| NIPA2    | COSTIM_up |
| MFAP1    | COSTIM_up |

|          |           |
|----------|-----------|
| SORD     | COSTIM_up |
| SERF2    | COSTIM_up |
| ZSCAN29  | COSTIM_up |
| BNIP2    | COSTIM_up |
| GTF2A2   | COSTIM_up |
| SRP14    | COSTIM_up |
| BAHD1    | COSTIM_up |
| ANP32A   | COSTIM_up |
| ETFA     | COSTIM_up |
| BCL2A1   | COSTIM_up |
| WDR61    | COSTIM_up |
| MAN2C1   | COSTIM_up |
| DNAJA4   | COSTIM_up |
| TLNRD1   | COSTIM_up |
| PML      | COSTIM_up |
| CYP1A1   | COSTIM_up |
| CELF6    | COSTIM_up |
| SCAMP2   | COSTIM_up |
| HAPLN3   | COSTIM_up |
| POLG     | COSTIM_up |
| ABHD2    | COSTIM_up |
| ZNF710   | COSTIM_up |
| UNC45A   | COSTIM_up |
| SEC11A   | COSTIM_up |
| GLYR1    | COSTIM_up |
| PMM2     | COSTIM_up |
| ARMC5    | COSTIM_up |
| UQCRC2   | COSTIM_up |
| ARHGAP17 | COSTIM_up |
| DHX38    | COSTIM_up |
| TXNL4B   | COSTIM_up |
| CPNE2    | COSTIM_up |
| NLRC5    | COSTIM_up |
| KATNB1   | COSTIM_up |
| GCSH     | COSTIM_up |
| MAP1LC3B | COSTIM_up |
| RHOT2    | COSTIM_up |
| RPS2     | COSTIM_up |
| NDUFB10  | COSTIM_up |
| COPS3    | COSTIM_up |
| MYOCD    | COSTIM_up |
| KSR1     | COSTIM_up |
| UTP4     | COSTIM_up |
| GFOD2    | COSTIM_up |
| NOB1     | COSTIM_up |
| C17orf80 | COSTIM_up |
| VPS53    | COSTIM_up |
| NPEPPS   | COSTIM_up |
| G6PC3    | COSTIM_up |
| CLTC     | COSTIM_up |

|          |           |
|----------|-----------|
| PTRH2    | COSTIM_up |
| TAF4B    | COSTIM_up |
| AFG3L2   | COSTIM_up |
| SLC39A6  | COSTIM_up |
| C18orf21 | COSTIM_up |
| GALNT1   | COSTIM_up |
| PELP1    | COSTIM_up |
| WRAP53   | COSTIM_up |
| PIK3R5   | COSTIM_up |
| TP53     | COSTIM_up |
| ARHGDI A | COSTIM_up |
| EIF4A3   | COSTIM_up |
| ANAPC11  | COSTIM_up |
| RPTOR    | COSTIM_up |
| FOXK2    | COSTIM_up |
| TRIM65   | COSTIM_up |
| RNF157   | COSTIM_up |
| CEP131   | COSTIM_up |
| WDR45B   | COSTIM_up |
| DYM      | COSTIM_up |
| MBD1     | COSTIM_up |
| PMAIP1   | COSTIM_up |
| NT5C3B   | COSTIM_up |
| MIEN1    | COSTIM_up |
| TXNL4A   | COSTIM_up |
| SAMD1    | COSTIM_up |
| BRD4     | COSTIM_up |
| SLC39A3  | COSTIM_up |
| NFIC     | COSTIM_up |
| PRDM15   | COSTIM_up |
| FEM1A    | COSTIM_up |
| DUS3L    | COSTIM_up |
| DPP9     | COSTIM_up |
| CCDC97   | COSTIM_up |
| HUNK     | COSTIM_up |
| SOD1     | COSTIM_up |
| SCYL1    | COSTIM_up |
| APP      | COSTIM_up |
| URB1     | COSTIM_up |
| AKT1     | COSTIM_up |
| EMP3     | COSTIM_up |
| SAE1     | COSTIM_up |
| GEMIN7   | COSTIM_up |
| CAPN10   | COSTIM_up |
| ERVK3-1  | COSTIM_up |
| ZNF787   | COSTIM_up |
| CARM1    | COSTIM_up |
| PSMB6    | COSTIM_up |
| ACP4     | COSTIM_up |
| ZNF473   | COSTIM_up |

|          |           |
|----------|-----------|
| RPL13A   | COSTIM_up |
| CTU1     | COSTIM_up |
| NOSIP    | COSTIM_up |
| ZNF614   | COSTIM_up |
| EFHD2    | COSTIM_up |
| PEX14    | COSTIM_up |
| PGD      | COSTIM_up |
| RPL11    | COSTIM_up |
| ZNF593   | COSTIM_up |
| C1orf216 | COSTIM_up |
| GPN2     | COSTIM_up |
| SERBP1   | COSTIM_up |
| RPS8     | COSTIM_up |
| IGSF3    | COSTIM_up |
| STRIP1   | COSTIM_up |
| PSMA5    | COSTIM_up |
| ITGA10   | COSTIM_up |
| TIPRL    | COSTIM_up |
| POGK     | COSTIM_up |
| UCK2     | COSTIM_up |
| TMC01    | COSTIM_up |
| UFC1     | COSTIM_up |
| SDHC     | COSTIM_up |
| PFDN2    | COSTIM_up |
| PRCC     | COSTIM_up |
| MRPL24   | COSTIM_up |
| ISG20L2  | COSTIM_up |
| CRABP2   | COSTIM_up |
| HDGF     | COSTIM_up |
| ABL2     | COSTIM_up |
| RGS16    | COSTIM_up |
| RGL1     | COSTIM_up |
| SF3B4    | COSTIM_up |
| TARS2    | COSTIM_up |
| SETDB1   | COSTIM_up |
| MCL1     | COSTIM_up |
| RFX5     | COSTIM_up |
| PIP5K1A  | COSTIM_up |
| ANP32E   | COSTIM_up |
| CERS2    | COSTIM_up |
| ENSA     | COSTIM_up |
| MRPL9    | COSTIM_up |
| DTL      | COSTIM_up |
| EIF2D    | COSTIM_up |
| INTS7    | COSTIM_up |
| TAF1A    | COSTIM_up |
| DUSP10   | COSTIM_up |
| HHIPL2   | COSTIM_up |
| TP53BP2  | COSTIM_up |
| ADAM15   | COSTIM_up |

|           |           |
|-----------|-----------|
| JTB       | COSTIM_up |
| RAB13     | COSTIM_up |
| TPM3      | COSTIM_up |
| NUP210L   | COSTIM_up |
| SNAPIN    | COSTIM_up |
| UBAP2L    | COSTIM_up |
| SLC39A1   | COSTIM_up |
| HAX1      | COSTIM_up |
| C1orf43   | COSTIM_up |
| ILF2      | COSTIM_up |
| RIT1      | COSTIM_up |
| INTS3     | COSTIM_up |
| FLG       | COSTIM_up |
| GALNT2    | COSTIM_up |
| SCCPDH    | COSTIM_up |
| ACP1      | COSTIM_up |
| SNAP47    | COSTIM_up |
| SRP9      | COSTIM_up |
| SDE2      | COSTIM_up |
| ARF1      | COSTIM_up |
| ITPKB     | COSTIM_up |
| GUK1      | COSTIM_up |
| C1orf35   | COSTIM_up |
| PARP1     | COSTIM_up |
| PYCR2     | COSTIM_up |
| ARL8A     | COSTIM_up |
| PDIA6     | COSTIM_up |
| EML4      | COSTIM_up |
| CALM2     | COSTIM_up |
| CHAC2     | COSTIM_up |
| RPS27A    | COSTIM_up |
| VPS54     | COSTIM_up |
| SNRPG     | COSTIM_up |
| CIA01     | COSTIM_up |
| SNRNP200  | COSTIM_up |
| MRPS5     | COSTIM_up |
| TPRKB     | COSTIM_up |
| TEX261    | COSTIM_up |
| TMEM177   | COSTIM_up |
| NT5DC4    | COSTIM_up |
| SLC20A1   | COSTIM_up |
| ZC3H8     | COSTIM_up |
| UBXN4     | COSTIM_up |
| SPOPL     | COSTIM_up |
| POLR2D    | COSTIM_up |
| AMMECR1L  | COSTIM_up |
| LNPB      | COSTIM_up |
| CDCA7     | COSTIM_up |
| HSPD1     | COSTIM_up |
| METTTL21A | COSTIM_up |

|          |           |
|----------|-----------|
| COPS7B   | COSTIM_up |
| DIS3L2   | COSTIM_up |
| TAMM41   | COSTIM_up |
| RETREG2  | COSTIM_up |
| CNOT9    | COSTIM_up |
| GMPPA    | COSTIM_up |
| EAF1     | COSTIM_up |
| DYNC1LI1 | COSTIM_up |
| GOLGA4   | COSTIM_up |
| IQSEC1   | COSTIM_up |
| CAND2    | COSTIM_up |
| RPL32    | COSTIM_up |
| SHQ1     | COSTIM_up |
| SLC25A26 | COSTIM_up |
| UBA3     | COSTIM_up |
| LRIG1    | COSTIM_up |
| NFKBIZ   | COSTIM_up |
| PLA1A    | COSTIM_up |
| RABL3    | COSTIM_up |
| ADPRH    | COSTIM_up |
| ATG3     | COSTIM_up |
| NR1I2    | COSTIM_up |
| SRPRB    | COSTIM_up |
| EIF2A    | COSTIM_up |
| DCAF1    | COSTIM_up |
| MANF     | COSTIM_up |
| EIF2B5   | COSTIM_up |
| FIP1L1   | COSTIM_up |
| LYAR     | COSTIM_up |
| ENOPH1   | COSTIM_up |
| TRMT10A  | COSTIM_up |
| PYURF    | COSTIM_up |
| CISD2    | COSTIM_up |
| ANK2     | COSTIM_up |
| TIFA     | COSTIM_up |
| SPATA5   | COSTIM_up |
| METTL14  | COSTIM_up |
| SETD7    | COSTIM_up |
| NAF1     | COSTIM_up |
| RPS3A    | COSTIM_up |
| NDUFS6   | COSTIM_up |
| RPL37    | COSTIM_up |
| PPIP5K2  | COSTIM_up |
| BDP1     | COSTIM_up |
| GTF2H2   | COSTIM_up |
| SLC30A5  | COSTIM_up |
| BTF3     | COSTIM_up |
| TNFAIP8  | COSTIM_up |
| FEM1C    | COSTIM_up |
| YIPF5    | COSTIM_up |

|          |           |
|----------|-----------|
| DDX46    | COSTIM_up |
| RNF145   | COSTIM_up |
| GLRA1    | COSTIM_up |
| TNIP1    | COSTIM_up |
| G3BP1    | COSTIM_up |
| NHP2     | COSTIM_up |
| RMND5B   | COSTIM_up |
| BOD1     | COSTIM_up |
| TBC1D7   | COSTIM_up |
| FARS2    | COSTIM_up |
| CDKAL1   | COSTIM_up |
| ZMAT2    | COSTIM_up |
| TRIM41   | COSTIM_up |
| HIGD2A   | COSTIM_up |
| ABT1     | COSTIM_up |
| RPL7L1   | COSTIM_up |
| NFKBIE   | COSTIM_up |
| PM20D2   | COSTIM_up |
| ABRACL   | COSTIM_up |
| AIG1     | COSTIM_up |
| DYNLT1   | COSTIM_up |
| WTAP     | COSTIM_up |
| ZMYM4    | COSTIM_up |
| ARMT1    | COSTIM_up |
| CCZ1B    | COSTIM_up |
| CREB5    | COSTIM_up |
| CDCA5    | COSTIM_up |
| PURB     | COSTIM_up |
| MDH2     | COSTIM_up |
| POMZP3   | COSTIM_up |
| NIPSNAP2 | COSTIM_up |
| CCT6A    | COSTIM_up |
| PSPH     | COSTIM_up |
| GIGYF1   | COSTIM_up |
| MEPCE    | COSTIM_up |
| NOM1     | COSTIM_up |
| NLGN4X   | COSTIM_up |
| LUC7L2   | COSTIM_up |
| SH3KBP1  | COSTIM_up |
| CHST7    | COSTIM_up |
| NDUFB11  | COSTIM_up |
| NONO     | COSTIM_up |
| EBP      | COSTIM_up |
| SNX12    | COSTIM_up |
| IL2RG    | COSTIM_up |
| PRPS1    | COSTIM_up |
| RBMX     | COSTIM_up |
| NSDHL    | COSTIM_up |
| CETN2    | COSTIM_up |
| RPL10    | COSTIM_up |



ATP6V1B2 COSTIM\_up  
CCDC25 COSTIM\_up  
CHRNA6 COSTIM\_up  
BIN3 COSTIM\_up  
SLC25A37 COSTIM\_up  
PLPBP COSTIM\_up  
TACC1 COSTIM\_up  
GOLGA7 COSTIM\_up  
MRPS28 COSTIM\_up  
LACTB2 COSTIM\_up  
RPL7 COSTIM\_up  
MTDH COSTIM\_up  
EBAG9 COSTIM\_up  
POLR2K COSTIM\_up  
EIF3H COSTIM\_up  
NDUFB9 COSTIM\_up  
TATDN1 COSTIM\_up  
ZNF7 COSTIM\_up  
ARHGAP39 COSTIM\_up  
SLC39A4 COSTIM\_up  
VLDLR COSTIM\_up  
PLIN2 COSTIM\_up  
HAUS6 COSTIM\_up  
SIGMAR1 COSTIM\_up  
CBWD5 COSTIM\_up  
CEP78 COSTIM\_up  
NTRK2 COSTIM\_up  
MFSD14B COSTIM\_up  
INIP COSTIM\_up  
UGCG COSTIM\_up  
STOM COSTIM\_up  
MRRF COSTIM\_up  
NR6A1 COSTIM\_up  
POLE3 COSTIM\_up  
SURF4 COSTIM\_up  
GBGT1 COSTIM\_up  
SURF2 COSTIM\_up  
SURF6 COSTIM\_up  
MED22 COSTIM\_up  
REX04 COSTIM\_up  
RPL7A COSTIM\_up  
GTF3C5 COSTIM\_up  
ASB6 COSTIM\_up  
PTGES2 COSTIM\_up  
NTMT1 COSTIM\_up  
CIZ1 COSTIM\_up  
SLC25A25 COSTIM\_up  
LRSAM1 COSTIM\_up  
PAXX COSTIM\_up  
INPP5E COSTIM\_up

SEC16A COSTIM\_up  
DPH7 COSTIM\_up  
PDSS1 COSTIM\_up  
FAM171A1 COSTIM\_up  
RSU1 COSTIM\_up  
NRBF2 COSTIM\_up  
POLR3A COSTIM\_up  
GLUD1 COSTIM\_up  
RPP30 COSTIM\_up  
DNAJB12 COSTIM\_up  
EIF4EBP2 COSTIM\_up  
TCF7L2 COSTIM\_up  
MKI67 COSTIM\_up  
FUOM COSTIM\_up  
MTG1 COSTIM\_up  
GSTO1 COSTIM\_up  
PPRC1 COSTIM\_up  
PDCD11 COSTIM\_up  
ADAM12 COSTIM\_up  
RGS10 COSTIM\_up  
LIN7C COSTIM\_up  
PGAP2 COSTIM\_up  
HSD17B12 COSTIM\_up  
APIP COSTIM\_up  
DGKZ COSTIM\_up  
EIF3M COSTIM\_up  
TNKS1BP1 COSTIM\_up  
SSRP1 COSTIM\_up  
SLC43A1 COSTIM\_up  
ARFGAP2 COSTIM\_up  
CELF1 COSTIM\_up  
HIKESHI COSTIM\_up  
SERPINH1 COSTIM\_up  
PAK1 COSTIM\_up  
RPS3 COSTIM\_up  
ZC3H12C COSTIM\_up  
AASDHPPT COSTIM\_up  
GLB1L2 COSTIM\_up  
LAMTOR1 COSTIM\_up  
HYOU1 COSTIM\_up  
KAT14 COSTIM\_up  
MTA2 COSTIM\_up  
TMEM138 COSTIM\_up  
FADS1 COSTIM\_up  
EML3 COSTIM\_up  
ZP1 COSTIM\_up  
CPSF7 COSTIM\_up  
B3GAT3 COSTIM\_up  
EI24 COSTIM\_up  
CHEK1 COSTIM\_up

|           |           |
|-----------|-----------|
| FEZ1      | COSTIM_up |
| ESAM      | COSTIM_up |
| COMMD7    | COSTIM_up |
| YTHDF1    | COSTIM_up |
| CABLES2   | COSTIM_up |
| FERMT3    | COSTIM_up |
| MRPL49    | COSTIM_up |
| FAU       | COSTIM_up |
| VPS51     | COSTIM_up |
| PPP4C     | COSTIM_up |
| ALDOA     | COSTIM_up |
| HIRIP3    | COSTIM_up |
| TAOK2     | COSTIM_up |
| HMGA2     | COSTIM_up |
| CWC15     | COSTIM_up |
| EEF1AKMT1 | COSTIM_up |
| SAP18     | COSTIM_up |
| PDCD4     | COSTIM_up |
| WDR17     | COSTIM_up |
| CD226     | COSTIM_up |
| MTMR12    | COSTIM_up |
| CCT5      | COSTIM_up |
| ATP5CKMT  | COSTIM_up |
| DLAT      | COSTIM_up |
| NKAPD1    | COSTIM_up |
| TIMM8B    | COSTIM_up |
| SEC24D    | COSTIM_up |
| RILPL2    | COSTIM_up |
| DHX37     | COSTIM_up |
| UBC       | COSTIM_up |
| SLC7A11   | COSTIM_up |
| NOCT      | COSTIM_up |
| DCP1B     | COSTIM_up |
| UEVLD     | COSTIM_up |
| C12orf45  | COSTIM_up |
| PLBD2     | COSTIM_up |
| TWF1      | COSTIM_up |
| EIF4E     | COSTIM_up |
| TEX30     | COSTIM_up |
| SRFBP1    | COSTIM_up |
| FAM177A1  | COSTIM_up |
| MBIP      | COSTIM_up |
| TMEM18    | COSTIM_up |
| NDUFC2    | COSTIM_up |
| ANKRD50   | COSTIM_up |
| UPF2      | COSTIM_up |
| CDC123    | COSTIM_up |
| SCLT1     | COSTIM_up |
| VTI1A     | COSTIM_up |
| TEX9      | COSTIM_up |

|          |           |
|----------|-----------|
| QTRT2    | COSTIM_up |
| MMAA     | COSTIM_up |
| POU4F2   | COSTIM_up |
| CENPU    | COSTIM_up |
| ACSL1    | COSTIM_up |
| SLC25A4  | COSTIM_up |
| SAV1     | COSTIM_up |
| NBAS     | COSTIM_up |
| GUF1     | COSTIM_up |
| SACS     | COSTIM_up |
| FBX04    | COSTIM_up |
| CACUL1   | COSTIM_up |
| BAG3     | COSTIM_up |
| AP1S3    | COSTIM_up |
| MZT2B    | COSTIM_up |
| FAM168B  | COSTIM_up |
| GEMIN6   | COSTIM_up |
| OBI1     | COSTIM_up |
| ARL14EP  | COSTIM_up |
| ATP5F1A  | COSTIM_up |
| UHMK1    | COSTIM_up |
| HOMER1   | COSTIM_up |
| SUV39H2  | COSTIM_up |
| RPP38    | COSTIM_up |
| USP12    | COSTIM_up |
| CCDC50   | COSTIM_up |
| PFKM     | COSTIM_up |
| TMEM123  | COSTIM_up |
| SPEF2    | COSTIM_up |
| SPARCL1  | COSTIM_up |
| NADK2    | COSTIM_up |
| GPD1L    | COSTIM_up |
| SLC30A6  | COSTIM_up |
| PELO     | COSTIM_up |
| GPR180   | COSTIM_up |
| HNRNPD   | COSTIM_up |
| CNTNAP4  | COSTIM_up |
| SREK1IP1 | COSTIM_up |
| CWC27    | COSTIM_up |
| SRP19    | COSTIM_up |
| CENPH    | COSTIM_up |
| TEKT5    | COSTIM_up |
| ANAPC1   | COSTIM_up |
| CAST     | COSTIM_up |
| SCOC     | COSTIM_up |
| CETN3    | COSTIM_up |
| SMARCA5  | COSTIM_up |
| HNRNPU   | COSTIM_up |
| RANBP2   | COSTIM_up |
| AHCTF1   | COSTIM_up |

|          |           |
|----------|-----------|
| ADGRF1   | COSTIM_up |
| FAM49B   | COSTIM_up |
| ASAP1    | COSTIM_up |
| LPCAT1   | COSTIM_up |
| TMEM251  | COSTIM_up |
| UBP1     | COSTIM_up |
| RPIA     | COSTIM_up |
| GTF2E1   | COSTIM_up |
| CFDP1    | COSTIM_up |
| JAZF1    | COSTIM_up |
| TRIP12   | COSTIM_up |
| CEBPG    | COSTIM_up |
| KCTD15   | COSTIM_up |
| MCOLN2   | COSTIM_up |
| SREK1    | COSTIM_up |
| ZUP1     | COSTIM_up |
| NUS1     | COSTIM_up |
| PPP2R5E  | COSTIM_up |
| CABYR    | COSTIM_up |
| IMPACT   | COSTIM_up |
| OTULIN   | COSTIM_up |
| ROB03    | COSTIM_up |
| GPR15    | COSTIM_up |
| TOMM70   | COSTIM_up |
| CC2D1B   | COSTIM_up |
| ABCA6    | COSTIM_up |
| ABCA5    | COSTIM_up |
| UCHL1    | COSTIM_up |
| NEIL2    | COSTIM_up |
| LONRF1   | COSTIM_up |
| SH3RF1   | COSTIM_up |
| BUB3     | COSTIM_up |
| DIPK1A   | COSTIM_up |
| ATP5MC3  | COSTIM_up |
| ELOC     | COSTIM_up |
| C21orf91 | COSTIM_up |
| L3MBTL4  | COSTIM_up |
| RABGEF1  | COSTIM_up |
| MRPL39   | COSTIM_up |
| ATP5PF   | COSTIM_up |
| GABPA    | COSTIM_up |
| TSEN2    | COSTIM_up |
| DPH3     | COSTIM_up |
| OXNAD1   | COSTIM_up |
| PLCL2    | COSTIM_up |
| CXXC1    | COSTIM_up |
| USP43    | COSTIM_up |
| EPHB1    | COSTIM_up |
| ANKRD40  | COSTIM_up |
| VOPP1    | COSTIM_up |

|          |           |
|----------|-----------|
| AP00L    | COSTIM_up |
| FBXL18   | COSTIM_up |
| KLF10    | COSTIM_up |
| AZIN1    | COSTIM_up |
| OTUD6B   | COSTIM_up |
| GTF3C6   | COSTIM_up |
| MMS19    | COSTIM_up |
| PI4K2A   | COSTIM_up |
| TRMT44   | COSTIM_up |
| HSPA13   | COSTIM_up |
| SAMSN1   | COSTIM_up |
| C16orf87 | COSTIM_up |
| DBI      | COSTIM_up |
| SLC16A1  | COSTIM_up |
| HEATR3   | COSTIM_up |
| NIFK     | COSTIM_up |
| OXA1L    | COSTIM_up |
| LARP1    | COSTIM_up |
| MIER3    | COSTIM_up |
| NUP205   | COSTIM_up |
| ZKSCAN2  | COSTIM_up |
| PDIA4    | COSTIM_up |
| RNF20    | COSTIM_up |
| PPARGC1B | COSTIM_up |
| ELM01    | COSTIM_up |
| RRAGA    | COSTIM_up |
| RMND1    | COSTIM_up |
| VBP1     | COSTIM_up |
| RAB39B   | COSTIM_up |
| CLIC2    | COSTIM_up |
| GRIP1    | COSTIM_up |
| CARNMT1  | COSTIM_up |
| KCNMA1   | COSTIM_up |
| BATF     | COSTIM_up |
| N6AMT1   | COSTIM_up |
| USP16    | COSTIM_up |
| CCT8     | COSTIM_up |
| TSPAN7   | COSTIM_up |
| TIAM1    | COSTIM_up |
| SCAF4    | COSTIM_up |
| SFXN2    | COSTIM_up |
| ATP5MPL  | COSTIM_up |
| UQCRB    | COSTIM_up |
| MTERF3   | COSTIM_up |
| RPL30    | COSTIM_up |
| SUPV3L1  | COSTIM_up |
| EEF1A1   | COSTIM_up |
| HK1      | COSTIM_up |
| CD109    | COSTIM_up |
| UBE2L6   | COSTIM_up |

|           |           |
|-----------|-----------|
| ZDHC5     | COSTIM_up |
| MED19     | COSTIM_up |
| ZFAND3    | COSTIM_up |
| NPTN      | COSTIM_up |
| UTP14A    | COSTIM_up |
| AIFM1     | COSTIM_up |
| MAPK13    | COSTIM_up |
| ZNF689    | COSTIM_up |
| PRR14     | COSTIM_up |
| FBR5      | COSTIM_up |
| MFSD14A   | COSTIM_up |
| SASS6     | COSTIM_up |
| MALSU1    | COSTIM_up |
| LHFPL4    | COSTIM_up |
| B3GNT7    | COSTIM_up |
| EIF4A2    | COSTIM_up |
| BRPF1     | COSTIM_up |
| RPUSD3    | COSTIM_up |
| TATDN2    | COSTIM_up |
| SEC13     | COSTIM_up |
| ZFYVE9    | COSTIM_up |
| SMG1      | COSTIM_up |
| NECAP2    | COSTIM_up |
| LRP8      | COSTIM_up |
| PAXIP1    | COSTIM_up |
| ZFHX2-AS1 | COSTIM_up |
| FAM81A    | COSTIM_up |
| MYO1E     | COSTIM_up |
| VPS26C    | COSTIM_up |
| ETS2      | COSTIM_up |
| SLC35B2   | COSTIM_up |
| TMEM164   | COSTIM_up |
| C2CD2     | COSTIM_up |
| TAB3      | COSTIM_up |
| SLC38A10  | COSTIM_up |
| TMEM268   | COSTIM_up |
| ACAN      | COSTIM_up |
| PSMG3     | COSTIM_up |
| GAREM2    | COSTIM_up |
| PRXL2B    | COSTIM_up |
| TNFRSF14  | COSTIM_up |
| C12orf43  | COSTIM_up |
| PEX10     | COSTIM_up |
| RER1      | COSTIM_up |
| BABAM2    | COSTIM_up |
| WDR66     | COSTIM_up |
| MRPL17    | COSTIM_up |
| DUSP2     | COSTIM_up |
| GALNT14   | COSTIM_up |
| FANCC     | COSTIM_up |

|          |           |
|----------|-----------|
| FAIM     | COSTIM_up |
| RNF207   | COSTIM_up |
| GPR153   | COSTIM_up |
| MITD1    | COSTIM_up |
| EIF5B    | COSTIM_up |
| CNOT11   | COSTIM_up |
| TSPAN33  | COSTIM_up |
| B4GALT5  | COSTIM_up |
| SPATA2   | COSTIM_up |
| FAM86C1  | COSTIM_up |
| TSR2     | COSTIM_up |
| ZC3H18   | COSTIM_up |
| TMED4    | COSTIM_up |
| PPP1R15B | COSTIM_up |
| COPG2    | COSTIM_up |
| GPAT4    | COSTIM_up |
| TAGLN2   | COSTIM_up |
| SLC45A3  | COSTIM_up |
| DUSP23   | COSTIM_up |
| NIT1     | COSTIM_up |
| DEDD     | COSTIM_up |
| ZNF276   | COSTIM_up |
| NDUFS2   | COSTIM_up |
| TOMM40L  | COSTIM_up |
| CCAR2    | COSTIM_up |
| MIS18A   | COSTIM_up |
| ALG8     | COSTIM_up |
| FBXW5    | COSTIM_up |
| CFAP298  | COSTIM_up |
| PAXBP1   | COSTIM_up |
| MRPL10   | COSTIM_up |
| IFNGR2   | COSTIM_up |
| GART     | COSTIM_up |
| SON      | COSTIM_up |
| CSRP1    | COSTIM_up |
| ATP5MC1  | COSTIM_up |
| UBE2Z    | COSTIM_up |
| SNF8     | COSTIM_up |
| CBR1     | COSTIM_up |
| CHAF1B   | COSTIM_up |
| PTMS     | COSTIM_up |
| ADIPOR1  | COSTIM_up |
| CYB5R1   | COSTIM_up |
| PSMD4    | COSTIM_up |
| PSMB4    | COSTIM_up |
| HK2      | COSTIM_up |
| ALDH4A1  | COSTIM_up |
| THEM4    | COSTIM_up |
| MED8     | COSTIM_up |
| GPBP1L1  | COSTIM_up |



NAE1 COSTIM\_up  
TMEM69 COSTIM\_up  
EFCAB14 COSTIM\_up  
CHCHD6 COSTIM\_up  
CTBP1 COSTIM\_up  
ATP6V0D1 COSTIM\_up  
CARMIL2 COSTIM\_up  
PIP COSTIM\_up  
ZYG COSTIM\_up  
CCDC117 COSTIM\_up  
GNE COSTIM\_up  
PTGIR COSTIM\_up  
CALM3 COSTIM\_up  
DFFA COSTIM\_up  
CCDC28B COSTIM\_up  
ATAD3B COSTIM\_up  
SSU72 COSTIM\_up  
UBE2J2 COSTIM\_up  
CCDC58 COSTIM\_up  
VMA21 COSTIM\_up  
FAM86C2P COSTIM\_up  
WDR4 COSTIM\_up  
NDUFV3 COSTIM\_up  
CBS COSTIM\_up  
U2AF1 COSTIM\_up  
HSF2BP COSTIM\_up  
RRP1B COSTIM\_up  
PDXK COSTIM\_up  
G6PD COSTIM\_up  
CSTB COSTIM\_up  
RRP1 COSTIM\_up  
AGPAT3 COSTIM\_up  
TRAPPC10 COSTIM\_up  
ITGB2 COSTIM\_up  
FAM207A COSTIM\_up  
RALGDS COSTIM\_up  
SPATC1L COSTIM\_up  
LSS COSTIM\_up  
VAV2 COSTIM\_up  
MCM3AP COSTIM\_up  
PCNT COSTIM\_up  
SLC2A6 COSTIM\_up  
C19orf47 COSTIM\_up  
CFAP157 COSTIM\_up  
TOR2A COSTIM\_up  
ST6GALNAC6 COSTIM\_up  
SHKBP1 COSTIM\_up  
ZDHHC12 COSTIM\_up  
PKN3 COSTIM\_up  
TAOK1 COSTIM\_up

|          |           |
|----------|-----------|
| MED27    | COSTIM_up |
| TLCD1    | COSTIM_up |
| SAFB     | COSTIM_up |
| CHTOP    | COSTIM_up |
| CXCR5    | COSTIM_up |
| ZBTB7B   | COSTIM_up |
| FLAD1    | COSTIM_up |
| SHC1     | COSTIM_up |
| NLRX1    | COSTIM_up |
| ADAR     | COSTIM_up |
| IL6R     | COSTIM_up |
| UBE2Q1   | COSTIM_up |
| CHRNA2   | COSTIM_up |
| CRTC2    | COSTIM_up |
| FDPS     | COSTIM_up |
| RUSC1    | COSTIM_up |
| FAM189B  | COSTIM_up |
| SLC25A44 | COSTIM_up |
| LMNA     | COSTIM_up |
| NBEAL2   | COSTIM_up |
| CCDC12   | COSTIM_up |
| UBQLN4   | COSTIM_up |
| GPATCH4  | COSTIM_up |
| NACC1    | COSTIM_up |
| CPSF4    | COSTIM_up |
| VPS28    | COSTIM_up |
| TONSL    | COSTIM_up |
| PWWP3A   | COSTIM_up |
| LRRC14   | COSTIM_up |
| PPP1R16A | COSTIM_up |
| SQSTM1   | COSTIM_up |
| MGAT4B   | COSTIM_up |
| RPL8     | COSTIM_up |
| PSMC2    | COSTIM_up |
| MFS12    | COSTIM_up |
| YDJC     | COSTIM_up |
| DVL3     | COSTIM_up |
| AP2M1    | COSTIM_up |
| ABCF3    | COSTIM_up |
| PCYT1A   | COSTIM_up |
| IKZF3    | COSTIM_up |
| GRIN2C   | COSTIM_up |
| SAP30BP  | COSTIM_up |
| SRSF2    | COSTIM_up |
| LSM12    | COSTIM_up |
| EMC10    | COSTIM_up |
| JOSD2    | COSTIM_up |
| FMNL3    | COSTIM_up |
| LARP4    | COSTIM_up |
| RAVER1   | COSTIM_up |

|         |           |
|---------|-----------|
| ZNF653  | COSTIM_up |
| SENP3   | COSTIM_up |
| EIF4A1  | COSTIM_up |
| RPL26   | COSTIM_up |
| POLR3K  | COSTIM_up |
| SNRNP25 | COSTIM_up |
| JMJD8   | COSTIM_up |
| CCDC78  | COSTIM_up |
| TEDC2   | COSTIM_up |
| TBC1D24 | COSTIM_up |
| NTN3    | COSTIM_up |
| FLYWCH2 | COSTIM_up |
| CLPB    | COSTIM_up |
| UBXN1   | COSTIM_up |
| LBHD1   | COSTIM_up |
| TAF6L   | COSTIM_up |
| RPL29   | COSTIM_up |
| CMPK1   | COSTIM_up |
| COA7    | COSTIM_up |
| CZIB    | COSTIM_up |
| MAG0H   | COSTIM_up |
| PARS2   | COSTIM_up |
| NOL9    | COSTIM_up |
| KLHL21  | COSTIM_up |
| GMEB1   | COSTIM_up |
| AK4     | COSTIM_up |
| DHRS3   | COSTIM_up |
| PEF1    | COSTIM_up |
| RBBP4   | COSTIM_up |
| TMC04   | COSTIM_up |
| ALPL    | COSTIM_up |
| WNT4    | COSTIM_up |
| TTLL10  | COSTIM_up |
| FAAP20  | COSTIM_up |
| USP1    | COSTIM_up |
| FUBP1   | COSTIM_up |
| TYW3    | COSTIM_up |
| NTNG1   | COSTIM_up |
| HENMT1  | COSTIM_up |
| C1orf52 | COSTIM_up |
| ATXN7L2 | COSTIM_up |
| ZNF326  | COSTIM_up |
| AGL     | COSTIM_up |
| ZNF281  | COSTIM_up |
| ARPC5   | COSTIM_up |
| PEA15   | COSTIM_up |
| PEX19   | COSTIM_up |
| NCSTN   | COSTIM_up |
| FLVCR1  | COSTIM_up |
| ATF3    | COSTIM_up |

|          |           |
|----------|-----------|
| IER5     | COSTIM_up |
| BPNT1    | COSTIM_up |
| C1orf115 | COSTIM_up |
| TFB2M    | COSTIM_up |
| MRPL55   | COSTIM_up |
| REL      | COSTIM_up |
| MEM01    | COSTIM_up |
| DPY30    | COSTIM_up |
| TYW5     | COSTIM_up |
| MAIP1    | COSTIM_up |
| NUP35    | COSTIM_up |
| CCDC138  | COSTIM_up |
| FBX041   | COSTIM_up |
| WDCP     | COSTIM_up |
| SGCB     | COSTIM_up |
| SPATA18  | COSTIM_up |
| SGPP2    | COSTIM_up |
| SMARCAD1 | COSTIM_up |
| PDLIM5   | COSTIM_up |
| PACRGL   | COSTIM_up |
| SCNM1    | COSTIM_up |
| VPS72    | COSTIM_up |
| ERCC3    | COSTIM_up |
| IWS1     | COSTIM_up |
| BOLA3    | COSTIM_up |
| CDC42EP3 | COSTIM_up |
| S100A11  | COSTIM_up |
| GNPDA2   | COSTIM_up |
| PAQR3    | COSTIM_up |
| MRPS18C  | COSTIM_up |
| CGGBP1   | COSTIM_up |
| PMVK     | COSTIM_up |
| HIPK1    | COSTIM_up |
| YY1AP1   | COSTIM_up |
| EOGT     | COSTIM_up |
| NAXE     | COSTIM_up |
| POGLUT1  | COSTIM_up |
| ATP1A1   | COSTIM_up |
| LRR58    | COSTIM_up |
| TMEM183A | COSTIM_up |
| KRTCAP2  | COSTIM_up |
| ARPC2    | COSTIM_up |
| CCT3     | COSTIM_up |
| RNF25    | COSTIM_up |
| CIP2A    | COSTIM_up |
| CWC22    | COSTIM_up |
| FCRL4    | COSTIM_up |
| STT3B    | COSTIM_up |
| CHCHD4   | COSTIM_up |
| SUCLG1   | COSTIM_up |

EIF5A2 COSTIM\_up  
RPL22L1 COSTIM\_up  
SNHG16 COSTIM\_up  
PPP4R2 COSTIM\_up  
NEPR0 COSTIM\_up  
COX18 COSTIM\_up  
THOC7 COSTIM\_up  
PSMD6 COSTIM\_up  
GMPS COSTIM\_up  
RPL9 COSTIM\_up  
ABHD6 COSTIM\_up  
DNASE1L3 COSTIM\_up  
CRELD1 COSTIM\_up  
PRRT3 COSTIM\_up  
U2SURP COSTIM\_up  
MTHFD2L COSTIM\_up  
CXCL1 COSTIM\_up  
RCHY1 COSTIM\_up  
ZNF513 COSTIM\_up  
SLC4A1AP COSTIM\_up  
KIAA1143 COSTIM\_up  
WDR43 COSTIM\_up  
ZDHHC3 COSTIM\_up  
ELP6 COSTIM\_up  
DTX3L COSTIM\_up  
SMIM12 COSTIM\_up  
TPRA1 COSTIM\_up  
YEATS2 COSTIM\_up  
ZC3H12A COSTIM\_up  
SNIP1 COSTIM\_up  
POLR2H COSTIM\_up  
KLF15 COSTIM\_up  
RPN1 COSTIM\_up  
RFC4 COSTIM\_up  
RPL39L COSTIM\_up  
BAP1 COSTIM\_up  
TKT COSTIM\_up  
PRKCD COSTIM\_up  
RFT1 COSTIM\_up  
GNL3 COSTIM\_up  
PBRM1 COSTIM\_up  
UVSSA COSTIM\_up  
SLBP COSTIM\_up  
LRPAP1 COSTIM\_up  
PIGX COSTIM\_up  
MELTF COSTIM\_up  
EX05 COSTIM\_up  
AIMP1 COSTIM\_up  
METAP1 COSTIM\_up  
H2AZ1 COSTIM\_up

SLC9B2 COSTIM\_up  
PGRMC2 COSTIM\_up  
CDC25A COSTIM\_up  
CCDC51 COSTIM\_up  
ATRIP COSTIM\_up  
BSN COSTIM\_up  
APEH COSTIM\_up  
MON1A COSTIM\_up  
RAD54L2 COSTIM\_up  
WDR82 COSTIM\_up  
SAP30 COSTIM\_up  
ANXA5 COSTIM\_up  
NAA15 COSTIM\_up  
ICE1 COSTIM\_up  
ANAPC10 COSTIM\_up  
ABCE1 COSTIM\_up  
OTUD4 COSTIM\_up  
LSM6 COSTIM\_up  
TMEM184C COSTIM\_up  
TMEM161B COSTIM\_up  
NDUFAF2 COSTIM\_up  
SLC25A46 COSTIM\_up  
ANKRD33B COSTIM\_up  
PRRC1 COSTIM\_up  
AGGF1 COSTIM\_up  
WDR41 COSTIM\_up  
NDUFS4 COSTIM\_up  
GRPEL2 COSTIM\_up  
RH0BTB3 COSTIM\_up  
CASP3 COSTIM\_up  
ERAP1 COSTIM\_up  
CFAP97 COSTIM\_up  
UBLCP1 COSTIM\_up  
UTP15 COSTIM\_up  
NSA2 COSTIM\_up  
LINC01600 COSTIM\_up  
SEPTIN8 COSTIM\_up  
UQCRQ COSTIM\_up  
CGAS COSTIM\_up  
SFXN1 COSTIM\_up  
PDSS2 COSTIM\_up  
RPS14 COSTIM\_up  
PTTG1 COSTIM\_up  
RELL2 COSTIM\_up  
MIOS COSTIM\_up  
FABP5 COSTIM\_up  
BRI3 COSTIM\_up  
RAD21 COSTIM\_up  
TNFRSF11B COSTIM\_up  
ORC5 COSTIM\_up

|          |           |
|----------|-----------|
| DNAAF5   | COSTIM_up |
| OSGIN2   | COSTIM_up |
| GPR146   | COSTIM_up |
| GPER1    | COSTIM_up |
| INTS1    | COSTIM_up |
| SLC4A2   | COSTIM_up |
| FASTK    | COSTIM_up |
| TMUB1    | COSTIM_up |
| PHAX     | COSTIM_up |
| FOXK1    | COSTIM_up |
| COX6C    | COSTIM_up |
| YWHAZ    | COSTIM_up |
| BAALC    | COSTIM_up |
| FZD6     | COSTIM_up |
| CTHRC1   | COSTIM_up |
| SLC25A32 | COSTIM_up |
| DCAF13   | COSTIM_up |
| VIRMA    | COSTIM_up |
| GEM      | COSTIM_up |
| WASHC5   | COSTIM_up |
| RPP25L   | COSTIM_up |
| FAM219A  | COSTIM_up |
| NUDT2    | COSTIM_up |
| UBAP1    | COSTIM_up |
| METTL2B  | COSTIM_up |
| FXN      | COSTIM_up |
| ZMAT4    | COSTIM_up |
| KDM1B    | COSTIM_up |
| C9orf64  | COSTIM_up |
| HNRNPK   | COSTIM_up |
| ZHX1     | COSTIM_up |
| DYNLT3   | COSTIM_up |
| MID1IP1  | COSTIM_up |
| PIGA     | COSTIM_up |
| WNK2     | COSTIM_up |
| NLGN4Y   | COSTIM_up |
| HDX      | COSTIM_up |
| NDUFB6   | COSTIM_up |
| NOL6     | COSTIM_up |
| VCP      | COSTIM_up |
| STOML2   | COSTIM_up |
| WRN      | COSTIM_up |
| CFL2     | COSTIM_up |
| SUGT1    | COSTIM_up |
| GTF2A1   | COSTIM_up |
| SLC16A9  | COSTIM_up |
| REEP3    | COSTIM_up |
| PKN0X2   | COSTIM_up |
| LRR1     | COSTIM_up |
| RPL36AL  | COSTIM_up |

|          |           |
|----------|-----------|
| DNAAF2   | COSTIM_up |
| ZNF22    | COSTIM_up |
| EML5     | COSTIM_up |
| RPUSD4   | COSTIM_up |
| AKR1E2   | COSTIM_up |
| NUDT5    | COSTIM_up |
| ATP5F1C  | COSTIM_up |
| VDAC2    | COSTIM_up |
| COMTD1   | COSTIM_up |
| PDZD8    | COSTIM_up |
| ABRAXAS2 | COSTIM_up |
| FAM204A  | COSTIM_up |
| PRDX3    | COSTIM_up |
| ENOX2    | COSTIM_up |
| GHITM    | COSTIM_up |
| SNAPC4   | COSTIM_up |
| PMPCA    | COSTIM_up |
| ENTR1    | COSTIM_up |
| HPRT1    | COSTIM_up |
| DIPK1B   | COSTIM_up |
| ZMYND19  | COSTIM_up |
| DDX21    | COSTIM_up |
| BMS1     | COSTIM_up |
| FUNDC2   | COSTIM_up |
| NSMF     | COSTIM_up |
| TRUB1    | COSTIM_up |
| E2F7     | COSTIM_up |
| PACSIN3  | COSTIM_up |
| SLC39A13 | COSTIM_up |
| PSMC3    | COSTIM_up |
| RAPSN    | COSTIM_up |
| TC2N     | COSTIM_up |
| CPSF2    | COSTIM_up |
| SMC02    | COSTIM_up |
| IFI27L1  | COSTIM_up |
| ARL5B    | COSTIM_up |
| TAF1D    | COSTIM_up |
| ABTB2    | COSTIM_up |
| SPRED1   | COSTIM_up |
| GPT2     | COSTIM_up |
| RAB8B    | COSTIM_up |
| RPUSD2   | COSTIM_up |
| HIF1AN   | COSTIM_up |
| NDUFB8   | COSTIM_up |
| BRD7     | COSTIM_up |
| TRMT61A  | COSTIM_up |
| BAG5     | COSTIM_up |
| API5     | COSTIM_up |
| HPS6     | COSTIM_up |
| NOLC1    | COSTIM_up |



|          |           |
|----------|-----------|
| ALKBH3   | COSTIM_up |
| COPS2    | COSTIM_up |
| CCT2     | COSTIM_up |
| PCBD1    | COSTIM_up |
| ZNF202   | COSTIM_up |
| STXBP4   | COSTIM_up |
| CUL5     | COSTIM_up |
| MYRFL    | COSTIM_up |
| TRIM44   | COSTIM_up |
| TAF10    | COSTIM_up |
| NET01    | COSTIM_up |
| CYB5A    | COSTIM_up |
| USP54    | COSTIM_up |
| CYB5R2   | COSTIM_up |
| SERPINB8 | COSTIM_up |
| IDH3A    | COSTIM_up |
| RPL27A   | COSTIM_up |
| DENND2B  | COSTIM_up |
| ATMIN    | COSTIM_up |
| LE01     | COSTIM_up |
| TMX3     | COSTIM_up |
| WEE1     | COSTIM_up |
| HDGFL3   | COSTIM_up |
| MCM7     | COSTIM_up |
| TMED3    | COSTIM_up |
| SEC11C   | COSTIM_up |
| TMEM135  | COSTIM_up |
| CENPV    | COSTIM_up |
| CIA02B   | COSTIM_up |
| HSP90B1  | COSTIM_up |
| TVP23A   | COSTIM_up |
| PLEKHA7  | COSTIM_up |
| B2M      | COSTIM_up |
| SAAL1    | COSTIM_up |
| PPIB     | COSTIM_up |
| SCNN1G   | COSTIM_up |
| DCTN5    | COSTIM_up |
| CLPX     | COSTIM_up |
| ZBTB39   | COSTIM_up |
| STAT6    | COSTIM_up |
| PATL1    | COSTIM_up |
| STX3     | COSTIM_up |
| MRPL16   | COSTIM_up |
| YWHAB    | COSTIM_up |
| MAP1A    | COSTIM_up |
| RCCD1    | COSTIM_up |
| MARS1    | COSTIM_up |
| MBD6     | COSTIM_up |
| PDIA3    | COSTIM_up |
| NUDT21   | COSTIM_up |

|          |           |
|----------|-----------|
| PBX3     | COSTIM_up |
| PHB      | COSTIM_up |
| SNRPD1   | COSTIM_up |
| SAMD14   | COSTIM_up |
| GOLGA2   | COSTIM_up |
| TRUB2    | COSTIM_up |
| COQ4     | COSTIM_up |
| SLC27A4  | COSTIM_up |
| URM1     | COSTIM_up |
| DOLPP1   | COSTIM_up |
| ENDOG    | COSTIM_up |
| C15orf39 | COSTIM_up |
| COQ7     | COSTIM_up |
| CRK      | COSTIM_up |
| FBX022   | COSTIM_up |
| TBC1D2B  | COSTIM_up |
| RNF214   | COSTIM_up |
| CDK12    | COSTIM_up |
| ATP5MG   | COSTIM_up |
| RRM1     | COSTIM_up |
| PRRT2    | COSTIM_up |
| IRGQ     | COSTIM_up |
| ZNF668   | COSTIM_up |
| VKORC1   | COSTIM_up |
| SMG8     | COSTIM_up |
| RAB8A    | COSTIM_up |
| GPX4     | COSTIM_up |
| KLHL26   | COSTIM_up |
| GATAD2A  | COSTIM_up |
| MVD      | COSTIM_up |
| TRAPPC2L | COSTIM_up |
| RSKR     | COSTIM_up |
| RPL13    | COSTIM_up |
| KMT2D    | COSTIM_up |
| COR06    | COSTIM_up |
| RHEBL1   | COSTIM_up |
| TUBA1A   | COSTIM_up |
| TUBA1C   | COSTIM_up |
| NFKBID   | COSTIM_up |
| ZNF526   | COSTIM_up |
| ZNF146   | COSTIM_up |
| SPINT2   | COSTIM_up |
| YIF1B    | COSTIM_up |
| DAPK3    | COSTIM_up |
| EEF2     | COSTIM_up |
| CHAF1A   | COSTIM_up |
| UBXN6    | COSTIM_up |
| HDGFL2   | COSTIM_up |
| ZNF444   | COSTIM_up |
| GL0D4    | COSTIM_up |

|           |           |
|-----------|-----------|
| MFSD3     | COSTIM_up |
| GPT       | COSTIM_up |
| SRR       | COSTIM_up |
| TSR1      | COSTIM_up |
| TRPV3     | COSTIM_up |
| C19orf48  | COSTIM_up |
| OTUB1     | COSTIM_up |
| CD320     | COSTIM_up |
| SPRYD3    | COSTIM_up |
| NDUFV1    | COSTIM_up |
| CDK2AP2   | COSTIM_up |
| PRDX2     | COSTIM_up |
| ZNF232    | COSTIM_up |
| MIS12     | COSTIM_up |
| MRPL58    | COSTIM_up |
| ATP5PD    | COSTIM_up |
| TMEM88    | COSTIM_up |
| SRP68     | COSTIM_up |
| FAM234A   | COSTIM_up |
| ZNF598    | COSTIM_up |
| RAB26     | COSTIM_up |
| MLST8     | COSTIM_up |
| E4F1      | COSTIM_up |
| ECI1      | COSTIM_up |
| CASKIN1   | COSTIM_up |
| KCTD5     | COSTIM_up |
| DDB1      | COSTIM_up |
| VPS37C    | COSTIM_up |
| BEST1     | COSTIM_up |
| FTH1      | COSTIM_up |
| POLR2G    | COSTIM_up |
| SLC3A2    | COSTIM_up |
| RPSA      | COSTIM_up |
| FADD      | COSTIM_up |
| SAC3D1    | COSTIM_up |
| SF1       | COSTIM_up |
| CCDC88B   | COSTIM_up |
| COPS6     | COSTIM_up |
| NUDT16L1  | COSTIM_up |
| RNF187    | COSTIM_up |
| H00K3     | COSTIM_up |
| MAPK1IP1L | COSTIM_up |
| DDIT4     | COSTIM_up |
| RBPJ      | COSTIM_up |
| ZCCHC4    | COSTIM_up |
| UBTD2     | COSTIM_up |
| NKIRAS2   | COSTIM_up |
| DNAJC7    | COSTIM_up |
| KCNV2     | COSTIM_up |
| IRF2BP2   | COSTIM_up |

|          |           |
|----------|-----------|
| NT5DC2   | COSTIM_up |
| SMIM4    | COSTIM_up |
| COA6     | COSTIM_up |
| MGAT2    | COSTIM_up |
| MMADHC   | COSTIM_up |
| PDHB     | COSTIM_up |
| MPLKIP   | COSTIM_up |
| IRF2     | COSTIM_up |
| ARF4     | COSTIM_up |
| SEPTIN2  | COSTIM_up |
| FILIP1L  | COSTIM_up |
| MFSD2A   | COSTIM_up |
| DTYMK    | COSTIM_up |
| TAP1     | COSTIM_up |
| ING5     | COSTIM_up |
| STIP1    | COSTIM_up |
| SCNN1B   | COSTIM_up |
| ATXN2L   | COSTIM_up |
| POLR3D   | COSTIM_up |
| FEN1     | COSTIM_up |
| SLC20A2  | COSTIM_up |
| STAT3    | COSTIM_up |
| ZSWIM1   | COSTIM_up |
| NDUFS5   | COSTIM_up |
| TMEM208  | COSTIM_up |
| AHCYL1   | COSTIM_up |
| DNAJC21  | COSTIM_up |
| SEMA4C   | COSTIM_up |
| PPIP5K1  | COSTIM_up |
| ZBTB5    | COSTIM_up |
| CHTF8    | COSTIM_up |
| LCMT2    | COSTIM_up |
| ZNF507   | COSTIM_up |
| STX18    | COSTIM_up |
| GFM1     | COSTIM_up |
| DDX19A   | COSTIM_up |
| USP39    | COSTIM_up |
| TNIP2    | COSTIM_up |
| TMEM150A | COSTIM_up |
| RNF181   | COSTIM_up |
| MAT2A    | COSTIM_up |
| LETM1    | COSTIM_up |
| MFF      | COSTIM_up |
| PXDC1    | COSTIM_up |
| E2F6     | COSTIM_up |
| FEM1B    | COSTIM_up |
| COMMD8   | COSTIM_up |
| ATP5ME   | COSTIM_up |
| UQCRFS1  | COSTIM_up |
| SLC49A3  | COSTIM_up |

|          |           |
|----------|-----------|
| MAP2K1   | COSTIM_up |
| HNRNPH1  | COSTIM_up |
| ASMTL    | COSTIM_up |
| SLC25A6  | COSTIM_up |
| CSNK1G1  | COSTIM_up |
| ZNF354A  | COSTIM_up |
| ATF5     | COSTIM_up |
| UBE2V2   | COSTIM_up |
| ZBTB43   | COSTIM_up |
| XP06     | COSTIM_up |
| APEX2    | COSTIM_up |
| NSMCE1   | COSTIM_up |
| NPIP12   | COSTIM_up |
| CD2BP2   | COSTIM_up |
| TBC1D10B | COSTIM_up |
| LMAN2    | COSTIM_up |
| PRELID1  | COSTIM_up |
| SLC50A1  | COSTIM_up |
| CXCL10   | COSTIM_up |
| NPIP3    | COSTIM_up |
| NMD3     | COSTIM_up |
| GPRIN1   | COSTIM_up |
| MRPL1    | COSTIM_up |
| PGM2     | COSTIM_up |
| MINAR1   | COSTIM_up |
| SNUPN    | COSTIM_up |
| SIN3A    | COSTIM_up |
| ARL13B   | COSTIM_up |
| NPR1     | COSTIM_up |
| CXCL8    | COSTIM_up |
| PCBP1    | COSTIM_up |
| HINT1    | COSTIM_up |
| NFU1     | COSTIM_up |
| RAMAC    | COSTIM_up |
| APLF     | COSTIM_up |
| BOLA2B   | COSTIM_up |
| RGPD8    | COSTIM_up |
| HIC2     | COSTIM_up |
| BUB1     | COSTIM_up |
| SPNS1    | COSTIM_up |
| CHRNA5   | COSTIM_up |
| CENPX    | COSTIM_up |
| ASPSCR1  | COSTIM_up |
| FASN     | COSTIM_up |
| CNBP     | COSTIM_up |
| DUS1L    | COSTIM_up |
| GPS1     | COSTIM_up |
| DCXR     | COSTIM_up |
| ZNF32    | COSTIM_up |
| NRG4     | COSTIM_up |

|            |           |
|------------|-----------|
| LIMS1      | COSTIM_up |
| TMEM266    | COSTIM_up |
| UGP2       | COSTIM_up |
| HNRNPF     | COSTIM_up |
| CSGALNACT2 | COSTIM_up |
| AVEN       | COSTIM_up |
| SYAP1      | COSTIM_up |
| TOR1AIP2   | COSTIM_up |
| GUSB       | COSTIM_up |
| ZNF764     | COSTIM_up |
| ZNF768     | COSTIM_up |
| PUSL1      | COSTIM_up |
| SF3B5      | COSTIM_up |
| ZNF35      | COSTIM_up |
| CHD3       | COSTIM_up |
| ALCAM      | COSTIM_up |
| YWHAG      | COSTIM_up |
| UBE2E3     | COSTIM_up |
| CNTR0B     | COSTIM_up |
| TRAPPC1    | COSTIM_up |
| TMEM192    | COSTIM_up |
| UBE2E1     | COSTIM_up |
| HNRNPA3    | COSTIM_up |
| USP38      | COSTIM_up |
| NANP       | COSTIM_up |
| USP47      | COSTIM_up |
| MRAP       | COSTIM_up |
| GON7       | COSTIM_up |
| FAXDC2     | COSTIM_up |
| ELP5       | COSTIM_up |
| UBB        | COSTIM_up |
| NFRKB      | COSTIM_up |
| TMED10     | COSTIM_up |
| SETMAR     | COSTIM_up |
| GPRC5C     | COSTIM_up |
| HARS1      | COSTIM_up |
| RIOX1      | COSTIM_up |
| NUDT9      | COSTIM_up |
| PA2G4      | COSTIM_up |
| ELOVL6     | COSTIM_up |
| TMC7       | COSTIM_up |
| ARL6IP1    | COSTIM_up |
| SERPINB9   | COSTIM_up |
| NUDCD2     | COSTIM_up |
| HSPA4      | COSTIM_up |
| COMMD5     | COSTIM_up |
| ZNF16      | COSTIM_up |
| ARMC10     | COSTIM_up |
| RNF34      | COSTIM_up |
| ATF7       | COSTIM_up |

SOCS6 COSTIM\_up  
ZNF296 COSTIM\_up  
HOXB9 COSTIM\_up  
KIF5B COSTIM\_up  
CDCA4 COSTIM\_up  
USP32 COSTIM\_up  
RIOX2 COSTIM\_up  
TRIAP1 COSTIM\_up  
LSM3 COSTIM\_up  
KIAA0232 COSTIM\_up  
TMEM43 COSTIM\_up  
RPS9 COSTIM\_up  
TSEN34 COSTIM\_up  
MSANTD4 COSTIM\_up  
NDUFA3 COSTIM\_up  
DNAJC24 COSTIM\_up  
TRMT61B COSTIM\_up  
JAGN1 COSTIM\_up  
ZNF672 COSTIM\_up  
ZNF692 COSTIM\_up  
GRIK1 COSTIM\_up  
TMEM126A COSTIM\_up  
NETO2 COSTIM\_up  
SCAND1 COSTIM\_up  
JUNB COSTIM\_up  
NPTX1 COSTIM\_up  
FAM98B COSTIM\_up  
CANT1 COSTIM\_up  
ZDHHC16 COSTIM\_up  
EXOSC1 COSTIM\_up  
PGAM1 COSTIM\_up  
CLCN5 COSTIM\_up  
MRPL36 COSTIM\_up  
ZNF581 COSTIM\_up  
POLR1C COSTIM\_up  
ASXL1 COSTIM\_up  
DLK2 COSTIM\_up  
ZNF562 COSTIM\_up  
ZNF318 COSTIM\_up  
HOPX COSTIM\_up  
RSL1D1 COSTIM\_up  
PPID COSTIM\_up  
ETFDH COSTIM\_up  
PTGER4 COSTIM\_up  
TBCA COSTIM\_up  
MAP6 COSTIM\_up  
BCL2L1 COSTIM\_up  
PLRG1 COSTIM\_up  
PIK3CD COSTIM\_up  
SLC25A33 COSTIM\_up

|         |           |
|---------|-----------|
| RGS19   | COSTIM_up |
| HDAC3   | COSTIM_up |
| GPHN    | COSTIM_up |
| CAMTA1  | COSTIM_up |
| SLFNL1  | COSTIM_up |
| BCL2    | COSTIM_up |
| CTPS1   | COSTIM_up |
| COL8A2  | COSTIM_up |
| EXOSC10 | COSTIM_up |
| RPS21   | COSTIM_up |
| MRM3    | COSTIM_up |
| RPS7    | COSTIM_up |
| RNASEH1 | COSTIM_up |
| PRNP    | COSTIM_up |
| PPIH    | COSTIM_up |
| ZNF57   | COSTIM_up |
| SYNP0   | COSTIM_up |
| THOP1   | COSTIM_up |
| USP19   | COSTIM_up |
| SERF1A  | COSTIM_up |
| SMN1    | COSTIM_up |
| NME6    | COSTIM_up |
| CYCS    | COSTIM_up |
| FRMD3   | COSTIM_up |
| MRPL13  | COSTIM_up |
| CEBPB   | COSTIM_up |
| PAIP1   | COSTIM_up |
| MACROD2 | COSTIM_up |
| BSG     | COSTIM_up |
| COPRS   | COSTIM_up |
| POP7    | COSTIM_up |
| ALG14   | COSTIM_up |
| SUCLG2  | COSTIM_up |
| GNB2    | COSTIM_up |
| MCRIP2  | COSTIM_up |
| CLP1    | COSTIM_up |
| COPS9   | COSTIM_up |
| ZNF24   | COSTIM_up |
| MANEA   | COSTIM_up |
| FIBP    | COSTIM_up |
| PPP1CA  | COSTIM_up |
| HCFC1   | COSTIM_up |
| RASGRP1 | COSTIM_up |
| CHCHD1  | COSTIM_up |
| MRPL52  | COSTIM_up |
| EFEMP2  | COSTIM_up |
| ZMAT3   | COSTIM_up |
| MUS81   | COSTIM_up |
| CFL1    | COSTIM_up |
| CBWD1   | COSTIM_up |



|          |           |
|----------|-----------|
| RPL38    | COSTIM_up |
| METAP1D  | COSTIM_up |
| DHCR7    | COSTIM_up |
| RNASEH2C | COSTIM_up |
| MYE0V    | COSTIM_up |
| MYD88    | COSTIM_up |
| OXSRI    | COSTIM_up |
| KAT5     | COSTIM_up |
| RELA     | COSTIM_up |
| FAM222B  | COSTIM_up |
| TRMT112  | COSTIM_up |
| MRPL57   | COSTIM_up |
| NOC3L    | COSTIM_up |
| ESRRA    | COSTIM_up |
| COMMD1   | COSTIM_up |
| MTX1     | COSTIM_up |
| PARP14   | COSTIM_up |
| CKS1B    | COSTIM_up |
| IQCB1    | COSTIM_up |
| GPR137   | COSTIM_up |
| MZT2A    | COSTIM_up |
| ZBTB21   | COSTIM_up |
| FAM86B3P | COSTIM_up |
| MAP3K11  | COSTIM_up |
| DAG1     | COSTIM_up |
| NAA20    | COSTIM_up |
| MICOS10  | COSTIM_up |
| RNF26    | COSTIM_up |
| PPP1R14B | COSTIM_up |
| ZNRD2    | COSTIM_up |
| SMARCC1  | COSTIM_up |
| FKBP2    | COSTIM_up |
| GMPPB    | COSTIM_up |
| ZNF622   | COSTIM_up |
| NABP1    | COSTIM_up |
| CEP83    | COSTIM_up |
| NUDT4    | COSTIM_up |
| SLC19A1  | COSTIM_up |
| UQCRH    | COSTIM_up |
| TAS1R1   | COSTIM_up |
| EIF1AX   | COSTIM_up |
| PSMD1    | COSTIM_up |
| HEG1     | COSTIM_up |
| TOMM20   | COSTIM_up |
| AGFG1    | COSTIM_up |
| CNP      | COSTIM_up |
| EIF1     | COSTIM_up |
| PLK3     | COSTIM_up |
| GOLIM4   | COSTIM_up |
| ATP5MD   | COSTIM_up |

|          |           |
|----------|-----------|
| RBM4     | COSTIM_up |
| XXYLT1   | COSTIM_up |
| NRR0S    | COSTIM_up |
| FBX045   | COSTIM_up |
| GNG5     | COSTIM_up |
| FAM3C2   | COSTIM_up |
| C16orf91 | COSTIM_up |
| RGMB     | COSTIM_up |
| TRMT10C  | COSTIM_up |
| CTU2     | COSTIM_up |
| MGA      | COSTIM_up |
| C12orf66 | COSTIM_up |
| PRPF8    | COSTIM_up |
| PITPNA   | COSTIM_up |
| DDX23    | COSTIM_up |
| ZNHIT2   | COSTIM_up |
| LIG4     | COSTIM_up |
| ATP2A2   | COSTIM_up |
| RPL4     | COSTIM_up |
| SNAPC5   | COSTIM_up |
| DENND4A  | COSTIM_up |
| MRPL11   | COSTIM_up |
| AKIRIN1  | COSTIM_up |
| SLC29A2  | COSTIM_up |
| TMEM167A | COSTIM_up |
| LARP7    | COSTIM_up |
| BRMS1    | COSTIM_up |
| RPL15    | COSTIM_up |
| FAM241A  | COSTIM_up |
| SRP72    | COSTIM_up |
| PDE12    | COSTIM_up |
| YIF1A    | COSTIM_up |
| NDUFA11  | COSTIM_up |
| RSRC1    | COSTIM_up |
| RAB1B    | COSTIM_up |
| PTDSS2   | COSTIM_up |
| MICOS13  | COSTIM_up |
| KCTD13   | COSTIM_up |
| DHX36    | COSTIM_up |
| FBXW8    | COSTIM_up |
| KLC2     | COSTIM_up |
| SLC22A1  | COSTIM_up |
| ATR      | COSTIM_up |
| SNHG29   | COSTIM_up |
| MRPS22   | COSTIM_up |
| MARCKSL1 | COSTIM_up |
| PSMD2    | COSTIM_up |
| CSRP2    | COSTIM_up |
| PARL     | COSTIM_up |
| DCTN2    | COSTIM_up |

|          |           |
|----------|-----------|
| ZNF408   | COSTIM_up |
| CKAP5    | COSTIM_up |
| ARHGAP1  | COSTIM_up |
| MED16    | COSTIM_up |
| CENPS    | COSTIM_up |
| LSM1     | COSTIM_up |
| BANF1    | COSTIM_up |
| PTPN2    | COSTIM_up |
| EIF1AD   | COSTIM_up |
| EIF3F    | COSTIM_up |
| CLTB     | COSTIM_up |
| LPL      | COSTIM_up |
| RFESD    | COSTIM_up |
| SART1    | COSTIM_up |
| DRAP1    | COSTIM_up |
| MRPL48   | COSTIM_up |
| FOSL1    | COSTIM_up |
| ERCC4    | COSTIM_up |
| CCDC85B  | COSTIM_up |
| TMEM70   | COSTIM_up |
| ZNF77    | COSTIM_up |
| GPR156   | COSTIM_up |
| MTLN     | COSTIM_up |
| B3GNTL1  | COSTIM_up |
| AURKAIP1 | COSTIM_up |
| TLL11    | COSTIM_up |
| TOMM5    | COSTIM_up |
| RUVBL1   | COSTIM_up |
| CTDNEP1  | COSTIM_up |
| SWI5     | COSTIM_up |
| UBE20    | COSTIM_up |
| TUBB6    | COSTIM_up |
| B3GALT6  | COSTIM_up |
| TPRN     | COSTIM_up |
| SLC35A4  | COSTIM_up |
| SSNA1    | COSTIM_up |
| CSTF3    | COSTIM_up |
| CHMP6    | COSTIM_up |
| UFSP1    | COSTIM_up |
| TMEM39A  | COSTIM_up |
| CCDC57   | COSTIM_up |
| SPHK1    | COSTIM_up |
| ENTHD1   | COSTIM_up |
| SMIM19   | COSTIM_up |
| ANAPC2   | COSTIM_up |
| ZBTB80S  | COSTIM_up |
| COX8A    | COSTIM_up |
| ZSCAN2   | COSTIM_up |
| CDC26    | COSTIM_up |
| KCMF1    | COSTIM_up |

|          |           |
|----------|-----------|
| SPRYD4   | COSTIM_up |
| CLK2     | COSTIM_up |
| LMNB2    | COSTIM_up |
| MEX3C    | COSTIM_up |
| MYO1D    | COSTIM_up |
| RBIS     | COSTIM_up |
| RUFY1    | COSTIM_up |
| BASP1    | COSTIM_up |
| WSB2     | COSTIM_up |
| TYMS     | COSTIM_up |
| PNMA1    | COSTIM_up |
| ANKLE2   | COSTIM_up |
| THAP4    | COSTIM_up |
| DPP7     | COSTIM_up |
| SEC24C   | COSTIM_up |
| SMCR8    | COSTIM_up |
| MTX3     | COSTIM_up |
| FBX046   | COSTIM_up |
| WDR73    | COSTIM_up |
| RHOG     | COSTIM_up |
| NUDT4B   | COSTIM_up |
| FAM210A  | COSTIM_up |
| TALD01   | COSTIM_up |
| NAP1L4P1 | COSTIM_up |
| RPS6KA3  | COSTIM_up |
| PUS1     | COSTIM_up |
| GATD1    | COSTIM_up |
| CCDC71   | COSTIM_up |
| TIMM22   | COSTIM_up |
| ZFAS1    | COSTIM_up |
| PAWR     | COSTIM_up |
| ARIH2    | COSTIM_up |
| SLC25A22 | COSTIM_up |
| ATOX1    | COSTIM_up |
| RPLP2    | COSTIM_up |
| CSTF2T   | COSTIM_up |
| ACAD9    | COSTIM_up |
| POLR2L   | COSTIM_up |
| FLII     | COSTIM_up |
| HNRNPA0  | COSTIM_up |
| CHID1    | COSTIM_up |
| GRB2     | COSTIM_up |
| UBE2N    | COSTIM_up |
| MAMDC4   | COSTIM_up |
| RIC8A    | COSTIM_up |
| IMP3     | COSTIM_up |
| ASB8     | COSTIM_up |
| IMPDH2   | COSTIM_up |
| NDUFAF3  | COSTIM_up |
| C2orf69  | COSTIM_up |

STAP2 COSTIM\_up  
DDX10 COSTIM\_up  
ZNF366 COSTIM\_up  
PLEC COSTIM\_up  
GALNT11 COSTIM\_up  
WDR6 COSTIM\_up  
GEN1 COSTIM\_up  
TMPRSS9 COSTIM\_up  
TMEM11 COSTIM\_up  
ZFAND2A COSTIM\_up  
BEND3 COSTIM\_up  
NT5DC1 COSTIM\_up  
RPS3AP5 COSTIM\_up  
TIMM23B-AGAP6 COSTIM\_up  
KLHL11 COSTIM\_up  
EPM2AIP1 COSTIM\_up  
GTPBP6 COSTIM\_up  
SUZ12 COSTIM\_up  
RPP25 COSTIM\_up  
GRINA COSTIM\_up  
COX5A COSTIM\_up  
CPNE7 COSTIM\_up  
MPI COSTIM\_up  
EXOSC4 COSTIM\_up  
PFAS COSTIM\_up  
ZBTB7A COSTIM\_up  
TUFM COSTIM\_up  
EIF3K COSTIM\_up  
MRFAP1L1 COSTIM\_up  
MRFAP1 COSTIM\_up  
C3orf38 COSTIM\_up  
RRS1 COSTIM\_up  
RCC2 COSTIM\_up  
CYC1 COSTIM\_up  
FARSA COSTIM\_up  
SPTY2D1 COSTIM\_up  
SAMD4B COSTIM\_up  
EDC3 COSTIM\_up  
RPS2P28 COSTIM\_up  
CALR COSTIM\_up  
RAD23A COSTIM\_up  
GADD45GIP1 COSTIM\_up  
PTPN11 COSTIM\_up  
FAM156B COSTIM\_up  
HLA-DQB1 COSTIM\_up  
PACS2 COSTIM\_up  
GEMIN4 COSTIM\_up  
IL6-AS1 COSTIM\_up  
FJX1 COSTIM\_up  
OR9A2 COSTIM\_up

SHARPIN COSTIM\_up  
GCC1 COSTIM\_up  
LSMEM2 COSTIM\_up  
ZFPM1 COSTIM\_up  
PLD6 COSTIM\_up  
LACC1 COSTIM\_up  
MAF1 COSTIM\_up  
SERTAD2 COSTIM\_up  
C14orf119 COSTIM\_up  
FIZ1 COSTIM\_up  
PUF60 COSTIM\_up  
DCTPP1 COSTIM\_up  
ZNF771 COSTIM\_up  
SOCS4 COSTIM\_up  
TMEM86B COSTIM\_up  
TRNAU1AP COSTIM\_up  
EXOC3 COSTIM\_up  
FAHD1 COSTIM\_up  
RCC1 COSTIM\_up  
PRKRA COSTIM\_up  
CCDC43 COSTIM\_up  
HCLS1 COSTIM\_up  
PAK2 COSTIM\_up  
MCFD2 COSTIM\_up  
TSPYL5 COSTIM\_up  
MB21D2 COSTIM\_up  
SSTR2 COSTIM\_up  
PCGF5 COSTIM\_up  
YOD1 COSTIM\_up  
LINC02363 COSTIM\_up  
SMG1P3 COSTIM\_up  
GPR157 COSTIM\_up  
SLC36A4 COSTIM\_up  
PPA1 COSTIM\_up  
PSMG4 COSTIM\_up  
SSR4 COSTIM\_up  
SCRIB COSTIM\_up  
KCTD2 COSTIM\_up  
FAM83H COSTIM\_up  
ST20 COSTIM\_up  
PITPNB COSTIM\_up  
MRPL14 COSTIM\_up  
NQ01 COSTIM\_up  
AEN COSTIM\_up  
TRAPPC5 COSTIM\_up  
HIGD1A COSTIM\_up  
NPM1 COSTIM\_up  
POLR2A COSTIM\_up  
LRRRC75A COSTIM\_up  
HSP90AA6P COSTIM\_up

|          |           |
|----------|-----------|
| OGF0D3   | COSTIM_up |
| WASHC1   | COSTIM_up |
| ZBTB2    | COSTIM_up |
| C6orf223 | COSTIM_up |
| MRPS23   | COSTIM_up |
| C5orf30  | COSTIM_up |
| SIAH2    | COSTIM_up |
| COPG1    | COSTIM_up |
| SLC35C1  | COSTIM_up |
| TIGIT    | COSTIM_up |
| C5orf24  | COSTIM_up |
| ADO      | COSTIM_up |
| COA4     | COSTIM_up |
| PRKAG1   | COSTIM_up |
| MRPS11   | COSTIM_up |
| SNRPE    | COSTIM_up |
| OGFRP1   | COSTIM_up |
| TMEM259  | COSTIM_up |
| TNRC18   | COSTIM_up |
| NOP10    | COSTIM_up |
| MRPL41   | COSTIM_up |
| MRPS16   | COSTIM_up |
| ARL6IP4  | COSTIM_up |
| SHMT2    | COSTIM_up |
| ATP6AP2  | COSTIM_up |
| CYB5D1   | COSTIM_up |
| BACE2    | COSTIM_up |
| UBE2E2   | COSTIM_up |
| AP1S2    | COSTIM_up |
| C8orf33  | COSTIM_up |
| FBXL6    | COSTIM_up |
| YBEY     | COSTIM_up |
| NPL0C4   | COSTIM_up |
| EXOC7    | COSTIM_up |
| KPNA2    | COSTIM_up |
| WASH6P   | COSTIM_up |
| GLRX5    | COSTIM_up |
| FAM104B  | COSTIM_up |
| MFS5     | COSTIM_up |
| ADI1     | COSTIM_up |
| RWDD4    | COSTIM_up |
| SKA2     | COSTIM_up |
| ANXA2    | COSTIM_up |
| PAQR7    | COSTIM_up |
| NGRN     | COSTIM_up |
| RPS17    | COSTIM_up |
| OR2T29   | COSTIM_up |
| CRIP2    | COSTIM_up |
| DDX28    | COSTIM_up |
| ACBD3    | COSTIM_up |

RRP7BP COSTIM\_up  
RBM10 COSTIM\_up  
RPL35A COSTIM\_up  
CEP63 COSTIM\_up  
SRPRA COSTIM\_up  
EWSR1 COSTIM\_up  
HMGN4 COSTIM\_up  
MTA1 COSTIM\_up  
PYCR1 COSTIM\_up  
NAA38 COSTIM\_up  
SPNS2 COSTIM\_up  
AP2A2 COSTIM\_up  
SLC25A10 COSTIM\_up  
GAS6 COSTIM\_up  
NEB COSTIM\_up  
PTGDR2 COSTIM\_up  
HSP90AB3P COSTIM\_up  
RUVBL2 COSTIM\_up  
DDX41 COSTIM\_up  
DAZAP2 COSTIM\_up  
OR2T34 COSTIM\_up  
BOLA2 COSTIM\_up  
SF3A3 COSTIM\_up  
TRIM61 COSTIM\_up  
GTF2H2C COSTIM\_up  
GPR132 COSTIM\_up  
EP400 COSTIM\_up  
UTP11 COSTIM\_up  
PSMG1 COSTIM\_up  
PRR14L COSTIM\_up  
SETD3 COSTIM\_up  
SFXN4 COSTIM\_up  
MRPL54 COSTIM\_up  
NDUFB1 COSTIM\_up  
ALYREF COSTIM\_up  
UPP1 COSTIM\_up  
TMEM50A COSTIM\_up  
TBK1 COSTIM\_up  
CBX6 COSTIM\_up  
MACC1 COSTIM\_up  
TBL3 COSTIM\_up  
TUBA8 COSTIM\_up  
TOB2 COSTIM\_up  
KMT5A COSTIM\_up  
NPW COSTIM\_up  
COA3 COSTIM\_up  
ST6GALNAC3 COSTIM\_up  
ACTG1 COSTIM\_up  
DENND5A COSTIM\_up  
OR2T10 COSTIM\_up



DIABLO COSTIM\_up  
VPS33B COSTIM\_up  
UQCR10 COSTIM\_up  
EIF3C COSTIM\_up  
NR2C2AP COSTIM\_up  
CRELD2 COSTIM\_up  
SCFD2 COSTIM\_up  
PGP COSTIM\_up  
IRAK1 COSTIM\_up  
CMSS1 COSTIM\_up  
TSSC4 COSTIM\_up  
RPL23AP82 COSTIM\_up  
SRPK3 COSTIM\_up  
CSF1 COSTIM\_up  
MAML2 COSTIM\_up  
SS18L1 COSTIM\_up  
KCND2 COSTIM\_up  
COPB2 COSTIM\_up  
THAP7 COSTIM\_up  
PTP4A3 COSTIM\_up  
TMEM255B COSTIM\_up  
HDDC3 COSTIM\_up  
ZFP1 COSTIM\_up  
SOCS3 COSTIM\_up  
XPOT COSTIM\_up  
SNN COSTIM\_up  
EIF4ENIF1 COSTIM\_up  
ATL3 COSTIM\_up  
NDUFA12 COSTIM\_up  
UBE2G2 COSTIM\_up  
AP00 COSTIM\_up  
PRR16 COSTIM\_up  
TMED9 COSTIM\_up  
SUM03 COSTIM\_up  
IMMP2L COSTIM\_up  
OR6C70 COSTIM\_up  
NOC4L COSTIM\_up  
NDUFA6 COSTIM\_up  
DGAT1 COSTIM\_up  
AP3M1 COSTIM\_up  
NELFA COSTIM\_up  
INTS5 COSTIM\_up  
RPS27L COSTIM\_up  
MANEAL COSTIM\_up  
AN09 COSTIM\_up  
FAF1 COSTIM\_up  
HSF1 COSTIM\_up  
C6orf120 COSTIM\_up  
DDX51 COSTIM\_up  
NOM02 COSTIM\_up

TNFAIP2 COSTIM\_up  
PRMT3 COSTIM\_up  
PRPF39 COSTIM\_up  
PPIL6 COSTIM\_up  
UBALD2 COSTIM\_up  
CCDC137 COSTIM\_up  
ATP6V0A2 COSTIM\_up  
TEDC1 COSTIM\_up  
HGS COSTIM\_up  
MAPK11 COSTIM\_up  
MRPL30 COSTIM\_up  
LINC00158 COSTIM\_up  
FAAP100 COSTIM\_up  
BRCC3 COSTIM\_up  
SP1 COSTIM\_up  
MRPL40 COSTIM\_up  
P4HB COSTIM\_up  
PSMD13 COSTIM\_up  
ZFP36L1 COSTIM\_up  
UBE2L3 COSTIM\_up  
MOSM0 COSTIM\_up  
DRG1 COSTIM\_up  
YTHDF3 COSTIM\_up  
ZNF696 COSTIM\_up  
KCNQ5 COSTIM\_up  
MORF4L1 COSTIM\_up  
SLC52A2 COSTIM\_up  
PCYT2 COSTIM\_up  
NAT8L COSTIM\_up  
BCAP31 COSTIM\_up  
GNB1L COSTIM\_up  
TRIM69 COSTIM\_up  
ATP6V0C COSTIM\_up  
LAMP1 COSTIM\_up  
ZNF267 COSTIM\_up  
LRCH3 COSTIM\_up  
NDUFA13 COSTIM\_up  
C15orf41 COSTIM\_up  
C2orf76 COSTIM\_up  
ZNRF1 COSTIM\_up  
ZNF749 COSTIM\_up  
KDM4D COSTIM\_up  
GPAT2 COSTIM\_up  
TOR3A COSTIM\_up  
PPP1CC COSTIM\_up  
CA5BP1 COSTIM\_up  
KRT10 COSTIM\_up  
NKRF COSTIM\_up  
KPNA4 COSTIM\_up  
RPS23 COSTIM\_up

INSIG1 COSTIM\_up  
NF2 COSTIM\_up  
MIR22HG COSTIM\_up  
HPDL COSTIM\_up  
KATNA1 COSTIM\_up  
ZFP91 COSTIM\_up  
C17orf58 COSTIM\_up  
HYAL3 COSTIM\_up  
LILRB4 COSTIM\_up  
TNFRSF4 COSTIM\_up  
TNFRSF18 COSTIM\_up  
RTN4RL2 COSTIM\_up  
EMID1 COSTIM\_up  
PTRH1 COSTIM\_up  
TMEM216 COSTIM\_up  
RPS19BP1 COSTIM\_up  
NAP1L1 COSTIM\_up  
CMC1 COSTIM\_up  
RNF220 COSTIM\_up  
MT1X COSTIM\_up  
FNBP1 COSTIM\_up  
CHP1 COSTIM\_up  
PTMA COSTIM\_up  
HSPA14 COSTIM\_up  
USP7 COSTIM\_up  
NANOS3 COSTIM\_up  
TET3 COSTIM\_up  
ZNF286A COSTIM\_up  
TMEM203 COSTIM\_up  
TCEA1 COSTIM\_up  
NHEJ1 COSTIM\_up  
FANCA COSTIM\_up  
MCRS1 COSTIM\_up  
CARD9 COSTIM\_up  
ZFP69B COSTIM\_up  
PLSCR3 COSTIM\_up  
EIF4EBP1 COSTIM\_up  
PMS2CL COSTIM\_up  
MORN2 COSTIM\_up  
UBQLN2 COSTIM\_up  
NWD1 COSTIM\_up  
C11orf95 COSTIM\_up  
MAPK12 COSTIM\_up  
AGRN COSTIM\_up  
TMPPE COSTIM\_up  
LINC00265 COSTIM\_up  
PRKAR1B COSTIM\_up  
NUTM2B COSTIM\_up  
NCR3LG1 COSTIM\_up  
TUBB4B COSTIM\_up

IL17REL COSTIM\_up  
HES4 COSTIM\_up  
CENPP COSTIM\_up  
GTF2F2 COSTIM\_up  
H2AX COSTIM\_up  
C19orf54 COSTIM\_up  
C22orf34 COSTIM\_up  
FAM83G COSTIM\_up  
SRSF10 COSTIM\_up  
OR2G6 COSTIM\_up  
NDOR1 COSTIM\_up  
NPIPP1 COSTIM\_up  
SUM02 COSTIM\_up  
RTL6 COSTIM\_up  
PARVB COSTIM\_up  
UROS COSTIM\_up  
ZDHC9 COSTIM\_up  
ZBED6CL COSTIM\_up  
SMIM15 COSTIM\_up  
TMEM120B COSTIM\_up  
RBM34 COSTIM\_up  
MTF1 COSTIM\_up  
TMEM201 COSTIM\_up  
ZDHC11 COSTIM\_up  
SLX4 COSTIM\_up  
RPL14 COSTIM\_up  
ASTL COSTIM\_up  
NOC2L COSTIM\_up  
NELFB COSTIM\_up  
ADAT2 COSTIM\_up  
NDUFA4 COSTIM\_up  
ALKBH2 COSTIM\_up  
LITAF COSTIM\_up  
TMEM120A COSTIM\_up  
ARID2 COSTIM\_up  
SF3B3 COSTIM\_up  
JPT1 COSTIM\_up  
PNRC2 COSTIM\_up  
RRP7A COSTIM\_up  
SLC25A51P4 COSTIM\_up  
S100A14 COSTIM\_up  
RPS2P46 COSTIM\_up  
SH2D5 COSTIM\_up  
PAX5 COSTIM\_up  
HLA-DRB1 COSTIM\_up  
ZNF79 COSTIM\_up  
STK40 COSTIM\_up  
EEF1A1P5 COSTIM\_up  
TUBB COSTIM\_up  
SUPT5H COSTIM\_up

XPNPEP3 COSTIM\_up  
OR2T2 COSTIM\_up  
PPIA COSTIM\_up  
SUPT3H COSTIM\_up  
NIF3L1 COSTIM\_up  
IARS1 COSTIM\_up  
POM121 COSTIM\_up  
WDR5 COSTIM\_up  
LONP1 COSTIM\_up  
FUT4 COSTIM\_up  
PTPN1 COSTIM\_up  
THEM5 COSTIM\_up  
XRCC6 COSTIM\_up  
TSC22D2 COSTIM\_up  
YRDC COSTIM\_up  
ZNF777 COSTIM\_up  
PIK3R4 COSTIM\_up  
IP04 COSTIM\_up  
NCOR2 COSTIM\_up  
PRPF40A COSTIM\_up  
ANAPC7 COSTIM\_up  
SLC6A9 COSTIM\_up  
NACA COSTIM\_up  
OR2T3 COSTIM\_up  
HDAC2 COSTIM\_up  
SDHAF3 COSTIM\_up  
RABL6 COSTIM\_up  
ZNF502 COSTIM\_up  
TRAPPC4 COSTIM\_up  
ZNF512B COSTIM\_up  
VKORC1L1 COSTIM\_up  
HLA-DQA1 COSTIM\_up  
COL27A1 COSTIM\_up  
SNHG17 COSTIM\_up  
ZNF239 COSTIM\_up  
ILRUN COSTIM\_up  
ADA COSTIM\_up  
ARID5A COSTIM\_up  
PPTC7 COSTIM\_up  
NHLRC2 COSTIM\_up  
CBWD3 COSTIM\_up  
ARHGEF12 COSTIM\_up  
FLNA COSTIM\_up  
NOP9 COSTIM\_up  
AP2A1 COSTIM\_up  
LAGE3 COSTIM\_up  
METTL9 COSTIM\_up  
CXorf40B COSTIM\_up  
ANXA6 COSTIM\_up  
GMFB COSTIM\_up

|          |           |
|----------|-----------|
| MAFG     | COSTIM_up |
| IGF2R    | COSTIM_up |
| DYNC1H1  | COSTIM_up |
| PCBP2    | COSTIM_up |
| ZGPAT    | COSTIM_up |
| SRC      | COSTIM_up |
| ZNF682   | COSTIM_up |
| PCNX3    | COSTIM_up |
| ACSL5    | COSTIM_up |
| LRRRC8B  | COSTIM_up |
| ABCB8    | COSTIM_up |
| SND1     | COSTIM_up |
| PSMD12   | COSTIM_up |
| NOL4L    | COSTIM_up |
| C1D      | COSTIM_up |
| TBC1D9B  | COSTIM_up |
| GTF2E2   | COSTIM_up |
| ZNF165   | COSTIM_up |
| ZNF720   | COSTIM_up |
| SVIL     | COSTIM_up |
| MRPL21   | COSTIM_up |
| HTT      | COSTIM_up |
| MAP3K5   | COSTIM_up |
| HNRNPAB  | COSTIM_up |
| PDGFA    | COSTIM_up |
| ZNF628   | COSTIM_up |
| RPF2     | COSTIM_up |
| ENTPD6   | COSTIM_up |
| FAR1     | COSTIM_up |
| CXorf40A | COSTIM_up |
| CDC42SE1 | COSTIM_up |
| SERPINB2 | COSTIM_up |
| DPP4     | COSTIM_up |
| NMB      | COSTIM_up |
| FAM114A1 | COSTIM_up |
| RPE      | COSTIM_up |
| ZNF460   | COSTIM_up |
| PTMAP2   | COSTIM_up |
| RPL37A   | COSTIM_up |
| MCMBP    | COSTIM_up |
| EME2     | COSTIM_up |
| TAF13    | COSTIM_up |
| ATAD3A   | COSTIM_up |
| FAM118B  | COSTIM_up |
| SLC9A8   | COSTIM_up |
| GPAA1    | COSTIM_up |
| SGTB     | COSTIM_up |
| FAM49A   | COSTIM_up |
| MYO1C    | COSTIM_up |
| KIF13B   | COSTIM_up |

|          |           |
|----------|-----------|
| ADH5     | COSTIM_up |
| SPG7     | COSTIM_up |
| HRNR     | COSTIM_up |
| HES5     | COSTIM_up |
| ER01A    | COSTIM_up |
| S100A6   | COSTIM_up |
| RPL12    | COSTIM_up |
| ZNF121   | COSTIM_up |
| MPZL1    | COSTIM_up |
| VPS13A   | COSTIM_up |
| GOLGA6L9 | COSTIM_up |
| C1orf122 | COSTIM_up |
| SNHG12   | COSTIM_up |
| NOL8     | COSTIM_up |
| MRPL42   | COSTIM_up |
| RPS4X    | COSTIM_up |
| MAK16    | COSTIM_up |
| AVPR1B   | COSTIM_up |
| SIRPA    | COSTIM_up |
| CD2AP    | COSTIM_up |
| ZNF544   | COSTIM_up |
| ZNF770   | COSTIM_up |
| MAN1A2   | COSTIM_up |
| DDRGK1   | COSTIM_up |
| TFDP1    | COSTIM_up |
| CACNA1E  | COSTIM_up |
| DDX42    | COSTIM_up |
| RPL23A   | COSTIM_up |
| UBL5     | COSTIM_up |
| ZNF485   | COSTIM_up |
| SDAD1    | COSTIM_up |
| PIM3     | COSTIM_up |
| GET3     | COSTIM_up |
| SPRED2   | COSTIM_up |
| BZW1P2   | COSTIM_up |
| TXNRD1   | COSTIM_up |
| YTHDF2   | COSTIM_up |
| TMA16    | COSTIM_up |
| HLA-DRB5 | COSTIM_up |
| MAFK     | COSTIM_up |
| GPN1     | COSTIM_up |
| ZNF511   | COSTIM_up |
| WDHD1    | COSTIM_up |
| DDX39B   | COSTIM_up |
| BAZ1A    | COSTIM_up |
| COPS8    | COSTIM_up |
| PPIAP22  | COSTIM_up |
| KLHL9    | COSTIM_up |
| C6orf89  | COSTIM_up |
| CALM1    | COSTIM_up |

FAN1 COSTIM\_up  
EIF1AY COSTIM\_up  
MT-ND6 COSTIM\_up  
IP09 COSTIM\_up  
ANKRD13B COSTIM\_up  
UNC13B COSTIM\_up  
MT-CYB COSTIM\_up  
CTR9 COSTIM\_up  
MSRB1 COSTIM\_up  
GPATCH3 COSTIM\_up  
CDC42BPB COSTIM\_up  
OXCT2 COSTIM\_up  
RPL10A COSTIM\_up  
COLGALT2 COSTIM\_up  
MT-ND2 COSTIM\_up  
FAM169A COSTIM\_up  
MT-ND5 COSTIM\_up  
CN0T7 COSTIM\_up  
MTOR COSTIM\_up  
ALPK2 COSTIM\_up  
PNP COSTIM\_up  
FOXJ3 COSTIM\_up  
SFT2D1 COSTIM\_up  
INPP5F COSTIM\_up  
HMG2 COSTIM\_up  
UBE2J1 COSTIM\_up  
OPA1 COSTIM\_up  
RZR3 COSTIM\_up  
KTI12 COSTIM\_up  
SELEN0T COSTIM\_up  
TOX COSTIM\_up  
RUSC2 COSTIM\_up  
OSTC COSTIM\_up  
TSEN15 COSTIM\_up  
GRK5 COSTIM\_up  
TYW1 COSTIM\_up  
DCAF12 COSTIM\_up  
ITPRIPL1 COSTIM\_up  
MT-ND4 COSTIM\_up  
MT-ND1 COSTIM\_up  
PRMT6 COSTIM\_up  
CAPZA2 COSTIM\_up  
MT-ATP6 COSTIM\_up  
TOP1 COSTIM\_up  
C1orf174 COSTIM\_up  
SPOUT1 COSTIM\_up  
RPL39 COSTIM\_up  
DCLRE1A COSTIM\_up  
APRT COSTIM\_up  
CCDC167 COSTIM\_up



MT-C03 COSTIM\_up  
SMG5 COSTIM\_up  
RNVU1-22 COSTIM\_up  
RN7SKP90 COSTIM\_up  
SNORD1B COSTIM\_up  
SNORA73B COSTIM\_up  
RNU6-1214P COSTIM\_up  
SNORA33 COSTIM\_up  
SNORD14E COSTIM\_up  
SNORA74A COSTIM\_up  
RNY1 COSTIM\_up  
RNU6-777P COSTIM\_up  
SNORA65 COSTIM\_up  
SNORD14B COSTIM\_up  
RNVU1-6 COSTIM\_up  
RNU6-619P COSTIM\_up  
RNY3 COSTIM\_up  
VTRNA1-3 COSTIM\_up  
E2F3P2 COSTIM\_up  
OR2T5 COSTIM\_up  
COX20 COSTIM\_up  
CENPW COSTIM\_up  
PRR9 COSTIM\_up  
EEF1AKMT2 COSTIM\_up  
GDI1 COSTIM\_up  
LINC00963 COSTIM\_up  
TRAF3IP1 COSTIM\_up  
ASAH2B COSTIM\_up  
AGAP6 COSTIM\_up  
TIMM23B COSTIM\_up  
ZDHHC18 COSTIM\_up  
AGAP9 COSTIM\_up  
BMS1P1 COSTIM\_up  
MAC01 COSTIM\_up  
PTPN20 COSTIM\_up  
RPL12P16 COSTIM\_up  
DAXX COSTIM\_up  
PFDN6 COSTIM\_up  
RING1 COSTIM\_up  
HSD17B8 COSTIM\_up  
RXRB COSTIM\_up  
BRD2 COSTIM\_up  
PSMB8 COSTIM\_up  
TAP2 COSTIM\_up  
NBDY COSTIM\_up  
HLA-DRA COSTIM\_up  
RNF5 COSTIM\_up  
AGPAT1 COSTIM\_up  
FKBPL COSTIM\_up  
MRPL38 COSTIM\_up

|          |           |
|----------|-----------|
| STK19    | COSTIM_up |
| SKIV2L   | COSTIM_up |
| NELFE    | COSTIM_up |
| SDHD     | COSTIM_up |
| NEU1     | COSTIM_up |
| SNHG32   | COSTIM_up |
| HSPA1B   | COSTIM_up |
| HSPA1A   | COSTIM_up |
| LSM2     | COSTIM_up |
| VAR51    | COSTIM_up |
| MSH5     | COSTIM_up |
| CSNK2B   | COSTIM_up |
| GPANK1   | COSTIM_up |
| BAG6     | COSTIM_up |
| PRRC2A   | COSTIM_up |
| LST1     | COSTIM_up |
| NFKBIL1  | COSTIM_up |
| ZNF814   | COSTIM_up |
| MICB     | COSTIM_up |
| ZNF551   | COSTIM_up |
| ZNF805   | COSTIM_up |
| HLA-C    | COSTIM_up |
| DHX16    | COSTIM_up |
| MRPS18B  | COSTIM_up |
| ABCF1    | COSTIM_up |
| PRR3     | COSTIM_up |
| LILRB3   | COSTIM_up |
| GNL1     | COSTIM_up |
| HLA-E    | COSTIM_up |
| PPP1R11  | COSTIM_up |
| RACK1    | COSTIM_up |
| HLA-F    | COSTIM_up |
| ZFP57    | COSTIM_up |
| AKT1S1   | COSTIM_up |
| TRIM27   | COSTIM_up |
| MRPL53   | COSTIM_up |
| DCTN1    | COSTIM_up |
| FAM216A  | COSTIM_up |
| MZT1     | COSTIM_up |
| UQCC3    | COSTIM_up |
| ZNF783   | COSTIM_up |
| C12orf73 | COSTIM_up |
| SLC35B4  | COSTIM_up |
| PSENFEN  | COSTIM_up |
| ZBTB10   | COSTIM_up |
| C4orf46  | COSTIM_up |
| PSMB10   | COSTIM_up |
| E2F4     | COSTIM_up |
| TMEM170B | COSTIM_up |
| SARNP    | COSTIM_up |

IP07 COSTIM\_up  
PRR13 COSTIM\_up  
NAP1L4 COSTIM\_up  
TMSB4X COSTIM\_up  
SMN2 COSTIM\_up  
SERF1B COSTIM\_up  
HMG1 COSTIM\_up  
EIF3CL COSTIM\_up  
DPF3 COSTIM\_up  
RNPS1 COSTIM\_up  
HSP90AB2P COSTIM\_up  
DNAJC19 COSTIM\_up  
JPT2 COSTIM\_up  
HCP5 COSTIM\_up  
HLA-H COSTIM\_up  
HLA-A COSTIM\_up  
ANKRD28 COSTIM\_up  
THUMP3-AS1 COSTIM\_up  
RNU6-431P COSTIM\_up  
SNORD58A COSTIM\_up  
SNORD24 COSTIM\_up  
RNU6-608P COSTIM\_up  
SNORD21 COSTIM\_up  
SNORD101 COSTIM\_up  
RNVU1-30 COSTIM\_up  
SNORA75 COSTIM\_up  
SNORD51 COSTIM\_up  
RNVU1-15 COSTIM\_up  
SNORD20 COSTIM\_up  
RNU6-1127P COSTIM\_up  
MIR181A2 COSTIM\_up  
SNORD12C COSTIM\_up  
SNORD83B COSTIM\_up  
SNORD83A COSTIM\_up  
MT-TF COSTIM\_up  
MT-TV COSTIM\_up  
MT-TQ COSTIM\_up  
MT-TA COSTIM\_up  
MT-TN COSTIM\_up  
MT-TC COSTIM\_up  
MT-TY COSTIM\_up  
MT-TE COSTIM\_up  
GPX3 COSTIM\_up  
SELEN0H COSTIM\_up  
STK38L COSTIM\_up  
TSN COSTIM\_up  
IGLV2-14 COSTIM\_up  
IGLC1 COSTIM\_up  
IGLC2 COSTIM\_up  
PRR22 COSTIM\_up

TAS2R15P COSTIM\_up  
TAS2R13 COSTIM\_up  
SNORD19 COSTIM\_up  
SNORA26 COSTIM\_up  
LINC02693 COSTIM\_up  
RNF208 COSTIM\_up  
MT-ND4L COSTIM\_up  
NUP62 COSTIM\_up  
AURKAP1 COSTIM\_up  
DENND1B COSTIM\_up  
SCAF8 COSTIM\_up  
CRIP1 COSTIM\_up  
KLHL23 COSTIM\_up  
RPL22P1 COSTIM\_up  
TRIM59 COSTIM\_up  
BTF3L4P2 COSTIM\_up  
DNLZ COSTIM\_up  
NPM1P32 COSTIM\_up  
RBMS2P1 COSTIM\_up  
NRAS COSTIM\_up  
ANKRD39 COSTIM\_up  
QTRT1 COSTIM\_up  
CHUK COSTIM\_up  
RPS3P6 COSTIM\_up  
COG8 COSTIM\_up  
HAUS7 COSTIM\_up  
SYNJ2BP COSTIM\_up  
ARL2 COSTIM\_up  
FIRRE COSTIM\_up  
RBMXL1 COSTIM\_up  
SRA1 COSTIM\_up  
YBX1P6 COSTIM\_up  
DNAJC9 COSTIM\_up  
RPLP0P6 COSTIM\_up  
VDAC1 COSTIM\_up  
ZBTB9 COSTIM\_up  
TMX2 COSTIM\_up  
NDUFS3 COSTIM\_up  
ADAT3 COSTIM\_up  
PPP1CB COSTIM\_up  
LAT COSTIM\_up  
RPL17P50 COSTIM\_up  
CLIC1 COSTIM\_up  
RPS29 COSTIM\_up  
CENPBD1P1 COSTIM\_up  
GTF2H4 COSTIM\_up  
DDX47 COSTIM\_up  
TMX2P1 COSTIM\_up  
RPL21P75 COSTIM\_up  
YBX1P10 COSTIM\_up

RPL13AP7 COSTIM\_up  
ITGA1 COSTIM\_up  
NUDT19 COSTIM\_up  
PGAM1P7 COSTIM\_up  
REPIN1 COSTIM\_up  
MRPL23 COSTIM\_up  
TSPAN4 COSTIM\_up  
LYRM4 COSTIM\_up  
MYCBP COSTIM\_up  
ALG3 COSTIM\_up  
ST7-OT4 COSTIM\_up  
ZNF788P COSTIM\_up  
SH3D21 COSTIM\_up  
SMIM30 COSTIM\_up  
TTC41P COSTIM\_up  
EEF1A1P12 COSTIM\_up  
HNRNPA1P10 COSTIM\_up  
FIS1 COSTIM\_up  
SOGA3 COSTIM\_up  
RPS3AP26 COSTIM\_up  
FAM187A COSTIM\_up  
PPME1 COSTIM\_up  
NUTM2D COSTIM\_up  
B3GNT10 COSTIM\_up  
IFRD2 COSTIM\_up  
ZBED1 COSTIM\_up  
TOMM6 COSTIM\_up  
HNRNPUL2 COSTIM\_up  
CYCSP55 COSTIM\_up  
LRRC69 COSTIM\_up  
DNAJA1P3 COSTIM\_up  
PHB2 COSTIM\_up  
NEURL4 COSTIM\_up  
UBXN2B COSTIM\_up  
CBWD6 COSTIM\_up  
PEX26 COSTIM\_up  
FASTKD5 COSTIM\_up  
HOMEZ COSTIM\_up  
DDX3X COSTIM\_up  
VPS16 COSTIM\_up  
MYL5 COSTIM\_up  
MIR17HG COSTIM\_up  
MCM3AP-AS1 COSTIM\_up  
AATBC COSTIM\_up  
GCGR COSTIM\_up  
KRT19P2 COSTIM\_up  
IFI30 COSTIM\_up  
MTC02P33 COSTIM\_up  
HMGB1P17 COSTIM\_up  
PAM16 COSTIM\_up

TATDN2P2 COSTIM\_up  
NEPNP COSTIM\_up  
MORF4L1P1 COSTIM\_up  
ZNF579 COSTIM\_up  
ARL4AP5 COSTIM\_up  
RNASEK COSTIM\_up  
PPIAP9 COSTIM\_up  
ZSCAN12P1 COSTIM\_up  
ASS1P1 COSTIM\_up  
RPL21P16 COSTIM\_up  
HSPE1P26 COSTIM\_up  
MIR663B COSTIM\_up  
PPP3R1 COSTIM\_up  
AP4M1 COSTIM\_up  
HMSD COSTIM\_up  
PPP2R2A COSTIM\_up  
TRIM16 COSTIM\_up  
UBA52 COSTIM\_up  
BTBD19 COSTIM\_up  
CYTOR COSTIM\_up  
SNORD19C COSTIM\_up  
SNORD12B COSTIM\_up  
RNA5SP44 COSTIM\_up  
RNU2-63P COSTIM\_up  
MIR1913 COSTIM\_up  
NUTM2A-AS1 COSTIM\_up  
EXOSC6 COSTIM\_up  
HLA-DQB1-AS1 COSTIM\_up  
SAMSN1-AS1 COSTIM\_up  
LINC00571 COSTIM\_up  
AFG3L1P COSTIM\_up  
MIR181A2HG COSTIM\_up  
RPS24P8 COSTIM\_up  
MIR3681HG COSTIM\_up  
C5orf66 COSTIM\_up  
DTNB-AS1 COSTIM\_up  
MDC1-AS1 COSTIM\_up  
HSP90AA2P COSTIM\_up  
ADM5 COSTIM\_up  
SMIM13 COSTIM\_up  
HNRNPA1P48 COSTIM\_up  
SVIL-AS1 COSTIM\_up  
RPS27AP16 COSTIM\_up  
LINC00240 COSTIM\_up  
MRPL20-AS1 COSTIM\_up  
NDUFAF8 COSTIM\_up  
VPS26BP1 COSTIM\_up  
DYNC1I2P1 COSTIM\_up  
SLC9A3-AS1 COSTIM\_up  
GOLGA2P7 COSTIM\_up

NPM1P39 COSTIM\_up  
LINC00618 COSTIM\_up  
RPSAP58 COSTIM\_up  
RBMS1P1 COSTIM\_up  
C2CD4D COSTIM\_up  
MTND2P28 COSTIM\_up  
MCRIP1 COSTIM\_up  
FGD5-AS1 COSTIM\_up  
NPM1P18 COSTIM\_up  
OR6V1 COSTIM\_up  
RUSC1-AS1 COSTIM\_up  
NOL7 COSTIM\_up  
MTND1P23 COSTIM\_up  
YBX1P8 COSTIM\_up  
UQCRFS1P1 COSTIM\_up  
GTF2H2B COSTIM\_up  
CFLAR-AS1 COSTIM\_up  
SLC16A1-AS1 COSTIM\_up  
PLCL2-AS1 COSTIM\_up  
TMEM185B COSTIM\_up  
TEX41 COSTIM\_up  
NAALADL2-AS2 COSTIM\_up  
LINC01276 COSTIM\_up  
DANCR COSTIM\_up  
LTA COSTIM\_up  
LINC01692 COSTIM\_up  
FUNDC2P4 COSTIM\_up  
WDR46 COSTIM\_up  
RPS28P7 COSTIM\_up  
LINC01630 COSTIM\_up  
LINC02672 COSTIM\_up  
MIR663AHG COSTIM\_up  
SCAMP4 COSTIM\_up  
RCC2-AS1 COSTIM\_up  
MYL12BP2 COSTIM\_up  
RPL23AP89 COSTIM\_up  
RAPGEF4-AS1 COSTIM\_up  
PABPC4-AS1 COSTIM\_up  
MELTF-AS1 COSTIM\_up  
NACA4P COSTIM\_up  
GAPDHP1 COSTIM\_up  
MT-ATP8 COSTIM\_up  
PSMD8P1 COSTIM\_up  
FAM174C COSTIM\_up  
LINC02474 COSTIM\_up  
OST4 COSTIM\_up  
MIR34AHG COSTIM\_up  
SNHG26 COSTIM\_up  
SAPCD1 COSTIM\_up  
HCG22 COSTIM\_up

LINC01128 COSTIM\_up  
RASA4CP COSTIM\_up  
AKR7A2P1 COSTIM\_up  
RPL41 COSTIM\_up  
ST13P13 COSTIM\_up  
RALGAPA1P1 COSTIM\_up  
RPL4P4 COSTIM\_up  
NAMPTP1 COSTIM\_up  
PET100 COSTIM\_up  
RPL4P6 COSTIM\_up  
TPRG1-AS2 COSTIM\_up  
ACBD6 COSTIM\_up  
EXOSC10-AS1 COSTIM\_up  
HLA-K COSTIM\_up  
YY2 COSTIM\_up  
LINC02541 COSTIM\_up  
HSBP1 COSTIM\_up  
ECE1-AS1 COSTIM\_up  
HLA-DPA1 COSTIM\_up  
RPS18 COSTIM\_up  
PRH1 COSTIM\_up  
MTND5P15 COSTIM\_up  
TAPBP COSTIM\_up  
FAM242A COSTIM\_up  
LSM12P1 COSTIM\_up  
TMA7 COSTIM\_up  
MCTS1 COSTIM\_up  
IMPDH1P10 COSTIM\_up  
USP12-AS1 COSTIM\_up  
SMIM26 COSTIM\_up  
AJM1 COSTIM\_up  
EMSLR COSTIM\_up  
EEF1B2P3 COSTIM\_up  
MRTFA-AS1 COSTIM\_up  
MRAP-AS1 COSTIM\_up  
HLA-DQB2 COSTIM\_up  
LINC00665 COSTIM\_up  
PET117 COSTIM\_up  
SNHG15 COSTIM\_up  
VPS13A-AS1 COSTIM\_up  
SNHG7 COSTIM\_up  
NPIPA9 COSTIM\_up  
EEF1A1P14 COSTIM\_up  
LINC00456 COSTIM\_up  
LINC01762 COSTIM\_up  
KLF4P1 COSTIM\_up  
SNRPEP4 COSTIM\_up  
EEF1A1P6 COSTIM\_up  
HNRNPLP1 COSTIM\_up  
FAM224A COSTIM\_up



KRT8P39 COSTIM\_up  
GAS6-AS1 COSTIM\_up  
YEATS2-AS1 COSTIM\_up  
TXNP6 COSTIM\_up  
NUDT9P1 COSTIM\_up  
TPT1P1 COSTIM\_up  
TRIM26 COSTIM\_up  
HSPA8P1 COSTIM\_up  
LINC01283 COSTIM\_up  
GAPDHP49 COSTIM\_up  
C2CD4D-AS1 COSTIM\_up  
RPSAP9 COSTIM\_up  
YWHAEP5 COSTIM\_up  
GAS5 COSTIM\_up  
EIF5AP4 COSTIM\_up  
HLA-B COSTIM\_up  
FOXP4-AS1 COSTIM\_up  
LINC02621 COSTIM\_up  
SLC25A25-AS1 COSTIM\_up  
HSPA8P3 COSTIM\_up  
NXT1-AS1 COSTIM\_up  
RPL23AP42 COSTIM\_up  
HNRNPUL2-BSCL2 COSTIM\_up  
LINC00163 COSTIM\_up  
EIF3EP1 COSTIM\_up  
MIR155HG COSTIM\_up  
SNHG20 COSTIM\_up  
FABP5P7 COSTIM\_up  
COX20P2 COSTIM\_up  
HGH1 COSTIM\_up  
SNORA71B COSTIM\_up  
L3MBTL2-AS1 COSTIM\_up  
RPL6P27 COSTIM\_up  
NUS1P1 COSTIM\_up  
H3P6 COSTIM\_up  
BHLHE40-AS1 COSTIM\_up  
CPB2-AS1 COSTIM\_up  
ASMTL-AS1 COSTIM\_up  
TAS2R39 COSTIM\_up  
KCNMA1-AS1 COSTIM\_up  
RPL13AP5 COSTIM\_up  
BCL2L1-AS1 COSTIM\_up  
EIF1AXP1 COSTIM\_up  
MKLN1-AS COSTIM\_up  
LINC00106 COSTIM\_up  
PRMT5-AS1 COSTIM\_up  
CDKN2AIPNL COSTIM\_up  
ZNF295-AS1 COSTIM\_up  
RSL24D1P8 COSTIM\_up  
SMG1P1 COSTIM\_up

TTN-AS1 COSTIM\_up  
SRRM1P3 COSTIM\_up  
RNF223 COSTIM\_up  
WAKMAR2 COSTIM\_up  
HLA-DQA2 COSTIM\_up  
KLF7-IT1 COSTIM\_up  
CELF2-AS2 COSTIM\_up  
TNFRSF14-AS1 COSTIM\_up  
LRIG2-DT COSTIM\_up  
TMEM250 COSTIM\_up  
RNVU1-2 COSTIM\_up  
NME1 COSTIM\_up  
APOBEC3G COSTIM\_up  
MRPS17 COSTIM\_up  
GET4 COSTIM\_up  
ADSL COSTIM\_up  
LILRA4 COSTIM\_up  
RN7SL254P COSTIM\_up  
RPS2P5 COSTIM\_up  
RPL23AP7 COSTIM\_up  
RPL13P5 COSTIM\_up  
SETP14 COSTIM\_up  
L1TD1 COSTIM\_up  
ISY1 COSTIM\_up  
RN7SL288P COSTIM\_up  
TMEM189 COSTIM\_up  
RDH14 COSTIM\_up  
MIF COSTIM\_up  
TPM3P9 COSTIM\_up  
ARHGAP31-AS1 COSTIM\_up  
RN7SL443P COSTIM\_up  
RN7SL302P COSTIM\_up  
CRCP COSTIM\_up  
PDXP COSTIM\_up  
RPP21 COSTIM\_up  
ATP5MF COSTIM\_up  
PSMC1P1 COSTIM\_up  
CBX5P1 COSTIM\_up  
ARPC4 COSTIM\_up  
ARPC1A COSTIM\_up  
ATP5P0 COSTIM\_up  
PLEKH02 COSTIM\_up  
PISD COSTIM\_up  
PWP2 COSTIM\_up  
RPL7AP6 COSTIM\_up  
MTFP1 COSTIM\_up  
SNHG3 COSTIM\_up  
ARFGAP3 COSTIM\_up  
EIF6 COSTIM\_up  
MRPL20 COSTIM\_up

DECR2 COSTIM\_up  
GNG10 COSTIM\_up  
CNTF COSTIM\_up  
RN7SL40P COSTIM\_up  
AP5Z1 COSTIM\_up  
RN7SL846P COSTIM\_up  
RPS26P21 COSTIM\_up  
EIF4EBP3 COSTIM\_up  
MRPL33 COSTIM\_up  
PPAN-P2RY11 COSTIM\_up  
TICAM2 COSTIM\_up  
C4orf48 COSTIM\_up  
NME2 COSTIM\_up  
TTC4 COSTIM\_up  
HLA-L COSTIM\_up  
LINC02044 COSTIM\_up  
MRPS6 COSTIM\_up  
ACY1 COSTIM\_up  
FAM86DP COSTIM\_up  
DDOST COSTIM\_up  
TMEM199 COSTIM\_up  
ATP1B3-AS1 COSTIM\_up  
P2RY11 COSTIM\_up  
TMEM141 COSTIM\_up  
TMEM225B COSTIM\_up  
SIAH2-AS1 COSTIM\_up  
RPL7P23 COSTIM\_up  
RBM12 COSTIM\_up  
RN7SL396P COSTIM\_up  
UBE2V1 COSTIM\_up  
SMARCA5-AS1 COSTIM\_up  
EEF1A1P4 COSTIM\_up  
ARNTL2-AS1 COSTIM\_up  
SNHG6 COSTIM\_up  
RRS1-AS1 COSTIM\_up  
SOCS2-AS1 COSTIM\_up  
PGAM5 COSTIM\_up  
SNHG10 COSTIM\_up  
ZCCHC3 COSTIM\_up  
DNAJC3-DT COSTIM\_up  
SPTY2D10S COSTIM\_up  
MARS2 COSTIM\_up  
MTND4P12 COSTIM\_up  
NRAV COSTIM\_up  
ANK2-AS1 COSTIM\_up  
CDK11B COSTIM\_up  
MTATP6P1 COSTIM\_up  
LY75-CD302 COSTIM\_up  
ATP5MF-PTCD1 COSTIM\_up  
LINC02362 COSTIM\_up

HAUS5 COSTIM\_up  
EEF1A1P9 COSTIM\_up  
IL20RB-AS1 COSTIM\_up  
SERBP1P5 COSTIM\_up  
NOP14-AS1 COSTIM\_up  
PVT1 COSTIM\_up  
PDCD6 COSTIM\_up  
LINC02223 COSTIM\_up  
YJEFN3 COSTIM\_up  
ANKRD33B-AS1 COSTIM\_up  
ARPC4-TTLL3 COSTIM\_up  
EEF1A1P13 COSTIM\_up  
PKD1P6 COSTIM\_up  
MRPS31P4 COSTIM\_up  
LINC02260 COSTIM\_up  
CHCHD10 COSTIM\_up  
ZBED3-AS1 COSTIM\_up  
LINC01181 COSTIM\_up  
TMED7-TICAM2 COSTIM\_up  
HSPD1P11 COSTIM\_up  
CENPS-CORT COSTIM\_up  
LINC02201 COSTIM\_up  
SNORA74D COSTIM\_up  
RNU7-13P COSTIM\_up  
RNU6-786P COSTIM\_up  
RNU6-1003P COSTIM\_up  
KLF3P1 COSTIM\_up  
C8orf88 COSTIM\_up  
SHLD3 COSTIM\_up  
LINC01845 COSTIM\_up  
SERPINE3 COSTIM\_up  
LINC02099 COSTIM\_up  
MIR3142HG COSTIM\_up  
MTC01P4 COSTIM\_up  
ALG11 COSTIM\_up  
PRKDC COSTIM\_up  
MTND1P5 COSTIM\_up  
SLC2A3P1 COSTIM\_up  
THAP12P7 COSTIM\_up  
LYN COSTIM\_up  
PINX1 COSTIM\_up  
LINC02055 COSTIM\_up  
LINC02365 COSTIM\_up  
CHKB-CPT1B COSTIM\_up  
LINC02732 COSTIM\_up  
SLC25A1P1 COSTIM\_up  
CHMP4A COSTIM\_up  
PHBP2 COSTIM\_up  
BBOX1-AS1 COSTIM\_up  
PKD1P5 COSTIM\_up

MEX3A COSTIM\_up  
EEF1G COSTIM\_up  
MPV17L2 COSTIM\_up  
BORCS8 COSTIM\_up  
DPP3 COSTIM\_up  
ANKHD1-EIF4EBP3 COSTIM\_up  
BRK1 COSTIM\_up  
LINC02739 COSTIM\_up  
ZFP91-CNTF COSTIM\_up  
EID3 COSTIM\_up  
MSH5-SAPCD1 COSTIM\_up  
HTD2 COSTIM\_up  
NECTIN1-AS1 COSTIM\_up  
EID1 COSTIM\_up  
UVRAG-DT COSTIM\_up  
POLR2M COSTIM\_up  
FDXACB1 COSTIM\_up  
RAB44 COSTIM\_up  
SNHG1 COSTIM\_up  
GOLGA2P10 COSTIM\_up  
CCND2-AS1 COSTIM\_up  
COA8 COSTIM\_up  
LINC00944 COSTIM\_up  
SMLR1 COSTIM\_up  
HMBS COSTIM\_up  
HSPA8P5 COSTIM\_up  
SMIM10L1 COSTIM\_up  
PPP1R14B-AS1 COSTIM\_up  
LSM14A COSTIM\_up  
GATC COSTIM\_up  
LINC02388 COSTIM\_up  
ZNF271P COSTIM\_up  
HSPD1P4 COSTIM\_up  
GIHCG COSTIM\_up  
CPNE8-AS1 COSTIM\_up  
CNPY2 COSTIM\_up  
LINC02416 COSTIM\_up  
CLEC5A COSTIM\_up  
NENFP2 COSTIM\_up  
CHURC1 COSTIM\_up  
C17orf49 COSTIM\_up  
RTEL1 COSTIM\_up  
PDF COSTIM\_up  
LINC00641 COSTIM\_up  
BCL2L2-PABPN1 COSTIM\_up  
HSPE1P2 COSTIM\_up  
EEF1A1P33 COSTIM\_up  
NDUFC2-KCTD14 COSTIM\_up  
LINC00924 COSTIM\_up  
CSPG4P12 COSTIM\_up

ZHX1-C8orf76 COSTIM\_up  
INAFM2 COSTIM\_up  
TGIF2-RAB5IF COSTIM\_up  
UBE2Q2P2 COSTIM\_up  
THTPA COSTIM\_up  
MRPL46 COSTIM\_up  
TYR03P COSTIM\_up  
EHD4-AS1 COSTIM\_up  
IL21R-AS1 COSTIM\_up  
RBM15B COSTIM\_up  
NORAD COSTIM\_up  
LINC02166 COSTIM\_up  
SNHG19 COSTIM\_up  
ATP2A1-AS1 COSTIM\_up  
SLC7A5P1 COSTIM\_up  
LINC01963 COSTIM\_up  
LINC01311 COSTIM\_up  
TMEM178B COSTIM\_up  
ZNF865 COSTIM\_up  
BOP1 COSTIM\_up  
VPS9D1-AS1 COSTIM\_up  
TMEM249 COSTIM\_up  
GAN COSTIM\_up  
LINC02605 COSTIM\_up  
LINC00662 COSTIM\_up  
LINC01978 COSTIM\_up  
COR07 COSTIM\_up  
MIR193BHG COSTIM\_up  
LINC01979 COSTIM\_up  
OVCA2 COSTIM\_up  
MRPL12 COSTIM\_up  
CCNQ COSTIM\_up  
MIR378H COSTIM\_up  
RN7SL471P COSTIM\_up  
AK4P1 COSTIM\_up  
UBBP4 COSTIM\_up  
RN7SL4P COSTIM\_up  
LINC00667 COSTIM\_up  
SNORD43 COSTIM\_up  
MIR4439 COSTIM\_up  
SINHCAFP1 COSTIM\_up  
RHEX COSTIM\_up  
MIR3681 COSTIM\_up  
MIR4670 COSTIM\_up  
RNU4ATAC COSTIM\_up  
RN7SL753P COSTIM\_up  
MIR548AC COSTIM\_up  
MIR3648-2 COSTIM\_up  
OTUD7B COSTIM\_up  
MIR4511 COSTIM\_up

SNORD3C COSTIM\_up  
AGAP12P COSTIM\_up  
MIR3142 COSTIM\_up  
RBM8A COSTIM\_up  
TIMM23 COSTIM\_up  
RNF115 COSTIM\_up  
RPL17 COSTIM\_up  
MAFG-DT COSTIM\_up  
RN7SL5P COSTIM\_up  
SNHG25 COSTIM\_up  
NCOA4 COSTIM\_up  
MRPS21 COSTIM\_up  
AARSD1 COSTIM\_up  
UPK3BL1 COSTIM\_up  
MIR497HG COSTIM\_up  
S1PR2 COSTIM\_up  
FDX2 COSTIM\_up  
SMIM22 COSTIM\_up  
NDUFV2P1 COSTIM\_up  
NDUFA7 COSTIM\_up  
ZNF587B COSTIM\_up  
PTOV1-AS2 COSTIM\_up  
SPIB COSTIM\_up  
SNHG8 COSTIM\_up  
COMMD3-BMI1 COSTIM\_up  
FMC1-LUC7L2 COSTIM\_up  
MIR222HG COSTIM\_up  
GAS5-AS1 COSTIM\_up  
TERC COSTIM\_up  
NCBP2AS2 COSTIM\_up  
TAF15 COSTIM\_up  
RNVU1-31 COSTIM\_up  
RPS10-NUDT3 COSTIM\_up  
HNRNPA3P9 COSTIM\_up  
NUDT4P2 COSTIM\_up  
ARMCX5-GPRASP2 COSTIM\_up  
BNIP3P4 COSTIM\_up  
SRXN1 COSTIM\_up  
NBPF19 COSTIM\_up  
SNORA51 COSTIM\_up  
LINC02343 COSTIM\_up  
OR2AS2P COSTIM\_up  
SNORD14A COSTIM\_up  
GTF2H5 COSTIM\_up  
NUDT3 COSTIM\_up  
KMT2B COSTIM\_up  
DCP1A COSTIM\_up  
ATP6V1FNB COSTIM\_up  
CWC25 COSTIM\_up  
EPOP COSTIM\_up

CYFIP1 COSTIM\_up  
TAF9 COSTIM\_up  
NOL12 COSTIM\_up  
RN7SL2 COSTIM\_up  
SNORD1C COSTIM\_up  
RNVU1-27 COSTIM\_up  
SOCS7 COSTIM\_up  
H2BC6 COSTIM\_up  
RNVU1-25 COSTIM\_up  
NPEPPSP1 COSTIM\_up  
RCC1L COSTIM\_up  
SPDYE10P COSTIM\_up  
RN7SKP236 COSTIM\_up  
RNA5-8SN5 COSTIM\_up  
TBC1D3I COSTIM\_up  
RNU11 COSTIM\_up  
MLLT6 COSTIM\_up  
HMGB1P24 COSTIM\_up  
PPP4R3B COSTIM\_up  
SNORD91B COSTIM\_up  
LENG9 COSTIM\_up  
RNA5-8SN3 COSTIM\_up  
RNVU1-26 COSTIM\_up  
MIR1299 COSTIM\_up  
HNF1B COSTIM\_up  
RNVU1-19 COSTIM\_up  
AATF COSTIM\_up  
MIR3648-1 COSTIM\_up  
TUBGCP5 COSTIM\_up  
IKBKGP1 COSTIM\_up  
U2AF1L5 COSTIM\_up  
SNORD27 COSTIM\_up  
ORAI1 COSTIM\_up  
RN7SL1 COSTIM\_up  
TADA2A COSTIM\_up  
PIP4K2B COSTIM\_up  
RNA5-8SN4 COSTIM\_up  
CSPG4P10 COSTIM\_up  
MIR6821 COSTIM\_up  
LINC02227 COSTIM\_up  
MIR6797 COSTIM\_up  
PIGW COSTIM\_up  
GPR179 COSTIM\_up  
SEC22B4P COSTIM\_up  
MARCKS COSTIM\_up  
GPIHBP1 COSTIM\_up  
CCL3 COSTIM\_up  
PSMB3 COSTIM\_up  
SEN3-EIF4A1 COSTIM\_up  
DDX52 COSTIM\_up



RNA5-8SN1 COSTIM\_up  
RNA5-8SN2 COSTIM\_up  
MY019 COSTIM\_up  
GGNBP2 COSTIM\_up  
PMS2P2 COSTIM\_up  
DHRS11 COSTIM\_up  
ACACA COSTIM\_up  
C11orf98 COSTIM\_up  
MRM1 COSTIM\_up  
GOLGA6L10 COSTIM\_up  
RN7SL3 COSTIM\_up  
MRPL45 COSTIM\_up  
SND1-IT1 COSTIM\_up  
OR2T11 COSTIM\_up  
WASH9P COSTIM\_up  
BCLAF1P2 COSTIM\_up  
TMEM75 COSTIM\_up  
ERICD COSTIM\_up  
LINC01943 COSTIM\_up  
JAKMIP2-AS1 COSTIM\_up  
PAGR1 COSTIM\_up  
SLFNL1-AS1 COSTIM\_up  
ABALON COSTIM\_up  
SNHG4 COSTIM\_up  
WASH5P COSTIM\_up  
PCBP2-OT1 COSTIM\_up  
HYMAI COSTIM\_up  
MIR4521 COSTIM\_up  
SC02 COSTIM\_up  
SMIM38 COSTIM\_up  
EEF1AKMT4 COSTIM\_up  
TBCE COSTIM\_up  
GGT1 COSTIM\_up  
DERPC COSTIM\_up  
RNVU1-8 COSTIM\_up
