# Supplementary material for: Distinct stage-specific transcriptional states of B cells derived from human tonsillar tissue
Source: PubMed Central journal article supplement (PMC10132144; doi:10.1172/jci.insight.155199), 2023-04-10
Supplement: jciinsight-8-155199-s232.pdf [file jciinsight-8-155199-s232.pdf]

| feature               | group     | avgExpr | logFC                 | statistic          | auc | pval |
|-----------------------|-----------|---------|-----------------------|--------------------|-----|------|
| padj                  | pct_in    | pct_out |                       |                    |     |      |
| ATF1-regulon          | Activated |         |                       | 0.115282891346733  |     |      |
| 0.00944753984421344   |           |         | 55666838              | 0.681446360306627  |     |      |
| 1.08353600431113e-156 |           |         | 6.41092135884088e-156 | 100                | 100 |      |
| ATF3-regulon          | Activated |         |                       | 0.0709182646823648 |     |      |
| 0.0207555023509353    |           |         | 65221267.5            | 0.798407039977013  |     | 0    |
| 0                     | 100       | 100     |                       |                    |     |      |
| ATF4-regulon          | Activated |         |                       | 0.125604397215999  |     |      |
| 0.0175803622398163    |           |         | 59208270.5            | 0.724798854791703  |     |      |
| 2.1157655784312e-239  |           |         | 2.31106701644023e-238 | 100                | 100 |      |
| ATF5-regulon          | Activated |         |                       | 0.125307174692447  |     |      |
| 0.00717050244946621   |           |         | 46137207.5            | 0.564789257934619  |     |      |
| 1.68806183996941e-21  |           |         | 3.28362714076242e-21  | 100                |     |      |
| 99.9977010437262      |           |         |                       |                    |     |      |
| ATF6-regulon          | Activated |         |                       |                    |     |      |
| 0.132908195633545     |           |         | -0.00365710853031054  | 42714479           |     |      |
| 0.522889880092415     |           |         | 0.000767297673447804  |                    |     |      |
| 0.000972823835978466  |           |         | 100                   | 100                |     |      |
| ATF6B-regulon         | Activated |         |                       | 0.0575383321125472 |     |      |
| 0.000252261160736872  |           |         | 43519060.0332031      | 0.532739169837379  |     |      |
| 1.49182100783425e-06  |           |         | 2.09741171398479e-06  | 99.8402555910543   |     |      |
| 99.9241344429629      |           |         |                       |                    |     |      |
| BACH1-regulon         | Activated |         |                       | 0.056524256874996  |     |      |
| 0.0138131113678839    |           |         | 55149965              | 0.675119052393238  |     |      |
| 4.30066068736415e-146 |           |         | 2.34882237540658e-145 | 100                |     |      |
| 99.5448066577774      |           |         |                       |                    |     |      |
| BATF-regulon          | Activated |         |                       | 0.0397888194025127 |     |      |
| 0.0213803455259567    |           |         | 55509184              | 0.679516436704935  |     |      |
| 1.2793530506638e-172  |           |         | 8.65086348544092e-172 | 75.2928647497338   |     |      |
| 50.6988827072509      |           |         |                       |                    |     |      |
| BATF3-regulon         | Activated |         |                       | 0.0981003034457006 |     |      |
| 0.0155815710564632    |           |         | 54203387              | 0.663531504833121  |     |      |
| 1.17828147642704e-127 |           |         | 5.7695161949186e-127  | 100                | 100 |      |
| BCL11A-regulon        | Activated |         |                       |                    |     |      |
| 0.191107722119286     |           |         | -0.0139708274568562   | 25518116           |     |      |
| 0.312380366746937     |           |         | 2.15107878202696e-167 |                    |     |      |
| 1.38842357749013e-166 |           |         | 100                   | 100                |     |      |
| BHLHE40-regulon       | Activated |         |                       | 0.0646026815849241 |     |      |
| 0.00933798108191049   |           |         | 52916910              | 0.647783079006093  |     |      |
| 1.29912276399642e-104 |           |         | 5.12431756909698e-104 | 100                | 100 |      |
| BRF2-regulon          | Activated |         |                       | 0.0511085794683546 |     |      |
| 0.00990623879018914   |           |         | 53647892              | 0.656731405177406  |     |      |
| 2.02184454312048e-117 |           |         | 8.7000583370639e-117  | 99.9467518636848   |     |      |
| 99.7195273345901      |           |         |                       |                    |     |      |
| CEBPB-regulon         | Activated |         |                       | 0.158725820343702  |     |      |
| 0.0163087790675349    |           |         | 59950323.5            | 0.733882706761248  |     |      |
| 5.79206665817656e-259 |           |         | 7.47703150419156e-258 | 100                | 100 |      |
| CEBPG-regulon         | Activated |         |                       | 0.0850318970096619 |     |      |
| 0.0177038830397894    |           |         | 58511073.5            | 0.716264108160923  |     |      |

|                       |                       |                    |                     |
|-----------------------|-----------------------|--------------------|---------------------|
| 1.00190530559868e-221 | 9.48470355966755e-221 | 100                | 100                 |
| CLOCK-regulon         | Activated             | 0.0177756049539532 |                     |
| 0.00227503585698379   | 43344964.5            | 0.530607976981645  |                     |
| 1.68912215585164e-06  | 2.35152300128365e-06  | 55.4313099041534   |                     |
| 50.9057887718976      |                       |                    |                     |
| CREB1-regulon         | Activated             | 0.0439780625454643 |                     |
| 0.00105033700306615   | 42571888.5            | 0.521144356532422  |                     |
| 0.00188501684287281   | 0.00228779821955504   | 100                |                     |
| 99.9931031311784      |                       |                    |                     |
| CREB3-regulon         | Activated             |                    |                     |
| 0.236162543467567     | -0.00379451563503488  | 41888336           |                     |
| 0.512776639235393     | 0.0603953584510415    | 0.0686091272003832 |                     |
| 100                   | 100                   |                    |                     |
| CREB3L2-regulon       | Activated             |                    |                     |
| 0.122996387577075     | -0.00394404970098702  | 41313636.5         |                     |
| 0.505741447429725     | 0.398741450943733     | 0.416332985544192  |                     |
| 100                   | 100                   |                    |                     |
| CREB3L4-regulon       | Activated             |                    |                     |
| 0.0108892589098173    | -0.000221242377143858 | 40530302.5         |                     |
| 0.496152253532913     | 0.491688489588395     | 0.50594032986632   |                     |
| 30.5644302449414      | 31.3807531380753      |                    |                     |
| CREB5-regulon         | Activated             | 0.0551936085274399 |                     |
| 0.0167109192596535    | 57699203              | 0.70632558430826   |                     |
| 5.28413587637412e-202 | 4.68967059028203e-201 | 99.8935037273695   |                     |
| 99.6114763897191      |                       |                    |                     |
| CREM-regulon          | Activated             | 0.155234552482291  |                     |
| 0.00546101218668354   | 49282065              | 0.603287074122023  |                     |
| 4.72335805326702e-52  | 1.28984008377676e-51  | 100                | 100                 |
| CTCF-regulon          | Activated             |                    |                     |
| 0.361445373524502     | -0.00980049638608332  | 32044556           |                     |
| 0.392273871453627     | 1.82842685569735e-56  |                    |                     |
| 5.09091399037303e-56  | 100                   | 100                |                     |
| CUX1-regulon          | Activated             |                    |                     |
| 0.0683453848486769    | -0.00871330263150961  | 28435156.5         |                     |
| 0.348089358006545     | 1.99048705856917e-110 |                    |                     |
| 8.0756903519092e-110  | 100                   | 100                |                     |
| DDIT3-regulon         | Activated             | 0.0974298942230949 |                     |
| 0.0130623867688133    | 55092057              | 0.674410170817593  |                     |
| 6.27507942571583e-145 | 3.30022695722832e-144 | 100                | 100                 |
| E2F1-regulon          | Activated             | 0.41527431284209   | -0.0233886124210815 |
| 31319513.5            | 0.383398253752967     |                    |                     |
| 7.72594600016931e-66  | 2.43796518227565e-65  | 100                | 100                 |
| E2F2-regulon          | Activated             |                    |                     |
| 0.0495272455601046    | -0.00458344365810631  | 33795814           |                     |
| 0.413711920262109     | 7.3905748767054e-37   |                    |                     |
| 1.69268005240672e-36  | 100                   | 100                |                     |
| E2F3-regulon          | Activated             | 0.0248268011384617 |                     |
| 0.00387174051199218   | 51701268              | 0.632901780802378  |                     |
| 5.67006041714376e-85  | 2.11881205061688e-84  | 100                | 100                 |
| E2F4-regulon          | Activated             | 0.418412345176259  |                     |

|                       |                       |                      |     |   |
|-----------------------|-----------------------|----------------------|-----|---|
| 0.0206077260724427    | 53888284              | 0.659674167140046    |     |   |
| 8.5094944496894e-122  | 3.77608816204967e-121 | 100                  | 100 |   |
| E2F6-regulon          | Activated             | 0.0854968420534152   |     |   |
| 0.0136610183308621    | 57427005              | 0.70299346876071     |     |   |
| 1.34304586404819e-195 | 1.12183830996966e-194 | 100                  | 100 |   |
| E2F7-regulon          | Activated             |                      |     |   |
| 0.0302316933268387    | -0.00035711397848185  | 40435057.5           |     |   |
| 0.494986310560054     | 0.461179530057777     | 0.478010899767915    |     |   |
| 100                   | 100                   |                      |     |   |
| E2F8-regulon          | Activated             |                      |     |   |
| 0.0695306705002889    | -0.00549329411434434  | 35441722             |     |   |
| 0.43386032560174      | 2.45023348575551e-22  | 4.90046697151102e-22 | 100 |   |
| 100                   |                       |                      |     |   |
| EGR1-regulon          | Activated             | 0.0511347992905428   |     |   |
| 0.00383031852564597   | 49997166.5            | 0.612040998934939    |     |   |
| 6.26380781743759e-61  | 1.89246959590668e-60  | 100                  | 100 |   |
| EGR2-regulon          | Activated             | 0.0632183228894073   |     |   |
| 0.0179117364758025    | 61623846.5            | 0.75436916150185     |     |   |
| 6.37579262914455e-306 | 9.05362553338526e-305 | 100                  |     |   |
| 99.9954020874523      |                       |                      |     |   |
| EGR3-regulon          | Activated             | 0.0593242589395023   |     |   |
| 0.0186239136132887    | 63618907              | 0.778791721955463    | 0   | 0 |
| 100                   | 99.9954020874523      |                      |     |   |
| ELF1-regulon          | Activated             |                      |     |   |
| 0.691134449677632     | -0.0165971033328927   | 30793202             |     |   |
| 0.37695540431247      | 4.18626726071662e-73  | 1.38244174656223e-72 | 100 |   |
| 100                   |                       |                      |     |   |
| ELF2-regulon          | Activated             |                      |     |   |
| 0.0316981619578316    | -0.000999256825570102 | 40339064.5           |     |   |
| 0.493811210934943     | 0.363022442551117     | 0.381845828461175    |     |   |
| 99.8935037273695      | 99.519518138765       |                      |     |   |
| ELF4-regulon          | Activated             |                      |     |   |
| 0.0175355866101296    | -0.000950869407638989 | 38988456.5           |     |   |
| 0.477277724592481     | 0.000838678948570836  | 0.00105391513891202  |     |   |
| 98.2960596379127      | 98.3378546140052      |                      |     |   |
| ELK1-regulon          | Activated             |                      |     |   |
| 0.065378644018588     | -0.000705527333793948 | 39574255.5           |     |   |
| 0.484448791079521     | 0.0222718283585051    | 0.0259229477615387   |     |   |
| 100                   | 100                   |                      |     |   |
| ELK3-regulon          | Activated             |                      |     |   |
| 0.0574172019745134    | -0.0078115549904933   | 30329679             |     |   |
| 0.371281181155257     | 7.96135365850284e-80  |                      |     |   |
| 2.89874928078821e-79  | 100                   | 100                  |     |   |
| ELK4-regulon          | Activated             | 0.0504158886906491   |     |   |
| 0.00565281116247896   | 46125137              | 0.564641496743439    |     |   |
| 2.07672510000595e-21  | 3.98506708379519e-21  | 97.6038338658147     |     |   |
| 96.6918019219274      |                       |                      |     |   |
| ESRRA-regulon         | Activated             | 0.100648533006368    |     |   |
| 0.00929761263421881   | 53993654              | 0.660964055439171    |     |   |
| 9.68915997676309e-124 | 4.43826037645277e-123 | 100                  | 100 |   |

ETS1-regulon Activated  
0.217706609122993 -0.0263217902565514 21922787  
0.268368097518444 4.81021531691578e-254 5.692088125017e-253  
100 100  
ETV2-regulon Activated  
0.0284306898171057 -0.00017873327595111 40743639.5  
0.498763821342256 0.855824943688811 0.855824943688811  
100 100  
ETV3-regulon Activated 0.0143041216496818  
0.00299919534781349 47802535.5 0.585175393470406  
4.33907071934158e-36 9.78012765311911e-36 90.7348242811502  
84.0728309347556  
ETV5-regulon Activated  
0.0330524360826381 -0.000428959675870526 39961317  
0.489187009736557 0.111996921779761 0.125224904667135  
100 100  
ETV6-regulon Activated  
0.456820152625032 -0.00287367681333139 37218795.5  
0.455614395207281 6.85713359691804e-11  
1.11921031122111e-10 100 100  
ETV7-regulon Activated  
0.0546225331907406 -0.00986169747093458 26222114  
0.320998367912427 1.49419476610115e-152  
8.48702627145453e-152 100 100  
FLI1-regulon Activated  
0.127386255722948 -0.0172595915067291 24762522  
0.303130752440309 4.25489418773373e-184  
3.02097487329095e-183 100 100  
FOS-regulon Activated  
0.0834198513787681 -0.0029810515740029 37568395  
0.45989402227789 3.75285363534454e-09 5.73016361525725e-09 100  
100  
FOSB-regulon Activated 0.0431168168461675  
0.00171428492976881 43166727 0.5284260801826  
2.94037639839194e-05 4.01474469780438e-05 99.8935037273695  
99.2988183364752  
FOSL1-regulon Activated 0.0800514098839791  
0.0200891430090245 61688154.5 0.755156388765209  
8.34811266481193e-308 1.31714666489255e-306 100 100  
FOX01-regulon Activated  
0.0151194768139147 -0.00164561625059504 38988922  
0.477283423017111 0.000406712523270511  
0.000529845672517547 48.2428115015974 52.5196560761414  
FOX03-regulon Activated  
0.0176141979664484 -0.00222166387037508 39696635  
0.485946901406016 0.0249902734261344 0.0288505595651307  
45.2076677316294 46.8274403420847  
GABPA-regulon Activated 0.027026844139647  
0.00160535895529126 45301525 0.554559239157606  
1.06557809999751e-15 1.89140112749557e-15 100 100

|                       |           |                       |                      |     |
|-----------------------|-----------|-----------------------|----------------------|-----|
| GTF2B-regulon         | Activated | 0.0818986744085045    |                      |     |
| 0.00296438225071007   |           | 44450992.5            | 0.544147433902069    |     |
| 8.65553533715009e-11  |           | 1.39668865667649e-10  | 100                  | 100 |
| HINFP-regulon         | Activated | 0.0169572952200816    |                      |     |
| 0.000758126076717047  |           | 41616402.5            | 0.509447761568218    |     |
| 0.154310578456234     |           | 0.16726795527317      | 64.0575079872204     |     |
| 63.1983079681824      |           |                       |                      |     |
| HIVEP3-regulon        | Activated | 0.097560826928012     |                      |     |
| 0.0207308582457828    |           | 54176618              | 0.663203811752744    |     |
| 3.75285535115237e-127 |           | 1.77635153287879e-126 | 99.7337593184239     |     |
| 99.6919398593039      |           |                       |                      |     |
| H0XB2-regulon         | Activated | 0.037715959250703     |                      |     |
| 0.000639710766900267  |           | 42198396.5            | 0.516572249095609    |     |
| 0.014645262593813     |           | 0.0171870023828219    | 85.7827476038339     |     |
| 83.6406271552715      |           |                       |                      |     |
| IKZF1-regulon         | Activated |                       |                      |     |
| 0.142111937320416     |           | -0.00182784574091008  | 37055612.5           |     |
| 0.453616788276312     |           | 9.27316803507534e-12  |                      |     |
| 1.53115100114035e-11  |           | 100                   | 100                  |     |
| IRF1-regulon          | Activated |                       |                      |     |
| 0.1331898512155       |           | -0.00234984692778456  | 39333575.5           |     |
| 0.481502503560934     |           | 0.0065530719059396    | 0.0078859000901985   |     |
| 100                   | 100       |                       |                      |     |
| IRF2-regulon          | Activated | 0.0872564206242086    |                      |     |
| 0.00233253711307431   |           | 43983402.5            | 0.538423424508617    |     |
| 1.62860117098913e-08  |           | 2.46022730085592e-08  | 100                  | 100 |
| IRF3-regulon          | Activated |                       |                      |     |
| 0.138668363575549     |           | -0.00707080844919553  | 29946738.5           |     |
| 0.3665934097762       |           | 1.32227290055223e-85  | 5.07466896968695e-85 | 100 |
| 100                   |           |                       |                      |     |
| IRF4-regulon          | Activated | 0.0630460032045203    |                      |     |
| 0.0048337083303709    |           | 49721487.5            | 0.608666270678181    |     |
| 2.0136903167632e-57   |           | 5.83559234653826e-57  | 100                  |     |
| 99.9954020874523      |           |                       |                      |     |
| IRF5-regulon          | Activated | 0.069281976452826     |                      |     |
| 0.0231972987076649    |           | 54265152              | 0.664287601927128    |     |
| 9.03515695987619e-130 |           | 4.58211531536578e-129 | 94.8349307774228     |     |
| 79.8588440847855      |           |                       |                      |     |
| IRF7-regulon          | Activated |                       |                      |     |
| 0.0997826357949905    |           | -0.00839970224588014  | 30333702             |     |
| 0.371330428764893     |           | 9.13305686334821e-80  |                      |     |
| 3.24223518648862e-79  |           | 100                   | 100                  |     |
| IRF8-regulon          | Activated |                       |                      |     |
| 0.074539996242139     |           | -0.0075452057154005   | 32041447.5           |     |
| 0.392235818708275     |           | 1.67285775297316e-56  |                      |     |
| 4.75091601844377e-56  |           | 100                   | 100                  |     |
| IRF9-regulon          | Activated |                       |                      |     |
| 0.0337073533469014    |           | -0.000217885526767464 | 41083582.5           |     |
| 0.502925238235771     |           | 0.667233767212025     | 0.676765678172196    |     |
| 100                   | 100       |                       |                      |     |

|                      |           |                      |                   |     |
|----------------------|-----------|----------------------|-------------------|-----|
| JUN-regulon          | Activated | 0.092549856731376    |                   |     |
| 0.00432872873097362  |           | 46159039             | 0.565056508541075 |     |
| 1.1557288606467e-21  |           | 2.279354141831e-21   | 100               | 100 |
| JUNB-regulon         | Activated | 0.163841686637132    |                   |     |
| 0.0042344492168018   |           | 45015028             | 0.551052082205584 |     |
| 6.2097519623585e-14  |           | 1.08862318352458e-13 | 100               | 100 |
| JUND-regulon         | Activated | 0.0421441255525095   |                   |     |
| 0.00384559753950761  |           | 48425051.5           | 0.592795931616162 |     |
| 2.3460037603949e-42  |           | 5.74366437889785e-42 | 100               | 100 |
| KLF11-regulon        | Activated |                      |                   |     |
| 0.0188775905533662   |           | -0.00319096336320084 | 38996454          |     |
| 0.477375626098339    |           | 0.000188577282720957 |                   |     |
| 0.000250261440620336 |           | 37.5399361022364     | 41.0018851441446  |     |
| KLF12-regulon        | Activated |                      |                   |     |
| 0.0414917213917226   |           | -0.00579786259406592 | 35042032          |     |
| 0.428967514988877    |           | 1.62305648015668e-25 |                   |     |
| 3.38932382620954e-25 |           | 98.2960596379127     | 98.6160283231413  |     |
| KLF13-regulon        | Activated |                      |                   |     |
| 0.0622839857137959   |           | -0.00418116091186255 | 35163487          |     |
| 0.430454308035951    |           | 1.58449724696965e-24 |                   |     |
| 3.26084940680711e-24 |           | 100                  | 100               |     |
| KLF2-regulon         | Activated |                      |                   |     |
| 0.0989998299982755   |           | -0.0102737417520557  | 30382247.5        |     |
| 0.371924699168473    |           | 4.76812568488204e-79 |                   |     |
| 1.65139962744695e-78 |           | 100                  | 100               |     |
| KLF3-regulon         | Activated |                      |                   |     |
| 0.0651017011280778   |           | -0.0072266074732425  | 37246249          |     |
| 0.455950467603789    |           | 9.52185597383298e-11 |                   |     |
| 1.51921746998234e-10 |           | 99.8935037273695     | 99.8620626235689  |     |
| KLF4-regulon         | Activated | 0.0162112248397282   |                   |     |
| 0.000324879162001496 |           | 41376268             | 0.506508151795358 |     |
| 0.306103959985708    |           | 0.324378823268437    | 50.4259850905218  |     |
| 49.7861970665318     |           |                      |                   |     |
| KLF6-regulon         | Activated | 0.0714591005028526   |                   |     |
| 0.00216899274558612  |           | 42574702.5           | 0.521178804151988 |     |
| 0.0018529786615933   |           | 0.00226830146505387  | 100               | 100 |
| KLF7-regulon         | Activated | 0.0495598808813143   |                   |     |
| 0.0037148931424759   |           | 44924335.5           | 0.549941868723868 |     |
| 2.12865702931238e-13 |           | 3.64179877304046e-13 | 99.5740149094782  |     |
| 97.4688491424893     |           |                      |                   |     |
| KLF8-regulon         | Activated |                      |                   |     |
| 0.0214028467489597   |           | -0.00386378960554287 | 37999648          |     |
| 0.465173211787833    |           | 2.63733687715361e-07 |                   |     |
| 3.86084367583312e-07 |           | 76.6773162939297     | 77.6771345809003  |     |
| MAFB-regulon         | Activated | 0.0568119828119019   |                   |     |
| 0.00107350723337552  |           | 42919975.5           | 0.525405468313552 |     |
| 0.000188410400405463 |           | 0.000250261440620336 | 100               |     |
| 99.9977010437262     |           |                      |                   |     |
| MAFF-regulon         | Activated |                      |                   |     |
| 0.0118473349202659   |           | -0.00056290302572801 | 40738139          |     |

|                      |                       |                     |     |   |
|----------------------|-----------------------|---------------------|-----|---|
| 0.498696486896121    | 0.81002603725495      | 0.815770902767396   |     |   |
| 28.4877529286475     | 28.5484390086901      |                     |     |   |
| MAFG-regulon         | Activated             | 0.0383591266222019  |     |   |
| 0.0135109590106561   | 49646538              | 0.607748775346727   |     |   |
| 1.15894879954993e-60 | 3.42855686533521e-60  | 71.2460063897764    |     |   |
| 58.0555427835763     |                       |                     |     |   |
| MAX-regulon          | Activated             |                     |     |   |
| 0.197449272652884    | -0.000230476152899478 | 39094252            |     |   |
| 0.478572821655688    | 0.001636377214428     | 0.00203829442498926 |     |   |
| 100                  | 100                   |                     |     |   |
| MAZ-regulon          | Activated             |                     |     |   |
| 0.132190123818292    | -0.00429129536019204  | 36187865.5          |     |   |
| 0.442994251483096    | 5.354059251272e-17    |                     |     |   |
| 9.62375207190662e-17 | 100                   | 100                 |     |   |
| MEF2A-regulon        | Activated             |                     |     |   |
| 0.0387789075703292   | -0.00206069473109018  | 37489418.5          |     |   |
| 0.458927230370745    | 1.57169011024603e-09  |                     |     |   |
| 2.42586951798843e-09 | 100                   | 99.9977010437262    |     |   |
| MLX-regulon          | Activated             |                     |     |   |
| 0.0488271449369439   | -0.00427525503674941  | 35730488            |     |   |
| 0.437395258548359    | 3.52726173236845e-20  |                     |     |   |
| 6.50482033761454e-20 | 100                   | 99.9885052186307    |     |   |
| MXD4-regulon         | Activated             |                     |     |   |
| 0.0674454845520272   | -0.0257910734965062   | 36877889.5          |     |   |
| 0.451441189736069    | 9.17081153215123e-13  |                     |     |   |
| 1.55030385424461e-12 | 86.4217252396166      | 88.6983309577452    |     |   |
| MXI1-regulon         | Activated             | 0.072320843473168   |     |   |
| 0.00739745416385036  | 48607743.5            | 0.595032358238007   |     |   |
| 2.45229196145457e-44 | 6.21831175940267e-44  | 100                 | 100 |   |
| MYBL1-regulon        | Activated             |                     |     |   |
| 0.017466725230504    | -0.012959870564486    | 32682346            |     |   |
| 0.400081386479718    | 3.33781986627958e-49  |                     |     |   |
| 8.77723001873519e-49 | 72.8966986155485      | 80.3692123775806    |     |   |
| MYC-regulon          | Activated             | 0.356776915202617   |     |   |
| 0.0437039542867505   | 62201929              | 0.761445766348382   | 0   | 0 |
| 100                  | 100                   |                     |     |   |
| NFATC1-regulon       | Activated             | 0.0875586073907065  |     |   |
| 0.0386399780101956   | 62788936.5            | 0.768631626704735   |     | 0 |
| 0                    | 99.2012779552716      | 94.6388339693779    |     |   |
| NFE2L1-regulon       | Activated             | 0.228984307360897   |     |   |
| 0.048316880567486    | 55997142              | 0.685489781249536   |     |   |
| 1.1624505558319e-163 | 7.17686864904915e-163 | 99.9467518636848    |     |   |
| 99.9356292243322     |                       |                     |     |   |
| NFE2L2-regulon       | Activated             | 0.130452463586805   |     |   |
| 0.0204169415202104   | 61877004              | 0.757468192507694   | 0   | 0 |
| 100                  | 100                   |                     |     |   |
| NFKB1-regulon        | Activated             | 0.102565322368217   |     |   |
| 0.0478780806240203   | 69885765.5            | 0.855507556172267   |     | 0 |
| 0                    | 100                   | 99.9287323555106    |     |   |
| NFKB2-regulon        | Activated             | 0.109374159000838   |     |   |

|                      |                       |                     |     |   |
|----------------------|-----------------------|---------------------|-----|---|
| 0.037551739334129    | 71229722              | 0.871959618086318   | 0   | 0 |
| 100                  | 100                   |                     |     |   |
| NFYA-regulon         | Activated             | 0.0241415723205907  |     |   |
| 0.00333102926393507  | 47908720.5            | 0.586475258603201   |     |   |
| 5.20015599385355e-37 | 1.21052811660197e-36  | 99.7337593184239    |     |   |
| 98.9861602832314     |                       |                     |     |   |
| NFYB-regulon         | Activated             |                     |     |   |
| 0.103354367973859    | -0.00549808064866812  | 38898668            |     |   |
| 0.476178577439155    | 0.000463086371472151  |                     |     |   |
| 0.000597802406809504 | 100                   | 100                 |     |   |
| NFYC-regulon         | Activated             |                     |     |   |
| 0.0791995786927037   | -0.00452232799092103  | 34318241            |     |   |
| 0.420107217542618    | 7.71187201632284e-32  |                     |     |   |
| 1.65922094896643e-31 | 100                   | 100                 |     |   |
| NR1H3-regulon        | Activated             |                     |     |   |
| 0.00829763936265615  | -0.000246970386209914 | 40399665            |     |   |
| 0.49455305278624     | 0.270265403849575     | 0.288554040200298   |     |   |
| 20.9797657082002     | 22.1527426548347      |                     |     |   |
| NR2C2-regulon        | Activated             | 0.0229344795002537  |     |   |
| 0.00119788866167183  | 42828956              | 0.524291251856854   |     |   |
| 0.000324009107756254 | 0.000426011975012853  | 79.5527156549521    |     |   |
| 75.8241758241758     |                       |                     |     |   |
| NR3C1-regulon        | Activated             |                     |     |   |
| 0.223307094074902    | -0.00226420093275928  | 35690876            |     |   |
| 0.436910347707466    | 1.81236130404655e-20  | 3.3862540154554e-20 |     |   |
| 100                  | 100                   |                     |     |   |
| NRF1-regulon         | Activated             |                     |     |   |
| 0.0265691230558906   | -0.000166952660188548 | 41658386.5          |     |   |
| 0.509961709279621    | 0.143150004599075     | 0.157575974054796   |     |   |
| 100                  | 99.9655156558922      |                     |     |   |
| PAX5-regulon         | Activated             |                     |     |   |
| 0.092749227632403    | -0.00784305603677896  | 30518569.5          |     |   |
| 0.373593486799804    | 4.74419708124693e-77  |                     |     |   |
| 1.60399044175492e-76 | 100                   | 100                 |     |   |
| POU2F1-regulon       | Activated             | 0.00572140382326439 |     |   |
| 0.000877750880915879 | 42398274              | 0.519019052251236   |     |   |
| 3.45096188746981e-05 | 4.66701512400679e-05  | 21.7784877529286    |     |   |
| 18.1985378638098     |                       |                     |     |   |
| POU6F1-regulon       | Activated             |                     |     |   |
| 0.0249839670777476   | -0.00627799334762588  | 37131509.5          |     |   |
| 0.454545882442002    | 8.84127831829937e-12  |                     |     |   |
| 1.47701355435119e-11 | 60.0638977635783      | 65.5823256241666    |     |   |
| REL-regulon          | Activated             | 0.286621770018938   |     |   |
| 0.0238989043227965   | 63122215.5            | 0.772711466150917   |     | 0 |
| 0                    | 100                   | 100                 |     |   |
| RELA-regulon         | Activated             | 0.0961540178191518  |     |   |
| 0.00426612028270307  | 49246519              | 0.602851937275855   |     |   |
| 1.24980713585049e-51 | 3.34853987341073e-51  | 100                 | 100 |   |
| RELB-regulon         | Activated             | 0.115670526351618   |     |   |
| 0.0109396108759855   | 57228748.5            | 0.700566509098799   |     |   |



|                       |                       |                     |     |
|-----------------------|-----------------------|---------------------|-----|
| 5.34283519924145e-191 | 4.21490332384603e-190 | 100                 | 100 |
| REST-regulon          | Activated             |                     |     |
| 0.215318331494598     | -0.00344262217306118  | 33895730.5          |     |
| 0.414935049466243     | 7.21063286472429e-36  | 1.5998591668607e-35 |     |
| 100                   | 100                   |                     |     |
| RFX5-regulon          | Activated             |                     |     |
| 0.0599030366584162    | -0.00568054133414616  | 35166291.5          |     |
| 0.430488639361138     | 1.669155081208e-24    |                     |     |
| 3.38600030759337e-24  | 100                   | 100                 |     |
| RXRA-regulon          | Activated             | 0.0202799330594858  |     |
| 0.00599803820377144   | 48384120.5            | 0.592294874218692   |     |
| 7.70292510079661e-44  | 1.91897432335635e-43  | 75.3993610223642    |     |
| 63.7822428617408      |                       |                     |     |
| SETDB1-regulon        | Activated             |                     |     |
| 0.0587749659025093    | -0.000983255520312878 | 40049643            |     |
| 0.49026825367609      | 0.152588000435805     | 0.166673046629879   |     |
| 92.7582534611289      | 95.1515012184468      |                     |     |
| SOX5-regulon          | Activated             | 0.00920346994709279 |     |
| 0.00146061776918862   | 41860037.5            | 0.512430222759804   |     |
| 0.0124484923216702    | 0.0147307159139765    | 24.6006389776358    |     |
| 22.4033288886845      |                       |                     |     |
| SP1-regulon           | Activated             | 0.0150981130492121  |     |
| 0.00219508858749111   | 43847509              | 0.536759882365909   |     |
| 2.30830110969578e-08  | 3.45030271133474e-08  | 64.2172523961661    |     |
| 59.6326267874385      |                       |                     |     |
| SP2-regulon           | Activated             | 0.0284566244660685  |     |
| 0.000225813264241703  | 41631761.5            | 0.509635778977218   |     |
| 0.156700587028322     | 0.168571843621377     | 100                 | 100 |
| SP3-regulon           | Activated             |                     |     |
| 0.0276009595719513    | -0.000697821851121497 | 38921855            |     |
| 0.476462421417439     | 0.000541123050635782  |                     |     |
| 0.000692247506218749  | 100                   | 100                 |     |
| SP4-regulon           | Activated             | 0.00935284615438201 |     |
| 0.000745788160713887  | 41520204              | 0.508270146312041   |     |
| 0.129349200721127     | 0.14349676955         | 30.3514376996805    |     |
| 28.9576532254357      |                       |                     |     |
| SPI1-regulon          | Activated             |                     |     |
| 0.396682789280343     | -0.0228039889039222   | 22975592            |     |
| 0.281256024354932     | 8.61838801098459e-227 |                     |     |
| 8.74150783971294e-226 | 100                   | 100                 |     |
| SPIB-regulon          | Activated             | 0.566015606611142   |     |
| 0.00163192798713641   | 42333968              | 0.518231849470905   |     |
| 0.00736887438309282   | 0.00879311060839647   | 100                 | 100 |
| SREBF1-regulon        | Activated             | 0.0499320103889161  |     |
| 0.00939079185702722   | 48920537.5            | 0.598861430275937   |     |
| 7.73456489937214e-48  | 1.99692402856517e-47  | 97.8168264110756    |     |
| 96.8550278173709      |                       |                     |     |
| SREBF2-regulon        | Activated             |                     |     |
| 0.0952788187917446    | -0.00386372520912667  | 33582095.5          |     |
| 0.411095682315287     | 5.07885774701315e-39  |                     |     |

|                       |                       |                   |                     |
|-----------------------|-----------------------|-------------------|---------------------|
| 1.22236915267096e-38  | 100                   | 100               |                     |
| SRF-regulon           | Activated             |                   | 0.0244925949758523  |
| 0.0038841751855187    | 48028743.5            |                   | 0.58794452180265    |
| 3.20879993981574e-38  | 7.59415985756392e-38  |                   | 99.1480298189563    |
| 97.8826612717826      |                       |                   |                     |
| STAT1-regulon         | Activated             |                   |                     |
| 0.0784054350529892    | -0.00142192514545501  |                   | 38130728            |
| 0.466777829404322     | 1.04505484154613e-06  |                   | 1.4839778749955e-06 |
|                       | 100                   | 100               |                     |
| STAT2-regulon         | Activated             |                   |                     |
| 0.0631996106838971    | -0.00316576720656135  |                   | 37798822.5          |
| 0.462714803677214     | 4.24992181000303e-08  |                   |                     |
| 6.28634267729615e-08  | 100                   | 99.9609177433445  |                     |
| STAT5A-regulon        | Activated             |                   | 0.0834972757265512  |
| 0.0124027671166473    | 56959446              | 0.697269838854183 |                     |
| 7.71524937039817e-185 | 5.76613373998179e-184 | 100               | 100                 |
| TBP-regulon           | Activated             |                   |                     |
| 0.0182560738695231    | -0.00275939592847584  |                   | 39222949.5          |
| 0.480148273865774     | 0.00180372483170516   |                   | 0.00222720805306202 |
|                       | 46.9116080937167      | 50.0137937376431  |                     |
| TCF12-regulon         | Activated             |                   |                     |
| 0.00878763620453667   | -0.000267133086166773 |                   | 40585895.5          |
| 0.496832796004331     | 0.541674420277284     |                   | 0.553365235103412   |
|                       | 24.6006389776358      | 25.2471377994391  |                     |
| TFDP1-regulon         | Activated             |                   |                     |
| 0.522509943267325     | -0.00589743940327492  |                   | 39728290            |
| 0.486334406522357     | 0.0445844723722771    |                   | 0.0510564119101883  |
|                       | 100                   | 100               |                     |
| TFDP2-regulon         | Activated             |                   |                     |
| 0.0244901528779202    | -0.00274667907039674  |                   | 35653546            |
| 0.436453372000847     | 9.63189093188567e-21  |                   |                     |
| 1.82363801643702e-20  | 100                   | 99.9954020874523  |                     |
| TFEC-regulon          | Activated             |                   | 0.101429485180837   |
| 0.0103148456474631    | 50727131              | 0.620976869366058 |                     |
| 9.90997156584515e-71  | 3.19821809625002e-70  | 100               | 100                 |
| THAP1-regulon         | Activated             |                   | 0.0394547425780819  |
| 0.00238848291936467   | 47405312.5            | 0.580312782671853 |                     |
| 3.70914263353272e-32  | 8.1030500609484e-32   | 100               | 100                 |
| THAP11-regulon        | Activated             |                   |                     |
| 0.176887856787648     | -0.00165849410793933  |                   | 37271165.5          |
| 0.456255483280026     | 1.28005144132691e-10  |                   |                     |
| 2.01963671853801e-10  | 100                   | 100               |                     |
| TP53-regulon          | Activated             |                   | 0.105274722718269   |
| 0.00721671235640681   | 50145729.5            | 0.613859634935537 |                     |
| 7.2893592240268e-63   | 2.25019349959088e-62  | 100               | 100                 |
| USF2-regulon          | Activated             |                   |                     |
| 0.118467941708074     | -0.00711263782483419  |                   | 28271648            |
| 0.346087766462865     | 2.64112303405781e-113 |                   |                     |
| 1.10305726716532e-112 | 100                   | 100               |                     |
| XBP1-regulon          | Activated             |                   |                     |

|                       |                       |                     |   |   |
|-----------------------|-----------------------|---------------------|---|---|
| 0.189259607059289     | -0.00629061240878687  | 38207855.5          |   |   |
| 0.467721986752626     | 2.09344416994875e-06  |                     |   |   |
| 2.88610749643419e-06  | 100 100               |                     |   |   |
| YBX1-regulon          | Activated             | 0.0957192218667629  |   |   |
| 0.000558578035462123  | 43656974.5            | 0.53442745167283    |   |   |
| 4.19014265598192e-07  | 6.07143119540238e-07  | 100 100             |   |   |
| YY1-regulon           | Activated             |                     |   |   |
| 0.637217763076378     | -0.00235086562703679  | 39884439            |   |   |
| 0.488245906645923     | 0.0840593306054255    | 0.0947335313172256  |   |   |
| 100 100               |                       |                     |   |   |
| YY2-regulon           | Activated             | 0.0568571862592235  |   |   |
| 0.00610792098271007   | 44933375.5            | 0.550052532007763   |   |   |
| 1.84193021045367e-13  | 3.18968402298075e-13  | 93.1309904153355    |   |   |
| 90.4179502505862      |                       |                     |   |   |
| ZBTB33-regulon        | Activated             |                     |   |   |
| 0.359546250907185     | -0.00655088783544988  | 34704971            |   |   |
| 0.424841378137861     | 2.27330161498174e-28  |                     |   |   |
| 4.81804222876727e-28  | 100 100               |                     |   |   |
| ZNF143-regulon        | Activated             | 0.0251831686475474  |   |   |
| 0.00193241048383334   | 45892028              | 0.561787889725115   |   |   |
| 1.07069890414353e-19  | 1.94922108190232e-19  | 100                 |   |   |
| 99.9931031311784      |                       |                     |   |   |
| ZNF274-regulon        | Activated             | 0.0671588580662753  |   |   |
| 0.00189578930021538   | 44395599.5            | 0.543469339733393   |   |   |
| 1.66889039456349e-10  | 2.60420259371446e-10  | 100 100             |   |   |
| ZNF76-regulon         | Activated             | 0.0153758829808857  |   |   |
| 0.000854126506457418  | 43581646              | 0.533505316807682   |   |   |
| 8.45432670245764e-07  | 1.21264079974645e-06  | 99.6272630457934    |   |   |
| 99.4528484068233      |                       |                     |   |   |
| ATF1-regulon          | Activated Chemokine   | 0.134621820018288   |   |   |
| 0.0290943484519726    | 42752092              | 0.885654670828108   | 0 | 0 |
| 100 100               |                       |                     |   |   |
| ATF3-regulon          | Activated Chemokine   | 0.0855995664622852  |   |   |
| 0.0354288396067979    | 44198787.5            | 0.915624493751416   |   | 0 |
| 0 100 100             |                       |                     |   |   |
| ATF4-regulon          | Activated Chemokine   | 0.143052994488331   |   |   |
| 0.0351456023695265    | 41874382              | 0.867471982571998   | 0 | 0 |
| 100 100               |                       |                     |   |   |
| ATF5-regulon          | Activated Chemokine   | 0.141985315860068   |   |   |
| 0.024131550584132     | 34141568.5            | 0.707278596130987   |   |   |
| 2.71863076396726e-121 | 5.36174400671321e-121 | 100                 |   |   |
| 99.9977419500519      |                       |                     |   |   |
| ATF6-regulon          | Activated Chemokine   |                     |   |   |
| 0.135042948327873     | -0.00140474119571918  | 28036517.5          |   |   |
| 0.580806026466003     | 6.86040605028125e-20  | 9.2778824679994e-20 |   |   |
| 100 100               |                       |                     |   |   |
| ATF6B-regulon         | Activated Chemokine   |                     |   |   |
| 0.0542706701222256    | -0.00310031555126004  | 21018226.609375     |   |   |
| 0.435414729391876     | 2.92761204063209e-13  |                     |   |   |
| 3.64667464710313e-13  | 100 99.9187102018697  |                     |   |   |

|                       |                       |                    |     |     |
|-----------------------|-----------------------|--------------------|-----|-----|
| BACH1-regulon         | Activated Chemokine   | 0.0511839040496024 |     |     |
| 0.00809553512340592   | 29660890.5            | 0.614456626175066  |     |     |
| 2.97630662612162e-38  | 4.35706743205433e-38  | 100                |     |     |
| 99.5529061102832      |                       |                    |     |     |
| BATF-regulon          | Activated Chemokine   | 0.112234269792366  |     |     |
| 0.0952284475133916    | 45667750.5            | 0.946055611419849  |     | 0   |
| 0                     | 98.4403669724771      | 50.5667705369643   |     |     |
| BATF3-regulon         | Activated Chemokine   | 0.152870322440903  |     |     |
| 0.071422380882002     | 43890393.5            | 0.90923578681854   |     | 0   |
| 100                   | 100                   |                    |     |     |
| BCL11A-regulon        | Activated Chemokine   |                    |     |     |
| 0.165252519467043     | -0.0402138086137048   | 5796177            |     |     |
| 0.120073919025915     | 0                     | 0                  | 100 | 100 |
| BHLHE40-regulon       | Activated Chemokine   | 0.0766892812503233 |     |     |
| 0.0215559103896964    | 39085385.5            | 0.809694978884126  |     |     |
| 3.109608222725e-268   | 1.05134373244512e-267 | 100                | 100 |     |
| BRF2-regulon          | Activated Chemokine   | 0.0562345718393626 |     |     |
| 0.0149821298993476    | 36090212              | 0.747646801213298  |     |     |
| 2.82423049890515e-172 | 6.91449535938848e-172 | 100                |     |     |
| 99.722259856388       |                       |                    |     |     |
| CEBPB-regulon         | Activated Chemokine   | 0.182183880609407  |     |     |
| 0.0400540173981899    | 43473685.5            | 0.900603241151034  |     | 0   |
| 0                     | 100                   | 100                |     |     |
| CEBPG-regulon         | Activated Chemokine   | 0.115936337635515  |     |     |
| 0.0490539538974721    | 42810005.5            | 0.886854410054413  |     | 0   |
| 0                     | 100                   | 100                |     |     |
| CLOCK-regulon         | Activated Chemokine   | 0.017798935215093  |     |     |
| 0.00225845964044082   | 25752027              | 0.533480396604722  |     |     |
| 5.68441906727381e-05  | 6.16173669887696e-05  | 55.6880733944954   |     |     |
| 50.9799936774601      |                       |                    |     |     |
| CREB1-regulon         | Activated Chemokine   |                    |     |     |
| 0.0306982722466979    | -0.0125749944821716   | 12859424.5         |     |     |
| 0.266396539673109     | 1.62314214755906e-153 |                    |     |     |
| 3.77846204841617e-153 | 100                   | 99.9932258501558   |     |     |
| CREB3-regulon         | Activated Chemokine   | 0.246305964985769  |     |     |
| 0.00666608078664127   | 33214700              | 0.688077537706327  |     |     |
| 3.30634778761677e-100 | 5.94305551698205e-100 | 100                | 100 |     |
| CREB3L2-regulon       | Activated Chemokine   |                    |     |     |
| 0.120834112907937     | -0.0060893656975184   | 21254875           |     |     |
| 0.440317150365825     | 1.54891869498878e-11  |                    |     |     |
| 1.86395300583396e-11  | 100                   | 100                |     |     |
| CREB3L4-regulon       | Activated Chemokine   |                    |     |     |
| 0.00801021209876415   | -0.00316721377002557  | 22648773.5         |     |     |
| 0.469193227756033     | 2.3151398152148e-05   |                    |     |     |
| 2.52884502892694e-05  | 26.1467889908257      | 31.474958226076    |     |     |
| CREB5-regulon         | Activated Chemokine   | 0.0994612340940955 |     |     |
| 0.0617707479489901    | 45254998              | 0.937505008106192  |     | 0   |
| 100                   | 99.6138734588809      |                    |     |     |
| CREM-regulon          | Activated Chemokine   | 0.163232256864617  |     |     |
| 0.0135583918653484    | 36499604              | 0.756127788225575  |     |     |

|                       |                       |                    |     |     |
|-----------------------|-----------------------|--------------------|-----|-----|
| 3.91709115298402e-184 | 1.03004989578469e-183 | 100                | 100 |     |
| CTCF-regulon          | Activated Chemokine   |                    |     |     |
| 0.353790167829334     | -0.0174697332210133   | 13714874.5         |     |     |
| 0.284118088554504     | 2.11386110966356e-131 |                    |     |     |
| 4.4801235458541e-131  | 100                   | 100                |     |     |
| CUX1-regulon          | Activated Chemokine   |                    |     |     |
| 0.0548476117736833    | -0.022388253373895    | 6307072            |     |     |
| 0.130657647725149     | 0                     | 0                  | 100 | 100 |
| DDIT3-regulon         | Activated Chemokine   | 0.115675348151254  |     |     |
| 0.0315244866800791    | 40199849.5            | 0.83278227592376   | 0   | 0   |
| 100                   | 100                   |                    |     |     |
| E2F1-regulon          | Activated Chemokine   | 0.451904967309995  |     |     |
| 0.0145597867055828    | 31845687.5            | 0.659717000050133  |     |     |
| 8.54959220110562e-73  | 1.42828481477294e-72  | 100                | 100 |     |
| E2F2-regulon          | Activated Chemokine   |                    |     |     |
| 0.0465026998457231    | -0.00760087654283702  | 14876598.5         |     |     |
| 0.308184426333088     | 3.7536270038921e-104  |                    |     |     |
| 7.0133557177984e-104  | 100                   | 100                |     |     |
| E2F3-regulon          | Activated Chemokine   | 0.0222341521472386 |     |     |
| 0.00114638775606057   | 26412363.5            | 0.54715996357289   |     |     |
| 9.91100381737485e-08  | 1.15357585415347e-07  | 100                | 100 |     |
| E2F4-regulon          | Activated Chemokine   | 0.496968018570164  |     |     |
| 0.100730187974098     | 43931755              | 0.910092633909613  | 0   | 0   |
| 100                   | 100                   |                    |     |     |
| E2F6-regulon          | Activated Chemokine   | 0.138993177001454  |     |     |
| 0.0682309684766749    | 44765767.5            | 0.927370082371176  |     | 0   |
| 0                     | 100                   | 100                |     |     |
| E2F7-regulon          | Activated Chemokine   |                    |     |     |
| 0.0211948154299558    | -0.0096100599576607   | 10100644           |     |     |
| 0.209245492290106     | 1.11024991367138e-236 |                    |     |     |
| 3.42729321176817e-236 | 100                   | 100                |     |     |
| E2F8-regulon          | Activated Chemokine   | 0.0769434591719516 |     |     |
| 0.00219968819445462   | 30965485              | 0.641482677028009  |     |     |
| 1.6162786744635e-57   | 2.52210518432766e-57  | 100                | 100 |     |
| EGR1-regulon          | Activated Chemokine   | 0.0481931606747768 |     |     |
| 0.00074812359209573   | 24116524.5            | 0.499599237566328  |     |     |
| 0.963885078129431     | 0.963885078129431     | 100                | 100 |     |
| EGR2-regulon          | Activated Chemokine   | 0.077569427192542  |     |     |
| 0.0322973495480173    | 41641208              | 0.862641537263832  | 0   | 0   |
| 100                   | 99.9954839001039      |                    |     |     |
| EGR3-regulon          | Activated Chemokine   | 0.076272964645415  |     |     |
| 0.0356583901111485    | 43626963              | 0.903778546205295  | 0   | 0   |
| 100                   | 99.9954839001039      |                    |     |     |
| ELF1-regulon          | Activated Chemokine   |                    |     |     |
| 0.67342207241756      | -0.0344501113518308   | 10476525.5         |     |     |
| 0.217032273955735     | 2.76027304564098e-224 |                    |     |     |
| 8.16580776002125e-224 | 100                   | 100                |     |     |
| ELF2-regulon          | Activated Chemokine   |                    |     |     |
| 0.019813443978972     | -0.0131587101207465   | 13407405           |     |     |
| 0.277748533614077     | 3.77238087818007e-139 |                    |     |     |

|                       |                       |                     |                    |
|-----------------------|-----------------------|---------------------|--------------------|
| 8.50282674129476e-139 | 98.5321100917431      | 99.5596802601274    |                    |
| ELF4-regulon          | Activated             | Chemokine           |                    |
| 0.00993472525102016   | -0.00872188959319946  | 12390526            |                    |
| 0.256682812759598     | 2.2396253146776e-166  |                     |                    |
| 5.39028465566473e-166 | 92.8440366972477      | 98.4713001851601    |                    |
| ELK1-regulon          | Activated             | Chemokine           | 0.0742363039371977 |
| 0.0083826976584353    | 31856297.5            | 0.659936797389114   |                    |
| 5.45235783349812e-73  | 9.21708109948491e-73  | 100                 | 100                |
| ELK3-regulon          | Activated             | Chemokine           |                    |
| 0.0388667920299352    | -0.0266795470492178   | 6379214             |                    |
| 0.132152145333895     | 0                     | 0                   | 100                |
| ELK4-regulon          | Activated             | Chemokine           | 0.0460516462131142 |
| 0.00108056978017621   | 24852379              | 0.514843239543468   |                    |
| 0.0935257386240356    | 0.0955442797454176    | 97.9816513761468    |                    |
| 96.6987309759292      |                       |                     |                    |
| ESRRA-regulon         | Activated             | Chemokine           | 0.146961996991936  |
| 0.0565855416197526    | 43890031.5            | 0.909228287606786   | 0                  |
| 0                     | 100                   | 100                 |                    |
| ETS1-regulon          | Activated             | Chemokine           |                    |
| 0.192836396862672     | -0.0513357716683338   | 6266805             |                    |
| 0.129823474355803     | 0                     | 0                   | 100                |
| ETV2-regulon          | Activated             | Chemokine           |                    |
| 0.0212480060554418    | -0.00753502231871423  | 13510038.5          |                    |
| 0.279874694800726     | 1.54179294514279e-136 |                     |                    |
| 3.42085309703556e-136 | 100                   | 100                 |                    |
| ETV3-regulon          | Activated             | Chemokine           | 0.0140719072790281 |
| 0.00270789956095395   | 27933956.5            | 0.57868136719331    |                    |
| 5.24918771321079e-19  | 6.96621173155077e-19  | 91.3761467889908    |                    |
| 84.1755859639615      |                       |                     |                    |
| ETV5-regulon          | Activated             | Chemokine           |                    |
| 0.0302136451277632    | -0.00332998840151338  | 18670385            |                    |
| 0.38677671449175      | 1.80604142863881e-37  | 2.6169171721093e-37 | 100                |
| 100                   |                       |                     |                    |
| ETV6-regulon          | Activated             | Chemokine           |                    |
| 0.455647168208499     | -0.00402439901799412  | 19971587.5          |                    |
| 0.413732496487593     | 1.90192317526199e-22  |                     |                    |
| 2.59685664314618e-22  | 100                   | 100                 |                    |
| ETV7-regulon          | Activated             | Chemokine           |                    |
| 0.0429407456715799    | -0.0216555323817945   | 6114326.5           |                    |
| 0.126664721429143     | 0                     | 0                   | 100                |
| FLI1-regulon          | Activated             | Chemokine           |                    |
| 0.100064456465498     | -0.0449467478314987   | 6110084             |                    |
| 0.126576833567632     | 0                     | 0                   | 100                |
| FOS-regulon           | Activated             | Chemokine           |                    |
| 0.0680430694136747    | -0.0186832552006064   | 9965529             |                    |
| 0.206446442576961     | 3.21849934421382e-241 |                     |                    |
| 1.01561534861858e-240 | 100                   | 100                 |                    |
| FOSB-regulon          | Activated             | Chemokine           |                    |
| 0.0315977030165401    | -0.0101188489197058   | 17429972.5          |                    |
| 0.361080261453182     | 1.61614663297453e-55  |                     |                    |

|                       |                       |                      |     |   |
|-----------------------|-----------------------|----------------------|-----|---|
| 2.46766475142348e-55  | 99.2660550458716      | 99.3248430655286     |     |   |
| FOSL1-regulon         | Activated Chemokine   | 0.134073981251242    |     |   |
| 0.0750839032869862    | 46090237              | 0.954807864808685    | 0   | 0 |
| 100                   | 100                   |                      |     |   |
| FOX01-regulon         | Activated Chemokine   |                      |     |   |
| 0.00688204796604814   | -0.0100565096660158   | 17797921.5           |     |   |
| 0.368702713015939     | 1.31041706017838e-55  |                      |     |   |
| 2.02260024505794e-55  | 30.8256880733945      | 52.8722395339385     |     |   |
| FOX03-regulon         | Activated Chemokine   |                      |     |   |
| 0.0121637610604061    | -0.00776671995850038  | 20866989             |     |   |
| 0.432281682823118     | 1.01315560113014e-16  |                      |     |   |
| 1.33211199407852e-16  | 36.5137614678899      | 47.0125999187102     |     |   |
| GABPA-regulon         | Activated Chemokine   |                      |     |   |
| 0.0193512422248321    | -0.00628772543578963  | 14283924             |     |   |
| 0.295906549049195     | 1.18344315672396e-117 |                      |     |   |
| 2.30204011307948e-117 | 100                   | 100                  |     |   |
| GTF2B-regulon         | Activated Chemokine   | 0.0936634903052057   |     |   |
| 0.0149660160156731    | 34470012.5            | 0.71408265995798     |     |   |
| 2.97269244928321e-129 | 6.20768129115023e-129 | 100                  | 100 |   |
| HINFP-regulon         | Activated Chemokine   |                      |     |   |
| 0.0125866293082585    | -0.00373360358419918  | 21670088             |     |   |
| 0.44891872553175      | 3.21181693183963e-09  | 3.76923970513411e-09 |     |   |
| 58.4403669724771      | 63.3518493429075      |                      |     |   |
| HIVEP3-regulon        | Activated Chemokine   | 0.109130141258613    |     |   |
| 0.032216052003803     | 35390939              | 0.733160623586388    |     |   |
| 6.08330572999438e-153 | 1.39327324783742e-152 | 99.8165137614679     |     |   |
| 99.6906471571151      |                       |                      |     |   |
| HOXB2-regulon         | Activated Chemokine   |                      |     |   |
| 0.0282040826185365    | -0.00911766190494869  | 20767082             |     |   |
| 0.430212003959252     | 2.74452557982439e-15  | 3.5110147057213e-15  |     |   |
| 83.1192660550459      | 83.7442984238811      |                      |     |   |
| IKZF1-regulon         | Activated Chemokine   |                      |     |   |
| 0.141443034322317     | -0.00248068862574777  | 20794322             |     |   |
| 0.430776309285723     | 5.23183540683764e-15  |                      |     |   |
| 6.63321989081201e-15  | 100                   | 100                  |     |   |
| IRF1-regulon          | Activated Chemokine   |                      |     |   |
| 0.112431367426499     | -0.0235774421278614   | 9502831.5            |     |   |
| 0.196861175917835     | 4.35924793809482e-257 |                      |     |   |
| 1.43956559816154e-256 | 100                   | 100                  |     |   |
| IRF2-regulon          | Activated Chemokine   |                      |     |   |
| 0.0757924741205907    | -0.0094550724202606   | 16718065             |     |   |
| 0.346332346834815     | 1.59838282901127e-67  |                      |     |   |
| 2.57920865590455e-67  | 100                   | 100                  |     |   |
| IRF3-regulon          | Activated Chemokine   |                      |     |   |
| 0.130260322056068     | -0.0155599809852115   | 11044297             |     |   |
| 0.228794259332686     | 3.37074799208904e-206 |                      |     |   |
| 9.57292429753288e-206 | 100                   | 100                  |     |   |
| IRF4-regulon          | Activated Chemokine   | 0.074382103888998    |     |   |
| 0.0163628132956992    | 37390053.5            | 0.774574388658872    |     |   |
| 2.66637034291918e-211 | 7.72703242233722e-211 | 100                  |     |   |

99.9954839001039  
 IRF5-regulon Activated Chemokine 0.054651638930039  
 0.00779410883240807 27583843.5 0.571428407179853  
 5.47356326358845e-16 7.06587257663237e-16 91.8348623853211  
 80.1991600054193  
 IRF7-regulon Activated Chemokine  
 0.0815278361408023 -0.0269543430745549 7115592.5  
 0.14740700252363 0 0 100 100  
 IRF8-regulon Activated Chemokine  
 0.062171553359975 -0.0200838148044431 9932033  
 0.205752537613104 2.37679925479184e-242  
 7.67057941319185e-242 100 100  
 IRF9-regulon Activated Chemokine  
 0.0255584990193618 -0.00856342859164902 13992806  
 0.28987573267506 1.36741584076887e-124 2.73483168153773e-124 100  
 100  
 JUN-regulon Activated Chemokine  
 0.0772447345513765 -0.0114301174569789 13908517.5  
 0.288129607509487 1.22960187208489e-126  
 2.53048501211674e-126 100 100  
 JUNB-regulon Activated Chemokine  
 0.153156546141079 -0.00678902730245365 19171272.5  
 0.397153127274882 3.25714500037659e-31  
 4.57935237676709e-31 100 100  
 JUND-regulon Activated Chemokine  
 0.0363559394587748 -0.00215347808372406 21245598.5  
 0.440124977885612 1.33351845409116e-11  
 1.61845829470893e-11 100 100  
 KLF11-regulon Activated Chemokine  
 0.013506160190834 -0.00863782117379691 21493541.5  
 0.445261378603713 3.79938019981524e-12  
 33.302752293578 41.0445739059748  
 KLF12-regulon Activated Chemokine  
 0.0243230120290333 -0.0232859771295233 10302796.5  
 0.213433294511447 5.66158431997208e-230  
 1.71052122007667e-229 92.1100917431193 98.7625886284605  
 KLF13-regulon Activated Chemokine  
 0.0519230500186359 -0.0147227104603663 8942224  
 0.185247600355819 5.3884549623111e-277  
 1.91290151162044e-276 100 100  
 KLF2-regulon Activated Chemokine  
 0.0763096570839817 -0.0333395769518565 6767228  
 0.140190264531587 0 0 100 100  
 KLF3-regulon Activated Chemokine  
 0.0431223661829778 -0.029618328012012 11856297  
 0.245615695643041 1.1565978171791e-181  
 2.93280160784701e-181 99.2660550458716 99.8780653028045  
 KLF4-regulon Activated Chemokine  
 0.0118447012767195 -0.00415489724532231 22412851  
 0.464305844371883 1.5973459680094e-05



|                       |                       |                      |                   |
|-----------------------|-----------------------|----------------------|-------------------|
| 1.77205568326043e-05  | 46.2385321100917      | 49.9006458022851     |                   |
| KLF6-regulon          | Activated Chemokine   |                      |                   |
| 0.0489382843852774    | -0.0209447162919114   | 12512833.5           |                   |
| 0.259216541603845     | 5.6959128394163e-163  |                      |                   |
| 1.34803270532852e-162 | 100                   | 100                  |                   |
| KLF7-regulon          | Activated Chemokine   |                      |                   |
| 0.0365306092419973    | -0.00970116533428697  | 18859219.5           |                   |
| 0.390688620298336     | 4.83549160576084e-35  |                      |                   |
| 6.93575563654586e-35  | 98.4403669724771      | 97.5342094567132     |                   |
| KLF8-regulon          | Activated Chemokine   |                      |                   |
| 0.0106093057469204    | -0.0148542391900473   | 15024029             |                   |
| 0.311238604616283     | 4.82701370800994e-102 |                      |                   |
| 8.78764034022323e-102 | 58.6238532110092      | 78.1036896536151     |                   |
| MAFB-regulon          | Activated Chemokine   |                      |                   |
| 0.0502144661104132    | -0.0057054938402517   | 18401291.5           |                   |
| 0.381202158861479     | 4.47431953327875e-41  |                      |                   |
| 6.61826430964148e-41  | 100                   | 99.9977419500519     |                   |
| MAFF-regulon          | Activated Chemokine   |                      |                   |
| 0.00700724941399277   | -0.00551210034199902  | 21966053.5           |                   |
| 0.455049962980411     | 1.86121090341323e-10  |                      |                   |
| 2.22094074188805e-10  | 20.9174311926606      | 28.7336855891252     |                   |
| MAFG-regulon          | Activated Chemokine   | 0.0347960025101      |                   |
| 0.00961973028349333   | 28690546.5            | 0.594354926919974    |                   |
| 1.95584587547489e-28  | 2.6964088768683e-28   | 73.1192660550459     |                   |
| 58.2441403603848      |                       |                      |                   |
| MAX-regulon           | Activated Chemokine   |                      |                   |
| 0.19574306425941      | -0.001974578055393    | 20307576             | 0.420692852588285 |
|                       | 3.23255429453123e-19  | 4.33040292286259e-19 | 100               |
|                       |                       |                      | 100               |
| MAZ-regulon           | Activated Chemokine   | 0.141010152516692    |                   |
| 0.00482217532947141   | 31058573.5            | 0.643411103473792    |                   |
| 4.78360874071561e-59  | 7.54747156868462e-59  | 100                  | 100               |
| MEF2A-regulon         | Activated Chemokine   |                      |                   |
| 0.0235399083255473    | -0.0176381007348638   | 8567505.5            |                   |
| 0.177484911461654     | 1.01876729181299e-290 |                      |                   |
| 3.70935783172935e-290 | 100                   | 99.9977419500519     |                   |
| MLX-regulon           | Activated Chemokine   |                      |                   |
| 0.0488532415779865    | -0.00417244461917029  | 21477827.5           |                   |
| 0.444935846522209     | 4.92738244024689e-10  |                      |                   |
| 5.83073588762548e-10  | 100                   | 99.9887097502597     |                   |
| MXD4-regulon          | Activated Chemokine   |                      |                   |
| 0.0820539718226196    | -0.0103641195086625   | 25442114.5           |                   |
| 0.527060232342982     | 0.00221593295103984   | 0.00236588330111021  |                   |
|                       | 93.1192660550459      | 88.4929774646615     |                   |
| MXI1-regulon          | Activated Chemokine   |                      |                   |
| 0.0540671551949068    | -0.0114371335883849   | 17045360             |                   |
| 0.353112607915107     | 7.44789105258448e-62  |                      |                   |
| 1.18831520164831e-61  | 100                   | 100                  |                   |
| MYBL1-regulon         | Activated Chemokine   |                      |                   |
| 0.0102020302460963    | -0.0201727690337013   | 13991146             |                   |
| 0.289841344024475     | 1.30500032353736e-125 |                      |                   |

|                       |                       |                     |     |     |
|-----------------------|-----------------------|---------------------|-----|-----|
| 2.64728637060436e-125 | 57.9816513761468      | 80.6033509461229    |     |     |
| MYC-regulon           | Activated Chemokine   | 0.465864781854003   |     |     |
| 0.154699129312613     | 45626374.5            | 0.945198463945986   |     | 0   |
| 0                     | 100                   | 100                 |     |     |
| NFATC1-regulon        | Activated Chemokine   | 0.114186113035978   |     |     |
| 0.0652353217641544    | 42212202.5            | 0.87447029048466    | 0   | 0   |
| 100                   | 94.7003567718918      |                     |     |     |
| NFE2L1-regulon        | Activated Chemokine   | 0.319062654513512   |     |     |
| 0.139752579851908     | 42733053.5            | 0.885260268223188   |     | 0   |
| 0                     | 100                   | 99.9345165515061    |     |     |
| NFE2L2-regulon        | Activated Chemokine   | 0.165488461725779   |     |     |
| 0.0559519842342995    | 45474679.5            | 0.94205594204808    | 0   | 0   |
| 100                   | 100                   |                     |     |     |
| NFKB1-regulon         | Activated Chemokine   | 0.114074382798328   |     |     |
| 0.0588184951691351    | 43549901              | 0.902182125608068   | 0   | 0   |
| 100                   | 99.93000045161        |                     |     |     |
| NFKB2-regulon         | Activated Chemokine   | 0.102564440964836   |     |     |
| 0.0299062410683808    | 40159367.5            | 0.831943648602681   |     |     |
| 7.77486287080266e-308 | 2.9838662909567e-307  | 100                 | 100 |     |
| NFYA-regulon          | Activated Chemokine   |                     |     |     |
| 0.0193049450999793    | -0.00168391107437605  | 21980539            |     |     |
| 0.455350045388876     | 4.54095104729324e-07  |                     |     |     |
| 5.15852038972512e-07  | 99.4495412844037      | 99.0064580228515    |     |     |
| NFYB-regulon          | Activated Chemokine   | 0.114681930752429   |     |     |
| 0.00620611427052872   | 33348893.5            | 0.690857497575186   |     |     |
| 3.91665466376821e-103 | 7.22292158772839e-103 | 100                 | 100 |     |
| NFYC-regulon          | Activated Chemokine   |                     |     |     |
| 0.083332565401795     | -0.000207149393428044 | 25520011.5          |     |     |
| 0.528673950845774     | 0.00119649897390842   | 0.00128714283556815 |     |     |
| 100                   | 100                   |                     |     |     |
| NR1H3-regulon         | Activated Chemokine   |                     |     |     |
| 0.00398929922331403   | -0.00465695614917009  | 21878451            |     |     |
| 0.453235184809994     | 3.43978227211362e-13  |                     |     |     |
| 4.24738332730551e-13  | 13.5779816513761      | 22.3140495867769    |     |     |
| NR2C2-regulon         | Activated Chemokine   |                     |     |     |
| 0.0112386675614195    | -0.0108071038597105   | 16533120            |     |     |
| 0.342501016122477     | 8.29429626243763e-72  |                     |     |     |
| 1.36952333635598e-71  | 57.9816513761468      | 76.4214424423068    |     |     |
| NR3C1-regulon         | Activated Chemokine   |                     |     |     |
| 0.202424774802416     | -0.0236202034837524   | 7469512.5           |     |     |
| 0.154738828556833     | 0                     | 0                   | 100 | 100 |
| NRF1-regulon          | Activated Chemokine   |                     |     |     |
| 0.0260733780158601    | -0.000671928685121871 | 24353079            |     |     |
| 0.504499713496965     | 0.611174861411469     | 0.615509434896656   |     |     |
| 100                   | 99.966129250779       |                     |     |     |
| PAX5-regulon          | Activated Chemokine   |                     |     |     |
| 0.0727419638078563    | -0.0282031986359221   | 7274494             |     |     |
| 0.15069881466879      | 0                     | 0                   | 100 | 100 |
| POU2F1-regulon        | Activated Chemokine   |                     |     |     |
| 0.00256230367941107   | -0.00237472158942802  | 22761667            |     |     |

|                       |                       |                    |     |
|-----------------------|-----------------------|--------------------|-----|
| 0.471531935662564     | 1.88606519990096e-06  |                    |     |
| 2.10882880618848e-06  | 13.1192660550459      | 18.4753646750666   |     |
| POU6F1-regulon        | Activated Chemokine   |                    |     |
| 0.0131881011774799    | -0.0182524808229593   | 16393377           |     |
| 0.339606092508785     | 1.68217199272936e-76  |                    |     |
| 2.87793280683818e-76  | 43.2110091743119      | 65.8989296843246   |     |
| REL-regulon           | Activated Chemokine   | 0.321311786284839  |     |
| 0.0590174935264992    | 45772523              | 0.948226084247222  | 0   |
| 100                   | 100                   |                    | 0   |
| RELA-regulon          | Activated Chemokine   |                    |     |
| 0.0855427829805686    | -0.0066821950950308   | 15589593           |     |
| 0.322954859302772     | 5.14723246739847e-89  |                    |     |
| 8.91350012647052e-89  | 100                   | 100                |     |
| RELB-regulon          | Activated Chemokine   | 0.128310526552144  |     |
| 0.0236960629314615    | 41664315.5            | 0.863120233494794  | 0   |
| 0                     | 100                   | 100                |     |
| REST-regulon          | Activated Chemokine   |                    |     |
| 0.202966755668602     | -0.0160369481092035   | 9020858.5          |     |
| 0.186876596948857     | 3.70624473132868e-274 |                    |     |
| 1.28362622402115e-273 | 100                   | 100                |     |
| RFX5-regulon          | Activated Chemokine   |                    |     |
| 0.0536715000941009    | -0.0119643767803608   | 14516167.5         |     |
| 0.300717718068584     | 2.90476860082419e-112 |                    |     |
| 5.57401542320318e-112 | 100                   | 100                |     |
| RXRA-regulon          | Activated Chemokine   | 0.0336073304880645 |     |
| 0.0195467337647753    | 36733383              | 0.760970766746755  |     |
| 4.0201516523832e-200  | 1.11933634242826e-199 | 90.8256880733945   |     |
| 63.6092670369869      |                       |                    |     |
| SETDB1-regulon        | Activated Chemokine   | 0.0658326973100108 |     |
| 0.00626568151840808   | 27648048              | 0.572758471105454  |     |
| 2.01655024936091e-16  | 2.62706546247017e-16  | 97.9816513761468   |     |
| 94.9803549654518      |                       |                    |     |
| SOX5-regulon          | Activated Chemokine   |                    |     |
| 0.00529372671357056   | -0.00257134438062002  | 22525975           |     |
| 0.466649327328992     | 2.54326470328403e-07  |                    |     |
| 2.93612673062059e-07  | 16.1467889908257      | 22.6504990290385   |     |
| SP1-regulon           | Activated Chemokine   | 0.0140827584391982 |     |
| 0.00111568515094381   | 24882842.5            | 0.515474323071843  |     |
| 0.0706110029771499    | 0.072657698715618     | 62.0183486238532   |     |
| 59.7683240753286      |                       |                    |     |
| SP2-regulon           | Activated Chemokine   |                    |     |
| 0.0275217334344335    | -0.000736105994749627 | 23122641.5         |     |
| 0.479009903102726     | 0.01771334402252      | 0.018494815082337  | 100 |
| 100                   |                       |                    |     |
| SP3-regulon           | Activated Chemokine   |                    |     |
| 0.0178497461055524    | -0.0106766227957232   | 8308772.5          |     |
| 0.172124984514749     | 2.17584619727447e-300 |                    |     |
| 8.13079368455198e-300 | 100                   | 100                |     |
| SP4-regulon           | Activated Chemokine   | 0.0095017807040875 |     |
| 0.00088511826631823   | 24972643              | 0.517334635130203  |     |

|                       |                            |                      |
|-----------------------|----------------------------|----------------------|
| 0.0145352988899057    | 0.0152889810545675         | 32.3853211009174     |
| 28.9323939845549      |                            |                      |
| SPI1-regulon          | Activated Chemokine        |                      |
| 0.371020478921496     | -0.0486921578870497        | 7354159              |
| 0.152349159156061     | 0 0                        | 100 100              |
| SPIB-regulon          | Activated Chemokine        | 0.591894424559912    |
| 0.0281186570660672    | 36834152.5                 | 0.763058313207686    |
| 4.04676296218803e-194 | 1.10507757813596e-193      | 100 100              |
| SREBF1-regulon        | Activated Chemokine        | 0.0489114541737106   |
| 0.00817802252124377   | 29183769 0.604572551144831 |                      |
| 3.25519865297483e-32  | 4.62238208722426e-32       | 98.6238532110092     |
| 96.8522783723976      |                            |                      |
| SREBF2-regulon        | Activated Chemokine        |                      |
| 0.0858048457151089    | -0.0135021298259498        | 11493294.5           |
| 0.238095716044211     | 1.94243957485848e-192      |                      |
| 5.20427206848875e-192 | 100 100                    |                      |
| SRF-regulon           | Activated Chemokine        |                      |
| 0.0186942228231885    | -0.0021260236322897        | 22041143             |
| 0.45660552116         | 9.44185286314365e-07       | 1.06408183060825e-06 |
| 98.8990825688073      | 97.91130379804             |                      |
| STAT1-regulon         | Activated Chemokine        |                      |
| 0.0690630312930436    | -0.0109689701708959        | 12108167             |
| 0.250833448307436     | 2.26634034067287e-174      |                      |
| 5.64597067325522e-174 | 100 100                    |                      |
| STAT2-regulon         | Activated Chemokine        |                      |
| 0.0461293524935018    | -0.020599841430664         | 11847569             |
| 0.245434885918759     | 6.42355884235869e-182      |                      |
| 1.65844610111806e-181 | 100 99.9616131508829       |                      |
| STAT5A-regulon        | Activated Chemokine        | 0.107371222731043    |
| 0.036643629664358     | 42548551.5                 | 0.881438114723024    |
| 0                     | 100 100                    | 0                    |
| TBP-regulon           | Activated Chemokine        |                      |
| 0.0179479561725272    | -0.00302599811939958       | 22431571             |
| 0.464693648913422     | 1.9847554239067e-05        |                      |
| 2.18476953639342e-05  | 43.4862385321101           | 50.0429029490132     |
| TCF12-regulon         | Activated Chemokine        |                      |
| 0.00533665187505766   | -0.00379830239616407       | 22475681.5           |
| 0.465607444438506     | 3.50035488627164e-07       |                      |
| 4.00847091814978e-07  | 19.5412844036697           | 25.3601589667163     |
| TFDP1-regulon         | Activated Chemokine        | 0.551086236168037    |
| 0.0234871301878486    | 34569044 0.716134201916069 |                      |
| 1.05303154988824e-131 | 2.26561333460803e-131      | 100 100              |
| TFDP2-regulon         | Activated Chemokine        |                      |
| 0.0210058675661015    | -0.00626784935449581       | 15417833             |
| 0.319396669769932     | 1.49754818149531e-92       |                      |
| 2.62533137990536e-92  | 100 99.9954839001039       |                      |
| TFEC-regulon          | Activated Chemokine        | 0.100454522722095    |
| 0.00913235016586424   | 30667776.5                 | 0.635315331496234    |
| 9.11626594885523e-53  | 1.36264185761836e-52       | 100 100              |
| THAP1-regulon         | Activated Chemokine        | 0.0372521001316256   |

|                       |                       |                    |     |
|-----------------------|-----------------------|--------------------|-----|
| 8.91280850861612e-05  | 24389506.5            | 0.505254347574792  |     |
| 0.552740113994476     | 0.560636401337254     | 100                | 100 |
| THAP11-regulon        | Activated Chemokine   | 0.179495461598913  |     |
| 0.00104280131889944   | 25138243              | 0.520765213766896  |     |
| 0.0189685729210634    | 0.0196608566043139    | 100                | 100 |
| TP53-regulon          | Activated Chemokine   | 0.129760876204049  |     |
| 0.0321771271880439    | 41432494.5            | 0.858317817008461  | 0   |
| 0                     | 100                   | 100                |     |
| USF2-regulon          | Activated Chemokine   |                    |     |
| 0.103402593171441     | -0.0224222276860152   | 6721470            |     |
| 0.139242339306601     | 0                     | 0                  | 100 |
| XBP1-regulon          | Activated Chemokine   |                    |     |
| 0.181137407268426     | -0.0145007902332031   | 14863753           |     |
| 0.307918318254117     | 1.95286056246702e-104 |                    |     |
| 3.69741599827088e-104 | 100                   | 100                |     |
| YBX1-regulon          | Activated Chemokine   | 0.0967403518691899 |     |
| 0.00159490182849339   | 27463305.5            | 0.568931335394166  |     |
| 6.79826530086367e-15  | 8.54295285595258e-15  | 100                | 100 |
| YY1-regulon           | Activated Chemokine   | 0.663217421722516  |     |
| 0.0243305459441425    | 33074946              | 0.685182386216034  |     |
| 3.32351633624377e-97  | 5.8992414968327e-97   | 100                | 100 |
| YY2-regulon           | Activated Chemokine   |                    |     |
| 0.033470990162198     | -0.0179625544685162   | 16557244.5         |     |
| 0.343000780580936     | 1.8497666009142e-70   |                    |     |
| 3.01915927965306e-70  | 82.2018348623853      | 90.7352210630899   |     |
| ZBTB33-regulon        | Activated Chemokine   | 0.365877954652536  |     |
| 5.32193036772433e-05  | 22836055.5            | 0.4730729718879    |     |
| 0.00234747910846377   | 0.00248762711493922   | 100                | 100 |
| ZNF143-regulon        | Activated Chemokine   |                    |     |
| 0.0171032697001461    | -0.00638074116902623  | 13541523.5         |     |
| 0.280526939778844     | 9.64100080584629e-136 |                    |     |
| 2.10618786835411e-135 | 100                   | 99.9932258501558   |     |
| ZNF274-regulon        | Activated Chemokine   |                    |     |
| 0.0600095346133211    | -0.0054632312247772   | 19296146.5         |     |
| 0.399740023873181     | 9.55405520628247e-30  |                    |     |
| 1.33007435224717e-29  | 100                   | 100                |     |
| ZNF76-regulon         | Activated Chemokine   |                    |     |
| 0.0110399926768242    | -0.00360367980082213  | 17480406.5         |     |
| 0.362125054949335     | 1.03128916251632e-54  |                    |     |
| 1.55790490507785e-54  | 98.7155963302752      | 99.478390461997    |     |
| ATF1-regulon          | Activated NME1        | 0.125560304367744  |     |
| 0.021461872969762     | 156920744.5           | 0.853267789968554  | 0   |
| 0                     | 100                   | 100                |     |
| ATF3-regulon          | Activated NME1        | 0.0673125520358079 |     |
| 0.0180837640778633    | 146192473.5           | 0.794932047836297  | 0   |
| 0                     | 100                   | 100                |     |
| ATF4-regulon          | Activated NME1        | 0.132435097715441  |     |
| 0.0262901010976888    | 149416627             | 0.812463613469829  | 0   |
| 0                     | 100                   | 100                |     |
| ATF5-regulon          | Activated NME1        | 0.138915290986944  |     |

|                       |                       |                      |                     |
|-----------------------|-----------------------|----------------------|---------------------|
| 0.0227361205696601    | 126061245.5           | 0.685467053391837    | 0                   |
| 0                     | 100                   | 99.9975536365193     |                     |
| ATF6-regulon          | Activated NME1        |                      |                     |
| 0.13402365912673      | -0.00265336583860609  | 102607122            |                     |
| 0.557933576615001     | 2.22782662866752e-37  |                      |                     |
| 2.82456590420347e-37  | 100                   | 100                  |                     |
| ATF6B-regulon         | Activated NME1        |                      |                     |
| 0.0543039480388969    | -0.00332193056624079  | 82519289.2597656     |                     |
| 0.448704547004338     | 1.13026248128184e-29  |                      |                     |
| 1.33747726951685e-29  | 100                   | 99.9119309146953     |                     |
| BACH1-regulon         | Activated NME1        | 0.0453110009091249   |                     |
| 0.00225138869224373   | 98889241              | 0.537717332329746    |                     |
| 8.95714880993797e-17  | 1.03407734228552e-16  | 99.9333185152256     |                     |
| 99.5229591212662      |                       |                      |                     |
| BATF-regulon          | Activated NME1        | 0.0297817756494759   |                     |
| 0.011642797963409     | 115782260             | 0.629574333352494    |                     |
| 4.16900187846297e-202 | 7.04759841359216e-202 | 70.5712380529006     |                     |
| 49.6416077500795      |                       |                      |                     |
| BATF3-regulon         | Activated NME1        | 0.138082012545245    |                     |
| 0.060962820410377     | 168422975             | 0.915811992328261    | 0                   |
| 0                     | 100                   | 100                  |                     |
| BCL11A-regulon        | Activated NME1        |                      |                     |
| 0.175095202557603     | -0.0326415133289934   | 25948597             |                     |
| 0.141097355136335     | 0                     | 0                    | 100                 |
| BHLHE40-regulon       | Activated NME1        | 0.0635444099144618   |                     |
| 0.0087619777816877    | 117686945.5           | 0.639931197209778    |                     |
| 4.21491545991816e-209 | 7.2110601844383e-209  | 100                  | 100                 |
| BRF2-regulon          | Activated NME1        | 0.0549484006427983   |                     |
| 0.0148038579276171    | 138318147             | 0.752114833378423    | 0                   |
| 0                     | 100                   | 99.6990972918756     |                     |
| CEBPB-regulon         | Activated NME1        | 0.172415111854923    |                     |
| 0.0325504455682356    | 163053385             | 0.886614462027624    | 0                   |
| 0                     | 100                   | 100                  |                     |
| CEBPG-regulon         | Activated NME1        | 0.10003425288193     | 0.0354925851829828  |
| 153276291             | 0.83345081297487      | 0                    | 0                   |
|                       |                       | 100                  | 100                 |
| CLOCK-regulon         | Activated NME1        | 0.0214136809416      | 0.00645939882385069 |
| 107537590.5           | 0.58474335230087      | 5.17213585710454e-88 |                     |
| 6.92871029914004e-88  | 62.3249611024672      | 49.8568877363799     |                     |
| CREB1-regulon         | Activated NME1        |                      |                     |
| 0.0314563221185427    | -0.012782223124315    | 48168057             |                     |
| 0.26191726068104      | 0                     | 99.9777728384085     | 99.9951072730386    |
| CREB3-regulon         | Activated NME1        | 0.248606123569203    |                     |
| 0.00977532719130753   | 136691646.5           | 0.743270620387719    | 0                   |
| 0                     | 100                   | 100                  |                     |
| CREB3L2-regulon       | Activated NME1        |                      |                     |
| 0.122463229189436     | -0.0047887776967536   | 89782625.5           |                     |
| 0.488199458153599     | 0.00925769825682471   | 0.0095955704559789   |                     |
| 100                   | 100                   |                      |                     |
| CREB3L4-regulon       | Activated NME1        |                      |                     |
| 0.00799194684792451   | -0.00345162397048344  | 86537616             |                     |

|                       |                       |                      |                    |     |
|-----------------------|-----------------------|----------------------|--------------------|-----|
| 0.47055448652595      | 2.89116042148142e-15  | 3.31084499879324e-15 |                    |     |
| 27.3394087575017      | 31.7880470680334      |                      |                    |     |
| CREB5-regulon         | Activated NME1        | 0.0606771924482186   |                    |     |
| 0.0238695273612463    | 143048127.5           | 0.777834441201398    |                    | 0   |
| 0                     | 100                   | 99.5816718448027     |                    |     |
| CREM-regulon          | Activated NME1        | 0.160118160410013    |                    |     |
| 0.0112322749082542    | 131892044             | 0.717172437952047    |                    | 0   |
| 0                     | 100                   | 100                  |                    |     |
| CTCF-regulon          | Activated NME1        |                      |                    |     |
| 0.367551057630833     | -0.00365120898776761  | 87471379             |                    |     |
| 0.47563188973292      | 7.70385876439825e-08  | 8.16379063092949e-08 |                    | 100 |
| 100                   |                       |                      |                    |     |
| CUX1-regulon          | Activated NME1        |                      |                    |     |
| 0.0592464930622106    | -0.0193723255514861   | 29111489.5           |                    |     |
| 0.158295809693649     | 0                     | 0                    | 100                | 100 |
| DDIT3-regulon         | Activated NME1        | 0.102935270665034    |                    |     |
| 0.0200112449812679    | 134135448             | 0.729371107918761    |                    | 0   |
| 0                     | 100                   | 100                  |                    |     |
| E2F1-regulon          | Activated NME1        | 0.46427414545475     | 0.0295045757159242 |     |
| 139157910.5           | 0.75668110757005      | 0                    | 0                  | 100 |
|                       |                       |                      |                    | 100 |
| E2F2-regulon          | Activated NME1        |                      |                    |     |
| 0.0492451347428163    | -0.00519049080621324  | 72475513             |                    |     |
| 0.394090794059081     | 1.18943920780746e-120 |                      |                    |     |
| 1.74124090215113e-120 | 100                   | 100                  |                    |     |
| E2F3-regulon          | Activated NME1        | 0.0218497291816754   |                    |     |
| 0.000815259233297554  | 98170380              | 0.533808474143284    |                    |     |
| 8.93062841742104e-14  | 1.00646764704269e-13  | 100                  | 100                |     |
| E2F4-regulon          | Activated NME1        | 0.481203175197123    |                    |     |
| 0.0916307843463519    | 170976624.5           | 0.929697644427109    |                    | 0   |
| 0                     | 100                   | 100                  |                    |     |
| E2F6-regulon          | Activated NME1        | 0.121593549838473    |                    |     |
| 0.0546065314922971    | 171108525.5           | 0.930414865563953    |                    | 0   |
| 0                     | 100                   | 100                  |                    |     |
| E2F7-regulon          | Activated NME1        |                      |                    |     |
| 0.0232551032303709    | -0.00812445864552989  | 46018602.5           |                    |     |
| 0.250229447851086     | 0                     | 0                    | 100                | 100 |
| E2F8-regulon          | Activated NME1        | 0.0792306930286648   |                    |     |
| 0.00492210570398595   | 131072726.5           | 0.712717340350164    |                    | 0   |
| 0                     | 100                   | 100                  |                    |     |
| EGR1-regulon          | Activated NME1        |                      |                    |     |
| 0.0397946147189648    | -0.00851239131764498  | 46518345.5           |                    |     |
| 0.252946836215008     | 0                     | 0                    | 100                | 100 |
| EGR2-regulon          | Activated NME1        |                      |                    |     |
| 0.0447954513976569    | -0.00139030514923336  | 89808042.5           |                    |     |
| 0.488337664911964     | 0.0101139362155182    | 0.0104070937869825   |                    |     |
| 100                   | 99.9951072730386      |                      |                    |     |
| EGR3-regulon          | Activated NME1        | 0.0434948626963249   |                    |     |
| 0.00224645425105589   | 102461653             | 0.55714257850615     |                    |     |
| 2.06571931650691e-36  | 2.55071428646941e-36  | 100                  |                    |     |
| 99.9951072730386      |                       |                      |                    |     |

ELF1-regulon Activated NME1 0.69501593111025 -0.0133526114755896  
 73662748 0.400546469424701 1.26917604460216e-106  
 1.76689214052457e-106 100 100  
 ELF2-regulon Activated NME1  
 0.0185836030137128 -0.0156213004879757 43499426.5  
 0.236531247878158 0 0 98.4885530117804  
 99.6501700222619  
 ELF4-regulon Activated NME1  
 0.0116615329213865 -0.00753240153812388 53896269  
 0.293064823798237 0 0 95.7768392976217  
 98.6178046334124  
 ELK1-regulon Activated NME1 0.0710593533708843  
 0.00555517380444821 112480778.5 0.61162229117921  
 8.47113454074302e-134 1.2662116892479e-133 100 100  
 ELK3-regulon Activated NME1  
 0.044727844263274 -0.0223983979861946 28808402.5  
 0.156647752418098 0 0 100 100  
 ELK4-regulon Activated NME1  
 0.0394516145483027 -0.00615575809226711 81369746.5  
 0.442453825895253 6.63714595908607e-37  
 8.26732215956336e-37 96.8659702156035 96.7145338454388  
 ESRRA-regulon Activated NME1 0.136930518031419  
 0.0501690169743369 170400876.5 0.926566973430714 0  
 0 100 100  
 ETS1-regulon Activated NME1  
 0.209945223307933 -0.0366251406738177 35390097.5  
 0.192436190491032 0 0 100 100  
 ETV2-regulon Activated NME1  
 0.022477997754931 -0.00679805012722454 55554291.5  
 0.302080439922166 0 0 100 100  
 ETV3-regulon Activated NME1  
 0.0113163426508015 -0.000125118296695009 93710984.5  
 0.509560191642427 0.0346543273261153 0.0354022624482617  
 87.2860635696821 84.0252464711207  
 ETV5-regulon Activated NME1  
 0.0291772702934311 -0.00475813809311046 61704420.5  
 0.335522206952856 4.39168524795104e-288  
 7.9951192975519e-288 100 100  
 ETV6-regulon Activated NME1 0.463240966709196  
 0.00406956640303235 93421181 0.507984364349751  
 0.0782719788932824 0.0793901500203293 100 100  
 ETV7-regulon Activated NME1  
 0.0454291797426329 -0.0206992128251107 22727791  
 0.123583991773868 0 0 100 100  
 FLI1-regulon Activated NME1  
 0.111571063444102 -0.0359221047582902 26979423.5  
 0.146702548078152 0 0 100 100  
 FOS-regulon Activated NME1  
 0.0672849374380364 -0.0210829472891998 28569293  
 0.155347577382123 0 0 100 100



|                       |           |      |                       |                     |     |
|-----------------------|-----------|------|-----------------------|---------------------|-----|
| FOSB-regulon          | Activated | NME1 |                       |                     |     |
| 0.0287232753790156    |           |      | -0.0141535184024856   | 57324812.5          |     |
| 0.3117077746992       | 0         | 0    | 99.4443209602134      | 99.3101254984466    |     |
| FOSL1-regulon         | Activated | NME1 | 0.0950227126254206    |                     |     |
| 0.0379963151846319    |           |      | 161249709             | 0.876806844562877   | 0   |
|                       | 0         | 100  | 100                   |                     |     |
| FOXO1-regulon         | Activated | NME1 |                       |                     |     |
| 0.00805631327128275   |           |      | -0.00959168051909024  | 70467407            |     |
| 0.383171573824037     |           |      | 6.7175142588685e-164  |                     |     |
| 1.07178317388688e-163 |           |      | 36.2747277172705      | 54.1111138292928    |     |
| FOXO3-regulon         | Activated | NME1 |                       |                     |     |
| 0.0102574321028243    |           |      | -0.0105305805920538   | 74666238.5          |     |
| 0.406003020908175     |           |      | 4.53822607450841e-112 |                     |     |
| 6.44428102580194e-112 |           |      | 33.4074238719715      | 48.2300560217237    |     |
| GABPA-regulon         | Activated | NME1 |                       |                     |     |
| 0.0203566566163269    |           |      | -0.00569602772270255  | 57570674            |     |
| 0.313044664218886     |           |      | 0                     | 0                   | 100 |
|                       |           |      |                       |                     | 100 |
| GTF2B-regulon         | Activated | NME1 | 0.0922025559241314    |                     |     |
| 0.0145924022505192    |           |      | 130435286.5           | 0.709251214684175   | 0   |
|                       | 0         | 100  | 100                   |                     |     |
| HINFP-regulon         | Activated | NME1 |                       |                     |     |
| 0.0127751273896565    |           |      | -0.00383572863439903  | 82639365            |     |
| 0.449357467444049     |           |      | 2.17951610694516e-30  |                     |     |
| 2.62280751852722e-30  |           |      | 58.7463880862414      | 63.7277686718693    |     |
| HIVEP3-regulon        | Activated | NME1 |                       |                     |     |
| 0.0713767835819882    |           |      | -0.00700580470421297  | 80858357.5          |     |
| 0.439673111572015     |           |      | 2.19504640706641e-40  |                     |     |
| 2.80807738561649e-40  |           |      | 99.1775950211158      | 99.75047092497      |     |
| HOXB2-regulon         | Activated | NME1 |                       |                     |     |
| 0.0297688601241197    |           |      | -0.00814104339920279  | 81673324.5          |     |
| 0.44410455301848      |           |      | 4.67355907715251e-35  | 5.7210809392729e-35 |     |
| 84.885530117804       |           |      | 83.602025588962       |                     |     |
| IKZF1-regulon         | Activated | NME1 | 0.146775737064165     |                     |     |
| 0.00323206064863499   |           |      | 105317613.5           | 0.572672068324958   |     |
| 8.34993518445712e-58  |           |      | 1.10812223943263e-57  | 100                 | 100 |
| IRF1-regulon          | Activated | NME1 |                       |                     |     |
| 0.117658886374804     |           |      | -0.0197408494330837   | 42570027.5          |     |
| 0.231477574233823     |           |      | 0                     | 0                   | 100 |
|                       |           |      |                       |                     | 100 |
| IRF2-regulon          | Activated | NME1 |                       |                     |     |
| 0.0783455278964084    |           |      | -0.00740954495369411  | 69581696.5          |     |
| 0.378355459528282     |           |      | 1.5892218506857e-158  |                     |     |
| 2.47988464612494e-158 |           |      | 100                   | 100                 |     |
| IRF3-regulon          | Activated | NME1 |                       |                     |     |
| 0.135260391385977     |           |      | -0.0113072429972145   | 51257070            |     |
| 0.278713990164401     |           |      | 0                     | 0                   | 100 |
|                       |           |      |                       |                     | 100 |
| IRF4-regulon          | Activated | NME1 | 0.0670456662777295    |                     |     |
| 0.00958351534027485   |           |      | 126839339.5           | 0.689697995259231   | 0   |
|                       | 0         | 100  | 99.9951072730386      |                     |     |
| IRF5-regulon          | Activated | NME1 | 0.0575822431214909    |                     |     |
| 0.0116972625080937    |           |      | 109609835             | 0.596011330224525   |     |

|                       |                       |                     |
|-----------------------|-----------------------|---------------------|
| 3.11213415596466e-100 | 4.29051504997069e-100 | 92.1315847966215    |
| 79.1961249602466      |                       |                     |
| IRF7-regulon          | Activated NME1        |                     |
| 0.0858382001939905    | -0.0244174709034975   | 26970337.5          |
| 0.146653142302234     | 0 0 100               | 100                 |
| IRF8-regulon          | Activated NME1        |                     |
| 0.0622654618103084    | -0.021654491097371    | 31127629            |
| 0.169258712660461     | 0 0 100               | 100                 |
| IRF9-regulon          | Activated NME1        |                     |
| 0.026391788124676     | -0.00835258634848519  | 54731255            |
| 0.297605119991356     | 0 0 100               | 100                 |
| JUN-regulon           | Activated NME1        |                     |
| 0.0768098857346486    | -0.0128660587031243   | 47409085.5          |
| 0.257790298777325     | 0 0 100               | 100                 |
| JUNB-regulon          | Activated NME1        |                     |
| 0.148531600256583     | -0.0124891848122751   | 58293931.5          |
| 0.316977428689062     | 0 0 100               | 100                 |
| JUND-regulon          | Activated NME1        |                     |
| 0.0300732578020233    | -0.00930723617859822  | 51220109.5          |
| 0.278513014797813     | 0 0 100               | 100                 |
| KLF11-regulon         | Activated NME1        |                     |
| 0.0177670365301458    | -0.00462834904054012  | 87245298            |
| 0.474402558099053     | 2.31900250955e-10     |                     |
| 2.47592749139925e-10  | 37.9862191598133      | 41.1747437434254    |
| KLF12-regulon         | Activated NME1        |                     |
| 0.0282875502207906    | -0.0208270640743912   | 44319078.5          |
| 0.240988164347754     | 0 0 94.5098910869082  |                     |
| 99.0532573329745      |                       |                     |
| KLF13-regulon         | Activated NME1        |                     |
| 0.0541965115867716    | -0.0134268503885327   | 37813647.5          |
| 0.205614417238346     | 0 0 100               | 100                 |
| KLF2-regulon          | Activated NME1        |                     |
| 0.0820776927432949    | -0.0297171054336894   | 28892574.5          |
| 0.157105443698152     | 0 0 100               | 100                 |
| KLF3-regulon          | Activated NME1        |                     |
| 0.0497449729330298    | -0.0247368904383786   | 53808719.5          |
| 0.29258876711997 0    | 0 99.6888197377195    | 99.8825745529271    |
| KLF4-regulon          | Activated NME1        |                     |
| 0.0121793398595902    | -0.0041299317237077   | 85045939.5          |
| 0.462443388693993     | 7.9008163870898e-19   |                     |
| 9.19603218825206e-19  | 45.9879973327406      | 50.2336277124055    |
| KLF6-regulon          | Activated NME1        |                     |
| 0.0537440258707877    | -0.0173567624839658   | 54121043            |
| 0.294287048525971     | 0 0 100               | 100                 |
| KLF7-regulon          | Activated NME1        |                     |
| 0.034669541640992     | -0.0125761090945385   | 65892602            |
| 0.358295743899032     | 2.20109900237031e-214 |                     |
| 3.81165924800712e-214 | 98.0440097799511      | 97.5022628862196    |
| KLF8-regulon          | Activated NME1        |                     |
| 65130048.5            | 0.01382301480101      | -0.0125256152538608 |
|                       | 0.354149304613704     |                     |

|                       |                       |                      |                    |                  |
|-----------------------|-----------------------|----------------------|--------------------|------------------|
| 1.57602305131193e-229 | 2.76290460847276e-229 | 68.3485218937542     |                    |                  |
| 78.6579249944957      |                       |                      |                    |                  |
| MAFB-regulon          | Activated NME1        |                      |                    |                  |
| 0.0500811116616035    | -0.0063293439263785   | 68274288             |                    |                  |
| 0.371246332147223     | 2.38316019648901e-177 |                      |                    |                  |
| 3.84555395342544e-177 | 100                   | 99.9975536365193     |                    |                  |
| MAFF-regulon          | Activated NME1        |                      |                    |                  |
| 0.00635428541054495   | -0.00669662084708313  | 81443025             |                    |                  |
| 0.44285228298865      | 2.52083316482106e-56  | 3.31442879078324e-56 |                    |                  |
| 19.4932207157146      | 29.5422853927637      |                      |                    |                  |
| MAFG-regulon          | Activated NME1        | 0.0272455854726445   |                    |                  |
| 0.00204055218932905   | 97573636              | 0.530563635892743    |                    |                  |
| 2.69307673573505e-12  | 3.01115666515257e-12  | 63.8586352522783     |                    |                  |
| 58.0228490349096      |                       |                      |                    |                  |
| MAX-regulon           | Activated NME1        |                      |                    |                  |
| 0.19692233011101      | -0.000830192931940504 | 81337331             | 0.442277564291767  |                  |
|                       | 4.04891495725059e-37  | 5.08801702592552e-37 | 100                | 100              |
| MAZ-regulon           | Activated NME1        | 0.14719940565314     | 0.0120947820769731 |                  |
|                       | 144332561             | 0.784818640374036    | 0                  | 0                |
|                       | 100                   |                      |                    | 100              |
| MEF2A-regulon         | Activated NME1        |                      |                    |                  |
| 0.0263292250589928    | -0.016012742937284    | 36081464.5           |                    |                  |
| 0.196195548082834     | 0                     | 0                    | 100                | 99.9975536365193 |
| MLX-regulon           | Activated NME1        |                      |                    |                  |
| 0.0505451181650139    | -0.00264232429952349  | 86126346             |                    |                  |
| 0.468318176437705     | 2.81159412343183e-12  |                      |                    |                  |
| 3.11911223068218e-12  | 100                   | 99.9877681825966     |                    |                  |
| MXD4-regulon          | Activated NME1        |                      |                    |                  |
| 0.0792544943902249    | -0.0143360443411446   | 94163095.5           |                    |                  |
| 0.512018577594009     | 0.00799133338904392   | 0.00834389221503115  |                    |                  |
|                       | 91.2869526561458      | 88.3088289258018     |                    |                  |
| MXI1-regulon          | Activated NME1        |                      |                    |                  |
| 0.0539614040302117    | -0.012508341192955    | 63130015.5           |                    |                  |
| 0.343273981894507     | 9.09414179824595e-262 |                      |                    |                  |
| 1.63464320930497e-261 | 100                   | 100                  |                    |                  |
| MYBL1-regulon         | Activated NME1        |                      |                    |                  |
| 0.0105031220941494    | -0.0215208774061021   | 51634314             |                    |                  |
| 0.280765281440035     | 0                     | 0                    | 59.1687041564792   |                  |
| 82.3592729407735      |                       |                      |                    |                  |
| MYC-regulon           | Activated NME1        | 0.417445912460915    |                    |                  |
| 0.113852558239538     | 171598660             | 0.933080007020775    |                    | 0                |
|                       | 0                     | 100                  | 100                |                  |
| NFATC1-regulon        | Activated NME1        | 0.0616868537530113   |                    |                  |
| 0.0123982941611037    | 114516722.5           | 0.622692882533559    |                    |                  |
| 2.9531799797406e-161  | 4.65946174581294e-161 | 98.2885085574572     |                    |                  |
| 94.4467548988429      |                       |                      |                    |                  |
| NFE2L1-regulon        | Activated NME1        | 0.294378966770086    |                    |                  |
| 0.124007039075174     | 162276789             | 0.882391665642545    |                    | 0                |
|                       | 0                     | 100                  | 99.9290554590601   |                  |
| NFE2L2-regulon        | Activated NME1        | 0.144849264324918    |                    |                  |

|                       |                       |                       |     |     |
|-----------------------|-----------------------|-----------------------|-----|-----|
| 0.0377073990884539    | 164626239             | 0.89516696833136      | 0   | 0   |
| 100                   | 100                   |                       |     |     |
| NFKB1-regulon         | Activated NME1        | 0.0831406743037153    |     |     |
| 0.0293854226192917    | 145001397.5           | 0.78845548675801      | 0   | 0   |
| 100                   | 99.9241627320987      |                       |     |     |
| NFKB2-regulon         | Activated NME1        | 0.0822195998805535    |     |     |
| 0.00981628502370291   | 117119089             | 0.636843436809977     |     |     |
| 4.56904854682901e-200 | 7.54424294941534e-200 | 100                   | 100 |     |
| NFYA-regulon          | Activated NME1        |                       |     |     |
| 0.0172480742374773    | -0.00410759737986414  | 73523242.5            |     |     |
| 0.399787898274323     | 3.1665462603918e-108  |                       |     |     |
| 4.45197593045184e-108 | 99.0886863747499      | 99.0092227903222      |     |     |
| NFYB-regulon          | Activated NME1        | 0.116934534771769     |     |     |
| 0.00922421255390991   | 136595844.5           | 0.742749690149496     |     | 0   |
| 0                     | 100                   | 100                   |     |     |
| NFYC-regulon          | Activated NME1        | 0.0862007900454493    |     |     |
| 0.00295948194322243   | 112581096.5           | 0.612167777490958     |     |     |
| 4.33161773417315e-135 | 6.54350764098497e-135 | 100                   | 100 |     |
| NR1H3-regulon         | Activated NME1        |                       |     |     |
| 0.00599887648154437   | -0.0028145750019005   | 87778604.5            |     |     |
| 0.477302450398703     | 5.46733235908925e-12  |                       |     |     |
| 5.92642133580666e-12  | 18.5596799288731      | 22.4943122049074      |     |     |
| NR2C2-regulon         | Activated NME1        |                       |     |     |
| 0.0139808152573328    | -0.00866442517017826  | 70665065.5            |     |     |
| 0.384246356077976     | 9.99415885377467e-146 |                       |     |     |
| 1.54257669264783e-145 | 66.5925761280284      | 77.011522371994       |     |     |
| NR3C1-regulon         | Activated NME1        |                       |     |     |
| 0.208261967731519     | -0.0191104010844849   | 33299385              |     |     |
| 0.181067791494336     | 0                     | 0                     | 100 | 100 |
| NRF1-regulon          | Activated NME1        | 0.0270649788531771    |     |     |
| 0.00037277309599015   | 97751687.5            | 0.531531803679543     |     |     |
| 3.5570323692316e-12   | 3.91549299558827e-12  | 100                   |     |     |
| 99.9633045477897      |                       |                       |     |     |
| PAX5-regulon          | Activated NME1        |                       |     |     |
| 0.0812507915909873    | -0.0211099220907379   | 37285835              |     |     |
| 0.202744398957285     | 0                     | 0                     | 100 | 100 |
| POU2F1-regulon        | Activated NME1        |                       |     |     |
| 0.0026946494226805    | -0.00242585316590786  | 86174842.5            |     |     |
| 0.468581879630728     | 1.01285692695447e-24  | 1.1886420134507e-24   |     |     |
| 12.8695265614581      | 18.9495315213934      |                       |     |     |
| POU6F1-regulon        | Activated NME1        |                       |     |     |
| 0.0163200281911418    | -0.01629804157726     | 67270929.5            |     |     |
| 0.365790498423205     | 8.80191117404107e-201 |                       |     |     |
| 1.47043692554568e-200 | 50.6334741053567      | 66.9740930107395      |     |     |
| REL-regulon           | Activated NME1        | 0.295277384428737     |     |     |
| 0.0350395503508582    | 160924291             | 0.87503736087504      | 0   | 0   |
| 100                   | 100                   |                       |     |     |
| RELA-regulon          | Activated NME1        |                       |     |     |
| 0.0885434903885212    | -0.00390849604020052  | 72650877              |     |     |
| 0.3950443483721       | 1.59483572029879e-118 | 2.31088441104519e-118 |     | 100 |

100

RELB-regulon Activated NME1 0.119271011179693  
0.0156378108335334 144283518.5 0.784551968266897 0  
0 100 100

REST-regulon Activated NME1 0.2092533671981 -0.0103958460552805  
48314637.5 0.262714302650768 0 0 100  
100

RFX5-regulon Activated NME1  
0.0528102752338925 -0.0139181771987151 47515994  
0.258371621404964 0 0 100 100

RXRA-regulon Activated NME1 0.0152720230959841  
0.000823537521926652 95646779.5 0.520086215634636  
5.77886764341386e-06 6.07851263233162e-06 68.2596132473883  
63.823176847616

SETDB1-regulon Activated NME1 0.0685320657939079  
0.00978468371087743 112233947 0.610280127215034  
1.15493301021098e-130 1.70833841093707e-130 98.6219159813292  
94.6595885216626

SOX5-regulon Activated NME1  
0.00465433935726055 -0.00349554512121881 84979450  
0.462081847274458 2.67668642478123e-30  
3.19402917915071e-30 16.0924649922205 23.198864887345

SP1-regulon Activated NME1  
0.00838885482524338 -0.00511185600195994 75897475.5  
0.412697960301083 3.38152570386647e-88  
4.57311095189561e-88 49.4332073794176 60.9658243021748

SP2-regulon Activated NME1  
0.0264633932775172 -0.00197231775922203 80067188  
0.435371070736646 4.31268483703153e-46  
5.61836006292181e-46 100 100

SP3-regulon Activated NME1  
0.0204790921076675 -0.00864827929983677 39973308.5  
0.21735772864324 0 0 100 100

SP4-regulon Activated NME1  
0.00539499145206512 -0.00359985619193185 84157843.5  
0.457614303071092 1.96775871389753e-31  
2.38821997755085e-31 22.3605245610136 29.7477799251413

SPI1-regulon Activated NME1  
0.391227429196005 -0.0303219494710899 41717771  
0.226843368459702 0 0 100 100

SPIB-regulon Activated NME1 0.585871119980678  
0.0237774146400309 133983635 0.728545613855428 0  
0 100 100

SREBF1-regulon Activated NME1  
0.0402041520102126 -0.000805603092083176 90570690.5  
0.492484618047813 0.0974383157465199 0.098129367631247  
97.5550122249389 96.8221738385889

SREBF2-regulon Activated NME1  
0.0884086959094003 -0.0117377257395564 45337685  
0.246526910164133 0 0 100 100

|                       |           |      |                       |     |                     |
|-----------------------|-----------|------|-----------------------|-----|---------------------|
| SRF-regulon           | Activated | NME1 |                       |     |                     |
| 0.0193766162167961    |           |      | -0.00154582772589084  |     | 86171537.5          |
| 0.468563908456459     |           |      | 4.12963260341748e-12  |     |                     |
| 4.51082945911755e-12  |           |      | 98.6441431429207      |     | 97.8569855909191    |
| STAT1-regulon         | Activated | NME1 |                       |     |                     |
| 0.071996030172313     |           |      | -0.0086279339443346   |     | 54059675.5          |
| 0.293953358348374     |           |      | 0                     | 0   | 100                 |
| STAT2-regulon         | Activated | NME1 |                       |     |                     |
| 0.0502784559674177    |           |      | -0.0177120350898054   |     | 50578067.5          |
| 0.275021865427138     |           |      | 0                     | 0   | 99.9777728384085    |
| 99.960858184309       |           |      |                       |     |                     |
| STAT5A-regulon        | Activated | NME1 | 0.0993409502014644    |     |                     |
| 0.0307854817382289    |           |      | 161832065.5           |     | 0.8799734449751452  |
| 0                     |           |      | 100                   |     | 100                 |
| TBP-regulon           | Activated | NME1 |                       |     |                     |
| 0.0143036083803525    |           |      | -0.00732380747445865  |     | 81070723.5          |
| 0.440827866910845     |           |      | 2.84512126905432e-44  |     |                     |
| 3.67279291096103e-44  |           |      | 42.1871527006001      |     | 50.7326858624654    |
| TCF12-regulon         | Activated | NME1 |                       |     |                     |
| 0.00633868656860472   |           |      | -0.00300274711114148  |     | 87128313            |
| 0.473766443780786     |           |      | 3.33715986984049e-14  |     | 3.7910136121388e-14 |
| 21.2047121582574      |           |      | 25.6623529123957      |     |                     |
| TFDP1-regulon         | Activated | NME1 | 0.559362147011918     |     |                     |
| 0.0346326486276138    |           |      | 146633964.5           |     | 0.797332686777065   |
| 0                     |           |      | 100                   |     | 100                 |
| TFDP2-regulon         | Activated | NME1 |                       |     |                     |
| 0.020822191442834     |           |      | -0.00699445811293859  |     | 55264165            |
| 0.30050285629385      |           |      | 0                     | 100 | 99.9951072730386    |
| TFEC-regulon          | Activated | NME1 | 0.0982928509377953    |     |                     |
| 0.00749436701717561   |           |      | 112713282             |     | 0.612886545616933   |
| 8.42474638842718e-137 |           |      | 1.2863591259749e-136  |     | 100                 |
| 100                   |           |      | 100                   |     | 100                 |
| THAP1-regulon         | Activated | NME1 |                       |     |                     |
| 0.0370581291523171    |           |      | -0.000118758734275526 |     | 91697766.5          |
| 0.498613174541161     |           |      | 0.759728124485584     |     | 0.759728124485584   |
| 100                   |           |      | 100                   |     |                     |
| THAP11-regulon        | Activated | NME1 | 0.182966441779073     |     |                     |
| 0.00498277016081733   |           |      | 115762243             |     | 0.629465489480982   |
| 2.71480080828008e-179 |           |      | 4.43105419282495e-179 |     | 100                 |
| 100                   |           |      | 100                   |     | 100                 |
| TP53-regulon          | Activated | NME1 | 0.12766579761856      |     | 0.0325349210743099  |
| 161935482             |           |      | 0.880535784378926     |     | 0                   |
| 100                   |           |      | 0                     |     | 0                   |
| 100                   |           |      |                       |     | 100                 |
| USF2-regulon          | Activated | NME1 |                       |     |                     |
| 0.110297540629443     |           |      | -0.0166383452662519   |     | 33900029.5          |
| 0.184333838993058     |           |      | 0                     | 0   | 100                 |
| 100                   |           |      | 100                   |     | 100                 |
| XBP1-regulon          | Activated | NME1 |                       |     |                     |
| 0.183088041252005     |           |      | -0.0135447813838775   |     | 60699817            |
| 0.330059603452147     |           |      | 2.16848259591494e-307 |     |                     |
| 3.99901985220678e-307 |           |      | 100                   |     | 100                 |
| 100                   |           |      | 100                   |     |                     |
| YBX1-regulon          | Activated | NME1 | 0.0972298575547724    |     |                     |
| 0.00227129271633567   |           |      | 108766684.5           |     | 0.591426638977754   |

|                       |                       |                      |                     |
|-----------------------|-----------------------|----------------------|---------------------|
| 2.09322836448793e-90  | 2.85806180535853e-90  | 100                  | 100                 |
| YY1-regulon           | Activated NME1        | 0.678621725628686    |                     |
| 0.0434593598289669    | 149055720             | 0.810501155802071    | 0                   |
| 0                     | 100                   | 100                  |                     |
| YY2-regulon           | Activated NME1        |                      |                     |
| 0.0317199653001101    | -0.0214043151731979   | 58081539             |                     |
| 0.315822529254584     | 0                     | 0                    | 80.6845965770171    |
| 91.6138659882085      |                       |                      |                     |
| ZBTB33-regulon        | Activated NME1        | 0.36964566467101     | 0.00424004892435642 |
| 97648236              | 0.530969278737062     | 8.50951931298156e-12 |                     |
| 9.15417986699532e-12  | 100                   | 100                  |                     |
| ZNF143-regulon        | Activated NME1        |                      |                     |
| 0.0182368788340467    | -0.00565449654699762  | 56253675             |                     |
| 0.305883387807017     | 0                     | 0                    | 100                 |
| ZNF274-regulon        | Activated NME1        |                      |                     |
| 0.0602218850897296    | -0.00568312358546303  | 72678783.5           |                     |
| 0.395196091965062     | 3.46318592640025e-118 |                      |                     |
| 4.96739799544279e-118 | 100                   | 100                  |                     |
| ZNF76-regulon         | Activated NME1        |                      |                     |
| 0.0110106659667809    | -0.00393676865851541  | 64791382             |                     |
| 0.352307781257999     | 1.06433826566503e-232 |                      |                     |
| 1.88920042155543e-232 | 98.7330517892865      | 99.540083665631      |                     |
| ATF1-regulon          | ASC IgG               | 0.0847176905544194   | -0.022124486274079  |
| 5178834               | 0.0929527078831718    | 0                    | 0                   |
|                       |                       | 100                  | 100                 |
| ATF3-regulon          | ASC IgG               | 0.0364414161242288   | -0.0149978155852696 |
| 11656076.5            | 0.209210002477083     |                      |                     |
| 6.54080008344923e-273 | 1.57422646076236e-272 | 100                  | 100                 |
| ATF4-regulon          | ASC IgG               |                      |                     |
| 0.104486713306767     | -0.00438703847749566  | 24211702.5           |                     |
| 0.434565639647218     | 1.97962680272254e-15  |                      |                     |
| 2.21344099202048e-15  | 100                   | 100                  |                     |
| ATF5-regulon          | ASC IgG               | 0.133629712777597    | 0.0156313559199938  |
| 34813455.5            | 0.624852034163539     |                      |                     |
| 7.03132788681047e-52  | 9.60046692237583e-52  | 100                  |                     |
| 99.9977330945526      |                       |                      |                     |
| ATF6-regulon          | ASC IgG               | 0.292295085039482    | 0.160344174887955   |
| 55374345.5            | 0.993890779562219     | 0                    | 0                   |
| 100                   |                       |                      | 100                 |
| ATF6B-regulon         | ASC IgG               |                      |                     |
| 0.0551223003404527    | -0.00223646094622511  | 22992161.4628906     |                     |
| 0.412676611774541     | 2.96826881882186e-26  |                      |                     |
| 3.63357045062676e-26  | 99.9208234362629      | 99.9206583093419     |                     |
| BACH1-regulon         | ASC IgG               |                      |                     |
| 0.0432286792234352    | -5.57072345341927e-05 | 28239839             |                     |
| 0.506864963278375     | 0.40468203931185      | 0.413416184045199    |                     |
| 99.7624703087886      | 99.5579534377621      |                      |                     |
| BATF-regulon          | ASC IgG               |                      |                     |
| 0.0111166300690657    | -0.00841083112702434  | 24263592.5           |                     |
| 0.435496991378526     | 9.46668167610478e-17  | 1.0754150384055e-16  |                     |
| 44.2596991290578      | 51.9302699884388      |                      |                     |

|                       |                       |                       |                     |
|-----------------------|-----------------------|-----------------------|---------------------|
| BATF3-regulon         | ASC IgG               | 0.0714860928637652    | -0.0120118613912421 |
| 22821012              | 0.409604722227891     | 5.18510424913175e-28  |                     |
| 6.40247655110181e-28  | 100                   | 100                   |                     |
| BCL11A-regulon        | ASC IgG               | 0.156428977228396     | -0.0494476861897257 |
| 3282841.5             | 0.0589223379193566    | 0                     | 0 100               |
| 100                   |                       |                       |                     |
| BHLHE40-regulon       | ASC IgG               | 0.0363634207056072    | -0.0198399836909514 |
| 9564921.5             | 0.171676743088303     | 0                     | 0 100               |
| 100                   |                       |                       |                     |
| BRF2-regulon          | ASC IgG               |                       |                     |
| 0.0342813105866521    | -0.00754091940880204  | 20720241.5            |                     |
| 0.371898878283852     | 1.60872600818277e-54  |                       |                     |
| 2.23959895256817e-54  | 99.5249406175772      | 99.7347720626573      |                     |
| CEBPB-regulon         | ASC IgG               | 0.15643781935699      | 0.013727901958755   |
| 40097203              | 0.719687790222903     | 1.15663227003695e-156 |                     |
| 1.97881665476201e-156 | 100                   | 100                   |                     |
| CEBPG-regulon         | ASC IgG               | 0.0698811652596658    | 0.00187255232192179 |
| 30044628              | 0.539258360075369     | 1.88577789522186e-06  |                     |
| 2.05984970093465e-06  | 100                   | 100                   |                     |
| CLOCK-regulon         | ASC IgG               |                       |                     |
| 0.0117346513849727    | -0.00397059368981877  | 25410530.5            |                     |
| 0.456082897950181     | 1.40390826721697e-08  |                       |                     |
| 1.54538739492101e-08  | 46.4766429136975      | 51.2252623943055      |                     |
| CREB1-regulon         | ASC IgG               | 0.0270840997037513    | -0.0163419603959422 |
| 10905729.5            | 0.195742340547387     |                       |                     |
| 1.43298646577717e-298 | 3.69971051164289e-298 | 99.8416468725257      |                     |
| 99.9977330945526      |                       |                       |                     |
| CREB3-regulon         | ASC IgG               | 0.394451895950807     | 0.159079722920381   |
| 54738328              | 0.982475169622591     | 0                     | 0 100 100           |
| CREB3L2-regulon       | ASC IgG               | 0.269949157897225     | 0.147271113552776   |
| 55228244.5            | 0.99126847431466      | 0                     | 0 100 100           |
| CREB3L4-regulon       | ASC IgG               | 0.0152292312779765    | 0.0042460722520932  |
| 31599663              | 0.567169027631639     | 3.64435195464457e-23  |                     |
| 4.3124831463294e-23   | 44.8139350752177      | 30.9613946002312      |                     |
| CREB5-regulon         | ASC IgG               | 0.0233107992268065    | -0.0163177020123123 |
| 14880953.5            | 0.26709196002586      | 7.84193790856983e-176 |                     |
| 1.39194397877114e-175 | 98.4164687252573      | 99.6576972774466      |                     |
| CREM-regulon          | ASC IgG               | 0.162799097408037     | 0.0131660031883354  |
| 41501694.5            | 0.744896415972232     |                       |                     |
| 3.51697182618747e-194 | 6.65879999091494e-194 | 100                   | 100                 |
| CTCF-regulon          | ASC IgG               | 0.3104388206223       | -0.0621307853986845 |
| 1888529               | 0.0338964107491954    | 0                     | 0 100 100           |
| CUX1-regulon          | ASC IgG               | 0.0615769825247789    | -0.0155540149551062 |
| 11946675.5            | 0.214425841401085     |                       |                     |
| 2.76449413002606e-263 | 6.54263610772833e-263 | 100                   | 100                 |
| DDIT3-regulon         | ASC IgG               | 0.0909397904209529    | 0.00620435584847656 |
| 32105221.5            | 0.576243083986478     |                       |                     |
| 2.15014190653068e-20  | 2.50262418628981e-20  | 100                   | 100                 |
| E2F1-regulon          | ASC IgG               | 0.396900502503576     | -0.0419624120103513 |
| 13689599              | 0.2457088404233       | 3.35323579009254e-209 |                     |



|                       |                       |                       |                   |     |     |                       |
|-----------------------|-----------------------|-----------------------|-------------------|-----|-----|-----------------------|
| 6.43458759720461e-209 | 100                   | 100                   |                   |     |     |                       |
| E2F2-regulon          | ASC IgG               | 0.0430439745712076    |                   |     |     | -0.011188437345737    |
| 10878627.5            |                       | 0.195255898176566     |                   |     |     |                       |
| 1.61344782646644e-299 | 4.24277021033767e-299 | 100                   | 100               |     |     |                       |
| E2F3-regulon          | ASC IgG               | 0.0146682793928053    |                   |     |     | -0.0066316077786654   |
| 14217450              | 0.255183015461318     |                       |                   |     |     | 4.6854482141173e-194  |
| 8.75439008427179e-194 | 100                   | 100                   |                   |     |     |                       |
| E2F4-regulon          | ASC IgG               | 0.375014912875276     |                   |     |     | -0.0243195207623676   |
| 21050729              | 0.377830659075926     |                       |                   |     |     | 9.47514483434862e-50  |
| 1.26931185516746e-49  | 100                   | 100                   |                   |     |     |                       |
| E2F6-regulon          | ASC IgG               |                       |                   |     |     |                       |
| 0.0658209493982128    |                       | -0.00676866977459317  |                   |     |     | 27879129.5            |
| 0.500390740550984     |                       | 0.96217199099831      | 0.96217199099831  | 100 | 100 |                       |
| E2F7-regulon          | ASC IgG               | 0.0194339945253931    |                   |     |     | -0.0114589831716364   |
| 8914532               | 0.160003176180427     | 0                     | 0                 | 100 | 100 |                       |
| E2F8-regulon          | ASC IgG               | 0.0521631815850432    |                   |     |     | -0.0232814472922707   |
| 4112762.5             | 0.0738182400237898    | 0                     | 0                 | 100 | 100 |                       |
| 100                   |                       |                       |                   |     |     |                       |
| EGR1-regulon          | ASC IgG               | 0.0480334510794343    |                   |     |     |                       |
| 0.000586775299827473  |                       | 28848210              | 0.517784357846263 |     |     |                       |
| 0.0308721418923045    |                       | 0.0322341481522591    |                   | 100 | 100 |                       |
| EGR2-regulon          | ASC IgG               | 0.0355674332288905    |                   |     |     | -0.0107805421533597   |
| 17697704              | 0.317648627106959     |                       |                   |     |     | 1.4763295415485e-108  |
| 2.32931994333207e-108 | 100                   | 99.9954661891053      |                   |     |     |                       |
| EGR3-regulon          | ASC IgG               | 0.0313809306619997    |                   |     |     | -0.0103791052426524   |
| 17006958              | 0.305250718396336     |                       |                   |     |     | 1.52285844118594e-123 |
| 2.45733975736823e-123 | 100                   | 99.9954661891053      |                   |     |     |                       |
| ELF1-regulon          | ASC IgG               | 0.633251188440448     |                   |     |     | -0.0759062331438033   |
| 3413438               | 0.0612663594336714    | 0                     | 0                 | 100 | 100 |                       |
| ELF2-regulon          | ASC IgG               | 0.0166672395155743    |                   |     |     | -0.0164465987382068   |
| 12189310              | 0.218780785738146     |                       |                   |     |     | 2.21570512642361e-255 |
| 5.07467948309923e-255 | 98.2581155977831      | 99.5715548704463      |                   |     |     |                       |
| ELF4-regulon          | ASC IgG               |                       |                   |     |     |                       |
| 0.0103313115227792    |                       | -0.00834815369294973  |                   |     |     | 14845199              |
| 0.266450217580744     |                       | 8.60391186684116e-177 |                   |     |     |                       |
| 1.5465259304955e-176  |                       | 95.1702296120348      | 98.4267676195226  |     |     |                       |
| ELK1-regulon          | ASC IgG               |                       |                   |     |     |                       |
| 0.0583471760622128    |                       | -0.00792847727322665  |                   |     |     | 18616746.5            |
| 0.33414413343806      | 3.8646451371244e-90   |                       |                   |     |     | 5.90085601582435e-90  |
| 100                   |                       |                       |                   |     |     | 100                   |
| ELK3-regulon          | ASC IgG               | 0.0903068403131027    |                   |     |     | 0.0261286516508818    |
| 47704769.5            |                       | 0.85623279370753      | 0                 | 100 | 100 |                       |
| ELK4-regulon          | ASC IgG               | 0.0225993631599332    |                   |     |     | -0.023038938238983    |
| 13463117              | 0.241643810498263     |                       |                   |     |     | 6.9781722318117e-216  |
| 1.35739788618803e-215 | 86.6983372921615      | 97.0167524312561      |                   |     |     |                       |
| ESRRA-regulon         | ASC IgG               |                       |                   |     |     |                       |
| 0.0912762009804512    |                       | -0.000472681151695992 |                   |     |     | 32438014              |
| 0.582216236251681     |                       | 1.87128266017612e-23  |                   |     |     |                       |
| 2.23295914071436e-23  | 100                   | 100                   |                   |     |     |                       |
| ETS1-regulon          | ASC IgG               | 0.209189310656621     |                   |     |     | -0.0347159832201295   |

|                       |                       |                   |                       |                       |
|-----------------------|-----------------------|-------------------|-----------------------|-----------------------|
|                       | 11116778              | 0.199530361088243 |                       | 3.09485768097508e-291 |
| 7.70999632804318e-291 | 100                   | 100               |                       |                       |
| ETV2-regulon          | ASC                   | IgG               |                       |                       |
| 0.0279973025588627    |                       |                   | -0.000622037047295691 | 27159481.5            |
| 0.487474082028485     |                       |                   | 0.128402455682121     | 0.133088676692417     |
|                       | 100                   | 100               |                       |                       |
| ETV3-regulon          | ASC                   | IgG               |                       |                       |
| 0.00821938690496731   |                       |                   | -0.00330156472098872  | 23025945              |
| 0.413282978237762     |                       |                   | 5.28898907689825e-26  |                       |
| 6.41911494803036e-26  |                       |                   | 81.1559778305622      | 84.4399610092263      |
| ETV5-regulon          | ASC                   | IgG               |                       |                       |
| 0.0252940188502073    |                       |                   | -0.00840352794685916  | 12378291.5            |
| 0.222172735000243     |                       |                   | 2.6164156165954e-249  |                       |
| 5.80517214932105e-249 | 100                   | 100               |                       |                       |
| ETV6-regulon          | ASC                   | IgG               | 0.410593163130779     | -0.05038412869942     |
| 5455963               | 0.09792677945661      | 0                 | 0                     | 100 100               |
| ETV7-regulon          | ASC                   | IgG               | 0.122408163831764     | 0.0600021911766684    |
| 54772479.5            | 0.983088140496589     |                   | 0                     | 0 100                 |
|                       | 100                   |                   |                       |                       |
| FLI1-regulon          | ASC                   | IgG               | 0.113544209740141     | -0.0312573252754418   |
| 9134891.5             | 0.16395831593443      | 0                 | 0                     | 100 100               |
| FOS-regulon           | ASC                   | IgG               | 0.151949323059974     | 0.0675520487303158    |
| 54698366              | 0.981757908534009     | 0                 | 0                     | 100 100               |
| FOSB-regulon          | ASC                   | IgG               | 0.0634919908058085    | 0.0226489211676321    |
| 42900128              | 0.769996309233831     |                   | 1.43030506831396e-235 |                       |
| 2.98681352500857e-235 | 100                   | 99.3040600276562  |                       |                       |
| FOSL1-regulon         | ASC                   | IgG               |                       |                       |
| 0.0512856891256164    |                       |                   | -0.00978024170935817  | 22299605.5            |
| 0.40024621680314      | 9.53264094323523e-34  |                   | 1.21949100354901e-33  | 100                   |
|                       | 100                   |                   |                       |                       |
| FOX01-regulon         | ASC                   | IgG               | 0.0046522231018446    | -0.0123896157619585   |
| 18443351.5            | 0.331031939692633     |                   |                       |                       |
| 1.35901570528044e-104 | 2.12066186977827e-104 |                   |                       | 24.0696753760887      |
| 53.1521320245732      |                       |                   |                       |                       |
| FOX03-regulon         | ASC                   | IgG               | 0.0661643817485583    | 0.0477495342475788    |
| 44636497.5            | 0.801161673273449     |                   | 0                     | 0                     |
| 85.9857482185273      | 45.6373404665291      |                   |                       |                       |
| GABPA-regulon         | ASC                   | IgG               | 0.0156579665264377    | -0.0101114022338024   |
| 10201971.5            | 0.183110884935092     |                   | 0                     | 0 100                 |
|                       | 100                   |                   |                       |                       |
| GTF2B-regulon         | ASC                   | IgG               | 0.113869550417463     | 0.0358092890740571    |
| 49252935.5            | 0.884020172479018     |                   | 0                     | 0 100                 |
|                       | 100                   |                   |                       |                       |
| HINFP-regulon         | ASC                   | IgG               | 0.0213037315741593    | 0.00521843592790493   |
| 32871483.5            | 0.589996397540837     |                   |                       |                       |
| 3.80855280617745e-29  | 4.74398682874736e-29  |                   |                       | 77.4346793349169      |
| 62.8272844739646      |                       |                   |                       |                       |
| HIVEP3-regulon        | ASC                   | IgG               | 0.064510670153598     | -0.0135545766966823   |
| 21254100.5            | 0.381480888380681     |                   |                       |                       |
| 6.31729126516773e-47  | 8.30606814494275e-47  |                   |                       | 99.6832937450515      |

|                       |                  |                       |                       |         |
|-----------------------|------------------|-----------------------|-----------------------|---------|
| 99.6939677646045      |                  |                       |                       |         |
| HOXB2-regulon         | ASC IgG          | 0.104076327989539     | 0.0688911257641067    |         |
| 50265361.5            |                  | 0.902191779877773     | 0                     | 0       |
| 99.3665874901029      | 83.2815723256183 |                       |                       |         |
| IKZF1-regulon         | ASC IgG          | 0.122477360735168     | -0.021999097344781    |         |
| 4672351.5             |                  | 0.0838620670419248    | 0                     | 0 100   |
| 100                   |                  |                       |                       |         |
| IRF1-regulon          | ASC IgG          | 0.244097919412466     | 0.11176639223904      |         |
| 54977130.5            |                  | 0.986761335007361     | 0                     | 100 100 |
| IRF2-regulon          | ASC IgG          | 0.116970459097048     | 0.0328647996982315    |         |
| 48515877              |                  | 0.870791020232912     | 0                     | 100 100 |
| IRF3-regulon          | ASC IgG          | 0.181406736588479     | 0.0369897850500218    |         |
| 52450798              |                  | 0.941417258157579     | 0                     | 100 100 |
| IRF4-regulon          | ASC IgG          | 0.122092558516174     | 0.0655034375076755    |         |
| 54730770              |                  | 0.982339514267316     | 0                     | 100     |
| 99.9954661891053      |                  |                       |                       |         |
| IRF5-regulon          | ASC IgG          | 0.00654835290567023   | -0.0416558566157308   |         |
| 8838532.5             |                  | 0.158639093199052     | 0                     | 0       |
| 29.9287410926366      | 81.9259628680888 |                       |                       |         |
| IRF7-regulon          | ASC IgG          | 0.182165630891415     | 0.0764591058691104    |         |
| 54676816              |                  | 0.981371116670264     | 0                     | 100 100 |
| IRF8-regulon          | ASC IgG          | 0.0513582781860765    | -0.0312854486595875   |         |
| 4545087.5             |                  | 0.0815778591650081    | 0                     | 0 100   |
| 100                   |                  |                       |                       |         |
| IRF9-regulon          | ASC IgG          |                       |                       |         |
| 0.0333873907564144    |                  | -0.000543971327029907 | 27736383.5            |         |
| 0.497828652783836     |                  | 0.792116318094936     | 0.803432265496292     |         |
| 100                   | 100              |                       |                       |         |
| JUN-regulon           | ASC IgG          | 0.101813791151963     | 0.0137975501690764    |         |
| 41015267              |                  | 0.736165733870075     | 9.98655723739792e-181 |         |
| 1.8180655483468e-180  |                  | 100                   | 100                   |         |
| JUNB-regulon          | ASC IgG          | 0.151244654593863     | -0.0087822830903117   |         |
| 20981088.5            |                  | 0.376580711104367     |                       |         |
| 9.77397552895808e-51  |                  | 1.32181383344005e-50  | 100                   | 100     |
| JUND-regulon          | ASC IgG          | 0.027386929295166     | -0.0113877255140143   |         |
| 12736946              |                  | 0.228610073399096     | 5.48745336535343e-238 |         |
| 1.16301250429879e-237 |                  | 100                   | 100                   |         |
| KLF11-regulon         | ASC IgG          | 0.00676577804035995   | -0.0156050626564205   |         |
| 21313553.5            |                  | 0.382547985210156     |                       |         |
| 1.11969977399573e-57  |                  | 1.58997367907393e-57  | 21.4568487727633      |         |
| 41.4140956180718      |                  |                       |                       |         |
| KLF12-regulon         | ASC IgG          |                       |                       |         |
| 0.0415136529852907    |                  | -0.00569447235796546  | 23949441.5            |         |
| 0.429858427536896     |                  | 1.68030408432061e-17  |                       |         |
| 1.92421919333489e-17  |                  | 98.9707046714173      | 98.5922517171809      |         |
| KLF13-regulon         | ASC IgG          | 0.135521398633612     | 0.0712114050575879    |         |
| 55195307.5            |                  | 0.990677301989085     | 0                     | 0 100   |
| 100                   |                  |                       |                       |         |
| KLF2-regulon          | ASC IgG          | 0.0805989998717862    | -0.0290581752896085   |         |
| 8693193               |                  | 0.156030455793917     | 0                     | 100 100 |

|                       |                   |                       |                      |
|-----------------------|-------------------|-----------------------|----------------------|
| KLF3-regulon          | ASC IgG           | 0.0429234640621619    | -0.0299390804745564  |
| 13162395.5            |                   | 0.236246287089772     |                      |
| 6.69925092963526e-225 |                   | 1.35899090286887e-224 | 99.6041171813143     |
| 99.8707863894997      |                   |                       |                      |
| KLF4-regulon          | ASC IgG           | 0.0269497732915539    | 0.0113663538716203   |
| 34591687.5            |                   | 0.620871613836911     |                      |
| 1.57521034375733e-55  |                   | 2.21465216647071e-55  | 67.8543151227237     |
| 49.2961258585904      |                   |                       |                      |
| KLF6-regulon          | ASC IgG           | 0.0420483324755483    | -0.0281140743898501  |
| 10125834              | 0.181744325049903 | 0                     | 0 100 100            |
| KLF7-regulon          | ASC IgG           | 0.0240748395251268    | -0.0225516019011844  |
| 13206067              | 0.237030128429796 | 1.39638736675287e-223 |                      |
| 2.79277473350574e-223 |                   | 94.6159936658749      | 97.6401514292839     |
| KLF8-regulon          | ASC IgG           | 0.0150440627083541    | -0.0103507651914044  |
| 21491809.5            |                   | 0.38574742699501      | 3.30263203267936e-44 |
| 4.30251145541714e-44  |                   | 70.8630245447348      | 77.8296647246843     |
| MAFB-regulon          | ASC IgG           | 0.0607275841287688    | 0.00508624992613332  |
| 33280056              | 0.597329693074464 | 3.29796255085948e-32  |                      |
| 4.18134537698255e-32  | 100               | 99.9977330945526      |                      |
| MAFF-regulon          | ASC IgG           |                       |                      |
| 0.005388472017359     |                   | -0.00719884203965776  | 24187634             |
| 0.434133644288864     |                   | 1.10621159030477e-23  |                      |
| 1.33120377816337e-23  |                   | 16.8646080760095      | 28.8803753995421     |
| MAFG-regulon          | ASC IgG           |                       |                      |
| 0.0205880805223671    |                   | -0.00495725280032153  | 25766690             |
| 0.462475454646016     |                   | 2.29477570748088e-06  |                      |
| 2.48746679742202e-06  |                   | 55.1068883610451      | 58.7015165597443     |
| MAX-regulon           | ASC IgG           | 0.167080799000072     | -0.0314652168786717  |
| 2486214.5             |                   | 0.0446240157829747    | 0 0 100              |
| 100                   |                   |                       |                      |
| MAZ-regulon           | ASC IgG           | 0.116019114059117     | -0.0208654705961951  |
| 6898219               | 0.123813224293566 | 0                     | 0 100 100            |
| MEF2A-regulon         | ASC IgG           | 0.0259752872143907    | -0.0152021666330565  |
| 11550081.5            |                   | 0.207307542913391     |                      |
| 1.82510992165678e-276 |                   | 4.46837256681488e-276 | 100                  |
| 99.9977330945526      |                   |                       |                      |
| MLX-regulon           | ASC IgG           | 0.0894311505876856    | 0.0375508878747655   |
| 50660350.5            |                   | 0.909281270897193     | 0 0 100              |
| 99.9886654727631      |                   |                       |                      |
| MXD4-regulon          | ASC IgG           | 0.631014412280549     | 0.554272970545154    |
| 55488007              | 0.99593084190194  | 0                     | 99.9208234362629     |
| 88.2800988370775      |                   |                       |                      |
| MXI1-regulon          | ASC IgG           | 0.0369295389424644    | -0.0291102707402816  |
| 7742715               | 0.138970726927654 | 0                     | 0 100 100            |
| MYBL1-regulon         | ASC IgG           |                       |                      |
| 0.0243640092458474    |                   | -0.00568443067426361  | 27772815             |
| 0.498482546416504     |                   | 0.853286714808313     | 0.859338393636741    |
| 85.9065716547902      |                   | 79.8925486817945      |                      |
| MYC-regulon           | ASC IgG           | 0.28474219364003      | -0.0310024918291402  |
| 20089681.5            |                   | 0.360581222710645     | 3.04195582540268e-64 |

|                            |                       |                       |                     |         |
|----------------------------|-----------------------|-----------------------|---------------------|---------|
| 4.40773191027735e-64       | 100                   | 100                   |                     |         |
| NFATC1-regulon ASC IgG     |                       |                       |                     |         |
| 0.0436860496236848         | -0.00702739368777646  |                       | 25904304.5          |         |
| 0.464945439283289          | 2.08750391061267e-05  |                       |                     |         |
| 2.24564814626515e-05       | 95.5661124307205      | 94.8065196200666      |                     |         |
| NFE2L1-regulon ASC IgG     | 0.16727566516061      | -0.0158321510111689   |                     |         |
| 26151928 0.469389929077808 |                       | 0.000202770300675668  |                     |         |
| 0.00021649159921763        | 99.8416468725257      | 99.9387935529209      |                     |         |
| NFE2L2-regulon ASC IgG     | 0.0903218763543448    |                       | -0.021147267336477  |         |
| 12569222 0.225599666041572 |                       | 3.00470479237883e-243 |                     |         |
| 6.56412431565837e-243      | 100                   | 100                   |                     |         |
| NFKB1-regulon ASC IgG      | 0.0224869521399837    |                       | -0.0351605054404075 |         |
| 6120180 0.109848530331814  |                       | 0                     | 0                   |         |
| 98.9707046714173           | 99.9591957019473      |                       |                     |         |
| NFKB2-regulon ASC IgG      | 0.0460042570729513    |                       | -0.0281560336482183 |         |
| 6205179 0.111374141544176  |                       | 0                     | 0                   | 100 100 |
| NFYA-regulon ASC IgG       | 0.0106213290787583    |                       | -0.0106227517153387 |         |
| 12217295 0.219283076703662 |                       | 1.77464553830362e-254 |                     |         |
| 3.99999470538276e-254      | 96.9121140142518      | 99.0773694829189      |                     |         |
| NFYB-regulon ASC IgG       | 0.0942174523063235    |                       | -0.0148199441748659 |         |
| 15514095.5                 | 0.278455958828402     |                       |                     |         |
| 2.74863528755248e-159      | 4.75983183942014e-159 | 100                   | 100                 |         |
| NFYC-regulon ASC IgG       |                       |                       |                     |         |
| 0.0770358677830578         | -0.00668494024857011  |                       | 20248735            |         |
| 0.363436006919464          | 1.02990322734236e-61  |                       |                     |         |
| 1.47723493214763e-61       | 100                   | 100                   |                     |         |
| NR1H3-regulon ASC IgG      |                       |                       |                     |         |
| 0.0034531342174493         | -0.00522673550491385  |                       | 24807540            |         |
| 0.44526007570818           | 5.70179837302075e-20  | 6.58256397535729e-20  |                     |         |
| 12.0348376880443           | 22.3924920091583      |                       |                     |         |
| NR2C2-regulon ASC IgG      | 0.00803675855302943   |                       | -0.0141430694964261 |         |
| 15884796 0.285109505802228 |                       | 4.60422004153336e-152 |                     |         |
| 7.60231681276438e-152      | 49.4061757719715      | 76.7392832044975      |                     |         |
| NR3C1-regulon ASC IgG      | 0.181739424861183     |                       | -0.0449904284545342 |         |
| 1740990 0.0312482954459485 |                       | 0                     | 0                   | 100 100 |
| NRF1-regulon ASC IgG       | 0.0164247159629372    |                       | -0.0105994768676521 |         |
| 11969451.5                 | 0.214834638221903     |                       |                     |         |
| 1.54414353695612e-262      | 3.59456364340605e-262 | 99.8416468725257      |                     |         |
| 99.9705302291841           |                       |                       |                     |         |
| PAX5-regulon ASC IgG       | 0.0698509716605271    |                       | -0.0312875686184946 |         |
| 5388927 0.0967235785574006 |                       | 0                     | 0                   | 100 100 |
| POU2F1-regulon ASC IgG     |                       |                       |                     |         |
| 0.0030467452223774         | -0.00188572304903557  |                       | 26788996            |         |
| 0.480824393999008          | 0.00056393580607591   |                       |                     |         |
| 0.000597603615393875       | 14.9643705463183      | 18.4435427198332      |                     |         |
| POU6F1-regulon ASC IgG     | 0.0877868152319009    |                       | 0.0584104885908424  |         |
| 46708973 0.838359662192678 |                       | 0                     | 0                   |         |
| 94.9326999208234           | 64.5070614104686      |                       |                     |         |
| REL-regulon ASC IgG        | 0.213245786073431     |                       | -0.0519110944002524 |         |
| 2019530 0.0362476924634584 |                       | 0                     | 0                   | 100 100 |

|                       |                       |                       |                     |
|-----------------------|-----------------------|-----------------------|---------------------|
| RELA-regulon          | ASC IgG               | 0.0817688246289306    | -0.0105904115825824 |
| 13264477              | 0.238078504892038     | 8.13897504842065e-222 |                     |
| 1.60518674566074e-221 | 100                   | 100                   |                     |
| RELB-regulon          | ASC IgG               | 0.080521792477155     | -0.0253679811938433 |
| 4676059.5             | 0.0839286203704985    | 0                     | 0 100               |
| 100                   |                       |                       |                     |
| REST-regulon          | ASC IgG               | 0.199023543599544     | -0.0201559511892134 |
| 7909987               | 0.141973021527758     | 0                     | 0 100 100           |
| RFX5-regulon          | ASC IgG               | 0.0511385661415943    | -0.0146167524567361 |
| 13152664              | 0.236071620499423     | 3.39520183867272e-225 |                     |
| 6.98722697234095e-225 | 100                   | 100                   |                     |
| RXRA-regulon          | ASC IgG               |                       |                     |
| 0.0110424720876027    | -0.00358752211984039  | 25066422              |                     |
| 0.449906639572211     | 4.84091836975781e-10  |                       |                     |
| 5.37039381645007e-10  | 60.5700712589074      | 64.3687801781788      |                     |
| SETDB1-regulon        | ASC IgG               | 0.0474201860357993    | -0.0126494262429307 |
| 19570440              | 0.351261575958052     | 7.15070554952211e-73  |                     |
| 1.05770852920015e-72  | 92.6365795724465      | 95.1216194772516      |                     |
| SOX5-regulon          | ASC IgG               |                       |                     |
| 0.00365880864049794   | -0.00426315597950448  | 25120069              |                     |
| 0.450869526955704     | 3.41326318441723e-16  |                       |                     |
| 3.84669343005751e-16  | 13.5391923990499      | 22.7506630698434      |                     |
| SP1-regulon           | ASC IgG               |                       |                     |
| 0.00582872572224317   | -0.00737029347289584  | 20278546              |                     |
| 0.363971071989073     | 2.29498728420522e-65  |                       |                     |
| 3.35967210677465e-65  | 40.3008709422011      | 60.3812934962483      |                     |
| SP2-regulon           | ASC IgG               | 0.0371669018364665    | 0.00918232655514619 |
| 43006128.5            | 0.771898867514705     |                       |                     |
| 7.14343529323558e-239 | 1.53692092672644e-238 | 100                   | 100                 |
| SP3-regulon           | ASC IgG               |                       |                     |
| 0.0279613313081796    | -0.000317403644662272 | 27196259              |                     |
| 0.488134185869267     | 0.149780699989062     | 0.154122169553963     |                     |
| 100                   | 100                   |                       |                     |
| SP4-regulon           | ASC IgG               |                       |                     |
| 0.00358874504794808   | -0.00519374239772433  | 23699079.5            |                     |
| 0.425364785560527     | 1.25624550597371e-29  | 1.5786447951174e-29   |                     |
| 15.2810768012668      | 29.4085643687802      |                       |                     |
| SPI1-regulon          | ASC IgG               | 0.356654219090561     | -0.0636606966262636 |
| 4491822.5             | 0.0806218281384494    | 0                     | 0 100               |
| 100                   |                       |                       |                     |
| SPIB-regulon          | ASC IgG               | 0.504051129714633     | -0.0621294062990844 |
| 4178871               | 0.0750047936165666    | 0                     | 0 100 100           |
| SREBF1-regulon        | ASC IgG               |                       |                     |
| 0.0312453240751917    | -0.00996183469667878  | 19215311              |                     |
| 0.344887515272221     | 4.42771688711324e-79  |                       |                     |
| 6.61827155757978e-79  | 97.070467141726       | 96.8898057262032      |                     |
| SREBF2-regulon        | ASC IgG               | 0.0816198911670267    | -0.0178598558031826 |
| 7337276.5             | 0.13169368223862      | 0                     | 0 100 100           |
| SRF-regulon           | ASC IgG               | 0.0121007174242836    | -0.0089166455140273 |
| 15624252              | 0.280433111400957     | 1.70592638152059e-156 |                     |

|                        |                       |                       |           |
|------------------------|-----------------------|-----------------------|-----------|
| 2.88382793066576e-156  | 95.0910530482977      | 98.0164577335479      |           |
| STAT1-regulon ASC IgG  | 0.109533088362021     | 0.0306167682219218    |           |
| 52271225               | 0.93819417809502      | 0                     | 100 100   |
| STAT2-regulon ASC IgG  | 0.0854600725952632    | 0.0197761697853046    |           |
| 40015510               | 0.718221517010613     | 1.31947096064979e-154 |           |
| 2.20429266367377e-154  | 99.9208234362629      | 99.963729512842       |           |
| STAT5A-regulon ASC IgG |                       |                       |           |
| 0.0632993615009093     | -0.00854634669740899  | 21074751.5            |           |
| 0.378261828799675      | 2.0633549804522e-49   |                       |           |
| 2.73828417966554e-49   | 100                   | 100                   |           |
| TBP-regulon ASC IgG    |                       |                       |           |
| 0.0117227734572639     | -0.00944128133664718  | 22409156.5            |           |
| 0.402212501511495      | 6.26032083981787e-37  |                       |           |
| 8.08150508412853e-37   | 33.3333333333333      | 50.3593045134087      |           |
| TCF12-regulon ASC IgG  |                       |                       |           |
| 0.00736636131777228    | -0.00172537628916426  | 26987103              |           |
| 0.484380133012966      | 0.0129324132519346    | 0.0136029828279609    |           |
| 22.6444972288203       | 25.2941309817967      |                       |           |
| TFDP1-regulon ASC IgG  | 0.468100919955296     | -0.0617820293557516   |           |
| 5483059.5              | 0.0984131231102503    | 0                     | 0 100     |
| 100                    |                       |                       |           |
| TFDP2-regulon ASC IgG  | 0.0319005047993006    | 0.0049141314936739    |           |
| 37718607               | 0.676995373520595     | 2.18701658593122e-102 |           |
| 3.37561255654602e-102  | 100                   | 99.9954661891053      |           |
| TFEC-regulon ASC IgG   | 0.0679797423209247    | -0.0242364014244788   |           |
| 10764078               | 0.193199897499259     | 1.52093170515879e-303 |           |
| 4.07494909684053e-303  | 100                   | 100                   |           |
| THAP1-regulon ASC IgG  |                       |                       |           |
| 0.0317305103669565     | -0.00559020086562922  | 17013723.5            |           |
| 0.305372149503258      | 2.15876130288414e-123 |                       |           |
| 3.44431578662414e-123  | 100                   | 100                   |           |
| THAP11-regulon ASC IgG | 0.168527861111093     | -0.0102347231096028   |           |
| 15424464               | 0.276847200826769     | 1.40310585132488e-161 |           |
| 2.45976581343373e-161  | 100                   | 100                   |           |
| TP53-regulon ASC IgG   | 0.0819996218705949    | -0.016825389839392    |           |
| 14540567.5             | 0.260982515230849     | 4.556986811734e-185   |           |
| 8.40379386060036e-185  | 100                   | 100                   |           |
| USF2-regulon ASC IgG   | 0.109780481936975     | -0.0159496677777073   |           |
| 10052440               | 0.180427007089455     | 0                     | 0 100 100 |
| XBP1-regulon ASC IgG   | 0.361186663236969     | 0.170646590405572     |           |
| 55201996.5             | 0.990797360029762     | 0                     | 0 100     |
| 100                    |                       |                       |           |
| YBX1-regulon ASC IgG   |                       |                       |           |
| 0.0897666926364585     | -0.00557216555137399  | 19111791              |           |
| 0.343029478439979      | 6.14002388237816e-81  |                       |           |
| 9.27535522657127e-81   | 100                   | 100                   |           |
| YY1-regulon ASC IgG    | 0.564783464851753     | -0.0768262568695265   |           |
| 4261580.5              | 0.0764893115587642    | 0                     | 0 100     |
| 100                    |                       |                       |           |
| YY2-regulon ASC IgG    | 0.0174146500309007    | -0.0345490485115602   |           |

|                       |         |                       |                       |                     |         |
|-----------------------|---------|-----------------------|-----------------------|---------------------|---------|
| 10949029.5            |         | 0.196519513990549     |                       |                     |         |
| 2.6169589664851e-297  |         | 6.63586023644435e-297 |                       | 63.341250989707     |         |
| 91.3086845147689      |         |                       |                       |                     |         |
| ZBTB33-regulon        | ASC IgG | 0.32742991412107      | -0.0394954189711232   |                     |         |
| 7210825.5             |         | 0.129424066555913     | 0                     | 0                   | 100 100 |
| ZNF143-regulon        | ASC IgG |                       |                       |                     |         |
| 0.0210995595493503    |         | -0.00229505713086858  |                       | 23424603            |         |
| 0.420438322591199     |         | 4.57186533605947e-22  |                       |                     |         |
| 5.36532956793756e-22  |         | 100                   | 99.9931992836579      |                     |         |
| ZNF274-regulon        | ASC IgG | 0.0763114882872051    | 0.011284038534801     |                     |         |
| 39056028.5            |         | 0.70100018811905      | 1.79597149267580e-131 |                     |         |
| 2.93135576965475e-131 |         | 100                   | 100                   |                     |         |
| ZNF76-regulon         | ASC IgG |                       |                       |                     |         |
| 0.0114221815108206    |         | -0.00322468123065279  |                       | 20858337.5          |         |
| 0.374377505161607     |         | 1.68637430554937e-52  |                       |                     |         |
| 2.32490438240787e-52  |         | 98.9707046714173      | 99.4740779362093      |                     |         |
| ATF1-regulon          | ASC IgM | 0.0883769994901334    | -0.0179829183761072   |                     |         |
| 2351210.5             |         | 0.154907652405172     |                       |                     |         |
| 5.79849061046156e-106 |         | 5.14616041678463e-105 | 100                   | 100                 |         |
| ATF3-regulon          | ASC IgM | 0.0388696781865659    | -0.0122430298091073   |                     |         |
| 3972826.5             |         | 0.261746545674263     |                       |                     |         |
| 1.75788049075795e-51  |         | 6.40048794070845e-51  | 100                   | 100                 |         |
| ATF4-regulon          | ASC IgM |                       |                       |                     |         |
| 0.101778632767131     |         | -0.00702518463829781  |                       | 6023742             |         |
| 0.396869498462361     |         | 6.41008648941579e-11  |                       |                     |         |
| 9.68332214358556e-11  |         | 100                   | 100                   |                     |         |
| ATF5-regulon          | ASC IgM | 0.130627032523787     | 0.0122848283599058    |                     |         |
| 9316137.5             |         | 0.61378638348578      | 5.63833764541614e-13  |                     |         |
| 8.89604384054547e-13  |         | 100                   | 99.997779702036       |                     |         |
| ATF6-regulon          | ASC IgM | 0.240636297073781     | 0.105002185308303     |                     |         |
| 14527897              |         | 0.957159054305919     | 1.90360167212425e-184 |                     |         |
| 9.01038124805479e-183 |         | 100                   | 100                   |                     |         |
| ATF6B-regulon         | ASC IgM |                       |                       |                     |         |
| 0.0560371892002155    |         | -0.00126874497258444  |                       | 5847940.828125      |         |
| 0.385286976682523     |         | 3.6429695486528e-13   |                       | 5.8784281353261e-13 |         |
| 99.7032640949555      |         | 99.9222895712605      |                       |                     |         |
| BACH1-regulon         | ASC IgM | 0.044418905609399     | 0.00114457024473204   |                     |         |
| 7849084.5             |         | 0.517130751765878     | 0.277780097799305     |                     |         |
| 0.29003510211398      |         | 99.406528189911       | 99.5648215990586      |                     |         |
| BATF-regulon          | ASC IgM |                       |                       |                     |         |
| 0.0109265075047833    |         | -0.00842944992080871  |                       | 6481559.5           |         |
| 0.427032443955759     |         | 9.23392850785314e-07  |                       |                     |         |
| 1.18127734064428e-06  |         | 41.839762611276       | 51.7906703079553      |                     |         |
| BATF3-regulon         | ASC IgM |                       |                       |                     |         |
| 0.0733692853235033    |         | -0.00986761474497187  |                       | 6740777.5           |         |
| 0.444110817772635     |         | 0.000398815271180797  |                       |                     |         |
| 0.000488204900928217  |         | 100                   | 100                   |                     |         |
| BCL11A-regulon        | ASC IgM | 0.169761013322454     | -0.0349992520056701   |                     |         |
| 2392987.5             |         | 0.157660097154178     |                       |                     |         |
| 2.6058816665854e-104  |         | 2.1766776273831e-103  | 100                   | 100                 |         |



|                       |                      |                       |                       |                     |
|-----------------------|----------------------|-----------------------|-----------------------|---------------------|
| BHLHE40-regulon       | ASC IgM              | 0.040413682858243     |                       | -0.0153515065858686 |
| 3549706               | 0.233869584704796    |                       | 8.74933138319376e-64  |                     |
| 4.28415536694315e-63  | 100                  | 100                   |                       |                     |
| BRF2-regulon          | ASC IgM              | 0.0438948441058869    |                       | 0.00229958744839617 |
| 8195320.5             | 0.539942237993146    |                       | 0.0113885367587101    |                     |
| 0.0130417114494906    | 100                  | 99.7269033504296      |                       |                     |
| CEBPB-regulon         | ASC IgM              | 0.144305344826815     |                       | 0.00122240224750411 |
| 8180746.5             | 0.538982041478987    |                       | 0.0135221966334391    |                     |
| 0.0153612153755868    | 100                  | 100                   |                       |                     |
| CEBPG-regulon         | ASC IgM              |                       |                       |                     |
| 0.0658504568512045    | -0.00222681507505507 |                       | 7576586               |                     |
| 0.499177402663817     | 0.958438091229891    |                       | 0.965235524501025     |                     |
| 100                   | 100                  |                       |                       |                     |
| CLOCK-regulon         | ASC IgM              |                       |                       |                     |
| 0.0134906014521102    | -0.00211986965058164 |                       | 7171404.5             |                     |
| 0.472482338583844     | 0.0635572864099739   |                       | 0.0683722323501234    |                     |
| 48.0712166172107      | 51.1156997269034     |                       |                       |                     |
| CREB1-regulon         | ASC IgM              |                       |                       |                     |
| 0.0338374669758388    | -0.00920207166251366 |                       | 4998127               |                     |
| 0.329297661775884     | 2.92695480969795e-27 |                       |                       |                     |
| 6.02358815908853e-27  | 100                  | 99.993339106108       |                       |                     |
| CREB3-regulon         | ASC IgM              | 0.350278924403021     |                       | 0.111305558743188   |
| 14312065              | 0.942939132936091    |                       | 2.81312170448034e-173 |                     |
| 9.98658205090522e-172 | 100                  | 100                   |                       |                     |
| CREB3L2-regulon       | ASC IgM              | 0.228701458056705     |                       | 0.102686893674153   |
| 14616861.5            | 0.9630204103361      | 3.74170211306982e-189 |                       |                     |
| 2.65660850027957e-187 | 100                  | 100                   |                       |                     |
| CREB3L4-regulon       | ASC IgM              | 0.0111623636330126    |                       |                     |
| 6.14755877951234e-05  | 7988029.5            | 0.526285033682974     |                       |                     |
| 0.0428883283393441    | 0.0464896383525715   |                       | 38.2789317507418      |                     |
| 31.2950998023935      |                      |                       |                       |                     |
| CREB5-regulon         | ASC IgM              | 0.0235329305766098    |                       | -0.0157584172992397 |
| 4140053.5             | 0.272764164891581    |                       |                       |                     |
| 5.43809364047124e-47  | 1.71602065988204e-46 |                       | 99.1097922848665      |                     |
| 99.6269899420502      |                      |                       |                       |                     |
| CREM-regulon          | ASC IgM              | 0.166762635206882     |                       | 0.0168885052911347  |
| 11887325              | 0.783187047321929    |                       | 5.60648085505232e-72  |                     |
| 3.46139252790187e-71  | 100                  | 100                   |                       |                     |
| CTCF-regulon          | ASC IgM              | 0.333543863450318     |                       | -0.0375754548930483 |
| 3036957               | 0.200087520587993    |                       | 1.67313972252743e-80  |                     |
| 1.07993563908589e-79  | 100                  | 100                   |                       |                     |
| CUX1-regulon          | ASC IgM              |                       |                       |                     |
| 0.0709733777576467    | -0.00576752218361842 |                       | 6107048.5             |                     |
| 0.402358081617758     | 6.16637884201076e-10 |                       |                       |                     |
| 8.93495709760743e-10  | 100                  | 100                   |                       |                     |
| DDIT3-regulon         | ASC IgM              | 0.0877383359117061    |                       | 0.00285138545998496 |
| 8079347.5             | 0.532301448207465    |                       | 0.0407109720147036    |                     |
| 0.0448136281092087    | 100                  | 100                   |                       |                     |
| E2F1-regulon          | ASC IgM              | 0.423006842296007     |                       | -0.0147979885563905 |
| 6788881.5             | 0.447280111934642    |                       |                       |                     |

|                      |                      |                      |                      |
|----------------------|----------------------|----------------------|----------------------|
| 0.000837556684453436 | 0.000991108743269899 | 100                  | 100                  |
| E2F2-regulon         | ASC IgM              | 0.0453474934963445   | -0.0086376487463195  |
| 4159590              | 0.274051311810674    | 1.76325131983911e-46 |                      |
| 5.44308016124248e-46 | 100                  | 100                  |                      |
| E2F3-regulon         | ASC IgM              | 0.01499394342857     | -0.00616716140796663 |
| 4186103              | 0.27579809993884     | 8.61007487419767e-46 |                      |
| 2.60134177050228e-45 | 100                  | 100                  |                      |
| E2F4-regulon         | ASC IgM              | 0.386979989901663    | -0.0117649078407812  |
| 7334680.5            | 0.483239649277253    | 0.288302531567107    |                      |
| 0.298824521770287    | 100                  | 100                  |                      |
| E2F6-regulon         | ASC IgM              |                      |                      |
| 0.0640566424153489   | -0.00840701444128555 | 7070641              |                      |
| 0.465843614729417    | 0.0304657707588075   | 0.034064090139769    |                      |
| 100                  | 100                  |                      |                      |
| E2F7-regulon         | ASC IgM              |                      |                      |
| 0.0213152715562028   | -0.00932803343991598 | 3401616              |                      |
| 0.224112791663644    | 2.07539405443113e-68 |                      |                      |
| 1.13348444511239e-67 | 100                  | 100                  |                      |
| E2F8-regulon         | ASC IgM              | 0.0579595716416163   | -0.0169630206975483  |
| 2738374.5            | 0.180415647684964    |                      |                      |
| 3.75110025952277e-91 | 2.95920131584574e-90 | 100                  | 100                  |
| EGR1-regulon         | ASC IgM              | 0.0545127511899376   | 0.00710249207610044  |
| 10349223             | 0.681850408182345    | 1.03210439086818e-30 |                      |
| 2.15527681622473e-30 | 100                  | 100                  |                      |
| EGR2-regulon         | ASC IgM              | 0.0479048834921213   | 0.00187086940503135  |
| 7944652              | 0.523427141251733    | 0.137748327441219    |                      |
| 0.145972108183978    | 100                  | 99.995559404072      |                      |
| EGR3-regulon         | ASC IgM              |                      |                      |
| 0.0363389714222303   | -0.00517057243795163 | 6152998.5            |                      |
| 0.405385461185864    | 2.04341015829819e-09 |                      |                      |
| 2.87291329186478e-09 | 100                  | 99.995559404072      |                      |
| ELF1-regulon         | ASC IgM              | 0.671177353201987    | -0.0361356604376875  |
| 4588427              | 0.302304899881362    | 5.44883385754927e-36 |                      |
| 1.31141425046101e-35 | 100                  | 100                  |                      |
| ELF2-regulon         | ASC IgM              | 0.0192682534055096   | -0.0134879816130201  |
| 4135685.5            | 0.272476382651027    | 4.1766975265087e-47  |                      |
| 1.3479342017369e-46  | 99.406528189911      | 99.5359577255268     |                      |
| ELF4-regulon         | ASC IgM              |                      |                      |
| 0.0114909674669331   | -0.00700818303548404 | 4624030              |                      |
| 0.304650575501891    | 3.50624007164434e-35 |                      |                      |
| 8.03042080924994e-35 | 97.3293768545994     | 98.3436577188659     |                      |
| ELK1-regulon         | ASC IgM              |                      |                      |
| 0.0615332257154975   | -0.00455557913999875 | 6149063.5            |                      |
| 0.405126206809357    | 1.84674384320244e-09 |                      |                      |
| 2.62237625734747e-09 | 100                  | 100                  |                      |
| ELK3-regulon         | ASC IgM              | 0.0803655363879577   | 0.0155757588616082   |
| 11147231             | 0.734426536895851    | 6.73918791092528e-50 |                      |
| 2.33406020329607e-49 | 100                  | 100                  |                      |
| ELK4-regulon         | ASC IgM              | 0.0282214086605778   | -0.0169011466928441  |
| 4681284.5            | 0.308422743151122    |                      |                      |

|                       |                      |                       |                     |
|-----------------------|----------------------|-----------------------|---------------------|
| 6.67385080207399e-34  | 1.48076064671017e-33 | 91.0979228486647      |                     |
| 96.7716867603632      |                      |                       |                     |
| ESRRA-regulon         | ASC IgM              |                       |                     |
| 0.0915384133155673    | -0.00019878853275021 | 8789388.5             |                     |
| 0.57908194039284      | 5.43600457779273e-07 | 7.08176743161989e-07  | 100                 |
| 100                   |                      |                       |                     |
| ETS1-regulon          | ASC IgM              | 0.243817830232737     |                     |
| 0.000885400130914288  | 7597188              | 0.500534749211415     |                     |
| 0.972975202426225     | 0.972975202426225    | 100                   | 100                 |
| ETV2-regulon          | ASC IgM              |                       |                     |
| 0.0249087468700281    | -0.00372091350171883 | 5967055               |                     |
| 0.39313472010377      | 1.28368136701618e-11 | 1.96002961415374e-11  | 100                 |
| 100                   |                      |                       |                     |
| ETV3-regulon          | ASC IgM              | 0.00689875243911196   | -0.0045642006718539 |
| 5485856               | 0.361431302893905    | 1.41879413393012e-18  |                     |
| 2.37022078844796e-18  | 74.4807121661721     | 84.4223894846688      |                     |
| ETV5-regulon          | ASC IgM              |                       |                     |
| 0.0309152980494518    | -0.00256741187359575 | 6273934               |                     |
| 0.413353201376479     | 4.0302617288432e-08  |                       |                     |
| 5.45044919519747e-08  | 100                  | 100                   |                     |
| ETV6-regulon          | ASC IgM              | 0.417622232237861     | -0.0422665696288673 |
| 2093921               | 0.137956336292259    | 1.97139463668228e-116 |                     |
| 2.3328169867407e-115  | 100                  | 100                   |                     |
| ETV7-regulon          | ASC IgM              | 0.100323116803205     | 0.0365182523015273  |
| 13569942              | 0.894044943442686    | 1.47569849693006e-137 |                     |
| 2.32832429515632e-136 | 100                  | 100                   |                     |
| FLI1-regulon          | ASC IgM              | 0.130915780752945     | -0.013113123817104  |
| 5158741               | 0.339879588695402    | 3.50735462719498e-24  |                     |
| 6.46810853326867e-24  | 100                  | 100                   |                     |
| FOS-regulon           | ASC IgM              | 0.126664271208513     | 0.0406889365400767  |
| 12955673              | 0.853574314064639    | 3.86935789652744e-111 |                     |
| 3.92463443790641e-110 | 100                  | 100                   |                     |
| FOSB-regulon          | ASC IgM              | 0.0533263521385505    | 0.0119415581896191  |
| 9724162.5             | 0.640668789324228    |                       |                     |
| 5.00774265643878e-19  | 8.5674633399314e-19  | 99.7032640949555      |                     |
| 99.32058882302        |                      |                       |                     |
| FOSL1-regulon         | ASC IgM              | 0.0502892603207204    | -0.0105830448272803 |
| 5859879.5             | 0.386073546678273    |                       |                     |
| 5.28245975827217e-13  | 8.42819422106346e-13 | 100                   | 100                 |
| FOX01-regulon         | ASC IgM              | 0.00546997483744364   | -0.0113110152834818 |
| 5320754.5             | 0.350553720570428    |                       |                     |
| 1.16742929290606e-23  | 2.09841721003367e-23 | 27.5964391691395      |                     |
| 52.5278092319989      |                      |                       |                     |
| FOX03-regulon         | ASC IgM              | 0.034460233243096     | 0.0148264340167319  |
| 9154499.5             | 0.603136991132578    |                       |                     |
| 1.32976268004591e-12  | 2.07501429193977e-12 | 61.1275964391691      |                     |
| 46.6529008192899      |                      |                       |                     |
| GABPA-regulon         | ASC IgM              |                       |                     |
| 0.017817495113766     | -0.00772782516399374 | 3864275               |                     |
| 0.254594715572254     | 1.64944600664831e-54 |                       |                     |

|                       |                      |                       |                     |  |
|-----------------------|----------------------|-----------------------|---------------------|--|
| 6.33030629578541e-54  | 100                  | 100                   |                     |  |
| GTF2B-regulon         | ASC IgM              | 0.103646686133706     | 0.0247736956678461  |  |
| 11858642              | 0.781297290452462    | 4.80118951949396e-71  |                     |  |
| 2.84070379903392e-70  | 100                  | 100                   |                     |  |
| HINFP-regulon         | ASC IgM              | 0.0199406344367142    | 0.00373784871731076 |  |
| 8406288               | 0.553841665610872    | 0.000466644003674435  |                     |  |
| 0.000566354260869827  | 70.6231454005935     | 63.1785785652435      |                     |  |
| HIVEP3-regulon        | ASC IgM              |                       |                     |  |
| 0.0708789841036898    | -0.00685993090480215 | 6637662.5             |                     |  |
| 0.437317167192324     | 7.14876048511714e-05 | 8.9045963937424e-05   |                     |  |
| 99.406528189911       | 99.6958191789338     |                       |                     |  |
| H0XB2-regulon         | ASC IgM              | 0.0692247443216763    | 0.0323623697311023  |  |
| 10628250.5            | 0.700233915308348    |                       |                     |  |
| 4.99074003503483e-37  | 1.24330716662271e-36 | 94.0652818991098      |                     |  |
| 83.6519460911654      |                      |                       |                     |  |
| IKZF1-regulon         | ASC IgM              |                       |                     |  |
| 0.136577177821397     | -0.00734147918616296 | 5428795.5             |                     |  |
| 0.357671916781915     | 1.92926760843862e-19 |                       |                     |  |
| 3.38217284442326e-19  | 100                  | 100                   |                     |  |
| IRF1-regulon          | ASC IgM              | 0.203133814791234     | 0.0681978651734658  |  |
| 13378547              | 0.881435034575705    | 5.08444035944958e-129 |                     |  |
| 7.21990531041841e-128 | 100                  | 100                   |                     |  |
| IRF2-regulon          | ASC IgM              | 0.0964644172568767    | 0.0115296244265737  |  |
| 9712430               | 0.639895802800119    | 7.78055244672991e-19  |                     |  |
| 1.31528386599482e-18  | 100                  | 100                   |                     |  |
| IRF3-regulon          | ASC IgM              | 0.173587778324251     | 0.0283518137106509  |  |
| 12920969              | 0.851287868351221    | 9.88882895016098e-110 |                     |  |
| 9.36142473948573e-109 | 100                  | 100                   |                     |  |
| IRF4-regulon          | ASC IgM              | 0.105593606001575     | 0.0475342851633832  |  |
| 13700133              | 0.902622474962846    | 1.59814353840387e-143 |                     |  |
| 3.24194832076213e-142 | 100                  | 99.995559404072       |                     |  |
| IRF5-regulon          | ASC IgM              | 0.0140518507933039    | -0.0332397718142159 |  |
| 3606518               | 0.237612598589959    | 1.6632430376879e-62   |                     |  |
| 7.87268371172271e-62  | 51.6320474777448     | 80.6945092031351      |                     |  |
| IRF7-regulon          | ASC IgM              | 0.157065827781561     | 0.0495994997955399  |  |
| 13649754              | 0.899303294217217    | 3.3666142361844e-141  |                     |  |
| 5.97574026922731e-140 | 100                  | 100                   |                     |  |
| IRF8-regulon          | ASC IgM              | 0.0633824587057562    | -0.018528070815502  |  |
| 3834882.5             | 0.252658213853961    |                       |                     |  |
| 2.41138643107818e-55  | 9.51157981147505e-55 | 100                   | 100                 |  |
| IRF9-regulon          | ASC IgM              | 0.0371221440590664    | 0.00322991093745128 |  |
| 8808062               | 0.580312229236475    | 3.6149154432083e-07   |                     |  |
| 4.75294437903314e-07  | 100                  | 100                   |                     |  |
| JUN-regulon           | ASC IgM              | 0.0917934710307148    | 0.00341857689528387 |  |
| 8312209.5             | 0.547643377717551    | 0.00254069506079102   |                     |  |
| 0.00298164213745723   | 100                  | 100                   |                     |  |
| JUNB-regulon          | ASC IgM              |                       |                     |  |
| 0.153718568559394     | -0.00610929491913675 | 6240613.5             |                     |  |
| 0.411157906471167     | 1.81674164392074e-08 |                       |                     |  |
| 2.48055109073794e-08  | 100                  | 100                   |                     |  |

|                       |                      |                       |                       |
|-----------------------|----------------------|-----------------------|-----------------------|
| JUND-regulon          | ASC IgM              | 0.0291957331869404    | -0.0093312562491743   |
| 4242855.5             |                      | 0.279537193713355     |                       |
| 2.46265745068983e-44  |                      | 6.99394715995912e-44  | 100 100               |
| KLF11-regulon         | ASC IgM              | 0.0096501930540702    | -0.0123782258331793   |
| 6347433.5             |                      | 0.418195658059092     |                       |
| 5.90361146850906e-09  |                      | 8.21875322086555e-09  | 28.7833827893175      |
| 40.9489553498079      |                      |                       |                       |
| KLF12-regulon         | ASC IgM              |                       |                       |
| 0.0463529054168533    |                      | -0.000701932564940375 | 7419048.5             |
| 0.488798168524305     |                      | 0.477894620830668     | 0.491746638825759     |
| 99.406528189911       |                      | 98.5967716867604      |                       |
| KLF13-regulon         | ASC IgM              | 0.115147936746221     | 0.0492213971159021    |
| 14305654.5            |                      | 0.942516782191339     |                       |
| 5.96426123509651e-173 |                      | 1.69385019076741e-171 | 100 100               |
| KLF2-regulon          | ASC IgM              | 0.0884709864552091    | -0.0205298524243679   |
| 3787557               | 0.249540210551449    | 1.05685305143909e-56  |                       |
| 4.41391568542207e-56  | 100 100              |                       |                       |
| KLF3-regulon          | ASC IgM              | 0.0458911573205367    | -0.0263336354644217   |
| 4089145               | 0.269410098455391    | 2.45885123683676e-48  |                       |
| 8.31325894359094e-48  | 100 99.8623415262328 |                       |                       |
| KLF4-regulon          | ASC IgM              | 0.0240144908552611    | 0.00817541669463265   |
| 9163557               | 0.603733737388032    | 2.04319565012957e-12  |                       |
| 3.15362806867825e-12  | 67.0623145400593     | 49.6836075401319      |                       |
| KLF6-regulon          | ASC IgM              | 0.0454366350260414    | -0.0241223949694327   |
| 3382456.5             |                      | 0.222850483092695     |                       |
| 5.08937229187836e-69  |                      | 2.89076346178691e-68  | 100 100               |
| KLF7-regulon          | ASC IgM              | 0.024340434847789     | -0.0218203592732038   |
| 3767774.5             |                      | 0.248236856116061     |                       |
| 2.82119905537786e-57  |                      | 1.21397050261714e-56  | 95.2522255192878      |
| 97.5732143253625      |                      |                       |                       |
| KLF8-regulon          | ASC IgM              | 0.011818712115448     | -0.0133874378514649   |
| 5090392               | 0.335376468649689    | 9.74859151467178e-26  |                       |
| 1.89630136312794e-25  | 62.9080118694362     | 77.7459535069606      |                       |
| MAFB-regulon          | ASC IgM              | 0.0577463778755895    | 0.0019781639922568    |
| 8405870.5             |                      | 0.553814158952119     |                       |
| 0.000651049622179684  |                      | 0.0007768827424329    | 100                   |
| 99.997779702036       |                      |                       |                       |
| MAFF-regulon          | ASC IgM              |                       |                       |
| 0.00523446822683142   |                      | -0.00720599025054735  | 6655270               |
| 0.438477223465348     |                      | 1.00483762694359e-06  |                       |
| 1.27399056273206e-06  |                      | 17.8041543026706      | 28.6263016496814      |
| MAFG-regulon          | ASC IgM              | 0.0287759302441775    | 0.0033937826371874    |
| 8235655.5             |                      | 0.542599677707609     | 0.00510917823358186   |
| 0.00594674843580839   |                      | 64.6884272997033      | 58.555918204223       |
| MAX-regulon           | ASC IgM              | 0.17413391791103      | -0.0237124001080216   |
| 1824134.5             |                      | 0.120181665174719     | 6.03639617202229e-128 |
| 7.79243869479241e-127 | 100 100              |                       |                       |
| MAZ-regulon           | ASC IgM              | 0.122369266262283     | -0.0140388107648729   |
| 3688036               | 0.242983347831154    | 1.2961654646039e-59   |                       |
| 5.7517342491798e-59   | 100 100              |                       |                       |

|                       |         |                       |                      |
|-----------------------|---------|-----------------------|----------------------|
| MEF2A-regulon         | ASC IgM |                       |                      |
| 0.0313360084625726    |         | -0.00948877837710699  | 4816090              |
| 0.317304297370238     |         | 5.5354759312489e-31   |                      |
| 1.17319042124977e-30  |         | 100                   | 99.997779702036      |
| MLX-regulon           | ASC IgM |                       |                      |
| 12258035              |         | 0.0803302248409666    | 0.0276098206029531   |
| 9.24994163221956e-84  |         | 1.36794911462402e-84  |                      |
| 9.24994163221956e-84  |         | 100                   | 99.9888985101801     |
| MXD4-regulon          | ASC IgM |                       |                      |
| 14210495.5            |         | 0.488432437987334     | 0.399228310666966    |
| 2.17530038355292e-168 |         | 0.936247306406324     |                      |
| 88.5232798241524      |         | 5.14821090774191e-167 | 99.406528189911      |
| MXI1-regulon          | ASC IgM |                       |                      |
| 2745311.5             |         | 0.0394806967837534    | -0.0259415181278384  |
| 5.04359343220576e-90  |         | 0.18087268646764      | 6.74847008534574e-91 |
| 5.04359343220576e-90  |         | 100                   | 100                  |
| MYBL1-regulon         | ASC IgM |                       |                      |
| 0.0267606245729378    |         | -0.00315301124029694  | 7700713.5            |
| 0.507355445260991     |         | 0.639883423867199     | 0.653693857475844    |
| 85.1632047477745      |         | 80.0217589200471      |                      |
| MYC-regulon           | ASC IgM |                       |                      |
| 6390218.5             |         | 0.290815225271631     | -0.0242466093550776  |
| 5.61129235706792e-07  |         | 0.421014514094379     |                      |
| 5.61129235706792e-07  |         | 7.24366831548768e-07  | 100                  |
| NFATC1-regulon        | ASC IgM |                       |                      |
| 10123153              |         | 0.073265988567623     | 0.0229183572408636   |
| 7.51795223147302e-26  |         | 0.666955964244111     | 3.75897611573651e-26 |
| 7.51795223147302e-26  |         | 99.1097922848665      | 94.795621572415      |
| NFE2L1-regulon        | ASC IgM |                       |                      |
| 0.000330202783516115  |         | 0.182994892962146     |                      |
| 0.0237383126213707    |         | 8130826               | 0.535693068644827    |
| 99.9356113590444      |         | 0.0267527015256718    | 100                  |
| NFE2L2-regulon        | ASC IgM |                       |                      |
| 5167645.5             |         | 0.0977781040631353    | -0.0132004621661211  |
| 9.33661741491685e-24  |         | 0.340466254666332     | 5.1285644955177e-24  |
| 9.33661741491685e-24  |         | 100                   | 100                  |
| NFKB1-regulon         | ASC IgM |                       |                      |
| 3636778.5             |         | 0.0329402511424648    | -0.0239060920747822  |
| 3.83758089872803e-61  |         | 0.239606287804773     |                      |
| 99.9311707631164      |         | 1.75785963748187e-60  | 100                  |
| NFKB2-regulon         | ASC IgM |                       |                      |
| 3876022               |         | 0.0564503379027167    | -0.0170529041184844  |
| 1.32363928781371e-53  |         | 0.255368657417446     | 3.54213330541696e-54 |
| 1.32363928781371e-53  |         | 100                   | 100                  |
| NFYA-regulon          | ASC IgM |                       |                      |
| 0.0135093891144812    |         | -0.00749467870596104  | 4607733              |
| 0.303576860489455     |         | 1.49959156349494e-35  |                      |
| 3.49085249207018e-35  |         | 97.9228486646884      | 99.0252891938098     |
| NFYB-regulon          | ASC IgM |                       |                      |
| 0.100116459956316     |         | -0.00857210031882985  | 6126802.5            |
| 0.403659558353087     |         | 1.03664820300971e-09  |                      |
| 1.48690954371089e-09  |         | 100                   | 100                  |
| NFYC-regulon          | ASC IgM |                       |                      |
| 0.0811865795211023    |         | -0.00236572910943111  | 7205268              |
| 0.474713408616588     |         | 0.109148049072878     | 0.116534007280817    |
| 100                   |         | 100                   |                      |

|                       |                   |     |                       |                     |
|-----------------------|-------------------|-----|-----------------------|---------------------|
| NR1H3-regulon         | ASC               | IgM |                       |                     |
| 0.00334727473259459   |                   |     | -0.00522592560476547  | 6904757             |
| 0.454914478009596     |                   |     | 8.37451352987671e-05  |                     |
| 0.000103407036629782  |                   |     | 14.2433234421365      | 22.1630142765159    |
| NR2C2-regulon         | ASC               | IgM |                       |                     |
| 4237281.5             |                   |     | 0.00750301479974394   | -0.0143900260051273 |
| 4.45636618024241e-45  |                   |     | 0.279169955112427     |                     |
| 76.2050667199538      |                   |     | 1.29143672978454e-44  | 45.6973293768546    |
| NR3C1-regulon         | ASC               | IgM |                       |                     |
| 2809190               | 0.185081271141009 |     | 0.197902611070766     | -0.0277813013825538 |
| 1.02807148318009e-87  | 100               | 100 | 1.447988004479e-88    |                     |
| NRF1-regulon          | ASC               | IgM |                       |                     |
| 0.0186750240011935    |                   |     | -0.00811440630384374  | 4357621             |
| 0.287098428312344     |                   |     | 1.8299568203856e-41   |                     |
| 4.90290317914633e-41  |                   |     | 100                   | 99.9666955305402    |
| PAX5-regulon          | ASC               | IgM |                       |                     |
| 4370266.5             |                   |     | 0.0845665924721093    | -0.0158185684522591 |
| 3.73875947270664e-41  |                   |     | 0.287931567122539     |                     |
| POU2F1-regulon        | ASC               | IgM |                       |                     |
| 0.00223648464179098   |                   |     | 9.83155268748784e-41  | 100                 |
| 0.462983614003373     |                   |     |                       | 100                 |
| 0.000616024847902732  |                   |     | -0.00266327593775303  | 7027231.5           |
| POU6F1-regulon        | ASC               | IgM |                       |                     |
| 11658724.5            |                   |     | 0.000511907972200862  |                     |
| 1.91158501871348e-67  |                   |     | 11.2759643916914      | 18.3996092275583    |
| 65.1546437531917      |                   |     | 0.0688078395982239    | 0.038088587332181   |
| REL-regulon           | ASC               | IgM |                       |                     |
| 2109167.5             |                   |     | 0.768125883383758     |                     |
| 8.49289538184216e-116 |                   |     | 1.00535212095302e-66  | 91.9881305637982    |
| RELA-regulon          | ASC               | IgM |                       |                     |
| 0.084304222306261     |                   |     | 0.228236421154679     | -0.0357410033489111 |
| 0.302594955127251     |                   |     | 0.138960839939379     |                     |
| 1.62538284397684e-35  |                   |     | 9.27685495555067e-115 | 100                 |
| RELB-regulon          | ASC               | IgM |                       |                     |
| 4275231.5             |                   |     | 100                   | 100                 |
| 1.62697884043623e-43  |                   |     | -0.00781830460569541  | 4592829.5           |
| REST-regulon          | ASC               | IgM |                       |                     |
| 0.209774644822874     |                   |     | 6.86781483370494e-36  |                     |
| 0.335883118244439     |                   |     | 100                   | 100                 |
| 4.87637862094442e-25  |                   |     | 0.0921144377012664    | -0.0131670304561542 |
| RFX5-regulon          | ASC               | IgM |                       |                     |
| 0.0555546079603429    |                   |     | 0.281670260979884     |                     |
| 0.338137544230543     |                   |     | 4.53001951650871e-43  | 100                 |
| 2.13159305798561e-24  |                   |     |                       | 100                 |
| RXRA-regulon          | ASC               | IgM |                       |                     |
| 8946631               | 0.589441738689641 |     | 0.0208998936001903    | 0.00641741591249043 |
| 9.1146427251607e-09   |                   |     | 6.61132535698276e-09  |                     |
| SETDB1-regulon        | ASC               | IgM |                       |                     |
| 0.050616814362891     |                   |     | 72.700296735905       | 64.1999156286774    |
| 0.396952413743895     |                   |     | -0.00916880776403309  | 6025000.5           |
|                       |                   |     | 6.6210425189906e-11   |                     |

|                        |                      |                      |     |  |
|------------------------|----------------------|----------------------|-----|--|
| 9.89671618628068e-11   | 94.9554896142433     | 95.0531761362375     |     |  |
| SOX5-regulon ASC IgM   |                      |                      |     |  |
| 0.00454420622079757    | -0.00328348318391183 | 7124174.5            |     |  |
| 0.469370627223633      | 0.00794278829015314  | 0.00916972306668086  |     |  |
| 17.2106824925816       | 22.5338040365017     |                      |     |  |
| SP1-regulon ASC IgM    |                      |                      |     |  |
| 0.00788955005443789    | -0.00514251628748833 | 6098160.5            |     |  |
| 0.401772502736336      | 1.23144517659349e-10 |                      |     |  |
| 1.82151265704453e-10   | 45.1038575667656     | 59.9325029418948     |     |  |
| SP2-regulon ASC IgM    | 0.0346553183932771   | 0.00646316217076322  |     |  |
| 10394521               | 0.684834831243848    | 1.12959070640295e-31 |     |  |
| 2.46772123552645e-31   | 100                  | 100                  |     |  |
| SP3-regulon ASC IgM    | 0.0284616034699164   |                      |     |  |
| 0.000193137561535075   | 7571714.5            | 0.498856447722228    |     |  |
| 0.942245496714174      | 0.955706146667234    | 100                  | 100 |  |
| SP4-regulon ASC IgM    |                      |                      |     |  |
| 0.00329253923549348    | -0.00538538141026118 | 6357137              |     |  |
| 0.418834965515874      | 1.39759262720263e-10 |                      |     |  |
| 2.04596034085333e-10   | 13.353115727003      | 29.1325295854704     |     |  |
| SPI1-regulon ASC IgM   | 0.388484950934774    | -0.0302829330604887  |     |  |
| 4348704.5              | 0.286510971730863    |                      |     |  |
| 1.10391782833999e-41   | 3.01454483892845e-41 | 100                  | 100 |  |
| SPIB-regulon ASC IgM   | 0.541226858170966    | -0.0233981359629862  |     |  |
| 5144975                | 0.338972626625009    | 1.94402319287945e-24 |     |  |
| 3.63225386038003e-24   | 100                  | 100                  |     |  |
| SREBF1-regulon ASC IgM |                      |                      |     |  |
| 0.0322515082654652     | -0.00874330691526768 | 5573670              |     |  |
| 0.367216859137511      | 4.00937922506902e-17 |                      |     |  |
| 6.62013779023024e-17   | 95.5489614243323     | 96.9049046382025     |     |  |
| SREBF2-regulon ASC IgM | 0.0886277381579272   | -0.0104323753632783  |     |  |
| 4126109.5              | 0.271845475431349    |                      |     |  |
| 2.33921862072395e-47   | 7.72486149169306e-47 | 100                  | 100 |  |
| SRF-regulon ASC IgM    |                      |                      |     |  |
| 0.0143209051577684     | -0.00649651957116463 | 5194726.5            |     |  |
| 0.342250465027243      | 1.61438142576413e-23 |                      |     |  |
| 2.86552703073133e-23   | 97.0326409495549     | 97.9417837873843     |     |  |
| STAT1-regulon ASC IgM  | 0.0974498738656476   | 0.0178136627275513   |     |  |
| 11677955.5             | 0.769392902675907    |                      |     |  |
| 2.59364790326231e-65   | 1.31535000808303e-64 | 100                  | 100 |  |
| STAT2-regulon ASC IgM  | 0.0839384328888943   | 0.0178365473128387   |     |  |
| 10639215               | 0.700956302757195    | 3.94570418911227e-37 |     |  |
| 1.00051784795347e-36   | 100                  | 99.9622549346122     |     |  |
| STAT5A-regulon ASC IgM |                      |                      |     |  |
| 0.0647882401828743     | -0.00687061508448136 | 6354863              |     |  |
| 0.418685144816464      | 2.58115961568267e-07 | 3.4577798625183e-07  |     |  |
| 100                    | 100                  |                      |     |  |
| TBP-regulon ASC IgM    | 0.0130968296489564   | -0.007862831542647   |     |  |
| 6649244                | 0.438080205200333    | 2.71835358119575e-05 |     |  |
| 3.41598414628138e-05   | 41.2462908011869     | 49.9500432958103     |     |  |
| TCF12-regulon ASC IgM  |                      |                      |     |  |



|                       |                      |                       |                     |
|-----------------------|----------------------|-----------------------|---------------------|
| 0.00618225174628441   | -0.00288287218099285 | 7218235.5             |                     |
| 0.475567762143235     | 0.0424280787518719   | 0.0463445167905063    |                     |
| 21.0682492581602      | 25.2514487444215     |                       |                     |
| TFDP1-regulon         | ASC IgM              | 0.494473095327819     | -0.0339422907095336 |
| 4447411               | 0.29301417176001     | 2.75144947670653e-39  |                     |
| 7.10374228531505e-39  | 100                  | 100                   |                     |
| TFDP2-regulon         | ASC IgM              | 0.0327047723533541    | 0.00562338255985192 |
| 10377348              | 0.683703401661191    | 2.62413719982296e-31  |                     |
| 5.64587094507364e-31  | 100                  | 99.995559404072       |                     |
| TFEC-regulon          | ASC IgM              | 0.0760661139992432    | -0.015591224822102  |
| 4567656               | 0.300936418901838    | 1.82012604259126e-36  |                     |
| 4.45617065599929e-36  | 100                  | 100                   |                     |
| THAP1-regulon         | ASC IgM              | 0.0323520493565443    | -0.0048490769687152 |
| 5048930.5             | 0.332644810369753    |                       |                     |
| 2.89145149103998e-26  | 5.86551588182396e-26 | 100                   | 100                 |
| THAP11-regulon        | ASC IgM              |                       |                     |
| 0.170646647681681     | -0.00788965743243683 | 5059379.5             |                     |
| 0.333333234507014     | 4.6057413929361e-26  | 9.0835455249573e-26   |                     |
| 100                   | 100                  |                       |                     |
| TP53-regulon          | ASC IgM              |                       |                     |
| 0.0887570977225554    | -0.00967142249442791 | 5645496.5             |                     |
| 0.371949091532475     | 4.95133039198289e-16 |                       |                     |
| 8.08148178921346e-16  | 100                  | 100                   |                     |
| USF2-regulon          | ASC IgM              | 0.116635405730208     | -0.0087155281564042 |
| 4657587               | 0.306861452023479    | 1.98837619387303e-34  |                     |
| 4.48173681793604e-34  | 100                  | 100                   |                     |
| XBP1-regulon          | ASC IgM              | 0.31343516079359      | 0.119029304995454   |
| 14621954              | 0.96335592568867     | 2.00378089580392e-189 |                     |
| 2.65660850027957e-187 | 100                  | 100                   |                     |
| YBX1-regulon          | ASC IgM              |                       |                     |
| 0.0903219826432203    | -0.00489815714427357 | 5433603.5             |                     |
| 0.357988688076005     | 2.3165585786298e-19  |                       |                     |
| 4.01160144104185e-19  | 100                  | 100                   |                     |
| YY1-regulon           | ASC IgM              | 0.601242099314868     | -0.0385152794663985 |
| 4213401.5             | 0.277596640115988    |                       |                     |
| 4.35088013889441e-45  | 1.28713537442293e-44 | 100                   | 100                 |
| YY2-regulon           | ASC IgM              | 0.0239146588756049    | -0.0272900769478265 |
| 4009414.5             | 0.264157117244185    |                       |                     |
| 1.59982379083085e-50  | 5.67937445744951e-50 | 73.8872403560831      |                     |
| 90.6547658695797      |                      |                       |                     |
| ZBTB33-regulon        | ASC IgM              | 0.340884865441482     | -0.0251277680667447 |
| 3822355               | 0.25183284938085     | 1.0576911114357e-55   |                     |
| 4.29120393782484e-55  | 100                  | 100                   |                     |
| ZNF143-regulon        | ASC IgM              |                       |                     |
| 0.0209621163896133    | -0.00238634241502332 | 6359361.5             |                     |
| 0.418981524946761     | 2.85255115380889e-07 |                       |                     |
| 3.78562863402676e-07  | 100                  | 99.993339106108       |                     |
| ZNF274-regulon        | ASC IgM              | 0.0663696593516593    | 0.00103582144599904 |
| 7890410               | 0.519853449792903    | 0.208458068535507     |                     |
| 0.219267005422534     | 100                  | 100                   |                     |

|                      |         |                       |                   |                       |
|----------------------|---------|-----------------------|-------------------|-----------------------|
| ZNF76-regulon        | ASC IgM |                       |                   |                       |
| 0.0135130737396063   |         | -0.00105184478683829  |                   | 7085816.5             |
| 0.466843440597443    |         | 0.0356727869012441    |                   | 0.0395744979685676    |
| 99.406528189911      |         | 99.4604675947512      |                   |                       |
| ATF1-regulon         | B EIF5A | 0.107262018183195     |                   | 0.00109059984857016   |
| 52288738             |         | 0.530829976607995     |                   | 6.49429599793748e-07  |
| 9.31505082532447e-07 |         | 100                   | 100               |                       |
| ATF3-regulon         | B EIF5A | 0.0542854781748648    |                   | 0.00343684197485872   |
| 56468968             |         | 0.573267248532898     |                   | 2.89170442610029e-32  |
| 8.05141232365178e-32 |         | 100                   | 100               |                       |
| ATF4-regulon         | B EIF5A |                       |                   |                       |
| 0.107832511986311    |         | -0.000967892027727277 |                   | 49032719              |
| 0.497775201225862    |         | 0.719536710938601     |                   | 0.729815806809153     |
| 100                  | 100     |                       |                   |                       |
| ATF5-regulon         | B EIF5A |                       |                   |                       |
| 0.111860418892572    |         | -0.00692173301527618  |                   | 42956717              |
| 0.436092243807189    |         | 6.05289589874564e-25  |                   |                       |
| 1.50791441688049e-24 |         | 99.9562554680665      | 100               |                       |
| ATF6-regulon         | B EIF5A | 0.126519312455805     |                   | -0.0104195606851842   |
| 36280357             |         | 0.368314512728146     |                   | 3.03907341214035e-100 |
| 2.53852014425841e-99 |         | 100                   | 100               |                       |
| ATF6B-regulon        | B EIF5A | 0.0598402121205192    |                   | 0.00267864848483335   |
| 54591216.5039062     |         | 0.554204505371129     |                   |                       |
| 2.14925056535399e-18 |         | 4.62414515576162e-18  |                   | 99.912510936133       |
| 99.9210953817591     |         |                       |                   |                       |
| BACH1-regulon        | B EIF5A | 0.0488358619319509    |                   | 0.00584762379541885   |
| 57106277             |         | 0.579737145005865     |                   | 6.68819581988693e-38  |
| 2.06461697048683e-37 |         | 99.9562554680665      | 99.542817359016   |                       |
| BATF-regulon         | B EIF5A | 0.019925807688535     |                   |                       |
| 0.000666007197832712 |         | 51337751              | 0.521175652822928 |                       |
| 0.000285631110435311 |         | 0.000365401961097425  |                   | 54.5494313210849      |
| 51.5664887444883     |         |                       |                   |                       |
| BATF3-regulon        | B EIF5A | 0.084689298919873     |                   | 0.00160662419239002   |
| 50803369             |         | 0.515750660837852     |                   | 0.0110179219561149    |
| 0.0134874561876579   |         | 100                   | 100               |                       |
| BCL11A-regulon       | B EIF5A | 0.202597659634682     |                   | -0.0020036121610521   |
| 46503991.5           |         | 0.472103815550557     |                   |                       |
| 6.71912078920116e-06 |         | 9.35407011829966e-06  | 100               | 100                   |
| BHLHE40-regulon      | B EIF5A | 0.0593791452417265    |                   | 0.00392574416319359   |
| 55734543.5           |         | 0.565811445331923     |                   |                       |
| 2.35819675365048e-26 |         | 5.97971319675658e-26  | 100               | 100                   |
| BRF2-regulon         | B EIF5A | 0.0430970430021434    |                   | 0.00156347403585166   |
| 51885004.5           |         | 0.526731314973421     |                   |                       |
| 1.60044451187924e-05 |         | 2.16441067320811e-05  |                   | 99.737532808399       |
| 99.7284752842887     |         |                       |                   |                       |
| CEBPB-regulon        | B EIF5A | 0.144010128447368     |                   |                       |
| 0.000966814490405171 |         | 51699161              | 0.524844650568598 |                       |
| 6.07483732464121e-05 |         | 7.98728611202826e-05  | 100               | 100                   |
| CEBPG-regulon        | B EIF5A |                       |                   |                       |
| 0.0678546723445331   |         | -0.000216993314925196 |                   | 49476425.5            |

|                       |                    |                       |                       |                     |
|-----------------------|--------------------|-----------------------|-----------------------|---------------------|
| 0.502279664711208     |                    | 0.712922960663134     |                       | 0.728309787152267   |
| 100                   | 100                |                       |                       |                     |
| CLOCK-regulon         | B EIF5A            | 0.0186026601781033    |                       | 0.00316750911019067 |
| 52660263              | 0.534601660810036  |                       | 2.79736645354448e-09  |                     |
| 4.4136226267035e-09   |                    | 55.3805774278215      | 50.8656300765839      |                     |
| CREB1-regulon         | B EIF5A            |                       |                       |                     |
| 0.0425780059794145    |                    | -0.000414049844086904 | 48241670              |                     |
| 0.48974455183123      | 0.0978815717113085 |                       | 0.110310977642903     | 100                 |
| 99.9930378278023      |                    |                       |                       |                     |
| CREB3-regulon         | B EIF5A            | 0.224772158144463     |                       | -0.0158251094340668 |
| 33047224.5            |                    | 0.335492078777923     |                       |                     |
| 2.4805212720017e-155  |                    | 4.40292525780301e-154 | 100                   | 100                 |
| CREB3L2-regulon       | B EIF5A            |                       |                       |                     |
| 0.120252825292387     |                    | -0.00687050722031783  | 43081024              |                     |
| 0.437354195891445     |                    | 4.94136204532159e-24  |                       |                     |
| 1.16945568405944e-23  |                    | 100                   | 100                   |                     |
| CREB3L4-regulon       | B EIF5A            | 0.0162254092414996    |                       | 0.00539590523391537 |
| 54424555.5            |                    | 0.552512579725399     |                       |                     |
| 6.67991241203961e-25  |                    | 1.63542683191315e-24  | 39.9825021872266      |                     |
| 30.888837317243       |                    |                       |                       |                     |
| CREB5-regulon         | B EIF5A            | 0.0416421946039159    |                       | 0.00259880732797826 |
| 54433933              | 0.552607779156406  |                       | 2.05204351252734e-17  |                     |
| 4.34910714595346e-17  |                    | 99.5625546806649      | 99.6263634253887      |                     |
| CREM-regulon          | B EIF5A            | 0.140300565143333     |                       | -0.0102135414573265 |
| 32471890              | 0.329651341157199  |                       | 2.07145892921127e-166 |                     |
| 4.90245279913334e-165 |                    | 100                   | 100                   |                     |
| CTCF-regulon          | B EIF5A            | 0.356074553286215     |                       | -0.0155490445795856 |
| 34826137              | 0.353551418453756  |                       | 1.62278373437998e-123 |                     |
| 1.64596635915684e-122 |                    | 100                   | 100                   |                     |
| CUX1-regulon          | B EIF5A            |                       |                       |                     |
| 0.0691235711986506    |                    | -0.00797633451030395  | 36904135.5            |                     |
| 0.374647048934386     |                    | 5.14351546595012e-91  |                       |                     |
| 3.31990543711326e-90  |                    | 100                   | 100                   |                     |
| DDIT3-regulon         | B EIF5A            |                       |                       |                     |
| 0.0842149316422637    |                    | -0.000729970814526679 | 48832742              |                     |
| 0.495745054959335     |                    | 0.492246394451911     | 0.510211591329718     |                     |
| 100                   | 100                |                       |                       |                     |
| E2F1-regulon          | B EIF5A            | 0.4068888909496       |                       | -0.03244035198157   |
| 32993912.5            | 0.334950860749044  |                       | 2.42216745938266e-156 |                     |
| 4.9135397033191e-155  |                    | 100                   | 100                   |                     |
| E2F2-regulon          | B EIF5A            |                       |                       |                     |
| 0.0498402637834519    |                    | -0.00429721785420516  | 41835192              |                     |
| 0.424706635504398     |                    | 5.58258933056317e-34  | 1.6515160102916e-33   |                     |
| 100                   | 100                |                       |                       |                     |
| E2F3-regulon          | B EIF5A            | 0.0242526316534494    |                       | 0.00330377011461408 |
| 60928262.5            |                    | 0.618537555020754     | 1.3734259084794e-81   |                     |
| 8.12610329183648e-81  |                    | 100                   | 100                   |                     |
| E2F4-regulon          | B EIF5A            |                       |                       |                     |
| 0.390735856019437     |                    | -0.00834192395639022  | 44734443              |                     |
| 0.454139538255096     |                    | 1.34348637604895e-13  |                       |                     |

|                       |                       |                       |                     |  |
|-----------------------|-----------------------|-----------------------|---------------------|--|
| 2.61335706025961e-13  | 100                   | 100                   |                     |  |
| E2F6-regulon          | B EIF5A               | 0.0753573814560314    | 0.00311299167530632 |  |
| 52433262              | 0.53229716963031      | 1.8610258826325e-07   |                     |  |
| 2.72438840550324e-07  | 100                   | 100                   |                     |  |
| E2F7-regulon          | B EIF5A               |                       |                     |  |
| 0.0300757104907388    | -0.000524753330398454 | 48094450.5            |                     |  |
| 0.488249994365696     | 0.0579031093658666    | 0.0657779322396245    |                     |  |
| 100                   | 100                   |                       |                     |  |
| E2F8-regulon          | B EIF5A               |                       |                     |  |
| 0.0700533725808572    | -0.00499487532554845  | 44211890              |                     |  |
| 0.448834633080937     | 1.48127266695356e-16  | 3.0932458633442e-16   |                     |  |
| 100                   | 100                   |                       |                     |  |
| EGR1-regulon          | B EIF5A               | 0.0487058205929684    | 0.00130874583075925 |  |
| 53331978              | 0.54142084351315      | 2.30522758056812e-11  |                     |  |
| 4.14357362583131e-11  | 100                   | 100                   |                     |  |
| EGR2-regulon          | B EIF5A               |                       |                     |  |
| 0.0449182651119381    | -0.00118957318370819  | 48589229              |                     |  |
| 0.493272935626607     | 0.277595674438493     | 0.298625649774742     |                     |  |
| 100                   | 99.9953585518682      |                       |                     |  |
| EGR3-regulon          | B EIF5A               | 0.0439386374797361    | 0.00259839951247336 |  |
| 55453031.5            | 0.562953563996656     | 2.9723909844465e-24   |                     |  |
| 7.15389016595599e-24  | 100                   | 99.9953585518682      |                     |  |
| ELF1-regulon          | B EIF5A               | 0.678765573354329     | -0.0297793207895184 |  |
| 30324630              | 0.307852574937764     | 3.68248669362946e-211 |                     |  |
| 1.30728277623846e-209 | 100                   | 100                   |                     |  |
| ELF2-regulon          | B EIF5A               | 0.0340516400716322    | 0.00146961590840498 |  |
| 52061573              | 0.528523820516866     | 4.15055920165276e-06  |                     |  |
| 5.89379406634692e-06  | 99.6062992125984      | 99.5312137386865      |                     |  |
| ELF4-regulon          | B EIF5A               | 0.0217757077564474    | 0.00350519423629235 |  |
| 57695561.5            | 0.585719501614863     |                       |                     |  |
| 1.56696722196207e-43  | 5.17463594229334e-43  | 98.8188976377953      |                     |  |
| 98.3105128800186      |                       |                       |                     |  |
| ELK1-regulon          | B EIF5A               |                       |                     |  |
| 0.0646720755876952    | -0.00145626078174889  | 46591829              |                     |  |
| 0.47299553296149      | 1.30971327179285e-05  | 1.80562412227752e-05  | 100                 |  |
| 100                   |                       |                       |                     |  |
| ELK3-regulon          | B EIF5A               |                       |                     |  |
| 0.0593299758282606    | -0.00587126926407152  | 40207101.5            |                     |  |
| 0.408178425509529     | 1.090274545863e-49    | 4.3005273753485e-49   |                     |  |
| 100                   | 100                   |                       |                     |  |
| ELK4-regulon          | B EIF5A               | 0.0738695996333791    | 0.0304043065138739  |  |
| 76211260              | 0.773688999016687     | 0                     | 0                   |  |
| 99.5188101487314      | 96.5815734509167      |                       |                     |  |
| ESRRA-regulon         | B EIF5A               |                       |                     |  |
| 0.0909157915412883    | -0.000863432869719599 | 47710695.5            |                     |  |
| 0.484354152441318     | 0.0115628123553439    | 0.0140334987560584    |                     |  |
| 100                   | 100                   |                       |                     |  |
| ETS1-regulon          | B EIF5A               | 0.221347016752729     | -0.0227374819209238 |  |
| 30881504.5            | 0.313505908506621     |                       |                     |  |
| 4.86903937253463e-199 | 1.38280718179983e-197 | 100                   | 100                 |  |

|                                   |         |                                    |                     |
|-----------------------------------|---------|------------------------------------|---------------------|
| ETV2-regulon                      | B EIF5A | 0.0301901744485001                 | 0.0016724027523052  |
| 53994149.5                        |         | 0.548143141570056                  |                     |
| 7.83479152057849e-15              |         | 1.58934342274592e-14               | 100 100             |
| ETV3-regulon                      | B EIF5A | 0.0140775002751472                 | 0.00278894935595978 |
| 56520565.5                        |         | 0.573791061131283                  |                     |
| 7.99819822125138e-33              |         | 2.27148829483539e-32               | 88.4951881014873    |
| 84.1285681132513                  |         |                                    |                     |
| ETV5-regulon                      | B EIF5A | 0.0343917201942661                 |                     |
| 0.000977314176565623              |         | 52777563 0.535792478539393         |                     |
| 7.61137565733789e-09              |         | 1.17479928624128e-08               | 100 100             |
| ETV6-regulon                      | B EIF5A |                                    |                     |
| 0.456070823522664                 |         | -0.00368996870214311               | 46836764            |
| 0.475482088294312                 |         | 7.58493925316257e-05               | 9.8812970087072e-05 |
| 100 100                           |         |                                    |                     |
| ETV7-regulon                      | B EIF5A |                                    |                     |
| 0.0558639548683323                |         | -0.00864779221509191               | 34887732            |
| 0.354176724660404                 |         | 1.76157429090712e-122              |                     |
| 1.66762366205874e-121             |         | 100 100                            |                     |
| FLI1-regulon                      | B EIF5A | 0.132325495700467                  | -0.0122217395715895 |
| 36601844 0.371578216217983        |         | 1.97478575352188e-95               |                     |
| 1.47589251052688e-94              |         | 100 100                            |                     |
| FOS-regulon                       | B EIF5A |                                    |                     |
| 0.0803422721987433                |         | -0.00625012797026644               | 40381130            |
| 0.409945145230019                 |         | 7.30282286416764e-48               |                     |
| 2.80270499111299e-47              |         | 100 100                            |                     |
| FOSB-regulon                      | B EIF5A | 0.0421724718330355                 |                     |
| 0.000736072558811869              |         | 50672090 0.514417929715156         |                     |
| 0.0199636846993428                |         | 0.023623693560889                  | 99.6062992125984    |
| 99.3084242283592                  |         |                                    |                     |
| FOSL1-regulon                     | B EIF5A | 0.0632864043502608                 | 0.00262493969618349 |
| 53676055.5                        |         | 0.544913883472851                  |                     |
| 4.19779398388395e-13              |         | 8.05522629339894e-13               | 100 100             |
| FOX01-regulon                     | B EIF5A | 0.0224708063314083                 | 0.00608013257176618 |
| 55836074 0.566842172693138        |         | 3.16558618481914e-30               |                     |
| 8.48138185366638e-30              |         | 60.673665791776 51.9006730099791   |                     |
| FOX03-regulon                     | B EIF5A |                                    |                     |
| 0.019607533512805                 |         | -0.000143614325414217              | 49471113.5          |
| 0.502225737824777                 |         | 0.69664978117215 0.716842528452502 |                     |
| 46.6754155730534 46.7649106521235 |         |                                    |                     |
| GABPA-regulon                     | B EIF5A | 0.0267052552520852                 | 0.00128190964203426 |
| 53169358 0.539769941730131        |         | 1.37350570440281e-10               |                     |
| 2.37850987835608e-10              |         | 100 100                            |                     |
| GTF2B-regulon                     | B EIF5A |                                    |                     |
| 0.0716839911569304                |         | -0.00776413943100575               | 39226359            |
| 0.398222026899689                 |         | 1.22986573039476e-60               |                     |
| 5.13649805047224e-60              |         | 100 100                            |                     |
| HINFP-regulon                     | B EIF5A | 0.0165991427778977                 |                     |
| 0.000388151377779148              |         | 49125872.5 0.498720886130821       |                     |
| 0.832282094458174                 |         | 0.838184804347948                  | 61.3298337707786    |
| 63.3348804827106                  |         |                                    |                     |

|                       |   |       |                       |                      |
|-----------------------|---|-------|-----------------------|----------------------|
| HIVEP3-regulon        | B | EIF5A |                       |                      |
| 0.0692580022612606    |   |       | -0.00887718960555701  | 41854961.5           |
| 0.424907333467744     |   |       | 8.29283891705076e-34  | 2.4032308698392e-33  |
| 99.4313210848644      |   |       | 99.7075887676955      |                      |
| H0XB2-regulon         | B | EIF5A |                       |                      |
| 0.0371321318818938    |   |       |                       |                      |
| 3.09674692861722e-05  |   |       | 50203756.5            | 0.509663455418038    |
| 0.118044335116536     |   |       | 0.130955434269907     | 83.7707786526684     |
| 83.7270828498492      |   |       |                       |                      |
| IKZF1-regulon         | B | EIF5A |                       |                      |
| 0.139079609334253     |   |       | -0.00503835109626907  | 39059508             |
| 0.396528172432844     |   |       | 1.30666520725345e-62  | 5.7983268571872e-62  |
| 100                   |   | 100   |                       |                      |
| IRF1-regulon          | B | EIF5A |                       |                      |
| 0.130245650073889     |   |       | -0.00547249275160103  | 43779477.5           |
| 0.444444825140649     |   |       | 3.06050365132549e-19  |                      |
| 6.68602336135723e-19  |   |       | 100                   | 100                  |
| IRF2-regulon          | B | EIF5A |                       |                      |
| 0.0838655558726579    |   |       | -0.00121613320078573  | 47595145             |
| 0.483181095458914     |   |       | 0.00663673438967081   | 0.00826680950292329  |
| 100                   |   | 100   |                       |                      |
| IRF3-regulon          | B | EIF5A |                       |                      |
| 0.137033614406387     |   |       | -0.00885923425906285  | 33369159.5           |
| 0.338760330318422     |   |       | 2.66286662384142e-149 |                      |
| 4.20141178428313e-148 |   |       | 100                   | 100                  |
| IRF4-regulon          | B | EIF5A |                       |                      |
| 0.0584877749957086    |   |       |                       |                      |
| 7.94263576568421e-05  |   |       | 51745127              | 0.525311292748884    |
| 4.4038799633472e-05   |   |       | 5.84440144668508e-05  | 100                  |
| 99.9953585518682      |   |       |                       |                      |
| IRF5-regulon          | B | EIF5A |                       |                      |
| 0.0527272932557965    |   |       |                       | 0.00598400544064977  |
| 53915410.5            |   |       | 0.547343791210364     |                      |
| 1.72275868303595e-14  |   |       | 3.44551736607191e-14  | 86.6141732283465     |
| 80.15316778835        |   |       |                       |                      |
| IRF7-regulon          | B | EIF5A |                       |                      |
| 0.0998140532492855    |   |       | -0.00844615107647262  | 38288554             |
| 0.388701525444618     |   |       | 3.77063522509592e-72  |                      |
| 1.98307482208748e-71  |   |       | 100                   | 100                  |
| IRF8-regulon          | B | EIF5A |                       |                      |
| 0.0732676393195593    |   |       | -0.00895650559126174  | 36665317             |
| 0.372222587690579     |   |       | 1.70420392692514e-94  |                      |
| 1.20998478811685e-93  |   |       | 100                   | 100                  |
| IRF9-regulon          | B | EIF5A |                       |                      |
| 0.0380308805833437    |   |       |                       | 0.00433294934410479  |
| 60063081              |   |       | 0.609754319988256     | 3.26023933795346e-70 |
| 1.65340709281925e-69  |   |       | 100                   | 100                  |
| JUN-regulon           | B | EIF5A |                       |                      |
| 0.0891783387635406    |   |       |                       |                      |
| 0.000819332630108915  |   |       | 49723651.5            | 0.504789478044184    |
| 0.439514662178695     |   |       | 0.458905014921872     | 100                  |
| 100                   |   | 100   |                       |                      |
| JUNB-regulon          | B | EIF5A |                       |                      |
| 0.158898636810618     |   |       | -0.000930743952087448 | 47597079.5           |
| 0.483200734307144     |   |       | 0.00670052075295063   | 0.00827368649494773  |
| 100                   |   | 100   |                       |                      |

|                      |         |                            |                                          |
|----------------------|---------|----------------------------|------------------------------------------|
| JUND-regulon         | B EIF5A | 0.0404270390561339         | 0.0020738288446035                       |
|                      |         | 54127603.5                 | 0.549497953072645                        |
| 1.36162096421126e-15 |         | 2.80217647707244e-15       | 100 100                                  |
| KLF11-regulon        | B EIF5A | 0.0246484770339974         | 0.0028558649471481                       |
|                      |         | 50993950.5                 | 0.00135023365956178                      |
|                      |         | 0.00171190338980155        | 43.0008748906387 40.7449524251566        |
| KLF12-regulon        | B EIF5A |                            |                                          |
|                      |         | 0.0415195398326602         | -0.00582346571224631 42232906            |
|                      |         | 0.428744187784139          | 1.31022344856509e-30                     |
|                      |         | 3.57791787877389e-30       | 97.7252843394576 98.6493385936412        |
| KLF13-regulon        | B EIF5A |                            |                                          |
|                      |         | 0.0632851021664498         | -0.00316652302595906 45448469            |
|                      |         | 0.461388257948378          | 4.60897818840792e-10                     |
|                      |         | 7.79136788992768e-10       | 100 100                                  |
| KLF2-regulon         | B EIF5A |                            |                                          |
|                      |         | 0.106032476146417          | -0.00296527888403024 45996552            |
|                      |         | 0.466952341098927          | 9.61589333223278e-08 1.4223508887261e-07 |
|                      |         | 100 100                    |                                          |
| KLF3-regulon         | B EIF5A | 0.0731532391396434         | 0.00118365321284979                      |
|                      |         | 50524139 0.512915946135649 | 0.0371045655930983                       |
|                      |         | 0.043187281264098          | 99.6937882764654 99.872360176375         |
| KLF4-regulon         | B EIF5A | 0.0173758566328049         | 0.00155437284825685                      |
|                      |         | 50400020.5                 | 0.511655907684317 0.0441402378666704     |
|                      |         | 0.0505476917505419         | 50.3937007874016 49.7818519378046        |
| KLF6-regulon         | B EIF5A | 0.0723052245291627         | 0.00308054235937233                      |
|                      |         | 52513921 0.5331160116357   | 9.04825314897677e-08                     |
|                      |         | 1.35247573384705e-07       | 100 100                                  |
| KLF7-regulon         | B EIF5A | 0.0489235173456834         | 0.00307994407330307                      |
|                      |         | 53046275.5                 | 0.538520420645957                        |
|                      |         | 5.06177800412963e-10       | 8.4561467833695e-10 98.9938757655293     |
|                      |         | 97.4796936644233           |                                          |
| KLF8-regulon         | B EIF5A | 0.0269807976282167         | 0.00197349683999223                      |
|                      |         | 52029721 0.528200462236256 | 4.71287727412354e-06                     |
|                      |         | 6.62602547451032e-06       | 80.6211723534558 77.4773729403574        |
| MAFB-regulon         | B EIF5A |                            |                                          |
|                      |         | 0.0556815259363517         | -0.000106757798737554 49792213.5         |
|                      |         | 0.505485512529778          | 0.375966740604046 0.401408098990786      |
|                      |         | 100 99.9976792759341       |                                          |
| MAFF-regulon         | B EIF5A | 0.014395923295826          | 0.00211556255085397                      |
|                      |         | 50799541.5                 | 0.515711804445192 0.00146346507034661    |
|                      |         | 0.00183904460167451        | 31.1023622047244 28.4103040148526        |
| MAFG-regulon         | B EIF5A | 0.0271285690758412         | 0.00181252995641345                      |
|                      |         | 50558990.5                 | 0.513269755036712 0.0262838640668385     |
|                      |         | 0.030845526425546          | 59.7550306211724 58.5402645625435        |
| MAX-regulon          | B EIF5A | 0.19432072309693           | -0.00352718302041763                     |
|                      |         | 41370908.5                 | 0.419993276397424 3.80429422505037e-38   |
|                      |         | 1.20046617768256e-37       | 100 100                                  |
| MAZ-regulon          | B EIF5A |                            |                                          |
|                      |         | 0.129436207390541          | -0.00723194424235907 38851698            |
|                      |         | 0.394418506343008          | 4.09950016520081e-65                     |

|                       |                       |                      |                      |     |
|-----------------------|-----------------------|----------------------|----------------------|-----|
| 1.94043007819505e-64  | 100                   | 100                  |                      |     |
| MEF2A-regulon         | B EIF5A               | 0.0464670166025497   | 0.00601577015625621  |     |
| 59837644              | 0.607465706378255     |                      | 2.15976180366767e-67 |     |
| 1.05753853834762e-66  | 100                   | 99.9976792759341     |                      |     |
| MLX-regulon           | B EIF5A               | 0.0530349123526026   | 0.00011526132894879  |     |
| 49970714              | 0.507297631541706     |                      | 0.238866398420329    |     |
| 0.260915604428359     | 99.9562554680665      | 99.9907171037364     |                      |     |
| MXD4-regulon          | B EIF5A               | 0.0704977753933591   | -0.0228210574549721  |     |
| 45520719              | 0.462121732636751     |                      | 9.47459242604127e-10 |     |
| 1.52885468692939e-09  | 83.4645669291339      | 88.8767695521003     |                      |     |
| MXI1-regulon          | B EIF5A               | 0.0681339026071762   | 0.00305843194439363  |     |
| 53010188              | 0.538154063997976     |                      | 7.36682172462019e-10 |     |
| 1.21638219173961e-09  | 100                   | 100                  |                      |     |
| MYBL1-regulon         | B EIF5A               | 0.0200265611407815   | -0.0103869421106813  |     |
| 42635059              | 0.432826804342657     |                      | 1.36080190447254e-27 |     |
| 3.51334309882002e-27  | 75.4593175853018      | 80.304014852634      |                      |     |
| MYC-regulon           | B EIF5A               |                      |                      |     |
| 0.313460290425754     | -0.00149688007217058  | 48540836             |                      |     |
| 0.49278165478793      | 0.244007580023308     | 0.264496766132136    |                      | 100 |
| 100                   |                       |                      |                      |     |
| NFATC1-regulon        | B EIF5A               | 0.0581158482072139   | 0.00800109358963407  |     |
| 57812457.5            | 0.586906217977104     |                      |                      |     |
| 1.05829652097026e-44  | 3.57805014232803e-44  | 96.8066491688539     |                      |     |
| 94.7226734741239      |                       |                      |                      |     |
| NFE2L1-regulon        | B EIF5A               | 0.182852564820755    |                      |     |
| 0.000195259257902675  | 50026393              | 0.507862879115047    |                      |     |
| 0.204421472159017     | 0.225022085632406     | 99.8687664041995     |                      |     |
| 99.9396611742864      |                       |                      |                      |     |
| NFE2L2-regulon        | B EIF5A               |                      |                      |     |
| 0.110648802473326     | -0.000244019597101922 | 50222506.5           |                      |     |
| 0.509853803520557     | 0.111747637813561     | 0.124946177712801    |                      |     |
| 100                   | 100                   |                      |                      |     |
| NFKB1-regulon         | B EIF5A               | 0.0630347110225679   | 0.00670363728390446  |     |
| 57388218              | 0.582599381505717     | 1.52010908634357e-40 |                      |     |
| 4.90580659683608e-40  | 99.912510936133       | 99.9326990020887     |                      |     |
| NFKB2-regulon         | B EIF5A               | 0.0755823345534526   | 0.00232276007034984  |     |
| 52854109              | 0.536569565785015     | 3.58540654999231e-09 |                      |     |
| 5.59481022086712e-09  | 100                   | 100                  |                      |     |
| NFYA-regulon          | B EIF5A               | 0.0248142495783574   | 0.00407093325994591  |     |
| 59302029              | 0.602028197101958     | 6.31350623503008e-61 |                      |     |
| 2.71672086477052e-60  | 99.6937882764654      | 98.9812021350661     |                      |     |
| NFYB-regulon          | B EIF5A               | 0.0981996095059098   | -0.0109783669597918  |     |
| 36318918              | 0.368705980097812     | 1.16509093143101e-99 |                      |     |
| 9.19127290351129e-99  | 100                   | 100                  |                      |     |
| NFYC-regulon          | B EIF5A               |                      |                      |     |
| 0.0759616691492137    | -0.00797483421662767  | 34130735             |                      |     |
| 0.346491767723743     | 1.62780730712566e-135 |                      |                      |     |
| 2.10135125101676e-134 | 100                   | 100                  |                      |     |
| NR1H3-regulon         | B EIF5A               | 0.010982813555525    | 0.00257831854992472  |     |
| 51461091.5            | 0.522427793096993     |                      |                      |     |



|                        |                       |                      |
|------------------------|-----------------------|----------------------|
| 6.20647339286823e-07   | 8.99305328354376e-07  | 26.0279965004374     |
| 21.8960315618473       |                       |                      |
| NR2C2-regulon B EIF5A  | 0.024789638365988     | 0.00316280922944907  |
| 53086482               | 0.5389285929651       | 2.49951059242492e-10 |
| 4.27627113402818e-10   | 79.2650918635171      | 75.8041308888373     |
| NR3C1-regulon B EIF5A  |                       |                      |
| 0.219262662778599      | -0.00654463510499431  | 38007382             |
| 0.385847095754943      | 8.41950434516381e-76  |                      |
| 4.78227846805305e-75   | 100                   | 100                  |
| NRF1-regulon B EIF5A   | 0.0277209626883117    | 0.00104441328261449  |
| 53001035               | 0.538061143668251     | 8.09745722297972e-10 |
| 1.32165393754382e-09   | 100                   | 99.9651891390114     |
| PAX5-regulon B EIF5A   | 0.0953657775376852    | -0.0051619559755333  |
| 41592870               | 0.422246607083142     | 4.01198268762025e-36 |
| 1.21213093966399e-35   | 100                   | 100                  |
| POU2F1-regulon B EIF5A | 0.0058186165643322    | 0.00098843196000863  |
| 52177427               | 0.529699958600557     | 1.2319479568126e-12  |
| 2.33248813156519e-12   | 24.0157480314961      | 18.045950336505      |
| POU6F1-regulon B EIF5A |                       |                      |
| 0.0273390783755196     | -0.00385738278921623  | 45898623.5           |
| 0.465958180877193      | 1.99733807869994e-08  |                      |
| 3.01725539548289e-08   | 59.8862642169729      | 65.6440009282896     |
| REL-regulon B EIF5A    |                       |                      |
| 0.262160022395524      | -0.00163429380197327  | 48731890.5           |
| 0.494721220737405      | 0.394222167605431     | 0.41775781940277     |
| 100                    |                       | 100                  |
| RELA-regulon B EIF5A   |                       |                      |
| 0.0919078515234028     | -0.000164918583868426 | 48768123.5           |
| 0.495089054486662      | 0.428000591884298     | 0.450193215167188    |
| 100                    | 100                   |                      |
| RELB-regulon B EIF5A   |                       |                      |
| 0.100125642407282      | -0.00532637410012937  | 40540803.5           |
| 0.41156613444322       | 3.22038716921757e-46  | 1.14323744507224e-45 |
| 100                    |                       | 100                  |
| REST-regulon B EIF5A   |                       |                      |
| 0.213889838404005      | -0.00497949597963646  | 40415939             |
| 0.410298522675383      | 1.67686266088571e-47  |                      |
| 6.26617099594136e-47   | 100                   | 100                  |
| RFX5-regulon B EIF5A   |                       |                      |
| 0.0562797355565817     | -0.00954985142143264  | 34398736.5           |
| 0.349212491830259      | 7.98798096528382e-131 |                      |
| 8.72533305438694e-130  | 100                   | 100                  |
| RXRA-regulon B EIF5A   | 0.016962445221413     | 0.00256134457292306  |
| 53320958.5             | 0.541308974664312     |                      |
| 8.80707136299535e-12   | 1.60333863275044e-11  | 69.4663167104112     |
| 63.9870039452309       |                       |                      |
| SETDB1-regulon B EIF5A |                       |                      |
| 0.0594907067007116     | -0.000238853426858733 | 49254394             |
| 0.500025623392574      | 0.996700748593361     | 0.996700748593361    |
| 92.3884514435696       | 95.1937804595034      |                      |

|                       |                   |                       |                     |
|-----------------------|-------------------|-----------------------|---------------------|
| S0X5-regulon          | B EIF5A           | 0.0118915465958711    | 0.004305131532586   |
| 54224006.5            |                   | 0.550476626572758     |                     |
| 7.63788358182686e-29  |                   | 2.00848049744336e-28  | 31.6272965879265    |
| 22.0097470410768      |                   |                       |                     |
| SP1-regulon           | B EIF5A           | 0.0181143807500735    | 0.00539215889006672 |
| 57759285.5            |                   | 0.586366421214057     |                     |
| 4.18397011371074e-47  |                   | 1.52339424653058e-46  | 70.3412073490814    |
| 59.264330471107       |                   |                       |                     |
| SP2-regulon           | B EIF5A           |                       |                     |
| 0.0277983157096507    |                   | -0.000465281800028503 | 47761630            |
| 0.484871234330798     |                   | 0.0146159771944897    | 0.0175887183187927  |
| 100                   | 100               |                       |                     |
| SP3-regulon           | B EIF5A           | 0.0296165572923499    | 0.0014180994959555  |
| 53574962.5            |                   | 0.543887597567361     |                     |
| 1.40674980833534e-12  |                   | 2.62840095767919e-12  | 100 100             |
| SP4-regulon           | B EIF5A           | 0.0109735081871126    | 0.00245949068953154 |
| 52490201              | 0.532875208596141 | 3.57958671400193e-11  |                     |
| 6.35376641735342e-11  |                   | 34.7331583552056      | 28.7119981434207    |
| SPI1-regulon          | B EIF5A           | 0.395361686213455     | -0.0244110996079357 |
| 29456529.5            |                   | 0.299039706512666     |                     |
| 8.91407048639531e-231 |                   | 4.21932669689378e-229 | 100 100             |
| SPIB-regulon          | B EIF5A           | 0.54360217005885      | -0.0219551286473042 |
| 33412072              | 0.33919597367572  | 1.66002869670064e-148 |                     |
| 2.35724074931491e-147 |                   | 100 100               |                     |
| SREBF1-regulon        | B EIF5A           |                       |                     |
| 0.0372939532028227    |                   | -0.00382881918494328  | 43692645.5          |
| 0.443563315463961     |                   | 8.32018391895043e-20  |                     |
| 1.84604080701713e-19  |                   | 94.5319335083115      | 97.0201902993734    |
| SREBF2-regulon        | B EIF5A           |                       |                     |
| 0.0944990948881601    |                   | -0.00472139872350062  | 39054942            |
| 0.396481818862918     |                   | 1.15265049847586e-62  |                     |
| 5.27988292850231e-62  |                   | 100 100               |                     |
| SRF-regulon           | B EIF5A           | 0.0231183301147838    | 0.00247378068888025 |
| 55161545.5            |                   | 0.559994427622748     |                     |
| 3.55955859995453e-22  |                   | 8.15253743860553e-22  | 98.9063867016623    |
| 97.8834996518914      |                   |                       |                     |
| STAT1-regulon         | B EIF5A           |                       |                     |
| 0.0785666412230692    |                   | -0.00126563028088776  | 46615188.5          |
| 0.473232676241532     |                   | 1.55887057980338e-05  |                     |
| 2.12845790703924e-05  |                   | 100 100               |                     |
| STAT2-regulon         | B EIF5A           | 0.0681057939895882    | 0.00197072248150459 |
| 51534971              | 0.523177810304462 | 0.000183391817937078  |                     |
| 0.000236742164973319  |                   | 99.9562554680665      | 99.9628684149455    |
| STAT5A-regulon        | B EIF5A           | 0.0745104412722433    | 0.00305660162082272 |
| 53441008.5            |                   | 0.542527710115372     |                     |
| 6.70048167149167e-12  |                   | 1.23567324331405e-11  | 100 100             |
| TBP-regulon           | B EIF5A           | 0.0639999140864883    | 0.0453851076720392  |
| 80243141.5            |                   | 0.81462025198231      | 0                   |
| 88.1014873140857      | 47.8579716871664  |                       |                     |
| TCF12-regulon         | B EIF5A           | 0.0114629884274931    | 0.00254762189572501 |

|                |                       |                       |                          |
|----------------|-----------------------|-----------------------|--------------------------|
|                | 51246906.5            | 0.520253408652301     | 1.8235742102636e-05      |
|                | 2.4429013005418e-05   | 28.3902012248469      | 25.0522162914829         |
| TFDP1-regulon  | B EIF5A               | 0.508380097489148     | -0.0208327384821119      |
|                | 38258787.5            | 0.388399338948958     |                          |
|                | 1.56399277378684e-72  | 8.54180668760502e-72  | 100 100                  |
| TFDP2-regulon  | B EIF5A               |                       |                          |
|                | 0.0270422316812533    | -8.52150945480044e-05 | 50504303                 |
|                | 0.512714573071033     | 0.0401589372226185    | 0.0463623502895271       |
|                | 100                   | 99.9953585518682      |                          |
| TFEC-regulon   | B EIF5A               | 0.0940809889907786    | 0.00267416553384214      |
|                | 53288912.5            | 0.540983646915335     |                          |
|                | 3.72325422309098e-11  | 6.52718641578913e-11  | 100 100                  |
| THAP1-regulon  | B EIF5A               | 0.0382507813314205    | 0.00114326489900245      |
|                | 52917087.5            | 0.537208917143654     |                          |
|                | 1.90793502381519e-09  | 3.04412104923323e-09  | 100 100                  |
| THAP11-regulon | B EIF5A               |                       |                          |
|                | 0.175761753088677     | -0.00286004312257296  | 43521888                 |
|                | 0.441829802604449     | 6.08184545434812e-21  |                          |
|                | 1.37082865796418e-20  | 100 100               |                          |
| TP53-regulon   | B EIF5A               | 0.108066947739947     | 0.0102254016398844       |
|                | 61617135              | 0.625530918927545     | 2.87132892932012e-91     |
|                | 1.94156527601646e-90  | 100 100               |                          |
| USF2-regulon   | B EIF5A               |                       |                          |
|                | 0.120859351169776     | -0.00466170629775849  | 40190536.5               |
|                | 0.40801025930589      | 7.27612683659699e-50  | 2.95202860227649e-49 100 |
|                | 100                   |                       |                          |
| XBP1-regulon   | B EIF5A               | 0.18279372915476      | -0.0131590794697917      |
|                | 34334771.5            | 0.348563125623453     | 6.17239904143782e-132    |
|                | 7.30400553236809e-131 | 100 100               |                          |
| YBX1-regulon   | B EIF5A               |                       |                          |
|                | 0.0930438981737781    | -0.00225338734059748  | 44692673.5               |
|                | 0.453715498518127     | 8.00478142211145e-14  |                          |
|                | 1.57872078047198e-13  | 100 100               |                          |
| YY1-regulon    | B EIF5A               | 0.614927210739505     | -0.0258462301202783      |
|                | 35334527.5            | 0.358712547361146     |                          |
|                | 4.22688458311727e-115 | 3.75136006751657e-114 | 100 100                  |
| YY2-regulon    | B EIF5A               | 0.0527885915509142    | 0.00188131337715656      |
|                | 50722064              | 0.514925260705837     | 0.0159553426616987       |
|                | 0.0190391483862287    | 89.8075240594926      | 90.5685773961476         |
| ZBTB33-regulon | B EIF5A               |                       |                          |
|                | 0.358980300572642     | -0.00720889026332328  | 43201160                 |
|                | 0.438573804405802     | 3.61547851383747e-23  |                          |
|                | 8.41635981909707e-23  | 100 100               |                          |
| ZNF143-regulon | B EIF5A               | 0.0268536454520769    | 0.00370980614314494      |
|                | 61373174              | 0.623054251544155     | 8.89669087654833e-88     |
|                | 5.49273958465157e-87  | 100 99.9930378278023  |                          |
| ZNF274-regulon | B EIF5A               | 0.0670056624074452    | 0.00175241672698287      |
|                | 52737361.5            | 0.535384356979745     |                          |
|                | 1.12329806742188e-08  | 1.71514328574093e-08  | 100 100                  |
| ZNF76-regulon  | B EIF5A               | 0.0169065490555792    | 0.0024740844414755       |

|                       |                       |                      |     |
|-----------------------|-----------------------|----------------------|-----|
| 57945199.5            | 0.588253801327747     |                      |     |
| 4.88355652529221e-46  | 1.69137811363779e-45  | 99.6062992125984     |     |
| 99.4523091204456      |                       |                      |     |
| ATF1-regulon B LY9    |                       |                      |     |
| 0.102701708080722     | -0.00358036005674849  | 14004290.5           |     |
| 0.444058776003567     | 3.24291997582238e-07  |                      |     |
| 5.29304179961814e-07  | 100 100               |                      |     |
| ATF3-regulon B LY9    |                       |                      |     |
| 0.0488824181950674    | -0.00217317503798128  | 15552173.5           |     |
| 0.493140236458613     | 0.531015290010309     | 0.558549416158992    |     |
| 100 100               |                       |                      |     |
| ATF4-regulon B LY9    |                       |                      |     |
| 0.106801062011555     | -0.00198140903356452  | 15770592.5           |     |
| 0.500066033506019     | 0.995189606918874     | 0.998566325283668    |     |
| 100 100               |                       |                      |     |
| ATF5-regulon B LY9    |                       |                      |     |
| 0.114664005179128     | -0.00382901151308394  | 14843864             |     |
| 0.47068061598718      | 0.00741626471487056   | 0.00957372354101473  | 100 |
| 99.9977613610925      |                       |                      |     |
| ATF6-regulon B LY9    |                       |                      |     |
| 0.134217647025864     | -0.00223101053220523  | 17766041.5           |     |
| 0.563339259701773     | 7.27853285602432e-09  |                      |     |
| 1.29193958194432e-08  | 100 100               |                      |     |
| ATF6B-regulon B LY9   | 0.0600382989038765    | 0.00278512086619856  |     |
| 18373790.7460938      | 0.582610238573389     |                      |     |
| 4.52885151133774e-14  | 9.45730756779352e-14  | 100                  |     |
| 99.9194089993284      |                       |                      |     |
| BACH1-regulon B LY9   | 0.0598419350358669    | 0.0168208122343383   |     |
| 22535328.5            | 0.714567467059348     |                      |     |
| 1.70333602858726e-85  | 4.83747432118782e-84  | 100                  |     |
| 99.5567494963062      |                       |                      |     |
| BATF-regulon B LY9    |                       |                      |     |
| 0.0152140554905628    | -0.00414377026148587  | 14961737.5           |     |
| 0.474418239262936     | 0.0131398393924507    | 0.016084975808       |     |
| 47.3087818696884      | 51.7864338482203      |                      |     |
| BATF3-regulon B LY9   | 0.0683099708976349    | -0.0150884027733824  |     |
| 12205815.5            | 0.387031352359862     |                      |     |
| 5.92218680752682e-25  | 1.55731579012742e-24  | 100 100              |     |
| BCL11A-regulon B LY9  | 0.215236117320346     | 0.0109054624563451   |     |
| 19480616              | 0.617706301990486     | 5.9672467126873e-27  |     |
| 1.80287028340765e-26  | 100 100               |                      |     |
| BHLHE40-regulon B LY9 | 0.0703562279879648    | 0.0149374618913212   |     |
| 23145553              | 0.733916933178848     | 3.0073275798302e-101 |     |
| 2.13520258167944e-99  | 100 100               |                      |     |
| BRF2-regulon B LY9    |                       |                      |     |
| 0.0406474774494405    | -0.000980107237846355 | 15310210             |     |
| 0.4854678723608       | 0.184467345885802     | 0.203057078416929    |     |
| 99.7167138810198      | 99.7291246921872      |                      |     |
| CEBPB-regulon B LY9   |                       |                      |     |
| 0.139968445430035     | -0.00317294318788722  | 15304438             |     |

|                       |                      |                       |     |
|-----------------------|----------------------|-----------------------|-----|
| 0.485284849361164     | 0.17900039059508     | 0.198578558316417     | 100 |
| 100                   |                      |                       |     |
| CEBPG-regulon B LY9   |                      |                       |     |
| 0.0593882090642635    | -0.00880959211429685 | 13002714              |     |
| 0.412300020737533     | 1.15572362942319e-15 |                       |     |
| 2.52481162120143e-15  | 100                  | 100                   |     |
| CLOCK-regulon B LY9   | 0.0199754363325252   | 0.00444994534007528   |     |
| 17429381              | 0.552664170552576    | 3.08549498403229e-07  |     |
| 5.09465450851844e-07  | 59.2067988668555     | 50.9648533691516      |     |
| CREB1-regulon B LY9   | 0.0446100380586315   | 0.00166474322464401   |     |
| 16834625              | 0.533805191486069    | 0.0020204433364789    |     |
| 0.00273240908361909   | 100                  | 99.9932840832774      |     |
| CREB3-regulon B LY9   |                      |                       |     |
| 0.233324727519268     | -0.00657762654046978 | 14446882              |     |
| 0.458092806485838     | 0.00012965412874725  | 0.00019178006543864   |     |
| 100                   | 100                  |                       |     |
| CREB3L2-regulon B LY9 | 0.12638590639485     | -0.000397480815270967 |     |
| 18892331              | 0.599052510351327    | 1.4853080583381e-19   |     |
| 3.5748092251527e-19   | 100                  | 100                   |     |
| CREB3L4-regulon B LY9 | 0.012459950444924    | 0.00138007831152889   |     |
| 16429742              | 0.520966851021434    | 0.019905225849577     |     |
| 0.0237524543751255    | 35.6940509915014     | 31.2782628162077      |     |
| CREB5-regulon B LY9   | 0.03593733511178     | -0.00328813737525351  |     |
| 15262445              | 0.483953303133904    | 0.142800665036167     |     |
| 0.162221555481086     | 99.4334277620397     | 99.6261473024401      |     |
| CREM-regulon B LY9    | 0.143104869528493    | -0.0070036576139498   |     |
| 11550469              | 0.36625112328305     | 2.60324220634596e-34  |     |
| 9.99082144057097e-34  | 100                  | 100                   |     |
| CTCF-regulon B LY9    | 0.36206955228623     | -0.00890931847570314  |     |
| 12506142.5            | 0.396554351045216    | 3.48586115796417e-21  |     |
| 8.53434973156746e-21  | 100                  | 100                   |     |
| CUX1-regulon B LY9    |                      |                       |     |
| 0.0745368612676811    | -0.00219536162696822 | 15295160.5            |     |
| 0.484990671280926     | 0.170467058232787    | 0.190600962748471     |     |
| 100                   | 100                  |                       |     |
| DDIT3-regulon B LY9   | 0.092531316772253    | 0.00774367247057173   |     |
| 19409158              | 0.615440456961374    | 5.50530634745973e-26  |     |
| 1.56350700267856e-25  | 100                  | 100                   |     |
| E2F1-regulon B LY9    | 0.405139320587518    | -0.033070142637915    |     |
| 9257328               | 0.293538451001395    | 2.68290545687322e-79  |     |
| 5.44246535537139e-78  | 100                  | 100                   |     |
| E2F2-regulon B LY9    | 0.0525081185162547   | -0.001435203514261    |     |
| 16253222.5            | 0.515369635431629    | 0.160435276494957     |     |
| 0.180808010018126     | 100                  | 100                   |     |
| E2F3-regulon B LY9    | 0.0231010916359227   | 0.00201717426468389   |     |
| 18028590.5            | 0.571664364610226    |                       |     |
| 5.96360483377033e-11  | 1.09978167064336e-10 | 100                   | 100 |
| E2F4-regulon B LY9    | 0.369850368047542    | -0.0292624447166676   |     |
| 9976535               | 0.316343617754626    | 3.90054657283921e-63  |     |
| 3.95626866673691e-62  | 100                  | 100                   |     |

|                            |                  |                                     |                       |
|----------------------------|------------------|-------------------------------------|-----------------------|
| E2F6-regulon               | B LY9            | 0.0591009716952773                  | -0.0135104552947174   |
| 11763898.5                 |                  | 0.373018709440524                   |                       |
| 4.29839096965804e-31       |                  | 1.41946864579405e-30                | 100 100               |
| E2F7-regulon               | B LY9            | 0.032562093879538                   | 0.0020194876123412    |
| 18073748.5                 |                  | 0.573096269083128                   |                       |
| 2.46535755430843e-11       |                  | 4.73082125286212e-11                | 100 100               |
| E2F8-regulon               | B LY9            | 0.067797535459356                   | -0.00710969426915428  |
| 0.382816892655045          |                  | 1.00054418065684e-26                | 12072904              |
| 2.95994320110981e-26       |                  | 100 100                             |                       |
| EGR1-regulon               | B LY9            | 0.0494848027632652                  | 0.00205374866368488   |
| 18029787.5                 |                  | 0.571702320003602                   |                       |
| 5.82685644238445e-11       |                  | 1.08870212476131e-10                | 100 100               |
| EGR2-regulon               | B LY9            | 0.0452738234829196                  | -0.000786319495059987 |
| 0.503000442020204          |                  | 0.784077129958236                   | 15863135              |
| 100                        | 99.9955227221849 |                                     | 0.812693083606346     |
| EGR3-regulon               | B LY9            | 0.0420418985365079                  |                       |
| 0.000579776330972809       |                  | 16642490 0.52771282765461           | 0.0113791686861001    |
| 0.0141740522230369         |                  | 100 99.9955227221849                |                       |
| ELF1-regulon               | B LY9            | 0.692754808480787                   | -0.0145156794206889   |
| 12224329.5                 |                  | 0.387618408460914                   |                       |
| 1.03344776008239e-24       |                  | 2.66817421694e-24                   | 100 100               |
| ELF2-regulon               | B LY9            | 0.0403836715391173                  | 0.00784974276610189   |
| 20149682 0.638921559487865 |                  | 6.99715987882354e-37                |                       |
| 3.20515065417078e-36       |                  | 100 99.5276471905082                |                       |
| ELF4-regulon               | B LY9            | 0.0219197952122911                  | 0.00352757850992159   |
| 18799344.5                 |                  | 0.596104023144863                   |                       |
| 1.68512672025639e-18       |                  | 3.79822213137155e-18                | 99.4334277620397      |
| 98.3187821804343           |                  |                                     |                       |
| ELK1-regulon               | B LY9            | 0.0643232141892095                  | -0.00175912719729679  |
| 0.461473468323894          |                  | 0.000434189063572426                | 14553498              |
| 0.000610444029973113       |                  | 100 100                             |                       |
| ELK3-regulon               | B LY9            | 0.0719651066774835                  | 0.00717122688214672   |
| 19556652.5                 |                  | 0.620117325606541                   |                       |
| 5.35404044905845e-28       |                  | 1.68949720836956e-27                | 100 100               |
| ELK4-regulon               | B LY9            | 0.0470795040653397                  | 0.00211538372929196   |
| 16527450.5                 |                  | 0.52406506702282 0.0279672168174376 |                       |
| 0.0330945399006345         |                  | 97.8753541076487 96.7114394448175   |                       |
| ESRRA-regulon              | B LY9            | 0.0791357039174231                  | -0.0127991622649816   |
| 11509177.5                 |                  | 0.364941820755417                   |                       |
| 5.94229746797532e-35       |                  | 2.41087497272141e-34                | 100 100               |
| ETS1-regulon               | B LY9            | 0.232809954126705                   | -0.0102891392364237   |
| 12966048.5                 |                  | 0.411137402963248                   |                       |
| 4.84779717385496e-16       |                  | 1.07560499794907e-15                | 100 100               |
| ETV2-regulon               | B LY9            | 0.0328461564879497                  | 0.00431120831920522   |
| 19706907.5                 |                  | 0.624881726301344                   |                       |
| 3.96373105850978e-30       |                  | 1.27920411433725e-29                | 100 100               |
| ETV3-regulon               | B LY9            | 0.0128610096498295                  | 0.0014545858324131    |

|                      |                    |                      |                      |
|----------------------|--------------------|----------------------|----------------------|
|                      | 17001731           | 0.539103916603408    | 0.000346265735643484 |
| 0.000491697344613747 |                    | 87.1104815864023     | 84.3049026192075     |
| ETV5-regulon         | B LY9              | 0.0335286890591028   |                      |
| 6.60749290137611e-05 |                    | 16065721             | 0.509424194169265    |
| 0.389430850600538    |                    | 0.412680453621466    | 100 100              |
| ETV6-regulon         | B LY9              | 0.470810220991784    | 0.0114128978773999   |
|                      | 19398557           | 0.615104312328812    | 7.62733806739703e-26 |
| 2.12369020700074e-25 |                    | 100 100              |                      |
| ETV7-regulon         | B LY9              | 0.0648811696138257   |                      |
| 0.000817814411085693 |                    | 17186380.5           | 0.544958924464011    |
| 4.02900974499779e-05 |                    | 6.08637642329454e-05 | 100 100              |
| FLI1-regulon         | B LY9              | 0.149656728165037    | 0.00581569836965617  |
|                      | 17237412           | 0.546577070376339    | 2.10375341435198e-05 |
| 3.21218263266647e-05 |                    | 100 100              |                      |
| FOS-regulon          | B LY9              | 0.0963145056572438   | 0.0101956134133453   |
|                      | 22695874.5         | 0.71965818266913     | 1.65162688458171e-89 |
| 5.86327544026507e-88 |                    | 100 100              |                      |
| FOSB-regulon         | B LY9              | 0.0537079256062185   | 0.0124278065137936   |
|                      | 21138033           | 0.670260950463931    | 1.61999230597619e-54 |
| 1.27799393027011e-53 |                    | 100 99.3127378553839 |                      |
| FOSL1-regulon        | B LY9              |                      |                      |
| 0.0532933869210775   |                    | -0.00761886069751678 | 14154401.5           |
| 0.448818610636008    |                    | 2.95291895947797e-06 |                      |
| 4.65904991384302e-06 |                    | 100 100              |                      |
| FOX01-regulon        | B LY9              | 0.0222287414158795   | 0.00561918457377148  |
|                      | 17940431.5         | 0.568868951473538    |                      |
| 2.73588621201431e-11 |                    | 5.17994456141376e-11 | 61.7563739376771     |
| 52.1938661293933     |                    |                      |                      |
| FOX03-regulon        | B LY9              | 0.0234560357467139   | 0.00377079239050264  |
|                      | 16915078.5         | 0.536356272723295    |                      |
| 0.000314365646494648 |                    | 0.000450908301032727 | 52.1246458923513     |
| 46.6756212222968     |                    |                      |                      |
| GABPA-regulon        | B LY9              | 0.0275002512779848   | 0.00204412863547071  |
|                      | 18018739           | 0.571351985698078    | 7.2149509199042e-11  |
| 1.31349106490564e-10 |                    | 100 100              |                      |
| GTF2B-regulon        | B LY9              | 0.0731556557181761   | -0.0059945940665089  |
|                      | 13185971           | 0.41811087414093     | 7.52276873334736e-14 |
| 1.54816400019612e-13 |                    | 100 100              |                      |
| HINFP-regulon        | B LY9              | 0.0183652646263222   | 0.00216845730608043  |
|                      | 16465573.5         | 0.522103023684546    | 0.038392803717011    |
|                      | 0.0450560175852526 | 65.1558073654391     | 63.2034922766958     |
| HIVEP3-regulon       | B LY9              | 0.0819739725585603   | 0.00435374452891921  |
|                      | 17317852           | 0.549127723545218    | 7.23959880054229e-06 |
| 1.11741633660544e-05 |                    | 99.8583569405099     | 99.6910678307589     |
| HOXB2-regulon        | B LY9              | 0.0597920023843358   | 0.0230478771473103   |
|                      | 22055324.5         | 0.699347132354293    |                      |
| 2.29089327258886e-74 |                    | 3.25306844707618e-73 | 94.4759206798867     |
| 83.5594358629953     |                    |                      |                      |
| IKZF1-regulon        | B LY9              |                      |                      |
| 0.138714123073008    |                    | -0.00523140482042786 | 11577880             |

|                       |                       |                      |                     |
|-----------------------|-----------------------|----------------------|---------------------|
| 0.367120292278725     |                       | 6.88654830109788e-34 | 2.5733943651471e-33 |
| 100                   | 100                   |                      |                     |
| IRF1-regulon          | B LY9                 | 0.145401377178331    | 0.01011633222352    |
| 21714607              | 0.688543400739829     | 1.93049851656265e-66 |                     |
| 2.28442324459913e-65  | 100                   | 100                  |                     |
| IRF2-regulon          | B LY9                 | 0.0951040483151798   | 0.0102429964954111  |
| 20721717              | 0.657060083673093     | 1.17353413789962e-46 |                     |
| 6.94341031590606e-46  | 100                   | 100                  |                     |
| IRF3-regulon          | B LY9                 | 0.151846307502967    | 0.00650092585017725 |
| 20430484.5            | 0.647825460363725     |                      |                     |
| 1.56476056667363e-41  | 8.22948149880207e-41  | 100                  | 100                 |
| IRF4-regulon          | B LY9                 | 0.0552400067885167   | -0.0032224814958161 |
| 14822039              | 0.469988572160591     | 0.00612990183548173  |                     |
| 0.0079857436755817    | 100                   | 99.9955227221849     |                     |
| IRF5-regulon          | B LY9                 | 0.0644634193535156   | 0.0176939613218648  |
| 19861031.5            | 0.629768808213331     |                      |                     |
| 1.25226358688282e-32  | 4.44553573343401e-32  | 93.4844192634561     |                     |
| 80.2731139467204      |                       |                      |                     |
| IRF7-regulon          | B LY9                 | 0.115835612817275    | 0.00812737042918966 |
| 20828938              | 0.660459929314818     | 1.27428203707562e-48 |                     |
| 8.6165737745113e-48   | 100                   | 100                  |                     |
| IRF8-regulon          | B LY9                 |                      |                     |
| 0.077434573187421     | -0.00440691817191347  | 13933608.5           |                     |
| 0.441817536977178     | 1.0758018080254e-07   |                      |                     |
| 1.79722184399537e-07  | 100                   | 100                  |                     |
| IRF9-regulon          | B LY9                 | 0.0377022988716599   | 0.00384591590526329 |
| 18849743              | 0.597702097408062     | 4.55850744999595e-19 |                     |
| 1.06116075065479e-18  | 100                   | 100                  |                     |
| JUN-regulon           | B LY9                 | 0.0965095963134052   | 0.00823747897054061 |
| 20244426              | 0.64192577485127      | 2.03119159999463e-38 |                     |
| 9.61430690664125e-38  | 100                   | 100                  |                     |
| JUNB-regulon          | B LY9                 | 0.171973117231321    | 0.0123832967690701  |
| 20918472.5            | 0.663298957859684     |                      |                     |
| 2.71087111997638e-50  | 1.92471849518323e-49  | 100                  | 100                 |
| JUND-regulon          | B LY9                 | 0.0441978468921254   | 0.00583088115692668 |
| 20425061              | 0.647653487869177     | 1.93629754742134e-41 |                     |
| 9.81979470477965e-41  | 100                   | 100                  |                     |
| KLF11-regulon         | B LY9                 | 0.065851639879911    | 0.0446092218014056  |
| 24623049.5            | 0.780766524547976     |                      |                     |
| 2.79917950197073e-182 | 3.97483489279843e-180 | 82.0113314447592     |                     |
| 40.2081934184016      |                       |                      |                     |
| KLF12-regulon         | B LY9                 | 0.0505515515926049   | 0.00355727396638814 |
| 17083907.5            | 0.541709632045133     |                      |                     |
| 0.000139485891561528  | 0.000204195841255021  | 99.2917847025496     |                     |
| 98.5918961271547      |                       |                      |                     |
| KLF13-regulon         | B LY9                 | 0.0705395775898452   | 0.00431460934908026 |
| 20790211              | 0.659231943918607     | 6.59980600701702e-48 |                     |
| 4.25987478634735e-47  | 100                   | 100                  |                     |
| KLF2-regulon          | B LY9                 | 0.121228318719712    | 0.0125756141816202  |
| 20749061              | 0.65792712818142      | 3.73704732921285e-47 |                     |



|                      |                      |                      |                     |  |
|----------------------|----------------------|----------------------|---------------------|--|
| 2.30722052499228e-46 | 100                  | 100                  |                     |  |
| KLF3-regulon         | B LY9                | 0.0926851398629044   | 0.0209823851390282  |  |
| 21787945             | 0.690868858249765    | 4.81405712100931e-68 |                     |  |
| 6.21451010166657e-67 | 100                  | 99.8612043877323     |                     |  |
| KLF4-regulon         | B LY9                | 0.0186953608090408   | 0.00283975257515711 |  |
| 16547993.5           | 0.524716460210889    | 0.0157356461042987   |                     |  |
| 0.0189850583081635   | 52.1246458923513     | 49.7761361092456     |                     |  |
| KLF6-regulon         | B LY9                | 0.0850350555383821   | 0.0159026053758606  |  |
| 21649647             | 0.686483599274757    | 4.89077238341096e-65 |                     |  |
| 5.34222829572582e-64 | 100                  | 100                  |                     |  |
| KLF7-regulon         | B LY9                | 0.0615379838903264   | 0.0157848404756738  |  |
| 21380542.5           | 0.677950627548196    |                      |                     |  |
| 2.18994182368416e-59 | 1.82924552331265e-58 | 99.7167138810198     |                     |  |
| 97.5218267293486     |                      |                      |                     |  |
| KLF8-regulon         | B LY9                | 0.0349759777521817   | 0.0100252355527267  |  |
| 19918400.5           | 0.631587908432693    |                      |                     |  |
| 1.26984494053044e-33 | 4.623537988598e-33   | 92.2096317280453     |                     |  |
| 77.4054175061563     |                      |                      |                     |  |
| MAFB-regulon         | B LY9                | 0.0574803508966381   | 0.00172427328968783 |  |
| 16951410             | 0.537508299769604    | 0.000613910983155078 |                     |  |
| 0.000854660388313933 | 100                  | 99.9977613610925     |                     |  |
| MAFF-regulon         | B LY9                | 0.0156154083362493   | 0.00327949280301193 |  |
| 16686939.5           | 0.529122266466521    |                      |                     |  |
| 0.000846784365888873 | 0.00116741145588563  | 33.7110481586402     |                     |  |
| 28.4642937094247     |                      |                      |                     |  |
| MAFG-regulon         | B LY9                | 0.0394213349701077   | 0.0142354703613184  |  |
| 19851630.5           | 0.629470714100445    |                      |                     |  |
| 1.36359570750426e-34 | 5.37862751293347e-34 | 74.6458923512748     |                     |  |
| 58.3478844862324     |                      |                      |                     |  |
| MAX-regulon          | B LY9                | 0.201486605323548    | 0.00387671268334888 |  |
| 18090634             | 0.573631687458105    | 1.76426561741672e-11 |                     |  |
| 3.43185914620786e-11 | 100                  | 100                  |                     |  |
| MAZ-regulon          | B LY9                |                      |                     |  |
| 0.129938027234084    | -0.00646639579544714 | 12168814.5           |                     |  |
| 0.38585809629445     | 1.92981632364288e-25 | 5.26988303764017e-25 | 100                 |  |
| 100                  |                      |                      |                     |  |
| MEF2A-regulon        | B LY9                | 0.0440037370981556   | 0.00330077826822682 |  |
| 17870375             | 0.56664754628053     | 1.15410676308239e-09 |                     |  |
| 2.07447038427468e-09 | 100                  | 99.9977613610925     |                     |  |
| MLX-regulon          | B LY9                | 0.0574792341258559   | 0.00462574782734605 |  |
| 18286510             | 0.579842673784651    | 3.06477289336926e-13 |                     |  |
| 6.12954578673852e-13 | 100                  | 99.9888068054623     |                     |  |
| MXD4-regulon         | B LY9                | 0.0664689315693134   | -0.0261063842197145 |  |
| 14152857             | 0.44876963644631     | 2.84080259993193e-06 |                     |  |
| 4.53251650775657e-06 | 86.5439093484419     | 88.6366689053056     |                     |  |
| MXI1-regulon         | B LY9                | 0.0809277970249861   | 0.0159463529345525  |  |
| 22162635.5           | 0.702749831784994    |                      |                     |  |
| 1.53862182367978e-76 | 2.73105373703161e-75 | 100                  | 100                 |  |
| MYBL1-regulon        | B LY9                |                      |                     |  |
| 0.024211347928036    | -0.00576862436290129 | 15809068             |                     |  |

|                      |                      |                      |
|----------------------|----------------------|----------------------|
| 0.501286044147481    | 0.906136505701988    | 0.932401331954219    |
| 84.8441926345609     | 79.9843295276472     |                      |
| MYC-regulon B LY9    | 0.287886137608992    | -0.0274222816324883  |
| 12271920             | 0.389127444508073    | 4.26754130666697e-24 |
| 1.08212654561913e-23 | 100                  | 100                  |
| NFATC1-regulon B LY9 |                      |                      |
| 0.0419662883614995   | -0.00868670930785328 | 14175883.5           |
| 0.449499778355723    | 3.98466786419813e-06 |                      |
| 6.21783337050698e-06 | 93.7677053824363     | 94.8444145959257     |
| NFE2L1-regulon B LY9 | 0.158270259248782    | -0.0247824709248002  |
| 13787074             | 0.437171108747751    | 9.59371007968311e-09 |
| 1.66134979428659e-08 | 100                  | 99.9350794716812     |
| NFE2L2-regulon B LY9 |                      |                      |
| 0.107043403599118    | -0.00389776995198539 | 15245482             |
| 0.483415427329532    | 0.129883471142663    | 0.148737523405308    |
| 100                  | 100                  |                      |
| NFKB1-regulon B LY9  |                      |                      |
| 0.0482209390804344   | -0.00858137419034707 | 13798368             |
| 0.437529227555425    | 1.16305544483112e-08 |                      |
| 1.98980570079542e-08 | 100                  | 99.9306021938661     |
| NFKB2-regulon B LY9  |                      |                      |
| 0.0716604738596836   | -0.00174324198363757 | 15471177             |
| 0.490571937361235    | 0.389236252469384    | 0.412680453621466    |
| 100                  | 100                  |                      |
| NFYA-regulon B LY9   |                      |                      |
| 0.0240164383042496   | 0.0240164383042496   | 0.0031165218221883   |
| 18405557.5           | 0.583617523152156    |                      |
| 2.23628646839572e-14 | 4.73959221659989e-14 | 99.8583569405099     |
| 99.0038056861428     |                      |                      |
| NFYB-regulon B LY9   |                      |                      |
| 0.0960069199428106   | 0.0960069199428106   | -0.0128174012516817  |
| 10056001             | 0.318863386585036    | 1.82704975445711e-61 |
| 1.62150665708068e-60 | 100                  | 100                  |
| NFYC-regulon B LY9   |                      |                      |
| 0.0784537811257311   | -0.00516126110024694 | 12667600.5           |
| 0.401673985049951    | 2.7203702552204e-19  | 6.4382096040216e-19  |
| 100                  | 100                  |                      |
| NR1H3-regulon B LY9  |                      |                      |
| 0.0135235967910218   | 0.0135235967910218   | 0.00506806192993417  |
| 17158537.5           | 0.544076057281252    |                      |
| 2.97496975798687e-08 | 5.02911554326352e-08 | 29.8866855524079     |
| 21.9811954331766     |                      |                      |
| NR2C2-regulon B LY9  |                      |                      |
| 0.025880181419748    | 0.025880181419748    | 0.00415871796069785  |
| 17749884             | 0.562826925308732    | 7.56999215992878e-09 |
| 1.32708504532085e-08 | 83.1444759206799     | 75.8652339377658     |
| NR3C1-regulon B LY9  |                      |                      |
| 0.228884570868929    | 0.228884570868929    | 0.0034608322102665   |
| 17018565.5           | 0.539637717831298    |                      |
| 0.000294764784603758 | 0.000427108157282996 | 100                  |
| 100                  | 100                  |                      |
| NRF1-regulon B LY9   |                      |                      |
| 0.0253682005187395   | -0.00138247521510297 | 14934859.5           |
| 0.473565971039749    | 0.0157763160588965   | 0.0189850583081635   |
| 100                  | 99.9664204163868     |                      |
| PAX5-regulon B LY9   |                      |                      |

|                           |                            |                     |
|---------------------------|----------------------------|---------------------|
| 0.0991539155588365        | -0.00113136628918666       | 14904161.5          |
| 0.472592575328931         | 0.0123165215575055         | 0.0152082266188329  |
| 100 100                   |                            |                     |
| POU2F1-regulon B LY9      | 0.00536587919107498        |                     |
| 0.000493577839889243      | 16387211.5                 | 0.519618261332237   |
| 0.00794685373443063       | 0.0101662453179203         | 22.2379603399433    |
| 18.2852025968211          |                            |                     |
| POU6F1-regulon B LY9      | 0.0330699883487345         | 0.00210054055422592 |
| 16458351.5                | 0.521874022973635          | 0.0413012007375378  |
| 0.0480718893830358        | 67.2804532577904           | 65.3234833221401    |
| REL-regulon B LY9         |                            |                     |
| 0.256830237585625         | -0.00699050896487607       | 13230497.5          |
| 0.419522754527853         | 1.98992881480518e-13       |                     |
| 4.03671273860479e-13      | 100 100                    |                     |
| RELA-regulon B LY9        | 0.0966544454257976         | 0.00466252749353435 |
| 19513610.5                | 0.618752516883333          |                     |
| 2.10850175821715e-27      | 6.50885325362686e-27       | 100 100             |
| RELB-regulon B LY9        |                            |                     |
| 0.0975715372900946        | -0.00773244982699933       | 11034156.5          |
| 0.349879490833313         | 8.90141807522195e-43       |                     |
| 4.86154371800584e-42      | 100 100                    |                     |
| REST-regulon B LY9        | 0.223656066877849          | 0.00511721292739156 |
| 19045370.5                | 0.603905204106158          |                     |
| 2.33268586053855e-21      | 5.81125249467498e-21       | 100 100             |
| RFX5-regulon B LY9        |                            |                     |
| 0.062659109453694         | -0.00273186988569875       | 15400530.5          |
| 0.488331823996053         | 0.286614227422774          | 0.313070925338722   |
| 100 100                   |                            |                     |
| RXRA-regulon B LY9        |                            |                     |
| 0.0133681762576946        | -0.00118032708418239       | 15435057.5          |
| 0.489426632573401         | 0.322948874197244          | 0.350066718595486   |
| 64.3059490084986          | 64.2623684799642           |                     |
| SETDB1-regulon B LY9      | 0.0598804651214988         |                     |
| 0.000165513408065754      | 15975565 0.506565458626084 |                     |
| 0.548761471316347         | 0.572971536227362          | 94.6175637393768    |
| 95.0593239310499          |                            |                     |
| SOX5-regulon B LY9        | 0.01007459150816           | 0.00230718521780054 |
| 16525146 0.52399199417066 | 0.00272501778244646        | 0.00361637873932148 |
| 26.7705382436261          | 22.4266845757779           |                     |
| SP1-regulon B LY9         | 0.0158687907031102         | 0.00292035443478778 |
| 17426516.5                | 0.552573340791235          |                     |
| 6.87409443446114e-07      | 1.10922887465168e-06       | 67.4220963172804    |
| 59.7022610252966          |                            |                     |
| SP2-regulon B LY9         | 0.0285792875727116         |                     |
| 0.000344490407320888      | 16090380 0.51020610063982  | 0.35130731955052    |
| 0.37792151042556 100      | 100                        |                     |
| SP3-regulon B LY9         | 0.0320239236145409         | 0.00381335485821492 |
| 19826220.5                | 0.628664994346327          |                     |
| 7.04934473617026e-32      | 2.44148037203946e-31       | 100 100             |
| SP4-regulon B LY9         | 0.0107409889140256         | 0.00213630309550755 |

|                      |                     |                       |                      |
|----------------------|---------------------|-----------------------|----------------------|
|                      | 16494117            | 0.523008102858165     | 0.00874853415573243  |
| 0.011091891518875    |                     | 32.8611898016997      | 28.9545556301769     |
| SPI1-regulon         | B LY9               | 0.417098725297297     | -0.0014670785009519  |
|                      | 14871009.5          | 0.471541366305377     | 0.00935111212072518  |
|                      | 0.0117509550543626  | 100                   | 100                  |
| SPIB-regulon         | B LY9               | 0.543666579225551     | -0.0211131377448872  |
|                      | 9088678.5           | 0.288190783403124     |                      |
| 2.32672786058816e-83 |                     | 5.50658927005865e-82  | 100 100              |
| SREBF1-regulon       | B LY9               |                       |                      |
| 0.0408346258340751   |                     | -9.67597350235022e-05 | 15767889             |
| 0.499980308856068    |                     | 0.998566325283668     | 0.998566325283668    |
|                      | 95.6090651558074    | 96.9151555854041      |                      |
| SREBF2-regulon       | B LY9               | 0.106219286986685     | 0.00735102676666725  |
|                      | 21039967.5          | 0.667151414432943     |                      |
| 1.31091093160434e-52 |                     | 9.7973343309377e-52   | 100 100              |
| SRF-regulon          | B LY9               | 0.0264879798855211    | 0.00580918822209148  |
|                      | 20112460.5          | 0.637741311639464     |                      |
| 2.75187005154692e-36 |                     | 1.22114233537394e-35  | 99.4334277620397     |
| 97.9113498992612     |                     |                       |                      |
| STAT1-regulon        | B LY9               | 0.0852750976774545    | 0.00559361789278565  |
|                      | 20072221            | 0.636465366734079     | 1.19550426547206e-35 |
| 4.99298840285389e-35 |                     | 100 100               |                      |
| STAT2-regulon        | B LY9               | 0.0727481816783633    | 0.00661677670682546  |
|                      | 18490815.5          | 0.58632094915753      | 3.19256165475648e-15 |
| 6.86884477235484e-15 |                     | 100 99.9619431385718  |                      |
| STAT5A-regulon       | B LY9               |                       |                      |
| 0.0643579059448316   |                     | -0.00736450591393296  | 12721387.5           |
| 0.403379504468082    |                     | 1.10708081017684e-18  |                      |
| 2.53557217814696e-18 |                     | 100 100               |                      |
| TBP-regulon          | B LY9               |                       |                      |
| 0.0208812273245853   |                     | -2.03546209970491e-05 | 15735226             |
| 0.498944605419282    |                     | 0.917894413855948     | 0.937705084658595    |
|                      | 47.8753541076487    | 49.9171703604209      |                      |
| TCF12-regulon        | B LY9               | 0.0112667708812332    | 0.00225819252535703  |
|                      | 16510915.5          | 0.523540762570465     | 0.00482621798338741  |
|                      | 0.00634558290408345 | 29.6033994334278      | 25.1511081262592     |
| TFDP1-regulon        | B LY9               | 0.501967610458996     | -0.0266097092606765  |
|                      | 9450503             | 0.299663791949905     | 8.99984549411758e-75 |
| 1.41997562240522e-73 |                     | 100 100               |                      |
| TFDP2-regulon        | B LY9               |                       |                      |
| 0.0263923914300598   |                     | -0.000742311834838371 | 15772065             |
| 0.500112724664537    |                     | 0.991787538788378     | 0.998566325283668    |
|                      | 100                 | 99.9955227221849      |                      |
| TFEC-regulon         | B LY9               | 0.101196742555401     | 0.00980779553618874  |
|                      | 20089707.5          | 0.63701984207766      | 6.32687120393725e-36 |
| 2.72247185139118e-35 |                     | 100 100               |                      |
| THAP1-regulon        | B LY9               | 0.0381256090392047    |                      |
| 0.000975676439812716 |                     | 16827735.5            | 0.533586733939985    |
| 0.00216030616524992  |                     | 0.00289399505156121   | 100 100              |
| THAP11-regulon       | B LY9               | 0.179499234331596     | 0.00103766936930905  |

|                       |                      |                       |     |
|-----------------------|----------------------|-----------------------|-----|
| 16340398.5            | 0.51813387885095     | 0.097711729662483     |     |
| 0.112805411480265     | 100                  | 100                   |     |
| TP53-regulon B LY9    |                      |                       |     |
| 0.0886814393239899    | -0.00982816819386267 | 11751997.5            |     |
| 0.372641343411648     | 2.87220551782131e-31 |                       |     |
| 9.71079008406251e-31  | 100                  | 100                   |     |
| USF2-regulon B LY9    | 0.136308913834113    | 0.0111969203287787    |     |
| 23005570.5            | 0.729478260786847    |                       |     |
| 1.62725580002886e-97  | 7.70234412013661e-96 | 100                   | 100 |
| XBP1-regulon B LY9    | 0.196349902989977    | 0.0010767900065701    |     |
| 19345929.5            | 0.613435559225317    |                       |     |
| 3.79559792601602e-25  | 1.01693378395146e-24 | 100                   | 100 |
| YBX1-regulon B LY9    |                      |                       |     |
| 0.0931361625274997    | -0.00207996134300149 | 14420220              |     |
| 0.457247387356193     | 9.44901415631102e-05 |                       |     |
| 0.000141237895810123  | 100                  | 100                   |     |
| YY1-regulon B LY9     | 0.616325541521492    | -0.0235116050664732   |     |
| 9991108               | 0.316805709607312    | 7.92887656602622e-63  |     |
| 7.50600314917149e-62  | 100                  | 100                   |     |
| YY2-regulon B LY9     | 0.0681126186732421   | 0.0173809905557293    |     |
| 20598009.5            | 0.653137471454183    |                       |     |
| 1.76885100759828e-44  | 1.00470737231582e-43 | 98.5835694050991      |     |
| 90.402955003358       |                      |                       |     |
| ZBTB33-regulon B LY9  | 0.372324368327533    | 0.00660105970448471   |     |
| 18228624.5            | 0.578007195987446    | 1.0491691157704e-12   |     |
| 2.06919464499162e-12  | 100                  | 100                   |     |
| ZNF143-regulon B LY9  | 0.0274598525303932   | 0.00419437651877764   |     |
| 20323322.5            | 0.644427485539217    |                       |     |
| 1.00667655039002e-39  | 4.92924379846146e-39 | 100                   |     |
| 99.9932840832774      |                      |                       |     |
| ZNF274-regulon B LY9  | 0.0709108734550072   | 0.00565736497111861   |     |
| 19416008.5            | 0.615657677865569    |                       |     |
| 4.45723072113761e-26  | 1.29168727020723e-25 | 100                   | 100 |
| ZNF76-regulon B LY9   | 0.015402915677565    |                       |     |
| 0.000859176861929859  | 16865076             | 0.534770755131588     |     |
| 0.00149635334020971   | 0.00204309782990172  | 99.7167138810198      |     |
| 99.4560107454668      |                      |                       |     |
| ATF1-regulon B PLCG2  | 0.0871437567811967   | -0.0193292470902561   |     |
| 4564108               | 0.175965860654914    | 1.20973008876125e-158 |     |
| 6.36228417052213e-158 | 100                  | 100                   |     |
| ATF3-regulon B PLCG2  | 0.0392293014639523   | -0.0119448970631449   |     |
| 7151722               | 0.275729434293554    | 5.20315747354451e-77  |     |
| 1.21122682171036e-76  | 100                  | 100                   |     |
| ATF4-regulon B PLCG2  | 0.0823730539372226   | -0.0267195311273126   |     |
| 4037541               | 0.155664453381582    | 7.01756249553629e-179 |     |
| 5.86172867274208e-178 | 100                  | 100                   |     |
| ATF5-regulon B PLCG2  | 0.0857556408142917   | -0.0331001604060155   |     |
| 5433261               | 0.209475421709517    | 6.35564462475142e-128 |     |
| 2.654416284455e-127   | 100                  | 99.997767707659       |     |
| ATF6-regulon B PLCG2  | 0.107592430001563    | -0.0291940328184539   |     |

|                       |                      |                   |                       |                       |
|-----------------------|----------------------|-------------------|-----------------------|-----------------------|
|                       | 2800020              | 0.107952732308476 |                       | 2.87952395120581e-231 |
| 1.36297467023742e-229 |                      | 100               | 100                   |                       |
| ATF6B-regulon         | B                    | PLCG2             | 0.0590832703108211    | 0.00180985270564116   |
|                       | 13989026.5625        |                   | 0.539336733222521     | 0.00112153066651685   |
|                       | 0.00131617648467266  |                   | 98.7910189982729      | 99.9352635221108      |
| BACH1-regulon         | B                    | PLCG2             | 0.0254820614996661    | -0.0180308489200338   |
|                       | 6500542.5            |                   | 0.250623682817398     |                       |
| 9.09738697871396e-95  |                      |                   | 2.53299794309291e-94  | 96.3730569948187      |
| 99.6048842556421      |                      |                   |                       |                       |
| BATF-regulon          | B                    | PLCG2             |                       |                       |
|                       | 0.0154053981599447   |                   | -0.00393820685793029  | 12272585              |
|                       | 0.473160578580874    |                   | 0.0182941728915585    | 0.0206172424650898    |
|                       | 47.1502590673575     |                   | 51.7757885572695      |                       |
| BATF3-regulon         | B                    | PLCG2             | 0.0555968900114848    | -0.0279230240903841   |
|                       | 6240676.5            |                   | 0.240604738404832     |                       |
| 2.23676944877867e-102 |                      |                   | 7.38654097038537e-102 | 100 100               |
| BCL11A-regulon        | B                    | PLCG2             | 0.183901824237746     | -0.0208647426164945   |
|                       | 7119117.5            |                   | 0.27447239153652      | 7.44207012543889e-78  |
| 1.7612899296872e-77   |                      |                   | 100                   | 100                   |
| BHLHE40-regulon       | B                    | PLCG2             | 0.03368961020649      | -0.0222454187951622   |
|                       | 4368874.5            |                   | 0.168438775218687     | 5.28073418974588e-166 |
| 3.26027936932137e-165 |                      |                   | 100                   | 100                   |
| BRF2-regulon          | B                    | PLCG2             | 0.0261619620884002    | -0.0156500688737452   |
|                       | 6423242.5            |                   | 0.247643437602205     |                       |
| 5.32867666703709e-97  |                      |                   | 1.54422874840667e-96  | 97.4093264248705      |
| 99.7589124271715      |                      |                   |                       |                       |
| CEBPB-regulon         | B                    | PLCG2             | 0.111183330114296     | -0.03232111000223     |
|                       | 2628032.5            |                   | 0.10132187947603      | 4.39103816659669e-239 |
| 3.11763709828365e-237 |                      |                   | 100                   | 100                   |
| CEBPG-regulon         | B                    | PLCG2             | 0.0492519139772856    | -0.0190519232451358   |
|                       | 6945203.5            |                   | 0.267767263899326     |                       |
| 1.93817514819295e-82  |                      |                   | 4.66476052615929e-82  | 100 100               |
| CLOCK-regulon         | B                    | PLCG2             | 0.016429862775358     |                       |
|                       | 0.000845929696433781 |                   | 12951552.5            | 0.499337676163625     |
|                       | 0.953451850417856    |                   | 0.960213920278975     | 49.2227979274611      |
| 51.117262316673       |                      |                   |                       |                       |
| CREB1-regulon         | B                    | PLCG2             |                       |                       |
|                       | 0.0397454591921645   |                   | -0.00326742975645598  | 11472244              |
|                       | 0.442304014081871    |                   | 1.76700956129561e-06  |                       |
| 2.22048989118563e-06  |                      |                   | 100                   | 99.993303122977       |
| CREB3-regulon         | B                    | PLCG2             | 0.191937389423649     | -0.0484812472038214   |
|                       | 2164634.5            |                   | 0.0834559070021613    |                       |
| 8.51230318611639e-261 |                      |                   | 1.20874705242853e-258 | 100 100               |
| CREB3L2-regulon       | B                    | PLCG2             | 0.100136289027772     | -0.026985246906415    |
|                       | 3025892.5            |                   | 0.116661082080387     |                       |
| 3.36009827371012e-221 |                      |                   | 9.54267909733674e-220 | 100 100               |
| CREB3L4-regulon       | B                    | PLCG2             | 0.01424521012266      | 0.00318449988420979   |
|                       | 13557681.5           |                   | 0.52270653841511      | 0.022228585715469     |
|                       | 0.0246534837278098   |                   | 34.3696027633851      | 31.3079000825948      |
| CREB5-regulon         | B                    | PLCG2             |                       |                       |

|                       |                      |                       |                      |
|-----------------------|----------------------|-----------------------|----------------------|
| 0.0299142887281885    |                      | -0.00937970956212293  | 9995386              |
| 0.385364829243323     |                      | 2.22097668950167e-21  |                      |
| 3.62504241274984e-21  |                      | 99.6545768566494      | 99.6227425943702     |
| CREM-regulon          | B PLCG2              | 0.121751591970336     | -0.0286130702523405  |
| 3747660.5             |                      | 0.144488321776112     |                      |
| 1.52214021689717e-190 |                      | 1.96494464363089e-189 | 100 100              |
| CTCF-regulon          | B PLCG2              | 0.356574827899285     | -0.0144498040067788  |
| 11068593              | 0.426741543689142    |                       | 1.30093598901681e-09 |
| 1.82903871723156e-09  |                      | 100 100               |                      |
| CUX1-regulon          | B PLCG2              | 0.0832787973714758    | 0.0066657876368756   |
| 16482541              | 0.635472366746123    |                       | 3.25814255623567e-29 |
| 5.78320303731832e-29  |                      | 100 100               |                      |
| DDIT3-regulon         | B PLCG2              | 0.0529203972400767    | -0.0324011705121235  |
| 3202361               | 0.123464696605061    |                       | 1.7156459154964e-213 |
| 2.70690800000544e-212 |                      | 100 100               |                      |
| E2F1-regulon          | B PLCG2              | 0.423188920423986     | -0.0146934979899566  |
| 11400196              | 0.439526255902514    |                       | 5.48705940983733e-07 |
| 6.95680746604376e-07  |                      | 100 100               |                      |
| E2F2-regulon          | B PLCG2              | 0.0676633429977206    | 0.0139199706473415   |
| 18421601              | 0.710231413149389    |                       | 6.75930047755103e-68 |
| 1.49971979345663e-67  |                      | 100 100               |                      |
| E2F3-regulon          | B PLCG2              | 0.0230154963542859    | 0.00192475395459239  |
| 14724587              | 0.567695730303307    |                       | 2.06369388637942e-08 |
| 2.73873394267176e-08  |                      | 100 100               |                      |
| E2F4-regulon          | B PLCG2              | 0.334761713566725     | -0.0647216597364801  |
| 4656064.5             | 0.179511176555702    |                       |                      |
| 3.09680697576457e-155 |                      | 1.57052353770918e-154 | 100 100              |
| E2F6-regulon          | B PLCG2              | 0.0523732545613102    | -0.0202868256956028  |
| 6612416               | 0.254936884150929    |                       | 1.38965638974017e-91 |
| 3.65428161746489e-91  |                      | 100 100               |                      |
| E2F7-regulon          | B PLCG2              | 0.0355421121515557    | 0.00503229726888751  |
| 16071313              | 0.61961777063547     | 3.89015997490562e-23  |                      |
| 6.5762228147214e-23   |                      | 100 100               |                      |
| E2F8-regulon          | B PLCG2              | 0.0898299497072593    | 0.0152276443938152   |
| 17490246              | 0.674323699276217    |                       | 3.00421051419671e-47 |
| 6.00842102839342e-47  |                      | 100 100               |                      |
| EGR1-regulon          | B PLCG2              |                       |                      |
| 0.0464093280594815    |                      | -0.00106729886715823  | 12240753             |
| 0.471933318998855     |                      | 0.0200993723158602    | 0.0224733139279697   |
| 100                   | 100                  |                       |                      |
| EGR2-regulon          | B PLCG2              |                       |                      |
| 0.038025777963995     |                      | -0.00812581657948196  | 9628235              |
| 0.37120958977368      | 1.46100202036288e-26 |                       | 2.56126280112998e-26 |
| 99.8272884283247      | 99.997767707659      |                       |                      |
| EGR3-regulon          | B PLCG2              |                       |                      |
| 0.0333081966887322    |                      | -0.00826845204679139  | 9234087              |
| 0.356013500626488     |                      | 8.76893337810527e-33  |                      |
| 1.63840597327756e-32  |                      | 99.8272884283247      | 99.997767707659      |
| ELF1-regulon          | B PLCG2              | 0.675748464401392     | -0.0317006779174678  |
| 10369716.5            |                      | 0.399796869107823     |                      |

|                       |                      |                       |     |
|-----------------------|----------------------|-----------------------|-----|
| 1.05127821350582e-16  | 1.62262506867203e-16 | 100                   | 100 |
| ELF2-regulon B PLCG2  |                      |                       |     |
| 0.0281367354457422    | -0.00457773875061314 | 11178118.5            |     |
| 0.430964219592333     | 1.08065345671261e-08 |                       |     |
| 1.44766783823765e-08  | 99.6545768566494     | 99.53345090073        |     |
| ELF4-regulon B PLCG2  | 0.0210822396810723   | 0.00266919687152296   |     |
| 14807475              | 0.570891416789684    | 4.32504659760378e-09  |     |
| 5.90535208518978e-09  | 98.272884283247      | 98.3369422059513      |     |
| ELK1-regulon B PLCG2  |                      |                       |     |
| 0.0570031017400558    | -0.00916886475424796 | 8606901.5             |     |
| 0.331832820349469     | 4.30309118645338e-44 |                       |     |
| 8.48665206217194e-44  | 100                  | 100                   |     |
| ELK3-regulon B PLCG2  | 0.0542660808122168   | -0.010776888917491    |     |
| 8345424.5             | 0.321751765004927    |                       |     |
| 2.55398976977029e-49  | 5.25603691749828e-49 | 100                   | 100 |
| ELK4-regulon B PLCG2  |                      |                       |     |
| 0.0355514284218947    | -0.00956768911332207 | 10262721              |     |
| 0.395671735512452     | 5.58979629683813e-18 |                       |     |
| 8.91855139495522e-18  | 90.846286701209      | 96.8055896600219      |     |
| ESRRA-regulon B PLCG2 | 0.066729282514555    | -0.0253296505559138   |     |
| 4511187               | 0.173925530033527    | 1.27146399945912e-160 |     |
| 6.94414953550751e-160 | 100                  | 100                   |     |
| ETS1-regulon B PLCG2  | 0.236930869136543    | -0.0060857916870467   |     |
| 12204826              | 0.470548179673548    | 0.0147196068469383    |     |
| 0.0167214733781219    | 100                  | 100                   |     |
| ETV2-regulon B PLCG2  | 0.0300881692822462   | 0.00150535188010127   |     |
| 14095186.5            | 0.543429652314106    |                       |     |
| 0.000322090650698727  | 0.000387600613552706 | 100                   | 100 |
| ETV3-regulon B PLCG2  | 0.0142733925428102   | 0.00288109996843053   |     |
| 14960752.5            | 0.576800919195528    |                       |     |
| 1.85488237855113e-10  | 2.63393297754261e-10 | 89.9827288428325      |     |
| 84.2757327499609      |                      |                       |     |
| ETV5-regulon B PLCG2  | 0.0383433171665207   | 0.00494274464989262   |     |
| 16829952              | 0.648866544889144    | 6.30999250966856e-35  |     |
| 1.21083640050397e-34  | 100                  | 100                   |     |
| ETV6-regulon B PLCG2  | 0.39425897994034     | -0.0661601215654362   |     |
| 3030899               | 0.116854104042481    | 5.58382561790212e-221 |     |
| 1.32150539623683e-219 | 100                  | 100                   |     |
| ETV7-regulon B PLCG2  |                      |                       |     |
| 0.0581250532929533    | -0.00602794304155881 | 10334755              |     |
| 0.398448953932002     | 4.08334869459637e-17 |                       |     |
| 6.44261682925205e-17  | 100                  | 100                   |     |
| FLI1-regulon B PLCG2  | 0.117110462170063    | -0.0271677147937451   |     |
| 5795874               | 0.223455701893435    | 4.29124342195258e-116 |     |
| 1.6035699103086e-115  | 100                  | 100                   |     |
| FOS-regulon B PLCG2   | 0.0701481356069804   | -0.0163378609332459   |     |
| 6525715               | 0.251594190225929    | 4.78821192232419e-94  |     |
| 1.30755017878853e-93  | 100                  | 100                   |     |
| FOSB-regulon B PLCG2  | 0.0283117530760479   | -0.0133318438234226   |     |
| 8287125.5             | 0.319504089509448    |                       |     |



|                       |                       |                       |
|-----------------------|-----------------------|-----------------------|
| 1.58781938954373e-50  | 3.31574048992955e-50  | 97.5820379965458      |
| 99.3459383440855      |                       |                       |
| FOSL1-regulon         | B PLCG2               | 0.042606254419732     |
| 6407101.5             | 0.247021133100026     | -0.0184225245382309   |
| 5.46216345018182e-97  | 100                   | 100                   |
| FOXO1-regulon         | B PLCG2               | 0.0248145027555498    |
| 14739114.5            | 0.568255827487831     | 0.00822243635643568   |
| 2.14781356363041e-09  | 2.99009339250508e-09  | 59.9309153713299      |
| 52.2445699488805      |                       |                       |
| FOXO3-regulon         | B PLCG2               |                       |
| 0.0164715484778633    | -0.00331465942423846  | 12150192.5            |
| 0.468441824861591     | 0.00456228695052983   | 0.00531020284405931   |
| 41.6234887737478      | 46.8267964372614      |                       |
| GABPA-regulon         | B PLCG2               | 0.0343967205371258    |
| 19477266              | 0.750931808558146     | 0.00902393944347293   |
| 1.78002100952973e-95  | 100                   | 100                   |
| GTF2B-regulon         | B PLCG2               | 0.0603703611436132    |
| 6795219               | 0.261984720710734     | -0.0189281434820706   |
| 4.19769396964792e-86  | 100                   | 100                   |
| HINFP-regulon         | B PLCG2               | 0.0216684324777642    |
| 14510600.5            | 0.559445636606788     | 0.00550817091076739   |
| 4.40888102471558e-07  | 5.64019013972623e-07  | 69.0846286701209      |
| 63.1582472040538      |                       |                       |
| HIVEP3-regulon        | B PLCG2               | 0.0537528105587042    |
| 7447080               | 0.287116746923167     | -0.0242445181328805   |
| 3.20786888847074e-69  | 97.2366148531952      | 1.4232094364342e-69   |
| HOXB2-regulon         | B PLCG2               | 0.0223990975595251    |
| 9298294               | 0.358488954760148     | 99.7254280420564      |
| 1.37676269147663e-31  | 65.2849740932643      | 7.4655441720916e-32   |
| IKZF1-regulon         | B PLCG2               | 0.125822098621396     |
| 5053641.5             | 0.194839468301121     | 83.9676764069022      |
| 6.2546919600239e-141  | 2.8650524462045e-140  | -0.0182752272438964   |
| IRF1-regulon          | B PLCG2               | 0.103232134955301     |
| 3998918.5             | 0.154175391016461     | -0.0326266262179958   |
| 2.05882698748979e-180 | 1.82720895139718e-179 | 100                   |
| IRF2-regulon          | B PLCG2               | 0.0606036592687004    |
| 4695364               | 0.181026340162876     | 100                   |
| 4.22637504213836e-153 | 100                   | 100                   |
| IRF3-regulon          | B PLCG2               | 0.117555230454498     |
| 3040740               | 0.117233516631908     | -0.0282517926295051   |
| 3.07173500293414e-219 | 100                   | 100                   |
| IRF4-regulon          | B PLCG2               | 0.0387608876573633    |
| 5245347.5             | 0.202230553543344     | -0.0199054570197407   |
| 2.78144692166477e-134 | 1.19686503901939e-133 | 99.6545768566494      |
| IRF5-regulon          | B PLCG2               | 0.0183506996259275    |
| 6938604.5             | 0.267512844259286     | 100                   |
| 3.20480912774375e-83  | 7.84625682999333e-83  | -0.0290649266270362   |
| 80.8580931758823      |                       | 51.1226252158895      |
| IRF7-regulon          | B PLCG2               | 0.0816200201753387    |
| 4411473               | 0.170081129368744     | -0.0265534989987859   |
|                       |                       | 2.20277581061877e-164 |

|                       |                       |                       |                     |
|-----------------------|-----------------------|-----------------------|---------------------|
| 1.25117666043146e-163 | 100                   | 100                   |                     |
| IRF8-regulon B PLCG2  | 0.0867656421934963    |                       | 0.0050572483085987  |
| 15390579.5            | 0.593372586208605     |                       |                     |
| 1.04927152211533e-14  | 1.56838480147766e-14  | 100                   | 100                 |
| IRF9-regulon B PLCG2  |                       |                       |                     |
| 0.0304236215199486    | -0.00353774136712598  |                       | 10864444            |
| 0.418870727642098     | 1.82794761696189e-11  |                       |                     |
| 2.64865879192436e-11  | 100                   | 100                   |                     |
| JUN-regulon B PLCG2   | 0.0690590303366398    |                       | -0.019591238166566  |
| 5205003.5             | 0.200675119999207     |                       |                     |
| 1.14476061648371e-135 | 5.07987523564648e-135 | 100                   | 100                 |
| JUNB-regulon B PLCG2  | 0.124530261141009     |                       | -0.0357078637247948 |
| 3992693.5             | 0.153935390674099     |                       |                     |
| 1.16409350024142e-180 | 1.10200851356188e-179 | 100                   | 100                 |
| JUND-regulon B PLCG2  | 0.041527774830558     |                       | 0.00310976787316639 |
| 14420487.5            | 0.555971395506183     |                       |                     |
| 3.55967570080689e-06  | 4.43398201328578e-06  | 100                   | 100                 |
| KLF11-regulon B PLCG2 |                       |                       |                     |
| 0.0132597287853594    | -0.00878890595257688  |                       | 11166092            |
| 0.430500546641744     | 1.02561937950465e-10  |                       |                     |
| 1.47109042312789e-10  | 28.3246977547496      | 41.020604             | 40583075            |
| KLF12-regulon B PLCG2 | 0.0509233377968183    |                       | 0.0039237805853281  |
| 14003389.5            | 0.539890485819681     |                       |                     |
| 0.000954033376063235  | 0.00112893949500816   |                       | 98.1001727115717    |
| 98.6092818715539      |                       |                       |                     |
| KLF13-regulon B PLCG2 | 0.0547163028434213    |                       | -0.0117254127568881 |
| 6418076               | 0.247444246956613     | 3.7713000             | 0.1861026e-97       |
| 1.11567625550554e-96  | 100                   | 100                   |                     |
| KLF2-regulon B PLCG2  | 0.0809047894876136    |                       | -0.0283047475711034 |
| 4858751.5             | 0.187325626257279     |                       |                     |
| 7.43291695948149e-148 | 3.51824736082124e-147 | 100                   | 100                 |
| KLF3-regulon B PLCG2  | 0.0514038591921044    |                       | -0.0208919402539864 |
| 8275499.5             | 0.319055857544741     |                       |                     |
| 9.08747938657039e-51  | 1.92600309387014e-50  |                       | 98.6183074265976    |
| 99.8794562135857      |                       |                       |                     |
| KLF4-regulon B PLCG2  | 0.0184791363053017    |                       | 0.00261268264505664 |
| 13494666.5            | 0.520277040973514     |                       | 0.0723758056518028  |
| 0.07845316337829      | 52.3316062176166      | 49.7801192            | 0.04411             |
| KLF6-regulon B PLCG2  | 0.0383773375094813    |                       | -0.0314032464481932 |
| 4159598               | 0.160370272142653     | 4.42723495260694e-174 |                     |
| 3.30877559615887e-173 | 100                   | 100                   |                     |
| KLF7-regulon B PLCG2  | 0.0306470474446675    |                       | -0.0155501106795069 |
| 8354057               | 0.322084584756805     | 3.83606312468641e-49  |                     |
| 7.78172805293529e-49  | 92.9188255613126      | 97.6159117798067      |                     |
| KLF8-regulon B PLCG2  |                       |                       |                     |
| 0.0155287174285447    | -0.00970180173460396  |                       | 10007537.5          |
| 0.385833321477895     | 1.93169677627715e-21  |                       |                     |
| 3.18954583989948e-21  | 64.9395509499137      | 77.7998526687055      |                     |
| MAFB-regulon B PLCG2  | 0.0643496683898074    |                       | 0.00867748818939677 |
| 16272825.5            | 0.627386938344741     |                       |                     |

5.06791606228267e-26      8.67041061257998e-26      100  
99.997767707659  
MAFF-regulon      B PLCG2      0.0143624332362135      0.00200102563500503  
13372647      0.515572667997637      0.105604215065898  
0.112750364957575      31.2607944732297      28.5108377793156  
MAFG-regulon      B PLCG2  
0.0166537024894986      -0.00886679086546033      10441506.5  
0.402564680285038      5.66095635057854e-17  
8.83358023936432e-17      42.1416234887737      58.8142063084582  
MAX-regulon      B PLCG2      0.170829333795342      -0.0271877937651774  
3910251      0.150756880115839      5.89209042276848e-184  
5.97626314309374e-183      100      100  
MAZ-regulon      B PLCG2  
0.133351557033652      -0.00299041391158913      12191937.5  
0.470051272940611      0.0131250107428836      0.0150302542378183  
100      100  
MEF2A-regulon      B PLCG2      0.0413321229188857      0.0005852758051463  
13055725.5      0.503353990326656      0.781183786282921  
0.798043868001258      100      99.997767707659  
MLX-regulon      B PLCG2  
0.044020750117586      -0.00901980076593771      9337810  
0.36001246536718      4.43030260628667e-31      7.96332873535072e-31  
99.6545768566494      99.993303122977  
MXD4-regulon      B PLCG2      0.0539508300265227      -0.0387122699890688  
9636367.5      0.371523132389625  
1.77450227208371e-26      3.07291856873032e-26      73.4024179620035  
88.800589325178  
MXI1-regulon      B PLCG2      0.0465402053235162      -0.0189309055396441  
6776377.5      0.261258300397383  
5.12201326117624e-87      1.29879621979826e-86      100      100  
MYBL1-regulon      B PLCG2      0.0650921965831417      0.0356569622582601  
19940145      0.76877771364917      1.23448056055551e-110  
4.17371999044958e-110      96.0276338514681      79.8535616224301  
MYC-regulon      B PLCG2      0.2483351413056      -0.0674067310039951  
4120177.5      0.158850443468584      1.26796994756828e-175  
1.00028740308164e-174      100      100  
NFATC1-regulon      B PLCG2  
0.0412370013881167      -0.00940079537661053      11111650.5  
0.428401594249985      3.02554330379562e-09  
4.17113737028134e-09      91.0189982728843      94.8768890773936  
NFE2L1-regulon      B PLCG2      0.0784473183581414      -0.105566862559201  
2980756      0.114920877188336      3.40937268723625e-223  
1.21032730396887e-221      96.7184801381693      99.97767707659  
NFE2L2-regulon      B PLCG2      0.0800438785930261      -0.0312352128587094  
3753254      0.144703975095791      2.5765140153374e-190  
3.04887491814925e-189      100      100  
NFKB1-regulon      B PLCG2      0.0315428614794441      -0.0254506871956903  
5851900      0.225615743528964      2.56133073395778e-114  
9.32587087748731e-114      99.4818652849741      99.9374958144519  
NFKB2-regulon      B PLCG2      0.046686432001988      -0.0270351305387389

|                       |                  |                       |                    |                       |
|-----------------------|------------------|-----------------------|--------------------|-----------------------|
|                       | 4179971          | 0.161155738323366     |                    | 2.7598970603997e-173  |
| 1.95952691288379e-172 | 100              | 100                   |                    |                       |
| NFYA-regulon          | B                | PLCG2                 |                    |                       |
| 0.0189532691245406    |                  | -0.00202092405521179  |                    | 11669846.5            |
| 0.449922434588148     |                  | 3.36218622171533e-05  |                    |                       |
| 4.15156907377023e-05  |                  | 98.4455958549223      |                    | 99.0244882469808      |
| NFYB-regulon          | B                | PLCG2                 | 0.120089166406677  | 0.0116124450662268    |
|                       | 15864707         | 0.611652226742454     |                    | 2.3074674472976e-20   |
| 3.72341338086658e-20  | 100              | 100                   |                    |                       |
| NFYC-regulon          | B                | PLCG2                 |                    |                       |
| 0.081947516502174     |                  | -0.00160773705619925  |                    | 12321536              |
| 0.475047848742955     |                  | 0.0387773733316485    |                    | 0.0426851706441402    |
|                       | 100              | 100                   |                    |                       |
| NR1H3-regulon         | B                | PLCG2                 |                    |                       |
| 0.00838620372562142   |                  | -0.000150099813055492 |                    | 12759570              |
| 0.491935930665231     |                  | 0.357734890799902     |                    | 0.379092197713328     |
|                       | 20.2072538860104 | 22.1287139763823      |                    |                       |
| NR2C2-regulon         | B                | PLCG2                 |                    |                       |
| 0.0213297989606998    |                  | -0.00046226807950079  |                    | 12688153.5            |
| 0.489182519508558     |                  | 0.366961623474718     |                    | 0.385989263210444     |
|                       | 73.4024179620035 | 76.0117865035605      |                    |                       |
| NR3C1-regulon         | B                | PLCG2                 | 0.206330098628041  | -0.0193949674659004   |
|                       | 6749693.5        | 0.260229518206927     |                    |                       |
| 9.42656569005466e-88  |                  | 2.43376786906866e-87  |                    | 100 100               |
| NRF1-regulon          | B                | PLCG2                 | 0.0281586460473722 | 0.00144795607850055   |
|                       | 13477072         | 0.519598697837179     |                    | 0.104553640048636     |
| 0.112474370355351     |                  | 100                   |                    | 99.9665156148849      |
| PAX5-regulon          | B                | PLCG2                 |                    |                       |
| 0.098029866218124     |                  | -0.00226673650070623  |                    | 11812064.5            |
| 0.455405546024297     |                  | 0.000221343659219032  |                    |                       |
| 0.000268639312898312  |                  | 100                   |                    | 100                   |
| POU2F1-regulon        | B                | PLCG2                 | 0.0580989483610636 | 0.0539068211881433    |
|                       | 18874708         | 0.727700623611492     |                    | 8.9716894266911e-172  |
| 6.06657094566732e-171 |                  | 57.5129533678757      |                    | 17.8404803893118      |
| POU6F1-regulon        | B                | PLCG2                 |                    |                       |
| 0.0309527924028667    |                  | -4.99751474971125e-05 |                    | 12816596.5            |
| 0.494134545849762     |                  | 0.619750298290346     |                    | 0.637714075052385     |
|                       | 61.8307426597582 | 65.3994687144228      |                    |                       |
| REL-regulon           | B                | PLCG2                 | 0.222929812646891  | -0.0413092777971962   |
|                       | 3605773          | 0.139017952526814     |                    | 2.17742530620489e-196 |
| 3.09194393481094e-195 |                  | 100                   |                    | 100                   |
| RELA-regulon          | B                | PLCG2                 | 0.0805747984543741 | -0.0116381667932928   |
|                       | 6280705          | 0.242148008076195     |                    | 3.47664351175672e-101 |
| 1.09707417482101e-100 |                  | 100                   |                    | 100                   |
| RELB-regulon          | B                | PLCG2                 | 0.0951186677189491 | -0.0101951010878487   |
|                       | 8828646          | 0.34038201808712      |                    | 6.76245029439224e-40  |
| 1.3154355367174e-39   |                  | 100                   |                    | 100                   |
| REST-regulon          | B                | PLCG2                 | 0.192551186362723  | -0.0264042046741469   |
|                       | 4403148          | 0.169760165055464     |                    | 1.06402558940851e-164 |
| 6.29548473733369e-164 |                  | 100                   |                    | 100                   |

|                       |   |       |                       |                       |
|-----------------------|---|-------|-----------------------|-----------------------|
| RFX5-regulon          | B | PLCG2 | 0.0720661769286686    | 0.00680452856107068   |
| 15313685.5            |   |       | 0.590407994027789     |                       |
| 7.01389921776197e-14  |   |       | 1.03747259262729e-13  | 100 100               |
| RXRA-regulon          | B | PLCG2 |                       |                       |
| 0.0143354119174499    |   |       | -0.000197243689384846 | 12903448.5            |
| 0.497483061469813     |   |       | 0.831032050946325     | 0.842903937388415     |
| 64.9395509499137      |   |       | 64.2543027434873      |                       |
| SETDB1-regulon        | B | PLCG2 | 0.0548193077266681    | -0.0049615285400705   |
| 11879973              |   |       | 0.458023708795267     | 0.000507624982396652  |
| 0.000605737373952307  |   |       | 90.3281519861831      | 95.1135120655401      |
| SOX5-regulon          | B | PLCG2 | 0.0132126301672144    | 0.00547924204461027   |
| 14568023              |   |       | 0.561659519282977     | 2.83819158926214e-12  |
| 4.15487840902292e-12  |   |       | 34.1968911917098      | 22.3430140411188      |
| SP1-regulon           | B | PLCG2 | 0.0146950547196828    | 0.00172316870812707   |
| 13586153.5            |   |       | 0.523804255643661     | 0.0414807701165103    |
| 0.0453097642811113    |   |       | 62.0034542314335      | 59.7941826461593      |
| SP2-regulon           | B | PLCG2 | 0.0305858026500608    | 0.0023759630029873    |
| 14803307.5            |   |       | 0.570730741861685     |                       |
| 4.68656423380618e-09  |   |       | 6.33802020190931e-09  | 100 100               |
| SP3-regulon           | B | PLCG2 | 0.0286892658879458    |                       |
| 0.000424785867680442  |   |       | 13230240.5            | 0.510082289081241     |
| 0.403708695118379     |   |       | 0.42151937284419      | 100 100               |
| SP4-regulon           | B | PLCG2 | 0.0142347920578061    | 0.00566920710602286   |
| 14361094.5            |   |       | 0.553681541637283     |                       |
| 2.90037708651616e-08  |   |       | 3.77847290169995e-08  | 37.6511226252159      |
| 28.9037212313325      |   |       |                       |                       |
| SPI1-regulon          | B | PLCG2 | 0.379040979258869     | -0.0400125606821262   |
| 6596437.5             |   |       | 0.254320844717928     |                       |
| 4.91514210742091e-92  |   |       | 1.31688713066749e-91  | 100 100               |
| SP1B-regulon          | B | PLCG2 | 0.512573880151348     | -0.052547853120859    |
| 5903774               |   |       | 0.227615707827709     | 1.09743613673179e-112 |
| 3.80087637599789e-112 |   |       | 100 100               |                       |
| SREBF1-regulon        | B | PLCG2 |                       |                       |
| 0.0326778230862634    |   |       | -0.00835871462035849  | 9946894.5             |
| 0.383495274769163     |   |       | 4.95917297991049e-22  |                       |
| 8.28473603702694e-22  |   |       | 88.7737478411054      | 96.9997990936893      |
| SREBF2-regulon        | B | PLCG2 |                       |                       |
| 0.0904959109572208    |   |       | -0.00859641371176516  | 8160166               |
| 0.314609258430557     |   |       | 3.32470875480937e-53  |                       |
| 7.15316126034743e-53  |   |       | 100 100               |                       |
| SRF-regulon           | B | PLCG2 | 0.0207944022384556    |                       |
| 2.55521255347058e-05  |   |       | 12955097              | 0.499474331780252     |
| 0.965275410826659     |   |       | 0.965275410826659     | 97.5820379965458      |
| 97.9395941692524      |   |       |                       |                       |
| STAT1-regulon         | B | PLCG2 | 0.0616514931191323    | -0.018351179078235    |
| 4332435.5             |   |       | 0.167033896106184     |                       |
| 2.13963767546109e-167 |   |       | 1.38103886325216e-166 | 100 100               |
| STAT2-regulon         | B | PLCG2 | 0.0534774701773057    | -0.0129217668499698   |
| 9137459               |   |       | 0.352288078444681     | 2.05782016880362e-34  |
| 3.89613951960152e-34  |   |       | 99.4818652849741      | 99.9687479072259      |

|                       |                       |                       |                       |                     |
|-----------------------|-----------------------|-----------------------|-----------------------|---------------------|
| STAT5A-regulon        | B                     | PLCG2                 | 0.0534170957867485    | -0.0184258472868398 |
| 5769739               | 0.222448085998234     |                       | 6.30116425706609e-117 |                     |
| 2.41828466081996e-116 | 100                   | 100                   |                       |                     |
| TBP-regulon           | B                     | PLCG2                 | 0.0260107839080181    | 0.00517555904658587 |
| 14074151              | 0.542618643928282     |                       | 0.000159846754417938  |                     |
| 0.000195674475235751  | 55.440414507772       | 49.8136035895261      |                       |                     |
| TCF12-regulon         | B                     | PLCG2                 |                       |                     |
| 0.00878301961355565   | -0.000264063160801775 | 12829066              |                       |                     |
| 0.494615298342787     | 0.558781765527765     | 0.579175260620019     |                       |                     |
| 24.006908462867       | 25.2360649150613      |                       |                       |                     |
| TFDP1-regulon         | B                     | PLCG2                 | 0.506480880185866     | -0.0219626668202766 |
| 10499422              | 0.404797570217257     | 3.15326362720295e-15  |                       |                     |
| 4.76344079854063e-15  | 100                   | 100                   |                       |                     |
| TFDP2-regulon         | B                     | PLCG2                 | 0.0368623262394333    | 0.00986505105805966 |
| 18602134              | 0.71719173151206      | 2.42500850312631e-72  |                       |                     |
| 5.55405173296672e-72  | 100                   | 99.995535415318       |                       |                     |
| TFEC-regulon          | B                     | PLCG2                 | 0.0571498320672161    | -0.0348362252764764 |
| 3144328.5             | 0.121227295823034     |                       |                       |                     |
| 5.18551792642427e-216 | 9.20429431940308e-215 | 100                   | 100                   |                     |
| THAP1-regulon         | B                     | PLCG2                 |                       |                     |
| 0.0349301192302052    | -0.00226388104129132  | 11221494.5            |                       |                     |
| 0.432636549688765     | 2.41827937354937e-08  |                       |                       |                     |
| 3.17958954670381e-08  | 100                   | 100                   |                       |                     |
| THAP11-regulon        | B                     | PLCG2                 | 0.159861634806353     | -0.0188566873971558 |
| 5437870.5             | 0.209653137625681     |                       |                       |                     |
| 9.06126595770114e-128 | 3.67628504569589e-127 | 100                   | 100                   |                     |
| TP53-regulon          | B                     | PLCG2                 | 0.0758662726958416    | -0.0227811075326184 |
| 5880560               | 0.226720708960626     | 2.04905498093908e-113 |                       |                     |
| 7.27414518233375e-113 | 100                   | 100                   |                       |                     |
| USF2-regulon          | B                     | PLCG2                 | 0.11132446223991      | -0.0141421980144215 |
| 6278068               | 0.242046340461286     | 2.90324918171836e-101 |                       |                     |
| 9.36957690463652e-101 | 100                   | 100                   |                       |                     |
| XBP1-regulon          | B                     | PLCG2                 | 0.162757049964002     | -0.0329533024379572 |
| 3793007.5             | 0.146236642342391     |                       |                       |                     |
| 1.07541050676363e-188 | 1.17467916892642e-187 | 100                   | 100                   |                     |
| YBX1-regulon          | B                     | PLCG2                 |                       |                     |
| 0.0935089045252694    | -0.00169650495124844  | 12124349              |                       |                     |
| 0.467445447536638     | 0.00701409666350907   | 0.00809757500990479   |                       |                     |
| 100                   | 100                   |                       |                       |                     |
| YY1-regulon           | B                     | PLCG2                 | 0.575416899524749     | -0.0648823344769417 |
| 6293614               | 0.242645705171705     | 8.39305213573009e-101 |                       |                     |
| 2.59089870276885e-100 | 100                   | 100                   |                       |                     |
| YY2-regulon           | B                     | PLCG2                 | 0.0393232723545075    | -0.0118297325810763 |
| 10381356              | 0.4002456215552       | 1.39471028927565e-16  |                       |                     |
| 2.12955764599078e-16  | 82.2107081174439      | 90.6377659218251      |                       |                     |
| ZBTB33-regulon        | B                     | PLCG2                 | 0.326915080321346     | -0.039413856186116  |
| 5690045.5             | 0.219375561133331     |                       |                       |                     |
| 1.73864052396675e-119 | 6.85797095564663e-119 | 100                   | 100                   |                     |
| ZNF143-regulon        | B                     | PLCG2                 | 0.025200806564276     | 0.00189424134060901 |
| 14618571.5            | 0.563608379894364     |                       |                       |                     |

|                                   |                       |                      |
|-----------------------------------|-----------------------|----------------------|
| 1.37873233423515e-07              | 1.77981810419447e-07  | 100                  |
| 99.993303122977                   |                       |                      |
| ZNF274-regulon B PLCG2            |                       |                      |
| 0.0577573738599807                | -0.00768218193995263  | 9326296              |
| 0.359568551480922                 | 2.88182648617596e-31  |                      |
| 5.24640206457675e-31              | 100 100               |                      |
| ZNF76-regulon B PLCG2             | 0.0205104344242471    | 0.00603027437265563  |
| 17840571.5                        | 0.687830243844589     |                      |
| 1.44543701741842e-54              | 3.15772394574485e-54  | 100                  |
| 99.4530883764538                  |                       |                      |
| ATF1-regulon DZ 1                 |                       |                      |
| 0.100154478665602                 | -0.00627603110877981  | 24188400.5           |
| 0.373298524300733                 | 8.8653589598573e-62   |                      |
| 1.18762355877334e-61              | 100 100               |                      |
| ATF3-regulon DZ 1                 | 0.0319933866222915    | -0.0196681645920935  |
| 7991621.5                         | 0.123334344191961     | 0 0 100              |
| 100                               |                       |                      |
| ATF4-regulon DZ 1                 | 0.0881129055656642    | -0.0213326498500696  |
| 12119862.5                        | 0.187045306529375     | 0 0 100              |
| 100                               |                       |                      |
| ATF5-regulon DZ 1                 |                       |                      |
| 0.113410395816036                 | -0.00519192990316961  | 29597215             |
| 0.456772521312912                 | 1.52624061915114e-08  |                      |
| 1.61735946208554e-08              | 100 99.997722095672   |                      |
| ATF6-regulon DZ 1                 | 0.11794917693632      | -0.0190855885935479  |
| 10946814 0.168941700464841        | 0 0                   | 100 100              |
| ATF6B-regulon DZ 1                |                       |                      |
| 0.0509597244498521                | -0.00654984157933301  | 11891315.5214844     |
| 0.183518151031298                 | 0 0 100               | 99.9179954441913     |
| BACH1-regulon DZ 1                | 0.015803014810626     | -0.0284037440007435  |
| 7084763 0.109338836725497         | 0                     | 0                    |
| 96.3414634146341 99.6719817767654 |                       |                      |
| BATF-regulon DZ 1                 | 0.00855574024396562   | -0.0110986316676576  |
| 23881518.5                        | 0.36856242785093      | 1.59796028652145e-74 |
| 2.2920238453136e-74               | 28.6585365853659      | 52.4920273348519     |
| BATF3-regulon DZ 1                | 0.0867151391165874    | 0.00367093305731661  |
| 39055436.5                        | 0.602740838997228     |                      |
| 3.11899605385239e-41              | 3.7218272239247e-41   | 100 100              |
| BCL11A-regulon DZ 1               | 0.193465100367571     | -0.0114062564310747  |
| 20818268 0.32128741720219         | 4.92637644926441e-121 |                      |
| 7.86006130107356e-121             | 100 100               |                      |
| BHLHE40-regulon DZ 1              | 0.0315236440259714    | -0.0249387450381343  |
| 6679003.5                         | 0.103076768153786     | 0 0 100              |
| 100                               |                       |                      |
| BRF2-regulon DZ 1                 | 0.0312721106255504    | -0.0106878823534267  |
| 19968847 0.3081783401547          | 3.87258887951561e-139 |                      |
| 6.4695014222496e-139              | 99.8644986449865      | 99.7243735763098     |
| CEBPB-regulon DZ 1                | 0.116901410866619     | -0.0270711875296699  |
| 6997999.5                         | 0.107999819434413     | 0 0 100              |
| 100                               |                       |                      |

|                       |                   |                       |                       |                     |
|-----------------------|-------------------|-----------------------|-----------------------|---------------------|
| CEBPG-regulon         | DZ 1              |                       |                       |                     |
| 0.0645524026309115    |                   | -0.00362628775547649  |                       | 32204688            |
| 0.497013537789136     |                   | 0.695845597421511     |                       | 0.700780672580529   |
| 100                   | 100               |                       |                       |                     |
| CLOCK-regulon         | DZ 1              | 0.004421870212973     |                       | -0.0115485092915635 |
| 22117584              | 0.341339704057633 |                       | 3.02527352827325e-108 |                     |
| 4.72075649466814e-108 |                   | 25.6775067750677      | 51.9476082004556      |                     |
| CREB1-regulon         | DZ 1              |                       |                       |                     |
| 0.0398414777501404    |                   | -0.00323494561989168  |                       | 28516096            |
| 0.440087659190943     |                   | 4.41035779765276e-15  |                       |                     |
| 4.85481245943172e-15  | 100               | 99.9931662870159      |                       |                     |
| CREB3-regulon         | DZ 1              | 0.223339994342704     |                       | -0.0170134357672554 |
| 17815185              | 0.274940968942719 |                       | 9.15453877213363e-191 |                     |
| 1.85706357948996e-190 | 100               | 100                   |                       |                     |
| CREB3L2-regulon       | DZ 1              | 0.106143636820433     |                       | -0.0213273050621158 |
| 7532371               | 0.11624675136273  | 0                     | 0                     | 100 100             |
| CREB3L4-regulon       | DZ 1              | 0.00217036802402656   |                       | -0.0092312527051172 |
| 24975004.5            |                   | 0.38543814934163      | 2.77830025472808e-74  |                     |
| 3.94518636171388e-74  |                   | 10.4336043360434      | 32.0501138952164      |                     |
| CREB5-regulon         | DZ 1              | 0.0213646392831573    |                       | -0.0184084679378624 |
| 15182611              | 0.234312569834127 |                       | 5.0235006891168e-265  |                     |
| 1.13228110770569e-264 |                   | 98.7127371273713      | 99.6537585421412      |                     |
| CREM-regulon          | DZ 1              | 0.156752302061446     |                       | 0.00697978389521944 |
| 41211572.5            |                   | 0.636016391342729     |                       |                     |
| 6.47545282204776e-71  |                   | 9.0148460855959e-71   | 100                   | 100                 |
| CTCF-regulon          | DZ 1              | 0.445277894086636     |                       | 0.0769403749709687  |
| 62741065.5            |                   | 0.968280112784044     | 0                     | 0 100               |
| 100                   |                   |                       |                       |                     |
| CUX1-regulon          | DZ 1              | 0.103880474316327     |                       | 0.0280963321598793  |
| 57706696.5            |                   | 0.890584916754634     | 0                     | 0 100               |
| 100                   |                   |                       |                       |                     |
| DDIT3-regulon         | DZ 1              | 0.0644568728709937    |                       | -0.0211388637176105 |
| 13865305              | 0.213982644097512 |                       | 8.6051031212722e-307  |                     |
| 2.07105871732314e-306 | 100               | 100                   |                       |                     |
| E2F1-regulon          | DZ 1              | 0.587277235119036     |                       | 0.154611543010171   |
| 63639538.5            |                   | 0.982146207196696     | 0                     | 0 100               |
| 100                   |                   |                       |                       |                     |
| E2F2-regulon          | DZ 1              | 0.106355701470562     |                       | 0.0541976624863925  |
| 64241482              | 0.991435974838108 | 0                     | 0                     | 100 100             |
| E2F3-regulon          | DZ 1              |                       |                       |                     |
| 0.0156820587023468    |                   | -0.00561591945308678  |                       | 18476855.5          |
| 0.285152500756215     |                   | 4.97248628429961e-174 |                       |                     |
| 9.29069805750717e-174 | 100               | 100                   |                       |                     |
| E2F4-regulon          | DZ 1              | 0.41157770740461      | 0.0133545864504041    |                     |
| 42251852.5            | 0.652070986968412 |                       | 3.57559473805864e-88  |                     |
| 5.28890055004507e-88  | 100               | 100                   |                       |                     |
| E2F6-regulon          | DZ 1              |                       |                       |                     |
| 0.0643134147419047    |                   | -0.00835973171597405  |                       | 28808741            |
| 0.444604036644011     |                   | 4.12263303165674e-13  |                       |                     |
| 4.50318377304043e-13  | 100               | 100                   |                       |                     |



|                       |                   |                       |                     |
|-----------------------|-------------------|-----------------------|---------------------|
| E2F7-regulon          | DZ 1              | 0.0481064095140929    | 0.0181218537101787  |
| 56807063.5            |                   | 0.876700920112846     | 0 0 100             |
| 100                   |                   |                       |                     |
| E2F8-regulon          | DZ 1              | 0.148144522382903     | 0.0758140053676476  |
| 64401204.5            |                   | 0.993900965177078     | 0 0 100             |
| 100                   |                   |                       |                     |
| EGR1-regulon          | DZ 1              |                       |                     |
| 0.0403002141373164    |                   | -0.00740362051672551  | 18137641            |
| 0.279917418251631     |                   | 1.63682309136159e-182 |                     |
| 3.18395724621022e-182 |                   | 100 100               |                     |
| EGR2-regulon          | DZ 1              | 0.0336194507883291    | -0.0128463259051041 |
| 17617363.5            |                   | 0.271887998407319     |                     |
| 6.42431490213443e-196 |                   | 1.32210538565665e-195 | 99.9322493224932    |
| 99.997722095672       |                   |                       |                     |
| EGR3-regulon          | DZ 1              | 0.0241170547043478    | -0.0179375650347048 |
| 11432483.5            |                   | 0.176437016562649     | 0 0                 |
| 99.9322493224932      | 99.997722095672   |                       |                     |
| ELF1-regulon          | DZ 1              | 0.793936448880426     | 0.0898132736913855  |
| 61677024.5            |                   | 0.951858814687236     | 0 0 100             |
| 100                   |                   |                       |                     |
| ELF2-regulon          | DZ 1              | 0.0146905691577894    | -0.0185695262936985 |
| 11753598              | 0.181392762560883 | 0                     | 0                   |
| 98.1707317073171      | 99.5808656036446  |                       |                     |
| ELF4-regulon          | DZ 1              |                       |                     |
| 0.013123690100021     |                   | -0.00550239484137061  | 22413766.5          |
| 0.345910675593089     |                   | 1.76987338125882e-90  |                     |
| 2.64549494882897e-90  |                   | 96.6124661246612      | 98.3940774487472    |
| ELK1-regulon          | DZ 1              | 0.0671315233120055    | 0.00111274767318324 |
| 34235316.5            |                   | 0.528352138390404     |                     |
| 0.000206142963113165  |                   | 0.000213666428920215  | 100 100             |
| ELK3-regulon          | DZ 1              | 0.051202626008023     | -0.0141635448298849 |
| 16171940.5            |                   | 0.249580848627393     |                     |
| 1.11630972681412e-235 |                   | 2.43870740319393e-235 | 100 100             |
| ELK4-regulon          | DZ 1              | 0.0300254343668978    | -0.0154749721059005 |
| 21414015              | 0.330481554530807 | 4.21531194118024e-109 |                     |
| 6.65082550719548e-109 | 92.8184281842818  | 96.8610478359909      |                     |
| ESRRA-regulon         | DZ 1              |                       |                     |
| 0.0851728520299066    |                   | -0.00678352951309054  | 29219724.5          |
| 0.450946726978659     |                   | 1.35205589331463e-10  |                     |
| 1.46558730420364e-10  |                   | 100 100               |                     |
| ETS1-regulon          | DZ 1              | 0.286344332707468     | 0.0448646950521562  |
| 55646545              | 0.858790688988894 | 0                     | 0 100 100           |
| ETV2-regulon          | DZ 1              |                       |                     |
| 0.0201595307417107    |                   | -0.00872634747704877  | 15463272.5          |
| 0.238644006457149     |                   | 1.59393248667408e-256 |                     |
| 3.53653770480811e-256 |                   | 100 100               |                     |
| ETV3-regulon          | DZ 1              |                       |                     |
| 0.00360290778513733   |                   | -0.00808927747331163  | 14969018            |
| 0.231016198430777     |                   | 1.26055723174294e-272 |                     |
| 2.88708269205642e-272 |                   | 53.1842818428184      | 85.3963553530752    |

|                       |                       |                       |                     |
|-----------------------|-----------------------|-----------------------|---------------------|
| ETV5-regulon          | DZ 1                  | 0.0399961979135958    | 0.00675219245695948 |
| 45953942              | 0.709205171892266     | 4.08272229086706e-165 |                     |
| 7.43264827311696e-165 | 100                   | 100                   |                     |
| ETV6-regulon          | DZ 1                  | 0.428016185680409     | -0.0326197721664119 |
| 9100553.5             | 0.140448443123383     | 0                     | 0 100               |
| 100                   |                       |                       |                     |
| ETV7-regulon          | DZ 1                  |                       |                     |
| 0.0628720042774972    | -0.00124455846373682  | 32538083.5            |                     |
| 0.502158815921872     | 0.777488430423106     | 0.777488430423106     |                     |
| 100                   | 100                   |                       |                     |
| FLI1-regulon          | DZ 1                  | 0.135540365927297     | -0.0086732757796624 |
| 23314783.5            | 0.359816031446191     |                       |                     |
| 3.27445425775445e-75  | 4.7446173938891e-75   | 100                   | 100                 |
| FOS-regulon           | DZ 1                  | 0.0697588967027501    | -0.0170740150511383 |
| 13819633              | 0.213277790124143     | 0                     | 0 100 100           |
| FOSB-regulon          | DZ 1                  | 0.0142091501326966    | -0.0281810095424914 |
| 7860341.5             | 0.121308305708342     | 0                     | 0                   |
| 93.0216802168022      | 99.5353075170843      |                       |                     |
| FOSL1-regulon         | DZ 1                  | 0.0468025778976903    | -0.014461536619665  |
| 19286069.5            | 0.297641064935706     |                       |                     |
| 1.28729569942001e-154 | 2.31387328250179e-154 | 100                   | 100                 |
| FOX01-regulon         | DZ 1                  | 0.00778543792366176   | -0.0092111700308087 |
| 25174193.5            | 0.388512224444568     |                       |                     |
| 7.04876606327528e-54  | 9.01734036923504e-54  | 36.3143631436314      |                     |
| 52.8815489749431      |                       |                       |                     |
| FOX03-regulon         | DZ 1                  | 0.00844205284498133   | -0.0116818494775687 |
| 25510504.5            | 0.393702497360965     |                       |                     |
| 1.60555978870538e-51  | 2.03562044639433e-51  | 30.6233062330623      |                     |
| 47.3029612756264      |                       |                       |                     |
| GABPA-regulon         | DZ 1                  |                       |                     |
| 0.0207150368566727    | -0.00493336363177631  | 21678593.5            |                     |
| 0.334564782920039     | 5.34827132673494e-104 |                       |                     |
| 8.07930349357832e-104 | 100                   | 100                   |                     |
| GTF2B-regulon         | DZ 1                  | 0.0814340480522025    | 0.00245698892022382 |
| 35504613              | 0.547941135618645     | 3.48250524224827e-10  |                     |
| 3.74633139696405e-10  | 100                   | 100                   |                     |
| HINFP-regulon         | DZ 1                  |                       |                     |
| 0.00926733855640657   | -0.00719732358737763  | 25872606.5            |                     |
| 0.399290801649474     | 1.13756193813953e-41  |                       |                     |
| 1.36893046793062e-41  | 52.3712737127371      | 63.5990888382688      |                     |
| HIVEP3-regulon        | DZ 1                  |                       |                     |
| 0.0714230805095051    | -0.00647552413464939  | 28114946.5            |                     |
| 0.433896736547092     | 5.01249461065181e-18  |                       |                     |
| 5.60452153316974e-18  | 99.8644986449865      | 99.6879271070615      |                     |
| HOBX2-regulon         | DZ 1                  | 0.00706025644738404   | -0.0310525519695848 |
| 11234926              | 0.173388120327673     | 0                     | 0                   |
| 43.4959349593496      | 85.0820045558087      |                       |                     |
| IKZF1-regulon         | DZ 1                  | 0.147195119084679     | 0.00344297999310009 |
| 37570707.5            | 0.579827081442796     |                       |                     |
| 1.47192420650027e-25  | 1.6721058985843e-25   | 100                   | 100                 |

|                       |      |                       |                       |
|-----------------------|------|-----------------------|-----------------------|
| IRF1-regulon          | DZ 1 | 0.097578517413465     | -0.0391369823295193   |
| 4070792.5             |      | 0.0628243621559222    | 0 0 100               |
| 100                   |      |                       |                       |
| IRF2-regulon          | DZ 1 | 0.0593997201409923    | -0.0264821171248728   |
| 7323907.5             |      | 0.113029543307962     | 0 0 100               |
| 100                   |      |                       |                       |
| IRF3-regulon          | DZ 1 |                       |                       |
| 0.136825773800253     |      | -0.00891060090129692  | 19830216.5            |
| 0.306038861726886     |      | 3.25136468602691e-142 |                       |
| 5.49635458828359e-142 |      | 100 100               |                       |
| IRF4-regulon          | DZ 1 | 0.0427511082668811    | -0.0161878019985386   |
| 14550253              |      | 0.224553416547833     | 1.08426454537113e-284 |
| 2.56609275737833e-284 |      | 100 99.995444191344   |                       |
| IRF5-regulon          | DZ 1 | 0.00654146972694152   | -0.0418650827792193   |
| 10075190              |      | 0.15548996549191 0 0  | 28.3875338753388      |
| 82.2300683371298      |      |                       |                       |
| IRF7-regulon          | DZ 1 | 0.087429486542663     | -0.0210912699035286   |
| 11406416              |      | 0.176034717978159 0   | 0 100 100             |
| IRF8-regulon          | DZ 1 | 0.0998468776693617    | 0.018681633107817     |
| 50945235.5            |      | 0.786235585618954     |                       |
| 2.94952965901243e-307 |      | 7.22126226861665e-307 | 100 100               |
| IRF9-regulon          | DZ 1 | 0.0203639179248936    | -0.0140079569556346   |
| 9922481.5             |      | 0.15313322190739 0    | 0 100 100             |
| JUN-regulon           | DZ 1 | 0.0578384096046849    | -0.0315894210132311   |
| 3204485.5             |      | 0.0494546842108512    | 0 0 100               |
| 100                   |      |                       |                       |
| JUNB-regulon          | DZ 1 | 0.125737517242686     | -0.0351896291209551   |
| 5485115.5             |      | 0.0846515469995247    | 0 0 100               |
| 100                   |      |                       |                       |
| JUND-regulon          | DZ 1 | 0.0252491069942707    | -0.0136526779117344   |
| 11216451              |      | 0.173102996462766 0   | 0 100 100             |
| KLF11-regulon         | DZ 1 | 0.00216901520397043   | -0.0204320920142754   |
| 20928698.5            |      | 0.322991686266521     |                       |
| 3.13380893383943e-149 |      | 5.56251085756499e-149 | 8.26558265582656      |
| 41.9544419134396      |      |                       |                       |
| KLF12-regulon         | DZ 1 | 0.0590944854731514    | 0.0124498313403698    |
| 43322064              |      | 0.668587514121155     | 6.3364586371326e-108  |
| 9.78018615731336e-108 |      | 99.9322493224932      | 98.5580865603645      |
| KLF13-regulon         | DZ 1 | 0.0483310595494028    | -0.018564922892476    |
| 6925643               |      | 0.106883144742609 0   | 0 100 100             |
| KLF2-regulon          | DZ 1 | 0.0816344902944426    | -0.0281288581579053   |
| 10516771              |      | 0.162304865702416 0   | 0 100 100             |
| KLF3-regulon          | DZ 1 | 0.0371176574772931    | -0.0360853516302758   |
| 11232863.5            |      | 0.173356289855609     | 0 0                   |
| 99.8644986449865      |      | 99.8633257403189      |                       |
| KLF4-regulon          | DZ 1 |                       |                       |
| 0.00878578094637766   |      | -0.00735319700036295  | 27063269              |
| 0.417666243803668     |      | 9.19161562450032e-31  |                       |
| 1.06114586884475e-30  |      | 38.4823848238482      | 50.1936218678815      |
| KLF6-regulon          | DZ 1 | 0.0303710489921622    | -0.0403203776515166   |

|                       |                   |                       |                     |     |     |
|-----------------------|-------------------|-----------------------|---------------------|-----|-----|
| 4404504.5             |                   | 0.0679745248192801    | 0                   | 0   | 100 |
| 100                   |                   |                       |                     |     |     |
| KLF7-regulon          | DZ 1              | 0.0139195496472474    | -0.0331577505276903 |     |     |
| 7655833.5             |                   | 0.118152142711632     | 0                   | 0   |     |
| 84.9593495934959      | 97.9794988610478  |                       |                     |     |     |
| KLF8-regulon          | DZ 1              | 0.00374288714397114   | -0.0220821286400424 |     |     |
| 12127431              | 0.187162110858011 | 0                     | 0                   |     |     |
| 32.7913279132791      | 79.1435079726651  |                       |                     |     |     |
| MAFB-regulon          | DZ 1              |                       |                     |     |     |
| 0.0472351729015308    |                   | -0.00883512320855654  | 19743538.5          |     |     |
| 0.304701163953553     |                   | 3.72796967476301e-144 |                     |     |     |
| 6.37797221465479e-144 |                   | 100                   | 99.997722095672     |     |     |
| MAFF-regulon          | DZ 1              | 0.00249756586680362   | -0.0102218741772898 |     |     |
| 25648745.5            |                   | 0.395835964652357     |                     |     |     |
| 1.27716881238861e-65  |                   | 1.72721877484935e-65  | 9.28184281842818    |     |     |
| 29.1936218678815      |                   |                       |                     |     |     |
| MAFG-regulon          | DZ 1              | 0.00767810007907073   | -0.0183253431748428 |     |     |
| 20760720              | 0.320399281441562 | 2.10984631854933e-131 |                     |     |     |
| 3.44365720958626e-131 |                   | 32.5880758807588      | 59.4760820045558    |     |     |
| MAX-regulon           | DZ 1              | 0.177946849903244     | -0.0203864962730413 |     |     |
| 6666588.5             |                   | 0.102885168003161     | 0                   | 0   | 100 |
| 100                   |                   |                       |                     |     |     |
| MAZ-regulon           | DZ 1              | 0.189699477107949     | 0.0551909259520239  |     |     |
| 63905131.5            |                   | 0.986245092319944     | 0                   | 0   | 100 |
| 100                   |                   |                       |                     |     |     |
| MEF2A-regulon         | DZ 1              |                       |                     |     |     |
| 0.0342039559643471    |                   | -0.00677059461243739  | 23462286            |     |     |
| 0.362092431060985     |                   | 7.54614865363462e-73  |                     |     |     |
| 1.06094367209516e-72  |                   | 100                   | 99.997722095672     |     |     |
| MLX-regulon           | DZ 1              |                       |                     |     |     |
| 0.0446884996162847    |                   | -0.00851390008334302  | 23761450.5          |     |     |
| 0.366709423671685     |                   | 3.56005383134482e-68  |                     |     |     |
| 4.86084273125927e-68  |                   | 100                   | 99.9886104783599    |     |     |
| MXD4-regulon          | DZ 1              |                       |                     |     |     |
| 0.0859676143345284    |                   | -0.00641002172984624  | 35040061            |     |     |
| 0.540771724972375     |                   | 9.23959985924199e-08  |                     |     |     |
| 9.71869022231379e-08  |                   | 94.1734417344173      | 88.4168564920273    |     |     |
| MXI1-regulon          | DZ 1              | 0.0398259970991896    | -0.0262576694270269 |     |     |
| 10091167              | 0.155736537832349 | 0                     | 0                   | 100 | 100 |
| MYBL1-regulon         | DZ 1              | 0.0930687926388676    | 0.0653027553737562  |     |     |
| 56983022.5            |                   | 0.879416487644375     | 0                   | 0   |     |
| 99.3224932249322      | 79.4123006833713  |                       |                     |     |     |
| MYC-regulon           | DZ 1              | 0.301415674536074     | -0.0139188394742591 |     |     |
| 31173357              | 0.481097051688057 | 0.0133443926451628    |                     |     |     |
| 0.0136324011195188    |                   | 100                   | 100                 |     |     |
| NFATC1-regulon        | DZ 1              |                       |                     |     |     |
| 0.0459574319134062    |                   | -0.00471373974875824  | 27181920            |     |     |
| 0.419497379484045     |                   | 5.72676634762659e-26  |                     |     |     |
| 6.55807114002399e-26  |                   | 91.7344173441735      | 94.9316628701595    |     |     |
| NFE2L1-regulon        | DZ 1              | 0.146756166020572     | -0.0371183706271997 |     |     |

24592095 0.37952872381799 5.00505909527426e-56  
 6.52035221586188e-56 100 99.9339407744875  
 NFE2L2-regulon DZ 1 0.0953381453272577 -0.0160649472232144  
 18473746.5 0.285104519695539  
 4.16641408282852e-174 7.88841066348867e-174 100 100  
 NFKB1-regulon DZ 1 0.0304133223472561 -0.0271382323910593  
 12572714.5 0.194034151588669 0 0  
 99.9322493224932 99.9316628701595  
 NFKB2-regulon DZ 1 0.0454750656158627 -0.0288396287899933  
 8068080.5 0.124514332586378 0 0 100  
 100  
 NFYA-regulon DZ 1 0.00872372616496585 -0.0126356964973801  
 10793522.5 0.166575959466884 0 0  
 95.1219512195122 99.1480637813212  
 NFYB-regulon DZ 1 0.186337110323165 0.0803250433892105  
 63890066 0.986012587119037 0 0 100 100  
 NFYC-regulon DZ 1 0.115295687980621 0.0328288116651352  
 60986065.5 0.941195274737485 0 0 100  
 100  
 NR1H3-regulon DZ 1  
 0.00209190247570834 -0.00665909418773354 27707376.5  
 0.427606726608268 6.38615365023043e-39  
 7.49449436638612e-39 8.73983739837398 22.5535307517084  
 NR2C2-regulon DZ 1 0.0082259656857937 -0.0140161221375748  
 18767793 0.289642526436654 3.10619437824578e-169  
 5.72830651572598e-169 51.3550135501355 76.8063781321185  
 NR3C1-regulon DZ 1 0.227473955919822 0.0020634922756709  
 33637596 0.519127544122822 0.0122852302165461  
 0.0126413238460112 100 100  
 NRF1-regulon DZ 1 0.0314366593987196 0.00486576816126033  
 39180003 0.604663268329722 1.0056344023074e-42  
 1.23103521661768e-42 100 99.9658314350797  
 PAX5-regulon DZ 1 0.101309676354502 0.0010770312010509  
 32798572 0.506178923520442 0.418609507870239  
 0.424589643696957 100 100  
 POU2F1-regulon DZ 1  
 0.000823278029160382 -0.00419309677027755 27828831.5  
 0.429481136297696 1.40988321292355e-42  
 1.71114030970209e-42 4.94579945799458 18.7972665148064  
 POU6F1-regulon DZ 1 0.0169472440908694 -0.0145274372867338  
 24720509 0.381510531449278 1.55845393306055e-56  
 2.04907831939443e-56 50.7452574525745 65.8451025056948  
 REL-regulon DZ 1 0.254017509505922 -0.0100204187882824  
 23660107.5 0.365145401596385  
 9.68126119124302e-70 1.33469814481215e-69 100 100  
 RELA-regulon DZ 1 0.0769127011794402 -0.0156611909746363  
 8086267 0.124795004043435 0 0 100 100  
 RELB-regulon DZ 1 0.119056564500284 0.0143393180163436  
 49935751 0.770656255594447 5.98073487943765e-275  
 1.39223664406581e-274 100 100

|                                   |      |                                   |     |                     |
|-----------------------------------|------|-----------------------------------|-----|---------------------|
| REST-regulon                      | DZ 1 |                                   |     |                     |
| 0.209783084900046                 |      | -0.00913244940223693              |     | 17976830            |
| 0.277435629139891                 |      | 1.32282361644259e-186             |     |                     |
| 2.64564723288517e-186             |      | 100                               | 100 |                     |
| RFX5-regulon                      | DZ 1 |                                   |     |                     |
| 57088623.5                        |      | 0.0978833570793956                |     | 0.0336287661154823  |
|                                   |      | 0.88104622324697 0                |     | 0 100 100           |
| RXRA-regulon                      | DZ 1 |                                   |     |                     |
| 0.00520511055741407               |      | -0.00963855307668243              |     | 19824951            |
| 0.305957599496268                 |      | 4.83351372190387e-149             |     |                     |
| 8.47356726555987e-149             |      | 31.7073170731707 65.3576309794989 |     |                     |
| SETDB1-regulon                    | DZ 1 |                                   |     |                     |
| 24601566.5                        |      | 0.0514862493347628                |     | -0.008508028510265  |
|                                   |      | 0.379674897062182                 |     |                     |
| 6.67116963495933e-56              |      | 8.61187352876568e-56              |     | 98.0352303523035    |
| 94.9521640091116                  |      |                                   |     |                     |
| SOX5-regulon                      | DZ 1 |                                   |     |                     |
| 0.00193756093111926               |      | -0.00606295981286215              |     | 27551873.5          |
| 0.425206855627782                 |      | 6.66128526199946e-41              |     |                     |
| 7.88252089336603e-41              |      | 8.60433604336043 22.9612756264237 |     |                     |
| SP1-regulon                       | DZ 1 |                                   |     |                     |
| 18932783 0.292188809872153        |      | 0.00311196986938232               |     | -0.0102141519259514 |
|                                   |      | 4.14712165674022e-174             |     |                     |
| 7.88841066348867e-174             |      | 25.7452574525745 60.9681093394077 |     |                     |
| SP2-regulon                       | DZ 1 |                                   |     |                     |
| 39183608.5                        |      | 0.0310972721847919                |     | 0.00295317668001769 |
|                                   |      | 0.604718911853128                 |     |                     |
| 9.09623127871176e-43              |      | 1.12318681876267e-42              |     | 100 100             |
| SP3-regulon                       | DZ 1 |                                   |     |                     |
| 0.0217587471630331                |      | -0.00673007027670056              |     | 16633123.5          |
| 0.256698265644388                 |      | 1.36669408995615e-222             |     |                     |
| 2.89657553393692e-222             |      | 100                               | 100 |                     |
| SP4-regulon                       | DZ 1 |                                   |     |                     |
| 0.00203076952032542               |      | -0.00682929967954941              |     | 26035141            |
| 0.401799189461143                 |      | 6.78435160929408e-58              |     |                     |
| 9.00353204224075e-58              |      | 11.1111111111111 29.6173120728929 |     |                     |
| SPI1-regulon                      | DZ 1 |                                   |     |                     |
| 48153603.5                        |      | 0.443385256390348                 |     | 0.0256775225111792  |
|                                   |      | 0.743152451370755                 |     |                     |
| 2.54773413088777e-222             |      | 5.32026833214798e-222             |     | 100 100             |
| SPIB-regulon                      | DZ 1 |                                   |     |                     |
| 55174603.5                        |      | 0.603267150967071                 |     | 0.0401209949949686  |
|                                   |      | 0.85150723651314 0                |     | 0 100 100           |
| SREBF1-regulon                    | DZ 1 |                                   |     |                     |
| 0.0359973251006631                |      | -0.00509839670712534              |     | 27677140            |
| 0.427140088029582                 |      | 1.46043829755566e-21              |     |                     |
| 1.64589077978495e-21              |      | 98.3062330623306 96.8473804100228 |     |                     |
| SREBF2-regulon                    | DZ 1 |                                   |     |                     |
| 0.0952753419660433                |      | -0.00383193812277023              |     | 25470161.5          |
| 0.393079885610929                 |      | 1.64623123953417e-44              |     |                     |
| 2.06871536295444e-44              |      | 100                               | 100 |                     |
| SRF-regulon                       | DZ 1 |                                   |     |                     |
| 10395469.5                        |      | 0.00766382296823556               |     | -0.0135459796445996 |
|                                   |      | 0.160432824971758                 |     | 0 0                 |
| 88.2791327913279 98.2596810933941 |      |                                   |     |                     |
| STAT1-regulon                     | DZ 1 |                                   |     |                     |
| 4283380.5                         |      | 0.0579517472723943                |     | -0.0225502832963389 |
|                                   |      | 0.0661052234383392                |     | 0 0 100             |

|                       |                   |                       |                       |                     |
|-----------------------|-------------------|-----------------------|-----------------------|---------------------|
| 100                   |                   |                       |                       |                     |
| STAT2-regulon         | DZ 1              | 0.0500711949373756    |                       | -0.0167065953272247 |
| 18030493.5            |                   | 0.278263815582347     |                       |                     |
| 3.10641473966191e-185 |                   | 6.12654018099988e-185 |                       | 99.7967479674797    |
| 99.9681093394077      |                   |                       |                       |                     |
| STAT5A-regulon        | DZ 1              | 0.0624143975128842    |                       | -0.0095025311567979 |
| 22964198              | 0.354405460797205 |                       | 5.56417188102675e-81  |                     |
| 8.14548873304947e-81  | 100               | 100                   |                       |                     |
| TBP-regulon           | DZ 1              |                       |                       |                     |
| 0.0154953891459289    |                   | -0.00558763175659797  |                       | 29515695            |
| 0.455514426727411     |                   | 4.71192963625771e-10  |                       |                     |
| 5.03078201765861e-10  |                   | 43.8346883468835      | 50.0888382687927      |                     |
| TCF12-regulon         | DZ 1              |                       |                       |                     |
| 0.00236675514713284   |                   | -0.00690144997364097  |                       | 27129414            |
| 0.418687056688335     |                   | 2.96116561721591e-44  |                       |                     |
| 3.68846945302332e-44  |                   | 10.2981029810298      | 25.7220956719818      |                     |
| TFDP1-regulon         | DZ 1              | 0.639143828973834     |                       | 0.114711899285989   |
| 63669157.5            |                   | 0.982603315924959     | 0                     | 0 100               |
| 100                   |                   |                       |                       |                     |
| TFDP2-regulon         | DZ 1              | 0.0376399978736046    |                       | 0.0108704400984067  |
| 48452332.5            |                   | 0.747762722929052     |                       |                     |
| 9.47571440414423e-231 |                   | 2.03871431119467e-230 |                       | 100                 |
| 99.995444191344       |                   |                       |                       |                     |
| TFEC-regulon          | DZ 1              | 0.0696450863293575    |                       | -0.022632658913699  |
| 13259217              | 0.204628914569328 | 0                     | 0                     | 100 100             |
| THAP1-regulon         | DZ 1              |                       |                       |                     |
| 0.0316736816933035    |                   | -0.00567606352348928  |                       | 19588563.5          |
| 0.302309441573915     |                   | 1.1719477703558e-147  |                       |                     |
| 2.02947052915272e-147 |                   | 100                   | 100                   |                     |
| THAP11-regulon        | DZ 1              |                       |                       |                     |
| 0.177302526843309     |                   | -0.00121469494900839  |                       | 30264682            |
| 0.467073510256743     |                   | 1.63135592831693e-05  |                       |                     |
| 1.70332751338973e-05  |                   | 100                   | 100                   |                     |
| TP53-regulon          | DZ 1              | 0.101049133179728     |                       | 0.00278296590382934 |
| 36341618              | 0.560858597082554 |                       | 1.6317091499172e-15   |                     |
| 1.81017733818939e-15  | 100               | 100                   |                       |                     |
| USF2-regulon          | DZ 1              |                       |                       |                     |
| 0.117436416018758     |                   | -0.00811371366248316  |                       | 20045788            |
| 0.309365767233982     |                   | 1.90775516241839e-137 |                       |                     |
| 3.15001433794665e-137 |                   | 100                   | 100                   |                     |
| XBP1-regulon          | DZ 1              | 0.168087695979404     |                       | -0.0281167584446077 |
| 7899840               | 0.121917884326907 | 0                     | 0                     | 100 100             |
| YBX1-regulon          | DZ 1              | 0.115145574227304     |                       | 0.0206329656514457  |
| 60029642.5            |                   | 0.926434840515831     | 0                     | 0 100               |
| 100                   |                   |                       |                       |                     |
| YY1-regulon           | DZ 1              | 0.709059985801249     |                       | 0.0719283541074913  |
| 60270629.5            |                   | 0.930153982320005     | 0                     | 0 100               |
| 100                   |                   |                       |                       |                     |
| YY2-regulon           | DZ 1              | 0.0302610904061583    |                       | -0.0214383165950516 |
| 20494851              | 0.316296136822416 |                       | 6.96311342429026e-128 |                     |

|                       |                      |                       |         |
|-----------------------|----------------------|-----------------------|---------|
| 1.12359330255593e-127 | 85.9756097560976     | 90.6833712984055      |         |
| ZBTB33-regulon DZ 1   | 0.355401757999115    | -0.0107747387075849   |         |
| 21557759              | 0.332699949379904    | 2.59738644074275e-106 |         |
| 3.96590187726312e-106 | 100                  | 100                   |         |
| ZNF143-regulon DZ 1   | 0.0133893757944393   | -0.0102756071361469   |         |
| 10146494              | 0.156590396997364    | 0                     |         |
| 99.9322493224932      | 99.995444191344      |                       |         |
| ZNF274-regulon DZ 1   | 0.0462897470254072   | -0.0196923403100151   |         |
| 7024998               | 0.10841648610108     | 0                     | 100 100 |
| ZNF76-regulon DZ 1    |                      |                       |         |
| 0.0122475498590906    | -0.00238720840448039 | 26456448              |         |
| 0.408301201918625     | 3.40134291056914e-33 |                       |         |
| 3.95894010902309e-33  | 99.390243902439      | 99.4624145785877      |         |
| ATF1-regulon DZ 2     |                      |                       |         |
| 0.0981965434243653    | -0.00816879730924991 | 11462715.5            |         |
| 0.332886670983294     | 2.98853941065816e-57 |                       |         |
| 4.76823141925234e-57  | 100                  | 100                   |         |
| ATF3-regulon DZ 2     | 0.0348125749906271   | -0.0164897528067283   |         |
| 6296581               | 0.182857882817266    | 3.44405379599685e-201 |         |
| 9.78111278063105e-201 | 100                  | 100                   |         |
| ATF4-regulon DZ 2     | 0.0843339003169048   | -0.0248403611915022   |         |
| 4906248               | 0.142481470794459    | 4.17309713477447e-255 |         |
| 1.60156700848101e-254 | 100                  | 100                   |         |
| ATF5-regulon DZ 2     | 0.10513679693765     | -0.0135267811284812   |         |
| 12778772.5            | 0.371106046972715    | 9.0711069068004e-35   |         |
| 1.25057978715112e-34  | 100                  | 99.9977580486055      |         |
| ATF6-regulon DZ 2     | 0.112719569276413    | -0.0241044753033959   |         |
| 3400934.5             | 0.0987659306328622   | 0                     | 0 100   |
| 100                   |                      |                       |         |
| ATF6B-regulon DZ 2    |                      |                       |         |
| 0.0509705518422259    | -0.00643544842562033 | 7338480.28515625      |         |
| 0.213115493636931     | 4.9612221754179e-165 |                       |         |
| 1.13627991759571e-164 | 99.6113989637306     | 99.9260156039817      |         |
| BACH1-regulon DZ 2    | 0.0153476150057449   | -0.0284187199170236   |         |
| 3864324               | 0.112223142235437    | 9.82747074516303e-300 |         |
| 5.5820033832526e-299  | 95.8549222797927     | 99.627836068514       |         |
| BATF-regulon DZ 2     | 0.00676438314838548  | -0.012745819876675    |         |
| 12224892              | 0.355020902421447    | 7.92183374549646e-49  |         |
| 1.17177124152135e-48  | 26.6839378238342     | 52.1500313873195      |         |
| BATF3-regulon DZ 2    |                      |                       |         |
| 0.0751442997818233    | -0.00815811237642501 | 16234426              |         |
| 0.471461062299299     | 0.00646205930860601  | 0.00674715016045627   |         |
| 100                   | 100                  |                       |         |
| BCL11A-regulon DZ 2   |                      |                       |         |
| 0.197498057838109     | -0.00712346827954977 | 12818516              |         |
| 0.372260230848972     | 3.52553752902501e-34 |                       |         |
| 4.81371470309185e-34  | 100                  | 100                   |         |
| BHLHE40-regulon DZ 2  | 0.0298950624691208   | -0.0262018972266556   |         |
| 3255091.5             | 0.0945305301506452   | 0                     | 0 100   |
| 100                   |                      |                       |         |



|                       |                    |                       |                      |
|-----------------------|--------------------|-----------------------|----------------------|
| BRF2-regulon          | DZ 2               | 0.0290911407616952    | -0.0127379096910081  |
| 9598361.5             |                    | 0.27874429986762      | 5.96226434209706e-99 |
| 1.09953446308803e-98  |                    | 99.6113989637306      | 99.7309658326607     |
| CEBPB-regulon         | DZ 2               | 0.112283803517421     | -0.0313414421045129  |
| 2551244               | 0.0740902207706458 | 0                     | 0 100 100            |
| CEBPG-regulon         | DZ 2               |                       |                      |
| 0.0608544205568581    |                    | -0.00733103907850567  | 15253683             |
| 0.442979480220413     |                    | 5.29054916622275e-08  |                      |
| 5.73479375269947e-08  |                    | 100 100               |                      |
| CLOCK-regulon         | DZ 2               | 0.00571359931904858   | -0.010052149089372   |
| 12715057.5            |                    | 0.369255711051728     |                      |
| 3.14019325006572e-40  |                    | 4.45907441509332e-40  | 31.3471502590674     |
| 51.434848892476       |                    |                       |                      |
| CREB1-regulon         | DZ 2               | 0.0539420719695411    | 0.0111607580169106   |
| 24267476.5            |                    | 0.704747445337043     |                      |
| 5.18821473539855e-85  |                    | 9.09538879539005e-85  | 100                  |
| 99.9932741458165      |                    |                       |                      |
| CREB3-regulon         | DZ 2               | 0.21615198000279      | -0.0240573304831512  |
| 6045325.5             | 0.175561216773235  | 1.86332835222185e-210 |                      |
| 6.01346877307961e-210 | 100 100            |                       |                      |
| CREB3L2-regulon       | DZ 2               | 0.104674767405743     | -0.0224849814094668  |
| 3505578.5             |                    | 0.101804878323606     | 0 0 100              |
| 100                   |                    |                       |                      |
| CREB3L4-regulon       | DZ 2               |                       |                      |
| 0.00315788626782094   |                    | -0.00808094264918463  | 13867239             |
| 0.402716007951144     |                    | 1.51142354633591e-29  | 2.0058144259785e-29  |
| 13.4715025906736      |                    | 31.656353690252       |                      |
| CREB5-regulon         | DZ 2               | 0.0211843703984597    | -0.0183013098238767  |
| 8078288.5             |                    | 0.234600131705932     |                      |
| 1.64648744983574e-141 |                    | 3.38842344748805e-141 | 98.4455958549223     |
| 99.6435297282755      |                    |                       |                      |
| CREM-regulon          | DZ 2               | 0.151123012929533     | 0.00114289950117516  |
| 18032772.5            |                    | 0.523686521411449     | 0.0238015979769111   |
| 0.0246702694359225    |                    | 100 100               |                      |
| CTCF-regulon          | DZ 2               | 0.458040636883276     | 0.0887096376640182   |
| 33464803.5            |                    | 0.971845374006281     | 0 0 100              |
| 100                   |                    |                       |                      |
| CUX1-regulon          | DZ 2               | 0.117410493343205     | 0.0414170730244439   |
| 32664064              | 0.948591241381265  | 0                     | 0 100 100            |
| DDIT3-regulon         | DZ 2               | 0.062194197701264     | -0.0231070591360586  |
| 6405413.5             |                    | 0.18601846798749      | 3.0600929765338e-197 |
| 8.35640774361154e-197 |                    | 100 100               |                      |
| E2F1-regulon          | DZ 2               | 0.525404532219088     | 0.0892276695219814   |
| 31257310.5            |                    | 0.9077379645544       | 0 100 100            |
| E2F2-regulon          | DZ 2               | 0.0755368336835231    | 0.0219899658875422   |
| 31975434.5            |                    | 0.928592875217864     | 0 0 100              |
| 100                   |                    |                       |                      |
| E2F3-regulon          | DZ 2               |                       |                      |
| 0.0121348647696793    |                    | -0.00913586978475541  | 5960650              |
| 0.173102170720068     |                    | 1.25862218285177e-213 |                      |

|                       |                      |                       |                       |                     |     |
|-----------------------|----------------------|-----------------------|-----------------------|---------------------|-----|
| 4.25534166583219e-213 | 100                  | 100                   |                       |                     |     |
| E2F4-regulon          | DZ 2                 |                       |                       |                     |     |
| 0.397581041849418     |                      | -0.00109511144874069  |                       | 18900428            |     |
| 0.548883949626024     |                      | 3.08894473944214e-06  |                       |                     |     |
| 3.29797107519387e-06  | 100                  | 100                   |                       |                     |     |
| E2F6-regulon          | DZ 2                 | 0.0578498023321957    |                       | -0.0148032709854322 |     |
| 11678925.5            |                      | 0.339165586928936     |                       | 3.6618390234664e-53 |     |
| 5.59119506808848e-53  |                      | 100                   | 100                   |                     |     |
| E2F7-regulon          | DZ 2                 |                       |                       |                     |     |
| 0.0283752145262518    |                      | -0.00223686947115581  |                       | 14904507            |     |
| 0.432839122446789     |                      | 1.46558147132975e-10  |                       |                     |     |
| 1.65168705499067e-10  | 100                  | 100                   |                       |                     |     |
| E2F8-regulon          | DZ 2                 | 0.115747818146269     |                       | 0.041659985297243   |     |
| 32863975              | 0.954396820982621    | 0                     | 0                     | 100                 | 100 |
| EGR1-regulon          | DZ 2                 |                       |                       |                     |     |
| 0.0455664847201391    |                      | -0.00192934819115074  |                       | 14993159            |     |
| 0.435413649325347     |                      | 7.12722561902176e-10  |                       |                     |     |
| 7.84547316202395e-10  | 100                  | 100                   |                       |                     |     |
| EGR2-regulon          | DZ 2                 |                       |                       |                     |     |
| 0.0369271819056188    |                      | -0.00927858712348516  |                       | 11813431            |     |
| 0.343071737101113     |                      | 1.06824065194323e-50  |                       |                     |     |
| 1.59673865869408e-50  | 100                  | 99.995516097211       |                       |                     |     |
| EGR3-regulon          | DZ 2                 | 0.0246683872614503    |                       | -0.0170935754397018 |     |
| 6521661.5             |                      | 0.189394405367115     |                       |                     |     |
| 4.5694290496737e-193  |                      | 1.17974350009757e-192 |                       | 100                 |     |
| 99.995516097211       |                      |                       |                       |                     |     |
| ELF1-regulon          | DZ 2                 | 0.80935244073909      | 0.104078530213222     |                     |     |
| 33164665.5            | 0.9631291200213      | 0                     | 0                     | 100                 | 100 |
| ELF2-regulon          | DZ 2                 | 0.0161812947889455    |                       | -0.0167599102783163 |     |
| 7281152.5             |                      | 0.21145064768001      | 6.65404931332613e-167 |                     |     |
| 1.54897541392182e-166 |                      | 98.7046632124352      | 99.5493677697067      |                     |     |
| ELF4-regulon          | DZ 2                 |                       |                       |                     |     |
| 0.0157136368941402    |                      | -0.00278077544180375  |                       | 14797366            |     |
| 0.429727659825578     |                      | 2.00241356304525e-11  |                       |                     |     |
| 2.27474180761941e-11  |                      | 98.4455958549223      | 98.3342301138911      |                     |     |
| ELK1-regulon          | DZ 2                 |                       |                       |                     |     |
| 0.0638685385707478    |                      | -0.00222427523913923  |                       | 15271868.5          |     |
| 0.44350760207384      | 7.01205106840966e-08 | 7.5432670584407e-08   |                       | 100                 |     |
| 100                   |                      |                       |                       |                     |     |
| ELK3-regulon          | DZ 2                 | 0.0560995806489089    |                       | -0.0089582863475721 |     |
| 11575188              | 0.336152964742584    | 4.18351746700393e-55  |                       |                     |     |
| 6.52812615730283e-55  | 100                  | 100                   |                       |                     |     |
| ELK4-regulon          | DZ 2                 | 0.0345470246506516    |                       | -0.0106308760365307 |     |
| 13207956              | 0.383569888246274    | 1.11291358965976e-28  |                       |                     |     |
| 1.46327527529339e-28  | 95.0777202072539     | 96.758138283562       |                       |                     |     |
| ESRRA-regulon         | DZ 2                 | 0.079403259543375     |                       | -0.0125459145882327 |     |
| 12249227              | 0.355727610804672    | 4.00445572422793e-43  |                       |                     |     |
| 5.80237462082007e-43  | 100                  | 100                   |                       |                     |     |
| ETS1-regulon          | DZ 2                 | 0.328032598471426     |                       | 0.0865663810441887  |     |
| 33252544              | 0.965681183824681    | 0                     | 0                     | 100                 | 100 |

|                       |                    |                       |                     |                       |
|-----------------------|--------------------|-----------------------|---------------------|-----------------------|
| ETV2-regulon          | DZ 2               |                       |                     |                       |
| 0.0227658039435869    |                    | -0.00593723436091178  |                     | 11193686              |
| 0.325073833383748     |                    | 1.48455607495402e-62  |                     |                       |
| 2.45124375166827e-62  |                    | 100                   | 100                 |                       |
| ETV3-regulon          | DZ 2               |                       |                     |                       |
| 0.00468892137198908   |                    | -0.00685679151110653  |                     | 9529327               |
| 0.276739481298408     |                    | 4.25709271120287e-101 |                     |                       |
| 8.06009553321077e-101 |                    | 62.0466321243523      | 84.7345529548919    |                       |
| ETV5-regulon          | DZ 2               | 0.0345321886918574    |                     | 0.00108704076797862   |
| 18474613              | 0.536517932358584  |                       |                     | 0.000492557541232163  |
| 0.000518097561888646  |                    | 100                   | 100                 |                       |
| ETV6-regulon          | DZ 2               | 0.423668060404163     |                     | -0.0365283053232991   |
| 4563810.5             |                    | 0.132536804594304     |                     |                       |
| 2.2502016102974e-269  |                    | 9.98526964569473e-269 | 100                 | 100                   |
| ETV7-regulon          | DZ 2               |                       |                     |                       |
| 0.0637683901852811    |                    | -0.000313014743216836 |                     | 17906463.5            |
| 0.52001840433001      | 0.0560969435941359 |                       | 0.0573076689954482  | 100                   |
| 100                   |                    |                       |                     |                       |
| FLI1-regulon          | DZ 2               |                       |                     |                       |
| 0.141357367407792     |                    | -0.00261870118258911  |                     | 14974540              |
| 0.434872938275942     |                    | 5.13782660906967e-10  |                     |                       |
| 5.69977639443667e-10  |                    | 100                   | 100                 |                       |
| FOS-regulon           | DZ 2               |                       |                     |                       |
| 0.0817168940434581    |                    | -0.00463956536214254  |                     | 14659789              |
| 0.425732310771171     |                    | 1.36958632139266e-12  |                     |                       |
| 1.59410866916195e-12  |                    | 100                   | 100                 |                       |
| FOSB-regulon          | DZ 2               | 0.01886068456029      | -0.0230041765924333 |                       |
| 6475160               | 0.188043963621376  |                       |                     | 9.89613592924033e-195 |
| 2.60231722583727e-194 |                    | 97.1502590673575      | 99.3610438525693    |                       |
| FOSL1-regulon         | DZ 2               | 0.0422364004634463    |                     | -0.0188784935176116   |
| 7954976               | 0.231019035445135  |                       |                     | 2.67124897614806e-145 |
| 5.7472326456519e-145  |                    | 100                   | 100                 |                       |
| FOX01-regulon         | DZ 2               |                       |                     |                       |
| 0.00757734483485858   |                    | -0.00927748175836326  |                     | 13355669              |
| 0.387859595064083     |                    | 9.11017979452646e-30  |                     |                       |
| 1.22042031209694e-29  |                    | 35.880829015544       | 52.6275670343467    |                       |
| FOX03-regulon         | DZ 2               | 0.0119865987089939    |                     | -0.0078915765164521   |
| 15267080.5            |                    | 0.443368554622067     |                     |                       |
| 4.49873486083213e-09  |                    | 4.91400269413971e-09  |                     | 40.2849740932642      |
| 46.8724778046812      |                    |                       |                     |                       |
| GABPA-regulon         | DZ 2               | 0.0339403681447792    |                     | 0.00859873484651914   |
| 26100305.5            |                    | 0.757974304565264     |                     |                       |
| 8.19700531284239e-134 |                    | 1.66282107774803e-133 | 100                 | 100                   |
| GTF2B-regulon         | DZ 2               | 0.0977126663042179    |                     | 0.0189785758093731    |
| 26637605              | 0.773577923260676  |                       |                     | 3.07283551390401e-150 |
| 6.71296373806721e-150 |                    | 100                   | 100                 |                       |
| HINFP-regulon         | DZ 2               |                       |                     |                       |
| 0.00877232752447907   |                    | -0.00758730441374362  |                     | 13203166.5            |
| 0.383430797233269     |                    | 3.68721972916575e-30  |                     |                       |
| 4.98652572896702e-30  |                    | 48.7046632124352      | 63.48533763788      |                       |

|                       |                   |                       |                     |
|-----------------------|-------------------|-----------------------|---------------------|
| HIVEP3-regulon        | DZ 2              | 0.0610783466615522    | -0.0168970978521168 |
| 11525733.5            |                   | 0.334716765451924     | 4.8202908921617e-56 |
| 7.60534785207735e-56  |                   | 99.7409326424871      | 99.6928526589544    |
| H0XB2-regulon         | DZ 2              | 0.00903432378350951   | -0.0285542048251444 |
| 6946774.5             |                   | 0.201740035978093     |                     |
| 6.0135857232593e-179  |                   | 1.47229167707383e-178 | 46.3730569948187    |
| 84.3758407317729      |                   |                       |                     |
| IKZF1-regulon         | DZ 2              | 0.146409362371901     | 0.00258928179306997 |
| 19491784              | 0.566057413471131 | 2.90780165155445e-10  |                     |
| 3.25124279150182e-10  | 100               | 100                   |                     |
| IRF1-regulon          | DZ 2              | 0.098187800410397     | -0.0378994417316186 |
| 2618046.5             |                   | 0.07603022202270016   | 0 0 100             |
| 100                   |                   |                       |                     |
| IRF2-regulon          | DZ 2              | 0.0599196013779982    | -0.0255352616530252 |
| 4376857.5             |                   | 0.127107535953698     |                     |
| 2.4979447986967e-277  |                   | 1.14421987553204e-276 | 100 100             |
| IRF3-regulon          | DZ 2              | 0.129026172596753     | -0.016704557523472  |
| 6182783               | 0.179553095449512 | 2.32296732983852e-205 |                     |
| 6.87211168410563e-205 | 100               | 100                   |                     |
| IRF4-regulon          | DZ 2              | 0.0401313362697548    | -0.018597419107646  |
| 6239575.5             |                   | 0.181202396285935     |                     |
| 2.8380671812935e-203  |                   | 8.22460285191177e-203 | 100                 |
| 99.995516097211       |                   |                       |                     |
| IRF5-regulon          | DZ 2              | 0.00645572696241281   | -0.0412915388236701 |
| 5586452               | 0.162235153519074 | 1.29072130146447e-229 |                     |
| 4.69954935405013e-229 | 30.9585492227979  | 81.3357546408394      |                     |
| IRF7-regulon          | DZ 2              | 0.0879896723753979    | -0.0201884978122753 |
| 6466553               | 0.187794009273547 | 4.86065173650261e-195 |                     |
| 1.30228782374221e-194 | 100               | 100                   |                     |
| IRF8-regulon          | DZ 2              | 0.107671458490842     | 0.0263467821896839  |
| 29577757              | 0.858962351711759 | 3.74255152588817e-257 |                     |
| 1.47622865743367e-256 | 100               | 100                   |                     |
| IRF9-regulon          | DZ 2              | 0.0207672826263845    | -0.013376518555679  |
| 5863293               | 0.170274843493207 | 2.661795304131e-217   |                     |
| 9.21890080942931e-217 | 100               | 100                   |                     |
| JUN-regulon           | DZ 2              | 0.066067449561108     | -0.0227193674427896 |
| 4566808.5             |                   | 0.132623868976179     |                     |
| 3.01186254347147e-269 |                   | 1.29601357931197e-268 | 100 100             |
| JUNB-regulon          | DZ 2              | 0.126811653861981     | -0.0335414916862353 |
| 3642999.5             |                   | 0.105795697009911     | 0 0 100             |
| 100                   |                   |                       |                     |
| JUND-regulon          | DZ 2              |                       |                     |
| 0.0294764532560818    |                   | -0.00913668048491617  | 9473707.5           |
| 0.275124245345221     |                   | 3.75743101028542e-102 |                     |
| 7.30897538987028e-102 | 100               | 100                   |                     |
| KLF11-regulon         | DZ 2              | 0.00352086127841632   | -0.0187343617602151 |
| 11705459.5            |                   | 0.339936156077919     |                     |
| 6.19101963441421e-66  |                   | 1.03426445657273e-65  | 11.139896373057     |
| 41.372971033988       |                   |                       |                     |
| KLF12-regulon         | DZ 2              | 0.0605757750438429    | 0.0137602589768167  |

|                       |                       |                     |                       |                      |
|-----------------------|-----------------------|---------------------|-----------------------|----------------------|
|                       | 23446169              | 0.680896001102157   |                       | 9.04867316512474e-67 |
| 1.52965665410442e-66  | 100                   | 98.5786028158909    |                       |                      |
| KLF13-regulon         | DZ 2                  | 0.0501958398896208  |                       | -0.0163748507367493  |
|                       | 4823802.5             | 0.140087185772507   |                       |                      |
| 1.66320745700926e-258 | 6.74787025415187e-258 | 100                 | 100                   |                      |
| KLF2-regulon          | DZ 2                  | 0.0854627979208336  |                       | -0.0237903234301167  |
|                       | 7186853               | 0.208712112763882   |                       | 4.7766598675849e-170 |
| 1.13047616866176e-169 | 100                   | 100                 |                       |                      |
| KLF3-regulon          | DZ 2                  | 0.0402920715181797  |                       | -0.0322864479654255  |
|                       | 7184232               | 0.20863599677159    | 3.9021642100159e-170  |                      |
| 9.39164945461453e-170 | 99.8704663212435      | 99.8632409649359    |                       |                      |
| KLF4-regulon          | DZ 2                  |                     |                       |                      |
| 0.00917319466558759   | -0.00684301998459923  | 14570506.5          |                       |                      |
| 0.423139473654864     | 4.25238519128714e-15  |                     |                       |                      |
| 5.07427476607373e-15  | 39.119170984456       | 49.9977580486055    |                       |                      |
| KLF6-regulon          | DZ 2                  | 0.0352313991392065  |                       | -0.0347395150800219  |
|                       | 4144999.5             | 0.120374189238355   |                       |                      |
| 2.3469152809075e-287  | 1.14917920651333e-286 | 100                 | 100                   |                      |
| KLF7-regulon          | DZ 2                  | 0.0172886430022728  |                       | -0.0292070053826556  |
|                       | 5522339               | 0.160373259351261   | 2.01192554621633e-230 |                      |
| 7.51824809375578e-230 | 87.4352331606218      | 97.7311451887723    |                       |                      |
| KLF8-regulon          | DZ 2                  | 0.0040157022022307  |                       | -0.0214560620395991  |
|                       | 6704785               | 0.194712462183043   | 1.13957773686811e-188 |                      |
| 2.83894804623283e-188 | 32.3834196891192      | 78.418975876603     |                       |                      |
| MAFB-regulon          | DZ 2                  |                     |                       |                      |
| 0.0501561824051495    | -0.00572410953321297  | 13310735.5          |                       |                      |
| 0.386554689325942     | 2.60160070621541e-27  |                     |                       |                      |
| 3.32817387641971e-27  | 99.8704663212435      | 100                 |                       |                      |
| MAFF-regulon          | DZ 2                  |                     |                       |                      |
| 0.00314343827533907   | -0.00940348780318624  | 14088627            |                       |                      |
| 0.409145297268815     | 1.4598937347557e-27   |                     |                       |                      |
| 1.88459009395735e-27  | 11.9170984455959      | 28.8337368845843    |                       |                      |
| MAFG-regulon          | DZ 2                  | 0.00678192440831677 |                       | -0.018947794650967   |
|                       | 10507778              | 0.305154501815168   | 6.47820184745717e-83  |                      |
| 1.12183495407185e-82  | 26.9430051813472      | 59.1494036409291    |                       |                      |
| MAX-regulon           | DZ 2                  | 0.178982723226633   |                       | -0.0190109272366695  |
|                       | 4237531.5             | 0.12306139450306    | 2.47562792425051e-283 |                      |
| 1.17179721747857e-282 | 100                   | 100                 |                       |                      |
| MAZ-regulon           | DZ 2                  | 0.159905878462459   |                       | 0.024010566701554    |
|                       | 30305707.5            | 0.880102632004472   |                       |                      |
| 4.50440817358027e-288 | 2.28437843088714e-287 | 100                 | 100                   |                      |
| MEF2A-regulon         | DZ 2                  |                     |                       |                      |
| 0.0389018681823161    | -0.00188450898312804  | 15897997            |                       |                      |
| 0.461690887873157     | 0.000256483950972076  |                     |                       |                      |
| 0.000271796425656976  | 100                   | 99.9977580486055    |                       |                      |
| MLX-regulon           | DZ 2                  | 0.0371484270836447  |                       | -0.0160500974105424  |
|                       | 8054761.5             | 0.233916888306214   |                       |                      |
| 3.14336366152761e-142 | 6.56408294024883e-142 | 99.8704663212435    |                       |                      |
| 99.991032194422       |                       |                     |                       |                      |
| MXD4-regulon          | DZ 2                  | 0.0738367568453174  |                       | -0.018649666921592   |

|                       |                      |                       |                  |                       |
|-----------------------|----------------------|-----------------------|------------------|-----------------------|
|                       | 16447425             | 0.477646728168156     |                  | 0.0327879668662792    |
| 0.0337383427174756    |                      | 90.5440414507772      | 88.5705317908708 |                       |
| MXI1-regulon          | DZ 2                 | 0.044502459114904     |                  | -0.0210858341723035   |
|                       | 7539502              | 0.218953329309437     |                  | 1.92687379493681e-158 |
| 4.3431123631909e-158  |                      | 100                   | 100              |                       |
| MYBL1-regulon         | DZ 2                 | 0.165024084052308     |                  | 0.137472743791682     |
|                       | 33664240             | 0.97763717373799      | 0                | 0                     |
| 79.7148237826204      |                      |                       |                  | 100                   |
| MYC-regulon           | DZ 2                 | 0.285379371289825     |                  | -0.0300130111429866   |
|                       | 12136410             | 0.352451312482488     |                  | 5.03880526303347e-45  |
| 7.37639533351292e-45  |                      | 100                   | 100              |                       |
| NFATC1-regulon        | DZ 2                 |                       |                  |                       |
|                       | 0.049524209601617    | -0.00101083020783418  |                  | 16693928              |
|                       | 0.484805377709567    | 0.147040025712313     |                  | 0.149140597508204     |
|                       | 96.6321243523316     | 94.79643081338        |                  |                       |
| NFE2L1-regulon        | DZ 2                 | 0.125825117227384     |                  | -0.0578258393994659   |
|                       | 9590291.5            | 0.278509940440761     |                  |                       |
| 3.71352616127399e-99  |                      | 6.93843045922245e-99  |                  | 100                   |
| 99.9349834095597      |                      |                       |                  |                       |
| NFE2L2-regulon        | DZ 2                 | 0.0923168341379362    |                  | -0.018884992368975    |
|                       | 8594203.5            | 0.249582726960987     |                  |                       |
| 3.33811152153192e-126 |                      | 6.67622304306383e-126 | 100              | 100                   |
| NFKB1-regulon         | DZ 2                 | 0.0282988399804644    |                  | -0.0288609800431138   |
|                       | 6139625.5            | 0.178299766209773     |                  |                       |
| 5.92793876100712e-207 |                      | 1.79099426396385e-206 |                  | 99.6113989637306      |
| 99.9372253609542      |                      |                       |                  |                       |
| NFKB2-regulon         | DZ 2                 | 0.0445277999060951    |                  | -0.0293481040428464   |
|                       | 4104028.5            | 0.119184357754108     |                  |                       |
| 3.80197127091715e-289 |                      | 1.99955526100087e-288 | 100              | 100                   |
| NFYA-regulon          | DZ 2                 | 0.00907716437620279   |                  | -0.0120767075590059   |
|                       | 6325984              | 0.183711770082192     |                  | 4.05094243622169e-200 |
| 1.12790946263427e-199 |                      | 92.4870466321243      | 99.1301228589364 |                       |
| NFYB-regulon          | DZ 2                 | 0.178978834445513     |                  | 0.0715716141727647    |
|                       | 33453224             | 0.971509095817518     | 0                | 0                     |
|                       |                      |                       | 0                | 100                   |
|                       |                      |                       | 0                | 100                   |
| NFYC-regulon          | DZ 2                 | 0.136365170038765     |                  | 0.0537448132447719    |
|                       | 33910380             | 0.984785281461315     | 0                | 0                     |
|                       |                      |                       | 0                | 100                   |
|                       |                      |                       | 0                | 100                   |
| NR1H3-regulon         | DZ 2                 |                       |                  |                       |
|                       | 0.0024517152801522   | -0.00618795105880769  |                  | 14807577.5            |
|                       | 0.430024210170978    | 3.73819195414101e-20  |                  |                       |
| 4.61585441293934e-20  |                      | 8.80829015544041      | 22.3343197919469 |                       |
| NR2C2-regulon         | DZ 2                 | 0.00828778398944933   |                  | -0.0137320127004945   |
|                       | 10203183.5           | 0.296308827410632     |                  | 2.5949262234124e-85   |
|                       | 4.60599404655701e-85 | 52.3316062176166      |                  | 76.3877679131916      |
| NR3C1-regulon         | DZ 2                 | 0.241824128972994     |                  | 0.0166294673877381    |
|                       | 26389517.5           | 0.766373258538118     |                  |                       |
| 1.5540076563219e-142  |                      | 3.29356846563747e-142 | 100              | 100                   |
| NRF1-regulon          | DZ 2                 | 0.0679466347988666    |                  | 0.0419308552155949    |
|                       | 33935598             | 0.985517632889636     | 0                | 0                     |
|                       |                      |                       | 0                | 100                   |
| 99.9663707290826      |                      |                       |                  |                       |
| PAX5-regulon          | DZ 2                 | 0.104943571279181     |                  | 0.00475682194037315   |

|                       |                       |                      |     |     |     |
|-----------------------|-----------------------|----------------------|-----|-----|-----|
| 19690041.5            | 0.571814974074678     |                      |     |     |     |
| 7.22973127892619e-12  | 8.27920840006063e-12  | 100                  | 100 |     |     |
| POU2F1-regulon DZ 2   |                       |                      |     |     |     |
| 0.00117791636383529   | -0.00376613934043978  | 15213268.5           |     |     |     |
| 0.441805809953149     | 1.91466848509798e-16  |                      |     |     |     |
| 2.32378568276849e-16  | 7.25388601036269      | 18.538696081069      |     |     |     |
| POU6F1-regulon DZ 2   |                       |                      |     |     |     |
| 0.0212304266378903    | -0.00994083054510801  | 14769576             |     |     |     |
| 0.428920615405203     | 4.2549710692397e-12   | 4.9122430230247e-12  |     |     |     |
| 58.0310880829015      | 65.4806743789795      |                      |     |     |     |
| REL-regulon DZ 2      |                       |                      |     |     |     |
| 0.255680727830987     | -0.00817025805056643  | 13703480             |     |     |     |
| 0.397960312116806     | 2.09089951661634e-22  |                      |     |     |     |
| 2.60445378385544e-22  | 100                   | 100                  |     |     |     |
| RELA-regulon DZ 2     | 0.0788777248012285    | -0.0134149711219682  |     |     |     |
| 6054720.5             | 0.175834055288148     |                      |     |     |     |
| 4.17420689114807e-210 | 1.31719417454006e-209 | 100                  | 100 |     |     |
| RELB-regulon DZ 2     | 0.13248489084559      | 0.027773737717741    |     |     |     |
| 31413769.5            | 0.912281662394181     | 0                    | 0   | 100 | 100 |
| REST-regulon DZ 2     | 0.214817595639985     | -0.0038666614972358  |     |     |     |
| 13917363              | 0.40417165007158      | 5.98798751753021e-20 |     |     |     |
| 7.33012265076974e-20  | 100                   | 100                  |     |     |     |
| RFX5-regulon DZ 2     | 0.15761601576808      | 0.0938644954068566   |     |     |     |
| 34237124.5            | 0.994274210054815     | 0                    | 0   | 100 | 100 |
| RXRA-regulon DZ 2     | 0.00380482116233411   | -0.0109109499519663  |     |     |     |
| 9872204.5             | 0.286696925459879     |                      |     |     |     |
| 2.05204369690654e-96  | 3.68848360709782e-96  | 29.6632124352332     |     |     |     |
| 64.8618957940992      |                       |                      |     |     |     |
| SETDB1-regulon DZ 2   |                       |                      |     |     |     |
| 0.0503717037454073    | -0.00950757941581987  | 12751190.5           |     |     |     |
| 0.370305043043143     | 3.47762383939513e-35  |                      |     |     |     |
| 4.84139789405988e-35  | 97.279792746114       | 95.0139000986459     |     |     |     |
| SOX5-regulon DZ 2     |                       |                      |     |     |     |
| 0.00266776113277242   | -0.00522442766196831  | 15239983             |     |     |     |
| 0.442581620970354     | 6.62179236570626e-14  |                      |     |     |     |
| 7.77102905727512e-14  | 12.0466321243523      | 22.67509640391       |     |     |     |
| SP1-regulon DZ 2      |                       |                      |     |     |     |
| 0.00438811319492802   | -0.00875470787394194  | 11470276             |     |     |     |
| 0.333106234111767     | 6.11969062056792e-61  |                      |     |     |     |
| 9.87495531955278e-61  | 34.3264248704663      | 60.2636534839925     |     |     |     |
| SP2-regulon DZ 2      |                       |                      |     |     |     |
| 0.0279360964383461    | -0.000309323253922161 | 16909516             |     |     |     |
| 0.491066230264439     | 0.393927967731083     | 0.393927967731083    |     |     |     |
| 100                   | 100                   |                      |     |     |     |
| SP3-regulon DZ 2      |                       |                      |     |     |     |
| 0.0221322005751347    | -0.00624393021073518  | 9447651              |     |     |     |
| 0.274367543188348     | 7.9313556279185e-103  |                      |     |     |     |
| 1.56423958217281e-102 | 100                   | 100                  |     |     |     |
| SP4-regulon DZ 2      | 0.0035220858949613    | -0.0052043826588813  |     |     |     |
| 15023241.5            | 0.43628726982826      | 3.29685808489947e-14 |     |     |     |

|                       |                     |                       |                       |     |
|-----------------------|---------------------|-----------------------|-----------------------|-----|
| 3.90128206713104e-14  |                     | 18.0051813471503      | 29.2059008160703      |     |
| SPI1-regulon          | DZ 2                | 0.45488920353578      | 0.0369753014059703    |     |
| 28417436.5            |                     | 0.825265691568822     | 1.61007207337017e-211 |     |
| 5.31698219578055e-211 |                     | 100                   | 100                   |     |
| SPIB-regulon          | DZ 2                | 0.597959537338163     | 0.0340882746895745    |     |
| 27832140.5            |                     | 0.808268215100019     |                       |     |
| 3.33820001213697e-190 |                     | 8.46472145934733e-190 | 100                   | 100 |
| SREBF1-regulon        | DZ 2                |                       |                       |     |
| 0.0330128190451332    |                     | -0.00805408847230126  | 13255074              |     |
| 0.384938233658265     |                     | 4.76452215283718e-28  |                       |     |
| 6.20699216241174e-28  |                     | 95.8549222797927      | 96.9128329297821      |     |
| SREBF2-regulon        | DZ 2                |                       |                       |     |
| 0.0930457394111704    |                     | -0.00603964956325727  | 11640727.5            |     |
| 0.3380562856418       | 7.1239387499216e-54 | 1.09956445922703e-53  |                       | 100 |
| 100                   |                     |                       |                       |     |
| SRF-regulon           | DZ 2                | 0.0076912808545724    | -0.0133042457480832   |     |
| 5820742.5             |                     | 0.169039142031919     |                       |     |
| 6.41604075941348e-219 |                     | 2.27769446959178e-218 | 86.139896373057       |     |
| 98.1391803425702      |                     |                       |                       |     |
| STAT1-regulon         | DZ 2                | 0.0592102161210909    | -0.020914114299857    |     |
| 3086318.5             |                     | 0.0896292236389496    | 0                     | 0   |
| 100                   |                     |                       |                       | 100 |
| STAT2-regulon         | DZ 2                | 0.0533281183958122    | -0.0131296156401926   |     |
| 11216934              | 0.325748974394359   | 4.35931989296919e-62  |                       |     |
| 7.11521177932902e-62  |                     | 99.8704663212435      | 99.9641287776881      |     |
| STAT5A-regulon        | DZ 2                | 0.0579132499397872    | -0.013931602324013    |     |
| 9479382.5             |                     | 0.275289052005373     |                       |     |
| 5.26893010281115e-102 |                     | 1.01106496567457e-101 | 100                   | 100 |
| TBP-regulon           | DZ 2                |                       |                       |     |
| 0.019899209973225     |                     | -0.00101939871435887  | 16764453              |     |
| 0.486853481622736     |                     | 0.179660180787204     | 0.180934366466546     |     |
| 48.3160621761658      | 49.9125638956147    |                       |                       |     |
| TCF12-regulon         | DZ 2                |                       |                       |     |
| 0.00208335770009006   |                     | -0.00708082450900932  | 14248563              |     |
| 0.413789970043812     |                     | 4.04511190282725e-27  |                       |     |
| 5.12862401965598e-27  |                     | 8.93782383419689      | 25.5021971123666      |     |
| TFDP1-regulon         | DZ 2                | 0.610453979971549     | 0.0837149535989418    |     |
| 32213729.5            |                     | 0.935513157699093     | 0                     | 0   |
| 100                   |                     |                       |                       | 100 |
| TFDP2-regulon         | DZ 2                | 0.0680408621428374    | 0.0416259065868703    |     |
| 33668326              | 0.9777558345333     | 0                     | 0                     | 100 |
| 99.995516097211       |                     |                       |                       |     |
| TFEC-regulon          | DZ 2                | 0.0669058699585809    | -0.0250620663696472   |     |
| 6069406.5             |                     | 0.176260548787883     |                       |     |
| 1.47079665277472e-209 |                     | 4.54028531943502e-209 | 100                   | 100 |
| THAP1-regulon         | DZ 2                |                       |                       |     |
| 0.0347670827738959    |                     | -0.00243953504726525  | 14322830.5            |     |
| 0.415946759230218     |                     | 1.04979744733797e-15  |                       |     |
| 1.26331557222027e-15  |                     | 100                   | 100                   |     |
| THAP11-regulon        | DZ 2                | 0.167907625239301     | -0.0107530302987386   |     |



|                       |            |                       |                  |                       |
|-----------------------|------------|-----------------------|------------------|-----------------------|
|                       | 7623103    | 0.221381171000254     |                  | 9.45029303265332e-156 |
| 2.09678376661996e-155 |            | 100                   | 100              |                       |
| TP53-regulon          | DZ 2       | 0.088121857475824     |                  | -0.0104119778307377   |
|                       | 12389364   | 0.359797304361281     |                  | 8.0187452633551e-41   |
| 1.15016346201659e-40  |            | 100                   | 100              |                       |
| USF2-regulon          | DZ 2       |                       |                  |                       |
| 0.119005119672567     |            | -0.00638979761428962  |                  | 11806302.5            |
| 0.342864719607387     |            | 7.93488541819651e-51  |                  |                       |
| 1.19867418019564e-50  |            | 100                   | 100              |                       |
| XBP1-regulon          | DZ 2       | 0.167955239693469     |                  | -0.02780773096917     |
|                       | 4084918    | 0.118629373141097     |                  | 5.5327728083547e-290  |
| 3.02174514917834e-289 |            | 100                   | 100              |                       |
| YBX1-regulon          | DZ 2       | 0.128546137088777     |                  | 0.0339398065756577    |
|                       | 33896477   | 0.984381526924558     | 0                | 0 100 100             |
| YY1-regulon           | DZ 2       | 0.705465645454182     |                  | 0.0671365338922607    |
|                       | 31152836   | 0.904703939282845     | 0                | 0 100 100             |
| YY2-regulon           | DZ 2       | 0.0378482552266465    |                  | -0.0133814659588444   |
|                       | 13458088.5 | 0.390833941448129     |                  |                       |
| 1.97301648956641e-25  |            | 2.4793658541454e-25   |                  | 90.4145077720207      |
| 90.5322392610528      |            |                       |                  |                       |
| ZBTB33-regulon        | DZ 2       | 0.352006284588407     |                  | -0.0140589191719858   |
|                       | 10329439   | 0.299975390808139     |                  | 3.20036545737849e-81  |
| 5.47532403551501e-81  |            | 100                   | 100              |                       |
| ZNF143-regulon        | DZ 2       |                       |                  |                       |
| 0.017177682853995     |            | -0.00625954919160726  |                  | 9654695.5             |
| 0.280380285487535     |            | 1.60268799047529e-97  |                  |                       |
| 2.91771403394219e-97  |            | 100                   | 99.9932741458165 |                       |
| ZNF274-regulon        | DZ 2       | 0.047104807874297     |                  | -0.0185523616386521   |
|                       | 4697337.5  | 0.136414538322965     |                  |                       |
| 9.16853436005297e-264 |            | 3.82921140919859e-263 | 100              | 100                   |
| ZNF76-regulon         | DZ 2       |                       |                  |                       |
| 0.0112381015925816    |            | -0.00337644994838587  |                  | 12728303.5            |
| 0.369640385768975     |            | 1.59016946559714e-35  |                  |                       |
| 2.23568380311678e-35  |            | 99.2227979274611      | 99.464173616716  |                       |
| ATF1-regulon          | DZ 3       |                       |                  |                       |
| 0.102201553162691     |            | -0.00413086592240695  |                  | 22365190.5            |
| 0.434226514035357     |            | 1.63755623653564e-14  |                  |                       |
| 1.97061852193271e-14  |            | 100                   | 100              |                       |
| ATF3-regulon          | DZ 3       | 0.0383292350273652    |                  | -0.0130270061379358   |
|                       | 12597162   | 0.244577471495209     |                  | 2.9102142610343e-195  |
| 6.88750708444783e-195 |            | 100                   | 100              |                       |
| ATF4-regulon          | DZ 3       | 0.087990156650212     |                  | -0.0213085698854496   |
|                       | 9473727    | 0.183935095483879     |                  | 7.37938698280565e-298 |
| 2.61968237889601e-297 |            | 100                   | 100              |                       |
| ATF5-regulon          | DZ 3       |                       |                  |                       |
| 0.111517219240823     |            | -0.00709847103720826  |                  | 22757667              |
| 0.441846556549003     |            | 1.14509033969352e-11  |                  |                       |
| 1.32197421330471e-11  |            | 100                   | 99.9977381194725 |                       |
| ATF6-regulon          | DZ 3       | 0.119871977104282     |                  | -0.0169778643060616   |
|                       | 10878310.5 | 0.211205482332432     |                  |                       |

|                       |                       |                      |     |
|-----------------------|-----------------------|----------------------|-----|
| 4.94181562835024e-249 | 1.37595650828575e-248 | 100                  | 100 |
| ATF6B-regulon DZ 3    |                       |                      |     |
| 0.052767828010656     | -0.00464801832479883  | 13855485.7597656     |     |
| 0.269008184022826     | 4.2822411741877e-160  |                      |     |
| 9.80771365701055e-160 | 100 99.9185723010111  |                      |     |
| BACH1-regulon DZ 3    | 0.0175896061464413    | -0.0263702696880569  |     |
| 6953531.5             | 0.135004785382 0      | 0                    |     |
| 96.824034334764       | 99.6358372350772      |                      |     |
| BATF-regulon DZ 3     | 0.00868782063396714   | -0.0108849980872059  |     |
| 20772470              | 0.403303393995416     | 4.54423177668891e-33 |     |
| 6.51798901302853e-33  | 39.1416309012876      | 52.0481328176246     |     |
| BATF3-regulon DZ 3    |                       |                      |     |
| 0.0806851187707392    | -0.00254380679009775  | 27886805.5           |     |
| 0.541430234624964     | 1.32984160506187e-06  |                      |     |
| 1.44150769403653e-06  | 100 100               |                      |     |
| BCL11A-regulon DZ 3   |                       |                      |     |
| 0.196171223806185     | -0.00854858745953746  | 18424635             |     |
| 0.357719511864825     | 6.38224934253535e-62  |                      |     |
| 1.02986296209093e-61  | 100 100               |                      |     |
| BHLHE40-regulon DZ 3  | 0.0317646384074757    | -0.0245159699196796  |     |
| 5804082               | 0.112687897473324 0   | 0 100 100            |     |
| BRF2-regulon DZ 3     |                       |                      |     |
| 0.0330392381557943    | -0.00879900605060021  | 17820299             |     |
| 0.345986157097019     | 3.07757797357786e-72  |                      |     |
| 5.20257228866733e-72  | 99.9141630901288      | 99.7240505756486     |     |
| CEBPB-regulon DZ 3    | 0.120606187341229     | -0.0230783559575807  |     |
| 7573656.5             | 0.14704468806095 0    | 0 100 100            |     |
| CEBPG-regulon DZ 3    |                       |                      |     |
| 0.0614930271384601    | -0.00674077163626462  | 23368621.5           |     |
| 0.453708411370638     | 6.56815833107595e-08  |                      |     |
| 7.28655064853738e-08  | 100 100               |                      |     |
| CLOCK-regulon DZ 3    | 0.0057448572048595    | -0.0101094229978013  |     |
| 18658788              | 0.362265658741639     | 1.33043566716189e-65 |     |
| 2.19676586903475e-65  | 29.0128755364807      | 51.6749225305919     |     |
| CREB1-regulon DZ 3    |                       |                      |     |
| 0.0397165042087179    | -0.00334045626945401  | 22637216.5           |     |
| 0.439507975944075     | 1.66615149629249e-12  |                      |     |
| 1.93929108584863e-12  | 100 99.9932143584176  |                      |     |
| CREB3-regulon DZ 3    | 0.227521384436132     | -0.0126021821108583  |     |
| 18216720              | 0.353682783196422     | 2.22433410520965e-65 |     |
| 3.63052233264104e-65  | 100 100               |                      |     |
| CREB3L2-regulon DZ 3  | 0.108678039980314     | -0.0185760922495335  |     |
| 8618896.5             | 0.167338318983983     | 0 0 100              |     |
| 100                   |                       |                      |     |
| CREB3L4-regulon DZ 3  | 0.00405419050688691   | -0.0072328530178547  |     |
| 21269479              | 0.412952964631275     | 4.73690280323934e-35 |     |
| 6.93443503154625e-35  | 15.450643776824       | 31.7658501277963     |     |
| CREB5-regulon DZ 3    | 0.024860728286126     | -0.0146907603961333  |     |
| 15154342.5            | 0.294225855857246     |                      |     |
| 1.91536752531418e-127 | 3.8854598370659e-127  | 99.5708154506438     |     |

99.6245278324399  
CREM-regulon DZ 3 0.153214664104979 0.00329982703597478  
29630874 0.5752918189917 1.53386443749528e-18  
1.96224099211108e-18 100 100  
CTCF-regulon DZ 3 0.416879481229578 0.047252405044529  
46285968.5 0.898655200388539 0 0 100  
100  
CUX1-regulon DZ 3 0.0975449622475231 0.0213962313945543  
43312776 0.840929825108097 0 0 100 100  
DDIT3-regulon DZ 3 0.0585647996407548 -0.0270374981814124  
7219250.5 0.140163795097699 0 0 100  
100  
E2F1-regulon DZ 3 0.548581428130687 0.113808459438674  
48141692.5 0.934684607941841 0 0 100  
100  
E2F2-regulon DZ 3 0.0745811520764111 0.0212045741974536  
45371870 0.880907718866307 0 0 100 100  
E2F3-regulon DZ 3  
0.0156765968559845 -0.00558202032822258 14983729  
0.290913346386228 1.62468906147778e-131  
3.39273304014477e-131 100 100  
E2F4-regulon DZ 3 0.421848658666791 0.0238022444560282  
37001770.5 0.718399864170677  
2.60887267406407e-143 5.69938338026305e-143 100 100  
E2F6-regulon DZ 3 0.0664021994816857 -0.0061570994996485  
26006565.5 0.504924841981435 0.565448453102871  
0.565448453102871 100 100  
E2F7-regulon DZ 3  
0.0303723823323619 -0.00020695843842897 25245770  
0.490153781665235 0.250501568847095 0.255908077527248  
100 100  
E2F8-regulon DZ 3 0.10453535189943 0.0305223839266624  
46626428 0.90526531810049 0 0 100 100  
EGR1-regulon DZ 3  
0.0402653458908202 -0.00738732718638489 14645277  
0.284342204855898 8.75463989576765e-140  
1.88357403818031e-139 100 100  
EGR2-regulon DZ 3 0.0306920330784365 -0.0157605169129437  
12153831.5 0.235970084154576  
1.67973750811338e-208 4.18460923073861e-208 100  
99.9954762389451  
EGR3-regulon DZ 3 0.0233748937069909 -0.0185731017719483  
8456995 0.164194955462796 0 0 100  
99.9954762389451  
ELF1-regulon DZ 3 0.779489256281213 0.0743535976039891  
46660478.5 0.905926418211225 0 0 100  
100  
ELF2-regulon DZ 3 0.0158225301317256 -0.017277110744838  
10483096 0.203532280772569 2.51117053313044e-262  
7.75187425444615e-262 98.7124463519313 99.5566714166158

|                       |      |                       |                      |                     |         |
|-----------------------|------|-----------------------|----------------------|---------------------|---------|
| ELF4-regulon          | DZ 3 |                       |                      |                     |         |
| 0.0134068442257676    |      | -0.00517307303445507  |                      | 18494121.5          |         |
| 0.359068611961581     |      | 8.68736861713786e-61  |                      |                     |         |
| 1.37067371514842e-60  |      | 96.824034334764       | 98.3759697812762     |                     |         |
| ELK1-regulon          | DZ 3 | 0.069359414566686     |                      | 0.00339151831953875 |         |
| 30098197              |      | 0.58436502752165      | 7.12706325063279e-23 |                     |         |
| 9.54757529801751e-23  |      | 100                   | 100                  |                     |         |
| ELK3-regulon          | DZ 3 |                       |                      |                     |         |
| 0.0559910824294859    |      | -0.00914927550726393  |                      | 17460868            |         |
| 0.339007702334193     |      | 9.27413589515845e-79  |                      |                     |         |
| 1.60600889891768e-78  |      | 100                   | 100                  |                     |         |
| ELK4-regulon          | DZ 3 | 0.0325982869776861    |                      | -0.0127254645988985 |         |
| 18626129              |      | 0.361631574997891     | 1.15429343598242e-58 |                     |         |
| 1.80120514186268e-58  |      | 92.7896995708155      | 96.8333672615412     |                     |         |
| ESRRA-regulon         | DZ 3 |                       |                      |                     |         |
| 0.0901662127099427    |      | -0.00161087085583585  |                      | 28924174.5          |         |
| 0.561571047851587     |      | 6.67968545877744e-13  |                      |                     |         |
| 7.83896971195368e-13  |      | 100                   | 100                  |                     |         |
| ETS1-regulon          | DZ 3 | 0.299877327087883     |                      | 0.0584386977402767  |         |
| 46136031              |      | 0.895744121319117     | 0                    | 0                   | 100 100 |
| ETV2-regulon          | DZ 3 |                       |                      |                     |         |
| 0.0217718482748041    |      | -0.00701015887133963  |                      | 15145947.5          |         |
| 0.294062864552284     |      | 1.21181127785145e-127 |                      |                     |         |
| 2.49387248485371e-127 |      | 100                   | 100                  |                     |         |
| ETV3-regulon          | DZ 3 | 0.006240087247341     |                      | -0.0053257023320311 |         |
| 16976648              |      | 0.329606433758984     | 2.49334838666323e-88 |                     |         |
| 4.4817148215972e-88   |      | 69.4420600858369      | 84.7413539616837     |                     |         |
| ETV5-regulon          | DZ 3 |                       |                      |                     |         |
| 0.0322726475996158    |      | -0.00122237837159614  |                      | 23596653.5          |         |
| 0.458135717297163     |      | 1.02958316132201e-06  |                      |                     |         |
| 1.12462160698251e-06  |      | 100                   | 100                  |                     |         |
| ETV6-regulon          | DZ 3 | 0.431011434520693     |                      | -0.0293161336936235 |         |
| 8355246               |      | 0.162219469782198     | 0                    | 0                   | 100 100 |
| ETV7-regulon          | DZ 3 |                       |                      |                     |         |
| 0.0591961649507477    |      | -0.00500850471259705  |                      | 21617499            |         |
| 0.41970987159411      |      | 7.21867403948665e-21  | 9.49121957043615e-21 |                     | 100     |
| 100                   |      |                       |                      |                     |         |
| FLI1-regulon          | DZ 3 | 0.13494133162114      | -0.00922708347251436 |                     |         |
| 18484461              |      | 0.358881050615353     | 6.05516925961663e-61 |                     |         |
| 9.66105657152316e-61  |      | 100                   | 100                  |                     |         |
| FOS-regulon           | DZ 3 | 0.0628157224499075    |                      | -0.0240800419724041 |         |
| 6521958.5             |      | 0.12662567323709      | 0                    | 0                   | 100 100 |
| FOSB-regulon          | DZ 3 | 0.0169924072373697    |                      | -0.0251261732268831 |         |
| 8204824               |      | 0.159298984007922     | 0                    | 0                   |         |
| 96.0515021459228      |      | 99.4096491823302      |                      |                     |         |
| FOSL1-regulon         | DZ 3 | 0.0473458702639151    |                      | -0.0138021990724814 |         |
| 16554516              |      | 0.321410621305575     | 1.77094451000267e-96 |                     |         |
| 3.3088700055313e-96   |      | 100                   | 100                  |                     |         |
| FOXO1-regulon         | DZ 3 |                       |                      |                     |         |
| 0.0101346566166213    |      | -0.00673525179120056  |                      | 22138380            |         |

|                       |                    |                       |                       |
|-----------------------|--------------------|-----------------------|-----------------------|
| 0.429822923877624     |                    | 4.20668331298966e-18  |                       |
| 5.33347348611189e-18  |                    | 44.2918454935622      | 52.554794055778       |
| FOX03-regulon         | DZ 3               | 0.00723891504308656   | -0.0128345156853281   |
| 19642930.5            |                    | 0.381373064381177     |                       |
| 5.05825272015243e-51  |                    | 7.6411902793792e-51   | 28.2403433476395      |
| 47.2484223383321      |                    |                       |                       |
| GABPA-regulon         | DZ 3               |                       |                       |
| 0.0243217120494693    |                    | -0.00119694578015976  | 23724768.5            |
| 0.460623106342459     |                    | 4.315057356944e-06    |                       |
| 4.60705371944397e-06  |                    | 100                   | 100                   |
| GTF2B-regulon         | DZ 3               | 0.0735829201918458    | -0.005618306851094    |
| 21964743.5            |                    | 0.426451722004593     |                       |
| 9.18883813301925e-18  |                    | 1.15470355299888e-17  | 100                   |
| HINFP-regulon         | DZ 3               | 0.0179135086008619    | 0.00172731009141002   |
| 27809605              | 0.539931365031308  |                       | 1.74754805032992e-06  |
| 1.87993805414279e-06  |                    | 71.4163090128755      | 63.0182533758567      |
| HIVEP3-regulon        | DZ 3               | 0.0561181932157559    | -0.0221381573669963   |
| 14871602.5            |                    | 0.288736378601135     |                       |
| 3.16013799130697e-134 |                    | 6.69760589202372e-134 | 99.8283261802575      |
| 99.6901223677365      |                    |                       |                       |
| H0XB2-regulon         | DZ 3               | 0.0106425183612599    | -0.027157456625291    |
| 11507978              | 0.223430655354158  |                       | 1.49853460146457e-229 |
| 3.86894388014489e-229 |                    | 55.6223175965665      | 84.4699282983873      |
| IKZF1-regulon         | DZ 3               | 0.146774420383883     | 0.00298697603423981   |
| 29917400              | 0.580854802511134  |                       | 3.85783704244368e-21  |
| 5.11974635539255e-21  |                    | 100                   | 100                   |
| IRF1-regulon          | DZ 3               | 0.0975417205515296    | -0.0388994417378725   |
| 3607572               | 0.0700420331180081 | 0                     | 0                     |
|                       |                    |                       | 100                   |
|                       |                    |                       | 100                   |
| IRF2-regulon          | DZ 3               | 0.0581638653640674    | -0.0275642507099967   |
| 5470094               | 0.106203425768527  | 0                     | 0                     |
|                       |                    |                       | 100                   |
|                       |                    |                       | 100                   |
| IRF3-regulon          | DZ 3               | 0.13322290938401      | -0.012545722904218    |
| 12436898.5            | 0.241465910208391  |                       | 5.35406338729942e-200 |
| 1.28860508643477e-199 |                    | 100                   | 100                   |
| IRF4-regulon          | DZ 3               | 0.0388986710152653    | -0.0200278822117835   |
| 8603015.5             | 0.167029984866757  |                       | 0                     |
|                       |                    |                       | 0                     |
|                       |                    |                       | 100                   |
| 99.9954762389451      |                    |                       |                       |
| IRF5-regulon          | DZ 3               | 0.007591635697023     | -0.0404927462158583   |
| 8686871               | 0.16865806317209   | 0                     | 0                     |
|                       |                    |                       | 32.1888412017167      |
| 81.7511479043677      |                    |                       |                       |
| IRF7-regulon          | DZ 3               | 0.0834384967974421    | -0.0250390604022539   |
| 7099641.5             | 0.137841552453835  |                       | 0                     |
|                       |                    |                       | 0                     |
|                       |                    |                       | 100                   |
| IRF8-regulon          | DZ 3               | 0.104282712374728     | 0.0231029411011707    |
| 42710180.5            | 0.829230262641218  |                       | 0                     |
|                       |                    |                       | 0                     |
|                       |                    |                       | 100                   |
| IRF9-regulon          | DZ 3               | 0.0229342641123181    | -0.0112713415609641   |
| 11440207              | 0.222114862176242  |                       | 9.89726329180431e-231 |
| 2.60261368043743e-230 |                    | 100                   | 100                   |
| JUN-regulon           | DZ 3               | 0.058222656491571     | -0.0309728347185429   |
| 3197106.5             | 0.0620727290695235 |                       | 0                     |
|                       |                    |                       | 0                     |
|                       |                    |                       | 100                   |

100

|                       |      |                       |                       |   |     |     |
|-----------------------|------|-----------------------|-----------------------|---|-----|-----|
| JUNB-regulon          | DZ 3 | 0.12475910255445      | -0.0359462862930801   |   |     |     |
| 4581921.5             |      | 0.0889593048862541    | 0                     | 0 | 100 | 100 |
| JUND-regulon          | DZ 3 | 0.0242350329085473    | -0.014597434711699    |   |     |     |
| 8540816               |      | 0.165822363940848     | 0                     | 0 | 100 | 100 |
| KLF11-regulon         | DZ 3 | 0.00373189642443036   | -0.0186842989565289   |   |     |     |
| 17931292              |      | 0.348141117658268     | 4.0218649618585e-88   |   |     |     |
| 7.13881030729884e-88  |      | 14.0772532188841      | 41.5643165727986      |   |     |     |
| KLF12-regulon         | DZ 3 | 0.0522195647149752    | 0.00530617248013459   |   |     |     |
| 29723074              |      | 0.577081908130179     | 2.33895119579695e-19  |   |     |     |
| 3.01937336184697e-19  |      | 99.3991416309013      | 98.581800909276       |   |     |     |
| KLF13-regulon         | DZ 3 | 0.0520865842183607    | -0.0145798427450423   |   |     |     |
| 9244892               |      | 0.179492199084705     | 3.13969251383774e-306 |   |     |     |
| 1.14317009478195e-305 |      | 100                   | 100                   |   |     |     |
| KLF2-regulon          | DZ 3 | 0.083888753476351     | -0.0256173220915557   |   |     |     |
| 9884271               |      | 0.191905923632118     | 3.92566095377418e-283 |   |     |     |
| 1.29638105915333e-282 |      | 100                   | 100                   |   |     |     |
| KLF3-regulon          | DZ 3 | 0.0381943846877661    | -0.0347264111344843   |   |     |     |
| 9619910               |      | 0.186773279871409     | 1.42734615603639e-292 |   |     |     |
| 4.82578938469445e-292 |      | 99.8283261802575      | 99.8642871683518      |   |     |     |
| KLF4-regulon          | DZ 3 | 0.00884200324985244   | -0.0072437675029622   |   |     |     |
| 21329619              |      | 0.414120599780821     | 7.89677269067277e-27  |   |     |     |
| 1.08868128356848e-26  |      | 37.0815450643777      | 50.1481531745493      |   |     |     |
| KLF6-regulon          | DZ 3 | 0.0319661000647982    | -0.0383996639168906   |   |     |     |
| 4448481.5             |      | 0.0863685294563342    | 0                     | 0 | 100 |     |
| 100                   |      |                       |                       |   |     |     |
| KLF7-regulon          | DZ 3 | 0.0151846434303559    | -0.0316260738880204   |   |     |     |
| 7026578               |      | 0.136423003888008     | 0                     | 0 |     |     |
| 84.549356223176       |      | 97.8987129899799      |                       |   |     |     |
| KLF8-regulon          | DZ 3 | 0.00500966844314483   | -0.020626630907841    |   |     |     |
| 10969184.5            |      | 0.212969826804993     |                       |   |     |     |
| 8.75882660393125e-249 |      | 2.39183341876584e-248 | 38.5407725321888      |   |     |     |
| 78.6659428648979      |      |                       |                       |   |     |     |
| MAFB-regulon          | DZ 3 |                       |                       |   |     |     |
| 0.0496235237692292    |      | -0.00632168690784988  | 18910789              |   |     |     |
| 0.367158329598318     |      | 3.27488717807696e-54  |                       |   |     |     |
| 5.00036536867664e-54  |      | 100                   | 99.9977381194725      |   |     |     |
| MAFF-regulon          | DZ 3 |                       |                       |   |     |     |
| 0.0045363302590841    |      | -0.00805747840518162  | 21842189              |   |     |     |
| 0.424072291643186     |      | 1.01762249412683e-28  |                       |   |     |     |
| 1.43071677392089e-28  |      | 14.8497854077253      | 28.9068331410735      |   |     |     |
| MAFG-regulon          | DZ 3 | 0.00840873147770427   | -0.0174465502936193   |   |     |     |
| 16855539              |      | 0.327255068189873     | 3.79787063544257e-97  |   |     |     |
| 7.19063506977127e-97  |      | 32.618025751073       | 59.2861505055303      |   |     |     |
| MAX-regulon           | DZ 3 | 0.185195263965061     | -0.01280367216117     |   |     |     |
| 10192334              |      | 0.19788705411224      | 2.49608658434103e-272 |   |     |     |
| 7.87653988836502e-272 |      | 100                   | 100                   |   |     |     |
| MAZ-regulon           | DZ 3 | 0.161447435494662     | 0.025806179662286     |   |     |     |
| 44127985.5            |      | 0.856757348660535     | 0                     | 0 | 100 |     |
| 100                   |      |                       |                       |   |     |     |

|                       |                      |                       |                       |     |
|-----------------------|----------------------|-----------------------|-----------------------|-----|
| MEF2A-regulon         | DZ 3                 |                       |                       |     |
| 0.0356155003844409    |                      | -0.00527422731627487  | 20351522.5            |     |
| 0.395130578945309     |                      | 1.92136811694925e-34  |                       |     |
| 2.78402318986524e-34  |                      | 100                   | 99.9977381194725      |     |
| MLX-regulon           | DZ 3                 |                       |                       |     |
| 0.047411650504319     |                      | -0.00565910110522973  | 21378175              |     |
| 0.41506332828633      | 3.66257671691929e-23 | 4.95319898859562e-23  | 100                   |     |
|                       | 99.9886905973626     |                       |                       |     |
| MXD4-regulon          | DZ 3                 |                       |                       |     |
| 0.0730612175657893    |                      | -0.019611422806961    |                       |     |
| 24877578.5            |                      | 0.483005239311328     | 0.0471562587275604    |     |
| 0.0485231068066201    |                      | 90.2145922746781      | 88.5616701725815      |     |
| MXI1-regulon          | DZ 3                 |                       |                       |     |
| 0.0414089321444141    |                      | -0.0244483143840757   |                       |     |
| 9509440.5             |                      | 0.18462848321107      | 1.45857985790776e-296 |     |
| 5.05166682494881e-296 |                      | 100                   | 100                   |     |
| MYBL1-regulon         | DZ 3                 |                       |                       |     |
| 0.059692935960181     |                      | 0.0305880456957728    |                       |     |
| 40791553              | 0.791979565802424    | 1.58889833179712e-256 |                       |     |
| 4.60456251255493e-256 |                      | 98.4549356223176      | 79.575218836941       |     |
| MYC-regulon           | DZ 3                 |                       |                       |     |
| 0.305866064344224     |                      | -0.00925326649443287  | 28033624              |     |
| 0.544280757425157     |                      | 2.36713152625363e-07  |                       |     |
| 2.60567966455826e-07  |                      | 100                   | 100                   |     |
| NFATC1-regulon        | DZ 3                 |                       |                       |     |
| 0.0376575059033336    |                      | -0.0131992177875085   |                       |     |
| 20196101              | 0.392113026461187    | 2.33230082968061e-36  |                       |     |
| 3.44986164390257e-36  |                      | 92.1888412017167      | 94.8971975300265      |     |
| NFE2L1-regulon        | DZ 3                 |                       |                       |     |
| 0.142676570048627     |                      | -0.0410443603935005   |                       |     |
| 18734572              | 0.363737026586221    | 6.04141068642251e-57  |                       |     |
| 9.32478605947823e-57  |                      | 99.9141630901288      | 99.9366673452308      |     |
| NFE2L2-regulon        | DZ 3                 |                       |                       |     |
| 0.0908177968658546    |                      | -0.0205914029287675   |                       |     |
| 11491149.5            |                      | 0.223103925255818     |                       |     |
| 4.16878839008887e-229 |                      | 1.05708562748682e-228 | 100                   | 100 |
| NFKB1-regulon         | DZ 3                 |                       |                       |     |
| 0.0303571752295727    |                      | -0.027004956539764    |                       |     |
| 10113494.5            |                      | 0.19635636286893      | 4.49356390127957e-275 |     |
| 1.45019562268568e-274 |                      | 99.7424892703863      | 99.9366673452308      |     |
| NFKB2-regulon         | DZ 3                 |                       |                       |     |
| 0.0433902979078611    |                      | -0.0307764611386077   |                       |     |
| 5073670               | 0.0985067414232742   | 0                     | 0                     | 100 |
|                       |                      |                       |                       | 100 |
| NFYA-regulon          | DZ 3                 |                       |                       |     |
| 0.0101385632748824    |                      | -0.0110946919892202   |                       |     |
| 10703386.5            |                      | 0.207809283281897     |                       |     |
| 7.12141772981014e-255 |                      | 2.02248263526608e-254 | 94.8497854077253      |     |
| 99.1269141163964      |                      |                       |                       |     |
| NFYB-regulon          | DZ 3                 |                       |                       |     |
| 0.150929996654607     |                      | 0.0434198777444947    |                       |     |
| 47582819.5            |                      | 0.923833930207686     | 0                     | 0   |
|                       |                      |                       |                       | 100 |
|                       |                      |                       |                       |     |
| NFYC-regulon          | DZ 3                 |                       |                       |     |
| 0.101403302592859     |                      | 0.0183394167230867    |                       |     |
| 43499083              | 0.844547028330685    | 0                     | 0                     | 100 |
|                       |                      |                       |                       | 100 |
| NR1H3-regulon         | DZ 3                 |                       |                       |     |
| 0.00388652873696773   |                      | -0.00477033483998545  | 23071303              |     |
| 0.447935888404057     |                      | 5.88997771939126e-17  | 7.2728420535092e-17   |     |
| 12.4463519313305      |                      | 22.3586890140463      |                       |     |
| NR2C2-regulon         | DZ 3                 |                       |                       |     |
| 0.0103584359042042    |                      | -0.0117288637038054   |                       |     |
| 16951282.5            |                      | 0.329113955385426     |                       |     |

|                       |                       |                       |
|-----------------------|-----------------------|-----------------------|
| 1.02972919632302e-89  | 1.87463520356241e-89  | 57.5107296137339      |
| 76.465133111669       |                       |                       |
| NR3C1-regulon DZ 3    | 0.227502302655148     | 0.0020780704431948    |
| 27112328              | 0.526393534399951     | 0.00206766373850693   |
| 0.0021588841975587    | 100                   | 100                   |
| NRF1-regulon DZ 3     |                       |                       |
| 0.0242752297938228    | -0.00251859961259579  | 22218640              |
| 0.431381194531142     | 1.1624137844523e-15   | 1.4229548051054e-15   |
| 100                   | 99.9660717920879      |                       |
| PAX5-regulon DZ 3     | 0.101140625736504     | 0.00089594962529374   |
| 26189738.5            | 0.508481197705541     | 0.322260622097767     |
| 0.326864345270592     | 100                   | 100                   |
| POU2F1-regulon DZ 3   |                       |                       |
| 0.00184212740890347   | -0.00311790366107896  | 23577755              |
| 0.457768797561984     | 2.834376210514e-13    |                       |
| 3.38219682263015e-13  | 10.5579399141631      | 18.5519440863134      |
| POU6F1-regulon DZ 3   |                       |                       |
| 0.022062920957328     | -0.00917476518050238  | 22398007.5            |
| 0.434863665393898     | 8.15708947560738e-15  |                       |
| 9.90005731227562e-15  | 59.2274678111588      | 65.5153694781842      |
| REL-regulon DZ 3      |                       |                       |
| 0.259490489231246     | -0.00433273295761871  | 24285717.5            |
| 0.471514090205155     | 0.000885663523752306  | 0.0009315868175765    |
| 100                   | 100                   |                       |
| RELA-regulon DZ 3     | 0.0788953964655497    | -0.0135160820267361   |
| 9133020.5             | 0.177320182196903     | 0                     |
| 100                   |                       | 100                   |
| RELB-regulon DZ 3     | 0.12060657011971      | 0.0158292984982144    |
| 40853794.5            | 0.79318800217024      | 1.33251550788434e-256 |
| 3.94202504415783e-256 | 100                   | 100                   |
| REST-regulon DZ 3     | 0.215293732315126     | -0.0034123496788479   |
| 21318138              | 0.413897692910985     | 9.29622477532435e-24  |
| 1.26929222893852e-23  | 100                   | 100                   |
| RFX5-regulon DZ 3     | 0.0745443289413349    | 0.00943817356940649   |
| 35628105.5            | 0.691729768764944     |                       |
| 6.68132012598891e-111 | 1.33626402519778e-110 | 100                   |
| RXRA-regulon DZ 3     |                       | 100                   |
| 0.00520363121221489   | -0.00957226949931276  | 16345160.5            |
| 0.317345924921293     | 1.46672094526972e-105 |                       |
| 2.85307361956576e-105 | 35.6223175965665      | 65.0177557621406      |
| SETDB1-regulon DZ 3   |                       |                       |
| 0.0572025644201879    | -0.00258123404321058  | 24276182.5            |
| 0.471328965477005     | 0.000818838251411087  |                       |
| 0.000867724117166973  | 98.7124463519313      | 94.9560064237407      |
| SOX5-regulon DZ 3     |                       |                       |
| 0.00409226983404218   | -0.00380882279535902  | 23677723.5            |
| 0.459709714330314     | 1.25729328322758e-10  |                       |
| 1.41694957316124e-10  | 15.2789699570815      | 22.684399810002       |
| SP1-regulon DZ 3      |                       |                       |
| 0.0045431355275226    | -0.00867342282792732  | 17114671.5            |



|                       |                            |                       |                          |
|-----------------------|----------------------------|-----------------------|--------------------------|
| 0.332286199140815     |                            | 4.27003981351406e-91  |                          |
| 7.87461887687008e-91  |                            | 33.8197424892704      | 60.5075659903644         |
| SP2-regulon           | DZ 3                       |                       |                          |
| 0.0275302955150851    |                            | -0.000728567033359044 | 24701114                 |
| 0.479579131016566     |                            | 0.0171591825270763    | 0.0177854300645608       |
|                       | 100 100                    |                       |                          |
| SP3-regulon           | DZ 3                       |                       |                          |
| 0.0221755186510876    |                            | -0.00625497414908498  | 14460743                 |
| 0.280759424930952     |                            | 2.12107930297903e-144 |                          |
| 4.70614470348473e-144 |                            | 100 100               |                          |
| SP4-regulon           | DZ 3                       |                       |                          |
| 0.00315904505657937   |                            | -0.00562325270179729  | 21685297.5               |
| 0.421026198692322     |                            | 1.31511401820807e-30  |                          |
| 1.86746190585545e-30  |                            | 14.5922746781116      | 29.3953993350071         |
| SPI1-regulon          | DZ 3                       | 0.44987105757585      | 0.0321536032397844       |
| 40890571.5            | 0.793902038051432          |                       | 7.6513066144941e-258     |
| 2.31167136012375e-257 | 100 100                    |                       |                          |
| SPIB-regulon          | DZ 3                       | 0.605002113705772     | 0.0416194465067605       |
|                       | 44053224.5                 | 0.855305842650971     | 0 0 100                  |
|                       | 100                        |                       |                          |
| SREBF1-regulon        | DZ 3                       | 0.0301571211193062    | -0.011056630958378       |
|                       | 17537827 0.340501883136885 |                       | 2.42867054938055e-77     |
| 4.1550749158077e-77   |                            | 93.5622317596567      | 96.9826513763543         |
| SREBF2-regulon        | DZ 3                       |                       |                          |
| 0.0934772714732791    |                            | -0.00565043383477599  | 18076719                 |
| 0.350964624091474     |                            | 9.22063919231034e-68  |                          |
| 1.54038913565655e-67  |                            | 100 100               |                          |
| SRF-regulon           | DZ 3                       | 0.0104927179755997    | -0.0105472521893594      |
|                       | 12159739 0.236084779941838 |                       | 2.52749663165221e-208    |
| 6.18800899473472e-208 |                            | 92.4463519313305      | 98.0796634321775         |
| STAT1-regulon         | DZ 3                       | 0.0582538001121084    | -0.0220816422848253      |
|                       | 3840989.5                  | 0.0745739000538095    | 0 0 100                  |
|                       | 100                        |                       |                          |
| STAT2-regulon         | DZ 3                       | 0.0466402029181027    | -0.0201104754185993      |
|                       | 12740606.5                 | 0.247362487128881     |                          |
| 4.50491016614989e-191 |                            | 1.04868400589063e-190 | 99.3991416309013         |
| 99.9773811947253      |                            |                       |                          |
| STAT5A-regulon        | DZ 3                       |                       |                          |
| 0.0662227010459486    |                            | -0.00552703030166926  | 22564539.5               |
| 0.43809693138532      | 5.02629764570959e-13       |                       | 5.94778554742302e-13 100 |
|                       | 100                        |                       |                          |
| TBP-regulon           | DZ 3                       |                       |                          |
| 0.0195397331035661    |                            | -0.00139740975533029  | 25467299.5               |
| 0.494454839710817     |                            | 0.488819232907473     | 0.492286035977739        |
|                       | 50.0429184549356           | 49.8812512723078      |                          |
| TCF12-regulon         | DZ 3                       |                       |                          |
| 0.0050938472391887    |                            | -0.00405394863436049  | 23576822                 |
| 0.457750683102481     |                            | 1.01770919138871e-10  |                          |
| 1.16544117078384e-10  |                            | 17.6824034334764      | 25.4190133677139         |
| TFDP1-regulon         | DZ 3                       | 0.607661672031014     | 0.0815932239763286       |

|                       |                       |                       |                     |     |     |
|-----------------------|-----------------------|-----------------------|---------------------|-----|-----|
| 47451574              | 0.921285761617402     | 0                     | 0                   | 100 | 100 |
| TFDP2-regulon         | DZ 3                  | 0.0297593835592599    | 0.00270569688974129 |     |     |
| 30584434              | 0.593805456723673     | 6.80416642401186e-28  |                     |     |     |
| 9.47246698244788e-28  | 100                   | 99.9954762389451      |                     |     |     |
| TFEC-regulon          | DZ 3                  | 0.0664392066541368    | -0.0257638081575671 |     |     |
| 8775500.5             | 0.170378830040841     | 0                     | 0                   | 100 |     |
| 100                   |                       |                       |                     |     |     |
| THAP1-regulon         | DZ 3                  |                       |                     |     |     |
| 0.0320234058936334    | -0.00527719579667975  | 16344169.5            |                     |     |     |
| 0.317326684375347     | 7.49364616210956e-101 |                       |                     |     |     |
| 1.43796993921562e-100 | 100                   | 100                   |                     |     |     |
| THAP11-regulon        | DZ 3                  |                       |                     |     |     |
| 0.176737739311898     | -0.00178582043579159  | 22910803              |                     |     |     |
| 0.444819735402692     | 1.19488583103388e-10  |                       |                     |     |     |
| 1.35739030405448e-10  | 100                   | 100                   |                     |     |     |
| TP53-regulon          | DZ 3                  | 0.100269693776923     | 0.00196341093475501 |     |     |
| 28376327              | 0.550934433325635     | 2.77372926870939e-09  |                     |     |     |
| 3.1013350878483e-09   | 100                   | 100                   |                     |     |     |
| USF2-regulon          | DZ 3                  |                       |                     |     |     |
| 0.120343591129504     | -0.00507285634701307  | 19294627              |                     |     |     |
| 0.37461065318547      | 1.70596830200842e-48  | 2.54997367247574e-48  | 100                 |     |     |
| 100                   |                       |                       |                     |     |     |
| XBP1-regulon          | DZ 3                  | 0.173930360225965     | -0.0219223488015727 |     |     |
| 11054086.5            | 0.214618223204506     |                       |                     |     |     |
| 3.12408931089269e-243 | 8.3702015499389e-243  | 100                   | 100                 |     |     |
| YBX1-regulon          | DZ 3                  | 0.10119097184219      | 0.0061655052876327  |     |     |
| 35475500.5            | 0.688766899426793     | 1.46558978926188e-107 |                     |     |     |
| 2.89046875104427e-107 | 100                   | 100                   |                     |     |     |
| YY1-regulon           | DZ 3                  | 0.703064312838044     | 0.0652687134183909  |     |     |
| 45576233.5            | 0.884875494155369     | 0                     | 0                   | 100 |     |
| 100                   |                       |                       |                     |     |     |
| YY2-regulon           | DZ 3                  | 0.031585765112337     | -0.0199279287746308 |     |     |
| 16983183.5            | 0.329733322344283     | 6.0707854531806e-88   |                     |     |     |
| 1.06426115352055e-87  | 83.519313304721       | 90.7149804347334      |                     |     |     |
| ZBTB33-regulon        | DZ 3                  |                       |                     |     |     |
| 0.362199406125476     | -0.00372217203594616  | 21771113.5            |                     |     |     |
| 0.422692340660953     | 1.83967776782285e-19  |                       |                     |     |     |
| 2.39664443147564e-19  | 100                   | 100                   |                     |     |     |
| ZNF143-regulon        | DZ 3                  |                       |                     |     |     |
| 0.0169093447734217    | -0.00659060054933265  | 13976206              |                     |     |     |
| 0.271352001710875     | 7.016236454656e-157   |                       |                     |     |     |
| 1.58143742311294e-156 | 100                   | 99.9932143584176      |                     |     |     |
| ZNF274-regulon        | DZ 3                  | 0.0493604333210905    | -0.0164022138892298 |     |     |
| 8956165.5             | 0.173886492233935     | 0                     | 0                   | 100 |     |
| 100                   |                       |                       |                     |     |     |
| ZNF76-regulon         | DZ 3                  |                       |                     |     |     |
| 0.0127424841462317    | -0.00186243945496316  | 22044211              |                     |     |     |
| 0.427994606045939     | 4.32958029229043e-17  |                       |                     |     |     |
| 5.39298597811614e-17  | 99.5708154506438      | 99.4571486734071      |                     |     |     |
| ATF1-regulon          | GC                    |                       |                     |     |     |

|                       |                      |                       |                       |     |
|-----------------------|----------------------|-----------------------|-----------------------|-----|
| 0.0985494361680518    |                      | -0.00798377736625101  | 25932830              |     |
| 0.34079900010261      | 6.2733935646445e-113 |                       | 1.46036374783528e-112 | 100 |
|                       | 100                  |                       |                       |     |
| ATF3-regulon          | GC                   | 0.0394036682042259    | -0.0120824965284893   |     |
|                       | 20091966.5           | 0.264040680993749     |                       |     |
| 1.21926051639583e-245 |                      | 4.3283748332052e-245  | 100                   | 100 |
| ATF4-regulon          | GC                   | 0.0929541263103047    | -0.0164289534265963   |     |
|                       | 19446482             | 0.255557978867459     | 1.83578952332886e-263 |     |
| 6.86005558717627e-263 |                      | 100                   | 100                   |     |
| ATF5-regulon          | GC                   |                       |                       |     |
| 0.114730504747721     |                      | -0.00385094563313607  | 35989311.5            |     |
| 0.47295730445082      | 0.000124965296336649 |                       | 0.000144268878697595  | 100 |
|                       | 99.9977081041437     |                       |                       |     |
| ATF6-regulon          | GC                   |                       |                       |     |
| 0.129512016128611     |                      | -0.00717780409028504  | 32882853              |     |
| 0.43213345488792      | 6.13230707465809e-22 |                       | 8.13820191216308e-22  | 100 |
|                       | 100                  |                       |                       |     |
| ATF6B-regulon         | GC                   |                       |                       |     |
| 0.0533480312292308    |                      | -0.00410630355958089  | 22270952.5898438      |     |
| 0.292676054790448     |                      | 3.81201735654806e-190 |                       |     |
| 1.12772180131214e-189 |                      | 99.7706422018349      | 99.9266593325999      |     |
| BACH1-regulon         | GC                   | 0.0235749954580695    | -0.0204955759024167   |     |
|                       | 15694374.5           | 0.206249265384298     | 0                     | 0   |
| 99.2545871559633      |                      | 99.5759992665933      |                       |     |
| BATF-regulon          | GC                   |                       |                       |     |
| 0.0110327732140161    |                      | -0.00859076095895571  | 32914821              |     |
| 0.432553565706341     |                      | 3.10432742830336e-24  |                       |     |
| 4.27975237688425e-24  |                      | 43.9220183486239      | 52.0283278327833      |     |
| BATF3-regulon         | GC                   | 0.0656586440739552    | -0.0182046561660772   |     |
|                       | 26301352.5           | 0.345641977113422     |                       |     |
| 2.79581563706204e-106 |                      | 6.40331968488404e-106 | 100                   | 100 |
| BCL11A-regulon        | GC                   | 0.222666611623756     | 0.0188923981810711    |     |
|                       | 55464263             | 0.728889418232725     | 2.88410971435465e-231 |     |
| 9.98886779117952e-231 |                      | 100                   | 100                   |     |
| BHLHE40-regulon       | GC                   | 0.0347326273009331    | -0.021754677348951    |     |
|                       | 11044567.5           | 0.145143339950394     | 0                     | 0   |
|                       | 100                  |                       |                       | 100 |
| BRF2-regulon          | GC                   |                       |                       |     |
| 0.0324887507160043    |                      | -0.00948826032661809  | 25603599              |     |
| 0.336472376452095     |                      | 4.83466596320364e-119 |                       |     |
| 1.16359757080494e-118 |                      | 99.6559633027523      | 99.7318481848185      |     |
| CEBPB-regulon         | GC                   | 0.121473310345662     | -0.0224828250318899   |     |
|                       | 11502232             | 0.151157785885622     | 0                     | 0   |
|                       |                      |                       | 0                     | 100 |
|                       |                      |                       |                       | 100 |
| CEBPG-regulon         | GC                   | 0.055259106435326     | -0.0133133168462666   |     |
|                       | 25842269.5           | 0.339608889811955     |                       |     |
| 1.3560146223017e-114  |                      | 3.20923460611403e-114 | 100                   | 100 |
| CLOCK-regulon         | GC                   |                       |                       |     |
| 0.00840148417154636   |                      | -0.00748076170964913  | 30977293.5            |     |
| 0.407091345244043     |                      | 1.08791105087297e-44  |                       |     |
| 1.73576819352766e-44  |                      | 38.0733944954128      | 51.6134946828016      |     |

|                       |                       |                      |                     |
|-----------------------|-----------------------|----------------------|---------------------|
| CREB1-regulon         | GC                    | 0.049934433274808    | 0.00724156209144833 |
| 48627990              | 0.639049820979804     | 1.3132734387263e-86  |                     |
| 2.6265468774526e-86   | 100                   | 99.9931243124312     |                     |
| CREB3-regulon         | GC                    |                      |                     |
| 0.234125992431642     | -0.00590081547714755  | 36382060             |                     |
| 0.478118649976618     | 0.00190919618596731   | 0.00211801451880749  |                     |
| 100                   | 100                   |                      |                     |
| CREB3L2-regulon       | GC                    |                      |                     |
| 0.118459891259132     | -0.00864976005721702  | 28555118             |                     |
| 0.375260072356624     | 4.57093882422867e-70  |                      |                     |
| 8.54043832947988e-70  | 100                   | 100                  |                     |
| CREB3L4-regulon       | GC                    |                      |                     |
| 0.00685402302125478   | -0.00441708985607851  | 34618931             |                     |
| 0.454948305658165     | 7.81566382631795e-15  |                      |                     |
| 9.99841678682116e-15  | 23.9105504587156      | 31.6442060872754     |                     |
| CREB5-regulon         | GC                    |                      |                     |
| 0.0281167466515633    | 0.0281167466515633    | -0.0114995443372609  |                     |
| 26753437.5            | 0.351583099465336     |                      |                     |
| 2.10756853293285e-98  | 4.53446563146159e-98  | 99.3119266055046     |                     |
| 99.6355885588559      |                       |                      |                     |
| CREM-regulon          | GC                    |                      |                     |
| 0.153221148554264     | 0.153221148554264     | 0.00335035963188063  |                     |
| 43136976              | 0.566889085697561     | 2.34078722013397e-21 |                     |
| 3.07770171536133e-21  | 100                   | 100                  |                     |
| CTCF-regulon          | GC                    |                      |                     |
| 0.391797805482221     | 0.391797805482221     | 0.0217952411237536   |                     |
| 60912951              | 0.800493921955269     | 0                    | 100                 |
|                       |                       | 0                    | 100                 |
| CUX1-regulon          | GC                    |                      |                     |
| 0.106421715368862     | 0.106421715368862     | 0.0309117238682282   |                     |
| 70351815.5            | 0.924535747845618     | 0                    | 100                 |
| 100                   |                       |                      |                     |
| DDIT3-regulon         | GC                    |                      |                     |
| 0.0659984132522742    | 0.0659984132522742    | -0.0196655477828686  |                     |
| 17529351.5            | 0.230363807715825     | 0                    | 100                 |
| 100                   |                       |                      |                     |
| E2F1-regulon          | GC                    |                      |                     |
| 0.49151912016819      | 0.49151912016819      | 0.0559755801736544   |                     |
| 64128130.5            | 0.842746539920621     | 0                    | 100                 |
|                       |                       | 0                    | 100                 |
| E2F2-regulon          | GC                    |                      |                     |
| 0.0518747593518903    | 0.0518747593518903    | -0.0021280217827337  |                     |
| 37386454              | 0.49131799886793      | 0.218100270934528    |                     |
| 0.226060134837248     | 100                   | 100                  |                     |
| E2F3-regulon          | GC                    |                      |                     |
| 0.0165883025842265    | -0.00470794695650761  | 24631602.5           |                     |
| 0.323698782698415     | 4.82708027850596e-138 |                      |                     |
| 1.26934333249601e-137 | 100                   | 100                  |                     |
| E2F4-regulon          | GC                    |                      |                     |
| 0.38909022035839      | 0.38909022035839      | -0.00994971275752898 |                     |
| 37727798.5            | 0.49580381334674      | 0.551673397448067    |                     |
| 0.563580017536875     | 100                   | 100                  |                     |
| E2F6-regulon          | GC                    |                      |                     |
| 0.0568048124377904    | 0.0568048124377904    | -0.0162198056582956  |                     |
| 24607358.5            | 0.323380177634545     |                      |                     |
| 1.55442889998792e-138 | 4.16469629808084e-138 | 100                  | 100                 |
| E2F7-regulon          | GC                    |                      |                     |
| 0.0273185854286948    | -0.00338556398565688  | 30053984             |                     |
| 0.394957576797435     | 3.25045235480627e-50  |                      |                     |
| 5.43016746332342e-50  | 100                   | 100                  |                     |
| E2F8-regulon          | GC                    |                      |                     |
| 0.0770861675216768    | 0.0770861675216768    | 0.00238107181556531  |                     |

|                       |                  |                      |     |                       |
|-----------------------|------------------|----------------------|-----|-----------------------|
|                       | 47891012         | 0.629364747445693    |     | 3.22903971770373e-75  |
| 6.19626540424229e-75  |                  | 100                  | 100 |                       |
| EGR1-regulon          | GC               | 0.0477740748286372   |     |                       |
| 0.000323500230223747  |                  | 38922800.5           |     | 0.511508057222962     |
| 0.102576483259851     |                  | 0.107895263873324    |     | 100 100               |
| EGR2-regulon          | GC               |                      |     |                       |
| 0.037383984162875     |                  | -0.00901022737510709 |     | 26769314              |
| 0.351791742152044     |                  | 3.9339905445836e-98  |     |                       |
| 8.33771130344584e-98  |                  | 100                  |     | 99.9954162082875      |
| EGR3-regulon          | GC               | 0.0303801558082533   |     | -0.0115343011856602   |
|                       | 21888991         | 0.287656466573645    |     | 2.47681009359226e-199 |
| 7.64580507152392e-199 |                  | 100                  |     | 99.9954162082875      |
| ELF1-regulon          | GC               | 0.767161251415614    |     | 0.0625195121674119    |
|                       | 68268269.5       | 0.897154609980302    |     | 0 0 100               |
|                       | 100              |                      |     |                       |
| ELF2-regulon          | GC               | 0.0204106349492354   |     | -0.0127348849225502   |
|                       | 21629171         | 0.284242014845598    |     | 9.99145183087459e-206 |
| 3.1528581332982e-205  |                  | 99.4266055045871     |     | 99.5393289328933      |
| ELF4-regulon          | GC               |                      |     |                       |
| 0.0170310047126887    |                  | -0.00147269952493033 |     | 35373978              |
| 0.464870834847246     |                  | 6.25078838752527e-07 |     |                       |
| 7.45892395822344e-07  |                  | 99.197247706422      |     | 98.3017051705171      |
| ELK1-regulon          | GC               | 0.0666276703818246   |     |                       |
| 0.000595590215732841  |                  | 39417795             |     | 0.518013079260908     |
| 0.0106106232001773    |                  | 0.0114144582910998   |     | 100 100               |
| ELK3-regulon          | GC               | 0.0697160463367214   |     | 0.00500287272650975   |
|                       | 44769427.5       | 0.588342117970398    |     |                       |
| 4.99624692256072e-36  |                  | 7.71159851090894e-36 |     | 100 100               |
| ELK4-regulon          | GC               | 0.0452112276103101   |     |                       |
| 0.000222755747250773  |                  | 38277595             |     | 0.503029021604378     |
| 0.66741946696168      |                  | 0.676954030775418    |     | 96.8463302752293      |
|                       | 96.7248808214155 |                      |     |                       |
| ESRRA-regulon         | GC               | 0.0798060016555008   |     | -0.0124065628028446   |
|                       | 28629116         | 0.37623252481976     |     | 5.24048270819891e-69  |
| 9.54036595595186e-69  |                  | 100                  |     | 100                   |
| ETS1-regulon          | GC               | 0.305192487666072    |     | 0.0647417948338664    |
|                       | 70966476.5       | 0.932613379720044    |     | 0 0 100               |
|                       | 100              |                      |     |                       |
| ETV2-regulon          | GC               |                      |     |                       |
| 0.0240093541011047    |                  | -0.00477624380011414 |     | 27555244              |
| 0.362120123518468     |                  | 3.44946040907735e-85 |     |                       |
| 6.70990928889018e-85  |                  | 100                  |     | 100                   |
| ETV3-regulon          | GC               |                      |     |                       |
| 0.00858165907948748   |                  | -0.00296120879964128 |     | 31721585              |
| 0.416872529903984     |                  | 3.27229027196359e-32 |     |                       |
| 4.84026269394615e-32  |                  | 80.2178899082569     |     | 84.5136596993033      |
| ETV5-regulon          | GC               | 0.0356388091369937   |     | 0.00226210982153971   |
|                       | 43871117.5       | 0.576536883069997    |     |                       |
| 1.84241600105186e-27  |                  | 2.61623072149365e-27 |     | 100 100               |
| ETV6-regulon          | GC               | 0.433012499339347    |     | -0.0276241123376765   |

|                       |                       |                       |                     |     |     |
|-----------------------|-----------------------|-----------------------|---------------------|-----|-----|
| 13866055              | 0.182222213285931     | 0                     | 0                   | 100 | 100 |
| ETV7-regulon          | GC                    | 0.0778705929255131    | 0.0143458892999249  |     |     |
| 59605777              | 0.783315557998843     | 0                     | 0                   | 100 | 100 |
| FLI1-regulon          | GC                    | 0.159046633452398     | 0.0157192791641869  |     |     |
| 51536038.5            | 0.677266244758077     |                       |                     |     |     |
| 1.55016573510439e-139 | 4.23314489201583e-139 |                       | 100                 | 100 |     |
| FOS-regulon           | GC                    |                       |                     |     |     |
| 0.0797841361618993    | -0.00675293351316959  |                       | 28754384            |     |     |
| 0.377878747354858     | 3.11851696749423e-67  |                       |                     |     |     |
| 5.60543556182508e-67  | 100                   | 100                   |                     |     |     |
| FOSB-regulon          | GC                    | 0.0230341915448879    | -0.0191763210440911 |     |     |
| 18223367              | 0.239484285058858     | 5.878878605078e-299   |                     |     |     |
| 2.87862331696923e-298 | 98.4518348623853      | 99.3582691602494      |                     |     |     |
| FOSL1-regulon         | GC                    | 0.0418222250845915    | -0.0197297842604159 |     |     |
| 16123100.5            | 0.211883412992484     |                       | 0                   | 0   | 100 |
| 100                   |                       |                       |                     |     |     |
| FOX01-regulon         | GC                    | 0.0188152923330231    | 0.00220297738647499 |     |     |
| 41168851.5            | 0.541024771556858     |                       | 7.1516365139438e-10 |     |     |
| 8.90817881561421e-10  | 61.2385321100917      | 51.9870737073707      |                     |     |     |
| FOX03-regulon         | GC                    |                       |                     |     |     |
| 0.0119611767983185    | -0.00809381700491925  |                       | 32758855            |     |     |
| 0.430503922190766     | 1.03223683016815e-26  |                       | 1.4512636622166e-26 |     |     |
| 36.6399082568807      | 47.1649248258159      |                       |                     |     |     |
| GABPA-regulon         | GC                    | 0.0282496097041646    | 0.00287206898819245 |     |     |
| 45181869.5            | 0.593762267687969     |                       |                     |     |     |
| 2.29112306117863e-40  | 3.61488305208184e-40  |                       | 100                 | 100 |     |
| GTF2B-regulon         | GC                    |                       |                     |     |     |
| 0.0715335617338276    | -0.00782413489147306  |                       | 29796650            |     |     |
| 0.391575795098623     | 2.20711713552516e-53  |                       |                     |     |     |
| 3.73107896719729e-53  | 100                   | 100                   |                     |     |     |
| HINFP-regulon         | GC                    |                       |                     |     |     |
| 0.0158662528256795    | -0.000378854318008524 |                       | 38255829.5          |     |     |
| 0.502742988007707     | 0.689779540388542     |                       | 0.694671593866475   |     |     |
| 66.0550458715596      | 63.1211037770444      |                       |                     |     |     |
| HIVEP3-regulon        | GC                    |                       |                     |     |     |
| 0.0730387450278824    | -0.00483505492127843  |                       | 34940301.5          |     |     |
| 0.45917162972509      | 6.96527320569315e-09  | 8.60059821920372e-09  |                     |     |     |
| 99.9426605504587      | 99.6837183718372      |                       |                     |     |     |
| HOXB2-regulon         | GC                    | 0.0157675050048806    | -0.0221880024046528 |     |     |
| 21609365              | 0.283981732223299     | 4.21649534122391e-207 |                     |     |     |
| 1.36077804194044e-206 | 66.6857798165138      | 84.4105243857719      |                     |     |     |
| IKZF1-regulon         | GC                    | 0.150986563683643     | 0.00740711889942378 |     |     |
| 50914473              | 0.669097876674135     | 3.74693240979635e-127 |                     |     |     |
| 9.33446319633476e-127 | 100                   | 100                   |                     |     |     |
| IRF1-regulon          | GC                    | 0.117309638845359     | -0.0188575852166362 |     |     |
| 18020872.5            | 0.236823182389913     |                       |                     |     |     |
| 4.73575055087827e-305 | 2.40170206508826e-304 |                       | 100                 | 100 |     |
| IRF2-regulon          | GC                    | 0.0681390401587379    | -0.0175561412875113 |     |     |
| 17423162              | 0.228968307285622     | 0                     | 0                   | 100 | 100 |
| IRF3-regulon          | GC                    | 0.141425412897294     | -0.0041818425902922 |     |     |

|                       |                  |                       |                       |         |
|-----------------------|------------------|-----------------------|-----------------------|---------|
|                       | 31365216.5       | 0.412189275956456     |                       |         |
| 1.28903510146845e-35  |                  | 1.96820413342495e-35  | 100                   | 100     |
| IRF4-regulon          | GC               | 0.0441279310024704    | -0.0148553767713087   |         |
|                       | 19056684         | 0.250435407646269     | 1.57366940830416e-274 |         |
| 6.2072515549775e-274  |                  | 100                   | 99.9954162082875      |         |
| IRF5-regulon          | GC               | 0.0153657090960545    | -0.0329452798036958   |         |
|                       | 18309876.5       | 0.240621158708952     |                       |         |
| 1.40916653308716e-298 |                  | 6.67005492327925e-298 | 51.6628440366973      |         |
| 81.6304547121379      |                  |                       |                       |         |
| IRF7-regulon          | GC               |                       |                       |         |
| 0.103815340516548     |                  | -0.00418001097464955  | 32824370              |         |
| 0.431364894421399     |                  | 2.11061317106083e-22  |                       |         |
| 2.82742519142111e-22  |                  | 100                   | 100                   |         |
| IRF8-regulon          | GC               | 0.122561953452043     | 0.0424193933843997    |         |
|                       | 72479566         | 0.952497803775026     | 0                     | 100 100 |
| IRF9-regulon          | GC               |                       |                       |         |
| 0.0289770405781744    |                  | -0.00513660287947117  | 28891691              |         |
| 0.379683181668702     |                  | 2.58196248555513e-65  |                       |         |
| 4.52640336973862e-65  |                  | 100                   | 100                   |         |
| JUN-regulon           | GC               | 0.0710369975304691    | -0.0180573078648803   |         |
|                       | 13898582.5       | 0.182649676832171     | 0                     | 0 100   |
|                       | 100              |                       |                       |         |
| JUNB-regulon          | GC               | 0.139579320329036     | -0.0210107045646251   |         |
|                       | 16079728.5       | 0.211313435314288     | 0                     | 0 100   |
|                       | 100              |                       |                       |         |
| JUND-regulon          | GC               |                       |                       |         |
| 0.0335692510258475    |                  | -0.00508383078356053  | 28332848.5            |         |
| 0.372339094455126     |                  | 2.68177377825922e-73  |                       |         |
| 5.07749168683745e-73  |                  | 100                   | 100                   |         |
| KLF11-regulon         | GC               | 0.00668552756174421   | -0.0158605513082221   |         |
|                       | 28531993         | 0.374956172748391     | 2.86753366889015e-88  |         |
| 5.81699687117715e-88  |                  | 19.4380733944954      | 41.714796479648       |         |
| KLF12-regulon         | GC               | 0.067881729064028     | 0.0216647772511426    |         |
|                       | 57487256.5       | 0.755474799080634     |                       |         |
| 1.38970771237349e-287 |                  | 6.36575790829146e-287 | 99.9426605504587      |         |
| 98.5492299229923      |                  |                       |                       |         |
| KLF13-regulon         | GC               | 0.0608757276434215    | -0.0056328670596239   |         |
|                       | 29136918         | 0.382905857959649     | 5.84671975009978e-62  |         |
| 1.00028217411346e-61  |                  | 100                   | 100                   |         |
| KLF2-regulon          | GC               | 0.0977317454750389    | -0.0115609603515151   |         |
|                       | 26573483.5       | 0.349218215136689     |                       |         |
| 1.67915645529628e-101 |                  | 3.66831102541648e-101 | 100                   | 100     |
| KLF3-regulon          | GC               | 0.0444731579441697    | -0.0286574932935487   |         |
|                       | 18935592         | 0.248844064452317     | 5.15608538011291e-278 |         |
| 2.09189749707438e-277 |                  | 99.8853211009174      | 99.8624862486249      |         |
| KLF4-regulon          | GC               |                       |                       |         |
| 0.0124695455159058    |                  | -0.00356735531740527  | 35444677              |         |
| 0.465799933156542     |                  | 2.09562250515756e-07  | 2.5218508112913e-07   |         |
|                       | 46.1009174311927 | 49.9610377704437      |                       |         |
| KLF6-regulon          | GC               | 0.0390902163489567    | -0.0315003584735899   |         |

|                       |                       |                       |     |     |
|-----------------------|-----------------------|-----------------------|-----|-----|
| 11276527.5            | 0.148191666572047     | 0                     | 0   | 100 |
| 100                   |                       |                       |     |     |
| KLF7-regulon GC       | 0.0223224423632007    | -0.0246226528301821   |     |     |
| 16232429              | 0.213320164919779     | 0                     |     |     |
| 93.2912844036697      | 97.7264393105977      |                       |     |     |
| KLF8-regulon GC       | 0.0105421740169446    | -0.0151467043947061   |     |     |
| 23440303              | 0.308043195613522     | 4.26953995044052e-165 |     |     |
| 1.18877386855403e-164 | 58.4862385321101      | 78.4011734506784      |     |     |
| MAFB-regulon GC       |                       |                       |     |     |
| 0.0543811269119016    | -0.00145780848187222  | 36754008.5            |     |     |
| 0.483006650125066     | 0.015925735642407     | 0.0170034170016677    |     |     |
| 100                   | 99.9977081041437      |                       |     |     |
| MAFF-regulon GC       |                       |                       |     |     |
| 0.0088726410945011    | -0.00365476858386099  | 36334061.5            |     |     |
| 0.477487872664369     | 6.14999642349561e-05  |                       |     |     |
| 7.15819255849489e-05  | 25.4587155963303      | 28.6693252658599      |     |     |
| MAFG-regulon GC       | 0.0132980940131743    | -0.0125932737582902   |     |     |
| 28917179              | 0.380018134888795     | 8.81097722065353e-70  |     |     |
| 1.62488151341922e-69  | 42.6032110091743      | 59.2409240924092      |     |     |
| MAX-regulon GC        |                       |                       |     |     |
| 0.191531426967319     | -0.00638415423375158  | 24929592.5            |     |     |
| 0.327614849477111     | 4.57242246110124e-132 |                       |     |     |
| 1.15943569549353e-131 | 100                   | 100                   |     |     |
| MAZ-regulon GC        |                       |                       |     |     |
| 0.132871836906671     | -0.00356915457644205  | 34631119              |     |     |
| 0.455108475536009     | 1.91330165667211e-10  |                       |     |     |
| 2.40432597564105e-10  | 100                   | 100                   |     |     |
| MEF2A-regulon GC      | 0.0508738384095479    | 0.0105240072045157    |     |     |
| 52821428.5            | 0.694158331998146     |                       |     |     |
| 5.43098804940968e-167 | 1.54240060603235e-166 | 100                   |     |     |
| 99.9977081041437      |                       |                       |     |     |
| MLX-regulon GC        |                       |                       |     |     |
| 0.0512691930654562    | -0.00172246671500624  | 36959296.5            |     |     |
| 0.485704463866685     | 0.042569371050137     | 0.0451108260382048    |     |     |
| 99.9426605504587      | 99.990832416575       |                       |     |     |
| MXD4-regulon GC       |                       |                       |     |     |
| 0.0880158931614854    | -0.00431924399267161  | 43288146.5            |     |     |
| 0.568875708647891     | 1.40378664356283e-22  |                       |     |     |
| 1.89845431796117e-22  | 93.348623853211       | 88.4144664466447      |     |     |
| MXI1-regulon GC       | 0.0491511486120662    | -0.0167210674000319   |     |     |
| 21268385.5            | 0.279500714430197     |                       |     |     |
| 8.95001284185575e-215 | 2.95558563614771e-214 | 100                   | 100 |     |
| MYBL1-regulon GC      | 0.0698986534224423    | 0.0416075981807706    |     |     |
| 63330639.5            | 0.832266228462487     | 0                     | 0   |     |
| 98.5091743119266      | 79.3225155848918      |                       |     |     |
| MYC-regulon GC        | 0.281127378138613     | -0.035103565966519    |     |     |
| 24681210              | 0.324350704852595     | 4.87415120999705e-137 |     |     |
| 1.25841722149015e-136 | 100                   | 100                   |     |     |
| NFATC1-regulon GC     |                       |                       |     |     |
| 0.0492651902083437    | -0.00130272127290523  | 37591966.5            |     |     |



|                       |                       |                       |
|-----------------------|-----------------------|-----------------------|
| 0.494018762899799     | 0.396140741912029     | 0.407623082257306     |
| 95.4701834862385      | 94.8019801980198      |                       |
| NFE2L1-regulon GC     | 0.121983610070254     | -0.0631090935399632   |
| 19314099              | 0.25381825381506      | 3.39612229436977e-267 |
| 1.3033766643257e-266  | 99.9426605504587      | 99.9358269160249      |
| NFE2L2-regulon GC     | 0.0925498187803862    | -0.0190634004512732   |
| 18787899.5            | 0.246903148003065     |                       |
| 2.70594975357218e-282 | 1.20076520314765e-281 | 100 100               |
| NFKB1-regulon GC      | 0.0362660761773483    | -0.0212182307520452   |
| 20743586              | 0.272604006864754     | 2.75724956953498e-228 |
| 9.32212949699921e-228 | 99.9426605504587      | 99.9312431243124      |
| NFKB2-regulon GC      | 0.0570320587536715    | -0.0169978360666368   |
| 18810774              | 0.247203755639325     | 1.25128852249598e-281 |
| 5.38433243013423e-281 | 100 100               |                       |
| NFYA-regulon GC       |                       |                       |
| 0.013278126829703     | -0.00797686541235505  | 22096899              |
| 0.290388711319526     | 2.7356662283037e-194  |                       |
| 8.2652043493431e-194  | 98.3371559633027      | 99.0442794279428      |
| NFYB-regulon GC       | 0.11956591776749      | 0.0113783409282183    |
| 57221756.5            | 0.751985703038003     | 7.70191972197299e-280 |
| 3.21668411917696e-279 | 100 100               |                       |
| NFYC-regulon GC       | 0.0862052532055902    | 0.00277725668655245   |
| 45873442.5            | 0.60285064666157      | 3.25158712109038e-48  |
| 5.36889966505621e-48  | 100 100               |                       |
| NR1H3-regulon GC      |                       |                       |
| 0.00531869479501389   | -0.00334422686470237  | 35921788              |
| 0.472069937307186     | 4.87060886384926e-08  |                       |
| 5.91133725356064e-08  | 17.3738532110092      | 22.293270993766       |
| NR2C2-regulon GC      |                       |                       |
| 0.015258495313771     | -0.00678858859186915  | 31704652.5            |
| 0.416650009682734     | 1.09441778126647e-32  |                       |
| 1.65326941425361e-32  | 72.1903669724771      | 76.1299046571324      |
| NR3C1-regulon GC      | 0.243725961601728     | 0.0189777759608569    |
| 61819773              | 0.812411018194709     | 0 0 100 100           |
| NRF1-regulon GC       |                       |                       |
| 0.0234880202705743    | -0.00337069643379616  | 31936907.5            |
| 0.419702213077768     | 4.65001518419797e-30  | 6.7377771036338e-30   |
| 100                   | 99.9656215621562      |                       |
| PAX5-regulon GC       | 0.124776131609699     | 0.0254880716764291    |
| 65148315.5            | 0.856153407891439     | 0 0 100               |
| 100                   |                       |                       |
| POU2F1-regulon GC     |                       |                       |
| 0.0021342296622248    | -0.00285550070849957  | 35170720.5            |
| 0.462199705133931     | 1.95348456477282e-15  |                       |
| 2.52177098361583e-15  | 11.4105504587156      | 18.6239457279061      |
| POU6F1-regulon GC     | 0.0319397820480431    |                       |
| 0.000975130763134779  | 39718970.5            | 0.521971008621313     |
| 0.00145442224301473   | 0.00162620439770151   | 69.954128440367       |
| 65.1700586725339      |                       |                       |
| REL-regulon GC        | 0.255602964282134     | -0.008433140559227    |

|                       |                       |                      |                      |
|-----------------------|-----------------------|----------------------|----------------------|
|                       | 30453162              | 0.400203416270526    | 1.69612401446323e-45 |
| 2.76838632245723e-45  | 100                   | 100                  |                      |
| RELA-regulon GC       | 0.0869690933324948    |                      | -0.005299033586577   |
| 27551887.5            | 0.362076013722358     |                      |                      |
| 3.05111504713636e-85  | 6.01747689851893e-85  | 100                  | 100                  |
| RELB-regulon GC       | 0.111548962573668     |                      | 0.00661970837677298  |
| 49586423.5            | 0.651645175149205     |                      |                      |
| 1.20681082979385e-102 | 2.6776115286051e-102  | 100                  | 100                  |
| REST-regulon GC       | 0.224852844309542     |                      | 0.00648356422366794  |
| 49049030              | 0.644582962214417     | 1.75298904794401e-93 |                      |
| 3.60760064939202e-93  | 100                   | 100                  |                      |
| RFX5-regulon GC       | 0.077308384004388     |                      | 0.0124379550380026   |
| 58313026              | 0.766326735406721     | 0                    | 0 100 100            |
| RXRA-regulon GC       |                       |                      |                      |
| 0.00912364691034414   | -0.00562259292527969  |                      | 31113216.5           |
| 0.408877591577009     | 5.75200941124751e-40  |                      |                      |
| 8.97566303733128e-40  | 53.3256880733945      | 64.7002200220022     |                      |
| SETDB1-regulon GC     |                       |                      |                      |
| 0.0573766455480963    | -0.00243444795160461  |                      | 36580921             |
| 0.480732002624957     | 0.00626737586964763   |                      | 0.00679364407244247  |
| 96.8463302752293      | 94.9807480748075      |                      |                      |
| SOX5-regulon GC       |                       |                      |                      |
| 0.00606612075149156   | -0.00180661911843223  |                      | 36756387             |
| 0.483037907431798     | 0.000996661797063218  |                      | 0.00112322202526172  |
| 19.6674311926606      | 22.6072607260726      |                      |                      |
| SP1-regulon GC        |                       |                      |                      |
| 0.00837326244971853   | -0.00480530017931637  |                      | 32258951.5           |
| 0.423934388015445     | 6.52320891165955e-29  |                      |                      |
| 9.35652187328946e-29  | 51.5481651376147      | 60.1530986431977     |                      |
| SP2-regulon GC        |                       |                      |                      |
| 0.0270592292597059    | -0.00122813026026597  |                      | 35091118             |
| 0.461153600547364     | 3.57603323686637e-08  |                      |                      |
| 4.37755792788814e-08  | 100                   | 100                  |                      |
| SP3-regulon GC        |                       |                      |                      |
| 0.0275500341024207    | -0.000748639736558109 |                      | 35995534             |
| 0.473039078085943     | 0.000130997908561719  |                      |                      |
| 0.000150013733998097  | 100                   | 100                  |                      |
| SP4-regulon GC        |                       |                      |                      |
| 0.00540573529705937   | -0.00336138175758937  |                      | 35033879.5           |
| 0.460401394807868     | 2.40130596628664e-12  |                      |                      |
| 3.04451292154199e-12  | 22.3623853211009      | 29.2812614594793     |                      |
| SPI1-regulon GC       | 0.467991529923278     |                      | 0.0514250436851625   |
| 68545448.5            | 0.900797186823996     | 0                    | 0 100                |
| 100                   |                       |                      |                      |
| SPIB-regulon GC       | 0.604008599581292     |                      | 0.0411385142234595   |
| 65116690              | 0.855737798072621     | 0                    | 0 100 100            |
| SREBF1-regulon GC     | 0.0419225995978384    |                      | 0.00103239915981449  |
| 40243035              | 0.528858057107316     | 4.24437934780482e-05 |                      |
| 4.98100716849822e-05  | 97.0756880733945      | 96.8876054272094     |                      |
| SREBF2-regulon GC     | 0.103966344873147     |                      | 0.00518291309871516  |

|                |                       |                       |                       |
|----------------|-----------------------|-----------------------|-----------------------|
|                | 47173615.5            | 0.619937006243629     | 6.4871995985388e-65   |
|                | 1.12339310121038e-64  | 100 100               |                       |
| SRF-regulon    | GC                    |                       |                       |
|                | 0.0141404368707139    | -0.00689369439766841  | 25349851              |
|                | 0.333137720547666     | 7.24937187364127e-124 |                       |
|                | 1.77484621733976e-123 | 96.4449541284404      | 97.9945911257792      |
| STAT1-regulon  | GC                    | 0.0678051239010194    | -0.0124415708381184   |
|                | 16538407.5            | 0.217341213407465     | 0 0 100               |
|                | 100                   |                       |                       |
| STAT2-regulon  | GC                    |                       |                       |
|                | 0.0607201677559597    | -0.00573459259830156  | 32618217.5            |
|                | 0.428655719762534     | 4.47511312868234e-24  |                       |
|                | 6.11025061800858e-24  | 100 99.9610377704437  |                       |
| STAT5A-regulon | GC                    |                       |                       |
|                | 0.0620202521970721    | -0.00997079793806651  | 26868057.5            |
|                | 0.353089390193798     | 1.8709346251458e-96   |                       |
|                | 3.90695171721623e-96  | 100 100               |                       |
| TBP-regulon    | GC                    | 0.0227505136147737    | 0.00192316404894683   |
|                | 39444524              | 0.518364341212409     | 0.00533074335600507   |
|                | 0.00582281197348246   | 54.1284403669725      | 49.7158049138247      |
| TCF12-regulon  | GC                    |                       |                       |
|                | 0.00797280747500268   | -0.00111371065762323  | 37450985              |
|                | 0.492166039759557     | 0.145143408195045     | 0.151546793850709     |
|                | 24.0825688073394      | 25.2658599193253      |                       |
| TFDP1-regulon  | GC                    | 0.559656024713245     | 0.0327515074378071    |
|                | 59094551.5            | 0.776597234575331     | 0 0 100               |
|                | 100                   |                       |                       |
| TFDP2-regulon  | GC                    | 0.0274703100328577    |                       |
|                | 0.000361032381241379  | 40435447.5            | 0.531386666117873     |
|                | 8.49179408296803e-06  | 1.00486229981788e-05  | 100                   |
|                | 99.9954162082875      |                       |                       |
| TFEC-regulon   | GC                    | 0.0735231810797982    | -0.0187385702905068   |
|                | 19734170              | 0.259338660834738     | 1.92619346442335e-255 |
|                | 7.01331979354144e-255 | 100 100               |                       |
| THAP1-regulon  | GC                    |                       |                       |
|                | 0.0347717839946424    | -0.00248899199339078  | 31818945              |
|                | 0.418151996535663     | 3.63831739610522e-31  |                       |
|                | 5.32619660048393e-31  | 100 100               |                       |
| THAP11-regulon | GC                    |                       |                       |
|                | 0.175184342316797     | -0.00342500571453272  | 30507920.5            |
|                | 0.400923030830415     | 7.2098408612742e-45   |                       |
|                | 1.16340613897834e-44  | 100 100               |                       |
| TP53-regulon   | GC                    |                       |                       |
|                | 0.0930149390075797    | -0.00555526658363763  | 33340430.5            |
|                | 0.438146757503541     | 1.72016896030467e-18  |                       |
|                | 2.24095405837856e-18  | 100 100               |                       |
| USF2-regulon   | GC                    | 0.131046333739658     | 0.00599036479465845   |
|                | 47260186              | 0.621074681531609     | 4.07234485916882e-66  |
|                | 7.22841212502465e-66  | 100 100               |                       |
| XBP1-regulon   | GC                    |                       |                       |

|                       |                      |                       |                       |
|-----------------------|----------------------|-----------------------|-----------------------|
| 0.191696407179173     |                      | -0.00373709241651948  | 39627290              |
| 0.520766179733417     |                      | 0.00322108260062438   | 0.00354568782394312   |
| 100                   | 100                  |                       |                       |
| YBX1-regulon          | GC                   |                       |                       |
| 0.0921185024409748    |                      | -0.00318778000728891  | 31701459.5            |
| 0.41660804853899      | 2.74216922647727e-32 | 4.09882137010287e-32  | 100                   |
| 100                   |                      |                       |                       |
| YY1-regulon           | GC                   | 0.663658470259106     | 0.0251539140098695    |
| 53060580              | 0.697301166469858    | 2.24865824638702e-172 |                       |
| 6.51651981606034e-172 | 100                  | 100                   |                       |
| YY2-regulon           | GC                   |                       |                       |
| 0.0416518212008376    |                      | -0.00972397089254216  | 32321730              |
| 0.42475939824487      | 1.29179254726822e-26 | 1.79837785992242e-26  |                       |
| 89.6788990825688      | 90.5642647598093     |                       |                       |
| ZBTB33-regulon        | GC                   | 0.366070106989523     |                       |
| 0.000253849801196304  |                      | 38158059              | 0.501458126747308     |
| 0.836132078097772     |                      | 0.836132078097772     | 100 100               |
| ZNF143-regulon        | GC                   |                       |                       |
| 0.0191116921203667    |                      | -0.00438768169397612  | 26440705.5            |
| 0.347473299150443     |                      | 8.0808798599862e-104  |                       |
| 1.82140466685403e-103 | 100                  | 99.9931243124312      |                       |
| ZNF274-regulon        | GC                   | 0.0523715383925523    | -0.0134884115908986   |
| 17977665.5            |                      | 0.23625537307649      | 2.32831126265795e-306 |
| 1.22451925665715e-305 | 100                  | 100                   |                       |
| ZNF76-regulon         | GC                   | 0.0153474322723595    |                       |
| 0.000821915461766664  |                      | 40031199.5            | 0.526074198709053     |
| 0.000216631306924042  |                      | 0.000246093164665712  | 99.2545871559633      |
| 99.4682801613495      |                      |                       |                       |
| ATF1-regulon          | GC IgA               |                       |                       |
| 0.100135795771469     |                      | -0.00613423125384775  | 5556944               |
| 0.381864936645996     |                      | 2.32758950938674e-13  |                       |
| 4.13147137916146e-13  | 100                  | 100                   |                       |
| ATF3-regulon          | GC IgA               | 0.0410165287352449    | -0.0100769833102241   |
| 4460690               | 0.306531990289524    | 3.47819837256313e-33  |                       |
| 1.02896701854992e-32  | 100                  | 100                   |                       |
| ATF4-regulon          | GC IgA               | 0.0963364360474433    | -0.0125042152415343   |
| 4647677               | 0.319381459153818    | 3.86901532596717e-29  |                       |
| 1.01740773386544e-28  | 100                  | 100                   |                       |
| ATF5-regulon          | GC IgA               | 0.124502661675215     | 0.00611273240132641   |
| 8294268.5             |                      | 0.56996980989504      | 1.42116236592761e-05  |
| 1.99806986100714e-05  | 100                  | 99.9977803919828      |                       |
| ATF6-regulon          | GC IgA               | 0.131109836839473     | -0.0053421356067575   |
| 6924907.5             |                      | 0.475869356208536     | 0.134409094724549     |
| 0.144591601900651     | 100                  | 100                   |                       |
| ATF6B-regulon         | GC IgA               |                       |                       |
| 0.0544749755858022    |                      | -0.00284176436170396  | 4975829.40625         |
| 0.341931605029481     |                      | 1.0558435421776e-22   |                       |
| 2.45786529490524e-22  |                      | 99.3808049535604      | 99.9245333274144      |
| BACH1-regulon         | GC IgA               | 0.0240652872605643    | -0.0193553256596506   |
| 3253184.5             |                      | 0.223554006121033     |                       |

|                        |                      |                      |
|------------------------|----------------------|----------------------|
| 6.36256117120622e-66   | 3.34623587522697e-65 | 99.0712074303406     |
| 99.5671764366413       |                      |                      |
| BATF-regulon GC IgA    |                      |                      |
| 0.0117059667080055     | -0.00764178310385315 | 6395442.5            |
| 0.439485307947248      | 6.74828497896301e-05 |                      |
| 9.12625206678806e-05   | 43.9628482972136     | 51.7723570017535     |
| BATF3-regulon GC IgA   | 0.0707905612034447   | -0.0124617602861201  |
| 5988689                | 0.41153381167375     | 4.06542038129556e-08 |
| 6.34384279279088e-08   | 100                  | 100                  |
| BCL11A-regulon GC IgA  | 0.222153854592353    | 0.0177800868838821   |
| 10433830.5             | 0.716997332141113    |                      |
| 2.63874454428786e-41   | 8.92146964973516e-41 | 100 100              |
| BHLHE40-regulon GC IgA | 0.0368622365698634   | -0.0189236439727088  |
| 2726569                | 0.187365771266714    | 8.63513643918374e-84 |
| 8.75849553117208e-83   | 100                  | 100                  |
| BRF2-regulon GC IgA    | 0.034056133766371    | -0.0076103744762293  |
| 5318075.5              | 0.365450248173479    |                      |
| 7.01525579642386e-17   | 1.46495047513557e-16 | 99.6904024767802     |
| 99.7292078218987       |                      |                      |
| CEBPB-regulon GC IgA   | 0.123358536079352    | -0.0198749610214533  |
| 2810390                | 0.193125825867697    | 8.43821439336232e-81 |
| 7.48891527410906e-80   | 100                  | 100                  |
| CEBPG-regulon GC IgA   |                      |                      |
| 0.0600021057616057     | -0.00811640297443093 | 6169895              |
| 0.423986018805921      | 2.41099989770917e-06 |                      |
| 3.49348964770105e-06   | 100                  | 100                  |
| CLOCK-regulon GC IgA   |                      |                      |
| 0.00717636787717903    | -0.00847871333515244 | 5699296.5            |
| 0.391647188976396      | 8.48773181429921e-13 |                      |
| 1.46982672881767e-12   | 34.3653250773994     | 51.213015781413      |
| CREB1-regulon GC IgA   | 0.0480688154354793   | 0.00513416558490427  |
| 8793749                | 0.604293367859348    | 9.81176366046844e-11 |
| 1.62008190672851e-10   | 100                  | 99.9933411759483     |
| CREB3-regulon GC IgA   |                      |                      |
| 0.236684963792564      | -0.00313738255889021 | 7656119.5            |
| 0.526117158607623      | 0.105195265861387    | 0.115796339165247    |
| 100                    | 100                  |                      |
| CREB3L2-regulon GC IgA |                      |                      |
| 0.118933952915572      | -0.00789948081357236 | 5702213              |
| 0.391847606523833      | 1.95671254734562e-11 |                      |
| 3.26886096144798e-11   | 100                  | 100                  |
| CREB3L4-regulon GC IgA |                      |                      |
| 0.00627149133004565    | -0.00486448011499175 | 6525156.5            |
| 0.44839906133258       | 9.93788830132178e-05 | 0.000131885994279224 |
| 22.2910216718266       | 31.4118926597563     |                      |
| CREB5-regulon GC IgA   | 0.0275188572481153   | -0.01173901733723    |
| 5005104.5              | 0.343943345982808    |                      |
| 3.63316122305572e-22   | 8.32111118828892e-22 | 99.6904024767802     |
| 99.6226666370719       |                      |                      |
| CREM-regulon GC IgA    | 0.162280976724702    | 0.0123694682822461   |

|                       |                      |                       |                      |     |
|-----------------------|----------------------|-----------------------|----------------------|-----|
|                       | 10432777.5           | 0.716924971545381     |                      |     |
| 2.80400703710508e-41  |                      | 9.25974416904467e-41  | 100                  | 100 |
| CTCF-regulon          | GC IgA               | 0.387448212458509     | 0.0167270287809396   |     |
|                       | 10845138.5           | 0.745261806888742     |                      |     |
| 2.82160640789272e-52  |                      | 1.29247777393795e-51  | 100                  | 100 |
| CUX1-regulon          | GC IgA               | 0.108018178887492     | 0.0315446577240111   |     |
|                       | 13381438.5           | 0.919552575126688     |                      |     |
| 2.45810299044538e-149 |                      | 1.74525312321622e-147 | 100                  | 100 |
| DDIT3-regulon         | GC IgA               | 0.0736679828750185    | -0.0113207286897759  |     |
|                       | 5034012.5            | 0.345929860798967     | 1.2038112884162e-21  |     |
|                       | 2.71335242785874e-21 | 100                   | 100                  |     |
| E2F1-regulon          | GC IgA               | 0.491479255011999     | 0.0541699241517675   |     |
|                       | 12144147             | 0.834527741286338     | 1.16666683748652e-95 |     |
| 1.84074101025651e-94  |                      | 100                   | 100                  |     |
| E2F2-regulon          | GC IgA               |                       |                      |     |
|                       | 0.0536721320480051   | -0.000250643974104597 | 7942528              |     |
|                       | 0.545798725257813    | 0.00449559980119561   | 0.00545619804931433  |     |
|                       | 100                  | 100                   |                      |     |
| E2F3-regulon          | GC IgA               |                       |                      |     |
|                       | 0.0165451776716999   | -0.00460288943327068  | 4778855.5            |     |
|                       | 0.328395850803584    | 1.83119670505551e-26  | 4.6433916449622e-26  |     |
|                       | 100                  | 100                   |                      |     |
| E2F4-regulon          | GC IgA               |                       |                      |     |
|                       | 0.391299837939386    | -0.00741043348237092  | 7404843.5            |     |
|                       | 0.508849845166879    | 0.583007623822376     | 0.599906395527372    |     |
|                       | 100                  | 100                   |                      |     |
| E2F6-regulon          | GC IgA               |                       |                      |     |
|                       | 5555012              | 0.0597966421358273    | -0.0126949436464749  |     |
|                       | 3.934312694981e-13   | 0.38173217247605      | 2.18880776692605e-13 |     |
|                       |                      | 100                   | 100                  |     |
| E2F7-regulon          | GC IgA               |                       |                      |     |
|                       | 5999904.5            | 0.0276471857247401    | -0.0029478250236128  |     |
|                       |                      | 0.412304524172734     |                      |     |
| 5.32282300062461e-08  |                      | 8.2156615879206e-08   | 100                  | 100 |
| E2F8-regulon          | GC IgA               |                       |                      |     |
|                       | 9658261.5            | 0.078508550662298     | 0.0037385519908902   |     |
|                       |                      | 0.663701382595896     |                      |     |
| 3.14193299829536e-24  |                      | 7.56194043657527e-24  | 100                  | 100 |
| EGR1-regulon          | GC IgA               |                       |                      |     |
|                       | 0.000747508940104759 | 0.0482051960873074    | 7647366.5            |     |
|                       | 0.113453655165198    | 0.525515665450509     | 0.12392630025737     |     |
|                       |                      | 100                   | 100                  |     |
| EGR2-regulon          | GC IgA               |                       |                      |     |
|                       | 0.0399018396533873   | -0.00619013229070625  | 5827896.5            |     |
|                       | 0.400484389936613    | 6.68217764433554e-10  |                      |     |
| 1.07826048351778e-09  |                      | 100                   | 99.9955607839656     |     |
| EGR3-regulon          | GC IgA               |                       |                      |     |
|                       | 0.0322128652744241   | -0.00932465328825514  | 4744846.5            |     |
|                       | 0.326058802845139    | 3.82051924611579e-27  |                      |     |
| 9.86388605360804e-27  |                      | 100                   | 99.9955607839656     |     |
| ELF1-regulon          | GC IgA               |                       |                      |     |
|                       | 13097858.5           | 0.770984716390965     | 0.064398484043461    |     |
|                       |                      | 0.900065378794662     |                      |     |
| 5.73178446156821e-136 |                      | 1.62782678708537e-134 | 100                  | 100 |
| ELF2-regulon          | GC IgA               |                       |                      |     |
|                       |                      | 0.0194686597756224    | -0.0132819471382277  |     |

|                      |                      |                       |                      |
|----------------------|----------------------|-----------------------|----------------------|
|                      | 4034612              | 0.277252543083244     | 1.9821196643735e-43  |
| 7.03652480852594e-43 |                      | 98.7616099071207      | 99.5405411404346     |
| ELF4-regulon         | GC IgA               |                       |                      |
| 0.0171788468608671   |                      | -0.00127734757632158  | 6910595              |
| 0.474885822470253    |                      | 0.11924362729399      | 0.129256450959898    |
| 99.0712074303406     | 98.3308547710474     |                       |                      |
| ELK1-regulon         | GC IgA               | 0.0675934245089185    | 0.00154948286604377  |
|                      | 7834174.5            | 0.538352833700714     | 0.0173497441356447   |
|                      | 0.0203608567542277   | 100                   | 100                  |
| ELK3-regulon         | GC IgA               | 0.0717174936579628    | 0.00686087533464415  |
|                      | 9037854.5            | 0.621067935192119     | 5.8932930844467e-14  |
|                      | 1.07288156152748e-13 | 100                   | 100                  |
| ELK4-regulon         | GC IgA               |                       |                      |
| 0.0404884939621782   |                      | -0.00454086261189238  | 6522096              |
| 0.448188748319059    |                      | 0.00130827457477948   | 0.00164402645680253  |
|                      | 95.9752321981424     | 96.7349566066633      |                      |
| ESRRA-regulon        | GC IgA               |                       |                      |
| 0.0828150957820609   |                      | -0.00898458466976501  | 6329647              |
| 0.434963938928757    |                      | 5.47184003459783e-05  | 7.5437017952708e-05  |
|                      | 100                  | 100                   |                      |
| ETS1-regulon         | GC IgA               | 0.300785151086187     | 0.0582608635949304   |
|                      | 13245922.5           | 0.910240116920429     |                      |
| 7.2069833713152e-143 |                      | 3.41130546242253e-141 | 100                  |
| ETV2-regulon         | GC IgA               | 0.0230756396034937    | -0.0055660066705919  |
|                      | 4930883.5            | 0.338842989120691     |                      |
| 1.56526475790503e-23 |                      | 3.7044599270419e-23   | 100                  |
| ETV3-regulon         | GC IgA               |                       |                      |
| 0.0081859634150173   |                      | -0.00326634294757168  | 5977101.5            |
| 0.410737535887385    |                      | 2.88906501583035e-08  |                      |
| 4.55830258053233e-08 |                      | 78.328173374613       | 84.3917164228797     |
| ETV5-regulon         | GC IgA               | 0.0373616218253227    | 0.00392592556054069  |
|                      | 9144809.5            | 0.628417723906738     |                      |
| 1.63397440744649e-15 |                      | 3.26794881489298e-15  | 100                  |
| ETV6-regulon         | GC IgA               | 0.430585627797673     | -0.0291971010275124  |
|                      | 2612440.5            | 0.179523030288579     |                      |
| 5.97413645457018e-88 |                      | 7.06939480457472e-87  | 100                  |
| ETV7-regulon         | GC IgA               | 0.0799291142880545    | 0.0159666905040952   |
|                      | 11769813.5           | 0.8088040992518       | 8.52330788495905e-82 |
| 8.0687314644279e-81  |                      | 100                   | 100                  |
| FLI1-regulon         | GC IgA               | 0.159988440807136     | 0.016172042683515    |
|                      | 9954865.5            | 0.684083568860315     |                      |
| 3.33776086916132e-30 |                      | 9.29337340040994e-30  | 100                  |
| FOS-regulon          | GC IgA               |                       |                      |
| 0.0821165973907679   |                      | -0.00419075831410726  | 6231950              |
| 0.428250346221056    |                      | 8.54800710195376e-06  |                      |
| 1.21381700847743e-05 |                      | 100                   | 100                  |
| FOSB-regulon         | GC IgA               | 0.0237829829896494    | -0.0178173280180739  |
|                      | 3754382              | 0.257995553774677     | 6.06156766735582e-51 |
| 2.60831093565008e-50 |                      | 98.1424148606811      | 99.3318979868155     |
| FOSL1-regulon        | GC IgA               | 0.0439935203852778    | -0.0169206323948799  |

|                       |                      |                       |                      |                     |  |
|-----------------------|----------------------|-----------------------|----------------------|---------------------|--|
| 3882830.5             |                      | 0.266822343879953     |                      |                     |  |
| 2.01187136322617e-47  |                      | 8.16244953080333e-47  | 100                  | 100                 |  |
| FOX01-regulon         | GC IgA               | 0.0195965682957369    |                      | 0.00292037128295072 |  |
| 7975340.5             |                      | 0.5480535515137       | 0.0015954995909253   |                     |  |
| 0.00198737668343326   |                      | 60.9907120743034      | 52.2806472376978     |                     |  |
| FOX03-regulon         | GC IgA               |                       |                      |                     |  |
| 0.0102824980517333    |                      | -0.00952924667311141  | 6175780              |                     |  |
| 0.424390427263548     |                      | 3.5769627961103e-07   |                      |                     |  |
| 5.40349698986875e-07  |                      | 37.1517027863777      | 46.8292899473953     |                     |  |
| GABPA-regulon         | GC IgA               | 0.0264580688118478    |                      |                     |  |
| 0.000977097075955991  |                      | 7698359               | 0.529019794299373    |                     |  |
| 0.071823226267901     |                      | 0.0809436359527139    | 100                  | 100                 |  |
| GTF2B-regulon         | GC IgA               |                       |                      |                     |  |
| 0.0725707404429984    |                      | -0.00653274215873349  | 5910761              |                     |  |
| 0.40617871527851      | 5.87811643319789e-09 | 9.37856779229327e-09  |                      | 100                 |  |
| 100                   |                      |                       |                      |                     |  |
| HINFP-regulon         | GC IgA               | 0.0139786374352648    |                      | -0.002268053349584  |  |
| 6807277.5             |                      | 0.467785997352001     |                      | 0.0403664627105097  |  |
| 0.0462261105233257    |                      | 59.4427244582043      | 63.2610480989057     |                     |  |
| HIVEP3-regulon        | GC IgA               | 0.0819425270585242    |                      | 0.00428506197361292 |  |
| 7894466.5             |                      | 0.542496010374846     |                      | 0.00838322991296524 |  |
| 0.00992015539700886   |                      | 100                   | 99.6914744856059     |                     |  |
| HOXB2-regulon         | GC IgA               | 0.0162596636349412    |                      | -0.0209924917524289 |  |
| 4310486               | 0.296210194542802    | 8.73929068652577e-37  |                      |                     |  |
| 2.75773172774813e-36  |                      | 67.4922600619195      | 83.8456928506426     |                     |  |
| IKZF1-regulon         | GC IgA               | 0.14802271668237      | 0.00418839789336758  |                     |  |
| 8757405               | 0.601795862169626    | 2.70352633879491e-10  |                      |                     |  |
| 4.41265218515952e-10  |                      | 100                   | 100                  |                     |  |
| IRF1-regulon          | GC IgA               | 0.114921733341629     |                      | -0.0206678302956414 |  |
| 3092574               | 0.212517091153529    | 3.85137306211543e-71  |                      |                     |  |
| 2.4858862491836e-70   |                      | 100                   | 100                  |                     |  |
| IRF2-regulon          | GC IgA               | 0.0655571191794102    |                      | -0.0196028411651758 |  |
| 2960597.5             |                      | 0.20344786212922      | 1.39946335582696e-75 |                     |  |
| 9.93618982637142e-75  |                      | 100                   | 100                  |                     |  |
| IRF3-regulon          | GC IgA               | 0.145846453974942     |                      | 0.00040279235655219 |  |
| 7471925               | 0.513459586194973    | 0.403739383833419     |                      |                     |  |
| 0.421551415473128     |                      | 100                   | 100                  |                     |  |
| IRF4-regulon          | GC IgA               | 0.0449401861577442    |                      | -0.0135687503464816 |  |
| 3975200               | 0.273169838701841    | 5.69491601499359e-45  |                      |                     |  |
| 2.12810019507655e-44  |                      | 100                   | 99.9955607839656     |                     |  |
| IRF5-regulon          | GC IgA               | 0.0129192892802467    |                      | -0.0343701239419562 |  |
| 3254817               | 0.223666189095897    | 2.37548999760196e-66  |                      |                     |  |
| 1.2973829986903e-65   |                      | 44.2724458204334      | 80.7382416265287     |                     |  |
| IRF7-regulon          | GC IgA               |                       |                      |                     |  |
| 0.104020416848523     |                      | -0.00384162420274352  | 6344060.5            |                     |  |
| 0.435954413237        | 7.09559711754922e-05 | 9.50542255369801e-05  |                      | 100                 |  |
| 100                   |                      |                       |                      |                     |  |
| IRF8-regulon          | GC IgA               | 0.12449778849456      | 0.0430311726863328   |                     |  |
| 13810728              | 0.949052711842172    | 8.88010946495592e-171 |                      |                     |  |
| 1.26097554402374e-168 |                      | 100                   | 100                  |                     |  |



|                       |                      |                       |     |                      |
|-----------------------|----------------------|-----------------------|-----|----------------------|
| IRF9-regulon          | GC IgA               |                       |     |                      |
| 0.026529893324485     |                      | -0.00743928285842231  |     | 4598924.5            |
| 0.316031259777356     |                      | 3.62274531199296e-30  |     |                      |
| 9.89288142890385e-30  |                      | 100                   | 100 |                      |
| JUN-regulon           | GC IgA               |                       |     |                      |
| 2624746               | 0.180368645968329    | 0.0701125621287226    |     | -0.0184188319878833  |
| 1.85391240104141e-86  |                      | 100                   | 100 | 1.69724374743228e-87 |
| JUNB-regulon          | GC IgA               |                       |     |                      |
| 3069633               | 0.210940619713184    | 0.13856970194258      |     | -0.0213648703852694  |
| 4.50605378207676e-71  |                      | 100                   | 100 | 6.66388235377548e-72 |
| JUND-regulon          | GC IgA               |                       |     |                      |
| 0.0325950458223893    |                      | -0.00590467316406083  |     | 5087310.5            |
| 0.34959242018293      | 1.05360565433921e-20 |                       |     | 2.33768754556512e-20 |
| 100                   |                      |                       |     | 100                  |
| KLF11-regulon         | GC IgA               |                       |     |                      |
| 5650467.5             |                      | 0.00710624974898678   |     | -0.0149365610439267  |
| 7.18467512444376e-15  |                      | 0.388291732633577     |     |                      |
| 40.993940470113       |                      | 1.39756694201509e-14  |     | 21.9814241486068     |
| KLF12-regulon         | GC IgA               |                       |     |                      |
| 11605196.5            |                      | 0.0729699454331223    |     | 0.0261061520206395   |
| 3.5598067011796e-75   |                      | 0.797491863556091     |     | 4.7631216424234e-76  |
|                       |                      | 100                   |     | 98.5927685170799     |
| KLF13-regulon         | GC IgA               |                       |     |                      |
| 0.0605386955053201    |                      | -0.00579465131831392  |     | 5464494              |
| 0.375511909983694     |                      | 1.13980480659313e-14  |     |                      |
| 2.15803043381633e-14  |                      | 100                   | 100 |                      |
| KLF2-regulon          | GC IgA               |                       |     |                      |
| 4801901.5             |                      | 0.0957844760879672    |     | -0.0131575503909856  |
| 5.23364960196363e-26  |                      | 0.329979537687948     |     |                      |
| KLF3-regulon          | GC IgA               |                       |     |                      |
| 3135947               | 0.215497619281426    | 1.30382147978743e-25  |     | 100                  |
| 6.12100551785786e-69  |                      | 0.0402944070883117    |     | 100                  |
| KLF4-regulon          | GC IgA               |                       |     |                      |
| 7020362.5             |                      | 0.0402944070883117    |     | -0.0319623276190161  |
| 0.256152555025911     |                      | 99.6904024767802      |     | 99.8646039109493     |
|                       |                      | 1.0345361438633e-69   |     |                      |
| KLF6-regulon          | GC IgA               |                       |     |                      |
| 2228309               | 0.153126084249311    | 0.0137113419221679    |     | -0.0022041394241999  |
| 1.86368917770685e-101 |                      | 0.482428882006806     |     | 0.243525316397873    |
| KLF7-regulon          | GC IgA               |                       |     |                      |
| 3173472               | 0.21807628153673     | 0.256152555025911     |     | 49.8146627305618     |
| 9.83150929081091e-68  |                      | 49.5356037151703      |     | 49.8146627305618     |
| KLF8-regulon          | GC IgA               |                       |     |                      |
| 4407818.5             |                      | 0.0384202987894396    |     | -0.0311815377466611  |
| 2.87137328510714e-34  |                      | 0.0384202987894396    |     | -0.0311815377466611  |
| MAFB-regulon          | GC IgA               |                       |     |                      |
| 0.0531164210985506    |                      | 1.04996573391935e-102 |     |                      |
| 0.455716655423172     |                      | 100                   | 100 |                      |
| 100                   |                      | 99.9977803919828      |     |                      |
| MAFF-regulon          | GC IgA               |                       |     |                      |
| 0.00655271103008841   |                      | 0.0221441262952655    |     | -0.0240256333248648  |
| 0.455641717883148     |                      | 0.0221441262952655    |     | -0.0240256333248648  |
|                       |                      | 93.4984520123839      |     | 97.5850664772601     |
|                       |                      | 0.00966833877050595   |     | -0.0155490678599032  |
|                       |                      | 0.30289873935198      |     | 9.50384115493208e-35 |
|                       |                      | 59.4427244582043      |     | 77.7661864914656     |
|                       |                      | -0.00268560119565091  |     | 6631643              |
|                       |                      | 0.00601229491942056   |     | 0.00717433511393042  |
|                       |                      | 100                   |     |                      |
|                       |                      | 99.9977803919828      |     |                      |
|                       |                      | -0.00587605729815579  |     | 6630552.5            |
|                       |                      | 0.000554945948495646  |     |                      |

|                       |                      |                       |                      |
|-----------------------|----------------------|-----------------------|----------------------|
| 0.000722957107214511  |                      | 21.3622291021672      | 28.5974296939161     |
| MAFG-regulon          | GC IgA               | 0.0140465218844671    | -0.0114422803705399  |
| 5700392               | 0.391722470108992    |                       | 3.19777524388943e-12 |
| 5.40576291228927e-12  |                      | 44.5820433436532      | 58.7019732315273     |
| MAX-regulon           | GC IgA               | 0.19038869429279      | -0.00733371929430823 |
| 4491268.5             | 0.308633299384097    |                       | 1.66643908339937e-32 |
| 4.82927244576961e-32  | 100                  | 100                   |                      |
| MAZ-regulon           | GC IgA               |                       |                      |
| 0.133267671063713     |                      | -0.00305790916852136  | 6770695.5            |
| 0.465272136655837     | 100                  | 0.0312138127565604    | 0.036035458629525    |
| 100                   | 100                  |                       |                      |
| MEF2A-regulon         | GC IgA               | 0.0469204539363036    | 0.00621034578140185  |
| 9095474.5             |                      | 0.6250274959956       | 8.76071859455959e-15 |
| 1.68111086544252e-14  | 100                  | 99.9977803919828      |                      |
| MLX-regulon           | GC IgA               |                       |                      |
| 0.0518128588163732    |                      | -0.00112057555757757  | 7235289.5            |
| 0.497198346165256     | 100                  | 0.862024136639712     | 0.868137782998859    |
| 100                   | 99.9889019599139     |                       |                      |
| MXD4-regulon          | GC IgA               |                       |                      |
| 0.0852596499386107    |                      | -0.00695901596718113  | 8030050              |
| 0.551813107080831     | 96.5944272445821     | 0.00129719967792836   | 0.00164402645680253  |
| 88.5468226311233      |                      |                       |                      |
| MXI1-regulon          | GC IgA               | 0.0469620754834901    | -0.0183984417259775  |
| 3725063               | 0.255980795649074    |                       | 9.13569123799129e-52 |
| 4.05396298685864e-51  | 100                  | 100                   |                      |
| MYBL1-regulon         | GC IgA               | 0.0741742447121461    | 0.0446015127557539   |
| 12397419.5            |                      | 0.851932251241211     |                      |
| 1.70674078738332e-106 | 79.9236454842075     | 4.03928653014051e-105 | 99.0712074303406     |
| 0.284430362324914     |                      |                       |                      |
| MYC-regulon           | GC IgA               | 0.284430362324914     | -0.0306697130005455  |
| 5145810.5             |                      | 0.353612453279141     |                      |
| 1.07453599603886e-19  | 2.31188047632603e-19 |                       | 100                  |
| 100                   | 100                  |                       |                      |
| NFATC1-regulon        | GC IgA               |                       |                      |
| 0.0442165836321719    |                      | -0.00634643434576557  | 6504920              |
| 0.447008439114606     | 94.7368421052632     | 0.00101063238641603   | 0.0012928810709106   |
| 94.8283133198677      |                      |                       |                      |
| NFE2L1-regulon        | GC IgA               | 0.129402710323609     | -0.0536463027154565  |
| 4316960               | 0.296655078205449    |                       | 1.75728688563568e-36 |
| 5.42466821217971e-36  | 100                  | 99.9356313675005      |                      |
| NFE2L2-regulon        | GC IgA               | 0.0938504541778775    | -0.0171521687055998  |
| 3999926.5             |                      | 0.274869007049764     |                      |
| 2.51461821546433e-44  | 9.15578939989578e-44 |                       | 100                  |
| 100                   | 100                  |                       |                      |
| NFKB1-regulon         | GC IgA               | 0.0374295725974377    | -0.0193771564738256  |
| 4259341.5             |                      | 0.292695620479739     |                      |
| 7.54812908206207e-38  | 2.4359871128473e-37  |                       | 100                  |
| 99.931192151466       |                      |                       |                      |
| NFKB2-regulon         | GC IgA               | 0.0563362645706944    | -0.0171624961735348  |
| 3604406               | 0.247689425849253    |                       | 3.21684031122775e-55 |
| 1.52263774731447e-54  | 100                  | 100                   |                      |
| NFYA-regulon          | GC IgA               |                       |                      |

|                       |                       |                      |
|-----------------------|-----------------------|----------------------|
| 0.0122178399491299    | -0.00879315848366938  | 3945122              |
| 0.271102923223759     | 9.21302864584712e-46  |                      |
| 3.63402796586192e-45  | 95.6656346749226      | 99.0411293365592     |
| NFYB-regulon GC IgA   | 0.120262559311752     | 0.0117210968879422   |
| 11115500.5            | 0.763840681896568     |                      |
| 3.27316386513815e-60  | 1.60272161672282e-59  | 100 100              |
| NFYC-regulon GC IgA   | 0.0872283734736143    | 0.00372011562003682  |
| 9155761.5             | 0.629170329077161     |                      |
| 1.11887169193193e-15  | 2.26971114649048e-15  | 100 100              |
| NR1H3-regulon GC IgA  |                       |                      |
| 0.0053520384019669    | -0.00320516518437383  | 6739110.5            |
| 0.463101662376455     | 0.00162125209576149   | 0.00200189389215767  |
| 14.8606811145511      | 22.1561272279315      |                      |
| NR2C2-regulon GC IgA  |                       |                      |
| 0.015373046339851     | -0.00645909995074758  | 6114032              |
| 0.420147196432355     | 6.08973405863564e-07  | 9.1025498560659e-07  |
| 70.5882352941177      | 76.017135373893       |                      |
| NR3C1-regulon GC IgA  | 0.246401581081594     | 0.0210740068417757   |
| 12138806              | 0.834160715700579     | 1.87288814984142e-95 |
| 2.65950117277481e-94  | 100 100               |                      |
| NRF1-regulon GC IgA   |                       |                      |
| 0.0236628013905351    | -0.00308834836082069  | 6134604              |
| 0.421560873711932     | 1.1390322209627e-06   |                      |
| 1.66744923068766e-06  | 99.6904024767802      | 99.9689254877589     |
| PAX5-regulon GC IgA   | 0.123760512560315     | 0.0236612614787281   |
| 12097756              | 0.831339820681785     | 6.99766400427904e-94 |
| 9.03334807825112e-93  | 100 100               |                      |
| POU2F1-regulon GC IgA |                       |                      |
| 0.00196802226487165   | -0.00293283541108361  | 6643352              |
| 0.456521280509045     | 6.44298640434614e-05  |                      |
| 8.79715451362646e-05  | 9.90712074303406      | 18.4072092868399     |
| POU6F1-regulon GC IgA |                       |                      |
| 0.0303129552674957    | -0.000694115520320962 | 7379712              |
| 0.507122845820598     | 0.651739070441125     | 0.665805381313955    |
| 68.7306501547988      | 65.3297227709587      |                      |
| REL-regulon GC IgA    |                       |                      |
| 0.254241904281009     | -0.00953797188847061  | 5473877.5            |
| 0.376156730164177     | 1.55893482411366e-14  |                      |
| 2.91274664505447e-14  | 100 100               |                      |
| RELA-regulon GC IgA   |                       |                      |
| 0.0850365156993805    | -0.00707833165670926  | 4581605.5            |
| 0.314841123825334     | 1.5458480439719e-30   |                      |
| 4.39020844488018e-30  | 100 100               |                      |
| RELB-regulon GC IgA   | 0.110450480887947     | 0.00530456153694712  |
| 9066411.5             | 0.6230303298097       | 2.30838387224383e-14 |
| 4.25701960855355e-14  | 100 100               |                      |
| REST-regulon GC IgA   | 0.223863022236646     | 0.00528215008606181  |
| 8957952.5             | 0.615577188449325     |                      |
| 7.51000880389453e-13  | 1.31656944463336e-12  | 100 100              |
| RFX5-regulon GC IgA   | 0.0804406251778126    | 0.0152003513573668   |

|                       |                     |                       |                       |     |
|-----------------------|---------------------|-----------------------|-----------------------|-----|
|                       | 11621669.5          | 0.798623863644875     |                       |     |
| 1.29587433153977e-76  |                     | 1.08243620634498e-75  | 100                   | 100 |
| RXRA-regulon          | GC IgA              | 0.00738170211854422   | -0.007199686178246    |     |
|                       | 5469125.5           | 0.375830179783439     |                       |     |
| 3.14801205772017e-15  |                     | 6.20857933605923e-15  | 46.4396284829721      |     |
| 64.3908285796728      |                     |                       |                       |     |
| SETDB1-regulon        | GC IgA              | 0.0585361836629925    | -0.0011898126988854   |     |
|                       | 7239917             | 0.497516341090944     | 0.877545977692294     |     |
| 0.877545977692294     |                     | 97.2136222910217      | 95.0369564734868      |     |
| SOX5-regulon          | GC IgA              |                       |                       |     |
| 0.00601723402917066   |                     | -0.00179887442095905  | 7054255               |     |
| 0.484757924258316     |                     | 0.195864626678777     | 0.207558037226763     |     |
|                       | 19.8142414860681    | 22.5134841187046      |                       |     |
| SP1-regulon           | GC IgA              |                       |                       |     |
| 0.00800688203454129   |                     | -0.00502274510338967  | 6162171.5             |     |
| 0.423455271359449     |                     | 9.09171532576818e-07  |                       |     |
| 1.34481622526988e-06  |                     | 52.3219814241486      | 59.8761458726389      |     |
| SP2-regulon           | GC IgA              |                       |                       |     |
| 0.0272949305833515    |                     | -0.000952003113093052 | 6745261               |     |
| 0.463524315599673     |                     | 0.0236503549152862    | 0.0275274622784479    |     |
|                       | 100                 | 100                   |                       |     |
| SP3-regulon           | GC IgA              | 0.0264793771005087    | -0.0018033600671268   |     |
|                       | 6298145.5           | 0.432799202645333     |                       |     |
| 3.06220400649167e-05  |                     | 4.26306832276291e-05  | 100                   | 100 |
| SP4-regulon           | GC IgA              | 0.00525463227449797   | -0.0034075479901202   |     |
|                       | 6744428.5           | 0.463467107436381     | 0.00468740369981878   |     |
|                       | 0.00564077394384972 | 22.9102167182663      | 29.0591081614987      |     |
| SPI1-regulon          | GC IgA              | 0.471237213206883     | 0.0530720180842084    |     |
|                       | 13178477            | 0.90560536235307      | 1.05312580125262e-139 |     |
| 3.73859659444679e-138 |                     | 100                   | 100                   |     |
| SPIB-regulon          | GC IgA              | 0.604757804325571     | 0.0405955556139305    |     |
|                       | 12384402.5          | 0.851037742338418     |                       |     |
| 3.86920840413366e-105 |                     | 7.848965619814e-104   | 100                   | 100 |
| SREBF1-regulon        | GC IgA              | 0.0420404387538209    | 0.00111852062421793   |     |
|                       | 7721010             | 0.530576337370523     | 0.0578509424570826    |     |
| 0.0657186706312459    |                     | 96.9040247678019      | 96.8947683839034      |     |
| SREBF2-regulon        | GC IgA              | 0.109627789852606     | 0.0107214745235847    |     |
|                       | 10689207            | 0.734546425850421     | 5.83568067469486e-48  |     |
| 2.43725487001962e-47  |                     | 100                   | 100                   |     |
| SRF-regulon           | GC IgA              |                       |                       |     |
| 0.0139251166671818    |                     | -0.00689312683982291  | 4838683.5             |     |
| 0.332507142087005     |                     | 2.74081470278316e-25  |                       |     |
| 6.71027047922775e-25  |                     | 96.9040247678019      | 97.9424233680332      |     |
| STAT1-regulon         | GC IgA              | 0.066557520402032     | -0.0133057038416718   |     |
|                       | 2932558             | 0.201521029342874     | 1.53133456106208e-76  |     |
| 1.20805282039342e-75  |                     | 100                   | 100                   |     |
| STAT2-regulon         | GC IgA              |                       |                       |     |
| 0.0603999186929685    |                     | -0.00587626497084281  | 6221297               |     |
| 0.427518287886458     |                     | 6.91164265574093e-06  |                       |     |
| 9.91366926379001e-06  |                     | 100                   | 99.9622666637072      |     |

|                      |        |                      |                      |
|----------------------|--------|----------------------|----------------------|
| STAT5A-regulon       | GC IgA |                      |                      |
| 0.0618464086384306   |        | -0.00983140259140643 | 5141882.5            |
| 0.353342526954322    |        | 9.21166496923115e-20 | 2.0123945009705e-19  |
| 100                  | 100    |                      |                      |
| TBP-regulon          | GC IgA |                      |                      |
| 7572577              |        | 0.0224453829016061   | 0.00155518794626231  |
| 0.188318548938752    |        | 0.520376242112918    | 0.176382866259535    |
|                      |        | 54.7987616099071     | 49.8501764588374     |
| TCF12-regulon        | GC IgA |                      |                      |
| 0.00643147081377833  |        | -0.00263097054032213 | 6974836              |
| 0.479300368558009    |        | 0.0922892431436646   | 0.102383379112503    |
| 21.9814241486068     |        | 25.2436019798904     |                      |
| TFDP1-regulon        | GC IgA |                      |                      |
| 11416632             |        | 0.562142221709896    | 0.0342225256352835   |
| 6.12100551785786e-69 |        | 0.784533991235228    | 9.99242092389966e-70 |
| 100                  | 100    |                      |                      |
| TFDP2-regulon        | GC IgA |                      |                      |
| 0.0260961290974675   |        | -0.00103438770483516 | 7143430.5            |
| 0.490885932145002    |        | 0.571809974210361    | 0.592678951371323    |
| 100                  |        | 99.9955607839656     |                      |
| TFEC-regulon         | GC IgA |                      |                      |
| 4084548              |        | 0.0744439044212331   | -0.0172202196651597  |
| 1.29109716026958e-41 |        | 0.280684070821576    | 3.72781574444034e-42 |
| 100                  | 100    |                      |                      |
| THAP1-regulon        | GC IgA |                      |                      |
| 0.0346587533118928   |        | -0.00252432865549623 | 6022768              |
| 0.413875669928208    |        | 9.15675416397506e-08 |                      |
| 1.39812805514458e-07 |        | 100                  | 100                  |
| THAP11-regulon       | GC IgA |                      |                      |
| 0.173434054545058    |        | -0.00507981504598848 | 5206232              |
| 0.357764529000897    |        | 1.10880719187932e-18 |                      |
| 2.35000927234124e-18 |        | 100                  | 100                  |
| TP53-regulon         | GC IgA |                      |                      |
| 0.0936956182575227   |        | -0.00469449070942808 | 6585365              |
| 0.452536500010754    |        | 0.00323592150499357  | 0.00396121425611282  |
| 100                  | 100    |                      |                      |
| USF2-regulon         | GC IgA |                      |                      |
| 10590553             |        | 0.136351818089212    | 0.0111449460538902   |
| 9.59154905558105e-45 |        | 0.727767069524377    | 2.49920644405985e-45 |
| 100                  | 100    |                      |                      |
| XBP1-regulon         | GC IgA |                      |                      |
| 0.193165229511701    |        | -0.00213986935735175 | 8054300.5            |
| 0.553479565415868    |        | 0.000907958454447972 | 0.00117209182301466  |
| 100                  | 100    |                      |                      |
| YBX1-regulon         | GC IgA |                      |                      |
| 0.0936468194262508   |        | -0.00154796141775562 | 6859924              |
| 0.47140378662379     |        | 0.0760697410220217   | 0.0850543561033629   |
| 100                  |        |                      | 100                  |
| YY1-regulon          | GC IgA |                      |                      |
| 9930365.5            |        | 0.662646057621229    | 0.0233408727548067   |
| 1.10406553201068e-29 |        | 0.682399965255919    |                      |
| YY2-regulon          | GC IgA |                      |                      |
| 5358136              |        | 2.95806236878334e-29 | 100                  |
| 5.86702772788519e-16 |        | 0.0352918752780998   | -0.0158228132238375  |
|                      |        | 0.36820314622221     | 2.8508796705921e-16  |
|                      |        | 85.4489164086687     | 90.5666659267973     |

|                 |         |                       |                                       |                       |
|-----------------|---------|-----------------------|---------------------------------------|-----------------------|
| ZBTB33-regulon  | GC IgA  | 0.361735389694494     | -0.00411995111210073                  | 6407533.5             |
|                 |         | 0.440316183505646     | 0.000213505756810976                  |                       |
|                 |         | 0.000280720532103321  | 100 100                               |                       |
| ZNF143-regulon  | GC IgA  | 5603625.5             | 0.0201490219186016                    | -0.0032045246875205   |
|                 |         | 1.00741285696981e-12  | 0.385072819979001                     |                       |
|                 |         | 99.9933411759483      | 1.72352561071943e-12                  | 100                   |
| ZNF274-regulon  | GC IgA  | 3253923               | 0.0514454344320656                    | -0.0139957221016388   |
|                 |         | 3.40633874988935e-65  | 0.223604754743965                     | 6.71672429555646e-66  |
|                 |         |                       | 100 100                               |                       |
| ZNF76-regulon   | GC IgA  | 8.96647568768491e-05  | 0.0146461331464729                    |                       |
|                 |         | 0.84819733795579      | 7231156 0.496914298185714             |                       |
|                 |         |                       | 0.86031444278373 99.3808049535604     | 99.4606352518145      |
| ATF1-regulon    | GC LM02 | 14516251.5            | 0.09760007663517                      | -0.00882405627287154  |
|                 |         | 5.32910942971389e-84  | 0.321774618340929                     | 2.10162062016886e-84  |
|                 |         |                       | 100 100                               |                       |
| ATF3-regulon    | GC LM02 | 13113657              | 0.0403738713268834                    | -0.010892029839206    |
|                 |         | 3.6125359864609e-115  | 0.290683994847351                     | 1.09393695364661e-115 |
|                 |         |                       | 100 100                               |                       |
| ATF4-regulon    | GC LM02 | 12888928.5            | 0.0942282176687774                    | -0.0148563972683602   |
|                 |         | 3.64825249621825e-121 | 0.285702548547813                     |                       |
|                 |         |                       | 1.26354110844632e-120                 | 100 100               |
| ATF5-regulon    | GC LM02 | 24453496              | 0.121242399138479                     | 0.00287335737978862   |
|                 |         | 5.17559282242956e-06  | 0.54204863717754 4.37374041332076e-06 |                       |
|                 |         |                       | 100 99.997745666043                   |                       |
| ATF6-regulon    | GC LM02 | 0.000758244441396189  | 0.137155195634148                     |                       |
|                 |         | 9.30756673365628e-15  | 25756841.5 0.570939256827446          |                       |
|                 |         |                       | 1.30858859027643e-14                  | 100 100               |
| ATF6B-regulon   | GC LM02 | 0.0535259697213253    | -0.00385698730571815                  | 14973569.2128906      |
|                 |         | 0.331911755502401     | 2.70111259799466e-75                  |                       |
|                 |         | 6.39263314858736e-75  | 99.4100294985251 99.932369981289      |                       |
| BACH1-regulon   | GC LM02 | 10678134.5            | 0.025210522798456                     | -0.0184866493648834   |
|                 |         | 6.90818006456673e-182 | 0.236696963629392                     |                       |
|                 |         | 99.585202551906       | 3.63319099692028e-181                 | 98.6234021632252      |
| BATF-regulon    | GC LM02 | 21551425              | 0.0147608567876183                    | -0.004636411143745    |
|                 |         | 0.0109422449750379    | 0.477719854473322                     | 0.00978637402697048   |
|                 |         |                       | 50.4424778761062 51.7459816497216     |                       |
| BATF3-regulon   | GC LM02 | 18749305              | 0.0710043440516161                    | -0.0124380413366384   |
|                 |         | 4.67605227461564e-20  | 0.415606636502038                     | 3.0295549948214e-20   |
|                 |         |                       | 100 100                               |                       |
| BCL11A-regulon  | GC LM02 | 29935401.5            | 0.218541786699304                     | 0.0143633774806592    |
|                 |         | 2.19792405786322e-71  | 0.663563344334793                     |                       |
|                 |         |                       | 4.95405105105679e-71                  | 100 100               |
| BHLHE40-regulon | GC LM02 | 9081987.5             | 0.0381100356105423                    | -0.0179432990516605   |
|                 |         | 1.87872190260892e-233 | 0.201315956918326                     |                       |
|                 |         |                       | 1.48210283428037e-232                 | 100 100               |
| BRF2-regulon    | GC LM02 |                       |                                       |                       |

|                         |                       |                      |     |
|-------------------------|-----------------------|----------------------|-----|
| 0.0350785166720309      | -0.00668361673054707  | 17386457             |     |
| 0.385397054155197       | 5.98430125553259e-36  |                      |     |
| 1.04909972627855e-35    | 99.9016715830875      | 99.724971257242      |     |
| CEBPB-regulon GC LM02   | 0.123311337620291     | -0.0202341868882947  |     |
| 8428561.5               | 0.186831783661612     |                      |     |
| 1.97187995509168e-256   | 1.75004346014386e-255 | 100                  | 100 |
| CEBPG-regulon GC LM02   |                       |                      |     |
| 0.0583759993849718      | -0.00990677215792012  | 17771890             |     |
| 0.393940758187261       | 4.94567527310983e-31  |                      |     |
| 8.16611498583251e-31    | 100                   | 100                  |     |
| CLOCK-regulon GC LM02   |                       |                      |     |
| 0.00752047646213164     | -0.00825936564705727  | 17932686             |     |
| 0.397505044155353       | 1.00599473422823e-32  |                      |     |
| 1.70061014595724e-32    | 36.3815142576205      | 51.4303748957371     |     |
| CREB1-regulon GC LM02   | 0.0491254991903914    | 0.00629539989989825  |     |
| 28134078                | 0.623634290906569     | 1.48075486737506e-41 |     |
| 2.76667356799024e-41    | 100                   | 99.9932369981289     |     |
| CREB3-regulon GC LM02   | 0.243685590050746     | 0.00397465949786044  |     |
| 27709848                | 0.614230592827986     | 9.98049376684667e-36 |     |
| 1.72832940840516e-35    | 100                   | 100                  |     |
| CREB3L2-regulon GC LM02 |                       |                      |     |
| 0.125581585859321       | -0.00122302839645405  | 23382670.5           |     |
| 0.518312174181412       | 0.0454834892604822    | 0.048929208143852    |     |
| 100                     | 100                   |                      |     |
| CREB3L4-regulon GC LM02 |                       |                      |     |
| 0.00666997204126869     | -0.00453296877450498  | 20652709.5           |     |
| 0.457798469327193       | 2.08755866109067e-08  |                      |     |
| 2.69484845340796e-08    | 24.4837758112094      | 31.5043170495277     |     |
| CREB5-regulon GC LM02   | 0.0277177058066056    | -0.011719267699997   |     |
| 15537458.5              | 0.344411212414274     |                      |     |
| 9.05588105631814e-65    | 1.91930613432414e-64  | 99.6066863323501     |     |
| 99.6235262291756        |                       |                      |     |
| CREM-regulon GC LM02    | 0.172059741708094     | 0.0225659481594807   |     |
| 38500686                | 0.853425799595297     | 0                    | 100 |
|                         |                       | 0                    | 100 |
| CTCF-regulon GC LM02    | 0.381635388443419     | 0.0110426322766279   |     |
| 30845495                | 0.6837369400194       | 1.38415269399917e-89 |     |
| 3.70848457637514e-89    | 100                   | 100                  |     |
| CUX1-regulon GC LM02    | 0.105858953748294     | 0.0298294475647242   |     |
| 41116126.5              | 0.911400984764892     | 0                    | 100 |
| 100                     |                       | 0                    |     |
| DDIT3-regulon GC LM02   |                       |                      |     |
| 0.0752821300272596      | -0.00984668834915983  | 16661972.5           |     |
| 0.369337762024483       | 3.28714647150106e-46  |                      |     |
| 6.39417532812534e-46    | 100                   | 100                  |     |
| E2F1-regulon GC LM02    | 0.477401836735614     | 0.0406172515408446   |     |
| 35719628                | 0.791779452634859     | 7.0096820500685e-223 |     |
| 4.97687425554864e-222   | 100                   | 100                  |     |
| E2F2-regulon GC LM02    |                       |                      |     |
| 0.0524307200706666      | -0.00152443862235499  | 22955752.5           |     |
| 0.508848892526856       | 0.3337822417862       | 0.343457089374206    | 100 |

100

|                       |                   |                       |                       |                     |
|-----------------------|-------------------|-----------------------|-----------------------|---------------------|
| E2F3-regulon          | GC LM02           |                       |                       |                     |
| 0.0164825310922512    |                   | -0.00473898484695796  |                       | 14450314.5          |
| 0.320313025242356     |                   | 9.20056096090556e-86  |                       |                     |
| 2.37541755717926e-85  |                   | 100                   | 100                   |                     |
| E2F4-regulon          | GC LM02           | 0.38722422961289      | -0.0116954183616473   |                     |
| 21184845              | 0.469594055633903 |                       | 0.000896622529256829  |                     |
| 0.00101856319323576   |                   | 100                   | 100                   |                     |
| E2F6-regulon          | GC LM02           | 0.0603115461522054    |                       | -0.0123668480231173 |
| 17815903.5            |                   | 0.394916383827555     |                       |                     |
| 1.70544756873486e-30  |                   | 2.78360407770517e-30  | 100                   | 100                 |
| E2F7-regulon          | GC LM02           |                       |                       |                     |
| 0.0270569308818937    |                   | -0.00359773134060343  |                       | 17638471            |
| 0.390983324733836     |                   | 1.0830049346452e-32   |                       |                     |
| 1.80925530258374e-32  |                   | 100                   | 100                   |                     |
| E2F8-regulon          | GC LM02           | 0.0749746308186783    |                       |                     |
| 0.000182101400425766  |                   | 26169019.5            | 0.58007580414054      |                     |
| 2.20424584791031e-18  |                   | 3.36562269250821e-18  | 100                   | 100                 |
| EGR1-regulon          | GC LM02           | 0.0555117417286169    |                       | 0.00823326349328438 |
| 32757530.5            |                   | 0.726120091983032     |                       |                     |
| 1.12146773032043e-134 |                   | 4.30401128933788e-134 | 100                   | 100                 |
| EGR2-regulon          | GC LM02           | 0.0496014366963987    |                       | 0.00363499820398333 |
| 25084359              | 0.556032667493522 |                       | 9.34605346011766e-10  |                     |
| 1.24031737508103e-09  |                   | 100                   | 99.9954913320859      |                     |
| EGR3-regulon          | GC LM02           |                       |                       |                     |
| 0.0410635963167681    |                   | -0.000416890209841432 |                       | 22058672.5          |
| 0.488963760706064     |                   | 0.228034381034781     |                       | 0.236356803700284   |
| 100                   | 99.9954913320859  |                       |                       |                     |
| ELF1-regulon          | GC LM02           | 0.766876008659559     |                       | 0.0612030969947427  |
| 40339737.5            |                   | 0.894191151072007     | 0                     | 0 100               |
| 100                   |                   |                       |                       |                     |
| ELF2-regulon          | GC LM02           | 0.0200753787335096    |                       | -0.0128691152863113 |
| 12768375              | 0.283030298314882 |                       | 3.72514876576632e-124 |                     |
| 1.35633621727902e-123 |                   | 99.4100294985251      | 99.5378615388084      |                     |
| ELF4-regulon          | GC LM02           |                       |                       |                     |
| 0.0176760070891273    |                   | -0.000788773368166192 |                       | 21764391            |
| 0.482440567211703     |                   | 0.0551184479503139    |                       | 0.0584091015592879  |
| 99.3117010816126      |                   | 98.3137582001398      |                       |                     |
| ELK1-regulon          | GC LM02           | 0.0675035113923368    |                       | 0.00148175012930545 |
| 24175936.5            |                   | 0.535896112045319     |                       |                     |
| 8.82663985869917e-05  |                   | 0.000102736299994695  | 100                   | 100                 |
| ELK3-regulon          | GC LM02           | 0.0745176153229987    |                       | 0.00983253313024177 |
| 29945822.5            |                   | 0.663794341524235     |                       |                     |
| 1.39798611591625e-71  |                   | 3.20183916871142e-71  | 100                   | 100                 |
| ELK4-regulon          | GC LM02           |                       |                       |                     |
| 0.0400061295636517    |                   | -0.00510532812284149  |                       | 20259097.5          |
| 0.449073465418683     |                   | 2.65825304025298e-08  |                       |                     |
| 3.40064803347678e-08  |                   | 96.5585054080629      | 96.73347009626        |                     |
| ESRRA-regulon         | GC LM02           |                       |                       |                     |
| 0.0823186297229144    |                   | -0.00963299752083575  |                       | 18977347.5          |



|                       |         |                       |                       |                       |
|-----------------------|---------|-----------------------|-----------------------|-----------------------|
| 0.420661542612132     |         | 4.48423024756698e-18  |                       |                       |
| 6.70274415952117e-18  |         | 100                   | 100                   |                       |
| ETS1-regulon          | GC LM02 | 0.297727807069742     |                       | 0.0560449208830714    |
| 40772106.5            |         | 0.903775262366679     |                       | 0 0 100               |
| 100                   |         |                       |                       |                       |
| ETV2-regulon          | GC LM02 |                       |                       |                       |
| 0.0246069232276469    |         | -0.00408669656215426  |                       | 17228548.5            |
| 0.381896773981608     |         | 4.50771600455564e-38  |                       |                       |
| 8.10247686894812e-38  |         | 100                   | 100                   |                       |
| ETV3-regulon          | GC LM02 | 0.00875300954207445   |                       | -0.0027373985832774   |
| 19068922.5            |         | 0.422691440666362     |                       |                       |
| 2.66687288341854e-17  |         | 3.94474947338992e-17  |                       | 81.2192723697148      |
| 84.4202980229491      |         |                       |                       |                       |
| ETV5-regulon          | GC LM02 | 0.0426388994108642    |                       | 0.00938561446381948   |
| 35110323              |         | 0.778273287918147     |                       | 6.48551244094894e-203 |
| 4.00409898528152e-202 |         | 100                   | 100                   |                       |
| ETV6-regulon          | GC LM02 | 0.425738680585403     |                       | -0.0346119630581505   |
| 6619872.5             |         | 0.146739462811946     |                       | 0 0 100               |
| 100                   |         |                       |                       |                       |
| ETV7-regulon          | GC LM02 | 0.0884900196600399    |                       | 0.0249736682395954    |
| 40311900              |         | 0.893574090879982     | 0                     | 0 100 100             |
| FLI1-regulon          | GC LM02 | 0.164097687322568     |                       | 0.0206285130166297    |
| 33464205.5            |         | 0.741784609673159     |                       |                       |
| 1.07867100007607e-153 |         | 4.94100909712264e-153 |                       | 100 100               |
| FOS-regulon           | GC LM02 | 0.0900314691191925    |                       | 0.00384000958595826   |
| 26613313.5            |         | 0.589924251054067     |                       |                       |
| 9.05104618297207e-23  |         | 1.4440995033506e-22   |                       | 100 100               |
| FOSB-regulon          | GC LM02 | 0.0277556745446962    |                       | -0.0140323097273716   |
| 14098477              |         | 0.312514016160671     |                       | 3.36499287697998e-93  |
| 9.18901901021455e-93  |         | 98.4267453294002      | 99.3439888185036      |                       |
| FOSL1-regulon         | GC LM02 | 0.0459530249152167    |                       | -0.0151809277426456   |
| 13450060              |         | 0.29814087494713      | 9.94762340718154e-108 |                       |
| 3.13902783071062e-107 |         | 100                   | 100                   |                       |
| FOX01-regulon         | GC LM02 | 0.0193484463409232    |                       | 0.00271225017672072   |
| 24473406.5            |         | 0.542489983453366     |                       |                       |
| 8.89715072173965e-07  |         | 1.08913396766123e-06  |                       | 60.7669616519174      |
| 52.1495074280304      |         |                       |                       |                       |
| FOX03-regulon         | GC LM02 |                       |                       |                       |
| 0.0174207971073357    |         | -0.00237637666351076  |                       | 22276683              |
| 0.493796292398685     |         | 0.462123811813039     |                       | 0.468725580553225     |
| 47.6892822025565      |         | 46.7391059311526      |                       |                       |
| GABPA-regulon         | GC LM02 | 0.0260190897046156    |                       |                       |
| 0.000543340440345257  |         | 23521222.5            | 0.521383388325117     |                       |
| 0.0195115580682405    |         | 0.0214778391138772    |                       | 100 100               |
| GTF2B-regulon         | GC LM02 |                       |                       |                       |
| 0.0758660885937696    |         | -0.00326404821542468  |                       | 20604551              |
| 0.456730963507432     |         | 2.28893812165105e-06  |                       |                       |
| 2.75448485825804e-06  |         | 100                   | 100                   |                       |
| HINFP-regulon         | GC LM02 |                       |                       |                       |
| 0.0147581964078022    |         | -0.00150610562954419  |                       | 21905162.5            |

0.485560979921953            0.10570087988112   0.111181666245327  
62.8318584070796   63.2430848305868  
HIVEP3-regulon    GC LM02   0.104374429458476            0.0272982912238191  
                         33447571.5            0.741415891963805  
3.12669466169722e-153    1.38747075612814e-152    100  
99.6866475799725  
HOXB2-regulon    GC LM02   0.0187647837163147            -0.0187583670080429  
                         14659571   0.324951511315903            7.82422633283157e-82  
1.91558644700359e-81    72.5663716814159   83.9852115692419  
IKZF1-regulon    GC LM02   0.14889839568131            0.00514092874848859  
                         28033904   0.621413783042146            3.87171818925061e-40  
7.04851260094341e-40    100            100  
IRF1-regulon    GC LM02   0.121171271664457            -0.0145983612654226  
                         13327908   0.295433191549692            1.38375373292103e-110  
4.46575068351787e-110    100            100  
IRF2-regulon    GC LM02   0.0698413716668099            -0.0155270534084722  
                         11803302.5            0.261638010136434  
1.97862771614786e-149    8.51409502099987e-149    100            100  
IRF3-regulon    GC LM02   0.148797513768423            0.00342781156538072  
                         26164652   0.579978991912837            2.4205539247643e-18  
3.65658146081416e-18    100            100  
IRF4-regulon    GC LM02  
0.0508071480101109            -0.00777956329824939            17065710.5  
0.378287224002304            2.50335805059379e-40  
4.61658237901712e-40    100            99.9954913320859  
IRF5-regulon    GC LM02   0.0127830655996316            -0.0350471940235024  
                         9924465   0.219990741935885            5.94992263572927e-207  
3.84040461033435e-206    45.3294001966568   81.2845194887171  
IRF7-regulon    GC LM02   0.111512256200636            0.00376187486722571  
                         25981467.5            0.575918431059819            1.1114643797193e-16  
                         1.62709218474372e-16    100            100  
IRF8-regulon    GC LM02   0.123623940795929            0.0428105166902839  
                         42474729   0.941516459198118            0            0            100            100  
IRF9-regulon    GC LM02  
0.028147093005099            -0.00590139448393695            16223812  
0.359625273393409            4.63784448508536e-53  
9.40819881260174e-53    100            100  
JUN-regulon    GC LM02   0.0727627738434575            -0.0159960240488356  
                         9623020.5            0.21330876973814   3.00952878734549e-215  
2.03501470382409e-214    100            100  
JUNB-regulon    GC LM02   0.143350812085881            -0.0168084008116757  
                         12122262   0.26870822873789   8.15974917095086e-141  
3.21856772854173e-140    100            100  
JUND-regulon    GC LM02  
0.0341649532146134            -0.00439115224037666            17562717  
0.389304123017209            1.18112621039901e-33            2.0207219503212e-33  
                         100            100  
KLF11-regulon    GC LM02   0.00655190026736678            -0.0157373035187903  
                         171110942   0.37928984845046   1.37074457413398e-49  
2.74148914826795e-49    20.353982300885    41.3287044342749

|                       |                       |                      |                     |
|-----------------------|-----------------------|----------------------|---------------------|
| KLF12-regulon         | GC LM02               | 0.0801716511114696   | 0.0338814009298352  |
| 38760476              | 0.859184436947288     | 0                    | 0 100               |
| 98.5707522712415      |                       |                      |                     |
| KLF13-regulon         | GC LM02               |                      |                     |
| 0.0635214216994063    | -0.00283419919432673  |                      | 20412863.5          |
| 0.452481920829077     | 2.10084944046159e-07  |                      |                     |
| 2.61684754864514e-07  | 100 100               |                      |                     |
| KLF2-regulon          | GC LM02               | 0.0960276319453406   | -0.0131146706999909 |
| 14939621.5            | 0.331159253221841     |                      |                     |
| 6.07817657412694e-76  | 1.46288317546784e-75  | 100                  | 100                 |
| KLF3-regulon          | GC LM02               | 0.0393584402446586   | -0.0334198060758163 |
| 9120250.5             | 0.202164114049082     |                      |                     |
| 3.85291217071915e-232 | 2.87954488548484e-231 |                      | 99.3117010816126    |
| 99.8760116323632      |                       |                      |                     |
| KLF4-regulon          | GC LM02               | 0.0171917526553403   | 0.00132158127888259 |
| 23333150              | 0.517214477576504     | 0.0442512290859626   |                     |
| 0.047966981146616     | 52.9006882989184      | 49.7418787619198     |                     |
| KLF6-regulon          | GC LM02               | 0.0392735434065387   | -0.0307965687313698 |
| 7038335.5             | 0.156015326633595     | 0                    | 0 100               |
| 100                   |                       |                      |                     |
| KLF7-regulon          | GC LM02               | 0.0248022326674809   | -0.0216824685732204 |
| 11151353.5            | 0.247186576813393     |                      |                     |
| 7.58198676571737e-168 | 3.58880706910622e-167 |                      | 94.3952802359882    |
| 97.6284406772019      |                       |                      |                     |
| KLF8-regulon          | GC LM02               | 0.0092438316627107   | -0.0162265738365504 |
| 13142901.5            | 0.291332243317424     |                      |                     |
| 2.90933605688483e-116 | 9.83632666851539e-116 |                      | 56.6371681415929    |
| 78.1171802790865      |                       |                      |                     |
| MAFB-regulon          | GC LM02               |                      |                     |
| 0.0542667253544368    | -0.00155094084069908  |                      | 21491765            |
| 0.476397400551232     | 0.00993723974698045   |                      | 0.0110241253443064  |
| 100                   | 99.997745666043       |                      |                     |
| MAFF-regulon          | GC LM02               |                      |                     |
| 0.00846922120899032   | -0.00400753947509998  |                      | 21337948            |
| 0.472987814648884     | 0.000213910311250819  |                      |                     |
| 0.000244961808045293  | 24.385447394297       | 28.6413129240966     |                     |
| MAFG-regulon          | GC LM02               |                      |                     |
| 0.0176894275154879    | -0.00789487075048431  |                      | 19419153.5          |
| 0.43045483925147      | 3.25233519807904e-15  | 4.61831598127223e-15 |                     |
| 51.4257620452311      | 58.7659775919205      |                      |                     |
| MAX-regulon           | GC LM02               | 0.187024586818481    | -0.0108896908433622 |
| 11074183.5            | 0.245475987320136     |                      |                     |
| 4.27608439653886e-170 | 2.09380684244316e-169 | 100                  | 100                 |
| MAZ-regulon           | GC LM02               |                      |                     |
| 0.131254455165593     | -0.00516512244104914  |                      | 18736239.5          |
| 0.415317019979761     | 2.25459727871092e-20  |                      | 3.5181627865599e-20 |
| 100                   | 100                   |                      |                     |
| MEF2A-regulon         | GC LM02               | 0.0490805140841151   | 0.00851709005515435 |
| 29866845.5            | 0.662043697149363     |                      |                     |
| 4.24516256309668e-70  | 9.41895443687075e-70  |                      | 100                 |

99.997745666043  
 MLX-regulon GC LM02  
 0.051921919811932 -0.00102654565840226 22183424  
 0.491729065943436 0.366315845976909 0.374221943372094  
 100 99.9887283302148  
 MXD4-regulon GC LM02 0.0962012991639772 0.00412461346921295  
 25101762 0.556418431248234 6.96432623869834e-10  
 9.32956911221852e-10 94.1986234021632 88.4758448116504  
 MXI1-regulon GC LM02 0.0457441721708173 -0.0199321124415858  
 10636772.5 0.235780112487496  
 3.84498388908887e-183 2.09995273942546e-182 100 100  
 MYBL1-regulon GC LM02 0.0759973771609955 0.047164237520773  
 38929138.5 0.862923095757789 0 0  
 99.1150442477876 79.6230753623842  
 MYC-regulon GC LM02 0.283646763358627 -0.0319511072501136  
 15446249.5 0.342389427302307  
 2.04615049292413e-66 4.47005184608041e-66 100 100  
 NFATC1-regulon GC LM02 0.0601124801621753 0.00981461021135867  
 26468486 0.586713930983643 2.74461624838576e-21  
 4.33039452523087e-21 97.6401179941003 94.7631822178137  
 NFE2L1-regulon GC LM02 0.134087871880066 -0.049693027017148  
 14445318.5 0.320202281363798 7.2512896268208e-86  
 1.9068206055714e-85 100 99.9346243152461  
 NFE2L2-regulon GC LM02 0.0957629053687166 -0.0154642185679991  
 13599698 0.301457827008707 2.78939099697582e-104  
 8.61072872979492e-104 100 100  
 NFKB1-regulon GC LM02 0.041497853290657 -0.0155187611506063  
 15533987.5 0.344334272461817 7.846643890039e-65  
 1.68821732179627e-64 99.9016715830875 99.932369981289  
 NFKB2-regulon GC LM02 0.0617016391154155 -0.0119426205452106  
 14537307 0.322241345269466 5.6768903361182e-84  
 1.41424285566453e-83 100 100  
 NFYA-regulon GC LM02  
 0.0135707360720142 -0.00754681473190917 13737288.5  
 0.304507728054087 3.67629326982557e-101  
 1.11070988152177e-100 98.2300884955752 99.0351450663901  
 NFYB-regulon GC LM02 0.119537818391017 0.0111631176102522  
 34197037 0.758028925653817 9.35852506171676e-175  
 4.74610913844207e-174 100 100  
 NFYC-regulon GC LM02 0.0898006749006348 0.00640959260988752  
 31044770.5 0.688154182167429  
 7.50291921780315e-94 2.13082905785609e-93 100 100  
 NR1H3-regulon GC LM02  
 0.00574841346295159 -0.00284984765852144 21402103.5  
 0.474409918111818 0.000118603889451274  
 0.000136924815464073 17.6007866273353 22.2074438107261  
 NR2C2-regulon GC LM02  
 0.0176502536272551 -0.00423073721697476 20355479  
 0.451209906798032 8.03037513264297e-08  
 1.00912678657991e-07 74.1396263520157 76.0206496990464

|                |         |                               |                                         |
|----------------|---------|-------------------------------|-----------------------------------------|
| NR3C1-regulon  | GC LM02 | 0.245436528500378             | 0.0204165333825655                      |
|                |         | 36556908 0.810339027222313    | 7.39106412630616e-252                   |
|                |         | 6.17371238785574e-251         | 100 100                                 |
| NRF1-regulon   | GC LM02 |                               |                                         |
|                |         | 0.0236962255643267            | -0.00310247533510866 19252450.5         |
|                |         | 0.426759615715195             | 1.24704930963802e-15                    |
|                |         | 1.80694899967958e-15          | 100 99.9661849906445                    |
| PAX5-regulon   | GC LM02 | 0.125840963217374             | 0.0261595920200148                      |
|                |         | 38516350 0.853773015791 0 0   | 100 100                                 |
| POU2F1-regulon | GC LM02 |                               |                                         |
|                |         | 0.00209255625705391           | -0.00285133071859798 20907191           |
|                |         | 0.463439435766589             | 3.29356275033818e-09                    |
|                |         | 4.33042509766686e-09          | 11.6027531956736 18.5013187853649       |
| POU6F1-regulon | GC LM02 | 0.0346773826615945            | 0.00375951376040052                     |
|                |         | 24311869.5                    | 0.538909272102165                       |
|                |         | 1.41764238946031e-05          | 1.6636794983749e-05 72.4680432645035    |
|                |         | 65.1908293694628              |                                         |
| REL-regulon    | GC LM02 | 0.252298082125985             | -0.0116755815414598                     |
|                |         | 15778603.5                    | 0.349756555207475                       |
|                |         | 1.61098483159887e-60          | 3.36411538363294e-60 100 100            |
| RELA-regulon   | GC LM02 |                               |                                         |
|                |         | 0.0847483649568798            | -0.00748382975769142 14085555           |
|                |         | 0.312227580532423             | 1.76968990436558e-93                    |
|                |         | 4.92737189058652e-93          | 100 100                                 |
| RELB-regulon   | GC LM02 | 0.110790987420588             | 0.0057358649958113                      |
|                |         | 28427391 0.630136016137041    | 7.48316833948737e-46                    |
|                |         | 1.43595933000974e-45          | 100 100                                 |
| REST-regulon   | GC LM02 | 0.223217474897985             | 0.00470444220537672                     |
|                |         | 27255554 0.604160480825272    | 5.44525461947278e-30                    |
|                |         | 8.78666086324016e-30          | 100 100                                 |
| RFX5-regulon   | GC LM02 | 0.088415771959057             | 0.0235961516276109                      |
|                |         | 40108377 0.88906269648532 0 0 | 100 100                                 |
| RXRA-regulon   | GC LM02 |                               |                                         |
|                |         | 0.0111386846883405            | -0.00346920851014316 20250793.5         |
|                |         | 0.448889394728622             | 1.10019538911805e-08                    |
|                |         | 1.43328206655746e-08          | 58.7020648967552 64.3905408147163       |
| SETDB1-regulon | GC LM02 |                               |                                         |
|                |         | 0.0554192897316084            | -0.00439678104901747 20617645           |
|                |         | 0.457021211775213             | 2.67037850292931e-06                    |
|                |         | 3.18650207912573e-06          | 95.771878072763 95.0359566266147        |
| SOX5-regulon   | GC LM02 |                               |                                         |
|                |         | 0.00566886629332943           | -0.00218337256631123 21635945.5         |
|                |         | 0.479593378890386             | 0.00229608329126768 0.00258764942349215 |
|                |         | 18.9773844641101              | 22.5749002457224                        |
| SP1-regulon    | GC LM02 |                               |                                         |
|                |         | 0.00916873290731819           | -0.00391283820509683 19830425.5         |
|                |         | 0.439571303707484             | 8.76804835306091e-12                    |
|                |         | 1.20879889915985e-11          | 54.1789577187807 59.9517572533195       |
| SP2-regulon    | GC LM02 |                               |                                         |
|                |         | 0.0279637627443042            | -0.000282731083180172 22255946.5        |

|                       |         |                       |                       |         |
|-----------------------|---------|-----------------------|-----------------------|---------|
| 0.493336636586492     |         | 0.46673107506606      | 0.470041224534613     | 100     |
| 100                   |         |                       |                       |         |
| SP3-regulon           | GC LM02 |                       |                       |         |
| 0.026570544352808     |         | -0.00173831637016003  | 19730035              |         |
| 0.43734599679388      |         | 7.7327555732531e-12   | 1.07652087392347e-11  | 100     |
| 100                   |         |                       |                       |         |
| SP4-regulon           | GC LM02 | 0.00481700456687575   | -0.0039085203557328   |         |
| 20385973              |         | 0.451885852320999     | 5.4814508082638e-11   |         |
| 7.48428860359095e-11  |         | 20.6489675516224      | 29.2071507473117      |         |
| SPI1-regulon          | GC LM02 | 0.465477200783423     | 0.0480102641407813    |         |
| 39748397              |         | 0.881083196604765     | 0                     | 100 100 |
| SPIB-regulon          | GC LM02 | 0.600064806004783     | 0.0364300835291677    |         |
| 36967086.5            |         | 0.819431252600824     |                       |         |
| 1.05270294869936e-266 |         | 1.06774156225221e-265 | 100                   | 100     |
| SREBF1-regulon        | GC LM02 |                       |                       |         |
| 0.0372248879086462    |         | -0.00378993497301015  | 20435602              |         |
| 0.452985953992125     |         | 2.81829031318292e-07  |                       |         |
| 3.47997586497369e-07  |         | 95.771878072763       | 96.9205798146938      |         |
| SREBF2-regulon        | GC LM02 | 0.113079002624021     | 0.0144195500896496    |         |
| 36686820              |         | 0.81321872272896      | 1.63248731563654e-256 |         |
| 1.54542132546926e-255 |         | 100                   | 100                   |         |
| SRF-regulon           | GC LM02 |                       |                       |         |
| 0.0153690404636159    |         | -0.00552394231897802  | 16624101.5            |         |
| 0.368498294165223     |         | 8.78061389113948e-47  |                       |         |
| 1.73173218408584e-46  |         | 96.6568338249754      | 97.9643364367998      |         |
| STAT1-regulon         | GC LM02 |                       |                       |         |
| 0.0705463575970419    |         | -0.00943358503613859  | 12538968              |         |
| 0.277945146003368     |         | 5.99204690547885e-130 |                       |         |
| 2.23913331731052e-129 |         | 100                   | 100                   |         |
| STAT2-regulon         | GC LM02 |                       |                       |         |
| 0.0659372628224737    |         | -0.000303903120245169 | 22639259              |         |
| 0.501833336536394     |         | 0.841288254389557     | 0.841288254389557     |         |
| 100                   |         | 99.9616763227305      |                       |         |
| STAT5A-regulon        | GC LM02 | 0.061038518717166     | -0.0108116277196947   |         |
| 15058841              |         | 0.333801933331875     | 1.21426096120612e-73  |         |
| 2.82664027034867e-73  |         | 100                   | 100                   |         |
| TBP-regulon           | GC LM02 | 0.0185790920419254    | -0.0023754126897792   |         |
| 21790994              |         | 0.483030262848468     | 0.0474255447327335    |         |
| 0.0506347921206628    |         | 48.2792527040315      | 49.9222254784824      |         |
| TCF12-regulon         | GC LM02 |                       |                       |         |
| 0.00649506309827131   |         | -0.00260708204089315  | 21838519              |         |
| 0.484083726184829     |         | 0.0226602993303505    | 0.0247520192685367    |         |
| 23.2055063913471      |         | 25.2665749904191      |                       |         |
| TFDP1-regulon         | GC LM02 | 0.553179665297578     | 0.0255899025604971    |         |
| 33081806              |         | 0.7333081477459       | 3.02700514783447e-143 |         |
| 1.22809923140713e-142 |         | 100                   | 100                   |         |
| TFDP2-regulon         | GC LM02 |                       |                       |         |
| 0.0260097235197388    |         | -0.00113895734261267  | 21937550              |         |
| 0.486278897729558     |         | 0.133953232311727     | 0.139862933737245     |         |
| 100                   |         | 99.9954913320859      |                       |         |

|                       |                       |                       |                     |  |
|-----------------------|-----------------------|-----------------------|---------------------|--|
| TFEC-regulon          | GC LM02               | 0.0736807098733097    | -0.0182703233251654 |  |
| 11945409              | 0.26478801513609      | 1.46791615594175e-145 |                     |  |
| 6.13070865128612e-145 | 100                   | 100                   |                     |  |
| THAP1-regulon         | GC LM02               |                       |                     |  |
| 0.0354413513501653    | -0.00176328164141257  | 19951606              |                     |  |
| 0.442257452341507     | 2.84572675471906e-10  |                       |                     |  |
| 3.84850665876293e-10  | 100                   | 100                   |                     |  |
| THAP11-regulon        | GC LM02               |                       |                     |  |
| 0.170622786935084     | -0.00803500949834585  | 12866657              |                     |  |
| 0.28520886714443      | 1.02874921641429e-121 | 3.65205971827072e-121 | 100                 |  |
| 100                   |                       |                       |                     |  |
| TP53-regulon          | GC LM02               |                       |                     |  |
| 0.0922175762840769    | -0.00627986479674787  | 19253534.5            |                     |  |
| 0.426783644210863     | 1.2739124661904e-15   |                       |                     |  |
| 1.82722798180845e-15  | 100                   | 100                   |                     |  |
| USF2-regulon          | GC LM02               |                       |                     |  |
| 0.138587206516026     | 0.771377807906497     | 0.0136059478306773    |                     |  |
| 34799246.5            | 0.771377807906497     |                       |                     |  |
| 4.38051158414607e-193 | 2.48813057979497e-192 | 100                   | 100                 |  |
| XBP1-regulon          | GC LM02               |                       |                     |  |
| 0.204057822194491     | 0.690164285529195     | 0.00896897476087172   |                     |  |
| 31135452.5            | 0.690164285529195     |                       |                     |  |
| 7.95393366096608e-96  | 2.30501750991262e-95  | 100                   | 100                 |  |
| YBX1-regulon          | GC LM02               |                       |                     |  |
| 0.0931649885591326    | -0.00206505699363146  | 20300030              |                     |  |
| 0.449980796044998     | 4.67174416467399e-08  |                       |                     |  |
| 5.92310420878309e-08  | 100                   | 100                   |                     |  |
| YY1-regulon           | GC LM02               |                       |                     |  |
| 0.65336631722129      | 0.0142135494450886    |                       |                     |  |
| 27762140              | 0.615389723912363     | 2.01977962135897e-36  |                     |  |
| 3.58510882791217e-36  | 100                   | 100                   |                     |  |
| YY2-regulon           | GC LM02               |                       |                     |  |
| 0.0293983418047986    | 0.309792822276047     | -0.0220990143839596   |                     |  |
| 13975715.5            | 0.309792822276047     |                       |                     |  |
| 6.00274645520822e-96  | 1.7758124929991e-95   | 82.3992133726647      |                     |  |
| 90.7166527649406      |                       |                       |                     |  |
| ZBTB33-regulon        | GC LM02               |                       |                     |  |
| 0.354234697959273     | 0.354234697959273     | -0.0118570649841255   |                     |  |
| 15925970              | 0.353023156044043     | 5.39241522854687e-58  |                     |  |
| 1.10974342384588e-57  | 100                   | 100                   |                     |  |
| ZNF143-regulon        | GC LM02               |                       |                     |  |
| 0.0197590427920553    | -0.00365357973788914  | 16805697              |                     |  |
| 0.37252363243557      | 4.54928634717199e-44  | 8.61331548397898e-44  | 100                 |  |
| 99.9932369981289      |                       |                       |                     |  |
| ZNF274-regulon        | GC LM02               |                       |                     |  |
| 0.051474226437309     | 0.051474226437309     | -0.0141852341535023   |                     |  |
| 10197387              | 0.226040469882996     | 9.77348717204298e-197 |                     |  |
| 5.7826465767921e-196  | 100                   | 100                   |                     |  |
| ZNF76-regulon         | GC LM02               |                       |                     |  |
| 0.0156999774094529    | 0.544467346881459     | 0.00116907287289054   |                     |  |
| 24562611.5            | 0.544467346881459     |                       |                     |  |
| 1.19196747311936e-06  | 1.44666137763204e-06  | 99.6066863323501      |                     |  |
| 99.4567055163552      |                       |                       |                     |  |
| ATF1-regulon          | LZ                    |                       |                     |  |
| 0.109902710534213     | 0.109902710534213     | 0.00373520529308961   |                     |  |
| 19307738              | 0.60464005218489      | 6.85382173070407e-22  |                     |  |
| 1.1186697537471e-21   | 100                   | 100                   |                     |  |
| ATF3-regulon          | LZ                    |                       |                     |  |

|                       |                      |                       |                      |
|-----------------------|----------------------|-----------------------|----------------------|
| 0.0485571259497651    |                      | -0.00250411298156023  | 15194822             |
| 0.475840202877215     |                      | 0.0264083569463439    | 0.0288460514336987   |
| 100                   | 100                  |                       |                      |
| ATF4-regulon          | LZ                   |                       |                      |
| 0.104299969181777     |                      | -0.00452294238313813  | 14266392.5           |
| 0.4467655561563       | 9.98385900720266e-07 | 1.20144743984981e-06  | 100                  |
| 100                   |                      |                       |                      |
| ATF5-regulon          | LZ                   | 0.128356172404225     | 0.0100815887623772   |
| 19393127.5            |                      | 0.607314105030233     |                      |
| 6.10772405835631e-23  |                      | 1.00848467010069e-22  | 100                  |
| 99.9977609099662      |                      |                       |                      |
| ATF6-regulon          | LZ                   | 0.13178333697426      | -0.00470474224435602 |
| 15418370.5            | 0.482840835302715    | 0.114833936838121     |                      |
| 0.121689694261292     | 100                  | 100                   |                      |
| ATF6B-regulon         | LZ                   |                       |                      |
| 0.0521918348986017    |                      | -0.00518639980318974  | 8454008.32226562     |
| 0.264745255666209     |                      | 1.15834273322327e-103 |                      |
| 5.67188510750705e-103 |                      | 99.8601398601399      | 99.9216318488166     |
| BACH1-regulon         | LZ                   | 0.0309532653604492    | -0.0125269607192822  |
| 10198708.5            |                      | 0.319382189651552     |                      |
| 7.22916415259545e-62  |                      | 1.93687039560105e-61  | 99.7202797202797     |
| 99.5611383533732      |                      |                       |                      |
| BATF-regulon          | LZ                   | 0.0449438244122143    | 0.0260611221649377   |
| 22678643              | 0.710203126176794    | 1.94234072985727e-93  |                      |
| 7.66145510110369e-93  |                      | 80.6993006993007      | 51.2527708739168     |
| BATF3-regulon         | LZ                   | 0.0983537040421334    | 0.0154332747425667   |
| 21749465.5            |                      | 0.681105055129372     |                      |
| 3.42566442565601e-62  |                      | 9.35469900852218e-62  | 100 100              |
| BCL11A-regulon        | LZ                   |                       |                      |
| 0.198470895000458     |                      | -0.00612596493724438  | 12443555             |
| 0.389681678121256     |                      | 3.76012652126142e-24  |                      |
| 6.67422457523903e-24  |                      | 100 100               |                      |
| BHLHE40-regulon       | LZ                   | 0.0425707298265197    | -0.0132898578600661  |
| 8747716.5             |                      | 0.273943004667798     |                      |
| 7.53085129535692e-96  |                      | 3.24054813315358e-95  | 100 100              |
| BRF2-regulon          | LZ                   | 0.0440496655412964    | 0.00247635065362301  |
| 17681048.5            |                      | 0.553698734037284     | 8.0305962981405e-07  |
| 9.74653567808505e-07  | 100                  | 99.7245919258413      |                      |
| CEBPB-regulon         | LZ                   |                       |                      |
| 0.137791751988585     |                      | -0.00538512379485878  | 13887803.5           |
| 0.43490968403308      | 2.21164158250617e-09 | 2.96276513882902e-09  | 100                  |
| 100                   |                      |                       |                      |
| CEBPG-regulon         | LZ                   |                       |                      |
| 0.0676233117637773    |                      | -0.000444424881943933 | 16735076             |
| 0.5240747117015       | 0.0269435598852913   | 0.0292059962115371    | 100                  |
| 100                   |                      |                       |                      |
| CLOCK-regulon         | LZ                   |                       |                      |
| 0.00803392197703036   |                      | -0.00768184987021716  | 12909940             |
| 0.404286964910328     |                      | 7.97390447877138e-21  |                      |
| 1.28669822271084e-20  |                      | 37.4825174825175      | 51.3109872147959     |



|                       |                       |                       |                      |
|-----------------------|-----------------------|-----------------------|----------------------|
| CREB1-regulon         | LZ                    | 0.046206817176478     | 0.00328742144368133  |
| 18119286              | 0.567422555277731     | 5.80017759663732e-10  |                      |
| 7.91947325694711e-10  | 100                   | 99.9932827298986      |                      |
| CREB3-regulon         | LZ                    | 0.244678456228939     | 0.00495654410710142  |
| 20842665              | 0.65270774097267      | 9.78995793200431e-45  |                      |
| 2.01474496571683e-44  | 100                   | 100                   |                      |
| CREB3L2-regulon       | LZ                    | 0.12285954332926      | -0.00398037926787048 |
| 15810193.5            | 0.495111142635829     | 0.653245452169407     |                      |
| 0.658135303585789     | 100                   | 100                   |                      |
| CREB3L4-regulon       | LZ                    |                       |                      |
| 0.0041247290259148    | -0.00708830767186056  | 13508116.5            |                      |
| 0.423019427002768     | 7.88435629474671e-18  |                       |                      |
| 1.25795347624049e-17  | 17.9020979020979      | 31.5622131165894      |                      |
| CREB5-regulon         | LZ                    |                       |                      |
| 0.0369591281431482    | -0.00225064857395069  | 15555658              |                      |
| 0.487140123037214     | 0.23730417928255      | 0.245964915752716     |                      |
| 99.7202797202797      | 99.6215937842861      |                       |                      |
| CREM-regulon          | LZ                    | 0.169615753061679     | 0.0199302403794519   |
| 26264103              | 0.822485192647079     | 5.34921729910649e-193 |                      |
| 1.51917771294624e-191 | 100                   | 100                   |                      |
| CTCF-regulon          | LZ                    | 0.376033156397335     | 0.00527604047907204  |
| 19454487.5            | 0.609235651386521     |                       |                      |
| 1.03583424734022e-23  | 1.75105313240847e-23  | 100                   | 100                  |
| CUX1-regulon          | LZ                    | 0.0849083813500176    | 0.00834175883610822  |
| 21659762              | 0.678295905299331     | 2.47078555999295e-60  |                      |
| 6.15529034243858e-60  | 100                   | 100                   |                      |
| DDIT3-regulon         | LZ                    |                       |                      |
| 0.0783754609791892    | -0.00663725091703334  | 13141741.5            |                      |
| 0.411546047826024     | 4.34854129030035e-16  |                       |                      |
| 6.71187894807229e-16  | 100                   | 100                   |                      |
| E2F1-regulon          | LZ                    | 0.487465147677132     | 0.0505670150328627   |
| 26410291              | 0.827063207945857     | 1.85925841343786e-198 |                      |
| 6.60036736770442e-197 | 100                   | 100                   |                      |
| E2F2-regulon          | LZ                    |                       |                      |
| 0.0476904067020347    | -0.00633033367510999  | 11071026.5            |                      |
| 0.346699651751039     | 4.53504961685499e-45  |                       |                      |
| 9.47025067049131e-45  | 100                   | 100                   |                      |
| E2F3-regulon          | LZ                    |                       |                      |
| 0.0170829586628162    | -0.00409689947346119  | 10995116              |                      |
| 0.344322442743884     | 2.00947095121389e-46  |                       |                      |
| 4.32340719806625e-46  | 100                   | 100                   |                      |
| E2F4-regulon          | LZ                    | 0.441164721243537     | 0.0431877182581645   |
| 25104109              | 0.786158884889321     | 2.10544107895528e-152 |                      |
| 1.99315088807766e-151 | 100                   | 100                   |                      |
| E2F6-regulon          | LZ                    | 0.0885520792444252    | 0.0164094269751037   |
| 23180434.5            | 0.725917200955825     |                       |                      |
| 9.83954139206558e-96  | 4.10945552256857e-95  | 100                   | 100                  |
| E2F7-regulon          | LZ                    |                       |                      |
| 0.0227067939519801    | -0.00799318371441721  | 7935846               |                      |
| 0.248518513125217     | 3.69123704901578e-118 |                       |                      |

|                                       |                       |                       |     |
|---------------------------------------|-----------------------|-----------------------|-----|
| 2.27893765634887e-117                 | 100                   | 100                   |     |
| E2F8-regulon LZ                       | 0.0750866389185429    |                       |     |
| 0.000294671314143041                  | 18258787.5            | 0.571791176513417     |     |
| 4.18939453904228e-11                  | 5.83229435827455e-11  | 100                   | 100 |
| EGR1-regulon LZ                       | 0.055953959479275     | 0.00862688717118879   |     |
| 22693069 0.710654889992567            |                       | 1.74379148320953e-83  |     |
| 5.62769069581257e-83                  | 100                   | 100                   |     |
| EGR2-regulon LZ                       | 0.0656901235588109    | 0.0199566767515128    |     |
| 23342953.5                            | 0.731006636944704     |                       |     |
| 5.23648253092988e-100                 | 2.39864683674852e-99  | 100                   |     |
| 99.9955218199324                      |                       |                       |     |
| EGR3-regulon LZ                       | 0.058014750441935     | 0.0168084623444441    |     |
| 22708965 0.711152688246797            |                       | 7.16863479639645e-84  |     |
| 2.36731660718208e-83                  | 100                   | 99.9955218199324      |     |
| ELF1-regulon LZ                       | 0.732088133012172     | 0.0254444265514419    |     |
| 24098199 0.754657863128341            |                       | 4.10851525683387e-121 |     |
| 2.65185984759277e-120                 | 100                   | 100                   |     |
| ELF2-regulon LZ                       | 0.0184489087926076    | -0.014434602562053    |     |
| 8186010 0.256352635072323             |                       | 4.93953690804311e-111 |     |
| 2.59783052200786e-110                 | 98.7412587412587      | 99.5477038131703      |     |
| ELF4-regulon LZ                       |                       |                       |     |
| 0.0106237814744039                    | -0.00794856781827925  | 8864812.5             |     |
| 0.277609976508344                     | 7.92393224562792e-93  |                       |     |
| 3.04107669967342e-92                  | 95.3846153846154      | 98.383376995589       |     |
| ELK1-regulon LZ                       | 0.0709576259826713    | 0.00498114367427677   |     |
| 19470343 0.609732181344998            |                       | 6.51605518069636e-24  |     |
| 1.11479498272155e-23                  | 100                   | 100                   |     |
| ELK3-regulon LZ                       |                       |                       |     |
| 0.0581295608492649                    | -0.00688437389838458  | 11971715              |     |
| 0.37490556285478 1.38971427878346e-30 |                       | 2.56284970892534e-30  | 100 |
| 100                                   |                       |                       |     |
| ELK4-regulon LZ                       | 0.0479551478824206    | 0.00300547244869868   |     |
| 17126984.5                            | 0.536347696547871     |                       |     |
| 0.000837137988998219                  | 0.000950988755501977  | 98.4615384615385      |     |
| 96.7018203801975                      |                       |                       |     |
| ESRRA-regulon LZ                      | 0.110090123933903     | 0.0186482430821312    |     |
| 23948747 0.74997763258662             | 8.96648067417185e-117 |                       |     |
| 5.30516773221835e-116                 | 100                   | 100                   |     |
| ETS1-regulon LZ                       | 0.270643036861273     | 0.0281475585515932    |     |
| 23939200.5                            | 0.749678674922176     |                       |     |
| 1.68676588357608e-116                 | 9.58083021871214e-116 | 100                   | 100 |
| ETV2-regulon LZ                       |                       |                       |     |
| 0.0208775938286336                    | -0.00784809618258055  | 8587802               |     |
| 0.268935131056445                     | 4.67287689831713e-100 |                       |     |
| 2.21182839853677e-99                  | 100                   | 100                   |     |
| ETV3-regulon LZ                       |                       |                       |     |
| 0.007125754426834                     | -0.00437219479780463  | 11809975.5            |     |
| 0.369840537644662                     | 4.31286152461694e-33  |                       |     |
| 8.27603157426495e-33                  | 74.2657342657343      | 84.5099751461006      |     |
| ETV5-regulon LZ                       | 0.038031191259167     | 0.00464067322516646   |     |

|                       |                      |                       |     |
|-----------------------|----------------------|-----------------------|-----|
| 20786467.5            | 0.650947863180012    |                       |     |
| 9.45583459332668e-44  | 1.91818358893198e-43 | 100                   | 100 |
| ETV6-regulon LZ       | 0.444836029699554    | -0.0149748271622394   |     |
| 9110959               | 0.285318286648306    | 1.23763168107382e-86  |     |
| 4.28643167591421e-86  | 100                  | 100                   |     |
| ETV7-regulon LZ       |                      |                       |     |
| 0.0610855501668822    | -0.00303840617723092 | 14668160.5            |     |
| 0.459347300557753     | 0.000187147611288704 |                       |     |
| 0.000216056591894276  | 100                  | 100                   |     |
| FLI1-regulon LZ       | 0.144559953033389    |                       |     |
| 0.000638498416938416  | 15493074             | 0.485180245964823     |     |
| 0.173244002505578     | 0.182227024857719    | 100                   | 100 |
| FOS-regulon LZ        | 0.0726373861944332   | -0.0138585101446532   |     |
| 8282060               | 0.259360531544316    | 2.34550181577115e-108 |     |
| 1.18950449228394e-107 | 100                  | 100                   |     |
| FOSB-regulon LZ       | 0.0255582443700753   | -0.0161700324399381   |     |
| 9031597               | 0.28283299065861     | 1.31674169578161e-88  |     |
| 4.79429027694841e-88  | 98.4615384615385     | 99.3372293499922      |     |
| FOSL1-regulon LZ      | 0.0681124415344892   | 0.0074359041396318    |     |
| 20586541.5            | 0.644686991654144    |                       |     |
| 2.44345271955422e-40  | 4.88690543910845e-40 | 100                   | 100 |
| FOX01-regulon LZ      |                      |                       |     |
| 0.00782698748190721   | -0.00901200178226094 | 12654240              |     |
| 0.39627947789431      | 5.91807865864038e-24 | 1.02483801161821e-23  |     |
| 38.4615384615385      | 52.5648776337297     |                       |     |
| FOX03-regulon LZ      | 0.00578912325661902  | -0.0141781985416088   |     |
| 11353621.5            | 0.355549381095159    |                       |     |
| 4.77172163082765e-47  | 1.04243764858081e-46 | 21.3986013986014      |     |
| 47.1664315622131      |                      |                       |     |
| GABPA-regulon LZ      |                      |                       |     |
| 0.0234688925217079    | -0.00205135820466057 | 13848058.5            |     |
| 0.433665031817783     | 1.08875235611803e-09 | 1.4724079482739e-09   |     |
| 100                   | 100                  |                       |     |
| GTF2B-regulon LZ      | 0.0820802600068792   | 0.00307168059947692   |     |
| 17725670.5            | 0.555096114114049    |                       |     |
| 4.12636530613371e-07  | 5.18534401301758e-07 | 100                   | 100 |
| HINFP-regulon LZ      |                      |                       |     |
| 0.0122286468887057    | -0.00406596759139901 | 14368221.5            |     |
| 0.449954427471724     | 2.38595241548371e-06 | 2.8471028823419e-06   |     |
| 58.7412587412587      | 63.3057925259175     |                       |     |
| HIVEP3-regulon LZ     | 0.115834848862897    | 0.0387575936788788    |     |
| 24526695              | 0.76807662009516     | 5.35641329183168e-134 |     |
| 4.47418051435352e-133 | 100                  | 99.6887664853004      |     |
| HOXB2-regulon LZ      | 0.0175061632394759   | -0.0199102923102217   |     |
| 9945043.5             | 0.31143843058265     | 1.51291686538972e-67  |     |
| 4.57094031670936e-67  | 71.6083916083916     | 83.9233335572423      |     |
| IKZF1-regulon LZ      | 0.161592936688541    | 0.0180126327957263    |     |
| 27484277              | 0.860696093946581    | 6.46265233077325e-241 |     |
| 3.05898876989934e-239 | 100                  | 100                   |     |
| IRF1-regulon LZ       | 0.11277666332701     | -0.02302864815595     |     |

|                       |                       |                       |
|-----------------------|-----------------------|-----------------------|
| 6353256.5             | 0.198958228131332     | 1.88806621003517e-168 |
| 2.43732183477268e-167 | 100 100               |                       |
| IRF2-regulon LZ       | 0.0686422929417581    | -0.0166403340358337   |
| 7588753               | 0.237648967990877     | 2.02895942094274e-128 |
| 1.60062354318816e-127 | 100 100               |                       |
| IRF3-regulon LZ       |                       |                       |
| 0.144148697016116     | -0.00131860942934439  | 15128026              |
| 0.473748423046468     | 0.0158488996292853    | 0.0175823730262384    |
| 100 100               |                       |                       |
| IRF4-regulon LZ       | 0.0608776734146125    | 0.00250479193049014   |
| 18320911.5            | 0.573736648251326     | 1.2354992400917e-11   |
| 1.73703853557446e-11  | 100                   | 99.9955218199324      |
| IRF5-regulon LZ       |                       |                       |
| 0.0380104377838089    | -0.00917895343721174  | 14005566.5            |
| 0.438597543608627     | 1.48178692951658e-08  |                       |
| 1.91285221810322e-08  | 80.5594405594406      | 80.4773739952083      |
| IRF7-regulon LZ       | 0.097529220630825     | -0.0104704600161319   |
| 10499393.5            | 0.328798424432199     |                       |
| 9.05659785805688e-56  | 2.14339482640679e-55  | 100 100               |
| IRF8-regulon LZ       | 0.0944604998770516    | 0.0128906969107118    |
| 22736051              | 0.712000911920305     | 1.56866469377418e-84  |
| 5.30358063133175e-84  | 100 100               |                       |
| IRF9-regulon LZ       | 0.0273691156207345    | -0.0066519213565724   |
| 10888478              | 0.34098297305122      | 2.32736598991635e-48  |
| 5.1638432901269e-48   | 100 100               |                       |
| JUN-regulon LZ        | 0.069835362171845     | -0.0188621361544387   |
| 5696405.5             | 0.178388318651636     |                       |
| 5.7698752916363e-192  | 1.17046041630336e-190 | 100 100               |
| JUNB-regulon LZ       | 0.147596082178817     | -0.0123815068150752   |
| 10251122              | 0.321023567910113     | 8.81764275824056e-61  |
| 2.31871346605585e-60  | 100 100               |                       |
| JUND-regulon LZ       |                       |                       |
| 0.0311820603162496    | -0.00739210654456967  | 10254739.5            |
| 0.321136853339446     | 1.0470325532472e-60   |                       |
| 2.65497540287683e-60  | 100 100               |                       |
| KLF11-regulon LZ      | 0.0114077913062685    | -0.0106972556594974   |
| 13813799.5            | 0.43259217887417      | 3.51446651582187e-12  |
| 5.09239025761945e-12  | 31.4685314685315      | 41.0089339692349      |
| KLF12-regulon LZ      | 0.0523538515193747    | 0.005389144657658     |
| 18354495.5            | 0.574788362932381     |                       |
| 6.30178932984639e-12  | 9.03893014988068e-12  | 99.7202797202797      |
| 98.5848950986319      |                       |                       |
| KLF13-regulon LZ      |                       |                       |
| 0.058621217127666     | -0.00779368855843865  | 10481536.5            |
| 0.328239215610748     | 4.01674302956046e-56  |                       |
| 9.66741542707773e-56  | 100 100               |                       |
| KLF2-regulon LZ       | 0.0877619381130509    | -0.0214240120220074   |
| 7678421.5             | 0.240457021762859     |                       |
| 9.98325300132363e-126 | 7.46116803256819e-125 | 100 100               |
| KLF3-regulon LZ       | 0.037557651479706     | -0.0350234380939885   |

5939066 0.18598746140897 4.25377509449971e-183  
6.71151181576621e-182 99.8601398601399 99.8634155079376  
KLF4-regulon LZ 0.00951555518618337 -0.0064864448268178  
13745220 0.430444547056356 7.99697506829912e-12  
1.13557045969847e-11 40.8391608391608 49.9563377443407  
KLF6-regulon LZ 0.0408946791434642 -0.0289412314358411  
5696140 0.178380004268363 5.64089460845727e-192  
1.17046041630336e-190 100 100  
KLF7-regulon LZ 0.0195295001710399 -0.0268929968697072  
6132510.5 0.192045358640374  
3.49783140500642e-176 4.96692059510912e-175 87.4125874125874  
97.7183672555473  
KLF8-regulon LZ 0.00833627910550987 -0.0170389309162599  
8880364.5 0.278097002077656  
1.87596718468394e-93 7.61106686357483e-93 54.965034965035  
77.9987013277804  
MAFB-regulon LZ  
0.0517425650682268 -0.00410502411275241 13363300  
0.418484361521911 6.84302359380963e-14  
1.03373335140528e-13 100 99.9977609099662  
MAFF-regulon LZ  
0.00540429677485515 -0.00709443260785198 14016194  
0.438930353809107 1.90129004623119e-12  
2.78333182025597e-12 17.9020979020979 28.7163296836166  
MAFG-regulon LZ  
0.0179153802669913 -0.00761191508404458 14011004.5  
0.438767839714975 5.28910103551868e-09  
7.01918081349208e-09 53.1468531468531 58.6887888762007  
MAX-regulon LZ  
0.191403627238729 -0.00636690754823133 10253907  
0.321110782815626 1.00645844014105e-60  
2.59849270000053e-60 100 100  
MAZ-regulon LZ 0.13644883146698 0.000147340021254855  
17086429 0.535077662759533 0.00126658071278513  
0.00142741635885309 100 100  
MEF2A-regulon LZ  
0.0396675509843516 -0.00110416282345398 15166449.5  
0.474951691241071 0.0213462938197969 0.0234974707163655  
100 99.9977609099662  
MLX-regulon LZ  
0.0509093465510898 -0.00204838814950491 15310971.5  
0.479477534176265 0.059308108035034 0.0633214386539461  
100 99.9888045498309  
MXD4-regulon LZ  
0.0908091908091908 -0.00138171066088917 17799491  
0.557407872797139 1.29621288293472e-07  
1.65821828267324e-07 93.986013986014 88.517946306621  
MXI1-regulon LZ 0.0426122920603618 -0.0229793503882208  
6423809 0.201167646307701 5.12347196492311e-166  
5.59640783860832e-165 100 100

|                       |    |                      |                  |                       |
|-----------------------|----|----------------------|------------------|-----------------------|
| MYBL1-regulon         | LZ |                      |                  |                       |
| 0.0242345522893156    |    | -0.00574621099378379 |                  | 15810936              |
| 0.495134394724641     |    | 0.653500547926735    |                  | 0.658135303585789     |
| 85.4545454545455      |    | 79.973578737601      |                  |                       |
| MYC-regulon           | LZ | 0.352582824562713    |                  | 0.0383046404399546    |
| 24120750              |    | 0.75536406899341     |                  | 8.95394905195546e-122 |
| 6.05457507322703e-121 |    | 100                  | 100              |                       |
| NFATC1-regulon        | LZ | 0.143937437154911    |                  | 0.094915195424823     |
| 28895407              |    | 0.904886962749527    |                  | 4.79106864604513e-303 |
| 3.40165873869204e-301 |    | 100                  | 94.7448556906473 |                       |
| NFE2L1-regulon        | LZ | 0.190872504755435    |                  | 0.00833672591072895   |
| 18433047.5            |    | 0.577248293007009    |                  |                       |
| 1.25936344468128e-12  |    | 1.86280842859106e-12 |                  | 100                   |
| 99.9350663890195      |    |                      |                  |                       |
| NFE2L2-regulon        | LZ | 0.121440302636867    |                  | 0.0107288306796024    |
| 21349064              |    | 0.668566103966117    |                  | 4.03323696167544e-54  |
| 9.38884669767069e-54  |    | 100                  | 100              |                       |
| NFKB1-regulon         | LZ | 0.0660492731931427   |                  | 0.009530653223516     |
| 20318810.5            |    | 0.6363027425095      |                  | 5.41597187102785e-36  |
| 1.05351781600816e-35  |    | 100                  | 99.9305882089519 |                       |
| NFKB2-regulon         | LZ | 0.0825581734777225   |                  | 0.00932857299341804   |
| 20439994.5            |    | 0.64009773393128     |                  | 6.28682595600077e-38  |
| 1.23990178576682e-37  |    | 100                  | 100              |                       |
| NFYA-regulon          | LZ |                      |                  |                       |
| 0.0141514759579542    |    | -0.00690574554148693 |                  | 10329793              |
| 0.32348722458214      |    | 3.60786922041534e-59 |                  | 8.83305912584445e-59  |
| 97.3426573426573      |    | 99.043908555563      |                  |                       |
| NFYB-regulon          | LZ | 0.114943921138376    |                  | 0.00642018880762529   |
| 21999908.5            |    | 0.688947914225002    |                  |                       |
| 1.56490540821513e-67  |    | 4.62951183263642e-67 |                  | 100 100               |
| NFYC-regulon          | LZ | 0.0873276654000135   |                  | 0.00385364948124337   |
| 20036179              |    | 0.627451870133404    |                  | 1.10460168155466e-31  |
| 2.06386103658897e-31  |    | 100                  | 100              |                       |
| NR1H3-regulon         | LZ | 0.00398187261131423  |                  | -0.0046253991170876   |
| 14689349              |    | 0.460010838448401    |                  | 4.18405313491993e-07  |
| 5.21171530840903e-07  |    | 15.1048951048951     |                  | 22.2162513154654      |
| NR2C2-regulon         | LZ | 0.0103927541285172   |                  | -0.011575817143873    |
| 10721967              |    | 0.335768523811783    |                  | 3.66354177062766e-52  |
| 8.25750684808139e-52  |    | 59.1608391608392     |                  | 76.2477329213408      |
| NR3C1-regulon         | LZ | 0.231474820821199    |                  | 0.00609324817327958   |
| 18829978.5            |    | 0.589678562184776    |                  |                       |
| 1.70814528602897e-16  |    | 2.66545747929795e-16 |                  | 100 100               |
| NRF1-regulon          | LZ |                      |                  |                       |
| 0.0231461139604565    |    | -0.00364041484801726 |                  | 13101073              |
| 0.410272475335954     |    | 1.6450726281337e-16  |                  |                       |
| 2.59555903549984e-16  |    | 100                  | 99.9664136494928 |                       |
| PAX5-regulon          | LZ | 0.114786598083132    |                  | 0.0147513595773599    |
| 22839900.5            |    | 0.71525305710165     |                  | 4.37527818319649e-87  |
| 1.55322375503475e-86  |    | 100                  | 100              |                       |
| POU2F1-regulon        | LZ |                      |                  |                       |

|                       |                      |                       |
|-----------------------|----------------------|-----------------------|
| 0.00152517166091827   | -0.00340851800856538 | 14245208.5            |
| 0.446102159187401     | 2.16987473354358e-13 |                       |
| 3.24339170698093e-13  | 7.97202797202797     | 18.5127963995432      |
| POU6F1-regulon LZ     |                      |                       |
| 0.0256219755371819    | -0.00546628787487383 | 14658646              |
| 0.459049345003533     | 0.000121083959590008 |                       |
| 0.000140933789030992  | 60.8391608391608     | 65.4262107879358      |
| REL-regulon LZ        | 0.280701358904919    | 0.0172613682076824    |
| 23316657              | 0.730183137209402    | 2.61226935257087e-99  |
| 1.15919452520332e-98  | 100                  | 100                   |
| RELA-regulon LZ       |                      |                       |
| 0.0858405176886717    | -0.00632358616832687 | 10680505              |
| 0.334470102119729     | 2.97565507890636e-52 |                       |
| 6.81521001943069e-52  | 100                  | 100                   |
| RELB-regulon LZ       | 0.123678663979269    | 0.0187910805148989    |
| 26233102              | 0.821514367050741    | 7.51730508161064e-192 |
| 1.33432165198589e-190 | 100                  | 100                   |
| REST-regulon LZ       | 0.219627070477499    | 0.00102474554542656   |
| 16224338              | 0.508080468824742    | 0.457754177845515     |
| 0.467633764417721     | 100                  | 100                   |
| RFX5-regulon LZ       | 0.0732003059473891   | 0.00797753530605549   |
| 22233525.5            | 0.69626385123799     | 1.02403816633463e-72  |
| 3.16116129607645e-72  | 100                  | 100                   |
| RXRA-regulon LZ       | 0.0295172064402833   | 0.0152270030387747    |
| 22744473.5            | 0.712264670463099    |                       |
| 1.06774311482411e-88  | 3.98998742907955e-88 | 86.4335664335664      |
| 63.9081077450124      |                      |                       |
| SETDB1-regulon LZ     | 0.0598416580589754   | 0.00012611841806582   |
| 16044117.5            | 0.502436693643787    | 0.822810672584136     |
| 0.822810672584136     | 98.4615384615385     | 94.9978728644679      |
| SOX5-regulon LZ       |                      |                       |
| 0.00488735561585962   | -0.00296263075546606 | 15044366.5            |
| 0.47112854678516      | 0.000284215888238903 | 0.000325473033305841  |
| 17.3426573426573      | 22.5767448109088     |                       |
| SP1-regulon LZ        |                      |                       |
| 0.00918961237867844   | -0.00386516564894309 | 13760930.5            |
| 0.430936536202876     | 5.27533483442215e-11 |                       |
| 7.27279171347519e-11  | 49.9300699300699     | 59.9807438257092      |
| SP2-regulon LZ        |                      |                       |
| 0.0251094652202786    | -0.00318081262329494 | 12523674.5            |
| 0.392190695938933     | 3.87770656715615e-23 |                       |
| 6.47805097101381e-23  | 100                  | 100                   |
| SP3-regulon LZ        |                      |                       |
| 0.0231442945375912    | -0.00520766412483396 | 10133616.5            |
| 0.317343772190283     | 3.13599244319933e-63 |                       |
| 8.90621853868609e-63  | 100                  | 100                   |
| SP4-regulon LZ        |                      |                       |
| 0.00312971370065774   | -0.00559639427700813 | 13745905              |
| 0.430465998478358     | 1.55114137116868e-15 |                       |
| 2.36840940544035e-15  | 16.9230769230769     | 29.2089294910548      |

|                       |                       |                       |                     |
|-----------------------|-----------------------|-----------------------|---------------------|
| SPI1-regulon          | LZ                    | 0.435360796089156     | 0.0170870631560839  |
| 20924719              | 0.655277339485038     | 3.40720435768758e-46  |                     |
| 7.22123908644233e-46  | 100                   | 100                   |                     |
| SPIB-regulon          | LZ                    | 0.62005276861915      | 0.0564917011902971  |
| 29540589.5            | 0.925091462130489     | 0                     | 0 100 100           |
| SREBF1-regulon        | LZ                    |                       |                     |
| 0.0377487441119787    | -0.00323206436007574  | 14544574.5            |                     |
| 0.455477088237215     | 4.28636656476268e-05  |                       |                     |
| 5.07220043496917e-05  | 97.3426573426573      | 96.8876648530037      |                     |
| SREBF2-regulon        | LZ                    | 0.100704302705985     | 0.00174923174460868 |
| 16906711              | 0.529449623840703     | 0.00680457715293497   |                     |
| 0.00760826736784855   | 100                   | 100                   |                     |
| SRF-regulon           | LZ                    |                       |                     |
| 0.0135702524134703    | -0.00731417487049001  | 10118454.5            |                     |
| 0.316868959839337     | 1.50045256111178e-63  |                       |                     |
| 4.34825027914026e-63  | 96.5034965034965      | 97.957949889165       |                     |
| STAT1-regulon         | LZ                    | 0.0681874704119705    | -0.0117664464191995 |
| 7398154.5             | 0.231680195937602     |                       |                     |
| 3.0853279210263e-134  | 2.73822852991084e-133 | 100                   | 100                 |
| STAT2-regulon         | LZ                    |                       |                     |
| 0.057885070049972     | -0.00848295241387322  | 12389562.5            |                     |
| 0.387990851986284     | 7.57505993994168e-25  |                       |                     |
| 1.36159305249585e-24  | 100                   | 99.9619354694252      |                     |
| STAT5A-regulon        | LZ                    | 0.0768940024635359    | 0.00537080308227182 |
| 19562686.5            | 0.612624005268595     |                       |                     |
| 4.20517871886223e-25  | 7.65558177023637e-25  | 100                   | 100                 |
| TBP-regulon           | LZ                    | 0.0141077689975372    | -0.0069022566885666 |
| 14358712.5            | 0.4496566441552       | 7.49263576551991e-07  |                     |
| 9.17201964399851e-07  | 44.6153846153846      | 49.9697722845436      |                     |
| TCF12-regulon         | LZ                    |                       |                     |
| 0.0047669547772154    | -0.00434522727722649  | 14622253              |                     |
| 0.457909663834296     | 3.96230500161736e-07  |                       |                     |
| 5.02363669847915e-07  | 17.9020979020979      | 25.3375428225969      |                     |
| TFDP1-regulon         | LZ                    | 0.5645440224595       | 0.0369631570779982  |
| 25531427              | 0.799540751673485     | 8.53613425951078e-167 |                     |
| 1.01010922070878e-165 | 100                   | 100                   |                     |
| TFDP2-regulon         | LZ                    |                       |                     |
| 0.0247037775422055    | -0.00245810916543534  | 14220739.5            |                     |
| 0.445335889340726     | 5.07818235462248e-07  |                       |                     |
| 6.27045125527298e-07  | 100                   | 99.9955218199324      |                     |
| TFEC-regulon          | LZ                    |                       |                     |
| 0.0869235916149632    | -0.00469188487655316  | 14601692.5            |                     |
| 0.457265792356811     | 8.59971921661573e-05  |                       |                     |
| 0.000100922324690862  | 100                   | 100                   |                     |
| THAP1-regulon         | LZ                    |                       |                     |
| 0.0334174618615228    | -0.00380764917418012  | 11857312.5            |                     |
| 0.371322940510823     | 2.90852567104171e-32  |                       |                     |
| 5.50680860383897e-32  | 100                   | 100                   |                     |
| THAP11-regulon        | LZ                    |                       |                     |
| 0.178315362631696     | -0.000164946407998912 | 15219688.5            |                     |



|                       |                       |                       |                      |
|-----------------------|-----------------------|-----------------------|----------------------|
| 0.476618920811841     |                       | 0.0316666420233802    | 0.0340656300554544   |
| 100                   | 100                   |                       |                      |
| TP53-regulon          | LZ                    | 0.110309367008396     | 0.0121440311096432   |
| 21797245              | 0.682601315300986     | 3.41415654754751e-63  |                      |
| 9.50608293630875e-63  | 100                   | 100                   |                      |
| USF2-regulon          | LZ                    |                       |                      |
| 0.120997807324993     | -0.00435705286203447  | 12445204.5            |                      |
| 0.389733333771757     | 3.94726500004525e-24  |                       |                      |
| 6.91989666674599e-24  | 100                   | 100                   |                      |
| XBP1-regulon          | LZ                    | 0.190481136886898     | -0.0048857150780281  |
| 15606649              | 0.488736954364683     | 0.300663494558757     |                      |
| 0.309378378459011     | 100                   | 100                   |                      |
| YBX1-regulon          | LZ                    |                       |                      |
| 0.0943352008170597    | -0.000862146207312828 | 15522218.5            |                      |
| 0.486092933510143     | 0.201255479498162     | 0.210134397711317     |                      |
| 100                   | 100                   |                       |                      |
| YY1-regulon           | LZ                    | 0.680269540467937     | 0.0414513669168742   |
| 25370657.5            | 0.79450610292956      | 2.6481348182336e-161  |                      |
| 2.68596531563694e-160 | 100                   | 100                   |                      |
| YY2-regulon           | LZ                    | 0.0280839856322263    | -0.0232849780512014  |
| 9530035.5             | 0.298442063075636     |                       |                      |
| 1.18383787393395e-76  | 3.73566617996934e-76  | 80.4195804195804      |                      |
| 90.6921027294508      |                       |                       |                      |
| ZBTB33-regulon        | LZ                    | 0.371872310032725     | 0.00614309441826505  |
| 17939794.5            | 0.561801609420337     |                       |                      |
| 1.35300063213324e-08  | 1.76262467672404e-08  | 100                   | 100                  |
| ZNF143-regulon        | LZ                    |                       |                      |
| 0.016118340391835     | -0.00732786224458525  | 8089315               |                      |
| 0.25332453981611      | 9.24150835442538e-114 | 5.04728533203232e-113 |                      |
| 99.7202797202797      | 99.9977609099662      |                       |                      |
| ZNF274-regulon        | LZ                    | 0.0526195053445954    | -0.0129256986211276  |
| 7802541.5             | 0.244343956797776     |                       |                      |
| 4.7632560704762e-122  | 3.3819118100381e-121  | 100                   | 100                  |
| ZNF76-regulon         | LZ                    | 0.012818683959738     | -0.0017662539577195  |
| 13942462.5            | 0.436621382245081     |                       |                      |
| 5.74033389088378e-09  | 7.54747604171756e-09  | 99.8601398601399      |                      |
| 99.4536620317503      |                       |                       |                      |
| ATF1-regulon          | Memory 1              |                       |                      |
| 0.103659971137685     | -0.00266573284336021  | 34217637              |                      |
| 0.463205883581229     | 2.70855166940717e-07  |                       |                      |
| 3.77072879466488e-07  | 100                   | 100                   |                      |
| ATF3-regulon          | Memory 1              |                       |                      |
| 0.048778415527101     | -0.00233020382301172  | 36198073              |                      |
| 0.490015145929067     | 0.162843524549776     | 0.176517408290597     |                      |
| 100                   | 100                   |                       |                      |
| ATF4-regulon          | Memory 1              | 0.106588975310731     | -0.002246381770995   |
| 36547098              | 0.49473991501575      | 0.46222036400622      | 0.482612438888848    |
| 100                   | 100                   |                       |                      |
| ATF5-regulon          | Memory 1              | 0.11852293249536      | 9.29550557832726e-05 |
| 37825273.5            | 0.512042641438658     | 0.0923389924764069    |                      |

|                       |                      |                       |  |
|-----------------------|----------------------|-----------------------|--|
| 0.102438569778514     | 100                  | 99.9977108847431      |  |
| ATF6-regulon          | Memory 1             |                       |  |
| 0.134416593991111     | -0.00207466688745661 | 41569722.5            |  |
| 0.562731437031698     | 1.820192733147e-18   |                       |  |
| 3.31368420649839e-18  | 100                  | 100                   |  |
| ATF6B-regulon         | Memory 1             |                       |  |
| 0.0603693768791612    |                      | 0.00319181282590388   |  |
| 47259622.453125       | 0.639755900622684    |                       |  |
| 5.53503701901032e-85  | 3.57261480317939e-84 | 100                   |  |
| 99.9175918507497      |                      |                       |  |
| BACH1-regulon         | Memory 1             |                       |  |
| 0.0442928205332679    |                      | 0.00104908006954242   |  |
| 38376200.5            | 0.519500568116171    | 0.00641899373798467   |  |
| 0.00779057359652841   | 99.8817267888823     | 99.5513334096372      |  |
| BATF-regulon          | Memory 1             |                       |  |
| 0.0153898574122718    | -0.00405459607602397 | 35819576.5            |  |
| 0.48489141965554      | 0.0249849318987579   | 0.0286117768518035    |  |
| 50.7983441750443      | 51.7523177291977     |                       |  |
| BATF3-regulon         | Memory 1             |                       |  |
| 0.066520165208724     |                      | -0.0172877000074857   |  |
| 26443700              | 0.357969705028344    | 1.07120491377956e-87  |  |
| 7.24338560746181e-87  | 100                  | 100                   |  |
| BCL11A-regulon        | Memory 1             |                       |  |
| 0.220122549376242     |                      | 0.0162269371384526    |  |
| 51070898              | 0.691349330562389    | 1.42333155212301e-157 |  |
| 2.88732972002097e-156 | 100                  | 100                   |  |
| BHLHE40-regulon       | Memory 1             |                       |  |
| 0.0597299828033509    |                      | 0.00423669271347783   |  |
| 42101294              | 0.569927347326267    | 1.46061304350124e-22  |  |
| 2.88065350246077e-22  | 100                  | 100                   |  |
| BRF2-regulon          | Memory 1             |                       |  |
| 0.0390994374302159    | -0.00261016949128843 | 33869865.5            |  |
| 0.458498083187477     | 6.60469794345402e-09 |                       |  |
| 9.47340513101486e-09  | 99.8817267888823     | 99.7230170539087      |  |
| CEBPB-regulon         | Memory 1             |                       |  |
| 0.13918657191303      | -0.00405662504087309 |                       |  |
| 34578979              | 0.468097388520189    | 8.23453733384326e-06  |  |
| 1.11362314419595e-05  | 100                  | 100                   |  |
| CEBPG-regulon         | Memory 1             |                       |  |
| 0.0588506504215955    | -0.00956659587307642 | 29774762.5            |  |
| 0.403062466652322     | 8.04738216953371e-42 |                       |  |
| 2.38068389182039e-41  | 100                  | 100                   |  |
| CLOCK-regulon         | Memory 1             |                       |  |
| 0.0165715258445797    |                      | 0.00101460950074744   |  |
| 38123794              | 0.516083728553166    | 0.016744072800982     |  |
| 0.0194890027683561    | 53.9917208752218     | 50.9808858876044      |  |
| CREB1-regulon         | Memory 1             |                       |  |
| 0.0474696750120323    |                      | 0.00467260996319931   |  |
| 43558026              | 0.589647202125155    | 5.12305316643335e-36  |  |
| 1.37259160308214e-35  | 100                  | 99.9931326542291      |  |
| CREB3-regulon         | Memory 1             |                       |  |
| 0.233898418238886     | -0.00613003977267668 | 34319996.5            |  |
| 0.464591529312419     | 7.45942592594412e-07 |                       |  |
| 1.02838687522725e-06  | 100                  | 100                   |  |
| CREB3L2-regulon       | Memory 1             |                       |  |
| 0.124659283409104     | -0.00219990185691583 | 40999152.5            |  |
| 0.555007602069192     | 1.49040024935194e-14 |                       |  |
| 2.54984139045753e-14  | 100                  | 100                   |  |

|                      |                    |                       |                      |                     |
|----------------------|--------------------|-----------------------|----------------------|---------------------|
| CREB3L4-regulon      | Memory 1           |                       |                      |                     |
| 0.0102554650159618   |                    | -0.000878622699979249 |                      | 36183738.5          |
| 0.4898210990772      | 0.0836613061172534 |                       | 0.0935425627452755   |                     |
| 29.4500295683028     | 31.4203960169394   |                       |                      |                     |
| CREB5-regulon        | Memory 1           |                       |                      |                     |
| 0.035923746161122    |                    | -0.00337639255528517  |                      | 35607032.5          |
| 0.482014200772194    |                    | 0.0119419344478051    |                      | 0.0141312890965693  |
|                      | 99.8225901833235   | 99.6154286368319      |                      |                     |
| CREM-regulon         | Memory 1           |                       |                      |                     |
| 0.145884209258168    |                    | -0.00427464956029369  |                      | 30374464.5          |
| 0.411180662972992    |                    | 2.18905440470717e-35  |                      |                     |
| 5.75640232348923e-35 | 100                | 100                   |                      |                     |
| CTCF-regulon         | Memory 1           |                       |                      |                     |
| 0.366139309685066    |                    | -0.00488291048598155  |                      | 33636095            |
| 0.455333520099508    |                    | 4.29295006614673e-10  |                      |                     |
| 6.62607510209605e-10 | 100                | 100                   |                      |                     |
| CUX1-regulon         | Memory 1           |                       |                      |                     |
| 0.366139309685066    |                    | -0.00488291048598155  |                      | 33636095            |
| 0.455333520099508    |                    | 4.29295006614673e-10  |                      |                     |
| 6.62607510209605e-10 | 100                | 100                   |                      |                     |
| CUX1-regulon         | Memory 1           |                       |                      |                     |
| 0.0776680747091794   |                    |                       |                      | 0.00100755722203866 |
| 40947254.5           |                    | 0.554305056217002     |                      |                     |
| 3.19511071790667e-14 |                    | 5.33771437579702e-14  |                      | 100 100             |
| DDIT3-regulon        | Memory 1           |                       |                      |                     |
| 0.0806538429488696   |                    | -0.00441896309830397  |                      | 33315187.5          |
| 0.450989379033153    |                    | 7.3766276735597e-12   |                      | 1.1769450894893e-11 |
|                      | 100                | 100                   |                      |                     |
| E2F1-regulon         | Memory 1           |                       |                      |                     |
| 0.416856052588706    |                    |                       |                      | -0.0216455268478831 |
| 28674609.5           |                    | 0.388169639820371     |                      |                     |
| 4.51877292723919e-55 |                    | 1.64529680940504e-54  |                      | 100 100             |
| E2F2-regulon         | Memory 1           |                       |                      |                     |
| 0.0518823504078892   |                    | -0.00211755510283239  |                      | 36573782            |
| 0.495101137674038    |                    | 0.493528255407165     |                      | 0.511540235531514   |
|                      | 100                | 100                   |                      |                     |
| E2F3-regulon         | Memory 1           |                       |                      |                     |
| 0.0213781923119917   |                    |                       |                      |                     |
| 0.000273066148122555 |                    | 37986423.5            | 0.514224137143318    |                     |
| 0.0468015326654761   |                    | 0.0531665411079808    | 100                  | 100                 |
| E2F4-regulon         | Memory 1           |                       |                      |                     |
| 0.37582257950443     |                    | -0.0237188586110978   |                      |                     |
| 26666985             | 0.360992325372216  |                       | 4.39204461157618e-84 |                     |
| 2.71161015149486e-83 | 100                | 100                   |                      |                     |
| E2F6-regulon         | Memory 1           |                       |                      |                     |
| 0.0595013789981437   |                    |                       |                      | -0.0133991794950249 |
| 27889158             | 0.377536943118735  |                       | 1.11736534701135e-65 |                     |
| 5.28886264252038e-65 | 100                | 100                   |                      |                     |
| E2F7-regulon         | Memory 1           |                       |                      |                     |
| 0.0339640130976732   |                    |                       |                      | 0.00352120860902794 |
| 45754366             | 0.619379167846364  |                       | 1.67099869318228e-62 |                     |
| 7.19035801308738e-62 | 100                | 100                   |                      |                     |
| E2F8-regulon         | Memory 1           |                       |                      |                     |
| 0.0679080518765645   |                    | -0.00715520773848849  |                      | 28544321            |
| 0.386405917802893    |                    | 9.15583923697586e-57  |                      |                     |
| 3.42139255697519e-56 | 100                | 100                   |                      |                     |
| EGR1-regulon         | Memory 1           |                       |                      |                     |
| 0.0466755921666811   |                    | -0.000817896010616839 |                      | 35385176.5          |
| 0.479010924873633    |                    | 0.0033503400587518    |                      | 0.00410127834778238 |
|                      | 100                | 100                   |                      |                     |

|                       |                   |                       |                       |                     |
|-----------------------|-------------------|-----------------------|-----------------------|---------------------|
| EGR2-regulon          | Memory 1          |                       |                       |                     |
| 0.0427975352968383    |                   | -0.00337619193260746  |                       | 33729214.5          |
| 0.456594083483126     |                   | 1.30484987078271e-09  |                       |                     |
| 1.97115618777814e-09  |                   | 100                   | 99.9954217694861      |                     |
| EGR3-regulon          | Memory 1          |                       |                       |                     |
| 0.0387353431698709    |                   | -0.00284169961341336  |                       | 34062263.5          |
| 0.461102584649377     |                   | 5.4291599355235e-08   |                       |                     |
| 7.70940710844337e-08  |                   | 100                   | 99.9954217694861      |                     |
| ELF1-regulon          | Memory 1          | 0.704460994408036     |                       | -0.0026836558793023 |
| 38336043              | 0.518956954006585 |                       | 0.00805888748431649   |                     |
| 0.00969798324383849   | 100               | 100                   |                       |                     |
| ELF2-regulon          | Memory 1          | 0.0403358875621291    |                       | 0.00797710343646459 |
| 47458545              | 0.642448725205792 |                       | 3.33916959501722e-88  |                     |
| 2.49558990785497e-87  |                   | 99.9408633944412      | 99.5192857960398      |                     |
| ELF4-regulon          | Memory 1          | 0.0226571501834917    |                       | 0.00437301479252373 |
| 45511406.5            |                   | 0.616090212800405     |                       |                     |
| 3.31129651136744e-59  |                   | 1.30612251281716e-58  |                       | 99.8225901833235    |
| 98.2785853267712      |                   |                       |                       |                     |
| ELK1-regulon          | Memory 1          | 0.0662568127722245    |                       |                     |
| 0.000209654512982563  |                   | 37042926.5            | 0.501451970510618     |                     |
| 0.839182348682212     |                   | 0.839182348682212     | 100                   | 100                 |
| ELK3-regulon          | Memory 1          | 0.0775980321246631    |                       | 0.0131838921807649  |
| 52620982              | 0.712332896109161 |                       | 1.49667802349722e-193 |                     |
| 7.08427597788682e-192 |                   | 100                   | 100                   |                     |
| ELK4-regulon          | Memory 1          | 0.0459637141884334    |                       | 0.00100410002822406 |
| 38174206.5            |                   | 0.516766165116686     |                       | 0.0191073696294636  |
| 0.0220589145315759    |                   | 97.2797161442933      | 96.7082522605013      |                     |
| ESRRA-regulon         | Memory 1          | 0.0816779417800863    |                       | -0.0104471098345089 |
| 30116498.5            |                   | 0.40768856417716      | 4.37021476327304e-38  |                     |
| 1.19340480073995e-37  |                   | 100                   | 100                   |                     |
| ETS1-regulon          | Memory 1          | 0.247696289872888     |                       | 0.00494143346978934 |
| 43125422.5            |                   | 0.583791026654656     |                       |                     |
| 1.11446763277675e-31  |                   | 2.51197466435395e-31  | 100                   | 100                 |
| ETV2-regulon          | Memory 1          | 0.0310386223711019    |                       | 0.00253091467397989 |
| 42598347.5            |                   | 0.576655985708123     |                       |                     |
| 8.73783060876838e-27  |                   | 1.8799574946138e-26   | 100                   | 100                 |
| ETV3-regulon          | Memory 1          | 0.0122613340966449    |                       |                     |
| 0.000864495163845442  |                   | 39000927              | 0.527957522359654     |                     |
| 9.03645207776226e-05  |                   | 0.000116652381367476  |                       | 86.6942637492608    |
| 84.2577543779329      |                   |                       |                       |                     |
| ETV5-regulon          | Memory 1          | 0.0338515013721027    |                       | 0.00040287280745633 |
| 38307827.5            |                   | 0.518574999355298     |                       | 0.00942591821530002 |
| 0.0112477343409462    |                   | 100                   | 100                   |                     |
| ETV6-regulon          | Memory 1          | 0.477039082085373     |                       | 0.0181402071458427  |
| 51635580              | 0.698993459370945 |                       | 3.0114912779024e-170  |                     |
| 7.12719602436901e-169 |                   | 100                   | 100                   |                     |
| ETV7-regulon          | Memory 1          | 0.0714374071872933    |                       | 0.00764627688856276 |
| 50581736.5            |                   | 0.684727526583891     |                       |                     |
| 5.40209444526252e-147 |                   | 9.58871764034097e-146 | 100                   | 100                 |
| FLI1-regulon          | Memory 1          | 0.162231140000031     |                       | 0.0190079834633682  |

|                       |                      |                       |  |                       |
|-----------------------|----------------------|-----------------------|--|-----------------------|
|                       | 52697401             | 0.713367383979185     |  | 2.01792905670376e-195 |
| 1.43272963025967e-193 | 100                  | 100                   |  |                       |
| FOS-regulon           | Memory 1             | 0.0915616855662657    |  | 0.00548870520146308   |
|                       | 46484766.5           | 0.62926663637526      |  | 5.74993394510488e-73  |
| 2.91603792930319e-72  | 100                  | 100                   |  |                       |
| FOSB-regulon          | Memory 1             | 0.0448344635572429    |  | 0.00349108167647573   |
|                       | 41356114             | 0.559839807957985     |  | 6.07567061368227e-17  |
| 1.0784315339286e-16   |                      | 99.9408633944412      |  | 99.2995307313723      |
| FOSL1-regulon         | Memory 1             |                       |  |                       |
|                       | 0.0525085459649091   | -0.00860587044947174  |  | 31938206.5            |
|                       | 0.432349117556898    | 3.21506284638348e-21  |  |                       |
| 6.16944492143857e-21  | 100                  | 100                   |  |                       |
| FOX01-regulon         | Memory 1             | 0.018151246546934     |  | 0.00151055437191484   |
|                       | 38422982.5           | 0.520133858417477     |  | 0.00288264702103629   |
|                       | 0.00355944240858394  | 55.4109994086339      |  | 52.22387547213        |
| FOX03-regulon         | Memory 1             |                       |  |                       |
|                       | 0.0142332826623249   | -0.00572394066323638  |  | 33412174              |
|                       | 0.452302290191452    | 4.66010397271809e-13  |  |                       |
| 7.60614671409159e-13  |                      | 39.4441159077469      |  | 47.043607645645       |
| GABPA-regulon         | Memory 1             | 0.0266262262309067    |  | 0.00118236157972437   |
|                       | 40103947.5           | 0.542889166684208     |  |                       |
| 2.04020705136536e-09  |                      | 2.98669485869981e-09  |  | 100 100               |
| GTF2B-regulon         | Memory 1             |                       |  |                       |
|                       | 0.0731778659803316   | -0.00610668888852897  |  | 30627796              |
|                       | 0.414610024307805    | 7.78835603079818e-33  |  |                       |
| 1.87448568876838e-32  | 100                  | 100                   |  |                       |
| HINFP-regulon         | Memory 1             | 0.0164929797910091    |  |                       |
|                       | 0.000272592221024333 | 37238545              |  | 0.504100068043985     |
|                       | 0.556629433430131    | 0.572763619906367     |  | 63.4535777646363      |
| 63.225363397047       |                      |                       |  |                       |
| HIVEP3-regulon        | Memory 1             | 0.0865147514481661    |  | 0.00916845944835923   |
|                       | 43845201.5           | 0.593534711400572     |  |                       |
| 4.68224870033548e-39  |                      | 1.30368493225027e-38  |  | 99.9408633944412      |
| 99.6841020945405      |                      |                       |  |                       |
| HOXB2-regulon         | Memory 1             |                       |  |                       |
|                       | 0.0362306423476039   | -0.000905839552624368 |  | 37420165.5            |
|                       | 0.506558673943012    | 0.358263570293966     |  | 0.382506969787543     |
|                       | 86.0437610881135     | 83.6396932585556      |  |                       |
| IKZF1-regulon         | Memory 1             | 0.145087493052685     |  | 0.00127071495637665   |
|                       | 38679284.5           | 0.523603431561106     |  |                       |
| 0.000970209432936968  |                      | 0.00121920123431017   |  | 100 100               |
| IRF1-regulon          | Memory 1             | 0.143199466110083     |  | 0.00805728840086628   |
|                       | 48296838.5           | 0.653796746735388     |  |                       |
| 1.69666492369627e-102 |                      | 1.50579011978044e-101 |  | 100 100               |
| IRF2-regulon          | Memory 1             | 0.0911379421937043    |  | 0.00635432349964388   |
|                       | 44557986             | 0.603183711246047     |  | 3.76941727340411e-47  |
| 1.1636027235291e-46   | 100                  | 100                   |  |                       |
| IRF3-regulon          | Memory 1             | 0.153150103737944     |  | 0.00800177213427275   |
|                       | 50114373.5           | 0.67840081000296      |  | 3.11442689591509e-137 |
| 3.68540516016619e-136 | 100                  | 100                   |  |                       |

|                       |          |                       |                       |                     |
|-----------------------|----------|-----------------------|-----------------------|---------------------|
| IRF4-regulon          | Memory 1 |                       |                       |                     |
| 0.0566107888321154    |          | -0.00187129775455584  |                       | 36668999            |
| 0.496390095021296     |          | 0.613873727225154     |                       | 0.622643351899799   |
| 100                   |          | 99.9954217694861      |                       |                     |
| IRF5-regulon          | Memory 1 |                       |                       |                     |
| 40956340.5            |          | 0.55442805385878      | 2.24410066999436e-14  | 0.00594998613312915 |
| 3.79359875165713e-14  |          | 90.1833234772324      | 80.1030101865629      |                     |
| IRF7-regulon          | Memory 1 |                       |                       |                     |
| 50162470.5            |          | 0.679051901525808     |                       | 0.00909600195148359 |
| 3.19543769927212e-138 |          | 4.12501957542401e-137 | 100                   | 100                 |
| IRF8-regulon          | Memory 1 |                       |                       |                     |
| 42548402.5            |          | 0.575979877715761     |                       | 0.00290870200896071 |
| 2.41524435717286e-26  |          | 5.11887610027682e-26  | 100                   | 100                 |
| IRF9-regulon          | Memory 1 |                       |                       |                     |
| 44024086              |          | 0.59595627992915      | 5.16357059372498e-41  |                     |
| 1.49638168226316e-40  |          | 100                   | 100                   |                     |
| JUN-regulon           | Memory 1 |                       |                       |                     |
| 45093997.5            |          | 0.610439726045292     |                       | 0.00663496173075061 |
| 9.36725722344743e-54  |          | 3.24426957495008e-53  | 100                   | 100                 |
| JUNB-regulon          | Memory 1 |                       |                       |                     |
| 47197925              |          | 0.63892069907766      | 5.56517659633219e-84  |                     |
| 3.16102030671668e-83  |          | 100                   | 100                   |                     |
| JUND-regulon          | Memory 1 |                       |                       |                     |
| 42457105              |          | 0.574743978838341     | 1.51414172515531e-25  | 0.00282357245998895 |
| 3.16188419076549e-25  |          | 100                   | 100                   |                     |
| KLF11-regulon         | Memory 1 |                       |                       |                     |
| 39680941              |          | 0.537162906288346     | 5.46451663256939e-09  | 0.00443840586928437 |
| 7.91797307984545e-09  |          | 47.2501478415139      | 40.6111937736065      |                     |
| KLF12-regulon         | Memory 1 |                       |                       |                     |
| 40256768              |          | 0.544957905525871     | 3.30550088775916e-10  | 0.00358526512793576 |
| 5.15803435232748e-10  |          | 99.7043169722058      | 98.5601465033764      |                     |
| KLF13-regulon         | Memory 1 |                       |                       |                     |
| 48346055.5            |          | 0.654462999754912     |                       | 0.00422821993795067 |
| 2.27247126813289e-103 |          | 2.15127280049914e-102 | 100                   | 100                 |
| KLF2-regulon          | Memory 1 |                       |                       |                     |
| 56040051              |          | 0.758617006177024     | 4.20334400247474e-286 | 0.0215691045472405  |
| 5.96874848351413e-284 |          | 100                   | 100                   |                     |
| KLF3-regulon          | Memory 1 |                       |                       |                     |
| 47018590              |          | 0.636493032107786     | 3.88489440524527e-81  | 0.0143238122475104  |
| 2.12175002132626e-80  |          | 100                   | 99.8580748540689      |                     |
| KLF4-regulon          | Memory 1 |                       |                       |                     |
| 2.77998627474102e-05  |          | 37195023              | 0.503510908527645     |                     |
| 0.599569455114542     |          | 0.612509803066655     |                       | 50.7983441750443    |
| 49.7745221471901      |          |                       |                       |                     |
| KLF6-regulon          | Memory 1 |                       |                       |                     |
| 52496631.5            |          | 0.710649557098163     |                       | 0.0179867491792418  |
| 1.5813116680079e-190  |          | 5.61365642142805e-189 | 100                   | 100                 |
| KLF7-regulon          | Memory 1 |                       |                       |                     |
| 45494594              |          | 0.615862621137143     | 5.54901273838323e-59  | 0.0100227791708375  |
| 2.12962110500113e-58  |          | 99.8817267888823      | 97.4659494105528      |                     |

KLF8-regulon Memory 1 0.0394442362508596 0.0148925024556783  
 50303383 0.680959441168892 1.03017982446413e-142  
 1.62539483415452e-141 93.4949733885275 77.0218610507039  
 MAFB-regulon Memory 1 0.0576496840036503 0.00193903964551091  
 40147898 0.543484126826732 1.21894438390277e-09  
 1.86118389800208e-09 100 99.9977108847431  
 MAFF-regulon Memory 1 0.0149550571803947 0.00266752545410287  
 38760452 0.524702200115918 1.47693659665013e-05  
 1.9785377049464e-05 32.8208160851567 28.3804509557056  
 MAFG-regulon Memory 1 0.0262352007456857  
 0.000859893200703211 37665785 0.509883637543575  
 0.151799721311518 0.165812003278735 60.3784742755766  
 58.532677120293  
 MAX-regulon Memory 1 0.206670866991404 0.00934906290502149  
 51694748 0.699794419581019 1.32457212244692e-171  
 3.76178482774925e-170 100 100  
 MAZ-regulon Memory 1  
 0.130727189148534 -0.00579248916453165 29744261.5  
 0.402649573071882 3.66042083989048e-42  
 1.10591438141372e-41 100 100  
 MEF2A-regulon Memory 1 0.0458004467541717 0.00524146188836162  
 44580326.5 0.603486135725041  
 2.04116841620308e-47 6.44102033557417e-47 100  
 99.9977108847431  
 MLX-regulon Memory 1 0.055588352927253 0.00276597299255444  
 40593921.5 0.549521969516322  
 4.46465897918846e-12 7.20433608005411e-12 100  
 99.9885544237152  
 MXD4-regulon Memory 1  
 0.0834186211632023 -0.00908923127119934 39733549.5  
 0.537875070214989 1.1728313367671e-07  
 1.64893118634582e-07 92.3122412773507 88.460569989699  
 MXI1-regulon Memory 1 0.0701652801464298 0.00512678538869384  
 42244846 0.571870618014417 9.63732126026535e-24  
 1.92746425205307e-23 100 100  
 MYBL1-regulon Memory 1 0.0233818874214 -0.00676026210918884  
 36087334 0.488516066482351 0.107071336319794  
 0.11786147098768 83.6191602602011 79.9221700812636  
 MYC-regulon Memory 1 0.289328526557362 -0.0265423710564726  
 28969810.5 0.392165790695403  
 2.47980303077996e-51 8.18911698536639e-51 100 100  
 NFATC1-regulon Memory 1 0.0381182426580962 -0.0128795748339118  
 30004592.5 0.40617368699239 2.70492731289071e-39  
 7.68199356860962e-39 92.9036073329391 94.9021403227652  
 NFE2L1-regulon Memory 1 0.159592173089926 -0.0239681770345664  
 32474540 0.439609491286437 3.15396044184793e-17  
 5.66914408534692e-17 100 99.9336156575484  
 NFE2L2-regulon Memory 1 0.103629506734009 -0.0075317012225333  
 31509326.5 0.426543347294319  
 9.92856479997555e-25 2.04326985738627e-24 100 100

|                       |          |                       |                   |                       |
|-----------------------|----------|-----------------------|-------------------|-----------------------|
| NFKB1-regulon         | Memory 1 |                       |                   |                       |
| 0.0518270696449834    |          | -0.00502914512042642  |                   | 35033861              |
| 0.474255149172544     |          | 0.000320267179657026  |                   |                       |
| 0.000406053031350873  |          | 100                   | 99.9290374270344  |                       |
| NFKB2-regulon         | Memory 1 | 0.0778292263661702    |                   | 0.00462499014135852   |
| 43317870.5            |          | 0.586396204969086     |                   | 1.4228611765617e-33   |
| 3.60796941199573e-33  |          | 100                   | 100               |                       |
| NFYA-regulon          | Memory 1 | 0.0233305179753796    |                   | 0.00247432091002284   |
| 42016850.5            |          | 0.568784231393679     |                   |                       |
| 6.98492177459192e-22  |          | 1.35871081094802e-21  |                   | 99.7043169722058      |
| 98.9905001716836      |          |                       |                   |                       |
| NFYB-regulon          | Memory 1 | 0.0963982388746582    |                   | -0.0126999387904567   |
| 23971183.5            |          | 0.324499124051298     |                   |                       |
| 7.14582086766003e-133 |          | 7.24790402291232e-132 |                   | 100 100               |
| NFYC-regulon          | Memory 1 |                       |                   |                       |
| 0.0789857478242881    |          | -0.00472507754227552  |                   | 30427218              |
| 0.411894789771973     |          | 7.58029642018676e-35  |                   |                       |
| 1.95709471212095e-34  |          | 100                   | 100               |                       |
| NR1H3-regulon         | Memory 1 | 0.0105974931816127    |                   | 0.00214296552660217   |
| 38541302.5            |          | 0.521735562244814     |                   |                       |
| 2.87136074493117e-05  |          | 3.7753076461132e-05   |                   | 26.0792430514488      |
| 21.9503261989241      |          |                       |                   |                       |
| NR2C2-regulon         | Memory 1 | 0.0270865161105466    |                   | 0.00550551846707224   |
| 42712770.5            |          | 0.578204935649261     |                   |                       |
| 3.52896280662189e-28  |          | 7.70942643908167e-28  |                   | 84.6836191602602      |
| 75.6415245507611      |          |                       |                   |                       |
| NR3C1-regulon         | Memory 1 | 0.235481247242272     |                   | 0.0103908930284868    |
| 49940197              |          | 0.676042973908621     |                   | 1.10740038718067e-133 |
| 1.20962196138196e-132 |          | 100                   | 100               |                       |
| NRF1-regulon          | Memory 1 | 0.0272978986033293    |                   |                       |
| 0.000590747680615712  |          | 39033905              | 0.528403947214437 |                       |
| 7.18758979599594e-05  |          | 9.36364909203141e-05  |                   | 100                   |
| 99.9656632711457      |          |                       |                   |                       |
| PAX5-regulon          | Memory 1 | 0.105897963333955     |                   | 0.00584822661567609   |
| 43265377              |          | 0.585685597803262     |                   | 4.73619954976827e-33  |
| 1.15955230356396e-32  |          | 100                   | 100               |                       |
| POU2F1-regulon        | Memory 1 | 0.00521557210429092   |                   |                       |
| 0.000348581612405605  |          | 37616972              | 0.509222853492495 |                       |
| 0.0561602232985761    |          | 0.0632916802253794    |                   | 19.9881726788882      |
| 18.2831635572851      |          |                       |                   |                       |
| POU6F1-regulon        | Memory 1 | 0.0375813773036258    |                   | 0.00683392312634582   |
| 41624101.5            |          | 0.563467568306434     |                   | 1.2900828943739e-19   |
| 2.41041803948808e-19  |          | 73.4476641040804      |                   | 65.0406317958109      |
| REL-regulon           | Memory 1 |                       |                   |                       |
| 0.258701857025966     |          | -0.00520406161694126  |                   | 32694332.5            |
| 0.442584833481079     |          | 1.01644537963234e-15  |                   |                       |
| 1.76018590131454e-15  |          | 100                   | 100               |                       |
| RELA-regulon          | Memory 1 | 0.0975211783166015    |                   | 0.00566794036372426   |
| 47441275              |          | 0.64221494034188      |                   | 6.40719182574827e-88  |
| 4.54910619628127e-87  |          | 100                   | 100               |                       |



RELB-regulon Memory 1  
 0.0989254659114843 -0.00650046168359579 27992574  
 0.378936890743886 3.15769800127072e-64  
 1.40122848806388e-63 100 100  
 REST-regulon Memory 1 0.226756089757294 0.00845261622168492  
 50349555 0.68158447386933 4.20751479867747e-142  
 5.97467101412201e-141 100 100  
 RFX5-regulon Memory 1 0.066849954403977 0.00155960061050424  
 43175321.5 0.584466511942691  
 3.64331301211193e-32 8.481154880654e-32 100 100  
 RXRA-regulon Memory 1 0.0146905003794419  
 0.000166569039669783 37390587 0.506158268291753  
 0.378277158559726 0.400860869518516 65.1685393258427  
 64.2279958795925  
 SETDB1-regulon Memory 1  
 0.0595799209303088 -0.000142932569100099 36826728.5  
 0.498525287244369 0.836688678838646 0.839182348682212  
 94.2637492607924 95.0829804280646  
 SOX5-regulon Memory 1 0.00983836277643753 0.00211383423940743  
 38379481.5 0.519544983179199  
 0.000186327571487963 0.000238365001362979 25.7835600236546  
 22.3669451756896  
 SP1-regulon Memory 1 0.0149580488322778 0.00204020623717699  
 40177574 0.543885852340424 2.25304272687351e-10  
 3.55480074684487e-10 66.7060910703726 59.5559116401511  
 SP2-regulon Memory 1  
 0.0277405441658109 -0.000518952371214479 35646446  
 0.482547743316132 0.0147164483759533 0.0172705427221931  
 100 100  
 SP3-regulon Memory 1 0.0318775157288466 0.00374726238514814  
 46509728 0.629604541463884 2.44042635597069e-73  
 1.28348349091792e-72 100 100  
 SP4-regulon Memory 1 0.00992666879436827 0.00133863041150851  
 38298524 0.518449057405014 0.00129345896535656  
 0.00161115064105817 32.2885866351271 28.8886345427492  
 SPI1-regulon Memory 1 0.430555300711557 0.0124773072990722  
 45654717 0.618030214290834 3.85844630120132e-61  
 1.56542678505882e-60 100 100  
 SPIB-regulon Memory 1  
 0.560154508292411 -0.00446303293410211 33044402.5  
 0.447323748785642 1.80492754169869e-13 2.9802291967583e-13  
 100 100  
 SREBF1-regulon Memory 1 0.0449700828356721 0.004196594701636  
 41681973.5 0.564250984498926  
 2.69714548867391e-19 4.97395661547656e-19 97.043169722058  
 96.8890923658006  
 SREBF2-regulon Memory 1 0.104814035637188 0.00605712900153968  
 47202369 0.638980857730539 4.72468170006405e-84  
 2.79543667253789e-83 100 100  
 SRF-regulon Memory 1 0.0233233747937771 0.00265306895359621

|                      |                      |                       |                      |                      |     |
|----------------------|----------------------|-----------------------|----------------------|----------------------|-----|
|                      | 41883133             | 0.566974090829684     |                      | 7.90308397153185e-21 |     |
| 1.49631723194336e-20 |                      | 98.9355410999409      | 97.89630307886       |                      |     |
| STAT1-regulon        | Memory 1             | 0.0847148069594519    |                      | 0.0051377626107508   |     |
|                      | 46257722             | 0.626193123489646     |                      | 1.2610463956444e-69  |     |
| 6.17477890281053e-69 |                      | 100                   | 100                  |                      |     |
| STAT2-regulon        | Memory 1             | 0.0684685427999388    |                      | 0.00232067120857277  |     |
|                      | 39397758             | 0.53332944368746      | 3.18644434804149e-06 |                      |     |
| 4.35072209059511e-06 |                      | 100                   | 99.9610850406318     |                      |     |
| STAT5A-regulon       | Memory 1             |                       |                      |                      |     |
|                      | 0.065260264580662    | -0.00659327123076443  |                      | 30903580             |     |
| 0.41834332627128     | 3.59815036149544e-30 |                       | 7.98339611456801e-30 |                      | 100 |
|                      | 100                  |                       |                      |                      |     |
| TBP-regulon          | Memory 1             | 0.0210789548422794    |                      | 0.00018456776749335  |     |
|                      | 37332178.5           | 0.505367589471613     |                      | 0.422312607190593    |     |
|                      | 0.444210297933809    |                       | 50.7983441750443     | 49.8500629506696     |     |
| TCF12-regulon        | Memory 1             | 0.0119639675674613    |                      | 0.00303329419576482  |     |
|                      | 39368219.5           | 0.532929579518226     |                      |                      |     |
| 1.60055610246168e-09 |                      | 2.39241017420588e-09  |                      | 31.0467179183915     |     |
| 24.9948494906719     |                      |                       |                      |                      |     |
| TFDP1-regulon        | Memory 1             | 0.50888577998557      | -0.0200237347427396  |                      |     |
|                      | 26240755             | 0.355222428293735     |                      | 4.77652454073332e-91 |     |
| 3.98980285167136e-90 |                      | 100                   | 100                  |                      |     |
| TFDP2-regulon        | Memory 1             |                       |                      |                      |     |
|                      | 0.0267061476368906   | -0.000433147946001515 |                      | 37530607             |     |
| 0.508053726117174    |                      | 0.260309484995818     |                      | 0.280029900525804    |     |
|                      | 99.9408633944412     | 99.9977108847431      |                      |                      |     |
| TFEC-regulon         | Memory 1             | 0.0964921778073385    |                      | 0.00514226614612524  |     |
|                      | 43191605.5           | 0.584686949274709     |                      |                      |     |
| 2.52466430974802e-32 |                      | 5.97503886640365e-32  |                      | 100                  | 100 |
| THAP1-regulon        | Memory 1             | 0.0380743197695079    |                      |                      |     |
|                      | 0.000944401159772727 | 39154393.5            | 0.530035006136007    |                      |     |
| 2.69329633896548e-05 |                      | 3.57428112273924e-05  |                      | 100                  | 100 |
| THAP11-regulon       | Memory 1             | 0.181387203039689     |                      | 0.00302211648907955  |     |
|                      | 42277062             | 0.57230672763664      | 5.18383907059086e-24 |                      |     |
| 1.05157878289129e-23 |                      | 100                   | 100                  |                      |     |
| TP53-regulon         | Memory 1             |                       |                      |                      |     |
|                      | 0.0893924363105866   | -0.00931125269442681  |                      | 27924274.5           |     |
| 0.378012316956232    |                      | 3.48995959546867e-65  |                      |                      |     |
| 1.59862665340823e-64 |                      | 100                   | 100                  |                      |     |
| USF2-regulon         | Memory 1             | 0.132144529767724     |                      | 0.00712380312899275  |     |
|                      | 47585691.5           | 0.644169913810276     |                      |                      |     |
| 2.66534492292548e-90 |                      | 2.10266099475232e-89  |                      | 100                  | 100 |
| XBP1-regulon         | Memory 1             | 0.196043664567344     |                      |                      |     |
|                      | 0.000782976649378458 | 44852348              | 0.607168504535623    |                      |     |
| 1.00981192950643e-50 |                      | 3.25893849977075e-50  |                      | 100                  | 100 |
| YBX1-regulon         | Memory 1             | 0.0919794684400941    |                      | -0.0033283283530272  |     |
|                      | 30567541.5           | 0.413794356092251     |                      |                      |     |
| 1.96623233921421e-33 |                      | 4.89833319593715e-33  |                      | 100                  | 100 |
| YY1-regulon          | Memory 1             | 0.62694461856428      | -0.0130116094409021  |                      |     |
| 28962104.5           |                      | 0.392061474183457     |                      | 1.98846543735104e-51 |     |

|                      |                      |                      |                      |
|----------------------|----------------------|----------------------|----------------------|
| 6.72290695485353e-51 | 100                  | 100                  |                      |
| YY2-regulon          | Memory 1             | 0.057467541112343    | 0.00671575617994892  |
|                      | 41339656             | 0.559617015179163    | 7.67497120050232e-17 |
| 1.34548877835967e-16 | 94.9733885274985     | 90.3582465377132     |                      |
| ZBTB33-regulon       | Memory 1             | 0.374936316393466    | 0.00946295278560327  |
|                      | 45675851             | 0.618316306318276    | 1.98849535386458e-61 |
| 8.30489236025797e-61 | 100                  | 100                  |                      |
| ZNF143-regulon       | Memory 1             | 0.026475878848795    | 0.00326688816109869  |
|                      | 45142857             | 0.611101139569225    | 2.2256178686998e-54  |
| 7.90094343388431e-54 | 100                  | 99.9931326542291     |                      |
| ZNF274-regulon       | Memory 1             | 0.0692346246600355   | 0.00404379141442672  |
|                      | 43143211             | 0.584031830479306    | 7.48864707062285e-32 |
| 1.71514174843298e-31 | 100                  | 100                  |                      |
| ZNF76-regulon        | Memory 1             | 0.0155047091922372   |                      |
|                      | 0.000984283230952711 | 40105980             | 0.542916680739559    |
| 1.99247370471693e-09 | 2.94720068822712e-09 | 99.4677705499704     |                      |
| 99.4597687993591     |                      |                      |                      |
| ATF1-regulon         | Memory 2             |                      |                      |
|                      | 0.102651772960789    | -0.00375742540161711 | 42098469.5           |
|                      | 0.441677534847002    | 2.05328957290996e-20 |                      |
|                      | 3.31326271992289e-20 | 100                  | 100                  |
| ATF3-regulon         | Memory 2             |                      |                      |
|                      | 0.0476156593851464   | -0.00358034138031871 | 43891563             |
|                      | 0.460489836724869    | 3.54593820990759e-10 |                      |
|                      | 4.75021911138564e-10 | 100                  | 100                  |
| ATF4-regulon         | Memory 2             |                      |                      |
|                      | 0.104523728537579    | -0.00444416756033325 | 43602622             |
|                      | 0.457458402325663    | 1.43732432124041e-11 |                      |
|                      | 2.02079261006078e-11 | 100                  | 100                  |
| ATF5-regulon         | Memory 2             |                      |                      |
|                      | 0.110903594435036    | -0.00791499124845711 | 40931457             |
|                      | 0.429433783227109    | 3.92354943465326e-29 |                      |
|                      | 7.14287204770209e-29 | 100                  | 99.9976834692365     |
| ATF6-regulon         | Memory 2             |                      |                      |
|                      | 0.134552624544514    | -0.00195652568076635 | 53987318.5           |
|                      | 0.566409801384345    | 5.44264089011137e-26 |                      |
|                      | 9.66068757994769e-26 | 100                  | 100                  |
| ATF6B-regulon        | Memory 2             | 0.058634011702825    | 0.00140591208900521  |
|                      | 54936558.1015625     | 0.576368781180446    |                      |
|                      | 7.73365995945389e-34 | 1.44497330821375e-33 | 99.9547101449275     |
| 99.9189214232765     |                      |                      |                      |
| BACH1-regulon        | Memory 2             | 0.0484740919327763   | 0.00545678358650052  |
|                      | 55122534.5           | 0.578319958935296    |                      |
|                      | 1.69960604638016e-35 | 3.30608299432852e-35 | 100                  |
| 99.5413269088213     |                      |                      |                      |
| BATF-regulon         | Memory 2             | 0.0131116106642568   | -0.0064979325893957  |
|                      | 43027154             | 0.451420860090942    | 2.67438354422803e-16 |
|                      | 4.04002620511043e-16 | 44.8822463768116     | 52.0663454410675     |
| BATF3-regulon        | Memory 2             | 0.0677935936544815   | -0.0161561824887027  |
|                      | 35323119             | 0.370593712985867    | 8.51080123120205e-94 |

|                       |                       |                   |                      |
|-----------------------|-----------------------|-------------------|----------------------|
| 3.55451110244321e-93  | 100                   | 100               |                      |
| BCL11A-regulon        | Memory                | 2                 | 0.220550175851185    |
| 66651848.5            |                       |                   | 0.699280151704228    |
| 1.08811390142725e-219 | 1.71680193336299e-218 | 100               | 100                  |
| BHLHE40-regulon       | Memory                | 2                 | 0.0609151899141922   |
| 56664004.5            |                       |                   | 0.594492344243522    |
| 7.12148008988388e-51  | 1.77412311011142e-50  | 100               | 100                  |
| BRF2-regulon          | Memory                | 2                 |                      |
| 0.0380448110394954    | -0.00374999956755624  |                   | 41951181             |
| 0.440132252503868     | 2.00299634047046e-21  |                   |                      |
| 3.26925839479086e-21  | 99.5923913043478      | 99.7359154929577  |                      |
| CEBPB-regulon         | Memory                | 2                 |                      |
| 0.138022782621967     | -0.00532852501347786  |                   | 42347283             |
| 0.444287970205386     | 9.14559542591144e-19  |                   |                      |
| 1.42711489063673e-18  | 100                   | 100               |                      |
| CEBPG-regulon         | Memory                | 2                 | 0.0578478585645441   |
| 36464054              | 0.382563871621222     |                   | 1.39485340174582e-77 |
| 4.71593292971207e-77  | 100                   | 100               |                      |
| CLOCK-regulon         | Memory                | 2                 | 0.0160611384984345   |
| 0.000490267786820431  | 48786186              | 0.511841941595224 |                      |
| 0.0454204110703588    | 0.0499976617983795    |                   | 54.2119565217391     |
| 50.933561897702       |                       |                   |                      |
| CREB1-regulon         | Memory                | 2                 | 0.0466293742104347   |
| 54217777              | 0.568827664631477     |                   | 8.52703063704889e-28 |
| 1.53270677273537e-27  | 100                   | 99.9930504077094  |                      |
| CREB3-regulon         | Memory                | 2                 |                      |
| 0.234550972215748     | -0.00551752451388232  |                   | 45575643.5           |
| 0.478158424978983     | 0.000525002170762806  |                   | 0.0006061000670595   |
| 100                   | 100                   |                   |                      |
| CREB3L2-regulon       | Memory                | 2                 |                      |
| 0.125756835396691     | -0.00107255822902649  |                   | 55637332.5           |
| 0.583720979786758     | 2.57897295013001e-40  |                   |                      |
| 5.54869937755245e-40  | 100                   | 100               |                      |
| CREB3L4-regulon       | Memory                | 2                 | 0.0127502492519033   |
| 49386103              | 0.518135991350947     |                   | 0.000463607030853458 |
| 0.000544067755216455  | 34.2391304347826      | 31.1990363232024  |                      |
| CREB5-regulon         | Memory                | 2                 |                      |
| 0.0331844616391291    | -0.00629622598331132  |                   | 41721961             |
| 0.437727383021911     | 4.75552144531569e-23  |                   |                      |
| 8.13595235222684e-23  | 99.5471014492754      | 99.6270385470719  |                      |
| CREM-regulon          | Memory                | 2                 |                      |
| 0.143014429651403     | -0.00734241070881217  |                   | 33611205             |
| 0.352633108613063     | 4.62583964877336e-121 |                   |                      |
| 2.43284900046599e-120 | 100                   | 100               |                      |
| CTCF-regulon          | Memory                | 2                 |                      |
| 0.368095006073021     | -0.00288566218681074  |                   | 46521908.5           |
| 0.488086196640896     | 0.0585593020440193    |                   | 0.0634764953454256   |
| 100                   | 100                   |                   |                      |
| CUX1-regulon          | Memory                | 2                 |                      |
| 0.0766135224197752    | -8.88673887891184e-05 |                   | 50636381.5           |

|                       |                      |                       |                      |
|-----------------------|----------------------|-----------------------|----------------------|
| 0.531253331062126     | 6.98009152258002e-07 |                       |                      |
| 9.01066360187602e-07  | 100                  | 100                   |                      |
| DDIT3-regulon         | Memory 2             | 0.08025601068728      | -0.00489006763462052 |
| 42245997              | 0.443225324666822    | 1.99039795728837e-19  |                      |
| 3.14040566594388e-19  | 100                  | 100                   |                      |
| E2F1-regulon          | Memory 2             | 0.41708960037541      | -0.0216592701996917  |
| 36979552              | 0.387972236546664    | 9.06910470238214e-71  |                      |
| 2.92684742667787e-70  | 100                  | 100                   |                      |
| E2F2-regulon          | Memory 2             |                       |                      |
| 0.0523295860836938    | -0.00167280459233509 | 48820710.5            |                      |
| 0.512204156569614     | 0.0526738430545602   | 0.0575360439519042    |                      |
| 100                   | 100                  |                       |                      |
| E2F3-regulon          | Memory 2             | 0.0215263662171904    |                      |
| 0.000432089367194011  | 49563146             | 0.519993444050075     |                      |
| 0.00150225697144196   | 0.00170656391955806  | 100                   | 100                  |
| E2F4-regulon          | Memory 2             | 0.372762884982345     | -0.0272191215034274  |
| 31698531              | 0.332566223823202    | 1.08092748589358e-155 |                      |
| 9.0289237056993e-155  | 100                  | 100                   |                      |
| E2F6-regulon          | Memory 2             | 0.0583099974843684    | -0.0148119737724525  |
| 33141784              | 0.347708162111494    | 3.743137008351e-129   |                      |
| 2.12610182074337e-128 | 100                  | 100                   |                      |
| E2F7-regulon          | Memory 2             | 0.0322795040573547    | 0.00179271024536439  |
| 53982404.5            | 0.566358245985016    |                       |                      |
| 5.93752866618066e-26  | 1.0409000871576e-25  | 100                   | 100                  |
| E2F8-regulon          | Memory 2             |                       |                      |
| 0.0679203178213638    | -0.00722800849111968 | 36701420              |                      |
| 0.385054205141221     | 2.09562757364116e-74 |                       |                      |
| 6.92044454551267e-74  | 100                  | 100                   |                      |
| EGR1-regulon          | Memory 2             | 0.0488416856670487    | 0.00144919550242961  |
| 52439117              | 0.550166792313281    | 1.65622624428459e-15  |                      |
| 2.47562238619381e-15  | 100                  | 100                   |                      |
| EGR2-regulon          | Memory 2             |                       |                      |
| 0.0429081621289933    | -0.00330034148999467 | 43632862.5            |                      |
| 0.457775671567304     | 2.03177862207667e-11 |                       |                      |
| 2.82855455230281e-11  | 100                  | 99.9953669384729      |                      |
| EGR3-regulon          | Memory 2             |                       |                      |
| 0.0376190385457217    | -0.00404913561520936 | 41840186.5            |                      |
| 0.438967749904989     | 3.33342713992091e-22 |                       |                      |
| 5.56878416316199e-22  | 100                  | 99.9953669384729      |                      |
| ELF1-regulon          | Memory 2             | 0.701076818941126     | -0.0062730692428149  |
| 45472550              | 0.477076815992254    | 0.00027328930652933   |                      |
| 0.000328873572264109  | 100                  | 100                   |                      |
| ELF2-regulon          | Memory 2             | 0.0503189491539399    | 0.0185663261307441   |
| 74853503              | 0.785328090839564    | 0                     | 0                    |
| 99.5112120088955      |                      | 100                   |                      |
| ELF4-regulon          | Memory 2             | 0.0232452574962272    | 0.00504357646020397  |
| 60915546              | 0.639097537527798    | 4.52462716044273e-108 |                      |
| 2.00780330244646e-107 | 99.411231884058      | 98.2811341734618      |                      |
| ELK1-regulon          | Memory 2             |                       |                      |
| 0.0647745324955556    | -0.00134593199672182 | 45027983.5            |                      |

|                      |          |                      |                      |                       |
|----------------------|----------|----------------------|----------------------|-----------------------|
| 0.472412631328829    |          | 1.18737838539562e-05 |                      |                       |
| 1.49210381173609e-05 |          | 100                  | 100                  |                       |
| ELK3-regulon         | Memory 2 | 0.0752402969862147   |                      | 0.0108634576601761    |
|                      |          | 64743138             | 0.679254850110388    | 3.73933314897977e-178 |
| 4.8271391559557e-177 |          | 100                  | 100                  |                       |
| ELK4-regulon         | Memory 2 | 0.0490705031683292   |                      | 0.0042818237232376    |
|                      |          | 51854819.5           | 0.544036615076855    |                       |
| 2.71825907669397e-12 |          | 3.93870192745453e-12 |                      | 98.4148550724638      |
| 96.6433469236471     |          |                      |                      |                       |
| ESRRA-regulon        | Memory 2 | 0.0814755004516001   |                      | -0.0107850252696884   |
|                      |          | 38290399             | 0.401725032750373    | 6.99226135953887e-55  |
| 1.80527475100822e-54 |          | 100                  | 100                  |                       |
| ETS1-regulon         | Memory 2 | 0.249014085809825    |                      | 0.00638581425042123   |
|                      |          | 56824564.5           | 0.596176864983522    |                       |
| 1.22171014493656e-52 |          | 3.0979078675177e-52  |                      | 100 100               |
| ETV2-regulon         | Memory 2 | 0.0326539805526621   |                      | 0.00425920821857136   |
|                      |          | 59594422             | 0.625236919826549    | 5.69219352425444e-88  |
| 2.07254225754905e-87 |          | 100                  | 100                  |                       |
| ETV3-regulon         | Memory 2 | 0.0122154726791133   |                      |                       |
|                      |          | 0.000826641575951458 | 50011231             | 0.524694543176776     |
| 8.5600824089299e-05  |          | 0.000105698408875482 |                      | 85.9148550724638      |
| 84.2684395848777     |          |                      |                      |                       |
| ETV5-regulon         | Memory 2 | 0.0337348402995698   |                      |                       |
|                      |          | 0.000285069629505058 | 48732310.5           | 0.511276704941462     |
| 0.0733994420033792   |          | 0.078960005791514    |                      | 100 100               |
| ETV6-regulon         | Memory 2 | 0.480545876921689    |                      | 0.0220436265673373    |
|                      |          | 70797445             | 0.742773819391847    | 0 100 100             |
| ETV7-regulon         | Memory 2 | 0.0665561049771942   |                      | 0.0026068763155904    |
|                      |          | 56022029.5           | 0.587757041540097    |                       |
| 4.00927067114382e-44 |          | 9.03676881432417e-44 |                      | 100 100               |
| FLI1-regulon         | Memory 2 | 0.16590506588172     | 0.0230974754078194   |                       |
|                      |          | 72356200             | 0.759127550869673    | 0 0 100 100           |
| FOS-regulon          | Memory 2 | 0.0907628763971774   |                      | 0.00471477302328956   |
|                      |          | 58157541.5           | 0.610161838840298    |                       |
| 1.71412635226219e-68 |          | 5.40902093380512e-68 |                      | 100 100               |
| FOSB-regulon         | Memory 2 | 0.0512601996187911   |                      | 0.0102872985212577    |
|                      |          | 60809254             | 0.637982371368754    | 2.24269174275493e-106 |
| 9.6503705294303e-106 |          | 100                  | 99.2888250555967     |                       |
| FOSL1-regulon        | Memory 2 |                      |                      |                       |
|                      |          | 0.0519249137558606   | -0.00932242275998324 | 39972071.5            |
| 0.419368357390002    |          | 1.60945669473671e-37 |                      |                       |
| 3.26489786646589e-37 |          | 100                  | 100                  |                       |
| FOX01-regulon        | Memory 2 | 0.0205483068455114   |                      | 0.00404831300605419   |
|                      |          | 52773859             | 0.553678749472905    | 1.8022360668207e-19   |
| 2.87547776953414e-19 |          | 61.0960144927536     | 51.8949221645663     |                       |
| FOX03-regulon        | Memory 2 |                      |                      |                       |
|                      |          | 0.0184943388961257   | -0.00131348823685454 | 46805347              |
| 0.491059901372863    |          | 0.123476946399493    |                      | 0.129879454731318     |
|                      |          | 45.4710144927536     | 46.8263528539659     |                       |
| GABPA-regulon        | Memory 2 | 0.0264493261958532   |                      | 0.00101057379585975   |

|                       |                   |                       |                       |     |
|-----------------------|-------------------|-----------------------|-----------------------|-----|
|                       | 51055433.5        | 0.535649829474799     |                       |     |
| 1.51439617473184e-08  |                   | 1.9911505260363e-08   | 100                   | 100 |
| GTF2B-regulon         | Memory 2          |                       |                       |     |
| 0.0727940243522081    |                   | -0.00658330017172716  | 38731909              |     |
| 0.406357150039347     |                   | 5.3854490019173e-50   |                       |     |
| 1.31850647977975e-49  |                   | 100                   | 100                   |     |
| HINFP-regulon         | Memory 2          | 0.0170827226415701    |                       |     |
| 0.000895764519146205  |                   | 49074353.5            | 0.514865260792683     |     |
| 0.0154778314801381    |                   | 0.0173059218124378    | 65.036231884058       |     |
| 63.1416790214974      |                   |                       |                       |     |
| HIVEP3-regulon        | Memory 2          |                       |                       |     |
| 0.0736188279286228    |                   | -0.00427727192877184  | 44550020              |     |
| 0.467398060895886     |                   | 2.26659363652053e-07  |                       |     |
| 2.95281005858637e-07  |                   | 99.6829710144928      | 99.6942179392142      |     |
| HOXB2-regulon         | Memory 2          | 0.0437838639337602    | 0.00702287300400839   |     |
| 55199401              | 0.579126406453116 |                       | 2.40878857208773e-36  |     |
| 4.81757714417545e-36  |                   | 91.4402173913043      | 83.3348776871757      |     |
| IKZF1-regulon         | Memory 2          | 0.148118072914542     | 0.00447152461733086   |     |
| 57029882              | 0.598330960567946 |                       | 6.08298884034676e-55  |     |
| 1.59960076912822e-54  |                   | 100                   | 100                   |     |
| IRF1-regulon          | Memory 2          | 0.144462747250747     | 0.00948168293251053   |     |
| 64471281              | 0.676402653082396 |                       | 1.35531112891876e-172 |     |
| 1.6037848358872e-171  |                   | 100                   | 100                   |     |
| IRF2-regulon          | Memory 2          | 0.0937139134309851    | 0.00913815541477009   |     |
| 61333185.5            |                   | 0.643479216648336     |                       |     |
| 7.33940212424465e-115 |                   | 3.47398367214247e-114 | 100                   | 100 |
| IRF3-regulon          | Memory 2          | 0.152152576367605     | 0.00704905517348989   |     |
| 62697573.5            |                   | 0.657793740087598     |                       |     |
| 1.6589938232197e-138  |                   | 1.12179582331998e-137 | 100                   | 100 |
| IRF4-regulon          | Memory 2          |                       |                       |     |
| 0.0548330565732627    |                   | -0.00376237076967828  | 43781241              |     |
| 0.459332389682776     |                   | 1.07102725225648e-10  |                       |     |
| 1.46236413288866e-10  |                   | 100                   | 99.9953669384729      |     |
| IRF5-regulon          | Memory 2          | 0.0544871312376547    | 0.00782304491063734   |     |
| 53784956.5            |                   | 0.564286713529413     |                       |     |
| 1.25113793477898e-24  |                   | 2.16660471632458e-24  | 90.8967391304348      |     |
| 79.9457931801334      |                   |                       |                       |     |
| IRF7-regulon          | Memory 2          | 0.118211097641975     | 0.0109071450258862    |     |
| 67573109              | 0.708945587797859 |                       | 2.6283433399875e-241  |     |
| 4.66530942847781e-240 |                   | 100                   | 100                   |     |
| IRF8-regulon          | Memory 2          | 0.0819802556336336    |                       |     |
| 0.000217935784376552  |                   | 50410996              | 0.528888691368271     |     |
| 4.50746930919778e-06  |                   | 5.71482715987576e-06  | 100                   | 100 |
| IRF9-regulon          | Memory 2          | 0.0389256339023564    | 0.00526563921981543   |     |
| 59643469.5            |                   | 0.625751503352927     |                       |     |
| 1.11324667075404e-88  |                   | 4.16002703281772e-88  | 100                   | 100 |
| JUN-regulon           | Memory 2          | 0.097125686030694     | 0.00917169830952898   |     |
| 62722504.5            |                   | 0.658055304528113     |                       |     |
| 5.84708603592965e-139 |                   | 4.15143108551005e-138 | 100                   | 100 |
| JUNB-regulon          | Memory 2          | 0.171950249784595     | 0.0127901277198784    |     |

|                       |                      |                       |     |                       |
|-----------------------|----------------------|-----------------------|-----|-----------------------|
|                       | 63691709.5           | 0.668223751985838     |     |                       |
| 3.80548426777236e-157 |                      | 3.6025251068245e-156  | 100 | 100                   |
| JUND-regulon          | Memory 2             | 0.0413632611358769    |     | 0.00305419055792216   |
|                       | 55044124             | 0.577497312488585     |     | 8.63933250926179e-35  |
| 1.63571362175357e-34  |                      | 100                   | 100 |                       |
| KLF11-regulon         | Memory 2             | 0.0311771479601429    |     | 0.00971331061243029   |
|                       | 54731326             | 0.574215581556655     |     | 5.85704401564272e-40  |
| 1.24134365704667e-39  |                      | 52.8985507246377      |     | 40.2427724240178      |
| KLF12-regulon         | Memory 2             | 0.0471629839220571    |     |                       |
|                       | 0.000119157279924453 | 47912289.5            |     | 0.502673426530052     |
|                       | 0.671241425135885    | 0.676002002619118     |     | 99.411231884058       |
| 98.5614343958488      |                      |                       |     |                       |
| KLF13-regulon         | Memory 2             | 0.0713186929486918    |     | 0.00528369945669099   |
|                       | 65033188             | 0.682297919621083     |     | 3.49506389078142e-184 |
| 4.96299072490961e-183 |                      | 100                   | 100 |                       |
| KLF2-regulon          | Memory 2             | 0.13396230937478      |     | 0.026398495308037     |
|                       | 77285154             | 0.81083984060254      | 0   | 0                     |
|                       |                      |                       | 100 | 100                   |
| KLF3-regulon          | Memory 2             | 0.090492261534873     |     | 0.0194074105158366    |
|                       | 64047340.5           | 0.671954866804517     |     |                       |
| 4.20489380403053e-164 |                      | 4.26496371551668e-163 |     | 100                   |
| 99.8563750926612      |                      |                       |     |                       |
| KLF4-regulon          | Memory 2             | 0.0171781703411169    |     | 0.00134376651361553   |
|                       | 48897296.5           | 0.513007661212076     |     | 0.027138280557366     |
|                       | 0.0301065299933279   | 50.9963768115942      |     | 49.7521312083024      |
| KLF6-regulon          | Memory 2             | 0.0966588079587203    |     | 0.0286742209962231    |
|                       | 77399747.5           | 0.812042102233203     | 0   | 0                     |
|                       | 100                  |                       |     | 100                   |
| KLF7-regulon          | Memory 2             | 0.0598166638579935    |     | 0.0145246989960436    |
|                       | 63317925.5           | 0.664302184345825     |     |                       |
| 5.32045236446343e-150 |                      | 4.19724575418782e-149 |     | 99.8188405797101      |
| 97.440233506301       |                      |                       |     |                       |
| KLF8-regulon          | Memory 2             | 0.0344586673391022    |     | 0.00983028620358606   |
|                       | 59853793             | 0.627958119557831     |     | 9.09065091443759e-93  |
| 3.68820694242897e-92  |                      | 90.5797101449275      |     | 76.9736842105263      |
| MAFB-regulon          | Memory 2             | 0.0577060853443626    |     | 0.00202154869695846   |
|                       | 52090995.5           | 0.54651446367109      |     | 1.52632043558136e-13  |
| 2.25768231096409e-13  |                      | 100                   |     | 99.9976834692365      |
| MAFF-regulon          | Memory 2             | 0.0153716782330775    |     | 0.00313740377939722   |
|                       | 50912356             | 0.534148726982413     |     | 1.02691523873458e-11  |
| 1.4582196390031e-11   |                      | 34.8731884057971      |     | 28.2222942920682      |
| MAFG-regulon          | Memory 2             | 0.0270545347934932    |     | 0.00173143384511752   |
|                       | 49270115             | 0.516919099275765     |     | 0.0053225903023919    |
| 0.00599847478523531   |                      | 61.231884057971       |     | 58.4669199406968      |
| MAX-regulon           | Memory 2             | 0.207025198807899     |     | 0.00983348715509463   |
|                       | 67862543.5           | 0.71198219976922      |     | 2.61396293786077e-248 |
| 5.30261053108899e-247 |                      | 100                   | 100 |                       |
| MAZ-regulon           | Memory 2             |                       |     |                       |
|                       | 0.131077839872096    | -0.00549327654559409  |     | 39207567              |
|                       | 0.411347532240065    | 5.42133180147648e-45  |     |                       |
| 1.24165986420913e-44  |                      | 100                   | 100 |                       |



MEF2A-regulon Memory 2 0.0447838950079873 0.00423568871752717  
55581032 0.583130301162428 8.99341426512904e-40  
1.87803650830636e-39 100 99.9976834692365

MLX-regulon Memory 2 0.0550962930907693 0.00228187136396072  
51595668 0.541317718237342 5.38858023916457e-11  
7.42891644622688e-11 100 99.9884173461824

MXD4-regulon Memory 2 0.0753958877186663 -0.0176311763542812  
47541586.5 0.498784183307079 0.846825330116003  
0.846825330116003 89.9909420289855 88.5331727205337

MXI1-regulon Memory 2 0.072396216802355 0.00753323298286582  
57348182.5 0.601670421167115  
1.30024531990497e-58 3.55066991204818e-58 100 100

MYBL1-regulon Memory 2  
0.0218764898545213 -0.00842362329120189 45042374  
0.472563609752527 1.22385978907508e-05  
1.52445693025141e-05 83.4692028985507 79.8855633802817

MYC-regulon Memory 2 0.284426677841506 -0.0320128281813543  
32865257.5 0.344806974864298  
4.81244563309241e-134 2.84736366624634e-133 100 100

NFATC1-regulon Memory 2 0.0395998017239955 -0.0114764872693937  
39900111.5 0.418613386585004  
3.37380713045659e-38 6.94319728296864e-38 93.4329710144928  
94.8989992587102

NFE2L1-regulon Memory 2 0.161514774632954 -0.0222342903571772  
41936438 0.439977575814344 1.58155475236042e-21  
2.6114043585486e-21 100 99.9328206078577

NFE2L2-regulon Memory 2  
0.102560196031835 -0.00874590924592733 38975273  
0.408910411781808 2.11242702409558e-47  
4.99941062369286e-47 100 100

NFKB1-regulon Memory 2 0.0499270868640804 -0.0070865414949056  
43329501.5 0.45459294924414 5.63542399707548e-13  
8.24979595448162e-13 99.9547101449275 99.9305040770941

NFKB2-regulon Memory 2 0.073637549090267  
0.000274303795725184 49763178 0.522092086630193  
0.000452445615216561 0.000535393978006263 100 100

NFYA-regulon Memory 2 0.0270650354185051 0.0064294887984991  
62831258.5 0.659196300844493  
6.05879210788809e-141 4.52814989115847e-140 100  
98.9668272794663

NFYB-regulon Memory 2 0.0968609062496662 -0.0123657068025561  
31646102 0.332016163173741 1.05323376585774e-156  
9.34744967198741e-156 100 100

NFYC-regulon Memory 2  
0.078828271558169 -0.00494719828312014 38882853.5  
0.407940789431718 2.22957950721941e-48  
5.36610661059588e-48 100 100

NR1H3-regulon Memory 2 0.0112858333946394 0.00289217880225892  
50624785 0.531131665985137 1.00183292564915e-11  
1.43697247921394e-11 27.7173913043478 21.8170867309118

|                       |                   |                       |                       |
|-----------------------|-------------------|-----------------------|-----------------------|
| NR2C2-regulon         | Memory 2          | 0.0290463369513252    | 0.0076315188265665    |
| 57442629.5            |                   | 0.602661315102908     |                       |
| 1.54087135913859e-60  |                   | 4.46538230607509e-60  | 85.6884057971015      |
| 75.4818383988139      |                   |                       |                       |
| NR3C1-regulon         | Memory 2          | 0.231572015375916     | 0.00640615402107275   |
| 57044498              |                   | 0.598484304832619     | 4.15197415910994e-55  |
| 1.11241571810115e-54  | 100               | 100                   |                       |
| NRF1-regulon          | Memory 2          |                       |                       |
| 0.0253599542435728    |                   | -0.00143924552540338  | 45349603.5            |
| 0.475786918575958     |                   | 0.000120958354947781  | 0.00014680415728705   |
| 99.9094202898551      |                   | 99.9698851000741      |                       |
| PAX5-regulon          | Memory 2          | 0.108256598326853     | 0.00839754450388108   |
| 59661170              |                   | 0.625937208755009     | 6.16778491158249e-89  |
| 2.36709583093166e-88  | 100               | 100                   |                       |
| POU2F1-regulon        | Memory 2          |                       |                       |
| 0.00396730250071042   |                   | -0.000959360957054524 | 47340369.5            |
| 0.496673108258869     |                   | 0.433902953526466     | 0.440101567148272     |
| 17.8894927536232      |                   | 18.3700889547813      |                       |
| POU6F1-regulon        | Memory 2          | 0.0365093360813738    | 0.00578889430303725   |
| 52505868.5            |                   | 0.550867117962111     |                       |
| 1.59400450143014e-16  |                   | 2.43385633551699e-16  | 71.5126811594203      |
| 65.0389177168273      |                   |                       |                       |
| REL-regulon           | Memory 2          |                       |                       |
| 0.254975000304526     |                   | -0.00918386958691914  | 36040201.5            |
| 0.378117008598358     |                   | 2.01155337320002e-83  |                       |
| 7.14101447486006e-83  | 100               | 100                   |                       |
| RELA-regulon          | Memory 2          | 0.096563000336543     | 0.00472863410448215   |
| 58977561.5            |                   | 0.618765106760174     |                       |
| 2.63948679361396e-79  |                   | 9.14163718763861e-79  | 100                   |
| RELB-regulon          | Memory 2          |                       |                       |
| 0.0967295325847011    |                   | -0.00888656734812816  | 31056095              |
| 0.325826084522486     |                   | 2.59528686660333e-168 |                       |
| 2.83485180813595e-167 | 100               | 100                   |                       |
| REST-regulon          | Memory 2          | 0.225671996097605     | 0.00741430471048563   |
| 62660174              |                   | 0.657401361952224     | 7.90413741860617e-138 |
| 5.10176142473671e-137 | 100               | 100                   |                       |
| RFX5-regulon          | Memory 2          |                       |                       |
| 0.0622171305241673    |                   | -0.00329150907385947  | 45650083              |
| 0.478939409543167     |                   | 0.000826774212914088  |                       |
| 0.000946789824466133  | 100               | 100                   |                       |
| RXRA-regulon          | Memory 2          |                       |                       |
| 0.014367427727935     |                   | -0.00017103354653444  | 48268822.5            |
| 0.506414004712629     |                   | 0.297235326908995     | 0.31034865015498      |
| 66.8025362318841      | 64.1331541882876  |                       |                       |
| SETDB1-regulon        | Memory 2          | 0.0604809234106772    |                       |
| 0.000802443459693734  |                   | 48641664.5            | 0.510325689327373     |
| 0.1011189522699       | 0.107961588137789 |                       | 94.429347826087       |
| 95.0843217197924      |                   |                       |                       |
| SOX5-regulon          | Memory 2          | 0.00905364928606905   | 0.00131429969907231   |
| 49191598.5            |                   | 0.516095340726424     |                       |

|                       |                       |                       |
|-----------------------|-----------------------|-----------------------|
| 0.000473092865951921  | 0.000550649073485023  | 25.3623188405797      |
| 22.3475722757598      |                       |                       |
| SP1-regulon           | Memory 2              | 0.00175572179169999   |
| 51328138              | 0.538510918078072     | 2.57144275591812e-10  |
| 3.47757020324164e-10  | 65.625                | 59.5255744996294      |
| SP2-regulon           | Memory 2              |                       |
| 0.0280680360326866    | -0.00018092483749883  | 47036421              |
| 0.493484222159329     | 0.300915087216365     | 0.311897389669517     |
| 100                   | 100                   |                       |
| SP3-regulon           | Memory 2              | 0.00416935009906336   |
| 61154626              | 0.64160585353751      | 6.23073776177067e-112 |
| 2.85407987797237e-111 | 100                   | 100                   |
| SP4-regulon           | Memory 2              | 0.00957597167458425   |
| 0.000986027544000867  | 49378415              | 0.518055332435594     |
| 0.000347958410740497  | 0.000415210876681937  | 32.6086956521739      |
| 28.8315418828762      |                       |                       |
| SPI1-regulon          | Memory 2              | 0.0164047497325999    |
| 62572816.5            | 0.656484847748534     |                       |
| 2.98531619336879e-136 | 1.84310825851465e-135 | 100 100               |
| SPIB-regulon          | Memory 2              |                       |
| 0.559280476491772     | -0.00543522194014223  | 41759735              |
| 0.438123690236864     | 8.89649583693979e-23  |                       |
| 1.50393143910173e-22  | 100                   | 100                   |
| SREBF1-regulon        | Memory 2              | 0.0409935562856367    |
| 6.69331636064599e-05  | 48233563.5            | 0.506044083706328     |
| 0.337256911591642     | 0.347032474246472     | 96.9655797101449      |
| 96.8912157153447      |                       |                       |
| SREBF2-regulon        | Memory 2              | 0.00405214189389147   |
| 56251751              | 0.590167172526482     | 1.75504251122437e-46  |
| 4.08550879662065e-46  | 100                   | 100                   |
| SRF-regulon           | Memory 2              | 0.00318200896906649   |
| 55205428.5            | 0.579189644175839     |                       |
| 2.98905848071873e-36  | 5.89508755919527e-36  | 99.320652173913       |
| 97.8641586360267      |                       |                       |
| STAT1-regulon         | Memory 2              | 0.010030905899469     |
| 70087100.5            | 0.735321215737167     |                       |
| 1.70338178723144e-305 | 4.03133689644773e-304 | 100 100               |
| STAT2-regulon         | Memory 2              | 0.00680751685651472   |
| 55978999.5            | 0.587305590821099     |                       |
| 1.09107841681604e-43  | 2.42083023731058e-43  | 100                   |
| 99.96061897702        |                       |                       |
| STAT5A-regulon        | Memory 2              |                       |
| 0.0643858850562288    | -0.00759133846869496  | 37951643              |
| 0.398170962572249     | 8.64336823741101e-59  |                       |
| 2.40658488178895e-58  | 100                   | 100                   |
| TBP-regulon           | Memory 2              | -0.0013373988831463   |
| 47178724              | 0.494977198958434     | 0.39370328528415      |
| 0.402200478491722     | 49.6829710144928      | 49.8957561156412      |
| TCF12-regulon         | Memory 2              | 0.00226591028412874   |
| 49900158.5            | 0.523529222238225     |                       |

9.71355120918517e-07      1.24263447901288e-06      29.2119565217391  
 25.0162157153447  
 TFDP1-regulon      Memory 2 0.50834893415244 -0.020827853242232  
 33305679 0.349427672118236      2.68287701871131e-126  
 1.46526360252695e-125      100      100  
 TFDP2-regulon      Memory 2  
 0.026160653384405      -0.00101173126440569      46728060  
 0.490249042164889      0.1215971243315      0.128856654142336      100  
     99.9953669384729  
 TFEC-regulon      Memory 2 0.101935640674514      0.0109257428570806  
     61453177.5      0.644738116826675  
 7.51477874304239e-117      3.81106636254292e-116      100      100  
 THAP1-regulon      Memory 2 0.0381277511902077      0.00101187613070668  
     51175497 0.536909479797837      4.63112132380055e-09  
 6.14597409326802e-09      100      100  
 THAP11-regulon      Memory 2 0.181442551064343      0.00311648977928428  
     55062067 0.577685562087725      5.9640778879649e-35  
 1.14445818931218e-34      100      100  
 TP53-regulon      Memory 2  
 0.0892288140632645      -0.00959475993908734      35621500  
 0.373724187468441      2.09668346905665e-89  
 8.27025146127902e-89      100      100  
 USF2-regulon      Memory 2 0.13209679517886 0.0071589449357341  
 61335157.5      0.643499905953887      6.80933210056584e-115  
 3.33422468372534e-114      100      100  
 XBP1-regulon      Memory 2 0.196092870896818  
 0.000844077125053438      58151350 0.610096880505957  
 2.05404245143039e-68      6.34073974137206e-68      100      100  
 YBX1-regulon      Memory 2  
 0.0920212501742367      -0.00332427112985402      39611761.5  
 0.415588152682543      5.91745343007109e-41  
 1.29273598010784e-40      100      100  
 YY1-regulon      Memory 2 0.626967829193125      -0.0131430446842875  
     37388030 0.392257797476123      1.34738227706752e-65  
 3.98600590299142e-65      100      100  
 YY2-regulon      Memory 2 0.0563147928157428      0.00558447697402103  
     52751842.5      0.553447762608978  
 2.08047087499308e-17      3.2111615679241e-17      94.2028985507246  
 90.3423832468495  
 ZBTB33-regulon      Memory 2 0.373889585789909      0.00847601567300094  
     57936066 0.60783822104538 1.03704367204485e-65  
 3.13319577511422e-65      100      100  
 ZNF143-regulon      Memory 2 0.0253115510454914      0.00208213192445545  
     54457833 0.571346220378622      9.61858704991561e-30  
 1.77381735206236e-29      100      99.9930504077094  
 ZNF274-regulon      Memory 2 0.0702456759101156      0.00515498724663789  
     57370151 0.601900904437399      7.18180418602977e-59  
 2.03963238883246e-58      100      100  
 ZNF76-regulon      Memory 2 0.0151196276328832  
 0.000591293367932833      50013085.5      0.524713999727052

|                       |                       |                       |
|-----------------------|-----------------------|-----------------------|
| 8.71978499225595e-05  | 0.000106742195594857  | 99.6829710144928      |
| 99.4486656782802      |                       |                       |
| ATF1-regulon          | Memory 3              | 0.112318504998996     |
| 92691059              | 0.657474534324634     | 4.54478725166107e-203 |
| 2.68899912389946e-202 | 100                   | 100                   |
| ATF3-regulon          | Memory 3              | 0.0582126545599008    |
| 94234885.5            | 0.668425176383492     | 0.00776500026996162   |
| 5.4458488345634e-232  | 3.86655267254001e-231 | 100                   |
| ATF4-regulon          | Memory 3              | 0.121611797920629     |
| 97940013              | 0.694706319397253     | 0                     |
| ATF5-regulon          | Memory 3              | 0.124101617050706     |
| 77791318.5            | 0.551787965927617     | 0                     |
| 1.53070617686947e-23  | 2.55717973077018e-23  | 100                   |
| 99.9976202375003      |                       |                       |
| ATF6-regulon          | Memory 3              | 0.134351057934091     |
| 79717556.5            | 0.565451122285        | 1.30765947524198e-36  |
| 2.61531895048397e-36  | 100                   | 100                   |
| ATF6B-regulon         | Memory 3              |                       |
| 0.0569216490947047    | -0.000404791714806604 | 75836528.5371094      |
| 0.537922285306211     | 2.42789787386975e-13  |                       |
| 3.62906840094216e-13  | 100                   | 99.9143285500107      |
| BACH1-regulon         | Memory 3              | 0.0552891618714063    |
| 95117008              | 0.674682231661119     | 2.18705092350689e-249 |
| 1.72534017298877e-248 | 99.9403874813711      | 99.5335665500583      |
| BATF-regulon          | Memory 3              |                       |
| 0.0164374044230455    | -0.00308397078651715  | 70188225.5            |
| 0.497857844904813     | 0.660611209317124     | 0.672710486350415     |
| 53.4128166915052      | 51.5813521810523      |                       |
| BATF3-regulon         | Memory 3              | 0.0978673467170506    |
| 96663057              | 0.685648638316567     | 2.10250131797365e-281 |
| 2.13253705108756e-280 | 100                   | 100                   |
| BCL11A-regulon        | Memory 3              |                       |
| 0.195838875009165     | -0.00935299633962036  | 49760116.5            |
| 0.352957553584289     | 2.54369734447902e-177 |                       |
| 1.29001793898579e-176 | 100                   | 100                   |
| BHLHE40-regulon       | Memory 3              | 0.0632230574827012    |
| 89756324              | 0.636657925384054     | 1.94133291056299e-153 |
| 8.35361434242258e-153 | 100                   | 100                   |
| BRF2-regulon          | Memory 3              | 0.0501857492939443    |
| 92764025              | 0.657992095429115     | 2.15893810394905e-204 |
| 1.33290961200333e-203 | 100                   | 99.7072892125366      |
| CEBPB-regulon         | Memory 3              | 0.156381738640658     |
| 102685331             | 0.728365722752136     | 0                     |
| 100                   |                       | 0                     |
| CEBPG-regulon         | Memory 3              | 0.0761159417064469    |
| 87179942              | 0.618383179427248     | 1.21099507482221e-115 |
| 4.09431668154174e-115 | 100                   | 100                   |
| CLOCK-regulon         | Memory 3              | 0.0174340704546422    |
| 74302584              | 0.527041737806847     | 2.752352898984e-08    |
| 3.61883436718267e-08  | 55.3502235469449      | 50.7531948311558      |

|                       |          |                       |                  |                       |
|-----------------------|----------|-----------------------|------------------|-----------------------|
| CREB1-regulon         | Memory 3 |                       |                  |                       |
| 0.0391484048091994    |          | -0.00412800719833852  |                  | 59684969.5            |
| 0.423356340423217     |          | 1.48974838823394e-49  |                  |                       |
| 3.46793887097081e-49  |          | 100                   | 99.9928607125009 |                       |
| CREB3-regulon         | Memory 3 |                       |                  |                       |
| 90580513              |          | 0.243323884626271     |                  | 0.00380522061170877   |
| 5.22942495583333e-166 |          | 0.642504047812869     |                  | 1.14163502556925e-166 |
|                       |          | 100                   | 100              |                       |
| CREB3L2-regulon       | Memory 3 |                       |                  |                       |
| 0.124183018446414     |          | -0.00280130676486505  |                  | 76441835              |
| 0.542215834102678     |          | 3.59996419364741e-16  |                  |                       |
| 5.67994350553258e-16  |          | 100                   | 100              |                       |
| CREB3L4-regulon       | Memory 3 |                       |                  |                       |
| 0.0104739296212114    |          | -0.000677508453411031 |                  | 70198717.5            |
| 0.49793226656844      |          | 0.627362968602152     |                  | 0.645547402474678     |
| 31.3263785394933      |          | 31.3486114085814      |                  |                       |
| CREB5-regulon         | Memory 3 |                       |                  |                       |
| 81639586.5            |          | 0.0429023182929491    |                  | 0.00402565337036617   |
| 1.20902119291796e-52  |          | 0.579084430533296     |                  |                       |
| 99.6120987125485      |          | 2.96001740335087e-52  |                  | 99.7615499254843      |
| CREM-regulon          | Memory 3 |                       |                  |                       |
| 78507564.5            |          | 0.152745908403394     |                  | 0.00296562181700477   |
| 4.74121992022858e-28  |          | 0.556868429031528     |                  |                       |
|                       |          | 8.3117682521553e-28   |                  | 100 100               |
| CTCF-regulon          | Memory 3 |                       |                  |                       |
| 82982243.5            |          | 0.374253634986006     |                  | 0.00368591133660179   |
| 3.40434402906424e-65  |          | 0.58860814075256      |                  | 1.27063544746764e-65  |
|                       |          | 100                   | 100              |                       |
| CUX1-regulon          | Memory 3 |                       |                  |                       |
| 0.0696476141968901    |          | -0.00761336662527975  |                  | 52194801              |
| 0.37022721341054      |          | 1.45039477079709e-138 |                  | 5.56637993116722e-138 |
|                       |          | 100                   |                  | 100                   |
| DDIT3-regulon         | Memory 3 |                       |                  |                       |
| 80983545.5            |          | 0.0904236891952161    |                  | 0.0059559301379027    |
| 7.79715672433584e-47  |          | 0.574431012440696     |                  |                       |
|                       |          | 1.78580041105756e-46  |                  | 100 100               |
| E2F1-regulon          | Memory 3 |                       |                  |                       |
| 82387246              |          | 0.440169242212463     |                  | 0.00267186530586727   |
| 2.70606740388668e-59  |          | 0.584387715304224     |                  | 1.08623832409536e-59  |
|                       |          | 100                   | 100              |                       |
| E2F2-regulon          | Memory 3 |                       |                  |                       |
| 0.0528832555107985    |          | -0.00112059029336811  |                  | 75638296.5            |
| 0.536516189424981     |          | 1.77908533624103e-12  |                  |                       |
| 2.60443420356934e-12  |          | 100                   | 100              |                       |
| E2F3-regulon          | Memory 3 |                       |                  |                       |
| 0.000646878614892644  |          | 0.0217143522114026    |                  |                       |
| 1.16279075123453e-06  |          | 74040082              |                  | 0.525179763393443     |
|                       |          | 1.50105715159367e-06  |                  | 100 100               |
| E2F4-regulon          | Memory 3 |                       |                  |                       |
| 96501147.5            |          | 0.419010342123782     |                  | 0.0219778105754248    |
| 5.84706409392674e-278 |          | 0.684500184795119     |                  |                       |
|                       |          | 5.53522067558398e-277 |                  | 100 100               |
| E2F6-regulon          | Memory 3 |                       |                  |                       |
| 96154732              |          | 0.0814081794164875    |                  | 0.00972608504182688   |
| 9.68676559143199e-270 |          | 0.68204299666929      |                  | 1.15968320460805e-270 |
|                       |          | 100                   | 100              |                       |
| E2F7-regulon          | Memory 3 |                       |                  |                       |
| 0.0296539122061545    |          | -0.000993577972160774 |                  | 67225268.5            |

|                       |                       |                  |                       |
|-----------------------|-----------------------|------------------|-----------------------|
| 0.476841052186986     | 7.76066196081354e-06  |                  |                       |
| 9.83941070031717e-06  | 100                   | 100              |                       |
| E2F8-regulon          | Memory 3              |                  |                       |
| 0.0741174356391858    | -0.000733401214706067 |                  | 79868012              |
| 0.566518330501912     | 9.31866713332874e-38  |                  |                       |
| 1.91775468540968e-37  | 100                   | 100              |                       |
| EGR1-regulon          | Memory 3              |                  |                       |
| 0.0443016755928644    | -0.00341373660020712  |                  | 55961922              |
| 0.396948087591291     | 4.2395524975505e-88   |                  |                       |
| 1.28088607372802e-87  | 100                   | 100              |                       |
| EGR2-regulon          | Memory 3              |                  |                       |
| 0.0428027202653895    | -0.00350428765243505  |                  | 64143645.5            |
| 0.454982539955627     | 3.55272119312738e-18  |                  | 5.7328001070919e-18   |
| 100                   | 99.9952404750006      |                  |                       |
| EGR3-regulon          | Memory 3              |                  |                       |
| 0.0394302433320419    | -0.00220384707297054  |                  | 67033895              |
| 0.475483605156474     | 2.2036866265559e-06   |                  |                       |
| 2.81913063937781e-06  | 100                   | 99.9952404750006 |                       |
| ELF1-regulon          | Memory 3              |                  |                       |
| 0.703949338734892     | -0.00334243342404739  |                  | 71818204              |
| 0.509419578763595     | 0.0689428686363551    |                  | 0.0747319644760491    |
| 100                   | 100                   |                  |                       |
| ELF2-regulon          | Memory 3              |                  |                       |
| 0.0344151140105099    | 0.0018994965123077    |                  |                       |
| 76573238              | 0.543147899473016     |                  | 7.99714623576512e-17  |
| 1.27594917469511e-16  | 99.9403874813711      |                  | 99.5026296375622      |
| ELF4-regulon          | Memory 3              |                  |                       |
| 0.000314392380620473  | 72729210.5            |                  | 0.515881513504833     |
| 0.00216570371656994   | 0.00248008006252365   |                  | 98.956780923994       |
| 98.2865710002142      |                       |                  |                       |
| ELK1-regulon          | Memory 3              |                  |                       |
| 0.0661450817096798    |                       |                  |                       |
| 9.73048881657834e-05  | 70808168              |                  | 0.502255209773582     |
| 0.663235690768014     | 0.672710486350415     |                  | 100 100               |
| ELK3-regulon          | Memory 3              |                  |                       |
| 0.0621887058817043    | -0.00293365835377036  |                  | 62809515              |
| 0.445519309751128     | 7.02513420209015e-26  |                  |                       |
| 1.20189042975518e-25  | 100                   | 100              |                       |
| ELK4-regulon          | Memory 3              |                  |                       |
| 0.046318132141083     | 0.00142657668195421   |                  |                       |
| 73556559              | 0.521750046841599     |                  | 2.67249699353488e-05  |
| 3.27150494036166e-05  | 97.7049180327869      |                  | 96.6516741629185      |
| ESRRA-regulon         | Memory 3              |                  |                       |
| 0.100167400846117     | 0.00910486902881155   |                  |                       |
| 95113556              | 0.674657745997486     |                  | 2.56570220525843e-249 |
| 1.91752480603525e-248 | 100                   | 100              |                       |
| ETS1-regulon          | Memory 3              |                  |                       |
| 0.230310747650951     | -0.0136365113332594   |                  |                       |
| 53975849.5            | 0.382860514246461     |                  |                       |
| 2.87815971167128e-113 | 9.50462044319352e-113 |                  | 100 100               |
| ETV2-regulon          | Memory 3              |                  |                       |
| 0.029680789698241     | 0.001164893557247     |                  |                       |
| 76123171.5            | 0.539955495958642     |                  |                       |
| 1.21104180013412e-14  | 1.86921669151136e-14  |                  | 100 100               |
| ETV3-regulon          | Memory 3              |                  |                       |
| 0.0111604722953626    | -0.000290027221208437 |                  | 70245489              |

|                       |                       |                       |
|-----------------------|-----------------------|-----------------------|
| 0.498264025321808     | 0.736993565567364     | 0.736993565567364     |
| 85.3651266766021      | 84.2673901144666      |                       |
| ETV5-regulon          | Memory 3              |                       |
| 0.0314034666631489    | -0.00222466205848885  | 60030155.5            |
| 0.425804807482002     | 1.50331549389483e-46  |                       |
| 3.38842539893754e-46  | 100 100               |                       |
| ETV6-regulon          | Memory 3              |                       |
| 111538394.5           | 0.483512332868005     | 0.0258486275119316    |
| 100                   | 0.791162111797696     | 0 0 100               |
| ETV7-regulon          | Memory 3              |                       |
| 0.0564385241133953    | -0.00824734567202911  | 49171247              |
| 0.34878059515413      | 2.02947767621928e-187 | 1.06735492601162e-186 |
| 100                   |                       | 100                   |
| FLI1-regulon          | Memory 3              |                       |
| 0.135689020476303     | -0.00890058441996813  | 53252764              |
| 0.377731537325511     | 3.1595125661267e-123  |                       |
| 1.09427020582925e-122 | 100 100               |                       |
| FOS-regulon           | Memory 3              |                       |
| 0.0782235976118692    | -0.00869696085987438  | 48563117.5            |
| 0.344467022042169     | 3.82712106296971e-198 |                       |
| 2.1738047637668e-197  | 100 100               |                       |
| FOSB-regulon          | Memory 3              |                       |
| 82570120              | 0.046549495651811     | 0.00548128791223351   |
| 4.52098314577021e-61  | 0.58568487383588      | 1.75108502124902e-61  |
|                       | 100                   | 99.2694129125913      |
| FOSL1-regulon         | Memory 3              |                       |
| 96176110.5            | 0.0689489272625316    | 0.00880634185706542   |
| 4.1382533465883e-271  | 0.682194638256771     |                       |
| FOX01-regulon         | Memory 3              |                       |
| 66014454.5            | 3.67269984509712e-270 | 100 100               |
| 8.50501399019194e-11  | 0.0138234643824534    | -0.0031029455690815   |
| 52.6451060184194      | 0.468252528338059     |                       |
|                       | 1.1957544421854e-10   | 48.5543964232489      |
| FOX03-regulon         | Memory 3              |                       |
| 0.0130525323586143    | -0.00722562703540262  | 62165878              |
| 0.44095387548579      | 3.6713166946312e-35   | 7.24065236996708e-35  |
| 38.628912071535       | 47.4096285190738      |                       |
| GABPA-regulon         | Memory 3              |                       |
| 0.0237764346550689    | -0.00184813966671324  | 62219519.5            |
| 0.441334364398242     | 9.58493170199122e-30  |                       |
| 1.70132537710344e-29  | 100 100               |                       |
| GTF2B-regulon         | Memory 3              |                       |
| 82449831              | 0.0841578463408511    | 0.00550812414610659   |
| 6.75457102409542e-60  | 0.58483164208826      | 2.66377448837566e-60  |
|                       | 100 100               |                       |
| HINFP-regulon         | Memory 3              |                       |
| 67567140.5            | 0.0146738010274089    | -0.0016810372052468   |
| 4.01165761534458e-05  | 0.479266012441228     |                       |
| 63.392113467076       | 4.86884941349513e-05  | 61.2518628912072      |
| HIVEP3-regulon        | Memory 3              |                       |
| 47980780.5            | 0.0608204749646278    | -0.0182142104832217   |
| 1.07428832704887e-208 | 0.340336399822231     |                       |
| 99.7287070750339      | 6.93404283822453e-208 | 99.2548435171386      |



|               |          |                              |                                        |
|---------------|----------|------------------------------|----------------------------------------|
| H0XB2-regulon | Memory 3 | 0.0445867849377067           | 0.00808159551919539                    |
|               |          | 84041336 0.596120476416394   | 3.23222023253339e-77                   |
|               |          | 9.36684230652532e-77         | 93.204172876304 82.9727993146284       |
| IKZF1-regulon | Memory 3 | 0.146968818641144            | 0.00335256687778099                    |
|               |          | 81323032 0.576839051909713   | 8.49635198328e-50                      |
|               |          | 2.0108033027096e-49          | 100 100                                |
| IRF1-regulon  | Memory 3 | 0.133673675202171            | -0.0019099889209109                    |
|               |          | 68744151 0.487614761918594   | 0.0167831987153596                     |
|               |          | 0.0186188610748521           | 100 100                                |
| IRF2-regulon  | Memory 3 | 0.0924418800081111           | 0.00801399548674393                    |
|               |          | 88947743.5 0.630922516883635 |                                        |
|               |          | 5.38418830952748e-141        | 2.12376316653584e-140 100 100          |
| IRF3-regulon  | Memory 3 |                              |                                        |
|               |          | 0.145004432647623            | -0.000477393581987534 69358638         |
|               |          | 0.491973429933958            | 0.121184094303775 0.130364707508606    |
|               |          | 100 100                      |                                        |
| IRF4-regulon  | Memory 3 |                              |                                        |
|               |          | 0.0577719774452538           | -0.000691500628209774 72765856         |
|               |          | 0.516141446699119            | 0.0018288947119728 0.00212871351721424 |
|               |          | 100 99.9952404750006         |                                        |
| IRF5-regulon  | Memory 3 | 0.065146331658197            | 0.0195468237544304                     |
|               |          | 91025983.5 0.64566385106361  | 2.4393472735347e-175                   |
|               |          | 1.19443900979975e-174        | 93.919523099851 79.4055353275743       |
| IRF7-regulon  | Memory 3 |                              |                                        |
|               |          | 0.102651214751946            | -0.00559733489304098 57940161          |
|               |          | 0.410980096496355            | 3.23512151640351e-66                   |
|               |          | 8.83437029479421e-66         | 100 100                                |
| IRF8-regulon  | Memory 3 | 0.0708466040499732           | -0.0117986892820306                    |
|               |          | 44128741 0.313013183281328   | 1.91709019998416e-285                  |
|               |          | 2.09405237229039e-284        | 100 100                                |
| IRF9-regulon  | Memory 3 | 0.0311706404735021           | -0.0029647906519763                    |
|               |          | 61562100.5 0.436671171901098 |                                        |
|               |          | 2.20433656562991e-34         | 4.22994313945198e-34 100 100           |
| JUN-regulon   | Memory 3 | 0.0907889644969754           | 0.00257939592850552                    |
|               |          | 74978255.5 0.531834398605112 |                                        |
|               |          | 7.90637769802297e-10         | 1.07952464723006e-09 100 100           |
| JUNB-regulon  | Memory 3 | 0.164264562352458            | 0.00483992481119117                    |
|               |          | 78915021 0.559758592068667   | 8.43013782534371e-31                   |
|               |          | 1.53471739897283e-30         | 100 100                                |
| JUND-regulon  | Memory 3 |                              |                                        |
|               |          | 0.0351213497216986           | -0.00360271469801695 58293962          |
|               |          | 0.413489671316496            | 1.22592713120666e-62                   |
|               |          | 3.22373430798788e-62         | 100 100                                |
| KLF11-regulon | Memory 3 | 0.0277530400955549           | 0.00628095176349551                    |
|               |          | 77999759 0.553266472292205   | 7.49951824178568e-31                   |
|               |          | 1.38302803939424e-30         | 50.1639344262295 40.1156564574855      |
| KLF12-regulon | Memory 3 |                              |                                        |
|               |          | 0.0418650283337243           | -0.00559854004703382 60864207          |
|               |          | 0.431720886416489            | 1.0876844902181e-39                    |
|               |          | 2.30524175538762e-39         | 98.4798807749628 98.6125984626734      |

|                       |                      |                      |                      |                     |         |
|-----------------------|----------------------|----------------------|----------------------|---------------------|---------|
| KLF13-regulon         | Memory 3             |                      |                      |                     |         |
| 0.0642305808011599    |                      | -0.00222611167416222 |                      | 68229600            |         |
| 0.483964958121323     |                      | 0.00196050222069559  |                      | 0.00226334402714451 |         |
| 100                   | 100                  |                      |                      |                     |         |
| KLF2-regulon          | Memory 3             | 0.108885204726454    |                      |                     |         |
| 3.97787995264215e-05  |                      | 70206417.5           | 0.497986884068433    |                     |         |
| 0.697494329367944     |                      | 0.702441097661333    |                      | 100                 | 100     |
| KLF3-regulon          | Memory 3             |                      |                      |                     |         |
| 0.0637535302653351    |                      | -0.00893642638059339 |                      | 62023240.5          |         |
| 0.439942121764325     |                      | 4.29917336706765e-31 |                      |                     |         |
| 8.03266602794219e-31  |                      | 99.9403874813711     | 99.8572142500178     |                     |         |
| KLF4-regulon          | Memory 3             |                      |                      |                     |         |
| 0.0133039319128551    |                      | -0.00280311582449381 |                      | 66263328            |         |
| 0.470017833323066     |                      | 5.87082225418432e-10 |                      |                     |         |
| 8.09375495237062e-10  |                      | 45.8122205663189     | 50.1320768187335     |                     |         |
| KLF6-regulon          | Memory 3             | 0.0919138109022553   |                      | 0.0243330664556009  |         |
| 109061171.5           |                      | 0.77359071865671     | 0                    | 0                   | 100 100 |
| KLF7-regulon          | Memory 3             | 0.0526294881187278   |                      | 0.00716015611042795 |         |
| 83105543.5            |                      | 0.589482730070633    |                      | 6.8842723987577e-67 |         |
| 1.91679741298744e-66  |                      | 99.8211624441133     | 97.3751219628281     |                     |         |
| KLF8-regulon          | Memory 3             |                      |                      |                     |         |
| 0.0211769772425511    |                      | -0.00424350146318983 |                      | 65754849            |         |
| 0.46641109932579      | 6.93078846985817e-11 |                      | 9.8417196271986e-11  |                     |         |
| 79.2846497764531      | 77.504105090312      |                      |                      |                     |         |
| MAFB-regulon          | Memory 3             |                      |                      |                     |         |
| 0.0543944148230213    |                      | -0.00149934907370309 |                      | 67242678.5          |         |
| 0.476964544482425     |                      | 8.67384958819344e-06 |                      |                     |         |
| 1.08042687852936e-05  |                      | 100                  | 99.9976202375003     |                     |         |
| MAFF-regulon          | Memory 3             |                      |                      |                     |         |
| 0.00973869509776975   |                      | -0.00285968435779026 |                      | 66947952.5          |         |
| 0.474873999378141     |                      | 1.14799925637617e-09 |                      |                     |         |
| 1.55253232767063e-09  |                      | 24.3517138599106     | 28.8807976963899     |                     |         |
| MAFG-regulon          | Memory 3             | 0.0340753205593024   |                      | 0.00936002739428835 |         |
| 83435074.5            |                      | 0.591820153368068    |                      |                     |         |
| 1.47362666726068e-75  |                      | 4.18509973502033e-75 |                      | 70.521609538003     |         |
| 57.6497465552938      |                      |                      |                      |                     |         |
| MAX-regulon           | Memory 3             | 0.206172062253408    |                      | 0.00918064894254103 |         |
| 98889088              | 0.701438280930502    | 0                    |                      | 0                   | 100 100 |
| MAZ-regulon           | Memory 3             | 0.139307240384566    |                      | 0.00324322400070517 |         |
| 86231061.5            |                      | 0.611652597517862    |                      |                     |         |
| 4.39495675231168e-103 |                      | 1.356704040931e-102  |                      | 100                 | 100     |
| MEF2A-regulon         | Memory 3             | 0.0370396152368518   |                      | -0.0040112855081228 |         |
| 59546949              | 0.422377335922203    |                      | 8.80979356437215e-51 |                     |         |
| 2.12032319684889e-50  | 100                  | 99.9976202375003     |                      |                     |         |
| MLX-regulon           | Memory 3             |                      |                      |                     |         |
| 0.0501103937106586    |                      | -0.00303982168992756 |                      | 64856679.5          |         |
| 0.46004021975954      | 1.20321122021855e-14 |                      | 1.86921669151136e-14 |                     | 100     |
| 99.9881011875015      |                      |                      |                      |                     |         |
| MXD4-regulon          | Memory 3             | 0.0650572240347398   |                      | -0.0292765480160743 |         |
| 61048256.5            |                      | 0.433026382983372    |                      |                     |         |

|                       |                       |                       |
|-----------------------|-----------------------|-----------------------|
| 2.63171761089849e-38  | 5.49564559922919e-38  | 86.3189269746647      |
| 88.7865591014017      |                       |                       |
| MXI1-regulon          | Memory 3              | 0.0651444333549318    |
| 71217553              | 0.505159052011855     | 0.319180530021108     |
| 0.338236084052219     | 100                   | 100                   |
| MYBL1-regulon         | Memory 3              | 0.0153515441132921    |
| 51956960.5            | 0.368540167500523     | -0.0156994576090197   |
| 2.93860074239907e-143 | 1.19223230120191e-142 | 70.9388971684054      |
| 80.7881773399015      |                       |                       |
| MYC-regulon           | Memory 3              | 0.338783594605951     |
| 100482645.5           | 0.712741674014316     | 0.0258101827222286    |
| 100                   |                       | 0 0 100               |
| NFATC1-regulon        | Memory 3              |                       |
| 0.0443039755605785    | -0.00670998811157271  | 65839808              |
| 0.467013728959805     | 1.89462233015268e-10  |                       |
| 2.63761147923217e-10  | 95.618479880775       | 94.7645225006544      |
| NFE2L1-regulon        | Memory 3              | 0.246287759657233     |
| 106222129.5           | 0.753452877563773     | 0.0687001528360357    |
| 99.9309868875086      |                       | 0 0 100               |
| NFE2L2-regulon        | Memory 3              | 0.121927267197322     |
| 96987454.5            | 0.687949648765143     | 0.0119287216124538    |
| 2.27945914868784e-288 | 2.69735999261394e-287 | 100 100               |
| NFKB1-regulon         | Memory 3              | 0.0718596676528152    |
| 97566824              | 0.692059221968038     | 5.07542695675693e-301 |
| 7.20710627859484e-300 | 100                   | 99.9262273625092      |
| NFKB2-regulon         | Memory 3              | 0.0854426599175957    |
| 97233178.5            | 0.689692613774016     | 0.0130294342151479    |
| 1.05936645652541e-293 | 1.3675457893328e-292  | 100 100               |
| NFYA-regulon          | Memory 3              | 0.0271287280953456    |
| 94065574.5            | 0.667224222676824     | 0.00667376529254244   |
| 1.00539377520285e-228 | 6.79837695613355e-228 | 99.8509687034277      |
| 98.9505247376312      |                       |                       |
| NFYB-regulon          | Memory 3              |                       |
| 0.107913613550512     | -0.000768072743856055 | 80320360              |
| 0.569726917110602     | 2.57049721249147e-41  |                       |
| 5.53046369960286e-41  | 100                   | 100                   |
| NFYC-regulon          | Memory 3              | 0.083721495335875     |
| 0.000201667419896204  | 76052221              | 0.539452231162114     |
| 2.58240721313287e-14  | 3.9010832368603e-14   | 100 100               |
| NR1H3-regulon         | Memory 3              | 0.00886155387611659   |
| 0.000353286859032919  | 71477246.5            | 0.507001105224125     |
| 0.0626692465233423    | 0.0684541000485739    | 23.4873323397914      |
| 21.9937650222508      |                       |                       |
| NR2C2-regulon         | Memory 3              | 0.0314710519311139    |
| 90802844              | 0.64408108201949      | 1.06773713114148e-172 |
| 5.05395575406969e-172 | 89.2399403874814      | 74.919683015635       |
| NR3C1-regulon         | Memory 3              |                       |
| 0.225458442456475     | -2.06712836653689e-05 | 66329902              |
| 0.470490054809371     | 1.21238830509262e-08  |                       |
| 1.60896391890796e-08  | 100                   | 100                   |

NRF1-regulon Memory 3 0.02675255993512 2.52617743278297e-05  
 73038877.5 0.518078037838649 0.000481888935140516  
 0.000565522551983085 100 99.9643035625045  
 PAX5-regulon Memory 3  
 0.0939533409390099 -0.00681848138043396 54104482  
 0.383772927956574 1.53569587463888e-111  
 4.9561094136073e-111 100 100  
 POU2F1-regulon Memory 3  
 0.0035052700433607 -0.00148446916015399 68501780  
 0.485895580348354 5.46590678656152e-05  
 6.57761664145538e-05 15.8569299552906 18.5454891601818  
 POU6F1-regulon Memory 3  
 0.0239647572214828 -0.00759924373701015 62948988.5  
 0.446508620645323 5.07013631724853e-26  
 8.77999215913769e-26 61.1624441132638 65.6885842792889  
 REL-regulon Memory 3 0.271397747468979 0.00829940489293668  
 89612302 0.635636351152364 3.49419621221571e-151  
 1.45934077098421e-150 100 100  
 RELA-regulon Memory 3 0.0966675185225917 0.00497056966698337  
 88346830.5 0.626660131718258  
 4.30467113361778e-132 1.60858763414138e-131 100 100  
 RELB-regulon Memory 3 0.106424670966103 0.00134007424646036  
 76081024.5 0.539656539624588 1.901095001406e-14  
 2.90274720644787e-14 100 100  
 REST-regulon Memory 3 0.220268251003001 0.00178149897264457  
 73752548.5 0.52314023599938 7.89287180766407e-06  
 9.91847607688759e-06 100 100  
 RFX5-regulon Memory 3 0.0541675886649839 -0.012073579284231  
 40461358.5 0.286999772415261 0 0 100  
 100  
 RXRA-regulon Memory 3  
 0.0128857299349103 -0.00177570013072244 67683730  
 0.480093002962716 8.33310289860763e-05  
 9.94370261850658e-05 63.2488822652757 64.344018466957  
 SETDB1-regulon Memory 3 0.0617825602176684 0.00222990768953839  
 74216144.5 0.526428606717151  
 3.33735577507454e-07 4.34774789046408e-07 95.8271236959762  
 94.9905999381262  
 SOX5-regulon Memory 3 0.00818592548802169  
 0.000413170899058953 71631308 0.50809389145467 0.0325313567459177  
 0.0358097105265141 23.9940387481371 22.3745270222032  
 SP1-regulon Memory 3 0.01174432752535 -0.00134931126227555  
 68658086.5 0.487004290772079 0.00946310656154532  
 0.0105807963129089 59.9403874813711 59.8129506675234  
 SP2-regulon Memory 3 0.0291475930608751  
 0.000979886635870904 75562394 0.535977799192094  
 3.73581986810883e-12 5.35844869971166e-12 100 100  
 SP3-regulon Memory 3  
 0.0263242039903747 -0.00210104272029949 60226951  
 0.427200713744327 7.02095751938914e-45

|                       |                       |                   |                       |
|-----------------------|-----------------------|-------------------|-----------------------|
| 1.55777494961447e-44  | 100                   | 100               |                       |
| SP4-regulon           | Memory 3              |                   |                       |
| 0.00802631558360923   | -0.000660440202866496 |                   | 70060045              |
| 0.496948637312881     | 0.462254808646567     |                   | 0.48264840314568      |
| 28.822652757079       | 29.0307227338712      |                   |                       |
| SPI1-regulon          | Memory 3              |                   |                       |
| 70070303.5            | 0.419517133888741     |                   | 0.0010519338332699    |
| 0.58583361953295      | 0.497021402718554     |                   | 0.565205675183198     |
|                       | 100                   | 100               |                       |
| SPIB-regulon          | Memory 3              |                   |                       |
| 73236051              | 0.566883441711856     |                   | 0.00262641272493414   |
| 0.000200522210319583  | 0.519476625323702     |                   | 0.000169455389002465  |
|                       | 100                   | 100               |                       |
| SREBF1-regulon        | Memory 3              |                   |                       |
| 77469580              | 0.0440122522209264    |                   | 0.00332847189658183   |
| 1.93962403680062e-21  | 0.549505816249494     |                   | 1.18836120564545e-21  |
|                       | 97.973174366617       | 96.8087384878989  |                       |
| SREBF2-regulon        | Memory 3              |                   |                       |
| 61165619.5            | 0.0968067288683867    |                   | -0.0023496316486728   |
|                       | 0.433858860080995     |                   |                       |
| 2.38171545197659e-37  | 4.8314799168668e-37   |                   | 100 100               |
| SRF-regulon           | Memory 3              |                   |                       |
| 80331460.5            | 0.023344628091218     |                   | 0.00278107867167673   |
|                       | 0.569805654975365     |                   |                       |
| 2.09041656587823e-41  | 4.56675619007244e-41  |                   | 99.3144560357675      |
| 97.8248970752719      |                       |                   |                       |
| STAT1-regulon         | Memory 3              |                   |                       |
| 75835317              | 0.0812343997218916    |                   | 0.001582927603796     |
|                       | 0.537913691653215     |                   | 2.46816748311942e-13  |
| 3.65083106878081e-13  | 100                   | 100               |                       |
| STAT2-regulon         | Memory 3              |                   |                       |
| 0.064978137711991     | -0.00135651458852046  |                   | 68319304              |
| 0.484601244903061     | 0.00294622937843916   |                   | 0.00334691657390688   |
|                       | 100                   | 99.9595440375051  |                       |
| STAT5A-regulon        | Memory 3              |                   |                       |
| 90385365              | 0.0780030506791472    |                   | 0.00690582347609345   |
|                       | 0.641119827567587     |                   | 1.73835289281217e-163 |
| 7.71394096185401e-163 | 100                   | 100               |                       |
| TBP-regulon           | Memory 3              |                   |                       |
| 0.0171184883655577    | -0.00408479769459981  |                   | 66511031.5            |
| 0.471774839285346     | 5.57407842206256e-09  |                   |                       |
| 7.46716165974419e-09  | 46.7064083457526      | 50.1392161062326  |                       |
| TCF12-regulon         | Memory 3              |                   |                       |
| 0.000242904381051377  | 0.00926865788952966   |                   |                       |
|                       | 71187066              | 0.504942802177791 |                       |
| 0.210862354896403     | 0.225131236054806     |                   | 26.1400894187779      |
| 25.1469503343566      |                       |                   |                       |
| TFDP1-regulon         | Memory 3              |                   |                       |
| 86369843.5            | 0.536974479190212     |                   | 0.00951467035228215   |
|                       | 0.612637003476829     |                   |                       |
| 7.10682137856909e-105 | 2.24259696834847e-104 |                   | 100 100               |
| TFDP2-regulon         | Memory 3              |                   |                       |
| 0.0234843015099297    | -0.00392938192518155  |                   | 56530537              |
| 0.400981377170332     | 1.74863373821613e-81  |                   |                       |
| 5.17304147555604e-81  | 100                   | 99.9952404750006  |                       |
| TFEC-regulon          | Memory 3              |                   |                       |
| 116810856             | 0.119890613550329     |                   | 0.0306124870152405    |
|                       | 0.828560639841884     |                   | 0 0 100               |
| 100                   |                       |                   |                       |
| THAP1-regulon         | Memory 3              |                   |                       |
|                       | 0.0386016568970594    |                   | 0.00155123900346138   |

|                |                       |                       |                       |
|----------------|-----------------------|-----------------------|-----------------------|
|                | 78066884.5            | 0.553742605668282     | 3.1560834743138e-25   |
|                | 5.33528396848286e-25  | 100                   | 100                   |
| THAP11-regulon | Memory 3              | 0.182912162220483     | 0.00478850352474133   |
|                | 87754720              | 0.622460184285829     | 1.31548527079311e-123 |
|                | 4.66997271131553e-123 | 100                   | 100                   |
| TP53-regulon   | Memory 3              | 0.105314357508374     | 0.00751317251647379   |
|                | 87985393.5            | 0.624096393361761     | 7.036514728892e-127   |
|                | 2.56201305513504e-126 | 100                   | 100                   |
| USF2-regulon   | Memory 3              |                       |                       |
|                | 0.123360359187739     | -0.00207960744740295  | 61595172              |
|                | 0.436905754063569     | 3.8455959774688e-34   |                       |
|                | 7.28099505067427e-34  | 100                   | 100                   |
| XBP1-regulon   | Memory 3              |                       |                       |
|                | 0.189885536106624     | -0.00583581785549053  | 67303944              |
|                | 0.477399111813052     | 1.27747343644474e-05  |                       |
|                | 1.57740198239263e-05  | 100                   | 100                   |
| YBX1-regulon   | Memory 3              | 0.0964794724883297    | 0.00139916136195592   |
|                | 78817583.5            | 0.559067450165344     |                       |
|                | 3.94170500893069e-30  | 7.08509001605264e-30  | 100 100               |
| YY1-regulon    | Memory 3              | 0.658095421087987     | 0.0201110553506564    |
|                | 92061774.5            | 0.653010904951328     |                       |
|                | 7.75981978197145e-192 | 4.2380554193844e-191  | 100 100               |
| YY2-regulon    | Memory 3              |                       |                       |
|                | 0.0463231415130338    | -0.00505248488844114  | 65357150              |
|                | 0.463590148010233     | 2.01788031175627e-12  |                       |
|                | 2.92386739050398e-12  | 90.521609538003       | 90.5309250136836      |
| ZBTB33-regulon | Memory 3              | 0.371477814287913     | 0.00610304611735879   |
|                | 79519939              | 0.564049385427221     | 3.93882091715618e-35  |
|                | 7.66181603063256e-35  | 100                   | 100                   |
| ZNF143-regulon | Memory 3              | 0.0236233273983958    |                       |
|                | 0.000315952373914945  | 72650141.5            | 0.515320662711721     |
|                | 0.00309426822227553   | 0.00348719117113592   | 100                   |
|                | 99.9928607125009      |                       |                       |
| ZNF274-regulon | Memory 3              |                       |                       |
|                | 0.0651867440610479    | -0.000167145049390346 | 71203359              |
|                | 0.50505837138914      | 0.328716095880484     | 0.345760634185398     |
|                | 100                   |                       | 100                   |
| ZNF76-regulon  | Memory 3              |                       |                       |
|                | 0.0132431299571716    | -0.00141888594812511  | 63370398.5            |
|                | 0.449497758394949     | 1.82106518484559e-22  |                       |
|                | 3.00687507265202e-22  | 99.4634873323398      | 99.4597939125675      |
| ATF1-regulon   | Memory IgA            | 0.106316782578359     |                       |
|                | 9.21200895805108e-05  | 19641820.5            | 0.526884979625202     |
|                | 0.0075984762546704    | 0.0110100370220734    | 100 100               |
| ATF3-regulon   | Memory IgA            | 0.051277164388243     |                       |
|                | 0.000260182633532662  | 20046410.5            | 0.537737965167279     |
|                | 0.00017896006277143   | 0.00032167504953852   | 100 100               |
| ATF4-regulon   | Memory IgA            | 0.108901157921124     |                       |
|                | 0.000152325163638209  | 19506287.5            | 0.523249354203234     |
|                | 0.0209753409984477    | 0.0280990417149016    | 100 100               |

ATF5-regulon Memory IgA 0.122153426884688  
 0.00378989324012713 20327604 0.545280882664068  
 6.92633902327541e-06 1.53678147078923e-05 100  
 99.9977547767125  
 ATF6-regulon Memory IgA 0.137191772245964  
 0.000792444049342866 23360574 0.626639244362458  
 2.93436367318274e-36 2.97628315422821e-35 100 100  
 ATF6B-regulon Memory IgA 0.0594977516043622  
 0.0022426070372108 22601493.3867188 0.606277171841605  
 4.91729080412276e-26 2.79302117674173e-25 100  
 99.9191719616516  
 BACH1-regulon Memory IgA 0.0477844922854887  
 0.00458625385093355 21202337 0.568745290094249  
 8.74842528860427e-12 2.70060084996045e-11 100  
 99.5554457890837  
 BATF-regulon Memory IgA  
 0.0152686118590692 -0.00410037647462289 17999926.5  
 0.482841746120612 0.0705346883223296 0.0894279084086678  
 50.179211469534 51.745661105997  
 BATF3-regulon Memory IgA  
 0.0750768585472359 -0.00823872691121702 16606021  
 0.44545071757685 6.08792574439539e-08 1.51664115035815e-07 100  
 100  
 BCL11A-regulon Memory IgA 0.211326155966397  
 0.00695409868942229 21194364.5 0.56853143056427  
 1.01409750205518e-11 3.06386904876247e-11 100 100  
 BHLHE40-regulon Memory IgA 0.0622241712459117  
 0.00669651801697203 22877560 0.613682562391523  
 1.51200648740717e-29 1.2629701247754e-28 100 100  
 BRF2-regulon Memory IgA 0.0419074443239423  
 0.000300654854909044 18930391.5 0.507801144999497  
 0.438590990227366 0.486561879783485 99.5221027479092  
 99.7328184287927  
 CEBPB-regulon Memory IgA  
 0.142335334096877 -0.000770907116376479 19243383.5  
 0.516197046160637 0.107790494264422 0.130822651158529  
 100 100  
 CEBPG-regulon Memory IgA  
 0.0618244549276307 -0.00635347420125029 16538863  
 0.44364922766599 2.20533673919645e-08 5.592103874391e-08 100  
 100  
 CLOCK-regulon Memory IgA  
 0.0148980353475552 -0.000709784430562754 18588599  
 0.49863268047766 0.885127115360791 0.891404612632853  
 51.8518518518518 51.0788297896226  
 CREB1-regulon Memory IgA 0.0447769116722757  
 0.00183964922736404 19822461.5 0.531730611403808  
 0.00162973125376806 0.00262979361403482 100  
 99.9932643301376  
 CREB3-regulon Memory IgA

|                            |                       |                      |
|----------------------------|-----------------------|----------------------|
| 0.239529386668522          | -0.000275712611559037 | 20836362             |
| 0.558928138449964          | 4.886967352541e-09    |                      |
| 1.26172611647422e-08       | 100 100               |                      |
| CREB3L2-regulon Memory IgA |                       |                      |
| 0.126056466714423          | -0.000734280584593572 | 22012602             |
| 0.590480365924721          | 2.61577726359417e-19  |                      |
| 1.09247168067757e-18       | 100 100               |                      |
| CREB3L4-regulon Memory IgA |                       |                      |
| 0.010503305500968          | -0.000609277774556058 | 18421661             |
| 0.494154626891503          | 0.480386831400736     | 0.524730231222343    |
| 30.2270011947431           | 31.3680145490469      |                      |
| CREB5-regulon Memory IgA   |                       |                      |
| 0.0381754792536638         | -0.00101760407666217  | 19328755             |
| 0.518487106852215          | 0.0664191455494744    | 0.0857410788002306   |
| 99.7610513739546           | 99.62055726442        |                      |
| CREM-regulon Memory IgA    |                       |                      |
| 0.148158371625168          | -0.00187578693900725  | 17222391.5           |
| 0.461984641116884          | 0.000160299812477496  |                      |
| 0.000295617835997461       | 100 100               |                      |
| CTCF-regulon Memory IgA    |                       |                      |
| 0.367143939166948          | -0.00376577554974733  | 17767721.5           |
| 0.476612928038609          | 0.0202274428479501    | 0.0275641543572578   |
| 100 100                    |                       |                      |
| CUX1-regulon Memory IgA    |                       |                      |
| 0.0760374030576295         | -0.000673077967982508 | 19258649.5           |
| 0.516606551282576          | 0.0991755315392714    | 0.121404529987729    |
| 100 100                    |                       |                      |
| DDIT3-regulon Memory IgA   |                       |                      |
| 0.0817214718258304         | -0.00324654067285823  | 17334824             |
| 0.46500060368877           | 0.000510681536985432  | 0.000873696123517244 |
| 100                        |                       | 100                  |
| E2F1-regulon Memory IgA    |                       |                      |
| 0.424956911216472          | -0.0129773968714213   | 16968154             |
| 0.45516480891205           | 8.5198425902858e-06   | 1.8330570421524e-05  |
| 100                        |                       | 100                  |
| E2F2-regulon Memory IgA    |                       |                      |
| 0.0521925244824719         | -0.00176094963647519  | 18879029.5           |
| 0.506423377275599          | 0.523619457197971     | 0.559052352797834    |
| 100 100                    |                       |                      |
| E2F3-regulon Memory IgA    |                       |                      |
| 0.021037102312448          | -7.96696185042384e-05 | 18644795             |
| 0.500140118564421          | 0.988900948488648     | 0.988900948488648    |
| 100 100                    |                       |                      |
| E2F4-regulon Memory IgA    |                       |                      |
| 0.388306625013098          | -0.0105454161392146   | 16974079.5           |
| 0.455323758381463          | 9.16864640096912e-06  |                      |
| 1.94320565513077e-05       | 100 100               |                      |
| E2F6-regulon Memory IgA    |                       |                      |
| 0.0666008830297811         | -0.00590933925998749  | 17759082.5           |
| 0.476381189878748          | 0.0190213994870075    | 0.0262236769626705   |



|                      |                   |                  |                       |                     |     |
|----------------------|-------------------|------------------|-----------------------|---------------------|-----|
| 100                  | 100               |                  |                       |                     |     |
| E2F7-regulon         | Memory            | IgA              | 0.0325388597366733    |                     |     |
| 0.00200175664421414  |                   |                  | 21313359              | 0.571723416495921   |     |
| 1.0682088161056e-12  |                   |                  | 3.37079226415546e-12  | 100                 | 100 |
| E2F8-regulon         | Memory            | IgA              |                       |                     |     |
| 0.0694744872133794   |                   |                  | -0.00542213970256533  | 16172489.5          |     |
| 0.433821386398287    |                   |                  | 5.00201019469079e-11  |                     |     |
| 1.42057089529219e-10 | 100               | 100              |                       |                     |     |
| EGR1-regulon         | Memory            | IgA              |                       |                     |     |
| 0.0459639561845478   |                   |                  | -0.00152722291809606  | 16991983.5          |     |
| 0.455804026932701    |                   |                  | 1.14282817422901e-05  |                     |     |
| 2.38649412853704e-05 | 100               | 100              |                       |                     |     |
| EGR2-regulon         | Memory            | IgA              |                       |                     |     |
| 0.0432758361223441   |                   |                  | -0.00282416682722567  | 17382869.5          |     |
| 0.466289407457677    |                   |                  | 0.000816544151015251  | 0.00138034844576388 |     |
| 100                  | 99.9955095534251  |                  |                       |                     |     |
| EGR3-regulon         | Memory            | IgA              |                       |                     |     |
| 0.0369081757634262   |                   |                  | -0.00464871676164255  | 15935524            |     |
| 0.427464869565269    |                   |                  | 5.9329190936168e-13   |                     |     |
| 2.00589169355616e-12 | 100               | 99.9955095534251 |                       |                     |     |
| ELF1-regulon         | Memory            | IgA              |                       |                     |     |
| 0.703175550910986    |                   |                  | -0.00394179912457548  | 18889759            |     |
| 0.506711192368344    |                   |                  | 0.505185343756885     | 0.547605487125783   |     |
| 100                  | 100               |                  |                       |                     |     |
| ELF2-regulon         | Memory            | IgA              | 0.0418496081197217    |                     |     |
| 0.00936631598471628  |                   |                  | 24516661              | 0.657650874645911   |     |
| 3.16115538798225e-55 |                   |                  | 5.61105081366849e-54  | 100                 |     |
| 99.5262578863468     |                   |                  |                       |                     |     |
| ELF4-regulon         | Memory            | IgA              | 0.022128435122568     |                     |     |
| 0.00375051475351767  |                   |                  | 22396411.5            | 0.600775921807001   |     |
| 1.43336768109682e-23 |                   |                  | 7.26922181127673e-23  | 99.6415770609319    |     |
| 98.3115920878331     |                   |                  |                       |                     |     |
| ELK1-regulon         | Memory            | IgA              | 0.0677307722272363    |                     |     |
| 0.00170729341992992  |                   |                  | 20032007              | 0.537351596306814   |     |
| 0.000208375049121076 |                   |                  | 0.00036986571218991   | 100                 | 100 |
| ELK3-regulon         | Memory            | IgA              | 0.0767948948506576    |                     |     |
| 0.0121128712582556   |                   |                  | 25739460              | 0.690452031045885   |     |
| 9.43763498862769e-80 |                   |                  | 2.68028833677026e-78  | 100                 | 100 |
| ELK4-regulon         | Memory            | IgA              | 0.0481960826907064    |                     |     |
| 0.00325916753613933  |                   |                  | 19949160.5            | 0.535129267858974   |     |
| 0.000486563536296804 |                   |                  | 0.000842585636026173  | 97.9689366786141    |     |
| 96.7062574373021     |                   |                  |                       |                     |     |
| ESRRA-regulon        | Memory            | IgA              |                       |                     |     |
| 0.0887019251754153   |                   |                  | -0.00309081305314605  | 19001034.5          |     |
| 0.50969611881904     | 0.335684687700437 |                  | 0.384413110108564     | 100                 |     |
| 100                  |                   |                  |                       |                     |     |
| ETS1-regulon         | Memory            | IgA              |                       |                     |     |
| 0.242534012940636    |                   |                  | -0.000412603716969634 | 19547477.5          |     |
| 0.524354261577311    |                   |                  | 0.0156003170788473    | 0.0217180884823168  |     |
| 100                  | 100               |                  |                       |                     |     |

|                      |        |     |                       |                     |                      |
|----------------------|--------|-----|-----------------------|---------------------|----------------------|
| ETV2-regulon         | Memory | IgA | 0.0306865443806063    |                     |                      |
| 0.00212369196964644  |        |     | 21051744              | 0.564705685428445   |                      |
| 1.32191337006688e-10 |        |     | 3.68062154018621e-10  | 100                 | 100                  |
| ETV3-regulon         | Memory | IgA | 0.0117719766505414    |                     |                      |
| 0.000349365449565377 |        |     | 19312700              | 0.518056437080649   |                      |
| 0.0724515548496549   |        |     | 0.0910453167137256    |                     | 86.4994026284349     |
| 84.3081344439704     |        |     |                       |                     |                      |
| ETV5-regulon         | Memory | IgA |                       |                     |                      |
| 0.0329881913499068   |        |     | -0.000484385751216503 |                     | 17982679.5           |
| 0.482379101365072    |        |     | 0.080191079316331     |                     | 0.0998871338852544   |
| 100                  | 100    |     |                       |                     |                      |
| ETV6-regulon         | Memory | IgA | 0.478299365946858     |                     |                      |
| 0.0190763508310668   |        |     | 26718597              | 0.716717039337519   |                      |
| 1.0598006391293e-102 |        |     | 5.01638969187867e-101 | 100                 | 100                  |
| ETV7-regulon         | Memory | IgA | 0.0691992614363216    |                     |                      |
| 0.00521945944634526  |        |     | 23671360              | 0.634975970343524   |                      |
| 5.90393699887737e-41 |        |     | 7.62144594400533e-40  | 100                 | 100                  |
| FLI1-regulon         | Memory | IgA | 0.156761236582049     |                     |                      |
| 0.0130708237747341   |        |     | 23762632.5            | 0.637424323300565   |                      |
| 2.16612797822831e-42 |        |     | 3.0759017290842e-41   | 100                 | 100                  |
| FOS-regulon          | Memory | IgA | 0.08837161783687      | 0.00213344649491135 |                      |
| 20894189             |        |     | 0.560479327542481     |                     | 1.91339409478736e-09 |
| 5.0315178048112e-09  | 100    | 100 |                       |                     |                      |
| FOSB-regulon         | Memory | IgA | 0.047419319077031     |                     |                      |
| 0.00605757442023276  |        |     | 21985125              | 0.589743304989602   |                      |
| 5.07494194914138e-19 |        |     | 2.00178265771688e-18  |                     | 99.8805256869773     |
| 99.3129616740385     |        |     |                       |                     |                      |
| FOSL1-regulon        | Memory | IgA |                       |                     |                      |
| 0.0575707482673738   |        |     | -0.00328352587414474  |                     | 19126118.5           |
| 0.513051453462865    |        |     | 0.195017506748757     |                     | 0.234682084392572    |
| 100                  | 100    |     |                       |                     |                      |
| FOX01-regulon        | Memory | IgA |                       |                     |                      |
| 0.0163442865912668   |        |     | -0.000359326594922584 |                     | 18712917.5           |
| 0.501967480851156    |        |     | 0.836114400359682     |                     | 0.854160034899819    |
| 52.9271206690562     |        |     | 52.331664384023       |                     |                      |
| FOX03-regulon        | Memory | IgA |                       |                     |                      |
| 0.0120390897027962   |        |     | -0.00784961601304603  |                     | 16168791             |
| 0.433722175426619    |        |     | 9.2247698555481e-13   |                     |                      |
| 3.03407216657055e-12 |        |     | 37.037037037037       | 46.9431284941287    |                      |
| GABPA-regulon        | Memory | IgA |                       |                     |                      |
| 0.024614889597078    |        |     | -0.000889443981372546 |                     | 17602147             |
| 0.47217144986407     |        |     | 0.00572558095781532   | 0.00846908850010183 | 100                  |
| 100                  |        |     |                       |                     |                      |
| GTF2B-regulon        | Memory | IgA |                       |                     |                      |
| 0.0782117011839087   |        |     | -0.000861164325599462 |                     | 18456349.5           |
| 0.495085133797201    |        |     | 0.625552709812226     |                     | 0.648383100681286    |
| 100                  | 100    |     |                       |                     |                      |
| HINFP-regulon        | Memory | IgA | 0.016864190006283     |                     |                      |
| 0.00064551671652193  |        |     | 19108656              | 0.512583027995037   |                      |
| 0.199975475173158    |        |     | 0.238626197265449     |                     | 65.4719235364397     |

63.1918094254474  
HIVEP3-regulon Memory IgA 0.0817573445775812  
0.00414585098098103 20496128.5 0.549801493559012  
7.6225450440862e-07 1.77442851845941e-06 99.8805256869773  
99.6901591863311  
HOXB2-regulon Memory IgA 0.0380267661687676  
0.000941406714401474 19690782 0.528198354774411  
0.00501818040521813 0.00750085913201025 89.3667861409797  
83.6233413412964  
IKZF1-regulon Memory IgA 0.145595703780099  
0.00176411129204629 20123058 0.539794007603662  
7.77774135966173e-05 0.00014924855041513 100 100  
IRF1-regulon Memory IgA 0.139647825541106  
0.00428441144466499 22010927 0.590435434634321  
2.72403824641265e-19 1.1051812314017e-18 100 100  
IRF2-regulon Memory IgA 0.0897453557289104  
0.00481372771403608 21581505.5 0.578916352771307  
4.6658385233861e-15 1.74355018505481e-14 100 100  
IRF3-regulon Memory IgA 0.15316987175109 0.00786848400391205  
24981618 0.670123183894007 5.19325465194339e-64  
1.0534888008228e-62 100 100  
IRF4-regulon Memory IgA 0.0586269772720634  
0.000218660595058526 19835258.5 0.532073886462465  
0.00144946005987533 0.00239329451746857 100  
99.9955095534251  
IRF5-regulon Memory IgA 0.0515194146698812  
0.00455874841651373 20129333.5 0.539962345700919  
6.81356469269085e-05 0.000132537833748233 88.2915173237754  
80.331844001886  
IRF7-regulon Memory IgA 0.112747078012137  
0.0050046988426759 22486641 0.603196296653064  
1.22880194106507e-24 6.71114906273999e-24 100 100  
IRF8-regulon Memory IgA  
0.0810405562231054 -0.000746131446870413 18956462  
0.508500477063005 0.398663038832217 0.452881212113398  
100 100  
IRF9-regulon Memory IgA  
0.0337536380825649 -0.000165638395066461 18834779  
0.505236373057181 0.60312046203949 0.638998829054352 100  
100  
JUN-regulon Memory IgA 0.0930687595961783  
0.00475620868751349 21375879 0.573400493675512  
3.1473760498154e-13 1.11731849768447e-12 100 100  
JUNB-regulon Memory IgA 0.16696672640469 0.00731924552695704  
22078875 0.592258116019459 5.17480023567008e-20  
2.22673222262167e-19 100 100  
JUND-regulon Memory IgA  
0.0379960328093972 -0.000470330598755196 18331428  
0.491734158159162 0.411808931560305 0.460447781744593  
100 100

|                       |        |     |                       |                   |     |
|-----------------------|--------|-----|-----------------------|-------------------|-----|
| KLF11-regulon         | Memory | IgA | 0.0314278763963097    |                   |     |
| 0.00966975563072584   |        |     | 21367062.5            | 0.573163994140101 |     |
| 3.43586152564429e-16  |        |     | 1.31862793686889e-15  | 53.1660692951016  |     |
| 40.6273153865152      |        |     |                       |                   |     |
| KLF12-regulon         | Memory | IgA | 0.0475830347479184    |                   |     |
| 0.000543434018142816  |        |     | 18905387.5            | 0.507130421426265 |     |
| 0.47895797061861      |        |     | 0.524730231222343     | 99.6415770609319  |     |
| 98.5832641056153      |        |     |                       |                   |     |
| KLF13-regulon         | Memory | IgA | 0.0705481193018115    |                   |     |
| 0.00433600189374703   |        |     | 24488640              | 0.656899221100657 |     |
| 1.01872228705953e-54  |        |     | 1.60731738624949e-53  | 100               | 100 |
| KLF2-regulon          | Memory | IgA | 0.126827473315417     |                   |     |
| 0.0183169789269556    |        |     | 26728435.5            | 0.716980953666236 |     |
| 6.02102743312049e-103 |        |     | 4.27492947751555e-101 | 100               | 100 |
| KLF3-regulon          | Memory | IgA | 0.0776798950279206    |                   |     |
| 0.00575686823970373   |        |     | 20953055              | 0.562058387447372 |     |
| 7.19323119470424e-10  |        |     | 1.92724307480755e-09  | 100               |     |
| 99.8607961561777      |        |     |                       |                   |     |
| KLF4-regulon          | Memory | IgA | 0.0165499307292395    |                   |     |
| 0.000662356860980425  |        |     | 19020757.5            | 0.51022518141042  |     |
| 0.277376566068516     |        |     | 0.325516300675448     | 51.9713261648746  |     |
| 49.7721098363232      |        |     |                       |                   |     |
| KLF6-regulon          | Memory | IgA | 0.093988193302715     |                   |     |
| 0.025070768569884     |        |     | 28950012              | 0.776573967915518 |     |
| 5.12892523372085e-166 |        |     | 7.2830738318836e-164  | 100               | 100 |
| KLF7-regulon          | Memory | IgA | 0.0535010189328942    |                   |     |
| 0.00764326774601822   |        |     | 22153771              | 0.594267175079642 |     |
| 7.98429853349516e-21  |        |     | 3.6573238443752e-20   | 100               |     |
| 97.5100473742114      |        |     |                       |                   |     |
| KLF8-regulon          | Memory | IgA | 0.0335894955966641    |                   |     |
| 0.00864218455402076   |        |     | 22705625              | 0.609070466024393 |     |
| 1.27666271779707e-27  |        |     | 7.88200460552971e-27  | 88.5304659498208  |     |
| 77.4310155144929      |        |     |                       |                   |     |
| MAFB-regulon          | Memory | IgA | 0.0567118182108428    |                   |     |
| 0.000946369444749705  |        |     | 19598480.5            | 0.525722399251506 |     |
| 0.0106500120784982    |        |     | 0.0152757749004721    | 100               |     |
| 99.9977547767125      |        |     |                       |                   |     |
| MAFF-regulon          | Memory | IgA | 0.013632740139663     |                   |     |
| 0.00126921106046931   |        |     | 19134142.5            | 0.51326669446237  |     |
| 0.0983716114854646    |        |     | 0.121404529987729     | 30.8243727598566  |     |
| 28.5031096342531      |        |     |                       |                   |     |
| MAFG-regulon          | Memory | IgA | 0.0273083179226617    |                   |     |
| 0.00193668918240611   |        |     | 19519677              | 0.523608522867599 |     |
| 0.0150177277302743    |        |     | 0.0211140330465242    | 62.962962962963   |     |
| 58.5194997642516      |        |     |                       |                   |     |
| MAX-regulon           | Memory | IgA | 0.205905669040675     |                   |     |
| 0.00839022409110121   |        |     | 25462073              | 0.683011221583071 |     |
| 8.72837298572647e-74  |        |     | 2.06571493995527e-72  | 100               | 100 |
| MAZ-regulon           | Memory | IgA |                       |                   |     |
| 0.133068741337269     |        |     | -0.0032958669264358   | 17215819          |     |

|                      |                     |                      |                    |                     |
|----------------------|---------------------|----------------------|--------------------|---------------------|
| 0.461808336098284    |                     | 0.000149408472799539 |                    |                     |
| 0.000279157936020191 |                     | 100                  | 100                |                     |
| MEF2A-regulon        | Memory              | IgA                  | 0.0426664664399351 |                     |
| 0.0019480853152132   |                     | 20053024             | 0.537915369996569  |                     |
| 0.000166804282923541 |                     | 0.000303669335578755 |                    | 100                 |
| 99.9977547767125     |                     |                      |                    |                     |
| MLX-regulon          | Memory              | IgA                  | 0.0538603014730844 |                     |
| 0.000952411760375985 |                     | 19502905.5           | 0.523158633233602  |                     |
| 0.0214810743561519   |                     | 0.0285075940053605   |                    | 100                 |
| 99.9887738835627     |                     |                      |                    |                     |
| MXD4-regulon         | Memory              | IgA                  |                    |                     |
| 0.0899127970189214   |                     | -0.00229873469214022 |                    | 21317974.5          |
| 0.571847225672543    |                     | 9.40135037528904e-13 |                    |                     |
| 3.03407216657055e-12 |                     | 93.5483870967742     | 88.511192438088    |                     |
| MXI1-regulon         | Memory              | IgA                  | 0.0666881662625049 |                     |
| 0.0014860257326863   |                     | 19555925             | 0.524580862816508  |                     |
| 0.0146615191455369   |                     | 0.0208193571866623   |                    | 100 100             |
| MYBL1-regulon        | Memory              | IgA                  |                    |                     |
| 0.0210248437962526   |                     | -0.00903197785703773 |                    | 17005550.5          |
| 0.456167956972616    |                     | 1.24565537830473e-05 |                    |                     |
| 2.56352266259815e-05 |                     | 79.3309438470729     | 80.0736433238286   |                     |
| MYC-regulon          | Memory              | IgA                  | 0.30155762351411   | -0.0135745296502531 |
|                      | 17570016.5          | 0.471309560415592    |                    | 0.0043901893146875  |
|                      | 0.00663198811367687 | 100                  | 100                |                     |
| NFATC1-regulon       | Memory              | IgA                  |                    |                     |
| 0.036726571997613    |                     | -0.014050442859281   |                    | 14481638.5          |
| 0.388464898455418    |                     | 1.65712204275871e-28 |                    |                     |
| 1.17655665035869e-27 |                     | 91.9952210274791     | 94.8808909046005   |                     |
| NFE2L1-regulon       | Memory              | IgA                  | 0.190357401384261  |                     |
| 0.00783477817931941  |                     | 20524205.5           | 0.550554649284722  |                     |
| 5.17867271720433e-07 |                     | 1.24639241668308e-06 |                    | 100                 |
| 99.9348885246638     |                     |                      |                    |                     |
| NFE2L2-regulon       | Memory              | IgA                  |                    |                     |
| 0.107487806574224    |                     | -0.00345647981222656 |                    | 17959037.5          |
| 0.481744912966481    |                     | 0.0699017141301159   |                    | 0.0894238144727608  |
|                      | 100                 | 100                  |                    |                     |
| NFKB1-regulon        | Memory              | IgA                  |                    |                     |
| 0.0553931179070064   |                     | -0.00129965196004114 |                    | 19038865.5          |
| 0.510710922190459    |                     | 0.287561339236175    |                    | 0.334702542389647   |
|                      | 100                 | 99.9303980780889     |                    |                     |
| NFKB2-regulon        | Memory              | IgA                  | 0.0807779701582164 |                     |
| 0.00754046773913054  |                     | 23306706.5           | 0.625194267475516  |                     |
| 1.78418769317708e-35 |                     | 1.68903101620764e-34 |                    | 100 100             |
| NFYA-regulon         | Memory              | IgA                  | 0.0251329847575693 |                     |
| 0.00426321744230872  |                     | 22787929             | 0.611278242099074  |                     |
| 2.22100782122783e-28 |                     | 1.50182433625882e-27 |                    | 100                 |
| 98.9986304137947     |                     |                      |                    |                     |
| NFYB-regulon         | Memory              | IgA                  |                    |                     |
| 0.0998705538261479   |                     | -0.00891885904089237 |                    | 14862777            |
| 0.398688805694916    |                     | 8.36828261747132e-24 |                    |                     |

|                      |        |     |                       |                     |
|----------------------|--------|-----|-----------------------|---------------------|
| 4.40109678400344e-23 | 100    | 100 |                       |                     |
| NFYC-regulon         | Memory | IgA |                       |                     |
| 0.0806820697238969   |        |     | -0.00290627786698537  | 17040605            |
| 0.457108281700574    |        |     | 2.05601553940659e-05  |                     |
| 4.11203107881318e-05 | 100    | 100 |                       |                     |
| NR1H3-regulon        | Memory | IgA | 0.0117576740177399    |                     |
| 0.00328385941870543  |        |     | 19860498.5            | 0.53275094065333    |
| 7.53569802323965e-06 |        |     | 1.64626018353851e-05  | 27.9569892473118    |
| 21.9942073239184     |        |     |                       |                     |
| NR2C2-regulon        | Memory | IgA | 0.0308628871739341    |                     |
| 0.00924729310506123  |        |     | 23388057              | 0.627376466245482   |
| 3.74042085199146e-37 |        |     | 4.08569046909837e-36  | 89.4862604540024    |
| 75.7246458160264     |        |     |                       |                     |
| NR3C1-regulon        | Memory | IgA | 0.232461312093888     |                     |
| 0.0071149685591588   |        |     | 22830740              | 0.612426632232399   |
| 6.19768474883046e-29 |        |     | 4.88928463518848e-28  | 100 100             |
| NRF1-regulon         | Memory | IgA | 0.0273257532039983    |                     |
| 0.000607798621155724 |        |     | 19751124              | 0.529817007864156   |
| 0.00307109440117413  |        |     | 0.00484550449963029   | 100                 |
| 99.9663216506882     |        |     |                       |                     |
| PAX5-regulon         | Memory | IgA | 0.102514693159256     |                     |
| 0.00228924116524128  |        |     | 19738043.5            | 0.529466128016945   |
| 0.00343691278381531  |        |     | 0.00530480016632362   | 100 100             |
| POU2F1-regulon       | Memory | IgA |                       |                     |
| 0.00443172214203206  |        |     | -0.000456682641045352 | 18474381.5          |
| 0.495568835903765    |        |     | 0.514512933737306     | 0.553491186293162   |
| 17.3237753882915     |        |     | 18.3659264913896      |                     |
| POU6F1-regulon       | Memory | IgA | 0.0350855814485713    |                     |
| 0.00416018992468319  |        |     | 20414285.5            | 0.547606083648436   |
| 1.37722140633978e-06 |        |     | 3.15428128548788e-06  | 73.4767025089606    |
| 65.2012842677204     |        |     |                       |                     |
| REL-regulon          | Memory | IgA |                       |                     |
| 0.260678901014787    |        |     | -0.00309008023753005  | 17615216            |
| 0.472522021227795    |        |     | 0.00636639339090594   | 0.00931987486091385 |
| 100 100              |        |     |                       |                     |
| RELA-regulon         | Memory | IgA | 0.0967823237776879    |                     |
| 0.00480652262582351  |        |     | 23200348.5            | 0.622341251246039   |
| 5.93155341679303e-34 |        |     | 5.26425365740382e-33  | 100 100             |
| RELB-regulon         | Memory | IgA |                       |                     |
| 0.100080639141134    |        |     | -0.00519893864207364  | 15097441.5          |
| 0.404983599006018    |        |     | 3.94060188467237e-21  |                     |
| 1.86521822541159e-20 | 100    | 100 |                       |                     |
| REST-regulon         | Memory | IgA | 0.224566814534639     |                     |
| 0.00606012679092696  |        |     | 23458067              | 0.629254460060952   |
| 1.0619832885566e-37  |        |     | 1.25668022479198e-36  | 100 100             |
| RFX5-regulon         | Memory | IgA |                       |                     |
| 0.0649145646594927   |        |     | -0.00044206408711106  | 20139410            |
| 0.540232644296571    |        |     | 6.477632223713e-05    |                     |
| 0.000127753302189895 | 100    | 100 |                       |                     |
| RXRA-regulon         | Memory | IgA | 0.0145360900438558    |                     |

|                      |                       |                     |                    |  |
|----------------------|-----------------------|---------------------|--------------------|--|
| 6.06311570586562e-06 | 18772297.5            | 0.503560328626653   |                    |  |
| 0.717458102947442    | 0.738253989989397     | 66.1887694145759    |                    |  |
| 64.2268573609645     |                       |                     |                    |  |
| SETDB1-regulon       | Memory IgA            |                     |                    |  |
| 0.0586926859678198   | -0.00104410029275558  | 18328188.5          |                    |  |
| 0.491647259702295    | 0.40688150678263      | 0.458548999707409   |                    |  |
| 94.9820788530466     | 95.0537730977346      |                     |                    |  |
| S0X5-regulon         | Memory IgA            | 0.00855247785998533 |                    |  |
| 0.000763253211333401 | 19195053              | 0.5149005973662     | 0.0429892236352841 |  |
|                      | 0.0565228681130587    | 25.5675029868578    | 22.4365163115472   |  |
| SP1-regulon          | Memory IgA            |                     |                    |  |
| 0.012938817116608    | -5.60912651644055e-05 | 18821586.5          |                    |  |
| 0.50488248884906     | 0.616152732523105     | 0.643335941310889   |                    |  |
| 61.6487455197133     | 59.7880509216642      |                     |                    |  |
| SP2-regulon          | Memory IgA            |                     |                    |  |
| 0.0279917758810621   | -0.000253048879078215 | 18274958            |                    |  |
| 0.490219370118031    | 0.331489596097165     | 0.382695306063394   |                    |  |
|                      | 100                   | 100                 |                    |  |
| SP3-regulon          | Memory IgA            | 0.0302602179940825  |                    |  |
| 0.00202772076792346  | 21121829              | 0.566585691092738   |                    |  |
| 3.8097292641483e-11  | 1.10404399083481e-10  | 100                 | 100                |  |
| SP4-regulon          | Memory IgA            | 0.00986225093156292 |                    |  |
| 0.0012473347983586   | 19194150.5            | 0.514876388118686   |                    |  |
| 0.0653281112794405   | 0.0851063468044087    | 31.5412186379928    |                    |  |
| 28.9678708547565     |                       |                     |                    |  |
| SPI1-regulon         | Memory IgA            | 0.429622508421086   |                    |  |
| 0.0112877430204441   | 22663954.5            | 0.607952669405517   |                    |  |
| 8.32325844418475e-27 | 4.92459457947598e-26  | 100                 | 100                |  |
| SPIB-regulon         | Memory IgA            | 0.564557985599573   |                    |  |
| 0.000108771920418471 | 18569662              | 0.498124702061955   |                    |  |
| 0.852290214623843    | 0.864465789118469     | 100                 | 100                |  |
| SREBF1-regulon       | Memory IgA            | 0.0430221475353781  |                    |  |
| 0.0021315864153849   | 19995758              | 0.536379229533254   |                    |  |
| 0.000303670185976488 | 0.000532360079119275  | 97.0131421744325    |                    |  |
| 96.892610970161      |                       |                     |                    |  |
| SREBF2-regulon       | Memory IgA            | 0.103979697070484   |                    |  |
| 0.00509097046699537  | 22802774.5            | 0.611676467455274   |                    |  |
| 1.42883438492575e-28 | 1.06786569820766e-27  | 100                 | 100                |  |
| SRF-regulon          | Memory IgA            | 0.0227237617781819  |                    |  |
| 0.00199131720609354  | 20512051              | 0.550228609064323   |                    |  |
| 6.12537630613176e-07 | 1.44967239245118e-06  | 98.9247311827957    |                    |  |
| 97.9164327892409     |                       |                     |                    |  |
| STAT1-regulon        | Memory IgA            | 0.0835864183757783  |                    |  |
| 0.00388965624010132  | 22254215              | 0.596961550323193   |                    |  |
| 6.13104776614601e-22 | 3.00209925100943e-21  | 100                 | 100                |  |
| STAT2-regulon        | Memory IgA            |                     |                    |  |
| 0.0637147590625279   | -0.0025669451294878   | 17551512.5          |                    |  |
| 0.470813197073763    | 0.00375601204460711   | 0.00573498613262591 |                    |  |
|                      | 100                   | 99.9618312041133    |                    |  |
| STAT5A-regulon       | Memory IgA            |                     |                    |  |

|                      |                       |                     |     |
|----------------------|-----------------------|---------------------|-----|
| 0.0674679552955786   | -0.00421767169976621  | 17040196            |     |
| 0.457097310418322    | 2.04602069447695e-05  |                     |     |
| 4.11203107881318e-05 | 100                   | 100                 |     |
| TBP-regulon          | Memory IgA            |                     |     |
| 0.0206404104906995   | -0.000265756877665457 | 18819880            |     |
| 0.504836712582153    | 0.607498886777025     | 0.638998829054352   |     |
| 52.3297491039427     | 49.8394665349469      |                     |     |
| TCF12-regulon        | Memory IgA            | 0.0115046432675501  |     |
| 0.00250717702483704  | 19725719.5            | 0.529135541018204   |     |
| 0.000149118183306647 | 0.000279157936020191  | 30.5854241338112    |     |
| 25.119558140057      |                       |                     |     |
| TFDP1-regulon        | Memory IgA            |                     |     |
| 0.517266814138158    | -0.0111012606149384   | 16154724.5          |     |
| 0.433344846473536    | 3.63619438890917e-11  |                     |     |
| 1.07570750671896e-10 | 100                   | 100                 |     |
| TFDP2-regulon        | Memory IgA            |                     |     |
| 0.0254022330856314   | -0.00175326106780611  | 17438790.5          |     |
| 0.467789468765417    | 0.00138296125393617   | 0.00231035880069336 |     |
| 100                  | 99.9955095534251      |                     |     |
| TFEC-regulon         | Memory IgA            | 0.107973559036128   |     |
| 0.016740812573947    | 26020049              | 0.697978733041154   |     |
| 5.0052064566923e-86  | 1.77684829212577e-84  | 100                 | 100 |
| THAP1-regulon        | Memory IgA            | 0.0380313773075011  |     |
| 0.000882543557526046 | 19822555              | 0.531733119508675   |     |
| 0.00162834256189765  | 0.00262979361403482   | 100                 | 100 |
| THAP11-regulon       | Memory IgA            | 0.181360908451057   |     |
| 0.00293738107213157  | 21370253.5            | 0.573249591601395   |     |
| 3.51710608577045e-13 | 1.21811966873025e-12  | 100                 | 100 |
| TP53-regulon         | Memory IgA            |                     |     |
| 0.0938341615891465   | -0.00460752032412269  | 16688777            |     |
| 0.447670618393776    | 2.03857482725711e-07  | 4.990993542595e-07  |     |
| 100                  | 100                   |                     |     |
| USF2-regulon         | Memory IgA            | 0.129815485552065   |     |
| 0.00461439703092376  | 22129165.5            | 0.593607141129827   |     |
| 1.48239783571958e-20 | 6.57814039600563e-20  | 100                 | 100 |
| XBP1-regulon         | Memory IgA            | 0.196723978294932   |     |
| 0.00146106222930681  | 22784177              | 0.611177596008578   |     |
| 2.48253194975136e-28 | 1.60236153120315e-27  | 100                 | 100 |
| YBX1-regulon         | Memory IgA            |                     |     |
| 0.093584192170145    | -0.00162962976553586  | 17538256.5          |     |
| 0.470457609500304    | 0.00335418690212426   | 0.00523400593518291 |     |
| 100                  | 100                   |                     |     |
| YY1-regulon          | Memory IgA            |                     |     |
| 0.637119468799092    | -0.00239606084939026  | 17768795.5          |     |
| 0.476641737713767    | 0.0203819451233244    | 0.0275641543572578  |     |
| 100                  | 100                   |                     |     |
| YY2-regulon          | Memory IgA            | 0.0535203722075922  |     |
| 0.00256564073057542  | 19805822.5            | 0.531284276036067   |     |
| 0.00188654059402039  | 0.00300998611630219   | 93.7873357228196    |     |
| 90.4690271447495     |                       |                     |     |



ZBTB33-regulon Memory IgA 0.3699737956224 0.00422572913471841  
20428480.5 0.54798685956917 1.89213303239896e-06  
4.26480778731194e-06 100 100  
ZNF143-regulon Memory IgA 0.0255060550815819  
0.00221619897295699 21527731 0.577473870576907  
1.44419899001234e-14 5.25836555337828e-14 100  
99.9932643301376  
ZNF274-regulon Memory IgA 0.0682573900015716  
0.0029706555620192 20987349.5 0.562978325440582  
4.02333676805797e-10 1.09868042512352e-09 100 100  
ZNF76-regulon Memory IgA 0.0148122777941818  
0.000259966452457627 19049550 0.51099753017391 0.274857690484904  
0.325248267073803 99.2831541218638 99.463391634298  
ATF1-regulon Memory LGALS1  
0.102954513387177 -0.00338231626530371 29188850  
0.448707802818064 1.7265889330351e-11  
2.95392323483113e-11 100 100  
ATF3-regulon Memory LGALS1  
0.0483138178616031 -0.0027993925747915 30907499  
0.47512786447193 0.00110545913106615 0.001414190960463 100  
100  
ATF4-regulon Memory LGALS1  
0.10391494719045 -0.00499999744046492 29093177.5  
0.447237070080559 4.5051901908782e-12  
7.89798774203339e-12 100 100  
ATF5-regulon Memory LGALS1 0.119396447361146  
0.000995519938073536 33755646 0.518911219502117  
0.0131241223445973 0.0156607174196035 100  
99.9977217842985  
ATF6-regulon Memory LGALS1 0.137803457198732  
0.00143642597918742 42065220 0.646650773883126  
1.89907182756937e-82 1.03718538274942e-81 100 100  
ATF6B-regulon Memory LGALS1 0.0596676770004826  
0.00245122362064725 39657228.65625 0.609633744947111  
6.85272326908272e-47 2.3168731052613e-46 99.9325236167341  
99.9202624504488  
BACH1-regulon Memory LGALS1 0.0482587993902809  
0.0051439677280216 37047139 0.569509944426909  
7.73165871710107e-20 1.66347808761871e-19 99.9325236167341  
99.5511915068119  
BATF-regulon Memory LGALS1  
0.012416580517517 -0.00710895434358909 29123201.5  
0.447698616289876 3.29205576336804e-13  
5.99322972305465e-13 45.27665317139 51.9342051305418  
BATF3-regulon Memory LGALS1  
0.0684312134487346 -0.0152298138672322 24856940  
0.382115188922497 6.29159230500963e-54  
2.35106870345097e-53 100 100  
BCL11A-regulon Memory LGALS1 0.22015782252895 0.0161861371365232  
43885732 0.674636732203646 4.11908309297987e-116

|                       |                       |                      |                    |
|-----------------------|-----------------------|----------------------|--------------------|
| 3.44064587766554e-115 | 100                   | 100                  |                    |
| BHLHE40-regulon       | Memory                | LGALS1               | 0.0652187686290279 |
| 0.00989062438634428   | 43157061.5            | 0.663435189866988    |                    |
| 6.16140717394403e-102 | 4.37459909350026e-101 | 100                  | 100                |
| BRF2-regulon          | Memory                | LGALS1               |                    |
| 0.0405402400738156    | -0.00110829255640754  | 31354733             |                    |
| 0.482003002940405     | 0.0182515749031449    | 0.0212436363626769   |                    |
| 99.6626180836707      | 99.7311705472274      |                      |                    |
| CEBPB-regulon         | Memory                | LGALS1               |                    |
| 0.137101524405049     | -0.0061927548328406   | 27846031.5           |                    |
| 0.428065223932001     | 3.9128924592733e-21   |                      |                    |
| 8.81953538439379e-21  | 100                   | 100                  |                    |
| CEBPG-regulon         | Memory                | LGALS1               |                    |
| 0.0584983991530165    | -0.00988518918937403  | 25645408.5           |                    |
| 0.394235980533892     | 9.37019320596144e-44  |                      |                    |
| 2.71544374540107e-43  | 100                   | 100                  |                    |
| CLOCK-regulon         | Memory                | LGALS1               |                    |
| 0.0150413313637476    | -0.000572080209643432 | 32194190.5           |                    |
| 0.494907626808222     | 0.477222102985555     | 0.491054627709774    |                    |
| 51.0121457489879      | 51.0958217524035      |                      |                    |
| CREB1-regulon         | Memory                | LGALS1               | 0.0463706495811815 |
| 0.00351422946853953   | 36694134.5            | 0.564083356069373    |                    |
| 4.27374587104829e-17  | 8.66959876698368e-17  | 100                  |                    |
| 99.9931653528956      |                       |                      |                    |
| CREB3-regulon         | Memory                | LGALS1               | 0.240748040468755  |
| 0.000980035331324736  | 38444174.5            | 0.590985978243378    |                    |
| 7.90162733326931e-33  | 2.04005651149862e-32  | 100                  | 100                |
| CREB3L2-regulon       | Memory                | LGALS1               |                    |
| 0.126463170727607     | -0.00032463483972664  | 39278708.5           |                    |
| 0.603814915235311     | 3.20389719294506e-42  |                      |                    |
| 9.09906802796397e-42  | 100                   | 100                  |                    |
| CREB3L4-regulon       | Memory                | LGALS1               |                    |
| 0.00963719728021788   | -0.00151358156982066  | 31534168.5           |                    |
| 0.484761388726503     | 0.0150919444282312    | 0.0177112075108168   |                    |
| 28.7449392712551      | 31.4348202487812      |                      |                    |
| CREB5-regulon         | Memory                | LGALS1               |                    |
| 0.0330994220141944    | -0.00627999820632929  | 28445767             |                    |
| 0.43728470323581      | 1.94053972552169e-16  | 3.88107945104339e-16 |                    |
| 99.7300944669366      | 99.6195379778557      |                      |                    |
| CREM-regulon          | Memory                | LGALS1               |                    |
| 0.147387968050106     | -0.0026997655055003   | 28994410             |                    |
| 0.445718759221624     | 1.08324102229992e-12  |                      |                    |
| 1.92275281458237e-12  | 100                   | 100                  |                    |
| CTCF-regulon          | Memory                | LGALS1               |                    |
| 0.368367927116255     | -0.00255579805947209  | 32108842             |                    |
| 0.493595600541041     | 0.400910533663938     | 0.430234932797147    |                    |
| 100                   | 100                   |                      |                    |
| CUX1-regulon          | Memory                | LGALS1               | 0.0777689290291464 |
| 0.00110701924790589   | 36084174              | 0.554706692180223    |                    |
| 7.21509951310146e-13  | 1.29689130488659e-12  | 100                  | 100                |

|                       |        |        |                       |     |                      |
|-----------------------|--------|--------|-----------------------|-----|----------------------|
| DDIT3-regulon         | Memory | LGALS1 |                       |     |                      |
| 0.0808571029003349    |        |        | -0.00418779968541756  |     | 29515806.5           |
| 0.453733966326804     |        |        | 1.29332279514997e-09  |     |                      |
| 2.08695269217382e-09  |        |        | 100                   | 100 |                      |
| E2F1-regulon          | Memory | LGALS1 |                       |     |                      |
| 0.425783256061492     |        |        | -0.0123138482610062   |     | 30131505.5           |
| 0.463198845740939     |        |        | 1.387330269794e-06    |     |                      |
| 2.05209269073696e-06  |        |        | 100                   | 100 |                      |
| E2F2-regulon          | Memory | LGALS1 |                       |     |                      |
| 0.052906057190023     |        |        | -0.00104920207137947  |     | 34448249             |
| 0.529558311468919     |        |        | 0.000105817822404814  |     |                      |
| 0.000141755950768713  |        |        | 100                   | 100 |                      |
| E2F3-regulon          | Memory | LGALS1 |                       |     |                      |
| 0.0201515804726428    |        |        | -0.000996260175458154 |     | 30228957             |
| 0.464696926290406     |        |        | 3.65085125294863e-06  |     |                      |
| 5.29000895835413e-06  |        |        | 100                   | 100 |                      |
| E2F4-regulon          | Memory | LGALS1 |                       |     |                      |
| 0.379286932954361     |        |        | -0.020024600999721    |     | 25820243             |
| 0.396923637099731     |        |        | 1.20098343282279e-41  |     |                      |
| 3.34391465609483e-41  |        |        | 100                   | 100 |                      |
| E2F6-regulon          | Memory | LGALS1 |                       |     |                      |
| 0.0603757003710466    |        |        | -0.0124315384704817   |     | 25597100             |
| 0.39349335446632      |        |        | 2.39816847101522e-44  |     | 7.09458172675337e-44 |
|                       |        |        | 100                   |     | 100                  |
| E2F7-regulon          | Memory | LGALS1 |                       |     |                      |
| 0.00213584773958107   |        |        | 0.0326401172627778    |     |                      |
| 1.05110636873029e-23  |        |        | 37503350              |     | 0.576523082506396    |
|                       |        |        | 2.44683777638855e-23  |     | 100                  |
|                       |        |        |                       |     | 100                  |
| E2F8-regulon          | Memory | LGALS1 |                       |     |                      |
| 0.0688088971604364    |        |        | -0.00618987776130898  |     | 26693567.5           |
| 0.410348883984832     |        |        | 6.37941161382271e-32  |     |                      |
| 1.61763651636219e-31  |        |        | 100                   | 100 |                      |
| EGR1-regulon          | Memory | LGALS1 |                       |     |                      |
| 0.000549836542076423  |        |        | 0.0479948867806114    |     |                      |
| 0.00521797312627233   |        |        | 33910823              |     | 0.521296689663425    |
|                       |        |        | 0.00638751882698854   |     | 100                  |
|                       |        |        |                       |     | 100                  |
| EGR2-regulon          | Memory | LGALS1 |                       |     |                      |
| 0.000958456994956267  |        |        | 0.0469750620932189    |     |                      |
| 6.77452231251483e-06  |        |        | 34757635.5            |     | 0.534314378824658    |
| 99.9954435685971      |        |        | 9.61982168377106e-06  |     | 100                  |
| EGR3-regulon          | Memory | LGALS1 |                       |     |                      |
| 0.0368784638968594    |        |        | -0.00474774232250722  |     | 27373970             |
| 0.420808422843229     |        |        | 2.84989119839196e-25  |     | 6.859060172401e-25   |
|                       |        |        | 100                   |     | 99.9954435685971     |
| ELF1-regulon          | Memory | LGALS1 |                       |     |                      |
| 0.706980368054765     |        |        | -6.64420762142015e-05 |     | 35315852.5           |
| 0.542895611849108     |        |        | 1.84263710956221e-08  |     |                      |
| 2.90727188397594e-08  |        |        | 100                   | 100 |                      |
| ELF2-regulon          | Memory | LGALS1 |                       |     |                      |
| 0.0159305228583886    |        |        | 0.0480662870403589    |     |                      |
| 4.73420407567224e-229 |        |        | 48551217.5            |     | 0.746357260685739    |
| 99.5192964869914      |        |        | 1.1204282979091e-227  |     | 100                  |

|                       |        |        |                       |                     |     |
|-----------------------|--------|--------|-----------------------|---------------------|-----|
| ELF4-regulon          | Memory | LGALS1 | 0.0247976291804093    |                     |     |
| 0.00656494113490518   |        |        | 43476077.5            | 0.668339287439308   |     |
| 4.99424896351887e-108 |        |        | 3.73254396220884e-107 | 99.7975708502024    |     |
| 98.2867817925001      |        |        |                       |                     |     |
| ELK1-regulon          | Memory | LGALS1 | 0.0685965686891213    |                     |     |
| 0.00262740971168615   |        |        | 36229402              | 0.556939220587052   |     |
| 8.13527299366549e-14  |        |        | 1.52001153302697e-13  | 100                 | 100 |
| ELK3-regulon          | Memory | LGALS1 | 0.0833652420146409    |                     |     |
| 0.0190830465640942    |        |        | 51697940              | 0.794730490157032   | 0 0 |
| 100                   | 100    |        |                       |                     |     |
| ELK4-regulon          | Memory | LGALS1 | 0.0480814623972519    |                     |     |
| 0.00318856910867811   |        |        | 34888491.5            | 0.536325972575202   |     |
| 1.89251703467871e-06  |        |        | 2.77048885489048e-06  | 97.9082321187584    |     |
| 96.6897525857748      |        |        |                       |                     |     |
| ESRRA-regulon         | Memory | LGALS1 |                       |                     |     |
| 0.0853328927165883    |        |        | -0.0066190126082336   | 31107770.5          |     |
| 0.478206553242885     |        |        | 0.00425764024457069   | 0.00530337644499156 |     |
| 100                   | 100    |        |                       |                     |     |
| ETS1-regulon          | Memory | LGALS1 | 0.255244673740465     |                     |     |
| 0.0127211461134305    |        |        | 41161598              | 0.632759776389286   |     |
| 6.61020195510423e-68  |        |        | 3.23671957801655e-67  | 100                 | 100 |
| ETV2-regulon          | Memory | LGALS1 | 0.0308595321291157    |                     |     |
| 0.00233372690373274   |        |        | 37320405              | 0.573710746666288   |     |
| 4.12935452026995e-22  |        |        | 9.45755390126343e-22  | 100                 | 100 |
| ETV3-regulon          | Memory | LGALS1 |                       |                     |     |
| 0.0107019591752015    |        |        | -0.000751645445911308 | 31528397            |     |
| 0.484672665906524     |        |        | 0.0439897737035819    | 0.0495757767135606  |     |
| 84.7503373819163      |        |        | 84.3349888367431      |                     |     |
| ETV5-regulon          | Memory | LGALS1 | 0.0339963866978697    |                     |     |
| 0.000550731652064818  |        |        | 34005597              | 0.522753610141768   |     |
| 0.00284182565191814   |        |        | 0.00357114373957854   | 100                 | 100 |
| ETV6-regulon          | Memory | LGALS1 | 0.479934027791853     |                     |     |
| 0.0210465212909147    |        |        | 47904075.5            | 0.736409021377534   |     |
| 4.30247660237645e-211 |        |        | 7.6368959692182e-210  | 100                 | 100 |
| ETV7-regulon          | Memory | LGALS1 | 0.073092837418391     |                     |     |
| 0.00932119214569536   |        |        | 45829661.5            | 0.704519935371233   |     |
| 1.66427792089774e-158 |        |        | 1.96939553972899e-157 | 100                 | 100 |
| FLI1-regulon          | Memory | LGALS1 | 0.171283805552733     |                     |     |
| 0.028275789623106     |        |        | 49984232.5            | 0.768386392085411   |     |
| 1.90353512207259e-271 |        |        | 6.75754968335769e-270 | 100                 | 100 |
| FOS-regulon           | Memory | LGALS1 | 0.0899930378206607    |                     |     |
| 0.00384096064658816   |        |        | 38539410              | 0.592449993165353   |     |
| 7.72123814123802e-34  |        |        | 2.10849195395346e-33  | 100                 | 100 |
| FOSB-regulon          | Memory | LGALS1 | 0.0489775296215195    |                     |     |
| 0.00775740804596195   |        |        | 39487247.5            | 0.607020696774901   |     |
| 9.28466245776947e-45  |        |        | 2.86613493261579e-44  | 99.9325236167341    |     |
| 99.3028659953524      |        |        |                       |                     |     |
| FOSL1-regulon         | Memory | LGALS1 |                       |                     |     |
| 0.0524337916790822    |        |        | -0.00864217207497278  | 27852494            |     |
| 0.428164569201709     |        |        | 4.43036308481529e-21  |                     |     |

|                       |        |                       |                    |
|-----------------------|--------|-----------------------|--------------------|
| 9.82986809443392e-21  | 100    | 100                   |                    |
| FOX01-regulon         | Memory | LGALS1                | 0.0174414156564089 |
| 0.000769564889247537  |        | 33588688.5            | 0.516344652714148  |
| 0.0231995871512221    |        | 0.026783263215232     | 55.7354925775978   |
| 52.2280949560304      |        |                       |                    |
| FOX03-regulon         | Memory | LGALS1                |                    |
| 0.0140035155506281    |        | -0.00593421106150809  | 29145257           |
| 0.448037666130656     |        | 1.4011356756659e-13   |                    |
| 2.58391254473452e-13  |        | 38.191632928475       | 47.0497106666059   |
| GABPA-regulon         | Memory | LGALS1                |                    |
| 0.0250854194546905    |        | -0.00041609747727081  | 31841291.5         |
| 0.489482660257409     |        | 0.16775698275743      | 0.186105402746524  |
| 100                   |        |                       | 100                |
| GTF2B-regulon         | Memory | LGALS1                |                    |
| 0.0738828922411545    |        | -0.0053487818946618   | 27864518.5         |
| 0.428349416736812     |        | 5.57970907601423e-21  |                    |
| 1.21895182891388e-20  | 100    | 100                   |                    |
| HINFP-regulon         | Memory | LGALS1                |                    |
| 0.0159927492932066    |        | -0.000245825577364592 | 32407693           |
| 0.498189710126721     |        | 0.807567658461818     | 0.813295088663675  |
| 63.697705802969       |        | 63.2182074998861      |                    |
| HIVEP3-regulon        | Memory | LGALS1                | 0.0813979846607209 |
| 0.00383527911000275   |        | 35593511              | 0.547163938126736  |
| 6.17126888945298e-10  |        | 1.01897695616549e-09  | 99.6626180836707   |
| 99.694719096004       |        |                       |                    |
| H0XB2-regulon         | Memory | LGALS1                | 0.0373788718628672 |
| 0.000285470944279193  |        | 33737654              | 0.51863463612222   |
| 0.0169334088407526    |        | 88.191632928475       | 83.5786212238575   |
| 0.0143099229640163    |        |                       |                    |
| IKZF1-regulon         | Memory | LGALS1                | 0.148931401942145  |
| 0.0052383558718149    |        | 39851483.5            | 0.612619942215103  |
| 2.24800510790082e-49  |        | 7.78577378833943e-49  | 100                |
| 100                   |        |                       | 100                |
| IRF1-regulon          | Memory | LGALS1                | 0.142048480816739  |
| 0.00682907766713153   |        | 41270684.5            | 0.634436716855666  |
| 1.3835856850875e-69   |        | 7.01675597437233e-69  | 100                |
| 100                   |        |                       | 100                |
| IRF2-regulon          | Memory | LGALS1                | 0.092034635471168  |
| 0.00725103604684318   |        | 40051634.5            | 0.6156967785907    |
| 5.19998274448279e-52  |        | 1.89332705055527e-51  | 100                |
| 100                   |        |                       | 100                |
| IRF3-regulon          | Memory | LGALS1                | 0.157530702256785  |
| 0.0124921732828323    |        | 48832415.5            | 0.750679998194645  |
| 4.38236816365838e-237 |        | 1.24459255847898e-235 | 100                |
| 100                   |        |                       | 100                |
| IRF4-regulon          | Memory | LGALS1                | 0.0586231579044048 |
| 0.000217925379697274  |        | 34792549.5            | 0.534851096928578  |
| 4.85290682964664e-06  |        | 6.96073504858407e-06  | 100                |
| 99.9954435685971      |        |                       |                    |
| IRF5-regulon          | Memory | LGALS1                | 0.0484189457202728 |
| 0.00142058633675839   |        | 33634101.5            | 0.517042767489118  |
| 0.024853027069415     |        | 0.0284607245472333    | 87.0445344129555   |
| 80.256982731125       |        |                       |                    |
| IRF7-regulon          | Memory | LGALS1                | 0.119072123292072  |
| 0.0116168391209796    |        | 45905780.5            | 0.705690080452067  |

|                       |                       |                    |                     |
|-----------------------|-----------------------|--------------------|---------------------|
| 2.66488580006055e-160 | 3.4401253055327e-159  | 100                | 100                 |
| IRF8-regulon          | Memory LGALS1         | 0.085888836894163  |                     |
| 0.00425487846215314   | 38022878.5            | 0.584509573640386  |                     |
| 1.49642566382585e-28  | 3.72793761865388e-28  | 100                | 100                 |
| IRF9-regulon          | Memory LGALS1         | 0.0358851777323952 |                     |
| 0.00203543479001313   | 36231138              | 0.556965907378264  |                     |
| 7.92174975286216e-14  | 1.4998512865419e-13   | 100                | 100                 |
| JUN-regulon           | Memory LGALS1         | 0.0938341851755963 |                     |
| 0.00561736751776623   | 38461997.5            | 0.591259963658001  |                     |
| 5.12746490397368e-33  | 1.37377361578163e-32  | 100                | 100                 |
| JUNB-regulon          | Memory LGALS1         | 0.168600268996879  |                     |
| 0.00911549426318667   | 40307865.5            | 0.619635709005015  |                     |
| 1.73338839553521e-55  | 6.65246357205407e-55  | 100                | 100                 |
| JUND-regulon          | Memory LGALS1         |                    |                     |
| 0.0383195522283965    | -0.000142799411797671 | 32512407.5         |                     |
| 0.499799441692651     | 0.979014785427983     | 0.979014785427983  |                     |
| 100                   | 100                   |                    |                     |
| KLF11-regulon         | Memory LGALS1         | 0.0412383077090531 |                     |
| 0.0199535102128751    | 41413099.5            | 0.636626002207379  |                     |
| 4.79609658237884e-90  | 2.72418285879118e-89  | 61.4035087719298   |                     |
| 40.1649428167859      |                       |                    |                     |
| KLF12-regulon         | Memory LGALS1         | 0.04970827626533   | 0.00274841588436076 |
| 35173114.5            | 0.540701361155482     |                    |                     |
| 9.37845184573991e-08  | 1.41674485329262e-07  | 99.6626180836707   |                     |
| 98.56700232378        |                       |                    |                     |
| KLF13-regulon         | Memory LGALS1         | 0.0739910996742154 |                     |
| 0.00795894349395805   | 48433705              | 0.744550790897492  |                     |
| 9.79909304375735e-226 | 1.98781601744792e-224 | 100                | 100                 |
| KLF2-regulon          | Memory LGALS1         | 0.142116608477133  |                     |
| 0.0343914822418943    | 55446392.5            | 0.852353859534136  | 0                   |
| 0                     | 100                   | 100                |                     |
| KLF3-regulon          | Memory LGALS1         | 0.0837510937403041 |                     |
| 0.0121176440356604    | 40360027.5            | 0.620437573292597  |                     |
| 3.28776526881683e-56  | 1.3731254946235e-55   | 100                |                     |
| 99.8587506265093      |                       |                    |                     |
| KLF4-regulon          | Memory LGALS1         |                    |                     |
| 0.0147068061407709    | -0.00123326443466407  | 32330918           |                     |
| 0.497009480636304     | 0.674738364944126     | 0.684377484443327  |                     |
| 50.7422402159244      | 49.7812912926596      |                    |                     |
| KLF6-regulon          | Memory LGALS1         | 0.100637751263646  |                     |
| 0.0323132387882003    | 54616510              | 0.83959642807753   | 0 0 100             |
| 100                   |                       |                    |                     |
| KLF7-regulon          | Memory LGALS1         | 0.0596474634038472 |                     |
| 0.0141095495159673    | 43041324              | 0.661656006400403  |                     |
| 8.98670630422181e-100 | 6.0767252152357e-99   | 99.7975708502024   |                     |
| 97.4802934341824      |                       |                    |                     |
| KLF8-regulon          | Memory LGALS1         | 0.0378676803778019 |                     |
| 0.0131918068638183    | 42569079.5            | 0.654396392130299  |                     |
| 3.43558738994175e-92  | 2.03272253904887e-91  | 91.9028340080972   |                     |
| 77.1540529457329      |                       |                    |                     |

MAFB-regulon Memory LGALS1  
0.0553985161580099 -0.000397367413533446 32110658  
0.4936235171383 0.402966521563525 0.430234932797147 100  
99.9977217842985  
MAFF-regulon Memory LGALS1 0.0141150851009254  
0.00178649192109364 33760158 0.518980580563149  
0.00178628732393613 0.0022647571428476 31.9838056680162  
28.429853738552  
MAFG-regulon Memory LGALS1 0.0258782800807734  
0.000486827411073459 32910694 0.505922131017756  
0.420325857316691 0.445419938350523 59.7165991902834  
58.563812821798  
MAX-regulon Memory LGALS1 0.206048087409006  
0.00866074102781583 44800044.5 0.68869207021676  
3.19885750551539e-135 3.2445554698799e-134 100 100  
MAZ-regulon Memory LGALS1  
0.133386248683197 -0.00301607061802767 30398486  
0.467303023656488 1.79871866580634e-05  
2.45594279369712e-05 100 100  
MEF2A-regulon Memory LGALS1 0.0437811326187523  
0.0031290122655554 36536290.5 0.561656887248984  
6.12128480593962e-16 1.20725339228254e-15 99.9325236167341 100  
MLX-regulon Memory LGALS1 0.0552501831990037  
0.0024032154870985 35538552 0.546319076745247  
1.23847481962666e-09 2.02141867111477e-09 100  
99.9886089214927  
MXD4-regulon Memory LGALS1  
0.0906179378719424 -0.00160356479488211 37837516  
0.581660074598805 8.3415236204032e-27  
2.04223509327113e-26 94.6018893387315 88.4016038638538  
MXI1-regulon Memory LGALS1 0.0666928144338967  
0.00151266723317968 34326728 0.527690220711446  
0.000281416506686393 0.000373468635041755 100 100  
MYBL1-regulon Memory LGALS1  
0.0233498309818603 -0.00676121208457801 31653920  
0.486602277711481 0.0776909094684345 0.0868670011379347  
83.2658569500675 79.951701827129  
MYC-regulon Memory LGALS1  
0.287699600696218 -0.0280999138715381 24730550  
0.380172249094509 1.16525061552086e-55  
4.59626631677671e-55 100 100  
NFATC1-regulon Memory LGALS1  
0.0347537466200124 -0.0162963411592365 24274666.5  
0.373164145533526 3.76832752419276e-62  
1.67219533886054e-61 91.025641025641 94.9560304369618  
NFE2L1-regulon Memory LGALS1  
0.17670726830041 -0.00616109840716575 33583641 0.516267059638891  
0.0328774395257968 0.0373487713013052 100  
99.9339317446576  
NFE2L2-regulon Memory LGALS1

|                      |                       |                      |     |
|----------------------|-----------------------|----------------------|-----|
| 0.101414770995262    | -0.00978535145550029  | 25527359.5           |     |
| 0.392421263358845    | 3.29758492318544e-45  | 1.0405712424274e-44  |     |
| 100                  | 100                   |                      |     |
| NFKB1-regulon        | Memory LGALS1         |                      |     |
| 0.0500181244147822   | -0.0068752199241682   | 29382987.5           |     |
| 0.45169219621039     | 2.35773790638014e-10  | 3.93880920830565e-10 | 100 |
| 99.9293753132547     |                       |                      |     |
| NFKB2-regulon        | Memory LGALS1         | 0.0767109144012846   |     |
| 0.00344689867878525  | 37026923.5            | 0.569199180125203    |     |
| 1.12512385009819e-19 | 2.34952333402857e-19  | 100                  | 100 |
| NFYA-regulon         | Memory LGALS1         | 0.0261100246837371   |     |
| 0.00533589113210867  | 41486264.5            | 0.63775073669994     |     |
| 5.76548993499083e-73 | 3.03222063247666e-72  | 99.8650472334683     |     |
| 98.9884722285506     |                       |                      |     |
| NFYB-regulon         | Memory LGALS1         |                      |     |
| 0.0984982901437867   | -0.0104685127733432   | 23905367             |     |
| 0.367487061056857    | 1.1631016385524e-67   |                      |     |
| 5.50534775581469e-67 | 100                   | 100                  |     |
| NFYC-regulon         | Memory LGALS1         |                      |     |
| 0.0806673792715307   | -0.00296417059015422  | 29859707             |     |
| 0.459020602756229    | 7.66540796218371e-08  |                      |     |
| 1.17041712970977e-07 | 100                   | 100                  |     |
| NR1H3-regulon        | Memory LGALS1         | 0.010396006067927    |     |
| 0.00192447190411015  | 33788312              | 0.519413380056125    |     |
| 0.000454341469450256 | 0.000586513533290331  | 25.5735492577598     |     |
| 21.9870597348157     |                       |                      |     |
| NR2C2-regulon        | Memory LGALS1         | 0.0310766801095698   |     |
| 0.00960418863292775  | 40503016.5            | 0.622635682502695    |     |
| 5.25418727972759e-59 | 2.26089270824642e-58  | 87.1794871794872     |     |
| 75.6003098373354     |                       |                      |     |
| NR3C1-regulon        | Memory LGALS1         | 0.232007464325929    |     |
| 0.00675034830130378  | 39484295              | 0.606975309245491    |     |
| 1.00982655152018e-44 | 3.05096532586948e-44  | 100                  | 100 |
| NRF1-regulon         | Memory LGALS1         |                      |     |
| 0.0265072681376985   | -0.000229389793155493 | 33131988             |     |
| 0.509323989758913    | 0.221356915560918     | 0.243664201625197    |     |
| 99.9325236167341     | 99.9681049801795      |                      |     |
| PAX5-regulon         | Memory LGALS1         | 0.109864075173176    |     |
| 0.00992040075004096  | 41025122.5            | 0.630661796450251    |     |
| 7.79009984702058e-66 | 3.56836831702233e-65  | 100                  | 100 |
| POU2F1-regulon       | Memory LGALS1         |                      |     |
| 0.00400609221161733  | -0.000903393900579079 | 32356728             |     |
| 0.497406246812112    | 0.6142563077705971    | 0.627513638088114    |     |
| 18.0161943319838     | 18.3578621223857      |                      |     |
| POU6F1-regulon       | Memory LGALS1         | 0.0377014959889615   |     |
| 0.00692555787215131  | 36945643              | 0.567949689495495    |     |
| 8.74287686254783e-20 | 1.85296793206238e-19  | 74.1565452091768     |     |
| 65.0567275709664     |                       |                      |     |
| REL-regulon          | Memory LGALS1         |                      |     |
| 0.255581191371714    | -0.00840531180715892  | 25437687             |     |



|                       |                      |                       |                      |     |
|-----------------------|----------------------|-----------------------|----------------------|-----|
| 0.391042766074841     |                      | 2.49852476005039e-46  |                      |     |
| 8.06342081652626e-46  |                      | 100                   | 100                  |     |
| RELA-regulon          | Memory               | LGALS1                | 0.0963189152283828   |     |
| 0.00439809734583965   |                      | 39917294.5            | 0.613631626786824    |     |
| 3.11099901751124e-50  |                      | 1.10440465121649e-49  | 100                  | 100 |
| RELB-regulon          | Memory               | LGALS1                |                      |     |
| 0.0973337347332984    |                      | -0.0081149829723709   | 22343722             |     |
| 0.34348055525989      | 1.18602003105067e-93 |                       | 7.32238453953022e-93 | 100 |
|                       | 100                  |                       |                      |     |
| REST-regulon          | Memory               | LGALS1                | 0.226966790522296    |     |
| 0.00863018402417204   |                      | 44463330              | 0.683515901115477    |     |
| 5.17564413489789e-128 |                      | 4.89960978103667e-127 | 100                  | 100 |
| RFX5-regulon          | Memory               | LGALS1                | 0.0662115291219795   |     |
| 0.000892194082880604  |                      | 36788641              | 0.565536164383747    |     |
| 8.27710548446234e-18  |                      | 1.70340431709225e-17  | 100                  | 100 |
| RXRA-regulon          | Memory               | LGALS1                |                      |     |
| 0.0135583315070495    |                      | -0.00100461854138841  | 32013191.5           |     |
| 0.492125206000199     |                      | 0.290392391211618     | 0.317197842708075    |     |
|                       | 64.8448043184885     | 64.2434045655443      |                      |     |
| SETDB1-regulon        | Memory               | LGALS1                |                      |     |
| 0.0579354155162841    |                      | -0.00184228110784895  | 31116288.5           |     |
| 0.478337496841704     |                      | 0.00449136985020383   | 0.00554586538025169  |     |
|                       | 94.4669365721997     | 95.0722194377364      |                      |     |
| SOX5-regulon          | Memory               | LGALS1                | 0.00995515513752415  |     |
| 0.00222450491924136   |                      | 34129934              | 0.524664990072083    |     |
| 9.63116870183073e-06  |                      | 1.35408510461382e-05  | 26.9905533063428     |     |
| 22.3424613842439      |                      |                       |                      |     |
| SP1-regulon           | Memory               | LGALS1                | 0.0138904970959481   |     |
| 0.000926896201835788  |                      | 34436861              | 0.529383248578175    |     |
| 6.73975550952278e-05  |                      | 9.11471697478318e-05  | 66.5991902834008     |     |
| 59.5935663188591      |                      |                       |                      |     |
| SP2-regulon           | Memory               | LGALS1                |                      |     |
| 0.0275762901473711    |                      | -0.000686281147246223 | 31208726.5           |     |
| 0.479758506983484     |                      | 0.0079341066228993    | 0.00962942855086924  |     |
|                       | 100                  | 100                   |                      |     |
| SP3-regulon           | Memory               | LGALS1                | 0.0304744821673545   |     |
| 0.00227901550118312   |                      | 37517810              | 0.576745369949333    |     |
| 7.81884142822662e-24  |                      | 1.85045913801363e-23  | 100                  | 100 |
| SP4-regulon           | Memory               | LGALS1                | 0.0100469680964162   |     |
| 0.00145661754810398   |                      | 33928521.5            | 0.521568761192388    |     |
| 0.000415895024990052  |                      | 0.000546824940264698  | 32.8609986504723     |     |
| 28.8854968788445      |                      |                       |                      |     |
| SPI1-regulon          | Memory               | LGALS1                | 0.443358223181473    |     |
| 0.0256530865119349    |                      | 46708182.5            | 0.718025065845353    |     |
| 7.52640886390175e-180 |                      | 1.18750006519339e-178 | 100                  | 100 |
| SPIB-regulon          | Memory               | LGALS1                | 0.568241557430711    |     |
| 0.00391831111252638   |                      | 34681098              | 0.533137800320942    |     |
| 1.3843239876523e-05   |                      | 1.90848549754006e-05  | 100                  | 100 |
| SREBF1-regulon        | Memory               | LGALS1                | 0.0412665940319033   |     |
| 0.000348082461866177  |                      | 33044302              | 0.507976030096306    |     |

|                       |                       |                                      |
|-----------------------|-----------------------|--------------------------------------|
| 0.295493532580949     | 0.320305966614464     | 97.3009446693657                     |
| 96.8811227046977      |                       |                                      |
| SREBF2-regulon        | Memory LGALS1         | 0.106412048105643                    |
| 0.00768025457239831   | 43889689              | 0.674697561485229                    |
| 3.42980385404682e-116 | 3.04395092046655e-115 | 100 100                              |
| SRF-regulon           | Memory LGALS1         | 0.0225573687935001                   |
| 0.00184856766230648   | 35910556              | 0.552037736352581                    |
| 8.77614840817198e-12  | 1.51977204141515e-11  | 99.1228070175439                     |
| 97.8949286918485      |                       |                                      |
| STAT1-regulon         | Memory LGALS1         | 0.0862647182082246                   |
| 0.00671554044914924   | 42937333.5            | 0.660057404579195                    |
| 7.59435764675112e-98  | 4.901812662903e-97    | 100 100                              |
| STAT2-regulon         | Memory LGALS1         | 0.0683810846424522                   |
| 0.0022192103793774    | 34688094.5            | 0.533245354546012                    |
| 1.29801195935325e-05  | 1.80703625713884e-05  | 100                                  |
| 99.9612703330751      |                       |                                      |
| STAT5A-regulon        | Memory LGALS1         |                                      |
| 0.0648588975085012    | -0.00697679605372739  | 26595630.5                           |
| 0.408843340049919     | 6.03644183785867e-33  |                                      |
| 1.58736063143691e-32  | 100 100               |                                      |
| TBP-regulon           | Memory LGALS1         |                                      |
| 0.0200010287927934    | -0.000930631282146287 | 32194905                             |
| 0.494918610513477     | 0.475945706657387     | 0.491054627709774                    |
| 49.4601889338731      | 49.8997585091356      |                                      |
| TCF12-regulon         | Memory LGALS1         | 0.0107098853386129                   |
| 0.0017224272503249    | 33855159.5            | 0.520440998302437                    |
| 0.00044006422596482   | 0.000573294679697289  | 28.8798920377868                     |
| 25.0968241673122      |                       |                                      |
| TFDP1-regulon         | Memory LGALS1         |                                      |
| 0.512633428211799     | -0.0160542116536025   | 25434529                             |
| 0.390994219481149     | 2.28015862883212e-46  |                                      |
| 7.52982616963166e-46  | 100 100               |                                      |
| TFDP2-regulon         | Memory LGALS1         |                                      |
| 0.0252506382591421    | -0.00193573749363908  | 30028105                             |
| 0.461609313739326     | 4.77104905097461e-07  | 7.1314627919831e-07                  |
| 100                   | 99.9954435685971      |                                      |
| TFEC-regulon          | Memory LGALS1         | 0.108767593888254                    |
| 0.0178076542735024    | 46460368.5            | 0.714215526399724                    |
| 1.08467049356038e-173 | 1.54023210085574e-172 | 100 100                              |
| THAP1-regulon         | Memory LGALS1         | 0.037705907045275                    |
| 0.000559052920442005  | 33762456              | 0.51901590674184 0.0126272007012109  |
| 0.0151954449116266    | 100 100               |                                      |
| THAP11-regulon        | Memory LGALS1         | 0.180549702125715                    |
| 0.00214194918104899   | 35846126.5            | 0.551047288994029                    |
| 2.15184278429564e-11  | 3.63763899249976e-11  | 100 100                              |
| TP53-regulon          | Memory LGALS1         |                                      |
| 0.0895365826191069    | -0.00911790429353938  | 24725969.5                           |
| 0.380101835012049     | 1.00718217491098e-55  | 4.0862819667817e-55                  |
| 100                   | 100                   |                                      |
| USF2-regulon          | Memory LGALS1         | 0.13430548824662 0.00932380260692688 |

44845391 0.689389162715454 3.3027011960933e-136  
 3.60756592188652e-135 100 100  
 XBP1-regulon Memory LGALS1 0.199462295140579  
 0.0043133028618759 43632682.5 0.67074670963855  
 4.39972176966885e-111 3.47089161829432e-110 100 100  
 YBX1-regulon Memory LGALS1  
 0.0933154015064696 -0.0019314422308775 29838988  
 0.458702098362716 6.07406684360398e-08  
 9.47821419551391e-08 100 100  
 YY1-regulon Memory LGALS1  
 0.634630709119997 -0.00500405780675262 29859284  
 0.459014100156757 7.62920953966469e-08  
 1.17041712970977e-07 100 100  
 YY2-regulon Memory LGALS1  
 0.0494977438940639 -0.00155510342770226 32160516.5  
 0.494389970698026 0.461657803646841 0.485595615687789  
 92.2402159244265 90.4725019364834  
 ZBTB33-regulon Memory LGALS1 0.370601291279154  
 0.00493650596555556 36503235.5 0.561148746763074  
 1.05545210993397e-15 2.05307122754279e-15 100 100  
 ZNF143-regulon Memory LGALS1 0.0245692039333794  
 0.00128028268910775 35522473.5 0.546071908788729  
 1.51497168249817e-09 2.4171458305027e-09 100  
 99.9931653528956  
 ZNF274-regulon Memory LGALS1 0.0679052881997217  
 0.00265031796409605 36374725 0.559173209388561  
 8.41812711967344e-15 1.61537033918058e-14 100 100  
 ZNF76-regulon Memory LGALS1  
 0.0142695057156398 -0.000297311250054947 32166548.5  
 0.494482698073945 0.469283647252034 0.489987337571977  
 99.5951417004049 99.4555064473504  
 ATF1-regulon Memory LGALS3 0.115685850153189  
 0.00969034308489279 33767642.5 0.705213051550037  
 5.52819796870115e-118 3.89845921261373e-117 100 100  
 ATF3-regulon Memory LGALS3 0.0632927128723501  
 0.0125703985174344 34454988.5 0.719567780937222  
 8.84934179433916e-135 7.39180314585977e-134 100 100  
 ATF4-regulon Memory LGALS3 0.124477922685581  
 0.0161100731101773 33892061.5 0.7078114533384  
 6.11202623961066e-121 4.56793540013007e-120 100 100  
 ATF5-regulon Memory LGALS3 0.136830094381634  
 0.0188456150663379 31802714.5 0.664176936252497  
 3.30661105769303e-76 1.42284475815882e-75 100  
 99.9977424088498  
 ATF6-regulon Memory LGALS3 0.139745021411501  
 0.00341236933399028 33000433 0.689190430110794  
 1.42539162536442e-100 8.43356711673951e-100 100 100  
 ATF6B-regulon Memory LGALS3 0.0576706622730563  
 0.000383281845196835 27177260.7695312 0.567577644783826  
 2.84935358067933e-14 4.70474660995889e-14 100

99.9187267185913  
 BACH1-regulon Memory LGALS3 0.0569507521208443  
 0.0140014757095795 32453276.5 0.677763458120066  
 5.13665236613444e-89 2.60501655711104e-88 99.9074930619797  
 99.5552545434022  
 BATF-regulon Memory LGALS3 0.0199176169976122  
 0.000639498574631414 25436332.5 0.531219603576601  
 0.000192053670106193 0.000241341780133446 58.6493987049029  
 51.5475787334914  
 BATF3-regulon Memory LGALS3 0.106564298434571  
 0.0239717668908233 35547679 0.742387840167141  
 8.26991086690125e-164 9.78606119249982e-163 100 100  
 BCL11A-regulon Memory LGALS3  
 0.187336875052239 -0.0175823232697294 12967347.5  
 0.270813773895668 1.14793757636154e-146  
 1.16433668459528e-145 100 100  
 BHLHE40-regulon Memory LGALS3 0.0653902294802307  
 0.00997673043003442 31719576 0.662440648168829  
 1.21149372996889e-74 4.91520313301663e-74 100 100  
 BRF2-regulon Memory LGALS3 0.055094868464969  
 0.013811568448042 34691671 0.724510725594181  
 7.97228926664702e-141 7.07540672414923e-140 100  
 99.7223162885201  
 CEBPB-regulon Memory LGALS3 0.159825403868229  
 0.0171417535588342 35898157.5 0.749707332858634  
 1.00144032148954e-173 1.42204525651515e-172 100 100  
 CEBPG-regulon Memory LGALS3 0.0795752580877738  
 0.0117955312505964 30806682 0.643375510190017  
 1.47541519274656e-58 4.36476994520859e-58 100 100  
 CLOCK-regulon Memory LGALS3  
 0.0152742752755288 -0.000328272396006447 24075633  
 0.502802368152552 0.737184609301198 0.7477158180055  
 52.7289546716004 51.0531662715882  
 CREB1-regulon Memory LGALS3  
 0.0369985130112086 -0.00611844408414072 18447191  
 0.385256384351865 3.85474701913135e-38  
 8.82861414059117e-38 100 99.9932272265493  
 CREB3-regulon Memory LGALS3 0.250898835266822  
 0.0113696836119256 35661695.5 0.744768993186398  
 5.2925952248048e-167 6.83225929020256e-166 100 100  
 CREB3L2-regulon Memory LGALS3  
 0.126254121606252 -0.000535846813084356 28369073.5  
 0.592467800871271 2.34586516410067e-25  
 4.16391066627869e-25 100 100  
 CREB3L4-regulon Memory LGALS3  
 0.00766338060711226 -0.00352186600710122 22184357.5  
 0.463304432616282 5.14731454463748e-07 7.4583537279441e-07  
 24.9768732654949 31.5024269104865  
 CREB5-regulon Memory LGALS3 0.0485965387281629  
 0.00965217127767055 30329120.5 0.633401979976357

|                       |                       |                      |     |
|-----------------------|-----------------------|----------------------|-----|
| 6.16998160343838e-51  | 1.68487959170817e-50  | 100                  |     |
| 99.6139519133085      |                       |                      |     |
| CREM-regulon          | Memory LGALS3         | 0.157953031582674    |     |
| 0.008147574574001     | 31364223              | 0.655019355032731    |     |
| 3.81612871543723e-68  | 1.29021494664783e-67  | 100                  | 100 |
| CTCF-regulon          | Memory LGALS3         |                      |     |
| 0.369318645358519     | -0.00155874046870941  | 24296235.5           |     |
| 0.507409493515377     | 0.404405648646571     | 0.416127551505892    |     |
| 100                   | 100                   |                      |     |
| CUX1-regulon          | Memory LGALS3         |                      |     |
| 0.0682475361648872    | -0.0086567608023715   | 16772388.5           |     |
| 0.350279332525738     | 1.08786410652928e-63  |                      |     |
| 3.43281562504794e-63  | 100                   | 100                  |     |
| DDIT3-regulon         | Memory LGALS3         | 0.0937402989629915   |     |
| 0.00904771701427669   | 29393289.5            | 0.61385781916486     |     |
| 1.39995933015165e-37  | 3.05837269048514e-37  | 100                  | 100 |
| E2F1-regulon          | Memory LGALS3         | 0.448813307173294    |     |
| 0.0113897176584378    | 30646930.5            | 0.640039214420933    |     |
| 6.0120839262722e-56   | 1.74227738271562e-55  | 100                  | 100 |
| E2F2-regulon          | Memory LGALS3         |                      |     |
| 0.0517782920664081    | -0.00219499144305852  | 23471322             |     |
| 0.490181765325593     | 0.269232788912123     | 0.283193007596455    |     |
| 100                   | 100                   |                      |     |
| E2F3-regulon          | Memory LGALS3         |                      |     |
| 0.0201169795065286    | -0.00102268647883414  | 22330532.5           |     |
| 0.46635719289738      | 0.000153228993126266  | 0.000194272473427944 | 100 |
| 100                   |                       |                      |     |
| E2F4-regulon          | Memory LGALS3         | 0.434801157292788    |     |
| 0.037025705097612     | 36165305.5            | 0.755286527683842    |     |
| 1.75378804397798e-181 | 3.11297377806091e-180 | 100                  | 100 |
| E2F6-regulon          | Memory LGALS3         | 0.0920538978141368   |     |
| 0.0201322934316366    | 36544193.5            | 0.763199332454731    |     |
| 8.90741218058904e-193 | 2.10808754940607e-191 | 100                  | 100 |
| E2F7-regulon          | Memory LGALS3         |                      |     |
| 0.0294461980118892    | -0.00115535340889829  | 22515595             |     |
| 0.470222090790459     | 0.000805594339818416  |                      |     |
| 0.000977729882514659  | 100                   | 100                  |     |
| E2F8-regulon          | Memory LGALS3         | 0.0748344210435566   |     |
| 3.87329781140755e-05  | 27884276              | 0.582343151975251    |     |
| 1.93332328780846e-20  | 3.30761333576869e-20  | 100                  | 100 |
| EGR1-regulon          | Memory LGALS3         |                      |     |
| 0.0412418856880405    | -0.00637294621060153  | 14734365.5           |     |
| 0.307716680455515     | 7.99298572569249e-104 |                      |     |
| 4.93479988281884e-103 | 100                   | 100                  |     |
| EGR2-regulon          | Memory LGALS3         |                      |     |
| 0.043163518648033     | -0.00295478234636292  | 22039048             |     |
| 0.460269747683385     | 7.7931636479606e-06   |                      |     |
| 1.04398984717963e-05  | 100                   | 99.9954848176995     |     |
| EGR3-regulon          | Memory LGALS3         |                      |     |
| 0.0386043244415571    | -0.00293678188120398  | 22003256             |     |

|                       |                   |                       |                    |                      |
|-----------------------|-------------------|-----------------------|--------------------|----------------------|
| 0.459522257373954     |                   | 5.24098049693335e-06  |                    |                      |
| 7.08780219585272e-06  |                   | 100                   | 99.9954848176995   |                      |
| ELF1-regulon          | Memory            | LGALS3                |                    |                      |
| 0.701563633702398     |                   | -0.00561476795273452  | 23110918           |                      |
| 0.482654985668682     |                   | 0.0509608753474342    | 0.0569798763727217 |                      |
|                       | 100               | 100                   |                    |                      |
| ELF2-regulon          | Memory            | LGALS3                |                    |                      |
| 0.0302029156616123    |                   | -0.00251301432071104  | 22510914.5         |                      |
| 0.470124341897039     |                   | 0.000774179045980584  |                    |                      |
| 0.000947701935596921  |                   | 99.5374653098982      | 99.53493622305     |                      |
| ELF4-regulon          | Memory            | LGALS3                |                    |                      |
| 0.0181033070910471    |                   | -0.000352184963345065 | 23538437.5         |                      |
| 0.49158342451934      | 0.343584478759388 |                       | 0.356124058276154  |                      |
| 98.9824236817761      | 98.3203521842194  |                       |                    |                      |
| ELK1-regulon          | Memory            | LGALS3                | 0.0729544126750265 |                      |
| 0.00706781918025029   |                   | 31160493.5            | 0.650764610201618  |                      |
| 1.48261472154063e-64  |                   | 4.78480205588113e-64  | 100                | 100                  |
| ELK3-regulon          | Memory            | LGALS3                |                    |                      |
| 0.064266033995984     |                   | -0.000655026914329546 | 23420756.5         |                      |
| 0.489125741039676     |                   | 0.221078994408154     | 0.236039227112465  |                      |
|                       | 100               | 100                   |                    |                      |
| ELK4-regulon          | Memory            | LGALS3                |                    |                      |
| 0.0443479061795435    |                   | -0.000664968833466929 | 23861158.5         |                      |
| 0.498323221684904     |                   | 0.850337619319782     | 0.856368382577369  |                      |
|                       | 97.6873265494912  | 96.7061745117959      |                    |                      |
| ESRRA-regulon         | Memory            | LGALS3                | 0.11270229917121   | 0.0214782537049131   |
|                       | 37417629          | 0.781440407895137     |                    | 4.0112186284557e-220 |
| 1.42398261310177e-218 |                   | 100                   | 100                |                      |
| ETS1-regulon          | Memory            | LGALS3                |                    |                      |
| 0.224496175941787     |                   | -0.0188929190339744   | 16071981.5         |                      |
| 0.335651833499207     |                   | 2.3134608224519e-76   |                    |                      |
| 1.02659823996303e-75  |                   | 100                   | 100                |                      |
| ETV2-regulon          | Memory            | LGALS3                |                    |                      |
| 0.0268781180358574    |                   | -0.00176597894081145  | 21780820           |                      |
| 0.454876840675569     |                   | 3.82141365388745e-07  |                    |                      |
| 5.59423442115482e-07  |                   | 100                   | 100                |                      |
| ETV3-regulon          | Memory            | LGALS3                |                    |                      |
| 0.0100891408557057    |                   | -0.00137261472555079  | 22314394.5         |                      |
| 0.466020162314747     |                   | 0.000127595212910123  |                    |                      |
| 0.000163294017251578  |                   | 84.6438482886217      | 84.3413477819167   |                      |
| ETV5-regulon          | Memory            | LGALS3                |                    |                      |
| 0.0308289471744005    |                   | -0.00269899358124404  | 19510128.5         |                      |
| 0.407455073466214     |                   | 2.14146546582358e-25  |                    |                      |
| 3.84921640692339e-25  |                   | 100                   | 100                |                      |
| ETV6-regulon          | Memory            | LGALS3                | 0.479313544905519  |                      |
| 0.0202203628873032    |                   | 34909021              | 0.729049924821797  |                      |
| 1.70574346941966e-146 |                   | 1.61477048438395e-145 | 100                | 100                  |
| ETV7-regulon          | Memory            | LGALS3                |                    |                      |
| 0.0618751627206914    |                   | -0.00225462916897309  | 22866728           |                      |
| 0.477555252246131     |                   | 0.0115476258150079    | 0.0135517592209184 |                      |

|                       |                      |                       |                    |                      |                     |
|-----------------------|----------------------|-----------------------|--------------------|----------------------|---------------------|
|                       | 100                  | 100                   |                    |                      |                     |
| FLI1-regulon          | Memory               | LGALS3                |                    |                      |                     |
| 0.130278928619714     |                      | -0.0139857723444195   |                    |                      | 15943016            |
| 0.332958481311541     |                      | 7.99887861017785e-79  |                    |                      |                     |
| 3.78613587548418e-78  | 100                  | 100                   |                    |                      |                     |
| FOS-regulon           | Memory               | LGALS3                |                    |                      |                     |
| 0.0792398403993435    |                      | -0.00720943581822664  |                    |                      | 17631216            |
| 0.368215330338736     |                      | 9.43720763554007e-50  |                    |                      |                     |
| 2.52845940423904e-49  | 100                  | 100                   |                    |                      |                     |
| FOSB-regulon          | Memory               | LGALS3                | 0.0418188991894955 |                      |                     |
| 0.000353847032078872  |                      | 24881920.5            |                    | 0.519641105659965    |                     |
| 0.0270922943488691    |                      | 0.0307768463803152    |                    |                      | 99.8149861239593    |
| 99.311434699176       |                      |                       |                    |                      |                     |
| FOSL1-regulon         | Memory               | LGALS3                | 0.0762135424658417 |                      |                     |
| 0.015796150144286     |                      | 35279958              | 0.736796678646936  |                      |                     |
| 1.97020929821516e-156 |                      | 2.15207477189656e-155 |                    | 100                  | 100                 |
| FOX01-regulon         | Memory               | LGALS3                |                    |                      |                     |
| 0.0110794483059016    |                      | -0.00575463030247177  |                    |                      | 20865041            |
| 0.435751451536086     |                      | 1.91802576791109e-14  |                    |                      |                     |
| 3.20423128286323e-14  |                      | 43.8482886216466      | 52.5499492041991   |                      |                     |
| FOX03-regulon         | Memory               | LGALS3                |                    |                      |                     |
| 0.00883264581272571   |                      | -0.0111775515421807   |                    |                      | 18892192            |
| 0.39454991182133      | 6.02507151215078e-38 |                       |                    | 1.33681274175845e-37 |                     |
| 29.5097132284921      | 47.181397448922      |                       |                    |                      |                     |
| GABPA-regulon         | Memory               | LGALS3                |                    |                      |                     |
| 0.0211613788350332    |                      | -0.00443213567727493  |                    |                      | 16913960.5          |
| 0.353235962445462     |                      | 2.85442672934264e-61  |                    |                      |                     |
| 8.81149120797076e-61  | 100                  | 100                   |                    |                      |                     |
| GTF2B-regulon         | Memory               | LGALS3                | 0.0868812422649747 |                      |                     |
| 0.00801520935086528   |                      | 29741156.5            | 0.621122772547483  |                      |                     |
| 2.66397771673326e-42  |                      | 6.52215234096764e-42  |                    | 100                  | 100                 |
| HINFP-regulon         | Memory               | LGALS3                |                    |                      |                     |
| 0.0144172046190336    |                      | -0.00185759528226915  |                    |                      | 22755825            |
| 0.475239122446544     |                      | 0.00426002818803756   |                    |                      | 0.00508339498068348 |
| 60.4995374653099      | 63.3005982616548     |                       |                    |                      |                     |
| HIVEP3-regulon        | Memory               | LGALS3                | 0.0932419395615455 |                      |                     |
| 0.0159335599691676    |                      | 31514465              | 0.658157051698733  |                      |                     |
| 7.43017124519291e-71  |                      | 2.70534440209588e-70  |                    | 100                  |                     |
| 99.6861948301163      |                      |                       |                    |                      |                     |
| HOXB2-regulon         | Memory               | LGALS3                | 0.0404355748703764 |                      |                     |
| 0.00341418709328205   |                      | 26678705.5            | 0.557165674715365  |                      |                     |
| 1.14332443734843e-10  |                      | 1.78408868245579e-10  |                    |                      | 91.0268270120259    |
| 83.5511908793318      |                      |                       |                    |                      |                     |
| IKZF1-regulon         | Memory               | LGALS3                | 0.146285735266372  |                      |                     |
| 0.00248070033993883   |                      | 26526749.5            | 0.553992182385798  |                      |                     |
| 1.23475875271874e-09  |                      | 1.9058232922398e-09   |                    | 100                  | 100                 |
| IRF1-regulon          | Memory               | LGALS3                |                    |                      |                     |
| 0.127950297190288     |                      | -0.00767498916610815  |                    |                      | 18748703            |
| 0.391553246728294     |                      | 2.98255125670512e-34  |                    |                      |                     |
| 6.13800403553808e-34  | 100                  | 100                   |                    |                      |                     |

|                      |                      |        |                       |                     |     |
|----------------------|----------------------|--------|-----------------------|---------------------|-----|
| IRF2-regulon         | Memory               | LGALS3 | 0.0892341821655639    |                     |     |
| 0.00431659571159368  |                      |        | 27288527.5            | 0.56990137083399    |     |
| 3.66445243929826e-15 |                      |        | 6.19466959976611e-15  | 100                 | 100 |
| IRF3-regulon         | Memory               | LGALS3 | 0.149917734643051     |                     |     |
| 0.00458032364004654  |                      |        | 28681400.5            | 0.598990526784147   |     |
| 8.07835537242808e-29 |                      |        | 1.50937692484841e-28  | 100                 | 100 |
| IRF4-regulon         | Memory               | LGALS3 | 0.0625085625041471    |                     |     |
| 0.00419617870491797  |                      |        | 28761035.5            | 0.600653646777205   |     |
| 9.70992594557222e-30 |                      |        | 1.88878011544007e-29  | 100                 |     |
| 99.9954848176995     |                      |        |                       |                     |     |
| IRF5-regulon         | Memory               | LGALS3 | 0.0680285598064488    |                     |     |
| 0.0214959039494298   |                      |        | 31397536              | 0.655715073200983   |     |
| 3.04740404426948e-69 |                      |        | 1.05544237630797e-68  | 93.154486586494     |     |
| 80.1693193362682     |                      |        |                       |                     |     |
| IRF7-regulon         | Memory               | LGALS3 |                       |                     |     |
| 0.100662006882684    |                      |        | -0.00734773463858426  | 18297856            |     |
| 0.38213762973187     | 3.79981327045803e-40 |        | 9.14531329500067e-40  |                     | 100 |
| 100                  |                      |        |                       |                     |     |
| IRF8-regulon         | Memory               | LGALS3 |                       |                     |     |
| 0.070679126129378    |                      |        | -0.0113645377682613   | 15327673            |     |
| 0.320107483058407    |                      |        | 4.09031326272574e-91  |                     |     |
| 2.32329793322822e-90 | 100                  | 100    |                       |                     |     |
| IRF9-regulon         | Memory               | LGALS3 |                       |                     |     |
| 0.0270434442752362   |                      |        | -0.0070405039548304   | 15876383            |     |
| 0.331566898785046    |                      |        | 4.12843418668982e-80  | 2.0215091534826e-79 |     |
| 100                  | 100                  |        |                       |                     |     |
| JUN-regulon          | Memory               | LGALS3 |                       |                     |     |
| 0.0844391100827837   |                      |        | -0.00405784394596755  | 19551272            |     |
| 0.408314326023938    |                      |        | 5.88795882354897e-25  |                     |     |
| 1.03221006536291e-24 | 100                  | 100    |                       |                     |     |
| JUNB-regulon         | Memory               | LGALS3 |                       |                     |     |
| 0.157978829787301    |                      |        | -0.00184767852772305  | 22250299.5          |     |
| 0.464681584102214    |                      |        | 7.05773820045158e-05  |                     |     |
| 9.27961874503818e-05 | 100                  | 100    |                       |                     |     |
| JUND-regulon         | Memory               | LGALS3 |                       |                     |     |
| 0.0297969543649141   |                      |        | -0.00887209477446265  | 13575202            |     |
| 0.283508380184615    |                      |        | 4.37915602556936e-131 |                     |     |
| 3.4546675312825e-130 | 100                  | 100    |                       |                     |     |
| KLF11-regulon        | Memory               | LGALS3 | 0.034037231303346     |                     |     |
| 0.0123960567625821   |                      |        | 28185290.5            | 0.588629624420161   |     |
| 4.13875736481594e-29 |                      |        | 7.94193980816031e-29  | 54.6716003700278    |     |
| 40.5215035557061     |                      |        |                       |                     |     |
| KLF12-regulon        | Memory               | LGALS3 |                       |                     |     |
| 0.0399734055829159   |                      |        | -0.00724891128247188  | 19470861            |     |
| 0.406634999826138    |                      |        | 8.08470273892432e-26  |                     |     |
| 1.47183049862468e-25 |                      |        | 98.8899167437558      | 98.595778304549     |     |
| KLF13-regulon        | Memory               | LGALS3 |                       |                     |     |
| 0.0643224344896424   |                      |        | -0.00201773305545525  | 23387337            |     |
| 0.488427798695129    |                      |        | 0.192847172656156     | 0.207456806948289   |     |
| 100                  | 100                  |        |                       |                     |     |



KLF2-regulon Memory LGALS3  
 0.106306531524656 -0.00260386793701071 22276600  
 0.465230851225683 9.13369788165462e-05  
 0.000118989458641739 100 100  
 KLF3-regulon Memory LGALS3  
 0.0545269249928294 -0.0179294280118328 17056365.5  
 0.356209988974142 6.92427297223922e-59  
 2.09201438735738e-58 100 99.8600293486849  
 KLF4-regulon Memory LGALS3  
 0.0138751245336043 -0.00207407819622841 23157111  
 0.483619693420793 0.04859714860773 0.0547682150976005  
 48.7511563367253 49.8385822327577  
 KLF6-regulon Memory LGALS3 0.0939067706780598  
 0.0251254617522905 36482989.5 0.761921130708576  
 6.27284782746987e-191 1.27249198785817e-189 100 100  
 KLF7-regulon Memory LGALS3 0.0501772122350502  
 0.0042804481187163 26730066.5 0.558238312449571  
 5.61952548502257e-11 8.86636243192451e-11 99.722479185939  
 97.5031041878316  
 KLF8-regulon Memory LGALS3  
 0.0202817978951189 -0.00494267599173229 21827453  
 0.455850737512843 5.8508886179425e-07  
 8.39218367422056e-07 79.0934320074006 77.600180607292  
 MAFB-regulon Memory LGALS3  
 0.0520817254619758 -0.00379150558466821 20717894  
 0.432678391730492 3.57450115828369e-14  
 5.83424326984235e-14 100 99.9977424088498  
 MAFF-regulon Memory LGALS3  
 0.00800286755855251 -0.004491064608155 22296671  
 0.465650019699101 1.23462659869743e-06  
 1.73581165361421e-06 22.8492136910268 28.6849531549836  
 MAFG-regulon Memory LGALS3 0.0414905905958775  
 0.0164757422805062 30962600 0.646631746054619  
 1.07599180292186e-65 3.55327525616055e-65 77.0582793709528  
 58.1510328479512  
 MAX-regulon Memory LGALS3 0.203588557247816  
 0.00606278194109516 30041120.5 0.627387306051566  
 1.32791200328151e-46 3.36720543689239e-46 100 100  
 MAZ-regulon Memory LGALS3 0.139757596472387  
 0.00353807142058016 29463676 0.61532779085308  
 1.63778645990531e-38 3.81255208699269e-38 100 100  
 MEF2A-regulon Memory LGALS3  
 0.0344038246109813 -0.00650547158316579 17803568  
 0.371814778534172 3.62873454513379e-47  
 9.36873282561816e-47 100 99.9977424088498  
 MLX-regulon Memory LGALS3  
 0.0523623685629928 -0.000576831162274048 23877685  
 0.49866836581205 0.880886296599154 0.880886296599154 100  
 99.9887120442488  
 MXD4-regulon Memory LGALS3 0.101243472236514

|                       |                       |                   |                     |     |
|-----------------------|-----------------------|-------------------|---------------------|-----|
| 0.00929579804086815   | 28902530              | 0.603608658164883 |                     |     |
| 1.8666848500302e-31   | 3.7867035529184e-31   |                   | 93.9870490286771    |     |
| 88.4727395868608      |                       |                   |                     |     |
| MXI1-regulon          | Memory                | LGALS3            |                     |     |
| 0.057264673781639     | -0.00815925713294184  |                   | 19117843.5          |     |
| 0.399262481936399     | 8.71799156489664e-30  |                   | 1.7193816697435e-29 |     |
| 100                   | 100                   |                   |                     |     |
| MYBL1-regulon         | Memory                | LGALS3            |                     |     |
| 0.0149872849134535    | -0.0152666335622642   |                   | 17674407            |     |
| 0.369117343468894     | 1.78290208957615e-49  |                   |                     |     |
| 4.68837216147803e-49  | 70.3977798334875      | 80.2957444406818  |                     |     |
| MYC-regulon           | Memory                | LGALS3            | 0.358857795266535   |     |
| 0.0450492520001228    | 37023014              | 0.773199155982528 |                     |     |
| 1.52995840635432e-207 | 4.34508187404626e-206 |                   | 100                 | 100 |
| NFATC1-regulon        | Memory                | LGALS3            |                     |     |
| 0.0459964951898975    | -0.00463168844647067  |                   | 22889705.5          |     |
| 0.478035120892335     | 0.0134416937371375    |                   | 0.0156452500874879  |     |
| 95.7446808510638      | 94.8052827632916      |                   |                     |     |
| NFE2L1-regulon        | Memory                | LGALS3            | 0.284024204490351   |     |
| 0.103830636484267     | 40090110              | 0.837253261315967 | 0                   | 0   |
| 100                   | 99.934529856643       |                   |                     |     |
| NFE2L2-regulon        | Memory                | LGALS3            | 0.125308407377581   |     |
| 0.0147799848221324    | 33766870              | 0.705196918440291 |                     |     |
| 5.76532700456961e-118 | 3.89845921261373e-117 |                   | 100                 | 100 |
| NFKB1-regulon         | Memory                | LGALS3            | 0.0814371814952032  |     |
| 0.0253728463873968    | 36004503.5            | 0.751928292973931 |                     |     |
| 8.57716477693151e-177 | 1.35328599813808e-175 |                   | 100                 |     |
| 99.9300146743425      |                       |                   |                     |     |
| NFKB2-regulon         | Memory                | LGALS3            | 0.0967605108757047  |     |
| 0.0239545921713486    | 37846794              | 0.790403211835876 |                     |     |
| 3.13873280611868e-234 | 1.48566686156284e-232 |                   | 100                 | 100 |
| NFYA-regulon          | Memory                | LGALS3            | 0.0271783790344958  |     |
| 0.00638201269607865   | 31609819              | 0.660148451759235 |                     |     |
| 1.32614563664769e-72  | 5.08953190281006e-72  |                   | 99.8149861239593    |     |
| 98.9976295292922      |                       |                   |                     |     |
| NFYB-regulon          | Memory                | LGALS3            | 0.109371692364043   |     |
| 0.000765020870825278  | 28445672.5            | 0.594067516176706 |                     |     |
| 3.48717261850872e-26  | 6.43088976400309e-26  |                   | 100                 | 100 |
| NFYC-regulon          | Memory                | LGALS3            | 0.0861043566470529  |     |
| 0.00263232828778572   | 28690094.5            | 0.599172094753252 |                     |     |
| 6.42105344253503e-29  | 1.21571945178663e-28  |                   | 100                 | 100 |
| NR1H3-regulon         | Memory                | LGALS3            |                     |     |
| 0.00761249141062906   | -0.000944395334248558 |                   | 23510412            |     |
| 0.490998132005176     | 0.163042448034333     |                   | 0.176733035273857   |     |
| 20.3515263644773      | 22.1469691838808      |                   |                     |     |
| NR2C2-regulon         | Memory                | LGALS3            | 0.0336334482236256  |     |
| 0.0121364074003189    | 31567027.5            | 0.659254781900718 |                     |     |
| 8.44671029797554e-73  | 3.33175795086813e-72  |                   | 89.5467160037003    |     |
| 75.6473642623321      |                       |                   |                     |     |
| NR3C1-regulon         | Memory                | LGALS3            |                     |     |

|                      |                      |                       |                      |                  |
|----------------------|----------------------|-----------------------|----------------------|------------------|
| 0.224376736757318    |                      | -0.00112771432025874  |                      | 21765768.5       |
| 0.454562500868003    |                      | 3.17053406761454e-07  |                      |                  |
| 4.68974830834651e-07 |                      | 100                   | 100                  |                  |
| NRF1-regulon         | Memory               | LGALS3                | 0.0275901319517371   |                  |
| 0.0008819774883181   |                      | 25972608              | 0.542419333668108    |                  |
| 1.81152770766096e-06 |                      | 2.49744596590151e-06  |                      | 100              |
| 99.9661361327464     |                      |                       |                      |                  |
| PAX5-regulon         | Memory               | LGALS3                |                      |                  |
| 0.0904777070946132   |                      | -0.0100288919158046   |                      | 16455277.5       |
| 0.343656696196001    |                      | 2.78267434666981e-69  |                      |                  |
| 9.87849393067782e-69 |                      | 100                   | 100                  |                  |
| POU2F1-regulon       | Memory               | LGALS3                |                      |                  |
| 0.00293901378953346  |                      | -0.00198833553115466  |                      | 22611853.5       |
| 0.472232380686256    |                      | 3.66978168321014e-06  |                      |                  |
| 5.01066345207539e-06 |                      | 13.0434782608696      | 18.4761259735862     |                  |
| POU6F1-regulon       | Memory               | LGALS3                |                      |                  |
| 0.0236318135715141   |                      | -0.00755018562216687  |                      | 21207636         |
| 0.44290630297103     | 5.28835276139053e-11 |                       | 8.43759654064556e-11 |                  |
| 59.2969472710453     | 65.5017496331414     |                       |                      |                  |
| REL-regulon          | Memory               | LGALS3                | 0.276394843447163    |                  |
| 0.0129923810839181   |                      | 32458666.5            | 0.677876024413311    |                  |
| 3.98420995751513e-89 |                      | 2.09539931098944e-88  |                      | 100              |
| RELA-regulon         | Memory               | LGALS3                | 0.0969042541531773   |                  |
| 0.00495790549610019  |                      | 29910768              | 0.624664987361353    |                  |
| 1.04517443002408e-44 |                      | 2.6037678783056e-44   |                      | 100              |
| RELB-regulon         | Memory               | LGALS3                | 0.110403685041711    |                  |
| 0.00534739818501576  |                      | 29426202              | 0.614545173177186    |                  |
| 5.15053708916554e-38 |                      | 1.16091470898652e-37  |                      | 100              |
| REST-regulon         | Memory               | LGALS3                |                      |                  |
| 0.217931359696468    |                      | -0.000703881060972023 |                      | 22452870.5       |
| 0.46891213448978     | 0.000468281602533023 |                       | 0.000583298136488502 | 100              |
|                      | 100                  |                       |                      |                  |
| RFX5-regulon         | Memory               | LGALS3                |                      |                  |
| 0.0644553624923836   |                      | -0.000914908001141926 |                      | 25420787.5       |
| 0.530894957374653    |                      | 0.000507880547123963  |                      |                  |
| 0.000627122066883502 |                      | 100                   | 100                  |                  |
| RXRA-regulon         | Memory               | LGALS3                | 0.0171399505349551   |                  |
| 0.00267350307607055  |                      | 26239383.5            | 0.547990749097355    |                  |
| 3.23985715134969e-08 |                      | 4.89425229246442e-08  |                      | 71.4153561517114 |
| 64.0884975730895     |                      |                       |                      |                  |
| SETDB1-regulon       | Memory               | LGALS3                |                      |                  |
| 0.058447095402557    |                      | -0.00130143583764314  |                      | 23176881.5       |
| 0.48403258616673     | 0.072351348065614    |                       | 0.0802647767602905   |                  |
| 95.2821461609621     | 95.0468450163675     |                       |                      |                  |
| SOX5-regulon         | Memory               | LGALS3                | 0.00793741040941297  |                  |
| 0.000137379707470529 |                      | 24439694.5            | 0.510405532079879    |                  |
| 0.109215949148356    |                      | 0.120222207589664     |                      | 24.7918593894542 |
| 22.4381984422621     |                      |                       |                      |                  |
| SP1-regulon          | Memory               | LGALS3                |                      |                  |
| 0.00975065115035066  |                      | -0.0033223720000914   |                      | 21737905.5       |

|                      |                       |                     |
|----------------------|-----------------------|---------------------|
| 0.453980602050064    | 8.55261389901951e-08  | 1.2783907091166e-07 |
| 55.4116558741906     | 59.9300146743425      |                     |
| SP2-regulon          | Memory LGALS3         |                     |
| 0.0280070301983931   | -0.000238816212259966 | 23646858.5          |
| 0.493847719524895    | 0.488744941444506     | 0.499293393418129   |
| 100                  | 100                   |                     |
| SP3-regulon          | Memory LGALS3         |                     |
| 0.0237569885676153   | -0.00462304736816426  | 16333539.5          |
| 0.341114285174278    | 1.71317395573664e-71  |                     |
| 6.40186057143692e-71 | 100                   | 100                 |
| SP4-regulon          | Memory LGALS3         |                     |
| 0.00630874457633906  | -0.00238602234542373  | 22489035.5          |
| 0.469667414637315    | 2.05446572136572e-05  |                     |
| 2.72648721900871e-05 | 23.5892691951896      | 29.1477593407834    |
| SPI1-regulon         | Memory LGALS3         |                     |
| 0.415157464297454    | -0.00346813535989104  | 21864107            |
| 0.456616230075479    | 1.05061121324965e-06  |                     |
| 1.49186792281451e-06 | 100                   | 100                 |
| SPIB-regulon         | Memory LGALS3         | 0.573591710449433   |
| 0.0093635600259796   | 28268492.5            | 0.590367238655892   |
| 2.72979255418064e-24 | 4.72720174016647e-24  | 100                 |
| SREBF1-regulon       | Memory LGALS3         | 0.048677024064476   |
| 0.00793620961144995  | 29248819              | 0.610840656146626   |
| 1.04892997722584e-35 | 2.19041259950101e-35  | 99.0749306197965    |
| 96.8416299808105     |                       |                     |
| SREBF2-regulon       | Memory LGALS3         |                     |
| 0.0983165656403765   | -0.000682323470889951 | 22923730.5          |
| 0.478745708671124    | 0.0167698776780656    | 0.0193603465876854  |
| 100                  | 100                   |                     |
| SRF-regulon          | Memory LGALS3         | 0.021879574761413   |
| 0.00113749739178909  | 25571580.5            | 0.534044161281393   |
| 0.000127645323344543 | 0.000163294017251578  | 98.7974098057354    |
| 97.9139857771758     |                       |                     |
| STAT1-regulon        | Memory LGALS3         |                     |
| 0.0788837778917422   | -0.000906323858804542 | 22934505            |
| 0.478970726394049    | 0.0179623339901688    | 0.0205697695693868  |
| 100                  | 100                   |                     |
| STAT2-regulon        | Memory LGALS3         |                     |
| 0.0537440510786676   | -0.0127951239326764   | 15996933            |
| 0.334084499276829    | 8.64637242414836e-78  |                     |
| 3.96059640073893e-77 | 100                   | 99.9616209504459    |
| STAT5A-regulon       | Memory LGALS3         | 0.08153654947251    |
| 32530017             | 0.679366128551751     | 0.0101710271935106  |
| 7.41865154244198e-90 | 100                   | 100                 |
| TBP-regulon          | Memory LGALS3         |                     |
| 0.0186080660402272   | -0.00234916372861436  | 22857365.5          |
| 0.477359723132864    | 0.00643163266819118   | 0.00761076532402623 |
| 46.3459759481961     | 49.971780110622       |                     |
| TCF12-regulon        | Memory LGALS3         | 0.00957388908621255 |
| 0.000543114477409245 | 24881738              | 0.519637294278051   |

|                       |                  |                       |                    |                  |
|-----------------------|------------------|-----------------------|--------------------|------------------|
| 0.00376776271051324   |                  | 0.00453408732960067   |                    | 29.6947271045328 |
| 25.1111863641495      |                  |                       |                    |                  |
| TFDP1-regulon         | Memory           | LGALS3                | 0.540642823329645  |                  |
| 0.0127840782603946    |                  | 30607825.5            | 0.639222534477082  |                  |
| 2.56244557112503e-55  |                  | 7.27734542199509e-55  | 100                | 100              |
| TFDP2-regulon         | Memory           | LGALS3                |                    |                  |
| 0.0223213335926375    |                  | -0.00491900643623675  | 17510825.5         |                  |
| 0.365701060890324     |                  | 1.3401734668611e-51   |                    |                  |
| 3.73146337831913e-51  |                  | 99.9074930619797      | 99.9977424088498   |                  |
| TFEC-regulon          | Memory           | LGALS3                | 0.131604239891987  |                  |
| 0.0410404069476579    |                  | 41719330              | 0.871278355245647  | 0 0              |
| 100                   | 100              |                       |                    |                  |
| THAP1-regulon         | Memory           | LGALS3                | 0.0372866152948135 |                  |
| 0.000124467466326619  |                  | 24345431              | 0.508436906331582  |                  |
| 0.342421204868959     |                  | 0.356124058276154     | 100                | 100              |
| THAP11-regulon        | Memory           | LGALS3                | 0.182689680036914  |                  |
| 0.00431476137377865   |                  | 29359862.5            | 0.61315972018818   |                  |
| 3.84170041017932e-37  |                  | 8.26547664008279e-37  | 100                | 100              |
| TP53-regulon          | Memory           | LGALS3                | 0.109011236406762  |                  |
| 0.0109145637026304    |                  | 31795991              | 0.664036520765923  |                  |
| 4.43076837885903e-76  |                  | 1.85049738175877e-75  | 100                | 100              |
| USF2-regulon          | Memory           | LGALS3                |                    |                  |
| 0.120285783648163     |                  | -0.0051224545486207   | 18362147           |                  |
| 0.383480301264157     |                  | 2.81836633262855e-39  |                    |                  |
| 6.67013365388756e-39  |                  | 100                   | 100                |                  |
| XBP1-regulon          | Memory           | LGALS3                |                    |                  |
| 0.193360211665938     |                  | -0.0019767473513069   | 26476352.5         |                  |
| 0.552939677101813     |                  | 2.56554049121511e-09  |                    |                  |
| 3.91727687905963e-09  |                  | 100                   | 100                |                  |
| YBX1-regulon          | Memory           | LGALS3                | 0.0965789696536433 |                  |
| 0.00142925709366783   |                  | 27037863              | 0.564666422111696  |                  |
| 3.41778006371225e-13  |                  | 5.51505419371749e-13  | 100                | 100              |
| YY1-regulon           | Memory           | LGALS3                | 0.665094237744678  |                  |
| 0.0262482212778856    |                  | 33471291.5            | 0.699023972965712  |                  |
| 4.31620134306049e-111 |                  | 2.7859117759754e-110  | 100                | 100              |
| YY2-regulon           | Memory           | LGALS3                |                    |                  |
| 0.0391018691841594    |                  | -0.0121906066303688   | 19107653.5         |                  |
| 0.399049671077741     |                  | 6.27322020684229e-30  |                    |                  |
| 1.25464404136846e-29  |                  | 86.8640148011101      | 90.6197087707416   |                  |
| ZBTB33-regulon        | Memory           | LGALS3                | 0.368196082680812  |                  |
| 0.00242790941401261   |                  | 24431648              | 0.510237486684963  |                  |
| 0.249317369737237     |                  | 0.264201988826027     | 100                | 100              |
| ZNF143-regulon        | Memory           | LGALS3                |                    |                  |
| 0.0228633572488197    |                  | -0.000478784756809687 | 23321650.5         |                  |
| 0.487055983143876     |                  | 0.145234835029843     | 0.158641127494136  |                  |
| 100                   | 99.9932272265493 |                       |                    |                  |
| ZNF274-regulon        | Memory           | LGALS3                |                    |                  |
| 0.0626963511716302    |                  | -0.00270973405284228  | 21897131.5         |                  |
| 0.457305923127664     |                  | 1.55290709240591e-06  |                    |                  |
| 2.16189026589842e-06  |                  | 100                   | 100                |                  |

|                       |         |                       |                 |                       |     |
|-----------------------|---------|-----------------------|-----------------|-----------------------|-----|
| ZNF76-regulon         | Memory  | LGALS3                |                 |                       |     |
| 0.0116782396322569    |         | -0.00294912450185108  |                 | 18593536.5            |     |
| 0.388312705403464     |         | 3.16568367617834e-36  |                 | 6.7093594330944e-36   |     |
| 99.3524514338575      |         | 99.4626933062422      |                 |                       |     |
| ATF1-regulon          | Naive 1 | 0.0994937483497286    |                 | -0.0076685341756237   |     |
| 77407532              |         | 0.350859097800407     |                 | 3.4929913243409e-284  |     |
| 8.70183803607732e-284 |         | 100                   | 100             |                       |     |
| ATF3-regulon          | Naive 1 | 0.0472146595641573    |                 | -0.0043363608761183   |     |
| 98865570              |         | 0.44812027715498      |                 | 5.03404072686619e-36  |     |
| 6.8079407925238e-36   |         | 100                   | 100             |                       |     |
| ATF4-regulon          | Naive 1 | 0.100615083535986     |                 | -0.0092676464891993   |     |
| 84786916              |         | 0.384307057523019     |                 | 7.57246978229657e-172 |     |
| 1.62922834710017e-171 |         | 100                   | 100             |                       |     |
| ATF5-regulon          | Naive 1 | 0.104883315570558     |                 | -0.0154337696663472   |     |
| 79303336              |         | 0.359452061093003     |                 | 1.277143390204e-252   |     |
| 3.07380273574522e-252 |         | 100                   | 99.997489833827 |                       |     |
| ATF6-regulon          | Naive 1 |                       |                 |                       |     |
| 0.130336464396129     |         | -0.00692233002360701  |                 | 99983994.5            |     |
| 0.453189672869959     |         | 1.21440988667672e-29  |                 |                       |     |
| 1.58207526521187e-29  |         | 100                   | 100             |                       |     |
| ATF6B-regulon         | Naive 1 | 0.0603519042839175    |                 | 0.00348013220587956   |     |
| 129952517.0625        |         | 0.589025663464387     |                 |                       |     |
| 1.38860981788416e-102 |         | 2.34741183499465e-102 |                 | 99.9277717587577      |     |
| 99.919674682464       |         |                       |                 |                       |     |
| BACH1-regulon         | Naive 1 | 0.0465746590538568    |                 | 0.00374942937768467   |     |
| 122576137             |         | 0.555591319455568     |                 | 4.1555646046626e-41   |     |
| 5.67394397944317e-41  |         | 99.9277717587577      |                 | 99.5130277624379      |     |
| BATF-regulon          | Naive 1 |                       |                 |                       |     |
| 0.0139177459823071    |         | -0.00612288663655771  |                 | 101015870.5           |     |
| 0.457866776932673     |         | 3.32316725021758e-27  |                 | 4.1760154825743e-27   |     |
| 46.4969302997472      |         | 52.4423916863296      |                 |                       |     |
| BATF3-regulon         | Naive 1 | 0.0582674717802224    |                 | -0.0283570307705884   |     |
| 50659151.5            |         | 0.229618794597716     |                 | 0                     | 0   |
| 100                   |         |                       |                 | 100                   |     |
| BCL11A-regulon        | Naive 1 | 0.222128861398929     |                 | 0.0200791245352361    |     |
| 164088930.5           |         | 0.743753128755787     |                 | 0                     | 0   |
| 100                   |         |                       |                 | 100                   |     |
| BHLHE40-regulon       | Naive 1 | 0.0578154410036894    |                 | 0.0024651255707324    |     |
| 119337457.5           |         | 0.540911608863133     |                 | 4.9832117767633e-23   |     |
| 6.1001385543137e-23   |         | 100                   | 100             |                       |     |
| BRF2-regulon          | Naive 1 |                       |                 |                       |     |
| 0.034858185078847     |         | -0.00769306493605722  |                 | 81954186              |     |
| 0.371467362645366     |         | 1.27544999755072e-211 |                 |                       |     |
| 2.87482380400321e-211 |         | 99.2777175875767      |                 | 99.7916562076409      |     |
| CEBPB-regulon         | Naive 1 | 0.133391567450104     |                 | -0.0110489429042689   |     |
| 75490017.5            |         | 0.342167729013592     |                 | 0                     | 0   |
| 100                   |         |                       |                 | 100                   |     |
| CEBPG-regulon         | Naive 1 | 0.0554359809430864    |                 | -0.0143797575925541   |     |
| 73488941              |         | 0.333097605250706     |                 | 0                     | 100 |
|                       |         |                       |                 | 0                     | 100 |
| CLOCK-regulon         | Naive 1 | 0.0187798840378498    |                 | 0.00362793507249291   |     |

|                         |                       |                      |         |
|-------------------------|-----------------------|----------------------|---------|
| 118355922.5             | 0.536462681534465     |                      |         |
| 7.07503329756486e-21    | 8.51402312079839e-21  | 54.9656915854099     |         |
| 50.5547467242331        |                       |                      |         |
| CREB1-regulon Naive 1   | 0.0492961263910224    | 0.00720417751933879  |         |
| 138655441               | 0.628472729687049     |                      |         |
| 1.99961178805767e-211   | 4.43663865475295e-211 | 100                  |         |
| 99.992469501481         |                       |                      |         |
| CREB3-regulon Naive 1   | 0.224781223646112     | -0.0171065969504268  |         |
| 62224358                | 0.282039506298813     | 0                    | 100 100 |
| CREB3L2-regulon Naive 1 | 0.123236992003311     | -0.004032346188278   |         |
| 113297014.5             | 0.513532562838325     | 0.00108034482308597  |         |
| 0.00113636270280154     | 100                   | 100                  |         |
| CREB3L4-regulon Naive 1 | 0.0158198948768453    | 0.00537449010288813  |         |
| 121167513               | 0.549206559045173     |                      |         |
| 2.45377281810306e-47    | 3.44985881357064e-47  | 38.4976525821596     |         |
| 30.3529293639239        |                       |                      |         |
| CREB5-regulon Naive 1   | 0.0335759235329488    | -0.0063766380931176  |         |
| 97058434                | 0.439929212407397     | 1.05032201162358e-47 |         |
| 1.49145725650548e-47    | 99.4763452509931      | 99.6435564034339     |         |
| CREM-regulon Naive 1    | 0.13766876480289      | -0.014044933823086   |         |
| 51721588.5              | 0.23443442012741      | 0                    | 100 100 |
| CTCF-regulon Naive 1    | 0.359900051749704     | -0.0124610299878272  |         |
| 77332371.5              | 0.350518423649729     |                      |         |
| 1.79197568762747e-285   | 4.54393835076966e-285 | 100                  | 100     |
| CUX1-regulon Naive 1    | 0.0770654149720365    |                      |         |
| 0.000418415809331815    | 120613697             | 0.546696320350217    |         |
| 1.6613733006394e-29     | 2.14468189718904e-29  | 100                  | 100     |
| DDIT3-regulon Naive 1   |                       |                      |         |
| 0.0811873789364411      | -0.00423798067115229  | 100991866            |         |
| 0.457757973603132       | 1.91553108279682e-24  |                      |         |
| 2.36526446745346e-24    | 100                   | 100                  |         |
| E2F1-regulon Naive 1    | 0.391633917757274     | -0.0524640903273461  |         |
| 32171056.5              | 0.145819244810388     | 0                    | 0 100   |
| 100                     |                       |                      |         |
| E2F2-regulon Naive 1    |                       |                      |         |
| 0.0513125982131878      | -0.00297099428319698  | 104433276.5          |         |
| 0.473356587226298       | 1.23001521192886e-10  |                      |         |
| 1.35397023328604e-10    | 100                   | 100                  |         |
| E2F3-regulon Naive 1    | 0.0234027207777438    | 0.00260539932583722  |         |
| 130919986.5             | 0.593410836912246     |                      |         |
| 1.00287736237646e-112   | 1.8026403222463e-112  | 100                  | 100     |
| E2F4-regulon Naive 1    | 0.353657985015137     | -0.0512550574318989  |         |
| 30952360.5              | 0.140295356268728     | 0                    | 0 100   |
| 100                     |                       |                      |         |
| E2F6-regulon Naive 1    | 0.0536957696693749    | -0.0213057504177513  |         |
| 52954546                | 0.24002295066054      | 0                    | 0 100   |
| E2F7-regulon Naive 1    | 0.0354598892540277    | 0.00556506035835446  |         |
| 150103984.5             | 0.680364652084713     | 0                    | 0 100   |
| 100                     |                       |                      |         |
| E2F8-regulon Naive 1    | 0.0654653223913124    | -0.0106284588377597  |         |

|                       |                       |                      |     |     |
|-----------------------|-----------------------|----------------------|-----|-----|
| 66721051.5            | 0.302421319072471     | 0                    | 0   | 100 |
| 100                   |                       |                      |     |     |
| EGR1-regulon Naive 1  | 0.0500650007017968    | 0.00296370336024933  |     |     |
| 131650042             | 0.596719902676987     |                      |     |     |
| 1.03580837460171e-120 | 1.88570242555695e-120 | 100                  | 100 |     |
| EGR2-regulon Naive 1  |                       |                      |     |     |
| 0.0447484746515752    | -0.00148007230321334  | 108906103.5          |     |     |
| 0.493630222172279     | 0.123905107212704     | 0.127496559595681    |     |     |
| 100                   | 99.994979667654       |                      |     |     |
| EGR3-regulon Naive 1  | 0.0418686382301406    |                      |     |     |
| 0.000452752373182229  | 116594639             | 0.528479448846195    |     |     |
| 6.0245906198417e-12   | 6.68353021888689e-12  | 100                  |     |     |
| 99.994979667654       |                       |                      |     |     |
| ELF1-regulon Naive 1  | 0.687322608464808     | -0.0224636504756074  |     |     |
| 69210981.5            | 0.313707231060805     | 0                    | 0   | 100 |
| 100                   |                       |                      |     |     |
| ELF2-regulon Naive 1  | 0.0442620588940406    | 0.0132193813439121   |     |     |
| 158037844             | 0.71632583976662      | 0                    | 100 |     |
| 99.4703549374969      |                       |                      |     |     |
| ELF4-regulon Naive 1  | 0.0225365206809891    | 0.00465790117239422  |     |     |
| 137129262             | 0.621555136874221     |                      |     |     |
| 1.72441414729292e-189 | 3.76718167562453e-189 | 99.3318887685085     |     |     |
| 98.1977006877855      |                       |                      |     |     |
| ELK1-regulon Naive 1  |                       |                      |     |     |
| 0.0614904884425879    | -0.00519900535624154  | 86118789.5           |     |     |
| 0.390343936913441     | 1.37313760747579e-154 |                      |     |     |
| 2.8674344156112e-154  | 100                   | 100                  |     |     |
| ELK3-regulon Naive 1  | 0.0720072214241673    | 0.00808900305163454  |     |     |
| 140401932             | 0.636388913561462     |                      |     |     |
| 5.14683585070378e-238 | 1.19811588655727e-237 | 100                  | 100 |     |
| ELK4-regulon Naive 1  | 0.0473067964898951    | 0.00263085024961334  |     |     |
| 117235869.5           | 0.531385904444238     |                      |     |     |
| 3.42268784155488e-14  | 3.88817338800635e-14  | 96.7858432647165     |     |     |
| 96.7217229780612      |                       |                      |     |     |
| ESRRA-regulon Naive 1 | 0.0720043505784193    | -0.0224742925721011  |     |     |
| 43291899              | 0.196225822381294     | 0                    | 100 | 100 |
| 0                     |                       |                      |     |     |
| ETS1-regulon Naive 1  |                       |                      |     |     |
| 0.238948848802039     | -0.00454484072752417  | 106279732            |     |     |
| 0.481725872412378     | 1.01467267567113e-05  |                      |     |     |
| 1.09154181776742e-05  | 100                   | 100                  |     |     |
| ETV2-regulon Naive 1  | 0.0338065500335476    | 0.00592802081289096  |     |     |
| 145972188.5           | 0.661636781819384     | 0                    | 0   | 100 |
| 100                   |                       |                      |     |     |
| ETV3-regulon Naive 1  | 0.0139037129649336    | 0.00281866697023079  |     |     |
| 127592860.5           | 0.578330231750616     | 3.8915024259872e-80  |     |     |
| 6.20891398303575e-80  | 88.5698808234019      | 83.7617350268588     |     |     |
| ETV5-regulon Naive 1  | 0.0343605232181816    | 0.00102155916163972  |     |     |
| 118707690             | 0.53805711071334      | 3.83805670849403e-20 |     |     |
| 4.5417004383846e-20   | 100                   | 100                  |     |     |
| ETV6-regulon Naive 1  |                       |                      |     |     |



|                       |                       |                       |                      |
|-----------------------|-----------------------|-----------------------|----------------------|
| 0.457139641586075     |                       | -0.00277378540413681  | 97438973.5           |
| 0.44165405419214      | 4.18361788389123e-45  | 5.76770620885976e-45  | 100                  |
| 100                   |                       |                       |                      |
| ETV7-regulon          | Naive 1               | 0.0667795491446797    | 0.00307928709612     |
| 132125174.5           | 0.598873498793262     | 4.66766911664367e-126 |                      |
| 8.72117124425529e-126 | 100                   | 100                   |                      |
| FLI1-regulon          | Naive 1               | 0.158577439885158     | 0.0166818982173994   |
| 150938382             | 0.68414666071479      | 0                     | 100 100              |
| FOS-regulon           | Naive 1               | 0.0978402481285551    | 0.013170092413082    |
| 171823050             | 0.778808970479956     | 0                     | 0 100                |
| 100                   |                       |                       |                      |
| FOSB-regulon          | Naive 1               | 0.0510859895881914    | 0.0109487712289061   |
| 144004631.5           | 0.652718589286248     |                       |                      |
| 7.08863431476598e-298 | 1.93574244749379e-297 | 99.9638858793788      |                      |
| 99.2343993172348      |                       |                       |                      |
| FOSL1-regulon         | Naive 1               | 0.0493429568356075    | -0.0130425529122035  |
| 78568941              | 0.356123326014236     | 1.26244018336379e-264 |                      |
| 3.09080182823549e-264 | 100                   | 100                   |                      |
| FOX01-regulon         | Naive 1               | 0.0242738808682469    | 0.00863018280789686  |
| 131614353             | 0.596558137923378     |                       |                      |
| 1.12179806554858e-134 | 2.15263953118782e-134 | 64.192849404117       |                      |
| 50.6953160299212      |                       |                       |                      |
| FOX03-regulon         | Naive 1               | 0.0285933396905618    | 0.0100796124263215   |
| 132265350.5           | 0.599508863642425     |                       |                      |
| 5.47349415445458e-150 | 1.11033738561793e-149 | 61.2314915131817      |                      |
| 44.7487323660826      |                       |                       |                      |
| GABPA-regulon         | Naive 1               | 0.0296483891654215    | 0.00473882049617964  |
| 143443792             | 0.650176515719288     |                       |                      |
| 4.10214908163135e-288 | 1.05910030834846e-287 | 100                   | 100                  |
| GTF2B-regulon         | Naive 1               | 0.0696707457804081    | -0.0106910434832852  |
| 76985897              | 0.348947985640145     | 1.85908126517254e-291 |                      |
| 4.88869517878705e-291 | 100                   | 100                   |                      |
| HINFP-regulon         | Naive 1               | 0.0194669297771729    | 0.00368628309020568  |
| 120209399             | 0.544863790260994     |                       |                      |
| 1.04426524086844e-28  | 1.33590688471457e-28  | 66.5583243048032      |                      |
| 62.7717254882273      |                       |                       |                      |
| HIVEP3-regulon        | Naive 1               | 0.0766273283909141    | -0.00120808167187847 |
| 0.493884386695695     | 0.139623347227344     | 108962178             |                      |
| 99.8916576381365      | 99.6661478989909      | 0.142636800764624     |                      |
| HOXB2-regulon         | Naive 1               | 0.0424942912525993    | 0.00614106460807957  |
| 124705682             | 0.56524374239324      | 3.45724424506867e-56  |                      |
| 5.11384044583073e-56  | 88.1545684362586      | 83.1141121542246      |                      |
| IKZF1-regulon         | Naive 1               | 0.138099911529778     | -0.00656552327712498 |
| 0.334624996947279     | 0                     | 0                     | 100 73825918.5       |
| IRF1-regulon          | Naive 1               | 0.149349487525028     | 0.0158403036175607   |
| 172170828             | 0.780385316762574     | 0                     | 0 100                |
| 100                   |                       |                       |                      |
| IRF2-regulon          | Naive 1               | 0.0900292861270492    | 0.00570516201620068  |

|                       |                       |                      |     |
|-----------------------|-----------------------|----------------------|-----|
| 130488696.5           | 0.591455962284667     |                      |     |
| 3.88105659680692e-108 | 6.80382761415534e-108 | 100                  | 100 |
| IRF3-regulon Naive 1  | 0.146481022987133     | 0.00117830231278998  |     |
| 116949100.5           | 0.53008608890927      | 3.67171457483785e-13 |     |
| 4.1053816506061e-13   | 100                   | 100                  |     |
| IRF4-regulon Naive 1  | 0.0552074463067239    | -0.0036504270505531  |     |
| 102303098.5           | 0.463701295138775     |                      |     |
| 1.82241117705306e-18  | 2.1211671077175e-18   | 100                  |     |
| 99.994979667654       |                       |                      |     |
| IRF5-regulon Naive 1  | 0.0515533448302869    | 0.00513534089767739  |     |
| 120611296.5           | 0.546685439790632     | 1.0589565709822e-29  |     |
| 1.39233178777289e-29  | 87.5406283856988      | 79.4969626989307     |     |
| IRF7-regulon Naive 1  | 0.118415842049717     | 0.0120520638265773   |     |
| 161846513             | 0.733589097419123     | 0                    | 100 |
| 100                   |                       |                      |     |
| IRF8-regulon Naive 1  | 0.0841484707000638    | 0.00270577787023209  |     |
| 126938504             | 0.575364280953608     |                      |     |
| 4.80948972213702e-74  | 7.42334283199409e-74  | 100                  | 100 |
| IRF9-regulon Naive 1  | 0.043424841370145     | 0.0108304420879404   |     |
| 164488023             | 0.745562064280161     | 0                    | 100 |
| 100                   |                       |                      |     |
| JUN-regulon Naive 1   | 0.103617744186319     | 0.0173328857747727   |     |
| 177013491             | 0.802335278571606     | 0                    | 100 |
| 100                   |                       |                      |     |
| JUNB-regulon Naive 1  | 0.172318224164827     | 0.0142783633437699   |     |
| 151605668.5           | 0.687171218316812     | 0                    | 100 |
| 100                   |                       |                      |     |
| JUND-regulon Naive 1  | 0.0476704440389509    | 0.0104934492046354   |     |
| 165661359.5           | 0.750880355345252     | 0                    | 100 |
| 100                   |                       |                      |     |
| KLF11-regulon Naive 1 | 0.0271044928369587    | 0.00588642486188523  |     |
| 120149517.5           | 0.544592370044872     |                      |     |
| 1.13102073391237e-33  | 1.51514098316563e-33  | 47.7609245214879     |     |
| 39.8990913198454      |                       |                      |     |
| KLF12-regulon Naive 1 | 0.0497890609114082    | 0.00312025329907564  |     |
| 119047274.5           | 0.539596318955983     |                      |     |
| 1.12958580697511e-21  | 1.37095029564501e-21  | 99.4221740700614     |     |
| 98.4888799638536      |                       |                      |     |
| KLF13-regulon Naive 1 | 0.0708781995398091    | 0.00522362842574867  |     |
| 151096918             | 0.6848652445075       | 0                    | 100 |
| KLF2-regulon Naive 1  | 0.131527237544162     | 0.0258315283415644   |     |
| 178960003             | 0.811158082070595     | 0                    | 100 |
| 100                   |                       |                      |     |
| KLF3-regulon Naive 1  | 0.112243181356895     | 0.0458042279981848   |     |
| 186938844.5           | 0.847323156164191     | 0                    | 100 |
| 99.844369697274       |                       |                      |     |
| KLF4-regulon Naive 1  | 0.0214004139328155    | 0.00626528033728269  |     |
| 123637415.5           | 0.560401693942446     |                      |     |
| 6.25732321329554e-55  | 9.1602051163708e-55   | 56.0671722643554     |     |
| 48.9432200411667      |                       |                      |     |

|                       |         |                       |                      |
|-----------------------|---------|-----------------------|----------------------|
| KLF6-regulon          | Naive 1 | 0.0807844361043295    | 0.0129899411290758   |
| 144275732.5           |         | 0.653947387696625     |                      |
| 1.18315202897658e-302 |         | 3.29426643362106e-302 | 100 100              |
| KLF7-regulon          | Naive 1 | 0.0613758611132589    | 0.017514743232997    |
| 152004298.5           |         | 0.68897805750342 0    | 0                    |
| 99.783315276273       |         | 97.2463477082183      |                      |
| KLF8-regulon          | Naive 1 | 0.0415582765348026    | 0.0187385325995408   |
| 157057988             |         | 0.711884522710622     | 0 0                  |
| 93.1022029613579      |         | 75.4857171544756      |                      |
| MAFB-regulon          | Naive 1 | 0.0602032133855988    | 0.0050347882963361   |
| 130632100             |         | 0.592105956171973     |                      |
| 1.18633197159836e-109 |         | 2.10573924958709e-109 | 100                  |
| 99.997489833827       |         |                       |                      |
| MAFF-regulon          | Naive 1 | 0.0204373536110149    | 0.0091695248832348   |
| 126205845             |         | 0.572043414506976     |                      |
| 1.08977685881451e-105 |         | 1.8871745603861e-105  | 39.4185626579993     |
| 27.034489683217       |         |                       |                      |
| MAFG-regulon          | Naive 1 | 0.0265017800268877    | 0.00124656699474225  |
| 111967991.5           |         | 0.507508603687477     | 0.0598842675395348   |
| 0.0620698247490069    |         | 58.974358974359       | 58.5496259852402     |
| MAX-regulon           | Naive 1 | 0.201556532689019     | 0.00442657210956376  |
| 128429075.5           |         | 0.582120478421536     |                      |
| 1.46210659635637e-87  |         | 2.41417600793726e-87  | 100 100              |
| MAZ-regulon           | Naive 1 | 0.125682996290055     | -0.0120972484637506  |
| 58728904              |         | 0.266195933907914 0   | 0 100 100            |
| MEF2A-regulon         | Naive 1 | 0.0487408300644686    | 0.00909674420606227  |
| 148739420             |         | 0.674179596742031     | 0 0 100              |
| 99.997489833827       |         |                       |                      |
| MLX-regulon           | Naive 1 | 0.0551449199680047    | 0.00252799629049878  |
| 120181148.5           |         | 0.544735741417602     |                      |
| 3.23505521427361e-27  |         | 4.10158786095404e-27  | 100                  |
| 99.987449169135       |         |                       |                      |
| MXD4-regulon          | Naive 1 | 0.0628867628255257    | -0.0333529964358842  |
| 92839121              |         | 0.420804660645205     | 1.09845476034119e-81 |
| 1.77250654509601e-81  |         | 82.6110509209101      | 89.4372207440133     |
| MXI1-regulon          | Naive 1 | 0.0857964788295568    | 0.0234259975689206   |
| 173219782             |         | 0.785139828947178     | 0 0 100              |
| 100                   |         |                       |                      |
| MYBL1-regulon         | Naive 1 |                       |                      |
| 0.0247812843291018    |         | -0.00581914293277874  | 110162675            |
| 0.499325786045982     |         | 0.870123290546145     | 0.876294377713139    |
| 82.3040808956302      |         | 79.7479793162307      |                      |
| MYC-regulon           | Naive 1 | 0.270596930300293     | -0.0504409958171291  |
| 41856068.5            |         | 0.189717745185082     | 0 0 100              |
| 100                   |         |                       |                      |
| NFATC1-regulon        | Naive 1 | 0.0373883528332971    | -0.0149546590518981  |
| 85994381.5            |         | 0.389780042451089     |                      |
| 3.49413372250688e-156 |         | 7.40547744173099e-156 | 90.9895269050199     |
| 95.3612129122948      |         |                       |                      |
| NFE2L1-regulon        | Naive 1 | 0.129935794782367     | -0.0600616907434827  |

|                       |                       |                       |                     |
|-----------------------|-----------------------|-----------------------|---------------------|
| 60841546              | 0.275771741932581     | 0                     | 0                   |
| 99.9819429396894      | 99.929715347156       |                       |                     |
| NFE2L2-regulon        | Naive 1               | 0.0990156112873432    | -0.013514295087461  |
| 74474447              | 0.33756453162212      | 0                     | 100 100             |
| NFKB1-regulon         | Naive 1               | 0.0464194858588007    | -0.0116740982596429 |
| 88900754.5            | 0.402953533225236     |                       |                     |
| 1.62984304848687e-121 | 3.00568458292385e-121 |                       | 99.9819429396894    |
| 99.92469501481        |                       |                       |                     |
| NFKB2-regulon         | Naive 1               |                       |                     |
| 0.0709733435073124    | -0.00273733235298666  |                       | 104921509           |
| 0.475569560693361     | 3.61197890635603e-09  |                       |                     |
| 3.91527484505768e-09  | 100                   | 100                   |                     |
| NFYA-regulon          | Naive 1               | 0.0243868905394688    | 0.00391647849848029 |
| 132590534             | 0.6009827975928       | 2.08463559929945e-131 |                     |
| 3.94691006800696e-131 | 99.7472011556519      | 98.9156082132637      |                     |
| NFYB-regulon          | Naive 1               | 0.0937450417396988    | -0.0169483482920082 |
| 54131097.5            | 0.245355814105995     | 0                     | 0 100               |
| 100                   |                       |                       |                     |
| NFYC-regulon          | Naive 1               |                       |                     |
| 0.0755887230109528    | -0.00905061525087129  |                       | 67674957.5          |
| 0.306745014582443     | 0                     | 0                     | 100                 |
| NR1H3-regulon         | Naive 1               | 0.0107835990155287    | 0.00256188029894533 |
| 115469525.5           | 0.523379734421337     |                       |                     |
| 7.45058991103023e-15  | 8.53212715617978e-15  |                       | 25.8757674250632    |
| 21.5798985892866      |                       |                       |                     |
| NR2C2-regulon         | Naive 1               | 0.0254960649075528    | 0.00422562027328195 |
| 123626067             | 0.560350255479437     |                       |                     |
| 8.73687229205504e-49  | 1.25316754088062e-48  |                       | 81.1303719754424    |
| 75.2623123650786      |                       |                       |                     |
| NR3C1-regulon         | Naive 1               | 0.229405266704297     | 0.00447368013098776 |
| 123278708.5           | 0.558775810631831     |                       |                     |
| 9.56189080659947e-46  | 1.33116519072267e-45  |                       | 100 100             |
| NRF1-regulon          | Naive 1               |                       |                     |
| 0.0260322675912731    | -0.000793776303412937 |                       | 108197722           |
| 0.490419396461048     | 0.0206597133629479    |                       | 0.0215711713054309  |
| 99.9277717587577      | 99.972388172097       |                       |                     |
| PAX5-regulon          | Naive 1               | 0.105642143422252     | 0.00612158480326205 |
| 130115970             | 0.589766533877154     |                       |                     |
| 2.99130070930986e-104 | 5.1176469966506e-104  |                       | 100 100             |
| POU2F1-regulon        | Naive 1               | 0.00673911006745123   | 0.00211757232678099 |
| 121218610.5           | 0.549438164707912     |                       |                     |
| 4.85625135897421e-70  | 7.41492142983159e-70  |                       | 26.9772481040087    |
| 17.1469451277675      |                       |                       |                     |
| POU6F1-regulon        | Naive 1               | 0.0383048533989226    | 0.00831789705995796 |
| 125078562             | 0.566933866558261     |                       |                     |
| 2.88134883630719e-61  | 4.30685826058548e-61  |                       | 71.9212712170459    |
| 64.4409859932728      |                       |                       |                     |
| REL-regulon           | Naive 1               | 0.251352511014118     | -0.014077598181879  |
| 68234594.5            | 0.309281637671211     | 0                     | 0 100               |
| 100                   |                       |                       |                     |

|                       |         |                       |                       |
|-----------------------|---------|-----------------------|-----------------------|
| RELA-regulon          | Naive 1 | 0.0971152311856447    | 0.0057528921576134    |
| 140839487.5           |         | 0.63837218733342      | 6.33112951509298e-245 |
| 1.49836731857201e-244 |         | 100                   | 100                   |
| RELB-regulon          | Naive 1 | 0.0949756123100796    | -0.0116271204795729   |
| 60798545              |         | 0.275576834645464     | 0                     |
|                       |         |                       | 100                   |
|                       |         |                       | 100                   |
| REST-regulon          | Naive 1 | 0.220612927761584     | 0.00227171095253151   |
| 118617884.5           |         | 0.537650056310579     |                       |
| 9.53023020231813e-20  |         | 1.11842370969353e-19  | 100                   |
|                       |         |                       | 100                   |
| RFX5-regulon          | Naive 1 | 0.0638986312395765    | -0.00165139031171137  |
| 0.516109469606874     |         | 9.97658653552381e-05  | 113865539             |
| 0.000106516938950705  |         | 100                   | 100                   |
| RXRA-regulon          | Naive 1 | 0.0153582536933928    |                       |
| 0.000943233668151345  |         | 115906090             | 0.525358516364697     |
| 3.61103679953095e-10  |         | 3.94436327333381e-10  | 67.8945467677862      |
| 63.7582207942166      |         |                       |                       |
| SETDB1-regulon        | Naive 1 | 0.0572728029401434    | -0.00278457239828518  |
| 0.469501288361599     |         | 1.74163031980833e-13  | 103582709.5           |
| 1.96278972549828e-13  |         | 91.6215240158902      | 95.5293940458858      |
| SOX5-regulon          | Naive 1 | 0.00994298148782617   | 0.00243712102506362   |
| 115760459.5           |         | 0.524698428327757     |                       |
| 3.33005786249604e-16  |         | 3.84445704450763e-16  | 26.489707475623       |
| 21.9388523520257      |         |                       |                       |
| SP1-regulon           | Naive 1 | 0.0183397988669252    | 0.00608907824296489   |
| 132433277.5           |         | 0.600270013290192     |                       |
| 1.95385722725924e-138 |         | 3.80065378453167e-138 | 71.0906464427591      |
| 58.2559365429991      |         |                       |                       |
| SP2-regulon           | Naive 1 | 0.0280741182478414    | -0.000189120357203816 |
| 0.493948450777835     |         | 0.143817764905092     | 108976312             |
|                       |         |                       | 0.145872304403736     |
|                       |         | 100                   | 100                   |
| SP3-regulon           | Naive 1 | 0.0348153284503518    | 0.00745532776108779   |
| 164853254             |         | 0.747217518417993     | 0                     |
|                       |         |                       | 0                     |
|                       |         |                       | 100                   |
| SP4-regulon           | Naive 1 | 0.0123160437892243    | 0.00418942590725782   |
| 121208224             |         | 0.549391086627457     |                       |
| 4.07929115925914e-50  |         | 5.9108096389265e-50   | 36.7280606717226      |
| 27.9431698378433      |         |                       |                       |
| SPI1-regulon          | Naive 1 | 0.413173482078442     | -0.00611592532095689  |
| 0.421668859458633     |         | 7.73302441454239e-80  | 93029783              |
|                       |         |                       | 1.2200994076278e-79   |
|                       |         | 100                   | 100                   |
| SPIB-regulon          | Naive 1 | 0.536906751711274     | -0.0313735076146372   |
| 43532592              |         | 0.197316792815888     | 0                     |
|                       |         |                       | 0                     |
|                       |         |                       | 100                   |
|                       |         |                       | 100                   |
| SREBF1-regulon        | Naive 1 | 0.04193858647236      | 0.0011489296791837    |
| 113701616             |         | 0.515366468578385     | 0.000205832138753365  |
| 0.000218120624649089  |         | 96.677500902853       | 96.9250464380742      |
| SREBF2-regulon        | Naive 1 | 0.102489438655468     | 0.00399429609392338   |
| 129572876.5           |         | 0.587304896223711     |                       |

|                        |                       |                       |       |
|------------------------|-----------------------|-----------------------|-------|
| 1.02381184259678e-98   | 1.71036801939697e-98  | 100                   | 100   |
| SRF-regulon Naive 1    | 0.0248375341711046    | 0.00463391267491998   |       |
| 133971131              | 0.607240522200865     |                       |       |
| 6.07811824104271e-148  | 1.21562364820854e-147 | 99.0249187432286      |       |
| 97.7835232692404       |                       |                       |       |
| STAT1-regulon Naive 1  | 0.0869391694988802    | 0.00816747412620478   |       |
| 153221200              | 0.694493812254546     | 0                     | 0 100 |
| 100                    |                       |                       |       |
| STAT2-regulon Naive 1  | 0.0774921832513154    | 0.0128228131650225    |       |
| 146000284              | 0.661764128106335     | 0                     | 0 100 |
| 99.957327175059        |                       |                       |       |
| STAT5A-regulon Naive 1 | 0.0624296851688848    | -0.0104540244265462   |       |
| 76730924               | 0.34779228936057      | 6.69477745837647e-296 |       |
| 1.79369509262162e-295  | 100                   | 100                   |       |
| TBP-regulon Naive 1    |                       |                       |       |
| 0.0204181707776482     | -0.000550250885932017 | 110226943.5           |       |
| 0.499617090875685      | 0.921198731390781     | 0.921198731390781     |       |
| 49.6749729144095       | 49.914654350118       |                       |       |
| TCF12-regulon Naive 1  | 0.0123994716799855    | 0.00382225241106188   |       |
| 117742883              | 0.533684005088793     |                       |       |
| 1.46001786750128e-26   | 1.81861874723844e-26  | 30.3358613217768      |       |
| 24.5092625131784       |                       |                       |       |
| TFDP1-regulon Naive 1  | 0.489047995734102     | -0.044552842774014    |       |
| 34993905.5             | 0.158614152848107     | 0                     | 0 100 |
| 100                    |                       |                       |       |
| TFDP2-regulon Naive 1  | 0.028609361289723     | 0.00169280974672033   |       |
| 125866229              | 0.570504063486735     |                       |       |
| 4.92876394458814e-65   | 7.44557957586719e-65  | 100                   |       |
| 99.994979667654        |                       |                       |       |
| TFEC-regulon Naive 1   |                       |                       |       |
| 0.0833258248866372     | -0.00935781247894625  | 87288637.5            |       |
| 0.395646415925995      | 3.43561012826534e-140 |                       |       |
| 6.77578664185664e-140  | 100                   | 100                   |       |
| THAP1-regulon Naive 1  | 0.0381833850263545    | 0.00115982503537684   |       |
| 118736387              | 0.538187183372543     |                       |       |
| 2.86429583771624e-20   | 3.4178992349219e-20   | 100                   | 100   |
| THAP11-regulon Naive 1 |                       |                       |       |
| 0.176174197804569      | -0.00262373027570073  | 93304832              |       |
| 0.422915552661446      | 2.23876842367627e-77  |                       |       |
| 3.49346281496737e-77   | 100                   | 100                   |       |
| TP53-regulon Naive 1   | 0.0839797873624619    | -0.0163754815157924   |       |
| 60445998.5             | 0.273978874553897     | 0                     | 0 100 |
| 100                    |                       |                       |       |
| USF2-regulon Naive 1   | 0.132136105431948     | 0.00780212553416056   |       |
| 144925527.5            | 0.656892662937479     | 0                     | 0 100 |
| 100                    |                       |                       |       |
| XBP1-regulon Naive 1   |                       |                       |       |
| 0.194389562042917      | -0.00102545863799194  | 127981479.5           |       |
| 0.580091694856404      | 2.21384658536177e-83  |                       |       |
| 3.61340477151001e-83   | 100                   | 100                   |       |

|                       |                      |                       |                      |                     |
|-----------------------|----------------------|-----------------------|----------------------|---------------------|
| YBX1-regulon          | Naive 1              |                       |                      |                     |
| 0.0908695779973771    |                      | -0.00491391166300309  |                      | 81252018.5          |
| 0.368284702648471     |                      | 3.99402478873459e-222 |                      |                     |
| 9.14760516129535e-222 |                      | 100                   | 100                  |                     |
| YY1-regulon           | Naive 1              | 0.59927370717949      | -0.045785617586778   |                     |
| 35253959              | 0.159792877114756    | 0                     | 0                    | 100 100             |
| YY2-regulon           | Naive 1              | 0.0774843771438548    |                      | 0.0301637070256276  |
|                       | 164104112.5          | 0.743821943025991     |                      | 0 0                 |
| 99.1513181654027      | 89.3317937647472     |                       |                      |                     |
| ZBTB33-regulon        | Naive 1              |                       |                      |                     |
| 0.363108948570616     |                      | -0.00309477257619711  |                      | 99794221.5          |
| 0.452329503557664     |                      | 1.11415998333977e-30  |                      |                     |
| 1.47860483770325e-30  |                      | 100                   | 100                  |                     |
| ZNF143-regulon        | Naive 1              | 0.0279620259769666    |                      | 0.00527509968887765 |
|                       | 149469414            | 0.677488383750506     |                      | 0 0 100             |
|                       | 99.992469501481      |                       |                      |                     |
| ZNF274-regulon        | Naive 1              | 0.0745978069296128    |                      | 0.0105430188916002  |
|                       | 151866756            | 0.688354629314814     |                      | 0 0 100             |
|                       | 100                  |                       |                      |                     |
| ZNF76-regulon         | Naive 1              | 0.0171588932608143    |                      | 0.0029634687795554  |
|                       | 134150746.5          | 0.608054651403188     |                      |                     |
| 3.64015012827504e-150 |                      | 7.4913234523921e-150  |                      | 99.7110870350307    |
| 99.4251719463828      |                      |                       |                      |                     |
| ATF1-regulon          | Naive 2              |                       |                      |                     |
| 0.103720419761196     |                      | -0.00301977486447313  |                      | 134129971.5         |
| 0.461349047087692     |                      | 8.45304579141804e-27  |                      |                     |
| 1.25034635664725e-26  |                      | 100                   | 100                  |                     |
| ATF3-regulon          | Naive 2              |                       |                      |                     |
| 0.0469071697560528    |                      | -0.00495829510331563  |                      | 126897038.5         |
| 0.436470888165552     |                      | 1.87509820215598e-69  |                      |                     |
| 4.51294821535846e-69  |                      | 100                   | 100                  |                     |
| ATF4-regulon          | Naive 2              |                       |                      |                     |
| 0.106893656967002     |                      | -0.00223895771692879  |                      | 145690737.5         |
| 0.501113078333339     |                      | 0.757598802803502     |                      | 0.762971843958136   |
|                       | 100 100              |                       |                      |                     |
| ATF5-regulon          | Naive 2              |                       |                      |                     |
| 0.114005683445814     |                      | -0.00533565134139753  |                      | 132948950.5         |
| 0.4572868460237       | 2.32359120211151e-32 | 3.70730281685208e-32  |                      | 100                 |
|                       | 99.9973443101846     |                       |                      |                     |
| ATF6-regulon          | Naive 2              | 0.13080361948783      | -0.00676069988154043 |                     |
| 134287494.5           | 0.46189085802772     | 4.24025379611435e-26  |                      |                     |
| 6.14404121477794e-26  |                      | 100                   | 100                  |                     |
| ATF6B-regulon         | Naive 2              | 0.058965355797645     |                      | 0.00201103393187438 |
|                       | 167738692.273438     | 0.576948499836861     |                      |                     |
| 5.0417947935419e-101  |                      | 1.46109155241418e-100 |                      | 100                 |
| 99.9043951666445      |                      |                       |                      |                     |
| BACH1-regulon         | Naive 2              | 0.043329962450787     |                      |                     |
| 5.67896557510661e-05  |                      | 146751929.5           | 0.504763119502379    |                     |
| 0.186593287277441     |                      | 0.196268494765901     |                      | 99.9740966196089    |
| 99.4794847961758      |                      |                       |                      |                     |

|                       |         |                       |                   |                     |
|-----------------------|---------|-----------------------|-------------------|---------------------|
| BATF-regulon          | Naive 2 |                       |                   |                     |
| 0.0122704387114778    |         | -0.00846293380821503  |                   | 126151954           |
| 0.433908119977125     |         | 2.71719663413585e-84  |                   |                     |
| 7.28003626504323e-84  |         | 43.9062297629841      | 53.3182844243792  |                     |
| BATF3-regulon         | Naive 2 |                       |                   |                     |
| 119595212.5           |         | 0.0718771948485954    |                   | -0.013600653243612  |
| 2.09795119607805e-133 |         | 0.411355767142059     |                   |                     |
| BCL11A-regulon        | Naive 2 |                       |                   |                     |
| 196708398.5           |         | 7.26607487422153e-133 | 100               | 100                 |
| 100                   |         | 0.217521276288572     |                   | 0.0156908347169611  |
| BHLHE40-regulon       | Naive 2 |                       |                   |                     |
| 153164027             |         | 0.676591750428583     | 0                 | 0                   |
| 1.03683548428993e-13  |         | 0.0570073552639765    |                   | 0.00163425770712054 |
| BRF2-regulon          | Naive 2 |                       |                   |                     |
| 0.0408113581965403    |         | 0.526817959583056     |                   |                     |
| 0.485997828154099     |         | 1.31455927472474e-13  | 100               | 100                 |
| 0.000122321105442888  |         | -0.000965214115899532 |                   | 141296216.5         |
| CEBPB-regulon         | Naive 2 |                       |                   |                     |
| 143887280.5           |         | 0.000103369948261595  |                   |                     |
| 0.168836016419394     |         | 99.8445797176532      | 99.7052184304873  |                     |
| CEBPG-regulon         | Naive 2 |                       |                   |                     |
| 0.0605459218634649    |         | 0.140674244103109     |                   | -0.0029135321103049 |
| 0.418933910969659     |         | 0.494909966835521     |                   | 0.158135142139292   |
| 2.01022858087726e-111 |         | 100                   | 100               |                     |
| CLOCK-regulon         | Naive 2 |                       |                   |                     |
| 8.03419331804472e-05  |         | -0.00905569257121433  |                   | 121798438.5         |
| 0.166243383492385     |         | 6.79513886493721e-112 |                   |                     |
| 50.9201965210463      |         | 100                   | 100               |                     |
| CREB1-regulon         | Naive 2 |                       |                   |                     |
| 164073174             |         | 0.0156613984524288    |                   |                     |
| 3.42711990386211e-71  |         | 146731129             | 0.504691574785365 |                     |
| 99.9920329305537      |         | 0.176168361611333     |                   | 51.9362776842378    |
| CREB3-regulon         | Naive 2 |                       |                   |                     |
| 0.233373661506881     |         | 0.0457501433941445    |                   | 0.00334875845303644 |
| 0.448032939909334     |         | 0.564340703506025     |                   |                     |
| 8.20961181893568e-47  |         | 8.39053493704172e-71  | 100               |                     |
| CREB3L2-regulon       | Naive 2 |                       |                   |                     |
| 0.123835908209614     |         | -0.00774404857099528  |                   | 130258523           |
| 1.48604471423969e-21  |         | 4.50950508364073e-47  |                   |                     |
| CREB3L4-regulon       | Naive 2 |                       |                   |                     |
| 154658603.5           |         | 100                   | 100               |                     |
| 6.78353484005333e-27  |         | 0.00354439478612216   |                   | 155399492           |
| CREB5-regulon         | Naive 2 |                       |                   |                     |
| 0.035344756791143     |         | 1.08837077662625e-21  |                   |                     |
| 0.470873602424317     |         | 100                   | 100               |                     |
| 8.62465236319608e-16  |         | 0.013612133761585     |                   | 0.00302561594350836 |
| CREM-regulon          | Naive 2 |                       |                   |                     |
| 0.147441492588279     |         | 0.531958655852232     |                   | 4.5382803507399e-27 |
| 0.437273045104369     |         | 35.9668436730993      | 30.3996813172222  |                     |
|                       |         | -0.00461479034470321  |                   | 136899086           |
|                       |         | 6.6810687320533e-16   |                   |                     |
|                       |         | 99.8057246470664      | 99.585712388793   |                     |
|                       |         | -0.00308258604844766  |                   | 127130253           |
|                       |         | 9.31896573533807e-68  |                   |                     |



|                       |                       |                      |                     |
|-----------------------|-----------------------|----------------------|---------------------|
| 2.16933300724263e-67  | 100                   | 100                  |                     |
| CTCF-regulon Naive 2  |                       |                      |                     |
| 0.368959164263314     | -0.00226679652735329  |                      | 146178039           |
| 0.502789184576823     | 0.439292374531925     |                      | 0.458672920467157   |
| 100 100               |                       |                      |                     |
| CUX1-regulon Naive 2  |                       |                      |                     |
| 0.0754837631925271    | -0.00146328992523855  |                      | 147364525.5         |
| 0.506870184595207     | 0.0567834039789187    |                      | 0.0615514760687516  |
| 100 100               |                       |                      |                     |
| DDIT3-regulon Naive 2 | 0.086994736432066     |                      | 0.00251445969311143 |
| 159923554.5           | 0.55006780848717      | 8.04512846829415e-44 |                     |
| 1.41038054629354e-43  | 100                   | 100                  |                     |
| E2F1-regulon Naive 2  | 0.419827668164519     |                      | -0.0215308674009209 |
| 116270686             | 0.399920834921912     |                      |                     |
| 1.73780165466659e-169 | 7.47781318068653e-169 | 100                  | 100                 |
| E2F2-regulon Naive 2  |                       |                      |                     |
| 0.0516545010868104    | -0.00273122521472591  |                      | 141831838.5         |
| 0.487840136003238     | 0.000747045742759246  |                      |                     |
| 0.000855487866708169  | 100                   | 100                  |                     |
| E2F3-regulon Naive 2  | 0.0224790631393359    |                      | 0.00164339421968682 |
| 163633549.5           | 0.56282858550672      | 5.69675793177348e-68 |                     |
| 1.34823271051972e-67  | 100                   | 100                  |                     |
| E2F4-regulon Naive 2  | 0.382550184012292     |                      | -0.0194100798373943 |
| 119791827.5           | 0.412032037642073     |                      |                     |
| 2.08529590607442e-131 | 7.05028615863255e-131 | 100                  | 100                 |
| E2F6-regulon Naive 2  | 0.0619574974259661    |                      | -0.012585163363678  |
| 119145231             | 0.409808025545528     |                      |                     |
| 4.93350581823523e-138 | 1.79630211843437e-137 | 100                  | 100                 |
| E2F7-regulon Naive 2  | 0.0317955215877111    |                      | 0.00147195664133161 |
| 162100858             | 0.557556790134689     |                      |                     |
| 2.44955475986103e-57  | 5.04111269420675e-57  | 100                  | 100                 |
| E2F8-regulon Naive 2  |                       |                      |                     |
| 0.0691021116734863    | -0.00686213232534184  |                      | 119158405           |
| 0.409853338403485     | 6.75774620964786e-138 |                      |                     |
| 2.39899990442499e-137 | 100                   | 100                  |                     |
| EGR1-regulon Naive 2  | 0.0489318712830744    |                      | 0.00177004737648825 |
| 162840040             | 0.560099256277868     |                      | 2.3782645771809e-62 |
| 5.36053285650298e-62  | 100                   | 100                  |                     |
| EGR2-regulon Naive 2  | 0.0477948596127311    |                      | 0.00210515585133435 |
| 161671251             | 0.556079127999554     |                      |                     |
| 1.59846616796075e-54  | 3.15253049792259e-54  | 100                  |                     |
| 99.9946886203691      |                       |                      |                     |
| EGR3-regulon Naive 2  | 0.0437438201785657    |                      | 0.00273868025852006 |
| 166751178.5           | 0.573551879877382     |                      |                     |
| 1.86839587782614e-92  | 5.20220028728063e-92  | 100                  |                     |
| 99.9946886203691      |                       |                      |                     |
| ELF1-regulon Naive 2  | 0.706165187440606     |                      | -0.0010597807473488 |
| 158322128.5           | 0.544559596185183     |                      |                     |
| 4.54638841461433e-35  | 7.33621766903676e-35  | 100                  | 100                 |
| ELF2-regulon Naive 2  | 0.0370072416108785    |                      | 0.00524337073265197 |

|                       |                       |                      |     |
|-----------------------|-----------------------|----------------------|-----|
| 174591362.5           | 0.600518719405802     |                      |     |
| 5.83422406683674e-171 | 2.5889369296588e-170  | 99.9870483098044     |     |
| 99.4423051387598      |                       |                      |     |
| ELF4-regulon Naive 2  | 0.0196351628382664    | 0.00143166786441255  |     |
| 159045512.5           | 0.54704772404614      | 6.74201717612985e-39 |     |
| 1.1397219512029e-38   | 99.0545266157233      | 98.188819545877      |     |
| ELK1-regulon Naive 2  | 0.0660828377610898    | 3.3580329156721e-05  |     |
| 144876397             | 0.498312099480675     | 0.63976808587306     |     |
| 0.653576030172478     | 100                   | 100                  |     |
| ELK3-regulon Naive 2  | 0.0666631441903325    | 0.00211809467556849  |     |
| 155242473.5           | 0.533966915938406     | 4.5803227306163e-21  |     |
| 6.13590403535391e-21  | 100                   | 100                  |     |
| ELK4-regulon Naive 2  |                       |                      |     |
| 0.0444250554091248    | -0.000689259621217339 | 144819698.5          |     |
| 0.498117081181232     | 0.601595704874556     | 0.619033261537587    |     |
| 97.3319518197125      | 96.606028415881       |                      |     |
| ESRRA-regulon Naive 2 | 0.081454390094295     | -0.0123894801331825  |     |
| 112638476.5           | 0.387427606354814     |                      |     |
| 6.82921261015043e-214 | 4.4079463210971e-213  | 100                  | 100 |
| ETS1-regulon Naive 2  | 0.243545441367119     |                      |     |
| 0.000730782613994452  | 157127399             | 0.540450243814579    |     |
| 3.39924651102975e-29  | 5.24666309311113e-29  | 100                  | 100 |
| ETV2-regulon Naive 2  | 0.030928141825087     | 0.00280307641154799  |     |
| 169896216             | 0.584369447624945     |                      |     |
| 4.90918080947135e-121 | 1.5491192776554e-120  | 100                  | 100 |
| ETV3-regulon Naive 2  | 0.0124678827564206    | 0.00125183437043077  |     |
| 156300038             | 0.53760448007752      | 1.51116812640771e-25 |     |
| 2.16753408030197e-25  | 86.8281310711048      | 83.8401274731111     |     |
| ETV5-regulon Naive 2  | 0.0340154424617778    |                      |     |
| 0.000664944615026516  | 153527724             | 0.52806891984572     |     |
| 7.08297894039355e-15  | 9.06110819401698e-15  | 100                  | 100 |
| ETV6-regulon Naive 2  | 0.471916799009759     | 0.0148725596156444   |     |
| 188926749             | 0.649826244244938     | 0                    | 0   |
| 100                   |                       |                      | 100 |
| ETV7-regulon Naive 2  |                       |                      |     |
| 0.0632592730567659    | -0.000984289162925242 | 148832751.5          |     |
| 0.511920246549551     | 0.000948873375558587  | 0.00107792015463455  |     |
| 100                   | 100                   |                      |     |
| FLI1-regulon Naive 2  | 0.155468688462096     | 0.0139028218460203   |     |
| 188316601.5           | 0.647727600932336     | 0                    | 0   |
| 100                   |                       |                      | 100 |
| FOS-regulon Naive 2   | 0.0900700877034922    | 0.0045702122455107   |     |
| 177603105.5           | 0.610877811766625     |                      |     |
| 1.45453125469705e-207 | 8.26173752667927e-207 | 100                  | 100 |
| FOSB-regulon Naive 2  | 0.0438871744631174    | 0.00290861009432487  |     |
| 160432911.5           | 0.55181977610447      | 8.13843427232374e-47 |     |
| 1.46285780591136e-46  | 99.909338168631       | 99.2032930553711     |     |
| FOSL1-regulon Naive 2 | 0.0522992438953064    | -0.0102362167386924  |     |
| 120767122             | 0.415386628589741     |                      |     |
| 1.00370255645644e-121 | 3.23922188674577e-121 | 100                  | 100 |

|                       |         |                       |                     |
|-----------------------|---------|-----------------------|---------------------|
| FOX01-regulon         | Naive 2 | 0.0204876308338786    | 0.00456790176979148 |
| 162264038             |         | 0.558118058706223     |                     |
| 2.70063024672882e-65  |         | 6.18531443605634e-65  | 59.8756637741225    |
| 50.7980347895366      |         |                       |                     |
| FOX03-regulon         | Naive 2 | 0.0227318636252183    | 0.00360061776387648 |
| 159484956             |         | 0.548559219483786     |                     |
| 2.34944123463478e-48  |         | 4.38974546471234e-48  | 54.5395674135475    |
| 45.1653166910105      |         |                       |                     |
| GABPA-regulon         | Naive 2 | 0.0268982126610997    | 0.00169945881998928 |
| 162510515             |         | 0.558965832904692     |                     |
| 4.34036298158848e-60  |         | 9.33835671796309e-60  | 100 100             |
| GTF2B-regulon         | Naive 2 | 0.0753309003994177    | 128075938           |
| 0.440525792187783     |         | -0.00449009731230737  |                     |
| 9.28838007727092e-61  |         | 4.25172327480711e-61  |                     |
| HINFP-regulon         | Naive 2 | 0.0172095407962896    | 0.00117973345773619 |
| 149238141             |         | 0.513314610966637     |                     |
| 0.000152352372424764  |         | 0.000178793693258814  | 63.4114751975133    |
| 63.1974505377772      |         |                       |                     |
| HIVEP3-regulon        | Naive 2 | 0.0811796257417061    | 0.00420760820462743 |
| 158627433.5           |         | 0.545609713241393     |                     |
| 1.16631222441287e-36  |         | 1.92577134728637e-36  | 99.909338168631     |
| 99.6494489443633      |         |                       |                     |
| HOXB2-regulon         | Naive 2 | 0.040942886255577     | 0.00462757080631503 |
| 162166522.5           |         | 0.557782647593418     | 5.1332159123778e-58 |
| 1.07193626405536e-57  |         | 89.2371454474809      | 82.5999203293055    |
| IKZF1-regulon         | Naive 2 | 0.144891727188101     | 0.00123829799490008 |
| 151837372.5           |         | 0.522254842312957     | 6.7921792500959e-10 |
| 8.46043380275104e-10  |         | 100 100               |                     |
| IRF1-regulon          | Naive 2 | 0.140672992475455     | 0.0063030507541352  |
| 182683614.5           |         | 0.628352563752764     |                     |
| 2.01575738499684e-277 |         | 2.38531290557959e-276 | 100 100             |
| IRF2-regulon          | Naive 2 | 0.0898018268270522    | 0.00576181254029308 |
| 172762907.5           |         | 0.594229625607756     |                     |
| 1.74709082325419e-150 |         | 7.08819705434557e-150 | 100 100             |
| IRF3-regulon          | Naive 2 | 0.149504761866843     | 0.00489035673729007 |
| 178008666             |         | 0.612272764349698     |                     |
| 9.12632098126681e-213 |         | 5.63451121452125e-212 | 100 100             |
| IRF4-regulon          | Naive 2 | 0.0551735136207373    | -0.0039029462859982 |
| 134180696             |         | 0.461523517412835     |                     |
| 1.42430345182199e-26  |         | 2.08506278514147e-26  | 100                 |
| 99.9946886203691      |         |                       |                     |
| IRF5-regulon          | Naive 2 | 0.0535044391439135    | 0.00778421368362221 |
| 165164684             |         | 0.568095025472661     |                     |
| 4.24180242261243e-80  |         | 1.09515626183812e-79  | 90.0531019298018    |
| 78.5154693931749      |         |                       |                     |
| IRF7-regulon          | Naive 2 | 0.112440462969942     | 0.00555016113661727 |
| 179256615.5           |         | 0.616565170485329     |                     |
| 3.50552383906211e-229 |         | 2.37040183403247e-228 | 100 100             |
| IRF8-regulon          | Naive 2 | 0.082112653755049     |                     |

|                       |                       |                       |             |
|-----------------------|-----------------------|-----------------------|-------------|
| 0.000409389167369892  | 155499162.5           | 0.53484981499686      |             |
| 4.32119361009675e-22  | 5.95737371489066e-22  | 100                   | 100         |
| IRF9-regulon Naive 2  | 0.0369984459968633    | 0.00371422216017368   |             |
| 174922236             | 0.601656781035314     |                       |             |
| 8.31220155063289e-175 | 3.80752458125765e-174 | 100                   | 100         |
| JUN-regulon Naive 2   | 0.0946104115950572    | 0.00748348904087875   |             |
| 181232823.5           | 0.623362470652108     |                       |             |
| 1.96052289782761e-256 | 1.73996407182201e-255 | 100                   | 100         |
| JUNB-regulon Naive 2  | 0.169659892614883     | 0.0119027217229819    |             |
| 191107759.5           | 0.657327976367972     | 0                     | 0 100       |
| 100                   |                       |                       |             |
| JUND-regulon Naive 2  | 0.0435860797480566    | 0.00617994729386931   |             |
| 190962695             | 0.656829017275587     | 0                     | 0 100       |
| 100                   |                       |                       |             |
| KLF11-regulon Naive 2 | 0.0234255679221186    | 0.00179440968561947   |             |
| 152014633             | 0.522864541710092     |                       |             |
| 1.08852960654502e-12  | 1.36788676220701e-12  | 45.1107369511721      |             |
| 39.9867215509229      |                       |                       |             |
| KLF12-regulon Naive 2 | 0.0492081463697743    | 0.00260111732007424   |             |
| 156076197.5           | 0.536834565641396     |                       |             |
| 1.72426482727674e-24  | 2.44845605473297e-24  | 99.4689807019816      |             |
| 98.4251759394503      |                       |                       |             |
| KLF13-regulon Naive 2 | 0.0670147018529606    | 0.00087076983631755   |             |
| 167328016.5           | 0.575535952927184     |                       |             |
| 2.09631436980837e-97  | 5.95353281025576e-97  | 100                   | 100         |
| KLF2-regulon Naive 2  | 0.117313261742195     | 0.0102005858473289    |             |
| 182143409.5           | 0.626494492367265     |                       |             |
| 1.6459575970787e-269  | 1.55817319190117e-268 | 100                   | 100         |
| KLF3-regulon Naive 2  | 0.0858493533869234    | 0.0166538971458312    |             |
| 193426239.5           | 0.665302544070701     | 0                     | 0 100       |
| 99.8353472314434      |                       |                       |             |
| KLF4-regulon Naive 2  | 0.0154579100487158    | -0.000532487536004168 | 143416547.5 |
| 0.493290849060769     | 0.0465498220736236    | 0.0508467287265734    |             |
| 48.5688382333895      | 50.0677200902935      |                       |             |
| KLF6-regulon Naive 2  | 0.0735220815293188    | 0.00499154623567749   |             |
| 161820597.5           | 0.55659281531858      | 1.71190739871143e-55  |             |
| 3.42381479742287e-55  | 100                   | 100                   |             |
| KLF7-regulon Naive 2  | 0.0540366845459538    | 0.00968609387858452   |             |
| 179323772             | 0.616796159778283     |                       |             |
| 4.37115455802107e-230 | 3.10351973619496e-229 | 99.6503043647196      |             |
| 97.1265436197052      |                       |                       |             |
| KLF8-regulon Naive 2  | 0.0320692230677985    | 0.00839013070194468   |             |
| 179216952             | 0.616428745212703     |                       |             |
| 3.26073048067559e-231 | 2.4369669908207e-230  | 89.3407589690455      |             |
| 75.2356924711194      |                       |                       |             |
| MAFB-regulon Naive 2  | 0.0576349617537632    | 0.00223181277661038   |             |
| 159594814.5           | 0.548937085174225     |                       |             |
| 6.08591068665848e-42  | 1.04120399699458e-41  | 100                   |             |
| 99.9973443101846      |                       |                       |             |

|                       |         |                       |                       |
|-----------------------|---------|-----------------------|-----------------------|
| MAFF-regulon          | Naive 2 | 0.0164347232987904    | 0.00487776335814122   |
| 158674949             |         | 0.545773145995473     | 4.239150443594e-57    |
| 8.59941947129069e-57  |         | 35.5005828260588      | 27.1199043951666      |
| MAFG-regulon          | Naive 2 |                       |                       |
| 0.0240803434458146    |         | -0.00159910690124104  | 141947943             |
| 0.488239485230249     |         | 0.000716463586958764  |                       |
| 0.000827136823968654  |         | 57.6997798212667      | 58.7863497543487      |
| MAX-regulon           | Naive 2 | 0.202980406054011     | 0.00639902954483396   |
| 182178637             |         | 0.626615659719905     |                       |
| 5.05798172520678e-270 |         | 5.13023860699545e-269 | 100 100               |
| MAZ-regulon           | Naive 2 |                       |                       |
| 0.133462889411605     |         | -0.00342344320848351  | 134796248             |
| 0.463640749866231     |         | 6.65334621199506e-24  |                       |
| 9.35420952577523e-24  |         | 100 100               |                       |
| MEF2A-regulon         | Naive 2 | 0.0441211423416171    | 0.00405718086758732   |
| 169132187.5           |         | 0.581741520275965     |                       |
| 9.83323572080058e-114 |         | 2.97089249436954e-113 | 100                   |
| 99.9973443101846      |         |                       |                       |
| MLX-regulon           | Naive 2 |                       |                       |
| 0.0515410663064074    |         | -0.00166825514613594  | 139752500             |
| 0.480688111553969     |         | 8.56375892147751e-08  |                       |
| 1.05743805813027e-07  |         | 100 99.9867215509229  |                       |
| MXD4-regulon          | Naive 2 | 0.0649035206340803    | -0.0328563077862643   |
| 125258704.5           |         | 0.430835728318288     |                       |
| 4.30213193743368e-82  |         | 1.13130136132515e-81  | 86.128739800544       |
| 89.1116717567388      |         |                       |                       |
| MXI1-regulon          | Naive 2 | 0.0748649478045778    | 0.0116110938616708    |
| 190667403             |         | 0.655813340605496     | 0 0 100               |
| 100                   |         |                       |                       |
| MYBL1-regulon         | Naive 2 |                       |                       |
| 0.0217929192944696    |         | -0.00975761699555188  | 133458273.5           |
| 0.459038696695716     |         | 4.0347123844671e-30   |                       |
| 6.30805108019565e-30  |         | 80.4688511850796      | 79.9760987916611      |
| MYC-regulon           | Naive 2 | 0.296047276450633     | -0.0226964144056556   |
| 130243621.5           |         | 0.447981685199083     |                       |
| 3.67048065543062e-47  |         | 6.76893835157335e-47  | 100 100               |
| NFATC1-regulon        | Naive 2 |                       |                       |
| 0.0423661891108812    |         | -0.00982311534664348  | 129632725.5           |
| 0.445880467370451     |         | 6.56894677747454e-51  |                       |
| 1.24372058986851e-50  |         | 94.5602901178604      | 94.8824857256672      |
| NFE2L1-regulon        | Naive 2 | 0.15520597074449      | -0.0330919700273945   |
| 118011593.5           |         | 0.405908803212748     | 4.76632782919054e-150 |
| 1.88005153262516e-149 |         | 99.9870483098044      | 99.925640685168       |
| NFE2L2-regulon        | Naive 2 |                       |                       |
| 0.107685524362912     |         | -0.00385012646334537  | 142926187             |
| 0.491604221181298     |         | 0.019912456291405     | 0.0220903811982774    |
| 100 100               |         |                       |                       |
| NFKB1-regulon         | Naive 2 |                       |                       |
| 0.0502262103106653    |         | -0.00776361167812641  | 132166741.5           |
| 0.454596385623703     |         | 2.40950970908554e-36  |                       |

|                        |                       |                       |  |
|------------------------|-----------------------|-----------------------|--|
| 3.93276297344996e-36   | 99.9740966196089      | 99.9229849953525      |  |
| NFKB2-regulon Naive 2  |                       |                       |  |
| 0.0702947639260835     | -0.00371374514290607  | 133410957             |  |
| 0.458875948415504      | 4.04248343871693e-30  |                       |  |
| 6.30805108019565e-30   | 100 100               |                       |  |
| NFYA-regulon Naive 2   | 0.021841998671934     | 0.00107681999843847   |  |
| 155355862.5            | 0.534356925020755     |                       |  |
| 1.62608112673379e-21   | 2.19908114282094e-21  | 99.6762077451107      |  |
| 98.8819545877042       |                       |                       |  |
| NFYB-regulon Naive 2   | 0.0994389162886248    | -0.0110695272267946   |  |
| 108452282              | 0.373028909166551     |                       |  |
| 1.57748567291831e-271  | 1.72309973503385e-270 | 100 100               |  |
| NFYC-regulon Naive 2   |                       |                       |  |
| 0.0806741316813329     | -0.00344716256903579  | 130966255             |  |
| 0.450467231664876      | 6.30744106466066e-43  |                       |  |
| 1.09226418436806e-42   | 100 100               |                       |  |
| NR1H3-regulon Naive 2  | 0.010570361609291     | 0.00245344115798548   |  |
| 152462462.5            | 0.524404881358064     |                       |  |
| 1.17921126564742e-20   | 1.55044444186976e-20  | 25.8515736303588      |  |
| 21.3358119771611       |                       |                       |  |
| NR2C2-regulon Naive 2  | 0.0232606531858727    | 0.00177682162167171   |  |
| 154563894              | 0.531632896164919     |                       |  |
| 1.02228552982361e-18   | 1.33178481866929e-18  | 79.7694599145188      |  |
| 75.2011685035188       |                       |                       |  |
| NR3C1-regulon Naive 2  | 0.230787921903469     | 0.00639919881492265   |  |
| 172381109              | 0.592916404019884     |                       |  |
| 2.24658219188475e-146  | 8.62201814182797e-146 | 100 100               |  |
| NRF1-regulon Naive 2   |                       |                       |  |
| 0.0261684297943912     | -0.000675712767140558 | 144613284.5           |  |
| 0.497407106362475      | 0.47216501240003      | 0.489397312122658     |  |
| 99.9611449294133       | 99.9681317222148      |                       |  |
| PAX5-regulon Naive 2   | 0.1061628368661       | 0.00710393523039279   |  |
| 176287986              | 0.606354369903884     | 3.85708556985707e-191 |  |
| 1.9560933961418e-190   | 100 100               |                       |  |
| POU2F1-regulon Naive 2 | 0.00507733604635108   |                       |  |
| 0.000237822025570598   | 148843951             | 0.511958767982122     |  |
| 8.9846509476983e-07    | 1.09044481587449e-06  | 20.2305400854812      |  |
| 17.9604302217501       |                       |                       |  |
| POU6F1-regulon Naive 2 | 0.0313450670716712    |                       |  |
| 0.000413255044197213   | 149178482             | 0.513109409828574     |  |
| 0.000204797714194798   | 0.000238371109964437  | 67.4783059189224      |  |
| 64.9183375381755       |                       |                       |  |
| REL-regulon Naive 2    |                       |                       |  |
| 0.261550452254701      | -0.00260474238844849  | 142375243             |  |
| 0.489709212283912      | 0.00432481235863122   | 0.00487399488036217   |  |
| 100 100                |                       |                       |  |
| RELA-regulon Naive 2   | 0.0948918628116588    | 0.00340714790697165   |  |
| 170313800.5            | 0.585805757563724     |                       |  |
| 4.00827964286268e-125  | 1.32366444020116e-124 | 100 100               |  |
| RELB-regulon Naive 2   | 0.10021632977293      | -0.00598588315153176  |  |

|                       |                       |                       |                     |
|-----------------------|-----------------------|-----------------------|---------------------|
| 113839576.5           | 0.391558870488103     | 1.24317857654401e-198 |                     |
| 6.5381984396018e-198  | 100                   | 100                   |                     |
| REST-regulon          | Naive 2               | 0.225131562291883     | 0.00784857207207001 |
| 193207994.5           | 0.664551875732703     | 0                     | 0 100               |
| 100                   |                       |                       |                     |
| RFX5-regulon          | Naive 2               |                       |                     |
| 0.0637968641570769    | -0.00186976152897249  | 150096166             |                     |
| 0.516265845591535     | 6.47613423311576e-06  | 7.7933140771393e-06   |                     |
| 100                   | 100                   |                       |                     |
| RXRA-regulon          | Naive 2               | 0.0134087367347309    | -0.0013513408217881 |
| 141331065             | 0.486117691910779     |                       |                     |
| 8.13881540656305e-05  | 9.71186376245338e-05  | 63.7093640720114      |                     |
| 64.3765768158279      |                       |                       |                     |
| SETDB1-regulon        | Naive 2               | 0.0623584485443716    | 0.00318243154254615 |
| 155539217             | 0.534987585140251     |                       |                     |
| 2.95618646537695e-22  | 4.11547527532869e-22  | 95.4410050511592      |                     |
| 94.9727791793918      |                       |                       |                     |
| SOX5-regulon          | Naive 2               | 0.00832043103480123   |                     |
| 0.000623162343381356  | 146823168.5           | 0.505008150828323     |                     |
| 0.057486962550783     | 0.0618420354712969    | 23.1576220696801      |                     |
| 22.3582525561014      |                       |                       |                     |
| SP1-regulon           | Naive 2               | 0.015315250728299     | 0.00279736562753777 |
| 160679583             | 0.552668219298754     |                       |                     |
| 1.57436187463167e-51  | 3.02107278645538e-51  | 66.0665716876052      |                     |
| 58.5420262913292      |                       |                       |                     |
| SP2-regulon           | Naive 2               |                       |                     |
| 0.0277133449170487    | -0.000634832756561864 | 139836664             |                     |
| 0.480977599285643     | 1.33075860073946e-07  |                       |                     |
| 1.62903208021555e-07  | 100                   | 100                   |                     |
| SP3-regulon           | Naive 2               | 0.0307291306752935    | 0.00296348525043611 |
| 175636874             | 0.604114826441762     |                       |                     |
| 2.91689818393762e-183 | 1.42827428316946e-182 | 100                   | 100                 |
| SP4-regulon           | Naive 2               | 0.0106411998693472    | 0.0024140388151638  |
| 154589894             | 0.531722324911456     |                       |                     |
| 5.03315435916113e-28  | 7.60327573405191e-28  | 33.7262012692656      |                     |
| 28.049395830567       |                       |                       |                     |
| SPI1-regulon          | Naive 2               | 0.425128113790775     | 0.00793539066903631 |
| 164388093             | 0.56542388856105      | 1.51719675629859e-73  |                     |
| 3.77968314727018e-73  | 100                   | 100                   |                     |
| SPIB-regulon          | Naive 2               |                       |                     |
| 0.556267625719468     | -0.00986160609098696  | 113826122.5           |                     |
| 0.391512594551337     | 8.44796138866131e-199 |                       |                     |
| 4.61388660457656e-198 | 100                   | 100                   |                     |
| SREBF1-regulon        | Naive 2               |                       |                     |
| 0.0407759231875681    | -0.000185525126846296 | 145723655             |                     |
| 0.501226300285806     | 0.733830146599973     | 0.744313434408544     |                     |
| 97.0340629452143      | 96.8662860177931      |                       |                     |
| SREBF2-regulon        | Naive 2               | 0.104564882316525     | 0.00672686494101357 |
| 189918633.5           | 0.653237897612031     | 0                     | 0 100               |
| 100                   |                       |                       |                     |

|                       |         |                       |                       |
|-----------------------|---------|-----------------------|-----------------------|
| SRF-regulon           | Naive 2 | 0.0231686667508819    | 0.00289149608507328   |
| 166314093.5           |         | 0.572048496658916     |                       |
| 8.59253422799264e-89  |         | 2.34642280841337e-88  | 99.0027198549411      |
| 97.7161067587306      |         |                       |                       |
| STAT1-regulon         | Naive 2 | 0.0834923897378786    | 0.00448744538054802   |
| 177628807             |         | 0.61096621380236      | 6.83841445900181e-208 |
| 4.04606188824274e-207 |         | 100                   | 100                   |
| STAT2-regulon         | Naive 2 | 0.0739738131030225    | 0.00932640199227804   |
| 180951321.5           |         | 0.622394225613353     |                       |
| 1.85552083796145e-252 |         | 1.54990564112074e-251 | 100                   |
| 99.9548532731377      |         |                       |                       |
| STAT5A-regulon        | Naive 2 |                       |                       |
| 0.0668673772932277    |         | -0.00571246068969752  | 127998107             |
| 0.440258087235025     |         | 1.24108469060338e-61  |                       |
| 2.75365665727625e-61  |         | 100                   | 100                   |
| TBP-regulon           | Naive 2 |                       |                       |
| 0.0190191852258313    |         | -0.00226799264886471  | 142905947             |
| 0.491534604341687     |         | 0.0120525427487768    | 0.0134760714198921    |
| 49.7085869705997      |         | 49.9216571504448      |                       |
| TCF12-regulon         | Naive 2 | 0.00960083571226177   |                       |
| 0.000671358010369187  |         | 147056428.5           | 0.505810464267446     |
| 0.0346704085420747    |         | 0.0381643256819737    | 26.0199456029012      |
| 25.0564334085779      |         |                       |                       |
| TFDP1-regulon         | Naive 2 | 0.515282114766877     | -0.0155224210649317   |
| 116670433             |         | 0.401295791581216     |                       |
| 6.44385289492237e-165 |         | 2.69125620905581e-164 | 100                   |
| TFDP2-regulon         | Naive 2 |                       | 100                   |
| 0.0264447820484241    |         | -0.000817468940733833 | 145252406             |
| 0.499605407694391     |         | 0.912875194438426     | 0.912875194438426     |
| 100                   |         | 99.9946886203691      |                       |
| TFEC-regulon          | Naive 2 |                       |                       |
| 0.0870584846891417    |         | -0.00540229351580983  | 130672420             |
| 0.449456566444157     |         | 1.26631284578035e-44  |                       |
| 2.24770530126012e-44  |         | 100                   | 100                   |
| THAP1-regulon         | Naive 2 | 0.038537992229535     | 0.00165438231870561   |
| 161330975.5           |         | 0.554908727559468     |                       |
| 2.40724189346661e-52  |         | 4.68258012153779e-52  | 100                   |
| THAP11-regulon        | Naive 2 | 0.180927080027543     | 0.00295160316097004   |
| 164662117             |         | 0.566366412516475     |                       |
| 1.26194446034978e-75  |         | 3.19993059588695e-75  | 100                   |
| TP53-regulon          | Naive 2 |                       | 100                   |
| 0.0938250885915372    |         | -0.00546078990985582  | 128466022.5           |
| 0.441867514029264     |         | 1.87437053284861e-58  |                       |
| 3.97254650245526e-58  |         | 100                   | 100                   |
| USF2-regulon          | Naive 2 | 0.132644079252153     | 0.00886657541084916   |
| 197964310             |         | 0.680911542398057     | 0                     |
| 100                   |         |                       | 0                     |
| XBP1-regulon          | Naive 2 |                       | 100                   |
| 0.192521415235118     |         | -0.00333611076274126  | 157102383             |
| 0.540364199602142     |         | 4.45026983744113e-29  |                       |



|                       |                      |                       |                       |         |
|-----------------------|----------------------|-----------------------|-----------------------|---------|
| 6.79503566577033e-29  | 100                  | 100                   |                       |         |
| YBX1-regulon          | Naive 2              |                       |                       |         |
| 0.0936940840004509    |                      | -0.00179513022003032  | 135493046.5           |         |
| 0.46603743511407      | 4.63324726584135e-21 |                       | 6.14879543691095e-21  | 100     |
|                       | 100                  |                       |                       |         |
| YY1-regulon           | Naive 2              | 0.63104953981379      | -0.0101486456462108   |         |
| 121109868             |                      | 0.416565526480531     | 2.06641854131142e-118 |         |
| 6.37894419274394e-118 |                      | 100                   | 100                   |         |
| YY2-regulon           | Naive 2              | 0.0619972438752862    | 0.0132497039249072    |         |
|                       |                      | 179778567.5           | 0.618360459451192     |         |
| 1.98455546048057e-236 |                      | 1.56559375215689e-235 | 96.6196088589561      |         |
| 89.2816359049263      |                      |                       |                       |         |
| ZBTB33-regulon        | Naive 2              | 0.375064521165253     | 0.0111328246491484    |         |
|                       |                      | 185199534.5           | 0.637006239598426     | 0 0 100 |
|                       | 100                  |                       |                       |         |
| ZNF143-regulon        | Naive 2              | 0.0254888053140338    | 0.00260057258277177   |         |
|                       |                      | 172068844.5           | 0.591842349295923     |         |
| 4.67300963770085e-143 |                      | 1.74622991724611e-142 | 100                   |         |
| 99.9920329305537      |                      |                       |                       |         |
| ZNF274-regulon        | Naive 2              | 0.0695084872441402    | 0.00502137343129905   |         |
|                       |                      | 175087055             | 0.602223687057447     |         |
| 9.71909412935524e-177 |                      | 4.60037122122815e-176 | 100 100               |         |
| ZNF76-regulon         | Naive 2              | 0.0154917004363083    | 0.00112622832652083   |         |
|                       |                      | 159019669             | 0.546958833591865     |         |
| 9.31705396992956e-39  |                      | 1.55649607497647e-38  | 99.6891594353063      |         |
| 99.4130925507901      |                      |                       |                       |         |
| ATF1-regulon          | Naive IER2           |                       |                       |         |
| 0.103055148934322     |                      | -0.00325087998287522  | 22164572              |         |
| 0.450302030199444     |                      | 1.42732701211367e-08  |                       |         |
| 2.15617484808661e-08  |                      | 100 100               |                       |         |
| ATF3-regulon          | Naive IER2           |                       |                       |         |
| 0.0503477747759822    |                      | -0.000690938657397333 | 25673826.5            |         |
| 0.521597087276862     |                      | 0.013738581410263     | 0.0157328916149787    |         |
|                       | 100 100              |                       |                       |         |
| ATF4-regulon          | Naive IER2           |                       |                       |         |
| 0.105604591682537     |                      | -0.00322611104235529  | 23495478.5            |         |
| 0.477341122086968     |                      | 0.00973317393864056   | 0.0112907812238142    |         |
|                       | 100 100              |                       |                       |         |
| ATF5-regulon          | Naive IER2           |                       |                       |         |
| 0.110153875163709     |                      | -0.00848756560340466  | 20796800.5            |         |
| 0.422513978018742     |                      | 9.53440328197904e-19  |                       |         |
| 2.02072427767317e-18  |                      | 100 99.9977408277607  |                       |         |
| ATF6-regulon          | Naive IER2           |                       |                       |         |
| 0.133380814033377     |                      | -0.00310932980165976  | 26371827.5            |         |
| 0.535777882980079     |                      | 4.46642981273591e-05  |                       |         |
| 5.76575484916818e-05  |                      | 100 100               |                       |         |
| ATF6B-regulon         | Naive IER2           | 0.0592273764232438    |                       |         |
| 0.0019793721898586    |                      | 27043317.4121094      | 0.549420071544843     |         |
| 1.71245350690566e-08  |                      | 2.55966734716424e-08  | 100                   |         |
| 99.9186697993855      |                      |                       |                       |         |

BACH1-regulon Naive IER2 0.047220389180006  
 0.00403647247768725 27493238.5 0.558560802045152  
 2.36919956844817e-11 3.91193417115861e-11 99.910071942446  
 99.5549430688596  
 BATF-regulon Naive IER2  
 0.0192677048821272 -2.62927613624633e-05 25363519  
 0.51529278790956 0.0640094753914308 0.0699180423506398  
 53.8669064748201 51.6627507681186  
 BATF3-regulon Naive IER2  
 0.0658370524007427 -0.0177618403578975 17078665.5  
 0.3469752426416 2.95541550002954e-68 1.31146562813811e-67 100  
 100  
 BCL11A-regulon Naive IER2 0.21787280638548 0.013708417923018  
 32365672 0.657550608708768 3.05495478708351e-72  
 1.60667992505873e-71 100 100  
 BHLHE40-regulon Naive IER2 0.0597481379441849  
 0.00419988543418495 27967089.5 0.568187699749833  
 7.27627654017927e-15 1.37764169160728e-14 100 100  
 BRF2-regulon Naive IER2  
 0.0375496626185022 -0.00416473513652753 21208560  
 0.430879406361049 3.11976258832696e-15  
 6.06857928140312e-15 99.5503597122302 99.7334176757636  
 CEBPB-regulon Naive IER2  
 0.13867501102544 -0.00452797423969484 22419482 0.455480857497266  
 3.78984753601596e-07 5.27606225602221e-07 100 100  
 CEBPG-regulon Naive IER2  
 0.0603961181518532 -0.00785716602627801 21113938.5  
 0.428957047853494 5.25969040431801e-16 1.0373278297405e-15  
 100 100  
 CLOCK-regulon Naive IER2 0.0172560505988654  
 0.00170305917428646 25658155.5 0.521278710584758  
 0.00978004289105034 0.0112907812238142 54.3165467625899  
 51.0121091632026  
 CREB1-regulon Naive IER2 0.0466525334514206  
 0.00377381960030827 27958576 0.568014736954337  
 8.50286880108007e-15 1.58869390757022e-14 100  
 99.9932224832821  
 CREB3-regulon Naive IER2  
 0.230526481564216 -0.00950650158185443 19898669  
 0.404267271615565 9.02640072590797e-28  
 2.28883732692666e-27 100 100  
 CREB3L2-regulon Naive IER2  
 0.124740065879022 -0.00208831391795469 27288570.5  
 0.554402706147029 5.40589704195306e-10  
 8.52930422174816e-10 100 100  
 CREB3L4-regulon Naive IER2 0.0141071784018296  
 0.00308134632994188 26376158.5 0.535865872862888  
 6.51325439502506e-07 8.97943809799572e-07 37.5  
 31.1923911078981  
 CREB5-regulon Naive IER2

|                       |                       |                       |     |
|-----------------------|-----------------------|-----------------------|-----|
| 0.0362216117589015    | -0.00302687871436812  | 24024026              |     |
| 0.488079250136851     | 0.173815275991042     | 0.181483596990646     |     |
| 99.8201438848921      | 99.6181998915597      |                       |     |
| CREM-regulon          | Naive IER2            |                       |     |
| 0.143948307588687     | -0.00620326993032255  | 18641965.5            |     |
| 0.378735709922935     | 1.56446118597845e-43  |                       |     |
| 4.72666996614767e-43  | 100                   | 100                   |     |
| CTCF-regulon          | Naive IER2            |                       |     |
| 0.362930969261824     | -0.00810797938788016  | 20384888.5            |     |
| 0.414145451441124     | 1.18052848152772e-22  |                       |     |
| 2.74811548158911e-22  | 100                   | 100                   |     |
| CUX1-regulon          | Naive IER2            |                       |     |
| 0.075872999638201     | -0.000845793176756746 | 25370643              |     |
| 0.515437521210214     | 0.0781914794404933    | 0.084757176187405     |     |
| 100                   | 100                   |                       |     |
| DDIT3-regulon         | Naive IER2            | 0.0858271019984974    |     |
| 0.000942061261668667  | 25779729              | 0.523748633932182     |     |
| 0.00673850176611877   | 0.00797389375657388   | 100                   | 100 |
| E2F1-regulon          | Naive IER2            |                       |     |
| 0.402057130850105     | -0.0365330903931071   | 13093854.5            |     |
| 0.26601863841477      | 5.36428904314043e-157 | 5.85945418558417e-156 | 100 |
| 100                   |                       |                       |     |
| E2F2-regulon          | Naive IER2            |                       |     |
| 0.0511010271406896    | -0.0028908078628158   | 23052798              |     |
| 0.468347493521539     | 0.0003047162171481    |                       |     |
| 0.000376258285522002  | 100                   | 100                   |     |
| E2F3-regulon          | Naive IER2            | 0.0231879748128689    |     |
| 0.00212474212544142   | 28501761.5            | 0.579050254961402     |     |
| 1.8998313275993e-19   | 4.21525075811094e-19  | 100                   | 100 |
| E2F4-regulon          | Naive IER2            |                       |     |
| 0.367257865130643     | -0.0321884786248593   | 14357584.5            |     |
| 0.291692952569085     | 7.52444597904968e-125 |                       |     |
| 5.34235664512528e-124 | 100                   | 100                   |     |
| E2F6-regulon          | Naive IER2            |                       |     |
| 0.0592206313372646    | -0.013511710692667    | 18101952              |     |
| 0.367764635210321     | 1.9771111757914e-51   |                       |     |
| 7.79860519339942e-51  | 100                   | 100                   |     |
| E2F7-regulon          | Naive IER2            | 0.0325742627531492    |     |
| 0.00205048541596473   | 28125300.5            | 0.571401961432842     |     |
| 3.75220193462664e-16  | 7.61160963881404e-16  | 100                   | 100 |
| E2F8-regulon          | Naive IER2            |                       |     |
| 0.067091122984974     | -0.00789906505152452  | 18174849.5            |     |
| 0.369245642479329     | 2.5222509083381e-50   |                       |     |
| 9.67998997254082e-50  | 100                   | 100                   |     |
| EGR1-regulon          | Naive IER2            | 0.0606741752149668    |     |
| 0.0135430579517263    | 41320952.5            | 0.83948874810327      | 0   |
| 100                   | 100                   |                       |     |
| EGR2-regulon          | Naive IER2            | 0.0667659619323777    |     |
| 0.0212385320449638    | 37869722              | 0.769372523849708     |     |
| 2.06870496487783e-207 | 3.67195131265815e-206 | 100                   |     |

99.9954816555214  
 EGR3-regulon Naive IER2 0.0568364240646317  
 0.0157512877071368 36032118.5 0.732039225162433  
 1.95590860248605e-154 1.98385015395014e-153 100  
 99.9954816555214  
 ELF1-regulon Naive IER2  
 0.692926260975185 -0.0144730609826585 19275539.5  
 0.391607587551863 3.96384622006873e-35  
 1.10365914362698e-34 100 100  
 ELF2-regulon Naive IER2 0.0481236591274094  
 0.0158561740052438 36593197 0.743438262673794  
 8.92786596443728e-170 1.15250633359099e-168 100  
 99.5233146575095  
 ELF4-regulon Naive IER2 0.0206016721892196  
 0.0022086974006711 27697737.5 0.562715464489063  
 8.3508062921323e-13 1.41168392081284e-12 99.3705035971223  
 98.3101391650099  
 ELK1-regulon Naive IER2  
 0.0628419692345574 -0.00329371911633701 21217211  
 0.431055162647399 3.66254336097876e-15  
 7.02812374674303e-15 100 100  
 ELK3-regulon Naive IER2 0.0699270212480735  
 0.00514771688913307 28894101.5 0.587021150971867  
 3.13530928042837e-23 7.54599860713269e-23 100 100  
 ELK4-regulon Naive IER2 0.0481331402410539  
 0.00321489215381972 26424254.5 0.536843005488976  
 2.62797015276727e-05 3.45529408974956e-05 97.7517985611511  
 96.7038677028737  
 ESRRA-regulon Naive IER2  
 0.0773548911058601 -0.014742109626654 15917374  
 0.323382099489395 2.66578885609705e-90  
 1.64583485898166e-89 100 100  
 ETS1-regulon Naive IER2  
 0.238886774803557 -0.00415403114626378 23763445.5  
 0.482785219276233 0.0495247369609796 0.0545156019260395  
 100 100  
 ETV2-regulon Naive IER2 0.0340794792635027  
 0.00561505805806952 32277114.5 0.655751448226924  
 1.21121498963708e-70 6.14259030458803e-70 100 100  
 ETV3-regulon Naive IER2 0.0126336070573483  
 0.00123481224239713 26294118 0.534199113689349  
 9.25625280530369e-05 0.000116317513128595 86.4208633093525  
 84.2964937646846  
 ETV5-regulon Naive IER2 0.0353274624161882  
 0.00191064311698332 27823410 0.565268664338365  
 9.58125985564984e-14 1.72220113861048e-13 100 100  
 ETV6-regulon Naive IER2 0.465246485063484  
 0.00581407163159442 26977527 0.54808345398505  
 4.11424366155636e-08 5.90123838324245e-08 100 100  
 ETV7-regulon Naive IER2

|                       |                       |                     |                     |
|-----------------------|-----------------------|---------------------|---------------------|
| 0.0639435433427844    | -0.000135865713256203 | 25857254.5          |                     |
| 0.525323665024243     | 0.00386229569507605   | 0.00464784736187118 |                     |
| 100                   | 100                   |                     |                     |
| FLI1-regulon          | Naive IER2            | 0.155232406797076   |                     |
| 0.0115847921511826    | 30654875              | 0.622793548551724   |                     |
| 1.36155214702777e-44  | 4.29645344173208e-44  | 100                 | 100                 |
| FOS-regulon           | Naive IER2            | 0.100109304383603   |                     |
| 0.0141792616614273    | 38454105.5            | 0.781245032665355   |                     |
| 6.59659209009127e-226 | 1.33816582398994e-224 | 100                 | 100                 |
| FOSB-regulon          | Naive IER2            | 0.0812888778825248  |                     |
| 0.0408156381587934    | 44119566              | 0.896346211481926   | 0 0                 |
| 100                   | 99.3064341225375      |                     |                     |
| FOSL1-regulon         | Naive IER2            |                     |                     |
| 0.0546585353870082    | -0.00628929899168629  | 23187572.5          |                     |
| 0.47108561230719      | 0.000970772068685802  | 0.0011883589116671  | 100                 |
| 100                   |                       |                     |                     |
| FOXO1-regulon         | Naive IER2            | 0.0218600484345053  |                     |
| 0.00529276979458557   | 27612009              | 0.56097377881176    | 1.7497743943235e-13 |
| 3.03009712187729e-13  | 60.6115107913669      | 52.1349177661305    |                     |
| FOXO3-regulon         | Naive IER2            | 0.0596865074362217  |                     |
| 0.0409460324296688    | 40175259              | 0.81621249855348    | 0 0                 |
| 87.589928057554       | 45.7346828122176      |                     |                     |
| GABPA-regulon         | Naive IER2            | 0.0277183653089999  |                     |
| 0.00228647136313525   | 28461833              | 0.578239055692009   |                     |
| 4.40287714767232e-19  | 9.47285689347681e-19  | 100                 | 100                 |
| GTF2B-regulon         | Naive IER2            |                     |                     |
| 0.0747438623805913    | -0.0044214723350172   | 21775033            |                     |
| 0.442388040137202     | 4.93144363924324e-11  |                     |                     |
| 8.04902295140851e-11  | 100                   | 100                 |                     |
| HINFP-regulon         | Naive IER2            | 0.0188493312520496  |                     |
| 0.00268457426060951   | 26303140              | 0.534382407321928   |                     |
| 5.72224054260631e-05  | 7.32034375720808e-05  | 65.4676258992806    |                     |
| 63.1777516717875      |                       |                     |                     |
| HIVEP3-regulon        | Naive IER2            | 0.085461796561606   |                     |
| 0.00796912321681326   | 27890680.5            | 0.566635351803502   |                     |
| 2.90515667626258e-14  | 5.28887497473445e-14  | 100                 |                     |
| 99.6859750587385      |                       |                     |                     |
| HOXB2-regulon         | Naive IER2            | 0.0432154199205294  |                     |
| 0.00626625850109962   | 27802108.5            | 0.56483589673535    |                     |
| 1.23325606450476e-13  | 2.18902951449595e-13  | 88.8489208633094    |                     |
| 83.6006687149828      |                       |                     |                     |
| IKZF1-regulon         | Naive IER2            |                     |                     |
| 0.141277489147638     | -0.00265162557215975  | 21111794.5          |                     |
| 0.428913489712477     | 5.04897310162851e-16  | 1.0097946203257e-15 |                     |
| 100                   | 100                   |                     |                     |
| IRF1-regulon          | Naive IER2            | 0.148640416380036   |                     |
| 0.0135295319727374    | 36296476              | 0.737409990677258   |                     |
| 1.42850886965279e-161 | 1.69040216242247e-160 | 100                 | 100                 |
| IRF2-regulon          | Naive IER2            | 0.0916636744080671  |                     |
| 0.00681014474608863   | 29873439.5            | 0.606917672756788   |                     |

|                       |                       |                    |                    |
|-----------------------|-----------------------|--------------------|--------------------|
| 3.17314088735094e-34  | 8.5016227547893e-34   | 100                | 100                |
| IRF3-regulon          | Naive IER2            | 0.147435108625449  |                    |
| 0.00203853690270112   | 27022447              | 0.548996062051497  |                    |
| 2.27074079140446e-08  | 3.32417724102509e-08  | 100                | 100                |
| IRF4-regulon          | Naive IER2            |                    |                    |
| 0.0551430441569553    | -0.0033514373935441   | 22921749.5         |                    |
| 0.465685073258942     | 9.03985860945043e-05  |                    |                    |
| 0.000114612493084104  | 100                   | 99.9954816555214   |                    |
| IRF5-regulon          | Naive IER2            | 0.0543034694057786 |                    |
| 0.00744106640654218   | 27795096              | 0.564693428701824  |                    |
| 1.27706971527721e-13  | 2.23881357493042e-13  | 91.5467625899281   |                    |
| 80.2006144948491      |                       |                    |                    |
| IRF7-regulon          | Naive IER2            | 0.115915911771861  |                    |
| 0.00828423284012281   | 32737313.5            | 0.665100987843378  |                    |
| 3.79262595773914e-79  | 2.15421154399583e-78  | 100                | 100                |
| IRF8-regulon          | Naive IER2            |                    |                    |
| 0.081419818168316     | -0.000361977193346366 | 25502060.5         |                    |
| 0.518107438186447     | 0.0388388532436958    | 0.0434261193748409 |                    |
| 100                   | 100                   |                    |                    |
| IRF9-regulon          | Naive IER2            | 0.0397234188333224 |                    |
| 0.00595308609408338   | 31889584.5            | 0.647878273605587  |                    |
| 7.28674628180972e-64  | 3.13550900611206e-63  | 100                | 100                |
| JUN-regulon           | Naive IER2            | 0.108420914747428  |                    |
| 0.0205235896185669    | 41126695              | 0.835542155016272  | 0 0                |
| 100                   | 100                   |                    |                    |
| JUNB-regulon          | Naive IER2            | 0.19002292615431   | 0.0310001354681884 |
| 42266646.5            | 0.858701748388024     | 0                  | 0 100              |
| 100                   |                       |                    |                    |
| JUND-regulon          | Naive IER2            | 0.0557838765558418 |                    |
| 0.0177614572406631    | 42414844.5            | 0.86171258298801   | 0 0                |
| 100                   | 100                   |                    |                    |
| KLF11-regulon         | Naive IER2            | 0.0267940977167504 |                    |
| 0.00497964270452773   | 26224411              | 0.532782925566288  |                    |
| 2.67216101261237e-05  | 3.48116388799043e-05  | 46.1330935251799   |                    |
| 40.7260979577083      |                       |                    |                    |
| KLF12-regulon         | Naive IER2            | 0.0478559998742906 |                    |
| 0.000826632778518133  | 25200663              | 0.511984157026448  |                    |
| 0.171536826086622     | 0.180431328180003     | 99.1007194244604   |                    |
| 98.5902765226821      |                       |                    |                    |
| KLF13-regulon         | Naive IER2            | 0.0693002797116579 |                    |
| 0.00308375246481983   | 30730779              | 0.624335636768012  |                    |
| 1.12586644392118e-45  | 3.63347806901836e-45  | 100                | 100                |
| KLF2-regulon          | Naive IER2            | 0.126382155020419  |                    |
| 0.0179742716761676    | 35321689              | 0.717605928360511  |                    |
| 4.60275708812888e-136 | 3.84465592067236e-135 | 100                | 100                |
| KLF3-regulon          | Naive IER2            | 0.104326315924057  |                    |
| 0.0331084662278886    | 37843417.5            | 0.768838113812222  |                    |
| 1.34753420970925e-206 | 2.1261095308746e-205  | 100                |                    |
| 99.8599313211639      |                       |                    |                    |
| KLF4-regulon          | Naive IER2            | 0.0275097409339083 |                    |

|                          |                       |                     |                     |
|--------------------------|-----------------------|---------------------|---------------------|
| 0.0119016144062501       | 30430544              | 0.61823597330341    | 3.2241367892692e-47 |
| 1.17391647199033e-46     | 65.4676258992806      | 49.4193927345021    |                     |
| KLF6-regulon Naive IER2  | 0.0839047219660382    |                     |                     |
| 0.0148897380706899       | 33090589.5            | 0.672278248023306   |                     |
| 5.20243692327453e-86     | 3.07810851293743e-85  | 100                 | 100                 |
| KLF7-regulon Naive IER2  | 0.0663345266048588    |                     |                     |
| 0.0208466642477628       | 35660268              | 0.724484599921725   |                     |
| 1.12706682558234e-144    | 1.06695659488461e-143 | 99.6402877697842    |                     |
| 97.5036146755829         |                       |                     |                     |
| KLF8-regulon Naive IER2  | 0.0354203084418912    |                     |                     |
| 0.0105726825753786       | 31114659.5            | 0.632134667063024   |                     |
| 6.47014070177305e-52     | 2.62502851329078e-51  | 91.4568345323741    |                     |
| 77.2885414784023         |                       |                     |                     |
| MAFB-regulon Naive IER2  | 0.0645967690749586    |                     |                     |
| 0.00903528553926054      | 32143030              | 0.653027347686283   |                     |
| 2.93988538480613e-68     | 1.31146562813811e-67  | 100                 |                     |
| 99.9977408277607         |                       |                     |                     |
| MAFF-regulon Naive IER2  | 0.0178305071678698    |                     |                     |
| 0.00558031962981552      | 26734643.5            | 0.543148960634493   |                     |
| 6.53583448480844e-10     | 1.01987746905802e-09  | 35.6115107913669    |                     |
| 28.3684258087837         |                       |                     |                     |
| MAFG-regulon Naive IER2  | 0.0275761705099298    |                     |                     |
| 0.00222330287581463      | 25701611.5            | 0.522161575592228   |                     |
| 0.00871079780039383      | 0.0102225891541812    | 61.6007194244604    |                     |
| 58.5261160310862         |                       |                     |                     |
| MAX-regulon Naive IER2   | 0.202249989142664     |                     |                     |
| 0.00469483236357809      | 29142814.5            | 0.592074078176461   |                     |
| 8.20966271061004e-26     | 2.00995190501142e-25  | 100                 | 100                 |
| MAZ-regulon Naive IER2   |                       |                     |                     |
| 0.128087414369775        | -0.00842281107702753  | 17000232.5          |                     |
| 0.345381774509906        | 1.20371756729377e-69  |                     |                     |
| 5.89406532950742e-69     | 100                   | 100                 |                     |
| MEF2A-regulon Naive IER2 | 0.0465653324354139    |                     |                     |
| 0.00595700151963501      | 30241190.5            | 0.614389011337469   |                     |
| 6.29432281081574e-39     | 1.86207049819966e-38  | 100                 |                     |
| 99.9977408277607         |                       |                     |                     |
| MLX-regulon Naive IER2   | 0.0533181725596847    |                     |                     |
| 0.000402580558037227     | 25141140.5            | 0.510774880231365   |                     |
| 0.218954420966362        | 0.226945458227908     | 100                 |                     |
| 99.9887041388035         |                       |                     |                     |
| MXD4-regulon Naive IER2  |                       |                     |                     |
| 0.0614971320515581       | -0.0314425392646916   | 20677856            |                     |
| 0.420097466216436        | 7.3144700253822e-20   |                     |                     |
| 1.64865832318139e-19     | 82.0143884892086      | 88.7696547984818    |                     |
| MXI1-regulon Naive IER2  | 0.0869836362415831    |                     |                     |
| 0.0223005906804348       | 37820094              | 0.768364266656438   |                     |
| 7.07622618924483e-206    | 1.00482411887277e-204 | 100                 | 100                 |
| MYBL1-regulon Naive IER2 |                       |                     |                     |
| 0.0227542438382437       | -0.00731524501782968  | 23443922            |                     |
| 0.476293684914711        | 0.00661844938084628   | 0.00789764547966531 |                     |

80.3057553956834 80.0537682992951

MYC-regulon Naive IER2  
0.289370578094755 -0.0261520727688696 19053166  
0.387089781455154 5.6835113401434e-38  
1.64705838836809e-37 100 100

NFATC1-regulon Naive IER2 0.0507722434485079  
0.000260792365043526 25552055.5 0.519123151460758  
0.0291150846338687 0.0330747361440749 94.7841726618705  
94.8287547442617

NFE2L1-regulon Naive IER2  
0.146138546454548 -0.0374462673043997 18400024  
0.373820354524261 5.48814552929585e-47  
1.90077235404881e-46 100 99.9344840050605

NFE2L2-regulon Naive IER2  
0.109298928489174 -0.00162133305494308 25056234.5  
0.50904990470844 0.30183358882125 0.308347982824587 100 100

NFKB1-regulon Naive IER2  
0.0540640981190951 -0.00267013375529857 24681452  
0.501435712084589 0.86988833954662 0.876057760394468 100  
99.929965660582

NFKB2-regulon Naive IER2 0.0763897039216764  
0.00308880634113266 27774067.5 0.564266207447922  
2.26440308701245e-13 3.87403901633456e-13 100 100

NFYA-regulon Naive IER2 0.0239235021933432  
0.00304983645465081 28388919 0.576757713204098  
1.99896097449925e-18 4.17430085851314e-18 99.6402877697842  
99.0014458702332

NFYB-regulon Naive IER2  
0.0968741682570224 -0.0120459302007714 16578118.5  
0.336805981069112 2.25687788082004e-77 1.2326025349094e-76  
100 100

NFYC-regulon Naive IER2  
0.0784988935769003 -0.00516235565614892 19922621.5  
0.404753897722234 1.66102879431846e-27  
4.13800155777582e-27 100 100

NR1H3-regulon Naive IER2 0.0100651458528609  
0.00156921328032193 25559654.5 0.519277535002542  
0.00245624671110854 0.0029810857519437 25.8093525179856  
22.0111151274173

NR2C2-regulon Naive IER2 0.0239199301151334  
0.00218736598830165 26432085.5 0.537002102411691  
2.12663170828402e-05 2.82225890258253e-05 79.7661870503597  
75.883336345563

NR3C1-regulon Naive IER2 0.229573267146124  
0.00419857349328157 27361360.5 0.555881529414098  
1.82289945432903e-10 2.9414968467582e-10 100 100

NRF1-regulon Naive IER2  
0.0258494283323058 -0.000901838392153083 24105082  
0.48972600791588 0.241130248443284 0.248119531006858  
99.910071942446 99.9683715886499



|                      |       |                      |                     |     |  |
|----------------------|-------|----------------------|---------------------|-----|--|
| PAX5-regulon         | Naive | IER2                 | 0.104001102070847   |     |  |
| 0.00382721405727014  |       | 27180518             | 0.55220747945291    |     |  |
| 2.57871099444891e-09 |       | 3.98018436099723e-09 | 100                 | 100 |  |
| POU2F1-regulon       | Naive | IER2                 | 0.00615810519005609 |     |  |
| 0.00131023335075047  |       | 26178373.5           | 0.531847614037814   |     |  |
| 7.31898944685654e-08 |       | 1.03929650145363e-07 | 24.4604316546763    |     |  |
| 18.1931140430146     |       |                      |                     |     |  |
| POU6F1-regulon       | Naive | IER2                 | 0.0358436258342111  |     |  |
| 0.00496312400818403  |       | 26708449.5           | 0.542616795547838   |     |  |
| 6.81539601300414e-07 |       | 9.3056368639095e-07  | 70.863309352518     |     |  |
| 65.2155250316284     |       |                      |                     |     |  |
| REL-regulon          | Naive | IER2                 |                     |     |  |
| 0.259127121005556    |       | -0.00470004187145828 | 22238234.5          |     |  |
| 0.451798579435747    |       | 3.81225538413528e-08 |                     |     |  |
| 5.52388025048173e-08 |       | 100                  | 100                 |     |  |
| RELA-regulon         | Naive | IER2                 | 0.0959969144231611  |     |  |
| 0.00403124381801338  |       | 29590525             | 0.601169897716383   |     |  |
| 8.050359705362e-31   |       | 2.11694644103964e-30 | 100                 | 100 |  |
| RELB-regulon         | Naive | IER2                 |                     |     |  |
| 0.0991879882215737   |       | -0.00614631430293847 | 19128416.5          |     |  |
| 0.388618592971276    |       | 5.36644258671907e-37 |                     |     |  |
| 1.52406969462822e-36 |       | 100                  | 100                 |     |  |
| REST-regulon         | Naive | IER2                 | 0.221790015629368   |     |  |
| 0.00325121904969131  |       | 27566182             | 0.560042743863828   |     |  |
| 7.36845295282047e-12 |       | 1.23096508153001e-11 | 100                 | 100 |  |
| RFX5-regulon         | Naive | IER2                 |                     |     |  |
| 0.063192895409136    |       | -0.00220973152629739 | 24634614.5          |     |  |
| 0.500484147518421    |       | 0.955950769454464    | 0.955950769454464   |     |  |
| 100                  | 100   |                      |                     |     |  |
| RXRA-regulon         | Naive | IER2                 | 0.0216323278373638  |     |  |
| 0.00728061023017895  |       | 29766082             | 0.604736565889165   |     |  |
| 2.10047206837806e-34 |       | 5.73590449441702e-34 | 74.5503597122302    |     |  |
| 64.0046087113681     |       |                      |                     |     |  |
| SETDB1-regulon       | Naive | IER2                 |                     |     |  |
| 0.0585052755758041   |       | -0.00124270551434897 | 24003446.5          |     |  |
| 0.487661150900353    |       | 0.159180032385588    | 0.168683317901146   |     |  |
| 93.1654676258993     |       | 95.0998554129767     |                     |     |  |
| SOX5-regulon         | Naive | IER2                 | 0.0104693384631511  |     |  |
| 0.00273301105884754  |       | 26077807             | 0.529804475143904   |     |  |
| 3.29520383914366e-06 |       | 4.41432967130566e-06 | 27.9676258992806    |     |  |
| 22.3567684800289     |       |                      |                     |     |  |
| SP1-regulon          | Naive | IER2                 | 0.0216039772585879  |     |  |
| 0.00882640650965402  |       | 31282092             | 0.635536275479887   |     |  |
| 1.48407857193023e-57 |       | 6.19821050629682e-57 | 76.0791366906475    |     |  |
| 59.4139707211278     |       |                      |                     |     |  |
| SP2-regulon          | Naive | IER2                 | 0.0286816494135892  |     |  |
| 0.000452583530333603 |       | 25299285.5           | 0.513987801038764   |     |  |
| 0.110516105563665    |       | 0.11799463902286     | 100                 | 100 |  |
| SP3-regulon          | Naive | IER2                 | 0.0327413104834819  |     |  |
| 0.0045837409199695   |       | 32185507.5           | 0.653890333197024   |     |  |

|                           |                              |                  |     |
|---------------------------|------------------------------|------------------|-----|
| 5.21543072218602e-69      | 2.46863720850138e-68         | 100              | 100 |
| SP4-regulon Naive IER2    | 0.0131900052113683           |                  |     |
| 0.00466643825195517       | 27245065 0.553518835482852   |                  |     |
| 2.56238359280934e-14      | 4.7254346776484e-14          | 38.1294964028777 |     |
| 28.7863726730526          |                              |                  |     |
| SPI1-regulon Naive IER2   |                              |                  |     |
| 0.414567363186047         | -0.00407548987433565         | 21927624.5       |     |
| 0.445488134388567         | 4.99381625513562e-10         |                  |     |
| 7.96766189021638e-10      | 100 100                      |                  |     |
| SPIB-regulon Naive IER2   |                              |                  |     |
| 0.546106911182564         | -0.0188051545315081          | 15577006.5       |     |
| 0.316467092230788         | 2.34358227948331e-97         |                  |     |
| 1.51267583493922e-96      | 100 100                      |                  |     |
| SREBF1-regulon Naive IER2 | 0.0443351681889132           |                  |     |
| 0.00349083572496019       | 26812017 0.544720903649392   |                  |     |
| 3.35518122437569e-07      | 4.71718548377572e-07         | 97.4820143884892 |     |
| 96.8800831375384          |                              |                  |     |
| SREBF2-regulon Naive IER2 | 0.102252191998654            |                  |     |
| 0.00335169581353077       | 28281536.5 0.574576098429046 |                  |     |
| 1.76285585211604e-17      | 3.62790624638374e-17         | 100 100          |     |
| SRF-regulon Naive IER2    | 0.0243354934373112           |                  |     |
| 0.00365591028390685       | 28882347 0.586782343057417   |                  |     |
| 4.11695523667599e-23      | 9.74346072679985e-23         | 99.4604316546763 |     |
| 97.8967106452196          |                              |                  |     |
| STAT1-regulon Naive IER2  | 0.0848338804934895           |                  |     |
| 0.0051926224546163        | 30761107.5 0.624951799585093 |                  |     |
| 4.12286647590441e-46      | 1.39392152280578e-45         | 100 100          |     |
| STAT2-regulon Naive IER2  | 0.0755877613745902           |                  |     |
| 0.00958838297013112       | 30825053 0.626250935362319   |                  |     |
| 4.87880254147115e-47      | 1.73197490222226e-46         | 100              |     |
| 99.961594071932           |                              |                  |     |
| STAT5A-regulon Naive IER2 |                              |                  |     |
| 0.0650905027676279        | -0.00668105380770329         | 20398702         |     |
| 0.414426090611335         | 1.61976941972643e-22         |                  |     |
| 3.70979447743794e-22      | 100 100                      |                  |     |
| TBP-regulon Naive IER2    | 0.0220016186033649           |                  |     |
| 0.00112799642476875       | 25295032 0.513901385668982   |                  |     |
| 0.0898176467802267        | 0.0966220139605469           | 52.2482014388489 |     |
| 49.8260437375746          |                              |                  |     |
| TCF12-regulon Naive IER2  | 0.0108309514916284           |                  |     |
| 0.00183213716530342       | 25282894.5 0.513654796612737 |                  |     |
| 0.041114013459255         | 0.045610858681361            | 27.2482014388489 |     |
| 25.1694379179469          |                              |                  |     |
| TFDP1-regulon Naive IER2  |                              |                  |     |
| 0.499516469172808         | -0.0293664987275548          | 13770273         |     |
| 0.279760957635482         | 2.5067150042572e-139         |                  |     |
| 2.22470956627826e-138     | 100 100                      |                  |     |
| TFDP2-regulon Naive IER2  | 0.0280831915877154           |                  |     |
| 0.000984155934654604      | 27033823 0.549227180247488   |                  |     |
| 1.95016267593001e-08      | 2.88461562481314e-08         | 100              |     |

99.9954816555214  
 TFEC-regulon Naive IER2  
 0.0888336877439296 -0.00277588443258096 23689081.5  
 0.481274418157504 0.0326456318029633 0.0367911088573078  
           100      100  
 THAP1-regulon Naive IER2 0.0386968777963919  
 0.00157024574581064 27172301.5 0.552040550597657  
 2.89675206625526e-09 4.4229977785833e-09 100 100  
 THAP11-regulon Naive IER2  
 0.177075670273541 -0.00143726170186309 22532403.5  
 0.457775004242043 1.45382226685438e-06  
 1.96612154184116e-06 100 100  
 TP53-regulon Naive IER2  
 0.0893143079156647 -0.00926954699087314 18641733  
 0.378730986383855 1.55277501606972e-43  
 4.72666996614767e-43 100 100  
 USF2-regulon Naive IER2 0.130396218937907  
 0.00523838757175746 29548202.5 0.600310061231694  
 2.50690640260178e-30 6.4723765303537e-30 100 100  
 XBP1-regulon Naive IER2 0.19743348320845 0.00219746849780697  
           30991194 0.629626305281457 1.72083037225277e-49  
 6.43047139104983e-49 100 100  
 YBX1-regulon Naive IER2  
 0.093659895655519 -0.00156214889695626 22948879.5  
 0.466236254399697 0.00011709477913947  
 0.000145854900331621 100 100  
 YY1-regulon Naive IER2  
 0.611500406505434 -0.0286736111695289 14029690.5  
 0.285031360642554 7.81416081555664e-133  
 6.16450464338358e-132 100 100  
 YY2-regulon Naive IER2 0.0732363679350018  
 0.0227928812268669 33699624 0.684651573879158  
 1.32114003105357e-98 8.93342306712415e-98 97.2122302158273  
 90.3623712271824  
 ZBTB33-regulon Naive IER2 0.367184343696422  
 0.00139245389793075 24926414 0.506412432858701  
 0.464413840274691 0.471048323707186 100 100  
 ZNF143-regulon Naive IER2 0.0269108958518955  
 0.00367010077829127 30755191 0.624831598213206  
 5.01737813770457e-46 1.65690161756756e-45 100  
 99.9932224832821  
 ZNF274-regulon Naive IER2 0.0765686593239556  
 0.0115091764153549 35024755 0.711573328992689  
 9.84628276799009e-129 7.35880080555049e-128 100 100  
 ZNF76-regulon Naive IER2 0.0165330195335459  
 0.00202555175744165 28475578.5 0.578518313354016  
 3.29980078673495e-19 7.20879556486711e-19 99.4604316546763  
 99.4600578348093  
 ATF1-regulon Naive IFN1  
 0.100754807787662 -0.00553264025477078 8939001.5

|                      |                       |                      |                     |
|----------------------|-----------------------|----------------------|---------------------|
| 0.397600409209436    | 2.88634897902108e-15  |                      |                     |
| 7.73323688718856e-15 | 100                   | 100                  |                     |
| ATF3-regulon         | Naive IFN1            |                      |                     |
| 0.0467041703345378   | -0.0043658140137273   |                      | 9972831.5           |
| 0.443584430025742    | 1.36116497645155e-05  |                      |                     |
| 2.32874008019422e-05 | 100                   | 100                  |                     |
| ATF4-regulon         | Naive IFN1            |                      |                     |
| 0.102179385949706    | -0.00664563152115363  |                      | 9424195.5           |
| 0.419181492168866    | 4.61484928954184e-10  |                      |                     |
| 1.04017237954752e-09 | 100                   | 100                  |                     |
| ATF5-regulon         | Naive IFN1            |                      |                     |
| 0.107104488343467    | -0.0114554335426059   |                      | 8853066             |
| 0.393778059479926    | 2.60242078891155e-16  |                      |                     |
| 7.24595592206744e-16 | 100                   | 99.9977715877437     |                     |
| ATF6-regulon         | Naive IFN1            |                      |                     |
| 0.130940290607503    | -0.00553476468664346  |                      | 10643529            |
| 0.473416576318116    | 0.0403872280829009    |                      | 0.0526145540162562  |
|                      | 100                   | 100                  |                     |
| ATF6B-regulon        | Naive IFN1            | 0.0590564901942148   |                     |
| 0.0017796277901611   | 12488801.2675781      | 0.555492970274632    |                     |
| 1.87553610527742e-05 | 3.17054913034992e-05  | 100                  |                     |
| 99.9197771587744     |                       |                      |                     |
| BACH1-regulon        | Naive IFN1            | 0.0442678811284809   |                     |
| 0.000996042616297363 | 11505492              | 0.511756075592548    |                     |
| 0.364684958011719    | 0.401436155330729     | 100                  |                     |
| 99.5587743732591     |                       |                      |                     |
| BATF-regulon         | Naive IFN1            |                      |                     |
| 0.0144858507620027   | -0.00486117516086274  |                      | 10482089            |
| 0.466235840297122    | 0.00571618305677411   |                      | 0.00803661380259331 |
|                      | 47.3053892215569      | 51.7660167130919     |                     |
| BATF3-regulon        | Naive IFN1            |                      |                     |
| 0.063417372681198    | -0.0199666961238113   |                      | 7236049.5           |
| 0.32185431921672     | 6.15600614953281e-43  | 4.85640485129811e-42 | 100                 |
|                      | 100                   |                      |                     |
| BCL11A-regulon       | Naive IFN1            | 0.222854178132567    |                     |
| 0.0185587551050765   | 16229260              | 0.721865906070867    |                     |
| 1.30674675684262e-65 | 2.06175599412946e-64  | 100                  | 100                 |
| BHLHE40-regulon      | Naive IFN1            |                      |                     |
| 0.0556002388140931   | -5.15062299338634e-05 |                      | 11167230            |
| 0.496710423164812    | 0.799767740385563     |                      | 0.828956344049269   |
|                      | 100                   | 100                  |                     |
| BRF2-regulon         | Naive IFN1            |                      |                     |
| 0.0363400207513596   | -0.00533117650020536  |                      | 9315694             |
| 0.414355422859017    | 4.00762309178994e-11  |                      |                     |
| 9.48470798390286e-11 | 99.6007984031936      | 99.7303621169916     |                     |
| CEBPB-regulon        | Naive IFN1            |                      |                     |
| 0.135059669499613    | -0.00812202760605582  |                      | 8768673.5           |
| 0.390024341289566    | 2.25403424924166e-17  |                      |                     |
| 6.95810572591989e-17 | 100                   | 100                  |                     |
| CEBPG-regulon        | Naive IFN1            |                      |                     |

|                            |                            |                      |
|----------------------------|----------------------------|----------------------|
| 0.0601017723832119         | -0.00804781795175567       | 9503401              |
| 0.422704496299879          | 2.52202334519271e-09       |                      |
| 5.26657816202008e-09       | 100 100                    |                      |
| CLOCK-regulon Naive IFN1   |                            |                      |
| 0.0152469692551477         | -0.000351640418092854      | 11218928.5           |
| 0.499009935560634          | 0.935252230215393          | 0.948612976361328    |
| 51.2974051896208           | 51.0908077994429           |                      |
| CREB1-regulon Naive IFN1   | 0.0471525717155813         |                      |
| 0.00422805765042012        | 13044073 0.580191060775385 |                      |
| 6.2778874932528e-10        | 1.39290628756547e-09       | 100                  |
| 99.9933147632312           |                            |                      |
| CREB3-regulon Naive IFN1   |                            |                      |
| 0.228212119695222          | -0.0117172650737974        | 8331806.5            |
| 0.370592808811347          | 1.89881809697505e-23       |                      |
| 7.09558341501202e-23       | 100 100                    |                      |
| CREB3L2-regulon Naive IFN1 |                            |                      |
| 0.124463006764658          | -0.00234003257131425       | 12277168.5           |
| 0.54607969576168           | 0.000380769544533253       | 0.000575205056635339 |
| 100                        |                            | 100                  |
| CREB3L4-regulon Naive IFN1 | 0.0139720558882236         |                      |
| 0.00290276088626535        | 12059460.5                 | 0.536396199244964    |
| 0.00064429079441482        | 0.000963045187441099       | 38.12375249501       |
| 31.2713091922006           |                            |                      |
| CREB5-regulon Naive IFN1   |                            |                      |
| 0.0344483469548989         | -0.00477872809268432       | 10267712.5           |
| 0.456700526523555          | 0.000841740884785347       | 0.00124507505874499  |
| 99.6007984031936           | 99.6233983286908           |                      |
| CREM-regulon Naive IFN1    |                            |                      |
| 0.141866227124249          | -0.0082241342250727        | 7692902              |
| 0.342174792476329          | 4.52245101357607e-34       |                      |
| 2.37847423676964e-33       | 100 100                    |                      |
| CTCF-regulon Naive IFN1    |                            |                      |
| 0.361908947225608          | -0.0090310166359987        | 8988058.5            |
| 0.39978242956983           | 1.09700815919778e-14       | 2.78169926082295e-14 |
| 100                        |                            | 100                  |
| CUX1-regulon Naive IFN1    |                            |                      |
| 0.0753347976478039         | -0.00137848785943662       | 11279008.5           |
| 0.501682251096692          | 0.896794583119493          | 0.916149861891857    |
| 100 100                    |                            |                      |
| DDIT3-regulon Naive IFN1   |                            |                      |
| 0.0829792609609404         | -0.00195040078515167       | 10906450             |
| 0.485111114817718          | 0.250953857501529          | 0.28971908752209     |
| 100                        |                            | 100                  |
| E2F1-regulon Naive IFN1    |                            |                      |
| 0.401420669303438          | -0.0366792377114666        | 6086120              |
| 0.270706275471341          | 5.96369710293208e-70       |                      |
| 2.11711247154089e-68       | 100 100                    |                      |
| E2F2-regulon Naive IFN1    |                            |                      |
| 0.0511866958044371         | -0.0027648226842           | 10513472.5           |
| 0.467631755986634          | 0.0125667548227153         | 0.017158453700246    |

|                      |       |      |                      |                   |                     |     |
|----------------------|-------|------|----------------------|-------------------|---------------------|-----|
|                      | 100   | 100  |                      |                   |                     |     |
| E2F3-regulon         | Naive | IFN1 | 0.0231124116336311   |                   |                     |     |
| 0.00201940569625499  |       |      | 12808120             | 0.569696039675524 |                     |     |
| 7.69869653664279e-08 |       |      | 1.49755466877161e-07 |                   | 100                 | 100 |
| E2F4-regulon         | Naive | IFN1 |                      |                   |                     |     |
| 0.364608364363712    |       |      | -0.0344292939198002  |                   | 6250654.5           |     |
| 0.278024652644572    |       |      | 1.13049020994773e-65 |                   |                     |     |
| 2.00662012265722e-64 |       |      | 100                  | 100               |                     |     |
| E2F6-regulon         | Naive | IFN1 |                      |                   |                     |     |
| 0.0565521084159405   |       |      | -0.0160260558925507  |                   | 7302116.5           |     |
| 0.324792932241367    |       |      | 1.37096865987794e-41 |                   | 9.7338774851334e-41 |     |
|                      | 100   | 100  |                      |                   |                     |     |
| E2F7-regulon         | Naive | IFN1 | 0.0327911936991595   |                   |                     |     |
| 0.00224191966704019  |       |      | 12983485             | 0.577496149761758 |                     |     |
| 2.29393575303604e-09 |       |      | 4.86177428255399e-09 |                   | 100                 | 100 |
| E2F8-regulon         | Naive | IFN1 |                      |                   |                     |     |
| 0.0657123089441472   |       |      | -0.00918572214723648 |                   | 7410290.5           |     |
| 0.329604434584869    |       |      | 1.97618745309857e-39 |                   |                     |     |
| 1.33627913495237e-38 |       |      | 100                  | 100               |                     |     |
| EGR1-regulon         | Naive | IFN1 | 0.0496192612667627   |                   |                     |     |
| 0.00218032628103635  |       |      | 12840227.5           | 0.5711241583685   |                     |     |
| 4.15417333053745e-08 |       |      | 8.30834666107489e-08 |                   | 100                 | 100 |
| EGR2-regulon         | Naive | IFN1 | 0.046402240825963    |                   |                     |     |
| 0.000358287989161127 |       |      | 11765928             | 0.523340083065068 |                     |     |
| 0.0719108337216335   |       |      | 0.0919940395357834   |                   | 100                 |     |
| 99.9955431754875     |       |      |                      |                   |                     |     |
| EGR3-regulon         | Naive | IFN1 | 0.041561644779481    |                   |                     |     |
| 9.15122947231645e-05 |       |      | 11666747             | 0.51892858294553  | 0.144420767116333   |     |
| 0.176790939056201    |       |      | 100                  | 99.9955431754875  |                     |     |
| ELF1-regulon         | Naive | IFN1 |                      |                   |                     |     |
| 0.690688976814782    |       |      | -0.0165382635632055  |                   | 8392255.5           |     |
| 0.373281537204143    |       |      | 1.50143307152712e-22 |                   |                     |     |
| 5.33008740392126e-22 |       |      | 100                  | 100               |                     |     |
| ELF2-regulon         | Naive | IFN1 | 0.0413629395665324   |                   |                     |     |
| 0.00880408413089159  |       |      | 14520719             | 0.64587122134561  | 2.3773154689615e-29 |     |
| 1.08896385997591e-28 |       |      | 100                  | 99.5298050139276  |                     |     |
| ELF4-regulon         | Naive | IFN1 | 0.0236278332487367   |                   |                     |     |
| 0.00523857082963682  |       |      | 14197987.5           | 0.631516354477674 |                     |     |
| 3.63902746351832e-24 |       |      | 1.43539416616556e-23 |                   | 99.4011976047904    |     |
| 98.3242339832869     |       |      |                      |                   |                     |     |
| ELK1-regulon         | Naive | IFN1 |                      |                   |                     |     |
| 0.0634367749937314   |       |      | -0.00264742678188884 |                   | 9857102             |     |
| 0.438436864432694    |       |      | 2.06509502177836e-06 |                   |                     |     |
| 3.85846701437536e-06 |       |      | 100                  | 100               |                     |     |
| ELK3-regulon         | Naive | IFN1 | 0.0678429933665993   |                   |                     |     |
| 0.00297033295221864  |       |      | 12321892             | 0.548068965133799 |                     |     |
| 0.000210182873785762 |       |      | 0.000320924387930948 |                   | 100                 | 100 |
| ELK4-regulon         | Naive | IFN1 | 0.0464802688994306   |                   |                     |     |
| 0.00149979490360286  |       |      | 11612294.5           | 0.516506574594544 |                     |     |
| 0.203091446826558    |       |      | 0.238338722722076    |                   | 96.6067864271457    |     |

96.7309192200557  
 ESRRA-regulon Naive IFN1  
 0.0761455902937064 -0.0157641888393648 6887836  
 0.30636603116886 2.08590664505122e-50 1.97465829064849e-49 100  
 100  
 ETS1-regulon Naive IFN1  
 0.24044581941792 -0.00252102119747913 11121150.5  
 0.494660839880128 0.680570376318431 0.721201443561322  
 100 100  
 ETV2-regulon Naive IFN1 0.0324514916820296  
 0.00389244268268452 13852918.5 0.616167931546378  
 3.32544936178796e-19 1.07321320312248e-18 100 100  
 ETV3-regulon Naive IFN1 0.0127034064237626  
 0.00128857816485525 12208422 0.543021900488716  
 0.000888423961134752 0.00130057940702201 87.4251497005988  
 84.3142061281337  
 ETV5-regulon Naive IFN1  
 0.0332003253893166 -0.000266256552672373 11076448.5  
 0.49267252681267 0.572075262676176 0.615414297727401 100  
 100  
 ETV6-regulon Naive IFN1 0.466828347571107  
 0.00733443253140509 12800513.5 0.569357707982364  
 8.89494664390718e-08 1.70686813977678e-07 100 100  
 ETV7-regulon Naive IFN1 0.0644485089110703  
 0.000376587358105099 12112320.5 0.538747374332116  
 0.00281092455237525 0.00399151286437285 100 100  
 FLI1-regulon Naive IFN1 0.156950679966518  
 0.0131645148326803 14394616.5 0.640262272113155  
 2.91649966263653e-27 1.18326557741253e-26 100 100  
 FOS-regulon Naive IFN1 0.0935195298294603  
 0.00732285744874943 14909916 0.663182426233883  
 2.63534268431649e-36 1.55924442155393e-35 100 100  
 FOSB-regulon Naive IFN1 0.0476746606561959  
 0.00627041084343027 13365391.5 0.594483078411422  
 3.20939283930012e-13 7.99532952948452e-13 99.4011976047904  
 99.3225626740947  
 FOSL1-regulon Naive IFN1  
 0.0510675691147821 -0.0098347234793657 9171648.5  
 0.407948381787956 1.26737528735081e-12 3.1028843242037e-12  
 100 100  
 FOX01-regulon Naive IFN1 0.0237886760620389  
 0.0071708650565905 12961080.5 0.576499613586198  
 4.20047159798328e-10 9.62043495021976e-10 62.4750499001996  
 52.2295264623955  
 FOX03-regulon Naive IFN1 0.0235981239491461  
 0.00389724101074796 12245577.5 0.544674550620208  
 0.00018525865734411 0.000285942710248518 54.4910179640719  
 46.6740947075209  
 GABPA-regulon Naive IFN1 0.0284095897498511  
 0.00295428119545145 13510132 0.600921032586637

|                       |                       |                    |     |
|-----------------------|-----------------------|--------------------|-----|
| 7.15468146828808e-15  | 1.88141623795724e-14  | 100                | 100 |
| GTF2B-regulon         | Naive IFN1            |                    |     |
| 0.0712170650086452    | -0.00792744309719504  | 8775040.5          |     |
| 0.390307540907044     | 2.71873134880081e-17  |                    |     |
| 8.21403939424926e-17  | 100                   | 100                |     |
| HINFP-regulon         | Naive IFN1            | 0.0183841701759869 |     |
| 0.0021776678793136    | 11873045.5            | 0.528104593042328  |     |
| 0.0262155608599108    | 0.0344686077972902    | 65.4690618762475   |     |
| 63.2089136490251      |                       |                    |     |
| HIVEP3-regulon        | Naive IFN1            | 0.0788060081579512 |     |
| 0.00113052290729318   | 11584194.5            | 0.515256706642426  |     |
| 0.239436150085392     | 0.278687977968243     | 100                |     |
| 99.6902506963788      |                       |                    |     |
| HOXB2-regulon         | Naive IFN1            | 0.0421326568895146 |     |
| 0.00508608826735026   | 12557190              | 0.558534852300969  |     |
| 6.09121706546569e-06  | 1.09487699151409e-05  | 89.0219560878243   |     |
| 83.6701949860724      |                       |                    |     |
| IKZF1-regulon         | Naive IFN1            |                    |     |
| 0.141675358931559     | -0.00221321036235919  | 9865231            |     |
| 0.438798436553078     | 2.36928224236357e-06  |                    |     |
| 4.31330869763625e-06  | 100                   | 100                |     |
| IRF1-regulon          | Naive IFN1            | 0.147737741590395  |     |
| 0.0124325667295036    | 16263840.5            | 0.723404022039487  |     |
| 1.69435012421749e-66  | 4.00996196064806e-65  | 100                | 100 |
| IRF2-regulon          | Naive IFN1            | 0.099607226426529  |     |
| 0.0147496571238016    | 15947484              | 0.709332710623322  |     |
| 1.31359510850403e-58  | 1.86530505407573e-57  | 100                | 100 |
| IRF3-regulon          | Naive IFN1            | 0.146015659048124  |     |
| 0.000575484199229759  | 11617274.5            | 0.516728081441574  |     |
| 0.197102561383761     | 0.234471503648409     | 100                | 100 |
| IRF4-regulon          | Naive IFN1            | 0.0622722675004607 |     |
| 0.00390301088907113   | 13287350.5            | 0.591011870409599  |     |
| 2.25628683238479e-12  | 5.43038525760408e-12  | 100                |     |
| 99.9955431754875      |                       |                    |     |
| IRF5-regulon          | Naive IFN1            | 0.0521436195911608 |     |
| 0.00515578870709942   | 12341987.5            | 0.54896279863671   |     |
| 0.00015095376657815   | 0.000238171498378859  | 90.0199600798403   |     |
| 80.3721448467967      |                       |                    |     |
| IRF7-regulon          | Naive IFN1            | 0.126589627327793  |     |
| 0.0189643186518363    | 18199952              | 0.809520880245081  |     |
| 6.87125681511335e-126 | 3.25239489248699e-124 | 100                | 100 |
| IRF8-regulon          | Naive IFN1            | 0.0818898662693873 |     |
| 0.000118247223352144  | 11763769.5            | 0.523244074525045  |     |
| 0.0730882484441049    | 0.0926654578487759    | 100                | 100 |
| IRF9-regulon          | Naive IFN1            | 0.0569242555372054 |     |
| 0.023264904047775     | 19873437.5            | 0.883956321340606  |     |
| 1.26123811767236e-192 | 1.79095812709475e-190 | 100                | 100 |
| JUN-regulon           | Naive IFN1            | 0.0978800288016969 |     |
| 0.00958558061733203   | 14958211              | 0.665330553377924  |     |
| 3.19264291842473e-37  | 1.97110997572309e-36  | 100                | 100 |



JUNB-regulon Naive IFN1 0.170639218711156  
 0.0109779362099912 14438749.5 0.642225276466565  
 5.53358832696875e-28 2.31108688949871e-27 100 100  
 JUND-regulon Naive IFN1 0.0446409224475277  
 0.00625226646644794 14738050.5 0.655537971410939  
 3.86338534023052e-33 1.89172661487149e-32 100 100  
 KLF11-regulon Naive IFN1 0.0252976280940657  
 0.00339866516042946 11685416.5 0.519758988985817  
 0.0871299132461617 0.109441279188305 43.5129740518962  
 40.8289693593315  
 KLF12-regulon Naive IFN1 0.0474200432827046  
 0.000374553916624373 11345387 0.504634719419101  
 0.720816234673969 0.752616950909585 99.4011976047904  
 98.5938718662953  
 KLF13-regulon Naive IFN1 0.0685803894799454  
 0.00231383799328355 13662016 0.607676724545338  
 1.01833417834643e-16 2.95109088418761e-16 100 100  
 KLF2-regulon Naive IFN1 0.123027850668578  
 0.0143377882385458 15186841.5 0.675499874902007  
 1.00863338055317e-41 7.53820737044998e-41 100 100  
 KLF3-regulon Naive IFN1 0.0958553469517124  
 0.0240921328361479 15718110 0.699130318749687  
 3.31258563827298e-53 4.27624691486148e-52 100  
 99.8618384401114  
 KLF4-regulon Naive IFN1 0.0162782810157839  
 0.000382714982360911 11414752.5 0.50772004737044  
 0.524201870367065 0.568218821313917 52.2954091816367  
 49.7849582172702  
 KLF6-regulon Naive IFN1 0.0753998869706235  
 0.00608721945869813 12832166.5 0.570765610839602  
 4.85549713223121e-08 9.57611934412267e-08 100 100  
 KLF7-regulon Naive IFN1 0.0575431334604247  
 0.0116732811351785 14146529 0.629227517110626  
 2.18147336803281e-23 7.94280046822201e-23 99.8003992015968  
 97.5309192200557  
 KLF8-regulon Naive IFN1 0.0368891845937754  
 0.0119140043628848 14535325 0.646520885804992  
 6.50127634302419e-30 3.07727080236478e-29 92.4151696606786  
 77.4707520891365  
 MAFB-regulon Naive IFN1 0.0583707154161183  
 0.00261670124314848 12521222 0.556935021322258  
 1.133045132684e-05 1.98632603507566e-05 100  
 99.9977715877437  
 MAFF-regulon Naive IFN1 0.0170152644513567  
 0.00467999586829322 12128744.5 0.53947790213445  
 0.000133753887655506 0.000213405079180694 35.5289421157685  
 28.4679665738162  
 MAFG-regulon Naive IFN1  
 0.0247864119939077 -0.000627873068032494 10985030  
 0.488606297154994 0.36205210136131 0.401436155330729

56.4870259481038 58.625069637883  
MAX-regulon Naive IFN1 0.200993640427255  
0.00336053438286421 12536629.5 0.557620335929812  
8.87421450222239e-06 1.57517307414447e-05 100 100  
MAZ-regulon Naive IFN1  
0.127416159815879 -0.00898687813150084 7576213  
0.336984549007834 3.10167020741339e-36  
1.76174867781081e-35 100 100  
MEF2A-regulon Naive IFN1 0.0455508157711157  
0.00485005029762512 13159185 0.585311160408987  
4.76541439509784e-11 1.10932597394081e-10 100  
99.9977715877437  
MLX-regulon Naive IFN1 0.0532337202938423  
0.000311704062531441 11531831 0.512927615521047  
0.318857691928818 0.362222338031137 100  
99.9888579387187  
MXD4-regulon Naive IFN1  
0.0665118098078265 -0.0259437669112842 10070327  
0.447920960307797 5.85369347710381e-05 9.4457326562357e-05  
85.2295409181637 88.641782729805  
MXI1-regulon Naive IFN1 0.0793851300468729  
0.0143136162403922 15370638 0.683675012092806  
1.56045965654465e-45 1.3034427719373e-44 100 100  
MYBL1-regulon Naive IFN1  
0.0228070954497166 -0.00716220191079708 10745509  
0.477952573960714 0.0878613086441325 0.109441279188305  
82.0359281437126 80.0378830083565  
MYC-regulon Naive IFN1  
0.279350390128833 -0.0359280534414024 6932123  
0.308335885332399 2.01176064694486e-49  
1.78543757416356e-48 100 100  
NFATC1-regulon Naive IFN1  
0.044578558057086 -0.00600559231364613 10555757  
0.469512540378852 0.0187251574269215 0.0253235462345034  
93.4131736526946 94.8434540389972  
NFE2L1-regulon Naive IFN1  
0.138867398952806 -0.0442887390529477 7708908.5  
0.342886750176527 8.84692786640522e-34  
4.48665627510551e-33 100 99.9353760445682  
NFE2L2-regulon Naive IFN1  
0.101472353501049 -0.00951321120902889 8889571.5  
0.395401798075159 7.30848006641353e-16  
1.99577724890523e-15 100 100  
NFKB1-regulon Naive IFN1  
0.050179046584365 -0.00656220387709086 10283921.5  
0.45742149127928 0.00102672393042913 0.00148770202164221 100  
99.9309192200557  
NFKB2-regulon Naive IFN1  
0.0716851332340194 -0.00171034374683517 10969399.5  
0.487911063666539 0.35126420510914 0.392752103350377 100

100

NFYA-regulon Naive IFN1 0.0231449868851658  
0.00222110418283695 12623511 0.5614847630644  
2.12763965666133e-06 3.92369910708973e-06 99.2015968063872  
99.0150417827298

NFYB-regulon Naive IFN1  
0.0952108317228007 -0.0135638242447641 6806279  
0.302738433995519 3.02401845933643e-52  
3.30315862481364e-51 100 100

NFYC-regulon Naive IFN1  
0.0771026680628007 -0.00650388055022973 8288042.5  
0.368646217314674 4.13801955050394e-24  
1.58810480046367e-23 100 100

NR1H3-regulon Naive IFN1 0.015085902644795  
0.0066246577566791 12522457.5 0.556989975480793  
1.437423551684e-09 3.09263855059285e-09 31.936127744511  
21.9944289693593

NR2C2-regulon Naive IFN1 0.0232614160862448  
0.00149171778342806 11772961.5 0.523652928127033  
0.0662722243456105 0.0855514168825154 77.8443113772455  
75.9576601671309

NR3C1-regulon Naive IFN1 0.227545995113998  
0.00209150220338442 11616401 0.51668922878477 0.198144932660627  
0.234471503648409 100 100

NRF1-regulon Naive IFN1  
0.0257875500565671 -0.0009521284285278 10846818.5  
0.482458748241678 0.176198886318914 0.213848221002442  
99.8003992015968 99.9688022284123

PAX5-regulon Naive IFN1 0.105982221835035  
0.00577834191533831 13041672.5 0.580084288248016  
6.61392570825917e-10 1.44488838549662e-09 100 100

POU2F1-regulon Naive IFN1 0.00611040362713486  
0.00124415961935388 11983777 0.533029851161187  
0.000161165289373144 0.000251488693307544 24.750499001996  
18.275208913649

POU6F1-regulon Naive IFN1 0.0372461892011825  
0.00631377017131926 12397089 0.551413674044668  
5.13380663647458e-05 8.37931657907345e-05 71.2574850299401  
65.2880222841226

REL-regulon Naive IFN1  
0.253873846022881 -0.00994797234567257 8409510.5  
0.374049027293602 2.6881459148731e-22  
9.31016390029221e-22 100 100

RELA-regulon Naive IFN1 0.0947140104918501  
0.00267912930525634 12685294.5 0.564232849065101  
7.31528140391184e-07 1.38502661247398e-06 100 100

RELB-regulon Naive IFN1  
0.0965733548738974 -0.00870645257023787 7491761.5  
0.333228206539567 7.62921827627088e-38  
4.92431361468393e-37 100 100

|                      |                       |                     |     |     |
|----------------------|-----------------------|---------------------|-----|-----|
| REST-regulon         | Naive IFN1            | 0.220639063526179   |     |     |
| 0.00204315002520852  | 11971916.5            | 0.532502304583034   |     |     |
| 0.0122052581955417   | 0.016826666385139     | 100                 | 100 |     |
| RFX5-regulon         | Naive IFN1            |                     |     |     |
| 0.0631984905351351   | -0.00217398711627172  | 11244739            |     |     |
| 0.50015796818619     | 0.990283012569109     | 0.990283012569109   |     | 100 |
|                      | 100                   |                     |     |     |
| RXRA-regulon         | Naive IFN1            | 0.0154786072949745  |     |     |
| 0.00095905755759744  | 11875506.5            | 0.528214056566533   |     |     |
| 0.0259531323961909   | 0.0344424747687768    | 70.6586826347305    |     |     |
| 64.191643454039      |                       |                     |     |     |
| SETDB1-regulon       | Naive IFN1            |                     |     |     |
| 0.0583490630510343   | -0.00138374186988515  | 11123661.5          |     |     |
| 0.494772527368661    | 0.686876126334569     | 0.722491925477843   |     |     |
|                      | 92.6147704590818      | 95.0796657381616    |     |     |
| SOX5-regulon         | Naive IFN1            | 0.00995689720497441 |     |     |
| 0.00217763714713767  | 11787561              | 0.524302303471052   |     |     |
| 0.0103676792747617   | 0.0144334358530997    | 26.9461077844311    |     |     |
| 22.4445682451253     |                       |                     |     |     |
| SP1-regulon          | Naive IFN1            | 0.0155591962956732  |     |     |
| 0.00259396271354003  | 12441678.5            | 0.55339698319239    |     |     |
| 2.06575197931837e-05 | 3.45102095368481e-05  | 69.061876247505     |     |     |
| 59.7192200557103     |                       |                     |     |     |
| SP2-regulon          | Naive IFN1            | 0.0286306251853698  |     |     |
| 0.000394827454195019 | 11527619              | 0.512740268766089   |     |     |
| 0.325921407983944    | 0.367308253442223     | 100                 | 100 |     |
| SP3-regulon          | Naive IFN1            | 0.0324622882160987  |     |     |
| 0.00423919317385509  | 14461180.5            | 0.643222991343219   |     |     |
| 2.35686032050893e-28 | 1.01416413791596e-27  | 100                 | 100 |     |
| SP4-regulon          | Naive IFN1            | 0.0113643342403459  |     |     |
| 0.00275684850815446  | 12205421              | 0.542888418149773   |     |     |
| 3.68694800296185e-05 | 6.08775135372771e-05  | 37.125748502994     |     |     |
| 28.924791086351      |                       |                     |     |     |
| SPI1-regulon         | Naive IFN1            |                     |     |     |
| 0.417681424355669    | -0.000871172014814847 | 10753221            |     |     |
| 0.478295598218605    | 0.0942171695684866    | 0.116337722423696   |     |     |
|                      | 100                   | 100                 |     |     |
| SPIB-regulon         | Naive IFN1            |                     |     |     |
| 0.544374764535341    | -0.020300596021105    | 6859456             |     |     |
| 0.305103709016507    | 4.82284553335453e-51  |                     |     |     |
| 4.89174332668816e-50 | 100                   | 100                 |     |     |
| SREBF1-regulon       | Naive IFN1            |                     |     |     |
| 0.0404196761874689   | -0.000515900000621732 | 11106527.5          |     |     |
| 0.494010419272875    | 0.644193242832584     | 0.687785266783662   |     |     |
|                      | 97.2055888223553      | 96.891364902507     |     |     |
| SREBF2-regulon       | Naive IFN1            | 0.101845274167912   |     |     |
| 0.0028945996657916   | 12519003              | 0.556836321785399   |     |     |
| 1.17337671073101e-05 | 2.03194503565614e-05  | 100                 | 100 |     |
| SRF-regulon          | Naive IFN1            | 0.022570302729831   |     |     |
| 0.00182123496967643  | 12125153              | 0.539318154776797   |     |     |

|                           |                       |                            |
|---------------------------|-----------------------|----------------------------|
| 0.00243167091843246       | 0.00348785121633747   | 98.8023952095808           |
| 97.925348189415           |                       |                            |
| STAT1-regulon Naive IFN1  | 0.10094247672537      | 0.021410359954294          |
| 19499801                  | 0.867337236390728     | 1.73677273768196e-176      |
| 1.23310864375419e-174     | 100                   | 100                        |
| STAT2-regulon Naive IFN1  | 0.0824905219472696    |                            |
| 0.0164376567695997        | 15695421.5            | 0.698121150456747          |
| 1.09628725817242e-52      | 1.29727325550403e-51  | 100                        |
| 99.9621169916435          |                       |                            |
| STAT5A-regulon Naive IFN1 |                       |                            |
| 0.0628625948206457        | -0.00884286833975363  | 8427916.5                  |
| 0.374867713041883         | 4.98439420701723e-22  |                            |
| 1.68519994618202e-21      | 100                   | 100                        |
| TBP-regulon Naive IFN1    |                       |                            |
| 0.0202489311935767        | -0.000659616939511717 | 11231056                   |
| 0.499549358108296         | 0.970354829321867     | 0.977236778465994          |
| 50.0998003992016          | 49.883008356546       |                            |
| TCF12-regulon Naive IFN1  | 0.0102192495780039    |                            |
| 0.00118866035548445       | 11479705.5            | 0.510609110469868          |
| 0.28352276148453          | 0.324679291377446     | 26.9461077844311           |
| 25.2011142061281          |                       |                            |
| TFDP1-regulon Naive IFN1  |                       |                            |
| 0.497849032248096         | -0.0306527090266784   | 6226154                    |
| 0.276934887884398         | 2.66078733606486e-66  |                            |
| 5.39759716744585e-65      | 100                   | 100                        |
| TFDP2-regulon Naive IFN1  |                       |                            |
| 0.0269199868786721        | -0.000205435065983271 | 11631837                   |
| 0.517375811051991         | 0.180311984525167     | 0.216985608496387          |
| 100                       | 99.9955431754875      |                            |
| TFEC-regulon Naive IFN1   |                       |                            |
| 0.0849574459362756        | -0.00665760661365732  | 9565140                    |
| 0.425450602972328         | 9.01563997839502e-09  | 1.8553925752639e-08        |
| 100                       | 100                   |                            |
| THAP1-regulon Naive IFN1  |                       |                            |
| 0.0371382098658062        | -2.72035281492847e-05 | 11308848                   |
| 0.503009490767768         | 0.816498319936261     | 0.840164937905428          |
| 100                       | 100                   |                            |
| THAP11-regulon Naive IFN1 |                       |                            |
| 0.17763114224884          | -0.000856019066743319 | 10579299 0.470559671742865 |
| 0.0232043173925685        | 0.0310850289598559    | 100 100                    |
| TP53-regulon Naive IFN1   |                       |                            |
| 0.0876867162577296        | -0.0107890992105733   | 7974475                    |
| 0.354698958628704         | 3.90935778191876e-29  |                            |
| 1.73477751572645e-28      | 100                   | 100                        |
| USF2-regulon Naive IFN1   | 0.130818728555648     |                            |
| 0.00559429044882201       | 13693459.5            | 0.609075308992044          |
| 4.08376008798775e-17      | 1.20811235936304e-16  | 100 100                    |
| XBP1-regulon Naive IFN1   | 0.195954575124487     |                            |
| 0.000672129523542786      | 13495949.5            | 0.60029020510511           |
| 1.04978983017553e-14      | 2.710366470635e-14    | 100 100                    |

|                      |                      |                    |     |                  |
|----------------------|----------------------|--------------------|-----|------------------|
| YBX1-regulon         | Naive IFN1           |                    |     |                  |
| 0.0910038569115036   | -0.00422657098213518 |                    |     | 8742689          |
| 0.388868569268149    | 1.04378505650107e-17 |                    |     |                  |
| 3.29372173384782e-17 | 100                  | 100                |     |                  |
| YY1-regulon          | Naive IFN1           |                    |     |                  |
| 0.609010231162041    | -0.0308011793022795  |                    |     | 6165905          |
| 0.274255055348912    | 7.36325581534074e-68 |                    |     |                  |
| 2.09116465155677e-66 | 100                  | 100                |     |                  |
| YY2-regulon          | Naive IFN1           | 0.0707218609643046 |     |                  |
| 0.0199399627035918   | 14844763.5           | 0.660284489516788  |     |                  |
| 4.07708575581619e-35 | 2.22671606663807e-34 |                    |     | 98.0039920159681 |
| 90.4467966573816     |                      |                    |     |                  |
| ZBTB33-regulon       | Naive IFN1           | 0.367037834314061  |     |                  |
| 0.00122534974047944  | 11456149.5           | 0.509561356395843  |     |                  |
| 0.460972831208879    | 0.503524169474314    |                    | 100 | 100              |
| ZNF143-regulon       | Naive IFN1           | 0.0268325813162046 |     |                  |
| 0.00354094129200605  | 13884347.5           | 0.617565871043428  |     |                  |
| 1.24432325701212e-19 | 4.1091605231563e-19  |                    | 100 |                  |
| 99.9933147632312     |                      |                    |     |                  |
| ZNF274-regulon       | Naive IFN1           | 0.0709673433102925 |     |                  |
| 0.00568862104542152  | 13642336             | 0.60680137218599   |     |                  |
| 1.79358826911853e-16 | 5.09379068429663e-16 |                    | 100 | 100              |
| ZNF76-regulon        | Naive IFN1           | 0.0164997822877186 |     |                  |
| 0.00196436433926987  | 12913560.5           | 0.574385957889235  |     |                  |
| 9.71233407546092e-09 | 1.97021634102207e-08 |                    |     | 99.6007984031936 |
| 99.458495821727      |                      |                    |     |                  |
