# Supplementary material for: Distinct stage-specific transcriptional states of B cells derived from human tonsillar tissue
Source: PubMed Central journal article supplement (PMC10132144; doi:10.1172/jci.insight.155199), 2023-04-10
Supplement: jciinsight-8-155199-s233.pdf [file jciinsight-8-155199-s233.pdf]

| TF     | Targets  |
|--------|----------|
| ARID3A | AHNAK    |
| ARID3A | ARID3A   |
| ARID3A | CLDN14   |
| ARID3A | LMNA     |
| ARID3A | TCF4     |
| ATF1   | AAAS     |
| ATF1   | AAMP     |
| ATF1   | AATF     |
| ATF1   | ABCC4    |
| ATF1   | ABCE1    |
| ATF1   | ACIN1    |
| ATF1   | ACY3     |
| ATF1   | ADSL     |
| ATF1   | AMPD3    |
| ATF1   | ANAPC10  |
| ATF1   | ANAPC2   |
| ATF1   | ANKH     |
| ATF1   | ANKHD1   |
| ATF1   | ANXA5    |
| ATF1   | AP5S1    |
| ATF1   | APTX     |
| ATF1   | ARHGEF2  |
| ATF1   | ARL2     |
| ATF1   | ATF1     |
| ATF1   | ATF3     |
| ATF1   | ATL3     |
| ATF1   | ATP1B3   |
| ATF1   | ATP2A3   |
| ATF1   | B3GALNT1 |
| ATF1   | BCL11A   |
| ATF1   | BDP1     |
| ATF1   | BIRC2    |
| ATF1   | BLCAP    |
| ATF1   | BL0C1S2  |
| ATF1   | BL0C1S4  |
| ATF1   | BPTF     |
| ATF1   | BRAF     |
| ATF1   | BUB1B    |
| ATF1   | C12orf49 |
| ATF1   | C20orf27 |
| ATF1   | C2orf49  |
| ATF1   | C3orf38  |
| ATF1   | CAMK1D   |
| ATF1   | CAPNS1   |
| ATF1   | CASD1    |
| ATF1   | CBFA2T2  |
| ATF1   | CC2D1B   |
| ATF1   | CCAR1    |
| ATF1   | CCAR2    |

|      |         |
|------|---------|
| ATF1 | CCDC189 |
| ATF1 | CCDC59  |
| ATF1 | CCT2    |
| ATF1 | CCT7    |
| ATF1 | CD47    |
| ATF1 | CD82    |
| ATF1 | CDC16   |
| ATF1 | CDC23   |
| ATF1 | CDC5L   |
| ATF1 | CDCA5   |
| ATF1 | CDK4    |
| ATF1 | CEP112  |
| ATF1 | CEP120  |
| ATF1 | CHD1    |
| ATF1 | CHD6    |
| ATF1 | CHEK1   |
| ATF1 | CIR1    |
| ATF1 | CMSS1   |
| ATF1 | CMTM7   |
| ATF1 | CNTR0B  |
| ATF1 | COA1    |
| ATF1 | COMMD2  |
| ATF1 | CRLF3   |
| ATF1 | CSNK1A1 |
| ATF1 | CTPS1   |
| ATF1 | CUX1    |
| ATF1 | CWC15   |
| ATF1 | CXXC1   |
| ATF1 | CYHR1   |
| ATF1 | DBNL    |
| ATF1 | DCAKD   |
| ATF1 | DCUN1D5 |
| ATF1 | DDX18   |
| ATF1 | DDX21   |
| ATF1 | DDX5    |
| ATF1 | DEPDC5  |
| ATF1 | DGKD    |
| ATF1 | DHX37   |
| ATF1 | DNAJC14 |
| ATF1 | DPM1    |
| ATF1 | DTL     |
| ATF1 | E2F8    |
| ATF1 | EDRF1   |
| ATF1 | EIF2S1  |
| ATF1 | EIF3I   |
| ATF1 | EIF5AL1 |
| ATF1 | EIF6    |
| ATF1 | ELP5    |
| ATF1 | EMP3    |
| ATF1 | EPB41L2 |

|      |         |
|------|---------|
| ATF1 | ERF     |
| ATF1 | ERI2    |
| ATF1 | EYA3    |
| ATF1 | FAM122B |
| ATF1 | FAM168B |
| ATF1 | FAM234A |
| ATF1 | FANCD2  |
| ATF1 | FBX022  |
| ATF1 | FDXR    |
| ATF1 | FIP1L1  |
| ATF1 | FOSL1   |
| ATF1 | FZD3    |
| ATF1 | GABPA   |
| ATF1 | GABPB1  |
| ATF1 | GAPVD1  |
| ATF1 | GAR1    |
| ATF1 | GCAT    |
| ATF1 | GCC2    |
| ATF1 | GEM     |
| ATF1 | GL0D4   |
| ATF1 | GNL2    |
| ATF1 | GOLGA3  |
| ATF1 | GPATCH4 |
| ATF1 | GPN1    |
| ATF1 | GPR160  |
| ATF1 | GPS2    |
| ATF1 | GTF2H1  |
| ATF1 | GTF2H3  |
| ATF1 | GTPBP10 |
| ATF1 | GTPBP4  |
| ATF1 | HAUS5   |
| ATF1 | HGH1    |
| ATF1 | HGS     |
| ATF1 | HIP1R   |
| ATF1 | HMGCR   |
| ATF1 | HMGCS1  |
| ATF1 | HMOX2   |
| ATF1 | HNRNPC  |
| ATF1 | HNRNPU  |
| ATF1 | HOMEZ   |
| ATF1 | IDH3G   |
| ATF1 | IFT20   |
| ATF1 | IKBKB   |
| ATF1 | ILF2    |
| ATF1 | ILF3    |
| ATF1 | IMPDH2  |
| ATF1 | INF2    |
| ATF1 | IN080D  |
| ATF1 | INSIG2  |
| ATF1 | INTS10  |

|      |           |
|------|-----------|
| ATF1 | IP04      |
| ATF1 | IRF5      |
| ATF1 | IRS1      |
| ATF1 | ISG20L2   |
| ATF1 | ITPK1     |
| ATF1 | JKAMP     |
| ATF1 | KBTBD4    |
| ATF1 | KCNAB2    |
| ATF1 | KCTD6     |
| ATF1 | KDSR      |
| ATF1 | KIAA0319L |
| ATF1 | KLHL7     |
| ATF1 | LACTB     |
| ATF1 | LCLAT1    |
| ATF1 | LMCD1     |
| ATF1 | LRPPRC    |
| ATF1 | LRRC47    |
| ATF1 | LUZP1     |
| ATF1 | LZIC      |
| ATF1 | M6PR      |
| ATF1 | MAD2L2    |
| ATF1 | MAG0H     |
| ATF1 | MBD6      |
| ATF1 | MBIP      |
| ATF1 | MDM4      |
| ATF1 | MED7      |
| ATF1 | METTLL13  |
| ATF1 | MFN2      |
| ATF1 | MFSD10    |
| ATF1 | MITD1     |
| ATF1 | MLST8     |
| ATF1 | MORF4L1   |
| ATF1 | MPHOSPH8  |
| ATF1 | MRPL3     |
| ATF1 | MRPS10    |
| ATF1 | MRPS26    |
| ATF1 | MRPS6     |
| ATF1 | MRRF      |
| ATF1 | MT2A      |
| ATF1 | MTA2      |
| ATF1 | MVB12A    |
| ATF1 | MYL12A    |
| ATF1 | MYO9B     |
| ATF1 | NAA20     |
| ATF1 | NAA40     |
| ATF1 | NAA50     |
| ATF1 | NAXE      |
| ATF1 | NCBP2     |
| ATF1 | NCDN      |
| ATF1 | NDFIP2    |

|      |         |
|------|---------|
| ATF1 | NDUFA10 |
| ATF1 | NDUFB7  |
| ATF1 | NETO2   |
| ATF1 | NFKBIZ  |
| ATF1 | NGDN    |
| ATF1 | NIP7    |
| ATF1 | NOL11   |
| ATF1 | NOLC1   |
| ATF1 | NOP2    |
| ATF1 | NOP58   |
| ATF1 | NPL0C4  |
| ATF1 | NPM1    |
| ATF1 | NR1H2   |
| ATF1 | NRP2    |
| ATF1 | NUDC    |
| ATF1 | NUFIP1  |
| ATF1 | NUMBL   |
| ATF1 | NUP107  |
| ATF1 | NUP54   |
| ATF1 | NXF1    |
| ATF1 | OAT     |
| ATF1 | ODC1    |
| ATF1 | ORC2    |
| ATF1 | ORMDL1  |
| ATF1 | PABPC1  |
| ATF1 | PABPC4  |
| ATF1 | PARM1   |
| ATF1 | PARVB   |
| ATF1 | PATL1   |
| ATF1 | PATZ1   |
| ATF1 | PCBP1   |
| ATF1 | PCGF1   |
| ATF1 | PDCD11  |
| ATF1 | PDSS1   |
| ATF1 | PFDN2   |
| ATF1 | PGM2    |
| ATF1 | PHF20   |
| ATF1 | PHF5A   |
| ATF1 | PICK1   |
| ATF1 | PLEKHA1 |
| ATF1 | PMAIP1  |
| ATF1 | PN01    |
| ATF1 | PNP0    |
| ATF1 | PNPT1   |
| ATF1 | POC1B   |
| ATF1 | POLDIP3 |
| ATF1 | POLR2H  |
| ATF1 | POLR2K  |
| ATF1 | POLR3H  |
| ATF1 | PPA1    |

|      |         |
|------|---------|
| ATF1 | PPIL1   |
| ATF1 | PPIL2   |
| ATF1 | PPM1A   |
| ATF1 | PPP1R11 |
| ATF1 | PPP1R37 |
| ATF1 | PPP3R1  |
| ATF1 | PREPL   |
| ATF1 | PRPF18  |
| ATF1 | PSMA6   |
| ATF1 | PSMG4   |
| ATF1 | PTGES3  |
| ATF1 | PUF60   |
| ATF1 | RAB7A   |
| ATF1 | RAD23A  |
| ATF1 | RAN     |
| ATF1 | RBM22   |
| ATF1 | RBM25   |
| ATF1 | RBM8A   |
| ATF1 | RBPJ    |
| ATF1 | REL     |
| ATF1 | RER1    |
| ATF1 | RFX7    |
| ATF1 | RFXAP   |
| ATF1 | RIC1    |
| ATF1 | RING1   |
| ATF1 | RNF139  |
| ATF1 | RNF4    |
| ATF1 | RNPS1   |
| ATF1 | RPL18A  |
| ATF1 | RPL21   |
| ATF1 | RPL23A  |
| ATF1 | RPL38   |
| ATF1 | RPRD1A  |
| ATF1 | RPS10   |
| ATF1 | RPS17   |
| ATF1 | RPS21   |
| ATF1 | RPS27   |
| ATF1 | RPS27A  |
| ATF1 | RPS29   |
| ATF1 | RPS3A   |
| ATF1 | RPS6KA5 |
| ATF1 | RPS6KB2 |
| ATF1 | RSF1    |
| ATF1 | RSL1D1  |
| ATF1 | SAFB    |
| ATF1 | SCAF11  |
| ATF1 | SCNM1   |
| ATF1 | SC01    |
| ATF1 | SCYL3   |
| ATF1 | SDCBP   |

|      |             |
|------|-------------|
| ATF1 | SEPT7       |
| ATF1 | SERPINE2    |
| ATF1 | SET         |
| ATF1 | SETD4       |
| ATF1 | SF3A3       |
| ATF1 | SF3B2       |
| ATF1 | SFXN1       |
| ATF1 | SIKE1       |
| ATF1 | SIN3A       |
| ATF1 | SLC16A1     |
| ATF1 | SLC35F6     |
| ATF1 | SLC39A6     |
| ATF1 | SLC46A3     |
| ATF1 | SLC4A8      |
| ATF1 | SLMAP       |
| ATF1 | SLU7        |
| ATF1 | SMIM14      |
| ATF1 | SMYD3       |
| ATF1 | SNF8        |
| ATF1 | SNHG15      |
| ATF1 | SNW1        |
| ATF1 | SOAT1       |
| ATF1 | SP110       |
| ATF1 | SRFBP1      |
| ATF1 | SRSF5       |
| ATF1 | SRSF6       |
| ATF1 | STAU1       |
| ATF1 | STK26       |
| ATF1 | STYXL1      |
| ATF1 | SZRD1       |
| ATF1 | TAF2        |
| ATF1 | TBC1D7      |
| ATF1 | TBC1D9B     |
| ATF1 | TCEA2       |
| ATF1 | TCOF1       |
| ATF1 | TCP1        |
| ATF1 | TCP11L1     |
| ATF1 | TFE3        |
| ATF1 | THRAP3      |
| ATF1 | TIAL1       |
| ATF1 | TIMM17A     |
| ATF1 | TIMM22      |
| ATF1 | TLE3        |
| ATF1 | TM2D3       |
| ATF1 | TMEM147-AS1 |
| ATF1 | TMEM237     |
| ATF1 | TMEM242     |
| ATF1 | TMEM33      |
| ATF1 | TMUB1       |
| ATF1 | TNFAIP8     |

|      |           |
|------|-----------|
| ATF1 | TOMM40    |
| ATF1 | TPR       |
| ATF1 | TRIP6     |
| ATF1 | TRMT112   |
| ATF1 | TSR2      |
| ATF1 | TTC17     |
| ATF1 | TUFM      |
| ATF1 | TWISTNB   |
| ATF1 | U2SURP    |
| ATF1 | UBAC2-AS1 |
| ATF1 | UBC       |
| ATF1 | UBE2K     |
| ATF1 | UBE2N     |
| ATF1 | UBE2V2    |
| ATF1 | UBL7      |
| ATF1 | UBR5      |
| ATF1 | UBXN1     |
| ATF1 | USB1      |
| ATF1 | USP16     |
| ATF1 | USP30     |
| ATF1 | UTP18     |
| ATF1 | UTP3      |
| ATF1 | UTP6      |
| ATF1 | VAC14     |
| ATF1 | VDAC1     |
| ATF1 | VPS4B     |
| ATF1 | VRK2      |
| ATF1 | WBP11     |
| ATF1 | WDR12     |
| ATF1 | WDR18     |
| ATF1 | WDR74     |
| ATF1 | WDR75     |
| ATF1 | WDR83     |
| ATF1 | WRAP73    |
| ATF1 | XP07      |
| ATF1 | XRCC6     |
| ATF1 | YBX1      |
| ATF1 | YRDC      |
| ATF1 | ZC3H18    |
| ATF1 | ZFP36     |
| ATF1 | ZMYND19   |
| ATF1 | ZMYND8    |
| ATF1 | ZNF263    |
| ATF1 | ZNF408    |
| ATF1 | ZNF551    |
| ATF1 | ZNRD1     |
| ATF1 | ZPR1      |
| ATF1 | ZRANB3    |
| ATF1 | ZSCAN16   |
| ATF1 | ZSWIM7    |



|      |           |
|------|-----------|
| ATF2 | ATF2      |
| ATF2 | C14orf28  |
| ATF2 | FOXN2     |
| ATF2 | SLC46A3   |
| ATF3 | ABCE1     |
| ATF3 | ACTA2     |
| ATF3 | ADGRE5    |
| ATF3 | AEN       |
| ATF3 | AIMP1     |
| ATF3 | AKIRIN1   |
| ATF3 | ANKRA2    |
| ATF3 | ARL4A     |
| ATF3 | ASB16-AS1 |
| ATF3 | ATF3      |
| ATF3 | ATL2      |
| ATF3 | B3GNT7    |
| ATF3 | BACH1     |
| ATF3 | BBC3      |
| ATF3 | BCL2      |
| ATF3 | BCL2A1    |
| ATF3 | BOLA2B    |
| ATF3 | C19orf25  |
| ATF3 | CAMTA2    |
| ATF3 | CBX6      |
| ATF3 | CCDC117   |
| ATF3 | CCDC50    |
| ATF3 | CCL3      |
| ATF3 | CCP110    |
| ATF3 | CCSER2    |
| ATF3 | CD44      |
| ATF3 | CD82      |
| ATF3 | CDIP1     |
| ATF3 | CDKN1A    |
| ATF3 | CENPU     |
| ATF3 | CFAP97    |
| ATF3 | CHIC2     |
| ATF3 | CHMP2A    |
| ATF3 | CNOT1     |
| ATF3 | COMMD2    |
| ATF3 | COQ7      |
| ATF3 | COX20     |
| ATF3 | CTNNB1    |
| ATF3 | CTR9      |
| ATF3 | CWC25     |
| ATF3 | CYC1      |
| ATF3 | DCAF13    |
| ATF3 | DCP1B     |
| ATF3 | DDIT4     |
| ATF3 | DDX20     |
| ATF3 | DNPEP     |

|      |           |
|------|-----------|
| ATF3 | DUSP10    |
| ATF3 | DUSP22    |
| ATF3 | DVL2      |
| ATF3 | E2F7      |
| ATF3 | EBI3      |
| ATF3 | EBNA1BP2  |
| ATF3 | ECE1      |
| ATF3 | EIF1      |
| ATF3 | EIF1B     |
| ATF3 | EIF2S2    |
| ATF3 | EIF4EBP1  |
| ATF3 | EIF5      |
| ATF3 | EIF5A2    |
| ATF3 | EMP3      |
| ATF3 | ESF1      |
| ATF3 | FAM120A0S |
| ATF3 | FARSA     |
| ATF3 | FBXL5     |
| ATF3 | FBX042    |
| ATF3 | FDXR      |
| ATF3 | FIGNL1    |
| ATF3 | FKRP      |
| ATF3 | GADD45A   |
| ATF3 | GADD45B   |
| ATF3 | GAK       |
| ATF3 | GARS      |
| ATF3 | GFM1      |
| ATF3 | GGNBP2    |
| ATF3 | GLTP      |
| ATF3 | GNPTG     |
| ATF3 | GOLIM4    |
| ATF3 | GPATCH3   |
| ATF3 | GTF2B     |
| ATF3 | HAUS6     |
| ATF3 | HDAC9     |
| ATF3 | HGSNAT    |
| ATF3 | ICAM1     |
| ATF3 | IER5      |
| ATF3 | IFRD1     |
| ATF3 | IFRD2     |
| ATF3 | ITFG2     |
| ATF3 | KDM3B     |
| ATF3 | KDM6B     |
| ATF3 | KIAA0232  |
| ATF3 | KLF10     |
| ATF3 | KPNA1     |
| ATF3 | KPNA4     |
| ATF3 | LAPTM5    |
| ATF3 | LIG3      |
| ATF3 | LINC00158 |

|      |          |
|------|----------|
| ATF3 | LMNA     |
| ATF3 | LTA      |
| ATF3 | MAD1L1   |
| ATF3 | MAGOHB   |
| ATF3 | MAP1LC3B |
| ATF3 | MAP4     |
| ATF3 | MARCKS   |
| ATF3 | MDM2     |
| ATF3 | MED28    |
| ATF3 | METTL1   |
| ATF3 | MFSD2A   |
| ATF3 | MIA3     |
| ATF3 | MICU2    |
| ATF3 | MIOS     |
| ATF3 | MIR155HG |
| ATF3 | MIR22HG  |
| ATF3 | MRPL49   |
| ATF3 | MRPS30   |
| ATF3 | MTHFD1L  |
| ATF3 | MTHFD2   |
| ATF3 | MTRNR2L1 |
| ATF3 | MYC      |
| ATF3 | MY09B    |
| ATF3 | NADSYN1  |
| ATF3 | NAMPT    |
| ATF3 | NDUFA10  |
| ATF3 | NFIC     |
| ATF3 | NFKB1    |
| ATF3 | NFKB2    |
| ATF3 | NFKBIA   |
| ATF3 | NFKBIZ   |
| ATF3 | NIFK     |
| ATF3 | NINJ2    |
| ATF3 | NMT1     |
| ATF3 | NOL9     |
| ATF3 | NOM1     |
| ATF3 | NPW      |
| ATF3 | NSA2     |
| ATF3 | NUDT9    |
| ATF3 | NUP214   |
| ATF3 | ODC1     |
| ATF3 | PAM      |
| ATF3 | PAWR     |
| ATF3 | PCK2     |
| ATF3 | PDCD10   |
| ATF3 | PELI1    |
| ATF3 | PHLPP1   |
| ATF3 | PICK1    |
| ATF3 | PIM3     |
| ATF3 | PIP5K1B  |

|      |          |
|------|----------|
| ATF3 | PLEKH02  |
| ATF3 | PLK2     |
| ATF3 | PLK3     |
| ATF3 | PMAIP1   |
| ATF3 | PN01     |
| ATF3 | POLR1E   |
| ATF3 | POLR3C   |
| ATF3 | POR      |
| ATF3 | PPP1CB   |
| ATF3 | PPP1R15A |
| ATF3 | PPP1R8   |
| ATF3 | PPP3R1   |
| ATF3 | PPP6R3   |
| ATF3 | PRAF2    |
| ATF3 | PRMT1    |
| ATF3 | PRR14L   |
| ATF3 | PRRC2A   |
| ATF3 | PSAT1    |
| ATF3 | PSMC6    |
| ATF3 | PTER     |
| ATF3 | PTPN11   |
| ATF3 | PUS1     |
| ATF3 | PUSL1    |
| ATF3 | PVT1     |
| ATF3 | PYCR1    |
| ATF3 | RAB10    |
| ATF3 | RAD9A    |
| ATF3 | RARA     |
| ATF3 | RASSF7   |
| ATF3 | RBM18    |
| ATF3 | RBM7     |
| ATF3 | RCBTB2   |
| ATF3 | RCN1     |
| ATF3 | RDH14    |
| ATF3 | REEP3    |
| ATF3 | RIN3     |
| ATF3 | RNF11    |
| ATF3 | RNF167   |
| ATF3 | RNMT     |
| ATF3 | RPF2     |
| ATF3 | RPIA     |
| ATF3 | RPS27L   |
| ATF3 | RRAGC    |
| ATF3 | RRP7A    |
| ATF3 | RSL24D1  |
| ATF3 | RUFY1    |
| ATF3 | SAFB2    |
| ATF3 | SARNP    |
| ATF3 | SDCBP    |
| ATF3 | SFT2D2   |

|      |           |
|------|-----------|
| ATF3 | SLC16A1   |
| ATF3 | SLC1A5    |
| ATF3 | SLC20A1   |
| ATF3 | SLC25A26  |
| ATF3 | SLC25A33  |
| ATF3 | SLC29A1   |
| ATF3 | SLC35A4   |
| ATF3 | SLC38A1   |
| ATF3 | SLC3A2    |
| ATF3 | SLC4A7    |
| ATF3 | SNHG15    |
| ATF3 | SNHG8     |
| ATF3 | SNN       |
| ATF3 | SPPL2A    |
| ATF3 | SPTLC1    |
| ATF3 | STAMBPL1  |
| ATF3 | STAT5A    |
| ATF3 | STAU1     |
| ATF3 | STRN4     |
| ATF3 | TAF9      |
| ATF3 | TANK      |
| ATF3 | TBC1D23   |
| ATF3 | TBC1D9B   |
| ATF3 | TCAIM     |
| ATF3 | TFEC      |
| ATF3 | TGS1      |
| ATF3 | THAP9-AS1 |
| ATF3 | TIMM44    |
| ATF3 | TMEM126A  |
| ATF3 | TMEM199   |
| ATF3 | TMEM267   |
| ATF3 | TMEM38B   |
| ATF3 | TNFAIP8   |
| ATF3 | TNFRSF18  |
| ATF3 | TNIP2     |
| ATF3 | TRAF1     |
| ATF3 | TRIAP1    |
| ATF3 | TRIP6     |
| ATF3 | TSPYL2    |
| ATF3 | TUBE1     |
| ATF3 | UBXN11    |
| ATF3 | UPF2      |
| ATF3 | USP12     |
| ATF3 | VPS41     |
| ATF3 | WARS2     |
| ATF3 | WDPCP     |
| ATF3 | WDR1      |
| ATF3 | WDR4      |
| ATF3 | WTAP      |
| ATF3 | XPC       |

|      |         |
|------|---------|
| ATF3 | YBX3    |
| ATF3 | ZBTB10  |
| ATF3 | ZBTB32  |
| ATF3 | ZC3H12D |
| ATF3 | ZC3H4   |
| ATF3 | ZFAS1   |
| ATF3 | ZFR     |
| ATF3 | ZHX1    |
| ATF3 | ZNF212  |
| ATF3 | ZNF830  |
| ATF3 | ZRANB2  |
| ATF4 | AARS    |
| ATF4 | ACSL1   |
| ATF4 | ADCY3   |
| ATF4 | ADPGK   |
| ATF4 | ALG13   |
| ATF4 | ANKRD11 |
| ATF4 | APLF    |
| ATF4 | ARPP19  |
| ATF4 | ASNS    |
| ATF4 | ATAD1   |
| ATF4 | ATF4    |
| ATF4 | ATF5    |
| ATF4 | ATG101  |
| ATF4 | ATG5    |
| ATF4 | ATXN2L  |
| ATF4 | BBC3    |
| ATF4 | BCAS2   |
| ATF4 | BET1    |
| ATF4 | BUD31   |
| ATF4 | C6orf48 |
| ATF4 | CARS    |
| ATF4 | CASC3   |
| ATF4 | CBWD2   |
| ATF4 | CCDC59  |
| ATF4 | CCL3    |
| ATF4 | CCND1   |
| ATF4 | CCSER2  |
| ATF4 | CD63    |
| ATF4 | CDK17   |
| ATF4 | CEBPB   |
| ATF4 | CEBPG   |
| ATF4 | CHAC1   |
| ATF4 | CLK1    |
| ATF4 | CSNK1D  |
| ATF4 | CSTF2T  |
| ATF4 | DAP     |
| ATF4 | DCTN4   |
| ATF4 | DDIT3   |
| ATF4 | DDIT4   |

|      |          |
|------|----------|
| ATF4 | DDX19A   |
| ATF4 | DESI1    |
| ATF4 | DRAM1    |
| ATF4 | DUSP10   |
| ATF4 | ECSIT    |
| ATF4 | EIF1     |
| ATF4 | EIF2S2   |
| ATF4 | EIF4A2   |
| ATF4 | EIF4EBP1 |
| ATF4 | EMD      |
| ATF4 | ENC1     |
| ATF4 | EPB41    |
| ATF4 | EPRS     |
| ATF4 | ETF1     |
| ATF4 | FAM50A   |
| ATF4 | FTH1     |
| ATF4 | GARS     |
| ATF4 | GHITM    |
| ATF4 | GOLGA5   |
| ATF4 | GOT1     |
| ATF4 | GTF2H1   |
| ATF4 | HAX1     |
| ATF4 | HERPUD1  |
| ATF4 | HSPA9    |
| ATF4 | IARS     |
| ATF4 | IFRD1    |
| ATF4 | IGF2R    |
| ATF4 | IL23A    |
| ATF4 | IL6      |
| ATF4 | IMPDH2   |
| ATF4 | INPP5F   |
| ATF4 | KLF6     |
| ATF4 | KLF7     |
| ATF4 | KYNU     |
| ATF4 | LIAS     |
| ATF4 | LONP1    |
| ATF4 | LZTFL1   |
| ATF4 | MAFG     |
| ATF4 | MAP4     |
| ATF4 | MIR155HG |
| ATF4 | MRM3     |
| ATF4 | MRPS18B  |
| ATF4 | MRRF     |
| ATF4 | MST01    |
| ATF4 | MTHFD2   |
| ATF4 | NAMPT    |
| ATF4 | NECAP1   |
| ATF4 | NFE2L1   |
| ATF4 | NFE2L2   |
| ATF4 | NFKB2    |

|      |          |
|------|----------|
| ATF4 | NKRF     |
| ATF4 | NOL10    |
| ATF4 | NRBF2    |
| ATF4 | NRR0S    |
| ATF4 | OGT      |
| ATF4 | PCK2     |
| ATF4 | PDAP1    |
| ATF4 | PEF1     |
| ATF4 | PHGDH    |
| ATF4 | PMAIP1   |
| ATF4 | PPP1R11  |
| ATF4 | PPP1R15A |
| ATF4 | PRNP     |
| ATF4 | PRR14    |
| ATF4 | PTP4A1   |
| ATF4 | PVT1     |
| ATF4 | RAD23A   |
| ATF4 | RASSF1   |
| ATF4 | RBM7     |
| ATF4 | RPF1     |
| ATF4 | RPL13    |
| ATF4 | RPL13A   |
| ATF4 | RPL23    |
| ATF4 | RPL9     |
| ATF4 | RPLP2    |
| ATF4 | RPS21    |
| ATF4 | RPS29    |
| ATF4 | RPS6KB2  |
| ATF4 | RSL24D1  |
| ATF4 | SARS     |
| ATF4 | SBDS     |
| ATF4 | SCFD1    |
| ATF4 | SECISBP2 |
| ATF4 | SESN2    |
| ATF4 | SH2B3    |
| ATF4 | SHMT2    |
| ATF4 | SLC1A5   |
| ATF4 | SLC25A39 |
| ATF4 | SLC38A2  |
| ATF4 | SLC3A2   |
| ATF4 | SLC7A1   |
| ATF4 | SNHG15   |
| ATF4 | SNHG8    |
| ATF4 | SPG21    |
| ATF4 | STS      |
| ATF4 | STX4     |
| ATF4 | STX5     |
| ATF4 | SYTL1    |
| ATF4 | TARS     |
| ATF4 | TBL1X    |



|      |           |
|------|-----------|
| ATF4 | TFEC      |
| ATF4 | TIMM44    |
| ATF4 | TJP1      |
| ATF4 | TMEM167B  |
| ATF4 | TMEM267   |
| ATF4 | TMUB1     |
| ATF4 | TNFRSF10B |
| ATF4 | TOX2      |
| ATF4 | TRAF1     |
| ATF4 | TRIB3     |
| ATF4 | TSC22D2   |
| ATF4 | TTC19     |
| ATF4 | TXNL1     |
| ATF4 | UBC       |
| ATF4 | UBE2B     |
| ATF4 | UBL3      |
| ATF4 | USP14     |
| ATF4 | USP37     |
| ATF4 | WARS      |
| ATF4 | WDR82     |
| ATF4 | XAB2      |
| ATF4 | XPOT      |
| ATF4 | YARS      |
| ATF4 | YTHDF1    |
| ATF4 | ZBED3     |
| ATF4 | ZFAND2A   |
| ATF4 | ZFAS1     |
| ATF4 | ZFPL1     |
| ATF4 | ZNF354A   |
| ATF4 | ZNF771    |
| ATF4 | ZNF839    |
| ATF4 | ZSWIM7    |
| ATF5 | AARS      |
| ATF5 | AFF2      |
| ATF5 | ARID5B    |
| ATF5 | C11orf24  |
| ATF5 | CARS      |
| ATF5 | CDK2AP2   |
| ATF5 | CEBPB     |
| ATF5 | CEBPG     |
| ATF5 | CHAC1     |
| ATF5 | CRLS1     |
| ATF5 | DDIT3     |
| ATF5 | DDIT4     |
| ATF5 | EEF2      |
| ATF5 | EIF1      |
| ATF5 | ELMSAN1   |
| ATF5 | GARS      |
| ATF5 | HERPUD1   |
| ATF5 | JOSD2     |

|      |           |
|------|-----------|
| ATF5 | LM02      |
| ATF5 | MIR3681HG |
| ATF5 | NFE2L1    |
| ATF5 | PCK2      |
| ATF5 | PICALM    |
| ATF5 | PLEKHM1   |
| ATF5 | PMVK      |
| ATF5 | PPDPF     |
| ATF5 | PXK       |
| ATF5 | RBM3      |
| ATF5 | SBDS      |
| ATF5 | SH2D3C    |
| ATF5 | SHMT2     |
| ATF5 | SLC16A3   |
| ATF5 | SLC1A5    |
| ATF5 | SLC3A2    |
| ATF5 | TAF10     |
| ATF5 | TMSB4X    |
| ATF5 | TRIB3     |
| ATF5 | USP36     |
| ATF5 | WARS      |
| ATF5 | WDR4      |
| ATF5 | ZNF354A   |
| ATF6 | AAK1      |
| ATF6 | AAMP      |
| ATF6 | AARS      |
| ATF6 | ABCB8     |
| ATF6 | ABCB9     |
| ATF6 | ABCC4     |
| ATF6 | ABCF3     |
| ATF6 | ACADVL    |
| ATF6 | ACBD3     |
| ATF6 | AC02      |
| ATF6 | AC0X1     |
| ATF6 | ACSL3     |
| ATF6 | ACSL4     |
| ATF6 | ACSS1     |
| ATF6 | ACTR6     |
| ATF6 | ACY3      |
| ATF6 | ACYP2     |
| ATF6 | ADAM10    |
| ATF6 | ADAR      |
| ATF6 | ADCK1     |
| ATF6 | ADI1      |
| ATF6 | ADIPOR1   |
| ATF6 | AFF4      |
| ATF6 | AGA       |
| ATF6 | AGPAT3    |
| ATF6 | AK3       |
| ATF6 | AKR1A1    |

|      |          |
|------|----------|
| ATF6 | AKT1S1   |
| ATF6 | ALDH18A1 |
| ATF6 | ALDH1L2  |
| ATF6 | ALG1     |
| ATF6 | ALG10B   |
| ATF6 | ALG11    |
| ATF6 | ALG12    |
| ATF6 | ALG13    |
| ATF6 | ALG14    |
| ATF6 | ALG2     |
| ATF6 | ALG3     |
| ATF6 | ANAPC13  |
| ATF6 | ANAPC5   |
| ATF6 | ANKHD1   |
| ATF6 | ANKRD28  |
| ATF6 | ANKRD37  |
| ATF6 | ANKZF1   |
| ATF6 | AN09     |
| ATF6 | ANXA5    |
| ATF6 | ANXA6    |
| ATF6 | ANXA7    |
| ATF6 | AP3D1    |
| ATF6 | APH1B    |
| ATF6 | APMAP    |
| ATF6 | AQP3     |
| ATF6 | AREG     |
| ATF6 | ARF4     |
| ATF6 | ARFGAP1  |
| ATF6 | ARFGAP3  |
| ATF6 | ARFGEF2  |
| ATF6 | ARFIP2   |
| ATF6 | ARHGAP18 |
| ATF6 | ARHGAP27 |
| ATF6 | ARID3A   |
| ATF6 | ARL1     |
| ATF6 | ARL4A    |
| ATF6 | ARL5A    |
| ATF6 | ARMCX3   |
| ATF6 | ARRDC3   |
| ATF6 | ARSA     |
| ATF6 | ASAH1    |
| ATF6 | ASXL1    |
| ATF6 | ATF6     |
| ATF6 | ATG101   |
| ATF6 | ATP13A1  |
| ATF6 | ATP2A2   |
| ATF6 | ATP2A3   |
| ATF6 | ATP6AP1  |
| ATF6 | ATP6AP2  |
| ATF6 | ATP6V0A1 |

|      |           |
|------|-----------|
| ATF6 | ATP6V0B   |
| ATF6 | ATP6V0E1  |
| ATF6 | ATP8B2    |
| ATF6 | ATRAID    |
| ATF6 | AURKAIP1  |
| ATF6 | B3GALNT1  |
| ATF6 | B3GNTL1   |
| ATF6 | B4GALT1   |
| ATF6 | B4GALT3   |
| ATF6 | B4GALT4   |
| ATF6 | BAG3      |
| ATF6 | BAZ2A     |
| ATF6 | BCAP31    |
| ATF6 | BCKDK     |
| ATF6 | BET1      |
| ATF6 | BET1L     |
| ATF6 | BEX5      |
| ATF6 | BHLHE41   |
| ATF6 | BIRC2     |
| ATF6 | BLM       |
| ATF6 | BLVRA     |
| ATF6 | BORCS5    |
| ATF6 | BORCS6    |
| ATF6 | BRAP      |
| ATF6 | BSDC1     |
| ATF6 | BSG       |
| ATF6 | BTAF1     |
| ATF6 | BTG2      |
| ATF6 | C11orf24  |
| ATF6 | C11orf80  |
| ATF6 | C15orf61  |
| ATF6 | C17orf107 |
| ATF6 | C18orf32  |
| ATF6 | C19orf24  |
| ATF6 | C19orf70  |
| ATF6 | C19orf81  |
| ATF6 | C1GALT1C1 |
| ATF6 | C21orf2   |
| ATF6 | C2orf88   |
| ATF6 | C4orf3    |
| ATF6 | C4orf48   |
| ATF6 | C5orf15   |
| ATF6 | C6orf52   |
| ATF6 | CA11      |
| ATF6 | CALCOC01  |
| ATF6 | CALR      |
| ATF6 | CALU      |
| ATF6 | CANX      |
| ATF6 | CASP3     |
| ATF6 | CASP4     |

|      |          |
|------|----------|
| ATF6 | CAST     |
| ATF6 | CBFA2T2  |
| ATF6 | CBFA2T3  |
| ATF6 | CBWD1    |
| ATF6 | CBWD5    |
| ATF6 | CBX4     |
| ATF6 | CBX7     |
| ATF6 | CCDC144A |
| ATF6 | CCDC167  |
| ATF6 | CCDC186  |
| ATF6 | CCDC47   |
| ATF6 | CCL25    |
| ATF6 | CCM2     |
| ATF6 | CCNC     |
| ATF6 | CCNL1    |
| ATF6 | CCPG1    |
| ATF6 | CCR10    |
| ATF6 | CCS      |
| ATF6 | CCT8     |
| ATF6 | CD164    |
| ATF6 | CD320    |
| ATF6 | CD38     |
| ATF6 | CD55     |
| ATF6 | CD63     |
| ATF6 | CDC37    |
| ATF6 | CDIP1    |
| ATF6 | CDK2AP2  |
| ATF6 | CDKN1A   |
| ATF6 | CDKN1B   |
| ATF6 | CDR2     |
| ATF6 | CDV3     |
| ATF6 | CEBPB    |
| ATF6 | CERS2    |
| ATF6 | CFL2     |
| ATF6 | CHCHD2   |
| ATF6 | CHID1    |
| ATF6 | CHPF     |
| ATF6 | CHPF2    |
| ATF6 | CHRN1    |
| ATF6 | CHST11   |
| ATF6 | CHST12   |
| ATF6 | CHST2    |
| ATF6 | CHUK     |
| ATF6 | CINP     |
| ATF6 | CISD2    |
| ATF6 | CITED2   |
| ATF6 | CKAP4    |
| ATF6 | CLASP2   |
| ATF6 | CLCC1    |
| ATF6 | CLCN7    |

|      |            |
|------|------------|
| ATF6 | CLDN14     |
| ATF6 | CLEC2B     |
| ATF6 | CLINT1     |
| ATF6 | CLPTM1     |
| ATF6 | CLPTM1L    |
| ATF6 | CNBP       |
| ATF6 | CNOT11     |
| ATF6 | CNPY2      |
| ATF6 | COASY      |
| ATF6 | COG3       |
| ATF6 | COMMD1     |
| ATF6 | COMMD3     |
| ATF6 | COPB2      |
| ATF6 | COPE       |
| ATF6 | COPG1      |
| ATF6 | COPZ1      |
| ATF6 | COQ10B     |
| ATF6 | COQ6       |
| ATF6 | COX6A1     |
| ATF6 | CPEB4      |
| ATF6 | CRADD      |
| ATF6 | CREB3      |
| ATF6 | CRELD2     |
| ATF6 | CRLS1      |
| ATF6 | CSAD       |
| ATF6 | CSGALNACT2 |
| ATF6 | CSNK1E     |
| ATF6 | CTBS       |
| ATF6 | CTHRC1     |
| ATF6 | CTNNA1     |
| ATF6 | CTSA       |
| ATF6 | CTSB       |
| ATF6 | CTSD       |
| ATF6 | CUL1       |
| ATF6 | CUTA       |
| ATF6 | CYB561D2   |
| ATF6 | CYB5R1     |
| ATF6 | CYCS       |
| ATF6 | CYTIP      |
| ATF6 | DAD1       |
| ATF6 | DAP        |
| ATF6 | DAPL1      |
| ATF6 | DCTN3      |
| ATF6 | DDB1       |
| ATF6 | DDIT4      |
| ATF6 | DDX31      |
| ATF6 | DDX55      |
| ATF6 | DEDD2      |
| ATF6 | DEF6       |
| ATF6 | DENND1B    |

|      |         |
|------|---------|
| ATF6 | DENND6B |
| ATF6 | DERL1   |
| ATF6 | DERL3   |
| ATF6 | DESI1   |
| ATF6 | DHDDS   |
| ATF6 | DHRS7   |
| ATF6 | DHRS9   |
| ATF6 | DNAJA2  |
| ATF6 | DNAJB11 |
| ATF6 | DNAJB12 |
| ATF6 | DNAJB9  |
| ATF6 | DNAJC1  |
| ATF6 | DNAJC10 |
| ATF6 | DNAJC12 |
| ATF6 | DNAJC25 |
| ATF6 | DNAJC3  |
| ATF6 | DNAJC4  |
| ATF6 | DNASE2  |
| ATF6 | DNHD1   |
| ATF6 | DOHH    |
| ATF6 | DPAGT1  |
| ATF6 | DPM2    |
| ATF6 | DPM3    |
| ATF6 | DPP7    |
| ATF6 | DUSP12  |
| ATF6 | DUSP22  |
| ATF6 | DUSP5   |
| ATF6 | DYNLL2  |
| ATF6 | DYRK4   |
| ATF6 | EAF2    |
| ATF6 | EBAG9   |
| ATF6 | EDEM1   |
| ATF6 | EDEM2   |
| ATF6 | EDF1    |
| ATF6 | EEF1D   |
| ATF6 | EIF2A   |
| ATF6 | EIF3A   |
| ATF6 | EIF3K   |
| ATF6 | ELK3    |
| ATF6 | ELL     |
| ATF6 | ELL2    |
| ATF6 | ELMOD2  |
| ATF6 | EMC10   |
| ATF6 | EMC2    |
| ATF6 | EMC3    |
| ATF6 | EMC4    |
| ATF6 | ENTPD1  |
| ATF6 | ENTPD4  |
| ATF6 | EPHX1   |
| ATF6 | EPRS    |

|      |          |
|------|----------|
| ATF6 | ERC1     |
| ATF6 | ERGIC1   |
| ATF6 | ERGIC2   |
| ATF6 | ERGIC3   |
| ATF6 | ERLEC1   |
| ATF6 | ERN1     |
| ATF6 | ER01A    |
| ATF6 | ER01B    |
| ATF6 | ERP29    |
| ATF6 | ERP44    |
| ATF6 | ESR2     |
| ATF6 | ESYT2    |
| ATF6 | ETNK1    |
| ATF6 | EVI2B    |
| ATF6 | F2RL3    |
| ATF6 | FAM13A   |
| ATF6 | FAM160B2 |
| ATF6 | FAM174A  |
| ATF6 | FAM177A1 |
| ATF6 | FAM214A  |
| ATF6 | FAM3C    |
| ATF6 | FAM49A   |
| ATF6 | FAM91A1  |
| ATF6 | FAM98A   |
| ATF6 | FANCE    |
| ATF6 | FASTK    |
| ATF6 | FBXL15   |
| ATF6 | FBX011   |
| ATF6 | FBX016   |
| ATF6 | FBXW7    |
| ATF6 | FDX1     |
| ATF6 | FIS1     |
| ATF6 | FKBP11   |
| ATF6 | FKBP14   |
| ATF6 | FKBP2    |
| ATF6 | FN3KRP   |
| ATF6 | FNDC3A   |
| ATF6 | FNDC3B   |
| ATF6 | FNTB     |
| ATF6 | FOS      |
| ATF6 | FOXN3    |
| ATF6 | FOXO3    |
| ATF6 | FRA10AC1 |
| ATF6 | FRZB     |
| ATF6 | FTL      |
| ATF6 | FTSJ1    |
| ATF6 | FUCA2    |
| ATF6 | FUNDC2   |
| ATF6 | FUT8     |
| ATF6 | FUZ      |



|      |         |
|------|---------|
| ATF6 | G3BP2   |
| ATF6 | GABARAP |
| ATF6 | GADD45A |
| ATF6 | GADD45B |
| ATF6 | GALK2   |
| ATF6 | GALNT2  |
| ATF6 | GAN     |
| ATF6 | GAS6    |
| ATF6 | GCSH    |
| ATF6 | GEMIN7  |
| ATF6 | GFPT1   |
| ATF6 | GGH     |
| ATF6 | GHITM   |
| ATF6 | GIGYF2  |
| ATF6 | GIT1    |
| ATF6 | GLCCI1  |
| ATF6 | GLG1    |
| ATF6 | GLIPR1  |
| ATF6 | GLRX    |
| ATF6 | GLS     |
| ATF6 | GLT8D1  |
| ATF6 | GMPPA   |
| ATF6 | GMPPB   |
| ATF6 | GNL3    |
| ATF6 | GNPTG   |
| ATF6 | GOLGA2  |
| ATF6 | GOLGA4  |
| ATF6 | GOLGA5  |
| ATF6 | GOLGB1  |
| ATF6 | GOLPH3  |
| ATF6 | GOLPH3L |
| ATF6 | GOLT1B  |
| ATF6 | GORASP2 |
| ATF6 | GOSR2   |
| ATF6 | GPCPD1  |
| ATF6 | GPLD1   |
| ATF6 | GPR108  |
| ATF6 | GPR89A  |
| ATF6 | GPR89B  |
| ATF6 | GPS2    |
| ATF6 | GPX7    |
| ATF6 | GRINA   |
| ATF6 | GRK6    |
| ATF6 | GRN     |
| ATF6 | GTF2B   |
| ATF6 | GUK1    |
| ATF6 | GUSB    |
| ATF6 | GYS1    |
| ATF6 | H1FX    |
| ATF6 | HAGH    |

|      |           |
|------|-----------|
| ATF6 | HARBI1    |
| ATF6 | HAX1      |
| ATF6 | HBP1      |
| ATF6 | HCST      |
| ATF6 | HDLBP     |
| ATF6 | HECW2     |
| ATF6 | HERPUD1   |
| ATF6 | HEXA      |
| ATF6 | HEXB      |
| ATF6 | HIBCH     |
| ATF6 | HIST1H1C  |
| ATF6 | HIST1H2BN |
| ATF6 | HLA-A     |
| ATF6 | HLA-B     |
| ATF6 | HLA-DQA2  |
| ATF6 | HLA-DQB1  |
| ATF6 | HLA-DRB5  |
| ATF6 | HLA-E     |
| ATF6 | HM13      |
| ATF6 | H00K2     |
| ATF6 | H0XB2     |
| ATF6 | H0XB7     |
| ATF6 | HPCAL1    |
| ATF6 | HSD17B11  |
| ATF6 | HSP90B1   |
| ATF6 | HSPA13    |
| ATF6 | HSPA5     |
| ATF6 | IBTK      |
| ATF6 | ICAM1     |
| ATF6 | ICAM2     |
| ATF6 | ICAM3     |
| ATF6 | IDH2      |
| ATF6 | IDH3G     |
| ATF6 | IER2      |
| ATF6 | IER3IP1   |
| ATF6 | IFI27L2   |
| ATF6 | IFNAR1    |
| ATF6 | IFNAR2    |
| ATF6 | IFRD1     |
| ATF6 | IFT20     |
| ATF6 | IGLL5     |
| ATF6 | IGSF8     |
| ATF6 | IKBIP     |
| ATF6 | IL10RA    |
| ATF6 | IL15RA    |
| ATF6 | IL16      |
| ATF6 | IMP3      |
| ATF6 | IMPAD1    |
| ATF6 | IMPDH1    |
| ATF6 | ING2      |

|      |           |
|------|-----------|
| ATF6 | INSIG1    |
| ATF6 | INSIG2    |
| ATF6 | IPPK      |
| ATF6 | IQGAP2    |
| ATF6 | IRAK4     |
| ATF6 | IRF1      |
| ATF6 | IRF4      |
| ATF6 | IRF7      |
| ATF6 | ISCU      |
| ATF6 | ISG20     |
| ATF6 | ISL2      |
| ATF6 | ISOC2     |
| ATF6 | ITM2B     |
| ATF6 | ITM2C     |
| ATF6 | ITPR2     |
| ATF6 | JCHAIN    |
| ATF6 | JMJD6     |
| ATF6 | JMJD8     |
| ATF6 | JMY       |
| ATF6 | JUN       |
| ATF6 | KCNK6     |
| ATF6 | KCNMA1    |
| ATF6 | KCNN3     |
| ATF6 | KCNN4     |
| ATF6 | KDEL1     |
| ATF6 | KDEL2     |
| ATF6 | KDEL3     |
| ATF6 | KDM4C     |
| ATF6 | KIAA2013  |
| ATF6 | KIF5C     |
| ATF6 | KIZ       |
| ATF6 | KLC4      |
| ATF6 | KLF13     |
| ATF6 | KLHDC10   |
| ATF6 | KLHDC2    |
| ATF6 | KMO       |
| ATF6 | KRTCAP2   |
| ATF6 | KTI12     |
| ATF6 | L3MBTL2   |
| ATF6 | LAMTOR2   |
| ATF6 | LAPTM4A   |
| ATF6 | LARP1B    |
| ATF6 | LCORL     |
| ATF6 | LEPROTL1  |
| ATF6 | LGALS1    |
| ATF6 | LINC01485 |
| ATF6 | LMAN1     |
| ATF6 | LNX1      |
| ATF6 | LRIF1     |
| ATF6 | LRIG1     |

|      |             |
|------|-------------|
| ATF6 | LRP10       |
| ATF6 | LRRRC59     |
| ATF6 | LRRRC8D     |
| ATF6 | LSP1        |
| ATF6 | LTBP3       |
| ATF6 | LTN1        |
| ATF6 | LUZP1       |
| ATF6 | LYSMD3      |
| ATF6 | MAGED1      |
| ATF6 | MAGT1       |
| ATF6 | MAN1A1      |
| ATF6 | MAN1A2      |
| ATF6 | MANF        |
| ATF6 | MAPK9       |
| ATF6 | MARCH6      |
| ATF6 | MBNL2       |
| ATF6 | MBTPS1      |
| ATF6 | MCEE        |
| ATF6 | MCFD2       |
| ATF6 | MCL1        |
| ATF6 | MCUR1       |
| ATF6 | ME2         |
| ATF6 | MED20       |
| ATF6 | MEI1        |
| ATF6 | MFF         |
| ATF6 | MGAT1       |
| ATF6 | MIA2        |
| ATF6 | MIA3        |
| ATF6 | MIER2       |
| ATF6 | MIF         |
| ATF6 | MIR193BHG   |
| ATF6 | MIR22HG     |
| ATF6 | MIR4435-2HG |
| ATF6 | MLEC        |
| ATF6 | MLX         |
| ATF6 | MMACHC      |
| ATF6 | MOGS        |
| ATF6 | MON2        |
| ATF6 | MORF4L2     |
| ATF6 | MOSPD3      |
| ATF6 | MPC1        |
| ATF6 | MPHOSPH8    |
| ATF6 | MPI         |
| ATF6 | MPRIP       |
| ATF6 | MPZL1       |
| ATF6 | MRFAP1L1    |
| ATF6 | MRPL36      |
| ATF6 | MRPL40      |
| ATF6 | MRPL54      |
| ATF6 | MRPL55      |

|      |         |
|------|---------|
| ATF6 | MRPS31  |
| ATF6 | MRPS33  |
| ATF6 | MST01   |
| ATF6 | MTDH    |
| ATF6 | MTFR1   |
| ATF6 | MTRF1L  |
| ATF6 | MVP     |
| ATF6 | MXD4    |
| ATF6 | MYCBP2  |
| ATF6 | MYDGF   |
| ATF6 | MYL6    |
| ATF6 | MYLPF   |
| ATF6 | MZB1    |
| ATF6 | NAB1    |
| ATF6 | NACA    |
| ATF6 | NADK    |
| ATF6 | NAGK    |
| ATF6 | NAGLU   |
| ATF6 | NANS    |
| ATF6 | NAPA    |
| ATF6 | NARF    |
| ATF6 | NBR1    |
| ATF6 | NCDN    |
| ATF6 | NCK1    |
| ATF6 | NCLN    |
| ATF6 | NDEL1   |
| ATF6 | NDFIP1  |
| ATF6 | NDFIP2  |
| ATF6 | NDUFA1  |
| ATF6 | NDUFA11 |
| ATF6 | NDUFA13 |
| ATF6 | NDUFA4  |
| ATF6 | NDUFA7  |
| ATF6 | NDUFA9  |
| ATF6 | NDUFB4  |
| ATF6 | NDUFB6  |
| ATF6 | NDUFS5  |
| ATF6 | NDUFS6  |
| ATF6 | NDUFS8  |
| ATF6 | NDUFV3  |
| ATF6 | NEAT1   |
| ATF6 | NEDD4L  |
| ATF6 | NEDD9   |
| ATF6 | NENF    |
| ATF6 | NET1    |
| ATF6 | NET02   |
| ATF6 | NEU1    |
| ATF6 | NFE2L3  |
| ATF6 | NFKBID  |
| ATF6 | NGLY1   |

|      |            |
|------|------------|
| ATF6 | NIPA2      |
| ATF6 | NMD3       |
| ATF6 | NOM03      |
| ATF6 | NOP10      |
| ATF6 | NOP58      |
| ATF6 | NRBF2      |
| ATF6 | NRDC       |
| ATF6 | NRSN2      |
| ATF6 | NSG1       |
| ATF6 | NSMCE3     |
| ATF6 | NT5C3A     |
| ATF6 | NT5DC2     |
| ATF6 | NUCB1      |
| ATF6 | NUCB2      |
| ATF6 | NUPL2      |
| ATF6 | NUS1       |
| ATF6 | NUTM2B-AS1 |
| ATF6 | ODF3B      |
| ATF6 | OGF0D2     |
| ATF6 | OGF0D3     |
| ATF6 | ORMDL1     |
| ATF6 | ORMDL2     |
| ATF6 | OS9        |
| ATF6 | OSBPL7     |
| ATF6 | OST4       |
| ATF6 | OSTC       |
| ATF6 | OTUD1      |
| ATF6 | P4HB       |
| ATF6 | P4HTM      |
| ATF6 | PAGR1      |
| ATF6 | PAIP2B     |
| ATF6 | PAPSS1     |
| ATF6 | PARD6A     |
| ATF6 | PARM1      |
| ATF6 | PARP4      |
| ATF6 | PBXIP1     |
| ATF6 | PCMT1      |
| ATF6 | PDE4B      |
| ATF6 | PDE4DIP    |
| ATF6 | PDHA1      |
| ATF6 | PDIA3      |
| ATF6 | PDIA4      |
| ATF6 | PDIA5      |
| ATF6 | PDIA6      |
| ATF6 | PDK1       |
| ATF6 | PDK2       |
| ATF6 | PDXK       |
| ATF6 | PEBP1      |
| ATF6 | PELO       |
| ATF6 | PEPD       |

|      |            |
|------|------------|
| ATF6 | PET100     |
| ATF6 | PGM1       |
| ATF6 | PGM3       |
| ATF6 | PGRMC2     |
| ATF6 | PHC3       |
| ATF6 | PHF1       |
| ATF6 | PHF19      |
| ATF6 | PHPT1      |
| ATF6 | PIGP       |
| ATF6 | PIK3CD-AS2 |
| ATF6 | PIK3CG     |
| ATF6 | PIM2       |
| ATF6 | PIR        |
| ATF6 | PJA2       |
| ATF6 | PKHD1L1    |
| ATF6 | PLD3       |
| ATF6 | PLD4       |
| ATF6 | PLEKHN1    |
| ATF6 | PLOD1      |
| ATF6 | PLOD3      |
| ATF6 | PLPP5      |
| ATF6 | PLTP       |
| ATF6 | PMEPA1     |
| ATF6 | PNKP       |
| ATF6 | PNOC       |
| ATF6 | PODXL2     |
| ATF6 | POGLUT1    |
| ATF6 | POLR3D     |
| ATF6 | POMC       |
| ATF6 | POP5       |
| ATF6 | POR        |
| ATF6 | POU2AF1    |
| ATF6 | PPCDC      |
| ATF6 | PPIB       |
| ATF6 | PPIL2      |
| ATF6 | PPP2CB     |
| ATF6 | PPP2R5B    |
| ATF6 | PPP2R5C    |
| ATF6 | PPP6R2     |
| ATF6 | PRCP       |
| ATF6 | PRDM1      |
| ATF6 | PRDM15     |
| ATF6 | PRDX2      |
| ATF6 | PRDX4      |
| ATF6 | PREB       |
| ATF6 | PRKAG1     |
| ATF6 | PRKCSH     |
| ATF6 | PRKD2      |
| ATF6 | PRKD3      |
| ATF6 | PRR14      |

|      |          |
|------|----------|
| ATF6 | PRR5     |
| ATF6 | PRRC1    |
| ATF6 | PSMC4    |
| ATF6 | PSMC5    |
| ATF6 | PSMD12   |
| ATF6 | PSMD8    |
| ATF6 | PSME1    |
| ATF6 | PTP4A2   |
| ATF6 | PTP4A3   |
| ATF6 | PTPN1    |
| ATF6 | PTPN23   |
| ATF6 | PTPRN2   |
| ATF6 | PTRH2    |
| ATF6 | PUS10    |
| ATF6 | PUS7L    |
| ATF6 | PYGB     |
| ATF6 | QPCT     |
| ATF6 | QPRT     |
| ATF6 | QS0X1    |
| ATF6 | QTRT1    |
| ATF6 | QTRT2    |
| ATF6 | R3HDM1   |
| ATF6 | RAB18    |
| ATF6 | RAB1A    |
| ATF6 | RAB21    |
| ATF6 | RAB24    |
| ATF6 | RAB2A    |
| ATF6 | RAB35    |
| ATF6 | RAB3GAP1 |
| ATF6 | RAB40B   |
| ATF6 | RABAC1   |
| ATF6 | RABEPK   |
| ATF6 | RAD54B   |
| ATF6 | RAD9A    |
| ATF6 | RAP1A    |
| ATF6 | RARS2    |
| ATF6 | RBM19    |
| ATF6 | RBM26    |
| ATF6 | RBM33    |
| ATF6 | RBM47    |
| ATF6 | RBPJ     |
| ATF6 | RCL1     |
| ATF6 | REEP3    |
| ATF6 | REEP5    |
| ATF6 | RELT     |
| ATF6 | RER1     |
| ATF6 | REX02    |
| ATF6 | RGCC     |
| ATF6 | RGS1     |
| ATF6 | RGS16    |



|      |         |
|------|---------|
| ATF6 | RGS2    |
| ATF6 | RHBDD1  |
| ATF6 | RING1   |
| ATF6 | RNASEH1 |
| ATF6 | RNF103  |
| ATF6 | RNF11   |
| ATF6 | RNF141  |
| ATF6 | RNF149  |
| ATF6 | RNF168  |
| ATF6 | RNF169  |
| ATF6 | RNF213  |
| ATF6 | RNF32   |
| ATF6 | RPL10   |
| ATF6 | RPL15   |
| ATF6 | RPL3    |
| ATF6 | RPL36AL |
| ATF6 | RPLP0   |
| ATF6 | RPLP1   |
| ATF6 | RPN1    |
| ATF6 | RPN2    |
| ATF6 | RPS10   |
| ATF6 | RPS19   |
| ATF6 | RPS28   |
| ATF6 | RPS4X   |
| ATF6 | RPS6KB2 |
| ATF6 | RRAGD   |
| ATF6 | RRBP1   |
| ATF6 | RREB1   |
| ATF6 | RSU1    |
| ATF6 | RTN2    |
| ATF6 | RTN3    |
| ATF6 | RUNX1   |
| ATF6 | RWDD2B  |
| ATF6 | S100A11 |
| ATF6 | SAP18   |
| ATF6 | SAR1A   |
| ATF6 | SAR1B   |
| ATF6 | SARAF   |
| ATF6 | SAT1    |
| ATF6 | SCAMP2  |
| ATF6 | SCAMP3  |
| ATF6 | SCFD1   |
| ATF6 | SCPEP1  |
| ATF6 | SCYL1   |
| ATF6 | SDF2L1  |
| ATF6 | SDF4    |
| ATF6 | SEC11C  |
| ATF6 | SEC13   |
| ATF6 | SEC14L1 |
| ATF6 | SEC22B  |

|      |          |
|------|----------|
| ATF6 | SEC23B   |
| ATF6 | SEC24A   |
| ATF6 | SEC24D   |
| ATF6 | SEC31A   |
| ATF6 | SEC61A1  |
| ATF6 | SEC61B   |
| ATF6 | SEC61G   |
| ATF6 | SEC62    |
| ATF6 | SEC63    |
| ATF6 | SEL1L    |
| ATF6 | SEL1L3   |
| ATF6 | SELPLG   |
| ATF6 | SERF2    |
| ATF6 | SERGEF   |
| ATF6 | SERP1    |
| ATF6 | SETD3    |
| ATF6 | SF3A3    |
| ATF6 | SF3B2    |
| ATF6 | SF3B5    |
| ATF6 | SFMBT2   |
| ATF6 | SGK1     |
| ATF6 | SGK3     |
| ATF6 | SH3GLB1  |
| ATF6 | SHC1     |
| ATF6 | SHR00M1  |
| ATF6 | SIL1     |
| ATF6 | SIPA1L3  |
| ATF6 | SIRT2    |
| ATF6 | SKAP1    |
| ATF6 | SLAMF7   |
| ATF6 | SLC10A7  |
| ATF6 | SLC11A2  |
| ATF6 | SLC15A3  |
| ATF6 | SLC16A3  |
| ATF6 | SLC17A9  |
| ATF6 | SLC1A4   |
| ATF6 | SLC1A5   |
| ATF6 | SLC25A28 |
| ATF6 | SLC25A39 |
| ATF6 | SLC25A4  |
| ATF6 | SLC25A44 |
| ATF6 | SLC25A45 |
| ATF6 | SLC30A5  |
| ATF6 | SLC33A1  |
| ATF6 | SLC35A2  |
| ATF6 | SLC35A3  |
| ATF6 | SLC35B1  |
| ATF6 | SLC35C1  |
| ATF6 | SLC35C2  |
| ATF6 | SLC35F2  |

|      |           |
|------|-----------|
| ATF6 | SLC38A10  |
| ATF6 | SLC38A2   |
| ATF6 | SLC38A9   |
| ATF6 | SLC39A11  |
| ATF6 | SLC39A7   |
| ATF6 | SLC39A8   |
| ATF6 | SLC3A2    |
| ATF6 | SLC44A1   |
| ATF6 | SLC7A7    |
| ATF6 | SLC03A1   |
| ATF6 | SMCHD1    |
| ATF6 | SMDT1     |
| ATF6 | SMPD1     |
| ATF6 | SMUG1     |
| ATF6 | SNAI3-AS1 |
| ATF6 | SND1      |
| ATF6 | SND1-IT1  |
| ATF6 | SNHG9     |
| ATF6 | SNRPN     |
| ATF6 | SNU13     |
| ATF6 | SNX13     |
| ATF6 | SOCS3     |
| ATF6 | SP140L    |
| ATF6 | SPAG7     |
| ATF6 | SPAG9     |
| ATF6 | SPATC1L   |
| ATF6 | SPATS2    |
| ATF6 | SPCS1     |
| ATF6 | SPIN2B    |
| ATF6 | SPINT2    |
| ATF6 | SPN       |
| ATF6 | SPNS1     |
| ATF6 | SP0P      |
| ATF6 | SPTSSA    |
| ATF6 | SQSTM1    |
| ATF6 | SRGN      |
| ATF6 | SRM       |
| ATF6 | SRP19     |
| ATF6 | SRP54     |
| ATF6 | SRP68     |
| ATF6 | SRP72     |
| ATF6 | SRPRA     |
| ATF6 | SRSF5     |
| ATF6 | SSFA2     |
| ATF6 | SSR1      |
| ATF6 | SSR3      |
| ATF6 | SSR4      |
| ATF6 | SSSCA1    |
| ATF6 | SSU72     |
| ATF6 | ST6GAL1   |

|      |              |
|------|--------------|
| ATF6 | ST6GALNAC4   |
| ATF6 | STARD10      |
| ATF6 | STK17B       |
| ATF6 | STK4         |
| ATF6 | STT3A        |
| ATF6 | STT3B        |
| ATF6 | STX11        |
| ATF6 | STX5         |
| ATF6 | STXBP6       |
| ATF6 | SUB1         |
| ATF6 | SUC0         |
| ATF6 | SURF4        |
| ATF6 | SYNE3        |
| ATF6 | SYNGR1       |
| ATF6 | SYNRG        |
| ATF6 | SYTL1        |
| ATF6 | SYVN1        |
| ATF6 | TAF8         |
| ATF6 | TBC1D23      |
| ATF6 | TBL2         |
| ATF6 | TCF25        |
| ATF6 | TCF4         |
| ATF6 | TCIRG1       |
| ATF6 | TCTA         |
| ATF6 | TES          |
| ATF6 | TFG          |
| ATF6 | THAP11       |
| ATF6 | THAP2        |
| ATF6 | THAP7        |
| ATF6 | THEMIS2      |
| ATF6 | THTPA        |
| ATF6 | TIMM17A      |
| ATF6 | TIMP1        |
| ATF6 | TM9SF2       |
| ATF6 | TM9SF3       |
| ATF6 | TM9SF4       |
| ATF6 | TMBIM6       |
| ATF6 | TMCC1        |
| ATF6 | TMC01        |
| ATF6 | TMED10       |
| ATF6 | TMED2        |
| ATF6 | TMED3        |
| ATF6 | TMED4        |
| ATF6 | TMED7        |
| ATF6 | TMED9        |
| ATF6 | TMEM120B     |
| ATF6 | TMEM147      |
| ATF6 | TMEM161B     |
| ATF6 | TMEM161B-AS1 |
| ATF6 | TMEM165      |

|      |          |
|------|----------|
| ATF6 | TMEM167A |
| ATF6 | TMEM184B |
| ATF6 | TMEM214  |
| ATF6 | TMEM219  |
| ATF6 | TMEM230  |
| ATF6 | TMEM248  |
| ATF6 | TMEM258  |
| ATF6 | TMEM263  |
| ATF6 | TMEM30A  |
| ATF6 | TMEM33   |
| ATF6 | TMEM39A  |
| ATF6 | TMEM59   |
| ATF6 | TMEM70   |
| ATF6 | TMEM9    |
| ATF6 | TMF1     |
| ATF6 | TNFAIP3  |
| ATF6 | TNFRSF17 |
| ATF6 | TNFSF8   |
| ATF6 | TNP02    |
| ATF6 | TOLLIP   |
| ATF6 | TOR1AIP2 |
| ATF6 | TOR3A    |
| ATF6 | TPD52    |
| ATF6 | TPD52L2  |
| ATF6 | TPST2    |
| ATF6 | TPT1     |
| ATF6 | TRAF3    |
| ATF6 | TRAM1    |
| ATF6 | TRAM2    |
| ATF6 | TRANK1   |
| ATF6 | TRAPPC2L |
| ATF6 | TRAPPC6A |
| ATF6 | TRIB1    |
| ATF6 | TRIM27   |
| ATF6 | TRIM33   |
| ATF6 | TRMT44   |
| ATF6 | TRPM4    |
| ATF6 | TRPT1    |
| ATF6 | TSC22D3  |
| ATF6 | TSC22D4  |
| ATF6 | TSPAN13  |
| ATF6 | TTC3     |
| ATF6 | TWSG1    |
| ATF6 | TXLNA    |
| ATF6 | TXNDC11  |
| ATF6 | TXNDC15  |
| ATF6 | TXNDC5   |
| ATF6 | UAP1     |
| ATF6 | UBA5     |
| ATF6 | UBA6-AS1 |

|      |          |
|------|----------|
| ATF6 | UBC      |
| ATF6 | UBE2D3   |
| ATF6 | UBE2H    |
| ATF6 | UBE2J1   |
| ATF6 | UBE2Q1   |
| ATF6 | UBE3A    |
| ATF6 | UBL5     |
| ATF6 | UBQLN1   |
| ATF6 | UBXN4    |
| ATF6 | UFC1     |
| ATF6 | UFL1     |
| ATF6 | UFM1     |
| ATF6 | UFSP2    |
| ATF6 | UNC50    |
| ATF6 | UNKL     |
| ATF6 | UPF2     |
| ATF6 | UQCC2    |
| ATF6 | UQCR11   |
| ATF6 | UQCRH    |
| ATF6 | UR0S     |
| ATF6 | US01     |
| ATF6 | USP21    |
| ATF6 | USP24    |
| ATF6 | USP48    |
| ATF6 | UTP11    |
| ATF6 | UTP14A   |
| ATF6 | VARS2    |
| ATF6 | VCP      |
| ATF6 | VDAC2    |
| ATF6 | VDR      |
| ATF6 | VK0RC1   |
| ATF6 | VK0RC1L1 |
| ATF6 | VOPP1    |
| ATF6 | WDR43    |
| ATF6 | WDR89    |
| ATF6 | WDR91    |
| ATF6 | WIPI1    |
| ATF6 | WNT10A   |
| ATF6 | WSB2     |
| ATF6 | WWOX     |
| ATF6 | XRRA1    |
| ATF6 | YIF1A    |
| ATF6 | YIF1B    |
| ATF6 | YIPF1    |
| ATF6 | YIPF2    |
| ATF6 | YIPF3    |
| ATF6 | YIPF5    |
| ATF6 | YIPF6    |
| ATF6 | YKT6     |
| ATF6 | YPEL5    |

|       |         |
|-------|---------|
| ATF6  | ZBP1    |
| ATF6  | ZBTB38  |
| ATF6  | ZDHHC4  |
| ATF6  | ZDHHC7  |
| ATF6  | ZFAND2A |
| ATF6  | ZFAT    |
| ATF6  | ZFP36L2 |
| ATF6  | ZFYVE27 |
| ATF6  | ZMYND11 |
| ATF6  | ZNF264  |
| ATF6  | ZNF275  |
| ATF6  | ZNF3    |
| ATF6  | ZNF37A  |
| ATF6  | ZNF436  |
| ATF6  | ZNF593  |
| ATF6  | ZNF639  |
| ATF6  | ZNF691  |
| ATF6  | ZNF706  |
| ATF6  | ZNF71   |
| ATF6  | ZNF841  |
| ATF6  | ZNF844  |
| ATF6  | ZNHIT1  |
| ATF6B | C5orf51 |
| ATF6B | CBX8    |
| ATF6B | CEP120  |
| ATF6B | CHSY1   |
| ATF6B | CLCN3   |
| ATF6B | CTHRC1  |
| ATF6B | CTNNA1  |
| ATF6B | EFNA3   |
| ATF6B | FAM78A  |
| ATF6B | GCN1    |
| ATF6B | LEKR1   |
| ATF6B | LPIN1   |
| ATF6B | MTHFR   |
| ATF6B | POPDC2  |
| ATF6B | QKI     |
| ATF6B | RPS29   |
| ATF6B | SLC16A3 |
| ATF6B | TM9SF1  |
| ATF6B | ZFX     |
| BACH1 | ABHD5   |
| BACH1 | ABHD6   |
| BACH1 | ANG     |
| BACH1 | ANKHD1  |
| BACH1 | ANKRD12 |
| BACH1 | ATF3    |
| BACH1 | ATP6V1F |
| BACH1 | B9D1    |
| BACH1 | BACH1   |

|       |          |
|-------|----------|
| BACH1 | BNIP3L   |
| BACH1 | CCDC50   |
| BACH1 | CCR7     |
| BACH1 | CD63     |
| BACH1 | CHD2     |
| BACH1 | CHD6     |
| BACH1 | CLCN6    |
| BACH1 | COCH     |
| BACH1 | CSNK2A1  |
| BACH1 | DDI2     |
| BACH1 | DNAJB12  |
| BACH1 | EBI3     |
| BACH1 | EIF1AX   |
| BACH1 | ERN1     |
| BACH1 | FLCN     |
| BACH1 | FMR1     |
| BACH1 | FOSL1    |
| BACH1 | GNL3L    |
| BACH1 | GOLIM4   |
| BACH1 | GPBR1    |
| BACH1 | GPR18    |
| BACH1 | GRN      |
| BACH1 | HEXA     |
| BACH1 | IER3     |
| BACH1 | IFI30    |
| BACH1 | IFRD2    |
| BACH1 | KCNG1    |
| BACH1 | KLF13    |
| BACH1 | KMT2E    |
| BACH1 | KPNA4    |
| BACH1 | MAPK6    |
| BACH1 | MIR155HG |
| BACH1 | NEAT1    |
| BACH1 | NUDT19   |
| BACH1 | PPP3CA   |
| BACH1 | PRKAG2   |
| BACH1 | PVT1     |
| BACH1 | RAB40C   |
| BACH1 | RBBP6    |
| BACH1 | RBM15B   |
| BACH1 | RBM47    |
| BACH1 | RENBP    |
| BACH1 | RIN3     |
| BACH1 | RNF115   |
| BACH1 | SEMA7A   |
| BACH1 | SIRT2    |
| BACH1 | SLC44A1  |
| BACH1 | SPRED2   |
| BACH1 | SQSTM1   |
| BACH1 | STK4     |



|       |          |
|-------|----------|
| BACH1 | STX6     |
| BACH1 | SUN2     |
| BACH1 | SYNRG    |
| BACH1 | TCAF1    |
| BACH1 | TMEM214  |
| BACH1 | TNFAIP3  |
| BACH1 | TP53INP1 |
| BACH1 | TRAF1    |
| BACH1 | WDR81    |
| BACH1 | XIAP     |
| BACH2 | BACH2    |
| BACH2 | CENPE    |
| BACH2 | MARCH1   |
| BACH2 | RIMKLB   |
| BACH2 | SYT11    |
| BATF  | AHR      |
| BATF  | BCL2A1   |
| BATF  | CCL4     |
| BATF  | DNAJB5   |
| BATF  | E4F1     |
| BATF  | ETF1     |
| BATF  | GPAM     |
| BATF  | GTF2H1   |
| BATF  | GTF3C2   |
| BATF  | NFKBID   |
| BATF  | PLK3     |
| BATF  | PUM3     |
| BATF  | RCL1     |
| BATF  | RRP1B    |
| BATF  | WDR4     |
| BATF  | ZNF593   |
| BATF  | ZNF711   |
| BATF3 | AARS     |
| BATF3 | ABCE1    |
| BATF3 | ACSL1    |
| BATF3 | ANKRD11  |
| BATF3 | ANP32B   |
| BATF3 | ASNS     |
| BATF3 | ATF5     |
| BATF3 | ATP1B3   |
| BATF3 | ATXN1    |
| BATF3 | B3GLCT   |
| BATF3 | BUD31    |
| BATF3 | C1orf174 |
| BATF3 | CAMK2B   |
| BATF3 | CAMKK1   |
| BATF3 | CCND2    |
| BATF3 | CD44     |
| BATF3 | CDIPT    |
| BATF3 | CEBPB    |

|       |            |
|-------|------------|
| BATF3 | CSGALNACT2 |
| BATF3 | CYCS       |
| BATF3 | DDIT3      |
| BATF3 | DDIT4      |
| BATF3 | DDX49      |
| BATF3 | DGAT2      |
| BATF3 | DRAM1      |
| BATF3 | EIF1       |
| BATF3 | EIF2S2     |
| BATF3 | EIF4EBP1   |
| BATF3 | ETF1       |
| BATF3 | FAM110A    |
| BATF3 | FIGNL1     |
| BATF3 | FOXP1      |
| BATF3 | GARS       |
| BATF3 | GART       |
| BATF3 | GCFC2      |
| BATF3 | GHITM      |
| BATF3 | GLRX2      |
| BATF3 | GNL2       |
| BATF3 | GOT1       |
| BATF3 | GPRC5C     |
| BATF3 | GSPT1      |
| BATF3 | HNRNPU     |
| BATF3 | HSP90AB1   |
| BATF3 | HSPA9      |
| BATF3 | HSPBP1     |
| BATF3 | HSPD1      |
| BATF3 | ID3        |
| BATF3 | LARS       |
| BATF3 | LDHA       |
| BATF3 | LIG3       |
| BATF3 | LIN9       |
| BATF3 | LSM2       |
| BATF3 | MAGOH      |
| BATF3 | MAML2      |
| BATF3 | MCU        |
| BATF3 | MIF        |
| BATF3 | MMAB       |
| BATF3 | N6AMT1     |
| BATF3 | NABP1      |
| BATF3 | NEDD1      |
| BATF3 | NEDD4L     |
| BATF3 | NFE2L1     |
| BATF3 | NOLC1      |
| BATF3 | NOTCH2     |
| BATF3 | NUP133     |
| BATF3 | NUP214     |
| BATF3 | ODC1       |
| BATF3 | OXSRI      |

|        |             |
|--------|-------------|
| BATF3  | PAK1IP1     |
| BATF3  | PARVB       |
| BATF3  | PCK2        |
| BATF3  | PDAP1       |
| BATF3  | PHGDH       |
| BATF3  | PKM         |
| BATF3  | PRELID3B    |
| BATF3  | PRMT1       |
| BATF3  | PRR5        |
| BATF3  | PRRC2A      |
| BATF3  | PSMD14      |
| BATF3  | PUM3        |
| BATF3  | RAD23A      |
| BATF3  | RAD9A       |
| BATF3  | RAN         |
| BATF3  | RCN1        |
| BATF3  | RNMT        |
| BATF3  | RRP1B       |
| BATF3  | RUNX3       |
| BATF3  | RUVBL1      |
| BATF3  | SARS        |
| BATF3  | SH3RF1      |
| BATF3  | SHMT2       |
| BATF3  | SKAP1       |
| BATF3  | SLC1A5      |
| BATF3  | SLC37A1     |
| BATF3  | SLC3A2      |
| BATF3  | SLC6A9      |
| BATF3  | SMKR1       |
| BATF3  | SNHG15      |
| BATF3  | SNX12       |
| BATF3  | SRSF3       |
| BATF3  | SSRP1       |
| BATF3  | TBL3        |
| BATF3  | TES         |
| BATF3  | THOC1       |
| BATF3  | TMEM147     |
| BATF3  | TMEM147-AS1 |
| BATF3  | TRMT61A     |
| BATF3  | TWISTNB     |
| BATF3  | UBA6        |
| BATF3  | UBE2B       |
| BATF3  | WARS        |
| BATF3  | WDR82       |
| BATF3  | ZFP91       |
| BATF3  | ZFYVE9      |
| BATF3  | ZNF470      |
| BATF3  | ZNF593      |
| BATF3  | ZNFX1       |
| BCL11A | ABCD4       |

BCL11A ABI2  
BCL11A ACSM3  
BCL11A ACTB  
BCL11A ACTR2  
BCL11A ADAM28  
BCL11A ADD3  
BCL11A ADNP  
BCL11A AFF3  
BCL11A AFTPH  
BCL11A AGA  
BCL11A AHNAK  
BCL11A AKAP13  
BCL11A AKAP7  
BCL11A AKNA  
BCL11A ALOX5  
BCL11A ALOX5AP  
BCL11A AMFR  
BCL11A ANGPT2  
BCL11A ANKRD40  
BCL11A ANKRD44  
BCL11A AP1M1  
BCL11A AP4E1  
BCL11A APBB1IP  
BCL11A ARF6  
BCL11A ARHGAP17  
BCL11A ARHGAP22  
BCL11A ARHGAP30  
BCL11A ARHGAP9  
BCL11A ARHGEF7  
BCL11A ARID1A  
BCL11A ARID4B  
BCL11A ARL6IP5  
BCL11A ARPC1B  
BCL11A ARPC3  
BCL11A ARPC4  
BCL11A ASAP1  
BCL11A ASB16-AS1  
BCL11A ASB7  
BCL11A ASPH  
BCL11A ATF7IP  
BCL11A ATP6V1E2  
BCL11A B4GALT1  
BCL11A BACH2  
BCL11A BANK1  
BCL11A BAZ2A  
BCL11A BBX  
BCL11A BCL11A  
BCL11A BEND5  
BCL11A BIRC3  
BCL11A BLCAP

|        |           |
|--------|-----------|
| BCL11A | BLK       |
| BCL11A | BL0C1S5   |
| BCL11A | BMF       |
| BCL11A | BNIP3L    |
| BCL11A | BORCS5    |
| BCL11A | BRK1      |
| BCL11A | BR0X      |
| BCL11A | BRWD3     |
| BCL11A | BTG1      |
| BCL11A | BTK       |
| BCL11A | C16orf54  |
| BCL11A | C16orf74  |
| BCL11A | C5orf51   |
| BCL11A | C6orf62   |
| BCL11A | CALHM2    |
| BCL11A | CAPZA1    |
| BCL11A | CASP2     |
| BCL11A | CASP4     |
| BCL11A | CBFA2T3   |
| BCL11A | CBL       |
| BCL11A | CBLB      |
| BCL11A | CBWD3     |
| BCL11A | CCDC107   |
| BCL11A | CCDC6     |
| BCL11A | CCDC93    |
| BCL11A | CCNI      |
| BCL11A | CCR6      |
| BCL11A | CCZ1      |
| BCL11A | CD180     |
| BCL11A | CD19      |
| BCL11A | CD22      |
| BCL11A | CD37      |
| BCL11A | CD48      |
| BCL11A | CD52      |
| BCL11A | CD72      |
| BCL11A | CD74      |
| BCL11A | CD79B     |
| BCL11A | CDC42     |
| BCL11A | CDC42SE1  |
| BCL11A | CDK13     |
| BCL11A | CDK14     |
| BCL11A | CFL2      |
| BCL11A | CHI3L2    |
| BCL11A | CHMP1B    |
| BCL11A | CKMT2-AS1 |
| BCL11A | CNEP1R1   |
| BCL11A | CNN2      |
| BCL11A | CNOT8     |
| BCL11A | CNR2      |
| BCL11A | COMMD6    |

|        |          |
|--------|----------|
| BCL11A | COR01A   |
| BCL11A | CPD      |
| BCL11A | CPNE5    |
| BCL11A | CPSF2    |
| BCL11A | CREB1    |
| BCL11A | CREBRF   |
| BCL11A | CRIP3    |
| BCL11A | CS       |
| BCL11A | CSK      |
| BCL11A | CSNK1A1  |
| BCL11A | CTDNEP1  |
| BCL11A | CTDSP1   |
| BCL11A | CTDSP2   |
| BCL11A | CTNNB1   |
| BCL11A | CTNND1   |
| BCL11A | CTSS     |
| BCL11A | CTSZ     |
| BCL11A | CXCR4    |
| BCL11A | CXCR5    |
| BCL11A | CXXC5    |
| BCL11A | CYB561A3 |
| BCL11A | CYBB     |
| BCL11A | CYFIP2   |
| BCL11A | CYP20A1  |
| BCL11A | CYTIP    |
| BCL11A | DAAM1    |
| BCL11A | DALRD3   |
| BCL11A | DAPP1    |
| BCL11A | DAZAP2   |
| BCL11A | DBNL     |
| BCL11A | DCLRE1C  |
| BCL11A | DCUN1D1  |
| BCL11A | DDB1     |
| BCL11A | DEDD     |
| BCL11A | DEF8     |
| BCL11A | DENND3   |
| BCL11A | DGKZ     |
| BCL11A | DLEU2    |
| BCL11A | DMXL1    |
| BCL11A | DOCK8    |
| BCL11A | DPEP2    |
| BCL11A | DPYSL2   |
| BCL11A | DSTYK    |
| BCL11A | DYRK1A   |
| BCL11A | E2F3     |
| BCL11A | EEF1A1   |
| BCL11A | EIF2S3   |
| BCL11A | EIF3H    |
| BCL11A | EIF3L    |
| BCL11A | EIF4EBP2 |

|        |            |
|--------|------------|
| BCL11A | ELF1       |
| BCL11A | ELMSAN1    |
| BCL11A | ELOVL5     |
| BCL11A | EMILIN2    |
| BCL11A | EPC1       |
| BCL11A | EPSTI1     |
| BCL11A | ERP29      |
| BCL11A | EXOC5      |
| BCL11A | EXOC6      |
| BCL11A | EXOC7      |
| BCL11A | FAM102A    |
| BCL11A | FAM107B    |
| BCL11A | FAM184A    |
| BCL11A | FAM20B     |
| BCL11A | FAM76B     |
| BCL11A | FAM81A     |
| BCL11A | FAM96A     |
| BCL11A | FANCI      |
| BCL11A | FAU        |
| BCL11A | FBR5       |
| BCL11A | FBRSL1     |
| BCL11A | FBXL20     |
| BCL11A | FBXW4      |
| BCL11A | FCMR       |
| BCL11A | FCRL1      |
| BCL11A | FCRLA      |
| BCL11A | FGD2       |
| BCL11A | FIS1       |
| BCL11A | FKBP15     |
| BCL11A | FMNL1      |
| BCL11A | FMR1       |
| BCL11A | FNTA       |
| BCL11A | FOS        |
| BCL11A | FOXN2      |
| BCL11A | FOXO1      |
| BCL11A | FOXP1      |
| BCL11A | FRYL       |
| BCL11A | FXD5       |
| BCL11A | GABPB1-AS1 |
| BCL11A | GALNT3     |
| BCL11A | GBA        |
| BCL11A | GCC2       |
| BCL11A | GCH1       |
| BCL11A | GDI2       |
| BCL11A | GGA2       |
| BCL11A | GIN1       |
| BCL11A | GIT2       |
| BCL11A | GLIPR1     |
| BCL11A | GMFG       |
| BCL11A | GNAI2      |

|        |         |
|--------|---------|
| BCL11A | GNGT2   |
| BCL11A | GPAM    |
| BCL11A | GPM6B   |
| BCL11A | GPR160  |
| BCL11A | GPR18   |
| BCL11A | GPSM3   |
| BCL11A | GRAP    |
| BCL11A | GRIPAP1 |
| BCL11A | GRN     |
| BCL11A | GSDMD   |
| BCL11A | GSTM4   |
| BCL11A | GTF2I   |
| BCL11A | HAGHL   |
| BCL11A | HCLS1   |
| BCL11A | HDAC7   |
| BCL11A | HERC2   |
| BCL11A | HERC4   |
| BCL11A | HIVEP2  |
| BCL11A | HLA-DMB |
| BCL11A | HLA-DRA |
| BCL11A | HMOX1   |
| BCL11A | HNRNP1  |
| BCL11A | HXA7    |
| BCL11A | HPCAL1  |
| BCL11A | HVCN1   |
| BCL11A | IFI16   |
| BCL11A | IFIT1   |
| BCL11A | IFITM2  |
| BCL11A | IGF2BP1 |
| BCL11A | IGSF8   |
| BCL11A | IKZF1   |
| BCL11A | IKZF3   |
| BCL11A | IL10RA  |
| BCL11A | IL13RA1 |
| BCL11A | IL16    |
| BCL11A | IL4R    |
| BCL11A | IL6ST   |
| BCL11A | INF2    |
| BCL11A | INPP5B  |
| BCL11A | INPP5D  |
| BCL11A | ISG20   |
| BCL11A | ITGA4   |
| BCL11A | ITGB1   |
| BCL11A | ITSN2   |
| BCL11A | JADE2   |
| BCL11A | JAK2    |
| BCL11A | JAK3    |
| BCL11A | JMJD1C  |
| BCL11A | JUND    |
| BCL11A | KANSL1  |



BCL11A KDM2A  
BCL11A KHNYN  
BCL11A KIAA1109  
BCL11A KLF12  
BCL11A KLF2  
BCL11A KLF6  
BCL11A KLF7  
BCL11A KLHL5  
BCL11A L3MBTL2  
BCL11A LAMTOR2  
BCL11A LAPTM5  
BCL11A LBH  
BCL11A LCOR  
BCL11A LDB1  
BCL11A LGALS9  
BCL11A LILRB1  
BCL11A LIMD2  
BCL11A LIMK2  
BCL11A LIPA  
BCL11A LMAN2L  
BCL11A LM02  
BCL11A LPIN1  
BCL11A LPP  
BCL11A LRBA  
BCL11A LRP10  
BCL11A LRRC75A  
BCL11A LSR  
BCL11A LST1  
BCL11A LTA4H  
BCL11A LTB  
BCL11A LTB4R  
BCL11A LY6E  
BCL11A LY86  
BCL11A LYL1  
BCL11A LYN  
BCL11A LYRM1  
BCL11A LYSMD2  
BCL11A MALT1  
BCL11A MAN2A1  
BCL11A MANBA  
BCL11A MAP4K2  
BCL11A MAPK10  
BCL11A MAPK3  
BCL11A MARCH1  
BCL11A MARCKSL1  
BCL11A MAST3  
BCL11A MBNL1  
BCL11A MBOAT2  
BCL11A MDM4  
BCL11A MED23

|        |          |
|--------|----------|
| BCL11A | MED29    |
| BCL11A | MEF2A    |
| BCL11A | MEF2C    |
| BCL11A | MEIOG    |
| BCL11A | METTL7A  |
| BCL11A | MFN2     |
| BCL11A | MILR1    |
| BCL11A | MLXIP    |
| BCL11A | MORC3    |
| BCL11A | MPZL3    |
| BCL11A | MS4A1    |
| BCL11A | MTMR14   |
| BCL11A | MTPN     |
| BCL11A | MX1      |
| BCL11A | MYH10    |
| BCL11A | MYL12A   |
| BCL11A | MYO1E    |
| BCL11A | N4BP2L2  |
| BCL11A | NACA     |
| BCL11A | NCF1     |
| BCL11A | NCF4     |
| BCL11A | NCKIPSD  |
| BCL11A | NCOA3    |
| BCL11A | NEMF     |
| BCL11A | NIPBL    |
| BCL11A | NLRP1    |
| BCL11A | NPTX2    |
| BCL11A | NR3C1    |
| BCL11A | NT5C3A   |
| BCL11A | NUB1     |
| BCL11A | NUGGC    |
| BCL11A | NUMB     |
| BCL11A | OARD1    |
| BCL11A | ORAI3    |
| BCL11A | OSBP1L1  |
| BCL11A | OTUD1    |
| BCL11A | PABPC1   |
| BCL11A | PAFAH1B2 |
| BCL11A | PAN3     |
| BCL11A | PAQR8    |
| BCL11A | PARP3    |
| BCL11A | PBX2     |
| BCL11A | PCBP2    |
| BCL11A | PCF11    |
| BCL11A | PDE7A    |
| BCL11A | PDLIM1   |
| BCL11A | PDLIM2   |
| BCL11A | PFDN5    |
| BCL11A | PHF14    |
| BCL11A | PHF20    |

|        |           |
|--------|-----------|
| BCL11A | PHF3      |
| BCL11A | PHIP      |
| BCL11A | PIK3AP1   |
| BCL11A | PIP4K2A   |
| BCL11A | PKIG      |
| BCL11A | PKN1      |
| BCL11A | PKN2      |
| BCL11A | PLA2G15   |
| BCL11A | PLA2G6    |
| BCL11A | PLAC8     |
| BCL11A | PLEKHA2   |
| BCL11A | PLEKHF2   |
| BCL11A | PLEKHG1   |
| BCL11A | PLSCR1    |
| BCL11A | PLXNC1    |
| BCL11A | PML       |
| BCL11A | PNISR     |
| BCL11A | PNKD      |
| BCL11A | PNP       |
| BCL11A | PNRC1     |
| BCL11A | POGZ      |
| BCL11A | POLD4     |
| BCL11A | POU2F2    |
| BCL11A | PPM1K     |
| BCL11A | PPM1N     |
| BCL11A | PPP1R18   |
| BCL11A | PPP1R3E   |
| BCL11A | PPP2R5E   |
| BCL11A | PPP3CA    |
| BCL11A | PPP6R1    |
| BCL11A | PQLC1     |
| BCL11A | PRADC1    |
| BCL11A | PRDM2     |
| BCL11A | PREX1     |
| BCL11A | PRKCB     |
| BCL11A | PRMT2     |
| BCL11A | PRPF4B    |
| BCL11A | PSMB8     |
| BCL11A | PTAFR     |
| BCL11A | PTBP3     |
| BCL11A | PTK2B     |
| BCL11A | PTPN22    |
| BCL11A | PTPN4     |
| BCL11A | PTPN6     |
| BCL11A | PTPN9     |
| BCL11A | PTPRC     |
| BCL11A | PTTG1IP   |
| BCL11A | PUS10     |
| BCL11A | R3HDM4    |
| BCL11A | RAB11FIP4 |

|        |         |
|--------|---------|
| BCL11A | RAB1B   |
| BCL11A | RAB28   |
| BCL11A | RAB31   |
| BCL11A | RAB33A  |
| BCL11A | RAB37   |
| BCL11A | RABEP2  |
| BCL11A | RAC2    |
| BCL11A | RACK1   |
| BCL11A | RAD18   |
| BCL11A | RALGPS2 |
| BCL11A | RAP2B   |
| BCL11A | RAP2C   |
| BCL11A | RASA1   |
| BCL11A | RASGRP2 |
| BCL11A | RASGRP3 |
| BCL11A | RBCK1   |
| BCL11A | RBF0X2  |
| BCL11A | RBM38   |
| BCL11A | RCAN3   |
| BCL11A | RCSD1   |
| BCL11A | RERE    |
| BCL11A | RFX1    |
| BCL11A | RFX5    |
| BCL11A | RGL2    |
| BCL11A | RHBDD1  |
| BCL11A | RHBDF2  |
| BCL11A | RHOBTB2 |
| BCL11A | RH0H    |
| BCL11A | RIC1    |
| BCL11A | RINL    |
| BCL11A | RNASE6  |
| BCL11A | RNF13   |
| BCL11A | RNF24   |
| BCL11A | ROCK1   |
| BCL11A | RPL10   |
| BCL11A | RPL10A  |
| BCL11A | RPL11   |
| BCL11A | RPL13   |
| BCL11A | RPL13A  |
| BCL11A | RPL15   |
| BCL11A | RPL17   |
| BCL11A | RPL18A  |
| BCL11A | RPL19   |
| BCL11A | RPL23   |
| BCL11A | RPL26   |
| BCL11A | RPL27   |
| BCL11A | RPL28   |
| BCL11A | RPL32   |
| BCL11A | RPL34   |
| BCL11A | RPL35   |

|        |          |
|--------|----------|
| BCL11A | RPL35A   |
| BCL11A | RPL37    |
| BCL11A | RPL37A   |
| BCL11A | RPL38    |
| BCL11A | RPL4     |
| BCL11A | RPL41    |
| BCL11A | RPL6     |
| BCL11A | RPL7     |
| BCL11A | RPLP2    |
| BCL11A | RPS10    |
| BCL11A | RPS11    |
| BCL11A | RPS13    |
| BCL11A | RPS15    |
| BCL11A | RPS17    |
| BCL11A | RPS18    |
| BCL11A | RPS19    |
| BCL11A | RPS20    |
| BCL11A | RPS21    |
| BCL11A | RPS25    |
| BCL11A | RPS27    |
| BCL11A | RPS27A   |
| BCL11A | RPS3     |
| BCL11A | RPS3A    |
| BCL11A | RPS5     |
| BCL11A | RPS6     |
| BCL11A | RPS6KA1  |
| BCL11A | RPS8     |
| BCL11A | RXRB     |
| BCL11A | S1PR2    |
| BCL11A | SAMD10   |
| BCL11A | SAMHD1   |
| BCL11A | SCAF11   |
| BCL11A | SCAF4    |
| BCL11A | SCAMP2   |
| BCL11A | SCIMP    |
| BCL11A | SCOC-AS1 |
| BCL11A | SEC22B   |
| BCL11A | SELL     |
| BCL11A | SEPT6    |
| BCL11A | SEPT9    |
| BCL11A | SERTAD2  |
| BCL11A | SESN3    |
| BCL11A | SF1      |
| BCL11A | SGMS1    |
| BCL11A | SH2B1    |
| BCL11A | SH3BGRL  |
| BCL11A | SH3BP5   |
| BCL11A | SH3KBP1  |
| BCL11A | SIAH1    |
| BCL11A | SIPA1    |

|        |          |
|--------|----------|
| BCL11A | SKAP2    |
| BCL11A | SLC25A22 |
| BCL11A | SLC2A6   |
| BCL11A | SLC35F6  |
| BCL11A | SLC39A13 |
| BCL11A | SLC9A7   |
| BCL11A | SMARCA2  |
| BCL11A | SMARCD2  |
| BCL11A | SMC6     |
| BCL11A | SMIM14   |
| BCL11A | SNAP23   |
| BCL11A | SNRNP200 |
| BCL11A | SNX2     |
| BCL11A | SNX22    |
| BCL11A | SNX3     |
| BCL11A | SOX4     |
| BCL11A | SP1      |
| BCL11A | SP100    |
| BCL11A | SP110    |
| BCL11A | SP140    |
| BCL11A | SPI1     |
| BCL11A | SPTLC2   |
| BCL11A | SRPK2    |
| BCL11A | SRSF6    |
| BCL11A | ST3GAL2  |
| BCL11A | STAG2    |
| BCL11A | STAP1    |
| BCL11A | STIL     |
| BCL11A | STK4     |
| BCL11A | STRN     |
| BCL11A | STX7     |
| BCL11A | SULF2    |
| BCL11A | SUN2     |
| BCL11A | SYK      |
| BCL11A | SYPL1    |
| BCL11A | SYTL1    |
| BCL11A | SYVN1    |
| BCL11A | TAB2     |
| BCL11A | TADA3    |
| BCL11A | TAF13    |
| BCL11A | TAGAP    |
| BCL11A | TBC1D10B |
| BCL11A | TBC1D10C |
| BCL11A | TCF3     |
| BCL11A | THOC5    |
| BCL11A | THTPA    |
| BCL11A | TLN1     |
| BCL11A | TLR10    |
| BCL11A | TMC6     |
| BCL11A | TMEM156  |

|        |           |
|--------|-----------|
| BCL11A | TMEM168   |
| BCL11A | TMEM256   |
| BCL11A | TMSB4X    |
| BCL11A | TNFAIP8L2 |
| BCL11A | TNFRSF13C |
| BCL11A | TNRC6B    |
| BCL11A | TOB1      |
| BCL11A | TPCN1     |
| BCL11A | TRAF3IP3  |
| BCL11A | TRAF5     |
| BCL11A | TRAPPC1   |
| BCL11A | TRIM22    |
| BCL11A | TSC22D3   |
| BCL11A | TSC22D4   |
| BCL11A | TSPAN3    |
| BCL11A | TTC14     |
| BCL11A | TTC17     |
| BCL11A | TTC39C    |
| BCL11A | TTC9C     |
| BCL11A | TTL       |
| BCL11A | TTLL3     |
| BCL11A | TTPAL     |
| BCL11A | UBA6      |
| BCL11A | UBE4B     |
| BCL11A | UBR5      |
| BCL11A | UBR7      |
| BCL11A | UBXN1     |
| BCL11A | UCP2      |
| BCL11A | UNC119    |
| BCL11A | UNC93B1   |
| BCL11A | USF2      |
| BCL11A | USP15     |
| BCL11A | USP6NL    |
| BCL11A | UVRAG     |
| BCL11A | VAV1      |
| BCL11A | VAV2      |
| BCL11A | WAS       |
| BCL11A | WDR66     |
| BCL11A | WIPF1     |
| BCL11A | XAF1      |
| BCL11A | XPR1      |
| BCL11A | YPEL5     |
| BCL11A | YWHAZ     |
| BCL11A | ZBTB20    |
| BCL11A | ZBTB25    |
| BCL11A | ZBTB44    |
| BCL11A | ZC3H12D   |
| BCL11A | ZC3HAV1   |
| BCL11A | ZDHHC2    |
| BCL11A | ZDHHC21   |

BCL11A ZFAND6  
BCL11A ZFAS1  
BCL11A ZFX  
BCL11A ZMIZ1  
BCL11A ZNF296  
BCL11A ZNF318  
BCL11A ZNF335  
BCL11A ZNF35  
BCL11A ZNF518A  
BCL11A ZNF524  
BCL11A ZNF652  
BCL11A ZNF780A  
BCL11A ZNF787  
BCL11A ZNF800  
BCL11A ZYX  
BHLHE40 ABHD17A  
BHLHE40 ABR  
BHLHE40 ACP5  
BHLHE40 ADGRE5  
BHLHE40 AFTPH  
BHLHE40 ALDH18A1  
BHLHE40 ALG8  
BHLHE40 ARF6  
BHLHE40 ARHGAP15  
BHLHE40 ARL8B  
BHLHE40 ASAH1  
BHLHE40 ATP6V0E1  
BHLHE40 ATP6V1F  
BHLHE40 BCAT1  
BHLHE40 BCL2  
BHLHE40 BHLHE40  
BHLHE40 BMI1  
BHLHE40 C12orf29  
BHLHE40 CD164  
BHLHE40 CD200  
BHLHE40 CD3EAP  
BHLHE40 CD68  
BHLHE40 CDK4  
BHLHE40 CDK7  
BHLHE40 CDK8  
BHLHE40 CELF2  
BHLHE40 CPOX  
BHLHE40 CRY1  
BHLHE40 CUL5  
BHLHE40 D2HGDH  
BHLHE40 DDIT4  
BHLHE40 DIAPH2  
BHLHE40 DLGAP4  
BHLHE40 DNPEP  
BHLHE40 DPH2



BHLHE40 EDC3  
BHLHE40 EHD3  
BHLHE40 EIF4EBP1  
BHLHE40 FAS  
BHLHE40 FBX015  
BHLHE40 FBXW4  
BHLHE40 FLNA  
BHLHE40 FTH1  
BHLHE40 GNPDA1  
BHLHE40 GNPTAB  
BHLHE40 GPM6B  
BHLHE40 GPR183  
BHLHE40 GPX4  
BHLHE40 HAUS6  
BHLHE40 HBP1  
BHLHE40 HIF1A  
BHLHE40 HIVEP1  
BHLHE40 HSF2  
BHLHE40 ID3  
BHLHE40 INO80  
BHLHE40 KIAA1551  
BHLHE40 KLF6  
BHLHE40 LITAF  
BHLHE40 LY9  
BHLHE40 M6PR  
BHLHE40 MAP2K7  
BHLHE40 MAP4  
BHLHE40 MARCH3  
BHLHE40 MBP  
BHLHE40 MFSD2A  
BHLHE40 MOSPD1  
BHLHE40 MREG  
BHLHE40 MSC  
BHLHE40 MTSS1  
BHLHE40 MYC  
BHLHE40 NABP1  
BHLHE40 NAGPA  
BHLHE40 NDUFAF5  
BHLHE40 NOL8  
BHLHE40 NPW  
BHLHE40 NUMB  
BHLHE40 ODF2L  
BHLHE40 ORMDL1  
BHLHE40 PARP6  
BHLHE40 PEPD  
BHLHE40 PET117  
BHLHE40 PFKFB3  
BHLHE40 PFKP  
BHLHE40 PHACTR1  
BHLHE40 PHYKPL

BHLHE40 PIM3  
BHLHE40 PLEK  
BHLHE40 PPAT  
BHLHE40 PRDM4  
BHLHE40 PSAT1  
BHLHE40 PTPN11  
BHLHE40 PTPN6  
BHLHE40 PUS7  
BHLHE40 QPCTL  
BHLHE40 RAB27A  
BHLHE40 RBM27  
BHLHE40 RCAN1  
BHLHE40 REL  
BHLHE40 RNF146  
BHLHE40 S100A6  
BHLHE40 SERPINF1  
BHLHE40 SLC20A2  
BHLHE40 SLC38A5  
BHLHE40 SMUG1  
BHLHE40 SNX9  
BHLHE40 SRFBP1  
BHLHE40 STAT5A  
BHLHE40 STIP1  
BHLHE40 SUN2  
BHLHE40 TBC1D9  
BHLHE40 TBPL1  
BHLHE40 TICAM1  
BHLHE40 TIMM23  
BHLHE40 TLK2  
BHLHE40 TMEM102  
BHLHE40 TMEM30A  
BHLHE40 TNFRSF14  
BHLHE40 TNRC6B  
BHLHE40 TOMM40L  
BHLHE40 TRAP1  
BHLHE40 TRIB2  
BHLHE40 TRMT10C  
BHLHE40 VAMP1  
BHLHE40 VPS13A  
BHLHE40 WDR43  
BHLHE40 XPOT  
BHLHE40 YBX1  
BHLHE40 YBX3  
BHLHE40 YWHAG  
BHLHE40 ZFP82  
BHLHE40 ZNF667-AS1  
BHLHE41 CTSA  
BRF2 APMAP  
BRF2 ARF1  
BRF2 ATP6V0A1

|      |          |
|------|----------|
| BRF2 | BCOR     |
| BRF2 | BIN3     |
| BRF2 | BRF2     |
| BRF2 | C1orf174 |
| BRF2 | CADM1    |
| BRF2 | CCND2    |
| BRF2 | CHD6     |
| BRF2 | CLK2     |
| BRF2 | CLTC     |
| BRF2 | CNPPD1   |
| BRF2 | CYB561   |
| BRF2 | DMAP1    |
| BRF2 | DUSP4    |
| BRF2 | ENO1     |
| BRF2 | EXT1     |
| BRF2 | FASTKD5  |
| BRF2 | FYN      |
| BRF2 | GATB     |
| BRF2 | HSP90AB1 |
| BRF2 | IFT46    |
| BRF2 | IL23A    |
| BRF2 | KIF9     |
| BRF2 | LITAF    |
| BRF2 | MAPRE2   |
| BRF2 | MCM8     |
| BRF2 | MCRS1    |
| BRF2 | NEK11    |
| BRF2 | NFYC     |
| BRF2 | NUP188   |
| BRF2 | PIKFYVE  |
| BRF2 | POLR3H   |
| BRF2 | PPID     |
| BRF2 | PRR3     |
| BRF2 | PSMD11   |
| BRF2 | PYROXD1  |
| BRF2 | RARA     |
| BRF2 | RASA3    |
| BRF2 | RBM47    |
| BRF2 | SERTAD2  |
| BRF2 | SLC12A4  |
| BRF2 | SLC46A3  |
| BRF2 | SOX4     |
| BRF2 | SQSTM1   |
| BRF2 | SSTR2    |
| BRF2 | STIL     |
| BRF2 | STK10    |
| BRF2 | TBCC     |
| BRF2 | TEFM     |
| BRF2 | TFB1M    |
| BRF2 | THAP2    |

|       |          |
|-------|----------|
| BRF2  | TM2D1    |
| BRF2  | TMBIM1   |
| BRF2  | TMUB2    |
| BRF2  | TNIP1    |
| BRF2  | TSPAN31  |
| BRF2  | VTI1A    |
| BRF2  | WDFY1    |
| BRF2  | XIAP     |
| BRF2  | ZDHHC7   |
| CEBPB | AAGAB    |
| CEBPB | AAMP     |
| CEBPB | AARS     |
| CEBPB | ABCD4    |
| CEBPB | ABCE1    |
| CEBPB | ACBD6    |
| CEBPB | ACIN1    |
| CEBPB | ACOX1    |
| CEBPB | ACOXL    |
| CEBPB | ACTR10   |
| CEBPB | ACTR1B   |
| CEBPB | ADK      |
| CEBPB | ADM2     |
| CEBPB | ADRM1    |
| CEBPB | ADSS     |
| CEBPB | AFF2     |
| CEBPB | AGA      |
| CEBPB | ALDH1L2  |
| CEBPB | ALG5     |
| CEBPB | ANAPC13  |
| CEBPB | ANAPC16  |
| CEBPB | ANGEL2   |
| CEBPB | ANKRD11  |
| CEBPB | ANKRD28  |
| CEBPB | ANKRD37  |
| CEBPB | ANP32B   |
| CEBPB | ANXA7    |
| CEBPB | API5     |
| CEBPB | APP      |
| CEBPB | APPL2    |
| CEBPB | ARCN1    |
| CEBPB | ARHGAP24 |
| CEBPB | ARL2     |
| CEBPB | ARL5B    |
| CEBPB | ARL8B    |
| CEBPB | ARPC5L   |
| CEBPB | ARV1     |
| CEBPB | ASNS     |
| CEBPB | ATF4     |
| CEBPB | ATF5     |
| CEBPB | ATF6     |

|       |          |
|-------|----------|
| CEBPB | ATL2     |
| CEBPB | ATP1B1   |
| CEBPB | ATP1B3   |
| CEBPB | ATP6V0E1 |
| CEBPB | ATP6V1E2 |
| CEBPB | ATRAID   |
| CEBPB | ATXN1    |
| CEBPB | ATXN2L   |
| CEBPB | AZIN1    |
| CEBPB | B4GALT3  |
| CEBPB | BATF3    |
| CEBPB | BCAS2    |
| CEBPB | BCL2     |
| CEBPB | BET1     |
| CEBPB | BEX2     |
| CEBPB | BEX5     |
| CEBPB | BFAR     |
| CEBPB | BIN2     |
| CEBPB | BLVRB    |
| CEBPB | BMI1     |
| CEBPB | BMT2     |
| CEBPB | BOD1     |
| CEBPB | BSDC1    |
| CEBPB | BTBD7    |
| CEBPB | BTF3L4   |
| CEBPB | BUD31    |
| CEBPB | C11orf1  |
| CEBPB | C12orf29 |
| CEBPB | C15orf61 |
| CEBPB | C19orf70 |
| CEBPB | C1orf52  |
| CEBPB | C1QBP    |
| CEBPB | C20orf27 |
| CEBPB | C6orf48  |
| CEBPB | CALCOC02 |
| CEBPB | CALU     |
| CEBPB | CARS     |
| CEBPB | CAST     |
| CEBPB | CAV1     |
| CEBPB | CBX6     |
| CEBPB | CCDC144A |
| CEBPB | CCDC59   |
| CEBPB | CCDC7    |
| CEBPB | CCDC86   |
| CEBPB | CCND2    |
| CEBPB | CCNK     |
| CEBPB | CCPG1    |
| CEBPB | CCR7     |
| CEBPB | CCZ1B    |
| CEBPB | CD63     |

|       |          |
|-------|----------|
| CEBPB | CDC37L1  |
| CEBPB | CDK4     |
| CEBPB | CDKN1A   |
| CEBPB | CEBPB    |
| CEBPB | CEBPG    |
| CEBPB | CEP131   |
| CEBPB | CEP162   |
| CEBPB | CEP170   |
| CEBPB | CEP70    |
| CEBPB | CFAP97   |
| CEBPB | CFL2     |
| CEBPB | CHAC1    |
| CEBPB | CHERP    |
| CEBPB | CHMP4B   |
| CEBPB | CHP1     |
| CEBPB | CHPF2    |
| CEBPB | CINP     |
| CEBPB | CIRBP    |
| CEBPB | CISD2    |
| CEBPB | CLIP1    |
| CEBPB | CLIP4    |
| CEBPB | CLK2     |
| CEBPB | CLPB     |
| CEBPB | CMSS1    |
| CEBPB | CNN3     |
| CEBPB | CNOT11   |
| CEBPB | COA4     |
| CEBPB | COLGALT1 |
| CEBPB | COMMD3   |
| CEBPB | COPB1    |
| CEBPB | COPG1    |
| CEBPB | COPS2    |
| CEBPB | COX20    |
| CEBPB | CPSF4    |
| CEBPB | CREB5    |
| CEBPB | CRY1     |
| CEBPB | CSNK2A1  |
| CEBPB | CSRP1    |
| CEBPB | CTH      |
| CEBPB | CTNNBIP1 |
| CEBPB | CTR9     |
| CEBPB | CTSB     |
| CEBPB | CYB5R1   |
| CEBPB | CYCS     |
| CEBPB | CYLD     |
| CEBPB | CYTH1    |
| CEBPB | DARS     |
| CEBPB | DDIT3    |
| CEBPB | DDIT4    |
| CEBPB | DDX18    |

|       |              |
|-------|--------------|
| CEBPB | DDX19A       |
| CEBPB | DDX21        |
| CEBPB | DDX39B       |
| CEBPB | DDX55        |
| CEBPB | DEDD2        |
| CEBPB | DERL3        |
| CEBPB | DESI1        |
| CEBPB | DHRS9        |
| CEBPB | DNAJC1       |
| CEBPB | DNAJC10      |
| CEBPB | DNAJC2       |
| CEBPB | DNPEP        |
| CEBPB | DONSON       |
| CEBPB | DPH2         |
| CEBPB | DPM2         |
| CEBPB | DRAM1        |
| CEBPB | DTD2         |
| CEBPB | DTNB         |
| CEBPB | DUSP10       |
| CEBPB | DUSP5        |
| CEBPB | DYNLT3       |
| CEBPB | E2F1         |
| CEBPB | EAPP         |
| CEBPB | EDEM1        |
| CEBPB | EEA1         |
| CEBPB | EEF1A1       |
| CEBPB | EEF1B2       |
| CEBPB | EEF1D        |
| CEBPB | EEF1E1       |
| CEBPB | EFCAB2       |
| CEBPB | EIF1         |
| CEBPB | EIF2A        |
| CEBPB | EIF2S2       |
| CEBPB | EIF3J        |
| CEBPB | EIF4A1       |
| CEBPB | EIF4A2       |
| CEBPB | EIF4EBP1     |
| CEBPB | EIF6         |
| CEBPB | ELAC1        |
| CEBPB | ELL2         |
| CEBPB | EMC2         |
| CEBPB | EMC4         |
| CEBPB | EMC7         |
| CEBPB | EMD          |
| CEBPB | EMG1         |
| CEBPB | EMP3         |
| CEBPB | EN01         |
| CEBPB | EPB41L2      |
| CEBPB | EPB41L4A-AS1 |
| CEBPB | EPRS         |

|       |           |
|-------|-----------|
| CEBPB | ERGIC2    |
| CEBPB | ERLEC1    |
| CEBPB | ESF1      |
| CEBPB | EVA1B     |
| CEBPB | FAM107B   |
| CEBPB | FAM204A   |
| CEBPB | FAM234A   |
| CEBPB | FBL       |
| CEBPB | FBX04     |
| CEBPB | FCER2     |
| CEBPB | FDXACB1   |
| CEBPB | FGR       |
| CEBPB | FKBP11    |
| CEBPB | FKBPL     |
| CEBPB | FOXP1     |
| CEBPB | FPGS      |
| CEBPB | FTH1      |
| CEBPB | FTX       |
| CEBPB | FUBP1     |
| CEBPB | FUBP3     |
| CEBPB | FUCA1     |
| CEBPB | FXN       |
| CEBPB | FYN       |
| CEBPB | G6PD      |
| CEBPB | GADD45A   |
| CEBPB | GALNT2    |
| CEBPB | GANAB     |
| CEBPB | GAR1      |
| CEBPB | GARS      |
| CEBPB | GEMIN5    |
| CEBPB | GHITM     |
| CEBPB | GMPPB     |
| CEBPB | GNPNAT1   |
| CEBPB | GNS       |
| CEBPB | GOLGA7    |
| CEBPB | GOT1      |
| CEBPB | GPATCH4   |
| CEBPB | GPN3      |
| CEBPB | GPR65     |
| CEBPB | GPT2      |
| CEBPB | HAX1      |
| CEBPB | HERC2     |
| CEBPB | HERPUD1   |
| CEBPB | HIST1H2BJ |
| CEBPB | HIST3H2A  |
| CEBPB | H00K2     |
| CEBPB | HSP90AB1  |
| CEBPB | HSPA5     |
| CEBPB | HSPA8     |
| CEBPB | HSPA9     |



|       |           |
|-------|-----------|
| CEBPB | HUWE1     |
| CEBPB | HYOU1     |
| CEBPB | IARS      |
| CEBPB | ICE1      |
| CEBPB | ID2       |
| CEBPB | IDH3A     |
| CEBPB | IFRD1     |
| CEBPB | IMPDH2    |
| CEBPB | INTS7     |
| CEBPB | IP6K1     |
| CEBPB | IRF1      |
| CEBPB | IRF2      |
| CEBPB | IRF4      |
| CEBPB | ITCH      |
| CEBPB | JMJD1C    |
| CEBPB | JMY       |
| CEBPB | JUN       |
| CEBPB | KDM3A     |
| CEBPB | KDM8      |
| CEBPB | KIAA0232  |
| CEBPB | KIFAP3    |
| CEBPB | KLF7      |
| CEBPB | KLHL28    |
| CEBPB | KMT2E-AS1 |
| CEBPB | KRTCAP2   |
| CEBPB | LAMP1     |
| CEBPB | LAPTM4A   |
| CEBPB | LARP1B    |
| CEBPB | LARS      |
| CEBPB | LEF1      |
| CEBPB | LETMD1    |
| CEBPB | LINC00158 |
| CEBPB | LMAN2     |
| CEBPB | LMBRD1    |
| CEBPB | LMF1      |
| CEBPB | LMF2      |
| CEBPB | LMO4      |
| CEBPB | LONP1     |
| CEBPB | LRRFIP2   |
| CEBPB | LY96      |
| CEBPB | LYSMD3    |
| CEBPB | MACROD2   |
| CEBPB | MAGOH     |
| CEBPB | MAG0HB    |
| CEBPB | MAML2     |
| CEBPB | MAN1B1    |
| CEBPB | MANEA     |
| CEBPB | MANF      |
| CEBPB | MAP4K5    |
| CEBPB | MARCKS    |

|       |          |
|-------|----------|
| CEBPB | MARS     |
| CEBPB | MCUR1    |
| CEBPB | MDN1     |
| CEBPB | MED15    |
| CEBPB | MED8     |
| CEBPB | MEI1     |
| CEBPB | MFSD14A  |
| CEBPB | MFSD14C  |
| CEBPB | MGAT4B   |
| CEBPB | MIA3     |
| CEBPB | MID1IP1  |
| CEBPB | MIR155HG |
| CEBPB | MIR22HG  |
| CEBPB | MLH3     |
| CEBPB | MPZL1    |
| CEBPB | MRPL1    |
| CEBPB | MRPL3    |
| CEBPB | MRPL40   |
| CEBPB | MRPL53   |
| CEBPB | MRPS22   |
| CEBPB | MSL3     |
| CEBPB | MST01    |
| CEBPB | MTHFD2   |
| CEBPB | MXI1     |
| CEBPB | MYC      |
| CEBPB | N4BP1    |
| CEBPB | N4BP2L2  |
| CEBPB | NAA20    |
| CEBPB | NAGLU    |
| CEBPB | NAMPT    |
| CEBPB | NARS     |
| CEBPB | NCALD    |
| CEBPB | NCAPG2   |
| CEBPB | NCOA2    |
| CEBPB | NCSTN    |
| CEBPB | NDFIP1   |
| CEBPB | NDUFB7   |
| CEBPB | NECAP1   |
| CEBPB | NFE2L1   |
| CEBPB | NFE2L2   |
| CEBPB | NFKB1    |
| CEBPB | NFKBIA   |
| CEBPB | NFKBIB   |
| CEBPB | NGDN     |
| CEBPB | NIP7     |
| CEBPB | NLK      |
| CEBPB | NOC3L    |
| CEBPB | NOLC1    |
| CEBPB | NORAD    |
| CEBPB | NPAT     |

|       |         |
|-------|---------|
| CEBPB | NPM1    |
| CEBPB | NPM3    |
| CEBPB | NPW     |
| CEBPB | NR1H2   |
| CEBPB | NR2C2AP |
| CEBPB | NRP2    |
| CEBPB | NSF     |
| CEBPB | NUBP2   |
| CEBPB | NUCB2   |
| CEBPB | NUDT8   |
| CEBPB | NXPH4   |
| CEBPB | NXT1    |
| CEBPB | OCIAD1  |
| CEBPB | ODC1    |
| CEBPB | ODF3B   |
| CEBPB | ORA0V1  |
| CEBPB | OST4    |
| CEBPB | OXR1    |
| CEBPB | PABPC4  |
| CEBPB | PAK1    |
| CEBPB | PAK1IP1 |
| CEBPB | PARG    |
| CEBPB | PARP14  |
| CEBPB | PARP8   |
| CEBPB | PARVB   |
| CEBPB | PARVG   |
| CEBPB | PAXB1   |
| CEBPB | PBLD    |
| CEBPB | PCK2    |
| CEBPB | PCNP    |
| CEBPB | PDAP1   |
| CEBPB | PDCD11  |
| CEBPB | PDCD4   |
| CEBPB | PDE4A   |
| CEBPB | PDE4B   |
| CEBPB | PDE8A   |
| CEBPB | PEMT    |
| CEBPB | PEX12   |
| CEBPB | PFDN2   |
| CEBPB | PFN2    |
| CEBPB | PHACTR1 |
| CEBPB | PHF1    |
| CEBPB | PHGDH   |
| CEBPB | PHYKPL  |
| CEBPB | PICK1   |
| CEBPB | PIGB    |
| CEBPB | PIG0    |
| CEBPB | PIM3    |
| CEBPB | PIP4K2B |
| CEBPB | PIP5K1B |

|       |          |
|-------|----------|
| CEBPB | PITHD1   |
| CEBPB | PKIG     |
| CEBPB | PLRG1    |
| CEBPB | PMAIP1   |
| CEBPB | PMM2     |
| CEBPB | PNPLA8   |
| CEBPB | POGLUT1  |
| CEBPB | POLQ     |
| CEBPB | POLRMT   |
| CEBPB | PPIP5K2  |
| CEBPB | PPP1R11  |
| CEBPB | PPP1R15A |
| CEBPB | PPP1R15B |
| CEBPB | PPP3CC   |
| CEBPB | PQLC1    |
| CEBPB | PRNP     |
| CEBPB | PRPF19   |
| CEBPB | PRR14L   |
| CEBPB | PRRC1    |
| CEBPB | PRRC2C   |
| CEBPB | PSAP     |
| CEBPB | PSAT1    |
| CEBPB | PSENE1   |
| CEBPB | PSMC4    |
| CEBPB | PSMC5    |
| CEBPB | PSMC6    |
| CEBPB | PSMD11   |
| CEBPB | PSMF1    |
| CEBPB | PUM3     |
| CEBPB | PYCR1    |
| CEBPB | PYCR2    |
| CEBPB | QS0X1    |
| CEBPB | RAB10    |
| CEBPB | RAD23A   |
| CEBPB | RAD51D   |
| CEBPB | RALGAPB  |
| CEBPB | RANBP1   |
| CEBPB | RASA2    |
| CEBPB | RBM28    |
| CEBPB | RBM34    |
| CEBPB | RBM39    |
| CEBPB | RCN1     |
| CEBPB | RER1     |
| CEBPB | REV3L    |
| CEBPB | RIC1     |
| CEBPB | RIOK1    |
| CEBPB | RIPK1    |
| CEBPB | RMDN3    |
| CEBPB | RNASEH1  |
| CEBPB | RNF113A  |

|       |          |
|-------|----------|
| CEBPB | RNF139   |
| CEBPB | RNF145   |
| CEBPB | RNF149   |
| CEBPB | RNF157   |
| CEBPB | RNF170   |
| CEBPB | RNF181   |
| CEBPB | RNF187   |
| CEBPB | RNF216   |
| CEBPB | RNF220   |
| CEBPB | RNF41    |
| CEBPB | RNMT     |
| CEBPB | RPF2     |
| CEBPB | RPL12    |
| CEBPB | RPL13    |
| CEBPB | RPL13A   |
| CEBPB | RPL18    |
| CEBPB | RPL18A   |
| CEBPB | RPL21    |
| CEBPB | RPL32    |
| CEBPB | RPL34    |
| CEBPB | RPL36    |
| CEBPB | RPL5     |
| CEBPB | RPL7     |
| CEBPB | RPL9     |
| CEBPB | RPLP0    |
| CEBPB | RPLP1    |
| CEBPB | RPS10    |
| CEBPB | RPS12    |
| CEBPB | RPS17    |
| CEBPB | RPS19    |
| CEBPB | RPS19BP1 |
| CEBPB | RPS20    |
| CEBPB | RPS21    |
| CEBPB | RPS27    |
| CEBPB | RPS29    |
| CEBPB | RPS3A    |
| CEBPB | RPS6     |
| CEBPB | RPS6KB1  |
| CEBPB | RRP15    |
| CEBPB | RSL1D1   |
| CEBPB | RSL24D1  |
| CEBPB | SACM1L   |
| CEBPB | SARAF    |
| CEBPB | SARS     |
| CEBPB | SBDS     |
| CEBPB | SEC23B   |
| CEBPB | SEC24D   |
| CEBPB | SEC63    |
| CEBPB | SEL1L    |
| CEBPB | SESN2    |

|       |          |
|-------|----------|
| CEBPB | SFSWAP   |
| CEBPB | SGF29    |
| CEBPB | SGK1     |
| CEBPB | SHARPIN  |
| CEBPB | SHMT2    |
| CEBPB | SIGIRR   |
| CEBPB | SIL1     |
| CEBPB | SLC10A7  |
| CEBPB | SLC16A1  |
| CEBPB | SLC16A3  |
| CEBPB | SLC1A4   |
| CEBPB | SLC1A5   |
| CEBPB | SLC25A39 |
| CEBPB | SLC35B1  |
| CEBPB | SLC38A2  |
| CEBPB | SLC39A1  |
| CEBPB | SLC3A2   |
| CEBPB | SLC44A1  |
| CEBPB | SLC52A2  |
| CEBPB | SLC6A9   |
| CEBPB | SLC7A1   |
| CEBPB | SLC7A5   |
| CEBPB | SLC7A7   |
| CEBPB | SNAP29   |
| CEBPB | SNHG15   |
| CEBPB | SNHG8    |
| CEBPB | SNTB1    |
| CEBPB | S0CS3    |
| CEBPB | SPATC1L  |
| CEBPB | SPATS2   |
| CEBPB | SPEN     |
| CEBPB | SPRY1    |
| CEBPB | SQSTM1   |
| CEBPB | SRFBP1   |
| CEBPB | SRP54    |
| CEBPB | SRSF3    |
| CEBPB | SSBP1    |
| CEBPB | SSR4     |
| CEBPB | SSRP1    |
| CEBPB | STAT3    |
| CEBPB | STAT6    |
| CEBPB | STK4     |
| CEBPB | STOM     |
| CEBPB | STOML2   |
| CEBPB | STT3A    |
| CEBPB | STX11    |
| CEBPB | STX3     |
| CEBPB | STXBP3   |
| CEBPB | SUC0     |
| CEBPB | SYNRG    |

|       |           |
|-------|-----------|
| CEBPB | SYTL1     |
| CEBPB | SYVN1     |
| CEBPB | TAGAP     |
| CEBPB | TARS      |
| CEBPB | TCEA1     |
| CEBPB | TCTN3     |
| CEBPB | TECPR2    |
| CEBPB | TES       |
| CEBPB | TFAM      |
| CEBPB | TFG       |
| CEBPB | THAP1     |
| CEBPB | THAP7     |
| CEBPB | THAP9-AS1 |
| CEBPB | THTPA     |
| CEBPB | TIMM10    |
| CEBPB | TIMM21    |
| CEBPB | TIMM44    |
| CEBPB | TIMM8A    |
| CEBPB | TLCD1     |
| CEBPB | TLE3      |
| CEBPB | TMBIM4    |
| CEBPB | TMBIM6    |
| CEBPB | TMED2     |
| CEBPB | TMED4     |
| CEBPB | TMEM109   |
| CEBPB | TMEM147   |
| CEBPB | TMEM154   |
| CEBPB | TMEM156   |
| CEBPB | TMEM167B  |
| CEBPB | TMEM216   |
| CEBPB | TMEM267   |
| CEBPB | TMEM41B   |
| CEBPB | TMEM50B   |
| CEBPB | TMEM52B   |
| CEBPB | TMEM9B    |
| CEBPB | TNFAIP3   |
| CEBPB | TNFAIP8   |
| CEBPB | TNFRSF9   |
| CEBPB | TNIP2     |
| CEBPB | TOMM40    |
| CEBPB | TP53I13   |
| CEBPB | TPD52L2   |
| CEBPB | TPRKB     |
| CEBPB | TRADD     |
| CEBPB | TRAF3IP2  |
| CEBPB | TRAM1     |
| CEBPB | TREML2    |
| CEBPB | TRIB3     |
| CEBPB | TRIM33    |
| CEBPB | TRIM44    |

|       |         |
|-------|---------|
| CEBPB | TRMT1   |
| CEBPB | TRNT1   |
| CEBPB | TSC22D3 |
| CEBPB | TSEN15  |
| CEBPB | TSPYL2  |
| CEBPB | TSTA3   |
| CEBPB | TTC19   |
| CEBPB | TTC27   |
| CEBPB | TUFM    |
| CEBPB | TUSC1   |
| CEBPB | TXLNB   |
| CEBPB | TXLNG   |
| CEBPB | TXN     |
| CEBPB | TXNL1   |
| CEBPB | UAP1    |
| CEBPB | UBA5    |
| CEBPB | UBE2B   |
| CEBPB | UBXN1   |
| CEBPB | UCHL5   |
| CEBPB | UGT2B17 |
| CEBPB | UMAD1   |
| CEBPB | URM1    |
| CEBPB | URO5    |
| CEBPB | USP14   |
| CEBPB | USP16   |
| CEBPB | USP36   |
| CEBPB | USPL1   |
| CEBPB | VAMP2   |
| CEBPB | VAV1    |
| CEBPB | VIM     |
| CEBPB | VPS35   |
| CEBPB | VPS37B  |
| CEBPB | WARS    |
| CEBPB | WBP11   |
| CEBPB | WDR45   |
| CEBPB | WDR74   |
| CEBPB | WDR75   |
| CEBPB | WDR830S |
| CEBPB | WDR89   |
| CEBPB | WWOX    |
| CEBPB | XBP1    |
| CEBPB | XP06    |
| CEBPB | XP0T    |
| CEBPB | XRCC5   |
| CEBPB | YARS    |
| CEBPB | YBX1    |
| CEBPB | YBX3    |
| CEBPB | YIF1A   |
| CEBPB | YIPF2   |
| CEBPB | YPEL5   |



|       |          |
|-------|----------|
| CEBPB | YWHAG    |
| CEBPB | ZC3HC1   |
| CEBPB | ZEB1     |
| CEBPB | ZFAND2A  |
| CEBPB | ZFAND2B  |
| CEBPB | ZFAS1    |
| CEBPB | ZFP36L1  |
| CEBPB | ZFP36L2  |
| CEBPB | ZMAT2    |
| CEBPB | ZNF131   |
| CEBPB | ZNF134   |
| CEBPB | ZNF146   |
| CEBPB | ZNF22    |
| CEBPB | ZNF232   |
| CEBPB | ZNF331   |
| CEBPB | ZNF48    |
| CEBPB | ZNF507   |
| CEBPB | ZNF518B  |
| CEBPB | ZNF667   |
| CEBPB | ZNF75A   |
| CEBPB | ZNF787   |
| CEBPB | ZPR1     |
| CEBPD | NFKBIZ   |
| CEBPG | AASDHPPT |
| CEBPG | ABCE1    |
| CEBPG | ABHD11   |
| CEBPG | ACSL1    |
| CEBPG | ANKRD11  |
| CEBPG | AP3M2    |
| CEBPG | ARID3A   |
| CEBPG | ARL17A   |
| CEBPG | ASNS     |
| CEBPG | ATAD2    |
| CEBPG | ATF3     |
| CEBPG | ATF4     |
| CEBPG | ATF5     |
| CEBPG | BCAS2    |
| CEBPG | BCAT1    |
| CEBPG | C12orf75 |
| CEBPG | CCND2    |
| CEBPG | CCPG1    |
| CEBPG | CEBPB    |
| CEBPG | CEBPG    |
| CEBPG | CREM     |
| CEBPG | CWC15    |
| CEBPG | CYCS     |
| CEBPG | DDIT4    |
| CEBPG | DPH3     |
| CEBPG | DYRK1A   |
| CEBPG | EIF1     |

|       |          |
|-------|----------|
| CEBPG | EIF2S2   |
| CEBPG | EIF4EBP1 |
| CEBPG | EPRS     |
| CEBPG | FAM107B  |
| CEBPG | FBX025   |
| CEBPG | FTH1     |
| CEBPG | GARS     |
| CEBPG | GHITM    |
| CEBPG | GNL1     |
| CEBPG | GOT1     |
| CEBPG | GPT2     |
| CEBPG | HAX1     |
| CEBPG | HNRNPA0  |
| CEBPG | HSPA9    |
| CEBPG | IARS     |
| CEBPG | IFI44L   |
| CEBPG | IKZF3    |
| CEBPG | IRF2BP2  |
| CEBPG | JMY      |
| CEBPG | JUND     |
| CEBPG | KCNA3    |
| CEBPG | KDM6B    |
| CEBPG | KLC2     |
| CEBPG | LOXL2    |
| CEBPG | MAFG     |
| CEBPG | METTL1   |
| CEBPG | MIEF1    |
| CEBPG | MST01    |
| CEBPG | MTHFD2   |
| CEBPG | N6AMT1   |
| CEBPG | NAA60    |
| CEBPG | NAMPT    |
| CEBPG | NARS     |
| CEBPG | NFE2L2   |
| CEBPG | NFKB1    |
| CEBPG | NFKBIA   |
| CEBPG | NSUN4    |
| CEBPG | NUP35    |
| CEBPG | NUP98    |
| CEBPG | PDAP1    |
| CEBPG | PDGFA    |
| CEBPG | PHF19    |
| CEBPG | PICALM   |
| CEBPG | PLRG1    |
| CEBPG | PMAIP1   |
| CEBPG | PPID     |
| CEBPG | PPT1     |
| CEBPG | PRNP     |
| CEBPG | PSAT1    |
| CEBPG | PSMD14   |

|       |          |
|-------|----------|
| CEBPG | PTGIR    |
| CEBPG | PTP4A1   |
| CEBPG | PYCR1    |
| CEBPG | RAB40C   |
| CEBPG | RAD23A   |
| CEBPG | RCN1     |
| CEBPG | RHEB     |
| CEBPG | RHOF     |
| CEBPG | RPF1     |
| CEBPG | RSL24D1  |
| CEBPG | SARS     |
| CEBPG | SEPT11   |
| CEBPG | SESN2    |
| CEBPG | SESTD1   |
| CEBPG | SHMT2    |
| CEBPG | SLC1A5   |
| CEBPG | SLC3A2   |
| CEBPG | SLC6A9   |
| CEBPG | SLC7A11  |
| CEBPG | SNHG15   |
| CEBPG | SNX12    |
| CEBPG | SPIN1    |
| CEBPG | SRSF7    |
| CEBPG | SSX2IP   |
| CEBPG | STARD3NL |
| CEBPG | STX4     |
| CEBPG | SUM01    |
| CEBPG | SYTL1    |
| CEBPG | TARS     |
| CEBPG | TBCCD1   |
| CEBPG | TCEA1    |
| CEBPG | TIMM44   |
| CEBPG | TMEM267  |
| CEBPG | TNFAIP3  |
| CEBPG | TRIB3    |
| CEBPG | TSEN15   |
| CEBPG | UBE2B    |
| CEBPG | USP3     |
| CEBPG | USP36    |
| CEBPG | VEGFA    |
| CEBPG | VPS37B   |
| CEBPG | WARS     |
| CEBPG | XPOT     |
| CEBPG | YARS     |
| CEBPG | ZDHC20   |
| CEBPG | ZNF143   |
| CEBPG | ZNF706   |
| CLOCK | ALDOC    |
| CLOCK | BUB1B    |
| CLOCK | EIF4EBP1 |

|       |           |
|-------|-----------|
| CLOCK | EPB41     |
| CLOCK | ESR2      |
| CLOCK | IQSEC1    |
| CLOCK | KAT5      |
| CLOCK | KAT8      |
| CLOCK | MIR22HG   |
| CLOCK | NABP1     |
| CLOCK | QRICH1    |
| CLOCK | RBM15B    |
| CLOCK | SNAPC1    |
| CLOCK | TMEM214   |
| CLOCK | TRPM7     |
| CLOCK | USP28     |
| CLOCK | ZNF532    |
| CREB1 | ABI1      |
| CREB1 | ACTR2     |
| CREB1 | ADAM17    |
| CREB1 | ADO       |
| CREB1 | ANKHD1    |
| CREB1 | ANKRD11   |
| CREB1 | AP1M1     |
| CREB1 | ASB8      |
| CREB1 | ATM       |
| CREB1 | BASP1     |
| CREB1 | BAZ2A     |
| CREB1 | BBS4      |
| CREB1 | BBX       |
| CREB1 | C2orf49   |
| CREB1 | CBLL1     |
| CREB1 | CCNI      |
| CREB1 | CDK7      |
| CREB1 | CENPF     |
| CREB1 | CEP85L    |
| CREB1 | CLTC      |
| CREB1 | CYB561A3  |
| CREB1 | DDX3X     |
| CREB1 | DLEU2     |
| CREB1 | ELK4      |
| CREB1 | EXOC3     |
| CREB1 | FADS2     |
| CREB1 | FAM110A   |
| CREB1 | FAM200A   |
| CREB1 | FBR5      |
| CREB1 | FBXW4     |
| CREB1 | G2E3      |
| CREB1 | GABARAPL2 |
| CREB1 | GAR1      |
| CREB1 | GNAI3     |
| CREB1 | GPATCH2L  |
| CREB1 | GSKIP     |

|       |           |
|-------|-----------|
| CREB1 | HMBS      |
| CREB1 | IKZF1     |
| CREB1 | KBTBD4    |
| CREB1 | KDM2A     |
| CREB1 | KLF9      |
| CREB1 | KLHL28    |
| CREB1 | LATS2     |
| CREB1 | LONP1     |
| CREB1 | MAGED2    |
| CREB1 | MIDN      |
| CREB1 | MTPN      |
| CREB1 | MYO19     |
| CREB1 | NCOA2     |
| CREB1 | NEDD4L    |
| CREB1 | NFATC1    |
| CREB1 | NFKB2     |
| CREB1 | NIF3L1    |
| CREB1 | NORAD     |
| CREB1 | PATL1     |
| CREB1 | PDZD11    |
| CREB1 | PER2      |
| CREB1 | PHIP      |
| CREB1 | PHRF1     |
| CREB1 | PNISR     |
| CREB1 | PRKAG2    |
| CREB1 | PRR5      |
| CREB1 | PSMA6     |
| CREB1 | PTK2B     |
| CREB1 | PTPN12    |
| CREB1 | QRICH1    |
| CREB1 | RAB11A    |
| CREB1 | RCSD1     |
| CREB1 | ROCK1     |
| CREB1 | SHISA8    |
| CREB1 | SIN3A     |
| CREB1 | SIPA1     |
| CREB1 | SKIL      |
| CREB1 | SLC23A2   |
| CREB1 | SNX16     |
| CREB1 | SPDL1     |
| CREB1 | SPTLC2    |
| CREB1 | SRSF5     |
| CREB1 | STAT6     |
| CREB1 | SYAP1     |
| CREB1 | TAF12     |
| CREB1 | TANK      |
| CREB1 | TBP       |
| CREB1 | TECPR2    |
| CREB1 | TLN1      |
| CREB1 | TNFAIP8L2 |

|       |         |
|-------|---------|
| CREB1 | TNRC6A  |
| CREB1 | TP53BP1 |
| CREB1 | TRAF5   |
| CREB1 | TUBGCP6 |
| CREB1 | VANGL1  |
| CREB1 | VEZF1   |
| CREB1 | VPS4B   |
| CREB1 | VPS51   |
| CREB1 | WDR830S |
| CREB1 | ZBTB20  |
| CREB1 | ZCWPW1  |
| CREB1 | ZDHHC7  |
| CREB1 | ZNF397  |
| CREB1 | ZNF655  |
| CREB1 | ZNF75A  |
| CREB1 | ZSCAN5A |
| CREB3 | AAK1    |
| CREB3 | AAMP    |
| CREB3 | AARS    |
| CREB3 | ABCB8   |
| CREB3 | ACADVL  |
| CREB3 | ACBD3   |
| CREB3 | AC02    |
| CREB3 | AC0T13  |
| CREB3 | AC0T9   |
| CREB3 | AC0X1   |
| CREB3 | ACSL1   |
| CREB3 | ACSS1   |
| CREB3 | ADAM10  |
| CREB3 | ADD1    |
| CREB3 | ADI1    |
| CREB3 | ADIPOR1 |
| CREB3 | ADK     |
| CREB3 | ADM     |
| CREB3 | ADRM1   |
| CREB3 | AEBP1   |
| CREB3 | AGPAT1  |
| CREB3 | AIFM2   |
| CREB3 | AKAP9   |
| CREB3 | AKIRIN2 |
| CREB3 | AKR1A1  |
| CREB3 | AKT1S1  |
| CREB3 | ALDH1L2 |
| CREB3 | ALG1    |
| CREB3 | ALG12   |
| CREB3 | ALG14   |
| CREB3 | ALG2    |
| CREB3 | ALG3    |
| CREB3 | ALKBH3  |
| CREB3 | ANAPC13 |

|       |          |
|-------|----------|
| CREB3 | ANAPC16  |
| CREB3 | ANAPC2   |
| CREB3 | ANAPC5   |
| CREB3 | ANG      |
| CREB3 | ANKHD1   |
| CREB3 | ANKMY2   |
| CREB3 | ANKRD12  |
| CREB3 | ANKRD16  |
| CREB3 | ANKRD28  |
| CREB3 | ANKRD36  |
| CREB3 | ANKRD36C |
| CREB3 | ANKRD37  |
| CREB3 | ANKRD42  |
| CREB3 | ANXA2    |
| CREB3 | ANXA5    |
| CREB3 | ANXA6    |
| CREB3 | AP2A2    |
| CREB3 | AP2B1    |
| CREB3 | AP2M1    |
| CREB3 | AP2S1    |
| CREB3 | AP3B1    |
| CREB3 | AP3D1    |
| CREB3 | AP3S1    |
| CREB3 | AP5B1    |
| CREB3 | APMAP    |
| CREB3 | APOD     |
| CREB3 | APOL3    |
| CREB3 | APTX     |
| CREB3 | ARCN1    |
| CREB3 | ARF1     |
| CREB3 | ARF3     |
| CREB3 | ARF4     |
| CREB3 | ARFGAP1  |
| CREB3 | ARFGAP3  |
| CREB3 | ARFIP2   |
| CREB3 | ARHGDI1A |
| CREB3 | ARID3A   |
| CREB3 | ARL1     |
| CREB3 | ARL2BP   |
| CREB3 | ARL4A    |
| CREB3 | ARMC10   |
| CREB3 | ARMCX3   |
| CREB3 | ARMCX5   |
| CREB3 | ARRDC3   |
| CREB3 | ARSA     |
| CREB3 | ARSG     |
| CREB3 | ASAH1    |
| CREB3 | ASCC3    |
| CREB3 | ASNA1    |
| CREB3 | ASPHD2   |

|       |          |
|-------|----------|
| CREB3 | ATF4     |
| CREB3 | ATF6     |
| CREB3 | ATF6B    |
| CREB3 | ATG101   |
| CREB3 | ATG13    |
| CREB3 | ATOX1    |
| CREB3 | ATP13A1  |
| CREB3 | ATP2C1   |
| CREB3 | ATP6AP1  |
| CREB3 | ATP6AP2  |
| CREB3 | ATP6V0A1 |
| CREB3 | ATP6V0B  |
| CREB3 | ATP6V0D1 |
| CREB3 | ATP6V0E1 |
| CREB3 | ATP6V1A  |
| CREB3 | ATP6V1E1 |
| CREB3 | ATP6V1G1 |
| CREB3 | ATRAID   |
| CREB3 | ATXN1L   |
| CREB3 | ATXN2L   |
| CREB3 | AURKAIP1 |
| CREB3 | B3GAT3   |
| CREB3 | B3GNT9   |
| CREB3 | B4GALT2  |
| CREB3 | B4GALT3  |
| CREB3 | B9D1     |
| CREB3 | BABAM1   |
| CREB3 | BAZ2B    |
| CREB3 | BBX      |
| CREB3 | BCAP31   |
| CREB3 | BCAS2    |
| CREB3 | BCKDK    |
| CREB3 | BCLAF1   |
| CREB3 | BET1     |
| CREB3 | BET1L    |
| CREB3 | BEX4     |
| CREB3 | BEX5     |
| CREB3 | BHLHE41  |
| CREB3 | BIRC2    |
| CREB3 | BLCAP    |
| CREB3 | BLNK     |
| CREB3 | BLVRB    |
| CREB3 | BMS1     |
| CREB3 | BOLA2B   |
| CREB3 | BORCS6   |
| CREB3 | BRD2     |
| CREB3 | BRF2     |
| CREB3 | BRK1     |
| CREB3 | BSDC1    |
| CREB3 | BSG      |



|       |           |
|-------|-----------|
| CREB3 | BTG2      |
| CREB3 | BTK       |
| CREB3 | BUD31     |
| CREB3 | C11orf1   |
| CREB3 | C11orf68  |
| CREB3 | C16orf58  |
| CREB3 | C16orf91  |
| CREB3 | C17orf107 |
| CREB3 | C18orf32  |
| CREB3 | C19orf53  |
| CREB3 | C19orf70  |
| CREB3 | C1GALT1C1 |
| CREB3 | C1orf216  |
| CREB3 | C1orf43   |
| CREB3 | C21orf2   |
| CREB3 | C2orf74   |
| CREB3 | C4orf48   |
| CREB3 | C5orf15   |
| CREB3 | C6orf226  |
| CREB3 | C6orf62   |
| CREB3 | C8orf59   |
| CREB3 | C9orf16   |
| CREB3 | CACUL1    |
| CREB3 | CALCOC01  |
| CREB3 | CALCOC02  |
| CREB3 | CALM1     |
| CREB3 | CALR      |
| CREB3 | CALU      |
| CREB3 | CAMK1     |
| CREB3 | CAMK2B    |
| CREB3 | CAMTA2    |
| CREB3 | CANX      |
| CREB3 | CAP1      |
| CREB3 | CAPN10    |
| CREB3 | CAPRIN1   |
| CREB3 | CASP3     |
| CREB3 | CASP8     |
| CREB3 | CBR1      |
| CREB3 | CBWD1     |
| CREB3 | CCDC124   |
| CREB3 | CCDC144A  |
| CREB3 | CCDC159   |
| CREB3 | CCDC167   |
| CREB3 | CCDC174   |
| CREB3 | CCDC186   |
| CREB3 | CCDC25    |
| CREB3 | CCDC47    |
| CREB3 | CCDC57    |
| CREB3 | CCDC59    |
| CREB3 | CCDC69    |

|       |         |
|-------|---------|
| CREB3 | CCDC85A |
| CREB3 | CCNC    |
| CREB3 | CCPG1   |
| CREB3 | CCS     |
| CREB3 | CCT8    |
| CREB3 | CD164   |
| CREB3 | CD2AP   |
| CREB3 | CD2BP2  |
| CREB3 | CD38    |
| CREB3 | CD53    |
| CREB3 | CD63    |
| CREB3 | CD86    |
| CREB3 | CDC26   |
| CREB3 | CDC34   |
| CREB3 | CDC5L   |
| CREB3 | CDIPT   |
| CREB3 | CDK12   |
| CREB3 | CDK16   |
| CREB3 | CDK2AP2 |
| CREB3 | CDK9    |
| CREB3 | CDKN1B  |
| CREB3 | CDKN2C  |
| CREB3 | CDV3    |
| CREB3 | CEP128  |
| CREB3 | CEP350  |
| CREB3 | CETN2   |
| CREB3 | CGRRF1  |
| CREB3 | CHD2    |
| CREB3 | CHID1   |
| CREB3 | CHMP2A  |
| CREB3 | CHMP4A  |
| CREB3 | CHPF    |
| CREB3 | CHPF2   |
| CREB3 | CHRN1   |
| CREB3 | CHST12  |
| CREB3 | CHSY1   |
| CREB3 | CINP    |
| CREB3 | CISD2   |
| CREB3 | CITED2  |
| CREB3 | CKAP4   |
| CREB3 | CLCC1   |
| CREB3 | CLPB    |
| CREB3 | CLPTM1  |
| CREB3 | CLPTM1L |
| CREB3 | CLTB    |
| CREB3 | CNCSR1  |
| CREB3 | CNOT11  |
| CREB3 | CNPY2   |
| CREB3 | COA1    |
| CREB3 | COASY   |

|       |            |
|-------|------------|
| CREB3 | COG1       |
| CREB3 | COG3       |
| CREB3 | COL4A4     |
| CREB3 | COMMD3     |
| CREB3 | COMMD8     |
| CREB3 | COPA       |
| CREB3 | COPB1      |
| CREB3 | COPB2      |
| CREB3 | COPE       |
| CREB3 | COPG1      |
| CREB3 | COPS5      |
| CREB3 | COPZ1      |
| CREB3 | COQ10B     |
| CREB3 | COQ9       |
| CREB3 | COX14      |
| CREB3 | COX5B      |
| CREB3 | CPD        |
| CREB3 | CPEB4      |
| CREB3 | CPSF4      |
| CREB3 | CREB3      |
| CREB3 | CREB3L2    |
| CREB3 | CREBL2     |
| CREB3 | CREBZF     |
| CREB3 | CRELD2     |
| CREB3 | CRLS1      |
| CREB3 | CSAD       |
| CREB3 | CSDE1      |
| CREB3 | CSGALNACT2 |
| CREB3 | CSNK1E     |
| CREB3 | CSTB       |
| CREB3 | CTDNBP1    |
| CREB3 | CTDP1      |
| CREB3 | CTHRC1     |
| CREB3 | CTNNBIP1   |
| CREB3 | CTNBL1     |
| CREB3 | CTSA       |
| CREB3 | CTSD       |
| CREB3 | CTSZ       |
| CREB3 | CUTA       |
| CREB3 | CYB561D2   |
| CREB3 | CYB5R1     |
| CREB3 | CYB5R2     |
| CREB3 | CYCS       |
| CREB3 | CYLD       |
| CREB3 | CYP51A1    |
| CREB3 | CYTH2      |
| CREB3 | CYTIP      |
| CREB3 | DAD1       |
| CREB3 | DAP        |
| CREB3 | DAPL1      |

|       |         |
|-------|---------|
| CREB3 | DCAF11  |
| CREB3 | DCTN2   |
| CREB3 | DCTN3   |
| CREB3 | DCTN4   |
| CREB3 | DCXR    |
| CREB3 | DDT     |
| CREB3 | DDX51   |
| CREB3 | DECR1   |
| CREB3 | DEDD2   |
| CREB3 | DEF6    |
| CREB3 | DENND6B |
| CREB3 | DERL1   |
| CREB3 | DERL3   |
| CREB3 | DESI1   |
| CREB3 | DHCR7   |
| CREB3 | DHPS    |
| CREB3 | DHRS11  |
| CREB3 | DHRS7   |
| CREB3 | DHX36   |
| CREB3 | DLGAP4  |
| CREB3 | DNAJB1  |
| CREB3 | DNAJB11 |
| CREB3 | DNAJB9  |
| CREB3 | DNAJC1  |
| CREB3 | DNAJC10 |
| CREB3 | DNAJC25 |
| CREB3 | DNAJC3  |
| CREB3 | DNAJC4  |
| CREB3 | DNAJC7  |
| CREB3 | DNASE2  |
| CREB3 | DNPH1   |
| CREB3 | DNTTIP1 |
| CREB3 | DPAGT1  |
| CREB3 | DPM1    |
| CREB3 | DPM2    |
| CREB3 | DPM3    |
| CREB3 | DPP7    |
| CREB3 | DSTN    |
| CREB3 | DTX3    |
| CREB3 | DUSP22  |
| CREB3 | DUSP4   |
| CREB3 | DUSP5   |
| CREB3 | DYNLL1  |
| CREB3 | DYRK4   |
| CREB3 | EAF2    |
| CREB3 | EBAG9   |
| CREB3 | EBPL    |
| CREB3 | ECI2    |
| CREB3 | EDEM1   |
| CREB3 | EDEM2   |

|       |         |
|-------|---------|
| CREB3 | EDF1    |
| CREB3 | EEF1A1  |
| CREB3 | EEF1D   |
| CREB3 | EEF2    |
| CREB3 | EEF2KMT |
| CREB3 | EGLN2   |
| CREB3 | EGR3    |
| CREB3 | EHD4    |
| CREB3 | EIF1    |
| CREB3 | EIF1AD  |
| CREB3 | EIF2A   |
| CREB3 | EIF2B3  |
| CREB3 | EIF3G   |
| CREB3 | EIF3K   |
| CREB3 | EIF4A3  |
| CREB3 | EIF5    |
| CREB3 | ELL     |
| CREB3 | ELMOD2  |
| CREB3 | EMC10   |
| CREB3 | EMC2    |
| CREB3 | EMC3    |
| CREB3 | EMC4    |
| CREB3 | EMC9    |
| CREB3 | EMD     |
| CREB3 | EML2    |
| CREB3 | EN01    |
| CREB3 | EN02    |
| CREB3 | ENTPD1  |
| CREB3 | EPN2    |
| CREB3 | EPRS    |
| CREB3 | ERAL1   |
| CREB3 | ERCC1   |
| CREB3 | ERCC6   |
| CREB3 | ERGIC1  |
| CREB3 | ERGIC2  |
| CREB3 | ERGIC3  |
| CREB3 | ERLEC1  |
| CREB3 | ER01A   |
| CREB3 | ER01B   |
| CREB3 | ERP29   |
| CREB3 | ERP44   |
| CREB3 | ESC01   |
| CREB3 | ESRRA   |
| CREB3 | EVI2A   |
| CREB3 | EVI2B   |
| CREB3 | EXOSC1  |
| CREB3 | EXT1    |
| CREB3 | EXTL2   |
| CREB3 | FAAP20  |
| CREB3 | FADD    |

|       |           |
|-------|-----------|
| CREB3 | FAHD2B    |
| CREB3 | FAM118A   |
| CREB3 | FAM120A05 |
| CREB3 | FAM174A   |
| CREB3 | FAM177A1  |
| CREB3 | FAM3C     |
| CREB3 | FAM50A    |
| CREB3 | FAM69A    |
| CREB3 | FAM72C    |
| CREB3 | FAM89B    |
| CREB3 | FAM8A1    |
| CREB3 | FAM98A    |
| CREB3 | FAR1      |
| CREB3 | FARSA     |
| CREB3 | FASTK     |
| CREB3 | FAU       |
| CREB3 | FBX016    |
| CREB3 | FBX031    |
| CREB3 | FBXW2     |
| CREB3 | FBXW7     |
| CREB3 | FDXACB1   |
| CREB3 | FECH      |
| CREB3 | FIBP      |
| CREB3 | FIS1      |
| CREB3 | FKBP11    |
| CREB3 | FKBP1A    |
| CREB3 | FKBP2     |
| CREB3 | FKBP8     |
| CREB3 | FN3K      |
| CREB3 | FNDC3A    |
| CREB3 | FOXN3     |
| CREB3 | FOXO3     |
| CREB3 | FPGS      |
| CREB3 | FRA10AC1  |
| CREB3 | FRMD8     |
| CREB3 | FRZB      |
| CREB3 | FTH1      |
| CREB3 | FTL       |
| CREB3 | FTSJ1     |
| CREB3 | FUCA2     |
| CREB3 | FUNDC2    |
| CREB3 | FUT8      |
| CREB3 | FUZ       |
| CREB3 | FZD3      |
| CREB3 | G3BP2     |
| CREB3 | G6PD      |
| CREB3 | GABARAP   |
| CREB3 | GADD45A   |
| CREB3 | GADD45B   |
| CREB3 | GALK2     |

|       |         |
|-------|---------|
| CREB3 | GALNT14 |
| CREB3 | GALNT2  |
| CREB3 | GANAB   |
| CREB3 | GAS7    |
| CREB3 | GBF1    |
| CREB3 | GEMIN7  |
| CREB3 | GFPT1   |
| CREB3 | GGCX    |
| CREB3 | GHITM   |
| CREB3 | GIPC1   |
| CREB3 | GLA     |
| CREB3 | GLCCI1  |
| CREB3 | GLG1    |
| CREB3 | GLIPR1  |
| CREB3 | GLMP    |
| CREB3 | GLRX    |
| CREB3 | GLT8D1  |
| CREB3 | GMFG    |
| CREB3 | GMPPA   |
| CREB3 | GMPPB   |
| CREB3 | GNAI2   |
| CREB3 | GNAS    |
| CREB3 | GNB2    |
| CREB3 | GNG7    |
| CREB3 | GNL3L   |
| CREB3 | GNPNAT1 |
| CREB3 | GNPTG   |
| CREB3 | GOLGA1  |
| CREB3 | GOLGA2  |
| CREB3 | GOLGA4  |
| CREB3 | GOLGA7  |
| CREB3 | GOLGB1  |
| CREB3 | GOLIM4  |
| CREB3 | GOLT1B  |
| CREB3 | GORASP2 |
| CREB3 | GOSR2   |
| CREB3 | GOT1    |
| CREB3 | GPANK1  |
| CREB3 | GPR108  |
| CREB3 | GPR160  |
| CREB3 | GPR89B  |
| CREB3 | GRB2    |
| CREB3 | GRIPAP1 |
| CREB3 | GRK6    |
| CREB3 | GTF2A1  |
| CREB3 | GTF2B   |
| CREB3 | GTF3A   |
| CREB3 | GTF3C2  |
| CREB3 | GUK1    |
| CREB3 | GUSB    |

|       |          |
|-------|----------|
| CREB3 | H1FX     |
| CREB3 | HAGH     |
| CREB3 | HAX1     |
| CREB3 | HBP1     |
| CREB3 | HBS1L    |
| CREB3 | HCCS     |
| CREB3 | HCFC1R1  |
| CREB3 | HCST     |
| CREB3 | HDLBP    |
| CREB3 | HEBP2    |
| CREB3 | HELB     |
| CREB3 | HERPUD1  |
| CREB3 | HEXB     |
| CREB3 | HID1     |
| CREB3 | HINFP    |
| CREB3 | HINT1    |
| CREB3 | HIST1H1C |
| CREB3 | HLA-B    |
| CREB3 | HLA-DQA1 |
| CREB3 | HLA-DQB1 |
| CREB3 | HLA-DRB5 |
| CREB3 | HLA-E    |
| CREB3 | HLA-F    |
| CREB3 | HLCS     |
| CREB3 | HM13     |
| CREB3 | HMGCR    |
| CREB3 | HMOX1    |
| CREB3 | HOMER2   |
| CREB3 | HOOK2    |
| CREB3 | H0XA7    |
| CREB3 | H0XB7    |
| CREB3 | HSD17B10 |
| CREB3 | HSD17B7  |
| CREB3 | HSP90B1  |
| CREB3 | HSPA12A  |
| CREB3 | HSPA13   |
| CREB3 | HSPA5    |
| CREB3 | HTATIP2  |
| CREB3 | HYOU1    |
| CREB3 | IBTK     |
| CREB3 | ICAM2    |
| CREB3 | ICAM3    |
| CREB3 | IDH2     |
| CREB3 | IDH3A    |
| CREB3 | IDH3G    |
| CREB3 | IER2     |
| CREB3 | IER3IP1  |
| CREB3 | IFI27L2  |
| CREB3 | IFNAR1   |
| CREB3 | IFNG-AS1 |



|       |          |
|-------|----------|
| CREB3 | IFT27    |
| CREB3 | IFT74    |
| CREB3 | IGSF8    |
| CREB3 | IKBIP    |
| CREB3 | IL16     |
| CREB3 | IL4I1    |
| CREB3 | ILF2     |
| CREB3 | ILVBL    |
| CREB3 | IMMT     |
| CREB3 | IMPAD1   |
| CREB3 | ING3     |
| CREB3 | INPP4A   |
| CREB3 | INSIG1   |
| CREB3 | INSIG2   |
| CREB3 | INTS6    |
| CREB3 | INTS6L   |
| CREB3 | INTS7    |
| CREB3 | IQGAP2   |
| CREB3 | IRAK1    |
| CREB3 | IRF1     |
| CREB3 | IRF4     |
| CREB3 | ISCU     |
| CREB3 | ISG20    |
| CREB3 | ISOC2    |
| CREB3 | ITCH     |
| CREB3 | ITFG2    |
| CREB3 | ITGB2    |
| CREB3 | ITM2A    |
| CREB3 | ITM2B    |
| CREB3 | ITM2C    |
| CREB3 | JAGN1    |
| CREB3 | JCHAIN   |
| CREB3 | JMJD6    |
| CREB3 | JMJD8    |
| CREB3 | JMY      |
| CREB3 | JOSD2    |
| CREB3 | JUN      |
| CREB3 | JUNB     |
| CREB3 | KCNAB2   |
| CREB3 | KCNK12   |
| CREB3 | KCNK6    |
| CREB3 | KCNMA1   |
| CREB3 | KCNN3    |
| CREB3 | KCNN4    |
| CREB3 | KCTD20   |
| CREB3 | KDEL1R1  |
| CREB3 | KDEL1R2  |
| CREB3 | KDM8     |
| CREB3 | KEAP1    |
| CREB3 | KIAA0825 |

|       |          |
|-------|----------|
| CREB3 | KIAA0930 |
| CREB3 | KLC4     |
| CREB3 | KLF13    |
| CREB3 | KLHDC2   |
| CREB3 | KRTCAP2  |
| CREB3 | L3MBTL2  |
| CREB3 | LAGE3    |
| CREB3 | LAMP2    |
| CREB3 | LAMTOR1  |
| CREB3 | LAMTOR2  |
| CREB3 | LAP3     |
| CREB3 | LAPTM4A  |
| CREB3 | LARP1B   |
| CREB3 | LARP4    |
| CREB3 | LARS2    |
| CREB3 | LAX1     |
| CREB3 | LCORL    |
| CREB3 | LDAH     |
| CREB3 | LDLR     |
| CREB3 | LDLRAP1  |
| CREB3 | LEF1     |
| CREB3 | LEPROTL1 |
| CREB3 | LGALS1   |
| CREB3 | LMAN1    |
| CREB3 | LMBR1L   |
| CREB3 | LMBRD1   |
| CREB3 | LMF1     |
| CREB3 | LPIN1    |
| CREB3 | LRRC59   |
| CREB3 | LRRC8D   |
| CREB3 | LSP1     |
| CREB3 | LTBP3    |
| CREB3 | LY75     |
| CREB3 | LY96     |
| CREB3 | LYSMD3   |
| CREB3 | LZTFL1   |
| CREB3 | M6PR     |
| CREB3 | MAD2L1BP |
| CREB3 | MAGED1   |
| CREB3 | MAGEH1   |
| CREB3 | MAGOHB   |
| CREB3 | MAGT1    |
| CREB3 | MAN1A1   |
| CREB3 | MAN1A2   |
| CREB3 | MANF     |
| CREB3 | MAP1LC3A |
| CREB3 | MAP2K2   |
| CREB3 | MAP2K3   |
| CREB3 | MAP2K7   |
| CREB3 | MAPKAP1  |

|       |              |
|-------|--------------|
| CREB3 | MAPKAPK2     |
| CREB3 | MAPKAPK3     |
| CREB3 | MAPKAPK5-AS1 |
| CREB3 | MARCH6       |
| CREB3 | MARS         |
| CREB3 | MAX          |
| CREB3 | MBNL2        |
| CREB3 | MBTPS1       |
| CREB3 | MCCC2        |
| CREB3 | MCEE         |
| CREB3 | MCFD2        |
| CREB3 | MCL1         |
| CREB3 | MCUR1        |
| CREB3 | MEF2C        |
| CREB3 | MEF2D        |
| CREB3 | MEI1         |
| CREB3 | MESP1        |
| CREB3 | METTLL1      |
| CREB3 | METTLL23     |
| CREB3 | MFF          |
| CREB3 | MFSD14C      |
| CREB3 | MGAT1        |
| CREB3 | MGLL         |
| CREB3 | MGST2        |
| CREB3 | MIA3         |
| CREB3 | MIEN1        |
| CREB3 | MIF          |
| CREB3 | MIR4435-2HG  |
| CREB3 | MLEC         |
| CREB3 | MLF2         |
| CREB3 | MLX          |
| CREB3 | MLXIP        |
| CREB3 | MMAB         |
| CREB3 | MOCS2        |
| CREB3 | MOGS         |
| CREB3 | MON1B        |
| CREB3 | MORF4L2      |
| CREB3 | MOSPD1       |
| CREB3 | MPC1         |
| CREB3 | MPG          |
| CREB3 | MPHOSPH8     |
| CREB3 | MPV17        |
| CREB3 | MPV17L2      |
| CREB3 | MRPL15       |
| CREB3 | MRPL2        |
| CREB3 | MRPL23       |
| CREB3 | MRPL24       |
| CREB3 | MRPL40       |
| CREB3 | MRPL52       |
| CREB3 | MRPL54       |

|       |         |
|-------|---------|
| CREB3 | MRPL55  |
| CREB3 | MRPL57  |
| CREB3 | MRPS18A |
| CREB3 | MRPS33  |
| CREB3 | MRPS36  |
| CREB3 | MSL2    |
| CREB3 | MSRB1   |
| CREB3 | MT1X    |
| CREB3 | MTDH    |
| CREB3 | MTFR1   |
| CREB3 | MTRF1L  |
| CREB3 | MUL1    |
| CREB3 | MVP     |
| CREB3 | MXD4    |
| CREB3 | MYDGF   |
| CREB3 | MYL6    |
| CREB3 | MYO1G   |
| CREB3 | MZB1    |
| CREB3 | MZF1    |
| CREB3 | N4BP1   |
| CREB3 | N4BP2L1 |
| CREB3 | N4BP2L2 |
| CREB3 | NAA38   |
| CREB3 | NAB2    |
| CREB3 | NABP1   |
| CREB3 | NAGK    |
| CREB3 | NANS    |
| CREB3 | NAPA    |
| CREB3 | NARF    |
| CREB3 | NCK2    |
| CREB3 | NCLN    |
| CREB3 | NCSTN   |
| CREB3 | NDEL1   |
| CREB3 | NDFIP1  |
| CREB3 | NDFIP2  |
| CREB3 | NDUFA1  |
| CREB3 | NDUFA11 |
| CREB3 | NDUFA13 |
| CREB3 | NDUFA4  |
| CREB3 | NDUFA7  |
| CREB3 | NDUFAB1 |
| CREB3 | NDUFAF3 |
| CREB3 | NDUFB2  |
| CREB3 | NDUFB4  |
| CREB3 | NDUFB6  |
| CREB3 | NDUFS2  |
| CREB3 | NDUFS6  |
| CREB3 | NDUFS8  |
| CREB3 | NDUFV1  |
| CREB3 | NDUFV3  |

|       |        |
|-------|--------|
| CREB3 | NEAT1  |
| CREB3 | NECAP1 |
| CREB3 | NEDD9  |
| CREB3 | NEK1   |
| CREB3 | NELFE  |
| CREB3 | NENF   |
| CREB3 | NET1   |
| CREB3 | NEU1   |
| CREB3 | NFS1   |
| CREB3 | NFXL1  |
| CREB3 | NGLY1  |
| CREB3 | NIPA2  |
| CREB3 | NKAP   |
| CREB3 | NLRC3  |
| CREB3 | NME7   |
| CREB3 | NOL7   |
| CREB3 | NOM01  |
| CREB3 | NOP10  |
| CREB3 | NOSIP  |
| CREB3 | NPRL2  |
| CREB3 | NRBF2  |
| CREB3 | NRBP1  |
| CREB3 | NRDC   |
| CREB3 | NSD1   |
| CREB3 | NSFL1C |
| CREB3 | NT5C2  |
| CREB3 | NT5C3A |
| CREB3 | NT5DC2 |
| CREB3 | NT5DC3 |
| CREB3 | NTMT1  |
| CREB3 | NUBPL  |
| CREB3 | NUCB2  |
| CREB3 | NUDT2  |
| CREB3 | NUDT6  |
| CREB3 | NUMB   |
| CREB3 | NUPL2  |
| CREB3 | NUS1   |
| CREB3 | NXPE3  |
| CREB3 | OAZ1   |
| CREB3 | ODF3B  |
| CREB3 | OGFOD2 |
| CREB3 | ORMDL1 |
| CREB3 | ORMDL2 |
| CREB3 | OS9    |
| CREB3 | OSBP   |
| CREB3 | OSBPL2 |
| CREB3 | OST4   |
| CREB3 | OSTC   |
| CREB3 | OSTF1  |
| CREB3 | OTUD1  |

|       |         |
|-------|---------|
| CREB3 | OTUD7A  |
| CREB3 | P4HB    |
| CREB3 | PAIP2B  |
| CREB3 | PANK3   |
| CREB3 | PAPOLA  |
| CREB3 | PAPSS1  |
| CREB3 | PARVG   |
| CREB3 | PAXBP1  |
| CREB3 | PBDC1   |
| CREB3 | PCBP1   |
| CREB3 | PDAP1   |
| CREB3 | PDHB    |
| CREB3 | PDIA3   |
| CREB3 | PDIA4   |
| CREB3 | PDIA6   |
| CREB3 | PDK1    |
| CREB3 | PDK2    |
| CREB3 | PDXK    |
| CREB3 | PEBP1   |
| CREB3 | PEPD    |
| CREB3 | PET100  |
| CREB3 | PEX2    |
| CREB3 | PGAM1   |
| CREB3 | PGK1    |
| CREB3 | PGM1    |
| CREB3 | PGM3    |
| CREB3 | PGP     |
| CREB3 | PGPEP1  |
| CREB3 | PGRMC2  |
| CREB3 | PHACTR1 |
| CREB3 | PHF19   |
| CREB3 | PHPT1   |
| CREB3 | PHYH    |
| CREB3 | PICK1   |
| CREB3 | PIGH    |
| CREB3 | PIGP    |
| CREB3 | PIK3C2A |
| CREB3 | PIM2    |
| CREB3 | PINK1   |
| CREB3 | PITPNA  |
| CREB3 | PITPNB  |
| CREB3 | PJA1    |
| CREB3 | PJA2    |
| CREB3 | PKHD1L1 |
| CREB3 | PLD3    |
| CREB3 | PLD4    |
| CREB3 | PLOD3   |
| CREB3 | PLPP5   |
| CREB3 | PMVK    |
| CREB3 | PNKP    |

|       |          |
|-------|----------|
| CREB3 | PNOC     |
| CREB3 | PNPLA8   |
| CREB3 | PODXL2   |
| CREB3 | POGLUT1  |
| CREB3 | POLDIP2  |
| CREB3 | POLH     |
| CREB3 | POLR3D   |
| CREB3 | POMP     |
| CREB3 | POP5     |
| CREB3 | POP7     |
| CREB3 | PORCN    |
| CREB3 | PPCDC    |
| CREB3 | PPIB     |
| CREB3 | PPIF     |
| CREB3 | PPP1R11  |
| CREB3 | PPP1R14B |
| CREB3 | PPP1R15A |
| CREB3 | PPP2R5B  |
| CREB3 | PPP3R1   |
| CREB3 | PPTC7    |
| CREB3 | PRADC1   |
| CREB3 | PRAF2    |
| CREB3 | PRCP     |
| CREB3 | PRDM1    |
| CREB3 | PRDX2    |
| CREB3 | PRDX4    |
| CREB3 | PREB     |
| CREB3 | PRKAR2B  |
| CREB3 | PRKCSH   |
| CREB3 | PRKCZ    |
| CREB3 | PRKD2    |
| CREB3 | PRMT2    |
| CREB3 | PRPF3    |
| CREB3 | PRPF4B   |
| CREB3 | PRPF6    |
| CREB3 | PRPS1    |
| CREB3 | PRRC1    |
| CREB3 | PSMA1    |
| CREB3 | PSMA5    |
| CREB3 | PSMB1    |
| CREB3 | PSMB10   |
| CREB3 | PSMB2    |
| CREB3 | PSMB3    |
| CREB3 | PSMB4    |
| CREB3 | PSMB6    |
| CREB3 | PSMC3    |
| CREB3 | PSMC4    |
| CREB3 | PSMC5    |
| CREB3 | PSMC6    |
| CREB3 | PSMD12   |

|       |            |
|-------|------------|
| CREB3 | PSMD13     |
| CREB3 | PSMD2      |
| CREB3 | PSMD3      |
| CREB3 | PSMD6      |
| CREB3 | PSMD7      |
| CREB3 | PSMD8      |
| CREB3 | PSME4      |
| CREB3 | PSMF1      |
| CREB3 | PSMG3      |
| CREB3 | PTGIR      |
| CREB3 | PTPN23     |
| CREB3 | PTPN6      |
| CREB3 | PTPRN2     |
| CREB3 | PTS        |
| CREB3 | PUS7L      |
| CREB3 | PYHIN1     |
| CREB3 | QPCT       |
| CREB3 | QTRT1      |
| CREB3 | RAB10      |
| CREB3 | RAB11B     |
| CREB3 | RAB11B-AS1 |
| CREB3 | RAB18      |
| CREB3 | RAB1A      |
| CREB3 | RAB21      |
| CREB3 | RAB27A     |
| CREB3 | RAB2A      |
| CREB3 | RAB39B     |
| CREB3 | RAB6A      |
| CREB3 | RAB8A      |
| CREB3 | RABAC1     |
| CREB3 | RABGGTA    |
| CREB3 | RACK1      |
| CREB3 | RASAL3     |
| CREB3 | RASSF5     |
| CREB3 | RBBP5      |
| CREB3 | RBBP6      |
| CREB3 | RBM18      |
| CREB3 | RBM3       |
| CREB3 | RBM4       |
| CREB3 | RBM47      |
| CREB3 | RCN1       |
| CREB3 | RDH11      |
| CREB3 | REEP3      |
| CREB3 | REEP5      |
| CREB3 | RER1       |
| CREB3 | REX02      |
| CREB3 | RFESD      |
| CREB3 | RGS1       |
| CREB3 | RGS2       |
| CREB3 | RHEB       |



|       |          |
|-------|----------|
| CREB3 | RIDA     |
| CREB3 | RIOK2    |
| CREB3 | RNASE4   |
| CREB3 | RNASEH1  |
| CREB3 | RNASEL   |
| CREB3 | RNF103   |
| CREB3 | RNF11    |
| CREB3 | RNF113A  |
| CREB3 | RNF114   |
| CREB3 | RNF139   |
| CREB3 | RNF149   |
| CREB3 | RNF181   |
| CREB3 | RNH1     |
| CREB3 | RPAP1    |
| CREB3 | RPL10    |
| CREB3 | RPL13A   |
| CREB3 | RPL15    |
| CREB3 | RPL19    |
| CREB3 | RPL23A   |
| CREB3 | RPL3     |
| CREB3 | RPL32    |
| CREB3 | RPL35A   |
| CREB3 | RPL36AL  |
| CREB3 | RPL41    |
| CREB3 | RPL5     |
| CREB3 | RPLP0    |
| CREB3 | RPLP1    |
| CREB3 | RPLP2    |
| CREB3 | RPN1     |
| CREB3 | RPN2     |
| CREB3 | RPS11    |
| CREB3 | RPS12    |
| CREB3 | RPS13    |
| CREB3 | RPS19    |
| CREB3 | RPS19BP1 |
| CREB3 | RPS26    |
| CREB3 | RPS27L   |
| CREB3 | RPS28    |
| CREB3 | RPS29    |
| CREB3 | RPS3     |
| CREB3 | RPS4X    |
| CREB3 | RPS6KB2  |
| CREB3 | RPS9     |
| CREB3 | RPSA     |
| CREB3 | RRAGD    |
| CREB3 | RRBP1    |
| CREB3 | RSU1     |
| CREB3 | RTCA     |
| CREB3 | RTF1     |
| CREB3 | RTN3     |

|       |         |
|-------|---------|
| CREB3 | RUNX1   |
| CREB3 | RWDD1   |
| CREB3 | RWDD2B  |
| CREB3 | RWDD4   |
| CREB3 | RXRB    |
| CREB3 | S100A11 |
| CREB3 | SAMD4B  |
| CREB3 | SAMM50  |
| CREB3 | SAP18   |
| CREB3 | SAP30BP |
| CREB3 | SAR1A   |
| CREB3 | SAR1B   |
| CREB3 | SARAF   |
| CREB3 | SARS    |
| CREB3 | SART1   |
| CREB3 | SASH3   |
| CREB3 | SAT1    |
| CREB3 | SCAMP1  |
| CREB3 | SCAMP2  |
| CREB3 | SCAMP3  |
| CREB3 | SCAMP4  |
| CREB3 | SCAND1  |
| CREB3 | SCFD1   |
| CREB3 | SCPEP1  |
| CREB3 | SCYL1   |
| CREB3 | SDAD1   |
| CREB3 | SDF2L1  |
| CREB3 | SDF4    |
| CREB3 | SDHAF1  |
| CREB3 | SDHC    |
| CREB3 | SEC11C  |
| CREB3 | SEC13   |
| CREB3 | SEC22A  |
| CREB3 | SEC22B  |
| CREB3 | SEC22C  |
| CREB3 | SEC23B  |
| CREB3 | SEC24A  |
| CREB3 | SEC24C  |
| CREB3 | SEC24D  |
| CREB3 | SEC31A  |
| CREB3 | SEC61A1 |
| CREB3 | SEC61B  |
| CREB3 | SEC61G  |
| CREB3 | SEC62   |
| CREB3 | SEC63   |
| CREB3 | SEL1L   |
| CREB3 | SEL1L3  |
| CREB3 | SELPLG  |
| CREB3 | SENP8   |
| CREB3 | SERF2   |

|       |          |
|-------|----------|
| CREB3 | SERINC3  |
| CREB3 | SERP1    |
| CREB3 | SERTAD3  |
| CREB3 | SF3B2    |
| CREB3 | SF3B5    |
| CREB3 | SFMBT2   |
| CREB3 | SGK3     |
| CREB3 | SGTA     |
| CREB3 | SH3GLB1  |
| CREB3 | SHANK2   |
| CREB3 | SHC1     |
| CREB3 | SHMT2    |
| CREB3 | SIL1     |
| CREB3 | SIRT2    |
| CREB3 | SKAP1    |
| CREB3 | SLC10A7  |
| CREB3 | SLC16A3  |
| CREB3 | SLC17A9  |
| CREB3 | SLC1A4   |
| CREB3 | SLC1A5   |
| CREB3 | SLC22A18 |
| CREB3 | SLC25A22 |
| CREB3 | SLC25A28 |
| CREB3 | SLC25A29 |
| CREB3 | SLC25A3  |
| CREB3 | SLC25A39 |
| CREB3 | SLC25A42 |
| CREB3 | SLC25A45 |
| CREB3 | SLC25A46 |
| CREB3 | SLC2A8   |
| CREB3 | SLC30A5  |
| CREB3 | SLC30A7  |
| CREB3 | SLC31A2  |
| CREB3 | SLC33A1  |
| CREB3 | SLC35B1  |
| CREB3 | SLC35B2  |
| CREB3 | SLC35C1  |
| CREB3 | SLC35C2  |
| CREB3 | SLC35E1  |
| CREB3 | SLC35F6  |
| CREB3 | SLC38A10 |
| CREB3 | SLC38A2  |
| CREB3 | SLC38A5  |
| CREB3 | SLC39A11 |
| CREB3 | SLC39A6  |
| CREB3 | SLC39A7  |
| CREB3 | SLC39A8  |
| CREB3 | SLC3A2   |
| CREB3 | SLC44A1  |
| CREB3 | SLC4A2   |

|       |          |
|-------|----------|
| CREB3 | SLC50A1  |
| CREB3 | SLC52A2  |
| CREB3 | SLC7A11  |
| CREB3 | SLC9A3R1 |
| CREB3 | SLC04A1  |
| CREB3 | SMAD5    |
| CREB3 | SMDT1    |
| CREB3 | SMU1     |
| CREB3 | SMUG1    |
| CREB3 | SNAP29   |
| CREB3 | SNAPC3   |
| CREB3 | SND1     |
| CREB3 | SND1-IT1 |
| CREB3 | SNF8     |
| CREB3 | SNHG21   |
| CREB3 | SNRPC    |
| CREB3 | SNRPD2   |
| CREB3 | SNRPN    |
| CREB3 | SNU13    |
| CREB3 | SNURF    |
| CREB3 | SNX16    |
| CREB3 | SNX18    |
| CREB3 | SNX9     |
| CREB3 | SOC3     |
| CREB3 | SPAG7    |
| CREB3 | SPAG9    |
| CREB3 | SPATS2   |
| CREB3 | SPCS1    |
| CREB3 | SPINT2   |
| CREB3 | SPNS1    |
| CREB3 | SPSB1    |
| CREB3 | SPSB3    |
| CREB3 | SPTSSA   |
| CREB3 | SPTY2D1  |
| CREB3 | SQLC     |
| CREB3 | SQSTM1   |
| CREB3 | SRBD1    |
| CREB3 | SRD5A3   |
| CREB3 | SREBF2   |
| CREB3 | SRGN     |
| CREB3 | SRM      |
| CREB3 | SRP14    |
| CREB3 | SRP19    |
| CREB3 | SRP54    |
| CREB3 | SRP68    |
| CREB3 | SRP72    |
| CREB3 | SRPRA    |
| CREB3 | SRRM2    |
| CREB3 | SRSF1    |
| CREB3 | SS18L2   |

|       |            |
|-------|------------|
| CREB3 | SSNA1      |
| CREB3 | SSR1       |
| CREB3 | SSR3       |
| CREB3 | SSR4       |
| CREB3 | SSSCA1     |
| CREB3 | ST6GAL1    |
| CREB3 | ST6GALNAC4 |
| CREB3 | ST7        |
| CREB3 | ST8SIA4    |
| CREB3 | STAMBPL1   |
| CREB3 | STK10      |
| CREB3 | STK17B     |
| CREB3 | STK25      |
| CREB3 | STT3A      |
| CREB3 | STT3B      |
| CREB3 | STUB1      |
| CREB3 | STX5       |
| CREB3 | STXBP6     |
| CREB3 | SUB1       |
| CREB3 | SUCLG1     |
| CREB3 | SUPT5H     |
| CREB3 | SURF4      |
| CREB3 | SWSAP1     |
| CREB3 | SYNGR1     |
| CREB3 | SYS1       |
| CREB3 | SYTL1      |
| CREB3 | SYVN1      |
| CREB3 | TAF7       |
| CREB3 | TANG02     |
| CREB3 | TARSL2     |
| CREB3 | TAX1BP1    |
| CREB3 | TBC1D15    |
| CREB3 | TBC1D20    |
| CREB3 | TBC1D22A   |
| CREB3 | TBC1D4     |
| CREB3 | TBC1D7     |
| CREB3 | TCAF1      |
| CREB3 | TCEAL8     |
| CREB3 | TCEAL9     |
| CREB3 | TCF25      |
| CREB3 | TCF4       |
| CREB3 | TCTA       |
| CREB3 | TDG        |
| CREB3 | TDRD3      |
| CREB3 | TECR       |
| CREB3 | TFG        |
| CREB3 | TGDS       |
| CREB3 | THAP7      |
| CREB3 | THEMIS2    |
| CREB3 | TIMM10B    |

|       |          |
|-------|----------|
| CREB3 | TIMM17A  |
| CREB3 | TIMM9    |
| CREB3 | TIMP1    |
| CREB3 | TINF2    |
| CREB3 | TIPRL    |
| CREB3 | TLR1     |
| CREB3 | TM2D2    |
| CREB3 | TM7SF2   |
| CREB3 | TM9SF1   |
| CREB3 | TM9SF2   |
| CREB3 | TM9SF3   |
| CREB3 | TMBIM1   |
| CREB3 | TMBIM4   |
| CREB3 | TMBIM6   |
| CREB3 | TMC6     |
| CREB3 | TMC01    |
| CREB3 | TMED1    |
| CREB3 | TMED10   |
| CREB3 | TMED2    |
| CREB3 | TMED3    |
| CREB3 | TMED4    |
| CREB3 | TMED7    |
| CREB3 | TMED9    |
| CREB3 | TMEM101  |
| CREB3 | TMEM126A |
| CREB3 | TMEM147  |
| CREB3 | TMEM160  |
| CREB3 | TMEM161B |
| CREB3 | TMEM165  |
| CREB3 | TMEM167A |
| CREB3 | TMEM170A |
| CREB3 | TMEM179B |
| CREB3 | TMEM199  |
| CREB3 | TMEM214  |
| CREB3 | TMEM219  |
| CREB3 | TMEM230  |
| CREB3 | TMEM243  |
| CREB3 | TMEM248  |
| CREB3 | TMEM258  |
| CREB3 | TMEM263  |
| CREB3 | TMEM30A  |
| CREB3 | TMEM39A  |
| CREB3 | TMEM50B  |
| CREB3 | TMEM59   |
| CREB3 | TMEM70   |
| CREB3 | TMEM87A  |
| CREB3 | TMEM9    |
| CREB3 | TMF1     |
| CREB3 | TMSB10   |
| CREB3 | TMSB4X   |

|       |              |
|-------|--------------|
| CREB3 | TMUB1        |
| CREB3 | TNFAIP8L2    |
| CREB3 | TNFRSF14     |
| CREB3 | TNFRSF1B     |
| CREB3 | TNFRSF9      |
| CREB3 | TOLLIP       |
| CREB3 | TOMM20       |
| CREB3 | TOP3B        |
| CREB3 | TOR3A        |
| CREB3 | TP53BP1      |
| CREB3 | TP53INP1     |
| CREB3 | TPD52        |
| CREB3 | TPI1         |
| CREB3 | TPP2         |
| CREB3 | TPRA1        |
| CREB3 | TPST2        |
| CREB3 | TPT1         |
| CREB3 | TRABD        |
| CREB3 | TRAF3        |
| CREB3 | TRAF3IP2-AS1 |
| CREB3 | TRAF6        |
| CREB3 | TRAM1        |
| CREB3 | TRAPPC2B     |
| CREB3 | TRAPPC2L     |
| CREB3 | TRAPPC3      |
| CREB3 | TRAPPC6A     |
| CREB3 | TRIB1        |
| CREB3 | TRIM11       |
| CREB3 | TRIM27       |
| CREB3 | TRIP11       |
| CREB3 | TRIP4        |
| CREB3 | TRMT61B      |
| CREB3 | TRPV2        |
| CREB3 | TSC22D1      |
| CREB3 | TSC22D4      |
| CREB3 | TSPAN13      |
| CREB3 | TSPAN31      |
| CREB3 | TSPYL2       |
| CREB3 | TSTA3        |
| CREB3 | TTC1         |
| CREB3 | TTC17        |
| CREB3 | TTC3         |
| CREB3 | TTC33        |
| CREB3 | TUSC2        |
| CREB3 | TUT1         |
| CREB3 | TVP23B       |
| CREB3 | TWSG1        |
| CREB3 | TXLNA        |
| CREB3 | TXN          |
| CREB3 | TXNDC11      |

|       |          |
|-------|----------|
| CREB3 | TXNDC12  |
| CREB3 | TXNDC15  |
| CREB3 | TXNDC5   |
| CREB3 | TXNL1    |
| CREB3 | TXNL4A   |
| CREB3 | TYMP     |
| CREB3 | UAP1     |
| CREB3 | UBA5     |
| CREB3 | UBA52    |
| CREB3 | UBA6-AS1 |
| CREB3 | UBALD1   |
| CREB3 | UBALD2   |
| CREB3 | UBB      |
| CREB3 | UBC      |
| CREB3 | UBE2D2   |
| CREB3 | UBE2D4   |
| CREB3 | UBE2J1   |
| CREB3 | UBE2K    |
| CREB3 | UBE2Q1   |
| CREB3 | UBFD1    |
| CREB3 | UBL5     |
| CREB3 | UBN1     |
| CREB3 | UBN2     |
| CREB3 | UBXN4    |
| CREB3 | UCHL5    |
| CREB3 | UFC1     |
| CREB3 | UFL1     |
| CREB3 | UFM1     |
| CREB3 | UFSP2    |
| CREB3 | UGDH     |
| CREB3 | UNC13D   |
| CREB3 | UNC50    |
| CREB3 | UNC93B1  |
| CREB3 | UPF2     |
| CREB3 | UPP1     |
| CREB3 | UQCR10   |
| CREB3 | UQCR11   |
| CREB3 | UQCRB    |
| CREB3 | UQCRFS1  |
| CREB3 | UROD     |
| CREB3 | US01     |
| CREB3 | USP14    |
| CREB3 | USP16    |
| CREB3 | USP3     |
| CREB3 | USP40    |
| CREB3 | USP48    |
| CREB3 | UTP11    |
| CREB3 | UTP23    |
| CREB3 | VAMP2    |
| CREB3 | VCP      |



|       |          |
|-------|----------|
| CREB3 | VDAC1    |
| CREB3 | VDAC3    |
| CREB3 | VKORC1   |
| CREB3 | VKORC1L1 |
| CREB3 | VMA21    |
| CREB3 | VMP1     |
| CREB3 | VOPP1    |
| CREB3 | VPS41    |
| CREB3 | VPS53    |
| CREB3 | VRK3     |
| CREB3 | WDR92    |
| CREB3 | WFS1     |
| CREB3 | WIPI1    |
| CREB3 | WWOX     |
| CREB3 | XBP1     |
| CREB3 | XIAP     |
| CREB3 | XRRA1    |
| CREB3 | YBX1     |
| CREB3 | YIF1A    |
| CREB3 | YIF1B    |
| CREB3 | YIPF1    |
| CREB3 | YIPF2    |
| CREB3 | YIPF3    |
| CREB3 | YIPF5    |
| CREB3 | YIPF6    |
| CREB3 | YKT6     |
| CREB3 | YPEL5    |
| CREB3 | YWHAB    |
| CREB3 | ZAP70    |
| CREB3 | ZBP1     |
| CREB3 | ZBTB1    |
| CREB3 | ZBTB45   |
| CREB3 | ZBTB7B   |
| CREB3 | ZBTB80S  |
| CREB3 | ZC3H12A  |
| CREB3 | ZC3H15   |
| CREB3 | ZCWPW1   |
| CREB3 | ZDHHC3   |
| CREB3 | ZFAND2A  |
| CREB3 | ZFAND5   |
| CREB3 | ZFAT     |
| CREB3 | ZFP36L2  |
| CREB3 | ZFPL1    |
| CREB3 | ZHX2     |
| CREB3 | ZNF215   |
| CREB3 | ZNF226   |
| CREB3 | ZNF275   |
| CREB3 | ZNF276   |
| CREB3 | ZNF3     |
| CREB3 | ZNF331   |

|         |         |
|---------|---------|
| CREB3   | ZNF335  |
| CREB3   | ZNF552  |
| CREB3   | ZNF566  |
| CREB3   | ZNF574  |
| CREB3   | ZNF593  |
| CREB3   | ZNF598  |
| CREB3   | ZNF670  |
| CREB3   | ZNF706  |
| CREB3   | ZNF708  |
| CREB3   | ZNF720  |
| CREB3   | ZNF791  |
| CREB3   | ZNHIT1  |
| CREB3   | ZNHIT2  |
| CREB3   | ZRANB2  |
| CREB3   | ZRSR2   |
| CREB3   | ZSWIM7  |
| CREB3   | ZW10    |
| CREB3L2 | AACS    |
| CREB3L2 | AARS    |
| CREB3L2 | ABCC4   |
| CREB3L2 | ABCF3   |
| CREB3L2 | ABHD17A |
| CREB3L2 | ABTB1   |
| CREB3L2 | ACADVL  |
| CREB3L2 | ACBD3   |
| CREB3L2 | AC02    |
| CREB3L2 | ACOT13  |
| CREB3L2 | ADAM10  |
| CREB3L2 | ADAR    |
| CREB3L2 | ADD1    |
| CREB3L2 | ADPGK   |
| CREB3L2 | AGPAT1  |
| CREB3L2 | AIFM2   |
| CREB3L2 | AKAP5   |
| CREB3L2 | AKAP9   |
| CREB3L2 | AKR1A1  |
| CREB3L2 | ALDH1L2 |
| CREB3L2 | ALDOC   |
| CREB3L2 | ALG1    |
| CREB3L2 | ALG2    |
| CREB3L2 | ALG3    |
| CREB3L2 | ALKBH5  |
| CREB3L2 | AMPD2   |
| CREB3L2 | ANAPC13 |
| CREB3L2 | ANG     |
| CREB3L2 | ANKRD12 |
| CREB3L2 | ANKRD28 |
| CREB3L2 | ANKRD39 |
| CREB3L2 | ANXA11  |
| CREB3L2 | ANXA6   |

CREB3L2 AP2A1  
CREB3L2 AP3D1  
CREB3L2 APTX  
CREB3L2 ARCN1  
CREB3L2 AREG  
CREB3L2 ARF1  
CREB3L2 ARF4  
CREB3L2 ARFGAP1  
CREB3L2 ARFGAP3  
CREB3L2 ARFIP2  
CREB3L2 ARHGAP24  
CREB3L2 ARID1B  
CREB3L2 ARID3A  
CREB3L2 ARID3B  
CREB3L2 ARL1  
CREB3L2 ARMCX3  
CREB3L2 ARMCX6  
CREB3L2 ATF7  
CREB3L2 ATG101  
CREB3L2 ATG13  
CREB3L2 ATG3  
CREB3L2 ATG4C  
CREB3L2 ATMIN  
CREB3L2 ATP2A2  
CREB3L2 ATP6AP1  
CREB3L2 ATP6AP2  
CREB3L2 ATP6V0A1  
CREB3L2 ATP6V0B  
CREB3L2 ATP6V0E1  
CREB3L2 ATP6V1D  
CREB3L2 ATRAID  
CREB3L2 ATXN1  
CREB3L2 B3GAT3  
CREB3L2 B4GALT3  
CREB3L2 B9D1  
CREB3L2 BAZ2A  
CREB3L2 BBIP1  
CREB3L2 BCAP31  
CREB3L2 BCKDK  
CREB3L2 BET1  
CREB3L2 BEX5  
CREB3L2 BHLHE41  
CREB3L2 BLNK  
CREB3L2 BLOC1S3  
CREB3L2 BRD2  
CREB3L2 BSG  
CREB3L2 BTG2  
CREB3L2 C16orf95  
CREB3L2 C19orf24  
CREB3L2 C19orf53

CREB3L2 C1GALT1C1  
CREB3L2 C21orf2  
CREB3L2 C2CD2L  
CREB3L2 C2orf74  
CREB3L2 CALCOC01  
CREB3L2 CALR  
CREB3L2 CALU  
CREB3L2 CANX  
CREB3L2 CAPN10  
CREB3L2 CASP8  
CREB3L2 CCDC112  
CREB3L2 CCDC144A  
CREB3L2 CCDC159  
CREB3L2 CCDC167  
CREB3L2 CCDC174  
CREB3L2 CCDC47  
CREB3L2 CCDC57  
CREB3L2 CCDC88A  
CREB3L2 CCNC  
CREB3L2 CCNL1  
CREB3L2 CCPG1  
CREB3L2 CCR10  
CREB3L2 CD2BP2  
CREB3L2 CD38  
CREB3L2 CD59  
CREB3L2 CD63  
CREB3L2 CDC42SE1  
CREB3L2 CDIPT  
CREB3L2 CDK12  
CREB3L2 CDK2AP2  
CREB3L2 CDK6  
CREB3L2 CELF2  
CREB3L2 CENPA  
CREB3L2 CERCAM  
CREB3L2 CFDP1  
CREB3L2 CGGBP1  
CREB3L2 CHCHD2  
CREB3L2 CHID1  
CREB3L2 CHP1  
CREB3L2 CHPF  
CREB3L2 CHRNB1  
CREB3L2 CHST11  
CREB3L2 CHST12  
CREB3L2 CISD2  
CREB3L2 CITED2  
CREB3L2 CKAP4  
CREB3L2 CLCC1  
CREB3L2 CLCN3  
CREB3L2 CLIC4  
CREB3L2 CLINT1

CREB3L2 CLIP4  
CREB3L2 CLK1  
CREB3L2 CLPTM1  
CREB3L2 CLPTM1L  
CREB3L2 CNPY2  
CREB3L2 COMMD1  
CREB3L2 COMMD3  
CREB3L2 COPA  
CREB3L2 COPB1  
CREB3L2 COPB2  
CREB3L2 COPE  
CREB3L2 COPG1  
CREB3L2 COPZ1  
CREB3L2 COX18  
CREB3L2 COX5B  
CREB3L2 CREB3  
CREB3L2 CREB3L2  
CREB3L2 CREG1  
CREB3L2 CRELD2  
CREB3L2 CRIPT  
CREB3L2 CSNK1E  
CREB3L2 CSNK2A2  
CREB3L2 CTBP1-AS  
CREB3L2 CTDNEP1  
CREB3L2 CTSA  
CREB3L2 CTSD  
CREB3L2 CUTA  
CREB3L2 CXorf40B  
CREB3L2 CYCS  
CREB3L2 CYTIP  
CREB3L2 DAD1  
CREB3L2 DCAF8  
CREB3L2 DCTN5  
CREB3L2 DDHD1  
CREB3L2 DECR1  
CREB3L2 DEDD2  
CREB3L2 DENND1B  
CREB3L2 DERL1  
CREB3L2 DERL3  
CREB3L2 DEXI  
CREB3L2 DGAT1  
CREB3L2 DGKH  
CREB3L2 DHRS7  
CREB3L2 DHRS9  
CREB3L2 DIAPH3  
CREB3L2 DID01  
CREB3L2 DNAJB11  
CREB3L2 DNAJB12  
CREB3L2 DNAJB9  
CREB3L2 DNAJC1

CREB3L2 DNAJC25  
CREB3L2 DNAJC3  
CREB3L2 DNAJC4  
CREB3L2 DNAJC7  
CREB3L2 DNASE2  
CREB3L2 DPM2  
CREB3L2 DPM3  
CREB3L2 DSTN  
CREB3L2 DYRK4  
CREB3L2 EBAG9  
CREB3L2 EDEM1  
CREB3L2 EDEM2  
CREB3L2 EEF2  
CREB3L2 EIF3G  
CREB3L2 EIF3K  
CREB3L2 EIF4G1  
CREB3L2 EIF5  
CREB3L2 ELL  
CREB3L2 ELMOD2  
CREB3L2 EMC10  
CREB3L2 EMC2  
CREB3L2 EMC3  
CREB3L2 EMC4  
CREB3L2 EMC9  
CREB3L2 EMD  
CREB3L2 ENAM  
CREB3L2 ENTPD1  
CREB3L2 EPB41  
CREB3L2 EPOR  
CREB3L2 EPRS  
CREB3L2 ERC1  
CREB3L2 ERF  
CREB3L2 ERGIC2  
CREB3L2 ERGIC3  
CREB3L2 ERLEC1  
CREB3L2 ER01A  
CREB3L2 ERP29  
CREB3L2 ERP44  
CREB3L2 ETNK1  
CREB3L2 EXD2  
CREB3L2 EXOC4  
CREB3L2 FADS1  
CREB3L2 FAM117A  
CREB3L2 FAM174A  
CREB3L2 FAM177A1  
CREB3L2 FAM193A  
CREB3L2 FAM214A  
CREB3L2 FAM3C  
CREB3L2 FAM50A  
CREB3L2 FAM83D

CREB3L2 FAM91A1  
CREB3L2 FAM98A  
CREB3L2 FASTK  
CREB3L2 FAU  
CREB3L2 FBX025  
CREB3L2 FBX033  
CREB3L2 FBXW11  
CREB3L2 FBXW5  
CREB3L2 FCMR  
CREB3L2 FECH  
CREB3L2 FIS1  
CREB3L2 FKBP11  
CREB3L2 FKBP14  
CREB3L2 FKBP2  
CREB3L2 FN3KRP  
CREB3L2 FNDC3A  
CREB3L2 FOS  
CREB3L2 FOXN3  
CREB3L2 FOXO3  
CREB3L2 FTL  
CREB3L2 FTSJ1  
CREB3L2 FUCA2  
CREB3L2 FUT8  
CREB3L2 GABARAP  
CREB3L2 GADD45B  
CREB3L2 GALNS  
CREB3L2 GALNT2  
CREB3L2 GANAB  
CREB3L2 GAS2L3  
CREB3L2 GBF1  
CREB3L2 GCLC  
CREB3L2 GFPT1  
CREB3L2 GHITM  
CREB3L2 GLA  
CREB3L2 GLMP  
CREB3L2 GLRX  
CREB3L2 GLT8D1  
CREB3L2 GMPPA  
CREB3L2 GMPPB  
CREB3L2 GNPAT1  
CREB3L2 GOLGA2  
CREB3L2 GOLGA4  
CREB3L2 GOLGA5  
CREB3L2 GOLGB1  
CREB3L2 GOLPH3L  
CREB3L2 GOPC  
CREB3L2 GORASP2  
CREB3L2 GOSR2  
CREB3L2 GPANK1  
CREB3L2 GPLD1

CREB3L2 GPR108  
CREB3L2 GPR137B  
CREB3L2 GPR146  
CREB3L2 GPR160  
CREB3L2 GPR65  
CREB3L2 GPX7  
CREB3L2 GRN  
CREB3L2 GUK1  
CREB3L2 GUSB  
CREB3L2 H1FX  
CREB3L2 HAUS5  
CREB3L2 HBS1L  
CREB3L2 HCST  
CREB3L2 HDLBP  
CREB3L2 HERPUD1  
CREB3L2 HEXA  
CREB3L2 HID1  
CREB3L2 HIST1H1C  
CREB3L2 HIST1H2BJ  
CREB3L2 HIST1H2BN  
CREB3L2 HIST3H2A  
CREB3L2 HLA-B  
CREB3L2 HLA-DRB5  
CREB3L2 HLA-E  
CREB3L2 HM13  
CREB3L2 HMG20A  
CREB3L2 HMGXB3  
CREB3L2 HPCAL1  
CREB3L2 HSD17B10  
CREB3L2 HSP90B1  
CREB3L2 HSPA5  
CREB3L2 ICAM2  
CREB3L2 ICAM3  
CREB3L2 IDH3G  
CREB3L2 IER3IP1  
CREB3L2 IFI27L2  
CREB3L2 IFNAR1  
CREB3L2 IFNAR2  
CREB3L2 IFNG-AS1  
CREB3L2 IFRD1  
CREB3L2 IFT27  
CREB3L2 IFT81  
CREB3L2 IGF2R  
CREB3L2 IGSF8  
CREB3L2 IKBIP  
CREB3L2 IL10RA  
CREB3L2 IL16  
CREB3L2 IL6R  
CREB3L2 INPP4A  
CREB3L2 INSIG1



CREB3L2 INSIG2  
CREB3L2 IQGAP2  
CREB3L2 IRAK1  
CREB3L2 IRF1  
CREB3L2 IRF2  
CREB3L2 IRF4  
CREB3L2 IRF7  
CREB3L2 IRF9  
CREB3L2 ISCU  
CREB3L2 ISG20  
CREB3L2 ISOC2  
CREB3L2 ITGB1  
CREB3L2 ITM2B  
CREB3L2 ITM2C  
CREB3L2 JCHAIN  
CREB3L2 JMJD6  
CREB3L2 KCNK6  
CREB3L2 KCNN3  
CREB3L2 KDEL1  
CREB3L2 KDEL2  
CREB3L2 KDEL3  
CREB3L2 KIAA0930  
CREB3L2 KIAA2013  
CREB3L2 KIF13B  
CREB3L2 KLF13  
CREB3L2 KLHDC10  
CREB3L2 KLHL9  
CREB3L2 KMT2E-AS1  
CREB3L2 KRTCAP2  
CREB3L2 LAMTOR4  
CREB3L2 LAP3  
CREB3L2 LAPTM4A  
CREB3L2 LARP1B  
CREB3L2 LAS1L  
CREB3L2 LAX1  
CREB3L2 LCMT1  
CREB3L2 LDLRAD4  
CREB3L2 LGMN  
CREB3L2 LMAN1  
CREB3L2 LMBRD1  
CREB3L2 LMF1  
CREB3L2 LMF2  
CREB3L2 LMTK3  
CREB3L2 LPIN1  
CREB3L2 LRP10  
CREB3L2 LRRC59  
CREB3L2 LSP1  
CREB3L2 LSR  
CREB3L2 LTBP3  
CREB3L2 LYSMD3

CREB3L2 LZTFL1  
CREB3L2 MACROD2  
CREB3L2 MAGED1  
CREB3L2 MAGT1  
CREB3L2 MAN1A1  
CREB3L2 MAN1A2  
CREB3L2 MANF  
CREB3L2 MAP1LC3A  
CREB3L2 MAP1LC3B  
CREB3L2 MAP3K14  
CREB3L2 MAPK6  
CREB3L2 MARCH5  
CREB3L2 MARCH6  
CREB3L2 MARCKS  
CREB3L2 MBTPS1  
CREB3L2 MCFD2  
CREB3L2 MCL1  
CREB3L2 MCUR1  
CREB3L2 MEF2C  
CREB3L2 MEI1  
CREB3L2 METTL15  
CREB3L2 MFF  
CREB3L2 MGAT1  
CREB3L2 MGST2  
CREB3L2 MIA2  
CREB3L2 MIEF1  
CREB3L2 MIR193BHG  
CREB3L2 MIR4435-2HG  
CREB3L2 MLEC  
CREB3L2 MOGS  
CREB3L2 MORF4L2  
CREB3L2 MPC1  
CREB3L2 MPG  
CREB3L2 MPHOSPH8  
CREB3L2 MPI  
CREB3L2 MPV17L2  
CREB3L2 MRPL40  
CREB3L2 MRPL52  
CREB3L2 MRPL54  
CREB3L2 MRPL55  
CREB3L2 MRPS14  
CREB3L2 MRPS18B  
CREB3L2 MT1X  
CREB3L2 MTDH  
CREB3L2 MTFP1  
CREB3L2 MTHFD2L  
CREB3L2 MXD4  
CREB3L2 MYCBP2  
CREB3L2 MYDGF  
CREB3L2 MYH10

CREB3L2 MYL6  
CREB3L2 MZB1  
CREB3L2 N4BP2L2  
CREB3L2 NAGK  
CREB3L2 NANS  
CREB3L2 NAPA  
CREB3L2 NBAS  
CREB3L2 NCK2  
CREB3L2 NCSTN  
CREB3L2 NDFIP1  
CREB3L2 NDUFA1  
CREB3L2 NDUFA11  
CREB3L2 NDUFA13  
CREB3L2 NDUFA4  
CREB3L2 NDUFAB1  
CREB3L2 NDUFAF3  
CREB3L2 NDUFB4  
CREB3L2 NDUFB6  
CREB3L2 NDUFC2  
CREB3L2 NDUFS6  
CREB3L2 NDUFV1  
CREB3L2 NDUFV3  
CREB3L2 NEAT1  
CREB3L2 NEDD9  
CREB3L2 NEK8  
CREB3L2 NELFE  
CREB3L2 NET1  
CREB3L2 NEU1  
CREB3L2 NFATC3  
CREB3L2 NGLY1  
CREB3L2 NIPA2  
CREB3L2 NKIRAS2  
CREB3L2 NMRK1  
CREB3L2 NNT-AS1  
CREB3L2 NPC2  
CREB3L2 NRBF2  
CREB3L2 NRBP1  
CREB3L2 NRDC  
CREB3L2 NRIP1  
CREB3L2 NSMCE3  
CREB3L2 NSUN4  
CREB3L2 NT5DC2  
CREB3L2 NUCB2  
CREB3L2 NUS1  
CREB3L2 OAF  
CREB3L2 OAS2  
CREB3L2 ODF3B  
CREB3L2 OGFOD2  
CREB3L2 ORMDL1  
CREB3L2 ORMDL3

CREB3L2 OS9  
CREB3L2 OSBP  
CREB3L2 OSTC  
CREB3L2 OSTM1  
CREB3L2 OTUD5  
CREB3L2 OXA1L  
CREB3L2 P2RX1  
CREB3L2 P4HA1  
CREB3L2 P4HB  
CREB3L2 PACSIN2  
CREB3L2 PANK3  
CREB3L2 PAPSS1  
CREB3L2 PARP4  
CREB3L2 PBXIP1  
CREB3L2 PCBP1  
CREB3L2 PCGF3  
CREB3L2 PDE4B  
CREB3L2 PDE4DIP  
CREB3L2 PDIA4  
CREB3L2 PDIA5  
CREB3L2 PDIA6  
CREB3L2 PDK1  
CREB3L2 PDXDC1  
CREB3L2 PDXK  
CREB3L2 PECAM1  
CREB3L2 PET100  
CREB3L2 PEX2  
CREB3L2 PEX6  
CREB3L2 PGM3  
CREB3L2 PGRMC2  
CREB3L2 PHACTR1  
CREB3L2 PHC3  
CREB3L2 PHF1  
CREB3L2 PHPT1  
CREB3L2 PHTF1  
CREB3L2 PIEZ01  
CREB3L2 PIM2  
CREB3L2 PINK1  
CREB3L2 PITRM1  
CREB3L2 PJA2  
CREB3L2 PLCL2  
CREB3L2 PLD3  
CREB3L2 PLD4  
CREB3L2 PLPP5  
CREB3L2 PMEPA1  
CREB3L2 PMM2  
CREB3L2 PNOC  
CREB3L2 POP5  
CREB3L2 POP7  
CREB3L2 POU2F1

CREB3L2 PPIB  
CREB3L2 PPP2R5B  
CREB3L2 PPP6R3  
CREB3L2 PRCP  
CREB3L2 PRDX4  
CREB3L2 PREB  
CREB3L2 PRKAR2B  
CREB3L2 PRKCSH  
CREB3L2 PRKD2  
CREB3L2 PRKD3  
CREB3L2 PRMT5  
CREB3L2 PRRC2B  
CREB3L2 PSEN2  
CREB3L2 PSMA6  
CREB3L2 PSMB8-AS1  
CREB3L2 PSMC4  
CREB3L2 PSMD2  
CREB3L2 PSMD7  
CREB3L2 PSMF1  
CREB3L2 PTPN1  
CREB3L2 PUS3  
CREB3L2 PUS7L  
CREB3L2 PWWP2A  
CREB3L2 QPCT  
CREB3L2 QPRT  
CREB3L2 QSOX1  
CREB3L2 RAB11B  
CREB3L2 RAB1A  
CREB3L2 RAB2A  
CREB3L2 RAB2B  
CREB3L2 RAB30  
CREB3L2 RAB6A  
CREB3L2 RABAC1  
CREB3L2 RABGGTA  
CREB3L2 RAP1A  
CREB3L2 RAPGEF6  
CREB3L2 RARA  
CREB3L2 RARS2  
CREB3L2 RASSF5  
CREB3L2 RB1  
CREB3L2 RBBP6  
CREB3L2 RBM33  
CREB3L2 REEP5  
CREB3L2 REX02  
CREB3L2 RGS1  
CREB3L2 RGS16  
CREB3L2 RGS2  
CREB3L2 RHOT1  
CREB3L2 RNASE4  
CREB3L2 RNF103

CREB3L2 RNF141  
CREB3L2 RNF149  
CREB3L2 RNF181  
CREB3L2 RNH1  
CREB3L2 RPL10  
CREB3L2 RPL13  
CREB3L2 RPL3  
CREB3L2 RPL36AL  
CREB3L2 RPLP0  
CREB3L2 RPLP1  
CREB3L2 RPN1  
CREB3L2 RPN2  
CREB3L2 RPS11  
CREB3L2 RPS19  
CREB3L2 RPS28  
CREB3L2 RPS29  
CREB3L2 RPS4X  
CREB3L2 RPS6KB2  
CREB3L2 RPS9  
CREB3L2 RRBP1  
CREB3L2 RREB1  
CREB3L2 RSBN1  
CREB3L2 RSRP1  
CREB3L2 RTN3  
CREB3L2 RUNX1  
CREB3L2 RXRA  
CREB3L2 RYBP  
CREB3L2 SAR1A  
CREB3L2 SAR1B  
CREB3L2 SARAF  
CREB3L2 SAT1  
CREB3L2 SCAMP2  
CREB3L2 SCAMP3  
CREB3L2 SCAND1  
CREB3L2 SCAPER  
CREB3L2 SCFD1  
CREB3L2 SCPEP1  
CREB3L2 SCYL1  
CREB3L2 SDC1  
CREB3L2 SDF2L1  
CREB3L2 SDF4  
CREB3L2 SDHC  
CREB3L2 SEC11C  
CREB3L2 SEC13  
CREB3L2 SEC22B  
CREB3L2 SEC23IP  
CREB3L2 SEC24A  
CREB3L2 SEC24D  
CREB3L2 SEC31A  
CREB3L2 SEC61A1

CREB3L2 SEC61B  
CREB3L2 SEC61G  
CREB3L2 SEC62  
CREB3L2 SEC63  
CREB3L2 SECISBP2L  
CREB3L2 SEL1L  
CREB3L2 SEL1L3  
CREB3L2 SERP1  
CREB3L2 SERTAD3  
CREB3L2 SET  
CREB3L2 SETD7  
CREB3L2 SF3B5  
CREB3L2 SGK3  
CREB3L2 SGPP1  
CREB3L2 SIL1  
CREB3L2 SIRT2  
CREB3L2 SKIL  
CREB3L2 SLC17A5  
CREB3L2 SLC17A9  
CREB3L2 SLC1A4  
CREB3L2 SLC25A39  
CREB3L2 SLC25A45  
CREB3L2 SLC25A46  
CREB3L2 SLC30A7  
CREB3L2 SLC31A2  
CREB3L2 SLC33A1  
CREB3L2 SLC35A3  
CREB3L2 SLC35B1  
CREB3L2 SLC35C1  
CREB3L2 SLC38A10  
CREB3L2 SLC38A2  
CREB3L2 SLC39A7  
CREB3L2 SLC39A9  
CREB3L2 SLC44A1  
CREB3L2 SLC04A1  
CREB3L2 SLFN11  
CREB3L2 SMAD4  
CREB3L2 SMAD5  
CREB3L2 SMAP1  
CREB3L2 SMCHD1  
CREB3L2 SMIM4  
CREB3L2 SMPD1  
CREB3L2 SMTN  
CREB3L2 SMYD3  
CREB3L2 SNAPC2  
CREB3L2 SND1  
CREB3L2 SNRPN  
CREB3L2 SNURF  
CREB3L2 SNX16  
CREB3L2 SOCS3

CREB3L2 SPAG4  
CREB3L2 SPATS2  
CREB3L2 SPATS2L  
CREB3L2 SPC24  
CREB3L2 SPCS1  
CREB3L2 SPINT2  
CREB3L2 SPON2  
CREB3L2 SPRYD3  
CREB3L2 SPTBN1  
CREB3L2 SPTSSA  
CREB3L2 SPTY2D1  
CREB3L2 SQSTM1  
CREB3L2 SRGN  
CREB3L2 SRM  
CREB3L2 SRP14  
CREB3L2 SRP19  
CREB3L2 SRP54  
CREB3L2 SRP68  
CREB3L2 SRP72  
CREB3L2 SRPRA  
CREB3L2 SRRM2  
CREB3L2 SSR1  
CREB3L2 SSR3  
CREB3L2 SSR4  
CREB3L2 SSSCA1  
CREB3L2 ST6GAL1  
CREB3L2 ST6GALNAC4  
CREB3L2 ST7  
CREB3L2 STARD5  
CREB3L2 STK17B  
CREB3L2 STRN4  
CREB3L2 STS  
CREB3L2 STT3A  
CREB3L2 STT3B  
CREB3L2 STUB1  
CREB3L2 STX17  
CREB3L2 STX5  
CREB3L2 SUB1  
CREB3L2 SUC0  
CREB3L2 SU0X  
CREB3L2 SUPT5H  
CREB3L2 SUPT7L  
CREB3L2 SURF4  
CREB3L2 SYNC  
CREB3L2 SYNGR1  
CREB3L2 SYNRG  
CREB3L2 SYTL1  
CREB3L2 SYVN1  
CREB3L2 TARSL2  
CREB3L2 TBC1D7



CREB3L2 TBL2  
CREB3L2 TCEAL3  
CREB3L2 TCEAL8  
CREB3L2 TCEAL9  
CREB3L2 TCF25  
CREB3L2 TCF4  
CREB3L2 TECPR1  
CREB3L2 TFG  
CREB3L2 THEMIS2  
CREB3L2 TIMM17A  
CREB3L2 TIMP1  
CREB3L2 TJAP1  
CREB3L2 TLE1  
CREB3L2 TM7SF2  
CREB3L2 TM9SF2  
CREB3L2 TM9SF3  
CREB3L2 TM9SF4  
CREB3L2 TMBIM6  
CREB3L2 TMED10  
CREB3L2 TMED2  
CREB3L2 TMED3  
CREB3L2 TMED4  
CREB3L2 TMED7  
CREB3L2 TMED9  
CREB3L2 TMEM101  
CREB3L2 TMEM134  
CREB3L2 TMEM165  
CREB3L2 TMEM167A  
CREB3L2 TMEM175  
CREB3L2 TMEM179B  
CREB3L2 TMEM184B  
CREB3L2 TMEM214  
CREB3L2 TMEM230  
CREB3L2 TMEM258  
CREB3L2 TMEM263  
CREB3L2 TMEM39A  
CREB3L2 TMEM45A  
CREB3L2 TMEM59  
CREB3L2 TMEM9  
CREB3L2 TMF1  
CREB3L2 TMSB10  
CREB3L2 TNFRSF17  
CREB3L2 TOR3A  
CREB3L2 TOX2  
CREB3L2 TPP1  
CREB3L2 TPT1  
CREB3L2 TRA2A  
CREB3L2 TRAM1  
CREB3L2 TRAPPC3  
CREB3L2 TRIB1

CREB3L2 TRIM27  
CREB3L2 TRIP11  
CREB3L2 TRNT1  
CREB3L2 TRPM4  
CREB3L2 TRPV3  
CREB3L2 TSC22D3  
CREB3L2 TSPAN13  
CREB3L2 TSPYL1  
CREB3L2 TSPYL2  
CREB3L2 TTC3  
CREB3L2 TUBG1  
CREB3L2 TUSC2  
CREB3L2 TVP23B  
CREB3L2 TXLNA  
CREB3L2 TXNDC11  
CREB3L2 TXNDC15  
CREB3L2 TXNDC5  
CREB3L2 TXNL1  
CREB3L2 TYMP  
CREB3L2 U2AF1L4  
CREB3L2 UAP1  
CREB3L2 UBA5  
CREB3L2 UBALD1  
CREB3L2 UBB  
CREB3L2 UBE2D4  
CREB3L2 UBE2J1  
CREB3L2 UBE2Q1  
CREB3L2 UBR5  
CREB3L2 UBXN4  
CREB3L2 UBXN6  
CREB3L2 UFL1  
CREB3L2 UFM1  
CREB3L2 UFSP2  
CREB3L2 UNC50  
CREB3L2 UQCR11  
CREB3L2 UQCRFS1  
CREB3L2 UROS  
CREB3L2 US01  
CREB3L2 USP48  
CREB3L2 USP7  
CREB3L2 USP8  
CREB3L2 UTP15  
CREB3L2 UTRN  
CREB3L2 VAMP2  
CREB3L2 VCP  
CREB3L2 VDR  
CREB3L2 VKORC1  
CREB3L2 VMA21  
CREB3L2 VOPP1  
CREB3L2 VPS11

CREB3L2 VPS25  
CREB3L2 VPS51  
CREB3L2 WNT6  
CREB3L2 WWC3  
CREB3L2 XBP1  
CREB3L2 XIAP  
CREB3L2 XRR1  
CREB3L2 YIF1A  
CREB3L2 YIF1B  
CREB3L2 YIPF2  
CREB3L2 YIPF3  
CREB3L2 YIPF5  
CREB3L2 YIPF6  
CREB3L2 YKT6  
CREB3L2 YPEL3  
CREB3L2 YPEL5  
CREB3L2 YTHDF1  
CREB3L2 ZBP1  
CREB3L2 ZBTB7B  
CREB3L2 ZC3H4  
CREB3L2 ZFAND2A  
CREB3L2 ZKSCAN1  
CREB3L2 ZNF12  
CREB3L2 ZNF215  
CREB3L2 ZNF275  
CREB3L2 ZNF280D  
CREB3L2 ZNF3  
CREB3L2 ZNF318  
CREB3L2 ZNF331  
CREB3L2 ZNF358  
CREB3L2 ZNF37A  
CREB3L2 ZNF529-AS1  
CREB3L2 ZNF706  
CREB3L2 ZNF791  
CREB3L2 ZNF793  
CREB3L2 ZSCAN18  
CREB3L4 CADPS  
CREB3L4 FKBP14  
CREB3L4 KLF9  
CREB3L4 LSM12  
CREB3L4 MAPRE2  
CREB3L4 MARCH9  
CREB3L4 MBNL2  
CREB3L4 NEK1  
CREB3L4 RCBTB1  
CREB3L4 RNF24  
CREB3L4 SEC31A  
CREB3L4 TMEM214  
CREB5 ABLIM1  
CREB5 ACOX3

|       |          |
|-------|----------|
| CREB5 | APP      |
| CREB5 | ARL8B    |
| CREB5 | ARRB2    |
| CREB5 | ASNS     |
| CREB5 | CCL4     |
| CREB5 | CCL4L2   |
| CREB5 | CD200    |
| CREB5 | CMSS1    |
| CREB5 | COA7     |
| CREB5 | CREB5    |
| CREB5 | CSTF1    |
| CREB5 | DDX6     |
| CREB5 | DEPDC5   |
| CREB5 | EDC3     |
| CREB5 | EIF3J    |
| CREB5 | FAM184A  |
| CREB5 | FGFR1    |
| CREB5 | GARS     |
| CREB5 | GPR65    |
| CREB5 | HRK      |
| CREB5 | HSPA9    |
| CREB5 | ICE1     |
| CREB5 | ID3      |
| CREB5 | IL10     |
| CREB5 | LARS     |
| CREB5 | MAGOHB   |
| CREB5 | MAP3K7CL |
| CREB5 | MCM10    |
| CREB5 | METTL1   |
| CREB5 | MYD88    |
| CREB5 | NAMPT    |
| CREB5 | NEDD4L   |
| CREB5 | OXSRI    |
| CREB5 | PAP0LG   |
| CREB5 | PCK2     |
| CREB5 | PCNX4    |
| CREB5 | PFDN2    |
| CREB5 | PMAIP1   |
| CREB5 | POGZ     |
| CREB5 | PRKACB   |
| CREB5 | PYCR1    |
| CREB5 | RAB3GAP2 |
| CREB5 | RBM15B   |
| CREB5 | RECQL4   |
| CREB5 | REL      |
| CREB5 | RNF145   |
| CREB5 | RNF19A   |
| CREB5 | RRP1B    |
| CREB5 | RSL24D1  |
| CREB5 | SAMSN1   |

|        |         |
|--------|---------|
| CREB5  | SH3BP2  |
| CREB5  | SLC3A2  |
| CREB5  | SLC43A3 |
| CREB5  | SLC4A7  |
| CREB5  | STX4    |
| CREB5  | TBC1D5  |
| CREB5  | TIPARP  |
| CREB5  | TM9SF4  |
| CREB5  | TRAF1   |
| CREB5  | TRAP1   |
| CREB5  | TRIP6   |
| CREB5  | TUBE1   |
| CREB5  | UBE2B   |
| CREB5  | UTP18   |
| CREB5  | WDR33   |
| CREB5  | WDR74   |
| CREB5  | XP01    |
| CREB5  | ZFR     |
| CREB5  | ZNF330  |
| CREBZF | KDM6A   |
| CREBZF | PNPLA6  |
| CREBZF | ZNF784  |
| CREM   | AARS    |
| CREM   | ABRACL  |
| CREM   | ABT1    |
| CREM   | ACAD9   |
| CREM   | ACADVL  |
| CREM   | ACAP1   |
| CREM   | ACIN1   |
| CREM   | AC02    |
| CREM   | AC0X1   |
| CREM   | ACTG1   |
| CREM   | ADARB1  |
| CREM   | ADIPOR1 |
| CREM   | ADNP    |
| CREM   | AIMP1   |
| CREM   | AKAP9   |
| CREM   | ALCAM   |
| CREM   | ALKBH3  |
| CREM   | ANAPC16 |
| CREM   | ANKRD11 |
| CREM   | ANP32B  |
| CREM   | ANXA6   |
| CREM   | ANXA7   |
| CREM   | AP2B1   |
| CREM   | AP2M1   |
| CREM   | AP5M1   |
| CREM   | APOC1   |
| CREM   | APOM    |
| CREM   | ARF1    |

|      |          |
|------|----------|
| CREM | ARF4     |
| CREM | ARF5     |
| CREM | ARF6     |
| CREM | ARHGAP12 |
| CREM | ARHGEF2  |
| CREM | ARID5B   |
| CREM | ARL1     |
| CREM | ARL17A   |
| CREM | ARMCX3   |
| CREM | ARMCX6   |
| CREM | ARMT1    |
| CREM | ATF4     |
| CREM | ATG3     |
| CREM | ATG5     |
| CREM | ATP6AP2  |
| CREM | ATP6V0D1 |
| CREM | AVPI1    |
| CREM | B3GAT3   |
| CREM | BASP1    |
| CREM | BBIP1    |
| CREM | BCAR3    |
| CREM | BCAS2    |
| CREM | BIRC2    |
| CREM | BRMS1    |
| CREM | BSDC1    |
| CREM | BTF3L4   |
| CREM | BTG1     |
| CREM | BUD31    |
| CREM | C11orf49 |
| CREM | C19orf24 |
| CREM | C1D      |
| CREM | C1orf123 |
| CREM | C1orf174 |
| CREM | C1orf43  |
| CREM | C7orf50  |
| CREM | CALCOC02 |
| CREM | CAMK1    |
| CREM | CAMK2B   |
| CREM | CAMKK2   |
| CREM | CAP1     |
| CREM | CAPZA2   |
| CREM | CCDC107  |
| CREM | CCDC25   |
| CREM | CCDC92   |
| CREM | CCSER2   |
| CREM | CD164    |
| CREM | CD2BP2   |
| CREM | CD53     |
| CREM | CD83     |
| CREM | CD86     |

|      |         |
|------|---------|
| CREM | CDC37   |
| CREM | CDC42   |
| CREM | CDC5L   |
| CREM | CDIPT   |
| CREM | CEBPB   |
| CREM | CEBPG   |
| CREM | CENPM   |
| CREM | CEP295  |
| CREM | CEP57   |
| CREM | CFL1    |
| CREM | CHCHD2  |
| CREM | CHD1    |
| CREM | CHD4    |
| CREM | CHD7    |
| CREM | CHMP2A  |
| CREM | CIRBP   |
| CREM | CLK1    |
| CREM | CLK2    |
| CREM | CMC2    |
| CREM | CMIP    |
| CREM | CNDP2   |
| CREM | CNOT4   |
| CREM | COMMD1  |
| CREM | COMMD3  |
| CREM | COMMD8  |
| CREM | COPB2   |
| CREM | COPE    |
| CREM | COX18   |
| CREM | COX6A1  |
| CREM | COX8A   |
| CREM | CREM    |
| CREM | CSDE1   |
| CREM | CSK     |
| CREM | CSNK1A1 |
| CREM | CTSH    |
| CREM | CYLD    |
| CREM | CYTH1   |
| CREM | DAD1    |
| CREM | DAP     |
| CREM | DAPP1   |
| CREM | DAZAP2  |
| CREM | DCAF11  |
| CREM | DCXR    |
| CREM | DDIT3   |
| CREM | DDIT4   |
| CREM | DDX10   |
| CREM | DDX24   |
| CREM | DDX42   |
| CREM | DDX5    |
| CREM | DENND1B |

|      |         |
|------|---------|
| CREM | DGAT2   |
| CREM | DGUOK   |
| CREM | DHDDS   |
| CREM | DHX36   |
| CREM | DIAPH3  |
| CREM | DNAJA2  |
| CREM | DNAJC10 |
| CREM | DNAJC25 |
| CREM | DOHH    |
| CREM | DPH6    |
| CREM | DPM1    |
| CREM | DSP     |
| CREM | DTNBP1  |
| CREM | DTX3    |
| CREM | DUSP10  |
| CREM | DUSP2   |
| CREM | DUSP3   |
| CREM | DYNLT3  |
| CREM | E2F3    |
| CREM | EBF1    |
| CREM | EEF1A1  |
| CREM | EIF1    |
| CREM | EIF2B1  |
| CREM | EIF3B   |
| CREM | EIF4A2  |
| CREM | EIF4G2  |
| CREM | ELAVL1  |
| CREM | ELL     |
| CREM | EMC4    |
| CREM | EMC8    |
| CREM | ENSA    |
| CREM | EPN1    |
| CREM | ERP44   |
| CREM | EZH1    |
| CREM | FAAP20  |
| CREM | FAF1    |
| CREM | FAM107B |
| CREM | FAM3C   |
| CREM | FAM49A  |
| CREM | FAM81A  |
| CREM | FAU     |
| CREM | FBX08   |
| CREM | FDFT1   |
| CREM | FEN1    |
| CREM | FEZ1    |
| CREM | FIS1    |
| CREM | FMR1    |
| CREM | FOXN3   |
| CREM | FPGS    |
| CREM | FTH1    |



|      |           |
|------|-----------|
| CREM | FXYD5     |
| CREM | FYN       |
| CREM | FYTTD1    |
| CREM | G3BP2     |
| CREM | GABARAPL2 |
| CREM | GADD45B   |
| CREM | GALK2     |
| CREM | GALNT2    |
| CREM | GEM       |
| CREM | GGA1      |
| CREM | GHITM     |
| CREM | GK        |
| CREM | GLA       |
| CREM | GLYR1     |
| CREM | GMDS      |
| CREM | GNAS      |
| CREM | GNG4      |
| CREM | GNL1      |
| CREM | GOT2      |
| CREM | GPATCH8   |
| CREM | GPBP1     |
| CREM | GPOR1     |
| CREM | GPR146    |
| CREM | GPR183    |
| CREM | GPR65     |
| CREM | GRB2      |
| CREM | GRPEL1    |
| CREM | GTF2F1    |
| CREM | GUK1      |
| CREM | H3F3A     |
| CREM | H3F3B     |
| CREM | HAT1      |
| CREM | HCCS      |
| CREM | HCFC1     |
| CREM | HECW2     |
| CREM | HERPUD1   |
| CREM | HEXIM1    |
| CREM | HIVEP3    |
| CREM | HLA-DQB1  |
| CREM | HLA-DRA   |
| CREM | HLA-DRB1  |
| CREM | HMCE5     |
| CREM | HNRNPA3   |
| CREM | HNRNPK    |
| CREM | HOPX      |
| CREM | HPS4      |
| CREM | HSF2      |
| CREM | HSPA4     |
| CREM | HSPBAP1   |
| CREM | HTATSF1   |

|      |           |
|------|-----------|
| CREM | HTR3A     |
| CREM | ICE1      |
| CREM | IDH2      |
| CREM | IFI27L2   |
| CREM | IFT74     |
| CREM | IL10RA    |
| CREM | IL21R     |
| CREM | IMPDH2    |
| CREM | INF2      |
| CREM | INIP      |
| CREM | INSIG1    |
| CREM | IQGAP2    |
| CREM | IQSEC1    |
| CREM | ISG15     |
| CREM | ISOC2     |
| CREM | ITGB2     |
| CREM | KAT5      |
| CREM | KAT7      |
| CREM | KCNK12    |
| CREM | KCNN4     |
| CREM | KDM6B     |
| CREM | KMT2E     |
| CREM | KYAT3     |
| CREM | LAP3      |
| CREM | LAPTM4A   |
| CREM | LAPTM5    |
| CREM | LCP1      |
| CREM | LDHA      |
| CREM | LDLRAD4   |
| CREM | LGALS8    |
| CREM | LIMS1     |
| CREM | LINC00909 |
| CREM | LMBR1     |
| CREM | LMF2      |
| CREM | LMO2      |
| CREM | LMTK2     |
| CREM | LPIN1     |
| CREM | LRRC23    |
| CREM | LRRC8A    |
| CREM | LRRC8B    |
| CREM | LYSMD2    |
| CREM | LYST      |
| CREM | MAG0HB    |
| CREM | MAP2K3    |
| CREM | MAP3K8    |
| CREM | MAPK1IP1L |
| CREM | MARCH1    |
| CREM | MARCH7    |
| CREM | MARCKSL1  |
| CREM | MBTPS1    |

|      |           |
|------|-----------|
| CREM | MCRIP1    |
| CREM | MED27     |
| CREM | MEF2C     |
| CREM | MET       |
| CREM | MGLL      |
| CREM | MGMT      |
| CREM | MGRN1     |
| CREM | MICU1     |
| CREM | MIF       |
| CREM | MIR193BHG |
| CREM | MKNK2     |
| CREM | MLF2      |
| CREM | MLX       |
| CREM | MMAB      |
| CREM | MMADHC    |
| CREM | MPC1      |
| CREM | MRPL23    |
| CREM | MRPL4     |
| CREM | MRPS18B   |
| CREM | MS4A1     |
| CREM | MTCH1     |
| CREM | MTSS1     |
| CREM | MYL6      |
| CREM | MYO1G     |
| CREM | NAB1      |
| CREM | NABP1     |
| CREM | NANS      |
| CREM | NAPA      |
| CREM | NARS2     |
| CREM | NBN       |
| CREM | NCOA2     |
| CREM | NDUFA7    |
| CREM | NDUFB2    |
| CREM | NDUFB6    |
| CREM | NDUFS2    |
| CREM | NDUFV1    |
| CREM | NEAT1     |
| CREM | NEK7      |
| CREM | NFE2L2    |
| CREM | NFKB1     |
| CREM | NFKB2     |
| CREM | NIN       |
| CREM | NIPA2     |
| CREM | NOC4L     |
| CREM | NOP58     |
| CREM | NOTCH2    |
| CREM | NPAT      |
| CREM | NPL0C4    |
| CREM | NR3C1     |
| CREM | NSMCE3    |

|      |          |
|------|----------|
| CREM | NSRP1    |
| CREM | NTHL1    |
| CREM | NUP133   |
| CREM | NUP62    |
| CREM | NUP93    |
| CREM | NXT2     |
| CREM | OCIAD1   |
| CREM | ORAI1    |
| CREM | ORC4     |
| CREM | ORC5     |
| CREM | OSBP     |
| CREM | OSBPL9   |
| CREM | OXCT2    |
| CREM | PABPC1   |
| CREM | PAK1     |
| CREM | PAN2     |
| CREM | PARK7    |
| CREM | PCIF1    |
| CREM | PDAP1    |
| CREM | PDHA1    |
| CREM | PDK3     |
| CREM | PDXDC1   |
| CREM | PDXK     |
| CREM | PEA15    |
| CREM | PEF1     |
| CREM | PFDN1    |
| CREM | PFKFB3   |
| CREM | PFN1     |
| CREM | PHACTR1  |
| CREM | PHF5A    |
| CREM | PIP4K2A  |
| CREM | PITPNA   |
| CREM | PKM      |
| CREM | PKN2     |
| CREM | PLCL2    |
| CREM | PMVK     |
| CREM | PNRC1    |
| CREM | POLR2M   |
| CREM | POU2F2   |
| CREM | PPFIBP1  |
| CREM | PPM1F    |
| CREM | PPP1R15A |
| CREM | PPP1R3D  |
| CREM | PPP1R8   |
| CREM | PPP2R1A  |
| CREM | PPP2R2A  |
| CREM | PRDX6    |
| CREM | PRKAR1A  |
| CREM | PRKCD    |
| CREM | PRKCSH   |

|      |          |
|------|----------|
| CREM | PRKD2    |
| CREM | PRMT1    |
| CREM | PRPF38A  |
| CREM | PRPSAP2  |
| CREM | PRRC2C   |
| CREM | PRRG4    |
| CREM | PSMA3    |
| CREM | PSMB1    |
| CREM | PSMB2    |
| CREM | PSMB3    |
| CREM | PSMD14   |
| CREM | PTAFR    |
| CREM | PTBP2    |
| CREM | PTMA     |
| CREM | PTP4A1   |
| CREM | PTPN1    |
| CREM | PTPRN2   |
| CREM | PXK      |
| CREM | QRICH1   |
| CREM | RAB11B   |
| CREM | RAB14    |
| CREM | RAB18    |
| CREM | RAB21    |
| CREM | RAB3GAP2 |
| CREM | RAB8B    |
| CREM | RAB9A    |
| CREM | RABEP1   |
| CREM | RABL2B   |
| CREM | RAD23A   |
| CREM | RAD54B   |
| CREM | RALA     |
| CREM | RANBP2   |
| CREM | RANGAP1  |
| CREM | RAP1A    |
| CREM | RASSF5   |
| CREM | RBM3     |
| CREM | RBM39    |
| CREM | RBM42    |
| CREM | RCC1     |
| CREM | REEP3    |
| CREM | REL      |
| CREM | RELB     |
| CREM | RELT     |
| CREM | RFT1     |
| CREM | RFTN1    |
| CREM | RGS13    |
| CREM | RGS20    |
| CREM | RGS3     |
| CREM | RHBDD1   |
| CREM | RHEB     |

|      |            |
|------|------------|
| CREM | RHOG       |
| CREM | RNF145     |
| CREM | RNH1       |
| CREM | RPL13A     |
| CREM | RPL18      |
| CREM | RPL3       |
| CREM | RPL36AL    |
| CREM | RPL6       |
| CREM | RPLP1      |
| CREM | RPS19      |
| CREM | RPSA       |
| CREM | RRAS       |
| CREM | RUNX1      |
| CREM | SACM1L     |
| CREM | SAP30BP    |
| CREM | SARAF      |
| CREM | SCAMP1-AS1 |
| CREM | SCAMP2     |
| CREM | SCLT1      |
| CREM | SCRN1      |
| CREM | SDCBP      |
| CREM | SDCCAG8    |
| CREM | SDHAF2     |
| CREM | SDHC       |
| CREM | SEC23B     |
| CREM | SEC61B     |
| CREM | SEC61G     |
| CREM | SEC62      |
| CREM | SENP8      |
| CREM | SERINC1    |
| CREM | SERPINA9   |
| CREM | SERTAD3    |
| CREM | SESN3      |
| CREM | SETD7      |
| CREM | SF3B5      |
| CREM | SFT2D1     |
| CREM | SGF29      |
| CREM | SGSM3      |
| CREM | SH2B2      |
| CREM | SHMT2      |
| CREM | SIRT6      |
| CREM | SKAP1      |
| CREM | SKP1       |
| CREM | SLC1A4     |
| CREM | SLC25A3    |
| CREM | SLC25A39   |
| CREM | SLC37A4    |
| CREM | SLC38A9    |
| CREM | SLC04A1    |
| CREM | SMAP1      |

|      |         |
|------|---------|
| CREM | SMAP2   |
| CREM | SMC5    |
| CREM | SMCHD1  |
| CREM | SMKR1   |
| CREM | SMU1    |
| CREM | SNAPC5  |
| CREM | SND1    |
| CREM | SNF8    |
| CREM | SNHG15  |
| CREM | SNHG8   |
| CREM | SNRNP40 |
| CREM | SNRPG   |
| CREM | SNU13   |
| CREM | SNX11   |
| CREM | SNX8    |
| CREM | SPACA9  |
| CREM | SPG21   |
| CREM | SPICE1  |
| CREM | SPOP    |
| CREM | SPTLC1  |
| CREM | SPTSSA  |
| CREM | SRGN    |
| CREM | SRP54   |
| CREM | SRP68   |
| CREM | SRRD    |
| CREM | SRRM2   |
| CREM | SRSF2   |
| CREM | SRSF5   |
| CREM | SSNA1   |
| CREM | SSSCA1  |
| CREM | SSTR2   |
| CREM | SSU72   |
| CREM | ST6GAL1 |
| CREM | STAM    |
| CREM | STAT3   |
| CREM | STAT4   |
| CREM | STAT5B  |
| CREM | STK4    |
| CREM | STRAP   |
| CREM | STX11   |
| CREM | STX18   |
| CREM | SYBU    |
| CREM | SYNCRIP |
| CREM | SYNGR1  |
| CREM | SYS1    |
| CREM | TACC1   |
| CREM | TAP1    |
| CREM | TAPT1   |
| CREM | TBC1D9  |
| CREM | TBCC    |

|      |           |
|------|-----------|
| CREM | TCEAL4    |
| CREM | TCEAL8    |
| CREM | TCF25     |
| CREM | TCP11L2   |
| CREM | TEN1      |
| CREM | THAP9-AS1 |
| CREM | TIMM10B   |
| CREM | TIMM17A   |
| CREM | TJP1      |
| CREM | TMBIM1    |
| CREM | TMC6      |
| CREM | TMEM14A   |
| CREM | TMEM165   |
| CREM | TMEM179B  |
| CREM | TMEM219   |
| CREM | TMEM222   |
| CREM | TMEM259   |
| CREM | TMF1      |
| CREM | TMUB1     |
| CREM | TP53INP2  |
| CREM | TPD52L2   |
| CREM | TPM4      |
| CREM | TPT1      |
| CREM | TRA2B     |
| CREM | TRAF4     |
| CREM | TRMT1     |
| CREM | TRMT10C   |
| CREM | TSC22D3   |
| CREM | TSP0      |
| CREM | TSPYL2    |
| CREM | TTC3      |
| CREM | TUBB3     |
| CREM | TUBGCP2   |
| CREM | TUFM      |
| CREM | TWISTNB   |
| CREM | TXN2      |
| CREM | TYW1      |
| CREM | U2AF1L4   |
| CREM | UBALD1    |
| CREM | UBC       |
| CREM | UBE2B     |
| CREM | UBE2D2    |
| CREM | UBE2D3    |
| CREM | UBE2H     |
| CREM | UBN1      |
| CREM | UBQLN1    |
| CREM | UFL1      |
| CREM | UPF2      |
| CREM | UQCRC2    |
| CREM | UQCRQ     |



|      |         |
|------|---------|
| CREM | USP11   |
| CREM | USP8    |
| CREM | USP9X   |
| CREM | UTP23   |
| CREM | VAMP2   |
| CREM | VCP     |
| CREM | WDR1    |
| CREM | WDR33   |
| CREM | WDR91   |
| CREM | WSB1    |
| CREM | XRCC6   |
| CREM | XRN2    |
| CREM | YAE1D1  |
| CREM | YIPF1   |
| CREM | YKT6    |
| CREM | YY1     |
| CREM | ZBTB20  |
| CREM | ZBTB80S |
| CREM | ZC3H15  |
| CREM | ZDHHC3  |
| CREM | ZDHHC7  |
| CREM | ZEB1    |
| CREM | ZFAND2B |
| CREM | ZFHX3   |
| CREM | ZFP36L1 |
| CREM | ZNF143  |
| CREM | ZNF165  |
| CREM | ZNF195  |
| CREM | ZNF331  |
| CREM | ZNF394  |
| CREM | ZYX     |
| CTCF | AAK1    |
| CTCF | AAMP    |
| CTCF | AAR2    |
| CTCF | AATF    |
| CTCF | ABHD13  |
| CTCF | ABHD8   |
| CTCF | ABI3    |
| CTCF | ABL1    |
| CTCF | ABLIM2  |
| CTCF | ABRACL  |
| CTCF | ABT1    |
| CTCF | ACAT2   |
| CTCF | ACBD3   |
| CTCF | ACER3   |
| CTCF | ACIN1   |
| CTCF | ACLY    |
| CTCF | ACOT13  |
| CTCF | ACOT7   |
| CTCF | ACSL4   |

|      |          |
|------|----------|
| CTCF | ACTN4    |
| CTCF | ACTR1A   |
| CTCF | ACTR1B   |
| CTCF | ACTR2    |
| CTCF | ACTR6    |
| CTCF | ACYP1    |
| CTCF | ADD1     |
| CTCF | ADD3     |
| CTCF | ADH5     |
| CTCF | ADIPOR2  |
| CTCF | AEBP2    |
| CTCF | AFF3     |
| CTCF | AGBL5    |
| CTCF | AG02     |
| CTCF | AHCYL1   |
| CTCF | AHDC1    |
| CTCF | AIP      |
| CTCF | AKAP9    |
| CTCF | AKIP1    |
| CTCF | AKIRIN2  |
| CTCF | AKR1B1   |
| CTCF | AKR7A2   |
| CTCF | AKT2     |
| CTCF | ALAS1    |
| CTCF | ALDH16A1 |
| CTCF | ALDH4A1  |
| CTCF | ALG6     |
| CTCF | ALKBH3   |
| CTCF | ALKBH5   |
| CTCF | ALKBH6   |
| CTCF | ALMS1    |
| CTCF | ALOX5    |
| CTCF | ALOX5AP  |
| CTCF | ALYREF   |
| CTCF | AMZ2     |
| CTCF | ANAPC1   |
| CTCF | ANAPC10  |
| CTCF | ANAPC11  |
| CTCF | ANAPC15  |
| CTCF | ANAPC2   |
| CTCF | ANAPC4   |
| CTCF | ANAPC7   |
| CTCF | ANGEL2   |
| CTCF | ANKRD10  |
| CTCF | ANKRD13A |
| CTCF | ANKRD13D |
| CTCF | ANKRD26  |
| CTCF | ANKRD34B |
| CTCF | ANP32A   |
| CTCF | ANP32B   |

|      |            |
|------|------------|
| CTCF | ANP32E     |
| CTCF | ANXA2      |
| CTCF | AP1G1      |
| CTCF | AP1M1      |
| CTCF | AP2A1      |
| CTCF | AP2M1      |
| CTCF | AP2S1      |
| CTCF | AP3B1      |
| CTCF | AP3S1      |
| CTCF | AP5M1      |
| CTCF | APEH       |
| CTCF | APLP2      |
| CTCF | ARAF       |
| CTCF | ARAP1      |
| CTCF | ARF1       |
| CTCF | ARF6       |
| CTCF | ARFIP1     |
| CTCF | ARGLU1     |
| CTCF | ARHGAP11A  |
| CTCF | ARHGAP12   |
| CTCF | ARHGAP26   |
| CTCF | ARHGAP27   |
| CTCF | ARHGAP30   |
| CTCF | ARHGAP4    |
| CTCF | ARHGEF39   |
| CTCF | ARID1A     |
| CTCF | ARID1B     |
| CTCF | ARID2      |
| CTCF | ARID4B     |
| CTCF | ARL13B     |
| CTCF | ARL14EP    |
| CTCF | ARL16      |
| CTCF | ARMC1      |
| CTCF | ARPC2      |
| CTCF | ARPC3      |
| CTCF | ARPC5      |
| CTCF | ARPP19     |
| CTCF | ARRDC3-AS1 |
| CTCF | ASAP1      |
| CTCF | ASB1       |
| CTCF | ASB2       |
| CTCF | ASB8       |
| CTCF | ASCC2      |
| CTCF | ASF1A      |
| CTCF | ASF1B      |
| CTCF | ASNSD1     |
| CTCF | ASPSCR1    |
| CTCF | ASXL1      |
| CTCF | ASXL2      |
| CTCF | ATAD2      |

|      |          |
|------|----------|
| CTCF | ATAD5    |
| CTCF | ATF1     |
| CTCF | ATF6B    |
| CTCF | ATF7IP   |
| CTCF | ATG2A    |
| CTCF | ATG4B    |
| CTCF | ATG5     |
| CTCF | ATP10D   |
| CTCF | ATP23    |
| CTCF | ATP2A3   |
| CTCF | ATP6V1A  |
| CTCF | ATP6V1B2 |
| CTCF | ATP6V1C1 |
| CTCF | ATP6V1D  |
| CTCF | ATP6V1E1 |
| CTCF | ATP6V1H  |
| CTCF | ATP8A1   |
| CTCF | ATPAF2   |
| CTCF | ATRX     |
| CTCF | ATXN10   |
| CTCF | AURKA    |
| CTCF | AURKB    |
| CTCF | AZIN1    |
| CTCF | B9D2     |
| CTCF | BACH2    |
| CTCF | BAG6     |
| CTCF | BANF1    |
| CTCF | BAP1     |
| CTCF | BARD1    |
| CTCF | BAZ1A    |
| CTCF | BAZ1B    |
| CTCF | BAZ2A    |
| CTCF | BAZ2B    |
| CTCF | BBC3     |
| CTCF | BBIP1    |
| CTCF | BBS2     |
| CTCF | BBS4     |
| CTCF | BBS7     |
| CTCF | BBX      |
| CTCF | BCAS2    |
| CTCF | BCAS3    |
| CTCF | BCL10    |
| CTCF | BCL11A   |
| CTCF | BCL2L11  |
| CTCF | BCL3     |
| CTCF | BCL7A    |
| CTCF | BCL7B    |
| CTCF | BCLAF1   |
| CTCF | BDP1     |
| CTCF | BECN1    |

|      |          |
|------|----------|
| CTCF | BICD1    |
| CTCF | BIN3     |
| CTCF | BIRC2    |
| CTCF | BIRC6    |
| CTCF | BLCAP    |
| CTCF | BLMH     |
| CTCF | BL0C1S1  |
| CTCF | BMP2K    |
| CTCF | BNIP2    |
| CTCF | BNIP3L   |
| CTCF | BOD1L1   |
| CTCF | BORA     |
| CTCF | BORCS8   |
| CTCF | BPHL     |
| CTCF | BPTF     |
| CTCF | BRCA1    |
| CTCF | BRCA2    |
| CTCF | BRD3     |
| CTCF | BRD7     |
| CTCF | BRK1     |
| CTCF | BRMS1    |
| CTCF | BR0X     |
| CTCF | BRPF1    |
| CTCF | BRWD1    |
| CTCF | BTF3L4   |
| CTCF | BTG2     |
| CTCF | BUB3     |
| CTCF | BUD13    |
| CTCF | BZW1     |
| CTCF | BZW2     |
| CTCF | C11orf49 |
| CTCF | C11orf58 |
| CTCF | C11orf68 |
| CTCF | C12orf10 |
| CTCF | C12orf49 |
| CTCF | C12orf65 |
| CTCF | C12orf75 |
| CTCF | C17orf80 |
| CTCF | C18orf54 |
| CTCF | C19orf25 |
| CTCF | C19orf47 |
| CTCF | C1orf112 |
| CTCF | C1orf131 |
| CTCF | C1orf52  |
| CTCF | C21orf91 |
| CTCF | C2orf68  |
| CTCF | C3orf14  |
| CTCF | C3orf38  |
| CTCF | C4orf33  |
| CTCF | C5orf34  |

|      |          |
|------|----------|
| CTCF | C6orf136 |
| CTCF | C6orf48  |
| CTCF | C6orf62  |
| CTCF | C8orf76  |
| CTCF | C9orf78  |
| CTCF | CA5B     |
| CTCF | CAAP1    |
| CTCF | CACTIN   |
| CTCF | CACUL1   |
| CTCF | CACYBP   |
| CTCF | CADPS    |
| CTCF | CALM1    |
| CTCF | CALM2    |
| CTCF | CALM3    |
| CTCF | CAMK2D   |
| CTCF | CAMLG    |
| CTCF | CAMTA1   |
| CTCF | CAPNS1   |
| CTCF | CAPZA1   |
| CTCF | CAPZA2   |
| CTCF | CARD8    |
| CTCF | CARHSP1  |
| CTCF | CASC4    |
| CTCF | CASP2    |
| CTCF | CASP3    |
| CTCF | CASP8AP2 |
| CTCF | CBFB     |
| CTCF | CBR4     |
| CTCF | CBX1     |
| CTCF | CBX2     |
| CTCF | CBX3     |
| CTCF | CBX5     |
| CTCF | CC2D1A   |
| CTCF | CCAR1    |
| CTCF | CCDC102A |
| CTCF | CCDC12   |
| CTCF | CCDC14   |
| CTCF | CCDC167  |
| CTCF | CCDC174  |
| CTCF | CCDC186  |
| CTCF | CCDC43   |
| CTCF | CCDC82   |
| CTCF | CCDC88A  |
| CTCF | CCHCR1   |
| CTCF | CCM2     |
| CTCF | CCNB1    |
| CTCF | CCNB2    |
| CTCF | CCNDBP1  |
| CTCF | CCNF     |
| CTCF | CCNG2    |

|      |          |
|------|----------|
| CTCF | CCNH     |
| CTCF | CCNI     |
| CTCF | CCNK     |
| CTCF | CCNL1    |
| CTCF | CCNL2    |
| CTCF | CCP110   |
| CTCF | CCT7     |
| CTCF | CCZ1     |
| CTCF | CCZ1B    |
| CTCF | CD2AP    |
| CTCF | CD47     |
| CTCF | CD70     |
| CTCF | CDC16    |
| CTCF | CDC27    |
| CTCF | CDC37    |
| CTCF | CDC37L1  |
| CTCF | CDC40    |
| CTCF | CDC42    |
| CTCF | CDC42EP3 |
| CTCF | CDC42SE2 |
| CTCF | CDC73    |
| CTCF | CDCA2    |
| CTCF | CDCA3    |
| CTCF | CDCA5    |
| CTCF | CDCA8    |
| CTCF | CDK1     |
| CTCF | CDK11A   |
| CTCF | CDK11B   |
| CTCF | CDK13    |
| CTCF | CDK16    |
| CTCF | CDK19    |
| CTCF | CDK2AP2  |
| CTCF | CDK5RAP1 |
| CTCF | CDK5RAP2 |
| CTCF | CDK5RAP3 |
| CTCF | CDK9     |
| CTCF | CDKN1B   |
| CTCF | CDKN2A   |
| CTCF | CDKN2C   |
| CTCF | CDKN2D   |
| CTCF | CDKN3    |
| CTCF | CEBPG    |
| CTCF | CENPC    |
| CTCF | CENPF    |
| CTCF | CENPH    |
| CTCF | CENPJ    |
| CTCF | CENPL    |
| CTCF | CENPM    |
| CTCF | CENPP    |
| CTCF | CEP135   |

|      |         |
|------|---------|
| CTCF | CEP162  |
| CTCF | CEP350  |
| CTCF | CEP44   |
| CTCF | CEP55   |
| CTCF | CEP57L1 |
| CTCF | CEP63   |
| CTCF | CEP78   |
| CTCF | CEP89   |
| CTCF | CEP95   |
| CTCF | CEP97   |
| CTCF | CETN3   |
| CTCF | CFAP20  |
| CTCF | CFDP1   |
| CTCF | CFL1    |
| CTCF | CHAC2   |
| CTCF | CHAMP1  |
| CTCF | CHCHD5  |
| CTCF | CHD4    |
| CTCF | CHD9    |
| CTCF | CHERP   |
| CTCF | CHMP1A  |
| CTCF | CHMP2B  |
| CTCF | CHMP3   |
| CTCF | CHP1    |
| CTCF | CHST14  |
| CTCF | CHSY1   |
| CTCF | CHTF8   |
| CTCF | CHT0P   |
| CTCF | CHURC1  |
| CTCF | CIA01   |
| CTCF | CIR1    |
| CTCF | CIT     |
| CTCF | CKAP2   |
| CTCF | CKAP2L  |
| CTCF | CKLF    |
| CTCF | CKS2    |
| CTCF | CLIC1   |
| CTCF | CLIC4   |
| CTCF | CLK1    |
| CTCF | CLK2    |
| CTCF | CLK3    |
| CTCF | CLNS1A  |
| CTCF | CLPTM1  |
| CTCF | CLSTN1  |
| CTCF | CLTA    |
| CTCF | CLTC    |
| CTCF | CMSS1   |
| CTCF | CMTM6   |
| CTCF | CMTM7   |
| CTCF | CMTR1   |



|      |         |
|------|---------|
| CTCF | CNIH1   |
| CTCF | CNNM3   |
| CTCF | CNOT6L  |
| CTCF | CNOT8   |
| CTCF | CNPPD1  |
| CTCF | CNTR0B  |
| CTCF | COA6    |
| CTCF | COCH    |
| CTCF | COG4    |
| CTCF | COG7    |
| CTCF | COIL    |
| CTCF | COMMD10 |
| CTCF | COMMD2  |
| CTCF | COMMD4  |
| CTCF | COMMD6  |
| CTCF | COMMD8  |
| CTCF | COMTD1  |
| CTCF | COPA    |
| CTCF | COPB1   |
| CTCF | COPE    |
| CTCF | COPS6   |
| CTCF | COPS7A  |
| CTCF | COPS7B  |
| CTCF | COQ10B  |
| CTCF | COQ3    |
| CTCF | COQ4    |
| CTCF | COQ5    |
| CTCF | COR01A  |
| CTCF | COR01B  |
| CTCF | COR06   |
| CTCF | COX17   |
| CTCF | COX5B   |
| CTCF | COX6A1  |
| CTCF | COX7A2  |
| CTCF | COX7A2L |
| CTCF | COX8A   |
| CTCF | CPSF1   |
| CTCF | CPSF2   |
| CTCF | CPSF3   |
| CTCF | CPSF6   |
| CTCF | CPSF7   |
| CTCF | CPT2    |
| CTCF | CREB1   |
| CTCF | CREBL2  |
| CTCF | CRLF3   |
| CTCF | CRTAP   |
| CTCF | CRYZL1  |
| CTCF | CSE1L   |
| CTCF | CSNK1A1 |
| CTCF | CSNK1D  |

|      |         |
|------|---------|
| CTCF | CSNK1G2 |
| CTCF | CSTF1   |
| CTCF | CTCF    |
| CTCF | CTDNEP1 |
| CTCF | CTDP1   |
| CTCF | CTDSP1  |
| CTCF | CTDSP2  |
| CTCF | CTDSPL2 |
| CTCF | CTNNB1  |
| CTCF | CTNNBL1 |
| CTCF | CTSZ    |
| CTCF | CTU1    |
| CTCF | CUEDC2  |
| CTCF | CUL3    |
| CTCF | CWC22   |
| CTCF | CWC25   |
| CTCF | CWF19L2 |
| CTCF | CXCR4   |
| CTCF | CXXC5   |
| CTCF | CYB5B   |
| CTCF | CYB5D2  |
| CTCF | CYB5R3  |
| CTCF | CYSTM1  |
| CTCF | CYTH2   |
| CTCF | DAAM1   |
| CTCF | DARS    |
| CTCF | DAZAP1  |
| CTCF | DAZAP2  |
| CTCF | DBF4    |
| CTCF | DBNL    |
| CTCF | DCAF11  |
| CTCF | DCAF12  |
| CTCF | DCAF15  |
| CTCF | DCAF7   |
| CTCF | DCAKD   |
| CTCF | DCK     |
| CTCF | DCLRE1C |
| CTCF | DCP1B   |
| CTCF | DCP2    |
| CTCF | DCTN1   |
| CTCF | DCTN2   |
| CTCF | DCTN3   |
| CTCF | DCUN1D1 |
| CTCF | DDA1    |
| CTCF | DDB2    |
| CTCF | DDT     |
| CTCF | DDX19B  |
| CTCF | DDX27   |
| CTCF | DDX39A  |
| CTCF | DDX46   |

|      |         |
|------|---------|
| CTCF | DDX5    |
| CTCF | DDX59   |
| CTCF | DEK     |
| CTCF | DENND1B |
| CTCF | DENND2D |
| CTCF | DENND3  |
| CTCF | DENND4A |
| CTCF | DENND4B |
| CTCF | DESI2   |
| CTCF | DET1    |
| CTCF | DGCR8   |
| CTCF | DGKZ    |
| CTCF | DGU0K   |
| CTCF | DHFR    |
| CTCF | DHPS    |
| CTCF | DHRS7B  |
| CTCF | DHX36   |
| CTCF | DIAPH1  |
| CTCF | DLD     |
| CTCF | DLEU2   |
| CTCF | DLG1    |
| CTCF | DLST    |
| CTCF | DMAP1   |
| CTCF | DMD     |
| CTCF | DNAJA1  |
| CTCF | DNAJB1  |
| CTCF | DNAJC21 |
| CTCF | DNAJC7  |
| CTCF | DNAJC8  |
| CTCF | DNAJC9  |
| CTCF | DNM2    |
| CTCF | DNMT1   |
| CTCF | DNTTIP1 |
| CTCF | DOCK11  |
| CTCF | DOCK8   |
| CTCF | DONSON  |
| CTCF | DOT1L   |
| CTCF | DPAGT1  |
| CTCF | DPH7    |
| CTCF | DPM1    |
| CTCF | DPP9    |
| CTCF | DPY30   |
| CTCF | DR1     |
| CTCF | DRAM2   |
| CTCF | DRAP1   |
| CTCF | DTNBP1  |
| CTCF | DTX1    |
| CTCF | DTX2    |
| CTCF | DTYMK   |
| CTCF | DUSP23  |

|      |           |
|------|-----------|
| CTCF | DUSP6     |
| CTCF | DUT       |
| CTCF | DVL2      |
| CTCF | DYM       |
| CTCF | DYNC1I2   |
| CTCF | DYNC1LI1  |
| CTCF | DYNLL1    |
| CTCF | DYNLT3    |
| CTCF | DYRK2     |
| CTCF | E2F4      |
| CTCF | E2F8      |
| CTCF | EAPP      |
| CTCF | EBAG9     |
| CTCF | EBF1      |
| CTCF | EBP       |
| CTCF | ECEL1     |
| CTCF | ECSIT     |
| CTCF | ECT2      |
| CTCF | EDC3      |
| CTCF | EDF1      |
| CTCF | EEF1D     |
| CTCF | EFNA4     |
| CTCF | EGLN2     |
| CTCF | EHBP1     |
| CTCF | EID1      |
| CTCF | EID2      |
| CTCF | EIF1B     |
| CTCF | EIF2AK1   |
| CTCF | EIF2B1    |
| CTCF | EIF2S3    |
| CTCF | EIF3A     |
| CTCF | EIF3D     |
| CTCF | EIF3E     |
| CTCF | EIF3I     |
| CTCF | EIF3K     |
| CTCF | EIF3L     |
| CTCF | EIF4E     |
| CTCF | EIF4EBP2  |
| CTCF | EIF4ENIF1 |
| CTCF | EIF4G2    |
| CTCF | ELAVL1    |
| CTCF | ELF1      |
| CTCF | ELMOD2    |
| CTCF | ELOF1     |
| CTCF | ELOVL5    |
| CTCF | ELP5      |
| CTCF | ELP6      |
| CTCF | EMC7      |
| CTCF | EMC9      |
| CTCF | EMD       |

|      |           |
|------|-----------|
| CTCF | ENOX2     |
| CTCF | ENSA      |
| CTCF | ENTPD4    |
| CTCF | ENY2      |
| CTCF | EPC1      |
| CTCF | EPC2      |
| CTCF | EPN1      |
| CTCF | EPS15     |
| CTCF | EPS15L1   |
| CTCF | ERAP1     |
| CTCF | ERC1      |
| CTCF | ERCC1     |
| CTCF | ERCC3     |
| CTCF | ERGIC1    |
| CTCF | ERGIC3    |
| CTCF | ERP29     |
| CTCF | ESD       |
| CTCF | ETAA1     |
| CTCF | ETS1      |
| CTCF | EVC2      |
| CTCF | EWSR1     |
| CTCF | EX05      |
| CTCF | EX0C1     |
| CTCF | EX0C3     |
| CTCF | EX0SC10   |
| CTCF | EX0SC3    |
| CTCF | EX0SC9    |
| CTCF | EZH2      |
| CTCF | EZR       |
| CTCF | FAAP20    |
| CTCF | FADD      |
| CTCF | FADS3     |
| CTCF | FAF1      |
| CTCF | FAM104A   |
| CTCF | FAM104B   |
| CTCF | FAM107B   |
| CTCF | FAM110A   |
| CTCF | FAM111A   |
| CTCF | FAM120A   |
| CTCF | FAM120A0S |
| CTCF | FAM120B   |
| CTCF | FAM122B   |
| CTCF | FAM133B   |
| CTCF | FAM177A1  |
| CTCF | FAM192A   |
| CTCF | FAM204A   |
| CTCF | FAM217B   |
| CTCF | FAM32A    |
| CTCF | FAM49A    |
| CTCF | FAM96A    |

|      |           |
|------|-----------|
| CTCF | FANCB     |
| CTCF | FANCD2    |
| CTCF | FANCE     |
| CTCF | FANCG     |
| CTCF | FANCI     |
| CTCF | FANCL     |
| CTCF | FBXL12    |
| CTCF | FBXL3     |
| CTCF | FBX022    |
| CTCF | FBX03     |
| CTCF | FBX042    |
| CTCF | FBX05     |
| CTCF | FBX07     |
| CTCF | FBX09     |
| CTCF | FBXW5     |
| CTCF | FCH01     |
| CTCF | FDPS      |
| CTCF | FDXR      |
| CTCF | FEM1B     |
| CTCF | FEN1      |
| CTCF | FGFR10P2  |
| CTCF | FIBP      |
| CTCF | FIGNL1    |
| CTCF | FIP1L1    |
| CTCF | FKBP1A    |
| CTCF | FKBP3     |
| CTCF | FL0T1     |
| CTCF | FL0T2     |
| CTCF | FNBP4     |
| CTCF | FNIP1     |
| CTCF | FNTA      |
| CTCF | FOPNL     |
| CTCF | FOXK2     |
| CTCF | FOXM1     |
| CTCF | FOXN2     |
| CTCF | FRA10AC1  |
| CTCF | FSCN1     |
| CTCF | FTH1      |
| CTCF | FTL       |
| CTCF | FTX       |
| CTCF | FUS       |
| CTCF | FZR1      |
| CTCF | G3BP1     |
| CTCF | G6PC3     |
| CTCF | GABARAP   |
| CTCF | GABARAPL2 |
| CTCF | GABPB2    |
| CTCF | GATAD2A   |
| CTCF | GCA       |
| CTCF | GDI1      |

|      |         |
|------|---------|
| CTCF | GDI2    |
| CTCF | GEMIN2  |
| CTCF | GEMIN5  |
| CTCF | GEN1    |
| CTCF | GGA1    |
| CTCF | GGA2    |
| CTCF | GGNBP2  |
| CTCF | GHITM   |
| CTCF | GID8    |
| CTCF | GIGYF2  |
| CTCF | GINS3   |
| CTCF | GIT2    |
| CTCF | GLE1    |
| CTCF | GLMN    |
| CTCF | GLRX5   |
| CTCF | GLS     |
| CTCF | GMCL1   |
| CTCF | GMFB    |
| CTCF | GMFG    |
| CTCF | GMNN    |
| CTCF | GNA12   |
| CTCF | GNA13   |
| CTCF | GNAI2   |
| CTCF | GNAI3   |
| CTCF | GNAS    |
| CTCF | GNAZ    |
| CTCF | GNB1L   |
| CTCF | GNB2    |
| CTCF | GNB4    |
| CTCF | GNG5    |
| CTCF | GNL1    |
| CTCF | GNL3L   |
| CTCF | GNPAT   |
| CTCF | GOLGA2  |
| CTCF | GPAA1   |
| CTCF | GPATCH8 |
| CTCF | GPBP1   |
| CTCF | GPCPD1  |
| CTCF | GPD2    |
| CTCF | GPN1    |
| CTCF | GPN3    |
| CTCF | GPS1    |
| CTCF | GPSM2   |
| CTCF | GPSM3   |
| CTCF | GPX4    |
| CTCF | GRAMD1A |
| CTCF | GRAMD4  |
| CTCF | GRB2    |
| CTCF | GRIPAP1 |
| CTCF | GRK2    |

|      |          |
|------|----------|
| CTCF | GRK6     |
| CTCF | GRPEL2   |
| CTCF | GSDMD    |
| CTCF | GSK3A    |
| CTCF | GSS      |
| CTCF | GTDC1    |
| CTCF | GTF2A1   |
| CTCF | GTF2A2   |
| CTCF | GTF2B    |
| CTCF | GTF2E2   |
| CTCF | GTF2F1   |
| CTCF | GTF2F2   |
| CTCF | GTF2I    |
| CTCF | GTSE1    |
| CTCF | H1FX     |
| CTCF | H2AFV    |
| CTCF | H2AFX    |
| CTCF | H2AFY    |
| CTCF | H2AFZ    |
| CTCF | H3F3A    |
| CTCF | H3F3B    |
| CTCF | H6PD     |
| CTCF | HACD2    |
| CTCF | HAGHL    |
| CTCF | HARS     |
| CTCF | HAUS4    |
| CTCF | HAUS5    |
| CTCF | HAUS6    |
| CTCF | HAUS8    |
| CTCF | HBS1L    |
| CTCF | HCFC1    |
| CTCF | HDAC5    |
| CTCF | HDLBP    |
| CTCF | HEBP2    |
| CTCF | HELQ     |
| CTCF | HELZ     |
| CTCF | HENMT1   |
| CTCF | HERC1    |
| CTCF | HERC2    |
| CTCF | HERPUD2  |
| CTCF | HES6     |
| CTCF | HGS      |
| CTCF | HIF1A    |
| CTCF | HIGD2A   |
| CTCF | HINT1    |
| CTCF | HINT2    |
| CTCF | HIRIP3   |
| CTCF | HIST1H1D |
| CTCF | HIST1H1E |
| CTCF | HJURP    |



|      |           |
|------|-----------|
| CTCF | HMBS      |
| CTCF | HMG20B    |
| CTCF | HMGA1     |
| CTCF | HMGB1     |
| CTCF | HMGB2     |
| CTCF | HMGB3     |
| CTCF | HMGN1     |
| CTCF | HMGN2     |
| CTCF | HMGXB3    |
| CTCF | HMGXB4    |
| CTCF | HMMR      |
| CTCF | HNRNPA0   |
| CTCF | HNRNPA1   |
| CTCF | HNRNPA2B1 |
| CTCF | HNRNPA3   |
| CTCF | HNRNPD    |
| CTCF | HNRNPH1   |
| CTCF | HNRNPH2   |
| CTCF | HNRNPH3   |
| CTCF | HNRNPK    |
| CTCF | HNRNPM    |
| CTCF | HNRNPR    |
| CTCF | HNRNPU    |
| CTCF | HNRNPUL1  |
| CTCF | HNRNPUL2  |
| CTCF | HOXB7     |
| CTCF | HP1BP3    |
| CTCF | HPF1      |
| CTCF | HRAS      |
| CTCF | HSBP1     |
| CTCF | HSF1      |
| CTCF | HSF2      |
| CTCF | HSP90AA1  |
| CTCF | HSPBAP1   |
| CTCF | HTATSF1   |
| CTCF | HTRA2     |
| CTCF | HUS1      |
| CTCF | HUWE1     |
| CTCF | HYLS1     |
| CTCF | ID3       |
| CTCF | IDE       |
| CTCF | IDH2      |
| CTCF | IDH3A     |
| CTCF | IDI1      |
| CTCF | IFT122    |
| CTCF | IFT20     |
| CTCF | IFT74     |
| CTCF | IFT88     |
| CTCF | IKBKB     |
| CTCF | IKBKG     |

|      |         |
|------|---------|
| CTCF | IKZF1   |
| CTCF | IKZF3   |
| CTCF | ILF3    |
| CTCF | ILKAP   |
| CTCF | IMMT    |
| CTCF | INCENP  |
| CTCF | ING1    |
| CTCF | ING2    |
| CTCF | ING3    |
| CTCF | INIP    |
| CTCF | IN080C  |
| CTCF | IN080E  |
| CTCF | INPPL1  |
| CTCF | INSIG2  |
| CTCF | INTS10  |
| CTCF | IP6K1   |
| CTCF | IP07    |
| CTCF | IP09    |
| CTCF | IQGAP1  |
| CTCF | IRF1    |
| CTCF | IRF2BP1 |
| CTCF | IRF9    |
| CTCF | ISCA2   |
| CTCF | ISY1    |
| CTCF | ITFG1   |
| CTCF | ITFG2   |
| CTCF | ITGB3BP |
| CTCF | ITGB7   |
| CTCF | ITSN2   |
| CTCF | IWS1    |
| CTCF | JADE2   |
| CTCF | JAK1    |
| CTCF | JKAMP   |
| CTCF | JMJD1C  |
| CTCF | KANSL1  |
| CTCF | KANSL2  |
| CTCF | KARS    |
| CTCF | KAT5    |
| CTCF | KATNA1  |
| CTCF | KATNAL1 |
| CTCF | KBTBD2  |
| CTCF | KCNAB2  |
| CTCF | KCNK12  |
| CTCF | KCNMB4  |
| CTCF | KCTD15  |
| CTCF | KCTD17  |
| CTCF | KCTD20  |
| CTCF | KDM4A   |
| CTCF | KDM5A   |
| CTCF | KDM5C   |

|      |          |
|------|----------|
| CTCF | KHDRBS1  |
| CTCF | KIAA1586 |
| CTCF | KIAA1841 |
| CTCF | KIAA2026 |
| CTCF | KIF11    |
| CTCF | KIF15    |
| CTCF | KIF18B   |
| CTCF | KIF1BP   |
| CTCF | KIF20B   |
| CTCF | KIF22    |
| CTCF | KIF23    |
| CTCF | KIF2A    |
| CTCF | KIF2C    |
| CTCF | KIF3A    |
| CTCF | KIF5B    |
| CTCF | KIFC1    |
| CTCF | KIN      |
| CTCF | KLC2     |
| CTCF | KLF10    |
| CTCF | KLF2     |
| CTCF | KLHDC2   |
| CTCF | KLHDC3   |
| CTCF | KLHDC4   |
| CTCF | KLHL36   |
| CTCF | KMT2C    |
| CTCF | KMT2E    |
| CTCF | KMT5B    |
| CTCF | KNTC1    |
| CTCF | KPNA3    |
| CTCF | KPNB1    |
| CTCF | KRAS     |
| CTCF | KRR1     |
| CTCF | KTN1     |
| CTCF | KXD1     |
| CTCF | KYAT3    |
| CTCF | LACC1    |
| CTCF | LAMTOR3  |
| CTCF | LAMTOR4  |
| CTCF | LAPTM4B  |
| CTCF | LARP4B   |
| CTCF | LARP7    |
| CTCF | LARS2    |
| CTCF | LAS1L    |
| CTCF | LAT2     |
| CTCF | LATS1    |
| CTCF | LBR      |
| CTCF | LCOR     |
| CTCF | LCORL    |
| CTCF | LE01     |
| CTCF | LETMD1   |

|      |           |
|------|-----------|
| CTCF | LIG1      |
| CTCF | LIMK2     |
| CTCF | LINC00487 |
| CTCF | LINC01006 |
| CTCF | LINC01013 |
| CTCF | LINC01134 |
| CTCF | LIPE      |
| CTCF | LIPT2     |
| CTCF | LMF2      |
| CTCF | LMNB1     |
| CTCF | LMNB2     |
| CTCF | LM07      |
| CTCF | LNPEP     |
| CTCF | LPCAT3    |
| CTCF | LPIN1     |
| CTCF | LPIN2     |
| CTCF | LPP       |
| CTCF | LRCH4     |
| CTCF | LRIF1     |
| CTCF | LRP10     |
| CTCF | LRR1      |
| CTCF | LRRC1     |
| CTCF | LRRC57    |
| CTCF | LRRC58    |
| CTCF | LRRFIP1   |
| CTCF | LRT0MT    |
| CTCF | LSM14A    |
| CTCF | LSM14B    |
| CTCF | LSM2      |
| CTCF | LSM3      |
| CTCF | LSM4      |
| CTCF | LSM5      |
| CTCF | LSM8      |
| CTCF | LTA       |
| CTCF | LTBP4     |
| CTCF | LTN1      |
| CTCF | LUC7L2    |
| CTCF | LY6E      |
| CTCF | LYL1      |
| CTCF | LYPLA2    |
| CTCF | LYRM1     |
| CTCF | LYRM2     |
| CTCF | MAD1L1    |
| CTCF | MAD2L1    |
| CTCF | MAD2L1BP  |
| CTCF | MAD2L2    |
| CTCF | MADD      |
| CTCF | MAEA      |
| CTCF | MAGEF1    |
| CTCF | MAP1LC3B  |

|      |          |
|------|----------|
| CTCF | MAP2K1   |
| CTCF | MAP3K7   |
| CTCF | MAP4K1   |
| CTCF | MAP7D1   |
| CTCF | MAPK1    |
| CTCF | MAPK10   |
| CTCF | MAPK8    |
| CTCF | MAPK9    |
| CTCF | MAPRE1   |
| CTCF | MARCH5   |
| CTCF | MARCH7   |
| CTCF | MARCH9   |
| CTCF | MARK3    |
| CTCF | MAT2B    |
| CTCF | MAZ      |
| CTCF | MBD4     |
| CTCF | MBNL1    |
| CTCF | MCM3     |
| CTCF | MCM7     |
| CTCF | MCPH1    |
| CTCF | MCRIP1   |
| CTCF | MDC1     |
| CTCF | MDM1     |
| CTCF | MDM4     |
| CTCF | MEA1     |
| CTCF | MEAF6    |
| CTCF | MED1     |
| CTCF | MED11    |
| CTCF | MED13    |
| CTCF | MED13L   |
| CTCF | MED15    |
| CTCF | MED20    |
| CTCF | MED21    |
| CTCF | MED25    |
| CTCF | MED27    |
| CTCF | MED30    |
| CTCF | MED31    |
| CTCF | MED4     |
| CTCF | MED7     |
| CTCF | MED8     |
| CTCF | MEF2A    |
| CTCF | MEF2C    |
| CTCF | MEF2D    |
| CTCF | MEGF11   |
| CTCF | MELK     |
| CTCF | MEPCE    |
| CTCF | MET      |
| CTCF | METTTL14 |
| CTCF | METTTL15 |
| CTCF | METTTL23 |

|      |            |
|------|------------|
| CTCF | METTL4     |
| CTCF | METTL5     |
| CTCF | METTL9     |
| CTCF | MFF        |
| CTCF | MFGE8      |
| CTCF | MFNG       |
| CTCF | MFSD11     |
| CTCF | MFSD14B    |
| CTCF | MFSD14C    |
| CTCF | MFSD5      |
| CTCF | MGME1      |
| CTCF | MIB1       |
| CTCF | MICAL1     |
| CTCF | MICAL3     |
| CTCF | MICU1      |
| CTCF | MID1IP1    |
| CTCF | MIDN       |
| CTCF | MIEN1      |
| CTCF | MIER1      |
| CTCF | MIF4GD     |
| CTCF | MIR181A1HG |
| CTCF | MIS18A     |
| CTCF | MKI67      |
| CTCF | MKRN1      |
| CTCF | MKRN2      |
| CTCF | MLF2       |
| CTCF | MLLT10     |
| CTCF | MLLT6      |
| CTCF | MLST8      |
| CTCF | MLX        |
| CTCF | MLXIP      |
| CTCF | MMADHC     |
| CTCF | MMGT1      |
| CTCF | MND1       |
| CTCF | MOB1A      |
| CTCF | MOB4       |
| CTCF | MOCS2      |
| CTCF | MORF4L1    |
| CTCF | MPC1       |
| CTCF | MPC2       |
| CTCF | MPDU1      |
| CTCF | MPHOSPH6   |
| CTCF | MPHOSPH8   |
| CTCF | MPLKIP     |
| CTCF | MPND       |
| CTCF | MPP5       |
| CTCF | MRPL17     |
| CTCF | MRPL18     |
| CTCF | MRPL22     |
| CTCF | MRPL27     |

|      |         |
|------|---------|
| CTCF | MRPL34  |
| CTCF | MRPL37  |
| CTCF | MRPL40  |
| CTCF | MRPL47  |
| CTCF | MRPL48  |
| CTCF | MRPL51  |
| CTCF | MRPL54  |
| CTCF | MRPS10  |
| CTCF | MRPS14  |
| CTCF | MRPS16  |
| CTCF | MRPS18C |
| CTCF | MRPS6   |
| CTCF | MRPS9   |
| CTCF | MSANTD2 |
| CTCF | MSI2    |
| CTCF | MSL1    |
| CTCF | MSL3    |
| CTCF | MSM01   |
| CTCF | MSN     |
| CTCF | MSRA    |
| CTCF | MTA3    |
| CTCF | MTERF3  |
| CTCF | MTF2    |
| CTCF | MTFR2   |
| CTCF | MTG2    |
| CTCF | MTIF2   |
| CTCF | MTIF3   |
| CTCF | MTOR    |
| CTCF | MTPAP   |
| CTCF | MTPN    |
| CTCF | MTX3    |
| CTCF | MVB12A  |
| CTCF | MVK     |
| CTCF | MXD3    |
| CTCF | MYBL1   |
| CTCF | MYBL2   |
| CTCF | MYD88   |
| CTCF | MYEF2   |
| CTCF | MYL12A  |
| CTCF | MYL12B  |
| CTCF | MYO1C   |
| CTCF | MYO9B   |
| CTCF | MZT1    |
| CTCF | N4BP2L2 |
| CTCF | N4BP3   |
| CTCF | NAA38   |
| CTCF | NAA40   |
| CTCF | NAB2    |
| CTCF | NABP2   |
| CTCF | NACC1   |

|      |          |
|------|----------|
| CTCF | NAGK     |
| CTCF | NAIF1    |
| CTCF | NAP1L1   |
| CTCF | NAP1L4   |
| CTCF | NBEAL1   |
| CTCF | NCAPD3   |
| CTCF | NCAPG    |
| CTCF | NCAPG2   |
| CTCF | NCAPH2   |
| CTCF | NC0A3    |
| CTCF | NCOR1    |
| CTCF | NDUFA12  |
| CTCF | NDUFA4L2 |
| CTCF | NDUFA6   |
| CTCF | NDUFB4   |
| CTCF | NDUFB6   |
| CTCF | NDUFB7   |
| CTCF | NDUFC1   |
| CTCF | NDUFS1   |
| CTCF | NDUFS3   |
| CTCF | NDUFS7   |
| CTCF | NDUFS8   |
| CTCF | NECAP1   |
| CTCF | NECAP2   |
| CTCF | NEDD1    |
| CTCF | NEIL1    |
| CTCF | NEIL3    |
| CTCF | NEK4     |
| CTCF | NEK9     |
| CTCF | NELFB    |
| CTCF | NELFE    |
| CTCF | NET1     |
| CTCF | NFATC2IP |
| CTCF | NFKBIL1  |
| CTCF | NFYB     |
| CTCF | NFYC     |
| CTCF | NKAP     |
| CTCF | NKTR     |
| CTCF | NLRC5    |
| CTCF | NME6     |
| CTCF | NMNAT1   |
| CTCF | NNT-AS1  |
| CTCF | NOM1     |
| CTCF | NONO     |
| CTCF | NOP56    |
| CTCF | NPAT     |
| CTCF | NPEPPS   |
| CTCF | NPHP1    |
| CTCF | NR1H2    |
| CTCF | NR3C1    |



|      |          |
|------|----------|
| CTCF | NRBP1    |
| CTCF | NRDE2    |
| CTCF | NREP     |
| CTCF | NRGN     |
| CTCF | NSA2     |
| CTCF | NSF      |
| CTCF | NSL1     |
| CTCF | NSMCE4A  |
| CTCF | NSUN5    |
| CTCF | NT5C     |
| CTCF | NTAN1    |
| CTCF | NUCKS1   |
| CTCF | NUDT1    |
| CTCF | NUDT15   |
| CTCF | NUDT16L1 |
| CTCF | NUDT18   |
| CTCF | NUDT2    |
| CTCF | NUDT21   |
| CTCF | NUDT5    |
| CTCF | NUMA1    |
| CTCF | NUP107   |
| CTCF | NUP155   |
| CTCF | NUP37    |
| CTCF | NUP50    |
| CTCF | NUP58    |
| CTCF | NUP62    |
| CTCF | NUP88    |
| CTCF | NUP98    |
| CTCF | NUTF2    |
| CTCF | NXF1     |
| CTCF | NXPH4    |
| CTCF | OARD1    |
| CTCF | OCIAD2   |
| CTCF | ODF2     |
| CTCF | OFD1     |
| CTCF | OGF0D3   |
| CTCF | OGFR     |
| CTCF | ORAI2    |
| CTCF | ORC3     |
| CTCF | ORC6     |
| CTCF | ORMDL2   |
| CTCF | OSBP     |
| CTCF | OSBPL11  |
| CTCF | OSBPL8   |
| CTCF | OSER1    |
| CTCF | OTUB1    |
| CTCF | OTUD6B   |
| CTCF | OXCT1    |
| CTCF | P2RX5    |
| CTCF | PABPC1   |

|      |          |
|------|----------|
| CTCF | PABPN1   |
| CTCF | PAFAH1B1 |
| CTCF | PAFAH1B3 |
| CTCF | PAG1     |
| CTCF | PAGR1    |
| CTCF | PAIP2    |
| CTCF | PAIP2B   |
| CTCF | PAN2     |
| CTCF | PAN3     |
| CTCF | PAPOLA   |
| CTCF | PARG     |
| CTCF | PARP6    |
| CTCF | PARVG    |
| CTCF | PATL1    |
| CTCF | PAX5     |
| CTCF | PAXBP1   |
| CTCF | PBK      |
| CTCF | PBRM1    |
| CTCF | PBX2     |
| CTCF | PCBD2    |
| CTCF | PCBP1    |
| CTCF | PCBP2    |
| CTCF | PCDH9    |
| CTCF | PCF11    |
| CTCF | PCGF6    |
| CTCF | PCID2    |
| CTCF | PCIF1    |
| CTCF | PCM1     |
| CTCF | PCMT1    |
| CTCF | PCMTD2   |
| CTCF | PCNT     |
| CTCF | PCSK7    |
| CTCF | PDCD10   |
| CTCF | PDCD2    |
| CTCF | PDCD6    |
| CTCF | PDCD6IP  |
| CTCF | PDCL     |
| CTCF | PDE4DIP  |
| CTCF | PDLIM1   |
| CTCF | PDLIM7   |
| CTCF | PDRG1    |
| CTCF | PDS5A    |
| CTCF | PDS5B    |
| CTCF | PDZD11   |
| CTCF | PECAM1   |
| CTCF | PELP1    |
| CTCF | PER2     |
| CTCF | PET100   |
| CTCF | PEX2     |
| CTCF | PEX26    |

|      |         |
|------|---------|
| CTCF | PFDN1   |
| CTCF | PFDN2   |
| CTCF | PFDN5   |
| CTCF | PFKP    |
| CTCF | PGLS    |
| CTCF | PGP     |
| CTCF | PGS1    |
| CTCF | PHACTR4 |
| CTCF | PHAX    |
| CTCF | PHB2    |
| CTCF | PHF13   |
| CTCF | PHF19   |
| CTCF | PHF20L1 |
| CTCF | PHF21A  |
| CTCF | PHF23   |
| CTCF | PHF3    |
| CTCF | PHF5A   |
| CTCF | PHF7    |
| CTCF | PHIP    |
| CTCF | PHKG1   |
| CTCF | PHPT1   |
| CTCF | PHYKPL  |
| CTCF | PIAS1   |
| CTCF | PIAS3   |
| CTCF | PIDD1   |
| CTCF | PIF1    |
| CTCF | PIGB0S1 |
| CTCF | PIGK    |
| CTCF | PIGQ    |
| CTCF | PIH1D1  |
| CTCF | PIK3C2B |
| CTCF | PILRB   |
| CTCF | PIN1    |
| CTCF | PIN4    |
| CTCF | PIP5K1C |
| CTCF | PISD    |
| CTCF | PITPNA  |
| CTCF | PJA2    |
| CTCF | PKMYT1  |
| CTCF | PKN0X1  |
| CTCF | PLCG2   |
| CTCF | PLEKHA8 |
| CTCF | PLEKHF2 |
| CTCF | PLK1    |
| CTCF | PLK4    |
| CTCF | PLPP1   |
| CTCF | PMPCB   |
| CTCF | PMVK    |
| CTCF | PNISR   |
| CTCF | PNKD    |

|      |          |
|------|----------|
| CTCF | PNKP     |
| CTCF | PNN      |
| CTCF | PNPLA2   |
| CTCF | PNPLA8   |
| CTCF | PNRC2    |
| CTCF | POC1B    |
| CTCF | POC5     |
| CTCF | POGZ     |
| CTCF | POLA2    |
| CTCF | POLD3    |
| CTCF | POLG2    |
| CTCF | POLH     |
| CTCF | POLM     |
| CTCF | POLR2A   |
| CTCF | POLR2B   |
| CTCF | POLR2C   |
| CTCF | POLR2D   |
| CTCF | POLR2E   |
| CTCF | POLR2G   |
| CTCF | POLR2K   |
| CTCF | POMGNT1  |
| CTCF | POP7     |
| CTCF | POU2F2   |
| CTCF | PPDPF    |
| CTCF | PPHLN1   |
| CTCF | PPIA     |
| CTCF | PPIE     |
| CTCF | PPIG     |
| CTCF | PPIH     |
| CTCF | PPIL2    |
| CTCF | PPIP5K2  |
| CTCF | PPM1B    |
| CTCF | PPM1D    |
| CTCF | PPM1G    |
| CTCF | PPP1CA   |
| CTCF | PPP1CB   |
| CTCF | PPP1CC   |
| CTCF | PPP1R12A |
| CTCF | PPP1R12C |
| CTCF | PPP1R14A |
| CTCF | PPP1R15B |
| CTCF | PPP1R16A |
| CTCF | PPP1R18  |
| CTCF | PPP1R7   |
| CTCF | PPP2CA   |
| CTCF | PPP2R1A  |
| CTCF | PPP2R2A  |
| CTCF | PPP2R2D  |
| CTCF | PPP2R3C  |
| CTCF | PPP2R5E  |

|      |         |
|------|---------|
| CTCF | PPP3CB  |
| CTCF | PPP3CC  |
| CTCF | PPP4C   |
| CTCF | PPP4R2  |
| CTCF | PPP4R3A |
| CTCF | PPP4R3B |
| CTCF | PPP6C   |
| CTCF | PPP6R1  |
| CTCF | PPP6R2  |
| CTCF | PRCC    |
| CTCF | PRDM2   |
| CTCF | PRDX2   |
| CTCF | PRIM1   |
| CTCF | PRIM2   |
| CTCF | PRKAR1A |
| CTCF | PRKCB   |
| CTCF | PRKD3   |
| CTCF | PRKDC   |
| CTCF | PRKRA   |
| CTCF | PRMT2   |
| CTCF | PRPF18  |
| CTCF | PRPF38A |
| CTCF | PRPF38B |
| CTCF | PRPF4B  |
| CTCF | PRPF6   |
| CTCF | PRPF8   |
| CTCF | PRPS1   |
| CTCF | PRPSAP1 |
| CTCF | PRR14   |
| CTCF | PRRC2C  |
| CTCF | PSD4    |
| CTCF | PSIP1   |
| CTCF | PSMA4   |
| CTCF | PSMB10  |
| CTCF | PSMB2   |
| CTCF | PSMB3   |
| CTCF | PSMB4   |
| CTCF | PSMC1   |
| CTCF | PSMC2   |
| CTCF | PSMC4   |
| CTCF | PSMD1   |
| CTCF | PSMD13  |
| CTCF | PSMD2   |
| CTCF | PSMD7   |
| CTCF | PSMD8   |
| CTCF | PSMD9   |
| CTCF | PSMF1   |
| CTCF | PSMG2   |
| CTCF | PSPC1   |
| CTCF | PSRC1   |

|      |            |
|------|------------|
| CTCF | PTBP1      |
| CTCF | PTEN       |
| CTCF | PTGES3     |
| CTCF | PTK2B      |
| CTCF | PTMA       |
| CTCF | PTP4A1     |
| CTCF | PTP4A2     |
| CTCF | PTPN18     |
| CTCF | PTPRA      |
| CTCF | PTRHD1     |
| CTCF | PTS        |
| CTCF | PTTG1IP    |
| CTCF | PUM2       |
| CTCF | PURA       |
| CTCF | PUS10      |
| CTCF | PYCR2      |
| CTCF | PYGB       |
| CTCF | QRICH1     |
| CTCF | RAB11A     |
| CTCF | RAB11B     |
| CTCF | RAB11B-AS1 |
| CTCF | RAB11FIP4  |
| CTCF | RAB14      |
| CTCF | RAB1B      |
| CTCF | RAB22A     |
| CTCF | RAB27A     |
| CTCF | RAB28      |
| CTCF | RAB2A      |
| CTCF | RAB5C      |
| CTCF | RAB6A      |
| CTCF | RAB7A      |
| CTCF | RABEP1     |
| CTCF | RABIF      |
| CTCF | RABL6      |
| CTCF | RAC1       |
| CTCF | RAC2       |
| CTCF | RACGAP1    |
| CTCF | RACK1      |
| CTCF | RAD1       |
| CTCF | RAD21      |
| CTCF | RAD23B     |
| CTCF | RAD51AP1   |
| CTCF | RAD51C     |
| CTCF | RAE1       |
| CTCF | RAF1       |
| CTCF | RALBP1     |
| CTCF | RALY       |
| CTCF | RANGAP1    |
| CTCF | RAPGEF5    |
| CTCF | RASSF1     |

|      |             |
|------|-------------|
| CTCF | RBAK-RBAKDN |
| CTCF | RBBP4       |
| CTCF | RBBP7       |
| CTCF | RBBP9       |
| CTCF | RBL2        |
| CTCF | RBM10       |
| CTCF | RBM12       |
| CTCF | RBM17       |
| CTCF | RBM22       |
| CTCF | RBM23       |
| CTCF | RBM39       |
| CTCF | RBM4        |
| CTCF | RBM45       |
| CTCF | RBM4B       |
| CTCF | RBM5        |
| CTCF | RBM6        |
| CTCF | RBM8A       |
| CTCF | RBMX        |
| CTCF | RBMXL1      |
| CTCF | RBX1        |
| CTCF | RCC2        |
| CTCF | RCCD1       |
| CTCF | RCOR3       |
| CTCF | RCSD1       |
| CTCF | RDM1        |
| CTCF | REEP4       |
| CTCF | RELB        |
| CTCF | REST        |
| CTCF | REV1        |
| CTCF | REV3L       |
| CTCF | RFC3        |
| CTCF | RFC4        |
| CTCF | RFT1        |
| CTCF | RFWD3       |
| CTCF | RFX1        |
| CTCF | RFX2        |
| CTCF | RFX3        |
| CTCF | RFX5        |
| CTCF | RHEB        |
| CTCF | RHN01       |
| CTCF | RH0H        |
| CTCF | RIC8A       |
| CTCF | RICTOR      |
| CTCF | RIMKLB      |
| CTCF | RING1       |
| CTCF | RIPK2       |
| CTCF | RMDN1       |
| CTCF | RMI1        |
| CTCF | RNASEH2B    |
| CTCF | RNASEH2C    |

|      |         |
|------|---------|
| CTCF | RNF13   |
| CTCF | RNF146  |
| CTCF | RNF19A  |
| CTCF | RNF20   |
| CTCF | RNF216  |
| CTCF | RNF219  |
| CTCF | RNF34   |
| CTCF | RNF41   |
| CTCF | RNF8    |
| CTCF | RNFT1   |
| CTCF | ROCK1   |
| CTCF | ROCK2   |
| CTCF | RPA2    |
| CTCF | RPL10   |
| CTCF | RPL11   |
| CTCF | RPL12   |
| CTCF | RPL13A  |
| CTCF | RPL14   |
| CTCF | RPL15   |
| CTCF | RPL18   |
| CTCF | RPL18A  |
| CTCF | RPL22L1 |
| CTCF | RPL23A  |
| CTCF | RPL26   |
| CTCF | RPL27   |
| CTCF | RPL28   |
| CTCF | RPL29   |
| CTCF | RPL3    |
| CTCF | RPL30   |
| CTCF | RPL31   |
| CTCF | RPL32   |
| CTCF | RPL35   |
| CTCF | RPL35A  |
| CTCF | RPL36   |
| CTCF | RPL37   |
| CTCF | RPL37A  |
| CTCF | RPL38   |
| CTCF | RPL4    |
| CTCF | RPL41   |
| CTCF | RPL6    |
| CTCF | RPL8    |
| CTCF | RPLP0   |
| CTCF | RPLP1   |
| CTCF | RPLP2   |
| CTCF | RPP30   |
| CTCF | RPRD1A  |
| CTCF | RPS10   |
| CTCF | RPS11   |
| CTCF | RPS13   |
| CTCF | RPS14   |



|      |         |
|------|---------|
| CTCF | RPS15   |
| CTCF | RPS16   |
| CTCF | RPS17   |
| CTCF | RPS18   |
| CTCF | RPS19   |
| CTCF | RPS20   |
| CTCF | RPS21   |
| CTCF | RPS23   |
| CTCF | RPS26   |
| CTCF | RPS27   |
| CTCF | RPS29   |
| CTCF | RPS3    |
| CTCF | RPS3A   |
| CTCF | RPS6    |
| CTCF | RPS6KA1 |
| CTCF | RPS6KB2 |
| CTCF | RPS7    |
| CTCF | RPS8    |
| CTCF | RPS9    |
| CTCF | RPSA    |
| CTCF | RRAGC   |
| CTCF | RRAS2   |
| CTCF | RRM1    |
| CTCF | RRM2    |
| CTCF | RRM2B   |
| CTCF | RSBN1   |
| CTCF | RSF1    |
| CTCF | RSPH14  |
| CTCF | RSRC1   |
| CTCF | RSRC2   |
| CTCF | RSRP1   |
| CTCF | RTCA    |
| CTCF | RTCB    |
| CTCF | RTN3    |
| CTCF | RTN4    |
| CTCF | RUFY3   |
| CTCF | RUNX1   |
| CTCF | RUVBL2  |
| CTCF | RWDD3   |
| CTCF | RXRB    |
| CTCF | RYBP    |
| CTCF | S100A10 |
| CTCF | S1PR2   |
| CTCF | SAC3D1  |
| CTCF | SAE1    |
| CTCF | SAFB    |
| CTCF | SAMHD1  |
| CTCF | SAP18   |
| CTCF | SAP30BP |
| CTCF | SASS6   |

|      |          |
|------|----------|
| CTCF | SAV1     |
| CTCF | SBF1     |
| CTCF | SCAF11   |
| CTCF | SCAF4    |
| CTCF | SCFD2    |
| CTCF | SCMH1    |
| CTCF | SCNM1    |
| CTCF | SCYL3    |
| CTCF | SDCCAG8  |
| CTCF | SDF2     |
| CTCF | SDHA     |
| CTCF | SDHAF2   |
| CTCF | SDR39U1  |
| CTCF | SEC11A   |
| CTCF | SEC14L1  |
| CTCF | SEC22C   |
| CTCF | SECISBP2 |
| CTCF | SENP1    |
| CTCF | SENP6    |
| CTCF | SEPHS1   |
| CTCF | SEPT11   |
| CTCF | SEPT6    |
| CTCF | SEPT7    |
| CTCF | SERINC3  |
| CTCF | SERP2    |
| CTCF | SETD2    |
| CTCF | SETD3    |
| CTCF | SETMAR   |
| CTCF | SF1      |
| CTCF | SF3A2    |
| CTCF | SF3B1    |
| CTCF | SF3B2    |
| CTCF | SF3B4    |
| CTCF | SF3B6    |
| CTCF | SFMBT1   |
| CTCF | SFPQ     |
| CTCF | SFR1     |
| CTCF | SFSWAP   |
| CTCF | SG01     |
| CTCF | SG02     |
| CTCF | SGPP1    |
| CTCF | SH2B1    |
| CTCF | SH3GL1   |
| CTCF | SH3GLB2  |
| CTCF | SH3KBP1  |
| CTCF | SHARPIN  |
| CTCF | SHC1     |
| CTCF | SHCBP1   |
| CTCF | SHISA8   |
| CTCF | SHKBP1   |

|      |          |
|------|----------|
| CTCF | SHMT2    |
| CTCF | SHOC2    |
| CTCF | SHQ1     |
| CTCF | SIMC1    |
| CTCF | SIPA1    |
| CTCF | SIRT5    |
| CTCF | SIRT6    |
| CTCF | SKA1     |
| CTCF | SKA2     |
| CTCF | SLBP     |
| CTCF | SLC12A2  |
| CTCF | SLC16A4  |
| CTCF | SLC25A1  |
| CTCF | SLC25A14 |
| CTCF | SLC25A19 |
| CTCF | SLC25A42 |
| CTCF | SLC2A1   |
| CTCF | SLC35C2  |
| CTCF | SLC37A4  |
| CTCF | SLC43A2  |
| CTCF | SLC4A2   |
| CTCF | SLC5A3   |
| CTCF | SLC6A16  |
| CTCF | SLC9A3R1 |
| CTCF | SLF1     |
| CTCF | SLU7     |
| CTCF | SMAD2    |
| CTCF | SMARCA2  |
| CTCF | SMARCA4  |
| CTCF | SMARCA5  |
| CTCF | SMARCAL1 |
| CTCF | SMARCB1  |
| CTCF | SMARCC2  |
| CTCF | SMARCD1  |
| CTCF | SMARCE1  |
| CTCF | SMC1A    |
| CTCF | SMC1B    |
| CTCF | SMC2     |
| CTCF | SMC3     |
| CTCF | SMC4     |
| CTCF | SMCHD1   |
| CTCF | SMCR5    |
| CTCF | SMIM19   |
| CTCF | SMIM7    |
| CTCF | SMNDC1   |
| CTCF | SMTN     |
| CTCF | SMU1     |
| CTCF | SMURF2   |
| CTCF | SNF8     |
| CTCF | SNRNP27  |

|      |          |
|------|----------|
| CTCF | SNRNP40  |
| CTCF | SNRNP48  |
| CTCF | SNRNP70  |
| CTCF | SNRPA    |
| CTCF | SNRPA1   |
| CTCF | SNRPB    |
| CTCF | SNRPF    |
| CTCF | SNRPG    |
| CTCF | SNX1     |
| CTCF | SNX14    |
| CTCF | SNX16    |
| CTCF | SNX19    |
| CTCF | SNX20    |
| CTCF | SNX3     |
| CTCF | S0CS1    |
| CTCF | S0N      |
| CTCF | S0X4     |
| CTCF | SP2      |
| CTCF | SPAG7    |
| CTCF | SPATA2L  |
| CTCF | SPDL1    |
| CTCF | SPG7     |
| CTCF | SP0P     |
| CTCF | SPPL2A   |
| CTCF | SPRTN    |
| CTCF | SPRYD3   |
| CTCF | SPTAN1   |
| CTCF | SQLE     |
| CTCF | SREK1IP1 |
| CTCF | SRGAP2C  |
| CTCF | SRP14    |
| CTCF | SRP19    |
| CTCF | SRP9     |
| CTCF | SRPK1    |
| CTCF | SRRM2    |
| CTCF | SRRT     |
| CTCF | SRSF1    |
| CTCF | SRSF10   |
| CTCF | SRSF3    |
| CTCF | SRSF4    |
| CTCF | SRSF5    |
| CTCF | SRSF7    |
| CTCF | SRSF9    |
| CTCF | SS18     |
| CTCF | SSBP2    |
| CTCF | SSNA1    |
| CTCF | SSRP1    |
| CTCF | STAG1    |
| CTCF | STAMPB   |
| CTCF | STAT2    |

|      |         |
|------|---------|
| CTCF | STAU2   |
| CTCF | STIM2   |
| CTCF | STK40   |
| CTCF | STMN1   |
| CTCF | STRBP   |
| CTCF | STRN    |
| CTCF | STRN3   |
| CTCF | STT3B   |
| CTCF | SUGP2   |
| CTCF | SUGT1   |
| CTCF | SULT1A1 |
| CTCF | SUM02   |
| CTCF | SUPT4H1 |
| CTCF | SUPT5H  |
| CTCF | SUSD1   |
| CTCF | SUSD6   |
| CTCF | SVBP    |
| CTCF | SWAP70  |
| CTCF | SWI5    |
| CTCF | SYNE1   |
| CTCF | SYNE2   |
| CTCF | SYPL1   |
| CTCF | SYT11   |
| CTCF | SYT17   |
| CTCF | SZRD1   |
| CTCF | TAB2    |
| CTCF | TACC1   |
| CTCF | TACC3   |
| CTCF | TADA3   |
| CTCF | TAF11   |
| CTCF | TAF13   |
| CTCF | TAF15   |
| CTCF | TAF1B   |
| CTCF | TAF3    |
| CTCF | TAF5    |
| CTCF | TAF6    |
| CTCF | TAGLN2  |
| CTCF | TANG02  |
| CTCF | TANK    |
| CTCF | TAP2    |
| CTCF | TARDBP  |
| CTCF | TARS2   |
| CTCF | TARSL2  |
| CTCF | TBC1D1  |
| CTCF | TBCB    |
| CTCF | TBCCD1  |
| CTCF | TBK1    |
| CTCF | TBL1XR1 |
| CTCF | TBP     |
| CTCF | TBPL1   |

|      |          |
|------|----------|
| CTCF | TCEA1    |
| CTCF | TCEAL8   |
| CTCF | TCERG1   |
| CTCF | TCF19    |
| CTCF | TCHP     |
| CTCF | TCL1A    |
| CTCF | TCOF1    |
| CTCF | TDG      |
| CTCF | TDP1     |
| CTCF | TDP2     |
| CTCF | TECR     |
| CTCF | TEL02    |
| CTCF | TEN1     |
| CTCF | TERF2IP  |
| CTCF | TES      |
| CTCF | TEX30    |
| CTCF | TFB1M    |
| CTCF | TFCP2    |
| CTCF | TFEB     |
| CTCF | TGIF2    |
| CTCF | TGOLN2   |
| CTCF | THAP1    |
| CTCF | THAP11   |
| CTCF | THOC1    |
| CTCF | THOC3    |
| CTCF | THOC5    |
| CTCF | THOC6    |
| CTCF | THOC7    |
| CTCF | THRAP3   |
| CTCF | TIFA     |
| CTCF | TIGAR    |
| CTCF | TIMM21   |
| CTCF | TIMMDC1  |
| CTCF | TINF2    |
| CTCF | TIPARP   |
| CTCF | TIPRL    |
| CTCF | TJP1     |
| CTCF | TKT      |
| CTCF | TLK1     |
| CTCF | TLN1     |
| CTCF | TM2D3    |
| CTCF | TM9SF3   |
| CTCF | TMA7     |
| CTCF | TMBIM4   |
| CTCF | TMEM107  |
| CTCF | TMEM11   |
| CTCF | TMEM123  |
| CTCF | TMEM126B |
| CTCF | TMEM14B  |
| CTCF | TMEM14C  |

|      |          |
|------|----------|
| CTCF | TMEM150A |
| CTCF | TMEM19   |
| CTCF | TMEM230  |
| CTCF | TMEM234  |
| CTCF | TMEM242  |
| CTCF | TMEM50A  |
| CTCF | TMEM60   |
| CTCF | TMEM69   |
| CTCF | TMEM87A  |
| CTCF | TMEM8B   |
| CTCF | TMF1     |
| CTCF | TMP0     |
| CTCF | TMP0-AS1 |
| CTCF | TMUB1    |
| CTCF | TMUB2    |
| CTCF | TNF      |
| CTCF | TNFSF8   |
| CTCF | TOB1     |
| CTCF | TOMM7    |
| CTCF | TOP2A    |
| CTCF | TOP2B    |
| CTCF | TOPBP1   |
| CTCF | TOPORS   |
| CTCF | TOX4     |
| CTCF | TP53RK   |
| CTCF | TPCN1    |
| CTCF | TPM1     |
| CTCF | TPM3     |
| CTCF | TPR      |
| CTCF | TPRKB    |
| CTCF | TPX2     |
| CTCF | TRA2A    |
| CTCF | TRA2B    |
| CTCF | TRABD    |
| CTCF | TRAF7    |
| CTCF | TRAIP    |
| CTCF | TRAPPC1  |
| CTCF | TRAPPC10 |
| CTCF | TRAPPC12 |
| CTCF | TRAPPC2B |
| CTCF | TRAPPC9  |
| CTCF | TRIM11   |
| CTCF | TRIM13   |
| CTCF | TRIM28   |
| CTCF | TRIM37   |
| CTCF | TRIM4    |
| CTCF | TRIOBP   |
| CTCF | TRIP11   |
| CTCF | TRNAU1AP |
| CTCF | TSC1     |

|      |         |
|------|---------|
| CTCF | TSNAX   |
| CTCF | TSR3    |
| CTCF | TSSC4   |
| CTCF | TSTD1   |
| CTCF | TTC1    |
| CTCF | TTC33   |
| CTCF | TTC39C  |
| CTCF | TTF1    |
| CTCF | TTF2    |
| CTCF | TTI2    |
| CTCF | TTK     |
| CTCF | TTLL5   |
| CTCF | TUBA1A  |
| CTCF | TUBA1B  |
| CTCF | TUBA1C  |
| CTCF | TUBA4A  |
| CTCF | TUBB    |
| CTCF | TUBB2A  |
| CTCF | TUBB4B  |
| CTCF | TUBG1   |
| CTCF | TUBGCP2 |
| CTCF | TUBGCP4 |
| CTCF | TUFM    |
| CTCF | TVP23B  |
| CTCF | TXNDC9  |
| CTCF | TYMS    |
| CTCF | U2AF1L5 |
| CTCF | UBA1    |
| CTCF | UBA3    |
| CTCF | UBA52   |
| CTCF | UBAC1   |
| CTCF | UBAC2   |
| CTCF | UBAP1   |
| CTCF | UBAP2   |
| CTCF | UBB     |
| CTCF | UBC     |
| CTCF | UBE2B   |
| CTCF | UBE2C   |
| CTCF | UBE2D2  |
| CTCF | UBE2E1  |
| CTCF | UBE2E3  |
| CTCF | UBE2G1  |
| CTCF | UBE2I   |
| CTCF | UBE2J2  |
| CTCF | UBE2K   |
| CTCF | UBE2L3  |
| CTCF | UBE2L6  |
| CTCF | UBE2O   |
| CTCF | UBE3A   |
| CTCF | UBL4A   |



|      |           |
|------|-----------|
| CTCF | UBL5      |
| CTCF | UBL7-AS1  |
| CTCF | UBLCP1    |
| CTCF | UBR2      |
| CTCF | UBR5      |
| CTCF | UBXN1     |
| CTCF | UBXN4     |
| CTCF | UBXN7     |
| CTCF | UCHL5     |
| CTCF | UCP2      |
| CTCF | UEVLD     |
| CTCF | UFC1      |
| CTCF | UGCG      |
| CTCF | UGDH      |
| CTCF | UGP2      |
| CTCF | UHRF1BP1  |
| CTCF | UHRF2     |
| CTCF | UMAD1     |
| CTCF | UNG       |
| CTCF | UNKL      |
| CTCF | UPF1      |
| CTCF | UPF3A     |
| CTCF | UQCRB     |
| CTCF | UQCRC1    |
| CTCF | UQCRC2    |
| CTCF | USF2      |
| CTCF | USF3      |
| CTCF | USP1      |
| CTCF | USP10     |
| CTCF | USP13     |
| CTCF | USP14     |
| CTCF | USP16     |
| CTCF | USP30-AS1 |
| CTCF | USP32     |
| CTCF | USP33     |
| CTCF | USP34     |
| CTCF | USP39     |
| CTCF | USP44     |
| CTCF | USP48     |
| CTCF | USP5      |
| CTCF | USP7      |
| CTCF | USP8      |
| CTCF | USPL1     |
| CTCF | UTP18     |
| CTCF | UTP6      |
| CTCF | UVRAG     |
| CTCF | UXT       |
| CTCF | VAMP8     |
| CTCF | VDAC3     |
| CTCF | VEZF1     |

|      |            |
|------|------------|
| CTCF | VGLL4      |
| CTCF | VIPAS39    |
| CTCF | VMP1       |
| CTCF | VPS11      |
| CTCF | VPS25      |
| CTCF | VPS26A     |
| CTCF | VPS26B     |
| CTCF | VPS35      |
| CTCF | VPS37C     |
| CTCF | VPS4B      |
| CTCF | VPS51      |
| CTCF | VPS72      |
| CTCF | VRK1       |
| CTCF | WAC        |
| CTCF | WAPL       |
| CTCF | WDFY4      |
| CTCF | WDR33      |
| CTCF | WDR34      |
| CTCF | WDR53      |
| CTCF | WDR61      |
| CTCF | WDR66      |
| CTCF | WDR70      |
| CTCF | WDR82      |
| CTCF | WIPI2      |
| CTCF | WNK1       |
| CTCF | WRAP53     |
| CTCF | WSB1       |
| CTCF | WWOX       |
| CTCF | WWP2       |
| CTCF | XRCC1      |
| CTCF | XRCC4      |
| CTCF | XRCC5      |
| CTCF | XRCC6      |
| CTCF | YEATS4     |
| CTCF | YIF1B      |
| CTCF | YIPF5      |
| CTCF | YLPM1      |
| CTCF | YPEL1      |
| CTCF | YPEL3      |
| CTCF | YWHAB      |
| CTCF | YWHAE      |
| CTCF | YWHAH      |
| CTCF | YWHAQ      |
| CTCF | YWHAZ      |
| CTCF | ZBED5-AS1  |
| CTCF | ZBTB10     |
| CTCF | ZBTB11-AS1 |
| CTCF | ZBTB2      |
| CTCF | ZBTB44     |
| CTCF | ZC3H12A    |

|      |         |
|------|---------|
| CTCF | ZC3H12D |
| CTCF | ZC3H13  |
| CTCF | ZC3H18  |
| CTCF | ZC3H6   |
| CTCF | ZC3HAV1 |
| CTCF | ZCCHC10 |
| CTCF | ZCCHC17 |
| CTCF | ZCCHC7  |
| CTCF | ZCCHC9  |
| CTCF | ZDHHC12 |
| CTCF | ZDHHC4  |
| CTCF | ZEB1    |
| CTCF | ZFAND2B |
| CTCF | ZFAND6  |
| CTCF | ZFHX3   |
| CTCF | ZFP82   |
| CTCF | ZFP91   |
| CTCF | ZFPL1   |
| CTCF | ZFR     |
| CTCF | ZFX     |
| CTCF | ZHX2    |
| CTCF | ZMYM4   |
| CTCF | ZMYND8  |
| CTCF | ZNF106  |
| CTCF | ZNF143  |
| CTCF | ZNF148  |
| CTCF | ZNF207  |
| CTCF | ZNF213  |
| CTCF | ZNF24   |
| CTCF | ZNF253  |
| CTCF | ZNF281  |
| CTCF | ZNF282  |
| CTCF | ZNF292  |
| CTCF | ZNF347  |
| CTCF | ZNF428  |
| CTCF | ZNF451  |
| CTCF | ZNF48   |
| CTCF | ZNF502  |
| CTCF | ZNF512  |
| CTCF | ZNF561  |
| CTCF | ZNF592  |
| CTCF | ZNF652  |
| CTCF | ZNF655  |
| CTCF | ZNF688  |
| CTCF | ZNF701  |
| CTCF | ZNF711  |
| CTCF | ZNF730  |
| CTCF | ZNF76   |
| CTCF | ZNF775  |
| CTCF | ZNF830  |

|      |          |
|------|----------|
| CTCF | ZNF831   |
| CTCF | ZNF880   |
| CTCF | ZSCAN16  |
| CTCF | ZWILCH   |
| CTCF | ZWINT    |
| CTCF | ZZEF1    |
| CUX1 | ABHD3    |
| CUX1 | ABI1     |
| CUX1 | ACAP2    |
| CUX1 | ACBD5    |
| CUX1 | ACTB     |
| CUX1 | ACTR2    |
| CUX1 | ACY3     |
| CUX1 | ADD3     |
| CUX1 | ADIPOR2  |
| CUX1 | AFMID    |
| CUX1 | ALOX5AP  |
| CUX1 | APLP2    |
| CUX1 | APOLD1   |
| CUX1 | APOPT1   |
| CUX1 | ARHGAP17 |
| CUX1 | ARID2    |
| CUX1 | ARID4B   |
| CUX1 | ARL3     |
| CUX1 | ARMC1    |
| CUX1 | ARPC1A   |
| CUX1 | ARPC3    |
| CUX1 | ASH1L    |
| CUX1 | ASH2L    |
| CUX1 | ATF1     |
| CUX1 | ATF7IP   |
| CUX1 | ATP10D   |
| CUX1 | ATP6V1C1 |
| CUX1 | BASP1    |
| CUX1 | BCL11A   |
| CUX1 | BCL3     |
| CUX1 | BCL6     |
| CUX1 | BCL7A    |
| CUX1 | BEX3     |
| CUX1 | BICD1    |
| CUX1 | BIRC3    |
| CUX1 | BPTF     |
| CUX1 | BRD4     |
| CUX1 | BRK1     |
| CUX1 | BRWD1    |
| CUX1 | BTG1     |
| CUX1 | C12orf65 |
| CUX1 | C19orf38 |
| CUX1 | C6orf48  |
| CUX1 | CALM2    |

|      |          |
|------|----------|
| CUX1 | CARHSP1  |
| CUX1 | CARMIL2  |
| CUX1 | CASC4    |
| CUX1 | CBX5     |
| CUX1 | CCDC171  |
| CUX1 | CCDC88C  |
| CUX1 | CCM2     |
| CUX1 | CCNB2    |
| CUX1 | CCND3    |
| CUX1 | CCNI     |
| CUX1 | CCNL1    |
| CUX1 | CD2AP    |
| CUX1 | CDC20    |
| CUX1 | CDC25B   |
| CUX1 | CDC42SE2 |
| CUX1 | CDK19    |
| CUX1 | CENPM    |
| CUX1 | CENPT    |
| CUX1 | CHD6     |
| CUX1 | CHD9     |
| CUX1 | CHTOP    |
| CUX1 | CHURC1   |
| CUX1 | CKAP5    |
| CUX1 | CLASP1   |
| CUX1 | CLTA     |
| CUX1 | COMMD7   |
| CUX1 | COR01A   |
| CUX1 | COR01B   |
| CUX1 | COX8A    |
| CUX1 | CPT1A    |
| CUX1 | CREB1    |
| CUX1 | CREBBP   |
| CUX1 | CRLF3    |
| CUX1 | CSK      |
| CUX1 | CUX1     |
| CUX1 | CXCR4    |
| CUX1 | CYB5R3   |
| CUX1 | DAAM1    |
| CUX1 | DAXX     |
| CUX1 | DAZAP2   |
| CUX1 | DCK      |
| CUX1 | DHDDS    |
| CUX1 | DNAJB6   |
| CUX1 | DNMBP    |
| CUX1 | DPF2     |
| CUX1 | DPY30    |
| CUX1 | DSTN     |
| CUX1 | DYNLL1   |
| CUX1 | EBF1     |
| CUX1 | ECT2     |

|      |            |
|------|------------|
| CUX1 | EEF2       |
| CUX1 | EHBP1      |
| CUX1 | EIF2AK1    |
| CUX1 | EIF3L      |
| CUX1 | EIF4EBP2   |
| CUX1 | EIF4H      |
| CUX1 | ELAVL1     |
| CUX1 | EPS15      |
| CUX1 | ERBIN      |
| CUX1 | ESYT2      |
| CUX1 | EYA3       |
| CUX1 | FAM102A    |
| CUX1 | FAM107B    |
| CUX1 | FAM129A    |
| CUX1 | FAM133B    |
| CUX1 | FAM200B    |
| CUX1 | FAM49B     |
| CUX1 | FANCA      |
| CUX1 | FBXL20     |
| CUX1 | FBX011     |
| CUX1 | FCH01      |
| CUX1 | FDFT1      |
| CUX1 | FLAD1      |
| CUX1 | FNBP1      |
| CUX1 | FXR2       |
| CUX1 | GABARAPL2  |
| CUX1 | GABPB1     |
| CUX1 | GABPB1-AS1 |
| CUX1 | GABPB2     |
| CUX1 | GATAD2A    |
| CUX1 | GBA        |
| CUX1 | GCHFR      |
| CUX1 | GFOD2      |
| CUX1 | GGA1       |
| CUX1 | GLG1       |
| CUX1 | GLYCTK     |
| CUX1 | GMEB1      |
| CUX1 | GNA13      |
| CUX1 | GNB1       |
| CUX1 | GPR160     |
| CUX1 | GSK3B      |
| CUX1 | H3F3A      |
| CUX1 | HAUS4      |
| CUX1 | HDAC1      |
| CUX1 | HDAC5      |
| CUX1 | HERC4      |
| CUX1 | HK1        |
| CUX1 | HMGB1      |
| CUX1 | HNRNPD     |
| CUX1 | HOPX       |

|      |            |
|------|------------|
| CUX1 | HP1BP3     |
| CUX1 | HRK        |
| CUX1 | IDE        |
| CUX1 | IFT81      |
| CUX1 | IGF2BP3    |
| CUX1 | IKZF3      |
| CUX1 | ING4       |
| CUX1 | IP6K2      |
| CUX1 | IQCD       |
| CUX1 | ITGB1      |
| CUX1 | JMJD1C     |
| CUX1 | KAT2B      |
| CUX1 | KDM3B      |
| CUX1 | KIAA1191   |
| CUX1 | KIF14      |
| CUX1 | KIF2C      |
| CUX1 | KIFC1      |
| CUX1 | KLC1       |
| CUX1 | KLF6       |
| CUX1 | KLHL20     |
| CUX1 | KLHL22     |
| CUX1 | KLHL24     |
| CUX1 | KLHL42     |
| CUX1 | KLHL5      |
| CUX1 | KMT2A      |
| CUX1 | LCK        |
| CUX1 | LCP1       |
| CUX1 | LHPP       |
| CUX1 | LINC01152  |
| CUX1 | LLGL1      |
| CUX1 | LM02       |
| CUX1 | LM04       |
| CUX1 | LPP        |
| CUX1 | LRBA       |
| CUX1 | LRRC37B    |
| CUX1 | MAD2L2     |
| CUX1 | MAP2K1     |
| CUX1 | MAP3K3     |
| CUX1 | MAPK14     |
| CUX1 | MBD2       |
| CUX1 | MBOAT2     |
| CUX1 | MED13      |
| CUX1 | MED25      |
| CUX1 | MEPCE      |
| CUX1 | METRNL     |
| CUX1 | MFSD13A    |
| CUX1 | MICAL3     |
| CUX1 | MIEN1      |
| CUX1 | MINK1      |
| CUX1 | MIR181A1HG |

|      |          |
|------|----------|
| CUX1 | MKRN1    |
| CUX1 | MPP5     |
| CUX1 | MRPS36   |
| CUX1 | MRPS6    |
| CUX1 | MSH6     |
| CUX1 | MTA3     |
| CUX1 | MVB12A   |
| CUX1 | MYBL2    |
| CUX1 | MYO1E    |
| CUX1 | MYP0P    |
| CUX1 | N4BP3    |
| CUX1 | NAP1L4   |
| CUX1 | NCOA3    |
| CUX1 | NELFB    |
| CUX1 | NF1      |
| CUX1 | NFYB     |
| CUX1 | NFYC     |
| CUX1 | NPAS1    |
| CUX1 | NR2C1    |
| CUX1 | NR3C1    |
| CUX1 | NUMB     |
| CUX1 | ODF2     |
| CUX1 | OPTN     |
| CUX1 | ORAI2    |
| CUX1 | OSBPL11  |
| CUX1 | OSBPL8   |
| CUX1 | OTUB1    |
| CUX1 | P2RX5    |
| CUX1 | PABPN1   |
| CUX1 | PAFAH1B3 |
| CUX1 | PAIP2    |
| CUX1 | PALD1    |
| CUX1 | PAN3     |
| CUX1 | PARP1    |
| CUX1 | PBRM1    |
| CUX1 | PCBD2    |
| CUX1 | PDPK1    |
| CUX1 | PFKFB3   |
| CUX1 | PHACTR2  |
| CUX1 | PIF1     |
| CUX1 | PIGV     |
| CUX1 | PIK3C2B  |
| CUX1 | PIP5K1A  |
| CUX1 | PITPNC1  |
| CUX1 | PKN0X1   |
| CUX1 | PLCG2    |
| CUX1 | PLEKHA2  |
| CUX1 | PLEKHM1  |
| CUX1 | PLIN3    |
| CUX1 | PNISR    |



|      |          |
|------|----------|
| CUX1 | POM121   |
| CUX1 | POP5     |
| CUX1 | POU3F1   |
| CUX1 | PPIL2    |
| CUX1 | PPP1R2   |
| CUX1 | PPP2R5C  |
| CUX1 | PPP3CC   |
| CUX1 | PPP4R2   |
| CUX1 | PRDX2    |
| CUX1 | PRPSAP2  |
| CUX1 | PRRC2B   |
| CUX1 | PTK2     |
| CUX1 | PTP4A2   |
| CUX1 | PTPN11   |
| CUX1 | PXK      |
| CUX1 | QARS     |
| CUX1 | QRICH1   |
| CUX1 | R3HDM2   |
| CUX1 | RAB11A   |
| CUX1 | RAB3GAP2 |
| CUX1 | RAB9A    |
| CUX1 | RABGAP1  |
| CUX1 | RAD21    |
| CUX1 | RB1CC1   |
| CUX1 | RBF0X2   |
| CUX1 | RBM23    |
| CUX1 | RBM6     |
| CUX1 | RCC1     |
| CUX1 | RCC2     |
| CUX1 | RCOR1    |
| CUX1 | REEP4    |
| CUX1 | RFTN1    |
| CUX1 | RHBDF2   |
| CUX1 | RHOA     |
| CUX1 | RH0H     |
| CUX1 | RNF169   |
| CUX1 | S1PR2    |
| CUX1 | SCARB1   |
| CUX1 | SCMH1    |
| CUX1 | SEC14L1  |
| CUX1 | SEL1L3   |
| CUX1 | SENP8    |
| CUX1 | SEPT6    |
| CUX1 | SERF2    |
| CUX1 | SETD9    |
| CUX1 | SH3KBP1  |
| CUX1 | SH3RF1   |
| CUX1 | SKA2     |
| CUX1 | SLC25A33 |
| CUX1 | SLF2     |

|      |           |
|------|-----------|
| CUX1 | SLMAP     |
| CUX1 | SMARCA4   |
| CUX1 | SMARCC1   |
| CUX1 | SMARCD2   |
| CUX1 | SMC04     |
| CUX1 | SMG6      |
| CUX1 | SMIM14    |
| CUX1 | SNAP23    |
| CUX1 | SND1-IT1  |
| CUX1 | SNTA1     |
| CUX1 | SNX10     |
| CUX1 | SNX15     |
| CUX1 | SNX24     |
| CUX1 | SP3       |
| CUX1 | SPATS2    |
| CUX1 | SPPL3     |
| CUX1 | SPTLC2    |
| CUX1 | SREK1     |
| CUX1 | SSBP3     |
| CUX1 | STAG3     |
| CUX1 | STARD7    |
| CUX1 | STAT5B    |
| CUX1 | STAU2     |
| CUX1 | STK10     |
| CUX1 | STK38     |
| CUX1 | STX16     |
| CUX1 | SUN2      |
| CUX1 | SYNC      |
| CUX1 | TADA2A    |
| CUX1 | TCF4      |
| CUX1 | TERF2     |
| CUX1 | TFDP2     |
| CUX1 | THAP11    |
| CUX1 | TIA1      |
| CUX1 | TICAM1    |
| CUX1 | TIFA      |
| CUX1 | TKT       |
| CUX1 | TMEM107   |
| CUX1 | TMP0      |
| CUX1 | TNFAIP8L1 |
| CUX1 | TNFRSF13C |
| CUX1 | TNK2      |
| CUX1 | TOMM20    |
| CUX1 | TPCN1     |
| CUX1 | TPX2      |
| CUX1 | TRAF3IP2  |
| CUX1 | TRAF5     |
| CUX1 | TRAFD1    |
| CUX1 | TRAK1     |
| CUX1 | TRIOBP    |

|       |         |
|-------|---------|
| CUX1  | TRIP4   |
| CUX1  | TRMT10A |
| CUX1  | TR0AP   |
| CUX1  | TRPC4AP |
| CUX1  | TSC22D1 |
| CUX1  | TSC22D3 |
| CUX1  | TTC9C   |
| CUX1  | TTI2    |
| CUX1  | TUBA1C  |
| CUX1  | TUBB3   |
| CUX1  | UBALD2  |
| CUX1  | UBC     |
| CUX1  | UBE2E1  |
| CUX1  | UBE2E3  |
| CUX1  | UBE2J1  |
| CUX1  | UBE2R2  |
| CUX1  | UBXN6   |
| CUX1  | UGP2    |
| CUX1  | UIMC1   |
| CUX1  | USF2    |
| CUX1  | USF3    |
| CUX1  | USP12   |
| CUX1  | USP34   |
| CUX1  | VGLL4   |
| CUX1  | VRK1    |
| CUX1  | WAPL    |
| CUX1  | WDR33   |
| CUX1  | WDR76   |
| CUX1  | WIPF1   |
| CUX1  | YPEL1   |
| CUX1  | YY1     |
| CUX1  | ZBTB80S |
| CUX1  | ZC3H14  |
| CUX1  | ZC3H6   |
| CUX1  | ZDHHC4  |
| CUX1  | ZFAND6  |
| CUX1  | ZMAT5   |
| CUX1  | ZMYND8  |
| CUX1  | ZNF106  |
| CUX1  | ZNF143  |
| CUX1  | ZNF428  |
| CUX1  | ZNF608  |
| CUX1  | ZNF638  |
| CUX1  | ZNF821  |
| DDIT3 | AARS    |
| DDIT3 | ABHD18  |
| DDIT3 | ACP5    |
| DDIT3 | AGPAT2  |
| DDIT3 | AKTIP   |
| DDIT3 | ANK1    |

|       |          |
|-------|----------|
| DDIT3 | ANKRD11  |
| DDIT3 | ARID5B   |
| DDIT3 | ARIH1    |
| DDIT3 | ASAH1    |
| DDIT3 | ASNS     |
| DDIT3 | ATF3     |
| DDIT3 | ATF5     |
| DDIT3 | BCL2     |
| DDIT3 | BTG1     |
| DDIT3 | CARS     |
| DDIT3 | CBX7     |
| DDIT3 | CCL3     |
| DDIT3 | CD63     |
| DDIT3 | CDIPT    |
| DDIT3 | CEBPB    |
| DDIT3 | CHAC1    |
| DDIT3 | CHD2     |
| DDIT3 | CREB5    |
| DDIT3 | DBP      |
| DDIT3 | DDIT3    |
| DDIT3 | DDIT4    |
| DDIT3 | DGAT2    |
| DDIT3 | DUSP10   |
| DDIT3 | EIF1     |
| DDIT3 | EIF2S2   |
| DDIT3 | EIF4EBP1 |
| DDIT3 | ELMSAN1  |
| DDIT3 | ENC1     |
| DDIT3 | ENTPD1   |
| DDIT3 | EPRS     |
| DDIT3 | FAM107B  |
| DDIT3 | FAM234A  |
| DDIT3 | FAM49A   |
| DDIT3 | FCER2    |
| DDIT3 | FTH1     |
| DDIT3 | GABARAP  |
| DDIT3 | GARS     |
| DDIT3 | GOT1     |
| DDIT3 | GTF3C2   |
| DDIT3 | HAX1     |
| DDIT3 | HDAC5    |
| DDIT3 | HERPUD1  |
| DDIT3 | HIPK3    |
| DDIT3 | HLA-DRB5 |
| DDIT3 | HSPA5    |
| DDIT3 | HSPA9    |
| DDIT3 | HVCN1    |
| DDIT3 | HYOU1    |
| DDIT3 | IARS     |
| DDIT3 | IRF2     |

|       |           |
|-------|-----------|
| DDIT3 | JARID2    |
| DDIT3 | KLF7      |
| DDIT3 | KLF9      |
| DDIT3 | KMT2E     |
| DDIT3 | LRMP      |
| DDIT3 | MFN2      |
| DDIT3 | MGAT5     |
| DDIT3 | MID1IP1   |
| DDIT3 | MIR3681HG |
| DDIT3 | MOSPD1    |
| DDIT3 | MTHFD2    |
| DDIT3 | MYC       |
| DDIT3 | NFE2L1    |
| DDIT3 | NFE2L2    |
| DDIT3 | NT5C3A    |
| DDIT3 | OSGIN2    |
| DDIT3 | PCK2      |
| DDIT3 | PDCD4     |
| DDIT3 | PHACTR1   |
| DDIT3 | PHC1      |
| DDIT3 | PHF12     |
| DDIT3 | PHF19     |
| DDIT3 | PHGDH     |
| DDIT3 | PNPLA8    |
| DDIT3 | PPP1R12C  |
| DDIT3 | PPT1      |
| DDIT3 | PSAT1     |
| DDIT3 | PTGS1     |
| DDIT3 | PYCR1     |
| DDIT3 | RHOBTB2   |
| DDIT3 | RMND5A    |
| DDIT3 | RPL9      |
| DDIT3 | RYBP      |
| DDIT3 | SARS      |
| DDIT3 | SDCBP     |
| DDIT3 | SEC62     |
| DDIT3 | SESN2     |
| DDIT3 | SHMT2     |
| DDIT3 | SLC16A7   |
| DDIT3 | SLC1A5    |
| DDIT3 | SLC38A1   |
| DDIT3 | SLC3A2    |
| DDIT3 | SLC6A9    |
| DDIT3 | SMIM10    |
| DDIT3 | SPRYD3    |
| DDIT3 | SRF       |
| DDIT3 | STARD3NL  |
| DDIT3 | STX11     |
| DDIT3 | STX3      |
| DDIT3 | SUSD6     |

|       |         |
|-------|---------|
| DDIT3 | TAB2    |
| DDIT3 | TBPL1   |
| DDIT3 | TES     |
| DDIT3 | TM6SF1  |
| DDIT3 | TMEM168 |
| DDIT3 | TRIB3   |
| DDIT3 | TSC22D3 |
| DDIT3 | TXNL1   |
| DDIT3 | UNKL    |
| DDIT3 | VEGFA   |
| DDIT3 | WARS    |
| DDIT3 | XAF1    |
| DDIT3 | YARS    |
| DDIT3 | ZFP36L1 |
| E2F1  | A4GALT  |
| E2F1  | AAAS    |
| E2F1  | AAK1    |
| E2F1  | ABHD10  |
| E2F1  | ABHD11  |
| E2F1  | ABHD14B |
| E2F1  | ABHD17B |
| E2F1  | ABHD3   |
| E2F1  | ABHD5   |
| E2F1  | ABI2    |
| E2F1  | ABI3    |
| E2F1  | ACAA2   |
| E2F1  | ACAP2   |
| E2F1  | ACAT2   |
| E2F1  | ACBD3   |
| E2F1  | ACBD4   |
| E2F1  | ACD     |
| E2F1  | ACER3   |
| E2F1  | ACOT8   |
| E2F1  | ACP1    |
| E2F1  | ACSS1   |
| E2F1  | ACTB    |
| E2F1  | ACTL6A  |
| E2F1  | ACTN4   |
| E2F1  | ACTR1B  |
| E2F1  | ACTR8   |
| E2F1  | ACYP1   |
| E2F1  | ADA     |
| E2F1  | ADAR    |
| E2F1  | ADAT1   |
| E2F1  | ADCK5   |
| E2F1  | ADH5    |
| E2F1  | ADI1    |
| E2F1  | ADK     |
| E2F1  | ADPRHL2 |
| E2F1  | ADRM1   |

|      |          |
|------|----------|
| E2F1 | ADSS     |
| E2F1 | AGBL5    |
| E2F1 | AGFG2    |
| E2F1 | AGPAT1   |
| E2F1 | AGPAT2   |
| E2F1 | AGPAT5   |
| E2F1 | AHCY     |
| E2F1 | AIFM2    |
| E2F1 | AIG1     |
| E2F1 | AIM2     |
| E2F1 | AK2      |
| E2F1 | AK3      |
| E2F1 | AKAP1    |
| E2F1 | AKIP1    |
| E2F1 | AKR1B1   |
| E2F1 | AKR7A2   |
| E2F1 | AKT1S1   |
| E2F1 | ALCAM    |
| E2F1 | ALDH16A1 |
| E2F1 | ALDH5A1  |
| E2F1 | ALDH7A1  |
| E2F1 | ALG10    |
| E2F1 | ALG2     |
| E2F1 | ALKBH2   |
| E2F1 | ALKBH4   |
| E2F1 | ANAPC11  |
| E2F1 | ANAPC15  |
| E2F1 | ANAPC5   |
| E2F1 | ANKH     |
| E2F1 | ANKRD10  |
| E2F1 | ANKRD26  |
| E2F1 | ANKRD27  |
| E2F1 | AN06     |
| E2F1 | ANP32A   |
| E2F1 | ANP32B   |
| E2F1 | ANP32E   |
| E2F1 | ANXA11   |
| E2F1 | ANXA2    |
| E2F1 | ANXA5    |
| E2F1 | AP1B1    |
| E2F1 | AP1S1    |
| E2F1 | AP2A1    |
| E2F1 | AP2A2    |
| E2F1 | AP2S1    |
| E2F1 | APAF1    |
| E2F1 | APEX2    |
| E2F1 | API5     |
| E2F1 | APIP     |
| E2F1 | APLP2    |
| E2F1 | APOM     |

|      |           |
|------|-----------|
| E2F1 | APOPT1    |
| E2F1 | APPL1     |
| E2F1 | APTR      |
| E2F1 | ARF3      |
| E2F1 | ARGLU1    |
| E2F1 | ARHGDIA   |
| E2F1 | ARHGDIB   |
| E2F1 | ARHGEF1   |
| E2F1 | ARHGEF9   |
| E2F1 | ARID1A    |
| E2F1 | ARL13B    |
| E2F1 | ARL3      |
| E2F1 | ARL6      |
| E2F1 | ARL6IP6   |
| E2F1 | ARMC6     |
| E2F1 | ARNTL2    |
| E2F1 | ARPC1A    |
| E2F1 | ARPC1B    |
| E2F1 | ARPC2     |
| E2F1 | ARPC3     |
| E2F1 | ARPC4     |
| E2F1 | ARPC5     |
| E2F1 | ARPC5L    |
| E2F1 | ARSK      |
| E2F1 | ARV1      |
| E2F1 | ASB1      |
| E2F1 | ASB16-AS1 |
| E2F1 | ASF1A     |
| E2F1 | ASF1B     |
| E2F1 | ASH2L     |
| E2F1 | ASL       |
| E2F1 | ASRGL1    |
| E2F1 | ATAD2     |
| E2F1 | ATAD3A    |
| E2F1 | ATAD5     |
| E2F1 | ATF2      |
| E2F1 | ATF7IP2   |
| E2F1 | ATG3      |
| E2F1 | ATM       |
| E2F1 | ATOX1     |
| E2F1 | ATP13A2   |
| E2F1 | ATP23     |
| E2F1 | ATP2A3    |
| E2F1 | ATP6V0D1  |
| E2F1 | ATPAF1    |
| E2F1 | ATXN10    |
| E2F1 | ATXN2     |
| E2F1 | AUH       |
| E2F1 | AUNIP     |
| E2F1 | AURKAIP1  |



|      |          |
|------|----------|
| E2F1 | AZIN1    |
| E2F1 | B3GALNT1 |
| E2F1 | B3GAT3   |
| E2F1 | B3GLCT   |
| E2F1 | B3GNT7   |
| E2F1 | BABAM1   |
| E2F1 | BAG2     |
| E2F1 | BAG5     |
| E2F1 | BAG6     |
| E2F1 | BANF1    |
| E2F1 | BANP     |
| E2F1 | BARD1    |
| E2F1 | BAX      |
| E2F1 | BAZ1A    |
| E2F1 | BAZ1B    |
| E2F1 | BBIP1    |
| E2F1 | BCAS2    |
| E2F1 | BCAT2    |
| E2F1 | BCKDHB   |
| E2F1 | BCL2L11  |
| E2F1 | BCL2L12  |
| E2F1 | BCL7A    |
| E2F1 | BCL7B    |
| E2F1 | BCL7C    |
| E2F1 | BID      |
| E2F1 | BIN3     |
| E2F1 | BLM      |
| E2F1 | BLMH     |
| E2F1 | BLOC1S1  |
| E2F1 | BLOC1S2  |
| E2F1 | BLOC1S6  |
| E2F1 | BLVRB    |
| E2F1 | BNIP3    |
| E2F1 | BNIP3L   |
| E2F1 | BOLA1    |
| E2F1 | BPHL     |
| E2F1 | BPNT1    |
| E2F1 | BPTF     |
| E2F1 | BRCA1    |
| E2F1 | BRCC3    |
| E2F1 | BRD2     |
| E2F1 | BRD3     |
| E2F1 | BRD4     |
| E2F1 | BRD7     |
| E2F1 | BRI3     |
| E2F1 | BRI3BP   |
| E2F1 | BRK1     |
| E2F1 | BTF3     |
| E2F1 | BTF3L4   |
| E2F1 | BTG3     |

|      |          |
|------|----------|
| E2F1 | BUB3     |
| E2F1 | BUD13    |
| E2F1 | BZW1     |
| E2F1 | C11orf58 |
| E2F1 | C12orf49 |
| E2F1 | C12orf57 |
| E2F1 | C12orf73 |
| E2F1 | C12orf75 |
| E2F1 | C15orf41 |
| E2F1 | C16orf74 |
| E2F1 | C16orf87 |
| E2F1 | C16orf95 |
| E2F1 | C17orf75 |
| E2F1 | C19orf25 |
| E2F1 | C19orf47 |
| E2F1 | C19orf48 |
| E2F1 | C19orf53 |
| E2F1 | C19orf54 |
| E2F1 | C1D      |
| E2F1 | C1GALT1  |
| E2F1 | C1orf123 |
| E2F1 | C1orf35  |
| E2F1 | C1orf50  |
| E2F1 | C21orf58 |
| E2F1 | C21orf91 |
| E2F1 | C2orf69  |
| E2F1 | C2orf88  |
| E2F1 | C3orf38  |
| E2F1 | C4orf33  |
| E2F1 | C4orf48  |
| E2F1 | C5orf24  |
| E2F1 | C6orf203 |
| E2F1 | C7orf50  |
| E2F1 | C8orf76  |
| E2F1 | C9orf16  |
| E2F1 | C9orf40  |
| E2F1 | C9orf78  |
| E2F1 | CAB39L   |
| E2F1 | CABLES2  |
| E2F1 | CACYBP   |
| E2F1 | CALM1    |
| E2F1 | CALM2    |
| E2F1 | CALM3    |
| E2F1 | CAMK2D   |
| E2F1 | CAMLG    |
| E2F1 | CAMTA1   |
| E2F1 | CAPN1    |
| E2F1 | CAPN10   |
| E2F1 | CAPN2    |
| E2F1 | CAPN7    |

|      |          |
|------|----------|
| E2F1 | CARD8    |
| E2F1 | CARHSP1  |
| E2F1 | CARM1    |
| E2F1 | CARNMT1  |
| E2F1 | CARS2    |
| E2F1 | CASP2    |
| E2F1 | CASP8AP2 |
| E2F1 | CBFB     |
| E2F1 | CBX1     |
| E2F1 | CBX2     |
| E2F1 | CBX3     |
| E2F1 | CBX5     |
| E2F1 | CCDC106  |
| E2F1 | CCDC136  |
| E2F1 | CCDC167  |
| E2F1 | CCDC189  |
| E2F1 | CCDC191  |
| E2F1 | CCDC34   |
| E2F1 | CCDC57   |
| E2F1 | CCDC58   |
| E2F1 | CCDC69   |
| E2F1 | CCDC85B  |
| E2F1 | CCND3    |
| E2F1 | CCNE1    |
| E2F1 | CCNE2    |
| E2F1 | CCNG2    |
| E2F1 | CCNI     |
| E2F1 | CCP110   |
| E2F1 | CCT2     |
| E2F1 | CCT8     |
| E2F1 | CD163L1  |
| E2F1 | CD2BP2   |
| E2F1 | CD70     |
| E2F1 | CD79B    |
| E2F1 | CD81     |
| E2F1 | CDADC1   |
| E2F1 | CDC123   |
| E2F1 | CDC34    |
| E2F1 | CDC37    |
| E2F1 | CDC42SE2 |
| E2F1 | CDC6     |
| E2F1 | CDC7     |
| E2F1 | CDCA4    |
| E2F1 | CDCA5    |
| E2F1 | CDCA7    |
| E2F1 | CDCA7L   |
| E2F1 | CDK11B   |
| E2F1 | CDK2     |
| E2F1 | CDK4     |
| E2F1 | CDK5     |

|      |            |
|------|------------|
| E2F1 | CDK6       |
| E2F1 | CDK9       |
| E2F1 | CDKN2AIP   |
| E2F1 | CDKN2AIPNL |
| E2F1 | CDPF1      |
| E2F1 | CDT1       |
| E2F1 | CEBPB      |
| E2F1 | CENPC      |
| E2F1 | CENPH      |
| E2F1 | CENPI      |
| E2F1 | CENPK      |
| E2F1 | CENPL      |
| E2F1 | CENPM      |
| E2F1 | CENPN      |
| E2F1 | CENPU      |
| E2F1 | CENPW      |
| E2F1 | CEP120     |
| E2F1 | CEP250     |
| E2F1 | CEP41      |
| E2F1 | CEP57      |
| E2F1 | CEP63      |
| E2F1 | CEP78      |
| E2F1 | CEP89      |
| E2F1 | CETN2      |
| E2F1 | CFAP20     |
| E2F1 | CFAP73     |
| E2F1 | CFL1       |
| E2F1 | CHAF1A     |
| E2F1 | CHAF1B     |
| E2F1 | CHCHD10    |
| E2F1 | CHCHD2     |
| E2F1 | CHCHD3     |
| E2F1 | CHCHD5     |
| E2F1 | CHD3       |
| E2F1 | CHD4       |
| E2F1 | CHD6       |
| E2F1 | CHD8       |
| E2F1 | CHEK1      |
| E2F1 | CHMP1A     |
| E2F1 | CHRAC1     |
| E2F1 | CHTF8      |
| E2F1 | CHTOP      |
| E2F1 | CIB1       |
| E2F1 | CIC        |
| E2F1 | CIRBP      |
| E2F1 | CKLF       |
| E2F1 | CLASRP     |
| E2F1 | CLDN23     |
| E2F1 | CLDND1     |
| E2F1 | CLEC11A    |

|      |         |
|------|---------|
| E2F1 | CLIC4   |
| E2F1 | CLNS1A  |
| E2F1 | CLPP    |
| E2F1 | CLSPN   |
| E2F1 | CLTA    |
| E2F1 | CLTB    |
| E2F1 | CLUAP1  |
| E2F1 | CMPK2   |
| E2F1 | CNBP    |
| E2F1 | CNKSR2  |
| E2F1 | CNN2    |
| E2F1 | CNNM3   |
| E2F1 | CN0T10  |
| E2F1 | CN0T11  |
| E2F1 | CN0T9   |
| E2F1 | CNP     |
| E2F1 | COA1    |
| E2F1 | COA5    |
| E2F1 | COCH    |
| E2F1 | COG4    |
| E2F1 | COMMD4  |
| E2F1 | COMMD7  |
| E2F1 | COMTD1  |
| E2F1 | COPG1   |
| E2F1 | COPS3   |
| E2F1 | COPS5   |
| E2F1 | COPS6   |
| E2F1 | COPS7A  |
| E2F1 | COQ10A  |
| E2F1 | COQ9    |
| E2F1 | COR01A  |
| E2F1 | COR01B  |
| E2F1 | COR07   |
| E2F1 | COTL1   |
| E2F1 | COX11   |
| E2F1 | COX14   |
| E2F1 | COX16   |
| E2F1 | COX17   |
| E2F1 | COX4I1  |
| E2F1 | COX5A   |
| E2F1 | COX5B   |
| E2F1 | COX6A1  |
| E2F1 | COX6B1  |
| E2F1 | COX6C   |
| E2F1 | COX7A2  |
| E2F1 | COX7A2L |
| E2F1 | COX7B   |
| E2F1 | COX7C   |
| E2F1 | COX8A   |
| E2F1 | CPSF3   |

|      |          |
|------|----------|
| E2F1 | CPSF6    |
| E2F1 | CRELD1   |
| E2F1 | CRY2     |
| E2F1 | CSE1L    |
| E2F1 | CSK      |
| E2F1 | CSNK1G2  |
| E2F1 | CSNK2B   |
| E2F1 | CSPP1    |
| E2F1 | CSRP1    |
| E2F1 | CSTF2    |
| E2F1 | CSTF2T   |
| E2F1 | CSTF3    |
| E2F1 | CTCF     |
| E2F1 | CTDNEP1  |
| E2F1 | CTDSP1   |
| E2F1 | CTH      |
| E2F1 | CTNNAL1  |
| E2F1 | CTNNBIP1 |
| E2F1 | CTPS1    |
| E2F1 | CTPS2    |
| E2F1 | CUEDC2   |
| E2F1 | CUL2     |
| E2F1 | CUL3     |
| E2F1 | CUL4B    |
| E2F1 | CUTA     |
| E2F1 | CWC27    |
| E2F1 | CXorf56  |
| E2F1 | CXXC5    |
| E2F1 | CYB5B    |
| E2F1 | CYB5R3   |
| E2F1 | CYBB     |
| E2F1 | CYC1     |
| E2F1 | CYFIP2   |
| E2F1 | CYP20A1  |
| E2F1 | CYP2U1   |
| E2F1 | CYSTM1   |
| E2F1 | D2HGDH   |
| E2F1 | DAAM1    |
| E2F1 | DAP      |
| E2F1 | DARS     |
| E2F1 | DAXX     |
| E2F1 | DAZAP1   |
| E2F1 | DBI      |
| E2F1 | DBNDD1   |
| E2F1 | DCAKD    |
| E2F1 | DCK      |
| E2F1 | DCLRE1B  |
| E2F1 | DCPS     |
| E2F1 | DCTN2    |
| E2F1 | DCTN3    |

|      |            |
|------|------------|
| E2F1 | DCTN5      |
| E2F1 | DCTPP1     |
| E2F1 | DCUN1D4    |
| E2F1 | DDB2       |
| E2F1 | DDHD1      |
| E2F1 | DDIT3      |
| E2F1 | DDT        |
| E2F1 | DDX11      |
| E2F1 | DDX24      |
| E2F1 | DDX39A     |
| E2F1 | DDX3X      |
| E2F1 | DDX41      |
| E2F1 | DDX46      |
| E2F1 | DDX55      |
| E2F1 | DEF8       |
| E2F1 | DEK        |
| E2F1 | DENND3     |
| E2F1 | DENND4B    |
| E2F1 | DESI2      |
| E2F1 | DGCR6L     |
| E2F1 | DGKA       |
| E2F1 | DGU0K      |
| E2F1 | DHCR24     |
| E2F1 | DHFR       |
| E2F1 | DHPS       |
| E2F1 | DHRS7B     |
| E2F1 | DHX15      |
| E2F1 | DHX9       |
| E2F1 | DIAPH3     |
| E2F1 | DICER1     |
| E2F1 | DLAT       |
| E2F1 | DLD        |
| E2F1 | DLG3       |
| E2F1 | DLGAP1-AS1 |
| E2F1 | DMC1       |
| E2F1 | DMD        |
| E2F1 | DMWD       |
| E2F1 | DNAJA3     |
| E2F1 | DNAJC10    |
| E2F1 | DNAJC15    |
| E2F1 | DNAJC8     |
| E2F1 | DNAJC9     |
| E2F1 | DNMT1      |
| E2F1 | DOK1       |
| E2F1 | DONSON     |
| E2F1 | DPCD       |
| E2F1 | DPY30      |
| E2F1 | DRG1       |
| E2F1 | DSN1       |
| E2F1 | DSTN       |

|      |           |
|------|-----------|
| E2F1 | DTX1      |
| E2F1 | DTYMK     |
| E2F1 | DUSP10    |
| E2F1 | DUSP23    |
| E2F1 | DUT       |
| E2F1 | DYM       |
| E2F1 | DYNC1H1   |
| E2F1 | DYNLT1    |
| E2F1 | E2F1      |
| E2F1 | E2F7      |
| E2F1 | E2F8      |
| E2F1 | EBP       |
| E2F1 | ECH1      |
| E2F1 | EED       |
| E2F1 | EEF1AKMT1 |
| E2F1 | EEF1B2    |
| E2F1 | EEF1D     |
| E2F1 | EEF1E1    |
| E2F1 | EEF1G     |
| E2F1 | EEF2      |
| E2F1 | EFHD2     |
| E2F1 | EFR3A     |
| E2F1 | EFTUD2    |
| E2F1 | EHD1      |
| E2F1 | EID1      |
| E2F1 | EID2B     |
| E2F1 | EIF1      |
| E2F1 | EIF1AX    |
| E2F1 | EIF2AK1   |
| E2F1 | EIF2AK2   |
| E2F1 | EIF2AK3   |
| E2F1 | EIF2B1    |
| E2F1 | EIF2D     |
| E2F1 | EIF2S3    |
| E2F1 | EIF3F     |
| E2F1 | EIF3H     |
| E2F1 | EIF3I     |
| E2F1 | EIF3K     |
| E2F1 | EIF3L     |
| E2F1 | EIF3M     |
| E2F1 | EIF4A3    |
| E2F1 | EIF4G2    |
| E2F1 | EIF4G3    |
| E2F1 | EIF4H     |
| E2F1 | EIF5A     |
| E2F1 | ELAC1     |
| E2F1 | ELAC2     |
| E2F1 | ELAVL1    |
| E2F1 | ELF1      |
| E2F1 | ELF4      |



|      |         |
|------|---------|
| E2F1 | ELK1    |
| E2F1 | ELL     |
| E2F1 | ELM02   |
| E2F1 | ELMSAN1 |
| E2F1 | ELOVL5  |
| E2F1 | ELP5    |
| E2F1 | ELP6    |
| E2F1 | EMC2    |
| E2F1 | EMC6    |
| E2F1 | EN02    |
| E2F1 | ENOPH1  |
| E2F1 | ENOSF1  |
| E2F1 | ENY2    |
| E2F1 | EPB41   |
| E2F1 | EPN1    |
| E2F1 | EPS15   |
| E2F1 | EPS8    |
| E2F1 | EPS8L2  |
| E2F1 | ERGIC1  |
| E2F1 | ERH     |
| E2F1 | ERI3    |
| E2F1 | ERICH1  |
| E2F1 | ERN1    |
| E2F1 | ER01A   |
| E2F1 | ERP29   |
| E2F1 | ESC01   |
| E2F1 | ESC02   |
| E2F1 | ESD     |
| E2F1 | ESPL1   |
| E2F1 | ETAA1   |
| E2F1 | ETFA    |
| E2F1 | ETFB    |
| E2F1 | EWSR1   |
| E2F1 | EX01    |
| E2F1 | EX0C5   |
| E2F1 | EX0SC1  |
| E2F1 | EX0SC2  |
| E2F1 | EX0SC3  |
| E2F1 | EX0SC6  |
| E2F1 | EX0SC8  |
| E2F1 | EX0SC9  |
| E2F1 | EYA3    |
| E2F1 | EZH2    |
| E2F1 | EZR     |
| E2F1 | FAAP20  |
| E2F1 | FADD    |
| E2F1 | FAHD2A  |
| E2F1 | FAM111A |
| E2F1 | FAM111B |
| E2F1 | FAM120A |

|      |           |
|------|-----------|
| E2F1 | FAM120A0S |
| E2F1 | FAM120C   |
| E2F1 | FAM167A   |
| E2F1 | FAM185A   |
| E2F1 | FAM192A   |
| E2F1 | FAM193B   |
| E2F1 | FAM221A   |
| E2F1 | FAM228B   |
| E2F1 | FAM49B    |
| E2F1 | FAM57A    |
| E2F1 | FAM76B    |
| E2F1 | FAM96A    |
| E2F1 | FANCA     |
| E2F1 | FANCB     |
| E2F1 | FANCI     |
| E2F1 | FANCL     |
| E2F1 | FANCM     |
| E2F1 | FAU       |
| E2F1 | FBL       |
| E2F1 | FBXL12    |
| E2F1 | FBXL4     |
| E2F1 | FBX011    |
| E2F1 | FBX022    |
| E2F1 | FBX04     |
| E2F1 | FBX043    |
| E2F1 | FBX05     |
| E2F1 | FDPS      |
| E2F1 | FDX1      |
| E2F1 | FEN1      |
| E2F1 | FGF14-AS2 |
| E2F1 | FGGY      |
| E2F1 | FH        |
| E2F1 | FIBP      |
| E2F1 | FIGNL1    |
| E2F1 | FIP1L1    |
| E2F1 | FKBP1A    |
| E2F1 | FKBP3     |
| E2F1 | FKBP8     |
| E2F1 | FLAD1     |
| E2F1 | FLOT1     |
| E2F1 | FLVCR1    |
| E2F1 | FLYWCH1   |
| E2F1 | FN3KRP    |
| E2F1 | FNIP1     |
| E2F1 | FNTA      |
| E2F1 | FOXM1     |
| E2F1 | FOXN3     |
| E2F1 | FOXRED2   |
| E2F1 | FRAT2     |
| E2F1 | FRG1      |

|      |            |
|------|------------|
| E2F1 | FRY-AS1    |
| E2F1 | FSD1L      |
| E2F1 | FUBP1      |
| E2F1 | FUS        |
| E2F1 | G3BP2      |
| E2F1 | G6PC3      |
| E2F1 | GABPB1-AS1 |
| E2F1 | GALE       |
| E2F1 | GALK1      |
| E2F1 | GALM       |
| E2F1 | GAMT       |
| E2F1 | GAPDH      |
| E2F1 | GBA        |
| E2F1 | GCH1       |
| E2F1 | GCHFR      |
| E2F1 | GDI2       |
| E2F1 | GEMIN6     |
| E2F1 | GEMIN8     |
| E2F1 | GFI1       |
| E2F1 | GFOD2      |
| E2F1 | GGCT       |
| E2F1 | GGH        |
| E2F1 | GGNBP2     |
| E2F1 | GID8       |
| E2F1 | GIN1       |
| E2F1 | GINS2      |
| E2F1 | GINS3      |
| E2F1 | GINS4      |
| E2F1 | GIT2       |
| E2F1 | GJC1       |
| E2F1 | GK         |
| E2F1 | GKAP1      |
| E2F1 | GLE1       |
| E2F1 | GL01       |
| E2F1 | GLRX2      |
| E2F1 | GLRX3      |
| E2F1 | GLRX5      |
| E2F1 | GLUL       |
| E2F1 | GMEB1      |
| E2F1 | GMNN       |
| E2F1 | GMPPB      |
| E2F1 | GMPR2      |
| E2F1 | GMPS       |
| E2F1 | GNA13      |
| E2F1 | GNAI2      |
| E2F1 | GNAS       |
| E2F1 | GNB1       |
| E2F1 | GNB2       |
| E2F1 | GNB5       |
| E2F1 | GNG5       |

|      |        |
|------|--------|
| E2F1 | GNL1   |
| E2F1 | GOT2   |
| E2F1 | GPAT4  |
| E2F1 | GPD2   |
| E2F1 | GPI    |
| E2F1 | GPN3   |
| E2F1 | GPR160 |
| E2F1 | GPS1   |
| E2F1 | GPX4   |
| E2F1 | GRK2   |
| E2F1 | GSDMD  |
| E2F1 | GSTO1  |
| E2F1 | GSTP1  |
| E2F1 | GSTZ1  |
| E2F1 | GTF2A2 |
| E2F1 | GTF2E2 |
| E2F1 | GTF2H1 |
| E2F1 | GTF2H5 |
| E2F1 | GTF2I  |
| E2F1 | GTPBP1 |
| E2F1 | GUCA1A |
| E2F1 | GUCD1  |
| E2F1 | GUK1   |
| E2F1 | GUSB   |
| E2F1 | GYG1   |
| E2F1 | GYPC   |
| E2F1 | H2AFV  |
| E2F1 | H2AFX  |
| E2F1 | H2AFY  |
| E2F1 | H2AFZ  |
| E2F1 | H3F3A  |
| E2F1 | HACD3  |
| E2F1 | HADH   |
| E2F1 | HADHA  |
| E2F1 | HAGHL  |
| E2F1 | HAT1   |
| E2F1 | HAUS1  |
| E2F1 | HAUS2  |
| E2F1 | HAUS4  |
| E2F1 | HAUS5  |
| E2F1 | HAUS6  |
| E2F1 | HAUS8  |
| E2F1 | HBS1L  |
| E2F1 | HCFC1  |
| E2F1 | HCG18  |
| E2F1 | HDAC1  |
| E2F1 | HDAC2  |
| E2F1 | HDDC2  |
| E2F1 | HDGF   |
| E2F1 | HDLBP  |

|      |           |
|------|-----------|
| E2F1 | HEBP2     |
| E2F1 | HELLS     |
| E2F1 | HENMT1    |
| E2F1 | HERC2     |
| E2F1 | HERC3     |
| E2F1 | HES6      |
| E2F1 | HGS       |
| E2F1 | HHEX      |
| E2F1 | HIGD1A    |
| E2F1 | HIGD2A    |
| E2F1 | HILPDA    |
| E2F1 | HINT1     |
| E2F1 | HINT2     |
| E2F1 | HIPK1     |
| E2F1 | HIST1H1B  |
| E2F1 | HIST1H1E  |
| E2F1 | HIST1H4C  |
| E2F1 | HK1       |
| E2F1 | HLA-DRB1  |
| E2F1 | HLCS      |
| E2F1 | HMG20A    |
| E2F1 | HMG20B    |
| E2F1 | HMGA1     |
| E2F1 | HMGB1     |
| E2F1 | HMGB2     |
| E2F1 | HMGN1     |
| E2F1 | HMGN2     |
| E2F1 | HMGN3     |
| E2F1 | HMGXB4    |
| E2F1 | HMOX2     |
| E2F1 | HNRNPA0   |
| E2F1 | HNRNPA1   |
| E2F1 | HNRNPA2B1 |
| E2F1 | HNRNPA3   |
| E2F1 | HNRNPAB   |
| E2F1 | HNRNPC    |
| E2F1 | HNRNPD    |
| E2F1 | HNRNPF    |
| E2F1 | HNRNPH3   |
| E2F1 | HNRNPK    |
| E2F1 | HNRNPL    |
| E2F1 | HNRNPM    |
| E2F1 | HNRNPR    |
| E2F1 | HNRNPU    |
| E2F1 | HPF1      |
| E2F1 | HPRT1     |
| E2F1 | HPS1      |
| E2F1 | HRK       |
| E2F1 | HS2ST1    |
| E2F1 | HSD17B10  |

|      |          |
|------|----------|
| E2F1 | HSD17B7  |
| E2F1 | HSDL1    |
| E2F1 | HSDL2    |
| E2F1 | HSP90AA1 |
| E2F1 | HSPB11   |
| E2F1 | HSPD1    |
| E2F1 | HTATSF1  |
| E2F1 | IAH1     |
| E2F1 | ICMT     |
| E2F1 | IDH2     |
| E2F1 | IDH3A    |
| E2F1 | IDH3B    |
| E2F1 | IDI1     |
| E2F1 | IER2     |
| E2F1 | IER3IP1  |
| E2F1 | IFI16    |
| E2F1 | IFI27L2  |
| E2F1 | IFNGR2   |
| E2F1 | IFNLR1   |
| E2F1 | IFT22    |
| E2F1 | IGBP1    |
| E2F1 | IGF2BP1  |
| E2F1 | IKBKG    |
| E2F1 | IL4R     |
| E2F1 | ILF3     |
| E2F1 | ILK      |
| E2F1 | ILVBL    |
| E2F1 | IMMT     |
| E2F1 | IMP4     |
| E2F1 | INAFM1   |
| E2F1 | INF2     |
| E2F1 | INIP     |
| E2F1 | IN080    |
| E2F1 | IN080C   |
| E2F1 | INPP1    |
| E2F1 | INTS10   |
| E2F1 | INTS8    |
| E2F1 | IP07     |
| E2F1 | IP09     |
| E2F1 | IQCB1    |
| E2F1 | IQCD     |
| E2F1 | IQGAP1   |
| E2F1 | IRAK4    |
| E2F1 | IRF8     |
| E2F1 | ISG20L2  |
| E2F1 | ISOC2    |
| E2F1 | ITGB3BP  |
| E2F1 | ITPR3    |
| E2F1 | ITSN2    |
| E2F1 | JADE2    |

|      |          |
|------|----------|
| E2F1 | JAML     |
| E2F1 | KANK1    |
| E2F1 | KAT6B    |
| E2F1 | KATNAL2  |
| E2F1 | KATNB1   |
| E2F1 | KCNK12   |
| E2F1 | KCNMB4   |
| E2F1 | KCTD20   |
| E2F1 | KEAP1    |
| E2F1 | KHDRBS1  |
| E2F1 | KHK      |
| E2F1 | KHSRP    |
| E2F1 | KIAA0040 |
| E2F1 | KIAA0355 |
| E2F1 | KIAA1586 |
| E2F1 | KIF13A   |
| E2F1 | KIF20A   |
| E2F1 | KIF22    |
| E2F1 | KIF2A    |
| E2F1 | KLC2     |
| E2F1 | KLHDC2   |
| E2F1 | KLHDC3   |
| E2F1 | KLHL18   |
| E2F1 | KLHL23   |
| E2F1 | KLHL25   |
| E2F1 | KLHL42   |
| E2F1 | KLHL7    |
| E2F1 | KPNB1    |
| E2F1 | KTN1     |
| E2F1 | KXD1     |
| E2F1 | KYAT1    |
| E2F1 | L2HGDH   |
| E2F1 | L3MBTL2  |
| E2F1 | LAGE3    |
| E2F1 | LAMP1    |
| E2F1 | LAMTOR2  |
| E2F1 | LAPTM4B  |
| E2F1 | LARP4B   |
| E2F1 | LAS1L    |
| E2F1 | LCMT1    |
| E2F1 | LCOR     |
| E2F1 | LCP1     |
| E2F1 | LDAH     |
| E2F1 | LDHA     |
| E2F1 | LDHB     |
| E2F1 | LETM2    |
| E2F1 | LETMD1   |
| E2F1 | LGALS8   |
| E2F1 | LGALS9   |
| E2F1 | LHPP     |

|      |           |
|------|-----------|
| E2F1 | LIG1      |
| E2F1 | LIMD2     |
| E2F1 | LIMS1     |
| E2F1 | LIMS2     |
| E2F1 | LIN9      |
| E2F1 | LINC00324 |
| E2F1 | LINC00426 |
| E2F1 | LINC01006 |
| E2F1 | LINC01224 |
| E2F1 | LINC01431 |
| E2F1 | LINC01481 |
| E2F1 | LINC01534 |
| E2F1 | LIPE-AS1  |
| E2F1 | LMBRD2    |
| E2F1 | LMCD1     |
| E2F1 | LMF2      |
| E2F1 | LMNB1     |
| E2F1 | LMNB2     |
| E2F1 | LNPEP     |
| E2F1 | LONP1     |
| E2F1 | LOXL2     |
| E2F1 | LRP8      |
| E2F1 | LRPPRC    |
| E2F1 | LRR1      |
| E2F1 | LRRC42    |
| E2F1 | LRRC45    |
| E2F1 | LRRC47    |
| E2F1 | LRRC57    |
| E2F1 | LRRC58    |
| E2F1 | LRRC61    |
| E2F1 | LSM14B    |
| E2F1 | LSM2      |
| E2F1 | LSM3      |
| E2F1 | LSM4      |
| E2F1 | LSM5      |
| E2F1 | LSM6      |
| E2F1 | LSM7      |
| E2F1 | LSM8      |
| E2F1 | LSP1      |
| E2F1 | LTBP4     |
| E2F1 | LUC7L2    |
| E2F1 | LUC7L3    |
| E2F1 | LYL1      |
| E2F1 | LYPLA1    |
| E2F1 | LYPLAL1   |
| E2F1 | LYRM1     |
| E2F1 | MAD1L1    |
| E2F1 | MAD2L1    |
| E2F1 | MAD2L2    |
| E2F1 | MAGEF1    |



|      |           |
|------|-----------|
| E2F1 | MAGEH1    |
| E2F1 | MAGOH     |
| E2F1 | MALT1     |
| E2F1 | MAML3     |
| E2F1 | MAN2A1    |
| E2F1 | MAP1LC3A  |
| E2F1 | MAP2      |
| E2F1 | MAP2K1    |
| E2F1 | MAP4K1    |
| E2F1 | MAP4K2    |
| E2F1 | MAP7D1    |
| E2F1 | MAPK1     |
| E2F1 | MAPK1IP1L |
| E2F1 | MAPK9     |
| E2F1 | MAPRE1    |
| E2F1 | MAPRE2    |
| E2F1 | MARCH2    |
| E2F1 | MARCKSL1  |
| E2F1 | MAST2     |
| E2F1 | MAT2B     |
| E2F1 | MAZ       |
| E2F1 | MBD4      |
| E2F1 | MCM2      |
| E2F1 | MCM3      |
| E2F1 | MCM4      |
| E2F1 | MCM5      |
| E2F1 | MCM6      |
| E2F1 | MCM7      |
| E2F1 | MCMBP     |
| E2F1 | MCOLN2    |
| E2F1 | MCPH1     |
| E2F1 | MCTS1     |
| E2F1 | MCUR1     |
| E2F1 | MDH1      |
| E2F1 | MDH2      |
| E2F1 | MDP1      |
| E2F1 | MEA1      |
| E2F1 | MED11     |
| E2F1 | MED25     |
| E2F1 | MED30     |
| E2F1 | MED31     |
| E2F1 | MED4      |
| E2F1 | MEIOC     |
| E2F1 | METAP1    |
| E2F1 | METAP2    |
| E2F1 | METTTL15  |
| E2F1 | METTTL21A |
| E2F1 | METTTL2B  |
| E2F1 | METTTL8   |
| E2F1 | METTTL9   |

|      |          |
|------|----------|
| E2F1 | MFAP1    |
| E2F1 | MFGE8    |
| E2F1 | MFHAS1   |
| E2F1 | MFNG     |
| E2F1 | MFSD11   |
| E2F1 | MFSD13A  |
| E2F1 | MFSD14B  |
| E2F1 | MGAT3    |
| E2F1 | MGAT4A   |
| E2F1 | MGME1    |
| E2F1 | MGMT     |
| E2F1 | MICU2    |
| E2F1 | MIDN     |
| E2F1 | MIEN1    |
| E2F1 | MIF      |
| E2F1 | MINCR    |
| E2F1 | MINOS1   |
| E2F1 | MIS18BP1 |
| E2F1 | MKL1     |
| E2F1 | MKNK2    |
| E2F1 | MKRN2    |
| E2F1 | MLLT10   |
| E2F1 | MLXIP    |
| E2F1 | MMAB     |
| E2F1 | MMADHC   |
| E2F1 | MME      |
| E2F1 | MMS22L   |
| E2F1 | MNAT1    |
| E2F1 | MND1     |
| E2F1 | MOB1A    |
| E2F1 | MOB1B    |
| E2F1 | MORF4L1  |
| E2F1 | MOSPD3   |
| E2F1 | MPC2     |
| E2F1 | MPDU1    |
| E2F1 | MPHOSPH6 |
| E2F1 | MRM2     |
| E2F1 | MRPL11   |
| E2F1 | MRPL13   |
| E2F1 | MRPL14   |
| E2F1 | MRPL15   |
| E2F1 | MRPL16   |
| E2F1 | MRPL18   |
| E2F1 | MRPL19   |
| E2F1 | MRPL20   |
| E2F1 | MRPL23   |
| E2F1 | MRPL27   |
| E2F1 | MRPL28   |
| E2F1 | MRPL34   |
| E2F1 | MRPL36   |

|      |         |
|------|---------|
| E2F1 | MRPL37  |
| E2F1 | MRPL39  |
| E2F1 | MRPL4   |
| E2F1 | MRPL48  |
| E2F1 | MRPL49  |
| E2F1 | MRPL51  |
| E2F1 | MRPL57  |
| E2F1 | MRPS15  |
| E2F1 | MRPS16  |
| E2F1 | MRPS18A |
| E2F1 | MRPS21  |
| E2F1 | MRPS26  |
| E2F1 | MRPS31  |
| E2F1 | MRPS33  |
| E2F1 | MRPS34  |
| E2F1 | MRPS36  |
| E2F1 | MRPS5   |
| E2F1 | MRPS6   |
| E2F1 | MRPS9   |
| E2F1 | MRS2    |
| E2F1 | MSH2    |
| E2F1 | MSH6    |
| E2F1 | MSL2    |
| E2F1 | MSRB2   |
| E2F1 | MTA2    |
| E2F1 | MTA3    |
| E2F1 | MTERF3  |
| E2F1 | MTF2    |
| E2F1 | MTFP1   |
| E2F1 | MTFR1   |
| E2F1 | MTFR1L  |
| E2F1 | MTHFD1  |
| E2F1 | MTHFD2  |
| E2F1 | MTHFD2L |
| E2F1 | MTMR12  |
| E2F1 | MTURN   |
| E2F1 | MTX1    |
| E2F1 | MUT     |
| E2F1 | MUTYH   |
| E2F1 | MVD     |
| E2F1 | MXD3    |
| E2F1 | MYBL2   |
| E2F1 | MYCBP   |
| E2F1 | MYH9    |
| E2F1 | MYL12A  |
| E2F1 | MYL6    |
| E2F1 | MYL6B   |
| E2F1 | MYO1C   |
| E2F1 | MYO1G   |
| E2F1 | MYO9A   |

|      |         |
|------|---------|
| E2F1 | MZT1    |
| E2F1 | MZT2A   |
| E2F1 | MZT2B   |
| E2F1 | N4BP2   |
| E2F1 | N4BP3   |
| E2F1 | NAA16   |
| E2F1 | NAA38   |
| E2F1 | NAA40   |
| E2F1 | NAA50   |
| E2F1 | NABP2   |
| E2F1 | NACA    |
| E2F1 | NACC1   |
| E2F1 | NADK    |
| E2F1 | NAE1    |
| E2F1 | NANS    |
| E2F1 | NAP1L1  |
| E2F1 | NAP1L4  |
| E2F1 | NARFL   |
| E2F1 | NARS2   |
| E2F1 | NASP    |
| E2F1 | NBEAL1  |
| E2F1 | NCBP1   |
| E2F1 | NCBP3   |
| E2F1 | NCF4    |
| E2F1 | NDUFA1  |
| E2F1 | NDUFA11 |
| E2F1 | NDUFA12 |
| E2F1 | NDUFA13 |
| E2F1 | NDUFA3  |
| E2F1 | NDUFA4  |
| E2F1 | NDUFA6  |
| E2F1 | NDUFA8  |
| E2F1 | NDUFAB1 |
| E2F1 | NDUFAF6 |
| E2F1 | NDUFAF7 |
| E2F1 | NDUFB10 |
| E2F1 | NDUFB11 |
| E2F1 | NDUFB2  |
| E2F1 | NDUFB3  |
| E2F1 | NDUFB5  |
| E2F1 | NDUFB6  |
| E2F1 | NDUFB8  |
| E2F1 | NDUFC1  |
| E2F1 | NDUFS3  |
| E2F1 | NDUFS4  |
| E2F1 | NDUFS5  |
| E2F1 | NDUFS6  |
| E2F1 | NDUFS7  |
| E2F1 | NDUFS8  |
| E2F1 | NDUFV1  |

|      |         |
|------|---------|
| E2F1 | NDUFV2  |
| E2F1 | NEDD1   |
| E2F1 | NEDD8   |
| E2F1 | NEIL1   |
| E2F1 | NELFA   |
| E2F1 | NELFB   |
| E2F1 | NEMP2   |
| E2F1 | NENF    |
| E2F1 | NET1    |
| E2F1 | NETO2   |
| E2F1 | NF1     |
| E2F1 | NF2     |
| E2F1 | NFYB    |
| E2F1 | NHLRC3  |
| E2F1 | NINJ1   |
| E2F1 | NIP7    |
| E2F1 | NIPBL   |
| E2F1 | NKTR    |
| E2F1 | NLK     |
| E2F1 | NLRC3   |
| E2F1 | NMI     |
| E2F1 | NMRAL1  |
| E2F1 | NNT-AS1 |
| E2F1 | NOA1    |
| E2F1 | NOL9    |
| E2F1 | NOM1    |
| E2F1 | NONO    |
| E2F1 | NOP56   |
| E2F1 | NORAD   |
| E2F1 | NPEPL1  |
| E2F1 | NPEPPS  |
| E2F1 | NPHP3   |
| E2F1 | NPTX2   |
| E2F1 | NQ01    |
| E2F1 | NQ02    |
| E2F1 | NR4A1   |
| E2F1 | NRAV    |
| E2F1 | NRDE2   |
| E2F1 | NSL1    |
| E2F1 | NSMCE1  |
| E2F1 | NSUN2   |
| E2F1 | NSUN5   |
| E2F1 | NSUN6   |
| E2F1 | NT5DC1  |
| E2F1 | NTAN1   |
| E2F1 | NTMT1   |
| E2F1 | NUBP1   |
| E2F1 | NUBP2   |
| E2F1 | NUCKS1  |
| E2F1 | NUDC    |

|      |          |
|------|----------|
| E2F1 | NUDT1    |
| E2F1 | NUDT15   |
| E2F1 | NUDT21   |
| E2F1 | NUDT5    |
| E2F1 | NUDT8    |
| E2F1 | NUP133   |
| E2F1 | NUP153   |
| E2F1 | NUP155   |
| E2F1 | NUP188   |
| E2F1 | NUP205   |
| E2F1 | NUP210   |
| E2F1 | NUP43    |
| E2F1 | NUP50    |
| E2F1 | NUP62    |
| E2F1 | NUP85    |
| E2F1 | NVL      |
| E2F1 | OAZ1     |
| E2F1 | OCIAD2   |
| E2F1 | OCLN     |
| E2F1 | OFD1     |
| E2F1 | OGFRL1   |
| E2F1 | OGG1     |
| E2F1 | OLA1     |
| E2F1 | OPA3     |
| E2F1 | ORAI2    |
| E2F1 | ORA0V1   |
| E2F1 | ORC6     |
| E2F1 | OSBPL10  |
| E2F1 | OSBPL2   |
| E2F1 | OSBPL3   |
| E2F1 | OSBPL8   |
| E2F1 | OSER1    |
| E2F1 | OSTM1    |
| E2F1 | OTUD6B   |
| E2F1 | OXCT1    |
| E2F1 | P2RX5    |
| E2F1 | P4HA2    |
| E2F1 | P4HTM    |
| E2F1 | PA2G4    |
| E2F1 | PAAF1    |
| E2F1 | PAC SIN1 |
| E2F1 | PAFAH1B1 |
| E2F1 | PAFAH1B3 |
| E2F1 | PAG1     |
| E2F1 | PAGR1    |
| E2F1 | PAICS    |
| E2F1 | PAIP2    |
| E2F1 | PALB2    |
| E2F1 | PANK2    |
| E2F1 | PANK4    |

|      |            |
|------|------------|
| E2F1 | PAQR4      |
| E2F1 | PARK7      |
| E2F1 | PARN       |
| E2F1 | PARP1      |
| E2F1 | PARP16     |
| E2F1 | PARP2      |
| E2F1 | PATL1      |
| E2F1 | PAWR       |
| E2F1 | PAX5       |
| E2F1 | PAXBP1     |
| E2F1 | PAXIP1-AS1 |
| E2F1 | PBK        |
| E2F1 | PBLD       |
| E2F1 | PBRM1      |
| E2F1 | PBX3       |
| E2F1 | PCBD1      |
| E2F1 | PCBP1      |
| E2F1 | PCCB       |
| E2F1 | PCED1B     |
| E2F1 | PCIF1      |
| E2F1 | PCMT1      |
| E2F1 | PCNA       |
| E2F1 | PCNP       |
| E2F1 | PCY0X1L    |
| E2F1 | PCYT2      |
| E2F1 | PDAP1      |
| E2F1 | PDE9A      |
| E2F1 | PDK2       |
| E2F1 | PDK3       |
| E2F1 | PDLIM1     |
| E2F1 | PDPK1      |
| E2F1 | PDPR       |
| E2F1 | PDS5A      |
| E2F1 | PEA15      |
| E2F1 | PEBP1      |
| E2F1 | PELO       |
| E2F1 | PELP1      |
| E2F1 | PEX16      |
| E2F1 | PEX26      |
| E2F1 | PFKFB3     |
| E2F1 | PFKL       |
| E2F1 | PFKP       |
| E2F1 | PFN1       |
| E2F1 | PFN2       |
| E2F1 | PGAM1      |
| E2F1 | PGAP2      |
| E2F1 | PGD        |
| E2F1 | PGK1       |
| E2F1 | PGLS       |
| E2F1 | PGM3       |

|      |            |
|------|------------|
| E2F1 | PGP        |
| E2F1 | PGRMC1     |
| E2F1 | PHB2       |
| E2F1 | PHF10      |
| E2F1 | PHF13      |
| E2F1 | PHF20      |
| E2F1 | PHF5A      |
| E2F1 | PHIP       |
| E2F1 | PHKG2      |
| E2F1 | PHOSPH02   |
| E2F1 | PHPT1      |
| E2F1 | PIAS4      |
| E2F1 | PIEZ01     |
| E2F1 | PIGL       |
| E2F1 | PIG0       |
| E2F1 | PIH1D1     |
| E2F1 | PIN1       |
| E2F1 | PITPNA     |
| E2F1 | PITPNA-AS1 |
| E2F1 | PKD2       |
| E2F1 | PKIA       |
| E2F1 | PKM        |
| E2F1 | PKMYT1     |
| E2F1 | PKN0X1     |
| E2F1 | PLA2G15    |
| E2F1 | PLEKHA3    |
| E2F1 | PLEKHF2    |
| E2F1 | PLEKHH3    |
| E2F1 | PLEKHJ1    |
| E2F1 | PLK4       |
| E2F1 | PLXNB2     |
| E2F1 | PM20D1     |
| E2F1 | PMF1       |
| E2F1 | PMM1       |
| E2F1 | PMPCB      |
| E2F1 | PMVK       |
| E2F1 | PNKD       |
| E2F1 | PNN        |
| E2F1 | PNP        |
| E2F1 | PNPLA4     |
| E2F1 | POFUT1     |
| E2F1 | POLA2      |
| E2F1 | POLD1      |
| E2F1 | POLD3      |
| E2F1 | POLDIP3    |
| E2F1 | POLE       |
| E2F1 | POLE3      |
| E2F1 | POLE4      |
| E2F1 | POLM       |
| E2F1 | POLR1D     |



|      |          |
|------|----------|
| E2F1 | P0LR2C   |
| E2F1 | P0LR2D   |
| E2F1 | P0LR2E   |
| E2F1 | P0LR2F   |
| E2F1 | P0LR2I   |
| E2F1 | P0LR2J   |
| E2F1 | P0LR2K   |
| E2F1 | P0LR2L   |
| E2F1 | POMP     |
| E2F1 | POP5     |
| E2F1 | POP7     |
| E2F1 | POU2AF1  |
| E2F1 | PPA1     |
| E2F1 | PPA2     |
| E2F1 | PPARA    |
| E2F1 | PPAT     |
| E2F1 | PPDPF    |
| E2F1 | PPIA     |
| E2F1 | PPIE     |
| E2F1 | PPIG     |
| E2F1 | PPIH     |
| E2F1 | PPIL3    |
| E2F1 | PPM1D    |
| E2F1 | PPM1G    |
| E2F1 | PPM1L    |
| E2F1 | PPP1CA   |
| E2F1 | PPP1CB   |
| E2F1 | PPP1R16B |
| E2F1 | PPP1R2   |
| E2F1 | PPP1R35  |
| E2F1 | PPP1R7   |
| E2F1 | PPP2CA   |
| E2F1 | PPP2R1A  |
| E2F1 | PPP2R2D  |
| E2F1 | PPP2R3C  |
| E2F1 | PPP2R5C  |
| E2F1 | PPP3R1   |
| E2F1 | PPP4C    |
| E2F1 | PPP6C    |
| E2F1 | PPP6R1   |
| E2F1 | PRADC1   |
| E2F1 | PRDM15   |
| E2F1 | PRDX2    |
| E2F1 | PRDX3    |
| E2F1 | PRDX5    |
| E2F1 | PRDX6    |
| E2F1 | PRELID1  |
| E2F1 | PRELID3A |
| E2F1 | PRELID3B |
| E2F1 | PRIM1    |

|      |         |
|------|---------|
| E2F1 | PRIMPOL |
| E2F1 | PRKACB  |
| E2F1 | PRKAR2A |
| E2F1 | PRKCE   |
| E2F1 | PRKDC   |
| E2F1 | PRMT7   |
| E2F1 | PRMT9   |
| E2F1 | PRPF19  |
| E2F1 | PRPF38A |
| E2F1 | PRPF40A |
| E2F1 | PRPF4B  |
| E2F1 | PRPS1   |
| E2F1 | PRPS2   |
| E2F1 | PRPSAP2 |
| E2F1 | PRR3    |
| E2F1 | PRR7    |
| E2F1 | PRRC2B  |
| E2F1 | PSIP1   |
| E2F1 | PSMA2   |
| E2F1 | PSMA3   |
| E2F1 | PSMA4   |
| E2F1 | PSMA5   |
| E2F1 | PSMA8   |
| E2F1 | PSMB1   |
| E2F1 | PSMB2   |
| E2F1 | PSMB3   |
| E2F1 | PSMB4   |
| E2F1 | PSMB5   |
| E2F1 | PSMB8   |
| E2F1 | PSMB9   |
| E2F1 | PSMC3   |
| E2F1 | PSMC3IP |
| E2F1 | PSMC5   |
| E2F1 | PSMD12  |
| E2F1 | PSMD14  |
| E2F1 | PSMD2   |
| E2F1 | PSMD6   |
| E2F1 | PSMD9   |
| E2F1 | PSMG1   |
| E2F1 | PSMG2   |
| E2F1 | PTAFR   |
| E2F1 | PTBP1   |
| E2F1 | PTBP3   |
| E2F1 | PTDSS1  |
| E2F1 | PTEN    |
| E2F1 | PTGES3  |
| E2F1 | PTMA    |
| E2F1 | PTOV1   |
| E2F1 | PTP4A1  |
| E2F1 | PTPN18  |

|      |           |
|------|-----------|
| E2F1 | PTPN9     |
| E2F1 | PTS       |
| E2F1 | PUDP      |
| E2F1 | PWWP2A    |
| E2F1 | PXK       |
| E2F1 | PXMP2     |
| E2F1 | PYM1      |
| E2F1 | QARS      |
| E2F1 | QSER1     |
| E2F1 | RAB11A    |
| E2F1 | RAB14     |
| E2F1 | RAB27A    |
| E2F1 | RAB28     |
| E2F1 | RAB2B     |
| E2F1 | RAB4A     |
| E2F1 | RAB8A     |
| E2F1 | RABGAP1L  |
| E2F1 | RABIF     |
| E2F1 | RABL6     |
| E2F1 | RAC1      |
| E2F1 | RACK1     |
| E2F1 | RAD1      |
| E2F1 | RAD18     |
| E2F1 | RAD23A    |
| E2F1 | RAD23B    |
| E2F1 | RAD51C    |
| E2F1 | RAD9A     |
| E2F1 | RAE1      |
| E2F1 | RAF1      |
| E2F1 | RALGAPA2  |
| E2F1 | RALY      |
| E2F1 | RAN       |
| E2F1 | RANBP1    |
| E2F1 | RANBP10   |
| E2F1 | RANBP3    |
| E2F1 | RANGRF    |
| E2F1 | RAP1B     |
| E2F1 | RAP2B     |
| E2F1 | RAPGEF5   |
| E2F1 | RASSF1    |
| E2F1 | RASSF3    |
| E2F1 | RBBP4     |
| E2F1 | RBBP7     |
| E2F1 | RBM10     |
| E2F1 | RBM14     |
| E2F1 | RBM17     |
| E2F1 | RBM26-AS1 |
| E2F1 | RBM28     |
| E2F1 | RBM3      |
| E2F1 | RBM38     |

|      |            |
|------|------------|
| E2F1 | RBM4       |
| E2F1 | RBM8A      |
| E2F1 | RBMX       |
| E2F1 | RBMX2      |
| E2F1 | RBPJ       |
| E2F1 | RBX1       |
| E2F1 | RCC1       |
| E2F1 | RCC1L      |
| E2F1 | RCC2       |
| E2F1 | RCCD1      |
| E2F1 | RCN2       |
| E2F1 | RDH5       |
| E2F1 | RDX        |
| E2F1 | RECQL      |
| E2F1 | RECQL4     |
| E2F1 | REV1       |
| E2F1 | REV3L      |
| E2F1 | RFC1       |
| E2F1 | RFC2       |
| E2F1 | RFC3       |
| E2F1 | RFC4       |
| E2F1 | RFTN1      |
| E2F1 | RFWD3      |
| E2F1 | RFX2       |
| E2F1 | RFX3       |
| E2F1 | RGCC       |
| E2F1 | RGS10      |
| E2F1 | RGS12      |
| E2F1 | RGS13      |
| E2F1 | RGS19      |
| E2F1 | RGS20      |
| E2F1 | RGS9       |
| E2F1 | RHN01      |
| E2F1 | RIC8A      |
| E2F1 | RIC8B      |
| E2F1 | RIF1       |
| E2F1 | RING1      |
| E2F1 | RMI1       |
| E2F1 | RMI2       |
| E2F1 | RMND5A     |
| E2F1 | RNASEH1    |
| E2F1 | RNASEH2A   |
| E2F1 | RNASEH2B   |
| E2F1 | RNASEH2C   |
| E2F1 | RNF123     |
| E2F1 | RNF126     |
| E2F1 | RNF139-AS1 |
| E2F1 | RNF144B    |
| E2F1 | RNF168     |
| E2F1 | RNF170     |

|      |         |
|------|---------|
| E2F1 | RNF2    |
| E2F1 | RNF212  |
| E2F1 | RNF32   |
| E2F1 | RNF34   |
| E2F1 | RNF38   |
| E2F1 | RNPS1   |
| E2F1 | ROCK2   |
| E2F1 | ROM01   |
| E2F1 | RPA1    |
| E2F1 | RPA2    |
| E2F1 | RPA3    |
| E2F1 | RPAIN   |
| E2F1 | RPE     |
| E2F1 | RPIA    |
| E2F1 | RPL10A  |
| E2F1 | RPL11   |
| E2F1 | RPL12   |
| E2F1 | RPL13A  |
| E2F1 | RPL14   |
| E2F1 | RPL15   |
| E2F1 | RPL17   |
| E2F1 | RPL19   |
| E2F1 | RPL21   |
| E2F1 | RPL22   |
| E2F1 | RPL23   |
| E2F1 | RPL23A  |
| E2F1 | RPL24   |
| E2F1 | RPL26   |
| E2F1 | RPL26L1 |
| E2F1 | RPL27   |
| E2F1 | RPL27A  |
| E2F1 | RPL28   |
| E2F1 | RPL29   |
| E2F1 | RPL3    |
| E2F1 | RPL30   |
| E2F1 | RPL35   |
| E2F1 | RPL36   |
| E2F1 | RPL36A  |
| E2F1 | RPL37   |
| E2F1 | RPL37A  |
| E2F1 | RPL38   |
| E2F1 | RPL4    |
| E2F1 | RPL41   |
| E2F1 | RPL5    |
| E2F1 | RPL6    |
| E2F1 | RPL7    |
| E2F1 | RPL8    |
| E2F1 | RPLP0   |
| E2F1 | RPP25   |
| E2F1 | RPP30   |

|      |          |
|------|----------|
| E2F1 | RPRD1B   |
| E2F1 | RPS10    |
| E2F1 | RPS11    |
| E2F1 | RPS13    |
| E2F1 | RPS14    |
| E2F1 | RPS15    |
| E2F1 | RPS15A   |
| E2F1 | RPS16    |
| E2F1 | RPS17    |
| E2F1 | RPS18    |
| E2F1 | RPS19    |
| E2F1 | RPS19BP1 |
| E2F1 | RPS2     |
| E2F1 | RPS20    |
| E2F1 | RPS21    |
| E2F1 | RPS23    |
| E2F1 | RPS24    |
| E2F1 | RPS25    |
| E2F1 | RPS26    |
| E2F1 | RPS27A   |
| E2F1 | RPS3     |
| E2F1 | RPS3A    |
| E2F1 | RPS4X    |
| E2F1 | RPS5     |
| E2F1 | RPS6     |
| E2F1 | RPS6KA4  |
| E2F1 | RPS7     |
| E2F1 | RPS8     |
| E2F1 | RPS9     |
| E2F1 | RPSA     |
| E2F1 | RPUSD1   |
| E2F1 | RRAS2    |
| E2F1 | RRM1     |
| E2F1 | RRM2     |
| E2F1 | RRP7A    |
| E2F1 | RSL1D1   |
| E2F1 | RSPH3    |
| E2F1 | RTCB     |
| E2F1 | RTF1     |
| E2F1 | RTN3     |
| E2F1 | RTN4     |
| E2F1 | RUFY2    |
| E2F1 | RUSC1    |
| E2F1 | RWDD2B   |
| E2F1 | S100A10  |
| E2F1 | S100PBP  |
| E2F1 | SAAL1    |
| E2F1 | SAC3D1   |
| E2F1 | SAE1     |
| E2F1 | SAMD10   |

|      |        |
|------|--------|
| E2F1 | SAP30  |
| E2F1 | SARS2  |
| E2F1 | SART3  |
| E2F1 | SASH3  |
| E2F1 | SBF1   |
| E2F1 | SC5D   |
| E2F1 | SCAF4  |
| E2F1 | SCAND1 |
| E2F1 | SCARB1 |
| E2F1 | SCCPDH |
| E2F1 | SCP2   |
| E2F1 | SCRN1  |
| E2F1 | SCYL2  |
| E2F1 | SDF2L1 |
| E2F1 | SDHA   |
| E2F1 | SDHAF1 |
| E2F1 | SDHAF2 |
| E2F1 | SDHAF3 |
| E2F1 | SDHB   |
| E2F1 | SDHC   |
| E2F1 | SEC11A |
| E2F1 | SEC22C |
| E2F1 | SEC23B |
| E2F1 | SEPHS1 |
| E2F1 | SEPHS2 |
| E2F1 | SEPT1  |
| E2F1 | SEPT11 |
| E2F1 | SEPT9  |
| E2F1 | SERBP1 |
| E2F1 | SERF2  |
| E2F1 | SERP2  |
| E2F1 | SESTD1 |
| E2F1 | SET    |
| E2F1 | SETD3  |
| E2F1 | SETD4  |
| E2F1 | SETD6  |
| E2F1 | SETD7  |
| E2F1 | SF1    |
| E2F1 | SF3A1  |
| E2F1 | SF3A2  |
| E2F1 | SF3A3  |
| E2F1 | SF3B2  |
| E2F1 | SF3B3  |
| E2F1 | SF3B4  |
| E2F1 | SF3B5  |
| E2F1 | SF3B6  |
| E2F1 | SFMBT1 |
| E2F1 | SGCE   |
| E2F1 | SGF29  |
| E2F1 | SGPP2  |

|      |          |
|------|----------|
| E2F1 | SH2B2    |
| E2F1 | SH3KBP1  |
| E2F1 | SH3TC1   |
| E2F1 | SHARPIN  |
| E2F1 | SHMT1    |
| E2F1 | SIMC1    |
| E2F1 | SIN3A    |
| E2F1 | SIPA1    |
| E2F1 | SIRT7    |
| E2F1 | SIVA1    |
| E2F1 | SKA2     |
| E2F1 | SKP1     |
| E2F1 | SLBP     |
| E2F1 | SLC10A3  |
| E2F1 | SLC15A4  |
| E2F1 | SLC16A1  |
| E2F1 | SLC16A4  |
| E2F1 | SLC16A7  |
| E2F1 | SLC1A4   |
| E2F1 | SLC1A5   |
| E2F1 | SLC25A1  |
| E2F1 | SLC25A10 |
| E2F1 | SLC25A11 |
| E2F1 | SLC25A19 |
| E2F1 | SLC25A26 |
| E2F1 | SLC25A3  |
| E2F1 | SLC25A4  |
| E2F1 | SLC25A40 |
| E2F1 | SLC25A5  |
| E2F1 | SLC25A53 |
| E2F1 | SLC2A11  |
| E2F1 | SLC2A5   |
| E2F1 | SLC30A4  |
| E2F1 | SLC30A5  |
| E2F1 | SLC35B4  |
| E2F1 | SLC35F5  |
| E2F1 | SLC38A9  |
| E2F1 | SLC39A1  |
| E2F1 | SLC6A6   |
| E2F1 | SLC6A9   |
| E2F1 | SLC7A5   |
| E2F1 | SLC9A3   |
| E2F1 | SLC9A3R1 |
| E2F1 | SLC9A7   |
| E2F1 | SLF2     |
| E2F1 | SLFN13   |
| E2F1 | SLIRP    |
| E2F1 | SLK      |
| E2F1 | SLMAP    |
| E2F1 | SLTM     |



|      |         |
|------|---------|
| E2F1 | SMAD2   |
| E2F1 | SMAP1   |
| E2F1 | SMARCA2 |
| E2F1 | SMARCA4 |
| E2F1 | SMARCB1 |
| E2F1 | SMARCC1 |
| E2F1 | SMARCD2 |
| E2F1 | SMC1A   |
| E2F1 | SMC2    |
| E2F1 | SMC3    |
| E2F1 | SMC4    |
| E2F1 | SMCHD1  |
| E2F1 | SMCR5   |
| E2F1 | SMDT1   |
| E2F1 | SMIM13  |
| E2F1 | SMIM19  |
| E2F1 | SMIM20  |
| E2F1 | SMIM4   |
| E2F1 | SMNDC1  |
| E2F1 | SMPD2   |
| E2F1 | SMPD4   |
| E2F1 | SMS     |
| E2F1 | SMURF1  |
| E2F1 | SMYD4   |
| E2F1 | SNAP23  |
| E2F1 | SNAP47  |
| E2F1 | SND1    |
| E2F1 | SNF8    |
| E2F1 | SNHG10  |
| E2F1 | SNHG19  |
| E2F1 | SNHG21  |
| E2F1 | SNHG25  |
| E2F1 | SNHG7   |
| E2F1 | SNRNP25 |
| E2F1 | SNRNP35 |
| E2F1 | SNRNP40 |
| E2F1 | SNRNP48 |
| E2F1 | SNRNP70 |
| E2F1 | SNRPA   |
| E2F1 | SNRPA1  |
| E2F1 | SNRPB   |
| E2F1 | SNRPD1  |
| E2F1 | SNRPD2  |
| E2F1 | SNRPE   |
| E2F1 | SNRPF   |
| E2F1 | SNRPG   |
| E2F1 | SNTA1   |
| E2F1 | SNTB2   |
| E2F1 | SNU13   |
| E2F1 | SNW1    |

|      |          |
|------|----------|
| E2F1 | SNX1     |
| E2F1 | SNX16    |
| E2F1 | SNX22    |
| E2F1 | SNX3     |
| E2F1 | SNX5     |
| E2F1 | SOAT1    |
| E2F1 | SOD1     |
| E2F1 | SOGA1    |
| E2F1 | SOX4     |
| E2F1 | SP1      |
| E2F1 | SP4      |
| E2F1 | SPAG16   |
| E2F1 | SPAST    |
| E2F1 | SPC24    |
| E2F1 | SPECC1   |
| E2F1 | SPI1     |
| E2F1 | SPIN1    |
| E2F1 | SPIN2B   |
| E2F1 | SP0PL    |
| E2F1 | SPPL2A   |
| E2F1 | SPTSSA   |
| E2F1 | SREK1    |
| E2F1 | SREK1IP1 |
| E2F1 | SRGAP2   |
| E2F1 | SRP14    |
| E2F1 | SRP19    |
| E2F1 | SRP68    |
| E2F1 | SRP9     |
| E2F1 | SRPK1    |
| E2F1 | SRPRB    |
| E2F1 | SRRM1    |
| E2F1 | SRRM2    |
| E2F1 | SRRT     |
| E2F1 | SRSF1    |
| E2F1 | SRSF10   |
| E2F1 | SRSF2    |
| E2F1 | SRSF3    |
| E2F1 | SRSF4    |
| E2F1 | SRSF6    |
| E2F1 | SRSF7    |
| E2F1 | SRSF9    |
| E2F1 | SS18L2   |
| E2F1 | SSB      |
| E2F1 | SSNA1    |
| E2F1 | SSRP1    |
| E2F1 | SSTR2    |
| E2F1 | SSU72    |
| E2F1 | ST14     |
| E2F1 | ST3GAL3  |
| E2F1 | STAG1    |

|      |         |
|------|---------|
| E2F1 | STAG2   |
| E2F1 | STAG3   |
| E2F1 | STARD7  |
| E2F1 | STAT6   |
| E2F1 | STIM2   |
| E2F1 | STK11   |
| E2F1 | STK32C  |
| E2F1 | STK38L  |
| E2F1 | STK39   |
| E2F1 | STK40   |
| E2F1 | STMN1   |
| E2F1 | STS     |
| E2F1 | STUB1   |
| E2F1 | STX10   |
| E2F1 | STX11   |
| E2F1 | STX17   |
| E2F1 | STX7    |
| E2F1 | STYX    |
| E2F1 | SUCLA2  |
| E2F1 | SUCLG1  |
| E2F1 | SUCLG2  |
| E2F1 | SUGCT   |
| E2F1 | SUGT1   |
| E2F1 | SUM01   |
| E2F1 | SUM02   |
| E2F1 | SUM03   |
| E2F1 | SUPT16H |
| E2F1 | SUPT4H1 |
| E2F1 | SUSD3   |
| E2F1 | SUZ12   |
| E2F1 | SVIP    |
| E2F1 | SYAP1   |
| E2F1 | SYCE1L  |
| E2F1 | SYK     |
| E2F1 | SYNC    |
| E2F1 | SYNE2   |
| E2F1 | SYNGR1  |
| E2F1 | SYPL1   |
| E2F1 | SZRD1   |
| E2F1 | TAB2    |
| E2F1 | TADA2A  |
| E2F1 | TAF15   |
| E2F1 | TAF3    |
| E2F1 | TAF6    |
| E2F1 | TAF6L   |
| E2F1 | TAF9B   |
| E2F1 | TAGLN2  |
| E2F1 | TALD01  |
| E2F1 | TARBP1  |
| E2F1 | TARBP2  |

|      |             |
|------|-------------|
| E2F1 | TARDBP      |
| E2F1 | TAX1BP3     |
| E2F1 | TBC1D1      |
| E2F1 | TBC1D14     |
| E2F1 | TBC1D20     |
| E2F1 | TBC1D22A    |
| E2F1 | TBC1D24     |
| E2F1 | TBC1D2B     |
| E2F1 | TBCA        |
| E2F1 | TBCC        |
| E2F1 | TBCK        |
| E2F1 | TCEA1       |
| E2F1 | TCEAL9      |
| E2F1 | TCERG1      |
| E2F1 | TCIRG1      |
| E2F1 | TCL1A       |
| E2F1 | TCL1B       |
| E2F1 | TCP1        |
| E2F1 | TCTE3       |
| E2F1 | TCTEX1D2    |
| E2F1 | TDG         |
| E2F1 | TDRD3       |
| E2F1 | TECR        |
| E2F1 | TEL02       |
| E2F1 | TERF1       |
| E2F1 | TERF2       |
| E2F1 | TESC        |
| E2F1 | TEX264      |
| E2F1 | TEX30       |
| E2F1 | TEX9        |
| E2F1 | TFAP4       |
| E2F1 | TFDP1       |
| E2F1 | TFDP2       |
| E2F1 | TFEB        |
| E2F1 | TGDS        |
| E2F1 | TGM2        |
| E2F1 | TGS1        |
| E2F1 | THAP1       |
| E2F1 | THAP11      |
| E2F1 | THAP7       |
| E2F1 | THAP7-AS1   |
| E2F1 | THEM4       |
| E2F1 | THEM6       |
| E2F1 | THOC3       |
| E2F1 | THOC7       |
| E2F1 | THOP1       |
| E2F1 | THRAP3      |
| E2F1 | THUMPD2     |
| E2F1 | THUMPD3-AS1 |
| E2F1 | TIA1        |

|      |            |
|------|------------|
| E2F1 | TIAL1      |
| E2F1 | TIFA       |
| E2F1 | TIGAR      |
| E2F1 | TIMELESS   |
| E2F1 | TIMM8B     |
| E2F1 | TIPIN      |
| E2F1 | TIRAP      |
| E2F1 | TK1        |
| E2F1 | TKFC       |
| E2F1 | TKT        |
| E2F1 | TLK2       |
| E2F1 | TMA7       |
| E2F1 | TMC5       |
| E2F1 | TMC03      |
| E2F1 | TMC06      |
| E2F1 | TMED1      |
| E2F1 | TMED8      |
| E2F1 | TMEM106C   |
| E2F1 | TMEM107    |
| E2F1 | TMEM11     |
| E2F1 | TMEM123    |
| E2F1 | TMEM126B   |
| E2F1 | TMEM141    |
| E2F1 | TMEM14A    |
| E2F1 | TMEM14B    |
| E2F1 | TMEM14C    |
| E2F1 | TMEM156    |
| E2F1 | TMEM160    |
| E2F1 | TMEM186    |
| E2F1 | TMEM201    |
| E2F1 | TMEM214    |
| E2F1 | TMEM223    |
| E2F1 | TMEM245    |
| E2F1 | TMEM256    |
| E2F1 | TMEM258    |
| E2F1 | TMEM33     |
| E2F1 | TMEM39B    |
| E2F1 | TMEM44     |
| E2F1 | TMEM60     |
| E2F1 | TMEM64     |
| E2F1 | TMP0       |
| E2F1 | TMP0-AS1   |
| E2F1 | TMSB10     |
| E2F1 | TMSB4X     |
| E2F1 | TMUB1      |
| E2F1 | TMX1       |
| E2F1 | TNRC6A     |
| E2F1 | TNRC6C     |
| E2F1 | TOLLIP-AS1 |
| E2F1 | TOMM5      |

|      |          |
|------|----------|
| E2F1 | TOMM7    |
| E2F1 | TONSL    |
| E2F1 | TOP1     |
| E2F1 | TOP3A    |
| E2F1 | TOPBP1   |
| E2F1 | TOPORS   |
| E2F1 | TOX4     |
| E2F1 | TP53INP2 |
| E2F1 | TPCN1    |
| E2F1 | TPD52    |
| E2F1 | TPGS2    |
| E2F1 | TPI1     |
| E2F1 | TPM3     |
| E2F1 | TPR      |
| E2F1 | TPRA1    |
| E2F1 | TRA2B    |
| E2F1 | TRABD    |
| E2F1 | TRAF5    |
| E2F1 | TRAF7    |
| E2F1 | TRAPPC1  |
| E2F1 | TRAPPC12 |
| E2F1 | TRIB3    |
| E2F1 | TRIM14   |
| E2F1 | TRIM28   |
| E2F1 | TRIM41   |
| E2F1 | TRIM61   |
| E2F1 | TRIM73   |
| E2F1 | TRMT10B  |
| E2F1 | TRMT11   |
| E2F1 | TRMT1L   |
| E2F1 | TRNAU1AP |
| E2F1 | TROVE2   |
| E2F1 | TRRAP    |
| E2F1 | TSC22D1  |
| E2F1 | TSEN34   |
| E2F1 | TSPAN14  |
| E2F1 | TSTD1    |
| E2F1 | TTC1     |
| E2F1 | TTC13    |
| E2F1 | TTC14    |
| E2F1 | TTC39C   |
| E2F1 | TTC9C    |
| E2F1 | TTF1     |
| E2F1 | TTF2     |
| E2F1 | TTI2     |
| E2F1 | TUBA1B   |
| E2F1 | TUBA4A   |
| E2F1 | TUBB     |
| E2F1 | TUBB4B   |
| E2F1 | TUBG1    |

|      |         |
|------|---------|
| E2F1 | TUBGCP4 |
| E2F1 | TUBGCP5 |
| E2F1 | TWF2    |
| E2F1 | TXLNA   |
| E2F1 | TXN2    |
| E2F1 | TXNDC17 |
| E2F1 | TXNDC9  |
| E2F1 | TXNRD1  |
| E2F1 | TYK2    |
| E2F1 | TYMS    |
| E2F1 | UBA1    |
| E2F1 | UBA2    |
| E2F1 | UBA3    |
| E2F1 | UBA5    |
| E2F1 | UBA52   |
| E2F1 | UBAC1   |
| E2F1 | UBAP1   |
| E2F1 | UBB     |
| E2F1 | UBE2A   |
| E2F1 | UBE2D1  |
| E2F1 | UBE2E1  |
| E2F1 | UBE2E3  |
| E2F1 | UBE2G1  |
| E2F1 | UBE2G2  |
| E2F1 | UBE2I   |
| E2F1 | UBE2J1  |
| E2F1 | UBE2L3  |
| E2F1 | UBE2M   |
| E2F1 | UBE2N   |
| E2F1 | UBE2R2  |
| E2F1 | UBE2T   |
| E2F1 | UBE2V1  |
| E2F1 | UBE2V2  |
| E2F1 | UBE3A   |
| E2F1 | UBE3D   |
| E2F1 | UBL5    |
| E2F1 | UBL7    |
| E2F1 | UBN1    |
| E2F1 | UBR3    |
| E2F1 | UBR4    |
| E2F1 | UBTF    |
| E2F1 | UCHL3   |
| E2F1 | UCHL5   |
| E2F1 | UCP2    |
| E2F1 | UGP2    |
| E2F1 | UHRF1   |
| E2F1 | UHRF2   |
| E2F1 | UIMC1   |
| E2F1 | UNC45A  |
| E2F1 | UNC93B1 |

|      |         |
|------|---------|
| E2F1 | UNG     |
| E2F1 | UNK     |
| E2F1 | UPF3A   |
| E2F1 | UPF3B   |
| E2F1 | UQCR10  |
| E2F1 | UQCRB   |
| E2F1 | UQCRC1  |
| E2F1 | UQCRC2  |
| E2F1 | UQCRFS1 |
| E2F1 | UQCRH   |
| E2F1 | UQCRQ   |
| E2F1 | URM1    |
| E2F1 | USB1    |
| E2F1 | USP1    |
| E2F1 | USP10   |
| E2F1 | USP14   |
| E2F1 | USP22   |
| E2F1 | USP28   |
| E2F1 | USP30   |
| E2F1 | USP34   |
| E2F1 | USP39   |
| E2F1 | USP4    |
| E2F1 | USP45   |
| E2F1 | USP49   |
| E2F1 | UTP18   |
| E2F1 | UTP4    |
| E2F1 | UVRAG   |
| E2F1 | VAMP1   |
| E2F1 | VAMP8   |
| E2F1 | VAPA    |
| E2F1 | VARS2   |
| E2F1 | VAV2    |
| E2F1 | VBP1    |
| E2F1 | VDAC1   |
| E2F1 | VDAC3   |
| E2F1 | VMA21   |
| E2F1 | VPS25   |
| E2F1 | VPS29   |
| E2F1 | VRK1    |
| E2F1 | VSIG10  |
| E2F1 | VTA1    |
| E2F1 | WAC     |
| E2F1 | WAS     |
| E2F1 | WASL    |
| E2F1 | WBP4    |
| E2F1 | WDFY2   |
| E2F1 | WDR1    |
| E2F1 | WDR33   |
| E2F1 | WDR34   |
| E2F1 | WDR4    |



|      |            |
|------|------------|
| E2F1 | WDR5       |
| E2F1 | WDR53      |
| E2F1 | WDR76      |
| E2F1 | WDR82      |
| E2F1 | WDR83      |
| E2F1 | WDR89      |
| E2F1 | WDR90      |
| E2F1 | WDSUB1     |
| E2F1 | WDTC1      |
| E2F1 | WDYHV1     |
| E2F1 | WEE1       |
| E2F1 | WIPI2      |
| E2F1 | WRAP53     |
| E2F1 | WRN        |
| E2F1 | WTAP       |
| E2F1 | XPNPEP1    |
| E2F1 | XPNPEP3    |
| E2F1 | XP01       |
| E2F1 | XRCC2      |
| E2F1 | XRCC4      |
| E2F1 | XRCC5      |
| E2F1 | XRCC6      |
| E2F1 | XRN2       |
| E2F1 | YARS       |
| E2F1 | YBEY       |
| E2F1 | YBX1       |
| E2F1 | YEATS4     |
| E2F1 | YTHDF2     |
| E2F1 | YTHDF3-AS1 |
| E2F1 | YWHAB      |
| E2F1 | YWHAE      |
| E2F1 | YWHAH      |
| E2F1 | YWHAQ      |
| E2F1 | YWHAZ      |
| E2F1 | YY1        |
| E2F1 | ZBED5-AS1  |
| E2F1 | ZBTB7A     |
| E2F1 | ZBTB80S    |
| E2F1 | ZC3H13     |
| E2F1 | ZC3H14     |
| E2F1 | ZC3HAV1    |
| E2F1 | ZCCHC17    |
| E2F1 | ZCCHC18    |
| E2F1 | ZCCHC8     |
| E2F1 | ZDHHC12    |
| E2F1 | ZDHHC13    |
| E2F1 | ZDHHC3     |
| E2F1 | ZDHHC4     |
| E2F1 | ZDHHC5     |
| E2F1 | ZFAND2A    |

|      |            |
|------|------------|
| E2F1 | ZFAND2B    |
| E2F1 | ZFAND3     |
| E2F1 | ZFAND6     |
| E2F1 | ZFAS1      |
| E2F1 | ZFP91      |
| E2F1 | ZFYVE19    |
| E2F1 | ZKSCAN4    |
| E2F1 | ZMYM4      |
| E2F1 | ZMYND19    |
| E2F1 | ZNF101     |
| E2F1 | ZNF106     |
| E2F1 | ZNF107     |
| E2F1 | ZNF141     |
| E2F1 | ZNF16      |
| E2F1 | ZNF215     |
| E2F1 | ZNF230     |
| E2F1 | ZNF326     |
| E2F1 | ZNF337-AS1 |
| E2F1 | ZNF367     |
| E2F1 | ZNF428     |
| E2F1 | ZNF444     |
| E2F1 | ZNF514     |
| E2F1 | ZNF519     |
| E2F1 | ZNF529-AS1 |
| E2F1 | ZNF544     |
| E2F1 | ZNF580     |
| E2F1 | ZNF584     |
| E2F1 | ZNF595     |
| E2F1 | ZNF668     |
| E2F1 | ZNF688     |
| E2F1 | ZNF689     |
| E2F1 | ZNF718     |
| E2F1 | ZNF76      |
| E2F1 | ZNF776     |
| E2F1 | ZNF787     |
| E2F1 | ZNF837     |
| E2F1 | ZNF93      |
| E2F1 | ZNHIT1     |
| E2F1 | ZNHIT3     |
| E2F1 | ZPBP2      |
| E2F1 | ZRANB1     |
| E2F1 | ZRANB3     |
| E2F1 | ZW10       |
| E2F1 | ZWILCH     |
| E2F1 | ZWINT      |
| E2F2 | AACS       |
| E2F2 | ABHD17A    |
| E2F2 | ABHD5      |
| E2F2 | ACAP1      |
| E2F2 | ACAP2      |

|      |           |
|------|-----------|
| E2F2 | ACAP3     |
| E2F2 | ADCK5     |
| E2F2 | AEBP2     |
| E2F2 | AGBL5     |
| E2F2 | AGPS      |
| E2F2 | AHI1      |
| E2F2 | AIG1      |
| E2F2 | AKR7A2    |
| E2F2 | ALKBH2    |
| E2F2 | ALKBH6    |
| E2F2 | ANAPC11   |
| E2F2 | AN06      |
| E2F2 | ANXA5     |
| E2F2 | AP1S1     |
| E2F2 | AP4M1     |
| E2F2 | AP00      |
| E2F2 | ARID1A    |
| E2F2 | ARID1B    |
| E2F2 | ARL17A    |
| E2F2 | ARL6IP6   |
| E2F2 | ASB16-AS1 |
| E2F2 | ASF1B     |
| E2F2 | ASL       |
| E2F2 | ASTE1     |
| E2F2 | ATAD2     |
| E2F2 | ATG16L1   |
| E2F2 | ATG4D     |
| E2F2 | ATP2A3    |
| E2F2 | ATP6V1B2  |
| E2F2 | B3GLCT    |
| E2F2 | BARD1     |
| E2F2 | BAZ1B     |
| E2F2 | BCL2L1    |
| E2F2 | BCL7B     |
| E2F2 | BRI3BP    |
| E2F2 | C17orf58  |
| E2F2 | C1orf112  |
| E2F2 | C20orf27  |
| E2F2 | C3orf14   |
| E2F2 | C6orf136  |
| E2F2 | CADPS     |
| E2F2 | CALM1     |
| E2F2 | CARHSP1   |
| E2F2 | CASP8AP2  |
| E2F2 | CBFB      |
| E2F2 | CBX2      |
| E2F2 | CBX5      |
| E2F2 | CCDC150   |
| E2F2 | CCDC167   |
| E2F2 | CCDC171   |

|      |          |
|------|----------|
| E2F2 | CCDC61   |
| E2F2 | CCDC88C  |
| E2F2 | CDC45    |
| E2F2 | CDCA5    |
| E2F2 | CDK2AP2  |
| E2F2 | CDK5RAP3 |
| E2F2 | CDKN2AIP |
| E2F2 | CDKN2D   |
| E2F2 | CDT1     |
| E2F2 | CELF2    |
| E2F2 | CENPK    |
| E2F2 | CENPM    |
| E2F2 | CENPN    |
| E2F2 | CENPQ    |
| E2F2 | CENPU    |
| E2F2 | CEP131   |
| E2F2 | CEP295   |
| E2F2 | CEP41    |
| E2F2 | CEP97    |
| E2F2 | CHAF1B   |
| E2F2 | CHD4     |
| E2F2 | CLDN23   |
| E2F2 | CLIC1    |
| E2F2 | CLSPN    |
| E2F2 | CMPK2    |
| E2F2 | CNTLN    |
| E2F2 | COCH     |
| E2F2 | COQ5     |
| E2F2 | COX8A    |
| E2F2 | CPSF1    |
| E2F2 | CREB3L2  |
| E2F2 | CSRP1    |
| E2F2 | CTDSPL2  |
| E2F2 | CTNNAL1  |
| E2F2 | CYTH2    |
| E2F2 | DDT      |
| E2F2 | DDX11    |
| E2F2 | DEK      |
| E2F2 | DHCR7    |
| E2F2 | DHRS13   |
| E2F2 | DIAPH2   |
| E2F2 | DIMT1    |
| E2F2 | DLG1     |
| E2F2 | DMXL1    |
| E2F2 | DNA2     |
| E2F2 | DNAJC19  |
| E2F2 | DNAJC9   |
| E2F2 | DONSON   |
| E2F2 | DPYSL2   |
| E2F2 | DSN1     |

|      |         |
|------|---------|
| E2F2 | DTL     |
| E2F2 | DUT     |
| E2F2 | DYRK4   |
| E2F2 | E2F2    |
| E2F2 | E2F6    |
| E2F2 | E2F8    |
| E2F2 | EBP     |
| E2F2 | EGR3    |
| E2F2 | EIF2B5  |
| E2F2 | EIF4A3  |
| E2F2 | EIF5A2  |
| E2F2 | ELF2    |
| E2F2 | ELM01   |
| E2F2 | ENOSF1  |
| E2F2 | ERBIN   |
| E2F2 | ERCC3   |
| E2F2 | ERI2    |
| E2F2 | EXOG    |
| E2F2 | EYA3    |
| E2F2 | EZH2    |
| E2F2 | FAF1    |
| E2F2 | FAM111B |
| E2F2 | FAM50B  |
| E2F2 | FAM53C  |
| E2F2 | FAM96A  |
| E2F2 | FANCL   |
| E2F2 | FBXL4   |
| E2F2 | FBXW8   |
| E2F2 | FEN1    |
| E2F2 | FOXM1   |
| E2F2 | FSD1L   |
| E2F2 | FTH1    |
| E2F2 | GFI1    |
| E2F2 | GINM1   |
| E2F2 | GINS1   |
| E2F2 | GINS2   |
| E2F2 | GLG1    |
| E2F2 | GLMN    |
| E2F2 | GMEB1   |
| E2F2 | GMNN    |
| E2F2 | GOLPH3  |
| E2F2 | GPAT2   |
| E2F2 | GPR174  |
| E2F2 | H2AFV   |
| E2F2 | H2AFX   |
| E2F2 | H2AFZ   |
| E2F2 | H3F3A   |
| E2F2 | HAT1    |
| E2F2 | HDAC6   |
| E2F2 | HDHD2   |

|      |           |
|------|-----------|
| E2F2 | HELLS     |
| E2F2 | HERC2     |
| E2F2 | HES1      |
| E2F2 | HIP1      |
| E2F2 | HIRIP3    |
| E2F2 | HIST1H2AI |
| E2F2 | HMCE5     |
| E2F2 | HMGA1     |
| E2F2 | HMGB1     |
| E2F2 | HMGB2     |
| E2F2 | HMGN2     |
| E2F2 | HNRNPA0   |
| E2F2 | HNRNPF    |
| E2F2 | HSP90AB1  |
| E2F2 | HSPB11    |
| E2F2 | HSPBAP1   |
| E2F2 | ICMT      |
| E2F2 | IDH2      |
| E2F2 | IDI1      |
| E2F2 | IFI16     |
| E2F2 | IMPA2     |
| E2F2 | IMPDH1    |
| E2F2 | IN080E    |
| E2F2 | IP09      |
| E2F2 | IPPK      |
| E2F2 | IQCB1     |
| E2F2 | ISCU      |
| E2F2 | ITFG1     |
| E2F2 | ITGB3BP   |
| E2F2 | ITPR3     |
| E2F2 | JADE1     |
| E2F2 | JAML      |
| E2F2 | KAT2B     |
| E2F2 | KIF11     |
| E2F2 | KIF15     |
| E2F2 | KLHDC2    |
| E2F2 | KLHDC3    |
| E2F2 | KLHL23    |
| E2F2 | KRI1      |
| E2F2 | LAP3      |
| E2F2 | LARP7     |
| E2F2 | LCMT1     |
| E2F2 | LENG8     |
| E2F2 | LILRB1    |
| E2F2 | LIPA      |
| E2F2 | LRR1      |
| E2F2 | LRRC40    |
| E2F2 | LSM3      |
| E2F2 | LSS       |
| E2F2 | LYRM7     |

|      |            |
|------|------------|
| E2F2 | MAD2L2     |
| E2F2 | MAML1      |
| E2F2 | MAP2K6     |
| E2F2 | MAPK1IP1L  |
| E2F2 | MAST3      |
| E2F2 | MASTL      |
| E2F2 | MBP        |
| E2F2 | MCM10      |
| E2F2 | MCM2       |
| E2F2 | MCM3       |
| E2F2 | MCM4       |
| E2F2 | MCM5       |
| E2F2 | MCM7       |
| E2F2 | MFGE8      |
| E2F2 | MGME1      |
| E2F2 | MIDN       |
| E2F2 | MIR3142HG  |
| E2F2 | MIS12      |
| E2F2 | MIS18A     |
| E2F2 | MNAT1      |
| E2F2 | MND1       |
| E2F2 | MON1B      |
| E2F2 | MSRB2      |
| E2F2 | MTMR4      |
| E2F2 | MYBL2      |
| E2F2 | MYL6B      |
| E2F2 | MYO1G      |
| E2F2 | MYO6       |
| E2F2 | NAA38      |
| E2F2 | NASP       |
| E2F2 | NCAPH2     |
| E2F2 | NFATC2IP   |
| E2F2 | NFATC4     |
| E2F2 | NFYB       |
| E2F2 | NINJ1      |
| E2F2 | NINJ2      |
| E2F2 | NIPSNAP3A  |
| E2F2 | NR6A1      |
| E2F2 | NUDT1      |
| E2F2 | NUDT21     |
| E2F2 | NUP210     |
| E2F2 | NUP50      |
| E2F2 | NUP58      |
| E2F2 | NUTM2A-AS1 |
| E2F2 | OGFOD1     |
| E2F2 | OGG1       |
| E2F2 | ORC4       |
| E2F2 | OSBPL9     |
| E2F2 | PAG1       |
| E2F2 | PAK1       |

|      |            |
|------|------------|
| E2F2 | PAN2       |
| E2F2 | PBRM1      |
| E2F2 | PCNA       |
| E2F2 | PDXDC1     |
| E2F2 | PGP        |
| E2F2 | PHF10      |
| E2F2 | PIGM       |
| E2F2 | PKMYT1     |
| E2F2 | PKN2       |
| E2F2 | PLAC8      |
| E2F2 | PLEKHA2    |
| E2F2 | PLEKHA8    |
| E2F2 | PLK4       |
| E2F2 | PMS2       |
| E2F2 | POC1A      |
| E2F2 | POLE       |
| E2F2 | POLQ       |
| E2F2 | PPM1N      |
| E2F2 | PPP1CA     |
| E2F2 | PPP1R37    |
| E2F2 | PPP2R3C    |
| E2F2 | PPP4R3A    |
| E2F2 | PQLC1      |
| E2F2 | PRDM2      |
| E2F2 | PRIM1      |
| E2F2 | PRKAR2B    |
| E2F2 | PRPSAP1    |
| E2F2 | PSIP1      |
| E2F2 | PTMA       |
| E2F2 | PTP4A2     |
| E2F2 | PTPRA      |
| E2F2 | PUSL1      |
| E2F2 | RAB11B-AS1 |
| E2F2 | RAB9A      |
| E2F2 | RALY       |
| E2F2 | RBBP5      |
| E2F2 | RBBP8      |
| E2F2 | RBM7       |
| E2F2 | REC8       |
| E2F2 | RECQL4     |
| E2F2 | RFC4       |
| E2F2 | RFC5       |
| E2F2 | RGS19      |
| E2F2 | RMI1       |
| E2F2 | RNASEK     |
| E2F2 | RNF141     |
| E2F2 | RNF144B    |
| E2F2 | RNF2       |
| E2F2 | RPA2       |
| E2F2 | RPA3       |



|      |          |
|------|----------|
| E2F2 | RPP30    |
| E2F2 | RRM2     |
| E2F2 | RUSC1    |
| E2F2 | SAE1     |
| E2F2 | SAP30    |
| E2F2 | SASS6    |
| E2F2 | SERGEF   |
| E2F2 | SETD9    |
| E2F2 | SF3A1    |
| E2F2 | SFXN5    |
| E2F2 | SGCB     |
| E2F2 | SH2B1    |
| E2F2 | SH3BP1   |
| E2F2 | SH3GLB2  |
| E2F2 | SHANK2   |
| E2F2 | SIGIRR   |
| E2F2 | SIPA1    |
| E2F2 | SIPA1L3  |
| E2F2 | SIRT1    |
| E2F2 | SIVA1    |
| E2F2 | SKA3     |
| E2F2 | SKP2     |
| E2F2 | SLBP     |
| E2F2 | SLC20A1  |
| E2F2 | SLC25A10 |
| E2F2 | SLC03A1  |
| E2F2 | SMAD5    |
| E2F2 | SMC1A    |
| E2F2 | SMC1B    |
| E2F2 | SMC2     |
| E2F2 | SMNDC1   |
| E2F2 | SMPD4    |
| E2F2 | SMYD3    |
| E2F2 | ST3GAL2  |
| E2F2 | STAC3    |
| E2F2 | STMN1    |
| E2F2 | STRN     |
| E2F2 | SUB1     |
| E2F2 | SWSAP1   |
| E2F2 | SYCE2    |
| E2F2 | TAF4     |
| E2F2 | TAF6     |
| E2F2 | TAPBPL   |
| E2F2 | TBL2     |
| E2F2 | TCEA2    |
| E2F2 | TCF12    |
| E2F2 | TDRD3    |
| E2F2 | TEX30    |
| E2F2 | TIMELESS |
| E2F2 | TLK1     |

|      |            |
|------|------------|
| E2F2 | TMEM106C   |
| E2F2 | TMEM107    |
| E2F2 | TMEM131    |
| E2F2 | TMEM14C    |
| E2F2 | TMP0       |
| E2F2 | TOPBP1     |
| E2F2 | TOR1A      |
| E2F2 | TOR1AIP2   |
| E2F2 | TOR2A      |
| E2F2 | TPGS2      |
| E2F2 | TRAFD1     |
| E2F2 | TRIM8      |
| E2F2 | TSEN54     |
| E2F2 | TTC37      |
| E2F2 | TTC7A      |
| E2F2 | TTF1       |
| E2F2 | TUBA1B     |
| E2F2 | TUBB       |
| E2F2 | TYMS       |
| E2F2 | UBE2E2     |
| E2F2 | UCP2       |
| E2F2 | UHRF1      |
| E2F2 | UNG        |
| E2F2 | USP1       |
| E2F2 | USP10      |
| E2F2 | USP13      |
| E2F2 | USP22      |
| E2F2 | VAMP3      |
| E2F2 | VNN2       |
| E2F2 | VPS4A      |
| E2F2 | VPS8       |
| E2F2 | WDR34      |
| E2F2 | WDYHV1     |
| E2F2 | WRAP53     |
| E2F2 | WSB2       |
| E2F2 | WWOX       |
| E2F2 | XRCC1      |
| E2F2 | XRCC2      |
| E2F2 | XRCC4      |
| E2F2 | YEATS2     |
| E2F2 | YTHDF3-AS1 |
| E2F2 | YWHAH      |
| E2F2 | ZC3H10     |
| E2F2 | ZCCHC3     |
| E2F2 | ZDHHC12    |
| E2F2 | ZNF141     |
| E2F2 | ZNF282     |
| E2F2 | ZNF367     |
| E2F2 | ZNF512     |
| E2F2 | ZNF529-AS1 |

|      |          |
|------|----------|
| E2F2 | ZSCAN16  |
| E2F2 | ZWILCH   |
| E2F3 | AAAS     |
| E2F3 | AC0T2    |
| E2F3 | ACSL4    |
| E2F3 | AHCTF1   |
| E2F3 | AHI1     |
| E2F3 | ALCAM    |
| E2F3 | AP2B1    |
| E2F3 | AP5Z1    |
| E2F3 | APEX2    |
| E2F3 | AQR      |
| E2F3 | ARHGAP12 |
| E2F3 | ARPC1A   |
| E2F3 | ASCL2    |
| E2F3 | ASF1B    |
| E2F3 | ATAD2    |
| E2F3 | ATF2     |
| E2F3 | ATG2A    |
| E2F3 | BBIP1    |
| E2F3 | BMP2K    |
| E2F3 | C11orf49 |
| E2F3 | C17orf75 |
| E2F3 | C18orf54 |
| E2F3 | C1orf131 |
| E2F3 | C2orf76  |
| E2F3 | C4orf46  |
| E2F3 | C8orf44  |
| E2F3 | CASP2    |
| E2F3 | CAV1     |
| E2F3 | CCDC125  |
| E2F3 | CCDC28B  |
| E2F3 | CD151    |
| E2F3 | CENPI    |
| E2F3 | CEP63    |
| E2F3 | CHD9     |
| E2F3 | CHERP    |
| E2F3 | CIITA    |
| E2F3 | CNN2     |
| E2F3 | CN0T3    |
| E2F3 | CPSF2    |
| E2F3 | CREBBP   |
| E2F3 | CREM     |
| E2F3 | CSNK1G1  |
| E2F3 | CSTF2T   |
| E2F3 | CUL2     |
| E2F3 | CYLD     |
| E2F3 | DEXI     |
| E2F3 | DHX16    |
| E2F3 | DHX36    |

|      |           |
|------|-----------|
| E2F3 | DHX40     |
| E2F3 | DLGAP4    |
| E2F3 | DNASE1L3  |
| E2F3 | DOCK11    |
| E2F3 | E2F3      |
| E2F3 | EEF2K     |
| E2F3 | EID2      |
| E2F3 | EIF2S1    |
| E2F3 | EIF4A3    |
| E2F3 | ELL2      |
| E2F3 | ELOF1     |
| E2F3 | EXOSC1    |
| E2F3 | FAM216A   |
| E2F3 | FBX034    |
| E2F3 | FCF1      |
| E2F3 | FMR1      |
| E2F3 | FOPNL     |
| E2F3 | FOXK1     |
| E2F3 | FRG1      |
| E2F3 | FUCA1     |
| E2F3 | FYTTD1    |
| E2F3 | GCLM      |
| E2F3 | GIGYF2    |
| E2F3 | GLYCTK    |
| E2F3 | GPALPP1   |
| E2F3 | GTSF1     |
| E2F3 | HAUS4     |
| E2F3 | HAUS6     |
| E2F3 | HCFC1R1   |
| E2F3 | HELLS     |
| E2F3 | HIPK1     |
| E2F3 | HIST1H2AJ |
| E2F3 | HPF1      |
| E2F3 | IFT74     |
| E2F3 | INIP      |
| E2F3 | INTS9     |
| E2F3 | IQGAP1    |
| E2F3 | IRAK1     |
| E2F3 | IRS2      |
| E2F3 | ISCA1     |
| E2F3 | KAT2B     |
| E2F3 | KBTBD2    |
| E2F3 | KHNYN     |
| E2F3 | KLF10     |
| E2F3 | KMT2C     |
| E2F3 | LATS1     |
| E2F3 | LIX1L     |
| E2F3 | LOXL2     |
| E2F3 | MAN1A1    |
| E2F3 | MAP1S     |

|      |          |
|------|----------|
| E2F3 | MCM4     |
| E2F3 | MED26    |
| E2F3 | MED27    |
| E2F3 | MED6     |
| E2F3 | METTLL17 |
| E2F3 | MGME1    |
| E2F3 | MIDN     |
| E2F3 | MKLN1    |
| E2F3 | MMS19    |
| E2F3 | MRPL49   |
| E2F3 | MSANTD4  |
| E2F3 | MSL1     |
| E2F3 | MSRB1    |
| E2F3 | MYLK-AS1 |
| E2F3 | NBN      |
| E2F3 | NCALD    |
| E2F3 | NECAP1   |
| E2F3 | NENF     |
| E2F3 | NGDN     |
| E2F3 | NNT      |
| E2F3 | NOTCH2   |
| E2F3 | NUDC     |
| E2F3 | OSBPL3   |
| E2F3 | PACS1    |
| E2F3 | PAGR1    |
| E2F3 | PAN3     |
| E2F3 | PAQR4    |
| E2F3 | PAX5     |
| E2F3 | PCBD1    |
| E2F3 | PDPR     |
| E2F3 | PFKP     |
| E2F3 | PGM2     |
| E2F3 | PHACTR4  |
| E2F3 | PHF1     |
| E2F3 | PHF14    |
| E2F3 | PIGW     |
| E2F3 | PIKFYVE  |
| E2F3 | POLR2I   |
| E2F3 | POLR2M   |
| E2F3 | PPP1R37  |
| E2F3 | PRKCE    |
| E2F3 | PRMT1    |
| E2F3 | PSMD9    |
| E2F3 | PTBP3    |
| E2F3 | PUSL1    |
| E2F3 | RAD18    |
| E2F3 | RAE1     |
| E2F3 | RANGAP1  |
| E2F3 | RASGEF1B |
| E2F3 | RASSF5   |

|      |            |
|------|------------|
| E2F3 | RBBP8      |
| E2F3 | RCAN1      |
| E2F3 | RFC3       |
| E2F3 | RFX1       |
| E2F3 | RLIM       |
| E2F3 | RNF121     |
| E2F3 | RNF44      |
| E2F3 | RSRC1      |
| E2F3 | SENP1      |
| E2F3 | SFR1       |
| E2F3 | SFXN4      |
| E2F3 | SH3BP1     |
| E2F3 | SHMT2      |
| E2F3 | SLAIN2     |
| E2F3 | SLC25A17   |
| E2F3 | SLC25A33   |
| E2F3 | SMIM13     |
| E2F3 | SMKR1      |
| E2F3 | SMYD2      |
| E2F3 | SNAPC3     |
| E2F3 | SNX12      |
| E2F3 | SNX13      |
| E2F3 | SOCS3      |
| E2F3 | SPAG9      |
| E2F3 | SPG11      |
| E2F3 | STAM2      |
| E2F3 | STARD4     |
| E2F3 | STK32C     |
| E2F3 | SUGP1      |
| E2F3 | SYNCRIP    |
| E2F3 | TAP1       |
| E2F3 | TBL1XR1    |
| E2F3 | TGDS       |
| E2F3 | TGFB1      |
| E2F3 | THAP5      |
| E2F3 | THAP9-AS1  |
| E2F3 | TIGAR      |
| E2F3 | TIPARP-AS1 |
| E2F3 | TIPIN      |
| E2F3 | TM2D3      |
| E2F3 | TM9SF1     |
| E2F3 | TMUB1      |
| E2F3 | TNFAIP3    |
| E2F3 | TOLLIP-AS1 |
| E2F3 | TOMM40     |
| E2F3 | TRIM13     |
| E2F3 | TRPC4AP    |
| E2F3 | TTBK2      |
| E2F3 | TUBG1      |
| E2F3 | TUBGCP5    |

|      |          |
|------|----------|
| E2F3 | TYW1     |
| E2F3 | UFL1     |
| E2F3 | UGDH     |
| E2F3 | UGT8     |
| E2F3 | UNG      |
| E2F3 | VAMP2    |
| E2F3 | VSIG10   |
| E2F3 | WDR24    |
| E2F3 | WDR5     |
| E2F3 | WWP2     |
| E2F3 | YIPF5    |
| E2F3 | YIPF6    |
| E2F3 | ZBTB48   |
| E2F3 | ZFAND3   |
| E2F3 | ZFP91    |
| E2F3 | ZMAT5    |
| E2F3 | ZNF101   |
| E2F3 | ZNF107   |
| E2F3 | ZNF32    |
| E2F3 | ZNF804A  |
| E2F4 | AAAS     |
| E2F4 | AAMP     |
| E2F4 | AAR2     |
| E2F4 | AASDHPPT |
| E2F4 | AATF     |
| E2F4 | ABCD3    |
| E2F4 | ABCF1    |
| E2F4 | ABHD10   |
| E2F4 | ABRACL   |
| E2F4 | ABT1     |
| E2F4 | ACACA    |
| E2F4 | ACAT2    |
| E2F4 | ACBD3    |
| E2F4 | ACBD6    |
| E2F4 | ACIN1    |
| E2F4 | ACTR1B   |
| E2F4 | ACTR2    |
| E2F4 | ACTR3    |
| E2F4 | ACTR6    |
| E2F4 | ADAM15   |
| E2F4 | ADH5     |
| E2F4 | ADIPOR1  |
| E2F4 | ADIPOR2  |
| E2F4 | ADPGK    |
| E2F4 | ADPRHL2  |
| E2F4 | ADRM1    |
| E2F4 | ADSL     |
| E2F4 | ADSS     |
| E2F4 | AFTPH    |
| E2F4 | AGFG1    |

|      |          |
|------|----------|
| E2F4 | AHCTF1   |
| E2F4 | AHCY     |
| E2F4 | AHSA1    |
| E2F4 | AIFM1    |
| E2F4 | AIMP2    |
| E2F4 | AK3      |
| E2F4 | AK6      |
| E2F4 | AKAP8    |
| E2F4 | AKIRIN1  |
| E2F4 | AKR1A1   |
| E2F4 | AKT2     |
| E2F4 | AKTIP    |
| E2F4 | ALAS1    |
| E2F4 | ALDH18A1 |
| E2F4 | ALDOA    |
| E2F4 | ALG13    |
| E2F4 | ALG8     |
| E2F4 | ALKBH2   |
| E2F4 | ALKBH3   |
| E2F4 | ALKBH5   |
| E2F4 | ALYREF   |
| E2F4 | AMD1     |
| E2F4 | ANAPC11  |
| E2F4 | ANAPC13  |
| E2F4 | ANK1     |
| E2F4 | ANKRD17  |
| E2F4 | ANP32A   |
| E2F4 | ANP32B   |
| E2F4 | AP1S2    |
| E2F4 | AP2A1    |
| E2F4 | AP2B1    |
| E2F4 | AP2S1    |
| E2F4 | AP3S1    |
| E2F4 | AP5M1    |
| E2F4 | APBA3    |
| E2F4 | APEH     |
| E2F4 | APP      |
| E2F4 | APPL2    |
| E2F4 | AQR      |
| E2F4 | ARCN1    |
| E2F4 | ARF1     |
| E2F4 | ARF6     |
| E2F4 | ARFIP1   |
| E2F4 | ARFIP2   |
| E2F4 | ARHGDI1A |
| E2F4 | ARL14EP  |
| E2F4 | ARL2     |
| E2F4 | ARL5A    |
| E2F4 | ARMC7    |
| E2F4 | ARPC4    |



|      |          |
|------|----------|
| E2F4 | ARPC5L   |
| E2F4 | ARRDC3   |
| E2F4 | ASNA1    |
| E2F4 | ASNSD1   |
| E2F4 | ATAD3A   |
| E2F4 | ATF4     |
| E2F4 | ATF7     |
| E2F4 | ATG101   |
| E2F4 | ATG12    |
| E2F4 | ATG16L2  |
| E2F4 | ATG3     |
| E2F4 | ATG4B    |
| E2F4 | ATOX1    |
| E2F4 | ATP1B3   |
| E2F4 | ATP6AP2  |
| E2F4 | ATP6V0E1 |
| E2F4 | ATP6V1B2 |
| E2F4 | ATP6V1C1 |
| E2F4 | ATP6V1H  |
| E2F4 | ATXN10   |
| E2F4 | ATXN2L   |
| E2F4 | ATXN7L3  |
| E2F4 | AUH      |
| E2F4 | AURKAIP1 |
| E2F4 | BABAM1   |
| E2F4 | BAG6     |
| E2F4 | BANF1    |
| E2F4 | BATF     |
| E2F4 | BAZ1A    |
| E2F4 | BAZ1B    |
| E2F4 | BBS4     |
| E2F4 | BCAP31   |
| E2F4 | BCAR3    |
| E2F4 | BCAT2    |
| E2F4 | BCCIP    |
| E2F4 | BCL11A   |
| E2F4 | BCL2A1   |
| E2F4 | BCL2L1   |
| E2F4 | BCLAF1   |
| E2F4 | BECN1    |
| E2F4 | BET1     |
| E2F4 | BIRC2    |
| E2F4 | BLOC1S2  |
| E2F4 | BLOC1S4  |
| E2F4 | BMS1     |
| E2F4 | BOD1     |
| E2F4 | BOLA2B   |
| E2F4 | BOP1     |
| E2F4 | BORCS8   |
| E2F4 | BRCC3    |

|      |           |
|------|-----------|
| E2F4 | BRD2      |
| E2F4 | BRF2      |
| E2F4 | BRMS1     |
| E2F4 | BROX      |
| E2F4 | BSG       |
| E2F4 | BTAF1     |
| E2F4 | BTF3      |
| E2F4 | BTF3L4    |
| E2F4 | BUD31     |
| E2F4 | BZW1      |
| E2F4 | BZW2      |
| E2F4 | C12orf10  |
| E2F4 | C12orf29  |
| E2F4 | C14orf119 |
| E2F4 | C16orf91  |
| E2F4 | C17orf53  |
| E2F4 | C18orf21  |
| E2F4 | C19orf25  |
| E2F4 | C19orf48  |
| E2F4 | C19orf53  |
| E2F4 | C1orf131  |
| E2F4 | C1orf174  |
| E2F4 | C1orf52   |
| E2F4 | C1QBP     |
| E2F4 | C20orf27  |
| E2F4 | C21orf2   |
| E2F4 | C6orf226  |
| E2F4 | C6orf47   |
| E2F4 | C8orf33   |
| E2F4 | C8orf59   |
| E2F4 | C9orf78   |
| E2F4 | CACTIN    |
| E2F4 | CACYBP    |
| E2F4 | CALM2     |
| E2F4 | CALR      |
| E2F4 | CAMK4     |
| E2F4 | CAMTA2    |
| E2F4 | CANT1     |
| E2F4 | CANX      |
| E2F4 | CAP1      |
| E2F4 | CAPN10    |
| E2F4 | CAPZA2    |
| E2F4 | CARM1     |
| E2F4 | CARS      |
| E2F4 | CASP3     |
| E2F4 | CBLL1     |
| E2F4 | CBWD1     |
| E2F4 | CBX1      |
| E2F4 | CBX3      |
| E2F4 | CCDC12    |

|      |          |
|------|----------|
| E2F4 | CCDC134  |
| E2F4 | CCDC137  |
| E2F4 | CCDC174  |
| E2F4 | CCDC25   |
| E2F4 | CCDC50   |
| E2F4 | CCDC61   |
| E2F4 | CCDC85B  |
| E2F4 | CCDC97   |
| E2F4 | CCNC     |
| E2F4 | CCND2    |
| E2F4 | CCNL2    |
| E2F4 | CCT2     |
| E2F4 | CCT5     |
| E2F4 | CCT7     |
| E2F4 | CCT8     |
| E2F4 | CCZ1     |
| E2F4 | CD164    |
| E2F4 | CD63     |
| E2F4 | CD82     |
| E2F4 | CDC123   |
| E2F4 | CDC37    |
| E2F4 | CDC37L1  |
| E2F4 | CDC42    |
| E2F4 | CDC42SE1 |
| E2F4 | CDC5L    |
| E2F4 | CDK10    |
| E2F4 | CDK11B   |
| E2F4 | CDK12    |
| E2F4 | CDK4     |
| E2F4 | CDK7     |
| E2F4 | CDK8     |
| E2F4 | CDK9     |
| E2F4 | CDKN2A   |
| E2F4 | CDR2     |
| E2F4 | CEBPG    |
| E2F4 | CEBPZ    |
| E2F4 | CEBPZ0S  |
| E2F4 | CELF1    |
| E2F4 | CELF2    |
| E2F4 | CENPL    |
| E2F4 | CEP131   |
| E2F4 | CEP63    |
| E2F4 | CFAP97   |
| E2F4 | CFL1     |
| E2F4 | CFLAR    |
| E2F4 | CHCHD2   |
| E2F4 | CHCHD3   |
| E2F4 | CHCHD7   |
| E2F4 | CHD1     |
| E2F4 | CHD4     |

|      |         |
|------|---------|
| E2F4 | CHMP1A  |
| E2F4 | CHMP2A  |
| E2F4 | CHMP2B  |
| E2F4 | CHMP4B  |
| E2F4 | CHORDC1 |
| E2F4 | CHST11  |
| E2F4 | CHTOP   |
| E2F4 | CIA01   |
| E2F4 | CIB1    |
| E2F4 | CINP    |
| E2F4 | CIRBP   |
| E2F4 | CIZ1    |
| E2F4 | CKB     |
| E2F4 | CKS2    |
| E2F4 | CLASRP  |
| E2F4 | CLIC1   |
| E2F4 | CLNS1A  |
| E2F4 | CLPP    |
| E2F4 | CLPTM1  |
| E2F4 | CLTA    |
| E2F4 | CMC1    |
| E2F4 | CMSS1   |
| E2F4 | CMTM6   |
| E2F4 | CMTM8   |
| E2F4 | CMTR2   |
| E2F4 | CNBP    |
| E2F4 | CNDP2   |
| E2F4 | CNEP1R1 |
| E2F4 | CNIH1   |
| E2F4 | CNN3    |
| E2F4 | CNOT4   |
| E2F4 | CNPPD1  |
| E2F4 | COA4    |
| E2F4 | COA6    |
| E2F4 | COG2    |
| E2F4 | COIL    |
| E2F4 | COMMD5  |
| E2F4 | COPB1   |
| E2F4 | COPB2   |
| E2F4 | COPS3   |
| E2F4 | COPS5   |
| E2F4 | COPZ1   |
| E2F4 | COQ3    |
| E2F4 | COQ4    |
| E2F4 | COQ9    |
| E2F4 | COX11   |
| E2F4 | COX16   |
| E2F4 | COX17   |
| E2F4 | COX20   |
| E2F4 | COX5B   |

|      |         |
|------|---------|
| E2F4 | COX6A1  |
| E2F4 | COX6B1  |
| E2F4 | COX7A2  |
| E2F4 | COX7A2L |
| E2F4 | COX7C   |
| E2F4 | CPSF4   |
| E2F4 | CPSF6   |
| E2F4 | CREB1   |
| E2F4 | CRIP1   |
| E2F4 | CRK     |
| E2F4 | CRLS1   |
| E2F4 | CRNDE   |
| E2F4 | CSDE1   |
| E2F4 | CSF1    |
| E2F4 | CSK     |
| E2F4 | CSNK1A1 |
| E2F4 | CSNK1D  |
| E2F4 | CSNK2A1 |
| E2F4 | CSNK2B  |
| E2F4 | CSTF2   |
| E2F4 | CSTF3   |
| E2F4 | CTDNEP1 |
| E2F4 | CTDSP1  |
| E2F4 | CTDSPL2 |
| E2F4 | CTNBL1  |
| E2F4 | CTPS1   |
| E2F4 | CTR9    |
| E2F4 | CTSC    |
| E2F4 | CTTN    |
| E2F4 | CUL2    |
| E2F4 | CUL4A   |
| E2F4 | CUTC    |
| E2F4 | CWC15   |
| E2F4 | CWC22   |
| E2F4 | CWC25   |
| E2F4 | CWC27   |
| E2F4 | CYB561  |
| E2F4 | CYB5R4  |
| E2F4 | CYHR1   |
| E2F4 | CYTH2   |
| E2F4 | DALRD3  |
| E2F4 | DAP3    |
| E2F4 | DARS    |
| E2F4 | DAXX    |
| E2F4 | DAZAP1  |
| E2F4 | DAZAP2  |
| E2F4 | DCAF10  |
| E2F4 | DCAF15  |
| E2F4 | DCAF7   |
| E2F4 | DCP1A   |

|      |         |
|------|---------|
| E2F4 | DCUN1D5 |
| E2F4 | DDB1    |
| E2F4 | DDT     |
| E2F4 | DDX10   |
| E2F4 | DDX18   |
| E2F4 | DDX21   |
| E2F4 | DDX23   |
| E2F4 | DDX24   |
| E2F4 | DDX39A  |
| E2F4 | DDX3X   |
| E2F4 | DDX42   |
| E2F4 | DDX46   |
| E2F4 | DDX49   |
| E2F4 | DDX5    |
| E2F4 | DDX50   |
| E2F4 | DDX52   |
| E2F4 | DDX56   |
| E2F4 | DDX6    |
| E2F4 | DENR    |
| E2F4 | DESI1   |
| E2F4 | DEXI    |
| E2F4 | DGCR2   |
| E2F4 | DGU0K   |
| E2F4 | DHX15   |
| E2F4 | DHX30   |
| E2F4 | DHX36   |
| E2F4 | DHX8    |
| E2F4 | DMAP1   |
| E2F4 | DNAJA1  |
| E2F4 | DNAJA2  |
| E2F4 | DNAJA3  |
| E2F4 | DNAJA4  |
| E2F4 | DNAJB6  |
| E2F4 | DNAJC17 |
| E2F4 | DNAJC2  |
| E2F4 | DNAJC24 |
| E2F4 | DNAJC7  |
| E2F4 | DNM2    |
| E2F4 | DNPEP   |
| E2F4 | DNTTIP1 |
| E2F4 | DNTTIP2 |
| E2F4 | DOCK10  |
| E2F4 | DOHH    |
| E2F4 | DPH2    |
| E2F4 | DPH3    |
| E2F4 | DPM1    |
| E2F4 | DPP3    |
| E2F4 | DPP9    |
| E2F4 | DR1     |
| E2F4 | DRG2    |

|      |          |
|------|----------|
| E2F4 | DTD1     |
| E2F4 | DUS1L    |
| E2F4 | DUS3L    |
| E2F4 | DYNC1I2  |
| E2F4 | DYNC1LI1 |
| E2F4 | E2F4     |
| E2F4 | EAPP     |
| E2F4 | ECSIT    |
| E2F4 | EDF1     |
| E2F4 | EEA1     |
| E2F4 | EEF1A1   |
| E2F4 | EEF1B2   |
| E2F4 | EEF1D    |
| E2F4 | EEF1E1   |
| E2F4 | EEF1G    |
| E2F4 | EFHD2    |
| E2F4 | EFR3A    |
| E2F4 | EFTUD2   |
| E2F4 | EIF1AX   |
| E2F4 | EIF2A    |
| E2F4 | EIF2B1   |
| E2F4 | EIF2B2   |
| E2F4 | EIF2S1   |
| E2F4 | EIF2S2   |
| E2F4 | EIF2S3   |
| E2F4 | EIF3A    |
| E2F4 | EIF3B    |
| E2F4 | EIF3D    |
| E2F4 | EIF3G    |
| E2F4 | EIF3I    |
| E2F4 | EIF3K    |
| E2F4 | EIF3M    |
| E2F4 | EIF4A1   |
| E2F4 | EIF4A2   |
| E2F4 | EIF4E    |
| E2F4 | EIF4EBP1 |
| E2F4 | EIF4G1   |
| E2F4 | EIF4G2   |
| E2F4 | EIF5A    |
| E2F4 | EIF6     |
| E2F4 | ELAC2    |
| E2F4 | ELAVL1   |
| E2F4 | ELF2     |
| E2F4 | ELMOD2   |
| E2F4 | ELOF1    |
| E2F4 | ELOVL5   |
| E2F4 | ELP2     |
| E2F4 | ELP3     |
| E2F4 | ELP5     |
| E2F4 | EMC3     |

|      |          |
|------|----------|
| E2F4 | EMC4     |
| E2F4 | EMG1     |
| E2F4 | ENOPH1   |
| E2F4 | ENOX2    |
| E2F4 | ENTHD1   |
| E2F4 | ENY2     |
| E2F4 | EPB41L2  |
| E2F4 | EPC1     |
| E2F4 | ERH      |
| E2F4 | ERI3     |
| E2F4 | ERICH1   |
| E2F4 | ERLIN2   |
| E2F4 | ERP44    |
| E2F4 | ESRRA    |
| E2F4 | ETF1     |
| E2F4 | EXOC7    |
| E2F4 | EXOSC3   |
| E2F4 | EXOSC4   |
| E2F4 | EXOSC5   |
| E2F4 | EXOSC6   |
| E2F4 | FAAP20   |
| E2F4 | FABP5    |
| E2F4 | FAM104A  |
| E2F4 | FAM160A2 |
| E2F4 | FAM168B  |
| E2F4 | FAM173A  |
| E2F4 | FAM177A1 |
| E2F4 | FAM192A  |
| E2F4 | FAM204A  |
| E2F4 | FAM207A  |
| E2F4 | FAM210A  |
| E2F4 | FAM217B  |
| E2F4 | FAM32A   |
| E2F4 | FAM72B   |
| E2F4 | FAM96B   |
| E2F4 | FAM98A   |
| E2F4 | FANCB    |
| E2F4 | FANCF    |
| E2F4 | FARSA    |
| E2F4 | FASTK    |
| E2F4 | FASTKD1  |
| E2F4 | FASTKD5  |
| E2F4 | FBL      |
| E2F4 | FBXL12   |
| E2F4 | FBX011   |
| E2F4 | FBX042   |
| E2F4 | FBXW2    |
| E2F4 | FBXW9    |
| E2F4 | FCF1     |
| E2F4 | FDFT1    |



|      |            |
|------|------------|
| E2F4 | FDPS       |
| E2F4 | FEM1A      |
| E2F4 | FGD2       |
| E2F4 | FGFR1      |
| E2F4 | FIBP       |
| E2F4 | FIP1L1     |
| E2F4 | FIS1       |
| E2F4 | FKBP1A     |
| E2F4 | FLAD1      |
| E2F4 | FNBP4      |
| E2F4 | FNTA       |
| E2F4 | FOSL1      |
| E2F4 | FOXP1      |
| E2F4 | FPGS       |
| E2F4 | FRG1       |
| E2F4 | FTH1       |
| E2F4 | FTSJ1      |
| E2F4 | FUBP1      |
| E2F4 | FUBP3      |
| E2F4 | FUCA1      |
| E2F4 | FUS        |
| E2F4 | FYN        |
| E2F4 | G3BP1      |
| E2F4 | G3BP2      |
| E2F4 | G6PC3      |
| E2F4 | G6PD       |
| E2F4 | GADD45B    |
| E2F4 | GADD45GIP1 |
| E2F4 | GALNT2     |
| E2F4 | GALNT7     |
| E2F4 | GAR1       |
| E2F4 | GARS       |
| E2F4 | GART       |
| E2F4 | GAS7       |
| E2F4 | GCDH       |
| E2F4 | GDAP1      |
| E2F4 | GDI2       |
| E2F4 | GEMIN4     |
| E2F4 | GEMIN5     |
| E2F4 | GEMIN6     |
| E2F4 | GFM1       |
| E2F4 | GFM2       |
| E2F4 | GFOD2      |
| E2F4 | GGA1       |
| E2F4 | GGCT       |
| E2F4 | GGPS1      |
| E2F4 | GHDC       |
| E2F4 | GHITM      |
| E2F4 | GHRL       |
| E2F4 | GID8       |

|      |         |
|------|---------|
| E2F4 | GK      |
| E2F4 | GLRX3   |
| E2F4 | GLRX5   |
| E2F4 | GNAI2   |
| E2F4 | GNAI3   |
| E2F4 | GNB1L   |
| E2F4 | GNL1    |
| E2F4 | GNL2    |
| E2F4 | GNL3    |
| E2F4 | GOSR1   |
| E2F4 | GPALPP1 |
| E2F4 | GPANK1  |
| E2F4 | GPATCH4 |
| E2F4 | GPLD1   |
| E2F4 | GPN1    |
| E2F4 | GPR108  |
| E2F4 | GPR65   |
| E2F4 | GPS2    |
| E2F4 | GRB2    |
| E2F4 | GRPEL1  |
| E2F4 | GRWD1   |
| E2F4 | GSDMD   |
| E2F4 | GSKIP   |
| E2F4 | GSPT1   |
| E2F4 | GSTO1   |
| E2F4 | GTF2A2  |
| E2F4 | GTF2H1  |
| E2F4 | GTF2H2  |
| E2F4 | GTF2H2C |
| E2F4 | GTF3A   |
| E2F4 | GTPBP3  |
| E2F4 | GTPBP4  |
| E2F4 | H3F3B   |
| E2F4 | HARS    |
| E2F4 | HAX1    |
| E2F4 | HCCS    |
| E2F4 | HDAC3   |
| E2F4 | HDAC8   |
| E2F4 | HDDC2   |
| E2F4 | HDHD2   |
| E2F4 | HEATR1  |
| E2F4 | HECTD4  |
| E2F4 | HES6    |
| E2F4 | HGH1    |
| E2F4 | HGS     |
| E2F4 | HIGD1A  |
| E2F4 | HIGD2A  |
| E2F4 | HINT1   |
| E2F4 | HIRA    |
| E2F4 | HK1     |

|      |           |
|------|-----------|
| E2F4 | HMBS      |
| E2F4 | HMGA1     |
| E2F4 | HMOX2     |
| E2F4 | HNRNPA0   |
| E2F4 | HNRNPA2B1 |
| E2F4 | HNRNPA3   |
| E2F4 | HNRNPAB   |
| E2F4 | HNRNPC    |
| E2F4 | HNRNPD    |
| E2F4 | HNRNPF    |
| E2F4 | HNRNPH1   |
| E2F4 | HNRNPH3   |
| E2F4 | HNRNPK    |
| E2F4 | HNRNPR    |
| E2F4 | HNRNPU    |
| E2F4 | HSBP1     |
| E2F4 | HSD17B10  |
| E2F4 | HSP90AA1  |
| E2F4 | HSP90AB1  |
| E2F4 | HSPA4     |
| E2F4 | HSPA8     |
| E2F4 | HSPA9     |
| E2F4 | HSPBP1    |
| E2F4 | HSPD1     |
| E2F4 | HSPE1     |
| E2F4 | HTATIP2   |
| E2F4 | HTATSF1   |
| E2F4 | HYAL2     |
| E2F4 | ICE2      |
| E2F4 | ICMT      |
| E2F4 | ID3       |
| E2F4 | IDH3A     |
| E2F4 | IDH3B     |
| E2F4 | IDI1      |
| E2F4 | IFIH1     |
| E2F4 | IFT20     |
| E2F4 | IFT46     |
| E2F4 | IL2RA     |
| E2F4 | IL4I1     |
| E2F4 | ILF2      |
| E2F4 | ILF3      |
| E2F4 | IMMT      |
| E2F4 | IMP3      |
| E2F4 | IMP4      |
| E2F4 | IMPA1     |
| E2F4 | IMPACT    |
| E2F4 | IMPDH1    |
| E2F4 | ING5      |
| E2F4 | IN080     |
| E2F4 | INTS10    |

|      |           |
|------|-----------|
| E2F4 | INTS7     |
| E2F4 | IP04      |
| E2F4 | IP07      |
| E2F4 | IRF5      |
| E2F4 | ISOC2     |
| E2F4 | ISY1      |
| E2F4 | ITFG2     |
| E2F4 | ITGB1BP1  |
| E2F4 | ITPA      |
| E2F4 | ITPK1     |
| E2F4 | JAGN1     |
| E2F4 | JARID2    |
| E2F4 | JAZF1     |
| E2F4 | JMJD8     |
| E2F4 | JRK       |
| E2F4 | KARS      |
| E2F4 | KAT2A     |
| E2F4 | KAT5      |
| E2F4 | KBTBD4    |
| E2F4 | KCMF1     |
| E2F4 | KDM3B     |
| E2F4 | KEAP1     |
| E2F4 | KHNYN     |
| E2F4 | KIAA0100  |
| E2F4 | KIF5B     |
| E2F4 | KLHL18    |
| E2F4 | KMT2D     |
| E2F4 | KNOP1     |
| E2F4 | KPNB1     |
| E2F4 | KRR1      |
| E2F4 | KRTCAP2   |
| E2F4 | KTN1      |
| E2F4 | L3MBTL2   |
| E2F4 | L3MBTL3   |
| E2F4 | LAMTOR1   |
| E2F4 | LAMTOR3   |
| E2F4 | LARP7     |
| E2F4 | LARS      |
| E2F4 | LAS1L     |
| E2F4 | LDHA      |
| E2F4 | LEKR1     |
| E2F4 | LE01      |
| E2F4 | LETM1     |
| E2F4 | LIMK2     |
| E2F4 | LIN7C     |
| E2F4 | LINC00426 |
| E2F4 | LINC00665 |
| E2F4 | LINC00954 |
| E2F4 | LINC01353 |
| E2F4 | LLPH      |

|      |           |
|------|-----------|
| E2F4 | LMAN2     |
| E2F4 | LM07      |
| E2F4 | LONP1     |
| E2F4 | LRCH1     |
| E2F4 | LRPPRC    |
| E2F4 | LRRC47    |
| E2F4 | LRRC58    |
| E2F4 | LRRC59    |
| E2F4 | LRRC61    |
| E2F4 | LRRFIP1   |
| E2F4 | LRRFIP2   |
| E2F4 | LSG1      |
| E2F4 | LSM1      |
| E2F4 | LSM12     |
| E2F4 | LSM14A    |
| E2F4 | LSM2      |
| E2F4 | LSM3      |
| E2F4 | LSM5      |
| E2F4 | LTV1      |
| E2F4 | LUC7L     |
| E2F4 | LUC7L2    |
| E2F4 | LUC7L3    |
| E2F4 | LYN       |
| E2F4 | LYPLA2    |
| E2F4 | LYRM2     |
| E2F4 | LZTFL1    |
| E2F4 | M6PR      |
| E2F4 | MAFG      |
| E2F4 | MAG0H     |
| E2F4 | MALSU1    |
| E2F4 | MAP1S     |
| E2F4 | MAP2K3    |
| E2F4 | MAP3K7    |
| E2F4 | MAP3K8    |
| E2F4 | MAP9      |
| E2F4 | MAPK1IP1L |
| E2F4 | MAPK6     |
| E2F4 | MAPK7     |
| E2F4 | MAPKAP1   |
| E2F4 | MAPKAPK3  |
| E2F4 | MAPRE1    |
| E2F4 | MARS      |
| E2F4 | MATK      |
| E2F4 | MAU2      |
| E2F4 | MBD1      |
| E2F4 | MBD5      |
| E2F4 | MCFD2     |
| E2F4 | MCRIP1    |
| E2F4 | MCRIP2    |
| E2F4 | MCRS1     |

|      |           |
|------|-----------|
| E2F4 | MCTS1     |
| E2F4 | MDH1      |
| E2F4 | MDH2      |
| E2F4 | ME2       |
| E2F4 | MEA1      |
| E2F4 | MEAF6     |
| E2F4 | MED10     |
| E2F4 | MED12     |
| E2F4 | MED19     |
| E2F4 | MED27     |
| E2F4 | MED28     |
| E2F4 | MED6      |
| E2F4 | MED8      |
| E2F4 | METTTL13  |
| E2F4 | METTTL18  |
| E2F4 | METTTL23  |
| E2F4 | METTTL2B  |
| E2F4 | METTTL5   |
| E2F4 | MFAP1     |
| E2F4 | MFF       |
| E2F4 | MFNG      |
| E2F4 | MFSD10    |
| E2F4 | MGAT3     |
| E2F4 | MIA3      |
| E2F4 | MICU2     |
| E2F4 | MIER1     |
| E2F4 | MIF       |
| E2F4 | MINOS1    |
| E2F4 | MIR155HG  |
| E2F4 | MKRN2     |
| E2F4 | MKS1      |
| E2F4 | MLEC      |
| E2F4 | MLF2      |
| E2F4 | MLLT1     |
| E2F4 | MLYCD     |
| E2F4 | MOB4      |
| E2F4 | MOCS3     |
| E2F4 | MORF4L2   |
| E2F4 | MPDU1     |
| E2F4 | MPHOSPH10 |
| E2F4 | MRPL1     |
| E2F4 | MRPL10    |
| E2F4 | MRPL12    |
| E2F4 | MRPL13    |
| E2F4 | MRPL14    |
| E2F4 | MRPL16    |
| E2F4 | MRPL17    |
| E2F4 | MRPL18    |
| E2F4 | MRPL20    |
| E2F4 | MRPL21    |

|      |         |
|------|---------|
| E2F4 | MRPL22  |
| E2F4 | MRPL23  |
| E2F4 | MRPL24  |
| E2F4 | MRPL27  |
| E2F4 | MRPL28  |
| E2F4 | MRPL3   |
| E2F4 | MRPL33  |
| E2F4 | MRPL39  |
| E2F4 | MRPL40  |
| E2F4 | MRPL43  |
| E2F4 | MRPL44  |
| E2F4 | MRPL47  |
| E2F4 | MRPL49  |
| E2F4 | MRPL51  |
| E2F4 | MRPL52  |
| E2F4 | MRPL53  |
| E2F4 | MRPL54  |
| E2F4 | MRPL57  |
| E2F4 | MRPS10  |
| E2F4 | MRPS12  |
| E2F4 | MRPS16  |
| E2F4 | MRPS18A |
| E2F4 | MRPS18B |
| E2F4 | MRPS18C |
| E2F4 | MRPS21  |
| E2F4 | MRPS22  |
| E2F4 | MRPS23  |
| E2F4 | MRPS26  |
| E2F4 | MRPS30  |
| E2F4 | MRPS34  |
| E2F4 | MRRF    |
| E2F4 | MSANTD2 |
| E2F4 | MSN     |
| E2F4 | MST01   |
| E2F4 | MTA3    |
| E2F4 | MTCH2   |
| E2F4 | MTF1    |
| E2F4 | MTG1    |
| E2F4 | MTHFD1L |
| E2F4 | MTHFD2L |
| E2F4 | MTIF2   |
| E2F4 | MTMR14  |
| E2F4 | MTPN    |
| E2F4 | MTX2    |
| E2F4 | MYADM   |
| E2F4 | MYBBP1A |
| E2F4 | MYCBP   |
| E2F4 | MYL12B  |
| E2F4 | MYO19   |
| E2F4 | MYO9B   |

|      |         |
|------|---------|
| E2F4 | NAA10   |
| E2F4 | NAA15   |
| E2F4 | NAA20   |
| E2F4 | NAA50   |
| E2F4 | NAA60   |
| E2F4 | NACA    |
| E2F4 | NAF1    |
| E2F4 | NAGLU   |
| E2F4 | NAP1L1  |
| E2F4 | NAP1L4  |
| E2F4 | NAPA    |
| E2F4 | NARF    |
| E2F4 | NARS    |
| E2F4 | NARS2   |
| E2F4 | NAXE    |
| E2F4 | NBN     |
| E2F4 | NCBP2   |
| E2F4 | NCBP3   |
| E2F4 | NCK2    |
| E2F4 | NCL     |
| E2F4 | NCLN    |
| E2F4 | NDUFA1  |
| E2F4 | NDUFA10 |
| E2F4 | NDUFA13 |
| E2F4 | NDUFAF6 |
| E2F4 | NDUFAF7 |
| E2F4 | NDUFB11 |
| E2F4 | NDUFB3  |
| E2F4 | NDUFB4  |
| E2F4 | NDUFB6  |
| E2F4 | NDUFB7  |
| E2F4 | NDUFB9  |
| E2F4 | NDUFS1  |
| E2F4 | NDUFS3  |
| E2F4 | NDUFS7  |
| E2F4 | NDUFS8  |
| E2F4 | NDUFV1  |
| E2F4 | NEK9    |
| E2F4 | NELFE   |
| E2F4 | NFATC1  |
| E2F4 | NFE2L2  |
| E2F4 | NFKB1   |
| E2F4 | NFKBIE  |
| E2F4 | NFYB    |
| E2F4 | NGDN    |
| E2F4 | NGRN    |
| E2F4 | NHP2    |
| E2F4 | NIFK    |
| E2F4 | NIP7    |
| E2F4 | NIPA2   |



|      |         |
|------|---------|
| E2F4 | NKAP    |
| E2F4 | NME1    |
| E2F4 | NME6    |
| E2F4 | NOC2L   |
| E2F4 | NOC3L   |
| E2F4 | NOL10   |
| E2F4 | NOL11   |
| E2F4 | NOL12   |
| E2F4 | NOL7    |
| E2F4 | NOL8    |
| E2F4 | NOLC1   |
| E2F4 | NOP10   |
| E2F4 | NOP56   |
| E2F4 | NOP58   |
| E2F4 | NOP9    |
| E2F4 | NOSIP   |
| E2F4 | NPM3    |
| E2F4 | NPW     |
| E2F4 | NR1H2   |
| E2F4 | NR2C2AP |
| E2F4 | NR2F6   |
| E2F4 | NR4A1   |
| E2F4 | NR4A2   |
| E2F4 | NRBF2   |
| E2F4 | NSA2    |
| E2F4 | NSL1    |
| E2F4 | NSMCE4A |
| E2F4 | NSUN2   |
| E2F4 | NSUN5   |
| E2F4 | NT5C    |
| E2F4 | NTMT1   |
| E2F4 | NUBP1   |
| E2F4 | NUBP2   |
| E2F4 | NUDC    |
| E2F4 | NUDCD2  |
| E2F4 | NUDT4   |
| E2F4 | NUDT5   |
| E2F4 | NUFIP1  |
| E2F4 | NUP107  |
| E2F4 | NUP153  |
| E2F4 | NUP214  |
| E2F4 | NUP50   |
| E2F4 | NUP54   |
| E2F4 | NUP58   |
| E2F4 | NUP88   |
| E2F4 | NUP93   |
| E2F4 | NUS1    |
| E2F4 | NUTF2   |
| E2F4 | NVL     |
| E2F4 | NXT1    |

|      |          |
|------|----------|
| E2F4 | OARD1    |
| E2F4 | OCIAD1   |
| E2F4 | ODC1     |
| E2F4 | OGF0D1   |
| E2F4 | OGFR     |
| E2F4 | OLA1     |
| E2F4 | OPA1     |
| E2F4 | OPA3     |
| E2F4 | ORC4     |
| E2F4 | ORC5     |
| E2F4 | ORMDL1   |
| E2F4 | ORMDL2   |
| E2F4 | OSBPL11  |
| E2F4 | OSBPL2   |
| E2F4 | OSGEPL1  |
| E2F4 | OSTC     |
| E2F4 | OXNAD1   |
| E2F4 | PA2G4    |
| E2F4 | PABPC1   |
| E2F4 | PABPC4   |
| E2F4 | PABPN1   |
| E2F4 | PAC SIN2 |
| E2F4 | PAICS    |
| E2F4 | PAIP1    |
| E2F4 | PAK1IP1  |
| E2F4 | PAK2     |
| E2F4 | PAN3     |
| E2F4 | PANK3    |
| E2F4 | PAP0LA   |
| E2F4 | PARK7    |
| E2F4 | PARL     |
| E2F4 | PARP3    |
| E2F4 | PARS2    |
| E2F4 | PARVB    |
| E2F4 | PAWR     |
| E2F4 | PCBP1    |
| E2F4 | PCBP2    |
| E2F4 | PCGF5    |
| E2F4 | PCID2    |
| E2F4 | PCNP     |
| E2F4 | PDAP1    |
| E2F4 | PDCD10   |
| E2F4 | PDCD11   |
| E2F4 | PDCD2    |
| E2F4 | PDCD6    |
| E2F4 | PDCD6IP  |
| E2F4 | PDCD7    |
| E2F4 | PDE6B    |
| E2F4 | PDIA3    |
| E2F4 | PDLIM2   |

|      |         |
|------|---------|
| E2F4 | PDLIM5  |
| E2F4 | PDRG1   |
| E2F4 | PDS5A   |
| E2F4 | PDSS2   |
| E2F4 | PEF1    |
| E2F4 | PES1    |
| E2F4 | PET100  |
| E2F4 | PET117  |
| E2F4 | PEX14   |
| E2F4 | PEX16   |
| E2F4 | PFDN1   |
| E2F4 | PFDN2   |
| E2F4 | PFDN5   |
| E2F4 | PFDN6   |
| E2F4 | PFKP    |
| E2F4 | PFN1    |
| E2F4 | PGAM1   |
| E2F4 | PGGT1B  |
| E2F4 | PGK1    |
| E2F4 | PGM1    |
| E2F4 | PGM2    |
| E2F4 | PGP     |
| E2F4 | PHB2    |
| E2F4 | PHF14   |
| E2F4 | PHF23   |
| E2F4 | PHF5A   |
| E2F4 | PHKG2   |
| E2F4 | PI4K2A  |
| E2F4 | PIGM    |
| E2F4 | PIGT    |
| E2F4 | PIGW    |
| E2F4 | PIK3R4  |
| E2F4 | PILRB   |
| E2F4 | PIM3    |
| E2F4 | PIP5K1B |
| E2F4 | PISD    |
| E2F4 | PITPNB  |
| E2F4 | PKIG    |
| E2F4 | PKM     |
| E2F4 | PLAGL1  |
| E2F4 | PLEKHJ1 |
| E2F4 | PLRG1   |
| E2F4 | PMM2    |
| E2F4 | PMPCA   |
| E2F4 | PMPCB   |
| E2F4 | PMS2    |
| E2F4 | PNKP    |
| E2F4 | PNN     |
| E2F4 | PN01    |
| E2F4 | PNP     |

|      |          |
|------|----------|
| E2F4 | PNPT1    |
| E2F4 | POLDIP2  |
| E2F4 | POLE3    |
| E2F4 | POLG     |
| E2F4 | POLR1B   |
| E2F4 | POLR1D   |
| E2F4 | POLR2B   |
| E2F4 | POLR2C   |
| E2F4 | POLR2D   |
| E2F4 | POLR2F   |
| E2F4 | POLR2G   |
| E2F4 | POLR2H   |
| E2F4 | POLR2K   |
| E2F4 | POLR2L   |
| E2F4 | POLR2M   |
| E2F4 | POLR3C   |
| E2F4 | POLR3D   |
| E2F4 | POLR3E   |
| E2F4 | POLR3H   |
| E2F4 | POLRMT   |
| E2F4 | POMP     |
| E2F4 | POP4     |
| E2F4 | POP7     |
| E2F4 | POU2F2   |
| E2F4 | PPAN     |
| E2F4 | PPID     |
| E2F4 | PPIE     |
| E2F4 | PPIG     |
| E2F4 | PPIH     |
| E2F4 | PPIL1    |
| E2F4 | PPIL3    |
| E2F4 | PPIL4    |
| E2F4 | PPM1B    |
| E2F4 | PPM1G    |
| E2F4 | PPP1CB   |
| E2F4 | PPP1R11  |
| E2F4 | PPP1R12A |
| E2F4 | PPP2CA   |
| E2F4 | PPP2CB   |
| E2F4 | PPP2R1A  |
| E2F4 | PPP2R2A  |
| E2F4 | PPP2R5E  |
| E2F4 | PPP4C    |
| E2F4 | PPP4R3B  |
| E2F4 | PPP6R1   |
| E2F4 | PRDX1    |
| E2F4 | PRELID1  |
| E2F4 | PREP     |
| E2F4 | PRKAG1   |
| E2F4 | PRKAR1A  |

|      |           |
|------|-----------|
| E2F4 | PRKRA     |
| E2F4 | PRMT3     |
| E2F4 | PRPF19    |
| E2F4 | PRPF31    |
| E2F4 | PRPF38A   |
| E2F4 | PRPF38B   |
| E2F4 | PRPF4     |
| E2F4 | PRPF40A   |
| E2F4 | PRPF4B    |
| E2F4 | PRPF6     |
| E2F4 | PRPS2     |
| E2F4 | PRR13     |
| E2F4 | PRRC2C    |
| E2F4 | PSAT1     |
| E2F4 | PSMA4     |
| E2F4 | PSMA5     |
| E2F4 | PSMB1     |
| E2F4 | PSMB3     |
| E2F4 | PSMB4     |
| E2F4 | PSMB7     |
| E2F4 | PSMC1     |
| E2F4 | PSMC2     |
| E2F4 | PSMC3     |
| E2F4 | PSMC3IP   |
| E2F4 | PSMC4     |
| E2F4 | PSMC5     |
| E2F4 | PSMC6     |
| E2F4 | PSMD11    |
| E2F4 | PSMD12    |
| E2F4 | PSMD13    |
| E2F4 | PSMD14    |
| E2F4 | PSMD2     |
| E2F4 | PSMD4     |
| E2F4 | PSMD6     |
| E2F4 | PSMD7     |
| E2F4 | PSMD8     |
| E2F4 | PSMD9     |
| E2F4 | PSME1     |
| E2F4 | PSME3     |
| E2F4 | PSME4     |
| E2F4 | PSMF1     |
| E2F4 | PSMG3     |
| E2F4 | PSMG3-AS1 |
| E2F4 | PTBP1     |
| E2F4 | PTDSS2    |
| E2F4 | PTGES2    |
| E2F4 | PTGES3    |
| E2F4 | PTMA      |
| E2F4 | PTPN2     |
| E2F4 | PTPN6     |

|      |         |
|------|---------|
| E2F4 | PTRH1   |
| E2F4 | PTRH2   |
| E2F4 | PUF60   |
| E2F4 | PUM1    |
| E2F4 | PUM3    |
| E2F4 | PUS1    |
| E2F4 | PVT1    |
| E2F4 | PWP1    |
| E2F4 | PYCR2   |
| E2F4 | RAB14   |
| E2F4 | RAB18   |
| E2F4 | RAB21   |
| E2F4 | RAB5A   |
| E2F4 | RAB5C   |
| E2F4 | RAB6A   |
| E2F4 | RAB7A   |
| E2F4 | RAB8A   |
| E2F4 | RAB8B   |
| E2F4 | RABEPK  |
| E2F4 | RABL2B  |
| E2F4 | RACK1   |
| E2F4 | RAD18   |
| E2F4 | RAD23A  |
| E2F4 | RAD23B  |
| E2F4 | RAD54L2 |
| E2F4 | RAE1    |
| E2F4 | RALA    |
| E2F4 | RAN     |
| E2F4 | RANBP1  |
| E2F4 | RANGRF  |
| E2F4 | RAP1A   |
| E2F4 | RAP2C   |
| E2F4 | RARS    |
| E2F4 | RBBP6   |
| E2F4 | RBCK1   |
| E2F4 | RBM14   |
| E2F4 | RBM17   |
| E2F4 | RBM18   |
| E2F4 | RBM22   |
| E2F4 | RBM23   |
| E2F4 | RBM25   |
| E2F4 | RBM28   |
| E2F4 | RBM3    |
| E2F4 | RBM34   |
| E2F4 | RBM39   |
| E2F4 | RBM42   |
| E2F4 | RBM45   |
| E2F4 | RBM7    |
| E2F4 | RBM8A   |
| E2F4 | RCC1    |

|      |          |
|------|----------|
| E2F4 | RCC1L    |
| E2F4 | RCC2     |
| E2F4 | RCHY1    |
| E2F4 | RCL1     |
| E2F4 | RDH14    |
| E2F4 | REL      |
| E2F4 | RELA     |
| E2F4 | RELB     |
| E2F4 | REPS1    |
| E2F4 | RER1     |
| E2F4 | REX04    |
| E2F4 | RHEB     |
| E2F4 | RHOG     |
| E2F4 | RHOT2    |
| E2F4 | RIC8A    |
| E2F4 | RIOK1    |
| E2F4 | RIOK2    |
| E2F4 | RIOK3    |
| E2F4 | RLIM     |
| E2F4 | RNASEH1  |
| E2F4 | RNASEH2B |
| E2F4 | RNF10    |
| E2F4 | RNF126   |
| E2F4 | RNF146   |
| E2F4 | RNF167   |
| E2F4 | RNF181   |
| E2F4 | RNF20    |
| E2F4 | RNF214   |
| E2F4 | RNF34    |
| E2F4 | RNF41    |
| E2F4 | RNF6     |
| E2F4 | RNF7     |
| E2F4 | RNMT     |
| E2F4 | RNPS1    |
| E2F4 | ROCK1    |
| E2F4 | RPA2     |
| E2F4 | RPAP2    |
| E2F4 | RPE      |
| E2F4 | RPF1     |
| E2F4 | RPF2     |
| E2F4 | RPIA     |
| E2F4 | RPL10    |
| E2F4 | RPL10A   |
| E2F4 | RPL11    |
| E2F4 | RPL12    |
| E2F4 | RPL13A   |
| E2F4 | RPL15    |
| E2F4 | RPL17    |
| E2F4 | RPL18A   |
| E2F4 | RPL19    |

|      |          |
|------|----------|
| E2F4 | RPL21    |
| E2F4 | RPL22L1  |
| E2F4 | RPL23    |
| E2F4 | RPL23A   |
| E2F4 | RPL26    |
| E2F4 | RPL26L1  |
| E2F4 | RPL27    |
| E2F4 | RPL27A   |
| E2F4 | RPL28    |
| E2F4 | RPL29    |
| E2F4 | RPL3     |
| E2F4 | RPL30    |
| E2F4 | RPL31    |
| E2F4 | RPL32    |
| E2F4 | RPL34    |
| E2F4 | RPL35    |
| E2F4 | RPL36    |
| E2F4 | RPL36AL  |
| E2F4 | RPL37    |
| E2F4 | RPL37A   |
| E2F4 | RPL38    |
| E2F4 | RPL39    |
| E2F4 | RPL4     |
| E2F4 | RPL41    |
| E2F4 | RPL6     |
| E2F4 | RPL7L1   |
| E2F4 | RPL8     |
| E2F4 | RPLP1    |
| E2F4 | RPLP2    |
| E2F4 | RPP38    |
| E2F4 | RPS10    |
| E2F4 | RPS11    |
| E2F4 | RPS12    |
| E2F4 | RPS13    |
| E2F4 | RPS14    |
| E2F4 | RPS15    |
| E2F4 | RPS16    |
| E2F4 | RPS17    |
| E2F4 | RPS18    |
| E2F4 | RPS19    |
| E2F4 | RPS19BP1 |
| E2F4 | RPS2     |
| E2F4 | RPS20    |
| E2F4 | RPS21    |
| E2F4 | RPS25    |
| E2F4 | RPS26    |
| E2F4 | RPS27    |
| E2F4 | RPS27A   |
| E2F4 | RPS29    |
| E2F4 | RPS3     |



|      |         |
|------|---------|
| E2F4 | RPS3A   |
| E2F4 | RPS4X   |
| E2F4 | RPS5    |
| E2F4 | RPS6    |
| E2F4 | RPS6KA1 |
| E2F4 | RPS6KB2 |
| E2F4 | RPS7    |
| E2F4 | RPS8    |
| E2F4 | RPSA    |
| E2F4 | RPUSD1  |
| E2F4 | RRAGA   |
| E2F4 | RRP12   |
| E2F4 | RRP15   |
| E2F4 | RRP7A   |
| E2F4 | RRP8    |
| E2F4 | RRP9    |
| E2F4 | RRS1    |
| E2F4 | RSAD1   |
| E2F4 | RSL1D1  |
| E2F4 | RSL24D1 |
| E2F4 | RSRC1   |
| E2F4 | RTCB    |
| E2F4 | RUVBL1  |
| E2F4 | RWDD1   |
| E2F4 | RWDD4   |
| E2F4 | RXRB    |
| E2F4 | SAAL1   |
| E2F4 | SAMM50  |
| E2F4 | SAP18   |
| E2F4 | SAP30L  |
| E2F4 | SAR1A   |
| E2F4 | SARS    |
| E2F4 | SART1   |
| E2F4 | SART3   |
| E2F4 | SAYSD1  |
| E2F4 | SBDS    |
| E2F4 | SCAF1   |
| E2F4 | SCAF4   |
| E2F4 | SCNM1   |
| E2F4 | SC01    |
| E2F4 | SC0C    |
| E2F4 | SCRN3   |
| E2F4 | SDAD1   |
| E2F4 | SDCCAG8 |
| E2F4 | SDE2    |
| E2F4 | SDF4    |
| E2F4 | SDHAF1  |
| E2F4 | SDHAF2  |
| E2F4 | SDHB    |
| E2F4 | SDHD    |

|      |          |
|------|----------|
| E2F4 | SEC11A   |
| E2F4 | SEC24C   |
| E2F4 | SEC61G   |
| E2F4 | SEPHS1   |
| E2F4 | SEPT7    |
| E2F4 | SERBP1   |
| E2F4 | SERPINE2 |
| E2F4 | SERTAD1  |
| E2F4 | SET      |
| E2F4 | SETBP1   |
| E2F4 | SETD3    |
| E2F4 | SETD4    |
| E2F4 | SETD5    |
| E2F4 | SETD6    |
| E2F4 | SF1      |
| E2F4 | SF3A1    |
| E2F4 | SF3A2    |
| E2F4 | SF3A3    |
| E2F4 | SF3B1    |
| E2F4 | SF3B2    |
| E2F4 | SF3B4    |
| E2F4 | SF3B5    |
| E2F4 | SF3B6    |
| E2F4 | SFSWAP   |
| E2F4 | SFXN1    |
| E2F4 | SGPL1    |
| E2F4 | SGTA     |
| E2F4 | SH3GL1   |
| E2F4 | SH3GLB1  |
| E2F4 | SHMT2    |
| E2F4 | SHQ1     |
| E2F4 | SIKE1    |
| E2F4 | SIL1     |
| E2F4 | SIRT6    |
| E2F4 | SLC23A2  |
| E2F4 | SLC25A11 |
| E2F4 | SLC25A17 |
| E2F4 | SLC25A3  |
| E2F4 | SLC25A37 |
| E2F4 | SLC25A38 |
| E2F4 | SLC25A39 |
| E2F4 | SLC25A46 |
| E2F4 | SLC25A5  |
| E2F4 | SLC30A6  |
| E2F4 | SLC35A3  |
| E2F4 | SLC35A4  |
| E2F4 | SLC35B2  |
| E2F4 | SLC38A1  |
| E2F4 | SLC38A5  |
| E2F4 | SLC38A6  |

|      |          |
|------|----------|
| E2F4 | SLC39A1  |
| E2F4 | SLC39A14 |
| E2F4 | SLC39A3  |
| E2F4 | SLC39A6  |
| E2F4 | SLC39A7  |
| E2F4 | SLC3A2   |
| E2F4 | SLC43A3  |
| E2F4 | SLC48A1  |
| E2F4 | SLC50A1  |
| E2F4 | SLC52A2  |
| E2F4 | SLC7A1   |
| E2F4 | SLC9A3   |
| E2F4 | SLIRP    |
| E2F4 | SMAD5    |
| E2F4 | SMAP2    |
| E2F4 | SMARCB1  |
| E2F4 | SMARCC1  |
| E2F4 | SMARCD1  |
| E2F4 | SMARCE1  |
| E2F4 | SMC1A    |
| E2F4 | SMC5     |
| E2F4 | SMG7     |
| E2F4 | SMIM15   |
| E2F4 | SMIM7    |
| E2F4 | SMN1     |
| E2F4 | SMNDC1   |
| E2F4 | SMS      |
| E2F4 | SMU1     |
| E2F4 | SNAPC4   |
| E2F4 | SNAPC5   |
| E2F4 | SND1     |
| E2F4 | SNF8     |
| E2F4 | SNHG10   |
| E2F4 | SNHG19   |
| E2F4 | SNRNP40  |
| E2F4 | SNRPA    |
| E2F4 | SNRPA1   |
| E2F4 | SNRPB    |
| E2F4 | SNRPB2   |
| E2F4 | SNRPD1   |
| E2F4 | SNRPD2   |
| E2F4 | SNRPE    |
| E2F4 | SNRPF    |
| E2F4 | SNRPG    |
| E2F4 | SNU13    |
| E2F4 | SNX11    |
| E2F4 | SNX12    |
| E2F4 | SNX17    |
| E2F4 | SOD2     |
| E2F4 | SON      |

|      |          |
|------|----------|
| E2F4 | SPAG7    |
| E2F4 | SPATA5L1 |
| E2F4 | SPEN     |
| E2F4 | SPG21    |
| E2F4 | SPG7     |
| E2F4 | SPHK1    |
| E2F4 | SPINT1   |
| E2F4 | SPTY2D1  |
| E2F4 | SQSTM1   |
| E2F4 | SRGN     |
| E2F4 | SRP14    |
| E2F4 | SRP19    |
| E2F4 | SRP54    |
| E2F4 | SRP72    |
| E2F4 | SRPK1    |
| E2F4 | SRRM1    |
| E2F4 | SRRM2    |
| E2F4 | SRRT     |
| E2F4 | SRSF1    |
| E2F4 | SRSF10   |
| E2F4 | SRSF2    |
| E2F4 | SRSF4    |
| E2F4 | SRSF6    |
| E2F4 | SRSF7    |
| E2F4 | SRSF9    |
| E2F4 | SSB      |
| E2F4 | SSBP1    |
| E2F4 | SSRP1    |
| E2F4 | SSSCA1   |
| E2F4 | ST20-AS1 |
| E2F4 | STAT2    |
| E2F4 | STAT5A   |
| E2F4 | STAT6    |
| E2F4 | STIP1    |
| E2F4 | STK25    |
| E2F4 | STK32C   |
| E2F4 | STOML2   |
| E2F4 | STRAP    |
| E2F4 | STUB1    |
| E2F4 | STX10    |
| E2F4 | STX11    |
| E2F4 | STX4     |
| E2F4 | SUB1     |
| E2F4 | SUCLG1   |
| E2F4 | SUCLG2   |
| E2F4 | SUGT1    |
| E2F4 | SUM01    |
| E2F4 | SUM02    |
| E2F4 | SUPT16H  |
| E2F4 | SUPT3H   |

|      |         |
|------|---------|
| E2F4 | SUPT4H1 |
| E2F4 | SUPT5H  |
| E2F4 | SURF2   |
| E2F4 | SURF6   |
| E2F4 | SYAP1   |
| E2F4 | SYMPK   |
| E2F4 | SYNCRIP |
| E2F4 | SYNJ2   |
| E2F4 | SZRD1   |
| E2F4 | TAF11   |
| E2F4 | TAF12   |
| E2F4 | TAF15   |
| E2F4 | TAF1D   |
| E2F4 | TAF3    |
| E2F4 | TAF7    |
| E2F4 | TAF9    |
| E2F4 | TAGLN2  |
| E2F4 | TALD01  |
| E2F4 | TANK    |
| E2F4 | TARBP2  |
| E2F4 | TARS    |
| E2F4 | TARS2   |
| E2F4 | TASP1   |
| E2F4 | TATDN1  |
| E2F4 | TBC1D7  |
| E2F4 | TBCA    |
| E2F4 | TBL1X   |
| E2F4 | TBL3    |
| E2F4 | TBPL1   |
| E2F4 | TBRG1   |
| E2F4 | TBRG4   |
| E2F4 | TBXAS1  |
| E2F4 | TCERG1  |
| E2F4 | TCF25   |
| E2F4 | TCOF1   |
| E2F4 | TCP1    |
| E2F4 | TDRD3   |
| E2F4 | TES     |
| E2F4 | TEX10   |
| E2F4 | TEX261  |
| E2F4 | TFB2M   |
| E2F4 | TFE3    |
| E2F4 | TFG     |
| E2F4 | TFRC    |
| E2F4 | TGFB1   |
| E2F4 | TGS1    |
| E2F4 | THAP4   |
| E2F4 | THAP5   |
| E2F4 | THAP7   |
| E2F4 | THOC3   |

|      |             |
|------|-------------|
| E2F4 | THOP1       |
| E2F4 | THUMPD2     |
| E2F4 | THUMPD3     |
| E2F4 | THUMPD3-AS1 |
| E2F4 | TIGAR       |
| E2F4 | TIMM10      |
| E2F4 | TIMM10B     |
| E2F4 | TIMM13      |
| E2F4 | TIMM17A     |
| E2F4 | TIMM21      |
| E2F4 | TIMM22      |
| E2F4 | TIMM23      |
| E2F4 | TIMM8A      |
| E2F4 | TIMM8B      |
| E2F4 | TIMMDC1     |
| E2F4 | TINF2       |
| E2F4 | TIPRL       |
| E2F4 | TM2D1       |
| E2F4 | TM2D2       |
| E2F4 | TM9SF3      |
| E2F4 | TMA7        |
| E2F4 | TMBIM4      |
| E2F4 | TMBIM6      |
| E2F4 | TMC01       |
| E2F4 | TMED2       |
| E2F4 | TMEM109     |
| E2F4 | TMEM115     |
| E2F4 | TMEM126A    |
| E2F4 | TMEM128     |
| E2F4 | TMEM138     |
| E2F4 | TMEM14B     |
| E2F4 | TMEM167A    |
| E2F4 | TMEM189     |
| E2F4 | TMEM192     |
| E2F4 | TMEM199     |
| E2F4 | TMEM208     |
| E2F4 | TMEM209     |
| E2F4 | TMEM216     |
| E2F4 | TMEM222     |
| E2F4 | TMEM230     |
| E2F4 | TMEM248     |
| E2F4 | TMEM251     |
| E2F4 | TMEM39A     |
| E2F4 | TMEM44      |
| E2F4 | TMEM50A     |
| E2F4 | TMEM60      |
| E2F4 | TMEM69      |
| E2F4 | TMEM9B      |
| E2F4 | TMX1        |
| E2F4 | TMX2        |

|      |              |
|------|--------------|
| E2F4 | TNIP1        |
| E2F4 | TNIP2        |
| E2F4 | TNP02        |
| E2F4 | TNP03        |
| E2F4 | TOB2         |
| E2F4 | TOMM20       |
| E2F4 | TOMM22       |
| E2F4 | TOMM40       |
| E2F4 | TOMM40L      |
| E2F4 | TOMM5        |
| E2F4 | TOMM7        |
| E2F4 | TOP1         |
| E2F4 | TOP3B        |
| E2F4 | TOR1A        |
| E2F4 | TOX4         |
| E2F4 | TP53         |
| E2F4 | TPGS1        |
| E2F4 | TPM3         |
| E2F4 | TPRKB        |
| E2F4 | TPT1         |
| E2F4 | TRA2B        |
| E2F4 | TRAF3IP2-AS1 |
| E2F4 | TRAF4        |
| E2F4 | TRAF7        |
| E2F4 | TRAPPC3      |
| E2F4 | TRAPPC4      |
| E2F4 | TRIM27       |
| E2F4 | TRIM4        |
| E2F4 | TRIM44       |
| E2F4 | TRMT1        |
| E2F4 | TRMT10C      |
| E2F4 | TRMT112      |
| E2F4 | TRMT2A       |
| E2F4 | TRMT6        |
| E2F4 | TRNT1        |
| E2F4 | TROVE2       |
| E2F4 | TRUB2        |
| E2F4 | TSC2         |
| E2F4 | TSC22D2      |
| E2F4 | TSC22D4      |
| E2F4 | TSEN15       |
| E2F4 | TSG101       |
| E2F4 | TSR1         |
| E2F4 | TSSC4        |
| E2F4 | TSTA3        |
| E2F4 | TTC1         |
| E2F4 | TTC27        |
| E2F4 | TTC33        |
| E2F4 | TTI2         |
| E2F4 | TUBA1C       |

|      |         |
|------|---------|
| E2F4 | TUBE1   |
| E2F4 | TUFM    |
| E2F4 | TUSC2   |
| E2F4 | TWF1    |
| E2F4 | TWF2    |
| E2F4 | TXN     |
| E2F4 | TXN2    |
| E2F4 | TXNDC17 |
| E2F4 | TXNDC9  |
| E2F4 | TXNL1   |
| E2F4 | TXNL4B  |
| E2F4 | TXNRD1  |
| E2F4 | TYSND1  |
| E2F4 | U2AF1L5 |
| E2F4 | U2AF2   |
| E2F4 | U2SURP  |
| E2F4 | UBA1    |
| E2F4 | UBA2    |
| E2F4 | UBA52   |
| E2F4 | UBAC1   |
| E2F4 | UBAC2   |
| E2F4 | UBALD2  |
| E2F4 | UBE2B   |
| E2F4 | UBE2D2  |
| E2F4 | UBE2D3  |
| E2F4 | UBE2E3  |
| E2F4 | UBE2F   |
| E2F4 | UBE2G2  |
| E2F4 | UBE2I   |
| E2F4 | UBE2J2  |
| E2F4 | UBE2K   |
| E2F4 | UBE2L3  |
| E2F4 | UBE2L6  |
| E2F4 | UBE2M   |
| E2F4 | UBE2N   |
| E2F4 | UBE2Q1  |
| E2F4 | UBE2V2  |
| E2F4 | UBE3A   |
| E2F4 | UBIAD1  |
| E2F4 | UBL5    |
| E2F4 | UBLCP1  |
| E2F4 | UBOX5   |
| E2F4 | UBR7    |
| E2F4 | UBTF    |
| E2F4 | UBXN1   |
| E2F4 | UCHL3   |
| E2F4 | UCHL5   |
| E2F4 | UFC1    |
| E2F4 | UFM1    |
| E2F4 | UGDH    |



|      |         |
|------|---------|
| E2F4 | UMPS    |
| E2F4 | UNC50   |
| E2F4 | UPF2    |
| E2F4 | UPF3A   |
| E2F4 | UQCC2   |
| E2F4 | UQCR11  |
| E2F4 | UQCRC2  |
| E2F4 | UQCRFS1 |
| E2F4 | UQCRQ   |
| E2F4 | URM1    |
| E2F4 | UR0S    |
| E2F4 | USB1    |
| E2F4 | USE1    |
| E2F4 | USP16   |
| E2F4 | USP39   |
| E2F4 | USP5    |
| E2F4 | USP6NL  |
| E2F4 | UTP11   |
| E2F4 | UTP14A  |
| E2F4 | UTP18   |
| E2F4 | UTP23   |
| E2F4 | UTP4    |
| E2F4 | UTP6    |
| E2F4 | UXT     |
| E2F4 | VAMP8   |
| E2F4 | VASP    |
| E2F4 | VCP     |
| E2F4 | VDAC1   |
| E2F4 | VDAC3   |
| E2F4 | VEGFA   |
| E2F4 | VMA21   |
| E2F4 | VMP1    |
| E2F4 | VPS18   |
| E2F4 | VPS26A  |
| E2F4 | VPS4B   |
| E2F4 | VPS72   |
| E2F4 | VRK1    |
| E2F4 | VTA1    |
| E2F4 | VTI1A   |
| E2F4 | VTI1B   |
| E2F4 | VWCE    |
| E2F4 | WAPL    |
| E2F4 | WARS    |
| E2F4 | WDR1    |
| E2F4 | WDR12   |
| E2F4 | WDR18   |
| E2F4 | WDR24   |
| E2F4 | WDR25   |
| E2F4 | WDR3    |
| E2F4 | WDR33   |

|      |          |
|------|----------|
| E2F4 | WDR4     |
| E2F4 | WDR43    |
| E2F4 | WDR46    |
| E2F4 | WDR5     |
| E2F4 | WDR55    |
| E2F4 | WDR61    |
| E2F4 | WDR70    |
| E2F4 | WDR74    |
| E2F4 | WDR77    |
| E2F4 | WDR83    |
| E2F4 | WDR830S  |
| E2F4 | WRAP53   |
| E2F4 | WSB2     |
| E2F4 | WTAP     |
| E2F4 | XP01     |
| E2F4 | XP0T     |
| E2F4 | XPR1     |
| E2F4 | XRCC5    |
| E2F4 | XRN2     |
| E2F4 | XXYLT1   |
| E2F4 | YARS2    |
| E2F4 | YBX1     |
| E2F4 | YIPF4    |
| E2F4 | YIPF6    |
| E2F4 | YRDC     |
| E2F4 | YTHDF2   |
| E2F4 | YWHAB    |
| E2F4 | YWHAE    |
| E2F4 | YWHAQ    |
| E2F4 | YWHAZ    |
| E2F4 | ZBED5    |
| E2F4 | ZBTB2    |
| E2F4 | ZBTB32   |
| E2F4 | ZBTB6    |
| E2F4 | ZC3H13   |
| E2F4 | ZC3H15   |
| E2F4 | ZDHHC3   |
| E2F4 | ZDHHC7   |
| E2F4 | ZFAND5   |
| E2F4 | ZFAS1    |
| E2F4 | ZKSCAN5  |
| E2F4 | ZMAT2    |
| E2F4 | ZMPSTE24 |
| E2F4 | ZNF146   |
| E2F4 | ZNF165   |
| E2F4 | ZNF22    |
| E2F4 | ZNF263   |
| E2F4 | ZNF281   |
| E2F4 | ZNF330   |
| E2F4 | ZNF480   |

|      |              |
|------|--------------|
| E2F4 | ZNF485       |
| E2F4 | ZNF518A      |
| E2F4 | ZNF562       |
| E2F4 | ZNF586       |
| E2F4 | ZNF593       |
| E2F4 | ZNF622       |
| E2F4 | ZNF641       |
| E2F4 | ZNF644       |
| E2F4 | ZNF672       |
| E2F4 | ZNF692       |
| E2F4 | ZNF706       |
| E2F4 | ZNF740       |
| E2F4 | ZNF75A       |
| E2F4 | ZNF780A      |
| E2F4 | ZNF787       |
| E2F4 | ZNF814       |
| E2F4 | ZNF830       |
| E2F4 | ZNHIT2       |
| E2F4 | ZNHIT6       |
| E2F4 | ZPR1         |
| E2F4 | ZRANB2       |
| E2F4 | ZSCAN16-AS1  |
| E2F6 | ABCF1        |
| E2F6 | ADRM1        |
| E2F6 | ADSS         |
| E2F6 | ALKBH2       |
| E2F6 | APBA3        |
| E2F6 | APBB2        |
| E2F6 | APRT         |
| E2F6 | ARF6         |
| E2F6 | ARHGEF2      |
| E2F6 | ARL6IP5      |
| E2F6 | ARMC7        |
| E2F6 | ATAD3A       |
| E2F6 | ATP1B3       |
| E2F6 | ATP2C1       |
| E2F6 | ATXN2L       |
| E2F6 | B9D1         |
| E2F6 | BCAP31       |
| E2F6 | BNIP1        |
| E2F6 | BOLA2-SMG1P6 |
| E2F6 | BZW1         |
| E2F6 | C20orf27     |
| E2F6 | C22orf34     |
| E2F6 | C8orf33      |
| E2F6 | CAB39        |
| E2F6 | CAMK1        |
| E2F6 | CBWD1        |
| E2F6 | CBX6         |
| E2F6 | CCDC124      |

|      |          |
|------|----------|
| E2F6 | CCDC15   |
| E2F6 | CCDC6    |
| E2F6 | CCDC71L  |
| E2F6 | CCNG2    |
| E2F6 | CCT7     |
| E2F6 | CDC123   |
| E2F6 | CFAP97   |
| E2F6 | CHRNA1   |
| E2F6 | CHST11   |
| E2F6 | CMC2     |
| E2F6 | CMSS1    |
| E2F6 | CN0T4    |
| E2F6 | COX20    |
| E2F6 | CR2      |
| E2F6 | CSNK1D   |
| E2F6 | CSNK2A1  |
| E2F6 | CTDP1    |
| E2F6 | CTNNB1   |
| E2F6 | CTPS1    |
| E2F6 | CUL1     |
| E2F6 | CUL2     |
| E2F6 | CYCS     |
| E2F6 | DCAF16   |
| E2F6 | DCTPP1   |
| E2F6 | DDX18    |
| E2F6 | DDX19A   |
| E2F6 | DDX21    |
| E2F6 | DDX52    |
| E2F6 | DERL3    |
| E2F6 | DGAT2    |
| E2F6 | DHCR7    |
| E2F6 | DHRS3    |
| E2F6 | DKC1     |
| E2F6 | DNAJC12  |
| E2F6 | DNPEP    |
| E2F6 | DNTTIP2  |
| E2F6 | DOHH     |
| E2F6 | DPYSL2   |
| E2F6 | DYNLT3   |
| E2F6 | E2F6     |
| E2F6 | EBNA1BP2 |
| E2F6 | EBPL     |
| E2F6 | EEF1E1   |
| E2F6 | EGLN2    |
| E2F6 | EIF2B2   |
| E2F6 | EIF2S1   |
| E2F6 | EIF3J    |
| E2F6 | EIF4A1   |
| E2F6 | EIF4G2   |
| E2F6 | EMC1     |

|      |            |
|------|------------|
| E2F6 | EMC10      |
| E2F6 | EMG1       |
| E2F6 | EN01       |
| E2F6 | ERCC6L2    |
| E2F6 | ERI3       |
| E2F6 | EXOSC2     |
| E2F6 | EXOSC4     |
| E2F6 | FABP5      |
| E2F6 | FAM104B    |
| E2F6 | FAM114A2   |
| E2F6 | FAM136A    |
| E2F6 | FAM96B     |
| E2F6 | FCER2      |
| E2F6 | FH         |
| E2F6 | GADD45GIP1 |
| E2F6 | GAR1       |
| E2F6 | GARS       |
| E2F6 | GART       |
| E2F6 | GAS6       |
| E2F6 | GFM1       |
| E2F6 | GNL3       |
| E2F6 | GPATCH4    |
| E2F6 | GRWD1      |
| E2F6 | GSPT2      |
| E2F6 | H3F3B      |
| E2F6 | HGH1       |
| E2F6 | HNRNPDL    |
| E2F6 | HRAS       |
| E2F6 | HSP90AB1   |
| E2F6 | HSPA6      |
| E2F6 | HSPA8      |
| E2F6 | HSPA9      |
| E2F6 | HSPBAP1    |
| E2F6 | HSPD1      |
| E2F6 | HSPE1      |
| E2F6 | HYI        |
| E2F6 | ID3        |
| E2F6 | IFRD1      |
| E2F6 | IFRD2      |
| E2F6 | IGFBP4     |
| E2F6 | IMMP2L     |
| E2F6 | INTS10     |
| E2F6 | IP04       |
| E2F6 | IRF2BP2    |
| E2F6 | ISCA1      |
| E2F6 | JAGN1      |
| E2F6 | KAT8       |
| E2F6 | KDM5B      |
| E2F6 | KLF13      |
| E2F6 | LARP1B     |

|      |           |
|------|-----------|
| E2F6 | LDHA      |
| E2F6 | LINC00667 |
| E2F6 | LINC01184 |
| E2F6 | LINS1     |
| E2F6 | LRRC42    |
| E2F6 | LSM12     |
| E2F6 | LTV1      |
| E2F6 | LY75      |
| E2F6 | LY9       |
| E2F6 | LYAR      |
| E2F6 | MAEA      |
| E2F6 | MAFB      |
| E2F6 | MALSU1    |
| E2F6 | MAP1B     |
| E2F6 | MAP4K5    |
| E2F6 | MCCC2     |
| E2F6 | MDN1      |
| E2F6 | MEST      |
| E2F6 | METTLL13  |
| E2F6 | MFSD13A   |
| E2F6 | MICU2     |
| E2F6 | MIR155HG  |
| E2F6 | MRM1      |
| E2F6 | MRPL12    |
| E2F6 | MRPL14    |
| E2F6 | MRPL20    |
| E2F6 | MRPL21    |
| E2F6 | MRPL3     |
| E2F6 | MRPL47    |
| E2F6 | MRPS18A   |
| E2F6 | MRPS30    |
| E2F6 | MRT04     |
| E2F6 | MST01     |
| E2F6 | MTHFD1L   |
| E2F6 | MYC       |
| E2F6 | MY06      |
| E2F6 | MY09A     |
| E2F6 | MZF1-AS1  |
| E2F6 | NAA20     |
| E2F6 | NADK      |
| E2F6 | NAXE      |
| E2F6 | NCBP2     |
| E2F6 | NCL       |
| E2F6 | NCLN      |
| E2F6 | NDUFAF4   |
| E2F6 | NFAT5     |
| E2F6 | NFE2L1    |
| E2F6 | NFE2L2    |
| E2F6 | NFKB1     |
| E2F6 | NHP2      |

|      |          |
|------|----------|
| E2F6 | NIFK     |
| E2F6 | NLE1     |
| E2F6 | NME1     |
| E2F6 | NOC2L    |
| E2F6 | NOL9     |
| E2F6 | NOLC1    |
| E2F6 | NOP58    |
| E2F6 | NPM1     |
| E2F6 | NPW      |
| E2F6 | NR2F6    |
| E2F6 | NSF      |
| E2F6 | NUDT14   |
| E2F6 | NUDT2    |
| E2F6 | NUDT5    |
| E2F6 | NUP214   |
| E2F6 | NUP35    |
| E2F6 | NUP88    |
| E2F6 | NUP93    |
| E2F6 | ODC1     |
| E2F6 | OGFOD2   |
| E2F6 | ORMDL1   |
| E2F6 | PA2G4    |
| E2F6 | PABPC4   |
| E2F6 | PAK1IP1  |
| E2F6 | PALLD    |
| E2F6 | PCCB     |
| E2F6 | PDCD5    |
| E2F6 | PEMT     |
| E2F6 | PHB      |
| E2F6 | PIBF1    |
| E2F6 | PIKFYVE  |
| E2F6 | PIP5K1A  |
| E2F6 | PLEKHG2  |
| E2F6 | POGK     |
| E2F6 | POLD2    |
| E2F6 | POLR2I   |
| E2F6 | POLR2K   |
| E2F6 | POLR3C   |
| E2F6 | POLR3H   |
| E2F6 | PPAN     |
| E2F6 | PPFIA1   |
| E2F6 | PPP1R14B |
| E2F6 | PRDX1    |
| E2F6 | PRPF4    |
| E2F6 | PSMA3    |
| E2F6 | PSMA5    |
| E2F6 | PSMB1    |
| E2F6 | PSMB6    |
| E2F6 | PSMC3    |
| E2F6 | PSMC6    |

|      |          |
|------|----------|
| E2F6 | PSMD1    |
| E2F6 | PSMD14   |
| E2F6 | PSMD7    |
| E2F6 | PSME3    |
| E2F6 | PTPN6    |
| E2F6 | PTPRE    |
| E2F6 | PUM1     |
| E2F6 | PUM3     |
| E2F6 | PYCR1    |
| E2F6 | PYCR2    |
| E2F6 | PYURF    |
| E2F6 | RALBP1   |
| E2F6 | RAN      |
| E2F6 | RARS     |
| E2F6 | RBM18    |
| E2F6 | RBM28    |
| E2F6 | RCN1     |
| E2F6 | RDH14    |
| E2F6 | REST     |
| E2F6 | RHBDD1   |
| E2F6 | RIPK2    |
| E2F6 | RNF115   |
| E2F6 | RNF145   |
| E2F6 | RNH1     |
| E2F6 | RPL22L1  |
| E2F6 | RPL7L1   |
| E2F6 | RPRD1A   |
| E2F6 | RRP1B    |
| E2F6 | RRP9     |
| E2F6 | RSAD1    |
| E2F6 | RSL1D1   |
| E2F6 | RWDD1    |
| E2F6 | RWDD2A   |
| E2F6 | RXRB     |
| E2F6 | SBDS     |
| E2F6 | SCAF1    |
| E2F6 | SCFD2    |
| E2F6 | SCNM1    |
| E2F6 | SC01     |
| E2F6 | SDAD1    |
| E2F6 | SDHAF1   |
| E2F6 | SEL1L    |
| E2F6 | SERPINE2 |
| E2F6 | SESN2    |
| E2F6 | SFSWAP   |
| E2F6 | SHQ1     |
| E2F6 | SKAP1    |
| E2F6 | SLC26A2  |
| E2F6 | SLC39A4  |
| E2F6 | SLC39A6  |



|      |          |
|------|----------|
| E2F6 | SLC7A5   |
| E2F6 | SLC9B2   |
| E2F6 | SLF1     |
| E2F6 | SLIRP    |
| E2F6 | SLK      |
| E2F6 | SMIM12   |
| E2F6 | SNAPC5   |
| E2F6 | SORD     |
| E2F6 | SRGAP2C  |
| E2F6 | SRM      |
| E2F6 | SRSF1    |
| E2F6 | SRSF2    |
| E2F6 | SRSF3    |
| E2F6 | SSBP1    |
| E2F6 | SSSCA1   |
| E2F6 | STAT6    |
| E2F6 | STIM1    |
| E2F6 | STRADB   |
| E2F6 | STX16    |
| E2F6 | SUPT3H   |
| E2F6 | SYMPK    |
| E2F6 | TARS     |
| E2F6 | TBC1D10B |
| E2F6 | TBPL1    |
| E2F6 | TES      |
| E2F6 | TET2     |
| E2F6 | TFAP4    |
| E2F6 | TFB1M    |
| E2F6 | TFEC     |
| E2F6 | TFPI2    |
| E2F6 | THADA    |
| E2F6 | THUMPD3  |
| E2F6 | TIMM13   |
| E2F6 | TIMM23B  |
| E2F6 | TIMM8A   |
| E2F6 | TM2D3    |
| E2F6 | TMEM126A |
| E2F6 | TMEM161B |
| E2F6 | TMEM167B |
| E2F6 | TMEM230  |
| E2F6 | TMEM267  |
| E2F6 | TMX2     |
| E2F6 | TNP01    |
| E2F6 | TOMM40   |
| E2F6 | TPP2     |
| E2F6 | TSEN2    |
| E2F6 | TSPAN4   |
| E2F6 | TSR1     |
| E2F6 | TSR2     |
| E2F6 | TXN      |

|      |           |
|------|-----------|
| E2F6 | TXNDC5    |
| E2F6 | TXNL1     |
| E2F6 | U2SURP    |
| E2F6 | UACA      |
| E2F6 | UBA5      |
| E2F6 | UBE2D4    |
| E2F6 | UBXN2B    |
| E2F6 | URB2      |
| E2F6 | URI1      |
| E2F6 | UTP14A    |
| E2F6 | UTP6      |
| E2F6 | UVRAG     |
| E2F6 | WDR12     |
| E2F6 | WDR46     |
| E2F6 | WDR74     |
| E2F6 | XRCC4     |
| E2F6 | XXYLT1    |
| E2F6 | YBX1      |
| E2F6 | YBX3      |
| E2F6 | YWHAG     |
| E2F6 | ZBTB17    |
| E2F6 | ZHX1      |
| E2F6 | ZNF350    |
| E2F6 | ZNF460    |
| E2F6 | ZNF507    |
| E2F6 | ZNF524    |
| E2F6 | ZNF669    |
| E2F6 | ZNFX1     |
| E2F7 | ACSL3     |
| E2F7 | ACSL5     |
| E2F7 | ACTA2     |
| E2F7 | ADSS      |
| E2F7 | AEN       |
| E2F7 | AGFG1     |
| E2F7 | AGL       |
| E2F7 | AGPAT2    |
| E2F7 | AP1S2     |
| E2F7 | AP5M1     |
| E2F7 | ASB16-AS1 |
| E2F7 | ASF1B     |
| E2F7 | ATAD2     |
| E2F7 | ATF3      |
| E2F7 | ATP2A3    |
| E2F7 | B3GLCT    |
| E2F7 | B3GNT2    |
| E2F7 | BBC3      |
| E2F7 | BCL10     |
| E2F7 | BCL6      |
| E2F7 | BIN1      |
| E2F7 | BTBD7     |

|      |          |
|------|----------|
| E2F7 | BTG3     |
| E2F7 | C16orf74 |
| E2F7 | C1GALT1  |
| E2F7 | C7orf50  |
| E2F7 | CAPNS1   |
| E2F7 | CARHSP1  |
| E2F7 | CARM1    |
| E2F7 | CCDC141  |
| E2F7 | CCDC22   |
| E2F7 | CCNE2    |
| E2F7 | CCNG1    |
| E2F7 | CCP110   |
| E2F7 | CD2AP    |
| E2F7 | CD70     |
| E2F7 | CDC45    |
| E2F7 | CDC6     |
| E2F7 | CDCA5    |
| E2F7 | CDIP1    |
| E2F7 | CDKN1A   |
| E2F7 | CDKN2AIP |
| E2F7 | CDKN2C   |
| E2F7 | CENPU    |
| E2F7 | CHEK2    |
| E2F7 | CHFR     |
| E2F7 | CIC      |
| E2F7 | CLPX     |
| E2F7 | CN0T1    |
| E2F7 | C0Q7     |
| E2F7 | CTDSPL2  |
| E2F7 | CTNNAL1  |
| E2F7 | CTPS1    |
| E2F7 | CYC1     |
| E2F7 | DAPP1    |
| E2F7 | DCP1B    |
| E2F7 | DDX20    |
| E2F7 | DDX49    |
| E2F7 | DEK      |
| E2F7 | DHFR     |
| E2F7 | DNA2     |
| E2F7 | DNAJC21  |
| E2F7 | DNAJC9   |
| E2F7 | DSCC1    |
| E2F7 | DUSP23   |
| E2F7 | DUT      |
| E2F7 | E2F1     |
| E2F7 | E2F7     |
| E2F7 | EIF4H    |
| E2F7 | EIF5A2   |
| E2F7 | EPB41    |
| E2F7 | ESC02    |

|      |          |
|------|----------|
| E2F7 | FAM111B  |
| E2F7 | FAM81A   |
| E2F7 | FBX042   |
| E2F7 | FBX05    |
| E2F7 | FDXR     |
| E2F7 | FEN1     |
| E2F7 | FIGNL1   |
| E2F7 | FKBP5    |
| E2F7 | FKRP     |
| E2F7 | GADD45A  |
| E2F7 | GAK      |
| E2F7 | GEMIN8   |
| E2F7 | GFOD2    |
| E2F7 | GLUD1    |
| E2F7 | GMPS     |
| E2F7 | GPANK1   |
| E2F7 | GTF2IRD2 |
| E2F7 | GXYLT1   |
| E2F7 | HACD2    |
| E2F7 | HAUS6    |
| E2F7 | HDAC8    |
| E2F7 | HDAC9    |
| E2F7 | HIP1R    |
| E2F7 | HIST1H1B |
| E2F7 | HPCAL1   |
| E2F7 | IDH2     |
| E2F7 | IFNLR1   |
| E2F7 | ING5     |
| E2F7 | KDM2B    |
| E2F7 | KDM3B    |
| E2F7 | KEAP1    |
| E2F7 | KRI1     |
| E2F7 | KYNU     |
| E2F7 | LAPTM5   |
| E2F7 | LARP7    |
| E2F7 | LIG1     |
| E2F7 | LMCD1    |
| E2F7 | LMNA     |
| E2F7 | LMNB1    |
| E2F7 | LRIF1    |
| E2F7 | LTN1     |
| E2F7 | LZTS2    |
| E2F7 | MACROD2  |
| E2F7 | MAD1L1   |
| E2F7 | MAZ      |
| E2F7 | MCM2     |
| E2F7 | MCM7     |
| E2F7 | MDM2     |
| E2F7 | MED28    |
| E2F7 | METTLL15 |

|      |         |
|------|---------|
| E2F7 | MFGE8   |
| E2F7 | MFSD11  |
| E2F7 | MFSD13A |
| E2F7 | MIA3    |
| E2F7 | MIDN    |
| E2F7 | MIOS    |
| E2F7 | MORC4   |
| E2F7 | MRPL49  |
| E2F7 | MSL1    |
| E2F7 | MTHFR   |
| E2F7 | MTRF1   |
| E2F7 | MTURN   |
| E2F7 | MVB12A  |
| E2F7 | MYB     |
| E2F7 | MYL12B  |
| E2F7 | MYNN    |
| E2F7 | MYO9B   |
| E2F7 | NAA20   |
| E2F7 | NCAPD3  |
| E2F7 | NCOA4   |
| E2F7 | NEMP2   |
| E2F7 | NFYB    |
| E2F7 | NINJ2   |
| E2F7 | NKAP    |
| E2F7 | NLRP4   |
| E2F7 | NME7    |
| E2F7 | NMT1    |
| E2F7 | NMU     |
| E2F7 | NOL9    |
| E2F7 | NOTCH4  |
| E2F7 | NR2C2AP |
| E2F7 | NT5DC1  |
| E2F7 | NUFIP2  |
| E2F7 | ORC1    |
| E2F7 | PARP2   |
| E2F7 | PBRM1   |
| E2F7 | PCGF6   |
| E2F7 | PCNA    |
| E2F7 | PCNT    |
| E2F7 | PDCL    |
| E2F7 | PDS5A   |
| E2F7 | PHPT1   |
| E2F7 | PICALM  |
| E2F7 | PKMYT1  |
| E2F7 | PLK3    |
| E2F7 | PLSCR1  |
| E2F7 | PNPLA8  |
| E2F7 | POLA1   |
| E2F7 | POLD1   |
| E2F7 | POR     |

|      |         |
|------|---------|
| E2F7 | PPDPF   |
| E2F7 | PPM1A   |
| E2F7 | PPM1M   |
| E2F7 | PPP1R8  |
| E2F7 | PPP3R1  |
| E2F7 | PRC1    |
| E2F7 | PRPS2   |
| E2F7 | PRR14L  |
| E2F7 | PRRC2A  |
| E2F7 | PTPRA   |
| E2F7 | PUSL1   |
| E2F7 | PYGB    |
| E2F7 | RABIF   |
| E2F7 | RABL6   |
| E2F7 | RAD9A   |
| E2F7 | RARA    |
| E2F7 | RASSF7  |
| E2F7 | RBM4B   |
| E2F7 | RFC1    |
| E2F7 | RFC5    |
| E2F7 | RIF1    |
| E2F7 | RNMT    |
| E2F7 | RNPEPL1 |
| E2F7 | RPP30   |
| E2F7 | RRP7A   |
| E2F7 | RSBN1L  |
| E2F7 | RUFY1   |
| E2F7 | RXRB    |
| E2F7 | SAE1    |
| E2F7 | SAFB2   |
| E2F7 | SAMD10  |
| E2F7 | SARNP   |
| E2F7 | SCCPDH  |
| E2F7 | SELL    |
| E2F7 | SEPT8   |
| E2F7 | SH2B1   |
| E2F7 | SH3BP1  |
| E2F7 | SLC2A5  |
| E2F7 | SLC35A5 |
| E2F7 | SLC35C2 |
| E2F7 | SLC38A9 |
| E2F7 | SLC41A1 |
| E2F7 | SLC43A2 |
| E2F7 | SMAD2   |
| E2F7 | SMAD3   |
| E2F7 | SMC2    |
| E2F7 | SMC04   |
| E2F7 | SNAP29  |
| E2F7 | SNRNP35 |
| E2F7 | SP1     |

|      |          |
|------|----------|
| E2F7 | SPPL2A   |
| E2F7 | SRPK1    |
| E2F7 | SRRT     |
| E2F7 | STAMBPL1 |
| E2F7 | SZRD1    |
| E2F7 | TAF1     |
| E2F7 | TANG02   |
| E2F7 | TCAIM    |
| E2F7 | TFDP2    |
| E2F7 | THRA     |
| E2F7 | THUMPD3  |
| E2F7 | TLE4     |
| E2F7 | TLR10    |
| E2F7 | TMC03    |
| E2F7 | TMEM206  |
| E2F7 | TMP0     |
| E2F7 | TOE1     |
| E2F7 | TOPBP1   |
| E2F7 | TPGS1    |
| E2F7 | TPRA1    |
| E2F7 | TRMT11   |
| E2F7 | TSPAN14  |
| E2F7 | TTC39C   |
| E2F7 | TUBB6    |
| E2F7 | TYMS     |
| E2F7 | UBXN11   |
| E2F7 | UMAD1    |
| E2F7 | UPF2     |
| E2F7 | USP1     |
| E2F7 | USP12    |
| E2F7 | UTP20    |
| E2F7 | VPS29    |
| E2F7 | VPS35    |
| E2F7 | WDPCP    |
| E2F7 | WDR5     |
| E2F7 | WDR76    |
| E2F7 | XPC      |
| E2F7 | XRCC1    |
| E2F7 | ZC3H7A   |
| E2F7 | ZDHHC24  |
| E2F7 | ZNF292   |
| E2F7 | ZNF430   |
| E2F7 | ZNF638   |
| E2F7 | ZNF804A  |
| E2F8 | ACAA2    |
| E2F8 | ACTG1    |
| E2F8 | ACTL6A   |
| E2F8 | ACTN4    |
| E2F8 | ADCK2    |
| E2F8 | ADD3     |

|      |          |
|------|----------|
| E2F8 | ADNP2    |
| E2F8 | AGTPBP1  |
| E2F8 | AHI1     |
| E2F8 | AK3      |
| E2F8 | AK4      |
| E2F8 | ANAPC11  |
| E2F8 | ANP32B   |
| E2F8 | AP1S1    |
| E2F8 | AP2S1    |
| E2F8 | APEX2    |
| E2F8 | APIP     |
| E2F8 | AP00     |
| E2F8 | APRT     |
| E2F8 | ARF6     |
| E2F8 | ARGLU1   |
| E2F8 | ARHGAP33 |
| E2F8 | ARMC1    |
| E2F8 | ARNT     |
| E2F8 | ASAP1    |
| E2F8 | ASF1B    |
| E2F8 | ASPSCR1  |
| E2F8 | ASRGL1   |
| E2F8 | ASTE1    |
| E2F8 | ATAD2    |
| E2F8 | ATF7IP2  |
| E2F8 | ATG10    |
| E2F8 | ATL2     |
| E2F8 | ATP10D   |
| E2F8 | ATP23    |
| E2F8 | ATP6V1A  |
| E2F8 | AURKB    |
| E2F8 | B3GLCT   |
| E2F8 | BAZ1B    |
| E2F8 | BAZ2A    |
| E2F8 | BCLAF1   |
| E2F8 | BDH1     |
| E2F8 | BID      |
| E2F8 | BLOC1S1  |
| E2F8 | BRD3     |
| E2F8 | BRMS1L   |
| E2F8 | BRWD1    |
| E2F8 | C11orf24 |
| E2F8 | C14orf93 |
| E2F8 | C16orf74 |
| E2F8 | C19orf48 |
| E2F8 | C21orf58 |
| E2F8 | C2orf74  |
| E2F8 | C4orf46  |
| E2F8 | C6orf106 |
| E2F8 | C6orf136 |



|      |          |
|------|----------|
| E2F8 | C9orf16  |
| E2F8 | CAB39    |
| E2F8 | CACNA1A  |
| E2F8 | CADPS    |
| E2F8 | CAMTA1   |
| E2F8 | CARHSP1  |
| E2F8 | CBL      |
| E2F8 | CBLB     |
| E2F8 | CBLL1    |
| E2F8 | CBX2     |
| E2F8 | CBX3     |
| E2F8 | CBX5     |
| E2F8 | CCDC102A |
| E2F8 | CCDC167  |
| E2F8 | CCDC171  |
| E2F8 | CCDC22   |
| E2F8 | CCDC69   |
| E2F8 | CCDC82   |
| E2F8 | CCHCR1   |
| E2F8 | CCNA2    |
| E2F8 | CCND3    |
| E2F8 | CCP110   |
| E2F8 | CD180    |
| E2F8 | CDC23    |
| E2F8 | CDC25A   |
| E2F8 | CDC42SE2 |
| E2F8 | CDC45    |
| E2F8 | CDC5L    |
| E2F8 | CDC6     |
| E2F8 | CDC7     |
| E2F8 | CDCA2    |
| E2F8 | CDCA5    |
| E2F8 | CDCA7L   |
| E2F8 | CDK1     |
| E2F8 | CDKN2A   |
| E2F8 | CDKN2AIP |
| E2F8 | CDKN2D   |
| E2F8 | CDKN3    |
| E2F8 | CDR2     |
| E2F8 | CDT1     |
| E2F8 | CENPK    |
| E2F8 | CENPM    |
| E2F8 | CENPN    |
| E2F8 | CENPO    |
| E2F8 | CENPQ    |
| E2F8 | CEP128   |
| E2F8 | CEP152   |
| E2F8 | CEP295   |
| E2F8 | CEP57    |
| E2F8 | CEP68    |

|      |         |
|------|---------|
| E2F8 | CHAF1A  |
| E2F8 | CHAF1B  |
| E2F8 | CHERP   |
| E2F8 | CIITA   |
| E2F8 | CIT     |
| E2F8 | CKAP2L  |
| E2F8 | CKS1B   |
| E2F8 | CLSPN   |
| E2F8 | CMPK2   |
| E2F8 | CNTLN   |
| E2F8 | COPS3   |
| E2F8 | COX8A   |
| E2F8 | CPSF1   |
| E2F8 | CPSF7   |
| E2F8 | CREBZF  |
| E2F8 | CREM    |
| E2F8 | CSRP1   |
| E2F8 | CTCF    |
| E2F8 | CTH     |
| E2F8 | CTNNAL1 |
| E2F8 | CWC22   |
| E2F8 | DDT     |
| E2F8 | DDX46   |
| E2F8 | DEK     |
| E2F8 | DENND4A |
| E2F8 | DHFR    |
| E2F8 | DHRS7B  |
| E2F8 | DHX15   |
| E2F8 | DIAPH3  |
| E2F8 | DICER1  |
| E2F8 | DLGAP5  |
| E2F8 | DLST    |
| E2F8 | DMC1    |
| E2F8 | DNAJC21 |
| E2F8 | DNAJC9  |
| E2F8 | DNMT1   |
| E2F8 | DOK1    |
| E2F8 | DPH2    |
| E2F8 | DRG1    |
| E2F8 | DTL     |
| E2F8 | DUT     |
| E2F8 | DYNLL2  |
| E2F8 | E2F1    |
| E2F8 | E2F2    |
| E2F8 | E2F8    |
| E2F8 | EBP     |
| E2F8 | ECE1    |
| E2F8 | EEP1    |
| E2F8 | EIF1AD  |
| E2F8 | EIF4A3  |

|      |         |
|------|---------|
| E2F8 | ELAVL1  |
| E2F8 | EN02    |
| E2F8 | EN0SF1  |
| E2F8 | ENOX2   |
| E2F8 | ESD     |
| E2F8 | EX01    |
| E2F8 | FADS3   |
| E2F8 | FAM111A |
| E2F8 | FAM111B |
| E2F8 | FAM161A |
| E2F8 | FAM185A |
| E2F8 | FAM189B |
| E2F8 | FAM192A |
| E2F8 | FAM208B |
| E2F8 | FAM76B  |
| E2F8 | FAM81A  |
| E2F8 | FAM96A  |
| E2F8 | FANCA   |
| E2F8 | FANCB   |
| E2F8 | FANCE   |
| E2F8 | FANCG   |
| E2F8 | FANCL   |
| E2F8 | FBX022  |
| E2F8 | FBX030  |
| E2F8 | FBX05   |
| E2F8 | FH      |
| E2F8 | FHIT    |
| E2F8 | FKBP5   |
| E2F8 | FL0T1   |
| E2F8 | FOXN1   |
| E2F8 | FPGS    |
| E2F8 | FSD1L   |
| E2F8 | FUS     |
| E2F8 | FUZ     |
| E2F8 | GAMT    |
| E2F8 | GAPDH   |
| E2F8 | GGH     |
| E2F8 | GINS3   |
| E2F8 | GL01    |
| E2F8 | GMPS    |
| E2F8 | GNB2    |
| E2F8 | GNB5    |
| E2F8 | GPAT2   |
| E2F8 | GRPEL2  |
| E2F8 | GSK3A   |
| E2F8 | GST01   |
| E2F8 | GTF2H2C |
| E2F8 | GTPBP1  |
| E2F8 | H2AFV   |
| E2F8 | H2AFX   |

|      |          |
|------|----------|
| E2F8 | H2AFY    |
| E2F8 | H2AFZ    |
| E2F8 | H3F3A    |
| E2F8 | HAT1     |
| E2F8 | HAUS1    |
| E2F8 | HAUS7    |
| E2F8 | HELLS    |
| E2F8 | HIST1H4C |
| E2F8 | HMGA1    |
| E2F8 | HMGB1    |
| E2F8 | HMGB2    |
| E2F8 | HMGB3    |
| E2F8 | HMGN1    |
| E2F8 | HMGN2    |
| E2F8 | HMGXB4   |
| E2F8 | HNRNPA0  |
| E2F8 | HNRNPA3  |
| E2F8 | HNRNPAB  |
| E2F8 | HNRNPF   |
| E2F8 | HNRNPH1  |
| E2F8 | HNRNPR   |
| E2F8 | HNRNPUL1 |
| E2F8 | H0XA7    |
| E2F8 | HSPA4    |
| E2F8 | HSPB11   |
| E2F8 | ICMT     |
| E2F8 | IFI16    |
| E2F8 | ING1     |
| E2F8 | INTS4    |
| E2F8 | IP09     |
| E2F8 | IRF8     |
| E2F8 | ITGB1BP1 |
| E2F8 | ITPKA    |
| E2F8 | JAK1     |
| E2F8 | JUP      |
| E2F8 | KATNAL1  |
| E2F8 | KCTD18   |
| E2F8 | KDM1A    |
| E2F8 | KEAP1    |
| E2F8 | KIF15    |
| E2F8 | KIF2A    |
| E2F8 | KIFC1    |
| E2F8 | KLF2     |
| E2F8 | KLHL14   |
| E2F8 | KLHL5    |
| E2F8 | KNTC1    |
| E2F8 | KPNB1    |
| E2F8 | LAGE3    |
| E2F8 | LAMP2    |
| E2F8 | LDB1     |

|      |           |
|------|-----------|
| E2F8 | LDHB      |
| E2F8 | LEMD3     |
| E2F8 | LIG1      |
| E2F8 | LIMA1     |
| E2F8 | LIN52     |
| E2F8 | LINC00487 |
| E2F8 | LMNB1     |
| E2F8 | LMNB2     |
| E2F8 | LNX2      |
| E2F8 | LPCAT3    |
| E2F8 | LRR1      |
| E2F8 | LRRC28    |
| E2F8 | LRRC59    |
| E2F8 | LSM4      |
| E2F8 | LUC7L2    |
| E2F8 | LYRM7     |
| E2F8 | MAD2L1    |
| E2F8 | MAP2      |
| E2F8 | MAP3K12   |
| E2F8 | MAP3K7    |
| E2F8 | MAPK8     |
| E2F8 | MAPK9     |
| E2F8 | MASTL     |
| E2F8 | MBD1      |
| E2F8 | MBD3      |
| E2F8 | MCM3      |
| E2F8 | MCM5      |
| E2F8 | MCM7      |
| E2F8 | MCM8      |
| E2F8 | MCUR1     |
| E2F8 | MDM1      |
| E2F8 | MDP1      |
| E2F8 | MED25     |
| E2F8 | MED27     |
| E2F8 | MELK      |
| E2F8 | METTTL21A |
| E2F8 | MFGE8     |
| E2F8 | MID1IP1   |
| E2F8 | MIER2     |
| E2F8 | MKI67     |
| E2F8 | MLH1      |
| E2F8 | MMS22L    |
| E2F8 | MROH1     |
| E2F8 | MRPL35    |
| E2F8 | MRPL49    |
| E2F8 | MRPL57    |
| E2F8 | MSM01     |
| E2F8 | MTERF3    |
| E2F8 | MTFR2     |
| E2F8 | MTHFD1    |

|      |         |
|------|---------|
| E2F8 | MXD3    |
| E2F8 | MYBL1   |
| E2F8 | MYBL2   |
| E2F8 | N4BP2   |
| E2F8 | NAA16   |
| E2F8 | NAB1    |
| E2F8 | NAF1    |
| E2F8 | NAIF1   |
| E2F8 | NAP1L1  |
| E2F8 | NAPEPLD |
| E2F8 | NASP    |
| E2F8 | NBN     |
| E2F8 | NCAPD3  |
| E2F8 | NCAPG   |
| E2F8 | NDUFA6  |
| E2F8 | NDUFAF6 |
| E2F8 | NECTIN1 |
| E2F8 | NFKBIL1 |
| E2F8 | NONO    |
| E2F8 | NT5DC1  |
| E2F8 | NUDT1   |
| E2F8 | NUDT21  |
| E2F8 | NUP133  |
| E2F8 | NUP155  |
| E2F8 | NUP205  |
| E2F8 | NUP43   |
| E2F8 | NUP85   |
| E2F8 | NUSAP1  |
| E2F8 | NUTF2   |
| E2F8 | NVL     |
| E2F8 | OGFRL1  |
| E2F8 | OSBPL3  |
| E2F8 | OTUD5   |
| E2F8 | OTUD6B  |
| E2F8 | PABPN1  |
| E2F8 | PAG1    |
| E2F8 | PAGR1   |
| E2F8 | PANK4   |
| E2F8 | PAQR4   |
| E2F8 | PARP2   |
| E2F8 | PARP6   |
| E2F8 | PATL1   |
| E2F8 | PAX5    |
| E2F8 | PCIF1   |
| E2F8 | PCM1    |
| E2F8 | PCMTD1  |
| E2F8 | PCNA    |
| E2F8 | PDS5B   |
| E2F8 | PET117  |
| E2F8 | PFN1    |

|      |         |
|------|---------|
| E2F8 | PGM1    |
| E2F8 | PHF14   |
| E2F8 | PHIP    |
| E2F8 | PIN1    |
| E2F8 | PJA2    |
| E2F8 | PKMYT1  |
| E2F8 | PLK4    |
| E2F8 | PMF1    |
| E2F8 | POLA1   |
| E2F8 | POLD3   |
| E2F8 | POP7    |
| E2F8 | POT1    |
| E2F8 | PPIA    |
| E2F8 | PPIG    |
| E2F8 | PPM1G   |
| E2F8 | PPP1R11 |
| E2F8 | PPP1R18 |
| E2F8 | PPP2R5D |
| E2F8 | PRAF2   |
| E2F8 | PRIM2   |
| E2F8 | PRKACB  |
| E2F8 | PRKCA   |
| E2F8 | PRKCD   |
| E2F8 | PSMA6   |
| E2F8 | PSMC3   |
| E2F8 | PSRC1   |
| E2F8 | PTBP1   |
| E2F8 | PTMA    |
| E2F8 | RAB27A  |
| E2F8 | RAB8A   |
| E2F8 | RAB8B   |
| E2F8 | RAD1    |
| E2F8 | RAD23A  |
| E2F8 | RAD51C  |
| E2F8 | RAD54L  |
| E2F8 | RAF1    |
| E2F8 | RANBP1  |
| E2F8 | RANBP3  |
| E2F8 | RASSF7  |
| E2F8 | RBBP4   |
| E2F8 | RBBP7   |
| E2F8 | RBM15   |
| E2F8 | RC3H2   |
| E2F8 | RCC2    |
| E2F8 | RCCD1   |
| E2F8 | RECQL4  |
| E2F8 | RECQL5  |
| E2F8 | REV1    |
| E2F8 | REV3L   |
| E2F8 | RFC1    |

|      |             |
|------|-------------|
| E2F8 | RFC2        |
| E2F8 | RFWD3       |
| E2F8 | RHBDD1      |
| E2F8 | RHOF        |
| E2F8 | RNASEH2A    |
| E2F8 | RNF138      |
| E2F8 | RNF34       |
| E2F8 | RPA2        |
| E2F8 | RPA3        |
| E2F8 | RPE         |
| E2F8 | RPP30       |
| E2F8 | RPS6KA5     |
| E2F8 | RREB1       |
| E2F8 | RRM2        |
| E2F8 | RSBN1       |
| E2F8 | RTKN2       |
| E2F8 | RUFY1       |
| E2F8 | RYBP        |
| E2F8 | SAC3D1      |
| E2F8 | SAE1        |
| E2F8 | SAP130      |
| E2F8 | SCARB1      |
| E2F8 | SCCPDH      |
| E2F8 | SCYL3       |
| E2F8 | SEPHS1      |
| E2F8 | SEPT11      |
| E2F8 | SERTAD2     |
| E2F8 | SET         |
| E2F8 | SETD6       |
| E2F8 | SF3A2       |
| E2F8 | SG01        |
| E2F8 | SH3GLB2     |
| E2F8 | SHMT1       |
| E2F8 | SIVA1       |
| E2F8 | SLBP        |
| E2F8 | SLC16A1-AS1 |
| E2F8 | SLC1A4      |
| E2F8 | SLC25A12    |
| E2F8 | SLC25A19    |
| E2F8 | SLC29A1     |
| E2F8 | SLC35A3     |
| E2F8 | SLC35G1     |
| E2F8 | SLC39A13    |
| E2F8 | SLC43A3     |
| E2F8 | SLC44A1     |
| E2F8 | SLC6A16     |
| E2F8 | SLC7A5      |
| E2F8 | SLF2        |
| E2F8 | SLFN13      |
| E2F8 | SMAD2       |



|      |         |
|------|---------|
| E2F8 | SMARCA4 |
| E2F8 | SMARCC2 |
| E2F8 | SMC1A   |
| E2F8 | SMC2    |
| E2F8 | SMC3    |
| E2F8 | SMC4    |
| E2F8 | SMIM13  |
| E2F8 | SNED1   |
| E2F8 | SNRNP70 |
| E2F8 | SNRPB   |
| E2F8 | SNRPG   |
| E2F8 | SNTB2   |
| E2F8 | SP3     |
| E2F8 | SPATA2L |
| E2F8 | SPC24   |
| E2F8 | SPECC1  |
| E2F8 | SPEN    |
| E2F8 | SPIN1   |
| E2F8 | SPSB3   |
| E2F8 | SQLE    |
| E2F8 | SREBF2  |
| E2F8 | SRRM1   |
| E2F8 | SRSF10  |
| E2F8 | SRSF2   |
| E2F8 | SRSF4   |
| E2F8 | SRSF7   |
| E2F8 | SSBP3   |
| E2F8 | SSRP1   |
| E2F8 | SSX2IP  |
| E2F8 | STAU2   |
| E2F8 | STK24   |
| E2F8 | STMN1   |
| E2F8 | STRBP   |
| E2F8 | STRN    |
| E2F8 | STT3B   |
| E2F8 | SUGP2   |
| E2F8 | SUM01   |
| E2F8 | SUM02   |
| E2F8 | SUZ12   |
| E2F8 | SVIP    |
| E2F8 | SYCE2   |
| E2F8 | SYNE2   |
| E2F8 | TACC3   |
| E2F8 | TAF12   |
| E2F8 | TBCA    |
| E2F8 | TCERG1  |
| E2F8 | TCF3    |
| E2F8 | TEL02   |
| E2F8 | TEX264  |
| E2F8 | TEX30   |

|      |          |
|------|----------|
| E2F8 | TFDP1    |
| E2F8 | TFPT     |
| E2F8 | TFRC     |
| E2F8 | THAP7    |
| E2F8 | TIA1     |
| E2F8 | TIMELESS |
| E2F8 | TK1      |
| E2F8 | TMEM107  |
| E2F8 | TMEM11   |
| E2F8 | TMEM161B |
| E2F8 | TMEM91   |
| E2F8 | TMUB1    |
| E2F8 | TNP01    |
| E2F8 | TOP2A    |
| E2F8 | TOPBP1   |
| E2F8 | TOPORS   |
| E2F8 | TOR2A    |
| E2F8 | TP53I13  |
| E2F8 | TPGS2    |
| E2F8 | TPI1     |
| E2F8 | TRA2B    |
| E2F8 | TRAF5    |
| E2F8 | TRIM41   |
| E2F8 | TTC39C   |
| E2F8 | TTC7A    |
| E2F8 | TTC9C    |
| E2F8 | TTN      |
| E2F8 | TUBA1B   |
| E2F8 | TUBB     |
| E2F8 | TUBGCP4  |
| E2F8 | TUBGCP5  |
| E2F8 | TWF2     |
| E2F8 | TYMS     |
| E2F8 | UBAC1    |
| E2F8 | UBE2E3   |
| E2F8 | UBE2I    |
| E2F8 | UBE2O    |
| E2F8 | UBE2V1   |
| E2F8 | UBE3A    |
| E2F8 | UBR7     |
| E2F8 | UBXN2B   |
| E2F8 | UGT8     |
| E2F8 | UHRF1    |
| E2F8 | UHRF2    |
| E2F8 | UPF3B    |
| E2F8 | UQCRC1   |
| E2F8 | URI1     |
| E2F8 | USP1     |
| E2F8 | USP28    |
| E2F8 | USP4     |

|      |          |
|------|----------|
| E2F8 | UTY      |
| E2F8 | VIPAS39  |
| E2F8 | VMA21    |
| E2F8 | VPS29    |
| E2F8 | WDR34    |
| E2F8 | WDR5     |
| E2F8 | WDR70    |
| E2F8 | WDR90    |
| E2F8 | WRAP53   |
| E2F8 | XKR6     |
| E2F8 | XP01     |
| E2F8 | XRCC5    |
| E2F8 | YEATS4   |
| E2F8 | YWHAH    |
| E2F8 | YWHAQ    |
| E2F8 | ZBTB45   |
| E2F8 | ZC3H12D  |
| E2F8 | ZCCHC17  |
| E2F8 | ZFP64    |
| E2F8 | ZFP91    |
| E2F8 | ZGRF1    |
| E2F8 | ZNF133   |
| E2F8 | ZNF200   |
| E2F8 | ZNF395   |
| E2F8 | ZNF502   |
| E2F8 | ZNF598   |
| E2F8 | ZW10     |
| E4F1 | AK4      |
| E4F1 | E4F1     |
| EGR1 | ABCA7    |
| EGR1 | ABCB4    |
| EGR1 | ABCB8    |
| EGR1 | ABHD17B  |
| EGR1 | ABR      |
| EGR1 | ABRACL   |
| EGR1 | ABT1     |
| EGR1 | ACTR6    |
| EGR1 | ADA      |
| EGR1 | AEN      |
| EGR1 | AFTPH    |
| EGR1 | AG01     |
| EGR1 | AGPAT5   |
| EGR1 | ALCAM    |
| EGR1 | ALDOC    |
| EGR1 | ANKMY1   |
| EGR1 | ANXA6    |
| EGR1 | AP3S1    |
| EGR1 | ARHGAP33 |
| EGR1 | ARHGAP44 |
| EGR1 | ARHGEF12 |

|      |          |
|------|----------|
| EGR1 | ARHGEF7  |
| EGR1 | ATG4A    |
| EGR1 | ATXN1L   |
| EGR1 | B3GALNT1 |
| EGR1 | B4GALT3  |
| EGR1 | BBIP1    |
| EGR1 | BCOR     |
| EGR1 | BIK      |
| EGR1 | BLNK     |
| EGR1 | BLVRA    |
| EGR1 | BMPR1A   |
| EGR1 | BRPF1    |
| EGR1 | BTG2     |
| EGR1 | BUB3     |
| EGR1 | C18orf21 |
| EGR1 | C1orf174 |
| EGR1 | C3orf14  |
| EGR1 | C6orf47  |
| EGR1 | CAMK1    |
| EGR1 | CAND1    |
| EGR1 | CASC4    |
| EGR1 | CCAR1    |
| EGR1 | CCDC130  |
| EGR1 | CCDC171  |
| EGR1 | CCDC82   |
| EGR1 | CCDC97   |
| EGR1 | CCL3     |
| EGR1 | CCNB1IP1 |
| EGR1 | CCNL1    |
| EGR1 | CCNL2    |
| EGR1 | CCNYL1   |
| EGR1 | CD69     |
| EGR1 | CD70     |
| EGR1 | CD72     |
| EGR1 | CD9      |
| EGR1 | CENPQ    |
| EGR1 | CERS2    |
| EGR1 | CHCHD2   |
| EGR1 | CHD4     |
| EGR1 | CHD6     |
| EGR1 | CMC2     |
| EGR1 | CNIH1    |
| EGR1 | CNOT11   |
| EGR1 | CNOT2    |
| EGR1 | COG7     |
| EGR1 | COQ9     |
| EGR1 | CPEB4    |
| EGR1 | CREBRF   |
| EGR1 | CREG1    |
| EGR1 | CTNNA1   |

|      |         |
|------|---------|
| EGR1 | CUL2    |
| EGR1 | CUTC    |
| EGR1 | CWC22   |
| EGR1 | CXCR4   |
| EGR1 | CYB5R1  |
| EGR1 | CYFIP2  |
| EGR1 | DCAF16  |
| EGR1 | DCLRE1B |
| EGR1 | DDHD1   |
| EGR1 | DDI2    |
| EGR1 | DDIT3   |
| EGR1 | DDX50   |
| EGR1 | DEF6    |
| EGR1 | DENND4B |
| EGR1 | DGKA    |
| EGR1 | DHX37   |
| EGR1 | DMWD    |
| EGR1 | DNAJC10 |
| EGR1 | DRAM2   |
| EGR1 | DUSP1   |
| EGR1 | DUSP14  |
| EGR1 | DUSP2   |
| EGR1 | DYM     |
| EGR1 | EGR1    |
| EGR1 | EGR2    |
| EGR1 | EGR3    |
| EGR1 | EHD4    |
| EGR1 | EIF2AK2 |
| EGR1 | EIF3C   |
| EGR1 | EIF4G2  |
| EGR1 | EIF5A   |
| EGR1 | ELMSAN1 |
| EGR1 | ENTPD4  |
| EGR1 | ETV5    |
| EGR1 | F2RL3   |
| EGR1 | FAM3C   |
| EGR1 | FAM98B  |
| EGR1 | FBX033  |
| EGR1 | FBXW11  |
| EGR1 | FCRL5   |
| EGR1 | FGFR1   |
| EGR1 | FGFR10P |
| EGR1 | FLCN    |
| EGR1 | FOS     |
| EGR1 | FOSB    |
| EGR1 | FUBP1   |
| EGR1 | FXR2    |
| EGR1 | GABPB1  |
| EGR1 | GCAT    |
| EGR1 | GGCX    |

|      |          |
|------|----------|
| EGR1 | GLRX     |
| EGR1 | GLYCTK   |
| EGR1 | GMFB     |
| EGR1 | GNL1     |
| EGR1 | GPCPD1   |
| EGR1 | GPBR1    |
| EGR1 | GPN1     |
| EGR1 | GRINA    |
| EGR1 | GRN      |
| EGR1 | GSS      |
| EGR1 | GSTM4    |
| EGR1 | GYPC     |
| EGR1 | HCFC2    |
| EGR1 | HDAC10   |
| EGR1 | HDAC7    |
| EGR1 | HEATR1   |
| EGR1 | HEBP2    |
| EGR1 | HERPUD2  |
| EGR1 | HES1     |
| EGR1 | HEXIM1   |
| EGR1 | HIF1AN   |
| EGR1 | HIST1H4B |
| EGR1 | HLTF     |
| EGR1 | HNRNPH1  |
| EGR1 | HYOU1    |
| EGR1 | ID2      |
| EGR1 | IDH3A    |
| EGR1 | IER2     |
| EGR1 | IER5     |
| EGR1 | IFI30    |
| EGR1 | IFI35    |
| EGR1 | IFIT2    |
| EGR1 | IFT20    |
| EGR1 | IGSF8    |
| EGR1 | IL16     |
| EGR1 | INSIG1   |
| EGR1 | INTS5    |
| EGR1 | JMJD1C   |
| EGR1 | JRKL     |
| EGR1 | JUN      |
| EGR1 | JUNB     |
| EGR1 | JUND     |
| EGR1 | KANK1    |
| EGR1 | KCNMA1   |
| EGR1 | KCTD6    |
| EGR1 | KDM4B    |
| EGR1 | KDM5B    |
| EGR1 | KIAA1841 |
| EGR1 | KIAA2026 |
| EGR1 | KIF14    |

|      |           |
|------|-----------|
| EGR1 | KIN       |
| EGR1 | KLF10     |
| EGR1 | KLHL14    |
| EGR1 | KLHL18    |
| EGR1 | KMO       |
| EGR1 | KMT2E-AS1 |
| EGR1 | KTI12     |
| EGR1 | LASP1     |
| EGR1 | LCK       |
| EGR1 | LCOR      |
| EGR1 | LETM1     |
| EGR1 | LGALS1    |
| EGR1 | LIMS1     |
| EGR1 | LIPE      |
| EGR1 | LMBRD1    |
| EGR1 | LMCD1     |
| EGR1 | LRIF1     |
| EGR1 | LRMP      |
| EGR1 | LTA       |
| EGR1 | MAP1LC3B  |
| EGR1 | MAP2K1    |
| EGR1 | MAP2K4    |
| EGR1 | MAP3K7    |
| EGR1 | MAP4      |
| EGR1 | MAPKAP1   |
| EGR1 | MAPKAPK2  |
| EGR1 | MARCH6    |
| EGR1 | MARCKSL1  |
| EGR1 | MBD3      |
| EGR1 | MCL1      |
| EGR1 | MDFIC     |
| EGR1 | MEF2C     |
| EGR1 | MEF2D     |
| EGR1 | MFGE8     |
| EGR1 | MIATNB    |
| EGR1 | MICAL1    |
| EGR1 | MICU1     |
| EGR1 | MIDN      |
| EGR1 | MIER2     |
| EGR1 | MIIP      |
| EGR1 | MIR22HG   |
| EGR1 | MIR3142HG |
| EGR1 | MOCS2     |
| EGR1 | MORC4     |
| EGR1 | MPG       |
| EGR1 | MR1       |
| EGR1 | MROH1     |
| EGR1 | MS4A1     |
| EGR1 | MS4A7     |
| EGR1 | MSL1      |

|      |          |
|------|----------|
| EGR1 | MSRA     |
| EGR1 | MTMR14   |
| EGR1 | MVD      |
| EGR1 | MYB      |
| EGR1 | MYO6     |
| EGR1 | NAA35    |
| EGR1 | NAB2     |
| EGR1 | NADK2    |
| EGR1 | NCOA5    |
| EGR1 | NDEL1    |
| EGR1 | NEIL2    |
| EGR1 | NEIL3    |
| EGR1 | NFATC1   |
| EGR1 | NFKBIA   |
| EGR1 | NFKBID   |
| EGR1 | NFYC     |
| EGR1 | NIN      |
| EGR1 | NMD3     |
| EGR1 | NMU      |
| EGR1 | NORAD    |
| EGR1 | NR4A1    |
| EGR1 | NR4A2    |
| EGR1 | NSRP1    |
| EGR1 | NTMT1    |
| EGR1 | NUBP1    |
| EGR1 | NUP93    |
| EGR1 | OAT      |
| EGR1 | OPTN     |
| EGR1 | ORAI2    |
| EGR1 | OSBPL10  |
| EGR1 | OSBPL9   |
| EGR1 | OSTF1    |
| EGR1 | OSTM1    |
| EGR1 | OTUD1    |
| EGR1 | OTUD5    |
| EGR1 | P2RY10   |
| EGR1 | PAAF1    |
| EGR1 | PAFAH1B3 |
| EGR1 | PATL1    |
| EGR1 | PCSK7    |
| EGR1 | PDCL3    |
| EGR1 | PDE9A    |
| EGR1 | PDIA5    |
| EGR1 | PEX2     |
| EGR1 | PFKL     |
| EGR1 | PGRMC2   |
| EGR1 | PHACTR1  |
| EGR1 | PHF19    |
| EGR1 | PHF6     |
| EGR1 | PHLDB3   |



|      |          |
|------|----------|
| EGR1 | PIAS1    |
| EGR1 | PIGA     |
| EGR1 | PIGS     |
| EGR1 | PIK3CA   |
| EGR1 | PITPNB   |
| EGR1 | PKIA     |
| EGR1 | PMM2     |
| EGR1 | PMPCA    |
| EGR1 | PNP      |
| EGR1 | POLG     |
| EGR1 | POLR3E   |
| EGR1 | POMGNT1  |
| EGR1 | POP1     |
| EGR1 | PPID     |
| EGR1 | PPP1R14A |
| EGR1 | PPP1R15A |
| EGR1 | PPP1R16B |
| EGR1 | PPP1R2   |
| EGR1 | PRKCD    |
| EGR1 | PRKRIP1  |
| EGR1 | PRPF39   |
| EGR1 | PRPS2    |
| EGR1 | PSMD2    |
| EGR1 | PTP4A1   |
| EGR1 | PTPN7    |
| EGR1 | PTPRC    |
| EGR1 | PTPRJ    |
| EGR1 | PYURF    |
| EGR1 | QARS     |
| EGR1 | QPCT     |
| EGR1 | RAB5B    |
| EGR1 | RABGAP1  |
| EGR1 | RANGAP1  |
| EGR1 | RASAL3   |
| EGR1 | RASGRF1  |
| EGR1 | RASL11A  |
| EGR1 | RASSF6   |
| EGR1 | RBM42    |
| EGR1 | RCAN3    |
| EGR1 | RCBTB2   |
| EGR1 | RGS13    |
| EGR1 | RGS16    |
| EGR1 | RGS20    |
| EGR1 | RHOQ     |
| EGR1 | RMDN3    |
| EGR1 | RND1     |
| EGR1 | RNF144B  |
| EGR1 | RNF20    |
| EGR1 | RNPEPL1  |
| EGR1 | RPL18A   |

|      |          |
|------|----------|
| EGR1 | RREB1    |
| EGR1 | RSRC2    |
| EGR1 | RSU1     |
| EGR1 | RUSC1    |
| EGR1 | S100A11  |
| EGR1 | SACM1L   |
| EGR1 | SARS2    |
| EGR1 | SBDS     |
| EGR1 | SCAMP1   |
| EGR1 | SCYL3    |
| EGR1 | SDCBP    |
| EGR1 | SDR39U1  |
| EGR1 | SEC23A   |
| EGR1 | SEC24D   |
| EGR1 | SERINC3  |
| EGR1 | SET      |
| EGR1 | SGK1     |
| EGR1 | SH3RF1   |
| EGR1 | SIN3A    |
| EGR1 | SLC16A1  |
| EGR1 | SLC25A17 |
| EGR1 | SLC25A28 |
| EGR1 | SLC25A39 |
| EGR1 | SLC25A4  |
| EGR1 | SLC35C2  |
| EGR1 | SLC35F5  |
| EGR1 | SLC37A1  |
| EGR1 | SLC9A3R1 |
| EGR1 | SLC04A1  |
| EGR1 | SMARCC1  |
| EGR1 | SMIM12   |
| EGR1 | SNAPIN   |
| EGR1 | SNX1     |
| EGR1 | SNX9     |
| EGR1 | SORL1    |
| EGR1 | SP1      |
| EGR1 | SP140L   |
| EGR1 | SPN      |
| EGR1 | SRGAP2   |
| EGR1 | STEAP1B  |
| EGR1 | STRN4    |
| EGR1 | STT3A    |
| EGR1 | STX6     |
| EGR1 | TACC1    |
| EGR1 | TAGAP    |
| EGR1 | TBC1D1   |
| EGR1 | TBRG1    |
| EGR1 | TCF4     |
| EGR1 | TEC      |
| EGR1 | TERF2IP  |

|      |          |
|------|----------|
| EGR1 | TFG      |
| EGR1 | THAP12   |
| EGR1 | THEM4    |
| EGR1 | TIGAR    |
| EGR1 | TIMM10B  |
| EGR1 | TINF2    |
| EGR1 | TM2D3    |
| EGR1 | TMED8    |
| EGR1 | TMEM38A  |
| EGR1 | TMEM39A  |
| EGR1 | TMEM68   |
| EGR1 | TNF      |
| EGR1 | TNP03    |
| EGR1 | TOR1AIP1 |
| EGR1 | TPGS1    |
| EGR1 | TRADD    |
| EGR1 | TRAF4    |
| EGR1 | TRIM41   |
| EGR1 | TRIM61   |
| EGR1 | TRIP11   |
| EGR1 | TRPC4AP  |
| EGR1 | TSG101   |
| EGR1 | TSP0     |
| EGR1 | TSPYL2   |
| EGR1 | TTC14    |
| EGR1 | TVP23B   |
| EGR1 | UBALD2   |
| EGR1 | UBL7-AS1 |
| EGR1 | UCHL5    |
| EGR1 | UFM1     |
| EGR1 | USP42    |
| EGR1 | USP44    |
| EGR1 | USP5     |
| EGR1 | VAV1     |
| EGR1 | VEZT     |
| EGR1 | VPS72    |
| EGR1 | WFS1     |
| EGR1 | WSB1     |
| EGR1 | WWP1     |
| EGR1 | XPC      |
| EGR1 | YAE1D1   |
| EGR1 | YIPF3    |
| EGR1 | ZBTB22   |
| EGR1 | ZFAND1   |
| EGR1 | ZFP36    |
| EGR1 | ZFP36L1  |
| EGR1 | ZFPL1    |
| EGR1 | ZFYVE16  |
| EGR1 | ZMYM2    |
| EGR1 | ZNF181   |

|      |         |
|------|---------|
| EGR1 | ZNF24   |
| EGR1 | ZNF296  |
| EGR1 | ZNF485  |
| EGR1 | ZNF608  |
| EGR1 | ZRSR2   |
| EGR1 | ZSCAN32 |
| EGR2 | ABRACL  |
| EGR2 | ALDOC   |
| EGR2 | ARRDC2  |
| EGR2 | ASNA1   |
| EGR2 | ATP13A1 |
| EGR2 | BICDL1  |
| EGR2 | BIK     |
| EGR2 | BZW1    |
| EGR2 | CCDC88A |
| EGR2 | CCND2   |
| EGR2 | CD83    |
| EGR2 | CELF2   |
| EGR2 | CERCAM  |
| EGR2 | CHD4    |
| EGR2 | CREG1   |
| EGR2 | CYFIP2  |
| EGR2 | DMWD    |
| EGR2 | DNAJC5  |
| EGR2 | DUSP10  |
| EGR2 | DUSP14  |
| EGR2 | DUSP2   |
| EGR2 | EGR1    |
| EGR2 | EGR2    |
| EGR2 | EGR3    |
| EGR2 | ETV5    |
| EGR2 | FAM3C   |
| EGR2 | FHOD1   |
| EGR2 | FLI1    |
| EGR2 | FYN     |
| EGR2 | GRINA   |
| EGR2 | GSN     |
| EGR2 | HES1    |
| EGR2 | HOMER2  |
| EGR2 | HPCAL1  |
| EGR2 | HYOU1   |
| EGR2 | IER2    |
| EGR2 | IGSF8   |
| EGR2 | ING2    |
| EGR2 | IP6K2   |
| EGR2 | IQSEC1  |
| EGR2 | JADE1   |
| EGR2 | JUNB    |
| EGR2 | KDM6B   |
| EGR2 | LGALS1  |

|      |           |
|------|-----------|
| EGR2 | LINC01003 |
| EGR2 | LITAF     |
| EGR2 | LRMP      |
| EGR2 | MAPK8     |
| EGR2 | MEA1      |
| EGR2 | MEF2C     |
| EGR2 | MICAL1    |
| EGR2 | MICU1     |
| EGR2 | MIR22HG   |
| EGR2 | MYC       |
| EGR2 | NAB2      |
| EGR2 | NAMPT     |
| EGR2 | NFATC1    |
| EGR2 | NFE2L2    |
| EGR2 | NFKBIA    |
| EGR2 | NFKBID    |
| EGR2 | NIN       |
| EGR2 | NR4A1     |
| EGR2 | NR4A2     |
| EGR2 | NR4A3     |
| EGR2 | NTMT1     |
| EGR2 | ORC4      |
| EGR2 | OTUD1     |
| EGR2 | PELI1     |
| EGR2 | PEX2      |
| EGR2 | PGRMC2    |
| EGR2 | PHACTR1   |
| EGR2 | PHF19     |
| EGR2 | PKIA      |
| EGR2 | PLK3      |
| EGR2 | PPP1CC    |
| EGR2 | PPP1R15A  |
| EGR2 | PPP1R2    |
| EGR2 | PPP2R2A   |
| EGR2 | PTGER4    |
| EGR2 | PTPN7     |
| EGR2 | RAP1A     |
| EGR2 | RASSF2    |
| EGR2 | REL       |
| EGR2 | SCPEP1    |
| EGR2 | SERTAD3   |
| EGR2 | SGK1      |
| EGR2 | SIPA1     |
| EGR2 | SLC16A3   |
| EGR2 | SLC25A39  |
| EGR2 | SLC37A1   |
| EGR2 | SP1       |
| EGR2 | SPATA2L   |
| EGR2 | STX6      |
| EGR2 | TNF       |

|      |          |
|------|----------|
| EGR2 | TNFAIP3  |
| EGR2 | TNFAIP8  |
| EGR2 | TNP03    |
| EGR2 | TP53BP1  |
| EGR2 | TRAF4    |
| EGR2 | TRIP10   |
| EGR2 | TSPAN17  |
| EGR2 | TVP23B   |
| EGR2 | UBIAD1   |
| EGR2 | VAT1     |
| EGR2 | VAV1     |
| EGR2 | WFS1     |
| EGR2 | WSB2     |
| EGR2 | WWP1     |
| EGR2 | ZBTB22   |
| EGR2 | ZC3H12A  |
| EGR2 | ZFP36    |
| EGR2 | ZFP36L1  |
| EGR2 | ZFPL1    |
| EGR3 | ABRACL   |
| EGR3 | ACACA    |
| EGR3 | ADAM17   |
| EGR3 | ADNP2    |
| EGR3 | AGPAT2   |
| EGR3 | AGPAT5   |
| EGR3 | ARHGEF2  |
| EGR3 | ATP6V0A1 |
| EGR3 | ATP6V1C1 |
| EGR3 | ATXN7L3  |
| EGR3 | BAG4     |
| EGR3 | BCL2A1   |
| EGR3 | BTG2     |
| EGR3 | C12orf57 |
| EGR3 | CAMK2B   |
| EGR3 | CBWD5    |
| EGR3 | CCDC107  |
| EGR3 | CD274    |
| EGR3 | CD83     |
| EGR3 | CEP162   |
| EGR3 | CEP170   |
| EGR3 | CLSTN1   |
| EGR3 | CNR2     |
| EGR3 | COQ7     |
| EGR3 | CREBRF   |
| EGR3 | CSF2RB   |
| EGR3 | DCP1A    |
| EGR3 | DDAH2    |
| EGR3 | DLGAP4   |
| EGR3 | DUSP10   |
| EGR3 | DUSP2    |

|      |           |
|------|-----------|
| EGR3 | EGR1      |
| EGR3 | EGR2      |
| EGR3 | EGR3      |
| EGR3 | ERF       |
| EGR3 | ETHE1     |
| EGR3 | EVI2A     |
| EGR3 | FAM3C     |
| EGR3 | FEZ2      |
| EGR3 | GRAMD1A   |
| EGR3 | HES1      |
| EGR3 | HIVEP3    |
| EGR3 | HOMER2    |
| EGR3 | HOPX      |
| EGR3 | HVCN1     |
| EGR3 | ICAM1     |
| EGR3 | IER2      |
| EGR3 | IL21R     |
| EGR3 | IL2RG     |
| EGR3 | IL6       |
| EGR3 | JARID2    |
| EGR3 | KLF10     |
| EGR3 | LDLR      |
| EGR3 | LINC01136 |
| EGR3 | LTA       |
| EGR3 | MAPK6     |
| EGR3 | MCRIP2    |
| EGR3 | MEF2C     |
| EGR3 | MFN1      |
| EGR3 | MIEF1     |
| EGR3 | MUT       |
| EGR3 | MYC       |
| EGR3 | NAB2      |
| EGR3 | NCAPG2    |
| EGR3 | NFATC1    |
| EGR3 | NFE2L2    |
| EGR3 | NFKBIA    |
| EGR3 | NFKBID    |
| EGR3 | NFKBIZ    |
| EGR3 | NIN       |
| EGR3 | NIPSNAP1  |
| EGR3 | NR3C1     |
| EGR3 | NR4A1     |
| EGR3 | NR4A2     |
| EGR3 | NRDE2     |
| EGR3 | OLA1      |
| EGR3 | OMA1      |
| EGR3 | PACIN2    |
| EGR3 | PDCD11    |
| EGR3 | PDPK1     |
| EGR3 | PHACTR1   |

|      |          |
|------|----------|
| EGR3 | PIM3     |
| EGR3 | PKMYT1   |
| EGR3 | PLK3     |
| EGR3 | PNMA1    |
| EGR3 | PNPLA8   |
| EGR3 | POGK     |
| EGR3 | PPP1R15A |
| EGR3 | PPP1R2   |
| EGR3 | PPP3CA   |
| EGR3 | PPTC7    |
| EGR3 | PRAF2    |
| EGR3 | PRDM1    |
| EGR3 | PRDX1    |
| EGR3 | PTGER4   |
| EGR3 | PTPN12   |
| EGR3 | PTPN6    |
| EGR3 | PTPRJ    |
| EGR3 | QRICH1   |
| EGR3 | RASGEF1B |
| EGR3 | RBFA     |
| EGR3 | REL      |
| EGR3 | RILPL2   |
| EGR3 | RIN3     |
| EGR3 | RUFY3    |
| EGR3 | SBDS     |
| EGR3 | SDCBP    |
| EGR3 | SEMA7A   |
| EGR3 | SIAH2    |
| EGR3 | SLC39A10 |
| EGR3 | SNX12    |
| EGR3 | SNX8     |
| EGR3 | SPATA2L  |
| EGR3 | SPG21    |
| EGR3 | SS18L1   |
| EGR3 | STK4     |
| EGR3 | STUM     |
| EGR3 | TBP      |
| EGR3 | TEX10    |
| EGR3 | TLK1     |
| EGR3 | TMC8     |
| EGR3 | TNFAIP3  |
| EGR3 | TOMM5    |
| EGR3 | TONSL    |
| EGR3 | TRAF4    |
| EGR3 | TVP23B   |
| EGR3 | USP32    |
| EGR3 | VAMP4    |
| EGR3 | YPEL1    |
| EGR3 | ZC3H12A  |
| EGR3 | ZC3H7B   |



|      |          |
|------|----------|
| EGR3 | ZFP36L1  |
| EGR3 | ZNF181   |
| EGR3 | ZNF273   |
| EGR3 | ZNF586   |
| ELF1 | A4GALT   |
| ELF1 | AAGAB    |
| ELF1 | AAMDC    |
| ELF1 | AAMP     |
| ELF1 | AAR2     |
| ELF1 | AASDH    |
| ELF1 | AASDHPPT |
| ELF1 | AATF     |
| ELF1 | ABCB7    |
| ELF1 | ABCD3    |
| ELF1 | ABCF1    |
| ELF1 | ABHD10   |
| ELF1 | ABHD13   |
| ELF1 | ABHD14B  |
| ELF1 | ABHD2    |
| ELF1 | ABHD3    |
| ELF1 | ABHD5    |
| ELF1 | ABI1     |
| ELF1 | ABI3     |
| ELF1 | ABL1     |
| ELF1 | ABRACL   |
| ELF1 | ABT1     |
| ELF1 | ABTB1    |
| ELF1 | ACAA1    |
| ELF1 | ACAA2    |
| ELF1 | ACAD9    |
| ELF1 | ACADS    |
| ELF1 | ACAP1    |
| ELF1 | ACAP2    |
| ELF1 | ACAT2    |
| ELF1 | ACBD3    |
| ELF1 | ACBD5    |
| ELF1 | ACBD6    |
| ELF1 | ACD      |
| ELF1 | ACIN1    |
| ELF1 | ACLY     |
| ELF1 | AC02     |
| ELF1 | AC0T7    |
| ELF1 | AC0T8    |
| ELF1 | ACP1     |
| ELF1 | ACSF2    |
| ELF1 | ACSL3    |
| ELF1 | ACSL5    |
| ELF1 | ACSS1    |
| ELF1 | ACTA2    |
| ELF1 | ACTB     |

|      |         |
|------|---------|
| ELF1 | ACTG1   |
| ELF1 | ACTL6A  |
| ELF1 | ACTN4   |
| ELF1 | ACTR1A  |
| ELF1 | ACTR1B  |
| ELF1 | ACTR2   |
| ELF1 | ACTR3   |
| ELF1 | ACTR6   |
| ELF1 | ACTR8   |
| ELF1 | ACY3    |
| ELF1 | ACYP1   |
| ELF1 | ACYP2   |
| ELF1 | ADAM10  |
| ELF1 | ADAM17  |
| ELF1 | ADAM19  |
| ELF1 | ADAM23  |
| ELF1 | ADAR    |
| ELF1 | ADARB1  |
| ELF1 | ADCK5   |
| ELF1 | ADD1    |
| ELF1 | ADD3    |
| ELF1 | ADGRG5  |
| ELF1 | ADH5    |
| ELF1 | ADI1    |
| ELF1 | ADIPOR1 |
| ELF1 | ADO     |
| ELF1 | ADPRHL2 |
| ELF1 | ADPRM   |
| ELF1 | ADSL    |
| ELF1 | ADSS    |
| ELF1 | AEBP2   |
| ELF1 | AES     |
| ELF1 | AFAP1L2 |
| ELF1 | AFF3    |
| ELF1 | AFF4    |
| ELF1 | AFTPH   |
| ELF1 | AGBL5   |
| ELF1 | AGFG1   |
| ELF1 | AGFG2   |
| ELF1 | AGL     |
| ELF1 | AG01    |
| ELF1 | AG02    |
| ELF1 | AGPAT2  |
| ELF1 | AGPS    |
| ELF1 | AGTPBP1 |
| ELF1 | AGTRAP  |
| ELF1 | AHCTF1  |
| ELF1 | AHCYL1  |
| ELF1 | AHI1    |
| ELF1 | AHSA1   |

|      |          |
|------|----------|
| ELF1 | AIF1     |
| ELF1 | AIFM1    |
| ELF1 | AIG1     |
| ELF1 | AIM2     |
| ELF1 | AIMP1    |
| ELF1 | AIP      |
| ELF1 | AK3      |
| ELF1 | AK6      |
| ELF1 | AKAP10   |
| ELF1 | AKAP13   |
| ELF1 | AKAP8    |
| ELF1 | AKAP8L   |
| ELF1 | AKAP9    |
| ELF1 | AKIRIN1  |
| ELF1 | AKIRIN2  |
| ELF1 | AKNA     |
| ELF1 | AKR1B1   |
| ELF1 | AKR7A2   |
| ELF1 | AKT2     |
| ELF1 | ALAD     |
| ELF1 | ALCAM    |
| ELF1 | ALDH16A1 |
| ELF1 | ALDH18A1 |
| ELF1 | ALDH2    |
| ELF1 | ALDH5A1  |
| ELF1 | ALDH7A1  |
| ELF1 | ALDH9A1  |
| ELF1 | ALG6     |
| ELF1 | ALG8     |
| ELF1 | ALKBH4   |
| ELF1 | ALKBH5   |
| ELF1 | ALKBH7   |
| ELF1 | ALOX5    |
| ELF1 | ALOX5AP  |
| ELF1 | ALPK1    |
| ELF1 | AMFR     |
| ELF1 | AMZ2     |
| ELF1 | ANAPC10  |
| ELF1 | ANAPC11  |
| ELF1 | ANAPC13  |
| ELF1 | ANAPC15  |
| ELF1 | ANAPC16  |
| ELF1 | ANAPC2   |
| ELF1 | ANAPC4   |
| ELF1 | ANAPC5   |
| ELF1 | ANGEL2   |
| ELF1 | ANKFY1   |
| ELF1 | ANKH     |
| ELF1 | ANKHD1   |
| ELF1 | ANKIB1   |

|      |          |
|------|----------|
| ELF1 | ANKLE1   |
| ELF1 | ANKLE2   |
| ELF1 | ANKMY2   |
| ELF1 | ANKRD10  |
| ELF1 | ANKRD11  |
| ELF1 | ANKRD12  |
| ELF1 | ANKRD13A |
| ELF1 | ANKRD17  |
| ELF1 | ANKRD26  |
| ELF1 | ANKRD27  |
| ELF1 | ANKRD39  |
| ELF1 | ANKRD40  |
| ELF1 | ANKRD49  |
| ELF1 | ANKRD54  |
| ELF1 | ANKRD7   |
| ELF1 | ANLN     |
| ELF1 | AN06     |
| ELF1 | ANP32A   |
| ELF1 | ANP32B   |
| ELF1 | ANP32E   |
| ELF1 | ANXA11   |
| ELF1 | ANXA2R   |
| ELF1 | ANXA5    |
| ELF1 | ANXA6    |
| ELF1 | ANXA7    |
| ELF1 | AP1B1    |
| ELF1 | AP1G2    |
| ELF1 | AP1M1    |
| ELF1 | AP1S1    |
| ELF1 | AP1S2    |
| ELF1 | AP2A1    |
| ELF1 | AP2A2    |
| ELF1 | AP2B1    |
| ELF1 | AP2M1    |
| ELF1 | AP2S1    |
| ELF1 | AP3B1    |
| ELF1 | AP3M1    |
| ELF1 | AP3S1    |
| ELF1 | AP4B1    |
| ELF1 | AP4E1    |
| ELF1 | AP5B1    |
| ELF1 | AP5M1    |
| ELF1 | APAF1    |
| ELF1 | APBB1    |
| ELF1 | APBB1IP  |
| ELF1 | APC      |
| ELF1 | APEH     |
| ELF1 | APEX2    |
| ELF1 | APH1A    |
| ELF1 | API5     |

|      |           |
|------|-----------|
| ELF1 | APIP      |
| ELF1 | APLF      |
| ELF1 | APLP2     |
| ELF1 | APOLD1    |
| ELF1 | APOPT1    |
| ELF1 | APPBP2    |
| ELF1 | APPL1     |
| ELF1 | APTX      |
| ELF1 | AQR       |
| ELF1 | ARF1      |
| ELF1 | ARF3      |
| ELF1 | ARF5      |
| ELF1 | ARF6      |
| ELF1 | ARFGAP2   |
| ELF1 | ARFGAP3   |
| ELF1 | ARFGEF1   |
| ELF1 | ARFGEF2   |
| ELF1 | ARFIP1    |
| ELF1 | ARG2      |
| ELF1 | ARGLU1    |
| ELF1 | ARHGAP10  |
| ELF1 | ARHGAP11A |
| ELF1 | ARHGAP11B |
| ELF1 | ARHGAP12  |
| ELF1 | ARHGAP17  |
| ELF1 | ARHGAP18  |
| ELF1 | ARHGAP25  |
| ELF1 | ARHGAP27  |
| ELF1 | ARHGAP30  |
| ELF1 | ARHGAP33  |
| ELF1 | ARHGAP4   |
| ELF1 | ARHGAP9   |
| ELF1 | ARHGDIA   |
| ELF1 | ARHGDIB   |
| ELF1 | ARHGEF1   |
| ELF1 | ARHGEF37  |
| ELF1 | ARHGEF39  |
| ELF1 | ARHGEF6   |
| ELF1 | ARHGEF7   |
| ELF1 | ARID1A    |
| ELF1 | ARID1B    |
| ELF1 | ARID2     |
| ELF1 | ARID4A    |
| ELF1 | ARID4B    |
| ELF1 | ARID5A    |
| ELF1 | ARID5B    |
| ELF1 | ARIH20S   |
| ELF1 | ARL13B    |
| ELF1 | ARL14EP   |
| ELF1 | ARL15     |

|      |            |
|------|------------|
| ELF1 | ARL16      |
| ELF1 | ARL17A     |
| ELF1 | ARL2BP     |
| ELF1 | ARL3       |
| ELF1 | ARL4A      |
| ELF1 | ARL4C      |
| ELF1 | ARL5A      |
| ELF1 | ARL6IP1    |
| ELF1 | ARL6IP5    |
| ELF1 | ARL6IP6    |
| ELF1 | ARL8A      |
| ELF1 | ARMC1      |
| ELF1 | ARMC6      |
| ELF1 | ARMC8      |
| ELF1 | ARMCX3     |
| ELF1 | ARMCX6     |
| ELF1 | ARMT1      |
| ELF1 | ARPC1A     |
| ELF1 | ARPC1B     |
| ELF1 | ARPC2      |
| ELF1 | ARPC3      |
| ELF1 | ARPC4      |
| ELF1 | ARPC5      |
| ELF1 | ARPC5L     |
| ELF1 | ARPP19     |
| ELF1 | ARRDC1     |
| ELF1 | ARRDC1-AS1 |
| ELF1 | ARRDC3     |
| ELF1 | ARRDC3-AS1 |
| ELF1 | ASAP1      |
| ELF1 | ASB1       |
| ELF1 | ASB13      |
| ELF1 | ASB16-AS1  |
| ELF1 | ASB2       |
| ELF1 | ASB3       |
| ELF1 | ASB6       |
| ELF1 | ASB7       |
| ELF1 | ASB8       |
| ELF1 | ASCC2      |
| ELF1 | ASF1A      |
| ELF1 | ASF1B      |
| ELF1 | ASH1L      |
| ELF1 | ASH2L      |
| ELF1 | ASL        |
| ELF1 | ASNA1      |
| ELF1 | ASNSD1     |
| ELF1 | ASPH       |
| ELF1 | ASPM       |
| ELF1 | ASPSCR1    |
| ELF1 | ASRGL1     |

|      |          |
|------|----------|
| ELF1 | ASXL1    |
| ELF1 | ASXL2    |
| ELF1 | ATAD1    |
| ELF1 | ATAD2    |
| ELF1 | ATAD5    |
| ELF1 | ATE1     |
| ELF1 | ATF1     |
| ELF1 | ATF3     |
| ELF1 | ATF4     |
| ELF1 | ATF5     |
| ELF1 | ATF6B    |
| ELF1 | ATF7     |
| ELF1 | ATF7IP   |
| ELF1 | ATF7IP2  |
| ELF1 | ATG101   |
| ELF1 | ATG12    |
| ELF1 | ATG13    |
| ELF1 | ATG16L2  |
| ELF1 | ATG3     |
| ELF1 | ATG4B    |
| ELF1 | ATG4C    |
| ELF1 | ATG4D    |
| ELF1 | ATG5     |
| ELF1 | ATM      |
| ELF1 | ATMIN    |
| ELF1 | ATP10D   |
| ELF1 | ATP11C   |
| ELF1 | ATP23    |
| ELF1 | ATP2A3   |
| ELF1 | ATP2B1   |
| ELF1 | ATP6AP1  |
| ELF1 | ATP6AP1L |
| ELF1 | ATP6AP2  |
| ELF1 | ATP6V0D1 |
| ELF1 | ATP6V0E1 |
| ELF1 | ATP6V1A  |
| ELF1 | ATP6V1B2 |
| ELF1 | ATP6V1C1 |
| ELF1 | ATP6V1D  |
| ELF1 | ATP6V1E1 |
| ELF1 | ATP6V1F  |
| ELF1 | ATP6V1G1 |
| ELF1 | ATP6V1H  |
| ELF1 | ATP8A1   |
| ELF1 | ATPAF1   |
| ELF1 | ATPAF2   |
| ELF1 | ATRAID   |
| ELF1 | ATRX     |
| ELF1 | ATXN10   |
| ELF1 | ATXN2    |

|      |          |
|------|----------|
| ELF1 | ATXN2L   |
| ELF1 | ATXN3    |
| ELF1 | ATXN7L3  |
| ELF1 | ATXN7L3B |
| ELF1 | AURKA    |
| ELF1 | AURKAIP1 |
| ELF1 | AURKB    |
| ELF1 | AVIL     |
| ELF1 | AVL9     |
| ELF1 | AZI2     |
| ELF1 | AZIN1    |
| ELF1 | B2M      |
| ELF1 | B3GALNT1 |
| ELF1 | B3GLCT   |
| ELF1 | B3GNT2   |
| ELF1 | B9D2     |
| ELF1 | BABAM1   |
| ELF1 | BACE2    |
| ELF1 | BACH2    |
| ELF1 | BAG1     |
| ELF1 | BAG5     |
| ELF1 | BAG6     |
| ELF1 | BATAP2L1 |
| ELF1 | BANF1    |
| ELF1 | BANP     |
| ELF1 | BAP1     |
| ELF1 | BARD1    |
| ELF1 | BASP1    |
| ELF1 | BAX      |
| ELF1 | BAZ1A    |
| ELF1 | BAZ1B    |
| ELF1 | BAZ2A    |
| ELF1 | BAZ2B    |
| ELF1 | BBIP1    |
| ELF1 | BBX      |
| ELF1 | BCAR3    |
| ELF1 | BCAS2    |
| ELF1 | BCAS4    |
| ELF1 | BCAT2    |
| ELF1 | BCDIN3D  |
| ELF1 | BCKDHB   |
| ELF1 | BCL10    |
| ELF1 | BCL11A   |
| ELF1 | BCL2L12  |
| ELF1 | BCL2L13  |
| ELF1 | BCL6     |
| ELF1 | BCL7A    |
| ELF1 | BCL7B    |
| ELF1 | BCL7C    |
| ELF1 | BCLAF1   |



|      |              |
|------|--------------|
| ELF1 | BCOR         |
| ELF1 | BDH2         |
| ELF1 | BDP1         |
| ELF1 | BECN1        |
| ELF1 | BET1         |
| ELF1 | BEX2         |
| ELF1 | BEX4         |
| ELF1 | BFAR         |
| ELF1 | BHLHE41      |
| ELF1 | BICD1        |
| ELF1 | BICD2        |
| ELF1 | BID          |
| ELF1 | BIK          |
| ELF1 | BIN1         |
| ELF1 | BIN3         |
| ELF1 | BIRC2        |
| ELF1 | BIRC3        |
| ELF1 | BIRC6        |
| ELF1 | BISPR        |
| ELF1 | BLCAP        |
| ELF1 | BLK          |
| ELF1 | BLOC1S1      |
| ELF1 | BLOC1S2      |
| ELF1 | BLOC1S4      |
| ELF1 | BLOC1S5      |
| ELF1 | BLOC1S6      |
| ELF1 | BLZF1        |
| ELF1 | BMP2K        |
| ELF1 | BNIP2        |
| ELF1 | BNIP3L       |
| ELF1 | BOD1L1       |
| ELF1 | BOLA1        |
| ELF1 | BOLA2-SMG1P6 |
| ELF1 | BORA         |
| ELF1 | BORCS7       |
| ELF1 | BORCS8       |
| ELF1 | BORCS8-MEF2B |
| ELF1 | BPNT1        |
| ELF1 | BPTF         |
| ELF1 | BRAT1        |
| ELF1 | BRCA1        |
| ELF1 | BRCA2        |
| ELF1 | BRCC3        |
| ELF1 | BRD2         |
| ELF1 | BRD4         |
| ELF1 | BRD7         |
| ELF1 | BRD8         |
| ELF1 | BRD9         |
| ELF1 | BRI3         |
| ELF1 | BRI3BP       |

|      |           |
|------|-----------|
| ELF1 | BRK1      |
| ELF1 | BRMS1     |
| ELF1 | BRMS1L    |
| ELF1 | BROX      |
| ELF1 | BRWD1     |
| ELF1 | BSDC1     |
| ELF1 | BTBD10    |
| ELF1 | BTBD6     |
| ELF1 | BTBD7     |
| ELF1 | BTF3      |
| ELF1 | BTF3L4    |
| ELF1 | BTG1      |
| ELF1 | BTG2      |
| ELF1 | BTG3      |
| ELF1 | BTK       |
| ELF1 | BTNL9     |
| ELF1 | BTRC      |
| ELF1 | BUB1      |
| ELF1 | BUB1B     |
| ELF1 | BUB3      |
| ELF1 | BUD31     |
| ELF1 | BZW1      |
| ELF1 | C11orf49  |
| ELF1 | C11orf58  |
| ELF1 | C12orf10  |
| ELF1 | C12orf4   |
| ELF1 | C12orf49  |
| ELF1 | C12orf57  |
| ELF1 | C12orf65  |
| ELF1 | C12orf75  |
| ELF1 | C14orf119 |
| ELF1 | C14orf93  |
| ELF1 | C15orf40  |
| ELF1 | C16orf54  |
| ELF1 | C16orf72  |
| ELF1 | C16orf87  |
| ELF1 | C16orf91  |
| ELF1 | C16orf95  |
| ELF1 | C17orf58  |
| ELF1 | C17orf75  |
| ELF1 | C18orf21  |
| ELF1 | C18orf25  |
| ELF1 | C19orf12  |
| ELF1 | C19orf25  |
| ELF1 | C19orf47  |
| ELF1 | C19orf48  |
| ELF1 | C19orf53  |
| ELF1 | C1D       |
| ELF1 | C1GALT1   |
| ELF1 | C1orf109  |

|      |          |
|------|----------|
| ELF1 | C1orf123 |
| ELF1 | C1orf131 |
| ELF1 | C1orf35  |
| ELF1 | C1orf43  |
| ELF1 | C1orf52  |
| ELF1 | C1orf74  |
| ELF1 | C21orf91 |
| ELF1 | C2CD5    |
| ELF1 | C2orf49  |
| ELF1 | C2orf68  |
| ELF1 | C2orf69  |
| ELF1 | C2orf74  |
| ELF1 | C2orf76  |
| ELF1 | C2orf88  |
| ELF1 | C3orf14  |
| ELF1 | C3orf38  |
| ELF1 | C3orf67  |
| ELF1 | C4orf3   |
| ELF1 | C4orf33  |
| ELF1 | C4orf46  |
| ELF1 | C5orf15  |
| ELF1 | C5orf24  |
| ELF1 | C5orf34  |
| ELF1 | C5orf51  |
| ELF1 | C5orf63  |
| ELF1 | C6orf203 |
| ELF1 | C6orf226 |
| ELF1 | C6orf47  |
| ELF1 | C6orf48  |
| ELF1 | C6orf52  |
| ELF1 | C6orf62  |
| ELF1 | C6orf89  |
| ELF1 | C6orf99  |
| ELF1 | C7orf26  |
| ELF1 | C7orf43  |
| ELF1 | C7orf50  |
| ELF1 | C8orf44  |
| ELF1 | C8orf76  |
| ELF1 | C8orf82  |
| ELF1 | C9orf16  |
| ELF1 | C9orf40  |
| ELF1 | C9orf72  |
| ELF1 | C9orf78  |
| ELF1 | C9orf85  |
| ELF1 | CAB39    |
| ELF1 | CAB39L   |
| ELF1 | CACUL1   |
| ELF1 | CACYBP   |
| ELF1 | CADPS    |
| ELF1 | CALCO2   |

|      |          |
|------|----------|
| ELF1 | CALM1    |
| ELF1 | CALM2    |
| ELF1 | CALM3    |
| ELF1 | CAMK1    |
| ELF1 | CAMK2D   |
| ELF1 | CAMK2G   |
| ELF1 | CAMKK2   |
| ELF1 | CAMLG    |
| ELF1 | CAMTA1   |
| ELF1 | CAND1    |
| ELF1 | CAP1     |
| ELF1 | CAPN1    |
| ELF1 | CAPN7    |
| ELF1 | CAPNS1   |
| ELF1 | CAPRIN1  |
| ELF1 | CAPZA1   |
| ELF1 | CAPZA2   |
| ELF1 | CAPZB    |
| ELF1 | CARD11   |
| ELF1 | CARD8    |
| ELF1 | CARHSP1  |
| ELF1 | CARMIL2  |
| ELF1 | CARS     |
| ELF1 | CASC3    |
| ELF1 | CASC4    |
| ELF1 | CASD1    |
| ELF1 | CASP2    |
| ELF1 | CASP3    |
| ELF1 | CASP4    |
| ELF1 | CASP8AP2 |
| ELF1 | CASP9    |
| ELF1 | CAST     |
| ELF1 | CAT      |
| ELF1 | CBFB     |
| ELF1 | CBL      |
| ELF1 | CBLL1    |
| ELF1 | CBR4     |
| ELF1 | CBWD1    |
| ELF1 | CBWD2    |
| ELF1 | CBWD3    |
| ELF1 | CBWD5    |
| ELF1 | CBX1     |
| ELF1 | CBX3     |
| ELF1 | CBX4     |
| ELF1 | CBX5     |
| ELF1 | CBX8     |
| ELF1 | CC2D1A   |
| ELF1 | CCAR1    |
| ELF1 | CCAR2    |
| ELF1 | CCDC102A |

|      |          |
|------|----------|
| ELF1 | CCDC106  |
| ELF1 | CCDC115  |
| ELF1 | CCDC117  |
| ELF1 | CCDC12   |
| ELF1 | CCDC122  |
| ELF1 | CCDC126  |
| ELF1 | CCDC127  |
| ELF1 | CCDC130  |
| ELF1 | CCDC137  |
| ELF1 | CCDC14   |
| ELF1 | CCDC141  |
| ELF1 | CCDC152  |
| ELF1 | CCDC171  |
| ELF1 | CCDC174  |
| ELF1 | CCDC189  |
| ELF1 | CCDC191  |
| ELF1 | CCDC22   |
| ELF1 | CCDC25   |
| ELF1 | CCDC34   |
| ELF1 | CCDC43   |
| ELF1 | CCDC51   |
| ELF1 | CCDC6    |
| ELF1 | CCDC61   |
| ELF1 | CCDC66   |
| ELF1 | CCDC69   |
| ELF1 | CCDC7    |
| ELF1 | CCDC71   |
| ELF1 | CCDC77   |
| ELF1 | CCDC82   |
| ELF1 | CCDC84   |
| ELF1 | CCDC88A  |
| ELF1 | CCDC88C  |
| ELF1 | CCDC90B  |
| ELF1 | CCDC91   |
| ELF1 | CCDC92   |
| ELF1 | CCDC93   |
| ELF1 | CCDC97   |
| ELF1 | CCHCR1   |
| ELF1 | CCL28    |
| ELF1 | CCM2     |
| ELF1 | CCNA2    |
| ELF1 | CCNB1    |
| ELF1 | CCNB1IP1 |
| ELF1 | CCNB2    |
| ELF1 | CCNC     |
| ELF1 | CCND3    |
| ELF1 | CCNDBP1  |
| ELF1 | CCNE2    |
| ELF1 | CCNF     |
| ELF1 | CCNG1    |

|      |          |
|------|----------|
| ELF1 | CCNG2    |
| ELF1 | CCNH     |
| ELF1 | CCNI     |
| ELF1 | CCNL1    |
| ELF1 | CCNL2    |
| ELF1 | CCNT1    |
| ELF1 | CCP110   |
| ELF1 | CCS      |
| ELF1 | CCSAP    |
| ELF1 | CCSER2   |
| ELF1 | CCT4     |
| ELF1 | CCT8     |
| ELF1 | CCZ1     |
| ELF1 | CCZ1B    |
| ELF1 | CD164    |
| ELF1 | CD180    |
| ELF1 | CD19     |
| ELF1 | CD22     |
| ELF1 | CD27     |
| ELF1 | CD2AP    |
| ELF1 | CD2BP2   |
| ELF1 | CD37     |
| ELF1 | CD40     |
| ELF1 | CD47     |
| ELF1 | CD53     |
| ELF1 | CD59     |
| ELF1 | CD72     |
| ELF1 | CD79B    |
| ELF1 | CD80     |
| ELF1 | CD81     |
| ELF1 | CD84     |
| ELF1 | CDC123   |
| ELF1 | CDC16    |
| ELF1 | CDC20    |
| ELF1 | CDC23    |
| ELF1 | CDC25B   |
| ELF1 | CDC25C   |
| ELF1 | CDC26    |
| ELF1 | CDC27    |
| ELF1 | CDC34    |
| ELF1 | CDC37L1  |
| ELF1 | CDC40    |
| ELF1 | CDC42    |
| ELF1 | CDC42EP3 |
| ELF1 | CDC42SE1 |
| ELF1 | CDC42SE2 |
| ELF1 | CDC45    |
| ELF1 | CDC5L    |
| ELF1 | CDC6     |
| ELF1 | CDC7     |

|      |          |
|------|----------|
| ELF1 | CDC73    |
| ELF1 | CDCA2    |
| ELF1 | CDCA3    |
| ELF1 | CDCA5    |
| ELF1 | CDCA7    |
| ELF1 | CDCA7L   |
| ELF1 | CDCA8    |
| ELF1 | CDIPT    |
| ELF1 | CDK1     |
| ELF1 | CDK10    |
| ELF1 | CDK11A   |
| ELF1 | CDK11B   |
| ELF1 | CDK13    |
| ELF1 | CDK19    |
| ELF1 | CDK2     |
| ELF1 | CDK2AP2  |
| ELF1 | CDK5R1   |
| ELF1 | CDK5RAP1 |
| ELF1 | CDK5RAP2 |
| ELF1 | CDK5RAP3 |
| ELF1 | CDK9     |
| ELF1 | CDKAL1   |
| ELF1 | CDKN2A   |
| ELF1 | CDKN2AIP |
| ELF1 | CDKN2C   |
| ELF1 | CDKN2D   |
| ELF1 | CDKN3    |
| ELF1 | CDS2     |
| ELF1 | CDT1     |
| ELF1 | CDV3     |
| ELF1 | CEBPG    |
| ELF1 | CEBPZ    |
| ELF1 | CEBPZOS  |
| ELF1 | CELF1    |
| ELF1 | CENPA    |
| ELF1 | CENPC    |
| ELF1 | CENPE    |
| ELF1 | CENPF    |
| ELF1 | CENPH    |
| ELF1 | CENPI    |
| ELF1 | CENPJ    |
| ELF1 | CENPK    |
| ELF1 | CENPL    |
| ELF1 | CENPM    |
| ELF1 | CENPN    |
| ELF1 | CENPO    |
| ELF1 | CENPP    |
| ELF1 | CENPQ    |
| ELF1 | CENPT    |
| ELF1 | CENPU    |

|      |         |
|------|---------|
| ELF1 | CEP104  |
| ELF1 | CEP120  |
| ELF1 | CEP128  |
| ELF1 | CEP135  |
| ELF1 | CEP152  |
| ELF1 | CEP295  |
| ELF1 | CEP350  |
| ELF1 | CEP41   |
| ELF1 | CEP44   |
| ELF1 | CEP55   |
| ELF1 | CEP57   |
| ELF1 | CEP63   |
| ELF1 | CEP85L  |
| ELF1 | CEP89   |
| ELF1 | CEP95   |
| ELF1 | CEP97   |
| ELF1 | CEPT1   |
| ELF1 | CERK    |
| ELF1 | CERS2   |
| ELF1 | CERS5   |
| ELF1 | CETN2   |
| ELF1 | CETN3   |
| ELF1 | CFAP20  |
| ELF1 | CFAP73  |
| ELF1 | CFAP97  |
| ELF1 | CFDP1   |
| ELF1 | CFL1    |
| ELF1 | CGGBP1  |
| ELF1 | CHAC2   |
| ELF1 | CHAF1A  |
| ELF1 | CHAMP1  |
| ELF1 | CHCHD1  |
| ELF1 | CHCHD10 |
| ELF1 | CHCHD2  |
| ELF1 | CHCHD5  |
| ELF1 | CHCHD7  |
| ELF1 | CHD1    |
| ELF1 | CHD1L   |
| ELF1 | CHD3    |
| ELF1 | CHD4    |
| ELF1 | CHD6    |
| ELF1 | CHD7    |
| ELF1 | CHD8    |
| ELF1 | CHD9    |
| ELF1 | CHEK1   |
| ELF1 | CHEK2   |
| ELF1 | CHERP   |
| ELF1 | CHFR    |
| ELF1 | CHI3L2  |
| ELF1 | CHIC2   |



|      |         |
|------|---------|
| ELF1 | CHKB    |
| ELF1 | CHMP1A  |
| ELF1 | CHMP1B  |
| ELF1 | CHMP2A  |
| ELF1 | CHMP2B  |
| ELF1 | CHMP3   |
| ELF1 | CHMP4B  |
| ELF1 | CHMP5   |
| ELF1 | CHMP7   |
| ELF1 | CHORDC1 |
| ELF1 | CHP1    |
| ELF1 | CHTF18  |
| ELF1 | CHTF8   |
| ELF1 | CHTOP   |
| ELF1 | CHURC1  |
| ELF1 | CIA01   |
| ELF1 | CIAPIN1 |
| ELF1 | CIB1    |
| ELF1 | CIB2    |
| ELF1 | CIC     |
| ELF1 | CIITA   |
| ELF1 | CIR1    |
| ELF1 | CIRBP   |
| ELF1 | CIT     |
| ELF1 | CITED2  |
| ELF1 | CITED4  |
| ELF1 | CKAP2   |
| ELF1 | CKAP2L  |
| ELF1 | CKAP5   |
| ELF1 | CKLF    |
| ELF1 | CKS1B   |
| ELF1 | CKS2    |
| ELF1 | CLASRP  |
| ELF1 | CLEC11A |
| ELF1 | CLHC1   |
| ELF1 | CLIC1   |
| ELF1 | CLIC4   |
| ELF1 | CLINT1  |
| ELF1 | CLIP1   |
| ELF1 | CLIP2   |
| ELF1 | CLK1    |
| ELF1 | CLK2    |
| ELF1 | CLK3    |
| ELF1 | CLK4    |
| ELF1 | CLN5    |
| ELF1 | CLNS1A  |
| ELF1 | CLP1    |
| ELF1 | CLPP    |
| ELF1 | CLPX    |
| ELF1 | CLSPN   |

|      |          |
|------|----------|
| ELF1 | CLSTN3   |
| ELF1 | CLTA     |
| ELF1 | CLTB     |
| ELF1 | CLTC     |
| ELF1 | CMAS     |
| ELF1 | CMC1     |
| ELF1 | CMC2     |
| ELF1 | CMPK1    |
| ELF1 | CMTM6    |
| ELF1 | CMTM7    |
| ELF1 | CMTR2    |
| ELF1 | CNDP2    |
| ELF1 | CNIH1    |
| ELF1 | CNIH4    |
| ELF1 | CNN2     |
| ELF1 | CNNM3    |
| ELF1 | CNOT1    |
| ELF1 | CNOT10   |
| ELF1 | CNOT2    |
| ELF1 | CNOT4    |
| ELF1 | CNOT6L   |
| ELF1 | CNOT7    |
| ELF1 | CNOT8    |
| ELF1 | CNOT9    |
| ELF1 | CNP      |
| ELF1 | CNPY3    |
| ELF1 | CNPY4    |
| ELF1 | CNR1     |
| ELF1 | CNST     |
| ELF1 | COA1     |
| ELF1 | COA3     |
| ELF1 | COA5     |
| ELF1 | COASY    |
| ELF1 | COBLL1   |
| ELF1 | COCH     |
| ELF1 | COG2     |
| ELF1 | COG4     |
| ELF1 | COG5     |
| ELF1 | COG6     |
| ELF1 | COG7     |
| ELF1 | COIL     |
| ELF1 | COL4A3BP |
| ELF1 | COMMD1   |
| ELF1 | COMMD10  |
| ELF1 | COMMD2   |
| ELF1 | COMMD3   |
| ELF1 | COMMD4   |
| ELF1 | COMMD5   |
| ELF1 | COMMD6   |
| ELF1 | COMMD7   |

|      |         |
|------|---------|
| ELF1 | COMMD8  |
| ELF1 | COMMD9  |
| ELF1 | COMTD1  |
| ELF1 | COPB1   |
| ELF1 | COPB2   |
| ELF1 | COPE    |
| ELF1 | COPG2   |
| ELF1 | COPS2   |
| ELF1 | COPS3   |
| ELF1 | COPS4   |
| ELF1 | COPS5   |
| ELF1 | COPS6   |
| ELF1 | COPS7A  |
| ELF1 | COPS9   |
| ELF1 | COPZ1   |
| ELF1 | COQ10A  |
| ELF1 | COQ10B  |
| ELF1 | COQ2    |
| ELF1 | COQ4    |
| ELF1 | COQ5    |
| ELF1 | COQ7    |
| ELF1 | COQ9    |
| ELF1 | COR01A  |
| ELF1 | COR01B  |
| ELF1 | COR07   |
| ELF1 | COTL1   |
| ELF1 | COX11   |
| ELF1 | COX14   |
| ELF1 | COX15   |
| ELF1 | COX17   |
| ELF1 | COX19   |
| ELF1 | COX4I1  |
| ELF1 | COX5A   |
| ELF1 | COX5B   |
| ELF1 | COX6A1  |
| ELF1 | COX6B1  |
| ELF1 | COX6C   |
| ELF1 | COX7A2  |
| ELF1 | COX7A2L |
| ELF1 | COX7B   |
| ELF1 | COX7C   |
| ELF1 | COX8A   |
| ELF1 | CPM     |
| ELF1 | CPNE1   |
| ELF1 | CPNE5   |
| ELF1 | CP0X    |
| ELF1 | CPPED1  |
| ELF1 | CPSF1   |
| ELF1 | CPSF2   |
| ELF1 | CPSF3   |

|      |            |
|------|------------|
| ELF1 | CPSF4      |
| ELF1 | CPSF6      |
| ELF1 | CPSF7      |
| ELF1 | CPT2       |
| ELF1 | CPTP       |
| ELF1 | CR1        |
| ELF1 | CR2        |
| ELF1 | CRADD      |
| ELF1 | CRBN       |
| ELF1 | CREB1      |
| ELF1 | CREB3L4    |
| ELF1 | CREB5      |
| ELF1 | CREBBP     |
| ELF1 | CREBZF     |
| ELF1 | CREM       |
| ELF1 | CRIP1      |
| ELF1 | CRK        |
| ELF1 | CRKL       |
| ELF1 | CRLF3      |
| ELF1 | CRNDE      |
| ELF1 | CRNKL1     |
| ELF1 | CRYZL1     |
| ELF1 | CS         |
| ELF1 | CSDE1      |
| ELF1 | CSE1L      |
| ELF1 | CSGALNACT2 |
| ELF1 | CSK        |
| ELF1 | CSNK1A1    |
| ELF1 | CSNK1D     |
| ELF1 | CSNK1G2    |
| ELF1 | CSNK1G3    |
| ELF1 | CSNK2A1    |
| ELF1 | CSNK2B     |
| ELF1 | CSPP1      |
| ELF1 | CSTF1      |
| ELF1 | CSTF2      |
| ELF1 | CSTF3      |
| ELF1 | CTBP1      |
| ELF1 | CTCF       |
| ELF1 | CTDNBP1    |
| ELF1 | CTDP1      |
| ELF1 | CTDSP1     |
| ELF1 | CTDSP2     |
| ELF1 | CTDSPL2    |
| ELF1 | CTNNA1     |
| ELF1 | CTNNB1     |
| ELF1 | CTNNBIP1   |
| ELF1 | CTNNBL1    |
| ELF1 | CTPS2      |
| ELF1 | CTR9       |

|      |          |
|------|----------|
| ELF1 | CTSH     |
| ELF1 | CTSS     |
| ELF1 | CTSZ     |
| ELF1 | CTTN     |
| ELF1 | CUEDC2   |
| ELF1 | CUL1     |
| ELF1 | CUL3     |
| ELF1 | CUL4A    |
| ELF1 | CUL4B    |
| ELF1 | CUTA     |
| ELF1 | CUTC     |
| ELF1 | CUX1     |
| ELF1 | CWC15    |
| ELF1 | CWC22    |
| ELF1 | CWC25    |
| ELF1 | CWC27    |
| ELF1 | CWF19L1  |
| ELF1 | CWF19L2  |
| ELF1 | CXCR4    |
| ELF1 | CXCR5    |
| ELF1 | CXorf21  |
| ELF1 | CXorf38  |
| ELF1 | CXXC1    |
| ELF1 | CYB561A3 |
| ELF1 | CYB561D2 |
| ELF1 | CYB5B    |
| ELF1 | CYB5D2   |
| ELF1 | CYB5R3   |
| ELF1 | CYB5R4   |
| ELF1 | CYBB     |
| ELF1 | CYC1     |
| ELF1 | CYFIP2   |
| ELF1 | CYP2R1   |
| ELF1 | CYSTM1   |
| ELF1 | CYTH2    |
| ELF1 | CYTIP    |
| ELF1 | DAAM1    |
| ELF1 | DALRD3   |
| ELF1 | DAP      |
| ELF1 | DAP3     |
| ELF1 | DAPP1    |
| ELF1 | DARS     |
| ELF1 | DAXX     |
| ELF1 | DAZAP1   |
| ELF1 | DAZAP2   |
| ELF1 | DBF4     |
| ELF1 | DBI      |
| ELF1 | DBNL     |
| ELF1 | DBR1     |
| ELF1 | DCAF10   |

|      |         |
|------|---------|
| ELF1 | DCAF11  |
| ELF1 | DCAF12  |
| ELF1 | DCAF15  |
| ELF1 | DCAF5   |
| ELF1 | DCAF6   |
| ELF1 | DCAF7   |
| ELF1 | DCAF8   |
| ELF1 | DCK     |
| ELF1 | DCLRE1B |
| ELF1 | DCLRE1C |
| ELF1 | DCP1A   |
| ELF1 | DCP2    |
| ELF1 | DCPS    |
| ELF1 | DCTN1   |
| ELF1 | DCTN2   |
| ELF1 | DCTN3   |
| ELF1 | DCTN5   |
| ELF1 | DCUN1D1 |
| ELF1 | DDA1    |
| ELF1 | DDB1    |
| ELF1 | DDHD1   |
| ELF1 | DDI2    |
| ELF1 | DDIT3   |
| ELF1 | DDR GK1 |
| ELF1 | DDT     |
| ELF1 | DDX1    |
| ELF1 | DDX17   |
| ELF1 | DDX19B  |
| ELF1 | DDX23   |
| ELF1 | DDX24   |
| ELF1 | DDX27   |
| ELF1 | DDX39A  |
| ELF1 | DDX39B  |
| ELF1 | DDX3X   |
| ELF1 | DDX3Y   |
| ELF1 | DDX42   |
| ELF1 | DDX46   |
| ELF1 | DDX47   |
| ELF1 | DDX5    |
| ELF1 | DDX50   |
| ELF1 | DDX52   |
| ELF1 | DDX58   |
| ELF1 | DDX59   |
| ELF1 | DDX6    |
| ELF1 | DECR1   |
| ELF1 | DEDD2   |
| ELF1 | DEF6    |
| ELF1 | DEF8    |
| ELF1 | DEGS1   |
| ELF1 | DEK     |

|      |         |
|------|---------|
| ELF1 | DENND1B |
| ELF1 | DENND1C |
| ELF1 | DENND2D |
| ELF1 | DENND3  |
| ELF1 | DENND4A |
| ELF1 | DENND5B |
| ELF1 | DENND6A |
| ELF1 | DENR    |
| ELF1 | DEPDC1  |
| ELF1 | DEPDC1B |
| ELF1 | DEPDC5  |
| ELF1 | DERA    |
| ELF1 | DESI2   |
| ELF1 | DET1    |
| ELF1 | DFFA    |
| ELF1 | DGKA    |
| ELF1 | DGKD    |
| ELF1 | DGKZ    |
| ELF1 | DGU0K   |
| ELF1 | DHCR24  |
| ELF1 | DHFR    |
| ELF1 | DHPS    |
| ELF1 | DHRS1   |
| ELF1 | DHRS11  |
| ELF1 | DHRS7B  |
| ELF1 | DHTKD1  |
| ELF1 | DHX15   |
| ELF1 | DHX16   |
| ELF1 | DHX30   |
| ELF1 | DHX34   |
| ELF1 | DHX36   |
| ELF1 | DHX38   |
| ELF1 | DHX40   |
| ELF1 | DHX8    |
| ELF1 | DHX9    |
| ELF1 | DIAPH1  |
| ELF1 | DIAPH2  |
| ELF1 | DIAPH3  |
| ELF1 | DICER1  |
| ELF1 | DID01   |
| ELF1 | DIP2A   |
| ELF1 | DIS3    |
| ELF1 | DIS3L   |
| ELF1 | DIS3L2  |
| ELF1 | DLD     |
| ELF1 | DLEU2   |
| ELF1 | DLG1    |
| ELF1 | DLGAP5  |
| ELF1 | DLL3    |
| ELF1 | DLST    |

|      |          |
|------|----------|
| ELF1 | DMAP1    |
| ELF1 | DMC1     |
| ELF1 | DMD      |
| ELF1 | DMTF1    |
| ELF1 | DMXL1    |
| ELF1 | DNAJA1   |
| ELF1 | DNAJA2   |
| ELF1 | DNAJB1   |
| ELF1 | DNAJB12  |
| ELF1 | DNAJB14  |
| ELF1 | DNAJB2   |
| ELF1 | DNAJB6   |
| ELF1 | DNAJC10  |
| ELF1 | DNAJC11  |
| ELF1 | DNAJC17  |
| ELF1 | DNAJC21  |
| ELF1 | DNAJC28  |
| ELF1 | DNAJC5   |
| ELF1 | DNAJC7   |
| ELF1 | DNAJC8   |
| ELF1 | DNAJC9   |
| ELF1 | DNASE1   |
| ELF1 | DNASE1L1 |
| ELF1 | DNASE2   |
| ELF1 | DNER     |
| ELF1 | DNM1L    |
| ELF1 | DNM2     |
| ELF1 | DNMBP    |
| ELF1 | DNMT1    |
| ELF1 | DNTTIP1  |
| ELF1 | DNTTIP2  |
| ELF1 | DOCK10   |
| ELF1 | DOCK2    |
| ELF1 | DOCK8    |
| ELF1 | DOCK9    |
| ELF1 | DOK1     |
| ELF1 | DOK2     |
| ELF1 | DONSON   |
| ELF1 | DPAGT1   |
| ELF1 | DPF2     |
| ELF1 | DPH3     |
| ELF1 | DPH7     |
| ELF1 | DPM1     |
| ELF1 | DPP3     |
| ELF1 | DPP8     |
| ELF1 | DPY30    |
| ELF1 | DPYSL2   |
| ELF1 | DR1      |
| ELF1 | DRAM2    |
| ELF1 | DRAP1    |



|      |           |
|------|-----------|
| ELF1 | DRG1      |
| ELF1 | DRG2      |
| ELF1 | DSCC1     |
| ELF1 | DSN1      |
| ELF1 | DTD1      |
| ELF1 | DTL       |
| ELF1 | DTNBP1    |
| ELF1 | DTX2      |
| ELF1 | DTYMK     |
| ELF1 | DUSP1     |
| ELF1 | DUSP10    |
| ELF1 | DUSP12    |
| ELF1 | DUSP14    |
| ELF1 | DUSP23    |
| ELF1 | DUSP6     |
| ELF1 | DUT       |
| ELF1 | DVL2      |
| ELF1 | DVL3      |
| ELF1 | DYM       |
| ELF1 | DYNC1H1   |
| ELF1 | DYNC1I2   |
| ELF1 | DYNC1LI1  |
| ELF1 | DYNLL1    |
| ELF1 | DYNLL2    |
| ELF1 | DYNLRB1   |
| ELF1 | DYNLT1    |
| ELF1 | DYNLT3    |
| ELF1 | DYRK1A    |
| ELF1 | DYRK2     |
| ELF1 | DZIP3     |
| ELF1 | E2F1      |
| ELF1 | E2F3      |
| ELF1 | E2F4      |
| ELF1 | E2F5      |
| ELF1 | E2F7      |
| ELF1 | EAF2      |
| ELF1 | EAPP      |
| ELF1 | EBAG9     |
| ELF1 | EBF1      |
| ELF1 | EBP       |
| ELF1 | ECD       |
| ELF1 | ECH1      |
| ELF1 | ECHDC1    |
| ELF1 | ECHDC2    |
| ELF1 | ECT2      |
| ELF1 | EDF1      |
| ELF1 | EDRF1     |
| ELF1 | EED       |
| ELF1 | EEF1A1    |
| ELF1 | EEF1AKMT1 |

|      |         |
|------|---------|
| ELF1 | EEF1D   |
| ELF1 | EEF1G   |
| ELF1 | EEF2    |
| ELF1 | EEFSEC  |
| ELF1 | EEPD1   |
| ELF1 | EFCAB11 |
| ELF1 | EFCAB14 |
| ELF1 | EFHD2   |
| ELF1 | EFR3A   |
| ELF1 | EFTUD2  |
| ELF1 | EGLN1   |
| ELF1 | EGR1    |
| ELF1 | EGR3    |
| ELF1 | EHBP1   |
| ELF1 | EHBP1L1 |
| ELF1 | EHD1    |
| ELF1 | EHD4    |
| ELF1 | EHMT1   |
| ELF1 | EI24    |
| ELF1 | EID1    |
| ELF1 | EID2    |
| ELF1 | EID2B   |
| ELF1 | EID3    |
| ELF1 | EIF1    |
| ELF1 | EIF1B   |
| ELF1 | EIF2A   |
| ELF1 | EIF2AK1 |
| ELF1 | EIF2AK2 |
| ELF1 | EIF2AK3 |
| ELF1 | EIF2AK4 |
| ELF1 | EIF2B1  |
| ELF1 | EIF2B2  |
| ELF1 | EIF2B5  |
| ELF1 | EIF2D   |
| ELF1 | EIF2S2  |
| ELF1 | EIF2S3  |
| ELF1 | EIF3A   |
| ELF1 | EIF3D   |
| ELF1 | EIF3E   |
| ELF1 | EIF3F   |
| ELF1 | EIF3G   |
| ELF1 | EIF3H   |
| ELF1 | EIF3I   |
| ELF1 | EIF3K   |
| ELF1 | EIF3L   |
| ELF1 | EIF3M   |
| ELF1 | EIF4A2  |
| ELF1 | EIF4A3  |
| ELF1 | EIF4B   |
| ELF1 | EIF4E   |

|      |              |
|------|--------------|
| ELF1 | EIF4E2       |
| ELF1 | EIF4EBP2     |
| ELF1 | EIF4G1       |
| ELF1 | EIF4G2       |
| ELF1 | EIF4G3       |
| ELF1 | EIF4H        |
| ELF1 | EIF5         |
| ELF1 | EIF5A2       |
| ELF1 | ELAC2        |
| ELF1 | ELAVL1       |
| ELF1 | ELF1         |
| ELF1 | ELF2         |
| ELF1 | ELF4         |
| ELF1 | ELK3         |
| ELF1 | ELK4         |
| ELF1 | ELM01        |
| ELF1 | EL0VL1       |
| ELF1 | EL0VL5       |
| ELF1 | EL0VL6       |
| ELF1 | ELP3         |
| ELF1 | ELP5         |
| ELF1 | ELP6         |
| ELF1 | EMB          |
| ELF1 | EMC2         |
| ELF1 | EMC3         |
| ELF1 | EMC4         |
| ELF1 | EMC6         |
| ELF1 | EMC8         |
| ELF1 | EMC9         |
| ELF1 | EMD          |
| ELF1 | EME1         |
| ELF1 | EML2         |
| ELF1 | EMSY         |
| ELF1 | ENDOV        |
| ELF1 | EN02         |
| ELF1 | ENOPH1       |
| ELF1 | ENOX2        |
| ELF1 | ENSA         |
| ELF1 | ENTPD4       |
| ELF1 | ENY2         |
| ELF1 | EP300        |
| ELF1 | EP400        |
| ELF1 | EPB41L4A-AS1 |
| ELF1 | EPC1         |
| ELF1 | EPC2         |
| ELF1 | EPCAM        |
| ELF1 | EPG5         |
| ELF1 | EPM2A        |
| ELF1 | EPS15        |
| ELF1 | EPS15L1      |

|      |         |
|------|---------|
| ELF1 | EPS8    |
| ELF1 | ERBIN   |
| ELF1 | ERC1    |
| ELF1 | ERCC4   |
| ELF1 | ERCC6L  |
| ELF1 | ERCC6L2 |
| ELF1 | ERGIC1  |
| ELF1 | ERH     |
| ELF1 | ERI1    |
| ELF1 | ERI2    |
| ELF1 | ERICH1  |
| ELF1 | ERMARD  |
| ELF1 | ERP29   |
| ELF1 | ERP44   |
| ELF1 | ERV3-1  |
| ELF1 | ESC02   |
| ELF1 | ESD     |
| ELF1 | ESPL1   |
| ELF1 | ESR2    |
| ELF1 | ETFB    |
| ELF1 | ETFDH   |
| ELF1 | ETNK1   |
| ELF1 | ETS1    |
| ELF1 | ETV7    |
| ELF1 | EVC2    |
| ELF1 | EVI2A   |
| ELF1 | EVI2B   |
| ELF1 | EVL     |
| ELF1 | EWSR1   |
| ELF1 | EX05    |
| ELF1 | EX0C1   |
| ELF1 | EX0C3   |
| ELF1 | EX0C5   |
| ELF1 | EX0C6   |
| ELF1 | EX0C7   |
| ELF1 | EX0G    |
| ELF1 | EX0SC1  |
| ELF1 | EX0SC10 |
| ELF1 | EX0SC3  |
| ELF1 | EX0SC6  |
| ELF1 | EX0SC9  |
| ELF1 | EYA2    |
| ELF1 | EYA3    |
| ELF1 | EZH2    |
| ELF1 | EZR     |
| ELF1 | FAAH    |
| ELF1 | FAAP20  |
| ELF1 | FAAP24  |
| ELF1 | FADD    |
| ELF1 | FADS1   |

|      |           |
|------|-----------|
| ELF1 | FADS3     |
| ELF1 | FAF1      |
| ELF1 | FAF2      |
| ELF1 | FAHD1     |
| ELF1 | FAHD2A    |
| ELF1 | FAM102A   |
| ELF1 | FAM104A   |
| ELF1 | FAM104B   |
| ELF1 | FAM107B   |
| ELF1 | FAM110A   |
| ELF1 | FAM111A   |
| ELF1 | FAM111B   |
| ELF1 | FAM118B   |
| ELF1 | FAM120A   |
| ELF1 | FAM120AOS |
| ELF1 | FAM122B   |
| ELF1 | FAM126A   |
| ELF1 | FAM126B   |
| ELF1 | FAM129A   |
| ELF1 | FAM133B   |
| ELF1 | FAM13B    |
| ELF1 | FAM160A2  |
| ELF1 | FAM160B1  |
| ELF1 | FAM177A1  |
| ELF1 | FAM184A   |
| ELF1 | FAM185A   |
| ELF1 | FAM192A   |
| ELF1 | FAM200B   |
| ELF1 | FAM204A   |
| ELF1 | FAM207A   |
| ELF1 | FAM208A   |
| ELF1 | FAM208B   |
| ELF1 | FAM210A   |
| ELF1 | FAM214A   |
| ELF1 | FAM219B   |
| ELF1 | FAM24B    |
| ELF1 | FAM32A    |
| ELF1 | FAM3C     |
| ELF1 | FAM45A    |
| ELF1 | FAM49A    |
| ELF1 | FAM49B    |
| ELF1 | FAM50A    |
| ELF1 | FAM50B    |
| ELF1 | FAM53B    |
| ELF1 | FAM53C    |
| ELF1 | FAM69A    |
| ELF1 | FAM72B    |
| ELF1 | FAM72C    |
| ELF1 | FAM72D    |
| ELF1 | FAM76B    |

|      |        |
|------|--------|
| ELF1 | FAM83D |
| ELF1 | FAM96A |
| ELF1 | FAM96B |
| ELF1 | FAM98A |
| ELF1 | FAM98B |
| ELF1 | FANCA  |
| ELF1 | FANCB  |
| ELF1 | FANCD2 |
| ELF1 | FANCF  |
| ELF1 | FANCG  |
| ELF1 | FANCI  |
| ELF1 | FANCL  |
| ELF1 | FANCM  |
| ELF1 | FARP2  |
| ELF1 | FARS2  |
| ELF1 | FAS    |
| ELF1 | FAU    |
| ELF1 | FBRS   |
| ELF1 | FBXL12 |
| ELF1 | FBXL15 |
| ELF1 | FBXL17 |
| ELF1 | FBXL3  |
| ELF1 | FBXL4  |
| ELF1 | FBXL5  |
| ELF1 | FBX011 |
| ELF1 | FBX021 |
| ELF1 | FBX022 |
| ELF1 | FBX028 |
| ELF1 | FBX03  |
| ELF1 | FBX030 |
| ELF1 | FBX031 |
| ELF1 | FBX034 |
| ELF1 | FBX04  |
| ELF1 | FBX046 |
| ELF1 | FBX048 |
| ELF1 | FBX05  |
| ELF1 | FBX07  |
| ELF1 | FBX08  |
| ELF1 | FBX09  |
| ELF1 | FBXW2  |
| ELF1 | FBXW5  |
| ELF1 | FBXW7  |
| ELF1 | FBXW8  |
| ELF1 | FCF1   |
| ELF1 | FCH01  |
| ELF1 | FCRL3  |
| ELF1 | FCRLA  |
| ELF1 | FDFT1  |
| ELF1 | FDPS   |
| ELF1 | FDX1   |

|      |          |
|------|----------|
| ELF1 | FDXR     |
| ELF1 | FECH     |
| ELF1 | FEM1A    |
| ELF1 | FEM1B    |
| ELF1 | FEN1     |
| ELF1 | FERMT3   |
| ELF1 | FEZ2     |
| ELF1 | FGD5-AS1 |
| ELF1 | FGFR10P  |
| ELF1 | FGFR10P2 |
| ELF1 | FH       |
| ELF1 | FHOD3    |
| ELF1 | FIBP     |
| ELF1 | FIG4     |
| ELF1 | FIP1L1   |
| ELF1 | FKBP15   |
| ELF1 | FKBP1A   |
| ELF1 | FKBP3    |
| ELF1 | FKBP5    |
| ELF1 | FKBP7    |
| ELF1 | FKBP8    |
| ELF1 | FKBPL    |
| ELF1 | FLI1     |
| ELF1 | FLII     |
| ELF1 | FLOT1    |
| ELF1 | FLOT2    |
| ELF1 | FLVCR1   |
| ELF1 | FMNL1    |
| ELF1 | FMR1     |
| ELF1 | FN3KRP   |
| ELF1 | FNBP1    |
| ELF1 | FNBP4    |
| ELF1 | FNIP1    |
| ELF1 | FNTA     |
| ELF1 | FOPNL    |
| ELF1 | FOS      |
| ELF1 | FOXM1    |
| ELF1 | FOXN2    |
| ELF1 | FOXN3    |
| ELF1 | FOXP1    |
| ELF1 | FRA10AC1 |
| ELF1 | FRG1     |
| ELF1 | FRMD8    |
| ELF1 | FRYL     |
| ELF1 | FSD1L    |
| ELF1 | FTH1     |
| ELF1 | FUBP1    |
| ELF1 | FUBP3    |
| ELF1 | FUCA1    |
| ELF1 | FUNDC1   |

|      |            |
|------|------------|
| ELF1 | FUNDC2     |
| ELF1 | FUS        |
| ELF1 | FXR1       |
| ELF1 | FYTDD1     |
| ELF1 | FZR1       |
| ELF1 | G2E3       |
| ELF1 | G3BP1      |
| ELF1 | G3BP2      |
| ELF1 | GABARAP    |
| ELF1 | GABARAPL2  |
| ELF1 | GABPA      |
| ELF1 | GABPB1     |
| ELF1 | GABPB1-AS1 |
| ELF1 | GABPB2     |
| ELF1 | GADD45B    |
| ELF1 | GAK        |
| ELF1 | GALNT14    |
| ELF1 | GALNT6     |
| ELF1 | GALNT7     |
| ELF1 | GAMT       |
| ELF1 | GAPDH      |
| ELF1 | GAPVD1     |
| ELF1 | GARS       |
| ELF1 | GAS2L3     |
| ELF1 | GATAD2A    |
| ELF1 | GATAD2B    |
| ELF1 | GATM       |
| ELF1 | GBA        |
| ELF1 | GBE1       |
| ELF1 | GCA        |
| ELF1 | GCC2       |
| ELF1 | GCH1       |
| ELF1 | GCHFR      |
| ELF1 | GCNT2      |
| ELF1 | GCSAM      |
| ELF1 | GDAP1      |
| ELF1 | GDAP2      |
| ELF1 | GDE1       |
| ELF1 | GDI2       |
| ELF1 | GDPD5      |
| ELF1 | GEMIN2     |
| ELF1 | GEMIN6     |
| ELF1 | GEMIN7     |
| ELF1 | GFER       |
| ELF1 | GFI1       |
| ELF1 | GFM1       |
| ELF1 | GFM2       |
| ELF1 | GFOD1      |
| ELF1 | GFOD2      |
| ELF1 | GFPT1      |



|      |        |
|------|--------|
| ELF1 | GGA1   |
| ELF1 | GGA2   |
| ELF1 | GGCT   |
| ELF1 | GGCX   |
| ELF1 | GGH    |
| ELF1 | GGNBP2 |
| ELF1 | GGPS1  |
| ELF1 | GHITM  |
| ELF1 | GHRL   |
| ELF1 | GID8   |
| ELF1 | GIGYF2 |
| ELF1 | GINM1  |
| ELF1 | GINS1  |
| ELF1 | GINS2  |
| ELF1 | GINS3  |
| ELF1 | GINS4  |
| ELF1 | GIT2   |
| ELF1 | GKAP1  |
| ELF1 | GLA    |
| ELF1 | GLB1   |
| ELF1 | GLCE   |
| ELF1 | GLE1   |
| ELF1 | GLG1   |
| ELF1 | GL01   |
| ELF1 | GL0D4  |
| ELF1 | GLRX   |
| ELF1 | GLRX3  |
| ELF1 | GLRX5  |
| ELF1 | GLS    |
| ELF1 | GLTP   |
| ELF1 | GLUD1  |
| ELF1 | GLUL   |
| ELF1 | GLYCTK |
| ELF1 | GMCL1  |
| ELF1 | GMDS   |
| ELF1 | GMEB1  |
| ELF1 | GMFB   |
| ELF1 | GMFG   |
| ELF1 | GMIP   |
| ELF1 | GMNN   |
| ELF1 | GMPR2  |
| ELF1 | GMPS   |
| ELF1 | GNA13  |
| ELF1 | GNAI2  |
| ELF1 | GNAI3  |
| ELF1 | GNAS   |
| ELF1 | GNAZ   |
| ELF1 | GNB1   |
| ELF1 | GNB2   |
| ELF1 | GNB4   |

|      |          |
|------|----------|
| ELF1 | GNB5     |
| ELF1 | GNG10    |
| ELF1 | GNG2     |
| ELF1 | GNG5     |
| ELF1 | GNGT2    |
| ELF1 | GNL1     |
| ELF1 | GNPAT    |
| ELF1 | GOLGA2   |
| ELF1 | GOLGA3   |
| ELF1 | GOLGA7   |
| ELF1 | GOLGB1   |
| ELF1 | GOLPH3   |
| ELF1 | GOLT1B   |
| ELF1 | GOPC     |
| ELF1 | GORASP2  |
| ELF1 | GOSR1    |
| ELF1 | GOT1     |
| ELF1 | GOT2     |
| ELF1 | GPAA1    |
| ELF1 | GPANK1   |
| ELF1 | GPATCH11 |
| ELF1 | GPATCH2L |
| ELF1 | GPATCH8  |
| ELF1 | GPBP1    |
| ELF1 | GPBP1L1  |
| ELF1 | GPCPD1   |
| ELF1 | GPI      |
| ELF1 | GPM6B    |
| ELF1 | GPN1     |
| ELF1 | GPN2     |
| ELF1 | GPN3     |
| ELF1 | GPR107   |
| ELF1 | GPR143   |
| ELF1 | GPR160   |
| ELF1 | GPR18    |
| ELF1 | GPR180   |
| ELF1 | GPR82    |
| ELF1 | GPR89A   |
| ELF1 | GPS1     |
| ELF1 | GPSM2    |
| ELF1 | GPSM3    |
| ELF1 | GPT2     |
| ELF1 | GPX4     |
| ELF1 | GPX7     |
| ELF1 | GRAMD1A  |
| ELF1 | GRAPL    |
| ELF1 | GRB2     |
| ELF1 | GRIPAP1  |
| ELF1 | GRK2     |
| ELF1 | GRK6     |

|      |           |
|------|-----------|
| ELF1 | GRSF1     |
| ELF1 | GSDMD     |
| ELF1 | GSK3B     |
| ELF1 | GSKIP     |
| ELF1 | GSPT1     |
| ELF1 | GSPT2     |
| ELF1 | GSS       |
| ELF1 | GSTA4     |
| ELF1 | GSTCD     |
| ELF1 | GSTK1     |
| ELF1 | GSTO1     |
| ELF1 | GTDC1     |
| ELF1 | GTF2A1    |
| ELF1 | GTF2A2    |
| ELF1 | GTF2B     |
| ELF1 | GTF2E2    |
| ELF1 | GTF2F1    |
| ELF1 | GTF2F2    |
| ELF1 | GTF2H5    |
| ELF1 | GTF2I     |
| ELF1 | GTF2IRD2  |
| ELF1 | GTF2IRD2B |
| ELF1 | GTF3C1    |
| ELF1 | GTF3C3    |
| ELF1 | GTF3C5    |
| ELF1 | GTPBP1    |
| ELF1 | GTPBP8    |
| ELF1 | GTSE1     |
| ELF1 | GUCD1     |
| ELF1 | GUK1      |
| ELF1 | GUSB      |
| ELF1 | GXYLT1    |
| ELF1 | GYG1      |
| ELF1 | GYPC      |
| ELF1 | GZF1      |
| ELF1 | H1FX      |
| ELF1 | H1FX-AS1  |
| ELF1 | H2AFJ     |
| ELF1 | H2AFV     |
| ELF1 | H2AFX     |
| ELF1 | H2AFY     |
| ELF1 | H2AFZ     |
| ELF1 | H3F3A     |
| ELF1 | H3F3B     |
| ELF1 | HACD1     |
| ELF1 | HACD2     |
| ELF1 | HACD3     |
| ELF1 | HACD4     |
| ELF1 | HADHA     |
| ELF1 | HADHB     |

|      |         |
|------|---------|
| ELF1 | HARS    |
| ELF1 | HARS2   |
| ELF1 | HAT1    |
| ELF1 | HAUS1   |
| ELF1 | HAUS2   |
| ELF1 | HAUS3   |
| ELF1 | HAUS4   |
| ELF1 | HAUS5   |
| ELF1 | HAUS6   |
| ELF1 | HAUS8   |
| ELF1 | HBP1    |
| ELF1 | HBS1L   |
| ELF1 | HCCS    |
| ELF1 | HCLS1   |
| ELF1 | HDAC1   |
| ELF1 | HDAC10  |
| ELF1 | HDAC2   |
| ELF1 | HDAC3   |
| ELF1 | HDAC5   |
| ELF1 | HDAC6   |
| ELF1 | HDAC7   |
| ELF1 | HDAC9   |
| ELF1 | HDDC2   |
| ELF1 | HDGF    |
| ELF1 | HDHD2   |
| ELF1 | HDHD3   |
| ELF1 | HDX     |
| ELF1 | HECA    |
| ELF1 | HECTD1  |
| ELF1 | HECTD4  |
| ELF1 | HELLS   |
| ELF1 | HELQ    |
| ELF1 | HELZ    |
| ELF1 | HELZ2   |
| ELF1 | HEMK1   |
| ELF1 | HERC1   |
| ELF1 | HERC2   |
| ELF1 | HERC3   |
| ELF1 | HERC4   |
| ELF1 | HERPUD2 |
| ELF1 | HES6    |
| ELF1 | HGH1    |
| ELF1 | HGSNAT  |
| ELF1 | HHEX    |
| ELF1 | HHLA3   |
| ELF1 | HIBCH   |
| ELF1 | HIF1A   |
| ELF1 | HIF1AN  |
| ELF1 | HIGD1A  |
| ELF1 | HIGD2A  |

|      |           |
|------|-----------|
| ELF1 | HINT1     |
| ELF1 | HINT2     |
| ELF1 | HIP1R     |
| ELF1 | HIRIP3    |
| ELF1 | HIST1H1A  |
| ELF1 | HIST1H1D  |
| ELF1 | HIST1H1E  |
| ELF1 | HIST2H2AC |
| ELF1 | HIST2H2BE |
| ELF1 | HJURP     |
| ELF1 | HK1       |
| ELF1 | HKR1      |
| ELF1 | HLA-DMA   |
| ELF1 | HLA-DMB   |
| ELF1 | HLA-DPA1  |
| ELF1 | HLA-DPB1  |
| ELF1 | HLA-DQA2  |
| ELF1 | HLA-DRA   |
| ELF1 | HLA-DRB1  |
| ELF1 | HLA-DRB5  |
| ELF1 | HLTF      |
| ELF1 | HMG20A    |
| ELF1 | HMG20B    |
| ELF1 | HMGA1     |
| ELF1 | HMGB1     |
| ELF1 | HMGB2     |
| ELF1 | HMGB3     |
| ELF1 | HMGCS1    |
| ELF1 | HMGN1     |
| ELF1 | HMGN2     |
| ELF1 | HMGN3     |
| ELF1 | HMGN4     |
| ELF1 | HMGN5     |
| ELF1 | HMGXB3    |
| ELF1 | HMGXB4    |
| ELF1 | HMMR      |
| ELF1 | HMOX2     |
| ELF1 | HNRNPA0   |
| ELF1 | HNRNPA1   |
| ELF1 | HNRNPA1L2 |
| ELF1 | HNRNPA2B1 |
| ELF1 | HNRNPA3   |
| ELF1 | HNRNPAB   |
| ELF1 | HNRNPC    |
| ELF1 | HNRNPD    |
| ELF1 | HNRNPF    |
| ELF1 | HNRNPH1   |
| ELF1 | HNRNPH2   |
| ELF1 | HNRNPH3   |
| ELF1 | HNRNPK    |

|      |          |
|------|----------|
| ELF1 | HNRNPL   |
| ELF1 | HNRNPM   |
| ELF1 | HNRNPR   |
| ELF1 | HNRNPU   |
| ELF1 | HNRNPUL1 |
| ELF1 | HNRNPUL2 |
| ELF1 | H00K2    |
| ELF1 | HOPX     |
| ELF1 | H0XA7    |
| ELF1 | H0XB4    |
| ELF1 | HP1BP3   |
| ELF1 | HPF1     |
| ELF1 | HPRT1    |
| ELF1 | HPS1     |
| ELF1 | HPS3     |
| ELF1 | HPS4     |
| ELF1 | HPS5     |
| ELF1 | HPS6     |
| ELF1 | HRK      |
| ELF1 | HS2ST1   |
| ELF1 | HSBP1    |
| ELF1 | HSCB     |
| ELF1 | HSD17B10 |
| ELF1 | HSD17B11 |
| ELF1 | HSD17B12 |
| ELF1 | HSD17B4  |
| ELF1 | HSD17B7  |
| ELF1 | HSDL2    |
| ELF1 | HSF1     |
| ELF1 | HSF2     |
| ELF1 | HSP90AA1 |
| ELF1 | HSPA2    |
| ELF1 | HSPA4    |
| ELF1 | HSPA8    |
| ELF1 | HSPB11   |
| ELF1 | HSPBAP1  |
| ELF1 | HSPBP1   |
| ELF1 | HSPH1    |
| ELF1 | HTATSF1  |
| ELF1 | HTR3A    |
| ELF1 | HTRA2    |
| ELF1 | HTT      |
| ELF1 | HUS1     |
| ELF1 | HUWE1    |
| ELF1 | HVCN1    |
| ELF1 | HYLS1    |
| ELF1 | HYPK     |
| ELF1 | IARS2    |
| ELF1 | IBTK     |
| ELF1 | ICA1     |

|      |         |
|------|---------|
| ELF1 | ICE1    |
| ELF1 | ICE2    |
| ELF1 | ICOSLG  |
| ELF1 | IDH1    |
| ELF1 | IDH2    |
| ELF1 | IDH3B   |
| ELF1 | IDH3G   |
| ELF1 | IDI1    |
| ELF1 | IDNK    |
| ELF1 | IDS     |
| ELF1 | IER2    |
| ELF1 | IER3IP1 |
| ELF1 | IFI16   |
| ELF1 | IFI27L1 |
| ELF1 | IFI27L2 |
| ELF1 | IFNGR2  |
| ELF1 | IFNLR1  |
| ELF1 | IFT43   |
| ELF1 | IFT74   |
| ELF1 | IFT81   |
| ELF1 | IFT88   |
| ELF1 | IGBP1   |
| ELF1 | IGF2BP3 |
| ELF1 | IK      |
| ELF1 | IKBKE   |
| ELF1 | IKBKG   |
| ELF1 | IKZF1   |
| ELF1 | IKZF3   |
| ELF1 | IL10    |
| ELF1 | IL12RB1 |
| ELF1 | IL16    |
| ELF1 | IL17C   |
| ELF1 | IL4R    |
| ELF1 | ILF2    |
| ELF1 | ILF3    |
| ELF1 | ILK     |
| ELF1 | ILKAP   |
| ELF1 | ILVBL   |
| ELF1 | IMMP1L  |
| ELF1 | IMMT    |
| ELF1 | IMP3    |
| ELF1 | IMP4    |
| ELF1 | IMPA1   |
| ELF1 | IMPA2   |
| ELF1 | INAFM1  |
| ELF1 | INCENP  |
| ELF1 | ING1    |
| ELF1 | ING2    |
| ELF1 | ING3    |
| ELF1 | ING4    |

|      |           |
|------|-----------|
| ELF1 | INIP      |
| ELF1 | IN080     |
| ELF1 | IN080E    |
| ELF1 | INPP5B    |
| ELF1 | INPP5D    |
| ELF1 | INPP5K    |
| ELF1 | INTS10    |
| ELF1 | INTS12    |
| ELF1 | INTS4     |
| ELF1 | INTS6     |
| ELF1 | INTS6-AS1 |
| ELF1 | INTS7     |
| ELF1 | INTS8     |
| ELF1 | INTS9     |
| ELF1 | IP6K1     |
| ELF1 | IP6K2     |
| ELF1 | IP05      |
| ELF1 | IP09      |
| ELF1 | IPPK      |
| ELF1 | IQCB1     |
| ELF1 | IQCD      |
| ELF1 | IQGAP1    |
| ELF1 | IRAK4     |
| ELF1 | IREB2     |
| ELF1 | IRF2      |
| ELF1 | IRF8      |
| ELF1 | IRS1      |
| ELF1 | IRS2      |
| ELF1 | ISCA2     |
| ELF1 | ISCU      |
| ELF1 | ISG20     |
| ELF1 | ISG20L2   |
| ELF1 | ISL2      |
| ELF1 | IST1      |
| ELF1 | ISY1      |
| ELF1 | ITFG1     |
| ELF1 | ITGAE     |
| ELF1 | ITGAL     |
| ELF1 | ITGB1     |
| ELF1 | ITGB1BP1  |
| ELF1 | ITGB2     |
| ELF1 | ITGB2-AS1 |
| ELF1 | ITGB3BP   |
| ELF1 | ITPA      |
| ELF1 | ITPKB     |
| ELF1 | ITPR1     |
| ELF1 | ITPR3     |
| ELF1 | ITPRIPL2  |
| ELF1 | ITSN2     |
| ELF1 | IVD       |



|      |          |
|------|----------|
| ELF1 | IWS1     |
| ELF1 | JADE1    |
| ELF1 | JADE2    |
| ELF1 | JAK1     |
| ELF1 | JMJD1C   |
| ELF1 | JMJD6    |
| ELF1 | JRK      |
| ELF1 | JUND     |
| ELF1 | JUP      |
| ELF1 | KANSL1   |
| ELF1 | KANSL2   |
| ELF1 | KANSL3   |
| ELF1 | KAT5     |
| ELF1 | KAT6A    |
| ELF1 | KATNA1   |
| ELF1 | KATNAL1  |
| ELF1 | KATNBL1  |
| ELF1 | KBTBD2   |
| ELF1 | KBTBD3   |
| ELF1 | KBTBD4   |
| ELF1 | KCMF1    |
| ELF1 | KCNAB2   |
| ELF1 | KCNK12   |
| ELF1 | KCNMB3   |
| ELF1 | KCNMB4   |
| ELF1 | KCNQ10T1 |
| ELF1 | KCTD18   |
| ELF1 | KCTD20   |
| ELF1 | KCTD5    |
| ELF1 | KCTD7    |
| ELF1 | KCTD9    |
| ELF1 | KDELRL1  |
| ELF1 | KDM1A    |
| ELF1 | KDM1B    |
| ELF1 | KDM2B    |
| ELF1 | KDM3A    |
| ELF1 | KDM4A    |
| ELF1 | KDM5A    |
| ELF1 | KDM5D    |
| ELF1 | KDM6A    |
| ELF1 | KDSR     |
| ELF1 | KEAP1    |
| ELF1 | KHDRBS1  |
| ELF1 | KHNYN    |
| ELF1 | KHSRP    |
| ELF1 | KIAA0232 |
| ELF1 | KIAA0355 |
| ELF1 | KIAA0586 |
| ELF1 | KIAA1143 |
| ELF1 | KIAA1217 |

|      |           |
|------|-----------|
| ELF1 | KIAA1328  |
| ELF1 | KIAA2026  |
| ELF1 | KIDINS220 |
| ELF1 | KIF11     |
| ELF1 | KIF13A    |
| ELF1 | KIF14     |
| ELF1 | KIF18B    |
| ELF1 | KIF20A    |
| ELF1 | KIF20B    |
| ELF1 | KIF22     |
| ELF1 | KIF23     |
| ELF1 | KIF2A     |
| ELF1 | KIF2C     |
| ELF1 | KIF3A     |
| ELF1 | KIF4A     |
| ELF1 | KIF5B     |
| ELF1 | KIFC1     |
| ELF1 | KIN       |
| ELF1 | KIZ       |
| ELF1 | KLC1      |
| ELF1 | KLF12     |
| ELF1 | KLF6      |
| ELF1 | KLHDC2    |
| ELF1 | KLHDC3    |
| ELF1 | KLHL18    |
| ELF1 | KLHL2     |
| ELF1 | KLHL22    |
| ELF1 | KLHL23    |
| ELF1 | KLHL24    |
| ELF1 | KLHL36    |
| ELF1 | KLHL42    |
| ELF1 | KLHL5     |
| ELF1 | KLHL6     |
| ELF1 | KLHL7     |
| ELF1 | KMT2A     |
| ELF1 | KMT2C     |
| ELF1 | KMT2E     |
| ELF1 | KMT5A     |
| ELF1 | KMT5B     |
| ELF1 | KMT5C     |
| ELF1 | KNSTRN    |
| ELF1 | KNTC1     |
| ELF1 | KPNA1     |
| ELF1 | KPNA2     |
| ELF1 | KPNA3     |
| ELF1 | KPNA4     |
| ELF1 | KPNB1     |
| ELF1 | KRAS      |
| ELF1 | KRCC1     |
| ELF1 | KRI1      |

|      |         |
|------|---------|
| ELF1 | KRIT1   |
| ELF1 | KRR1    |
| ELF1 | KRTCAP2 |
| ELF1 | KTN1    |
| ELF1 | KXD1    |
| ELF1 | KYAT3   |
| ELF1 | L1TD1   |
| ELF1 | L3MBTL2 |
| ELF1 | LACC1   |
| ELF1 | LAGE3   |
| ELF1 | LAMP1   |
| ELF1 | LAMTOR1 |
| ELF1 | LAMTOR2 |
| ELF1 | LAMTOR3 |
| ELF1 | LAMTOR4 |
| ELF1 | LAMTOR5 |
| ELF1 | LAP3    |
| ELF1 | LAPTM5  |
| ELF1 | LARP4B  |
| ELF1 | LARP7   |
| ELF1 | LARS    |
| ELF1 | LAS1L   |
| ELF1 | LASP1   |
| ELF1 | LAT2    |
| ELF1 | LBR     |
| ELF1 | LCK     |
| ELF1 | LCMT1   |
| ELF1 | LCOR    |
| ELF1 | LCORL   |
| ELF1 | LCP1    |
| ELF1 | LDB1    |
| ELF1 | LDHB    |
| ELF1 | LDLR    |
| ELF1 | LEAP2   |
| ELF1 | LEF1    |
| ELF1 | LEMD2   |
| ELF1 | LENG8   |
| ELF1 | LEO1    |
| ELF1 | LEPROT  |
| ELF1 | LETMD1  |
| ELF1 | LGALS8  |
| ELF1 | LHPP    |
| ELF1 | LIG1    |
| ELF1 | LILRB1  |
| ELF1 | LIMA1   |
| ELF1 | LIMD2   |
| ELF1 | LIMK1   |
| ELF1 | LIMK2   |
| ELF1 | LIMS1   |
| ELF1 | LIN52   |

|      |           |
|------|-----------|
| ELF1 | LIN9      |
| ELF1 | LINC00426 |
| ELF1 | LINC00467 |
| ELF1 | LINC00476 |
| ELF1 | LINC00487 |
| ELF1 | LINC00526 |
| ELF1 | LINC00623 |
| ELF1 | LINC00667 |
| ELF1 | LINC00877 |
| ELF1 | LINC00909 |
| ELF1 | LINC01013 |
| ELF1 | LINC01116 |
| ELF1 | LINC01184 |
| ELF1 | LINC01215 |
| ELF1 | LIPE      |
| ELF1 | LITAF     |
| ELF1 | LLPH      |
| ELF1 | LMBRD1    |
| ELF1 | LMNB1     |
| ELF1 | LM02      |
| ELF1 | LM04      |
| ELF1 | LM07      |
| ELF1 | LNPEP     |
| ELF1 | LONP2     |
| ELF1 | LONRF1    |
| ELF1 | LOXL2     |
| ELF1 | LPCAT3    |
| ELF1 | LPGAT1    |
| ELF1 | LPIN1     |
| ELF1 | LPIN2     |
| ELF1 | LPP       |
| ELF1 | LPP-AS2   |
| ELF1 | LPXN      |
| ELF1 | LRBA      |
| ELF1 | LRCH1     |
| ELF1 | LRCH3     |
| ELF1 | LRCH4     |
| ELF1 | LRIF1     |
| ELF1 | LRMP      |
| ELF1 | LRP10     |
| ELF1 | LRR1      |
| ELF1 | LRRC2     |
| ELF1 | LRRC23    |
| ELF1 | LRRC28    |
| ELF1 | LRRC32    |
| ELF1 | LRRC37B   |
| ELF1 | LRRC41    |
| ELF1 | LRRC47    |
| ELF1 | LRRC57    |
| ELF1 | LRRC61    |

|      |          |
|------|----------|
| ELF1 | LRRCC1   |
| ELF1 | LRRFIP1  |
| ELF1 | LRRFIP2  |
| ELF1 | LRRK1    |
| ELF1 | LRTOMT   |
| ELF1 | LRWD1    |
| ELF1 | LSG1     |
| ELF1 | LSM1     |
| ELF1 | LSM12    |
| ELF1 | LSM14A   |
| ELF1 | LSM3     |
| ELF1 | LSM4     |
| ELF1 | LSM5     |
| ELF1 | LSM6     |
| ELF1 | LSM8     |
| ELF1 | LTA4H    |
| ELF1 | LTB      |
| ELF1 | LTBP1    |
| ELF1 | LTN1     |
| ELF1 | LUC7L    |
| ELF1 | LUC7L2   |
| ELF1 | LUC7L3   |
| ELF1 | LXN      |
| ELF1 | LY86     |
| ELF1 | LYL1     |
| ELF1 | LYN      |
| ELF1 | LYPLA1   |
| ELF1 | LYPLAL1  |
| ELF1 | LYRM1    |
| ELF1 | LYRM2    |
| ELF1 | LYSMD2   |
| ELF1 | LZIC     |
| ELF1 | M6PR     |
| ELF1 | MAD1L1   |
| ELF1 | MAD2L1   |
| ELF1 | MAD2L1BP |
| ELF1 | MAD2L2   |
| ELF1 | MADD     |
| ELF1 | MAEA     |
| ELF1 | MAF1     |
| ELF1 | MAFG     |
| ELF1 | MAGED2   |
| ELF1 | MAGEF1   |
| ELF1 | MAGOH    |
| ELF1 | MAGOHB   |
| ELF1 | MALT1    |
| ELF1 | MAP1B    |
| ELF1 | MAP1LC3B |
| ELF1 | MAP1S    |
| ELF1 | MAP2     |

|      |           |
|------|-----------|
| ELF1 | MAP2K1    |
| ELF1 | MAP2K2    |
| ELF1 | MAP2K4    |
| ELF1 | MAP2K6    |
| ELF1 | MAP3K11   |
| ELF1 | MAP3K3    |
| ELF1 | MAP3K4    |
| ELF1 | MAP3K7    |
| ELF1 | MAP3K9    |
| ELF1 | MAP4      |
| ELF1 | MAP4K1    |
| ELF1 | MAP4K2    |
| ELF1 | MAP4K4    |
| ELF1 | MAP4K5    |
| ELF1 | MAP7D1    |
| ELF1 | MAP7D3    |
| ELF1 | MAPK1     |
| ELF1 | MAPK10    |
| ELF1 | MAPK14    |
| ELF1 | MAPK1IP1L |
| ELF1 | MAPK9     |
| ELF1 | MAPKAP1   |
| ELF1 | MAPRE1    |
| ELF1 | MAPRE2    |
| ELF1 | MARCH1    |
| ELF1 | MARCH5    |
| ELF1 | MARCH6    |
| ELF1 | MARCH7    |
| ELF1 | MARCH8    |
| ELF1 | MARCH9    |
| ELF1 | MARCKSL1  |
| ELF1 | MARK2     |
| ELF1 | MARK3     |
| ELF1 | MAST2     |
| ELF1 | MASTL     |
| ELF1 | MAT2A     |
| ELF1 | MAT2B     |
| ELF1 | MAU2      |
| ELF1 | MAX       |
| ELF1 | MAZ       |
| ELF1 | MBD2      |
| ELF1 | MBD4      |
| ELF1 | MBD5      |
| ELF1 | MBNL1     |
| ELF1 | MBP       |
| ELF1 | MCCC1     |
| ELF1 | MCL1      |
| ELF1 | MCM10     |
| ELF1 | MCM2      |
| ELF1 | MCM3      |

|      |          |
|------|----------|
| ELF1 | MCM4     |
| ELF1 | MCM5     |
| ELF1 | MCM6     |
| ELF1 | MCM7     |
| ELF1 | MCMBP    |
| ELF1 | MCPH1    |
| ELF1 | MCRS1    |
| ELF1 | MCTP2    |
| ELF1 | MCTS1    |
| ELF1 | MDC1     |
| ELF1 | MDFIC    |
| ELF1 | MDH1     |
| ELF1 | MDH2     |
| ELF1 | MDM1     |
| ELF1 | MDM2     |
| ELF1 | MDM4     |
| ELF1 | MDN1     |
| ELF1 | MEA1     |
| ELF1 | MEAF6    |
| ELF1 | MECP2    |
| ELF1 | MED10    |
| ELF1 | MED11    |
| ELF1 | MED16    |
| ELF1 | MED17    |
| ELF1 | MED18    |
| ELF1 | MED20    |
| ELF1 | MED21    |
| ELF1 | MED24    |
| ELF1 | MED27    |
| ELF1 | MED28    |
| ELF1 | MED30    |
| ELF1 | MED31    |
| ELF1 | MED4     |
| ELF1 | MED6     |
| ELF1 | MED7     |
| ELF1 | MED8     |
| ELF1 | MED9     |
| ELF1 | MEF2A    |
| ELF1 | MEF2C    |
| ELF1 | MEF2D    |
| ELF1 | MEIG1    |
| ELF1 | MELK     |
| ELF1 | MELTF    |
| ELF1 | MEMO1    |
| ELF1 | MEN1     |
| ELF1 | MEPCE    |
| ELF1 | METAP1   |
| ELF1 | METAP2   |
| ELF1 | METRNL   |
| ELF1 | METTLL17 |

|      |            |
|------|------------|
| ELF1 | METTL18    |
| ELF1 | METTL21A   |
| ELF1 | METTL23    |
| ELF1 | METTL25    |
| ELF1 | METTL2A    |
| ELF1 | METTL3     |
| ELF1 | METTL4     |
| ELF1 | METTL5     |
| ELF1 | METTL6     |
| ELF1 | METTL7A    |
| ELF1 | METTL9     |
| ELF1 | MFAP1      |
| ELF1 | MFF        |
| ELF1 | MFHAS1     |
| ELF1 | MFN1       |
| ELF1 | MFN2       |
| ELF1 | MFSD10     |
| ELF1 | MFSD11     |
| ELF1 | MFSD13A    |
| ELF1 | MFSD14A    |
| ELF1 | MFSD14B    |
| ELF1 | MFSD14C    |
| ELF1 | MFSD5      |
| ELF1 | MGA        |
| ELF1 | MGME1      |
| ELF1 | MGMT       |
| ELF1 | MIA-RAB4B  |
| ELF1 | MIA3       |
| ELF1 | MICAL3     |
| ELF1 | MICB       |
| ELF1 | MICU1      |
| ELF1 | MICU2      |
| ELF1 | MICU3      |
| ELF1 | MID1IP1    |
| ELF1 | MIDN       |
| ELF1 | MIEN1      |
| ELF1 | MIER1      |
| ELF1 | MIF4GD     |
| ELF1 | MIIP       |
| ELF1 | MILR1      |
| ELF1 | MINOS1     |
| ELF1 | MIOS       |
| ELF1 | MIR181A1HG |
| ELF1 | MIR3681HG  |
| ELF1 | MIS12      |
| ELF1 | MIS18A     |
| ELF1 | MIS18BP1   |
| ELF1 | MITD1      |
| ELF1 | MKI67      |
| ELF1 | MKKS       |



|      |          |
|------|----------|
| ELF1 | MKLN1    |
| ELF1 | MKRN1    |
| ELF1 | MKRN2    |
| ELF1 | MLF2     |
| ELF1 | MLH1     |
| ELF1 | MLLT11   |
| ELF1 | MLX      |
| ELF1 | MLXIP    |
| ELF1 | MLYCD    |
| ELF1 | MMADHC   |
| ELF1 | MMD      |
| ELF1 | MME      |
| ELF1 | MMS22L   |
| ELF1 | MNAT1    |
| ELF1 | MND1     |
| ELF1 | MOB1A    |
| ELF1 | MOB1B    |
| ELF1 | MOB2     |
| ELF1 | MOB3A    |
| ELF1 | MOB4     |
| ELF1 | MOCS2    |
| ELF1 | MON1A    |
| ELF1 | MON2     |
| ELF1 | MORC4    |
| ELF1 | MORF4L1  |
| ELF1 | MORF4L2  |
| ELF1 | MOSPD3   |
| ELF1 | MPC2     |
| ELF1 | MPDU1    |
| ELF1 | MPG      |
| ELF1 | MPHOSPH8 |
| ELF1 | MPHOSPH9 |
| ELF1 | MPI      |
| ELF1 | MPLKIP   |
| ELF1 | MPND     |
| ELF1 | MPP5     |
| ELF1 | MPP6     |
| ELF1 | MPPE1    |
| ELF1 | MPV17    |
| ELF1 | MPZL1    |
| ELF1 | MRGBP    |
| ELF1 | MRM2     |
| ELF1 | MRM3     |
| ELF1 | MROH1    |
| ELF1 | MRPL1    |
| ELF1 | MRPL10   |
| ELF1 | MRPL13   |
| ELF1 | MRPL14   |
| ELF1 | MRPL15   |
| ELF1 | MRPL16   |

|      |         |
|------|---------|
| ELF1 | MRPL18  |
| ELF1 | MRPL21  |
| ELF1 | MRPL22  |
| ELF1 | MRPL23  |
| ELF1 | MRPL27  |
| ELF1 | MRPL28  |
| ELF1 | MRPL32  |
| ELF1 | MRPL33  |
| ELF1 | MRPL34  |
| ELF1 | MRPL35  |
| ELF1 | MRPL37  |
| ELF1 | MRPL39  |
| ELF1 | MRPL43  |
| ELF1 | MRPL44  |
| ELF1 | MRPL45  |
| ELF1 | MRPL47  |
| ELF1 | MRPL48  |
| ELF1 | MRPL49  |
| ELF1 | MRPL50  |
| ELF1 | MRPL51  |
| ELF1 | MRPL52  |
| ELF1 | MRPL53  |
| ELF1 | MRPL54  |
| ELF1 | MRPL57  |
| ELF1 | MRPS11  |
| ELF1 | MRPS14  |
| ELF1 | MRPS15  |
| ELF1 | MRPS16  |
| ELF1 | MRPS18A |
| ELF1 | MRPS18B |
| ELF1 | MRPS18C |
| ELF1 | MRPS2   |
| ELF1 | MRPS21  |
| ELF1 | MRPS22  |
| ELF1 | MRPS23  |
| ELF1 | MRPS25  |
| ELF1 | MRPS30  |
| ELF1 | MRPS31  |
| ELF1 | MRPS33  |
| ELF1 | MRPS34  |
| ELF1 | MRPS35  |
| ELF1 | MRPS36  |
| ELF1 | MRPS6   |
| ELF1 | MRPS7   |
| ELF1 | MRPS9   |
| ELF1 | MRRF    |
| ELF1 | MRS2    |
| ELF1 | MS4A1   |
| ELF1 | MSANTD2 |
| ELF1 | MSANTD4 |

|      |        |
|------|--------|
| ELF1 | MSH2   |
| ELF1 | MSH3   |
| ELF1 | MSH6   |
| ELF1 | MSI2   |
| ELF1 | MSL3   |
| ELF1 | MSN    |
| ELF1 | MSRA   |
| ELF1 | MSRB1  |
| ELF1 | MTA1   |
| ELF1 | MTA3   |
| ELF1 | MTBP   |
| ELF1 | MTCH2  |
| ELF1 | MTDH   |
| ELF1 | MTERF3 |
| ELF1 | MTF2   |
| ELF1 | MTFMT  |
| ELF1 | MTFR2  |
| ELF1 | MTG2   |
| ELF1 | MTHFD2 |
| ELF1 | MTHFR  |
| ELF1 | MTHFS  |
| ELF1 | MTIF2  |
| ELF1 | MTIF3  |
| ELF1 | MTMR1  |
| ELF1 | MTMR12 |
| ELF1 | MTMR14 |
| ELF1 | MTMR2  |
| ELF1 | MTMR6  |
| ELF1 | MT01   |
| ELF1 | MTOR   |
| ELF1 | MTPN   |
| ELF1 | MTR    |
| ELF1 | MTRF1L |
| ELF1 | MTX1   |
| ELF1 | MTX2   |
| ELF1 | MUS81  |
| ELF1 | MUT    |
| ELF1 | MUTYH  |
| ELF1 | MVB12A |
| ELF1 | MVD    |
| ELF1 | MVK    |
| ELF1 | MXD3   |
| ELF1 | MYBL1  |
| ELF1 | MYBL2  |
| ELF1 | MYCBP2 |
| ELF1 | MYD88  |
| ELF1 | MYEF2  |
| ELF1 | MYH9   |
| ELF1 | MYL12A |
| ELF1 | MYL12B |

|      |           |
|------|-----------|
| ELF1 | MYL5      |
| ELF1 | MYL6      |
| ELF1 | MYL6B     |
| ELF1 | MYO1E     |
| ELF1 | MYO1G     |
| ELF1 | MYO6      |
| ELF1 | MYO9A     |
| ELF1 | MYO9B     |
| ELF1 | MYOM2     |
| ELF1 | MYP0P     |
| ELF1 | MZF1      |
| ELF1 | MZT1      |
| ELF1 | MZT2A     |
| ELF1 | N4BP1     |
| ELF1 | N4BP2L2   |
| ELF1 | N4BP3     |
| ELF1 | NAA15     |
| ELF1 | NAA30     |
| ELF1 | NAA38     |
| ELF1 | NAA40     |
| ELF1 | NAA50     |
| ELF1 | NAB2      |
| ELF1 | NABP2     |
| ELF1 | NACA      |
| ELF1 | NACC1     |
| ELF1 | NADK      |
| ELF1 | NAGK      |
| ELF1 | NAP1L1    |
| ELF1 | NAP1L4    |
| ELF1 | NAPA      |
| ELF1 | NAPG      |
| ELF1 | NARF      |
| ELF1 | NARFL     |
| ELF1 | NASP      |
| ELF1 | NAT14     |
| ELF1 | NAXD      |
| ELF1 | NBAS      |
| ELF1 | NBN       |
| ELF1 | NBPF1     |
| ELF1 | NBPF20    |
| ELF1 | NCALD     |
| ELF1 | NCAPD2    |
| ELF1 | NCAPG     |
| ELF1 | NCAPH     |
| ELF1 | NCAPH2    |
| ELF1 | NCBP2     |
| ELF1 | NCBP2-AS2 |
| ELF1 | NCBP3     |
| ELF1 | NCF1      |
| ELF1 | NCF4      |

|      |         |
|------|---------|
| ELF1 | NCK1    |
| ELF1 | NCKAP1L |
| ELF1 | NCOA1   |
| ELF1 | NCOA2   |
| ELF1 | NCOA3   |
| ELF1 | NCOA4   |
| ELF1 | NCOA5   |
| ELF1 | NCOA7   |
| ELF1 | NCOR1   |
| ELF1 | NCOR2   |
| ELF1 | NDC1    |
| ELF1 | NDC80   |
| ELF1 | NDE1    |
| ELF1 | NDEL1   |
| ELF1 | NDRG3   |
| ELF1 | NDUFA1  |
| ELF1 | NDUFA10 |
| ELF1 | NDUFA12 |
| ELF1 | NDUFA13 |
| ELF1 | NDUFA2  |
| ELF1 | NDUFA4  |
| ELF1 | NDUFA5  |
| ELF1 | NDUFA6  |
| ELF1 | NDUFA7  |
| ELF1 | NDUFA8  |
| ELF1 | NDUFAB1 |
| ELF1 | NDUFAF1 |
| ELF1 | NDUFAF3 |
| ELF1 | NDUFAF6 |
| ELF1 | NDUFB10 |
| ELF1 | NDUFB11 |
| ELF1 | NDUFB2  |
| ELF1 | NDUFB3  |
| ELF1 | NDUFB4  |
| ELF1 | NDUFB5  |
| ELF1 | NDUFB6  |
| ELF1 | NDUFB7  |
| ELF1 | NDUFB8  |
| ELF1 | NDUFB9  |
| ELF1 | NDUFC1  |
| ELF1 | NDUFS1  |
| ELF1 | NDUFS2  |
| ELF1 | NDUFS3  |
| ELF1 | NDUFS4  |
| ELF1 | NDUFS5  |
| ELF1 | NDUFS7  |
| ELF1 | NDUFS8  |
| ELF1 | NDUFV1  |
| ELF1 | NDUFV2  |
| ELF1 | NEAT1   |

|      |           |
|------|-----------|
| ELF1 | NECAP1    |
| ELF1 | NECAP2    |
| ELF1 | NEDD8     |
| ELF1 | NEDD9     |
| ELF1 | NEIL1     |
| ELF1 | NEIL3     |
| ELF1 | NEK1      |
| ELF1 | NEK2      |
| ELF1 | NEK4      |
| ELF1 | NEK6      |
| ELF1 | NEK7      |
| ELF1 | NEK8      |
| ELF1 | NELFB     |
| ELF1 | NELFCD    |
| ELF1 | NELFE     |
| ELF1 | NEMF      |
| ELF1 | NEMP2     |
| ELF1 | NET1      |
| ELF1 | NF1       |
| ELF1 | NFATC2IP  |
| ELF1 | NFATC3    |
| ELF1 | NFE2L2    |
| ELF1 | NFKBIL1   |
| ELF1 | NFYA      |
| ELF1 | NFYB      |
| ELF1 | NFYC      |
| ELF1 | NGDN      |
| ELF1 | NHLRC2    |
| ELF1 | NHLRC3    |
| ELF1 | NHP2      |
| ELF1 | NIF3L1    |
| ELF1 | NIN       |
| ELF1 | NINJ2     |
| ELF1 | NIPA1     |
| ELF1 | NIPAL2    |
| ELF1 | NIPBL     |
| ELF1 | NIPSNAP3A |
| ELF1 | NISCH     |
| ELF1 | NIT1      |
| ELF1 | NKAP      |
| ELF1 | NKIRAS2   |
| ELF1 | NKTR      |
| ELF1 | NLK       |
| ELF1 | NLRC3     |
| ELF1 | NME6      |
| ELF1 | NME7      |
| ELF1 | NMI       |
| ELF1 | NMNAT1    |
| ELF1 | NMRAL1    |
| ELF1 | NMT1      |

|      |           |
|------|-----------|
| ELF1 | NNT       |
| ELF1 | NNT-AS1   |
| ELF1 | NOA1      |
| ELF1 | NOB1      |
| ELF1 | NOL12     |
| ELF1 | NOL8      |
| ELF1 | NOL9      |
| ELF1 | NOM01     |
| ELF1 | NONO      |
| ELF1 | NOP10     |
| ELF1 | NOP14-AS1 |
| ELF1 | NORAD     |
| ELF1 | NOSIP     |
| ELF1 | NPAS1     |
| ELF1 | NPAT      |
| ELF1 | NPEPPS    |
| ELF1 | NPM1      |
| ELF1 | NPRL2     |
| ELF1 | NR1H2     |
| ELF1 | NR2C1     |
| ELF1 | NR2C2     |
| ELF1 | NR3C1     |
| ELF1 | NR4A3     |
| ELF1 | NRAS      |
| ELF1 | NRBF2     |
| ELF1 | NRBP1     |
| ELF1 | NRDC      |
| ELF1 | NRDE2     |
| ELF1 | NRF1      |
| ELF1 | NRM       |
| ELF1 | NSD1      |
| ELF1 | NSL1      |
| ELF1 | NSMCE1    |
| ELF1 | NSMCE2    |
| ELF1 | NSMCE3    |
| ELF1 | NSMCE4A   |
| ELF1 | NSRP1     |
| ELF1 | NSUN4     |
| ELF1 | NSUN5     |
| ELF1 | NT5C      |
| ELF1 | NT5C2     |
| ELF1 | NT5C3B    |
| ELF1 | NTAN1     |
| ELF1 | NTPCR     |
| ELF1 | NUB1      |
| ELF1 | NUBP1     |
| ELF1 | NUBP2     |
| ELF1 | NUBPL     |
| ELF1 | NUCKS1    |
| ELF1 | NUDCD1    |

|      |            |
|------|------------|
| ELF1 | NUDCD2     |
| ELF1 | NUDT1      |
| ELF1 | NUDT15     |
| ELF1 | NUDT16     |
| ELF1 | NUDT16L1   |
| ELF1 | NUDT18     |
| ELF1 | NUDT21     |
| ELF1 | NUDT22     |
| ELF1 | NUDT5      |
| ELF1 | NUDT6      |
| ELF1 | NUDT7      |
| ELF1 | NUF2       |
| ELF1 | NUGGC      |
| ELF1 | NUMA1      |
| ELF1 | NUMB       |
| ELF1 | NUP107     |
| ELF1 | NUP153     |
| ELF1 | NUP205     |
| ELF1 | NUP210     |
| ELF1 | NUP214     |
| ELF1 | NUP37      |
| ELF1 | NUP50      |
| ELF1 | NUP54      |
| ELF1 | NUP58      |
| ELF1 | NUP62      |
| ELF1 | NUP88      |
| ELF1 | NUP98      |
| ELF1 | NUSAP1     |
| ELF1 | NUTF2      |
| ELF1 | NUTM2B-AS1 |
| ELF1 | NXF1       |
| ELF1 | NXT2       |
| ELF1 | OARD1      |
| ELF1 | OAT        |
| ELF1 | OAZ1       |
| ELF1 | OAZ2       |
| ELF1 | OCIAD1     |
| ELF1 | OCIAD2     |
| ELF1 | ODF2       |
| ELF1 | ODF2L      |
| ELF1 | OFD1       |
| ELF1 | OGFOD1     |
| ELF1 | OGFR       |
| ELF1 | OGFRL1     |
| ELF1 | OGG1       |
| ELF1 | OLA1       |
| ELF1 | OPA3       |
| ELF1 | OPTN       |
| ELF1 | ORAI2      |
| ELF1 | ORAI3      |



|      |             |
|------|-------------|
| ELF1 | ORC1        |
| ELF1 | ORC2        |
| ELF1 | ORC3        |
| ELF1 | ORC4        |
| ELF1 | ORC6        |
| ELF1 | ORMDL1      |
| ELF1 | ORMDL2      |
| ELF1 | OSBP        |
| ELF1 | OSBPL10     |
| ELF1 | OSBPL10-AS1 |
| ELF1 | OSBPL11     |
| ELF1 | OSBPL2      |
| ELF1 | OSBPL8      |
| ELF1 | OSBPL9      |
| ELF1 | OSER1       |
| ELF1 | OST4        |
| ELF1 | OSTF1       |
| ELF1 | OSTM1       |
| ELF1 | OTUB1       |
| ELF1 | OTUD1       |
| ELF1 | OTULIN      |
| ELF1 | OXA1L       |
| ELF1 | OXLD1       |
| ELF1 | OXNAD1      |
| ELF1 | OXR1        |
| ELF1 | P2RX5       |
| ELF1 | P3H1        |
| ELF1 | P4HA1       |
| ELF1 | PAAF1       |
| ELF1 | PABPC1      |
| ELF1 | PABPN1      |
| ELF1 | PACS1       |
| ELF1 | PACIN2      |
| ELF1 | PAFAH1B1    |
| ELF1 | PAFAH1B2    |
| ELF1 | PAFAH1B3    |
| ELF1 | PAG1        |
| ELF1 | PAIP1       |
| ELF1 | PAIP2       |
| ELF1 | PAK2        |
| ELF1 | PAN3        |
| ELF1 | PANK2       |
| ELF1 | PANK4       |
| ELF1 | PAPOLA      |
| ELF1 | PAPOLG      |
| ELF1 | PAPSS1      |
| ELF1 | PAQR4       |
| ELF1 | PAQR8       |
| ELF1 | PARG        |
| ELF1 | PARK7       |

|      |            |
|------|------------|
| ELF1 | PARN       |
| ELF1 | PARP1      |
| ELF1 | PARP10     |
| ELF1 | PARP11     |
| ELF1 | PARP16     |
| ELF1 | PARP2      |
| ELF1 | PARP8      |
| ELF1 | PARVG      |
| ELF1 | PATL1      |
| ELF1 | PATZ1      |
| ELF1 | PAWR       |
| ELF1 | PAX5       |
| ELF1 | PAXBP1     |
| ELF1 | PAXIP1     |
| ELF1 | PAXIP1-AS1 |
| ELF1 | PBDC1      |
| ELF1 | PBK        |
| ELF1 | PBLD       |
| ELF1 | PBRM1      |
| ELF1 | PBX3       |
| ELF1 | PCBP1      |
| ELF1 | PCBP2      |
| ELF1 | PCCB       |
| ELF1 | PCED1B     |
| ELF1 | PCF11      |
| ELF1 | PCGF3      |
| ELF1 | PCGF5      |
| ELF1 | PCID2      |
| ELF1 | PCIF1      |
| ELF1 | PCM1       |
| ELF1 | PCMT1      |
| ELF1 | PCNA       |
| ELF1 | PCNP       |
| ELF1 | PCNT       |
| ELF1 | PCNX4      |
| ELF1 | PCSK7      |
| ELF1 | PCTP       |
| ELF1 | PCY0X1L    |
| ELF1 | PCYT2      |
| ELF1 | PDAP1      |
| ELF1 | PDCD10     |
| ELF1 | PDCD2      |
| ELF1 | PDCD6      |
| ELF1 | PDCD6IP    |
| ELF1 | PDCD7      |
| ELF1 | PDCL       |
| ELF1 | PDCL3      |
| ELF1 | PDE12      |
| ELF1 | PDE4D      |
| ELF1 | PDE6D      |

|      |         |
|------|---------|
| ELF1 | PDE7A   |
| ELF1 | PDGFD   |
| ELF1 | PDHA1   |
| ELF1 | PDHB    |
| ELF1 | PDHX    |
| ELF1 | PDK2    |
| ELF1 | PDK3    |
| ELF1 | PDLIM2  |
| ELF1 | PDLIM7  |
| ELF1 | PDRG1   |
| ELF1 | PDS5A   |
| ELF1 | PDS5B   |
| ELF1 | PDXDC1  |
| ELF1 | PDZD11  |
| ELF1 | PDZD8   |
| ELF1 | PEA15   |
| ELF1 | PEF1    |
| ELF1 | PEG10   |
| ELF1 | PELI1   |
| ELF1 | PEPD    |
| ELF1 | PER2    |
| ELF1 | PET100  |
| ELF1 | PEX11B  |
| ELF1 | PEX14   |
| ELF1 | PEX16   |
| ELF1 | PEX19   |
| ELF1 | PEX2    |
| ELF1 | PEX3    |
| ELF1 | PEX5    |
| ELF1 | PEX6    |
| ELF1 | PFDN1   |
| ELF1 | PFDN2   |
| ELF1 | PFDN4   |
| ELF1 | PFDN5   |
| ELF1 | PFKL    |
| ELF1 | PFKP    |
| ELF1 | PFN1    |
| ELF1 | PFN2    |
| ELF1 | PGAM1   |
| ELF1 | PGGT1B  |
| ELF1 | PGK1    |
| ELF1 | PGLS    |
| ELF1 | PGM1    |
| ELF1 | PGM2    |
| ELF1 | PGS1    |
| ELF1 | PHACTR4 |
| ELF1 | PHAX    |
| ELF1 | PHC1    |
| ELF1 | PHC3    |
| ELF1 | PHF10   |

|      |            |
|------|------------|
| ELF1 | PHF11      |
| ELF1 | PHF14      |
| ELF1 | PHF19      |
| ELF1 | PHF20      |
| ELF1 | PHF20L1    |
| ELF1 | PHF21A     |
| ELF1 | PHF23      |
| ELF1 | PHF3       |
| ELF1 | PHF5A      |
| ELF1 | PHF6       |
| ELF1 | PHGDH      |
| ELF1 | PHIP       |
| ELF1 | PHKG2      |
| ELF1 | PHTF2      |
| ELF1 | PHYKPL     |
| ELF1 | PI4K2A     |
| ELF1 | PIAS1      |
| ELF1 | PIAS2      |
| ELF1 | PIAS4      |
| ELF1 | PICALM     |
| ELF1 | PIDD1      |
| ELF1 | PIF1       |
| ELF1 | PIGB       |
| ELF1 | PIGBOS1    |
| ELF1 | PIGC       |
| ELF1 | PIGG       |
| ELF1 | PIGL       |
| ELF1 | PIGN       |
| ELF1 | PIG0       |
| ELF1 | PIGP       |
| ELF1 | PIGQ       |
| ELF1 | PIGU       |
| ELF1 | PIH1D1     |
| ELF1 | PIK3AP1    |
| ELF1 | PIK3C3     |
| ELF1 | PIK3CA     |
| ELF1 | PIK3CD     |
| ELF1 | PIK3R1     |
| ELF1 | PILRB      |
| ELF1 | PIN1       |
| ELF1 | PIN4       |
| ELF1 | PINLYP     |
| ELF1 | PIP4K2A    |
| ELF1 | PIP4K2B    |
| ELF1 | PISD       |
| ELF1 | PITPNA-AS1 |
| ELF1 | PITPNB     |
| ELF1 | PITPNC1    |
| ELF1 | PITPNM1    |
| ELF1 | PITRM1     |

|      |         |
|------|---------|
| ELF1 | PJA2    |
| ELF1 | PKD2    |
| ELF1 | PKHD1L1 |
| ELF1 | PKM     |
| ELF1 | PKMYT1  |
| ELF1 | PKN1    |
| ELF1 | PKN2    |
| ELF1 | PKN0X1  |
| ELF1 | PLA2G6  |
| ELF1 | PLAGL2  |
| ELF1 | PLCL2   |
| ELF1 | PLEK    |
| ELF1 | PLEKHA2 |
| ELF1 | PLEKHA3 |
| ELF1 | PLEKHB2 |
| ELF1 | PLEKHF2 |
| ELF1 | PLEKHG7 |
| ELF1 | PLEKHJ1 |
| ELF1 | PLEKH01 |
| ELF1 | PLK1    |
| ELF1 | PLK4    |
| ELF1 | PLRG1   |
| ELF1 | PLSCR1  |
| ELF1 | PM20D2  |
| ELF1 | PMAIP1  |
| ELF1 | PMF1    |
| ELF1 | PML     |
| ELF1 | PMM1    |
| ELF1 | PMPCA   |
| ELF1 | PMPCB   |
| ELF1 | PMS1    |
| ELF1 | PMS2    |
| ELF1 | PMVK    |
| ELF1 | PNISR   |
| ELF1 | PNKD    |
| ELF1 | PNKP    |
| ELF1 | PNN     |
| ELF1 | PNPLA2  |
| ELF1 | PNPLA8  |
| ELF1 | PNRC1   |
| ELF1 | PNRC2   |
| ELF1 | POC1A   |
| ELF1 | POC1B   |
| ELF1 | POC5    |
| ELF1 | POGZ    |
| ELF1 | POLA1   |
| ELF1 | POLA2   |
| ELF1 | POLD1   |
| ELF1 | POLD3   |
| ELF1 | POLD4   |

|      |         |
|------|---------|
| ELF1 | POLDIP2 |
| ELF1 | POLDIP3 |
| ELF1 | POLE    |
| ELF1 | POLE2   |
| ELF1 | POLE3   |
| ELF1 | POLE4   |
| ELF1 | POLG    |
| ELF1 | POLG2   |
| ELF1 | POLH    |
| ELF1 | POLK    |
| ELF1 | POLM    |
| ELF1 | POLQ    |
| ELF1 | POLR1D  |
| ELF1 | POLR1E  |
| ELF1 | POLR2A  |
| ELF1 | POLR2B  |
| ELF1 | POLR2C  |
| ELF1 | POLR2D  |
| ELF1 | POLR2G  |
| ELF1 | POLR2I  |
| ELF1 | POLR2J  |
| ELF1 | POLR2K  |
| ELF1 | POLR2L  |
| ELF1 | POLR2M  |
| ELF1 | POLR3A  |
| ELF1 | POLR3C  |
| ELF1 | POM121  |
| ELF1 | POMP    |
| ELF1 | POP4    |
| ELF1 | POP5    |
| ELF1 | POT1    |
| ELF1 | POU2AF1 |
| ELF1 | POU2F1  |
| ELF1 | POU2F2  |
| ELF1 | POU3F1  |
| ELF1 | POU4F1  |
| ELF1 | PPA2    |
| ELF1 | PPCDC   |
| ELF1 | PPCS    |
| ELF1 | PPDPF   |
| ELF1 | PPFIA1  |
| ELF1 | PPHLN1  |
| ELF1 | PPIA    |
| ELF1 | PPID    |
| ELF1 | PPIE    |
| ELF1 | PPIG    |
| ELF1 | PPIH    |
| ELF1 | PPIL2   |
| ELF1 | PPIL3   |
| ELF1 | PPIL4   |

|      |          |
|------|----------|
| ELF1 | PPIP5K2  |
| ELF1 | PPM1A    |
| ELF1 | PPM1B    |
| ELF1 | PPM1D    |
| ELF1 | PPM1G    |
| ELF1 | PPME1    |
| ELF1 | PPP1CA   |
| ELF1 | PPP1CB   |
| ELF1 | PPP1CC   |
| ELF1 | PPP1R10  |
| ELF1 | PPP1R11  |
| ELF1 | PPP1R12A |
| ELF1 | PPP1R16A |
| ELF1 | PPP1R18  |
| ELF1 | PPP1R2   |
| ELF1 | PPP1R35  |
| ELF1 | PPP1R7   |
| ELF1 | PPP2CA   |
| ELF1 | PPP2R1A  |
| ELF1 | PPP2R1B  |
| ELF1 | PPP2R2A  |
| ELF1 | PPP2R3C  |
| ELF1 | PPP2R5A  |
| ELF1 | PPP2R5C  |
| ELF1 | PPP2R5D  |
| ELF1 | PPP2R5E  |
| ELF1 | PPP3CB   |
| ELF1 | PPP3CC   |
| ELF1 | PPP4C    |
| ELF1 | PPP4R1   |
| ELF1 | PPP4R2   |
| ELF1 | PPP4R3A  |
| ELF1 | PPP4R3B  |
| ELF1 | PPP5C    |
| ELF1 | PPP6C    |
| ELF1 | PPP6R1   |
| ELF1 | PPP6R2   |
| ELF1 | PPP6R3   |
| ELF1 | PQBP1    |
| ELF1 | PRAF2    |
| ELF1 | PRDM15   |
| ELF1 | PRDM2    |
| ELF1 | PRDM4    |
| ELF1 | PRDX1    |
| ELF1 | PRDX2    |
| ELF1 | PRDX3    |
| ELF1 | PRDX5    |
| ELF1 | PRDX6    |
| ELF1 | PRELID3B |
| ELF1 | PRIM1    |

|      |           |
|------|-----------|
| ELF1 | PRIM2     |
| ELF1 | PRKAB1    |
| ELF1 | PRKACB    |
| ELF1 | PRKAG1    |
| ELF1 | PRKAR1A   |
| ELF1 | PRKAR2A   |
| ELF1 | PRKAR2B   |
| ELF1 | PRKCA     |
| ELF1 | PRKCD     |
| ELF1 | PRKCI     |
| ELF1 | PRKD2     |
| ELF1 | PRKD3     |
| ELF1 | PRKDC     |
| ELF1 | PRKRA     |
| ELF1 | PRKRIP1   |
| ELF1 | PRKX      |
| ELF1 | PRMT2     |
| ELF1 | PRMT7     |
| ELF1 | PRMT9     |
| ELF1 | PROSER1   |
| ELF1 | PRPF18    |
| ELF1 | PRPF19    |
| ELF1 | PRPF3     |
| ELF1 | PRPF31    |
| ELF1 | PRPF38A   |
| ELF1 | PRPF38B   |
| ELF1 | PRPF40A   |
| ELF1 | PRPF4B    |
| ELF1 | PRPF6     |
| ELF1 | PRPF8     |
| ELF1 | PRPS1     |
| ELF1 | PRPS2     |
| ELF1 | PRPSAP1   |
| ELF1 | PRPSAP2   |
| ELF1 | PRR11     |
| ELF1 | PRR13     |
| ELF1 | PRR14     |
| ELF1 | PRR14L    |
| ELF1 | PRRC2A    |
| ELF1 | PRRC2B    |
| ELF1 | PRRC2C    |
| ELF1 | PSEN1     |
| ELF1 | PSENE1    |
| ELF1 | PSIP1     |
| ELF1 | PSMA1     |
| ELF1 | PSMA2     |
| ELF1 | PSMA3     |
| ELF1 | PSMA3-AS1 |
| ELF1 | PSMA4     |
| ELF1 | PSMA5     |



|      |           |
|------|-----------|
| ELF1 | PSMB1     |
| ELF1 | PSMB10    |
| ELF1 | PSMB2     |
| ELF1 | PSMB3     |
| ELF1 | PSMB4     |
| ELF1 | PSMB6     |
| ELF1 | PSMB7     |
| ELF1 | PSMB8     |
| ELF1 | PSMB9     |
| ELF1 | PSMC1     |
| ELF1 | PSMC2     |
| ELF1 | PSMC3     |
| ELF1 | PSMC3IP   |
| ELF1 | PSMC5     |
| ELF1 | PSMC6     |
| ELF1 | PSMD1     |
| ELF1 | PSMD10    |
| ELF1 | PSMD11    |
| ELF1 | PSMD12    |
| ELF1 | PSMD13    |
| ELF1 | PSMD14    |
| ELF1 | PSMD2     |
| ELF1 | PSMD4     |
| ELF1 | PSMD6     |
| ELF1 | PSMD7     |
| ELF1 | PSMD8     |
| ELF1 | PSMD9     |
| ELF1 | PSME1     |
| ELF1 | PSME3     |
| ELF1 | PSME4     |
| ELF1 | PSMF1     |
| ELF1 | PSMG1     |
| ELF1 | PSMG2     |
| ELF1 | PSMG3     |
| ELF1 | PSMG3-AS1 |
| ELF1 | PSMG4     |
| ELF1 | PSPC1     |
| ELF1 | PSRC1     |
| ELF1 | PTAFR     |
| ELF1 | PTBP1     |
| ELF1 | PTBP3     |
| ELF1 | PTDSS1    |
| ELF1 | PTEN      |
| ELF1 | PTER      |
| ELF1 | PTGES3    |
| ELF1 | PTK2      |
| ELF1 | PTK2B     |
| ELF1 | PTMA      |
| ELF1 | PTP4A1    |
| ELF1 | PTP4A2    |

|      |            |
|------|------------|
| ELF1 | PTPN1      |
| ELF1 | PTPN11     |
| ELF1 | PTPN18     |
| ELF1 | PTPN2      |
| ELF1 | PTPN22     |
| ELF1 | PTPN6      |
| ELF1 | PTPN7      |
| ELF1 | PTPRA      |
| ELF1 | PTPRC      |
| ELF1 | PTPRS      |
| ELF1 | PTRHD1     |
| ELF1 | PTS        |
| ELF1 | PTTG1      |
| ELF1 | PTTG1IP    |
| ELF1 | PUDP       |
| ELF1 | PUF60      |
| ELF1 | PUM1       |
| ELF1 | PUS10      |
| ELF1 | PUS7L      |
| ELF1 | PVT1       |
| ELF1 | PWP1       |
| ELF1 | PWWP2A     |
| ELF1 | PXK        |
| ELF1 | PXMP2      |
| ELF1 | PXN        |
| ELF1 | PYCARD     |
| ELF1 | PYCR2      |
| ELF1 | PYM1       |
| ELF1 | PYROXD1    |
| ELF1 | PYURF      |
| ELF1 | QARS       |
| ELF1 | QRICH1     |
| ELF1 | QRICH2     |
| ELF1 | QS0X2      |
| ELF1 | QTRT2      |
| ELF1 | R3HDM1     |
| ELF1 | R3HDM4     |
| ELF1 | RAB10      |
| ELF1 | RAB11A     |
| ELF1 | RAB11B     |
| ELF1 | RAB11B-AS1 |
| ELF1 | RAB11FIP1  |
| ELF1 | RAB14      |
| ELF1 | RAB18      |
| ELF1 | RAB1A      |
| ELF1 | RAB1B      |
| ELF1 | RAB21      |
| ELF1 | RAB22A     |
| ELF1 | RAB23      |
| ELF1 | RAB27A     |

|      |           |
|------|-----------|
| ELF1 | RAB28     |
| ELF1 | RAB2A     |
| ELF1 | RAB30     |
| ELF1 | RAB30-AS1 |
| ELF1 | RAB33A    |
| ELF1 | RAB35     |
| ELF1 | RAB39B    |
| ELF1 | RAB3GAP1  |
| ELF1 | RAB3GAP2  |
| ELF1 | RAB3IP    |
| ELF1 | RAB4A     |
| ELF1 | RAB5A     |
| ELF1 | RAB5B     |
| ELF1 | RAB5C     |
| ELF1 | RAB6A     |
| ELF1 | RAB7A     |
| ELF1 | RAB8A     |
| ELF1 | RAB8B     |
| ELF1 | RAB9A     |
| ELF1 | RAB9B     |
| ELF1 | RABEP1    |
| ELF1 | RABEP2    |
| ELF1 | RABGAP1   |
| ELF1 | RABGAP1L  |
| ELF1 | RABGEF1   |
| ELF1 | RABGGTA   |
| ELF1 | RABGGTB   |
| ELF1 | RABIF     |
| ELF1 | RABL3     |
| ELF1 | RABL6     |
| ELF1 | RAC1      |
| ELF1 | RAC2      |
| ELF1 | RACGAP1   |
| ELF1 | RACK1     |
| ELF1 | RAD1      |
| ELF1 | RAD17     |
| ELF1 | RAD21     |
| ELF1 | RAD23A    |
| ELF1 | RAD23B    |
| ELF1 | RAD51AP1  |
| ELF1 | RAD51C    |
| ELF1 | RAD51D    |
| ELF1 | RAD54L    |
| ELF1 | RAE1      |
| ELF1 | RAF1      |
| ELF1 | RALA      |
| ELF1 | RALBP1    |
| ELF1 | RALGPS2   |
| ELF1 | RALY      |
| ELF1 | RAMP1     |

|      |            |
|------|------------|
| ELF1 | RAN        |
| ELF1 | RANBP2     |
| ELF1 | RANBP3     |
| ELF1 | RANGAP1    |
| ELF1 | RANGRF     |
| ELF1 | RAP1A      |
| ELF1 | RAP1B      |
| ELF1 | RAP1GDS1   |
| ELF1 | RAP2A      |
| ELF1 | RAP2C-AS1  |
| ELF1 | RAPGEF1    |
| ELF1 | RAPGEF5    |
| ELF1 | RARS2      |
| ELF1 | RASA2      |
| ELF1 | RASAL3     |
| ELF1 | RASGEF1B   |
| ELF1 | RASGRP1    |
| ELF1 | RASGRP2    |
| ELF1 | RASGRP3    |
| ELF1 | RASL11A    |
| ELF1 | RASSF1     |
| ELF1 | RASSF1-AS1 |
| ELF1 | RASSF2     |
| ELF1 | RASSF3     |
| ELF1 | RASSF5     |
| ELF1 | RASSF6     |
| ELF1 | RASSF7     |
| ELF1 | RB1        |
| ELF1 | RB1CC1     |
| ELF1 | RBBP4      |
| ELF1 | RBBP5      |
| ELF1 | RBBP6      |
| ELF1 | RBBP7      |
| ELF1 | RBBP8      |
| ELF1 | RBCK1      |
| ELF1 | RBF0X2     |
| ELF1 | RBL1       |
| ELF1 | RBL2       |
| ELF1 | RBM10      |
| ELF1 | RBM14      |
| ELF1 | RBM15      |
| ELF1 | RBM15B     |
| ELF1 | RBM18      |
| ELF1 | RBM19      |
| ELF1 | RBM22      |
| ELF1 | RBM23      |
| ELF1 | RBM25      |
| ELF1 | RBM26      |
| ELF1 | RBM26-AS1  |
| ELF1 | RBM3       |

|      |        |
|------|--------|
| ELF1 | RBM38  |
| ELF1 | RBM39  |
| ELF1 | RBM4   |
| ELF1 | RBM41  |
| ELF1 | RBM42  |
| ELF1 | RBM45  |
| ELF1 | RBM48  |
| ELF1 | RBM4B  |
| ELF1 | RBM5   |
| ELF1 | RBM6   |
| ELF1 | RBM7   |
| ELF1 | RBM8A  |
| ELF1 | RBMX   |
| ELF1 | RBMX2  |
| ELF1 | RBMXL1 |
| ELF1 | RBPJ   |
| ELF1 | RBX1   |
| ELF1 | RC3H1  |
| ELF1 | RCC1   |
| ELF1 | RCC1L  |
| ELF1 | RCC2   |
| ELF1 | RCCD1  |
| ELF1 | RCHY1  |
| ELF1 | RCN1   |
| ELF1 | RCN2   |
| ELF1 | RCOR1  |
| ELF1 | RCSD1  |
| ELF1 | RDH14  |
| ELF1 | RECQL  |
| ELF1 | REEP3  |
| ELF1 | REEP4  |
| ELF1 | REEP5  |
| ELF1 | REL    |
| ELF1 | RELB   |
| ELF1 | RELL2  |
| ELF1 | RELT   |
| ELF1 | REPIN1 |
| ELF1 | RER1   |
| ELF1 | RERE   |
| ELF1 | REST   |
| ELF1 | REV1   |
| ELF1 | REV3L  |
| ELF1 | RFC1   |
| ELF1 | RFC2   |
| ELF1 | RFC3   |
| ELF1 | RFC4   |
| ELF1 | RFC5   |
| ELF1 | RFK    |
| ELF1 | RFTN1  |
| ELF1 | RFWD3  |

|      |          |
|------|----------|
| ELF1 | RFX1     |
| ELF1 | RFX5     |
| ELF1 | RFX7     |
| ELF1 | RFXANK   |
| ELF1 | RGP1     |
| ELF1 | RGS1     |
| ELF1 | RGS10    |
| ELF1 | RGS13    |
| ELF1 | RGS19    |
| ELF1 | RGS2     |
| ELF1 | RGS3     |
| ELF1 | RHBDD2   |
| ELF1 | RHBDF2   |
| ELF1 | RHEB     |
| ELF1 | RHEBL1   |
| ELF1 | RHN01    |
| ELF1 | RHOA     |
| ELF1 | RHOG     |
| ELF1 | RH0H     |
| ELF1 | RHOQ     |
| ELF1 | RHOT1    |
| ELF1 | RHOT2    |
| ELF1 | RIC8A    |
| ELF1 | RIF1     |
| ELF1 | RIMKLB   |
| ELF1 | RING1    |
| ELF1 | RINL     |
| ELF1 | RINT1    |
| ELF1 | RIOK1    |
| ELF1 | RIOK3    |
| ELF1 | RIPK1    |
| ELF1 | RIPK2    |
| ELF1 | RIT1     |
| ELF1 | RMDN1    |
| ELF1 | RMI1     |
| ELF1 | RMI2     |
| ELF1 | RMND1    |
| ELF1 | RMND5A   |
| ELF1 | RMND5B   |
| ELF1 | RNASEH1  |
| ELF1 | RNASEH2A |
| ELF1 | RNASEH2B |
| ELF1 | RNASEH2C |
| ELF1 | RND1     |
| ELF1 | RNF10    |
| ELF1 | RNF111   |
| ELF1 | RNF113A  |
| ELF1 | RNF114   |
| ELF1 | RNF115   |
| ELF1 | RNF126   |

|      |         |
|------|---------|
| ELF1 | RNF13   |
| ELF1 | RNF139  |
| ELF1 | RNF14   |
| ELF1 | RNF144B |
| ELF1 | RNF166  |
| ELF1 | RNF167  |
| ELF1 | RNF168  |
| ELF1 | RNF170  |
| ELF1 | RNF181  |
| ELF1 | RNF19A  |
| ELF1 | RNF20   |
| ELF1 | RNF212  |
| ELF1 | RNF214  |
| ELF1 | RNF219  |
| ELF1 | RNF220  |
| ELF1 | RNF25   |
| ELF1 | RNF26   |
| ELF1 | RNF34   |
| ELF1 | RNF38   |
| ELF1 | RNF4    |
| ELF1 | RNF41   |
| ELF1 | RNF44   |
| ELF1 | RNF6    |
| ELF1 | RNF7    |
| ELF1 | RNF8    |
| ELF1 | RNFT1   |
| ELF1 | RNFT2   |
| ELF1 | RNGTT   |
| ELF1 | RNMT    |
| ELF1 | RNPEPL1 |
| ELF1 | RNPS1   |
| ELF1 | ROCK1   |
| ELF1 | ROCK2   |
| ELF1 | ROM01   |
| ELF1 | RP2     |
| ELF1 | RPA2    |
| ELF1 | RPA3    |
| ELF1 | RPAP2   |
| ELF1 | RPAP3   |
| ELF1 | RPF1    |
| ELF1 | RPIA    |
| ELF1 | RPL10   |
| ELF1 | RPL10A  |
| ELF1 | RPL11   |
| ELF1 | RPL12   |
| ELF1 | RPL13   |
| ELF1 | RPL13A  |
| ELF1 | RPL14   |
| ELF1 | RPL15   |
| ELF1 | RPL17   |

|      |         |
|------|---------|
| ELF1 | RPL18   |
| ELF1 | RPL18A  |
| ELF1 | RPL19   |
| ELF1 | RPL21   |
| ELF1 | RPL22   |
| ELF1 | RPL23   |
| ELF1 | RPL23A  |
| ELF1 | RPL24   |
| ELF1 | RPL26   |
| ELF1 | RPL27   |
| ELF1 | RPL27A  |
| ELF1 | RPL28   |
| ELF1 | RPL29   |
| ELF1 | RPL3    |
| ELF1 | RPL30   |
| ELF1 | RPL31   |
| ELF1 | RPL32   |
| ELF1 | RPL34   |
| ELF1 | RPL35   |
| ELF1 | RPL35A  |
| ELF1 | RPL36   |
| ELF1 | RPL36A  |
| ELF1 | RPL36AL |
| ELF1 | RPL37   |
| ELF1 | RPL37A  |
| ELF1 | RPL38   |
| ELF1 | RPL39   |
| ELF1 | RPL39L  |
| ELF1 | RPL4    |
| ELF1 | RPL41   |
| ELF1 | RPL5    |
| ELF1 | RPL6    |
| ELF1 | RPL7    |
| ELF1 | RPL7L1  |
| ELF1 | RPL8    |
| ELF1 | RPL9    |
| ELF1 | RPLP0   |
| ELF1 | RPLP1   |
| ELF1 | RPLP2   |
| ELF1 | RPP14   |
| ELF1 | RPP25L  |
| ELF1 | RPP30   |
| ELF1 | RPP38   |
| ELF1 | RPRD1A  |
| ELF1 | RPRD1B  |
| ELF1 | RPRD2   |
| ELF1 | RPS10   |
| ELF1 | RPS11   |
| ELF1 | RPS13   |
| ELF1 | RPS14   |



|      |          |
|------|----------|
| ELF1 | RPS15    |
| ELF1 | RPS15A   |
| ELF1 | RPS16    |
| ELF1 | RPS17    |
| ELF1 | RPS18    |
| ELF1 | RPS19    |
| ELF1 | RPS19BP1 |
| ELF1 | RPS2     |
| ELF1 | RPS20    |
| ELF1 | RPS23    |
| ELF1 | RPS24    |
| ELF1 | RPS25    |
| ELF1 | RPS27    |
| ELF1 | RPS27A   |
| ELF1 | RPS27L   |
| ELF1 | RPS29    |
| ELF1 | RPS3     |
| ELF1 | RPS3A    |
| ELF1 | RPS4X    |
| ELF1 | RPS4Y1   |
| ELF1 | RPS5     |
| ELF1 | RPS6     |
| ELF1 | RPS6KA1  |
| ELF1 | RPS6KA4  |
| ELF1 | RPS6KA5  |
| ELF1 | RPS6KB2  |
| ELF1 | RPS6KC1  |
| ELF1 | RPS7     |
| ELF1 | RPS8     |
| ELF1 | RPS9     |
| ELF1 | RPSA     |
| ELF1 | RPUSD2   |
| ELF1 | RPUSD3   |
| ELF1 | RRAGA    |
| ELF1 | RRAGB    |
| ELF1 | RRAGC    |
| ELF1 | RRAS2    |
| ELF1 | RRM1     |
| ELF1 | RRM2     |
| ELF1 | RRM2B    |
| ELF1 | RRNAD1   |
| ELF1 | RRP36    |
| ELF1 | RRP7A    |
| ELF1 | RRP8     |
| ELF1 | RSBN1    |
| ELF1 | RSBN1L   |
| ELF1 | RSF1     |
| ELF1 | RSL24D1  |
| ELF1 | RSPRY1   |
| ELF1 | RSRC1    |

|      |         |
|------|---------|
| ELF1 | RSRC2   |
| ELF1 | RSRP1   |
| ELF1 | RSU1    |
| ELF1 | RTCA    |
| ELF1 | RTCB    |
| ELF1 | RTF1    |
| ELF1 | RTKN2   |
| ELF1 | RTN2    |
| ELF1 | RTN3    |
| ELF1 | RTN4    |
| ELF1 | RTN4IP1 |
| ELF1 | RUBCN   |
| ELF1 | RUFY1   |
| ELF1 | RUFY3   |
| ELF1 | RUNDC1  |
| ELF1 | RUSC1   |
| ELF1 | RUVBL1  |
| ELF1 | RUVBL2  |
| ELF1 | RWDD4   |
| ELF1 | RYK     |
| ELF1 | S100A10 |
| ELF1 | S100PBP |
| ELF1 | S1PR2   |
| ELF1 | S1PR4   |
| ELF1 | SAAL1   |
| ELF1 | SAC3D1  |
| ELF1 | SACM1L  |
| ELF1 | SAE1    |
| ELF1 | SAFB    |
| ELF1 | SAFB2   |
| ELF1 | SAMD10  |
| ELF1 | SAMM50  |
| ELF1 | SAMSN1  |
| ELF1 | SAP130  |
| ELF1 | SAP18   |
| ELF1 | SAP30   |
| ELF1 | SAP30BP |
| ELF1 | SAR1A   |
| ELF1 | SARS    |
| ELF1 | SARS2   |
| ELF1 | SART1   |
| ELF1 | SART3   |
| ELF1 | SASH3   |
| ELF1 | SASS6   |
| ELF1 | SAV1    |
| ELF1 | SBF1    |
| ELF1 | SBF2    |
| ELF1 | SC5D    |
| ELF1 | SCAF1   |
| ELF1 | SCAF11  |

|      |           |
|------|-----------|
| ELF1 | SCAF4     |
| ELF1 | SCAI      |
| ELF1 | SCAMP2    |
| ELF1 | SCAND1    |
| ELF1 | SCARB1    |
| ELF1 | SCFD1     |
| ELF1 | SCIMP     |
| ELF1 | SCLT1     |
| ELF1 | SCLY      |
| ELF1 | SCMH1     |
| ELF1 | SCNM1     |
| ELF1 | SC01      |
| ELF1 | SC0C      |
| ELF1 | SC0C-AS1  |
| ELF1 | SCPEP1    |
| ELF1 | SCRN1     |
| ELF1 | SDCBP     |
| ELF1 | SDCCAG8   |
| ELF1 | SDE2      |
| ELF1 | SDF2      |
| ELF1 | SDHA      |
| ELF1 | SDHAF1    |
| ELF1 | SDHAF2    |
| ELF1 | SDHAF3    |
| ELF1 | SDHB      |
| ELF1 | SDHC      |
| ELF1 | SDHD      |
| ELF1 | SDR16C5   |
| ELF1 | SDR39U1   |
| ELF1 | SEC11A    |
| ELF1 | SEC13     |
| ELF1 | SEC14L1   |
| ELF1 | SEC22A    |
| ELF1 | SEC22B    |
| ELF1 | SEC22C    |
| ELF1 | SEC23A    |
| ELF1 | SEC24C    |
| ELF1 | SEC61G    |
| ELF1 | SEC62     |
| ELF1 | SEC63     |
| ELF1 | SECISBP2  |
| ELF1 | SECISBP2L |
| ELF1 | SEL1L3    |
| ELF1 | SEMA4A    |
| ELF1 | SENP1     |
| ELF1 | SENP2     |
| ELF1 | SENP5     |
| ELF1 | SENP6     |
| ELF1 | SEPHS1    |
| ELF1 | SEPHS2    |

|      |          |
|------|----------|
| ELF1 | SEPSECS  |
| ELF1 | SEPT11   |
| ELF1 | SEPT2    |
| ELF1 | SEPT6    |
| ELF1 | SEPT7    |
| ELF1 | SEPT9    |
| ELF1 | SERBP1   |
| ELF1 | SERF2    |
| ELF1 | SERINC3  |
| ELF1 | SERP2    |
| ELF1 | SERPINB1 |
| ELF1 | SERTAD2  |
| ELF1 | SESTD1   |
| ELF1 | SET      |
| ELF1 | SETD2    |
| ELF1 | SETD5    |
| ELF1 | SETD9    |
| ELF1 | SETDB2   |
| ELF1 | SETMAR   |
| ELF1 | SETX     |
| ELF1 | SF1      |
| ELF1 | SF3A1    |
| ELF1 | SF3A2    |
| ELF1 | SF3A3    |
| ELF1 | SF3B1    |
| ELF1 | SF3B2    |
| ELF1 | SF3B4    |
| ELF1 | SF3B5    |
| ELF1 | SF3B6    |
| ELF1 | SFI1     |
| ELF1 | SFMBT1   |
| ELF1 | SFPQ     |
| ELF1 | SFSWAP   |
| ELF1 | SFT2D1   |
| ELF1 | SFT2D2   |
| ELF1 | SFT2D3   |
| ELF1 | SFXN1    |
| ELF1 | SGK3     |
| ELF1 | SGMS1    |
| ELF1 | SG01     |
| ELF1 | SG02     |
| ELF1 | SGPP1    |
| ELF1 | SGSM3    |
| ELF1 | SH2B2    |
| ELF1 | SH2D3C   |
| ELF1 | SH3BGRL  |
| ELF1 | SH3BP1   |
| ELF1 | SH3BP5   |
| ELF1 | SH3BP5L  |
| ELF1 | SH3GLB1  |

|      |          |
|------|----------|
| ELF1 | SH3GLB2  |
| ELF1 | SH3KBP1  |
| ELF1 | SHANK2   |
| ELF1 | SHARPIN  |
| ELF1 | SHC1     |
| ELF1 | SHCBP1   |
| ELF1 | SHISA5   |
| ELF1 | SHISA8   |
| ELF1 | SHKBP1   |
| ELF1 | SHMT2    |
| ELF1 | SHOC2    |
| ELF1 | SHQ1     |
| ELF1 | SIAH1    |
| ELF1 | SIAH2    |
| ELF1 | SIGIRR   |
| ELF1 | SIK2     |
| ELF1 | SIKE1    |
| ELF1 | SIPA1    |
| ELF1 | SIPA1L1  |
| ELF1 | SIPA1L3  |
| ELF1 | SIRT1    |
| ELF1 | SIRT2    |
| ELF1 | SIRT5    |
| ELF1 | SIRT6    |
| ELF1 | SIRT7    |
| ELF1 | SKA2     |
| ELF1 | SKA3     |
| ELF1 | SKAP2    |
| ELF1 | SKIL     |
| ELF1 | SKP1     |
| ELF1 | SLAIN1   |
| ELF1 | SLAIN2   |
| ELF1 | SLAMF6   |
| ELF1 | SLBP     |
| ELF1 | SLC10A3  |
| ELF1 | SLC12A2  |
| ELF1 | SLC15A4  |
| ELF1 | SLC16A1  |
| ELF1 | SLC16A4  |
| ELF1 | SLC16A7  |
| ELF1 | SLC1A4   |
| ELF1 | SLC20A1  |
| ELF1 | SLC25A1  |
| ELF1 | SLC25A11 |
| ELF1 | SLC25A12 |
| ELF1 | SLC25A13 |
| ELF1 | SLC25A17 |
| ELF1 | SLC25A19 |
| ELF1 | SLC25A20 |
| ELF1 | SLC25A25 |

|      |          |
|------|----------|
| ELF1 | SLC25A26 |
| ELF1 | SLC25A3  |
| ELF1 | SLC25A36 |
| ELF1 | SLC25A37 |
| ELF1 | SLC25A38 |
| ELF1 | SLC25A40 |
| ELF1 | SLC25A45 |
| ELF1 | SLC25A5  |
| ELF1 | SLC27A3  |
| ELF1 | SLC2A6   |
| ELF1 | SLC30A4  |
| ELF1 | SLC30A5  |
| ELF1 | SLC35A1  |
| ELF1 | SLC35A4  |
| ELF1 | SLC35A5  |
| ELF1 | SLC35B2  |
| ELF1 | SLC35B3  |
| ELF1 | SLC35C1  |
| ELF1 | SLC35C2  |
| ELF1 | SLC35E3  |
| ELF1 | SLC35F5  |
| ELF1 | SLC35F6  |
| ELF1 | SLC35G1  |
| ELF1 | SLC36A4  |
| ELF1 | SLC37A1  |
| ELF1 | SLC38A1  |
| ELF1 | SLC38A2  |
| ELF1 | SLC38A5  |
| ELF1 | SLC38A9  |
| ELF1 | SLC39A1  |
| ELF1 | SLC39A3  |
| ELF1 | SLC41A1  |
| ELF1 | SLC41A3  |
| ELF1 | SLC43A2  |
| ELF1 | SLC44A2  |
| ELF1 | SLC46A3  |
| ELF1 | SLC48A1  |
| ELF1 | SLC4A1AP |
| ELF1 | SLC4A8   |
| ELF1 | SLC5A3   |
| ELF1 | SLC9A3R1 |
| ELF1 | SLC9A7   |
| ELF1 | SLC9A8   |
| ELF1 | SLC9B2   |
| ELF1 | SLC03A1  |
| ELF1 | SLF1     |
| ELF1 | SLF2     |
| ELF1 | SLK      |
| ELF1 | SLMAP    |
| ELF1 | SLTM     |

|      |          |
|------|----------|
| ELF1 | SLU7     |
| ELF1 | SLX4     |
| ELF1 | SLX4IP   |
| ELF1 | SMAD2    |
| ELF1 | SMAD4    |
| ELF1 | SMAD5    |
| ELF1 | SMAP1    |
| ELF1 | SMAP2    |
| ELF1 | SMARCA2  |
| ELF1 | SMARCA4  |
| ELF1 | SMARCA5  |
| ELF1 | SMARCA1  |
| ELF1 | SMARCA1  |
| ELF1 | SMARCB1  |
| ELF1 | SMARCC1  |
| ELF1 | SMARCC2  |
| ELF1 | SMARCD1  |
| ELF1 | SMARCD2  |
| ELF1 | SMARCE1  |
| ELF1 | SMC1A    |
| ELF1 | SMC2     |
| ELF1 | SMC3     |
| ELF1 | SMC4     |
| ELF1 | SMC5     |
| ELF1 | SMCHD1   |
| ELF1 | SMC04    |
| ELF1 | SMCR5    |
| ELF1 | SMG1     |
| ELF1 | SMG6     |
| ELF1 | SMG7     |
| ELF1 | SMG9     |
| ELF1 | SMIM10L1 |
| ELF1 | SMIM12   |
| ELF1 | SMIM14   |
| ELF1 | SMIM15   |
| ELF1 | SMIM19   |
| ELF1 | SMIM20   |
| ELF1 | SMIM7    |
| ELF1 | SMN1     |
| ELF1 | SMPD1    |
| ELF1 | SMPD4    |
| ELF1 | SMS      |
| ELF1 | SMTN     |
| ELF1 | SMU1     |
| ELF1 | SMUG1    |
| ELF1 | SMURF1   |
| ELF1 | SNAP23   |
| ELF1 | SNAP29   |
| ELF1 | SNAPC1   |
| ELF1 | SNAPC3   |

|      |          |
|------|----------|
| ELF1 | SNAPC5   |
| ELF1 | SNAPIN   |
| ELF1 | SNF8     |
| ELF1 | SNHG21   |
| ELF1 | SNHG25   |
| ELF1 | SNHG8    |
| ELF1 | SNHG9    |
| ELF1 | SNRNP200 |
| ELF1 | SNRNP25  |
| ELF1 | SNRNP27  |
| ELF1 | SNRNP35  |
| ELF1 | SNRNP40  |
| ELF1 | SNRNP48  |
| ELF1 | SNRNP70  |
| ELF1 | SNRPA1   |
| ELF1 | SNRPB    |
| ELF1 | SNRPB2   |
| ELF1 | SNRPC    |
| ELF1 | SNRPD1   |
| ELF1 | SNRPD2   |
| ELF1 | SNRPF    |
| ELF1 | SNRPG    |
| ELF1 | SNRPN    |
| ELF1 | SNTA1    |
| ELF1 | SNTB1    |
| ELF1 | SNTB2    |
| ELF1 | SNU13    |
| ELF1 | SNW1     |
| ELF1 | SNX1     |
| ELF1 | SNX10    |
| ELF1 | SNX13    |
| ELF1 | SNX14    |
| ELF1 | SNX15    |
| ELF1 | SNX17    |
| ELF1 | SNX2     |
| ELF1 | SNX20    |
| ELF1 | SNX22    |
| ELF1 | SNX25    |
| ELF1 | SNX29    |
| ELF1 | SNX3     |
| ELF1 | SNX5     |
| ELF1 | SNX6     |
| ELF1 | SNX8     |
| ELF1 | SNX9     |
| ELF1 | S0AT1    |
| ELF1 | S0BP     |
| ELF1 | S0CS1    |
| ELF1 | S0D1     |
| ELF1 | S0N      |
| ELF1 | S0S1     |



|      |          |
|------|----------|
| ELF1 | S0X4     |
| ELF1 | SP100    |
| ELF1 | SP110    |
| ELF1 | SP140L   |
| ELF1 | SP2      |
| ELF1 | SP3      |
| ELF1 | SPA17    |
| ELF1 | SPAG5    |
| ELF1 | SPAG7    |
| ELF1 | SPAG9    |
| ELF1 | SPAST    |
| ELF1 | SPATA24  |
| ELF1 | SPATA33  |
| ELF1 | SPATS2   |
| ELF1 | SPC24    |
| ELF1 | SPC25    |
| ELF1 | SPDL1    |
| ELF1 | SPEN     |
| ELF1 | SPG11    |
| ELF1 | SPG21    |
| ELF1 | SPG7     |
| ELF1 | SPHK2    |
| ELF1 | SPI1     |
| ELF1 | SPICE1   |
| ELF1 | SPIDR    |
| ELF1 | SPIN2B   |
| ELF1 | SPINK2   |
| ELF1 | SPINT1   |
| ELF1 | SPINT2   |
| ELF1 | SPNS1    |
| ELF1 | SPON1    |
| ELF1 | SPOP     |
| ELF1 | SPOPL    |
| ELF1 | SPPL2A   |
| ELF1 | SPRED2   |
| ELF1 | SPRTN    |
| ELF1 | SPSB3    |
| ELF1 | SPTAN1   |
| ELF1 | SPTBN1   |
| ELF1 | SPTLC1   |
| ELF1 | SPTLC2   |
| ELF1 | SPTSSA   |
| ELF1 | SQLE     |
| ELF1 | SREBF2   |
| ELF1 | SREK1    |
| ELF1 | SREK1IP1 |
| ELF1 | SRGAP2B  |
| ELF1 | SRP14    |
| ELF1 | SRP19    |
| ELF1 | SRP54    |

|      |          |
|------|----------|
| ELF1 | SRP72    |
| ELF1 | SRP9     |
| ELF1 | SRPK1    |
| ELF1 | SRPK2    |
| ELF1 | SRRM1    |
| ELF1 | SRRM2    |
| ELF1 | SRRT     |
| ELF1 | SRSF1    |
| ELF1 | SRSF10   |
| ELF1 | SRSF3    |
| ELF1 | SRSF4    |
| ELF1 | SRSF5    |
| ELF1 | SRSF6    |
| ELF1 | SRSF7    |
| ELF1 | SRSF8    |
| ELF1 | SRSF9    |
| ELF1 | SS18     |
| ELF1 | SS18L2   |
| ELF1 | SSB      |
| ELF1 | SSBP1    |
| ELF1 | SSBP2    |
| ELF1 | SSBP3    |
| ELF1 | SSBP4    |
| ELF1 | SSH2     |
| ELF1 | SSNA1    |
| ELF1 | SSU72    |
| ELF1 | ST13     |
| ELF1 | ST14     |
| ELF1 | ST20     |
| ELF1 | ST3GAL2  |
| ELF1 | ST3GAL5  |
| ELF1 | ST6GAL1  |
| ELF1 | STAG1    |
| ELF1 | STAG2    |
| ELF1 | STAG3    |
| ELF1 | STAM2    |
| ELF1 | STAMP    |
| ELF1 | STAP1    |
| ELF1 | STARD3   |
| ELF1 | STARD3NL |
| ELF1 | STARD4   |
| ELF1 | STARD7   |
| ELF1 | STAT2    |
| ELF1 | STAT3    |
| ELF1 | STAT5B   |
| ELF1 | STAU1    |
| ELF1 | STAU2    |
| ELF1 | STIL     |
| ELF1 | STIM2    |
| ELF1 | STIP1    |

|      |         |
|------|---------|
| ELF1 | STK10   |
| ELF1 | STK11IP |
| ELF1 | STK16   |
| ELF1 | STK17B  |
| ELF1 | STK24   |
| ELF1 | STK25   |
| ELF1 | STK26   |
| ELF1 | STK38   |
| ELF1 | STK38L  |
| ELF1 | STK39   |
| ELF1 | STK4    |
| ELF1 | STK40   |
| ELF1 | STMN1   |
| ELF1 | STOX1   |
| ELF1 | STPG1   |
| ELF1 | STRADA  |
| ELF1 | STRAP   |
| ELF1 | STRBP   |
| ELF1 | STRN    |
| ELF1 | STRN3   |
| ELF1 | STT3B   |
| ELF1 | STUB1   |
| ELF1 | STX10   |
| ELF1 | STX11   |
| ELF1 | STX12   |
| ELF1 | STX16   |
| ELF1 | STX17   |
| ELF1 | STX18   |
| ELF1 | STX2    |
| ELF1 | STX4    |
| ELF1 | STX5    |
| ELF1 | STX7    |
| ELF1 | STX8    |
| ELF1 | STXBP2  |
| ELF1 | STXBP3  |
| ELF1 | STXBP6  |
| ELF1 | STYX    |
| ELF1 | STYXL1  |
| ELF1 | SUCLA2  |
| ELF1 | SUCLG1  |
| ELF1 | SUCLG2  |
| ELF1 | SUDS3   |
| ELF1 | SUFU    |
| ELF1 | SUGCT   |
| ELF1 | SUGP1   |
| ELF1 | SUGP2   |
| ELF1 | SUGT1   |
| ELF1 | SULF2   |
| ELF1 | SUM01   |
| ELF1 | SUM02   |

|      |         |
|------|---------|
| ELF1 | SUM03   |
| ELF1 | SUN2    |
| ELF1 | SUPT16H |
| ELF1 | SUPT20H |
| ELF1 | SUPT4H1 |
| ELF1 | SUPT5H  |
| ELF1 | SUPV3L1 |
| ELF1 | SURF1   |
| ELF1 | SUSD3   |
| ELF1 | SUSD6   |
| ELF1 | SUV39H1 |
| ELF1 | SUV39H2 |
| ELF1 | SUZ12   |
| ELF1 | SVBP    |
| ELF1 | SWAP70  |
| ELF1 | SWI5    |
| ELF1 | SWSAP1  |
| ELF1 | SYAP1   |
| ELF1 | SYBU    |
| ELF1 | SYF2    |
| ELF1 | SYK     |
| ELF1 | SYMPK   |
| ELF1 | SYNC    |
| ELF1 | SYNCRIP |
| ELF1 | SYNE1   |
| ELF1 | SYNE2   |
| ELF1 | SYNJ2BP |
| ELF1 | SYNRG   |
| ELF1 | SYPL1   |
| ELF1 | SYT17   |
| ELF1 | SYTL2   |
| ELF1 | SZRD1   |
| ELF1 | TAB2    |
| ELF1 | TACC1   |
| ELF1 | TACC3   |
| ELF1 | TADA3   |
| ELF1 | TAF1    |
| ELF1 | TAF10   |
| ELF1 | TAF11   |
| ELF1 | TAF12   |
| ELF1 | TAF15   |
| ELF1 | TAF1B   |
| ELF1 | TAF1D   |
| ELF1 | TAF2    |
| ELF1 | TAF5    |
| ELF1 | TAF6    |
| ELF1 | TAF7    |
| ELF1 | TAF8    |
| ELF1 | TAF9    |
| ELF1 | TAGAP   |

|      |          |
|------|----------|
| ELF1 | TALD01   |
| ELF1 | TANG02   |
| ELF1 | TANK     |
| ELF1 | TAOK1    |
| ELF1 | TAOK3    |
| ELF1 | TAP2     |
| ELF1 | TAPT1    |
| ELF1 | TARDBP   |
| ELF1 | TARS2    |
| ELF1 | TATDN1   |
| ELF1 | TATDN3   |
| ELF1 | TAX1BP1  |
| ELF1 | TAX1BP3  |
| ELF1 | TAZ      |
| ELF1 | TBC1D1   |
| ELF1 | TBC1D10A |
| ELF1 | TBC1D10C |
| ELF1 | TBC1D15  |
| ELF1 | TBC1D17  |
| ELF1 | TBC1D20  |
| ELF1 | TBC1D22A |
| ELF1 | TBC1D23  |
| ELF1 | TBC1D25  |
| ELF1 | TBC1D4   |
| ELF1 | TBC1D5   |
| ELF1 | TBC1D9B  |
| ELF1 | TBCA     |
| ELF1 | TBCB     |
| ELF1 | TBCC     |
| ELF1 | TBCCD1   |
| ELF1 | TBCK     |
| ELF1 | TBK1     |
| ELF1 | TBL1X    |
| ELF1 | TBL1XR1  |
| ELF1 | TBP      |
| ELF1 | TBPL1    |
| ELF1 | TBRG1    |
| ELF1 | TCAIM    |
| ELF1 | TCEA1    |
| ELF1 | TCEA2    |
| ELF1 | TCEAL3   |
| ELF1 | TCEAL4   |
| ELF1 | TCEAL8   |
| ELF1 | TCEAL9   |
| ELF1 | TCERG1   |
| ELF1 | TCF12    |
| ELF1 | TCF19    |
| ELF1 | TCF25    |
| ELF1 | TCF3     |
| ELF1 | TCF4     |

|      |          |
|------|----------|
| ELF1 | TCHP     |
| ELF1 | TCL1A    |
| ELF1 | TCL1B    |
| ELF1 | TCOF1    |
| ELF1 | TCTA     |
| ELF1 | TCTE3    |
| ELF1 | TCTEX1D2 |
| ELF1 | TDG      |
| ELF1 | TDP1     |
| ELF1 | TDP2     |
| ELF1 | TDRD3    |
| ELF1 | TDRKH    |
| ELF1 | TEC      |
| ELF1 | TEFM     |
| ELF1 | TEL02    |
| ELF1 | TERF1    |
| ELF1 | TERF2    |
| ELF1 | TERF2IP  |
| ELF1 | TESC     |
| ELF1 | TESPA1   |
| ELF1 | TET2     |
| ELF1 | TEX10    |
| ELF1 | TEX264   |
| ELF1 | TEX30    |
| ELF1 | TFB1M    |
| ELF1 | TFDP2    |
| ELF1 | TFEB     |
| ELF1 | TFIP11   |
| ELF1 | TFPT     |
| ELF1 | TFRC     |
| ELF1 | TGFBR1   |
| ELF1 | TGIF2    |
| ELF1 | TGM2     |
| ELF1 | TGOLN2   |
| ELF1 | THAP1    |
| ELF1 | THAP11   |
| ELF1 | THAP12   |
| ELF1 | THAP2    |
| ELF1 | THAP3    |
| ELF1 | THAP4    |
| ELF1 | THAP7    |
| ELF1 | THAP9    |
| ELF1 | THG1L    |
| ELF1 | THOC1    |
| ELF1 | THOC2    |
| ELF1 | THOC3    |
| ELF1 | THOC5    |
| ELF1 | THOC6    |
| ELF1 | THOC7    |
| ELF1 | THOP1    |

|      |          |
|------|----------|
| ELF1 | THRAP3   |
| ELF1 | THUMPD1  |
| ELF1 | TIA1     |
| ELF1 | TIAL1    |
| ELF1 | TIAM2    |
| ELF1 | TIFA     |
| ELF1 | TIGAR    |
| ELF1 | TIMELESS |
| ELF1 | TIMM10   |
| ELF1 | TIMM10B  |
| ELF1 | TIMM17B  |
| ELF1 | TIMM21   |
| ELF1 | TIMM23   |
| ELF1 | TIMM8B   |
| ELF1 | TIMMDC1  |
| ELF1 | TINF2    |
| ELF1 | TIPARP   |
| ELF1 | TIPIN    |
| ELF1 | TIPRL    |
| ELF1 | TKT      |
| ELF1 | TLDC1    |
| ELF1 | TLE4     |
| ELF1 | TLK1     |
| ELF1 | TLK2     |
| ELF1 | TLN1     |
| ELF1 | TLR1     |
| ELF1 | TLR10    |
| ELF1 | TM2D1    |
| ELF1 | TM7SF3   |
| ELF1 | TM9SF2   |
| ELF1 | TM9SF3   |
| ELF1 | TMA16    |
| ELF1 | TMA7     |
| ELF1 | TMBIM4   |
| ELF1 | TMBIM6   |
| ELF1 | TMC6     |
| ELF1 | TMC8     |
| ELF1 | TMC01    |
| ELF1 | TMC04    |
| ELF1 | TMED8    |
| ELF1 | TMEM106B |
| ELF1 | TMEM106C |
| ELF1 | TMEM107  |
| ELF1 | TMEM11   |
| ELF1 | TMEM123  |
| ELF1 | TMEM126B |
| ELF1 | TMEM128  |
| ELF1 | TMEM131  |
| ELF1 | TMEM138  |
| ELF1 | TMEM14A  |

|      |          |
|------|----------|
| ELF1 | TMEM14B  |
| ELF1 | TMEM14C  |
| ELF1 | TMEM154  |
| ELF1 | TMEM156  |
| ELF1 | TMEM160  |
| ELF1 | TMEM161A |
| ELF1 | TMEM165  |
| ELF1 | TMEM167A |
| ELF1 | TMEM170A |
| ELF1 | TMEM18   |
| ELF1 | TMEM183A |
| ELF1 | TMEM19   |
| ELF1 | TMEM199  |
| ELF1 | TMEM206  |
| ELF1 | TMEM218  |
| ELF1 | TMEM219  |
| ELF1 | TMEM222  |
| ELF1 | TMEM223  |
| ELF1 | TMEM230  |
| ELF1 | TMEM234  |
| ELF1 | TMEM242  |
| ELF1 | TMEM243  |
| ELF1 | TMEM245  |
| ELF1 | TMEM248  |
| ELF1 | TMEM256  |
| ELF1 | TMEM258  |
| ELF1 | TMEM259  |
| ELF1 | TMEM263  |
| ELF1 | TMEM33   |
| ELF1 | TMEM39B  |
| ELF1 | TMEM50A  |
| ELF1 | TMEM59   |
| ELF1 | TMEM60   |
| ELF1 | TMEM69   |
| ELF1 | TMEM70   |
| ELF1 | TMEM87A  |
| ELF1 | TMEM91   |
| ELF1 | TMEM97   |
| ELF1 | TMEM9B   |
| ELF1 | TMF1     |
| ELF1 | TMOD3    |
| ELF1 | TMP0     |
| ELF1 | TMP0-AS1 |
| ELF1 | TMSB10   |
| ELF1 | TMSB4X   |
| ELF1 | TMUB1    |
| ELF1 | TMUB2    |
| ELF1 | TMX1     |
| ELF1 | TMX3     |
| ELF1 | TMX4     |



|      |           |
|------|-----------|
| ELF1 | TNFAIP8   |
| ELF1 | TNFAIP8L1 |
| ELF1 | TNFRSF13C |
| ELF1 | TNKS2     |
| ELF1 | TNKS2-AS1 |
| ELF1 | TNNC2     |
| ELF1 | TNP01     |
| ELF1 | TNP02     |
| ELF1 | TNP03     |
| ELF1 | TNRC6A    |
| ELF1 | TNRC6B    |
| ELF1 | TNRC6C    |
| ELF1 | TOB2      |
| ELF1 | TOMM20    |
| ELF1 | TOMM34    |
| ELF1 | TOMM7     |
| ELF1 | TOP1      |
| ELF1 | TOP2A     |
| ELF1 | TOP2B     |
| ELF1 | TOP3B     |
| ELF1 | TOPBP1    |
| ELF1 | TOPORS    |
| ELF1 | TOR2A     |
| ELF1 | TOR4A     |
| ELF1 | TOX       |
| ELF1 | TOX4      |
| ELF1 | TP53      |
| ELF1 | TP53BP2   |
| ELF1 | TP53I13   |
| ELF1 | TP53INP2  |
| ELF1 | TP53RK    |
| ELF1 | TP53TG1   |
| ELF1 | TPD52     |
| ELF1 | TPD52L2   |
| ELF1 | TPGS1     |
| ELF1 | TPGS2     |
| ELF1 | TPM1      |
| ELF1 | TPM3      |
| ELF1 | TPM4      |
| ELF1 | TPP2      |
| ELF1 | TPR       |
| ELF1 | TPRA1     |
| ELF1 | TPRKB     |
| ELF1 | TPT1      |
| ELF1 | TPX2      |
| ELF1 | TRA2A     |
| ELF1 | TRA2B     |
| ELF1 | TRABD     |
| ELF1 | TRAF2     |
| ELF1 | TRAF3IP2  |

|      |          |
|------|----------|
| ELF1 | TRAF5    |
| ELF1 | TRAFD1   |
| ELF1 | TRAPPC1  |
| ELF1 | TRAPPC11 |
| ELF1 | TRAPPC12 |
| ELF1 | TRAPPC2  |
| ELF1 | TRAPPC2B |
| ELF1 | TRAPPC3  |
| ELF1 | TRAPPC4  |
| ELF1 | TRAPPC6A |
| ELF1 | TRAPPC6B |
| ELF1 | TRG-AS1  |
| ELF1 | TRIB2    |
| ELF1 | TRIM13   |
| ELF1 | TRIM14   |
| ELF1 | TRIM24   |
| ELF1 | TRIM26   |
| ELF1 | TRIM27   |
| ELF1 | TRIM28   |
| ELF1 | TRIM33   |
| ELF1 | TRIM38   |
| ELF1 | TRIM4    |
| ELF1 | TRIM44   |
| ELF1 | TRIM5    |
| ELF1 | TRIM52   |
| ELF1 | TRIM56   |
| ELF1 | TRIM59   |
| ELF1 | TRIM69   |
| ELF1 | TRIM8    |
| ELF1 | TRIOBP   |
| ELF1 | TRIP11   |
| ELF1 | TRIP12   |
| ELF1 | TRIP13   |
| ELF1 | TRIP4    |
| ELF1 | TRMT10B  |
| ELF1 | TRMT11   |
| ELF1 | TRMT112  |
| ELF1 | TRMT1L   |
| ELF1 | TRMT5    |
| ELF1 | TRMU     |
| ELF1 | TRNAU1AP |
| ELF1 | TRNT1    |
| ELF1 | TROAP    |
| ELF1 | TROVE2   |
| ELF1 | TRPC4AP  |
| ELF1 | TRPT1    |
| ELF1 | TRPV2    |
| ELF1 | TRRAP    |
| ELF1 | TRUB1    |
| ELF1 | TSC1     |

|      |         |
|------|---------|
| ELF1 | TSC2    |
| ELF1 | TSC22D2 |
| ELF1 | TSC22D3 |
| ELF1 | TSC22D4 |
| ELF1 | TSEN34  |
| ELF1 | TSEN54  |
| ELF1 | TSFM    |
| ELF1 | TSG101  |
| ELF1 | TSN     |
| ELF1 | TSNAX   |
| ELF1 | TSPAN13 |
| ELF1 | TSPAN14 |
| ELF1 | TSP0    |
| ELF1 | TSPYL4  |
| ELF1 | TSR2    |
| ELF1 | TSR3    |
| ELF1 | TSSC4   |
| ELF1 | TSTA3   |
| ELF1 | TTC1    |
| ELF1 | TTC13   |
| ELF1 | TTC14   |
| ELF1 | TTC17   |
| ELF1 | TTC3    |
| ELF1 | TTC30A  |
| ELF1 | TTC30B  |
| ELF1 | TTC32   |
| ELF1 | TTC33   |
| ELF1 | TTC37   |
| ELF1 | TTC39C  |
| ELF1 | TTC5    |
| ELF1 | TTC7A   |
| ELF1 | TTC9C   |
| ELF1 | TTF1    |
| ELF1 | TTF2    |
| ELF1 | TTI1    |
| ELF1 | TTI2    |
| ELF1 | TTK     |
| ELF1 | TTPAL   |
| ELF1 | TTY15   |
| ELF1 | TUBA1A  |
| ELF1 | TUBA1B  |
| ELF1 | TUBA1C  |
| ELF1 | TUBA4A  |
| ELF1 | TUBB    |
| ELF1 | TUBB2A  |
| ELF1 | TUBB2B  |
| ELF1 | TUBB4B  |
| ELF1 | TUBB6   |
| ELF1 | TUBD1   |
| ELF1 | TUBG1   |

|      |           |
|------|-----------|
| ELF1 | TUFM      |
| ELF1 | TVP23C    |
| ELF1 | TWF2      |
| ELF1 | TWISTNB   |
| ELF1 | TXLNB     |
| ELF1 | TXLNG     |
| ELF1 | TXN2      |
| ELF1 | TXNDC16   |
| ELF1 | TXNDC9    |
| ELF1 | TXNL1     |
| ELF1 | TXNRD1    |
| ELF1 | TYMS      |
| ELF1 | TYSND1    |
| ELF1 | TYW5      |
| ELF1 | U2AF2     |
| ELF1 | U2SURP    |
| ELF1 | UACA      |
| ELF1 | UBA1      |
| ELF1 | UBA2      |
| ELF1 | UBA3      |
| ELF1 | UBA52     |
| ELF1 | UBA6      |
| ELF1 | UBA7      |
| ELF1 | UBAC2-AS1 |
| ELF1 | UBALD1    |
| ELF1 | UBAP1     |
| ELF1 | UBAP2     |
| ELF1 | UBB       |
| ELF1 | UBC       |
| ELF1 | UBE2A     |
| ELF1 | UBE2B     |
| ELF1 | UBE2C     |
| ELF1 | UBE2D1    |
| ELF1 | UBE2D2    |
| ELF1 | UBE2D3    |
| ELF1 | UBE2E1    |
| ELF1 | UBE2E2    |
| ELF1 | UBE2E3    |
| ELF1 | UBE2G1    |
| ELF1 | UBE2H     |
| ELF1 | UBE2I     |
| ELF1 | UBE2J1    |
| ELF1 | UBE2J2    |
| ELF1 | UBE2K     |
| ELF1 | UBE2L3    |
| ELF1 | UBE2L6    |
| ELF1 | UBE2N     |
| ELF1 | UBE2O     |
| ELF1 | UBE2Q1    |
| ELF1 | UBE2Q2    |

|      |          |
|------|----------|
| ELF1 | UBE2R2   |
| ELF1 | UBE2S    |
| ELF1 | UBE2T    |
| ELF1 | UBE2V1   |
| ELF1 | UBE2V2   |
| ELF1 | UBE3A    |
| ELF1 | UBE3B    |
| ELF1 | UBE4A    |
| ELF1 | UBE4B    |
| ELF1 | UBL5     |
| ELF1 | UBL7     |
| ELF1 | UBL7-AS1 |
| ELF1 | UBLCP1   |
| ELF1 | UBN1     |
| ELF1 | UBP1     |
| ELF1 | UBQLN1   |
| ELF1 | UBQLN2   |
| ELF1 | UBR2     |
| ELF1 | UBR3     |
| ELF1 | UBR4     |
| ELF1 | UBR5     |
| ELF1 | UBR5-AS1 |
| ELF1 | UBR7     |
| ELF1 | UBTD2    |
| ELF1 | UBTF     |
| ELF1 | UBXN1    |
| ELF1 | UBXN11   |
| ELF1 | UBXN2A   |
| ELF1 | UBXN2B   |
| ELF1 | UBXN4    |
| ELF1 | UBXN7    |
| ELF1 | UCHL3    |
| ELF1 | UCHL5    |
| ELF1 | UCK1     |
| ELF1 | UCKL1    |
| ELF1 | UCP2     |
| ELF1 | UFC1     |
| ELF1 | UFL1     |
| ELF1 | UGDH     |
| ELF1 | UGGT1    |
| ELF1 | UGP2     |
| ELF1 | UHMK1    |
| ELF1 | UHRF1    |
| ELF1 | UHRF2    |
| ELF1 | UIMC1    |
| ELF1 | UMPS     |
| ELF1 | UNC119   |
| ELF1 | UNC45A   |
| ELF1 | UNC50    |
| ELF1 | UNG      |

|      |           |
|------|-----------|
| ELF1 | UPF2      |
| ELF1 | UPF3A     |
| ELF1 | UQCC1     |
| ELF1 | UQCC2     |
| ELF1 | UQCC3     |
| ELF1 | UQCR10    |
| ELF1 | UQCR11    |
| ELF1 | UQCRB     |
| ELF1 | UQCRC1    |
| ELF1 | UQCRC2    |
| ELF1 | UQCRFS1   |
| ELF1 | UQCRH     |
| ELF1 | UQCRO     |
| ELF1 | URGCP     |
| ELF1 | URI1      |
| ELF1 | URM1      |
| ELF1 | UROD      |
| ELF1 | UROS      |
| ELF1 | USB1      |
| ELF1 | USE1      |
| ELF1 | USF2      |
| ELF1 | USF3      |
| ELF1 | USP1      |
| ELF1 | USP10     |
| ELF1 | USP11     |
| ELF1 | USP12     |
| ELF1 | USP13     |
| ELF1 | USP14     |
| ELF1 | USP15     |
| ELF1 | USP16     |
| ELF1 | USP22     |
| ELF1 | USP24     |
| ELF1 | USP3      |
| ELF1 | USP30-AS1 |
| ELF1 | USP33     |
| ELF1 | USP34     |
| ELF1 | USP37     |
| ELF1 | USP39     |
| ELF1 | USP4      |
| ELF1 | USP42     |
| ELF1 | USP47     |
| ELF1 | USP48     |
| ELF1 | USP5      |
| ELF1 | USP53     |
| ELF1 | USP6NL    |
| ELF1 | USP7      |
| ELF1 | USP8      |
| ELF1 | USP9X     |
| ELF1 | UTP14A    |
| ELF1 | UTP18     |

|      |         |
|------|---------|
| ELF1 | UTP3    |
| ELF1 | UTP6    |
| ELF1 | UTY     |
| ELF1 | UVRAG   |
| ELF1 | UXT     |
| ELF1 | VAMP1   |
| ELF1 | VAMP2   |
| ELF1 | VAMP3   |
| ELF1 | VAMP8   |
| ELF1 | VANGL1  |
| ELF1 | VAPA    |
| ELF1 | VASP    |
| ELF1 | VAV1    |
| ELF1 | VBP1    |
| ELF1 | VCP     |
| ELF1 | VCPIP1  |
| ELF1 | VCPKMT  |
| ELF1 | VDAC1   |
| ELF1 | VDAC3   |
| ELF1 | VEZF1   |
| ELF1 | VEZT    |
| ELF1 | VGLL4   |
| ELF1 | VHL     |
| ELF1 | VIPAS39 |
| ELF1 | VMA21   |
| ELF1 | VMP1    |
| ELF1 | VNN2    |
| ELF1 | VPS11   |
| ELF1 | VPS13A  |
| ELF1 | VPS13B  |
| ELF1 | VPS16   |
| ELF1 | VPS25   |
| ELF1 | VPS26A  |
| ELF1 | VPS28   |
| ELF1 | VPS29   |
| ELF1 | VPS33A  |
| ELF1 | VPS35   |
| ELF1 | VPS36   |
| ELF1 | VPS39   |
| ELF1 | VPS41   |
| ELF1 | VPS45   |
| ELF1 | VPS4A   |
| ELF1 | VPS4B   |
| ELF1 | VPS50   |
| ELF1 | VPS51   |
| ELF1 | VPS53   |
| ELF1 | VPS8    |
| ELF1 | VRK1    |
| ELF1 | VRK3    |
| ELF1 | VTA1    |

|      |         |
|------|---------|
| ELF1 | VTI1A   |
| ELF1 | VTI1B   |
| ELF1 | WAC     |
| ELF1 | WAPL    |
| ELF1 | WAS     |
| ELF1 | WASF2   |
| ELF1 | WBP1    |
| ELF1 | WBP2    |
| ELF1 | WBP4    |
| ELF1 | WDFY2   |
| ELF1 | WDHD1   |
| ELF1 | WDPCP   |
| ELF1 | WDR1    |
| ELF1 | WDR26   |
| ELF1 | WDR33   |
| ELF1 | WDR34   |
| ELF1 | WDR37   |
| ELF1 | WDR41   |
| ELF1 | WDR45B  |
| ELF1 | WDR48   |
| ELF1 | WDR53   |
| ELF1 | WDR60   |
| ELF1 | WDR61   |
| ELF1 | WDR66   |
| ELF1 | WDR70   |
| ELF1 | WDR73   |
| ELF1 | WDR76   |
| ELF1 | WDR77   |
| ELF1 | WDR82   |
| ELF1 | WDR83   |
| ELF1 | WDR830S |
| ELF1 | WDR90   |
| ELF1 | WDTC1   |
| ELF1 | WEE1    |
| ELF1 | WIPF1   |
| ELF1 | WIPF2   |
| ELF1 | WIPI2   |
| ELF1 | WNK1    |
| ELF1 | WNK2    |
| ELF1 | WNT6    |
| ELF1 | WRAP53  |
| ELF1 | WRAP73  |
| ELF1 | WRB     |
| ELF1 | WSB1    |
| ELF1 | WSB2    |
| ELF1 | WTAP    |
| ELF1 | WVC3    |
| ELF1 | XAB2    |
| ELF1 | XIAP    |
| ELF1 | XIST    |



|      |           |
|------|-----------|
| ELF1 | XKR6      |
| ELF1 | XKRX      |
| ELF1 | XPA       |
| ELF1 | XPNPEP1   |
| ELF1 | XPNPEP3   |
| ELF1 | XP01      |
| ELF1 | XP07      |
| ELF1 | XRCC1     |
| ELF1 | XRCC2     |
| ELF1 | XRCC3     |
| ELF1 | XRCC4     |
| ELF1 | XRCC5     |
| ELF1 | XRCC6     |
| ELF1 | XRN1      |
| ELF1 | XRN2      |
| ELF1 | YAF2      |
| ELF1 | YARS      |
| ELF1 | YARS2     |
| ELF1 | YBEY      |
| ELF1 | YBX1      |
| ELF1 | YEATS4    |
| ELF1 | YIPF1     |
| ELF1 | YIPF3     |
| ELF1 | YIPF4     |
| ELF1 | YIPF5     |
| ELF1 | YIPF6     |
| ELF1 | YJEFN3    |
| ELF1 | YLPM1     |
| ELF1 | YME1L1    |
| ELF1 | YOD1      |
| ELF1 | YPEL3     |
| ELF1 | YPEL5     |
| ELF1 | YTHDC1    |
| ELF1 | YTHDC2    |
| ELF1 | YTHDF2    |
| ELF1 | YTHDF3    |
| ELF1 | YWHAB     |
| ELF1 | YWHAE     |
| ELF1 | YWHAH     |
| ELF1 | YWHAQ     |
| ELF1 | YWHAZ     |
| ELF1 | YY1       |
| ELF1 | YY1AP1    |
| ELF1 | ZBED5     |
| ELF1 | ZBED5-AS1 |
| ELF1 | ZBTB1     |
| ELF1 | ZBTB10    |
| ELF1 | ZBTB14    |
| ELF1 | ZBTB17    |
| ELF1 | ZBTB20    |

|      |              |
|------|--------------|
| ELF1 | ZBTB24       |
| ELF1 | ZBTB25       |
| ELF1 | ZBTB3        |
| ELF1 | ZBTB38       |
| ELF1 | ZBTB43       |
| ELF1 | ZBTB44       |
| ELF1 | ZBTB7A       |
| ELF1 | ZBTB80S      |
| ELF1 | ZC3H10       |
| ELF1 | ZC3H13       |
| ELF1 | ZC3H14       |
| ELF1 | ZC3H15       |
| ELF1 | ZC3H18       |
| ELF1 | ZC3H4        |
| ELF1 | ZC3H6        |
| ELF1 | ZC3H7A       |
| ELF1 | ZC3H8        |
| ELF1 | ZC3HC1       |
| ELF1 | ZCCHC17      |
| ELF1 | ZCCHC7       |
| ELF1 | ZCCHC9       |
| ELF1 | ZDBF2        |
| ELF1 | ZDHHC12      |
| ELF1 | ZDHHC13      |
| ELF1 | ZDHHC17      |
| ELF1 | ZDHHC21      |
| ELF1 | ZDHHC24      |
| ELF1 | ZDHHC3       |
| ELF1 | ZDHHC6       |
| ELF1 | ZEB1         |
| ELF1 | ZFAND1       |
| ELF1 | ZFAND2B      |
| ELF1 | ZFAND3       |
| ELF1 | ZFAND4       |
| ELF1 | ZFAND5       |
| ELF1 | ZFAND6       |
| ELF1 | ZFAS1        |
| ELF1 | ZFC3H1       |
| ELF1 | ZFP64        |
| ELF1 | ZFP91        |
| ELF1 | ZFPL1        |
| ELF1 | ZFR          |
| ELF1 | ZFX          |
| ELF1 | ZFYVE16      |
| ELF1 | ZGRF1        |
| ELF1 | ZHX1-C8orf76 |
| ELF1 | ZKSCAN1      |
| ELF1 | ZKSCAN4      |
| ELF1 | ZKSCAN5      |
| ELF1 | ZMAT2        |

|      |         |
|------|---------|
| ELF1 | ZMAT5   |
| ELF1 | ZMYM1   |
| ELF1 | ZMYM2   |
| ELF1 | ZMYND19 |
| ELF1 | ZMYND8  |
| ELF1 | ZNF101  |
| ELF1 | ZNF106  |
| ELF1 | ZNF107  |
| ELF1 | ZNF131  |
| ELF1 | ZNF141  |
| ELF1 | ZNF143  |
| ELF1 | ZNF148  |
| ELF1 | ZNF165  |
| ELF1 | ZNF174  |
| ELF1 | ZNF207  |
| ELF1 | ZNF212  |
| ELF1 | ZNF22   |
| ELF1 | ZNF232  |
| ELF1 | ZNF24   |
| ELF1 | ZNF254  |
| ELF1 | ZNF26   |
| ELF1 | ZNF267  |
| ELF1 | ZNF277  |
| ELF1 | ZNF280D |
| ELF1 | ZNF281  |
| ELF1 | ZNF282  |
| ELF1 | ZNF292  |
| ELF1 | ZNF296  |
| ELF1 | ZNF318  |
| ELF1 | ZNF326  |
| ELF1 | ZNF35   |
| ELF1 | ZNF362  |
| ELF1 | ZNF367  |
| ELF1 | ZNF37A  |
| ELF1 | ZNF394  |
| ELF1 | ZNF395  |
| ELF1 | ZNF414  |
| ELF1 | ZNF415  |
| ELF1 | ZNF428  |
| ELF1 | ZNF430  |
| ELF1 | ZNF431  |
| ELF1 | ZNF451  |
| ELF1 | ZNF486  |
| ELF1 | ZNF487  |
| ELF1 | ZNF506  |
| ELF1 | ZNF514  |
| ELF1 | ZNF518A |
| ELF1 | ZNF519  |
| ELF1 | ZNF557  |
| ELF1 | ZNF566  |

|      |         |
|------|---------|
| ELF1 | ZNF570  |
| ELF1 | ZNF580  |
| ELF1 | ZNF581  |
| ELF1 | ZNF587  |
| ELF1 | ZNF592  |
| ELF1 | ZNF600  |
| ELF1 | ZNF608  |
| ELF1 | ZNF609  |
| ELF1 | ZNF611  |
| ELF1 | ZNF614  |
| ELF1 | ZNF622  |
| ELF1 | ZNF638  |
| ELF1 | ZNF644  |
| ELF1 | ZNF652  |
| ELF1 | ZNF655  |
| ELF1 | ZNF669  |
| ELF1 | ZNF672  |
| ELF1 | ZNF680  |
| ELF1 | ZNF684  |
| ELF1 | ZNF688  |
| ELF1 | ZNF692  |
| ELF1 | ZNF7    |
| ELF1 | ZNF706  |
| ELF1 | ZNF720  |
| ELF1 | ZNF738  |
| ELF1 | ZNF740  |
| ELF1 | ZNF746  |
| ELF1 | ZNF76   |
| ELF1 | ZNF761  |
| ELF1 | ZNF766  |
| ELF1 | ZNF771  |
| ELF1 | ZNF775  |
| ELF1 | ZNF780A |
| ELF1 | ZNF787  |
| ELF1 | ZNF791  |
| ELF1 | ZNF800  |
| ELF1 | ZNF813  |
| ELF1 | ZNF814  |
| ELF1 | ZNF821  |
| ELF1 | ZNF830  |
| ELF1 | ZNF831  |
| ELF1 | ZNF85   |
| ELF1 | ZNF91   |
| ELF1 | ZNF92   |
| ELF1 | ZNFX1   |
| ELF1 | ZNHIT1  |
| ELF1 | ZNHIT3  |
| ELF1 | ZPBP2   |
| ELF1 | ZPR1    |
| ELF1 | ZRANB1  |

|      |             |
|------|-------------|
| ELF1 | ZRANB2      |
| ELF1 | ZRSR2       |
| ELF1 | ZSCAN16-AS1 |
| ELF1 | ZSCAN21     |
| ELF1 | ZSCAN25     |
| ELF1 | ZSWIM3      |
| ELF1 | ZSWIM7      |
| ELF1 | ZSWIM8      |
| ELF1 | ZW10        |
| ELF1 | ZWILCH      |
| ELF1 | ZWINT       |
| ELF1 | ZXDB        |
| ELF1 | ZYX         |
| ELF2 | ACBD3       |
| ELF2 | ALYREF      |
| ELF2 | ARHGAP9     |
| ELF2 | ARRB2       |
| ELF2 | ATP6V1E1    |
| ELF2 | ATP6V1H     |
| ELF2 | BANK1       |
| ELF2 | BBIP1       |
| ELF2 | BMF         |
| ELF2 | BNIP3L      |
| ELF2 | CADPS       |
| ELF2 | CBX5        |
| ELF2 | CCDC71      |
| ELF2 | CCP110      |
| ELF2 | CENPH       |
| ELF2 | CEP120      |
| ELF2 | CFDP1       |
| ELF2 | CGGBP1      |
| ELF2 | CHMP1B      |
| ELF2 | CLASRP      |
| ELF2 | CLK2        |
| ELF2 | CRLF3       |
| ELF2 | CSRNP1      |
| ELF2 | CTDSP1      |
| ELF2 | CYSLTR1     |
| ELF2 | DIAPH1      |
| ELF2 | DPEP2       |
| ELF2 | DUSP1       |
| ELF2 | E2F2        |
| ELF2 | ELF2        |
| ELF2 | ERN1        |
| ELF2 | FOXO1       |
| ELF2 | GOLGA5      |
| ELF2 | IFNGR1      |
| ELF2 | ING2        |
| ELF2 | IQGAP1      |
| ELF2 | ISL2        |

|      |           |
|------|-----------|
| ELF2 | JUNB      |
| ELF2 | KDM5A     |
| ELF2 | LMBRD1    |
| ELF2 | LMNA      |
| ELF2 | MED18     |
| ELF2 | METTTL21A |
| ELF2 | MGRN1     |
| ELF2 | MTMR2     |
| ELF2 | MTMR9     |
| ELF2 | MYL6B     |
| ELF2 | MYO1F     |
| ELF2 | NFKBID    |
| ELF2 | NUAK2     |
| ELF2 | P2RX1     |
| ELF2 | PAFAH1B2  |
| ELF2 | PDLIM1    |
| ELF2 | PGGT1B    |
| ELF2 | PHRF1     |
| ELF2 | PLAC8     |
| ELF2 | PPP1R35   |
| ELF2 | PRDM2     |
| ELF2 | PRPF38A   |
| ELF2 | R3HCC1L   |
| ELF2 | RAB5B     |
| ELF2 | RABEP2    |
| ELF2 | RDM1      |
| ELF2 | RNF214    |
| ELF2 | RTKN2     |
| ELF2 | S100A11   |
| ELF2 | S100A4    |
| ELF2 | SETX      |
| ELF2 | SLX4IP    |
| ELF2 | SPI1      |
| ELF2 | SPSB3     |
| ELF2 | SUPT20H   |
| ELF2 | SZT2      |
| ELF2 | TDP1      |
| ELF2 | TMEM115   |
| ELF2 | TMEM39A   |
| ELF2 | TRABD     |
| ELF2 | TRAF6     |
| ELF2 | TTC17     |
| ELF2 | TTI2      |
| ELF2 | USP8      |
| ELF2 | UVRAG     |
| ELF2 | VAMP5     |
| ELF2 | VRK3      |
| ELF2 | WDFY2     |
| ELF2 | ZDHHC20   |
| ELF2 | ZFP91     |

|      |          |
|------|----------|
| ELF2 | ZNF266   |
| ELF2 | ZNF408   |
| ELF2 | ZNF587B  |
| ELF2 | ZNF608   |
| ELF4 | ACKR4    |
| ELF4 | ACOX1    |
| ELF4 | ADAR     |
| ELF4 | AP1AR    |
| ELF4 | ARF4-AS1 |
| ELF4 | ARHGAP5  |
| ELF4 | B4GALT1  |
| ELF4 | C5orf63  |
| ELF4 | CAPG     |
| ELF4 | CCDC82   |
| ELF4 | CDKN2D   |
| ELF4 | CENPN    |
| ELF4 | CEP44    |
| ELF4 | DCUN1D4  |
| ELF4 | DEF8     |
| ELF4 | DNAJC14  |
| ELF4 | EFL1     |
| ELF4 | EIF2S3   |
| ELF4 | ELF4     |
| ELF4 | ERI2     |
| ELF4 | EXOC5    |
| ELF4 | FADS2    |
| ELF4 | FAM126A  |
| ELF4 | FAM72D   |
| ELF4 | GHDC     |
| ELF4 | GINM1    |
| ELF4 | HAUS8    |
| ELF4 | HENMT1   |
| ELF4 | IGSF10   |
| ELF4 | INPP5K   |
| ELF4 | INTS4    |
| ELF4 | KAT7     |
| ELF4 | KDF1     |
| ELF4 | KDM6A    |
| ELF4 | LAMTOR4  |
| ELF4 | LYPD6B   |
| ELF4 | MAPK1    |
| ELF4 | MAPK8    |
| ELF4 | MDM2     |
| ELF4 | MED20    |
| ELF4 | MEF2A    |
| ELF4 | MICAL3   |
| ELF4 | MSRA     |
| ELF4 | MX1      |
| ELF4 | MYH10    |
| ELF4 | MYO9B    |

|      |           |
|------|-----------|
| ELF4 | NAF1      |
| ELF4 | NARFL     |
| ELF4 | NELFB     |
| ELF4 | PCSK7     |
| ELF4 | PDLIM2    |
| ELF4 | PEX26     |
| ELF4 | PHC3      |
| ELF4 | PIGM      |
| ELF4 | PILRB     |
| ELF4 | PIP4K2A   |
| ELF4 | POM121C   |
| ELF4 | RAB11FIP2 |
| ELF4 | RAD18     |
| ELF4 | RAP2C     |
| ELF4 | RBM12     |
| ELF4 | RIPK1     |
| ELF4 | RNF111    |
| ELF4 | RNF13     |
| ELF4 | RNFT1     |
| ELF4 | S100A11   |
| ELF4 | S1PR2     |
| ELF4 | SARS2     |
| ELF4 | SCMH1     |
| ELF4 | SEC24C    |
| ELF4 | SEPT11    |
| ELF4 | SERINC1   |
| ELF4 | SLC25A24  |
| ELF4 | SLC39A3   |
| ELF4 | SLC41A3   |
| ELF4 | SMUG1     |
| ELF4 | SPAG5     |
| ELF4 | SPRTN     |
| ELF4 | SRGAP2B   |
| ELF4 | STK10     |
| ELF4 | TAF15     |
| ELF4 | TCF20     |
| ELF4 | TMX4      |
| ELF4 | TRAIP     |
| ELF4 | TTC7A     |
| ELF4 | TTI2      |
| ELF4 | TUBB6     |
| ELF4 | UGP2      |
| ELF4 | UVRAG     |
| ELF4 | VPS52     |
| ELF4 | VPS8      |
| ELF4 | ZBTB24    |
| ELF4 | ZNF230    |
| ELF4 | ZNF362    |
| ELF4 | ZNF761    |
| ELF4 | ZSWIM8    |



|      |          |
|------|----------|
| ELK1 | ABCF1    |
| ELK1 | ACTG1    |
| ELK1 | APP      |
| ELK1 | ATP1B3   |
| ELK1 | B3GALNT2 |
| ELK1 | BAG3     |
| ELK1 | BRCA1    |
| ELK1 | C12orf10 |
| ELK1 | C18orf54 |
| ELK1 | CALHM2   |
| ELK1 | CCDC189  |
| ELK1 | CCNB1IP1 |
| ELK1 | CCND1    |
| ELK1 | CD48     |
| ELK1 | CDK14    |
| ELK1 | CHCHD2   |
| ELK1 | C0Q3     |
| ELK1 | CYB561   |
| ELK1 | DCTPP1   |
| ELK1 | DENND2D  |
| ELK1 | DHRS7B   |
| ELK1 | DNAJB1   |
| ELK1 | DTL      |
| ELK1 | ELK1     |
| ELK1 | ELL      |
| ELK1 | ENTHD1   |
| ELK1 | FAM126A  |
| ELK1 | FAM8A1   |
| ELK1 | FBXL18   |
| ELK1 | FMR1     |
| ELK1 | FOXO3    |
| ELK1 | FYN      |
| ELK1 | GAPVD1   |
| ELK1 | HLA-DRA  |
| ELK1 | HYOU1    |
| ELK1 | KCNN4    |
| ELK1 | LTC4S    |
| ELK1 | MAPK6    |
| ELK1 | MCFD2    |
| ELK1 | MLH1     |
| ELK1 | MTRF1L   |
| ELK1 | MYO1F    |
| ELK1 | N4BP3    |
| ELK1 | NEDD1    |
| ELK1 | PATL1    |
| ELK1 | PES1     |
| ELK1 | POLR1B   |
| ELK1 | PPIL2    |
| ELK1 | PPP5C    |
| ELK1 | PRR5     |

|      |          |
|------|----------|
| ELK1 | REX04    |
| ELK1 | RRP9     |
| ELK1 | SAV1     |
| ELK1 | SERPINI1 |
| ELK1 | SLC25A36 |
| ELK1 | SLC30A7  |
| ELK1 | SLC35E1  |
| ELK1 | SMIM12   |
| ELK1 | SNAPC5   |
| ELK1 | SNX9     |
| ELK1 | SPHK1    |
| ELK1 | STIM2    |
| ELK1 | TBL3     |
| ELK1 | TIMM10B  |
| ELK1 | TMED7    |
| ELK1 | TMEM267  |
| ELK1 | TMSB10   |
| ELK1 | TOMM22   |
| ELK1 | TP53     |
| ELK1 | TTC27    |
| ELK1 | UBE2D1   |
| ELK1 | UBE2M    |
| ELK1 | USP48    |
| ELK1 | VLDLR    |
| ELK1 | VMP1     |
| ELK1 | YBX1     |
| ELK1 | ZNF22    |
| ELK3 | ABHD13   |
| ELK3 | ACP5     |
| ELK3 | ADAMTS6  |
| ELK3 | AHNAK    |
| ELK3 | AKT2     |
| ELK3 | AP0L1    |
| ELK3 | ARID4A   |
| ELK3 | ATF7IP   |
| ELK3 | ATG7     |
| ELK3 | ATP6V0E1 |
| ELK3 | BLNK     |
| ELK3 | BMP2K    |
| ELK3 | BORCS7   |
| ELK3 | BTNL9    |
| ELK3 | C14orf28 |
| ELK3 | C17orf49 |
| ELK3 | C18orf21 |
| ELK3 | C6orf99  |
| ELK3 | CAP1     |
| ELK3 | CARMIL2  |
| ELK3 | CAST     |
| ELK3 | CCPG1    |
| ELK3 | CD68     |

|      |          |
|------|----------|
| ELK3 | CENPT    |
| ELK3 | CHD2     |
| ELK3 | CHPF2    |
| ELK3 | CLCN3    |
| ELK3 | COBLL1   |
| ELK3 | COPS7A   |
| ELK3 | CYBB     |
| ELK3 | CYTH1    |
| ELK3 | CYTIP    |
| ELK3 | DHRS9    |
| ELK3 | DHX40    |
| ELK3 | DNAJB9   |
| ELK3 | DOCK8    |
| ELK3 | DSTYK    |
| ELK3 | DYM      |
| ELK3 | EBF1     |
| ELK3 | ELK3     |
| ELK3 | EPHB6    |
| ELK3 | ERGIC2   |
| ELK3 | EVI2B    |
| ELK3 | FAM49A   |
| ELK3 | FCGR2B   |
| ELK3 | FRA10AC1 |
| ELK3 | FZD6     |
| ELK3 | GALNT7   |
| ELK3 | GPR137B  |
| ELK3 | GRN      |
| ELK3 | HELZ     |
| ELK3 | HPCAL1   |
| ELK3 | IRF2     |
| ELK3 | ITM2C    |
| ELK3 | JAK1     |
| ELK3 | LAPTM5   |
| ELK3 | LGALS1   |
| ELK3 | LILRB1   |
| ELK3 | LRP10    |
| ELK3 | LTB      |
| ELK3 | LY96     |
| ELK3 | MAGED1   |
| ELK3 | MAGEH1   |
| ELK3 | MED9     |
| ELK3 | MORF4L2  |
| ELK3 | MPEG1    |
| ELK3 | MS4A1    |
| ELK3 | MTOR     |
| ELK3 | MYL12A   |
| ELK3 | NET1     |
| ELK3 | NNT-AS1  |
| ELK3 | NPAT     |
| ELK3 | NXT2     |

|      |            |
|------|------------|
| ELK3 | ODF2       |
| ELK3 | OSBPL2     |
| ELK3 | OST4       |
| ELK3 | PACSIN2    |
| ELK3 | PAG1       |
| ELK3 | PARM1      |
| ELK3 | PARP4      |
| ELK3 | PARP8      |
| ELK3 | PGGT1B     |
| ELK3 | PGM3       |
| ELK3 | PHACTR1    |
| ELK3 | PHC1       |
| ELK3 | PLD4       |
| ELK3 | POU2AF1    |
| ELK3 | PRCP       |
| ELK3 | PREX1      |
| ELK3 | PRPF6      |
| ELK3 | PTPRN2     |
| ELK3 | PTTG1IP    |
| ELK3 | RAB11FIP4  |
| ELK3 | RABEP2     |
| ELK3 | RALGPS2    |
| ELK3 | RGS1       |
| ELK3 | RNASE4     |
| ELK3 | RRBP1      |
| ELK3 | SAMD15     |
| ELK3 | SEC24A     |
| ELK3 | SERINC1    |
| ELK3 | SH3BGR3    |
| ELK3 | SHKBP1     |
| ELK3 | SLC35C2    |
| ELK3 | SLC39A13   |
| ELK3 | SLC43A1    |
| ELK3 | SLC43A2    |
| ELK3 | S0CS3      |
| ELK3 | SRF        |
| ELK3 | SSPN       |
| ELK3 | STK17B     |
| ELK3 | SYMPK      |
| ELK3 | TAOK3      |
| ELK3 | TFIP11     |
| ELK3 | TFRC       |
| ELK3 | TGFBR2     |
| ELK3 | TMEM175    |
| ELK3 | TMEM187    |
| ELK3 | TMEM44-AS1 |
| ELK3 | TMEM59     |
| ELK3 | TMSB4X     |
| ELK3 | TOMM34     |
| ELK3 | TRAM1      |

|      |         |
|------|---------|
| ELK3 | TSC22D3 |
| ELK3 | TSPAN31 |
| ELK3 | TSPYL2  |
| ELK3 | UBN2    |
| ELK3 | ULK3    |
| ELK3 | UNC119  |
| ELK3 | USP19   |
| ELK3 | USP53   |
| ELK3 | WASF2   |
| ELK3 | YIPF3   |
| ELK3 | YPEL5   |
| ELK3 | ZBTB7B  |
| ELK3 | ZFC3H1  |
| ELK3 | ZNF224  |
| ELK3 | ZNF335  |
| ELK4 | AFTPH   |
| ELK4 | AMIG02  |
| ELK4 | ARHGEF3 |
| ELK4 | CAPZA1  |
| ELK4 | CDC42   |
| ELK4 | CDK11B  |
| ELK4 | CHRNA1  |
| ELK4 | CNST    |
| ELK4 | CUL4B   |
| ELK4 | CXXC5   |
| ELK4 | ELK4    |
| ELK4 | ELMSAN1 |
| ELK4 | FOXP1   |
| ELK4 | GNPNAT1 |
| ELK4 | KCNAB2  |
| ELK4 | MAP3K13 |
| ELK4 | MAPK10  |
| ELK4 | MDM4    |
| ELK4 | MIEF1   |
| ELK4 | NFKBIE  |
| ELK4 | PABPC4  |
| ELK4 | RHBDF2  |
| ELK4 | RINL    |
| ELK4 | SH2D3C  |
| ELK4 | SKIL    |
| ELK4 | SNX11   |
| ELK4 | THTPA   |
| ELK4 | TLK1    |
| ELK4 | TNRC6B  |
| ELK4 | TRPV2   |
| ELK4 | XRRA1   |
| ELK4 | ZMYND11 |
| ELK4 | ZNF768  |
| ERF  | C5orf34 |
| ERF  | CCDC77  |

|       |          |
|-------|----------|
| ERF   | IL6ST    |
| ERF   | NEAT1    |
| ERF   | SERP2    |
| ERF   | SPTBN1   |
| ERF   | UTP6     |
| ESRRR | ABCA5    |
| ESRRR | ABCC4    |
| ESRRR | ACAD9    |
| ESRRR | ACBD3    |
| ESRRR | ACBD6    |
| ESRRR | ACP5     |
| ESRRR | ADO      |
| ESRRR | ADPGK    |
| ESRRR | ADRM1    |
| ESRRR | ADSL     |
| ESRRR | AHCY     |
| ESRRR | AIFM1    |
| ESRRR | AIMP2    |
| ESRRR | AK6      |
| ESRRR | AKAP1    |
| ESRRR | AKAP12   |
| ESRRR | ALD0A    |
| ESRRR | ALD0C    |
| ESRRR | ALG13    |
| ESRRR | ALG3     |
| ESRRR | ALOX5    |
| ESRRR | AMZ2     |
| ESRRR | ANXA7    |
| ESRRR | AP4M1    |
| ESRRR | ARF3     |
| ESRRR | ARHGDIA  |
| ESRRR | ARID3A   |
| ESRRR | ARL17B   |
| ESRRR | ARMCX3   |
| ESRRR | ARPC5L   |
| ESRRR | ASNA1    |
| ESRRR | ASXL1    |
| ESRRR | ATAD3B   |
| ESRRR | ATG3     |
| ESRRR | ATIC     |
| ESRRR | ATN1     |
| ESRRR | ATP1B3   |
| ESRRR | ATP6V0A2 |
| ESRRR | ATP6V0B  |
| ESRRR | ATP6V1F  |
| ESRRR | ATXN2    |
| ESRRR | AXIN1    |
| ESRRR | B3GALT6  |
| ESRRR | BAG5     |
| ESRRR | BAP1     |

|       |          |
|-------|----------|
| ESRRA | BCAP31   |
| ESRRA | BCAR3    |
| ESRRA | BCAS2    |
| ESRRA | BCAT2    |
| ESRRA | BCKDK    |
| ESRRA | BCL2L13  |
| ESRRA | BET1L    |
| ESRRA | BMF      |
| ESRRA | BMP2K    |
| ESRRA | BSG      |
| ESRRA | C12orf4  |
| ESRRA | C15orf62 |
| ESRRA | C19orf24 |
| ESRRA | C19orf70 |
| ESRRA | C20orf27 |
| ESRRA | C6orf136 |
| ESRRA | C8orf59  |
| ESRRA | CACUL1   |
| ESRRA | CACYBP   |
| ESRRA | CAMK1D   |
| ESRRA | CBWD2    |
| ESRRA | CCAR1    |
| ESRRA | CCDC106  |
| ESRRA | CCDC107  |
| ESRRA | CCDC12   |
| ESRRA | CCDC85B  |
| ESRRA | CCDC86   |
| ESRRA | CCDC88A  |
| ESRRA | CCNE2    |
| ESRRA | CCT2     |
| ESRRA | CCT5     |
| ESRRA | CCT7     |
| ESRRA | CD320    |
| ESRRA | CD46     |
| ESRRA | CD82     |
| ESRRA | CDK11A   |
| ESRRA | CELF1    |
| ESRRA | CELF2    |
| ESRRA | CEP95    |
| ESRRA | CEPT1    |
| ESRRA | CGGBP1   |
| ESRRA | CHAC1    |
| ESRRA | CHD1     |
| ESRRA | CINP     |
| ESRRA | CITED4   |
| ESRRA | CKAP4    |
| ESRRA | CLNS1A   |
| ESRRA | CMSS1    |
| ESRRA | CMTM7    |
| ESRRA | CNDP2    |

|       |          |
|-------|----------|
| ESRRA | COASY    |
| ESRRA | COG3     |
| ESRRA | COG8     |
| ESRRA | COX5B    |
| ESRRA | CREB3    |
| ESRRA | CRYZL1   |
| ESRRA | CYB5R2   |
| ESRRA | CYC1     |
| ESRRA | CYCS     |
| ESRRA | CYSLTR1  |
| ESRRA | DAPK3    |
| ESRRA | DBP      |
| ESRRA | DCAF13   |
| ESRRA | DCAF4    |
| ESRRA | DCAF6    |
| ESRRA | DCTPP1   |
| ESRRA | DDX21    |
| ESRRA | DDX27    |
| ESRRA | DDX3X    |
| ESRRA | DDX42    |
| ESRRA | DDX51    |
| ESRRA | DENR     |
| ESRRA | DESI1    |
| ESRRA | DGKD     |
| ESRRA | DHCR7    |
| ESRRA | DIMT1    |
| ESRRA | DIS3     |
| ESRRA | DKC1     |
| ESRRA | DMWD     |
| ESRRA | DOLK     |
| ESRRA | DPH2     |
| ESRRA | DPP8     |
| ESRRA | DTD2     |
| ESRRA | DUS1L    |
| ESRRA | DUS3L    |
| ESRRA | DYRK1B   |
| ESRRA | E2F2     |
| ESRRA | EBF1     |
| ESRRA | EBNA1BP2 |
| ESRRA | EEF1G    |
| ESRRA | EFCAB2   |
| ESRRA | EFHD2    |
| ESRRA | EFTUD2   |
| ESRRA | EIF1AX   |
| ESRRA | EIF2S1   |
| ESRRA | EIF3G    |
| ESRRA | EIF3I    |
| ESRRA | EIF3J    |
| ESRRA | EIF4E    |
| ESRRA | EIF4G1   |



|       |           |
|-------|-----------|
| ESRRA | EIF4G2    |
| ESRRA | EIF4H     |
| ESRRA | EIF5B     |
| ESRRA | ELOF1     |
| ESRRA | ELOVL1    |
| ESRRA | EN01      |
| ESRRA | ENOPH1    |
| ESRRA | EPB41     |
| ESRRA | ERCC3     |
| ESRRA | ERLIN1    |
| ESRRA | ESRRA     |
| ESRRA | ETF1      |
| ESRRA | EXOG      |
| ESRRA | EXOSC5    |
| ESRRA | FABP5     |
| ESRRA | FAM136A   |
| ESRRA | FAM173A   |
| ESRRA | FAM49A    |
| ESRRA | FAM50A    |
| ESRRA | FANCF     |
| ESRRA | FAR1      |
| ESRRA | FARSA     |
| ESRRA | FASTKD1   |
| ESRRA | FBL       |
| ESRRA | FKBP15    |
| ESRRA | FKBP4     |
| ESRRA | FMNL1     |
| ESRRA | FMNL3     |
| ESRRA | GABARAPL1 |
| ESRRA | GADD45G   |
| ESRRA | GAR1      |
| ESRRA | GAS2L3    |
| ESRRA | GIMAP2    |
| ESRRA | GLRX3     |
| ESRRA | GMPPB     |
| ESRRA | GNPTAB    |
| ESRRA | GOLIM4    |
| ESRRA | GOLT1B    |
| ESRRA | GPATCH4   |
| ESRRA | GPN2      |
| ESRRA | GPR146    |
| ESRRA | GPX7      |
| ESRRA | GRPEL1    |
| ESRRA | GRWD1     |
| ESRRA | GTF2F1    |
| ESRRA | GTF2H1    |
| ESRRA | GTF3C6    |
| ESRRA | HACD1     |
| ESRRA | HCG11     |
| ESRRA | HGS       |

|       |           |
|-------|-----------|
| ESRRA | HIP1      |
| ESRRA | HM13      |
| ESRRA | HSBP1     |
| ESRRA | HSF2      |
| ESRRA | HSP90AB1  |
| ESRRA | HSPA8     |
| ESRRA | HSPA9     |
| ESRRA | HSPD1     |
| ESRRA | HSPE1     |
| ESRRA | HUWE1     |
| ESRRA | IBTK      |
| ESRRA | ICE2      |
| ESRRA | ID3       |
| ESRRA | ILF2      |
| ESRRA | IMMP2L    |
| ESRRA | IMPA1     |
| ESRRA | INF2      |
| ESRRA | INTS1     |
| ESRRA | IP013     |
| ESRRA | IP07      |
| ESRRA | IRAK1     |
| ESRRA | ISOC2     |
| ESRRA | ITGB2     |
| ESRRA | JAZF1     |
| ESRRA | KCNQ10T1  |
| ESRRA | KCTD5     |
| ESRRA | KIAA1191  |
| ESRRA | KLF6      |
| ESRRA | KPNB1     |
| ESRRA | KRT18     |
| ESRRA | L3MBTL2   |
| ESRRA | LANCL1    |
| ESRRA | LDHA      |
| ESRRA | LGALS8    |
| ESRRA | LIN37     |
| ESRRA | LINC00467 |
| ESRRA | LINC00926 |
| ESRRA | LPCAT1    |
| ESRRA | LRRC14    |
| ESRRA | LRRC47    |
| ESRRA | LY75      |
| ESRRA | M6PR      |
| ESRRA | MALSU1    |
| ESRRA | MAP3K12   |
| ESRRA | MAP3K13   |
| ESRRA | MAP3K14   |
| ESRRA | MAPKAPK2  |
| ESRRA | MARCKS    |
| ESRRA | MARS2     |
| ESRRA | MAU2      |

|       |           |
|-------|-----------|
| ESRRR | MCTS1     |
| ESRRR | MCUR1     |
| ESRRR | ME2       |
| ESRRR | MED19     |
| ESRRR | METT18    |
| ESRRR | METT3     |
| ESRRR | METT5     |
| ESRRR | MFNG      |
| ESRRR | MFSD2A    |
| ESRRR | MGAT1     |
| ESRRR | MGLL      |
| ESRRR | MGMT      |
| ESRRR | MIF       |
| ESRRR | MIR3142HG |
| ESRRR | MLF2      |
| ESRRR | MOB4      |
| ESRRR | MOGS      |
| ESRRR | MORC3     |
| ESRRR | MPDU1     |
| ESRRR | MPV17     |
| ESRRR | MRPL12    |
| ESRRR | MRPL20    |
| ESRRR | MRPL21    |
| ESRRR | MRPL3     |
| ESRRR | MRPL52    |
| ESRRR | MRPL55    |
| ESRRR | MRPS16    |
| ESRRR | MRPS18B   |
| ESRRR | MRPS2     |
| ESRRR | MST01     |
| ESRRR | MTCH1     |
| ESRRR | MTMR14    |
| ESRRR | MYD88     |
| ESRRR | NAA10     |
| ESRRR | NAMPT     |
| ESRRR | NCL       |
| ESRRR | NCLN      |
| ESRRR | NDOR1     |
| ESRRR | NDUFA1    |
| ESRRR | NDUFA5    |
| ESRRR | NDUFAF1   |
| ESRRR | NDUFB2    |
| ESRRR | NDUFB7    |
| ESRRR | NDUFB9    |
| ESRRR | NDUFS6    |
| ESRRR | NDUFS7    |
| ESRRR | NEDD4L    |
| ESRRR | NEK9      |
| ESRRR | NFE2L1    |
| ESRRR | NFKB1     |

|       |          |
|-------|----------|
| ESRRR | NHP2     |
| ESRRR | NIFK     |
| ESRRR | NIFK-AS1 |
| ESRRR | NIN      |
| ESRRR | NME1     |
| ESRRR | NOB1     |
| ESRRR | NOC2L    |
| ESRRR | NOL10    |
| ESRRR | NOL11    |
| ESRRR | NOL8     |
| ESRRR | NOLC1    |
| ESRRR | NOP10    |
| ESRRR | NPM1     |
| ESRRR | NPM3     |
| ESRRR | NPW      |
| ESRRR | NR1H2    |
| ESRRR | NR6A1    |
| ESRRR | NSF      |
| ESRRR | NUDC     |
| ESRRR | NUFIP1   |
| ESRRR | NXT1     |
| ESRRR | NXT2     |
| ESRRR | ODC1     |
| ESRRR | OGT      |
| ESRRR | OPA1     |
| ESRRR | OPN3     |
| ESRRR | ORAI1    |
| ESRRR | ORA0V1   |
| ESRRR | ORMDL1   |
| ESRRR | OTUD7B   |
| ESRRR | OXSRI    |
| ESRRR | PA2G4    |
| ESRRR | PAIP1    |
| ESRRR | PAK1IP1  |
| ESRRR | PARVB    |
| ESRRR | PCGF5    |
| ESRRR | PCID2    |
| ESRRR | PCNP     |
| ESRRR | PDCD2L   |
| ESRRR | PDCD5    |
| ESRRR | PDCD6IP  |
| ESRRR | PFDN2    |
| ESRRR | PFDN6    |
| ESRRR | PGAM1    |
| ESRRR | PGAP2    |
| ESRRR | PGK1     |
| ESRRR | PHB      |
| ESRRR | PHB2     |
| ESRRR | PHF5A    |
| ESRRR | PIBF1    |

|       |        |
|-------|--------|
| ESRRA | PIGF   |
| ESRRA | PIGT   |
| ESRRA | PIGW   |
| ESRRA | PLAA   |
| ESRRA | PLAGL1 |
| ESRRA | PLD6   |
| ESRRA | PLK3   |
| ESRRA | PLP2   |
| ESRRA | PN01   |
| ESRRA | PNPLA2 |
| ESRRA | PNPLA4 |
| ESRRA | P0LB   |
| ESRRA | P0LR2A |
| ESRRA | P0LR2I |
| ESRRA | P0LR2M |
| ESRRA | P0LR3H |
| ESRRA | POMP   |
| ESRRA | PPA1   |
| ESRRA | PPAN   |
| ESRRA | PPP4R2 |
| ESRRA | PRAF2  |
| ESRRA | PRKCZ  |
| ESRRA | PRMT1  |
| ESRRA | PRPF4  |
| ESRRA | PRR13  |
| ESRRA | PRRC2A |
| ESRRA | PSAT1  |
| ESRRA | PSMA2  |
| ESRRA | PSMA3  |
| ESRRA | PSMB1  |
| ESRRA | PSMC1  |
| ESRRA | PSMC3  |
| ESRRA | PSMD11 |
| ESRRA | PSMD13 |
| ESRRA | PSMD14 |
| ESRRA | PSMD5  |
| ESRRA | PSMD7  |
| ESRRA | PTCD1  |
| ESRRA | PTGES2 |
| ESRRA | PUM3   |
| ESRRA | PXDN   |
| ESRRA | PYCARD |
| ESRRA | RAB21  |
| ESRRA | RAB33A |
| ESRRA | RAB3IP |
| ESRRA | RAB5A  |
| ESRRA | RAB7A  |
| ESRRA | RABEPK |
| ESRRA | RAI1   |
| ESRRA | RAN    |

|       |          |
|-------|----------|
| ESRRR | RBM15B   |
| ESRRR | RBM25    |
| ESRRR | RBM3     |
| ESRRR | RBM8A    |
| ESRRR | RBPJ     |
| ESRRR | RCL1     |
| ESRRR | RELB     |
| ESRRR | RELL2    |
| ESRRR | RFWD3    |
| ESRRR | RNASEH2B |
| ESRRR | RNF121   |
| ESRRR | RNF170   |
| ESRRR | RNF216   |
| ESRRR | RNH1     |
| ESRRR | RPAP1    |
| ESRRR | RPL17    |
| ESRRR | RPL22L1  |
| ESRRR | RPL36AL  |
| ESRRR | RPS19BP1 |
| ESRRR | RRP1     |
| ESRRR | RRP1B    |
| ESRRR | RRP9     |
| ESRRR | RSL24D1  |
| ESRRR | RTCB     |
| ESRRR | RUBCN    |
| ESRRR | RWDD1    |
| ESRRR | S100A4   |
| ESRRR | S100PBP  |
| ESRRR | S1PR4    |
| ESRRR | SAFB2    |
| ESRRR | SAMM50   |
| ESRRR | SAMSN1   |
| ESRRR | SARS     |
| ESRRR | SAYSD1   |
| ESRRR | SBF1     |
| ESRRR | SCAP     |
| ESRRR | SDAD1    |
| ESRRR | SERBP1   |
| ESRRR | SGCE     |
| ESRRR | SIKE1    |
| ESRRR | SLC25A38 |
| ESRRR | SLC26A2  |
| ESRRR | SLC2A11  |
| ESRRR | SLC35C2  |
| ESRRR | SLC35F2  |
| ESRRR | SLC39A10 |
| ESRRR | SLC44A1  |
| ESRRR | SLC4A7   |
| ESRRR | SLC9A3R1 |
| ESRRR | SLIRP    |

|       |            |
|-------|------------|
| ESRRR | SMIM12     |
| ESRRR | SNRPF      |
| ESRRR | SNRPG      |
| ESRRR | SNU13      |
| ESRRR | SNUPN      |
| ESRRR | SNX14      |
| ESRRR | SORD       |
| ESRRR | SPG21      |
| ESRRR | SPRYD7     |
| ESRRR | SPTBN1     |
| ESRRR | SRFBP1     |
| ESRRR | SRM        |
| ESRRR | SRPRA      |
| ESRRR | SSBP1      |
| ESRRR | SSSCA1     |
| ESRRR | ST13       |
| ESRRR | ST6GALNAC3 |
| ESRRR | STAT1      |
| ESRRR | STAT5A     |
| ESRRR | STIP1      |
| ESRRR | STK4       |
| ESRRR | STOML2     |
| ESRRR | STX18      |
| ESRRR | STX4       |
| ESRRR | STYX       |
| ESRRR | SUB1       |
| ESRRR | SUGCT      |
| ESRRR | TAC01      |
| ESRRR | TBK1       |
| ESRRR | TBL1X      |
| ESRRR | TBL3       |
| ESRRR | TCERG1     |
| ESRRR | TEL02      |
| ESRRR | TEX10      |
| ESRRR | TFAP4      |
| ESRRR | TFCP2      |
| ESRRR | THAP4      |
| ESRRR | THOC5      |
| ESRRR | TIMM13     |
| ESRRR | TIMM44     |
| ESRRR | TIMM9      |
| ESRRR | TKFC       |
| ESRRR | TMEM126A   |
| ESRRR | TMEM126B   |
| ESRRR | TMEM147    |
| ESRRR | TMEM218    |
| ESRRR | TMEM70     |
| ESRRR | TMSB10     |
| ESRRR | TMSB4X     |
| ESRRR | TMX2       |

|       |         |
|-------|---------|
| ESRRA | TNFAIP3 |
| ESRRA | TOMM22  |
| ESRRA | TOMM40  |
| ESRRA | TPD52L2 |
| ESRRA | TPR     |
| ESRRA | TPST2   |
| ESRRA | TRAFD1  |
| ESRRA | TRIM56  |
| ESRRA | TRM0    |
| ESRRA | TRMT1   |
| ESRRA | TRMT6   |
| ESRRA | TRPM7   |
| ESRRA | TRUB2   |
| ESRRA | TSEN2   |
| ESRRA | TSPAN31 |
| ESRRA | TSR2    |
| ESRRA | TSSC4   |
| ESRRA | TTC1    |
| ESRRA | TTF1    |
| ESRRA | TUBGCP4 |
| ESRRA | TXN     |
| ESRRA | TXNL1   |
| ESRRA | TYMP    |
| ESRRA | UBE2D3  |
| ESRRA | UBE2F   |
| ESRRA | UBE4A   |
| ESRRA | UBQLN4  |
| ESRRA | UBXN8   |
| ESRRA | UPRT    |
| ESRRA | UQCRC1  |
| ESRRA | UQCRQ   |
| ESRRA | UTP18   |
| ESRRA | UTP4    |
| ESRRA | VASP    |
| ESRRA | VCP     |
| ESRRA | VPS13C  |
| ESRRA | VPS26A  |
| ESRRA | VPS4B   |
| ESRRA | WDR4    |
| ESRRA | WDR74   |
| ESRRA | WWP1    |
| ESRRA | XPOT    |
| ESRRA | YARS    |
| ESRRA | YBX1    |
| ESRRA | YIPF2   |
| ESRRA | YWHAG   |
| ESRRA | ZBTB45  |
| ESRRA | ZC3H8   |
| ESRRA | ZDHHC24 |
| ESRRA | ZFP91   |



|       |            |
|-------|------------|
| ESRRA | ZFR        |
| ESRRA | ZFYVE27    |
| ESRRA | ZNF230     |
| ESRRA | ZNF275     |
| ESRRA | ZNF35      |
| ESRRA | ZNF593     |
| ESRRA | ZNF667-AS1 |
| ESRRA | ZNHIT2     |
| ETS1  | A4GALT     |
| ETS1  | AAMDC      |
| ETS1  | ABCA7      |
| ETS1  | ABCB7      |
| ETS1  | ABHD14B    |
| ETS1  | ABLIM1     |
| ETS1  | ACAA1      |
| ETS1  | ACAA2      |
| ETS1  | ACAD10     |
| ETS1  | ACAD8      |
| ETS1  | ACAP2      |
| ETS1  | ACBD3      |
| ETS1  | ACBD4      |
| ETS1  | ACLY       |
| ETS1  | ACOT13     |
| ETS1  | ACOX3      |
| ETS1  | ACSF2      |
| ETS1  | ACSS1      |
| ETS1  | ACTB       |
| ETS1  | ACTG1      |
| ETS1  | ACTR1A     |
| ETS1  | ACTR2      |
| ETS1  | ACTR3      |
| ETS1  | ACTR8      |
| ETS1  | ADA        |
| ETS1  | ADD3       |
| ETS1  | ADNP2      |
| ETS1  | ADPRH      |
| ETS1  | AEBP1      |
| ETS1  | AES        |
| ETS1  | AFF3       |
| ETS1  | AFTPH      |
| ETS1  | AGBL5      |
| ETS1  | AG03       |
| ETS1  | AG04       |
| ETS1  | AGPS       |
| ETS1  | AGTRAP     |
| ETS1  | AIFM1      |
| ETS1  | AIFM2      |
| ETS1  | AIM2       |
| ETS1  | AIP        |
| ETS1  | AKAP13     |

|      |           |
|------|-----------|
| ETS1 | AKIP1     |
| ETS1 | AKIRIN1   |
| ETS1 | AKIRIN2   |
| ETS1 | AKNA      |
| ETS1 | ALAS1     |
| ETS1 | ALDH16A1  |
| ETS1 | ALDH6A1   |
| ETS1 | ALG6      |
| ETS1 | ALKBH3    |
| ETS1 | ALKBH4    |
| ETS1 | ALKBH7    |
| ETS1 | ALOX5AP   |
| ETS1 | ALPK1     |
| ETS1 | AMZ2      |
| ETS1 | ANAPC10   |
| ETS1 | ANAPC15   |
| ETS1 | ANAPC7    |
| ETS1 | ANKRD13A  |
| ETS1 | ANKRD13C  |
| ETS1 | ANKRD13D  |
| ETS1 | ANKRD40   |
| ETS1 | ANKRD44   |
| ETS1 | ANKRD49   |
| ETS1 | ANXA11    |
| ETS1 | ANXA6     |
| ETS1 | AP1B1     |
| ETS1 | APBB1IP   |
| ETS1 | APEH      |
| ETS1 | APLP2     |
| ETS1 | APPBP2    |
| ETS1 | APPL1     |
| ETS1 | ARAF      |
| ETS1 | ARF3      |
| ETS1 | ARF4-AS1  |
| ETS1 | ARHGAP11A |
| ETS1 | ARHGAP25  |
| ETS1 | ARHGAP30  |
| ETS1 | ARHGDIB   |
| ETS1 | ARHGEF1   |
| ETS1 | ARHGEF6   |
| ETS1 | ARHGEF7   |
| ETS1 | ARHGEF9   |
| ETS1 | ARID1A    |
| ETS1 | ARID1B    |
| ETS1 | ARID3A    |
| ETS1 | ARID4B    |
| ETS1 | ARID5A    |
| ETS1 | ARL14EP   |
| ETS1 | ARL2BP    |
| ETS1 | ARL5B     |

|      |           |
|------|-----------|
| ETS1 | ARL8A     |
| ETS1 | ARMC1     |
| ETS1 | ARMT1     |
| ETS1 | ARPC1B    |
| ETS1 | ARPC2     |
| ETS1 | ARPC3     |
| ETS1 | ARPC4     |
| ETS1 | ARPC5     |
| ETS1 | ARRDC1    |
| ETS1 | ASB2      |
| ETS1 | ASB6      |
| ETS1 | ASH1L-AS1 |
| ETS1 | ASPM      |
| ETS1 | ATAD1     |
| ETS1 | ATF6B     |
| ETS1 | ATF7IP    |
| ETS1 | ATM       |
| ETS1 | ATP10D    |
| ETS1 | ATP6V0A1  |
| ETS1 | ATP6V0D1  |
| ETS1 | ATP6V1D   |
| ETS1 | ATP6V1H   |
| ETS1 | ATRX      |
| ETS1 | ATXN7L3B  |
| ETS1 | AUNIP     |
| ETS1 | AURKA     |
| ETS1 | AURKB     |
| ETS1 | AZI2      |
| ETS1 | AZIN1     |
| ETS1 | B3GALNT1  |
| ETS1 | B4GALT1   |
| ETS1 | BABAM1    |
| ETS1 | BAIAP2L1  |
| ETS1 | BASP1     |
| ETS1 | BCAS4     |
| ETS1 | BCL11A    |
| ETS1 | BCL3      |
| ETS1 | BCL7A     |
| ETS1 | BDH2      |
| ETS1 | BECN1     |
| ETS1 | BEX4      |
| ETS1 | BHLHE41   |
| ETS1 | BICD1     |
| ETS1 | BIN1      |
| ETS1 | BIRC3     |
| ETS1 | BIRC5     |
| ETS1 | BLCAP     |
| ETS1 | BLK       |
| ETS1 | BLM       |
| ETS1 | BLNK      |

|      |              |
|------|--------------|
| ETS1 | BLOC1S1      |
| ETS1 | BLOC1S6      |
| ETS1 | BNIP2        |
| ETS1 | BOD1L1       |
| ETS1 | BORCS8-MEF2B |
| ETS1 | BPTF         |
| ETS1 | BRAP         |
| ETS1 | BRD4         |
| ETS1 | BRD7         |
| ETS1 | BRI3         |
| ETS1 | BRI3BP       |
| ETS1 | BRK1         |
| ETS1 | BRX          |
| ETS1 | BTG2         |
| ETS1 | BTK          |
| ETS1 | BUB1         |
| ETS1 | BUB1B        |
| ETS1 | C12orf49     |
| ETS1 | C12orf75     |
| ETS1 | C15orf40     |
| ETS1 | C15orf61     |
| ETS1 | C16orf70     |
| ETS1 | C16orf72     |
| ETS1 | C16orf74     |
| ETS1 | C16orf95     |
| ETS1 | C17orf80     |
| ETS1 | C19orf53     |
| ETS1 | C1D          |
| ETS1 | C1GALT1C1    |
| ETS1 | C2orf49      |
| ETS1 | C3orf67      |
| ETS1 | C4orf3       |
| ETS1 | C6orf106     |
| ETS1 | C6orf62      |
| ETS1 | C6orf99      |
| ETS1 | C7orf50      |
| ETS1 | C9orf16      |
| ETS1 | C9orf85      |
| ETS1 | CAB39L       |
| ETS1 | CACNA1A      |
| ETS1 | CALM1        |
| ETS1 | CALM3        |
| ETS1 | CAND1        |
| ETS1 | CAP1         |
| ETS1 | CAPN1        |
| ETS1 | CAPZB        |
| ETS1 | CARD8        |
| ETS1 | CARF         |
| ETS1 | CARS         |
| ETS1 | CARS2        |

|      |          |
|------|----------|
| ETS1 | CASC4    |
| ETS1 | CASP4    |
| ETS1 | CASP8    |
| ETS1 | CAT      |
| ETS1 | CBFA2T3  |
| ETS1 | CBFB     |
| ETS1 | CBX5     |
| ETS1 | CC2D1A   |
| ETS1 | CCAR1    |
| ETS1 | CCDC106  |
| ETS1 | CCDC107  |
| ETS1 | CCDC167  |
| ETS1 | CCDC34   |
| ETS1 | CCDC69   |
| ETS1 | CCDC88A  |
| ETS1 | CCDC88C  |
| ETS1 | CCM2     |
| ETS1 | CCNB1    |
| ETS1 | CCNB2    |
| ETS1 | CCNDBP1  |
| ETS1 | CCNF     |
| ETS1 | CCNG1    |
| ETS1 | CCNI     |
| ETS1 | CCNL1    |
| ETS1 | CCNY     |
| ETS1 | CD151    |
| ETS1 | CD19     |
| ETS1 | CD2BP2   |
| ETS1 | CD37     |
| ETS1 | CD52     |
| ETS1 | CD53     |
| ETS1 | CD79B    |
| ETS1 | CD81     |
| ETS1 | CD9      |
| ETS1 | CDC20    |
| ETS1 | CDC27    |
| ETS1 | CDC37    |
| ETS1 | CDC40    |
| ETS1 | CDC42SE2 |
| ETS1 | CDK13    |
| ETS1 | CDK19    |
| ETS1 | CDK5RAP2 |
| ETS1 | CDR2     |
| ETS1 | CDV3     |
| ETS1 | CEBPG    |
| ETS1 | CELF1    |
| ETS1 | CENPE    |
| ETS1 | CENPF    |
| ETS1 | CENPN    |
| ETS1 | CENPT    |

|      |        |
|------|--------|
| ETS1 | CEP350 |
| ETS1 | CEP55  |
| ETS1 | CFAP73 |
| ETS1 | CFL1   |
| ETS1 | CGGBP1 |
| ETS1 | CHCHD1 |
| ETS1 | CHCHD7 |
| ETS1 | CHD2   |
| ETS1 | CHD4   |
| ETS1 | CHD8   |
| ETS1 | CHD9   |
| ETS1 | CHFR   |
| ETS1 | CHIC2  |
| ETS1 | CHKB   |
| ETS1 | CHRN1  |
| ETS1 | CHTF8  |
| ETS1 | CHURC1 |
| ETS1 | CIR1   |
| ETS1 | CIZ1   |
| ETS1 | CKAP5  |
| ETS1 | CKS1B  |
| ETS1 | CKS2   |
| ETS1 | CLCN3  |
| ETS1 | CLCN6  |
| ETS1 | CLIC4  |
| ETS1 | CLINT1 |
| ETS1 | CLK3   |
| ETS1 | CLOCK  |
| ETS1 | CLPX   |
| ETS1 | CLTC   |
| ETS1 | CLTCL1 |
| ETS1 | CMAS   |
| ETS1 | CMTM8  |
| ETS1 | CNDP2  |
| ETS1 | CNN2   |
| ETS1 | CNOT10 |
| ETS1 | CNOT11 |
| ETS1 | CNOT6  |
| ETS1 | CNOT7  |
| ETS1 | COA3   |
| ETS1 | COASY  |
| ETS1 | COIL   |
| ETS1 | COMMD2 |
| ETS1 | COMMD4 |
| ETS1 | COMMD6 |
| ETS1 | COPA   |
| ETS1 | COPS6  |
| ETS1 | COQ4   |
| ETS1 | COQ5   |
| ETS1 | COR01A |

|      |          |
|------|----------|
| ETS1 | COTL1    |
| ETS1 | COX14    |
| ETS1 | COX17    |
| ETS1 | COX4I1   |
| ETS1 | COX6B1   |
| ETS1 | COX6C    |
| ETS1 | COX7A2   |
| ETS1 | COX7A2L  |
| ETS1 | COX8A    |
| ETS1 | CPNE5    |
| ETS1 | CPSF6    |
| ETS1 | CREB1    |
| ETS1 | CRIP1    |
| ETS1 | CRLF3    |
| ETS1 | CRNKL1   |
| ETS1 | CSDE1    |
| ETS1 | CSK      |
| ETS1 | CSNK1G2  |
| ETS1 | CSNK2B   |
| ETS1 | CSPP1    |
| ETS1 | CSRP1    |
| ETS1 | CTCF     |
| ETS1 | CTDSP2   |
| ETS1 | CTHRC1   |
| ETS1 | CTSC     |
| ETS1 | CTSH     |
| ETS1 | CUL3     |
| ETS1 | CUTC     |
| ETS1 | CUX1     |
| ETS1 | CWC27    |
| ETS1 | CXCR5    |
| ETS1 | CXorf21  |
| ETS1 | CXorf38  |
| ETS1 | CXorf56  |
| ETS1 | CXXC5    |
| ETS1 | CYB561A3 |
| ETS1 | CYB5B    |
| ETS1 | CYB5D2   |
| ETS1 | CYB5R3   |
| ETS1 | CYBB     |
| ETS1 | CYP2R1   |
| ETS1 | DAAM1    |
| ETS1 | DAP      |
| ETS1 | DAPP1    |
| ETS1 | DARS     |
| ETS1 | DAXX     |
| ETS1 | DBI      |
| ETS1 | DBNL     |
| ETS1 | DCAF11   |
| ETS1 | DCAF16   |

|      |          |
|------|----------|
| ETS1 | DCAF6    |
| ETS1 | DCAF7    |
| ETS1 | DCP1A    |
| ETS1 | DCP2     |
| ETS1 | DCTN3    |
| ETS1 | DDX17    |
| ETS1 | DDX24    |
| ETS1 | DDX3X    |
| ETS1 | DDX49    |
| ETS1 | DDX6     |
| ETS1 | DECR1    |
| ETS1 | DEF6     |
| ETS1 | DEPDC5   |
| ETS1 | DGU0K    |
| ETS1 | DHRS12   |
| ETS1 | DHX16    |
| ETS1 | DHX36    |
| ETS1 | DICER1   |
| ETS1 | DIP2A    |
| ETS1 | DIS3L    |
| ETS1 | DLAT     |
| ETS1 | DMXL1    |
| ETS1 | DNAJB2   |
| ETS1 | DNAJB6   |
| ETS1 | DNAJC27  |
| ETS1 | DNAJC7   |
| ETS1 | DNASE1L1 |
| ETS1 | DNM2     |
| ETS1 | DOCK2    |
| ETS1 | DOCK8    |
| ETS1 | DOK1     |
| ETS1 | DOK3     |
| ETS1 | DPCD     |
| ETS1 | DPY30    |
| ETS1 | DTD2     |
| ETS1 | DUS1L    |
| ETS1 | DUSP2    |
| ETS1 | DUSP23   |
| ETS1 | DYNC1H1  |
| ETS1 | DYNC1I2  |
| ETS1 | DYNLL1   |
| ETS1 | DYNLRB1  |
| ETS1 | DZIP3    |
| ETS1 | E2F4     |
| ETS1 | E2F5     |
| ETS1 | ECH1     |
| ETS1 | ECHS1    |
| ETS1 | ECT2     |
| ETS1 | EDEM2    |
| ETS1 | EEF2     |



|      |            |
|------|------------|
| ETS1 | EFHC1      |
| ETS1 | EGR2       |
| ETS1 | EHD1       |
| ETS1 | EHMT1      |
| ETS1 | EID1       |
| ETS1 | EID3       |
| ETS1 | EIF2A      |
| ETS1 | EIF2AK2    |
| ETS1 | EIF2B1     |
| ETS1 | EIF2D      |
| ETS1 | EIF3A      |
| ETS1 | EIF3E      |
| ETS1 | EIF3F      |
| ETS1 | EIF3H      |
| ETS1 | EIF3L      |
| ETS1 | EIF4B      |
| ETS1 | EIF4G2     |
| ETS1 | EIF5       |
| ETS1 | ELAC1      |
| ETS1 | ELF1       |
| ETS1 | ELK3       |
| ETS1 | ELK4       |
| ETS1 | ELP5       |
| ETS1 | ENDOG      |
| ETS1 | ENOPH1     |
| ETS1 | ENSA       |
| ETS1 | ENTPD3-AS1 |
| ETS1 | ENTPD4     |
| ETS1 | ENY2       |
| ETS1 | EPC1       |
| ETS1 | EPN1       |
| ETS1 | ERBIN      |
| ETS1 | ERMARD     |
| ETS1 | ERP29      |
| ETS1 | ESR2       |
| ETS1 | ETFA       |
| ETS1 | ETFB       |
| ETS1 | ETS1       |
| ETS1 | EVC2       |
| ETS1 | EVI2A      |
| ETS1 | EVI2B      |
| ETS1 | EVL        |
| ETS1 | EWSR1      |
| ETS1 | EXOC1      |
| ETS1 | EXOC7      |
| ETS1 | EZR        |
| ETS1 | FADS3      |
| ETS1 | FAHD2A     |
| ETS1 | FAM107B    |
| ETS1 | FAM111B    |

|      |           |
|------|-----------|
| ETS1 | FAM120C   |
| ETS1 | FAM172A   |
| ETS1 | FAM192A   |
| ETS1 | FAM204A   |
| ETS1 | FAM49B    |
| ETS1 | FAM76B    |
| ETS1 | FAM83D    |
| ETS1 | FAM96A    |
| ETS1 | FAM96B    |
| ETS1 | FARS2     |
| ETS1 | FARSB     |
| ETS1 | FBP1      |
| ETS1 | FBX038    |
| ETS1 | FBX044    |
| ETS1 | FBX09     |
| ETS1 | FCRLA     |
| ETS1 | FDXR      |
| ETS1 | FEZ2      |
| ETS1 | FGD3      |
| ETS1 | FGFR10P2  |
| ETS1 | FKBP1A    |
| ETS1 | FKBP3     |
| ETS1 | FKBP5     |
| ETS1 | FKBP8     |
| ETS1 | FLI1      |
| ETS1 | FLVCR1    |
| ETS1 | FNBP4     |
| ETS1 | FRYL      |
| ETS1 | FUT8      |
| ETS1 | FXR1      |
| ETS1 | G3BP2     |
| ETS1 | GABARAPL2 |
| ETS1 | GAK       |
| ETS1 | GAPDH     |
| ETS1 | GATAD2A   |
| ETS1 | GCNT2     |
| ETS1 | GCSAM     |
| ETS1 | GDI1      |
| ETS1 | GDI2      |
| ETS1 | GEMIN7    |
| ETS1 | GFOD1     |
| ETS1 | GFPT1     |
| ETS1 | GGA2      |
| ETS1 | GGA3      |
| ETS1 | GGNBP2    |
| ETS1 | GIGYF2    |
| ETS1 | GIN1      |
| ETS1 | GIT2      |
| ETS1 | GLRX5     |
| ETS1 | GMCL1     |

|      |          |
|------|----------|
| ETS1 | GMFG     |
| ETS1 | GMIP     |
| ETS1 | GMPR2    |
| ETS1 | GNA13    |
| ETS1 | GNAI2    |
| ETS1 | GNG5     |
| ETS1 | GNPTAB   |
| ETS1 | GOLGA3   |
| ETS1 | GON4L    |
| ETS1 | GOSR1    |
| ETS1 | GPANK1   |
| ETS1 | GPATCH1  |
| ETS1 | GPATCH11 |
| ETS1 | GPATCH2  |
| ETS1 | GPATCH2L |
| ETS1 | GPN3     |
| ETS1 | GPR155   |
| ETS1 | GPSM3    |
| ETS1 | GRAMD1C  |
| ETS1 | GRAP     |
| ETS1 | GRAPL    |
| ETS1 | GRB2     |
| ETS1 | GRIPAP1  |
| ETS1 | GRK2     |
| ETS1 | GRK3     |
| ETS1 | GSDMD    |
| ETS1 | GSK3A    |
| ETS1 | GSK3B    |
| ETS1 | GSKIP    |
| ETS1 | GSS      |
| ETS1 | GSTZ1    |
| ETS1 | GTDC1    |
| ETS1 | GTF2A1   |
| ETS1 | GTF2B    |
| ETS1 | GTF2F1   |
| ETS1 | GTF2I    |
| ETS1 | GTSE1    |
| ETS1 | H1F0     |
| ETS1 | H2AFV    |
| ETS1 | H3F3A    |
| ETS1 | HADHA    |
| ETS1 | HADHB    |
| ETS1 | HCK      |
| ETS1 | HCLS1    |
| ETS1 | HDAC1    |
| ETS1 | HDAC7    |
| ETS1 | HDAC8    |
| ETS1 | HDDC2    |
| ETS1 | HDGF     |
| ETS1 | HEBP2    |

|      |           |
|------|-----------|
| ETS1 | HECTD1    |
| ETS1 | HELQ      |
| ETS1 | HERC2     |
| ETS1 | HERC4     |
| ETS1 | HGSNAT    |
| ETS1 | HHEX      |
| ETS1 | HIBADH    |
| ETS1 | HIBCH     |
| ETS1 | HIGD2A    |
| ETS1 | HINT1     |
| ETS1 | HINT3     |
| ETS1 | HIRIP3    |
| ETS1 | HJURP     |
| ETS1 | HLA-DMA   |
| ETS1 | HLA-DMB   |
| ETS1 | HMG20B    |
| ETS1 | HMGB1     |
| ETS1 | HMGN1     |
| ETS1 | HMGN2     |
| ETS1 | HMGN3     |
| ETS1 | HMGXB4    |
| ETS1 | HMMR      |
| ETS1 | HNRNPA1   |
| ETS1 | HNRNPA2B1 |
| ETS1 | HNRNPA3   |
| ETS1 | HNRNPD    |
| ETS1 | HNRNPK    |
| ETS1 | HNRNPM    |
| ETS1 | HNRNPUL2  |
| ETS1 | HP1BP3    |
| ETS1 | HPS3      |
| ETS1 | HRK       |
| ETS1 | HS2ST1    |
| ETS1 | HSBP1     |
| ETS1 | HSCB      |
| ETS1 | HSD17B10  |
| ETS1 | HSD17B11  |
| ETS1 | HSPA4     |
| ETS1 | HYPK      |
| ETS1 | IBTK      |
| ETS1 | ICE2      |
| ETS1 | IDH3G     |
| ETS1 | IDS       |
| ETS1 | IER2      |
| ETS1 | IFI16     |
| ETS1 | IFI27L2   |
| ETS1 | IFNGR2    |
| ETS1 | IFNLR1    |
| ETS1 | IFT43     |
| ETS1 | IFT52     |

|      |           |
|------|-----------|
| ETS1 | IGBP1     |
| ETS1 | IKZF1     |
| ETS1 | IKZF3     |
| ETS1 | IL10RA    |
| ETS1 | IL16      |
| ETS1 | ILK       |
| ETS1 | INIP      |
| ETS1 | IN080C    |
| ETS1 | INTS10    |
| ETS1 | INTS6L    |
| ETS1 | IP6K2     |
| ETS1 | IQGAP1    |
| ETS1 | IQGAP2    |
| ETS1 | IRF3      |
| ETS1 | IRF8      |
| ETS1 | ISCA2     |
| ETS1 | ISG20     |
| ETS1 | IST1      |
| ETS1 | ITGAE     |
| ETS1 | ITGAL     |
| ETS1 | ITGB1     |
| ETS1 | ITGB3BP   |
| ETS1 | ITPK1     |
| ETS1 | ITPKA     |
| ETS1 | ITSN2     |
| ETS1 | JADE2     |
| ETS1 | JAK1      |
| ETS1 | JAK2      |
| ETS1 | JRKL      |
| ETS1 | JUN       |
| ETS1 | KBTBD8    |
| ETS1 | KCNA3     |
| ETS1 | KCNMB3    |
| ETS1 | KCTD20    |
| ETS1 | KCTD9     |
| ETS1 | KDM2A     |
| ETS1 | KDM4C     |
| ETS1 | KHDRBS1   |
| ETS1 | KIAA0040  |
| ETS1 | KIAA0232  |
| ETS1 | KIAA0319L |
| ETS1 | KIAA1217  |
| ETS1 | KIAA1841  |
| ETS1 | KIF18B    |
| ETS1 | KIF20B    |
| ETS1 | KIF22     |
| ETS1 | KIF23     |
| ETS1 | KIF5B     |
| ETS1 | KIF9      |
| ETS1 | KIFAP3    |

|      |           |
|------|-----------|
| ETS1 | KLF2      |
| ETS1 | KLHL14    |
| ETS1 | KLHL5     |
| ETS1 | KMT2A     |
| ETS1 | KMT2E     |
| ETS1 | KMT2E-AS1 |
| ETS1 | KNSTRN    |
| ETS1 | KPNA2     |
| ETS1 | KPNA5     |
| ETS1 | KPTN      |
| ETS1 | KRAS      |
| ETS1 | KRCC1     |
| ETS1 | KTN1      |
| ETS1 | LACTB2    |
| ETS1 | LAMTOR2   |
| ETS1 | LAMTOR4   |
| ETS1 | LAMTOR5   |
| ETS1 | LAPTM5    |
| ETS1 | LBR       |
| ETS1 | LCMT1     |
| ETS1 | LCORL     |
| ETS1 | LCP1      |
| ETS1 | LDHB      |
| ETS1 | LDLRAD4   |
| ETS1 | LENG1     |
| ETS1 | LE01      |
| ETS1 | LEPROT    |
| ETS1 | LHFPL2    |
| ETS1 | LIMD2     |
| ETS1 | LIMS1     |
| ETS1 | LINC00426 |
| ETS1 | LINC00467 |
| ETS1 | LINC00667 |
| ETS1 | LINC01003 |
| ETS1 | LMBRD2    |
| ETS1 | LM07      |
| ETS1 | LMTK3     |
| ETS1 | LPIN1     |
| ETS1 | LRBA      |
| ETS1 | LRR1      |
| ETS1 | LSG1      |
| ETS1 | LSM10     |
| ETS1 | LSM12     |
| ETS1 | LSM14A    |
| ETS1 | LSM3      |
| ETS1 | LSM5      |
| ETS1 | LSM8      |
| ETS1 | LSP1      |
| ETS1 | LTB       |
| ETS1 | LTN1      |

|      |          |
|------|----------|
| ETS1 | LY96     |
| ETS1 | LYN      |
| ETS1 | LYPLA2   |
| ETS1 | LYRM2    |
| ETS1 | MACROD1  |
| ETS1 | MAD1L1   |
| ETS1 | MAD2L1BP |
| ETS1 | MADD     |
| ETS1 | MAGED2   |
| ETS1 | MAGEF1   |
| ETS1 | MAN2A2   |
| ETS1 | MAP1LC3B |
| ETS1 | MAP3K12  |
| ETS1 | MAP3K4   |
| ETS1 | MAP7D1   |
| ETS1 | MAPRE1   |
| ETS1 | MARCH6   |
| ETS1 | MARCH7   |
| ETS1 | MBD4     |
| ETS1 | MBNL1    |
| ETS1 | MCL1     |
| ETS1 | MDH1     |
| ETS1 | MDH2     |
| ETS1 | MDM4     |
| ETS1 | MED1     |
| ETS1 | MED11    |
| ETS1 | MED12L   |
| ETS1 | MED13    |
| ETS1 | MED30    |
| ETS1 | MED6     |
| ETS1 | MEF2A    |
| ETS1 | MEF2C    |
| ETS1 | MEN1     |
| ETS1 | MET      |
| ETS1 | METTTL23 |
| ETS1 | MFAP1    |
| ETS1 | MFSD11   |
| ETS1 | MFSD8    |
| ETS1 | MGA      |
| ETS1 | MGME1    |
| ETS1 | MIA3     |
| ETS1 | MICAL3   |
| ETS1 | MICU2    |
| ETS1 | MID1IP1  |
| ETS1 | MIEN1    |
| ETS1 | MIER2    |
| ETS1 | MIF4GD   |
| ETS1 | MKRN1    |
| ETS1 | MLH1     |
| ETS1 | MLH3     |

|      |         |
|------|---------|
| ETS1 | MLYCD   |
| ETS1 | MMADHC  |
| ETS1 | MMD     |
| ETS1 | MME     |
| ETS1 | MOB1A   |
| ETS1 | MOB2    |
| ETS1 | MOB3A   |
| ETS1 | MOV10   |
| ETS1 | MPLKIP  |
| ETS1 | MRPL23  |
| ETS1 | MRPL27  |
| ETS1 | MRPL35  |
| ETS1 | MRPL40  |
| ETS1 | MRPL43  |
| ETS1 | MRPL51  |
| ETS1 | MRPS10  |
| ETS1 | MRPS18B |
| ETS1 | MRPS33  |
| ETS1 | MRPS6   |
| ETS1 | MRPS9   |
| ETS1 | MS4A1   |
| ETS1 | MSI2    |
| ETS1 | MSL3    |
| ETS1 | MSMP    |
| ETS1 | MSN     |
| ETS1 | MTDH    |
| ETS1 | MTERF4  |
| ETS1 | MTF2    |
| ETS1 | MTIF3   |
| ETS1 | MTPN    |
| ETS1 | MTRF1   |
| ETS1 | MYBL1   |
| ETS1 | MYBL2   |
| ETS1 | MYEF2   |
| ETS1 | MYH9    |
| ETS1 | MYL12A  |
| ETS1 | MYL12B  |
| ETS1 | MYL6B   |
| ETS1 | MYO1G   |
| ETS1 | MYO7B   |
| ETS1 | MZT1    |
| ETS1 | MZT2A   |
| ETS1 | N4BP2L2 |
| ETS1 | NAA15   |
| ETS1 | NAA30   |
| ETS1 | NACC1   |
| ETS1 | NADK    |
| ETS1 | NAF1    |
| ETS1 | NAPEPLD |
| ETS1 | NARF    |



|      |           |
|------|-----------|
| ETS1 | NCAPH     |
| ETS1 | NCBP2     |
| ETS1 | NCF1      |
| ETS1 | NCKAP1L   |
| ETS1 | NCKIPSD   |
| ETS1 | NCOA2     |
| ETS1 | NCOA3     |
| ETS1 | NCOA4     |
| ETS1 | NCOR2     |
| ETS1 | NDC80     |
| ETS1 | NDE1      |
| ETS1 | NDUFA1    |
| ETS1 | NDUFA10   |
| ETS1 | NDUFA12   |
| ETS1 | NDUFA2    |
| ETS1 | NDUFA4    |
| ETS1 | NDUFA8    |
| ETS1 | NDUFAF3   |
| ETS1 | NDUFAF5   |
| ETS1 | NDUFAF7   |
| ETS1 | NDUFB3    |
| ETS1 | NDUFB4    |
| ETS1 | NDUFB5    |
| ETS1 | NDUFC1    |
| ETS1 | NDUFS2    |
| ETS1 | NDUFS5    |
| ETS1 | NDUFV2    |
| ETS1 | NDUFV3    |
| ETS1 | NEDD8     |
| ETS1 | NEIL1     |
| ETS1 | NEK2      |
| ETS1 | NEK4      |
| ETS1 | NEK8      |
| ETS1 | NEK9      |
| ETS1 | NET1      |
| ETS1 | NINJ1     |
| ETS1 | NIPA1     |
| ETS1 | NIPSNAP3A |
| ETS1 | NKTR      |
| ETS1 | NMT2      |
| ETS1 | NNT       |
| ETS1 | NOA1      |
| ETS1 | NONO      |
| ETS1 | NOSIP     |
| ETS1 | NPEPPS    |
| ETS1 | NR2C2     |
| ETS1 | NRSN2     |
| ETS1 | NSD1      |
| ETS1 | NSMCE1    |
| ETS1 | NSUN3     |

|      |          |
|------|----------|
| ETS1 | NSUN5    |
| ETS1 | NT5C2    |
| ETS1 | NUAK2    |
| ETS1 | NUDCD2   |
| ETS1 | NUDT16L1 |
| ETS1 | NUDT2    |
| ETS1 | NUDT21   |
| ETS1 | NUDT3    |
| ETS1 | NUDT5    |
| ETS1 | NUF2     |
| ETS1 | NUP155   |
| ETS1 | NUP37    |
| ETS1 | NUPL2    |
| ETS1 | OARD1    |
| ETS1 | OAS2     |
| ETS1 | OAZ1     |
| ETS1 | OAZ2     |
| ETS1 | OCIAD2   |
| ETS1 | ODF2     |
| ETS1 | ODF2L    |
| ETS1 | OFD1     |
| ETS1 | OMA1     |
| ETS1 | ORAI2    |
| ETS1 | ORC3     |
| ETS1 | OSBPL10  |
| ETS1 | OSBPL11  |
| ETS1 | OSBPL3   |
| ETS1 | OSBPL8   |
| ETS1 | OSBPL9   |
| ETS1 | OST4     |
| ETS1 | OSTF1    |
| ETS1 | OTUD5    |
| ETS1 | OTUD7A   |
| ETS1 | OTULIN   |
| ETS1 | OXA1L    |
| ETS1 | P2RX5    |
| ETS1 | PAFAH1B1 |
| ETS1 | PAG1     |
| ETS1 | PAGE5    |
| ETS1 | PAIP2    |
| ETS1 | PAK2     |
| ETS1 | PAN3     |
| ETS1 | PAPSS1   |
| ETS1 | PARL     |
| ETS1 | PARN     |
| ETS1 | PARP1    |
| ETS1 | PARP11   |
| ETS1 | PARPBP   |
| ETS1 | PARVG    |
| ETS1 | PAX5     |

|      |         |
|------|---------|
| ETS1 | PBLD    |
| ETS1 | PCED1B  |
| ETS1 | PCF11   |
| ETS1 | PCIF1   |
| ETS1 | PCM1    |
| ETS1 | PCMTD2  |
| ETS1 | PCNT    |
| ETS1 | PCSK7   |
| ETS1 | PCYT2   |
| ETS1 | PDCD10  |
| ETS1 | PDCD2   |
| ETS1 | PDCD7   |
| ETS1 | PDE4D   |
| ETS1 | PDHB    |
| ETS1 | PDIK1L  |
| ETS1 | PDK2    |
| ETS1 | PDLIM1  |
| ETS1 | PDS5B   |
| ETS1 | PDZD11  |
| ETS1 | PECAM1  |
| ETS1 | PET117  |
| ETS1 | PEX2    |
| ETS1 | PEX3    |
| ETS1 | PFDN1   |
| ETS1 | PFN1    |
| ETS1 | PGLS    |
| ETS1 | PHF12   |
| ETS1 | PHF14   |
| ETS1 | PHF19   |
| ETS1 | PHF3    |
| ETS1 | PHF6    |
| ETS1 | PIF1    |
| ETS1 | PIGF    |
| ETS1 | PIGN    |
| ETS1 | PIGT    |
| ETS1 | PIGZ    |
| ETS1 | PIH1D1  |
| ETS1 | PIK3C3  |
| ETS1 | PIK3CD  |
| ETS1 | PIM1    |
| ETS1 | PJA2    |
| ETS1 | PKIB    |
| ETS1 | PKIG    |
| ETS1 | PLA2G15 |
| ETS1 | PLEKHA3 |
| ETS1 | PLEKHF2 |
| ETS1 | PLEKHG1 |
| ETS1 | PLK1    |
| ETS1 | PLPP5   |
| ETS1 | PLXNB2  |

|      |          |
|------|----------|
| ETS1 | PMF1     |
| ETS1 | PMPCB    |
| ETS1 | PMVK     |
| ETS1 | PNISR    |
| ETS1 | PNKD     |
| ETS1 | PNKP     |
| ETS1 | PNN      |
| ETS1 | PN01     |
| ETS1 | PNPLA8   |
| ETS1 | PNRC2    |
| ETS1 | POC5     |
| ETS1 | POLD4    |
| ETS1 | POLE     |
| ETS1 | POLR1D   |
| ETS1 | POLR2B   |
| ETS1 | POLR2G   |
| ETS1 | POLR3GL  |
| ETS1 | POU2F1   |
| ETS1 | POU2F2   |
| ETS1 | PPARD    |
| ETS1 | PPCS     |
| ETS1 | PPHLN1   |
| ETS1 | PPID     |
| ETS1 | PPIG     |
| ETS1 | PPIL3    |
| ETS1 | PPIP5K2  |
| ETS1 | PPM1A    |
| ETS1 | PPP1CA   |
| ETS1 | PPP1CB   |
| ETS1 | PPP1CC   |
| ETS1 | PPP1R12A |
| ETS1 | PPP1R14A |
| ETS1 | PPP1R18  |
| ETS1 | PPP1R37  |
| ETS1 | PPP1R7   |
| ETS1 | PPP2CA   |
| ETS1 | PPP2R1A  |
| ETS1 | PPP2R1B  |
| ETS1 | PPP2R5A  |
| ETS1 | PPP2R5C  |
| ETS1 | PPP2R5E  |
| ETS1 | PPP4C    |
| ETS1 | PPP4R3B  |
| ETS1 | PPP6C    |
| ETS1 | PRDM15   |
| ETS1 | PRDM2    |
| ETS1 | PRDX6    |
| ETS1 | PREP     |
| ETS1 | PRKACB   |
| ETS1 | PRKAR1A  |

|      |           |
|------|-----------|
| ETS1 | PRKCD     |
| ETS1 | PRKRIP1   |
| ETS1 | PRMT2     |
| ETS1 | PRPF38A   |
| ETS1 | PRPF40A   |
| ETS1 | PRPF8     |
| ETS1 | PRR11     |
| ETS1 | PRR13     |
| ETS1 | PRR5      |
| ETS1 | PRRC2B    |
| ETS1 | PRRG4     |
| ETS1 | PSD4      |
| ETS1 | PSMA4     |
| ETS1 | PSMB2     |
| ETS1 | PSMB3     |
| ETS1 | PSMB8     |
| ETS1 | PSMB9     |
| ETS1 | PSMD13    |
| ETS1 | PSMD4     |
| ETS1 | PSMF1     |
| ETS1 | PSMG1     |
| ETS1 | PSPC1     |
| ETS1 | PSPH      |
| ETS1 | PTEN      |
| ETS1 | PTMS      |
| ETS1 | PTPN1     |
| ETS1 | PTPN18    |
| ETS1 | PTPN2     |
| ETS1 | PTPRA     |
| ETS1 | PTPRC     |
| ETS1 | PTPRJ     |
| ETS1 | PTRHD1    |
| ETS1 | PTTG1     |
| ETS1 | PUS10     |
| ETS1 | PXK       |
| ETS1 | PYGB      |
| ETS1 | PYM1      |
| ETS1 | PYURF     |
| ETS1 | QARS      |
| ETS1 | RAB11FIP1 |
| ETS1 | RAB11FIP4 |
| ETS1 | RAB18     |
| ETS1 | RAB1B     |
| ETS1 | RAB22A    |
| ETS1 | RAB30     |
| ETS1 | RAB30-AS1 |
| ETS1 | RAB3GAP1  |
| ETS1 | RAB3GAP2  |
| ETS1 | RAB4A     |
| ETS1 | RABEP1    |

|      |           |
|------|-----------|
| ETS1 | RABGAP1L  |
| ETS1 | RAC2      |
| ETS1 | RAD21     |
| ETS1 | RAD51B    |
| ETS1 | RALB      |
| ETS1 | RALBP1    |
| ETS1 | RALGPS2   |
| ETS1 | RANGAP1   |
| ETS1 | RAP1A     |
| ETS1 | RAP1B     |
| ETS1 | RAP2C     |
| ETS1 | RASAL3    |
| ETS1 | RASGEF1B  |
| ETS1 | RASGRP2   |
| ETS1 | RASGRP3   |
| ETS1 | RASSF6    |
| ETS1 | RB1       |
| ETS1 | RB1CC1    |
| ETS1 | RBCK1     |
| ETS1 | RBL2      |
| ETS1 | RBM17     |
| ETS1 | RBM22     |
| ETS1 | RBM26-AS1 |
| ETS1 | RBM3      |
| ETS1 | RBM38     |
| ETS1 | RBM39     |
| ETS1 | RBM4B     |
| ETS1 | RBM5      |
| ETS1 | RBX1      |
| ETS1 | RCBTB2    |
| ETS1 | RCN1      |
| ETS1 | RCOR3     |
| ETS1 | RCSD1     |
| ETS1 | REEP4     |
| ETS1 | RELA      |
| ETS1 | REPIN1    |
| ETS1 | RERE      |
| ETS1 | REST      |
| ETS1 | RFTN1     |
| ETS1 | RFX1      |
| ETS1 | RFX7      |
| ETS1 | RFXANK    |
| ETS1 | RGS13     |
| ETS1 | RGS19     |
| ETS1 | RHBDF2    |
| ETS1 | RHOA      |
| ETS1 | RHOB      |
| ETS1 | RHOQ      |
| ETS1 | RIOK3     |
| ETS1 | RLF       |

|      |            |
|------|------------|
| ETS1 | RMDN1      |
| ETS1 | RMND5B     |
| ETS1 | RNF10      |
| ETS1 | RNF114     |
| ETS1 | RNF130     |
| ETS1 | RNF14      |
| ETS1 | RNF144B    |
| ETS1 | RNF170     |
| ETS1 | RNF19A     |
| ETS1 | RNF26      |
| ETS1 | RNF34      |
| ETS1 | RNF7       |
| ETS1 | RNFT2      |
| ETS1 | RNPEPL1    |
| ETS1 | ROCK1      |
| ETS1 | ROM01      |
| ETS1 | RP2        |
| ETS1 | RPL15      |
| ETS1 | RPL28      |
| ETS1 | RPL39L     |
| ETS1 | RPL6       |
| ETS1 | RPL8       |
| ETS1 | RPS24      |
| ETS1 | RPS4X      |
| ETS1 | RPUSD3     |
| ETS1 | RRM2B      |
| ETS1 | RSRC2      |
| ETS1 | RTF1       |
| ETS1 | RTN4IP1    |
| ETS1 | RTP4       |
| ETS1 | S100A10    |
| ETS1 | S1PR4      |
| ETS1 | SAFB2      |
| ETS1 | SAMHD1     |
| ETS1 | SASH3      |
| ETS1 | SAT1       |
| ETS1 | SBF2-AS1   |
| ETS1 | SCAF11     |
| ETS1 | SCAMP1-AS1 |
| ETS1 | SCAMP2     |
| ETS1 | SCLT1      |
| ETS1 | SDHB       |
| ETS1 | SDHC       |
| ETS1 | SEC14L1    |
| ETS1 | SEC23A     |
| ETS1 | SECISBP2L  |
| ETS1 | SEL1L3     |
| ETS1 | SELL       |
| ETS1 | SELPLG     |
| ETS1 | SEPT2      |

|      |          |
|------|----------|
| ETS1 | SEPT6    |
| ETS1 | SEPT9    |
| ETS1 | SERF2    |
| ETS1 | SERINC3  |
| ETS1 | SERTAD3  |
| ETS1 | SETD2    |
| ETS1 | SETDB2   |
| ETS1 | SETX     |
| ETS1 | SF3B1    |
| ETS1 | SFPQ     |
| ETS1 | SG02     |
| ETS1 | SGSM3    |
| ETS1 | SH2B2    |
| ETS1 | SH3BGRL  |
| ETS1 | SH3KBP1  |
| ETS1 | SH3TC1   |
| ETS1 | SHCBP1   |
| ETS1 | SHF      |
| ETS1 | SHKBP1   |
| ETS1 | SHOC2    |
| ETS1 | SIPA1    |
| ETS1 | SIRT1    |
| ETS1 | SIRT6    |
| ETS1 | SIT1     |
| ETS1 | SKAP2    |
| ETS1 | SKP1     |
| ETS1 | SLC16A6  |
| ETS1 | SLC22A5  |
| ETS1 | SLC25A13 |
| ETS1 | SLC25A5  |
| ETS1 | SLC2A5   |
| ETS1 | SLC30A6  |
| ETS1 | SLC35A1  |
| ETS1 | SLC35B4  |
| ETS1 | SLC35C2  |
| ETS1 | SLC35G2  |
| ETS1 | SLC43A2  |
| ETS1 | SLC44A2  |
| ETS1 | SLC4A1AP |
| ETS1 | SLC8B1   |
| ETS1 | SLC9A3R1 |
| ETS1 | SLTM     |
| ETS1 | SLU7     |
| ETS1 | SMAP1    |
| ETS1 | SMAP2    |
| ETS1 | SMARCA2  |
| ETS1 | SMARCA5  |
| ETS1 | SMARCC2  |
| ETS1 | SMC1A    |
| ETS1 | SMCHD1   |



|      |         |
|------|---------|
| ETS1 | SMDT1   |
| ETS1 | SMIM14  |
| ETS1 | SMIM19  |
| ETS1 | SMU1    |
| ETS1 | SMUG1   |
| ETS1 | SMYD4   |
| ETS1 | SNAP23  |
| ETS1 | SNAPIN  |
| ETS1 | SNF8    |
| ETS1 | SNHG10  |
| ETS1 | SNRNP35 |
| ETS1 | SNRNP40 |
| ETS1 | SNRPB2  |
| ETS1 | SNRPN   |
| ETS1 | SNTA1   |
| ETS1 | SNTB2   |
| ETS1 | SNW1    |
| ETS1 | SNX1    |
| ETS1 | SNX10   |
| ETS1 | SNX2    |
| ETS1 | SNX25   |
| ETS1 | SNX3    |
| ETS1 | SNX5    |
| ETS1 | S0BP    |
| ETS1 | S0RL1   |
| ETS1 | S0X4    |
| ETS1 | SP100   |
| ETS1 | SP110   |
| ETS1 | SPAG7   |
| ETS1 | SPATS2L |
| ETS1 | SPEN    |
| ETS1 | SPG7    |
| ETS1 | SPHK2   |
| ETS1 | SPN     |
| ETS1 | SPRYD7  |
| ETS1 | SPTBN1  |
| ETS1 | SRP14   |
| ETS1 | SS18    |
| ETS1 | SSH2    |
| ETS1 | SSU72   |
| ETS1 | ST13    |
| ETS1 | ST3GAL2 |
| ETS1 | ST3GAL5 |
| ETS1 | ST6GAL1 |
| ETS1 | STAG2   |
| ETS1 | STAM    |
| ETS1 | STAP1   |
| ETS1 | STARD7  |
| ETS1 | STAT5B  |
| ETS1 | STIM2   |

|      |          |
|------|----------|
| ETS1 | STK11IP  |
| ETS1 | STK25    |
| ETS1 | STK38    |
| ETS1 | STRN3    |
| ETS1 | STT3B    |
| ETS1 | STUB1    |
| ETS1 | STX7     |
| ETS1 | STX8     |
| ETS1 | STXBP2   |
| ETS1 | SUGP1    |
| ETS1 | SUM01    |
| ETS1 | SUN2     |
| ETS1 | SUSD3    |
| ETS1 | SUSD6    |
| ETS1 | SVBP     |
| ETS1 | SWAP70   |
| ETS1 | SWI5     |
| ETS1 | SYAP1    |
| ETS1 | SYK      |
| ETS1 | SYNE2    |
| ETS1 | SYNE3    |
| ETS1 | SYPL1    |
| ETS1 | SYT17    |
| ETS1 | SYTL2    |
| ETS1 | TAB1     |
| ETS1 | TACC1    |
| ETS1 | TACC3    |
| ETS1 | TAF15    |
| ETS1 | TAF1B    |
| ETS1 | TAF2     |
| ETS1 | TAF7     |
| ETS1 | TAF8     |
| ETS1 | TAGAP    |
| ETS1 | TANK     |
| ETS1 | TAOK1    |
| ETS1 | TAOK3    |
| ETS1 | TARDBP   |
| ETS1 | TARS2    |
| ETS1 | TAX1BP1  |
| ETS1 | TAX1BP3  |
| ETS1 | TBC1D1   |
| ETS1 | TBC1D10C |
| ETS1 | TBC1D23  |
| ETS1 | TBC1D7   |
| ETS1 | TBCC     |
| ETS1 | TBCEL    |
| ETS1 | TBCK     |
| ETS1 | TCAIM    |
| ETS1 | TCEA1    |
| ETS1 | TCF3     |

|      |             |
|------|-------------|
| ETS1 | TCF4        |
| ETS1 | TCFL5       |
| ETS1 | TCHP        |
| ETS1 | TCIRG1      |
| ETS1 | TCL1A       |
| ETS1 | TCP11L2     |
| ETS1 | TDP2        |
| ETS1 | TECPR1      |
| ETS1 | TEFM        |
| ETS1 | TEN1        |
| ETS1 | TERF2IP     |
| ETS1 | TFAP4       |
| ETS1 | TFEB        |
| ETS1 | TFPT        |
| ETS1 | TGDS        |
| ETS1 | THAP3       |
| ETS1 | THAP7-AS1   |
| ETS1 | THG1L       |
| ETS1 | THOC2       |
| ETS1 | THOC7       |
| ETS1 | THUMPD3     |
| ETS1 | THUMPD3-AS1 |
| ETS1 | THYN1       |
| ETS1 | TIFA        |
| ETS1 | TIGAR       |
| ETS1 | TIMM23      |
| ETS1 | TLDC1       |
| ETS1 | TLE4        |
| ETS1 | TLK1        |
| ETS1 | TLK2        |
| ETS1 | TLN1        |
| ETS1 | TM2D1       |
| ETS1 | TM7SF3      |
| ETS1 | TMA7        |
| ETS1 | TMC6        |
| ETS1 | TMEM14C     |
| ETS1 | TMEM154     |
| ETS1 | TMEM156     |
| ETS1 | TMEM205     |
| ETS1 | TMEM214     |
| ETS1 | TMEM242     |
| ETS1 | TMEM243     |
| ETS1 | TMEM248     |
| ETS1 | TMEM256     |
| ETS1 | TMEM263     |
| ETS1 | TMEM8A      |
| ETS1 | TMF1        |
| ETS1 | TMSB10      |
| ETS1 | TMSB4X      |
| ETS1 | TNFRSF13C   |

|      |              |
|------|--------------|
| ETS1 | TNP01        |
| ETS1 | TNRC6A       |
| ETS1 | TOB2         |
| ETS1 | TOMM7        |
| ETS1 | TOMM70       |
| ETS1 | TOP1         |
| ETS1 | TOP2A        |
| ETS1 | TOP3B        |
| ETS1 | TOR1AIP1     |
| ETS1 | TOR1AIP2     |
| ETS1 | TOX          |
| ETS1 | TOX4         |
| ETS1 | TP53BP2      |
| ETS1 | TPCN1        |
| ETS1 | TPGS1        |
| ETS1 | TPM3         |
| ETS1 | TPM4         |
| ETS1 | TPX2         |
| ETS1 | TRAF3IP2     |
| ETS1 | TRAF3IP2-AS1 |
| ETS1 | TRAFD1       |
| ETS1 | TRAK1        |
| ETS1 | TRANK1       |
| ETS1 | TRAPPC1      |
| ETS1 | TRIB2        |
| ETS1 | TRIM14       |
| ETS1 | TRIM26       |
| ETS1 | TRIM32       |
| ETS1 | TRIM38       |
| ETS1 | TRIM52       |
| ETS1 | TRIOBP       |
| ETS1 | TRMT2B       |
| ETS1 | TRPM7        |
| ETS1 | TSC22D3      |
| ETS1 | TSC22D4      |
| ETS1 | TSNAX        |
| ETS1 | TSP0         |
| ETS1 | TSTD1        |
| ETS1 | TTC3         |
| ETS1 | TTC37        |
| ETS1 | TTLL5        |
| ETS1 | TTN          |
| ETS1 | TUBA1A       |
| ETS1 | TUBA4A       |
| ETS1 | TWF1         |
| ETS1 | TWF2         |
| ETS1 | TXN2         |
| ETS1 | TXNDC9       |
| ETS1 | TYW5         |
| ETS1 | UBA1         |

|      |           |
|------|-----------|
| ETS1 | UBA52     |
| ETS1 | UBALD2    |
| ETS1 | UBE2D2    |
| ETS1 | UBE2E1    |
| ETS1 | UBE2G1    |
| ETS1 | UBE2J1    |
| ETS1 | UBE2J2    |
| ETS1 | UBE2Q1    |
| ETS1 | UBE2R2    |
| ETS1 | UBE2S     |
| ETS1 | UBE3A     |
| ETS1 | UBE3B     |
| ETS1 | UBL5      |
| ETS1 | UBL7      |
| ETS1 | UBL7-AS1  |
| ETS1 | UBN2      |
| ETS1 | UBR1      |
| ETS1 | UBR5      |
| ETS1 | UBXN1     |
| ETS1 | UCP2      |
| ETS1 | UFC1      |
| ETS1 | UFL1      |
| ETS1 | UGDH      |
| ETS1 | UHRF1BP1L |
| ETS1 | ULK4      |
| ETS1 | UNC119    |
| ETS1 | UNC13D    |
| ETS1 | UNC45A    |
| ETS1 | UPF3A     |
| ETS1 | UPRT      |
| ETS1 | UQCR10    |
| ETS1 | UQCRB     |
| ETS1 | UQCRC1    |
| ETS1 | UQCRFS1   |
| ETS1 | UQCRH     |
| ETS1 | URI1      |
| ETS1 | URM1      |
| ETS1 | UROD      |
| ETS1 | USP14     |
| ETS1 | USP24     |
| ETS1 | USP28     |
| ETS1 | USP33     |
| ETS1 | USP34     |
| ETS1 | USP48     |
| ETS1 | USP7      |
| ETS1 | USP8      |
| ETS1 | UTP3      |
| ETS1 | UXT       |
| ETS1 | VAMP2     |
| ETS1 | VAMP8     |

|      |           |
|------|-----------|
| ETS1 | VCP       |
| ETS1 | VDAC3     |
| ETS1 | VEZF1     |
| ETS1 | VNN2      |
| ETS1 | VPS13B    |
| ETS1 | VPS13C    |
| ETS1 | VPS18     |
| ETS1 | VPS25     |
| ETS1 | VPS28     |
| ETS1 | VPS33A    |
| ETS1 | VPS39     |
| ETS1 | VPS4B     |
| ETS1 | VPS51     |
| ETS1 | VRK1      |
| ETS1 | VRK3      |
| ETS1 | WAC       |
| ETS1 | WAPL      |
| ETS1 | WASF1     |
| ETS1 | WASF2     |
| ETS1 | WDR1      |
| ETS1 | WDR13     |
| ETS1 | WDR25     |
| ETS1 | WDR33     |
| ETS1 | WDR61     |
| ETS1 | WDR74     |
| ETS1 | WDR830S   |
| ETS1 | WDR92     |
| ETS1 | WDTC1     |
| ETS1 | WFS1      |
| ETS1 | WIPF1     |
| ETS1 | WNK1      |
| ETS1 | WSB1      |
| ETS1 | WTAP      |
| ETS1 | XIAP      |
| ETS1 | XKR6      |
| ETS1 | XKR8      |
| ETS1 | XPA       |
| ETS1 | XP01      |
| ETS1 | XRCC4     |
| ETS1 | YARS2     |
| ETS1 | YIPF4     |
| ETS1 | YLPM1     |
| ETS1 | YPEL5     |
| ETS1 | YTHDC1    |
| ETS1 | YTHDC2    |
| ETS1 | YWHAB     |
| ETS1 | YWHAZ     |
| ETS1 | YY1       |
| ETS1 | ZBED5-AS1 |
| ETS1 | ZBP1      |

|      |            |
|------|------------|
| ETS1 | ZBTB17     |
| ETS1 | ZBTB20     |
| ETS1 | ZBTB43     |
| ETS1 | ZBTB45     |
| ETS1 | ZBTB7A     |
| ETS1 | ZC3H18     |
| ETS1 | ZC3HAV1    |
| ETS1 | ZCCHC3     |
| ETS1 | ZCCHC7     |
| ETS1 | ZDHC12     |
| ETS1 | ZDHC20     |
| ETS1 | ZEB1       |
| ETS1 | ZEB2       |
| ETS1 | ZFAT       |
| ETS1 | ZFC3H1     |
| ETS1 | ZFP36L2    |
| ETS1 | ZFP82      |
| ETS1 | ZFR        |
| ETS1 | ZFYVE16    |
| ETS1 | ZMYM5      |
| ETS1 | ZMYND8     |
| ETS1 | ZNF101     |
| ETS1 | ZNF106     |
| ETS1 | ZNF148     |
| ETS1 | ZNF197     |
| ETS1 | ZNF227     |
| ETS1 | ZNF281     |
| ETS1 | ZNF296     |
| ETS1 | ZNF330     |
| ETS1 | ZNF382     |
| ETS1 | ZNF428     |
| ETS1 | ZNF581     |
| ETS1 | ZNF586     |
| ETS1 | ZNF608     |
| ETS1 | ZNF611     |
| ETS1 | ZNF638     |
| ETS1 | ZNF644     |
| ETS1 | ZNF655     |
| ETS1 | ZNF674-AS1 |
| ETS1 | ZNF675     |
| ETS1 | ZNF677     |
| ETS1 | ZNF687     |
| ETS1 | ZNF701     |
| ETS1 | ZNF714     |
| ETS1 | ZNF720     |
| ETS1 | ZNF764     |
| ETS1 | ZNF800     |
| ETS1 | ZNF804A    |
| ETS1 | ZNF880     |
| ETS1 | ZNF91      |

|      |             |
|------|-------------|
| ETS1 | ZNHIT1      |
| ETS1 | ZNHIT2      |
| ETS1 | ZNRD1       |
| ETS1 | ZRANB2      |
| ETS1 | ZSCAN16-AS1 |
| ETS1 | ZSCAN2      |
| ETS1 | ZSCAN21     |
| ETS2 | DUSP5       |
| ETS2 | GTSF1       |
| ETS2 | PIK3CD      |
| ETV2 | ABHD13      |
| ETV2 | AP4M1       |
| ETV2 | APOLD1      |
| ETV2 | ARHGEF3     |
| ETV2 | ASTE1       |
| ETV2 | ATAD3A      |
| ETV2 | BCOR        |
| ETV2 | BTG2        |
| ETV2 | C18orf32    |
| ETV2 | CASP3       |
| ETV2 | CCDC91      |
| ETV2 | CENPN       |
| ETV2 | CHIC2       |
| ETV2 | CHPF        |
| ETV2 | CMIP        |
| ETV2 | COPB1       |
| ETV2 | COPG1       |
| ETV2 | CR2         |
| ETV2 | CTU1        |
| ETV2 | DDX6        |
| ETV2 | DNAJC4      |
| ETV2 | DOCK9       |
| ETV2 | DOK7        |
| ETV2 | EHD3        |
| ETV2 | EIF2AK2     |
| ETV2 | ELAC1       |
| ETV2 | ETV2        |
| ETV2 | FAM174A     |
| ETV2 | FAM200A     |
| ETV2 | GIN1        |
| ETV2 | GNPAT       |
| ETV2 | GPATCH2L    |
| ETV2 | GTDC1       |
| ETV2 | HEXA        |
| ETV2 | HSD17B11    |
| ETV2 | ICAM2       |
| ETV2 | IFT81       |
| ETV2 | INTS5       |
| ETV2 | KCNMB3      |
| ETV2 | KCNN3       |



|      |          |
|------|----------|
| ETV2 | KLF10    |
| ETV2 | KLHL42   |
| ETV2 | LHFPL2   |
| ETV2 | MBOAT2   |
| ETV2 | MCU      |
| ETV2 | MFGE8    |
| ETV2 | MGST3    |
| ETV2 | MPC2     |
| ETV2 | NAXD     |
| ETV2 | NC0A6    |
| ETV2 | NDN      |
| ETV2 | NEK6     |
| ETV2 | NFYA     |
| ETV2 | NRAS     |
| ETV2 | OGFOD1   |
| ETV2 | ORMDL2   |
| ETV2 | OTULIN   |
| ETV2 | P2RX1    |
| ETV2 | P2RY10   |
| ETV2 | PARG     |
| ETV2 | PARP10   |
| ETV2 | PBK      |
| ETV2 | PHYKPL   |
| ETV2 | PISD     |
| ETV2 | PLP2     |
| ETV2 | POGZ     |
| ETV2 | POLE2    |
| ETV2 | PRKAR2A  |
| ETV2 | PRPS2    |
| ETV2 | RAB13    |
| ETV2 | RAB40B   |
| ETV2 | RAB8B    |
| ETV2 | RASGRP1  |
| ETV2 | REV1     |
| ETV2 | RFT1     |
| ETV2 | RNFT1    |
| ETV2 | RPL26L1  |
| ETV2 | RPLP1    |
| ETV2 | RSU1     |
| ETV2 | RUNX1    |
| ETV2 | RWDD2A   |
| ETV2 | SCMH1    |
| ETV2 | SERTAD2  |
| ETV2 | SHCBP1   |
| ETV2 | SIKE1    |
| ETV2 | SLC30A7  |
| ETV2 | SLC35E2B |
| ETV2 | SNAPC3   |
| ETV2 | SNX22    |
| ETV2 | SP2      |

|      |             |
|------|-------------|
| ETV2 | SPI1        |
| ETV2 | ST7         |
| ETV2 | STARD3NL    |
| ETV2 | SUPT5H      |
| ETV2 | SUV39H1     |
| ETV2 | SUZ12       |
| ETV2 | SYT17       |
| ETV2 | TAX1BP3     |
| ETV2 | TBC1D15     |
| ETV2 | TBRG1       |
| ETV2 | THUMPD3-AS1 |
| ETV2 | TIMM17B     |
| ETV2 | TMEM106C    |
| ETV2 | TMEM161B    |
| ETV2 | TMX2        |
| ETV2 | TPP2        |
| ETV2 | TRPM7       |
| ETV2 | TTC33       |
| ETV2 | TUBB2A      |
| ETV2 | TUBB2B      |
| ETV2 | UBL4A       |
| ETV2 | USB1        |
| ETV2 | YIPF3       |
| ETV2 | ZFYVE19     |
| ETV2 | ZNF26       |
| ETV2 | ZNF322      |
| ETV2 | ZNF350      |
| ETV2 | ZNF397      |
| ETV2 | ZNF652      |
| ETV2 | ZNF660      |
| ETV2 | ZSCAN16     |
| ETV3 | ADTRP       |
| ETV3 | AGK         |
| ETV3 | AMIG02      |
| ETV3 | ARHGEF7     |
| ETV3 | CAMK1D      |
| ETV3 | CBWD3       |
| ETV3 | CCDC6       |
| ETV3 | CD226       |
| ETV3 | CEP85L      |
| ETV3 | CRK         |
| ETV3 | CSPP1       |
| ETV3 | CXorf38     |
| ETV3 | DCAF16      |
| ETV3 | DDB1        |
| ETV3 | DOCK11      |
| ETV3 | ETV3        |
| ETV3 | FAM200B     |
| ETV3 | FASTKD1     |
| ETV3 | FBX03       |

|      |          |
|------|----------|
| ETV3 | FOX01    |
| ETV3 | GABPB1   |
| ETV3 | GLYCTK   |
| ETV3 | HAA0     |
| ETV3 | HELQ     |
| ETV3 | HERPUD2  |
| ETV3 | IL7      |
| ETV3 | JAGN1    |
| ETV3 | KIAA0100 |
| ETV3 | LRRC61   |
| ETV3 | METTLL2B |
| ETV3 | MTHFD1L  |
| ETV3 | NFYA     |
| ETV3 | NPTX2    |
| ETV3 | NSUN3    |
| ETV3 | P4HA2    |
| ETV3 | PEMT     |
| ETV3 | PHF8     |
| ETV3 | PHPT1    |
| ETV3 | PIK3C3   |
| ETV3 | PNPT1    |
| ETV3 | POP1     |
| ETV3 | PTK2B    |
| ETV3 | PTMS     |
| ETV3 | PYHIN1   |
| ETV3 | RFT1     |
| ETV3 | RNF111   |
| ETV3 | RNF166   |
| ETV3 | RPS6KA3  |
| ETV3 | SCRN2    |
| ETV3 | SLAMF1   |
| ETV3 | SLC29A1  |
| ETV3 | SPRY1    |
| ETV3 | STARD10  |
| ETV3 | STAT5A   |
| ETV3 | TBC1D31  |
| ETV3 | TMEM120A |
| ETV3 | TMEM234  |
| ETV3 | TOB2     |
| ETV3 | VCPIP1   |
| ETV3 | ZNF212   |
| ETV3 | ZNF544   |
| ETV5 | ABRACL   |
| ETV5 | ACSL3    |
| ETV5 | ADAM17   |
| ETV5 | ADRM1    |
| ETV5 | AKIP1    |
| ETV5 | ANAPC1   |
| ETV5 | ANAPC10  |
| ETV5 | ANGEL2   |

|      |          |
|------|----------|
| ETV5 | APPBP2   |
| ETV5 | AQR      |
| ETV5 | ARHGAP35 |
| ETV5 | ARHGEF7  |
| ETV5 | ARID4B   |
| ETV5 | ARMCX6   |
| ETV5 | ARPP19   |
| ETV5 | ARRB2    |
| ETV5 | ASCC1    |
| ETV5 | ATAD2    |
| ETV5 | ATG10    |
| ETV5 | ATXN2    |
| ETV5 | B9D2     |
| ETV5 | BAG1     |
| ETV5 | BAP1     |
| ETV5 | BBC3     |
| ETV5 | BCAR3    |
| ETV5 | BCAT1    |
| ETV5 | BCLAF1   |
| ETV5 | BDP1     |
| ETV5 | BIK      |
| ETV5 | BRAP     |
| ETV5 | C16orf91 |
| ETV5 | C19orf48 |
| ETV5 | C3orf14  |
| ETV5 | C6orf226 |
| ETV5 | CAMKK2   |
| ETV5 | CAPN10   |
| ETV5 | CCDC25   |
| ETV5 | CCDC51   |
| ETV5 | CCDC61   |
| ETV5 | CCNB1IP1 |
| ETV5 | CD53     |
| ETV5 | CD70     |
| ETV5 | CDC34    |
| ETV5 | CDC42EP3 |
| ETV5 | CEBPD    |
| ETV5 | CEP57    |
| ETV5 | CEP89    |
| ETV5 | CETN3    |
| ETV5 | COA1     |
| ETV5 | COASY    |
| ETV5 | COCH     |
| ETV5 | COMMD10  |
| ETV5 | COR01C   |
| ETV5 | COX15    |
| ETV5 | COX16    |
| ETV5 | CPM      |
| ETV5 | CTDSP1   |
| ETV5 | CTNNBIP1 |

|      |            |
|------|------------|
| ETV5 | CTPS1      |
| ETV5 | CUL4A      |
| ETV5 | CYSTM1     |
| ETV5 | CYTH2      |
| ETV5 | DDHD1      |
| ETV5 | DIAPH3     |
| ETV5 | DLGAP1-AS1 |
| ETV5 | DUS1L      |
| ETV5 | DUSP10     |
| ETV5 | DYM        |
| ETV5 | ECSIT      |
| ETV5 | EEFSEC     |
| ETV5 | EGR1       |
| ETV5 | EGR2       |
| ETV5 | EIF5A      |
| ETV5 | ETV5       |
| ETV5 | EZH2       |
| ETV5 | FAAP24     |
| ETV5 | FAM120A    |
| ETV5 | FBX025     |
| ETV5 | FGD5-AS1   |
| ETV5 | FGD6       |
| ETV5 | FHOD1      |
| ETV5 | FKBP1B     |
| ETV5 | FTSJ3      |
| ETV5 | G6PD       |
| ETV5 | GAMT       |
| ETV5 | GANAB      |
| ETV5 | GMEB1      |
| ETV5 | GMIP       |
| ETV5 | GMNN       |
| ETV5 | GNPTG      |
| ETV5 | GOLGA8A    |
| ETV5 | GPSM3      |
| ETV5 | GRIPAP1    |
| ETV5 | GRK6       |
| ETV5 | GSPT2      |
| ETV5 | GSTM4      |
| ETV5 | H2AFX      |
| ETV5 | HADHB      |
| ETV5 | HAUS8      |
| ETV5 | HDHD2      |
| ETV5 | HIBCH      |
| ETV5 | HLA-DMB    |
| ETV5 | HMGNS      |
| ETV5 | HNRNPLL    |
| ETV5 | HUWE1      |
| ETV5 | HYLS1      |
| ETV5 | IDE        |
| ETV5 | IDI1       |

|      |           |
|------|-----------|
| ETV5 | IFT122    |
| ETV5 | IFT74     |
| ETV5 | INSIG2    |
| ETV5 | INTS7     |
| ETV5 | INTS8     |
| ETV5 | IZUM04    |
| ETV5 | KAT8      |
| ETV5 | KATNAL1   |
| ETV5 | KCNAB2    |
| ETV5 | KCTD6     |
| ETV5 | KHDC1     |
| ETV5 | KIN       |
| ETV5 | KLHL20    |
| ETV5 | KLHL6     |
| ETV5 | KREMEN2   |
| ETV5 | LARP4B    |
| ETV5 | LEPROT    |
| ETV5 | LGALS8    |
| ETV5 | LIMK2     |
| ETV5 | LMNB1     |
| ETV5 | LMO2      |
| ETV5 | LPCAT3    |
| ETV5 | LPXN      |
| ETV5 | LRMP      |
| ETV5 | LSAMP     |
| ETV5 | LTA4H     |
| ETV5 | MAD2L2    |
| ETV5 | MAPKAP1   |
| ETV5 | MAPRE2    |
| ETV5 | MBD6      |
| ETV5 | MCM3      |
| ETV5 | MDM2      |
| ETV5 | MED11     |
| ETV5 | MIR3681HG |
| ETV5 | MPC2      |
| ETV5 | MPP6      |
| ETV5 | MRM2      |
| ETV5 | MROH1     |
| ETV5 | MRPL39    |
| ETV5 | MTBP      |
| ETV5 | MTR       |
| ETV5 | MTRF1     |
| ETV5 | MTX2      |
| ETV5 | MYH10     |
| ETV5 | NAA60     |
| ETV5 | NBN       |
| ETV5 | NCK1      |
| ETV5 | NC0A7     |
| ETV5 | NDFIP2    |
| ETV5 | NDUFB5    |

|      |          |
|------|----------|
| ETV5 | NEDD4L   |
| ETV5 | NFAT5    |
| ETV5 | NFATC1   |
| ETV5 | NFATC3   |
| ETV5 | NLK      |
| ETV5 | NOM03    |
| ETV5 | NOSIP    |
| ETV5 | NSL1     |
| ETV5 | NUB1     |
| ETV5 | NUP214   |
| ETV5 | NUP62    |
| ETV5 | ORC6     |
| ETV5 | OSBPL10  |
| ETV5 | PAICS    |
| ETV5 | PANK1    |
| ETV5 | PAX5     |
| ETV5 | PCGF3    |
| ETV5 | PDCD6IP  |
| ETV5 | PDGFD    |
| ETV5 | PGS1     |
| ETV5 | PHACTR2  |
| ETV5 | PIGA     |
| ETV5 | PITPNA   |
| ETV5 | PLCL2    |
| ETV5 | POC1A    |
| ETV5 | POLDIP3  |
| ETV5 | PPM1G    |
| ETV5 | PPP1R35  |
| ETV5 | PPP4R3A  |
| ETV5 | PRCP     |
| ETV5 | PRKAA1   |
| ETV5 | PRKRA    |
| ETV5 | PRPF4B   |
| ETV5 | PRPSAP2  |
| ETV5 | PRR7     |
| ETV5 | PRRC2B   |
| ETV5 | PURA     |
| ETV5 | PYM1     |
| ETV5 | RBBP6    |
| ETV5 | RBM22    |
| ETV5 | RBM23    |
| ETV5 | RGS13    |
| ETV5 | RNASEH2A |
| ETV5 | RNF20    |
| ETV5 | ROCK1    |
| ETV5 | RPA2     |
| ETV5 | RUVBL1   |
| ETV5 | S100A10  |
| ETV5 | S100A13  |
| ETV5 | SAR1A    |

|      |          |
|------|----------|
| ETV5 | SCNM1    |
| ETV5 | SEC22A   |
| ETV5 | SERP2    |
| ETV5 | SETX     |
| ETV5 | SFT2D3   |
| ETV5 | SGPP1    |
| ETV5 | SH3RF1   |
| ETV5 | SHC1     |
| ETV5 | SHOC2    |
| ETV5 | SIRT7    |
| ETV5 | SLA      |
| ETV5 | SLC16A1  |
| ETV5 | SLC25A19 |
| ETV5 | SLC35A4  |
| ETV5 | SLC4A1AP |
| ETV5 | SLF2     |
| ETV5 | SMARCA2  |
| ETV5 | SMC5     |
| ETV5 | SMS      |
| ETV5 | SMURF2   |
| ETV5 | SPSB3    |
| ETV5 | ST20     |
| ETV5 | ST3GAL5  |
| ETV5 | STAP1    |
| ETV5 | STARD3NL |
| ETV5 | STK24    |
| ETV5 | STX16    |
| ETV5 | SUCLG1   |
| ETV5 | SUPT6H   |
| ETV5 | SYNJ2    |
| ETV5 | SYTL2    |
| ETV5 | TAOK3    |
| ETV5 | TCEAL3   |
| ETV5 | TIA1     |
| ETV5 | TIMM22   |
| ETV5 | TIMMDC1  |
| ETV5 | TLR10    |
| ETV5 | TMBIM1   |
| ETV5 | TMEM11   |
| ETV5 | TMEM41B  |
| ETV5 | TMUB2    |
| ETV5 | TP53     |
| ETV5 | TP73     |
| ETV5 | TPGS1    |
| ETV5 | TPM4     |
| ETV5 | TRAF7    |
| ETV5 | TRAPPC10 |
| ETV5 | TRNT1    |
| ETV5 | TSEN34   |
| ETV5 | TSP0     |



|      |          |
|------|----------|
| ETV5 | TXLNG    |
| ETV5 | TXNRD1   |
| ETV5 | TYMS     |
| ETV5 | UBA2     |
| ETV5 | UBALD1   |
| ETV5 | UBAP1    |
| ETV5 | UBE2R2   |
| ETV5 | UCHL5    |
| ETV5 | UHRF2    |
| ETV5 | UQCRH    |
| ETV5 | USF2     |
| ETV5 | VPS35    |
| ETV5 | VPS72    |
| ETV5 | WASF2    |
| ETV5 | WBP4     |
| ETV5 | WDR26    |
| ETV5 | WDR33    |
| ETV5 | WDR55    |
| ETV5 | WDTC1    |
| ETV5 | WNK2     |
| ETV5 | WRNIP1   |
| ETV5 | WSB2     |
| ETV5 | XKR6     |
| ETV5 | XRCC4    |
| ETV5 | XRCC5    |
| ETV5 | YARS2    |
| ETV5 | YTHDF1   |
| ETV5 | YWHAG    |
| ETV5 | ZBTB2    |
| ETV5 | ZC3H14   |
| ETV5 | ZDHHC13  |
| ETV5 | ZFAND4   |
| ETV5 | ZFP36    |
| ETV5 | ZNF485   |
| ETV5 | ZNF532   |
| ETV5 | ZNF544   |
| ETV5 | ZNF608   |
| ETV5 | ZNF721   |
| ETV6 | ADAM28   |
| ETV6 | AFF1     |
| ETV6 | AGPAT5   |
| ETV6 | ANTXR2   |
| ETV6 | AP4S1    |
| ETV6 | APOBEC3C |
| ETV6 | ARHGAP24 |
| ETV6 | ARID3A   |
| ETV6 | ARID5B   |
| ETV6 | ARL6IP5  |
| ETV6 | B2M      |
| ETV6 | BMF      |

|      |           |
|------|-----------|
| ETV6 | CBX6      |
| ETV6 | CCDC50    |
| ETV6 | CCDC71L   |
| ETV6 | CCL22     |
| ETV6 | CIB2      |
| ETV6 | CNN3      |
| ETV6 | CNPY3     |
| ETV6 | COPA      |
| ETV6 | COX7C     |
| ETV6 | CRLF3     |
| ETV6 | DAPK3     |
| ETV6 | DDHD1     |
| ETV6 | DDIT4     |
| ETV6 | DOK1      |
| ETV6 | EEF1A1    |
| ETV6 | EEF1B2    |
| ETV6 | EMP3      |
| ETV6 | EPHB6     |
| ETV6 | EPSTI1    |
| ETV6 | ETV6      |
| ETV6 | FABP5     |
| ETV6 | FAM184A   |
| ETV6 | FASTKD5   |
| ETV6 | FCGR2B    |
| ETV6 | FLNA      |
| ETV6 | FUCA2     |
| ETV6 | FXVD5     |
| ETV6 | FZD6      |
| ETV6 | GANAB     |
| ETV6 | GNPTG     |
| ETV6 | GPR183    |
| ETV6 | HLA-A     |
| ETV6 | IFITM2    |
| ETV6 | IFNGR1    |
| ETV6 | IL2RG     |
| ETV6 | KLF6      |
| ETV6 | KREMEN2   |
| ETV6 | LDLRAD4   |
| ETV6 | LINC00528 |
| ETV6 | LM07      |
| ETV6 | LRRC32    |
| ETV6 | LY6E      |
| ETV6 | MSRA      |
| ETV6 | MTBP      |
| ETV6 | MX2       |
| ETV6 | NCALD     |
| ETV6 | NDUFAF1   |
| ETV6 | NF2       |
| ETV6 | NFE2L2    |
| ETV6 | NR4A2     |

|      |               |
|------|---------------|
| ETV6 | P2RX5-TAX1BP3 |
| ETV6 | P2RY10        |
| ETV6 | PAAF1         |
| ETV6 | PABPC1        |
| ETV6 | PDCD4         |
| ETV6 | PDLIM1        |
| ETV6 | PIGK          |
| ETV6 | PIP5K1B       |
| ETV6 | PLP2          |
| ETV6 | PPP1R14B      |
| ETV6 | RAB34         |
| ETV6 | RACK1         |
| ETV6 | RARA          |
| ETV6 | RASAL1        |
| ETV6 | RASSF5        |
| ETV6 | RHOC          |
| ETV6 | RNASEH2B      |
| ETV6 | RP9           |
| ETV6 | RPL10         |
| ETV6 | RPL10A        |
| ETV6 | RPL11         |
| ETV6 | RPL12         |
| ETV6 | RPL13         |
| ETV6 | RPL13A        |
| ETV6 | RPL14         |
| ETV6 | RPL15         |
| ETV6 | RPL18         |
| ETV6 | RPL18A        |
| ETV6 | RPL19         |
| ETV6 | RPL21         |
| ETV6 | RPL23A        |
| ETV6 | RPL26         |
| ETV6 | RPL27         |
| ETV6 | RPL27A        |
| ETV6 | RPL28         |
| ETV6 | RPL29         |
| ETV6 | RPL3          |
| ETV6 | RPL30         |
| ETV6 | RPL31         |
| ETV6 | RPL32         |
| ETV6 | RPL34         |
| ETV6 | RPL35         |
| ETV6 | RPL35A        |
| ETV6 | RPL36         |
| ETV6 | RPL37         |
| ETV6 | RPL37A        |
| ETV6 | RPL39         |
| ETV6 | RPL4          |
| ETV6 | RPL41         |
| ETV6 | RPL5          |

|      |           |
|------|-----------|
| ETV6 | RPL6      |
| ETV6 | RPL7      |
| ETV6 | RPLP1     |
| ETV6 | RPLP2     |
| ETV6 | RPS10     |
| ETV6 | RPS11     |
| ETV6 | RPS12     |
| ETV6 | RPS13     |
| ETV6 | RPS14     |
| ETV6 | RPS16     |
| ETV6 | RPS17     |
| ETV6 | RPS18     |
| ETV6 | RPS19     |
| ETV6 | RPS2      |
| ETV6 | RPS20     |
| ETV6 | RPS21     |
| ETV6 | RPS24     |
| ETV6 | RPS25     |
| ETV6 | RPS27     |
| ETV6 | RPS27A    |
| ETV6 | RPS29     |
| ETV6 | RPS3      |
| ETV6 | RPS3A     |
| ETV6 | RPS4Y1    |
| ETV6 | RPS5      |
| ETV6 | RPS6      |
| ETV6 | RPS7      |
| ETV6 | RPS8      |
| ETV6 | RPSA      |
| ETV6 | RTN4      |
| ETV6 | SAT1      |
| ETV6 | SERINC1   |
| ETV6 | SERINC3   |
| ETV6 | SH3BGRL3  |
| ETV6 | SIGIRR    |
| ETV6 | SLC12A6   |
| ETV6 | SNX2      |
| ETV6 | SP100     |
| ETV6 | STARD10   |
| ETV6 | STAT3     |
| ETV6 | TARS      |
| ETV6 | TCAF1     |
| ETV6 | TMSB4X    |
| ETV6 | TMTC4     |
| ETV6 | TNFRSF12A |
| ETV6 | TNFRSF13B |
| ETV6 | TNRC6B    |
| ETV6 | TPT1      |
| ETV6 | TRAF3IP3  |
| ETV6 | TSHZ2     |

|      |          |
|------|----------|
| ETV6 | TUBA1A   |
| ETV6 | U2AF1L4  |
| ETV6 | UBA52    |
| ETV6 | VIM      |
| ETV6 | VRK2     |
| ETV6 | YPEL2    |
| ETV6 | ZBTB32   |
| ETV6 | ZFP36    |
| ETV6 | ZFP36L1  |
| ETV7 | ABCB9    |
| ETV7 | ABHD2    |
| ETV7 | ADAM28   |
| ETV7 | ALKBH3   |
| ETV7 | ALOX5AP  |
| ETV7 | ANG      |
| ETV7 | ARID5B   |
| ETV7 | ARL6IP5  |
| ETV7 | ATP10D   |
| ETV7 | B3GALT4  |
| ETV7 | BAZ2A    |
| ETV7 | BLVRA    |
| ETV7 | BSDC1    |
| ETV7 | BTNL9    |
| ETV7 | C16orf58 |
| ETV7 | C16orf74 |
| ETV7 | C19orf81 |
| ETV7 | C6orf106 |
| ETV7 | CADM1    |
| ETV7 | CAPG     |
| ETV7 | CBWD1    |
| ETV7 | CBX4     |
| ETV7 | CBX7     |
| ETV7 | CCDC88B  |
| ETV7 | CCNDBP1  |
| ETV7 | CCPG1    |
| ETV7 | CD180    |
| ETV7 | CD19     |
| ETV7 | CD53     |
| ETV7 | CD63     |
| ETV7 | CD96     |
| ETV7 | CDIPT    |
| ETV7 | CEP41    |
| ETV7 | CHIC2    |
| ETV7 | CHID1    |
| ETV7 | CHPF     |
| ETV7 | CHPF2    |
| ETV7 | CHRNA1   |
| ETV7 | CHST12   |
| ETV7 | CIITA    |
| ETV7 | COG8     |

|      |            |
|------|------------|
| ETV7 | COPA       |
| ETV7 | COR01B     |
| ETV7 | CPT2       |
| ETV7 | CSGALNACT2 |
| ETV7 | CSNK1E     |
| ETV7 | CSNK1G3    |
| ETV7 | CUTA       |
| ETV7 | CYB5A      |
| ETV7 | CYTIP      |
| ETV7 | DAAM1      |
| ETV7 | DCTD       |
| ETV7 | DDOST      |
| ETV7 | DENND1C    |
| ETV7 | DENND3     |
| ETV7 | DERL3      |
| ETV7 | DHRS7      |
| ETV7 | DHRS9      |
| ETV7 | DMD        |
| ETV7 | DNAJC1     |
| ETV7 | DNAJC24    |
| ETV7 | EBAG9      |
| ETV7 | EDEM2      |
| ETV7 | EHD3       |
| ETV7 | EMC7       |
| ETV7 | ERGIC2     |
| ETV7 | ERLEC1     |
| ETV7 | ERP44      |
| ETV7 | EVI2B      |
| ETV7 | EXT1       |
| ETV7 | EXTL2      |
| ETV7 | FAM102A    |
| ETV7 | FAM135A    |
| ETV7 | FAM174A    |
| ETV7 | FAM3C      |
| ETV7 | FBXW7      |
| ETV7 | FERMT3     |
| ETV7 | FGD2       |
| ETV7 | FGFR1      |
| ETV7 | FKBP2      |
| ETV7 | FLOT1      |
| ETV7 | FNDC3A     |
| ETV7 | FNDC3B     |
| ETV7 | FOXN3      |
| ETV7 | FOXO3      |
| ETV7 | FUCA2      |
| ETV7 | FUT7       |
| ETV7 | FUT8-AS1   |
| ETV7 | GALE       |
| ETV7 | GAS6       |
| ETV7 | GLRX       |

|      |          |
|------|----------|
| ETV7 | GLS      |
| ETV7 | GOLGB1   |
| ETV7 | GOLT1B   |
| ETV7 | GORASP2  |
| ETV7 | GOSR2    |
| ETV7 | GPAA1    |
| ETV7 | GPR137B  |
| ETV7 | GPR160   |
| ETV7 | GPR34    |
| ETV7 | GPR65    |
| ETV7 | GUCD1    |
| ETV7 | GYPC     |
| ETV7 | HEXB     |
| ETV7 | HHEX     |
| ETV7 | HIST1H4H |
| ETV7 | HLA-DMA  |
| ETV7 | HLA-DPA1 |
| ETV7 | HLA-DPB1 |
| ETV7 | HM13     |
| ETV7 | HMOX2    |
| ETV7 | H00K2    |
| ETV7 | H0XB2    |
| ETV7 | HSP90B1  |
| ETV7 | ICAM1    |
| ETV7 | ICAM3    |
| ETV7 | IFI27L2  |
| ETV7 | IFNG-AS1 |
| ETV7 | IL12RB1  |
| ETV7 | IL16     |
| ETV7 | INSIG2   |
| ETV7 | IRF1     |
| ETV7 | ITFG2    |
| ETV7 | ITGB1    |
| ETV7 | ITSN2    |
| ETV7 | JMJD8    |
| ETV7 | J0SD2    |
| ETV7 | KCNK6    |
| ETV7 | KCNN4    |
| ETV7 | KCTD20   |
| ETV7 | KDEL3    |
| ETV7 | KIAA0232 |
| ETV7 | KLHDC2   |
| ETV7 | KLHL12   |
| ETV7 | KRT18    |
| ETV7 | KRTCAP2  |
| ETV7 | LAPTM5   |
| ETV7 | LM02     |
| ETV7 | LM04     |
| ETV7 | LPP      |
| ETV7 | LRP10    |

|      |            |
|------|------------|
| ETV7 | LSP1       |
| ETV7 | LUZP1      |
| ETV7 | LY96       |
| ETV7 | LYPLAL1    |
| ETV7 | MAFG       |
| ETV7 | MAGED1     |
| ETV7 | MAGEH1     |
| ETV7 | MBNL2      |
| ETV7 | METTLL15   |
| ETV7 | MFSD5      |
| ETV7 | MGAT1      |
| ETV7 | MGAT4A     |
| ETV7 | MGMT       |
| ETV7 | MGST2      |
| ETV7 | MIXL1      |
| ETV7 | MKLN1      |
| ETV7 | MKS1       |
| ETV7 | MPZL1      |
| ETV7 | MRPL48     |
| ETV7 | MTERF4     |
| ETV7 | MTMR14     |
| ETV7 | MTMR2      |
| ETV7 | MXD4       |
| ETV7 | MYO1G      |
| ETV7 | MZB1       |
| ETV7 | NAA30      |
| ETV7 | NAA60      |
| ETV7 | NCF4       |
| ETV7 | NDUFA1     |
| ETV7 | NEK6       |
| ETV7 | NINJ2      |
| ETV7 | NMRK1      |
| ETV7 | NORAD      |
| ETV7 | NUP153     |
| ETV7 | ORC2       |
| ETV7 | ORMDL3     |
| ETV7 | OST4       |
| ETV7 | P4HB       |
| ETV7 | PAG1       |
| ETV7 | PARM1      |
| ETV7 | PARVG      |
| ETV7 | PCED1B     |
| ETV7 | PCYT1A     |
| ETV7 | PDIA5      |
| ETV7 | PGM3       |
| ETV7 | PHF1       |
| ETV7 | PIGT       |
| ETV7 | PIK3CD-AS2 |
| ETV7 | PIK3CG     |
| ETV7 | PLD3       |



|      |           |
|------|-----------|
| ETV7 | PLD4      |
| ETV7 | PLEKHG2   |
| ETV7 | PMEP A1   |
| ETV7 | PNOC      |
| ETV7 | POLR2A    |
| ETV7 | POU2AF1   |
| ETV7 | PPP2R5D   |
| ETV7 | PPP2R5E   |
| ETV7 | PRKCSH    |
| ETV7 | PRKD2     |
| ETV7 | PRPSAP2   |
| ETV7 | PRR5      |
| ETV7 | PTAFR     |
| ETV7 | PTGS1     |
| ETV7 | PTP4A2    |
| ETV7 | PTPRN2    |
| ETV7 | QPCT      |
| ETV7 | RAB11B    |
| ETV7 | RAB11FIP1 |
| ETV7 | RBM18     |
| ETV7 | RBM47     |
| ETV7 | RBMX2     |
| ETV7 | REEP3     |
| ETV7 | RGS13     |
| ETV7 | RHBDF2    |
| ETV7 | RICTOR    |
| ETV7 | RNF13     |
| ETV7 | RNF4      |
| ETV7 | RNFT2     |
| ETV7 | RPL10     |
| ETV7 | RPN1      |
| ETV7 | RPS26     |
| ETV7 | RRNAD1    |
| ETV7 | S100A10   |
| ETV7 | SDC1      |
| ETV7 | SEC22B    |
| ETV7 | SEL1L3    |
| ETV7 | SEMA4D    |
| ETV7 | SENP7     |
| ETV7 | SERF2     |
| ETV7 | SERP1     |
| ETV7 | SETBP1    |
| ETV7 | SGK1      |
| ETV7 | SGMS1     |
| ETV7 | SIAE      |
| ETV7 | SIL1      |
| ETV7 | SIPA1L1   |
| ETV7 | SKAP1     |
| ETV7 | SLC39A7   |
| ETV7 | SLC44A1   |

|      |            |
|------|------------|
| ETV7 | SMAP2      |
| ETV7 | SMIM14     |
| ETV7 | SMIM20     |
| ETV7 | SNAP23     |
| ETV7 | SNX13      |
| ETV7 | SNX17      |
| ETV7 | SNX22      |
| ETV7 | SP3        |
| ETV7 | SPATA33    |
| ETV7 | SPATS2     |
| ETV7 | SPCS3      |
| ETV7 | SPIN2B     |
| ETV7 | SPINT2     |
| ETV7 | SPRED2     |
| ETV7 | SPSB3      |
| ETV7 | SSR3       |
| ETV7 | SSSCA1     |
| ETV7 | ST6GAL1    |
| ETV7 | ST6GALNAC4 |
| ETV7 | STAT1      |
| ETV7 | STAT3      |
| ETV7 | STK17B     |
| ETV7 | STK33      |
| ETV7 | STXBP6     |
| ETV7 | SYNRG      |
| ETV7 | TAF7       |
| ETV7 | TBC1D10C   |
| ETV7 | TBC1D22A   |
| ETV7 | TBC1D9B    |
| ETV7 | TCIRG1     |
| ETV7 | TERF2IP    |
| ETV7 | TEX264     |
| ETV7 | THAP2      |
| ETV7 | TIMMDC1    |
| ETV7 | TM9SF2     |
| ETV7 | TMBIM6     |
| ETV7 | TMC03      |
| ETV7 | TMED10     |
| ETV7 | TMEM156    |
| ETV7 | TMEM208    |
| ETV7 | TMEM242    |
| ETV7 | TMEM59     |
| ETV7 | TOP3B      |
| ETV7 | TOR4A      |
| ETV7 | TOX        |
| ETV7 | TP53INP1   |
| ETV7 | TPD52      |
| ETV7 | TRAPPC2    |
| ETV7 | TRAPPC2B   |
| ETV7 | TRAPPC6A   |

|      |          |
|------|----------|
| ETV7 | TRPM7    |
| ETV7 | TSC22D3  |
| ETV7 | TSPAN13  |
| ETV7 | TSPYL2   |
| ETV7 | TXNDC5   |
| ETV7 | U2AF1L4  |
| ETV7 | UAP1     |
| ETV7 | UBC      |
| ETV7 | UBE2D2   |
| ETV7 | UBE2W    |
| ETV7 | UBFD1    |
| ETV7 | UCP2     |
| ETV7 | UGGT2    |
| ETV7 | UMAD1    |
| ETV7 | UTY      |
| ETV7 | UVRAG    |
| ETV7 | VGLL4    |
| ETV7 | VPREB1   |
| ETV7 | VPS37B   |
| ETV7 | WIPF1    |
| ETV7 | XAB2     |
| ETV7 | YIPF1    |
| ETV7 | YIPF3    |
| ETV7 | YWHAB    |
| ETV7 | ZBTB20   |
| ETV7 | ZBTB38   |
| ETV7 | ZFAND4   |
| ETV7 | ZFAND6   |
| ETV7 | ZNF200   |
| ETV7 | ZNF790   |
| ETV7 | ZNF821   |
| FLI1 | ABCC4    |
| FLI1 | ABTB1    |
| FLI1 | ACAP1    |
| FLI1 | AC01     |
| FLI1 | ACTG1    |
| FLI1 | ADAM23   |
| FLI1 | AGPAT1   |
| FLI1 | AHNAK    |
| FLI1 | ANKS3    |
| FLI1 | ANXA4    |
| FLI1 | ANXA6    |
| FLI1 | AP1S3    |
| FLI1 | AP5B1    |
| FLI1 | ARHGAP30 |
| FLI1 | ARHGDIB  |
| FLI1 | ARHGEF1  |
| FLI1 | ARID4A   |
| FLI1 | ARL6IP5  |
| FLI1 | ARMCX5   |

|      |          |
|------|----------|
| FLI1 | ARPC1B   |
| FLI1 | ARPC2    |
| FLI1 | ARSA     |
| FLI1 | ASCL2    |
| FLI1 | ATE1     |
| FLI1 | ATF7IP   |
| FLI1 | ATG16L2  |
| FLI1 | ATM      |
| FLI1 | ATP6V0A1 |
| FLI1 | ATP6V0E1 |
| FLI1 | ATP6V1H  |
| FLI1 | ATXN2L   |
| FLI1 | AZI2     |
| FLI1 | B2M      |
| FLI1 | B3GNT9   |
| FLI1 | BIN1     |
| FLI1 | BLCAP    |
| FLI1 | BLK      |
| FLI1 | C16orf74 |
| FLI1 | C1orf112 |
| FLI1 | C2orf49  |
| FLI1 | C9orf72  |
| FLI1 | CALHM2   |
| FLI1 | CAMK2G   |
| FLI1 | CAP1     |
| FLI1 | CAPN1    |
| FLI1 | CAPZB    |
| FLI1 | CARS2    |
| FLI1 | CASP4    |
| FLI1 | CAT      |
| FLI1 | CBLB     |
| FLI1 | CBR3     |
| FLI1 | CCNDBP1  |
| FLI1 | CCNI     |
| FLI1 | CD180    |
| FLI1 | CD37     |
| FLI1 | CD52     |
| FLI1 | CD53     |
| FLI1 | CD69     |
| FLI1 | CD74     |
| FLI1 | CD79A    |
| FLI1 | CD79B    |
| FLI1 | CEP85L   |
| FLI1 | CHD4     |
| FLI1 | CHMP3    |
| FLI1 | CHUK     |
| FLI1 | CNN2     |
| FLI1 | CNPY3    |
| FLI1 | CNTN2    |
| FLI1 | COR01A   |

|      |           |
|------|-----------|
| FLI1 | CPT1A     |
| FLI1 | CRBN      |
| FLI1 | CREBZF    |
| FLI1 | CTPS2     |
| FLI1 | CTSH      |
| FLI1 | CTSS      |
| FLI1 | CTSZ      |
| FLI1 | CWC22     |
| FLI1 | CXXC5     |
| FLI1 | CYB561A3  |
| FLI1 | CYTH4     |
| FLI1 | CYTIP     |
| FLI1 | DALRD3    |
| FLI1 | DAPK3     |
| FLI1 | DBNL      |
| FLI1 | DCTN2     |
| FLI1 | DDAH2     |
| FLI1 | DDX39B    |
| FLI1 | DNAJC25   |
| FLI1 | DNAJC4    |
| FLI1 | DNASE1L3  |
| FLI1 | DOCK8     |
| FLI1 | DOPEY2    |
| FLI1 | DTX3      |
| FLI1 | DUSP22    |
| FLI1 | ELF2      |
| FLI1 | EPSTI1    |
| FLI1 | ERCC6L    |
| FLI1 | EVI2A     |
| FLI1 | EVI2B     |
| FLI1 | EVL       |
| FLI1 | EXT1      |
| FLI1 | FADS3     |
| FLI1 | FAM69A    |
| FLI1 | FAM72C    |
| FLI1 | FANCI     |
| FLI1 | FBX09     |
| FLI1 | FBXW4     |
| FLI1 | FCGR2B    |
| FLI1 | FDFT1     |
| FLI1 | FKBP15    |
| FLI1 | FLI1      |
| FLI1 | FLOT2     |
| FLI1 | FRY       |
| FLI1 | FYN       |
| FLI1 | GABARAPL2 |
| FLI1 | GABPA     |
| FLI1 | GANC      |
| FLI1 | GAPT      |
| FLI1 | GAPVD1    |

|      |           |
|------|-----------|
| FLI1 | GLIPR1    |
| FLI1 | GLUL      |
| FLI1 | GMPR2     |
| FLI1 | GNAI3     |
| FLI1 | GPSM3     |
| FLI1 | GRK6      |
| FLI1 | HCK       |
| FLI1 | HEBP1     |
| FLI1 | HIBCH     |
| FLI1 | HLA-DMA   |
| FLI1 | HLA-DMB   |
| FLI1 | HLA-F     |
| FLI1 | HMOX1     |
| FLI1 | HP1BP3    |
| FLI1 | HPCAL1    |
| FLI1 | HVCN1     |
| FLI1 | IGBP1     |
| FLI1 | IL10RA    |
| FLI1 | IL16      |
| FLI1 | IL27RA    |
| FLI1 | IRF2BP2   |
| FLI1 | ISCU      |
| FLI1 | ITGB7     |
| FLI1 | KIAA2013  |
| FLI1 | KLHL12    |
| FLI1 | LAPTM5    |
| FLI1 | LAT2      |
| FLI1 | LBH       |
| FLI1 | LINC00877 |
| FLI1 | LMBRD1    |
| FLI1 | LM02      |
| FLI1 | LRR1      |
| FLI1 | LRR37B    |
| FLI1 | LRRFIP1   |
| FLI1 | LSP1      |
| FLI1 | LY86      |
| FLI1 | MARCH1    |
| FLI1 | MED23     |
| FLI1 | MEF2C     |
| FLI1 | MFF       |
| FLI1 | MGAT4A    |
| FLI1 | MLKL      |
| FLI1 | MORC3     |
| FLI1 | MPG       |
| FLI1 | MS4A1     |
| FLI1 | MS4A7     |
| FLI1 | MTPN      |
| FLI1 | MVB12A    |
| FLI1 | MYL12A    |
| FLI1 | MYL5      |

|      |          |
|------|----------|
| FLI1 | MYL6     |
| FLI1 | MYO1F    |
| FLI1 | N4BP2L2  |
| FLI1 | NACC1    |
| FLI1 | NBAS     |
| FLI1 | NCOA3    |
| FLI1 | NCR3     |
| FLI1 | NDE1     |
| FLI1 | NDEL1    |
| FLI1 | NR4A2    |
| FLI1 | NUB1     |
| FLI1 | OGFR     |
| FLI1 | OTUD5    |
| FLI1 | P2RX5    |
| FLI1 | PCSK7    |
| FLI1 | PCY0X1L  |
| FLI1 | PDCD6IP  |
| FLI1 | PDE4B    |
| FLI1 | PDLIM1   |
| FLI1 | PDP1     |
| FLI1 | PEX16    |
| FLI1 | PEX2     |
| FLI1 | PIAS3    |
| FLI1 | PJA2     |
| FLI1 | PLA2G6   |
| FLI1 | PLEKHF1  |
| FLI1 | PLEKH01  |
| FLI1 | PLEKH02  |
| FLI1 | PNISR    |
| FLI1 | PNN      |
| FLI1 | POU2AF1  |
| FLI1 | PPP1R16A |
| FLI1 | PQLC2    |
| FLI1 | PREX1    |
| FLI1 | PRKCB    |
| FLI1 | PSMB9    |
| FLI1 | PTPN18   |
| FLI1 | PTPRS    |
| FLI1 | PYCARD   |
| FLI1 | RAC2     |
| FLI1 | RALB     |
| FLI1 | RASGRP2  |
| FLI1 | RASSF7   |
| FLI1 | RB1      |
| FLI1 | RCSD1    |
| FLI1 | RERE     |
| FLI1 | RGS14    |
| FLI1 | RHOH     |
| FLI1 | RICTOR   |
| FLI1 | RNASET2  |

|      |           |
|------|-----------|
| FLI1 | RNF4      |
| FLI1 | RPL13A    |
| FLI1 | RPL18     |
| FLI1 | RPL23A    |
| FLI1 | RPL28     |
| FLI1 | RPL30     |
| FLI1 | RPS15     |
| FLI1 | RPS27     |
| FLI1 | RPS4X     |
| FLI1 | RPSA      |
| FLI1 | RUSC1     |
| FLI1 | S100A4    |
| FLI1 | S1PR4     |
| FLI1 | SAPCD2    |
| FLI1 | SEC11A    |
| FLI1 | SECISBP2L |
| FLI1 | SEPT6     |
| FLI1 | SEPT9     |
| FLI1 | SGMS1     |
| FLI1 | SH3BGRL   |
| FLI1 | SH3BGRL3  |
| FLI1 | SHKBP1    |
| FLI1 | SLC4A2    |
| FLI1 | SLC4A7    |
| FLI1 | SMIM14    |
| FLI1 | SNX2      |
| FLI1 | SNX3      |
| FLI1 | SP100     |
| FLI1 | SPI1      |
| FLI1 | SPN       |
| FLI1 | SSPN      |
| FLI1 | STX12     |
| FLI1 | SUSD6     |
| FLI1 | SYF2      |
| FLI1 | SYMPK     |
| FLI1 | TANG02    |
| FLI1 | TATDN1    |
| FLI1 | TBC1D10C  |
| FLI1 | TBC1D9    |
| FLI1 | TBRG1     |
| FLI1 | TCEAL1    |
| FLI1 | TCF4      |
| FLI1 | TM2D1     |
| FLI1 | TMEM129   |
| FLI1 | TMEM154   |
| FLI1 | TMEM156   |
| FLI1 | TMSB10    |
| FLI1 | TMSB4X    |
| FLI1 | TNFRSF13C |
| FLI1 | TPM4      |



|      |          |
|------|----------|
| FLI1 | TRAF3IP3 |
| FLI1 | TRAF4    |
| FLI1 | TROAP    |
| FLI1 | TSC22D3  |
| FLI1 | TSP0     |
| FLI1 | TTC13    |
| FLI1 | TTC39C   |
| FLI1 | TTL      |
| FLI1 | TWF2     |
| FLI1 | UACA     |
| FLI1 | UCP2     |
| FLI1 | UNC93B1  |
| FLI1 | VAMP2    |
| FLI1 | VPS4B    |
| FLI1 | WARS2    |
| FLI1 | WDR34    |
| FLI1 | YPEL3    |
| FLI1 | ZAP70    |
| FLI1 | ZBTB25   |
| FLI1 | ZBTB7A   |
| FLI1 | ZCWPW1   |
| FLI1 | ZDHHC21  |
| FLI1 | ZNF524   |
| FLI1 | ZNF596   |
| FLI1 | ZNF720   |
| FLI1 | ZNF814   |
| FLI1 | ZSWIM8   |
| FOS  | AASDHPPT |
| FOS  | ABCB8    |
| FOS  | ABHD14A  |
| FOS  | ACADVL   |
| FOS  | ACAP1    |
| FOS  | ACAP3    |
| FOS  | AC02     |
| FOS  | AC0XL    |
| FOS  | ACSS1    |
| FOS  | ADAR     |
| FOS  | ADGRE5   |
| FOS  | ADM      |
| FOS  | ADNP-AS1 |
| FOS  | AEBP1    |
| FOS  | AGFG1    |
| FOS  | AIFM2    |
| FOS  | AKR1A1   |
| FOS  | ALDH6A1  |
| FOS  | ALG14    |
| FOS  | ALG2     |
| FOS  | ALG3     |
| FOS  | ALG9     |
| FOS  | ALKBH6   |

|     |          |
|-----|----------|
| F0S | AMOTL1   |
| F0S | ANG      |
| F0S | ANKH     |
| F0S | ANKRD12  |
| F0S | ANKRD28  |
| F0S | ANKRD37  |
| F0S | ANKRD54  |
| F0S | AP3D1    |
| F0S | APH1B    |
| F0S | AP0L3    |
| F0S | AP0LD1   |
| F0S | APTR     |
| F0S | AREG     |
| F0S | ARFGAP3  |
| F0S | ARHGAP17 |
| F0S | ARHGEF12 |
| F0S | ARID3A   |
| F0S | ARID4B   |
| F0S | ARL1     |
| F0S | ARL6IP1  |
| F0S | ARMC5    |
| F0S | ARMCX3   |
| F0S | ARMCX5   |
| F0S | ARSA     |
| F0S | ARSG     |
| F0S | ASAP1    |
| F0S | ATE1     |
| F0S | ATF6     |
| F0S | ATF6B    |
| F0S | ATL3     |
| F0S | ATP13A1  |
| F0S | ATP6AP1  |
| F0S | ATP6AP2  |
| F0S | ATP6V0A1 |
| F0S | ATP6V1G1 |
| F0S | ATXN2    |
| F0S | AURKB    |
| F0S | B2M      |
| F0S | B3GAT3   |
| F0S | BCKDK    |
| F0S | BCL11A   |
| F0S | BEND5    |
| F0S | BET1     |
| F0S | BEX4     |
| F0S | BICD2    |
| F0S | BLVRA    |
| F0S | BLZF1    |
| F0S | BNIP3L   |
| F0S | BOLA2B   |
| F0S | BORCS6   |

|     |           |
|-----|-----------|
| F0S | BTG2      |
| F0S | BUB3      |
| F0S | C14orf28  |
| F0S | C15orf53  |
| F0S | C17orf107 |
| F0S | C18orf32  |
| F0S | C19orf38  |
| F0S | C1GALT1C1 |
| F0S | C2orf69   |
| F0S | C4orf33   |
| F0S | CADM1     |
| F0S | CALCOC01  |
| F0S | CALU      |
| F0S | CBX4      |
| F0S | CCDC14    |
| F0S | CCDC144A  |
| F0S | CCDC77    |
| F0S | CCDC88A   |
| F0S | CCDC9     |
| F0S | CCNDBP1   |
| F0S | CCNF      |
| F0S | CCNL1     |
| F0S | CCNYL1    |
| F0S | CCR10     |
| F0S | CD180     |
| F0S | CD22      |
| F0S | CD37      |
| F0S | CD38      |
| F0S | CD46      |
| F0S | CD63      |
| F0S | CD74      |
| F0S | CDADC1    |
| F0S | CDCA3     |
| F0S | CDCA8     |
| F0S | CDK1      |
| F0S | CDK14     |
| F0S | CDKN1B    |
| F0S | CENPA     |
| F0S | CENPL     |
| F0S | CENPT     |
| F0S | CEP89     |
| F0S | CERCAM    |
| F0S | CERS2     |
| F0S | CERS5     |
| F0S | CHAC1     |
| F0S | CHERP     |
| F0S | CHFR      |
| F0S | CHL1      |
| F0S | CHPF      |
| F0S | CHRN1     |

|     |         |
|-----|---------|
| F0S | CHST12  |
| F0S | CHST2   |
| F0S | CISD2   |
| F0S | CITED2  |
| F0S | CKAP2   |
| F0S | CKS2    |
| F0S | CLCN3   |
| F0S | CLIP1   |
| F0S | CLK1    |
| F0S | CLK3    |
| F0S | CLK4    |
| F0S | CLNK    |
| F0S | CLOCK   |
| F0S | CNEP1R1 |
| F0S | CNOT6L  |
| F0S | CNPY3   |
| F0S | CNR1    |
| F0S | COR01C  |
| F0S | CPEB4   |
| F0S | CPM     |
| F0S | CPNE3   |
| F0S | CPNE5   |
| F0S | CREB3L2 |
| F0S | CREBRF  |
| F0S | CSRNP1  |
| F0S | CTHRC1  |
| F0S | CTSB    |
| F0S | CTSZ    |
| F0S | CUL1    |
| F0S | CXCR4   |
| F0S | CXorf56 |
| F0S | CYB561  |
| F0S | CYB5R1  |
| F0S | CYTH2   |
| F0S | CYTH4   |
| F0S | CYTIP   |
| F0S | DCAF11  |
| F0S | DCAF5   |
| F0S | DCP2    |
| F0S | DCXR    |
| F0S | DDAH2   |
| F0S | DDHD1   |
| F0S | DDI2    |
| F0S | DDIT4   |
| F0S | DDOST   |
| F0S | DDX3X   |
| F0S | DDX3Y   |
| F0S | DDX49   |
| F0S | DDX5    |
| F0S | DECR2   |

|     |          |
|-----|----------|
| F0S | DEDD2    |
| F0S | DERA     |
| F0S | DERL1    |
| F0S | DERL2    |
| F0S | DERL3    |
| F0S | DGKD     |
| F0S | DHCR7    |
| F0S | DHTKD1   |
| F0S | DMXL1    |
| F0S | DNAJB9   |
| F0S | DNAJC1   |
| F0S | DNAJC25  |
| F0S | DNAJC3   |
| F0S | DNAJC4   |
| F0S | DOLK     |
| F0S | DPYD     |
| F0S | DUSP1    |
| F0S | DUSP10   |
| F0S | DUSP6    |
| F0S | DYRK4    |
| F0S | E2F2     |
| F0S | E2F5     |
| F0S | EAF2     |
| F0S | EAPP     |
| F0S | EDEM1    |
| F0S | EDEM3    |
| F0S | EGR1     |
| F0S | EHD4     |
| F0S | EIF1     |
| F0S | EIF2AK4  |
| F0S | ELM01    |
| F0S | EMC3     |
| F0S | ENTPD1   |
| F0S | EPC1     |
| F0S | EPN2     |
| F0S | ERGIC2   |
| F0S | ERGIC3   |
| F0S | ER01B    |
| F0S | ERP44    |
| F0S | FADS2    |
| F0S | FAM177A1 |
| F0S | FAM214A  |
| F0S | FAM3C    |
| F0S | FAM50A   |
| F0S | FAM69A   |
| F0S | FAM72D   |
| F0S | FAM89B   |
| F0S | FBX025   |
| F0S | FBX033   |
| F0S | FCH01    |

|     |          |
|-----|----------|
| F0S | FDFT1    |
| F0S | FGFR10P2 |
| F0S | FICD     |
| F0S | FKBP11   |
| F0S | FKBP2    |
| F0S | FKBPL    |
| F0S | FNBP4    |
| F0S | FNDC3A   |
| F0S | F0S      |
| F0S | F0SB     |
| F0S | FOX03    |
| F0S | FTH1     |
| F0S | FUCA2    |
| F0S | FXD7     |
| F0S | FZD3     |
| F0S | GADD45B  |
| F0S | GANAB    |
| F0S | GCC1     |
| F0S | GCSH     |
| F0S | GDI1     |
| F0S | GFER     |
| F0S | GGA2     |
| F0S | GIGYF2   |
| F0S | GLA      |
| F0S | GLCCI1   |
| F0S | GLIPR1   |
| F0S | GLS      |
| F0S | GLT8D1   |
| F0S | GM2A     |
| F0S | GMPPB    |
| F0S | GMPR     |
| F0S | GNG7     |
| F0S | GOLGA3   |
| F0S | GOLPH3   |
| F0S | GOLT1B   |
| F0S | GON4L    |
| F0S | GPR108   |
| F0S | GPR146   |
| F0S | GPR183   |
| F0S | GPR34    |
| F0S | GPRC5C   |
| F0S | GPSM2    |
| F0S | GRN      |
| F0S | GSS      |
| F0S | GTF2A1   |
| F0S | GYS1     |
| F0S | H1FX     |
| F0S | H3F3A    |
| F0S | H3F3B    |
| F0S | HACL1    |

|     |           |
|-----|-----------|
| F0S | HAGH      |
| F0S | HBP1      |
| F0S | HDAC10    |
| F0S | HERPUD1   |
| F0S | HEXA      |
| F0S | HEXB      |
| F0S | HIST1H1C  |
| F0S | HIST1H2AC |
| F0S | HIST1H2BG |
| F0S | HIST1H2BN |
| F0S | HLA-B     |
| F0S | HLA-DMA   |
| F0S | HLA-DOB   |
| F0S | HLA-DPA1  |
| F0S | HLA-DPB1  |
| F0S | HLA-DQB1  |
| F0S | HLA-DRA   |
| F0S | HLA-DRB1  |
| F0S | HLA-DRB5  |
| F0S | HMCE5     |
| F0S | HMGCR     |
| F0S | HMGN4     |
| F0S | HMOX2     |
| F0S | H00K1     |
| F0S | HPCAL1    |
| F0S | HSD17B7   |
| F0S | HSP90B1   |
| F0S | HSPA13    |
| F0S | HSPA4     |
| F0S | HSPA5     |
| F0S | HTR3A     |
| F0S | HY0U1     |
| F0S | IC0SLG    |
| F0S | ID2       |
| F0S | IDS       |
| F0S | IER2      |
| F0S | IER5      |
| F0S | IFI6      |
| F0S | IFNAR2    |
| F0S | IFT22     |
| F0S | IKBIP     |
| F0S | IKZF1     |
| F0S | IL2RG     |
| F0S | ILVBL     |
| F0S | ING2      |
| F0S | INSIG2    |
| F0S | IQCG      |
| F0S | IQGAP1    |
| F0S | IRF1      |
| F0S | IRS2      |

|     |           |
|-----|-----------|
| F0S | ITFG2     |
| F0S | ITGB2     |
| F0S | ITM2B     |
| F0S | ITM2C     |
| F0S | IVNS1ABP  |
| F0S | JKAMP     |
| F0S | JUN       |
| F0S | JUNB      |
| F0S | JUND      |
| F0S | KANK1     |
| F0S | KAT6A     |
| F0S | KAT6B     |
| F0S | KCNN3     |
| F0S | KDM8      |
| F0S | KIF20A    |
| F0S | KIF3B     |
| F0S | KIF5C     |
| F0S | KLF2      |
| F0S | KLF3      |
| F0S | KLF6      |
| F0S | KLHL24    |
| F0S | KPNA2     |
| F0S | LACC1     |
| F0S | LAIR1     |
| F0S | LAMP2     |
| F0S | LAPTM4A   |
| F0S | LAPTM5    |
| F0S | LARP1B    |
| F0S | LDB1      |
| F0S | LDLRAP1   |
| F0S | LEMD3     |
| F0S | LINC00926 |
| F0S | LINC01485 |
| F0S | LMAN2     |
| F0S | LOXL2     |
| F0S | LPP       |
| F0S | LRMP      |
| F0S | LRP10     |
| F0S | LTBP4     |
| F0S | LTN1      |
| F0S | LY9       |
| F0S | LYSMD3    |
| F0S | M6PR      |
| F0S | MAGED2    |
| F0S | MAGT1     |
| F0S | MAN1A1    |
| F0S | MANF      |
| F0S | MAP2K2    |
| F0S | MAP2K7    |
| F0S | MAP3K11   |



|     |             |
|-----|-------------|
| F0S | MAP3K13     |
| F0S | MAP9        |
| F0S | MAPRE1      |
| F0S | MARCH1      |
| F0S | MARCH8      |
| F0S | MARK2       |
| F0S | MAST3       |
| F0S | MBD1        |
| F0S | MBTD1       |
| F0S | MBTPS1      |
| F0S | MCL1        |
| F0S | MCM8        |
| F0S | MEF2C       |
| F0S | MEPCE       |
| F0S | METRNL      |
| F0S | MGAT1       |
| F0S | MIATNB      |
| F0S | MIR22HG     |
| F0S | MIR4435-2HG |
| F0S | MMGT1       |
| F0S | MMP23B      |
| F0S | MOB4        |
| F0S | MON2        |
| F0S | MPV17L2     |
| F0S | MRM3        |
| F0S | MRPL40      |
| F0S | MS4A1       |
| F0S | MSANTD2     |
| F0S | MSRA        |
| F0S | MTF1        |
| F0S | MT01        |
| F0S | MTSS1       |
| F0S | MUM1        |
| F0S | MVD         |
| F0S | MXD3        |
| F0S | MYADM       |
| F0S | MY018A      |
| F0S | MZB1        |
| F0S | NCAPH       |
| F0S | NCKIPSD     |
| F0S | NCR3        |
| F0S | NEAT1       |
| F0S | NET1        |
| F0S | NEU1        |
| F0S | NKX6-3      |
| F0S | NMNAT1      |
| F0S | NMRK1       |
| F0S | NPC2        |
| F0S | NRGN        |
| F0S | NSMCE3      |

|     |            |
|-----|------------|
| F0S | NT5C3A     |
| F0S | NTHL1      |
| F0S | NUCB2      |
| F0S | NUDCD2     |
| F0S | NUP153     |
| F0S | NUP54      |
| F0S | NUP98      |
| F0S | NUS1       |
| F0S | OAT        |
| F0S | OCEL1      |
| F0S | OCIAD1     |
| F0S | OIP5       |
| F0S | OS9        |
| F0S | OSTF1      |
| F0S | OTUD1      |
| F0S | OTUD5      |
| F0S | OTUD6B-AS1 |
| F0S | OXR1       |
| F0S | P2RX1      |
| F0S | P4HA1      |
| F0S | PACSIN1    |
| F0S | PAF1       |
| F0S | PAK4       |
| F0S | PARD6A     |
| F0S | PBRM1      |
| F0S | PBXIP1     |
| F0S | PDE4B      |
| F0S | PDE7A      |
| F0S | PDIA4      |
| F0S | PDK1       |
| F0S | PDSS2      |
| F0S | PDXDC1     |
| F0S | PEX2       |
| F0S | PGM3       |
| F0S | PGRMC2     |
| F0S | PHACTR1    |
| F0S | PHF1       |
| F0S | PHGDH      |
| F0S | PHLDB3     |
| F0S | PHYKPL     |
| F0S | PIF1       |
| F0S | PIGN       |
| F0S | PIK3CG     |
| F0S | PIM2       |
| F0S | PINK1      |
| F0S | PIP5K1B    |
| F0S | PJA2       |
| F0S | PKHD1L1    |
| F0S | PLCL2      |
| F0S | PLD3       |

|     |           |
|-----|-----------|
| F0S | PLEKHH3   |
| F0S | PL0D1     |
| F0S | PLPP5     |
| F0S | PLTP      |
| F0S | PMEPA1    |
| F0S | PN0C      |
| F0S | PNRC1     |
| F0S | POLD4     |
| F0S | POP1      |
| F0S | PPAT      |
| F0S | PPP1R10   |
| F0S | PPP1R15A  |
| F0S | PQBP1     |
| F0S | PRCC      |
| F0S | PRDX4     |
| F0S | PRKAR1A   |
| F0S | PRKCB     |
| F0S | PRKCSH    |
| F0S | PRKD3     |
| F0S | PRMT7     |
| F0S | PSAP      |
| F0S | PSAT1     |
| F0S | PTPN18    |
| F0S | PTPRS     |
| F0S | PTTG1IP   |
| F0S | QPCT      |
| F0S | RAB11B    |
| F0S | RAB11FIP1 |
| F0S | RAB1A     |
| F0S | RAB30     |
| F0S | RAB35     |
| F0S | RAB5B     |
| F0S | RAB5C     |
| F0S | RAB6A     |
| F0S | RABAC1    |
| F0S | RAD54L    |
| F0S | RAD9A     |
| F0S | RALGPS2   |
| F0S | RANBP6    |
| F0S | RANGRF    |
| F0S | RDH11     |
| F0S | REC8      |
| F0S | RECK      |
| F0S | REEP3     |
| F0S | RGS1      |
| F0S | RGS14     |
| F0S | RGS16     |
| F0S | RGS2      |
| F0S | RHBDD1    |
| F0S | RHEB      |

|     |             |
|-----|-------------|
| F0S | RILP        |
| F0S | RMDN3       |
| F0S | RNASEH1-AS1 |
| F0S | RNF103      |
| F0S | RNF126      |
| F0S | RNF13       |
| F0S | RNF149      |
| F0S | RNF168      |
| F0S | RNF185      |
| F0S | RNF219      |
| F0S | RNF24       |
| F0S | RPAIN       |
| F0S | RPAP2       |
| F0S | RPN1        |
| F0S | RPN2        |
| F0S | RRBP1       |
| F0S | RRN3        |
| F0S | RSRP1       |
| F0S | RWDD2A      |
| F0S | RYBP        |
| F0S | S100A10     |
| F0S | SAR1A       |
| F0S | SAR1B       |
| F0S | SARAF       |
| F0S | SAT2        |
| F0S | SC5D        |
| F0S | SCAMP4      |
| F0S | SCFD1       |
| F0S | SCPEP1      |
| F0S | SDCBP2      |
| F0S | SDCBP2-AS1  |
| F0S | SDF2L1      |
| F0S | SDF4        |
| F0S | SEC11C      |
| F0S | SEC23B      |
| F0S | SEC62       |
| F0S | SEL1L       |
| F0S | SELPLG      |
| F0S | SEMA4D      |
| F0S | SENP2       |
| F0S | SERPINI1    |
| F0S | SETDB2      |
| F0S | SF3A1       |
| F0S | SGK1        |
| F0S | SGK3        |
| F0S | SGSM3       |
| F0S | SIL1        |
| F0S | SIRT2       |
| F0S | SLC16A3     |
| F0S | SLC17A9     |

|     |            |
|-----|------------|
| F0S | SLC20A2    |
| F0S | SLC25A42   |
| F0S | SLC26A6    |
| F0S | SLC27A4    |
| F0S | SLC2A6     |
| F0S | SLC30A5    |
| F0S | SLC30A6    |
| F0S | SLC31A2    |
| F0S | SLC33A1    |
| F0S | SLC35B1    |
| F0S | SLC35C1    |
| F0S | SLC37A4    |
| F0S | SLC38A10   |
| F0S | SLC39A11   |
| F0S | SLC39A8    |
| F0S | SLC3A2     |
| F0S | SLC44A1    |
| F0S | SLC4A2     |
| F0S | SLC7A7     |
| F0S | SLC9A3     |
| F0S | SMIM14     |
| F0S | SMYD4      |
| F0S | SNIP1      |
| F0S | SNTB1      |
| F0S | SNX2       |
| F0S | SNX29      |
| F0S | S0CS3      |
| F0S | S0CS5      |
| F0S | S0N        |
| F0S | SPAG4      |
| F0S | SPCS2      |
| F0S | SPCS3      |
| F0S | SPDL1      |
| F0S | SPINT2     |
| F0S | SPOCK2     |
| F0S | SPTBN1     |
| F0S | SPTLC2     |
| F0S | SQSTM1     |
| F0S | SRPK2      |
| F0S | SRSF5      |
| F0S | SSH2       |
| F0S | SSR4       |
| F0S | ST3GAL2    |
| F0S | ST6GALNAC4 |
| F0S | STARD5     |
| F0S | STK17B     |
| F0S | STOM       |
| F0S | STRBP      |
| F0S | STT3A      |
| F0S | STT3B      |

|     |          |
|-----|----------|
| F0S | STX5     |
| F0S | SUDS3    |
| F0S | SUN1     |
| F0S | SUN2     |
| F0S | SWSAP1   |
| F0S | SYNGR1   |
| F0S | SYPL1    |
| F0S | SYVN1    |
| F0S | TAF4B    |
| F0S | TAGAP    |
| F0S | TBC1D10C |
| F0S | TBC1D15  |
| F0S | TBC1D17  |
| F0S | TBCC     |
| F0S | TECR     |
| F0S | TES      |
| F0S | TEX264   |
| F0S | TFG      |
| F0S | TFRC     |
| F0S | THOP1    |
| F0S | TIMM17B  |
| F0S | TM9SF2   |
| F0S | TMBIM6   |
| F0S | TMED10   |
| F0S | TMED9    |
| F0S | TMEM123  |
| F0S | TMEM129  |
| F0S | TMEM167A |
| F0S | TMEM167B |
| F0S | TMEM170A |
| F0S | TMEM184B |
| F0S | TMEM184C |
| F0S | TMEM19   |
| F0S | TMEM205  |
| F0S | TMEM218  |
| F0S | TMEM263  |
| F0S | TMEM39A  |
| F0S | TMEM59   |
| F0S | TMF1     |
| F0S | TNFAIP3  |
| F0S | TOR3A    |
| F0S | TP53BP2  |
| F0S | TP53INP1 |
| F0S | TPD52L2  |
| F0S | TPRA1    |
| F0S | TPST2    |
| F0S | TRABD    |
| F0S | TRAIP    |
| F0S | TRAM1    |
| F0S | TRAM2    |

|     |          |
|-----|----------|
| F0S | TRAPPC2B |
| F0S | TRDMT1   |
| F0S | TRIB1    |
| F0S | TRIM39   |
| F0S | TSC22D3  |
| F0S | TSC22D4  |
| F0S | TSPAN13  |
| F0S | TSPAN17  |
| F0S | TTC9C    |
| F0S | TTK      |
| F0S | TUT1     |
| F0S | UAP1     |
| F0S | UBC      |
| F0S | UBE2C    |
| F0S | UBE2F    |
| F0S | UBE2H    |
| F0S | UBE2L6   |
| F0S | UBXN2B   |
| F0S | UMAD1    |
| F0S | UNC93B1  |
| F0S | UNK      |
| F0S | USF3     |
| F0S | US01     |
| F0S | USPL1    |
| F0S | VEGFB    |
| F0S | VPS35    |
| F0S | VPS4A    |
| F0S | VRK2     |
| F0S | VRK3     |
| F0S | WASL     |
| F0S | WDPCP    |
| F0S | WDR45    |
| F0S | WDR82    |
| F0S | WFS1     |
| F0S | WHAMM    |
| F0S | WIPF1    |
| F0S | XBP1     |
| F0S | XRCC3    |
| F0S | XRN1     |
| F0S | YIF1A    |
| F0S | YIF1B    |
| F0S | YKT6     |
| F0S | YPEL3    |
| F0S | YPEL5    |
| F0S | YTHDF1   |
| F0S | ZAP70    |
| F0S | ZCCHC4   |
| F0S | ZDHHC16  |
| F0S | ZFAND2B  |
| F0S | ZFP36    |

|      |         |
|------|---------|
| FOS  | ZFP36L2 |
| FOS  | ZHX2    |
| FOS  | ZMYND11 |
| FOS  | ZNF101  |
| FOS  | ZNF217  |
| FOS  | ZNF24   |
| FOS  | ZNF287  |
| FOS  | ZNF318  |
| FOS  | ZNF44   |
| FOS  | ZNF583  |
| FOS  | ZNF597  |
| FOS  | ZNF622  |
| FOS  | ZNF689  |
| FOS  | ZNF770  |
| FOS  | ZNF791  |
| FOS  | ZNF821  |
| FOS  | ZNF836  |
| FOSB | ACAP3   |
| FOSB | ACBD5   |
| FOSB | ADAT1   |
| FOSB | ARFGEF2 |
| FOSB | ARMCX3  |
| FOSB | BSDC1   |
| FOSB | C1GALT1 |
| FOSB | CBFA2T2 |
| FOSB | CD63    |
| FOSB | CDK11B  |
| FOSB | CHD2    |
| FOSB | COL19A1 |
| FOSB | CSE1L   |
| FOSB | CYB5D2  |
| FOSB | DHRS7B  |
| FOSB | DUSP1   |
| FOSB | EGR1    |
| FOSB | ELL2    |
| FOSB | FKBPL   |
| FOSB | FOS     |
| FOSB | FOSB    |
| FOSB | FUCA2   |
| FOSB | HAUS5   |
| FOSB | IER2    |
| FOSB | JUN     |
| FOSB | JUNB    |
| FOSB | JUND    |
| FOSB | KANSL1  |
| FOSB | KDELRL1 |
| FOSB | KLF6    |
| FOSB | KLF9    |
| FOSB | LMBRD1  |
| FOSB | LMF1    |



|       |          |
|-------|----------|
| FOSB  | MBIP     |
| FOSB  | MDN1     |
| FOSB  | MED15    |
| FOSB  | MIA3     |
| FOSB  | MIR22HG  |
| FOSB  | NEAT1    |
| FOSB  | NFATC2   |
| FOSB  | NR4A2    |
| FOSB  | P2RX1    |
| FOSB  | P2RY10   |
| FOSB  | PJA1     |
| FOSB  | PKN1     |
| FOSB  | PLTP     |
| FOSB  | PNRC1    |
| FOSB  | PPP1R15A |
| FOSB  | PRR3     |
| FOSB  | RRBP1    |
| FOSB  | RRNAD1   |
| FOSB  | SETD1B   |
| FOSB  | SGK1     |
| FOSB  | SH3GL1   |
| FOSB  | SLC39A13 |
| FOSB  | SMARCAD1 |
| FOSB  | SPDL1    |
| FOSB  | SSR4     |
| FOSB  | STAT3    |
| FOSB  | TBC1D23  |
| FOSB  | TLE3     |
| FOSB  | TMUB2    |
| FOSB  | TPM4     |
| FOSB  | TRIB1    |
| FOSB  | TSPAN31  |
| FOSB  | UBQLN1   |
| FOSB  | YTHDF1   |
| FOSB  | ZFP36    |
| FOSB  | ZNF335   |
| FOSL1 | ADRM1    |
| FOSL1 | ANKRD37  |
| FOSL1 | ANKRD46  |
| FOSL1 | ANXA5    |
| FOSL1 | AP1G1    |
| FOSL1 | APTX     |
| FOSL1 | ARL8B    |
| FOSL1 | ARPP19   |
| FOSL1 | ATAD3A   |
| FOSL1 | ATF1     |
| FOSL1 | ATG16L1  |
| FOSL1 | ATL3     |
| FOSL1 | ATP1A1   |
| FOSL1 | ATP1B3   |

|       |          |
|-------|----------|
| F0SL1 | BACH1    |
| F0SL1 | BRIX1    |
| F0SL1 | BZW2     |
| F0SL1 | C20orf27 |
| F0SL1 | CACUL1   |
| F0SL1 | CCDC130  |
| F0SL1 | CCDC59   |
| F0SL1 | CCL3     |
| F0SL1 | CCL3L1   |
| F0SL1 | CCL4     |
| F0SL1 | CCL4L2   |
| F0SL1 | CCND2    |
| F0SL1 | CCSER2   |
| F0SL1 | CCT4     |
| F0SL1 | CCT6A    |
| F0SL1 | CD44     |
| F0SL1 | CD55     |
| F0SL1 | CD86     |
| F0SL1 | CDC23    |
| F0SL1 | CDK4     |
| F0SL1 | CEBPZ    |
| F0SL1 | CHD1     |
| F0SL1 | CHST15   |
| F0SL1 | CSRNP1   |
| F0SL1 | CYCS     |
| F0SL1 | DCTD     |
| F0SL1 | DCUN1D5  |
| F0SL1 | DDX10    |
| F0SL1 | DDX21    |
| F0SL1 | DDX27    |
| F0SL1 | DDX49    |
| F0SL1 | DESI1    |
| F0SL1 | DNPEP    |
| F0SL1 | DNTTIP2  |
| F0SL1 | DUSP10   |
| F0SL1 | DUSP5    |
| F0SL1 | E4F1     |
| F0SL1 | EEF1E1   |
| F0SL1 | EIF3J    |
| F0SL1 | EIF4A1   |
| F0SL1 | ERCC2    |
| F0SL1 | ESF1     |
| F0SL1 | EVI2A    |
| F0SL1 | FAM131A  |
| F0SL1 | FAM162A  |
| F0SL1 | FAM213A  |
| F0SL1 | FAM50A   |
| F0SL1 | FBL      |
| F0SL1 | F0SL1    |
| F0SL1 | GFOD1    |

|       |          |
|-------|----------|
| FOSL1 | GNL2     |
| FOSL1 | GNL3     |
| FOSL1 | GRPEL1   |
| FOSL1 | GTDC1    |
| FOSL1 | GTPBP4   |
| FOSL1 | H3F3B    |
| FOSL1 | HDHD2    |
| FOSL1 | HGS      |
| FOSL1 | HIVEP3   |
| FOSL1 | HLA-E    |
| FOSL1 | HSP90AB1 |
| FOSL1 | HSPD1    |
| FOSL1 | IFIH1    |
| FOSL1 | IFRD1    |
| FOSL1 | IL6      |
| FOSL1 | IN080    |
| FOSL1 | ISCA1    |
| FOSL1 | ITGB2    |
| FOSL1 | JUND     |
| FOSL1 | KDM5B    |
| FOSL1 | KLF6     |
| FOSL1 | LDHA     |
| FOSL1 | LENG8    |
| FOSL1 | LRPPRC   |
| FOSL1 | LRRFIP1  |
| FOSL1 | LYAR     |
| FOSL1 | M6PR     |
| FOSL1 | MAG0H    |
| FOSL1 | MAG0HB   |
| FOSL1 | MAP2K3   |
| FOSL1 | MAP4K5   |
| FOSL1 | MAPK13   |
| FOSL1 | MAT2A    |
| FOSL1 | MATK     |
| FOSL1 | MED15    |
| FOSL1 | METTTL1  |
| FOSL1 | METTTL13 |
| FOSL1 | MIDN     |
| FOSL1 | MIR155HG |
| FOSL1 | MSANTD2  |
| FOSL1 | MTHFD1L  |
| FOSL1 | NABP1    |
| FOSL1 | NDUFAF4  |
| FOSL1 | NEDD4L   |
| FOSL1 | NFE2L1   |
| FOSL1 | NFKBID   |
| FOSL1 | NIFK     |
| FOSL1 | NIP7     |
| FOSL1 | NOB1     |
| FOSL1 | NOC4L    |

|       |          |
|-------|----------|
| F0SL1 | N0LC1    |
| F0SL1 | N0P58    |
| F0SL1 | NPW      |
| F0SL1 | NUP98    |
| F0SL1 | ODC1     |
| F0SL1 | OSBP     |
| F0SL1 | PCGF5    |
| F0SL1 | PIGS     |
| F0SL1 | PIM3     |
| F0SL1 | PITPNB   |
| F0SL1 | PLK2     |
| F0SL1 | PLRG1    |
| F0SL1 | PMAIP1   |
| F0SL1 | PNPLA4   |
| F0SL1 | P0LR3C   |
| F0SL1 | PPA2     |
| F0SL1 | PPCDC    |
| F0SL1 | PPFIA1   |
| F0SL1 | PPP1R10  |
| F0SL1 | PRKCSH   |
| F0SL1 | PRMT5    |
| F0SL1 | PRNP     |
| F0SL1 | PRR14    |
| F0SL1 | PRRG4    |
| F0SL1 | PSME3    |
| F0SL1 | PTP4A1   |
| F0SL1 | PYCR1    |
| F0SL1 | RAB27A   |
| F0SL1 | RAB7A    |
| F0SL1 | RAN      |
| F0SL1 | RANBP1   |
| F0SL1 | RBM15B   |
| F0SL1 | REEP3    |
| F0SL1 | RMDN3    |
| F0SL1 | RNASEH2B |
| F0SL1 | RNF145   |
| F0SL1 | RNF220   |
| F0SL1 | RPF2     |
| F0SL1 | RSL1D1   |
| F0SL1 | RSL24D1  |
| F0SL1 | RUNX3    |
| F0SL1 | SACS     |
| F0SL1 | SBDS     |
| F0SL1 | SCAMP3   |
| F0SL1 | SERPINE2 |
| F0SL1 | SF1      |
| F0SL1 | SGK1     |
| F0SL1 | SGTA     |
| F0SL1 | SLAMF1   |
| F0SL1 | SLC1A5   |

|       |            |
|-------|------------|
| F0SL1 | SLC25A39   |
| F0SL1 | SLC35A4    |
| F0SL1 | SLC3A2     |
| F0SL1 | SLC43A1    |
| F0SL1 | SMARCA1    |
| F0SL1 | SMG7       |
| F0SL1 | SNHG15     |
| F0SL1 | SNX8       |
| F0SL1 | SNX9       |
| F0SL1 | SOD2       |
| F0SL1 | SOS1       |
| F0SL1 | SPRY1      |
| F0SL1 | SPRYD4     |
| F0SL1 | SRGN       |
| F0SL1 | SRM        |
| F0SL1 | SRSF7      |
| F0SL1 | ST6GALNAC3 |
| F0SL1 | STAT5A     |
| F0SL1 | STX4       |
| F0SL1 | SUPV3L1    |
| F0SL1 | TBRG4      |
| F0SL1 | TGIF1      |
| F0SL1 | TINF2      |
| F0SL1 | TM2D2      |
| F0SL1 | TMEM126A   |
| F0SL1 | TMEM147    |
| F0SL1 | TNFAIP8    |
| F0SL1 | TNFSF14    |
| F0SL1 | TOMM40     |
| F0SL1 | TRAF1      |
| F0SL1 | TRAP1      |
| F0SL1 | TRAPPC8    |
| F0SL1 | TRDMT1     |
| F0SL1 | TRIB3      |
| F0SL1 | TSPYL2     |
| F0SL1 | TUFM       |
| F0SL1 | TVP23C     |
| F0SL1 | U2SURP     |
| F0SL1 | UBA6       |
| F0SL1 | UBE2B      |
| F0SL1 | USP14      |
| F0SL1 | UTP14A     |
| F0SL1 | UTP6       |
| F0SL1 | VPS33A     |
| F0SL1 | VPS37B     |
| F0SL1 | WDR12      |
| F0SL1 | WDR74      |
| F0SL1 | WDR75      |
| F0SL1 | WIPI1      |
| F0SL1 | XRRA1      |

|       |          |
|-------|----------|
| F0SL1 | ZNF121   |
| F0SL1 | ZNF330   |
| F0SL1 | ZNF511   |
| F0SL1 | ZNF593   |
| FOXJ2 | ABTB1    |
| FOXJ2 | FAM49B   |
| FOXJ2 | FOXJ2    |
| FOXJ2 | IFT20    |
| FOXJ2 | POU2AF1  |
| FOXJ2 | SLC2A1   |
| FOX01 | BCL11A   |
| FOX01 | CDK17    |
| FOX01 | FAM20B   |
| FOX01 | FBXL17   |
| FOX01 | FOX01    |
| FOX01 | GCNT1    |
| FOX01 | GNB4     |
| FOX01 | HIP1R    |
| FOX01 | ITPKB    |
| FOX01 | KLC1     |
| FOX01 | LIMS1    |
| FOX01 | NFATC2   |
| FOX01 | RCAN3    |
| FOX01 | SDCCAG8  |
| FOX01 | SERPINB8 |
| FOX01 | SLC25A20 |
| FOX01 | STX6     |
| FOX03 | ABR      |
| FOX03 | ACSS1    |
| FOX03 | AEN      |
| FOX03 | CRNDE    |
| FOX03 | FOS      |
| FOX03 | FOX03    |
| FOX03 | GAS6     |
| FOX03 | LM04     |
| FOX03 | MBNL2    |
| FOX03 | NEDD9    |
| FOX03 | NUCB2    |
| FOX03 | OTUD1    |
| FOX03 | PLPP5    |
| FOX03 | SGK3     |
| FOXP1 | BTG1     |
| FOXP1 | FOXP1    |
| FOXP1 | PDCD4    |
| FOXP1 | PPP3CA   |
| FOXP1 | TGIF1    |
| FOXP1 | ZEB2     |
| FOXP4 | BRD3     |
| FOXP4 | CUL4B    |
| FOXP4 | FOXP4    |

|       |          |
|-------|----------|
| FOXP4 | MACROD1  |
| FOXP4 | SLC7A7   |
| FOXP4 | TSHZ1    |
| GABPA | ACER3    |
| GABPA | ADSL     |
| GABPA | AFF2     |
| GABPA | ALAS1    |
| GABPA | ANAPC15  |
| GABPA | ANK1     |
| GABPA | APBB1IP  |
| GABPA | ARL14EP  |
| GABPA | ASNSD1   |
| GABPA | ATF3     |
| GABPA | ATG4D    |
| GABPA | ATP6V1B2 |
| GABPA | ATXN3    |
| GABPA | B4GALT5  |
| GABPA | BBIP1    |
| GABPA | BCKDHB   |
| GABPA | BMP7     |
| GABPA | BNIP2    |
| GABPA | C14orf93 |
| GABPA | C19orf38 |
| GABPA | C2CD2L   |
| GABPA | CAD      |
| GABPA | CALCOC01 |
| GABPA | CCAR2    |
| GABPA | CCDC122  |
| GABPA | CCDC6    |
| GABPA | CCDC86   |
| GABPA | CCNB1    |
| GABPA | CCNB2    |
| GABPA | CCNJ     |
| GABPA | CD37     |
| GABPA | CDADC1   |
| GABPA | CDC20    |
| GABPA | CDC34    |
| GABPA | CDCA7L   |
| GABPA | CDK9     |
| GABPA | CHEK1    |
| GABPA | COPS2    |
| GABPA | CPSF2    |
| GABPA | CPSF4    |
| GABPA | CRTC2    |
| GABPA | CSNK1A1  |
| GABPA | CTPS2    |
| GABPA | CUL3     |
| GABPA | CUTC     |
| GABPA | CXorf21  |
| GABPA | DCP1B    |

|       |            |
|-------|------------|
| GABPA | DDX20      |
| GABPA | DDX42      |
| GABPA | DLEU2      |
| GABPA | DNAJB1     |
| GABPA | DOCK8      |
| GABPA | DSCC1      |
| GABPA | DTNBP1     |
| GABPA | DYNC1LI1   |
| GABPA | EEPDI      |
| GABPA | EVI5       |
| GABPA | FAF2       |
| GABPA | FAM217B    |
| GABPA | FBXL17     |
| GABPA | FBX028     |
| GABPA | FLII       |
| GABPA | FUT11      |
| GABPA | GABPA      |
| GABPA | GABPB1-AS1 |
| GABPA | GBE1       |
| GABPA | GEMIN8     |
| GABPA | GRWD1      |
| GABPA | GSPT2      |
| GABPA | GTDC1      |
| GABPA | GTF2H2     |
| GABPA | GTF3C1     |
| GABPA | HERC4      |
| GABPA | HGH1       |
| GABPA | HIBADH     |
| GABPA | HS2ST1     |
| GABPA | HSDL2      |
| GABPA | HSPA1B     |
| GABPA | IER5       |
| GABPA | IL13RA1    |
| GABPA | IRF5       |
| GABPA | IZUM04     |
| GABPA | KDM3B      |
| GABPA | KLHL24     |
| GABPA | KYAT3      |
| GABPA | LAMTOR3    |
| GABPA | LRRC28     |
| GABPA | LSM8       |
| GABPA | LSS        |
| GABPA | MCAT       |
| GABPA | MDM1       |
| GABPA | METTL16    |
| GABPA | METTL3     |
| GABPA | METTL4     |
| GABPA | MIEF1      |
| GABPA | MKLN1      |
| GABPA | MKNK2      |



|       |          |
|-------|----------|
| GABPA | MRPS31   |
| GABPA | MRPS9    |
| GABPA | MSL3     |
| GABPA | MTMR9    |
| GABPA | MYO1F    |
| GABPA | NAA30    |
| GABPA | NAP1L5   |
| GABPA | NARS2    |
| GABPA | NEDD8    |
| GABPA | NUP37    |
| GABPA | NVL      |
| GABPA | NXPH4    |
| GABPA | NXT2     |
| GABPA | OSBPL10  |
| GABPA | OSER1    |
| GABPA | OTUD6B   |
| GABPA | PCGF5    |
| GABPA | PEX14    |
| GABPA | PHF13    |
| GABPA | PLCG2    |
| GABPA | PLEKHG1  |
| GABPA | POLD3    |
| GABPA | PPP1R10  |
| GABPA | PPP5C    |
| GABPA | PRKAG1   |
| GABPA | PRKRA    |
| GABPA | PSMA8    |
| GABPA | PSRC1    |
| GABPA | PWP1     |
| GABPA | RBCK1    |
| GABPA | RBF0X2   |
| GABPA | RC3H1    |
| GABPA | REV1     |
| GABPA | RFC1     |
| GABPA | RH0BTB3  |
| GABPA | RLF      |
| GABPA | RPP21    |
| GABPA | RRN3     |
| GABPA | RRP1     |
| GABPA | SAMD15   |
| GABPA | SEC14L1  |
| GABPA | SESN3    |
| GABPA | SH3TC1   |
| GABPA | SIGLEC10 |
| GABPA | SLC15A4  |
| GABPA | SLC25A26 |
| GABPA | SLC25A36 |
| GABPA | SLC35A5  |
| GABPA | SLC4A1AP |
| GABPA | SMTN     |

|       |            |
|-------|------------|
| GABPA | SP2        |
| GABPA | SPI1       |
| GABPA | SPINT1     |
| GABPA | SPN        |
| GABPA | SPON1      |
| GABPA | SPSB3      |
| GABPA | SRP72      |
| GABPA | STARD3NL   |
| GABPA | STAT2      |
| GABPA | STK40      |
| GABPA | TAF2       |
| GABPA | TATDN3     |
| GABPA | TBC1D1     |
| GABPA | TBC1D4     |
| GABPA | TFB2M      |
| GABPA | TFPI2      |
| GABPA | TIMM23B    |
| GABPA | TMED8      |
| GABPA | TMEM120B   |
| GABPA | TMEM170A   |
| GABPA | TOMM70     |
| GABPA | TRAF5      |
| GABPA | TSSC4      |
| GABPA | TUBA4A     |
| GABPA | U2AF2      |
| GABPA | UBE2Q1     |
| GABPA | UEVLD      |
| GABPA | UIMC1      |
| GABPA | USP33      |
| GABPA | UTP4       |
| GABPA | UTP6       |
| GABPA | VMAC       |
| GABPA | VRK3       |
| GABPA | WARS2      |
| GABPA | WDR70      |
| GABPA | WDR74      |
| GABPA | WEE1       |
| GABPA | WSB1       |
| GABPA | XXYLT1-AS2 |
| GABPA | YTHDF1     |
| GABPA | YTHDF3     |
| GABPA | ZBTB7A     |
| GABPA | ZC3H12A    |
| GABPA | ZC3H13     |
| GABPA | ZCCHC3     |
| GABPA | ZNF106     |
| GABPA | ZNF146     |
| GABPA | ZNF331     |
| GABPA | ZNF451     |
| GABPA | ZNF480     |

|       |          |
|-------|----------|
| GABPA | ZNF567   |
| GABPA | ZNF592   |
| GABPA | ZNF600   |
| GABPA | ZNF714   |
| GABPA | ZNF721   |
| GABPA | ZNF800   |
| GTF2B | ABCA7    |
| GTF2B | ACTL6A   |
| GTF2B | ACTR1A   |
| GTF2B | AGPAT1   |
| GTF2B | ANKRD54  |
| GTF2B | ARL6IP1  |
| GTF2B | BCL2L1   |
| GTF2B | BTBD1    |
| GTF2B | C12orf57 |
| GTF2B | CAMTA1   |
| GTF2B | CATSPER2 |
| GTF2B | CCDC130  |
| GTF2B | CCDC186  |
| GTF2B | CCT7     |
| GTF2B | CDC25A   |
| GTF2B | CDC25C   |
| GTF2B | CDK5RAP3 |
| GTF2B | CDS2     |
| GTF2B | CIRBP    |
| GTF2B | CLINT1   |
| GTF2B | COX7B    |
| GTF2B | CYTH2    |
| GTF2B | DCAF11   |
| GTF2B | DDX5     |
| GTF2B | DNAJC30  |
| GTF2B | DNAJC4   |
| GTF2B | DNAJC7   |
| GTF2B | DPP3     |
| GTF2B | EIF2B2   |
| GTF2B | EMC2     |
| GTF2B | FAM110A  |
| GTF2B | FAM72B   |
| GTF2B | FKBP14   |
| GTF2B | FNIP1    |
| GTF2B | GLS      |
| GTF2B | GMPPB    |
| GTF2B | GOLPH3L  |
| GTF2B | GOLT1B   |
| GTF2B | GORAB    |
| GTF2B | GOT1     |
| GTF2B | H3F3B    |
| GTF2B | HIST1H1A |
| GTF2B | HSCB     |
| GTF2B | HSPA8    |

|       |         |
|-------|---------|
| GTF2B | IGF2BP3 |
| GTF2B | ILF2    |
| GTF2B | IMMT    |
| GTF2B | KCNMB3  |
| GTF2B | LANCL1  |
| GTF2B | LAPTM4A |
| GTF2B | MAGT1   |
| GTF2B | MAP3K13 |
| GTF2B | MORF4L2 |
| GTF2B | MRPS12  |
| GTF2B | MSL3    |
| GTF2B | NARF    |
| GTF2B | NDUFA5  |
| GTF2B | NDUFS8  |
| GTF2B | NFYC    |
| GTF2B | NMT1    |
| GTF2B | NUDCD2  |
| GTF2B | OS9     |
| GTF2B | OSTF1   |
| GTF2B | P4HB    |
| GTF2B | PCF11   |
| GTF2B | PPM1A   |
| GTF2B | PPP2R1A |
| GTF2B | PRKCZ   |
| GTF2B | PSMA5   |
| GTF2B | RAB6A   |
| GTF2B | RBM14   |
| GTF2B | RBM48   |
| GTF2B | RCCD1   |
| GTF2B | RECQL   |
| GTF2B | RNF181  |
| GTF2B | SBDS    |
| GTF2B | SEC31A  |
| GTF2B | SPAG7   |
| GTF2B | SPCS2   |
| GTF2B | STARD4  |
| GTF2B | STAT6   |
| GTF2B | STX5    |
| GTF2B | TIMM17A |
| GTF2B | TMEM19  |
| GTF2B | TUBB4B  |
| GTF2B | TUSC2   |
| GTF2B | UBB     |
| GTF2B | UBTD2   |
| GTF2B | UMAD1   |
| GTF2B | VCP     |
| GTF2B | WFS1    |
| GTF2B | YIF1A   |
| HINFP | AKAP8L  |
| HINFP | ANAPC15 |

|        |           |
|--------|-----------|
| HINFP  | ASPH      |
| HINFP  | BANP      |
| HINFP  | BCCIP     |
| HINFP  | CD1C      |
| HINFP  | CHD8      |
| HINFP  | EBPL      |
| HINFP  | FAM3B     |
| HINFP  | FCGRT     |
| HINFP  | GOLT1B    |
| HINFP  | HINFP     |
| HINFP  | ICAM1     |
| HINFP  | LINC00324 |
| HINFP  | MTR       |
| HINFP  | NPTX2     |
| HINFP  | RAMP1     |
| HINFP  | SBN02     |
| HINFP  | SCAND1    |
| HINFP  | SEMA4B    |
| HINFP  | TMEM205   |
| HINFP  | TMSB15A   |
| HIVEP1 | HIVEP1    |
| HIVEP1 | MAP3K11   |
| HIVEP1 | PRDM2     |
| HIVEP1 | TNFRSF9   |
| HIVEP1 | WNT10A    |
| HIVEP3 | ABRACL    |
| HIVEP3 | ANKHD1    |
| HIVEP3 | ANXA6     |
| HIVEP3 | ATXN1L    |
| HIVEP3 | BEX4      |
| HIVEP3 | CAMKK2    |
| HIVEP3 | CD274     |
| HIVEP3 | CD83      |
| HIVEP3 | D2HGDH    |
| HIVEP3 | DHRS4L2   |
| HIVEP3 | FCRL5     |
| HIVEP3 | GATAD1    |
| HIVEP3 | HIVEP3    |
| HIVEP3 | HLA-DQA1  |
| HIVEP3 | HLA-DQB1  |
| HIVEP3 | HLA-DRA   |
| HIVEP3 | LCK       |
| HIVEP3 | MAP2K3    |
| HIVEP3 | MELTF     |
| HIVEP3 | MIOS      |
| HIVEP3 | MYB       |
| HIVEP3 | NFATC1    |
| HIVEP3 | NFKBIA    |
| HIVEP3 | NR4A1     |
| HIVEP3 | NR4A2     |

|        |          |
|--------|----------|
| HIVEP3 | OPTN     |
| HIVEP3 | PDCD1    |
| HIVEP3 | PLEKHG2  |
| HIVEP3 | PTPRE    |
| HIVEP3 | RELB     |
| HIVEP3 | RILPL2   |
| HIVEP3 | SIN3A    |
| HIVEP3 | SLC17A9  |
| HIVEP3 | STAT6    |
| HIVEP3 | TANK     |
| HIVEP3 | TRPV3    |
| H0XB2  | ADAM28   |
| H0XB2  | ADAR     |
| H0XB2  | AGPAT1   |
| H0XB2  | APBA3    |
| H0XB2  | C6orf89  |
| H0XB2  | CD63     |
| H0XB2  | CHPF     |
| H0XB2  | CMC1     |
| H0XB2  | DPM3     |
| H0XB2  | FAM174A  |
| H0XB2  | FKBP2    |
| H0XB2  | LY9      |
| H0XB2  | LY96     |
| H0XB2  | PAAF1    |
| H0XB2  | PAC SIN2 |
| H0XB2  | RAB13    |
| H0XB2  | RNASE6   |
| H0XB2  | SEC24A   |
| H0XB2  | TIMM10B  |
| H0XB2  | TM9SF3   |
| H0XB2  | TMEM208  |
| H0XB2  | YIPF5    |
| H0XB7  | GRK6     |
| H0XB7  | PHF19    |
| IKZF1  | AAAS     |
| IKZF1  | AAGAB    |
| IKZF1  | ABI1     |
| IKZF1  | ACBD3    |
| IKZF1  | ACSF3    |
| IKZF1  | ADA      |
| IKZF1  | ADPGK    |
| IKZF1  | AFF3     |
| IKZF1  | AFTPH    |
| IKZF1  | AGGF1    |
| IKZF1  | AHDC1    |
| IKZF1  | AIP      |
| IKZF1  | AK3      |
| IKZF1  | AKT2     |
| IKZF1  | ALOX5AP  |

|       |           |
|-------|-----------|
| IKZF1 | ALPK1     |
| IKZF1 | ALYREF    |
| IKZF1 | ANAPC11   |
| IKZF1 | ANKRD49   |
| IKZF1 | AP1B1     |
| IKZF1 | AP1G2     |
| IKZF1 | AP1M1     |
| IKZF1 | AP3B1     |
| IKZF1 | AP5M1     |
| IKZF1 | APBB1IP   |
| IKZF1 | APH1A     |
| IKZF1 | APOBEC3C  |
| IKZF1 | ARHGAP11B |
| IKZF1 | ARHGAP24  |
| IKZF1 | ARHGAP25  |
| IKZF1 | ARHGAP30  |
| IKZF1 | ARHGEF39  |
| IKZF1 | ARHGEF6   |
| IKZF1 | ARHGEF7   |
| IKZF1 | ARID4A    |
| IKZF1 | ARMCX6    |
| IKZF1 | ARPC1B    |
| IKZF1 | ARPC2     |
| IKZF1 | ATF6B     |
| IKZF1 | ATF7IP    |
| IKZF1 | ATG12     |
| IKZF1 | ATG2B     |
| IKZF1 | ATG7      |
| IKZF1 | ATP6V1D   |
| IKZF1 | ATP6V1E1  |
| IKZF1 | ATXN2L    |
| IKZF1 | AURKAIP1  |
| IKZF1 | BAG6      |
| IKZF1 | BAZ2A     |
| IKZF1 | BBIP1     |
| IKZF1 | BCL2A1    |
| IKZF1 | BCL2L1    |
| IKZF1 | BCLAF1    |
| IKZF1 | BDH1      |
| IKZF1 | BID       |
| IKZF1 | BLNK      |
| IKZF1 | BORCS6    |
| IKZF1 | BPGM      |
| IKZF1 | BRF2      |
| IKZF1 | C12orf75  |
| IKZF1 | C14orf119 |
| IKZF1 | C16orf91  |
| IKZF1 | C18orf21  |
| IKZF1 | C19orf25  |
| IKZF1 | C6orf52   |

|       |         |
|-------|---------|
| IKZF1 | C9orf40 |
| IKZF1 | CAAP1   |
| IKZF1 | CAB39   |
| IKZF1 | CAPNS1  |
| IKZF1 | CASP4   |
| IKZF1 | CBFA2T3 |
| IKZF1 | CCDC91  |
| IKZF1 | CCZ1    |
| IKZF1 | CD37    |
| IKZF1 | CD40    |
| IKZF1 | CD72    |
| IKZF1 | CD84    |
| IKZF1 | CDC123  |
| IKZF1 | CDC27   |
| IKZF1 | CDC40   |
| IKZF1 | CDK6    |
| IKZF1 | CDK9    |
| IKZF1 | CENPO   |
| IKZF1 | CENPQ   |
| IKZF1 | CEP135  |
| IKZF1 | CEP55   |
| IKZF1 | CFDP1   |
| IKZF1 | CGGBP1  |
| IKZF1 | CHCHD5  |
| IKZF1 | CHD2    |
| IKZF1 | CHD7    |
| IKZF1 | CHMP4B  |
| IKZF1 | CHTF8   |
| IKZF1 | CLECL1  |
| IKZF1 | CLNS1A  |
| IKZF1 | CNPPD1  |
| IKZF1 | COA6    |
| IKZF1 | COG4    |
| IKZF1 | COG8    |
| IKZF1 | COMMD5  |
| IKZF1 | COMMD6  |
| IKZF1 | COPS7A  |
| IKZF1 | COQ6    |
| IKZF1 | COX4I1  |
| IKZF1 | COX5B   |
| IKZF1 | CPSF7   |
| IKZF1 | CRIPT   |
| IKZF1 | CSK     |
| IKZF1 | CSNK1A1 |
| IKZF1 | CSNK1G3 |
| IKZF1 | CTDSP1  |
| IKZF1 | CTNNA1  |
| IKZF1 | CUL4A   |
| IKZF1 | CUTC    |
| IKZF1 | CWC15   |



|       |            |
|-------|------------|
| IKZF1 | CWC22      |
| IKZF1 | CWF19L2    |
| IKZF1 | CXXC5      |
| IKZF1 | CYB561A3   |
| IKZF1 | CYBB       |
| IKZF1 | CYFIP2     |
| IKZF1 | DALRD3     |
| IKZF1 | DAPP1      |
| IKZF1 | DBNL       |
| IKZF1 | DCAF10     |
| IKZF1 | DCAF12     |
| IKZF1 | DCAF15     |
| IKZF1 | DCLRE1C    |
| IKZF1 | DDX19B     |
| IKZF1 | DDX27      |
| IKZF1 | DDX50      |
| IKZF1 | DEF6       |
| IKZF1 | DFFA       |
| IKZF1 | DGKZ       |
| IKZF1 | DHX36      |
| IKZF1 | DLG1       |
| IKZF1 | DLGAP1-AS1 |
| IKZF1 | DLST       |
| IKZF1 | DMAP1      |
| IKZF1 | DNAJA1     |
| IKZF1 | DNAJB14    |
| IKZF1 | DNAJC10    |
| IKZF1 | DNAJC14    |
| IKZF1 | DNAL4      |
| IKZF1 | DOCK10     |
| IKZF1 | DOCK8      |
| IKZF1 | DOK3       |
| IKZF1 | DR1        |
| IKZF1 | DUSP2      |
| IKZF1 | DYNC1I2    |
| IKZF1 | E2F4       |
| IKZF1 | EAF1       |
| IKZF1 | EAPP       |
| IKZF1 | EBF1       |
| IKZF1 | EFHD2      |
| IKZF1 | EGR1       |
| IKZF1 | EIF2A      |
| IKZF1 | EIF3D      |
| IKZF1 | EIF3L      |
| IKZF1 | EIF4E2     |
| IKZF1 | EIF4EBP2   |
| IKZF1 | EIF5A      |
| IKZF1 | ELAC1      |
| IKZF1 | ELAC2      |
| IKZF1 | ELAVL1     |

|       |            |
|-------|------------|
| IKZF1 | ELK4       |
| IKZF1 | EML6       |
| IKZF1 | ENTPD1-AS1 |
| IKZF1 | EP300      |
| IKZF1 | ERBIN      |
| IKZF1 | EVI2B      |
| IKZF1 | EXOC3      |
| IKZF1 | EXOC7      |
| IKZF1 | FAAP24     |
| IKZF1 | FABP5      |
| IKZF1 | FAM32A     |
| IKZF1 | FAM49B     |
| IKZF1 | FAM50B     |
| IKZF1 | FAM96A     |
| IKZF1 | FBX011     |
| IKZF1 | FBX022     |
| IKZF1 | FBX034     |
| IKZF1 | FBXW11     |
| IKZF1 | FBXW9      |
| IKZF1 | FCGR2B     |
| IKZF1 | FCRL5      |
| IKZF1 | FDFT1      |
| IKZF1 | FGD2       |
| IKZF1 | FIBP       |
| IKZF1 | FIG4       |
| IKZF1 | FKBP1A     |
| IKZF1 | FLII       |
| IKZF1 | FMNL1      |
| IKZF1 | FRA10AC1   |
| IKZF1 | FRMD8      |
| IKZF1 | FUT7       |
| IKZF1 | G2E3       |
| IKZF1 | GABPA      |
| IKZF1 | GAK        |
| IKZF1 | GAPT       |
| IKZF1 | GATB       |
| IKZF1 | GCN1       |
| IKZF1 | GFI1       |
| IKZF1 | GGA1       |
| IKZF1 | GIT2       |
| IKZF1 | GMFG       |
| IKZF1 | GMPR2      |
| IKZF1 | GNPAT      |
| IKZF1 | GPSM3      |
| IKZF1 | GRAPL      |
| IKZF1 | GRIPAP1    |
| IKZF1 | GTF2E2     |
| IKZF1 | GTF2F1     |
| IKZF1 | GTF3A      |
| IKZF1 | HAT1       |

|       |          |
|-------|----------|
| IKZF1 | HCCS     |
| IKZF1 | HECTD1   |
| IKZF1 | HERC4    |
| IKZF1 | HMB0X1   |
| IKZF1 | H0XB4    |
| IKZF1 | HPS1     |
| IKZF1 | HPS4     |
| IKZF1 | HSPA8    |
| IKZF1 | ICAM3    |
| IKZF1 | ID2      |
| IKZF1 | IDH3B    |
| IKZF1 | IFT80    |
| IKZF1 | IKBKG    |
| IKZF1 | IKZF1    |
| IKZF1 | IKZF2    |
| IKZF1 | IL16     |
| IKZF1 | IL17RA   |
| IKZF1 | IL2RB    |
| IKZF1 | IL4I1    |
| IKZF1 | IMP3     |
| IKZF1 | IN080C   |
| IKZF1 | IN080E   |
| IKZF1 | INPP1    |
| IKZF1 | IQGAP2   |
| IKZF1 | IRF5     |
| IKZF1 | ITFG1    |
| IKZF1 | ITFG2    |
| IKZF1 | ITGAL    |
| IKZF1 | ITGB1BP1 |
| IKZF1 | ITPA     |
| IKZF1 | ITPRIPL1 |
| IKZF1 | JAK1     |
| IKZF1 | JKAMP    |
| IKZF1 | KANK2    |
| IKZF1 | KAT7     |
| IKZF1 | KBTBD4   |
| IKZF1 | KBTBD8   |
| IKZF1 | KCMF1    |
| IKZF1 | KDM2A    |
| IKZF1 | KDM5C    |
| IKZF1 | KIAA0040 |
| IKZF1 | KIF9     |
| IKZF1 | KLF10    |
| IKZF1 | KLHDC4   |
| IKZF1 | KLHL6    |
| IKZF1 | KNOP1    |
| IKZF1 | KRR1     |
| IKZF1 | LAMTOR4  |
| IKZF1 | LAS1L    |
| IKZF1 | LCMT1    |

|       |           |
|-------|-----------|
| IKZF1 | LCMT2     |
| IKZF1 | LEF1      |
| IKZF1 | LEPROTL1  |
| IKZF1 | LGALS9    |
| IKZF1 | LIMK1     |
| IKZF1 | LINC00667 |
| IKZF1 | LINC01013 |
| IKZF1 | LIPT1     |
| IKZF1 | LPGAT1    |
| IKZF1 | LRP10     |
| IKZF1 | LSM2      |
| IKZF1 | LSM8      |
| IKZF1 | LXN       |
| IKZF1 | LYN       |
| IKZF1 | LYPLA2    |
| IKZF1 | MADD      |
| IKZF1 | MAGEF1    |
| IKZF1 | MALT1     |
| IKZF1 | MANBAL    |
| IKZF1 | MAPKAP1   |
| IKZF1 | MARCH1    |
| IKZF1 | MARK3     |
| IKZF1 | MAT2B     |
| IKZF1 | MBTPS2    |
| IKZF1 | MCRS1     |
| IKZF1 | MED11     |
| IKZF1 | MED7      |
| IKZF1 | MEF2D     |
| IKZF1 | METTL17   |
| IKZF1 | METTL6    |
| IKZF1 | MFAP1     |
| IKZF1 | MFN1      |
| IKZF1 | MIATNB    |
| IKZF1 | MIR3142HG |
| IKZF1 | MKLN1     |
| IKZF1 | MKNK1     |
| IKZF1 | MLLT10    |
| IKZF1 | MPEG1     |
| IKZF1 | MPG       |
| IKZF1 | MRPL14    |
| IKZF1 | MRPL20    |
| IKZF1 | MRPL27    |
| IKZF1 | MRPL47    |
| IKZF1 | MRPL49    |
| IKZF1 | MRPL51    |
| IKZF1 | MRPL52    |
| IKZF1 | MRPS16    |
| IKZF1 | MRPS21    |
| IKZF1 | MRPS31    |
| IKZF1 | MS4A1     |

|       |         |
|-------|---------|
| IKZF1 | MSL3    |
| IKZF1 | MSN     |
| IKZF1 | MTERF4  |
| IKZF1 | MTIF3   |
| IKZF1 | MTMR2   |
| IKZF1 | MTR     |
| IKZF1 | MTRF1L  |
| IKZF1 | MUT     |
| IKZF1 | MYL12B  |
| IKZF1 | MYO1C   |
| IKZF1 | N4BP1   |
| IKZF1 | NAA35   |
| IKZF1 | NAA60   |
| IKZF1 | NABP2   |
| IKZF1 | NCKAP1L |
| IKZF1 | NDUFA13 |
| IKZF1 | NDUFB4  |
| IKZF1 | NDUFB7  |
| IKZF1 | NDUFS2  |
| IKZF1 | NDUFS3  |
| IKZF1 | NDUFS4  |
| IKZF1 | NDUFV1  |
| IKZF1 | NECAP1  |
| IKZF1 | NECAP2  |
| IKZF1 | NEDD8   |
| IKZF1 | NEK6    |
| IKZF1 | NFAT5   |
| IKZF1 | NFATC1  |
| IKZF1 | NFATC3  |
| IKZF1 | NFYC    |
| IKZF1 | NIF3L1  |
| IKZF1 | NIPBL   |
| IKZF1 | NME2    |
| IKZF1 | NNT     |
| IKZF1 | NOL8    |
| IKZF1 | NOSIP   |
| IKZF1 | NR2C2   |
| IKZF1 | NSMCE1  |
| IKZF1 | NUDC    |
| IKZF1 | NUDT21  |
| IKZF1 | NUDT5   |
| IKZF1 | NUP107  |
| IKZF1 | NUP210  |
| IKZF1 | NUP37   |
| IKZF1 | NUP93   |
| IKZF1 | OCIAD1  |
| IKZF1 | ORAI1   |
| IKZF1 | ORAI3   |
| IKZF1 | ORC2    |
| IKZF1 | OST4    |

|       |           |
|-------|-----------|
| IKZF1 | OSTF1     |
| IKZF1 | OXR1      |
| IKZF1 | PAAF1     |
| IKZF1 | PABPC1    |
| IKZF1 | PARL      |
| IKZF1 | PCBP2     |
| IKZF1 | PCM1      |
| IKZF1 | PDCD6     |
| IKZF1 | PDE12     |
| IKZF1 | PDLIM2    |
| IKZF1 | PDPK1     |
| IKZF1 | PFDN5     |
| IKZF1 | PHF14     |
| IKZF1 | PHF23     |
| IKZF1 | PHTF1     |
| IKZF1 | PIGN      |
| IKZF1 | PIG0      |
| IKZF1 | PIK3C3    |
| IKZF1 | PIK3CA    |
| IKZF1 | PIK3R1    |
| IKZF1 | PKM       |
| IKZF1 | PLEKHA3   |
| IKZF1 | PLEKHG1   |
| IKZF1 | PLPP6     |
| IKZF1 | PMPCB     |
| IKZF1 | PNISR     |
| IKZF1 | PNPLA4    |
| IKZF1 | POGK      |
| IKZF1 | POLQ      |
| IKZF1 | POLR2C    |
| IKZF1 | POLR2F    |
| IKZF1 | POLR2J    |
| IKZF1 | POMP      |
| IKZF1 | PPHLN1    |
| IKZF1 | PPIG      |
| IKZF1 | PPM1G     |
| IKZF1 | PPP1R12A  |
| IKZF1 | PPP4C     |
| IKZF1 | PRKACB    |
| IKZF1 | PRKCD     |
| IKZF1 | PRPF38B   |
| IKZF1 | PRPF40A   |
| IKZF1 | PRPF4B    |
| IKZF1 | PRPF6     |
| IKZF1 | PRR14L    |
| IKZF1 | PSMA3-AS1 |
| IKZF1 | PSMA4     |
| IKZF1 | PSMB1     |
| IKZF1 | PSMB3     |
| IKZF1 | PSMB7     |

|       |         |
|-------|---------|
| IKZF1 | PSMB8   |
| IKZF1 | PSMC6   |
| IKZF1 | PSMD3   |
| IKZF1 | PSMD8   |
| IKZF1 | PSMF1   |
| IKZF1 | PTBP3   |
| IKZF1 | PTPN1   |
| IKZF1 | PTPN7   |
| IKZF1 | PTPRC   |
| IKZF1 | PYCARD  |
| IKZF1 | RAB11A  |
| IKZF1 | RAB2A   |
| IKZF1 | RAB5C   |
| IKZF1 | RAB8A   |
| IKZF1 | RABEPK  |
| IKZF1 | RABGEF1 |
| IKZF1 | RAC1    |
| IKZF1 | RAC2    |
| IKZF1 | RACK1   |
| IKZF1 | RAD51D  |
| IKZF1 | RALA    |
| IKZF1 | RASA1   |
| IKZF1 | RASGRP2 |
| IKZF1 | RASGRP3 |
| IKZF1 | RFTN1   |
| IKZF1 | RHOG    |
| IKZF1 | RHOT2   |
| IKZF1 | RIC8A   |
| IKZF1 | RMND5B  |
| IKZF1 | RNF121  |
| IKZF1 | RNF168  |
| IKZF1 | RNF20   |
| IKZF1 | RNF214  |
| IKZF1 | RNPS1   |
| IKZF1 | ROCK1   |
| IKZF1 | ROM01   |
| IKZF1 | RPE     |
| IKZF1 | RPF2    |
| IKZF1 | RPL11   |
| IKZF1 | RPL19   |
| IKZF1 | RPL23   |
| IKZF1 | RPL26   |
| IKZF1 | RPL27   |
| IKZF1 | RPL28   |
| IKZF1 | RPL29   |
| IKZF1 | RPL30   |
| IKZF1 | RPL31   |
| IKZF1 | RPL32   |
| IKZF1 | RPL34   |
| IKZF1 | RPL38   |

|       |          |
|-------|----------|
| IKZF1 | RPL4     |
| IKZF1 | RPL41    |
| IKZF1 | RPL6     |
| IKZF1 | RPL7     |
| IKZF1 | RPL8     |
| IKZF1 | RPS13    |
| IKZF1 | RPS18    |
| IKZF1 | RPS25    |
| IKZF1 | RPS8     |
| IKZF1 | RRAGA    |
| IKZF1 | RRAGB    |
| IKZF1 | RRN3     |
| IKZF1 | RTN4     |
| IKZF1 | S100A4   |
| IKZF1 | SAMSN1   |
| IKZF1 | SART3    |
| IKZF1 | SC0C     |
| IKZF1 | SDHAF2   |
| IKZF1 | SDHD     |
| IKZF1 | SDR42E1  |
| IKZF1 | SEC23IP  |
| IKZF1 | SEC24C   |
| IKZF1 | SEMA4A   |
| IKZF1 | SERBP1   |
| IKZF1 | SETX     |
| IKZF1 | SF1      |
| IKZF1 | SF3A1    |
| IKZF1 | SF3B1    |
| IKZF1 | SF3B2    |
| IKZF1 | SH3BGRL  |
| IKZF1 | SH3BP5   |
| IKZF1 | SHKBP1   |
| IKZF1 | SHQ1     |
| IKZF1 | SIKE1    |
| IKZF1 | SLC35B3  |
| IKZF1 | SLC37A1  |
| IKZF1 | SLC38A1  |
| IKZF1 | SLC39A1  |
| IKZF1 | SLC9A3R1 |
| IKZF1 | SLF1     |
| IKZF1 | SLMAP    |
| IKZF1 | SMARCA2  |
| IKZF1 | SMC2     |
| IKZF1 | SMC4     |
| IKZF1 | SMCHD1   |
| IKZF1 | SMIM15   |
| IKZF1 | SMIM7    |
| IKZF1 | SNAP23   |
| IKZF1 | SNF8     |
| IKZF1 | SNIP1    |



|       |          |
|-------|----------|
| IKZF1 | SNRNP200 |
| IKZF1 | SNRPB    |
| IKZF1 | SNRPE    |
| IKZF1 | SNX10    |
| IKZF1 | SNX3     |
| IKZF1 | SP100    |
| IKZF1 | SPATA2   |
| IKZF1 | SPG21    |
| IKZF1 | SPI1     |
| IKZF1 | SPN      |
| IKZF1 | SPTLC2   |
| IKZF1 | SRP14    |
| IKZF1 | SRP54    |
| IKZF1 | SRRM1    |
| IKZF1 | SRSF4    |
| IKZF1 | SS18     |
| IKZF1 | STAP1    |
| IKZF1 | STAU1    |
| IKZF1 | STK4     |
| IKZF1 | STX10    |
| IKZF1 | SUB1     |
| IKZF1 | SUPT4H1  |
| IKZF1 | SYAP1    |
| IKZF1 | SYF2     |
| IKZF1 | SYK      |
| IKZF1 | SYMPK    |
| IKZF1 | TAC01    |
| IKZF1 | TAF10    |
| IKZF1 | TAF11    |
| IKZF1 | TAGAP    |
| IKZF1 | TAGLN2   |
| IKZF1 | TANK     |
| IKZF1 | TBC1D1   |
| IKZF1 | TBC1D22A |
| IKZF1 | TBK1     |
| IKZF1 | TBRG4    |
| IKZF1 | TCF25    |
| IKZF1 | TCF4     |
| IKZF1 | TEFM     |
| IKZF1 | TESPA1   |
| IKZF1 | TFB1M    |
| IKZF1 | TFB2M    |
| IKZF1 | TFRC     |
| IKZF1 | TGOLN2   |
| IKZF1 | THAP11   |
| IKZF1 | THAP4    |
| IKZF1 | THG1L    |
| IKZF1 | THOC5    |
| IKZF1 | TIMM23   |
| IKZF1 | TIMM8B   |

|       |          |
|-------|----------|
| IKZF1 | TIMMDC1  |
| IKZF1 | TINF2    |
| IKZF1 | TMA7     |
| IKZF1 | TMEM101  |
| IKZF1 | TMEM128  |
| IKZF1 | TMEM161B |
| IKZF1 | TMEM206  |
| IKZF1 | TMEM243  |
| IKZF1 | TMX1     |
| IKZF1 | TNFAIP8  |
| IKZF1 | TNP03    |
| IKZF1 | TNRC6A   |
| IKZF1 | TOR4A    |
| IKZF1 | TPRKB    |
| IKZF1 | TRA2B    |
| IKZF1 | TRAF3IP3 |
| IKZF1 | TRAM2    |
| IKZF1 | TRAPPC4  |
| IKZF1 | TRIM22   |
| IKZF1 | TRNT1    |
| IKZF1 | TRPC4AP  |
| IKZF1 | TSC2     |
| IKZF1 | TSC22D4  |
| IKZF1 | TSNAX    |
| IKZF1 | TSSC4    |
| IKZF1 | TSTD1    |
| IKZF1 | TTC14    |
| IKZF1 | TTF2     |
| IKZF1 | TUBB     |
| IKZF1 | TUBGCP2  |
| IKZF1 | TUBGCP4  |
| IKZF1 | TYW1     |
| IKZF1 | UBA1     |
| IKZF1 | UBAP2    |
| IKZF1 | UBE2E1   |
| IKZF1 | UBE2L3   |
| IKZF1 | UBL5     |
| IKZF1 | UBXN1    |
| IKZF1 | UBXN4    |
| IKZF1 | UBXN6    |
| IKZF1 | UHMK1    |
| IKZF1 | UPF2     |
| IKZF1 | UQCR11   |
| IKZF1 | URM1     |
| IKZF1 | USE1     |
| IKZF1 | USP16    |
| IKZF1 | USP8     |
| IKZF1 | UTP3     |
| IKZF1 | UTP4     |
| IKZF1 | UVRAG    |

|       |         |
|-------|---------|
| IKZF1 | VAC14   |
| IKZF1 | VAMP8   |
| IKZF1 | VEZF1   |
| IKZF1 | VMA21   |
| IKZF1 | VMP1    |
| IKZF1 | VNN2    |
| IKZF1 | VPS18   |
| IKZF1 | VPS51   |
| IKZF1 | VPS8    |
| IKZF1 | WASF2   |
| IKZF1 | WDR41   |
| IKZF1 | WDR73   |
| IKZF1 | XRN2    |
| IKZF1 | YBEY    |
| IKZF1 | YKT6    |
| IKZF1 | YTHDF3  |
| IKZF1 | ZBTB11  |
| IKZF1 | ZBTB7A  |
| IKZF1 | ZC3H12D |
| IKZF1 | ZDHHC6  |
| IKZF1 | ZFC3H1  |
| IKZF1 | ZFP90   |
| IKZF1 | ZMAT2   |
| IKZF1 | ZNF18   |
| IKZF1 | ZNF197  |
| IKZF1 | ZNF226  |
| IKZF1 | ZNF234  |
| IKZF1 | ZNF24   |
| IKZF1 | ZNF275  |
| IKZF1 | ZNF317  |
| IKZF1 | ZNF397  |
| IKZF1 | ZNF485  |
| IKZF1 | ZNF511  |
| IKZF1 | ZNF579  |
| IKZF1 | ZNF653  |
| IKZF1 | ZNF83   |
| IKZF1 | ZRANB2  |
| IRF1  | ABCB8   |
| IRF1  | ABCC4   |
| IRF1  | ABCD4   |
| IRF1  | ABHD14A |
| IRF1  | ABI2    |
| IRF1  | ABTB1   |
| IRF1  | ACAA1   |
| IRF1  | ACADVL  |
| IRF1  | ACAP1   |
| IRF1  | ACBD3   |
| IRF1  | ACP6    |
| IRF1  | ACSS1   |
| IRF1  | ADAM28  |

|      |          |
|------|----------|
| IRF1 | ADAR     |
| IRF1 | ADD1     |
| IRF1 | ADIPOR1  |
| IRF1 | AEBP1    |
| IRF1 | AFF1     |
| IRF1 | AFF4     |
| IRF1 | AGBL5    |
| IRF1 | AKAP1    |
| IRF1 | AKAP13   |
| IRF1 | AKAP8    |
| IRF1 | AKAP9    |
| IRF1 | AKIRIN2  |
| IRF1 | AKT2     |
| IRF1 | ALDH18A1 |
| IRF1 | ALDH5A1  |
| IRF1 | ALG11    |
| IRF1 | ALG14    |
| IRF1 | ALG2     |
| IRF1 | ALG3     |
| IRF1 | ALG5     |
| IRF1 | ALKBH7   |
| IRF1 | AMZ2     |
| IRF1 | ANAPC13  |
| IRF1 | ANG      |
| IRF1 | ANKRD11  |
| IRF1 | ANKRD12  |
| IRF1 | ANKRD16  |
| IRF1 | ANKRD28  |
| IRF1 | ANKRD46  |
| IRF1 | AN09     |
| IRF1 | ANXA6    |
| IRF1 | AP3D1    |
| IRF1 | AP4B1    |
| IRF1 | APBA3    |
| IRF1 | APMAP    |
| IRF1 | ARCN1    |
| IRF1 | AREG     |
| IRF1 | ARF4     |
| IRF1 | ARFGAP3  |
| IRF1 | ARID4A   |
| IRF1 | ARL6IP5  |
| IRF1 | ARMCX3   |
| IRF1 | ARMCX5   |
| IRF1 | ARRDC3   |
| IRF1 | ARSA     |
| IRF1 | ASL      |
| IRF1 | ATF6     |
| IRF1 | ATF6B    |
| IRF1 | ATG12    |
| IRF1 | ATG16L1  |

|      |           |
|------|-----------|
| IRF1 | ATG5      |
| IRF1 | ATP13A1   |
| IRF1 | ATP23     |
| IRF1 | ATP2A2    |
| IRF1 | ATP6AP2   |
| IRF1 | ATP6V0A1  |
| IRF1 | ATP6V1A   |
| IRF1 | ATP6V1E1  |
| IRF1 | ATP8B2    |
| IRF1 | ATRAID    |
| IRF1 | ATXN7L3B  |
| IRF1 | AUH       |
| IRF1 | AZI2      |
| IRF1 | AZIN1     |
| IRF1 | B2M       |
| IRF1 | B3GNT2    |
| IRF1 | B4GALT3   |
| IRF1 | BAK1      |
| IRF1 | BANK1     |
| IRF1 | BAZ2A     |
| IRF1 | BAZ2B     |
| IRF1 | BBX       |
| IRF1 | BCKDK     |
| IRF1 | BCL2L11   |
| IRF1 | BECN1     |
| IRF1 | BET1L     |
| IRF1 | BEX4      |
| IRF1 | BEX5      |
| IRF1 | BHLHE41   |
| IRF1 | BID       |
| IRF1 | BIN2      |
| IRF1 | BLVRB     |
| IRF1 | BNIP3L    |
| IRF1 | BORCS6    |
| IRF1 | BRI3      |
| IRF1 | BSDC1     |
| IRF1 | BTG1      |
| IRF1 | BTG2      |
| IRF1 | BTK       |
| IRF1 | C12orf29  |
| IRF1 | C12orf57  |
| IRF1 | C12orf65  |
| IRF1 | C14orf28  |
| IRF1 | C15orf39  |
| IRF1 | C15orf61  |
| IRF1 | C19orf24  |
| IRF1 | C19orf38  |
| IRF1 | C19orf66  |
| IRF1 | C1GALT1C1 |
| IRF1 | C21orf2   |

|      |          |
|------|----------|
| IRF1 | C6orf47  |
| IRF1 | C6orf89  |
| IRF1 | C8orf82  |
| IRF1 | CADPS    |
| IRF1 | CALCOC01 |
| IRF1 | CALR     |
| IRF1 | CALU     |
| IRF1 | CAMLG    |
| IRF1 | CANX     |
| IRF1 | CAPN10   |
| IRF1 | CAPN12   |
| IRF1 | CARNMT1  |
| IRF1 | CASP3    |
| IRF1 | CASP8    |
| IRF1 | CBFA2T2  |
| IRF1 | CBX2     |
| IRF1 | CBX4     |
| IRF1 | CBX7     |
| IRF1 | CBX8     |
| IRF1 | CCDC107  |
| IRF1 | CCDC14   |
| IRF1 | CCDC144A |
| IRF1 | CCDC159  |
| IRF1 | CCDC186  |
| IRF1 | CCDC47   |
| IRF1 | CCDC71L  |
| IRF1 | CCNL1    |
| IRF1 | CCP110   |
| IRF1 | CCPG1    |
| IRF1 | CCR7     |
| IRF1 | CD164    |
| IRF1 | CD37     |
| IRF1 | CD38     |
| IRF1 | CD46     |
| IRF1 | CD55     |
| IRF1 | CD63     |
| IRF1 | CD69     |
| IRF1 | CD79B    |
| IRF1 | CDC23    |
| IRF1 | CDCA5    |
| IRF1 | CDK12    |
| IRF1 | CDK2AP2  |
| IRF1 | CEBPB    |
| IRF1 | CELF2    |
| IRF1 | CHAC1    |
| IRF1 | CHD6     |
| IRF1 | CHD9     |
| IRF1 | CHID1    |
| IRF1 | CHMP3    |
| IRF1 | CHPF     |

|      |            |
|------|------------|
| IRF1 | CHPF2      |
| IRF1 | CHRN1      |
| IRF1 | CHST12     |
| IRF1 | CHST2      |
| IRF1 | CIR1       |
| IRF1 | CISD2      |
| IRF1 | CITED2     |
| IRF1 | CKAP4      |
| IRF1 | CLIC1      |
| IRF1 | CLINT1     |
| IRF1 | CLIP4      |
| IRF1 | CLK1       |
| IRF1 | CLK4       |
| IRF1 | CLN5       |
| IRF1 | CLPTM1     |
| IRF1 | CLPTM1L    |
| IRF1 | CLPX       |
| IRF1 | CNNM3      |
| IRF1 | CNPY3      |
| IRF1 | COASY      |
| IRF1 | COBLL1     |
| IRF1 | COG1       |
| IRF1 | COG3       |
| IRF1 | COPA       |
| IRF1 | COPB2      |
| IRF1 | COPE       |
| IRF1 | COPG1      |
| IRF1 | COPZ1      |
| IRF1 | COQ10A     |
| IRF1 | COQ10B     |
| IRF1 | COR01C     |
| IRF1 | COX7A2     |
| IRF1 | CPEB4      |
| IRF1 | CPQ        |
| IRF1 | CPT2       |
| IRF1 | CREB3      |
| IRF1 | CREB3L2    |
| IRF1 | CREBRF     |
| IRF1 | CRELD2     |
| IRF1 | CRIP1      |
| IRF1 | CRTC2      |
| IRF1 | CSGALNACT2 |
| IRF1 | CSNK1E     |
| IRF1 | CSRNP1     |
| IRF1 | CSRNP1     |
| IRF1 | CTNBP1     |
| IRF1 | CUL4B      |
| IRF1 | CUTA       |
| IRF1 | CXCR4      |
| IRF1 | CXorf40B   |

|      |         |
|------|---------|
| IRF1 | CYB561  |
| IRF1 | CYB5A   |
| IRF1 | CYB5R4  |
| IRF1 | CYBA    |
| IRF1 | CYHR1   |
| IRF1 | CYTH2   |
| IRF1 | CYTH4   |
| IRF1 | CYTIP   |
| IRF1 | DAD1    |
| IRF1 | DAP     |
| IRF1 | DCAF10  |
| IRF1 | DDIT4   |
| IRF1 | DDOST   |
| IRF1 | DDRKG1  |
| IRF1 | DDT     |
| IRF1 | DENND1B |
| IRF1 | DENND1C |
| IRF1 | DERL1   |
| IRF1 | DERL2   |
| IRF1 | DERL3   |
| IRF1 | DESI1   |
| IRF1 | DHPS    |
| IRF1 | DHRS3   |
| IRF1 | DHX36   |
| IRF1 | DIS3    |
| IRF1 | DNAJB9  |
| IRF1 | DNAJC1  |
| IRF1 | DNAJC10 |
| IRF1 | DNAJC14 |
| IRF1 | DNAJC18 |
| IRF1 | DNAJC25 |
| IRF1 | DNAJC3  |
| IRF1 | DNAJC4  |
| IRF1 | DNASE2  |
| IRF1 | DPM2    |
| IRF1 | DPM3    |
| IRF1 | DPY19L4 |
| IRF1 | DRAP1   |
| IRF1 | DUSP1   |
| IRF1 | DUSP5   |
| IRF1 | DVL3    |
| IRF1 | E2F5    |
| IRF1 | EAPP    |
| IRF1 | EBAG9   |
| IRF1 | EDEM2   |
| IRF1 | EDEM3   |
| IRF1 | EEF1D   |
| IRF1 | EIF1AY  |
| IRF1 | EIF2A   |
| IRF1 | EIF2AK2 |



|      |          |
|------|----------|
| IRF1 | EIF2AK4  |
| IRF1 | EIF4G1   |
| IRF1 | ELF2     |
| IRF1 | ELL      |
| IRF1 | ELL2     |
| IRF1 | ELM01    |
| IRF1 | ELMOD2   |
| IRF1 | ELOVL1   |
| IRF1 | EMC10    |
| IRF1 | EMC2     |
| IRF1 | EMC3     |
| IRF1 | EMC7     |
| IRF1 | ENTPD1   |
| IRF1 | ENTPD4   |
| IRF1 | EPB41    |
| IRF1 | ERC1     |
| IRF1 | ERCC1    |
| IRF1 | ERGIC1   |
| IRF1 | ERGIC2   |
| IRF1 | ERGIC3   |
| IRF1 | ERLEC1   |
| IRF1 | ERN1     |
| IRF1 | ER01B    |
| IRF1 | ERP29    |
| IRF1 | ETV7     |
| IRF1 | EVI2B    |
| IRF1 | EXD2     |
| IRF1 | FADS2    |
| IRF1 | FAM117A  |
| IRF1 | FAM118A  |
| IRF1 | FAM161A  |
| IRF1 | FAM173A  |
| IRF1 | FAM174A  |
| IRF1 | FAM177A1 |
| IRF1 | FAM214A  |
| IRF1 | FAM3A    |
| IRF1 | FAM3C    |
| IRF1 | FAM50A   |
| IRF1 | FAM50B   |
| IRF1 | FAM78A   |
| IRF1 | FAM86C1  |
| IRF1 | FAM89B   |
| IRF1 | FAM96A   |
| IRF1 | FAR1     |
| IRF1 | FASTK    |
| IRF1 | FBXL8    |
| IRF1 | FBX08    |
| IRF1 | FBXW5    |
| IRF1 | FBXW7    |
| IRF1 | FICD     |

|      |         |
|------|---------|
| IRF1 | FKBP14  |
| IRF1 | FKBP2   |
| IRF1 | FKBP7   |
| IRF1 | FMNL1   |
| IRF1 | FNBP4   |
| IRF1 | FNDC3A  |
| IRF1 | FOS     |
| IRF1 | FOXJ3   |
| IRF1 | FOXO3   |
| IRF1 | FRG1    |
| IRF1 | FTH1    |
| IRF1 | FTL     |
| IRF1 | FUT8    |
| IRF1 | FXYD5   |
| IRF1 | GAB1    |
| IRF1 | GABPB2  |
| IRF1 | GALK2   |
| IRF1 | GALNS   |
| IRF1 | GALT    |
| IRF1 | GANAB   |
| IRF1 | GAS6    |
| IRF1 | GBA2    |
| IRF1 | GBF1    |
| IRF1 | GBP4    |
| IRF1 | GCC2    |
| IRF1 | GEMIN7  |
| IRF1 | GFER    |
| IRF1 | GFPT1   |
| IRF1 | GGCX    |
| IRF1 | GLCCI1  |
| IRF1 | GLG1    |
| IRF1 | GLRX    |
| IRF1 | GLS     |
| IRF1 | GMCL1   |
| IRF1 | GMPPA   |
| IRF1 | GMPPB   |
| IRF1 | GMPR    |
| IRF1 | GNG7    |
| IRF1 | GNL3    |
| IRF1 | GOLGA1  |
| IRF1 | GOLGA5  |
| IRF1 | GOLGB1  |
| IRF1 | GOSR2   |
| IRF1 | GPAA1   |
| IRF1 | GPD2    |
| IRF1 | GPER1   |
| IRF1 | GPR137B |
| IRF1 | GPR89A  |
| IRF1 | GPS1    |
| IRF1 | GPT2    |

|      |          |
|------|----------|
| IRF1 | GRAP2    |
| IRF1 | GRK2     |
| IRF1 | GRN      |
| IRF1 | GSK3A    |
| IRF1 | GTF2A1   |
| IRF1 | GTF2B    |
| IRF1 | H1F0     |
| IRF1 | HAX1     |
| IRF1 | HBP1     |
| IRF1 | HCFC1    |
| IRF1 | HDLBP    |
| IRF1 | HEBP2    |
| IRF1 | HELB     |
| IRF1 | HERPUD1  |
| IRF1 | HERPUD2  |
| IRF1 | HID1     |
| IRF1 | HIP1     |
| IRF1 | HIST1H1C |
| IRF1 | HLA-A    |
| IRF1 | HLA-B    |
| IRF1 | HLA-E    |
| IRF1 | HLA-F    |
| IRF1 | HM13     |
| IRF1 | HNRNPUL2 |
| IRF1 | HPF1     |
| IRF1 | HS2ST1   |
| IRF1 | HSCB     |
| IRF1 | HSD17B11 |
| IRF1 | HSD17B12 |
| IRF1 | HSP90B1  |
| IRF1 | HSPA13   |
| IRF1 | HSPA5    |
| IRF1 | HYOU1    |
| IRF1 | ICAM1    |
| IRF1 | ICAM3    |
| IRF1 | IDH2     |
| IRF1 | IDH3G    |
| IRF1 | IER2     |
| IRF1 | IER3IP1  |
| IRF1 | IFI35    |
| IRF1 | IFNAR1   |
| IRF1 | IFNAR2   |
| IRF1 | IFT27    |
| IRF1 | IGBP1    |
| IRF1 | IGSF8    |
| IRF1 | IKBIP    |
| IRF1 | IKZF4    |
| IRF1 | IL12RB1  |
| IRF1 | IL15RA   |
| IRF1 | IL16     |

|      |           |
|------|-----------|
| IRF1 | IL2RG     |
| IRF1 | INSIG2    |
| IRF1 | IRF1      |
| IRF1 | IRF2      |
| IRF1 | IRF4      |
| IRF1 | IRF7      |
| IRF1 | ISCA2     |
| IRF1 | ISCU      |
| IRF1 | ISG20     |
| IRF1 | ISOC2     |
| IRF1 | ITCH      |
| IRF1 | ITFG1     |
| IRF1 | ITFG2     |
| IRF1 | ITGB2     |
| IRF1 | ITGB7     |
| IRF1 | ITM2B     |
| IRF1 | ITM2C     |
| IRF1 | JAGN1     |
| IRF1 | JMY       |
| IRF1 | JUN       |
| IRF1 | JUNB      |
| IRF1 | KCNA3     |
| IRF1 | KCNAB2    |
| IRF1 | KCNK6     |
| IRF1 | KDEL1     |
| IRF1 | KDEL2     |
| IRF1 | KDM5A     |
| IRF1 | KDM5D     |
| IRF1 | KIAA0930  |
| IRF1 | KLF13     |
| IRF1 | KLF2      |
| IRF1 | KLF3      |
| IRF1 | KLF6      |
| IRF1 | KLHL24    |
| IRF1 | KMT2E     |
| IRF1 | KMT2E-AS1 |
| IRF1 | KRT18     |
| IRF1 | KRTCAP2   |
| IRF1 | LACTB     |
| IRF1 | LACTB2    |
| IRF1 | LAMP2     |
| IRF1 | LAPTM4A   |
| IRF1 | LARP1B    |
| IRF1 | LEPROT    |
| IRF1 | LEPROTL1  |
| IRF1 | LGALS8    |
| IRF1 | LIN54     |
| IRF1 | LINC00667 |
| IRF1 | LINC00909 |
| IRF1 | LINC01485 |

|      |          |
|------|----------|
| IRF1 | LIPT2    |
| IRF1 | LITAF    |
| IRF1 | LIX1L    |
| IRF1 | LMAN1    |
| IRF1 | LMAN2    |
| IRF1 | LMBRD1   |
| IRF1 | LMF1     |
| IRF1 | LMF2     |
| IRF1 | LMTK2    |
| IRF1 | LONRF1   |
| IRF1 | LRBA     |
| IRF1 | LRP10    |
| IRF1 | LRPAP1   |
| IRF1 | LRRC59   |
| IRF1 | LSM1     |
| IRF1 | LY75     |
| IRF1 | LY96     |
| IRF1 | LZTFL1   |
| IRF1 | MAD2L2   |
| IRF1 | MAEA     |
| IRF1 | MAFB     |
| IRF1 | MAGED1   |
| IRF1 | MAGEH1   |
| IRF1 | MAGT1    |
| IRF1 | MAN1A2   |
| IRF1 | MAN2A1   |
| IRF1 | MANBA    |
| IRF1 | MANBAL   |
| IRF1 | MANEA    |
| IRF1 | MANF     |
| IRF1 | MAP1B    |
| IRF1 | MAP4K3   |
| IRF1 | MAPKAPK2 |
| IRF1 | MAPKAPK3 |
| IRF1 | MARCH6   |
| IRF1 | MARCH9   |
| IRF1 | MARK3    |
| IRF1 | MAT2B    |
| IRF1 | MBNL2    |
| IRF1 | MBTD1    |
| IRF1 | MCFD2    |
| IRF1 | MCL1     |
| IRF1 | MCTP2    |
| IRF1 | MDN1     |
| IRF1 | MED13L   |
| IRF1 | MED31    |
| IRF1 | MEF2A    |
| IRF1 | MEF2C    |
| IRF1 | METTTL17 |
| IRF1 | METTTL23 |

|      |           |
|------|-----------|
| IRF1 | METTTL7A  |
| IRF1 | MFF       |
| IRF1 | MGAT1     |
| IRF1 | MIA3      |
| IRF1 | MLEC      |
| IRF1 | MLX       |
| IRF1 | MMP17     |
| IRF1 | MOC52     |
| IRF1 | MOGS      |
| IRF1 | MORC2-AS1 |
| IRF1 | MOSPD1    |
| IRF1 | MPC1      |
| IRF1 | MPHOSPH8  |
| IRF1 | MPRIP     |
| IRF1 | MPV17     |
| IRF1 | MRPL17    |
| IRF1 | MRPL24    |
| IRF1 | MRPL52    |
| IRF1 | MRPS31    |
| IRF1 | MRPS34    |
| IRF1 | MST01     |
| IRF1 | MT1F      |
| IRF1 | MTDH      |
| IRF1 | MTG1      |
| IRF1 | MTG2      |
| IRF1 | MTHFSD    |
| IRF1 | MVP       |
| IRF1 | MXD4      |
| IRF1 | MYCBP2    |
| IRF1 | MYDGF     |
| IRF1 | MZB1      |
| IRF1 | MZF1      |
| IRF1 | N4BP2L1   |
| IRF1 | N4BP2L2   |
| IRF1 | NAGK      |
| IRF1 | NANS      |
| IRF1 | NAPA      |
| IRF1 | NBEAL1    |
| IRF1 | NBR1      |
| IRF1 | NCK1      |
| IRF1 | NCKAP1L   |
| IRF1 | NCLN      |
| IRF1 | NCOA2     |
| IRF1 | NCSTN     |
| IRF1 | NDST2     |
| IRF1 | NDUFA8    |
| IRF1 | NDUFAF1   |
| IRF1 | NDUFB11   |
| IRF1 | NDUFV3    |
| IRF1 | NEAT1     |

|      |          |
|------|----------|
| IRF1 | NEDD9    |
| IRF1 | NET1     |
| IRF1 | NEU1     |
| IRF1 | NFATC3   |
| IRF1 | NFYB     |
| IRF1 | NGRN     |
| IRF1 | NMRK1    |
| IRF1 | NPC2     |
| IRF1 | NPRL2    |
| IRF1 | NRBF2    |
| IRF1 | NRDC     |
| IRF1 | NSUN6    |
| IRF1 | NT5C3A   |
| IRF1 | NT5DC1   |
| IRF1 | NUBP2    |
| IRF1 | NUCB2    |
| IRF1 | NUDT22   |
| IRF1 | NUDT6    |
| IRF1 | NUDT9    |
| IRF1 | NUMB     |
| IRF1 | NXPE3    |
| IRF1 | OAF      |
| IRF1 | ODF2L    |
| IRF1 | OGFOD2   |
| IRF1 | OPTN     |
| IRF1 | ORAI2    |
| IRF1 | ORAI3    |
| IRF1 | ORMDL2   |
| IRF1 | ORMDL3   |
| IRF1 | OS9      |
| IRF1 | OSBPL2   |
| IRF1 | OST4     |
| IRF1 | OSTC     |
| IRF1 | OSTF1    |
| IRF1 | OSTM1    |
| IRF1 | OXNAD1   |
| IRF1 | OXR1     |
| IRF1 | P2RX1    |
| IRF1 | P4HB     |
| IRF1 | PAFAH1B1 |
| IRF1 | PAK1     |
| IRF1 | PAPSS1   |
| IRF1 | PARM1    |
| IRF1 | PARP14   |
| IRF1 | PARVB    |
| IRF1 | PBRM1    |
| IRF1 | PBXIP1   |
| IRF1 | PCIF1    |
| IRF1 | PCMTD1   |
| IRF1 | PDE12    |

|      |         |
|------|---------|
| IRF1 | PDE4B   |
| IRF1 | PDE4DIP |
| IRF1 | PDIA3   |
| IRF1 | PDIA4   |
| IRF1 | PDIA6   |
| IRF1 | PDK1    |
| IRF1 | PDK2    |
| IRF1 | PDPK1   |
| IRF1 | PDXDC1  |
| IRF1 | PDXK    |
| IRF1 | PFDN5   |
| IRF1 | PFKL    |
| IRF1 | PGM3    |
| IRF1 | PGRMC2  |
| IRF1 | PHF1    |
| IRF1 | PHTF1   |
| IRF1 | PIAS3   |
| IRF1 | PIGH    |
| IRF1 | PIGS    |
| IRF1 | PIGT    |
| IRF1 | PIK3C3  |
| IRF1 | PIK3CG  |
| IRF1 | PIK3IP1 |
| IRF1 | PIM2    |
| IRF1 | PINK1   |
| IRF1 | PJA2    |
| IRF1 | PLCG2   |
| IRF1 | PLD3    |
| IRF1 | PLEKHA3 |
| IRF1 | PLEKHG1 |
| IRF1 | PLEKHH3 |
| IRF1 | PLOD1   |
| IRF1 | PLOD3   |
| IRF1 | PLP2    |
| IRF1 | PLTP    |
| IRF1 | PML     |
| IRF1 | PNISR   |
| IRF1 | PNOC    |
| IRF1 | PNPLA2  |
| IRF1 | PNPLA8  |
| IRF1 | PNRC1   |
| IRF1 | POLE2   |
| IRF1 | POLQ    |
| IRF1 | POLR1D  |
| IRF1 | POLR3E  |
| IRF1 | PPCDC   |
| IRF1 | PPIG    |
| IRF1 | PPM1K   |
| IRF1 | PPP2R5B |
| IRF1 | PQBP1   |



|      |          |
|------|----------|
| IRF1 | PRDX4    |
| IRF1 | PREX1    |
| IRF1 | PRKAG1   |
| IRF1 | PRKCB    |
| IRF1 | PRKCSH   |
| IRF1 | PRKD2    |
| IRF1 | PRKX     |
| IRF1 | PRPF38B  |
| IRF1 | PRRC1    |
| IRF1 | PSAP     |
| IRF1 | PSENE1   |
| IRF1 | PSMA5    |
| IRF1 | PSMB9    |
| IRF1 | PSMD13   |
| IRF1 | PSME1    |
| IRF1 | PSME2    |
| IRF1 | PTAR1    |
| IRF1 | PTPN1    |
| IRF1 | PTPRN2   |
| IRF1 | PUS3     |
| IRF1 | PYCARD   |
| IRF1 | PYM1     |
| IRF1 | PYURF    |
| IRF1 | QPCT     |
| IRF1 | QPCTL    |
| IRF1 | R3HCC1   |
| IRF1 | RAB11B   |
| IRF1 | RAB1A    |
| IRF1 | RAB22A   |
| IRF1 | RAB28    |
| IRF1 | RAB3GAP1 |
| IRF1 | RAB40B   |
| IRF1 | RAB6A    |
| IRF1 | RAB8A    |
| IRF1 | RABAC1   |
| IRF1 | RABEP2   |
| IRF1 | RABGAP1  |
| IRF1 | RABGGTA  |
| IRF1 | RAD54L2  |
| IRF1 | RAD9A    |
| IRF1 | RASGRP2  |
| IRF1 | RASSF1   |
| IRF1 | RB1CC1   |
| IRF1 | RBL2     |
| IRF1 | RBM33    |
| IRF1 | RBM4     |
| IRF1 | RBM45    |
| IRF1 | RBM48    |
| IRF1 | RCBTB1   |
| IRF1 | RCSD1    |

|      |         |
|------|---------|
| IRF1 | RER1    |
| IRF1 | RERE    |
| IRF1 | RFXAP   |
| IRF1 | RGS2    |
| IRF1 | RICTOR  |
| IRF1 | RNASE6  |
| IRF1 | RNASET2 |
| IRF1 | RNF111  |
| IRF1 | RNF113A |
| IRF1 | RNF13   |
| IRF1 | RNF14   |
| IRF1 | RNF149  |
| IRF1 | RNF185  |
| IRF1 | RNF213  |
| IRF1 | RNF32   |
| IRF1 | RNF5    |
| IRF1 | RNPEPL1 |
| IRF1 | RPL10   |
| IRF1 | RPL18A  |
| IRF1 | RPL36AL |
| IRF1 | RPLP1   |
| IRF1 | RPS11   |
| IRF1 | RPS19   |
| IRF1 | RPS27   |
| IRF1 | RPS5    |
| IRF1 | RPS6KA3 |
| IRF1 | RPS6KA5 |
| IRF1 | RPS6KB2 |
| IRF1 | RRAGC   |
| IRF1 | RRBP1   |
| IRF1 | RRP36   |
| IRF1 | RSBN1L  |
| IRF1 | RSRP1   |
| IRF1 | RTN3    |
| IRF1 | RWDD2A  |
| IRF1 | SAMD4B  |
| IRF1 | SAMD9L  |
| IRF1 | SAP30   |
| IRF1 | SAR1A   |
| IRF1 | SAR1B   |
| IRF1 | SARAF   |
| IRF1 | SAT1    |
| IRF1 | SBDS    |
| IRF1 | SBF1    |
| IRF1 | SCAF1   |
| IRF1 | SCAI    |
| IRF1 | SCAMP2  |
| IRF1 | SCARB2  |
| IRF1 | SCFD1   |
| IRF1 | SCPEP1  |

|      |           |
|------|-----------|
| IRF1 | SCRN3     |
| IRF1 | SDCBP2    |
| IRF1 | SDF2L1    |
| IRF1 | SDF4      |
| IRF1 | SDHAF1    |
| IRF1 | SEC11C    |
| IRF1 | SEC13     |
| IRF1 | SEC14L1   |
| IRF1 | SEC23B    |
| IRF1 | SEC24A    |
| IRF1 | SEC24C    |
| IRF1 | SEC24D    |
| IRF1 | SEC31A    |
| IRF1 | SEC61A1   |
| IRF1 | SEC61B    |
| IRF1 | SEC61G    |
| IRF1 | SEC63     |
| IRF1 | SECISBP2L |
| IRF1 | SEL1L     |
| IRF1 | SEPT2     |
| IRF1 | SEPT6     |
| IRF1 | SERINC3   |
| IRF1 | SERPINI1  |
| IRF1 | SERTAD3   |
| IRF1 | SESN3     |
| IRF1 | SETD4     |
| IRF1 | SF3B2     |
| IRF1 | SF3B5     |
| IRF1 | SFT2D1    |
| IRF1 | SFXN2     |
| IRF1 | SGK1      |
| IRF1 | SIL1      |
| IRF1 | SIRT2     |
| IRF1 | SLC17A9   |
| IRF1 | SLC1A4    |
| IRF1 | SLC25A15  |
| IRF1 | SLC25A22  |
| IRF1 | SLC25A25  |
| IRF1 | SLC25A42  |
| IRF1 | SLC25A51  |
| IRF1 | SLC30A7   |
| IRF1 | SLC33A1   |
| IRF1 | SLC35A1   |
| IRF1 | SLC35C1   |
| IRF1 | SLC35C2   |
| IRF1 | SLC38A10  |
| IRF1 | SLC38A2   |
| IRF1 | SLC39A4   |
| IRF1 | SLC50A1   |
| IRF1 | SLC52A2   |

|      |            |
|------|------------|
| IRF1 | SLC9A3R1   |
| IRF1 | SMCHD1     |
| IRF1 | SMIM7      |
| IRF1 | SMPD1      |
| IRF1 | SMTN       |
| IRF1 | SMUG1      |
| IRF1 | SND1       |
| IRF1 | SNRNP200   |
| IRF1 | SNX14      |
| IRF1 | SNX2       |
| IRF1 | S0CS3      |
| IRF1 | S0CS7      |
| IRF1 | SP100      |
| IRF1 | SP140L     |
| IRF1 | SPATS2     |
| IRF1 | SPCS3      |
| IRF1 | SPG11      |
| IRF1 | SPINT2     |
| IRF1 | SPOP       |
| IRF1 | SPRED2     |
| IRF1 | SPTBN1     |
| IRF1 | SPTY2D1    |
| IRF1 | SRGN       |
| IRF1 | SRM        |
| IRF1 | SRP19      |
| IRF1 | SRP54      |
| IRF1 | SRP68      |
| IRF1 | SRP72      |
| IRF1 | SRPRA      |
| IRF1 | SSPN       |
| IRF1 | SSR1       |
| IRF1 | SSR2       |
| IRF1 | SSR3       |
| IRF1 | SSR4       |
| IRF1 | ST3GAL1    |
| IRF1 | ST6GAL1    |
| IRF1 | ST6GALNAC4 |
| IRF1 | ST8SIA4    |
| IRF1 | STAMBPL1   |
| IRF1 | STARD3     |
| IRF1 | STARD5     |
| IRF1 | STAT1      |
| IRF1 | STAT2      |
| IRF1 | STK17B     |
| IRF1 | STK4       |
| IRF1 | STX17      |
| IRF1 | STX5       |
| IRF1 | STXBP6     |
| IRF1 | SUB1       |
| IRF1 | SUN2       |

|      |          |
|------|----------|
| IRF1 | SUPT5H   |
| IRF1 | SYVN1    |
| IRF1 | TAF3     |
| IRF1 | TAGAP    |
| IRF1 | TAGLN2   |
| IRF1 | TAOK1    |
| IRF1 | TAP1     |
| IRF1 | TAP2     |
| IRF1 | TAPBP    |
| IRF1 | TAPBPL   |
| IRF1 | TARSL2   |
| IRF1 | TAX1BP1  |
| IRF1 | TBC1D10A |
| IRF1 | TBC1D20  |
| IRF1 | TBL2     |
| IRF1 | TBXAS1   |
| IRF1 | TCEAL1   |
| IRF1 | TCF20    |
| IRF1 | TCF25    |
| IRF1 | TCIRG1   |
| IRF1 | TDRD3    |
| IRF1 | TECR     |
| IRF1 | TEX264   |
| IRF1 | TFG      |
| IRF1 | TGIF1    |
| IRF1 | THAP11   |
| IRF1 | THAP2    |
| IRF1 | THEMIS2  |
| IRF1 | TIMP1    |
| IRF1 | TINF2    |
| IRF1 | TJAP1    |
| IRF1 | TJP1     |
| IRF1 | TM9SF2   |
| IRF1 | TM9SF3   |
| IRF1 | TMBIM1   |
| IRF1 | TMBIM4   |
| IRF1 | TMBIM6   |
| IRF1 | TMC01    |
| IRF1 | TMED1    |
| IRF1 | TMED10   |
| IRF1 | TMED2    |
| IRF1 | TMED3    |
| IRF1 | TMED4    |
| IRF1 | TMEM102  |
| IRF1 | TMEM106A |
| IRF1 | TMEM109  |
| IRF1 | TMEM138  |
| IRF1 | TMEM161A |
| IRF1 | TMEM184B |
| IRF1 | TMEM19   |

|      |          |
|------|----------|
| IRF1 | TMEM199  |
| IRF1 | TMEM205  |
| IRF1 | TMEM208  |
| IRF1 | TMEM230  |
| IRF1 | TMEM248  |
| IRF1 | TMEM258  |
| IRF1 | TMEM263  |
| IRF1 | TMEM39A  |
| IRF1 | TMEM41B  |
| IRF1 | TMEM50A  |
| IRF1 | TMEM50B  |
| IRF1 | TMEM59   |
| IRF1 | TMEM9    |
| IRF1 | TMEM91   |
| IRF1 | TMF1     |
| IRF1 | TMSB10   |
| IRF1 | TNFSF10  |
| IRF1 | TNRC6B   |
| IRF1 | TOLLIP   |
| IRF1 | TOMM20   |
| IRF1 | TOMM34   |
| IRF1 | TOR1B    |
| IRF1 | TP53INP1 |
| IRF1 | TPRA1    |
| IRF1 | TPST2    |
| IRF1 | TPT1     |
| IRF1 | TRABD    |
| IRF1 | TRADD    |
| IRF1 | TRAM1    |
| IRF1 | TRAM2    |
| IRF1 | TRIB1    |
| IRF1 | TRIP11   |
| IRF1 | TRPC4AP  |
| IRF1 | TSC22D1  |
| IRF1 | TSC22D3  |
| IRF1 | TSC22D4  |
| IRF1 | TSPAN13  |
| IRF1 | TSPYL2   |
| IRF1 | TSSC4    |
| IRF1 | TTC17    |
| IRF1 | TTC31    |
| IRF1 | TTC38    |
| IRF1 | TVP23B   |
| IRF1 | TXNDC11  |
| IRF1 | TXNDC5   |
| IRF1 | UAP1     |
| IRF1 | UBA5     |
| IRF1 | UBALD1   |
| IRF1 | UBB      |
| IRF1 | UBC      |

|      |        |
|------|--------|
| IRF1 | UBE2D1 |
| IRF1 | UBE2H  |
| IRF1 | UBE2J1 |
| IRF1 | UBE2L6 |
| IRF1 | UBE2Q1 |
| IRF1 | UBE2W  |
| IRF1 | UBE3B  |
| IRF1 | UBE4A  |
| IRF1 | UBL7   |
| IRF1 | UBXN4  |
| IRF1 | UCP2   |
| IRF1 | UFC1   |
| IRF1 | UFL1   |
| IRF1 | UFM1   |
| IRF1 | UFSP2  |
| IRF1 | UGDH   |
| IRF1 | UNC13D |
| IRF1 | UNC50  |
| IRF1 | UQCRQ  |
| IRF1 | UR0S   |
| IRF1 | USE1   |
| IRF1 | US01   |
| IRF1 | USP3   |
| IRF1 | USP36  |
| IRF1 | USP4   |
| IRF1 | USP46  |
| IRF1 | USP8   |
| IRF1 | UTP23  |
| IRF1 | UTRN   |
| IRF1 | UXT    |
| IRF1 | VAMP2  |
| IRF1 | VAV1   |
| IRF1 | VCP    |
| IRF1 | VDR    |
| IRF1 | VMP1   |
| IRF1 | VPS13A |
| IRF1 | WBP4   |
| IRF1 | WDFY2  |
| IRF1 | WDR25  |
| IRF1 | WDR26  |
| IRF1 | WDR45  |
| IRF1 | WDR92  |
| IRF1 | WFS1   |
| IRF1 | WIFI1  |
| IRF1 | WNT6   |
| IRF1 | XRN1   |
| IRF1 | XRRA1  |
| IRF1 | YIF1A  |
| IRF1 | YIF1B  |
| IRF1 | YIPF1  |

|      |          |
|------|----------|
| IRF1 | YIPF2    |
| IRF1 | YIPF3    |
| IRF1 | YIPF5    |
| IRF1 | YKT6     |
| IRF1 | YPEL2    |
| IRF1 | YPEL3    |
| IRF1 | YPEL5    |
| IRF1 | YTHDF2   |
| IRF1 | ZAP70    |
| IRF1 | ZBED5    |
| IRF1 | ZBP1     |
| IRF1 | ZBTB7A   |
| IRF1 | ZBTB8A   |
| IRF1 | ZC3HAV1  |
| IRF1 | ZDHH4    |
| IRF1 | ZFP36L2  |
| IRF1 | ZFPL1    |
| IRF1 | ZNF215   |
| IRF1 | ZNF224   |
| IRF1 | ZNF232   |
| IRF1 | ZNF274   |
| IRF1 | ZNF292   |
| IRF1 | ZNF322   |
| IRF1 | ZNF358   |
| IRF1 | ZNF562   |
| IRF1 | ZNF593   |
| IRF1 | ZNF638   |
| IRF1 | ZNF671   |
| IRF1 | ZNF706   |
| IRF1 | ZNF720   |
| IRF1 | ZNF771   |
| IRF1 | ZNF791   |
| IRF1 | ZNF831   |
| IRF1 | ZWILCH   |
| IRF2 | ADAR     |
| IRF2 | AKIRIN2  |
| IRF2 | ANKRD28  |
| IRF2 | APOL2    |
| IRF2 | AREG     |
| IRF2 | ARF6     |
| IRF2 | ARHGAP37 |
| IRF2 | ASAH1    |
| IRF2 | B2M      |
| IRF2 | CARD16   |
| IRF2 | CASP1    |
| IRF2 | CCR7     |
| IRF2 | CD47     |
| IRF2 | CLN5     |
| IRF2 | C0Q9     |
| IRF2 | CYSTM1   |



|      |            |
|------|------------|
| IRF2 | DEF6       |
| IRF2 | DERL1      |
| IRF2 | DNAJC1     |
| IRF2 | DTX3L      |
| IRF2 | ELK3       |
| IRF2 | ENTPD1-AS1 |
| IRF2 | EPSTI1     |
| IRF2 | ERP44      |
| IRF2 | ETV7       |
| IRF2 | FAR1       |
| IRF2 | FBXW7      |
| IRF2 | FLOT2      |
| IRF2 | FNDC3A     |
| IRF2 | FOXO3      |
| IRF2 | FXN        |
| IRF2 | FXYD5      |
| IRF2 | GPRC5C     |
| IRF2 | GRK5       |
| IRF2 | HEXB       |
| IRF2 | HIST1H3G   |
| IRF2 | HLA-A      |
| IRF2 | IRF2       |
| IRF2 | IRF7       |
| IRF2 | ITM2C      |
| IRF2 | KCNK6      |
| IRF2 | KLF9       |
| IRF2 | MAP3K14    |
| IRF2 | MFSD12     |
| IRF2 | MGAT1      |
| IRF2 | MICU1      |
| IRF2 | MR1        |
| IRF2 | MSL2       |
| IRF2 | MTG1       |
| IRF2 | MTIF3      |
| IRF2 | MVP        |
| IRF2 | MYO1G      |
| IRF2 | NCSTN      |
| IRF2 | NPRL3      |
| IRF2 | NRAS       |
| IRF2 | NT5C3A     |
| IRF2 | NUB1       |
| IRF2 | PARP14     |
| IRF2 | PARP9      |
| IRF2 | PCF11      |
| IRF2 | PELI1      |
| IRF2 | PER3       |
| IRF2 | POU2AF1    |
| IRF2 | PRDX4      |
| IRF2 | PSAP       |
| IRF2 | PSMB8-AS1  |

|      |         |
|------|---------|
| IRF2 | RASSF5  |
| IRF2 | RBMS1   |
| IRF2 | RNF213  |
| IRF2 | RPL17   |
| IRF2 | RPS12   |
| IRF2 | RPSA    |
| IRF2 | RSAD2   |
| IRF2 | RTP4    |
| IRF2 | SAT1    |
| IRF2 | SCARB2  |
| IRF2 | SETD1B  |
| IRF2 | SP100   |
| IRF2 | SPCS3   |
| IRF2 | SUB1    |
| IRF2 | SUC0    |
| IRF2 | TAB1    |
| IRF2 | TAF5L   |
| IRF2 | TAPBPL  |
| IRF2 | TGIF1   |
| IRF2 | THTPA   |
| IRF2 | TIRAP   |
| IRF2 | TMEM52B |
| IRF2 | TPST2   |
| IRF2 | TXNDC11 |
| IRF2 | UBE2E2  |
| IRF2 | UBE2J1  |
| IRF2 | UBE2L6  |
| IRF2 | UBE4B   |
| IRF2 | WBP1L   |
| IRF2 | XAF1    |
| IRF2 | ZBP1    |
| IRF2 | ZC3H4   |
| IRF2 | ZFAT    |
| IRF2 | ZFP36L1 |
| IRF3 | AACS    |
| IRF3 | AAMP    |
| IRF3 | AARS    |
| IRF3 | ABCA5   |
| IRF3 | ABCB8   |
| IRF3 | ABHD12  |
| IRF3 | ABHD17A |
| IRF3 | ACAP1   |
| IRF3 | ACAT2   |
| IRF3 | ACBD5   |
| IRF3 | ACLY    |
| IRF3 | ACOT8   |
| IRF3 | ACSL4   |
| IRF3 | ACTN4   |
| IRF3 | ACTR1A  |
| IRF3 | ACTR3B  |

|      |          |
|------|----------|
| IRF3 | ADAMTS6  |
| IRF3 | ADAR     |
| IRF3 | ADD3     |
| IRF3 | ADIPOR1  |
| IRF3 | ADIPOR2  |
| IRF3 | ADPGK    |
| IRF3 | AFF3     |
| IRF3 | AFF4     |
| IRF3 | AG03     |
| IRF3 | AHCYL1   |
| IRF3 | AHDC1    |
| IRF3 | AHNAK    |
| IRF3 | AKAP13   |
| IRF3 | AKAP8    |
| IRF3 | AKAP8L   |
| IRF3 | AKR1A1   |
| IRF3 | AKT1S1   |
| IRF3 | ALAS1    |
| IRF3 | ALCAM    |
| IRF3 | ALDH3A2  |
| IRF3 | ALDOA    |
| IRF3 | ALKBH7   |
| IRF3 | ALKBH8   |
| IRF3 | AMD1     |
| IRF3 | ANAPC11  |
| IRF3 | ANAPC5   |
| IRF3 | ANGPTL6  |
| IRF3 | ANKRD16  |
| IRF3 | ANKRD28  |
| IRF3 | ANKS3    |
| IRF3 | ANXA6    |
| IRF3 | AP1B1    |
| IRF3 | AP2M1    |
| IRF3 | AP2S1    |
| IRF3 | APBB2    |
| IRF3 | APPL1    |
| IRF3 | AQP3     |
| IRF3 | ARF1     |
| IRF3 | ARFIP2   |
| IRF3 | ARHGAP22 |
| IRF3 | ARHGEF12 |
| IRF3 | ARID3A   |
| IRF3 | ARID4B   |
| IRF3 | ARL6IP5  |
| IRF3 | ARPC1B   |
| IRF3 | ARPC3    |
| IRF3 | ARRDC4   |
| IRF3 | ASAH1    |
| IRF3 | ASH1L    |
| IRF3 | ASL      |

|      |          |
|------|----------|
| IRF3 | ASNA1    |
| IRF3 | ATF4     |
| IRF3 | ATP6V0E1 |
| IRF3 | ATP6V1C1 |
| IRF3 | ATP6V1E1 |
| IRF3 | ATRX     |
| IRF3 | ATXN2L   |
| IRF3 | ATXN3    |
| IRF3 | AZIN1    |
| IRF3 | B3GNT2   |
| IRF3 | B4GALT3  |
| IRF3 | BAD      |
| IRF3 | BAK1     |
| IRF3 | BANP     |
| IRF3 | BAZ1A    |
| IRF3 | BAZ2A    |
| IRF3 | BAZ2B    |
| IRF3 | BBX      |
| IRF3 | BCL7B    |
| IRF3 | BICDL1   |
| IRF3 | BIK      |
| IRF3 | BLM      |
| IRF3 | BMPR2    |
| IRF3 | BRD4     |
| IRF3 | BRK1     |
| IRF3 | C11orf24 |
| IRF3 | C12orf57 |
| IRF3 | C15orf39 |
| IRF3 | C16orf74 |
| IRF3 | C16orf91 |
| IRF3 | C2orf42  |
| IRF3 | C9orf16  |
| IRF3 | CABIN1   |
| IRF3 | CALR     |
| IRF3 | CALU     |
| IRF3 | CANX     |
| IRF3 | CAPG     |
| IRF3 | CAPN1    |
| IRF3 | CAPNS1   |
| IRF3 | CAPZB    |
| IRF3 | CARS2    |
| IRF3 | CASC4    |
| IRF3 | CASP6    |
| IRF3 | CAT      |
| IRF3 | CBX7     |
| IRF3 | CCDC107  |
| IRF3 | CCDC167  |
| IRF3 | CCDC186  |
| IRF3 | CCDC189  |
| IRF3 | CCDC88C  |

|      |          |
|------|----------|
| IRF3 | CCM2     |
| IRF3 | CCNL1    |
| IRF3 | CCNL2    |
| IRF3 | CD19     |
| IRF3 | CD27     |
| IRF3 | CD37     |
| IRF3 | CD48     |
| IRF3 | CD52     |
| IRF3 | CD63     |
| IRF3 | CD74     |
| IRF3 | CDIPT    |
| IRF3 | CDK2AP2  |
| IRF3 | CDK5RAP3 |
| IRF3 | CEP152   |
| IRF3 | CEP57    |
| IRF3 | CERS5    |
| IRF3 | CGGBP1   |
| IRF3 | CHD8     |
| IRF3 | CHKA     |
| IRF3 | CHST12   |
| IRF3 | CIZ1     |
| IRF3 | CLIC1    |
| IRF3 | CLIP2    |
| IRF3 | CLK2     |
| IRF3 | CLK4     |
| IRF3 | CLN5     |
| IRF3 | CLPP     |
| IRF3 | CNNM3    |
| IRF3 | CNOT6L   |
| IRF3 | CNPY3    |
| IRF3 | COPS3    |
| IRF3 | C0Q5     |
| IRF3 | C0Q6     |
| IRF3 | C0TL1    |
| IRF3 | COX14    |
| IRF3 | COX5A    |
| IRF3 | COX7B    |
| IRF3 | COX8A    |
| IRF3 | CPNE1    |
| IRF3 | CPT1A    |
| IRF3 | CPTP     |
| IRF3 | CREG1    |
| IRF3 | CSK      |
| IRF3 | CSNK1A1  |
| IRF3 | CSNK1G2  |
| IRF3 | CSNK2A1  |
| IRF3 | CTCF     |
| IRF3 | CTSB     |
| IRF3 | CUEDC2   |
| IRF3 | CUTA     |

|      |          |
|------|----------|
| IRF3 | CWC25    |
| IRF3 | CXXC5    |
| IRF3 | CYB5B    |
| IRF3 | CYHR1    |
| IRF3 | CYP2R1   |
| IRF3 | DAPK3    |
| IRF3 | DARS     |
| IRF3 | DAXX     |
| IRF3 | DAZAP2   |
| IRF3 | DBI      |
| IRF3 | DCAF11   |
| IRF3 | DCAF15   |
| IRF3 | DCXR     |
| IRF3 | DDA1     |
| IRF3 | DDOST    |
| IRF3 | DDT      |
| IRF3 | DDX19B   |
| IRF3 | DEF6     |
| IRF3 | DENND1C  |
| IRF3 | DENND3   |
| IRF3 | DENND6A  |
| IRF3 | DENND6B  |
| IRF3 | DERL2    |
| IRF3 | DERL3    |
| IRF3 | DHRS4L2  |
| IRF3 | DLD      |
| IRF3 | DMTF1    |
| IRF3 | DMXL1    |
| IRF3 | DNAJB11  |
| IRF3 | DNAJC3   |
| IRF3 | DNAJC4   |
| IRF3 | DNASE1L1 |
| IRF3 | DNM2     |
| IRF3 | DPAGT1   |
| IRF3 | DPY30    |
| IRF3 | DUSP1    |
| IRF3 | EAPP     |
| IRF3 | EBP      |
| IRF3 | ECH1     |
| IRF3 | ECI1     |
| IRF3 | EEF1A1   |
| IRF3 | EEF2     |
| IRF3 | EFNA4    |
| IRF3 | EGR1     |
| IRF3 | EIF2AK3  |
| IRF3 | EIF2B3   |
| IRF3 | EIF5B    |
| IRF3 | ELL      |
| IRF3 | ELL2     |
| IRF3 | ELOF1    |

|      |            |
|------|------------|
| IRF3 | ELP4       |
| IRF3 | EMB        |
| IRF3 | EMC4       |
| IRF3 | ENOX2      |
| IRF3 | ENSA       |
| IRF3 | ENTPD7     |
| IRF3 | ERCC1      |
| IRF3 | ERF        |
| IRF3 | ERGIC3     |
| IRF3 | ESC01      |
| IRF3 | ESR2       |
| IRF3 | EXOSC1     |
| IRF3 | FAAP20     |
| IRF3 | FAF1       |
| IRF3 | FAF2       |
| IRF3 | FAM117A    |
| IRF3 | FAM133B    |
| IRF3 | FAM13B     |
| IRF3 | FAM162A    |
| IRF3 | FAM192A    |
| IRF3 | FAM217B    |
| IRF3 | FANCG      |
| IRF3 | FASN       |
| IRF3 | FBXL12     |
| IRF3 | FBX025     |
| IRF3 | FBXW4      |
| IRF3 | FCGRT      |
| IRF3 | FDFT1      |
| IRF3 | FDPS       |
| IRF3 | FKBP15     |
| IRF3 | FKBP8      |
| IRF3 | FKBPL      |
| IRF3 | FLI1       |
| IRF3 | FLNA       |
| IRF3 | FLYWCH1    |
| IRF3 | FNDC3A     |
| IRF3 | FOS        |
| IRF3 | FOXN3      |
| IRF3 | FRYL       |
| IRF3 | FXD5       |
| IRF3 | GABARAPL2  |
| IRF3 | GADD45GIP1 |
| IRF3 | GALM       |
| IRF3 | GATAD2B    |
| IRF3 | GBF1       |
| IRF3 | GCAT       |
| IRF3 | GEMIN7     |
| IRF3 | GFOD1      |
| IRF3 | GGCX       |
| IRF3 | GIGYF2     |

|      |           |
|------|-----------|
| IRF3 | GIPC1     |
| IRF3 | GLG1      |
| IRF3 | GL01      |
| IRF3 | GLRX5     |
| IRF3 | GLS       |
| IRF3 | GLT8D1    |
| IRF3 | GLTP      |
| IRF3 | GMEB1     |
| IRF3 | GNAI2     |
| IRF3 | GNAS      |
| IRF3 | GNB2      |
| IRF3 | GOLGA7    |
| IRF3 | GOLGB1    |
| IRF3 | GOLPH3L   |
| IRF3 | GOLT1B    |
| IRF3 | GPBP1     |
| IRF3 | GPCPD1    |
| IRF3 | GPR108    |
| IRF3 | GPR89B    |
| IRF3 | GPX4      |
| IRF3 | GRK6      |
| IRF3 | GRN       |
| IRF3 | GSDMD     |
| IRF3 | GSPT1     |
| IRF3 | GTF2B     |
| IRF3 | GTF2I     |
| IRF3 | GTPBP1    |
| IRF3 | GYS1      |
| IRF3 | GZF1      |
| IRF3 | HADHA     |
| IRF3 | HARS      |
| IRF3 | HDAC5     |
| IRF3 | HERC5     |
| IRF3 | HERPUD1   |
| IRF3 | HEXB      |
| IRF3 | HIP1R     |
| IRF3 | HIST2H2AC |
| IRF3 | HLA-DPA1  |
| IRF3 | HLA-DPB1  |
| IRF3 | HLA-DQB1  |
| IRF3 | HLA-DRA   |
| IRF3 | HLA-DRB5  |
| IRF3 | HLA-E     |
| IRF3 | HM13      |
| IRF3 | HMG20B    |
| IRF3 | HMGCS1    |
| IRF3 | HMOX2     |
| IRF3 | HNRNPL    |
| IRF3 | HNRNPUL2  |
| IRF3 | HOMEZ     |



|      |           |
|------|-----------|
| IRF3 | H00K2     |
| IRF3 | H0XB2     |
| IRF3 | HPCAL1    |
| IRF3 | HSCB      |
| IRF3 | HSD17B12  |
| IRF3 | HSD17B7   |
| IRF3 | HSP90B1   |
| IRF3 | HSPA5     |
| IRF3 | HYI       |
| IRF3 | ICAM3     |
| IRF3 | ID3       |
| IRF3 | IDH1      |
| IRF3 | IDH2      |
| IRF3 | IDH3G     |
| IRF3 | IFF01     |
| IRF3 | IFNG-AS1  |
| IRF3 | IKZF3     |
| IRF3 | IL2RG     |
| IRF3 | IMMT      |
| IRF3 | INSIG1    |
| IRF3 | IRF1      |
| IRF3 | IRF2      |
| IRF3 | ISCA2     |
| IRF3 | ISL2      |
| IRF3 | ISOC2     |
| IRF3 | ITFG2     |
| IRF3 | ITGA1     |
| IRF3 | ITGAL     |
| IRF3 | ITGB7     |
| IRF3 | ITM2B     |
| IRF3 | ITPR2     |
| IRF3 | ITSN1     |
| IRF3 | JAGN1     |
| IRF3 | JAK1      |
| IRF3 | JUND      |
| IRF3 | KANSL1    |
| IRF3 | KCNAB2    |
| IRF3 | KCNK12    |
| IRF3 | KDELRL1   |
| IRF3 | KDM2A     |
| IRF3 | KDM4B     |
| IRF3 | KIAA0355  |
| IRF3 | KIAA1143  |
| IRF3 | KIAA1191  |
| IRF3 | KIAA2013  |
| IRF3 | KIF13B    |
| IRF3 | KLF13     |
| IRF3 | KMT2E-AS1 |
| IRF3 | KXD1      |
| IRF3 | KYAT3     |

|      |           |
|------|-----------|
| IRF3 | L1CAM     |
| IRF3 | L2HGDH    |
| IRF3 | L3MBTL2   |
| IRF3 | LAGE3     |
| IRF3 | LAMTOR1   |
| IRF3 | LANCL1    |
| IRF3 | LARP1B    |
| IRF3 | LAT2      |
| IRF3 | LDLRAD4   |
| IRF3 | LEF1      |
| IRF3 | LENG1     |
| IRF3 | LINC01485 |
| IRF3 | LMAN2     |
| IRF3 | LM04      |
| IRF3 | LNX2      |
| IRF3 | LPCAT4    |
| IRF3 | LPIN1     |
| IRF3 | LPXN      |
| IRF3 | LRCH4     |
| IRF3 | LRMP      |
| IRF3 | LRP10     |
| IRF3 | LRP8      |
| IRF3 | LRRC37B   |
| IRF3 | LSM1      |
| IRF3 | LSM14B    |
| IRF3 | LSS       |
| IRF3 | LTBP3     |
| IRF3 | M6PR      |
| IRF3 | MAF1      |
| IRF3 | MAGED2    |
| IRF3 | MAGT1     |
| IRF3 | MANF      |
| IRF3 | MAP2K2    |
| IRF3 | MAP2K3    |
| IRF3 | MAP3K11   |
| IRF3 | MAP4K3    |
| IRF3 | MAP7D1    |
| IRF3 | MAPK8IP3  |
| IRF3 | MAPRE1    |
| IRF3 | MARK3     |
| IRF3 | MAT2B     |
| IRF3 | MAZ       |
| IRF3 | MBD2      |
| IRF3 | MCAT      |
| IRF3 | MCCC1     |
| IRF3 | MECP2     |
| IRF3 | MED10     |
| IRF3 | MEN1      |
| IRF3 | METTTL17  |
| IRF3 | METTTL2A  |

|      |          |
|------|----------|
| IRF3 | MFF      |
| IRF3 | MGMT     |
| IRF3 | MIEF1    |
| IRF3 | MIIP     |
| IRF3 | MIR22HG  |
| IRF3 | MKNK2    |
| IRF3 | MLEC     |
| IRF3 | MLF2     |
| IRF3 | MLYCD    |
| IRF3 | MORF4L1  |
| IRF3 | MOSPD3   |
| IRF3 | MPC1     |
| IRF3 | MPHOSPH8 |
| IRF3 | MPRIP    |
| IRF3 | MPV17L2  |
| IRF3 | MRFAP1   |
| IRF3 | MRI1     |
| IRF3 | MRM3     |
| IRF3 | MRPL23   |
| IRF3 | MRPL41   |
| IRF3 | MRPL52   |
| IRF3 | MRPS36   |
| IRF3 | MSANTD4  |
| IRF3 | MSL3     |
| IRF3 | MSM01    |
| IRF3 | MTERF2   |
| IRF3 | MTHFD1   |
| IRF3 | MTIF3    |
| IRF3 | MTMR4    |
| IRF3 | MTR      |
| IRF3 | MUM1     |
| IRF3 | MVD      |
| IRF3 | MVP      |
| IRF3 | MYB      |
| IRF3 | MYL6     |
| IRF3 | MYO19    |
| IRF3 | MYP0P    |
| IRF3 | MZB1     |
| IRF3 | NAB2     |
| IRF3 | NARF     |
| IRF3 | NCAPH    |
| IRF3 | NCKAP1L  |
| IRF3 | NCOR1    |
| IRF3 | NCR3     |
| IRF3 | NDEL1    |
| IRF3 | NDUFA11  |
| IRF3 | NDUFA13  |
| IRF3 | NDUFB11  |
| IRF3 | NDUFB6   |
| IRF3 | NDUFC2   |

|      |        |
|------|--------|
| IRF3 | NEAT1  |
| IRF3 | NEK8   |
| IRF3 | NET1   |
| IRF3 | NEU1   |
| IRF3 | NINJ1  |
| IRF3 | NKX6-3 |
| IRF3 | NLRP4  |
| IRF3 | NME4   |
| IRF3 | NME7   |
| IRF3 | NONO   |
| IRF3 | NPC2   |
| IRF3 | NPEPPS |
| IRF3 | NR2C2  |
| IRF3 | NR3C1  |
| IRF3 | NRDC   |
| IRF3 | NSDHL  |
| IRF3 | NSFL1C |
| IRF3 | NSUN4  |
| IRF3 | NT5DC1 |
| IRF3 | NT5DC2 |
| IRF3 | NTAN1  |
| IRF3 | NUAK2  |
| IRF3 | NUBPL  |
| IRF3 | NUDT9  |
| IRF3 | NUMB   |
| IRF3 | NUP107 |
| IRF3 | OAZ1   |
| IRF3 | OGG1   |
| IRF3 | ORC2   |
| IRF3 | ORMDL2 |
| IRF3 | OS9    |
| IRF3 | OSBP   |
| IRF3 | OSTF1  |
| IRF3 | OTUD5  |
| IRF3 | P4HA1  |
| IRF3 | P4HB   |
| IRF3 | PABPC4 |
| IRF3 | PABPN1 |
| IRF3 | PAF1   |
| IRF3 | PAK2   |
| IRF3 | PANK2  |
| IRF3 | PCBP1  |
| IRF3 | PCF11  |
| IRF3 | PDE4B  |
| IRF3 | PDE6D  |
| IRF3 | PDHA1  |
| IRF3 | PDHX   |
| IRF3 | PDIA3  |
| IRF3 | PDIA6  |
| IRF3 | PEBP1  |

|      |            |
|------|------------|
| IRF3 | PET100     |
| IRF3 | PFDN1      |
| IRF3 | PGAP2      |
| IRF3 | PGK1       |
| IRF3 | PGM1       |
| IRF3 | PGM3       |
| IRF3 | PGP        |
| IRF3 | PGRMC2     |
| IRF3 | PHC3       |
| IRF3 | PHKG2      |
| IRF3 | PHPT1      |
| IRF3 | PIAS3      |
| IRF3 | PIGX       |
| IRF3 | PIK3CD-AS2 |
| IRF3 | PIK3CG     |
| IRF3 | PIK3R4     |
| IRF3 | PIN4       |
| IRF3 | PITRM1     |
| IRF3 | PJA2       |
| IRF3 | PNKD       |
| IRF3 | PNOC       |
| IRF3 | PNP        |
| IRF3 | PNP0       |
| IRF3 | POLG       |
| IRF3 | POLR2A     |
| IRF3 | POLR3E     |
| IRF3 | POLR3H     |
| IRF3 | POLR3K     |
| IRF3 | POP5       |
| IRF3 | POP7       |
| IRF3 | PPIB       |
| IRF3 | PPIG       |
| IRF3 | PPM1G      |
| IRF3 | PPM1M      |
| IRF3 | PPP1R16B   |
| IRF3 | PPP1R7     |
| IRF3 | PPP2R5B    |
| IRF3 | PPP3CC     |
| IRF3 | PPP6C      |
| IRF3 | PPP6R3     |
| IRF3 | PQBP1      |
| IRF3 | PRCP       |
| IRF3 | PRDM2      |
| IRF3 | PRKAR2A    |
| IRF3 | PRKCSH     |
| IRF3 | PRKD2      |
| IRF3 | PRPSAP2    |
| IRF3 | PRR13      |
| IRF3 | PRR5       |
| IRF3 | PRRC1      |

|      |            |
|------|------------|
| IRF3 | PSMD10     |
| IRF3 | PSMD9      |
| IRF3 | PTPN1      |
| IRF3 | PTPN6      |
| IRF3 | PURB       |
| IRF3 | QPCT       |
| IRF3 | R3HDM2     |
| IRF3 | RAB11B-AS1 |
| IRF3 | RAB5C      |
| IRF3 | RAB7A      |
| IRF3 | RAB8A      |
| IRF3 | RAB9A      |
| IRF3 | RABAC1     |
| IRF3 | RABL3      |
| IRF3 | RAC1       |
| IRF3 | RAD9A      |
| IRF3 | RAF1       |
| IRF3 | RALGPS1    |
| IRF3 | RALGPS2    |
| IRF3 | RALY       |
| IRF3 | RANGRF     |
| IRF3 | RAP1A      |
| IRF3 | RASA4      |
| IRF3 | RASSF5     |
| IRF3 | RB1CC1     |
| IRF3 | RBM12      |
| IRF3 | RBM39      |
| IRF3 | RBM42      |
| IRF3 | RBM4B      |
| IRF3 | RCN2       |
| IRF3 | REEP5      |
| IRF3 | RFWD3      |
| IRF3 | RHN01      |
| IRF3 | RIDA       |
| IRF3 | RILPL2     |
| IRF3 | RLN2       |
| IRF3 | RNF114     |
| IRF3 | RNF14      |
| IRF3 | RNF181     |
| IRF3 | RNF20      |
| IRF3 | ROGDI      |
| IRF3 | RPL13      |
| IRF3 | RPL13A     |
| IRF3 | RPL17      |
| IRF3 | RPL18A     |
| IRF3 | RPL22      |
| IRF3 | RPL27      |
| IRF3 | RPL29      |
| IRF3 | RPL38      |
| IRF3 | RPLP2      |

|      |          |
|------|----------|
| IRF3 | RPN2     |
| IRF3 | RPS10    |
| IRF3 | RPS11    |
| IRF3 | RPS16    |
| IRF3 | RPS19    |
| IRF3 | RPS21    |
| IRF3 | RPS27    |
| IRF3 | RPS7     |
| IRF3 | RPS8     |
| IRF3 | RSBN1L   |
| IRF3 | RTF1     |
| IRF3 | RTN4     |
| IRF3 | RUFY1    |
| IRF3 | S1PR4    |
| IRF3 | SACM1L   |
| IRF3 | SAMD4B   |
| IRF3 | SASH3    |
| IRF3 | SAT2     |
| IRF3 | SC5D     |
| IRF3 | SCAMP2   |
| IRF3 | SCAMP4   |
| IRF3 | SCAP     |
| IRF3 | SCARB2   |
| IRF3 | SDCCAG8  |
| IRF3 | SDF2L1   |
| IRF3 | SEC11A   |
| IRF3 | SEC23A   |
| IRF3 | SEC23B   |
| IRF3 | SEC31A   |
| IRF3 | SEPT1    |
| IRF3 | SEPT6    |
| IRF3 | SEPT7    |
| IRF3 | SEPT9    |
| IRF3 | SERTAD1  |
| IRF3 | SETD3    |
| IRF3 | SF3B4    |
| IRF3 | SGK1     |
| IRF3 | SGSM3    |
| IRF3 | SH3BGRL3 |
| IRF3 | SHKBP1   |
| IRF3 | SIGMAR1  |
| IRF3 | SIT1     |
| IRF3 | SKAP2    |
| IRF3 | SLC25A38 |
| IRF3 | SLC25A39 |
| IRF3 | SLC26A6  |
| IRF3 | SLC38A10 |
| IRF3 | SLC41A1  |
| IRF3 | SLC43A2  |
| IRF3 | SLC7A6   |

|      |          |
|------|----------|
| IRF3 | SLC7A7   |
| IRF3 | SLC9A3R1 |
| IRF3 | SMARCC2  |
| IRF3 | SMCHD1   |
| IRF3 | SMDT1    |
| IRF3 | SMG1     |
| IRF3 | SMIM19   |
| IRF3 | SND1     |
| IRF3 | SNRNP25  |
| IRF3 | SNRNP40  |
| IRF3 | SNRPN    |
| IRF3 | SNX25    |
| IRF3 | SNX3     |
| IRF3 | SNX4     |
| IRF3 | SNX6     |
| IRF3 | SOX4     |
| IRF3 | SP100    |
| IRF3 | SPATS2   |
| IRF3 | SPCS2    |
| IRF3 | SPCS3    |
| IRF3 | SPG21    |
| IRF3 | SPG7     |
| IRF3 | SPINT2   |
| IRF3 | SPSB3    |
| IRF3 | SPTLC2   |
| IRF3 | SQLE     |
| IRF3 | SQSTM1   |
| IRF3 | SRM      |
| IRF3 | SRP68    |
| IRF3 | SRRM2    |
| IRF3 | SRSF4    |
| IRF3 | SRSF5    |
| IRF3 | SS18L2   |
| IRF3 | SSPN     |
| IRF3 | SSR1     |
| IRF3 | SSR2     |
| IRF3 | SSU72    |
| IRF3 | STAMBPL1 |
| IRF3 | STARD7   |
| IRF3 | STEAP1B  |
| IRF3 | STIM1    |
| IRF3 | STK38    |
| IRF3 | STT3A    |
| IRF3 | STX5     |
| IRF3 | SUB1     |
| IRF3 | SUCLG2   |
| IRF3 | SUDS3    |
| IRF3 | SULF2    |
| IRF3 | SUMF2    |
| IRF3 | SUM02    |



|      |           |
|------|-----------|
| IRF3 | SUZ12     |
| IRF3 | SYNE1     |
| IRF3 | SYNP0     |
| IRF3 | SYNRG     |
| IRF3 | SZRD1     |
| IRF3 | TAF15     |
| IRF3 | TAF7      |
| IRF3 | TANG02    |
| IRF3 | TBC1D22A  |
| IRF3 | TBC1D23   |
| IRF3 | TBCCD1    |
| IRF3 | TBL2      |
| IRF3 | TCF4      |
| IRF3 | TDRKH     |
| IRF3 | TECR      |
| IRF3 | TERF1     |
| IRF3 | TESK1     |
| IRF3 | THAP7     |
| IRF3 | THEMIS2   |
| IRF3 | THG1L     |
| IRF3 | THTPA     |
| IRF3 | TIA1      |
| IRF3 | TIMM17B   |
| IRF3 | TIMP1     |
| IRF3 | TINF2     |
| IRF3 | TKT       |
| IRF3 | TLE1      |
| IRF3 | TM9SF2    |
| IRF3 | TMBIM6    |
| IRF3 | TMEM160   |
| IRF3 | TMEM165   |
| IRF3 | TMEM189   |
| IRF3 | TMEM19    |
| IRF3 | TMEM219   |
| IRF3 | TMEM256   |
| IRF3 | TMEM30A   |
| IRF3 | TMEM33    |
| IRF3 | TMEM39B   |
| IRF3 | TMEM41B   |
| IRF3 | TMEM50B   |
| IRF3 | TMEM97    |
| IRF3 | TMUB2     |
| IRF3 | TNFRSF13C |
| IRF3 | TOMM40L   |
| IRF3 | TP53INP1  |
| IRF3 | TPM3      |
| IRF3 | TPP2      |
| IRF3 | TPST2     |
| IRF3 | TRAF2     |
| IRF3 | TRAF7     |

|      |          |
|------|----------|
| IRF3 | TRAM2    |
| IRF3 | TRAPPC3  |
| IRF3 | TRAPPC6A |
| IRF3 | TRIM66   |
| IRF3 | TRIOBP   |
| IRF3 | TRIT1    |
| IRF3 | TRMT10B  |
| IRF3 | TRPM4    |
| IRF3 | TRUB2    |
| IRF3 | TSC22D2  |
| IRF3 | TSC22D4  |
| IRF3 | TSPAN31  |
| IRF3 | TSPAN33  |
| IRF3 | TTC17    |
| IRF3 | TTC9C    |
| IRF3 | TWF2     |
| IRF3 | TXLNA    |
| IRF3 | TYSND1   |
| IRF3 | UBA3     |
| IRF3 | UBE2D2   |
| IRF3 | UBE2V1   |
| IRF3 | UBR5     |
| IRF3 | UBTF     |
| IRF3 | UBXN1    |
| IRF3 | UBXN8    |
| IRF3 | UFC1     |
| IRF3 | UGDH     |
| IRF3 | UNC45A   |
| IRF3 | UQCC2    |
| IRF3 | UQCRC2   |
| IRF3 | URI1     |
| IRF3 | US01     |
| IRF3 | USP34    |
| IRF3 | VAMP2    |
| IRF3 | VCP      |
| IRF3 | VPS11    |
| IRF3 | VPS33B   |
| IRF3 | VRK1     |
| IRF3 | WDR45    |
| IRF3 | WDR92    |
| IRF3 | XAB2     |
| IRF3 | YIF1B    |
| IRF3 | YKT6     |
| IRF3 | YPEL3    |
| IRF3 | YWHAB    |
| IRF3 | ZBED5    |
| IRF3 | ZBTB32   |
| IRF3 | ZBTB7A   |
| IRF3 | ZC2HC1A  |
| IRF3 | ZC3H14   |

|      |            |
|------|------------|
| IRF3 | ZCCHC17    |
| IRF3 | ZDHC12     |
| IRF3 | ZDHC4      |
| IRF3 | ZFAND1     |
| IRF3 | ZFAND6     |
| IRF3 | ZFP36L2    |
| IRF3 | ZMAT3      |
| IRF3 | ZMAT5      |
| IRF3 | ZMYM3      |
| IRF3 | ZMYND8     |
| IRF3 | ZNF124     |
| IRF3 | ZNF277     |
| IRF3 | ZNF292     |
| IRF3 | ZNF444     |
| IRF3 | ZNF445     |
| IRF3 | ZNF473     |
| IRF3 | ZNF493     |
| IRF3 | ZNF513     |
| IRF3 | ZNF518A    |
| IRF3 | ZNF580     |
| IRF3 | ZNF584     |
| IRF3 | ZNF609     |
| IRF3 | ZNF638     |
| IRF3 | ZNF672     |
| IRF3 | ZNF736     |
| IRF3 | ZNF791     |
| IRF3 | ZNF821     |
| IRF4 | ABHD6      |
| IRF4 | APOL1      |
| IRF4 | APOL6      |
| IRF4 | ARL5B      |
| IRF4 | ASCL2      |
| IRF4 | ATF5       |
| IRF4 | ATP1B1     |
| IRF4 | B2M        |
| IRF4 | BCAS3      |
| IRF4 | BTN3A2     |
| IRF4 | CHAC1      |
| IRF4 | CMIP       |
| IRF4 | CSGALNACT2 |
| IRF4 | CYP4V2     |
| IRF4 | DEXI       |
| IRF4 | ERN1       |
| IRF4 | FBX016     |
| IRF4 | FBX038     |
| IRF4 | FBXW7      |
| IRF4 | FGD2       |
| IRF4 | FNDC3A     |
| IRF4 | FUCA2      |
| IRF4 | GPRIN3     |

|      |         |
|------|---------|
| IRF4 | HAX1    |
| IRF4 | HERC5   |
| IRF4 | HERPUD1 |
| IRF4 | HLA-B   |
| IRF4 | IFIH1   |
| IRF4 | INSIG1  |
| IRF4 | IRF4    |
| IRF4 | ISG15   |
| IRF4 | ISOC2   |
| IRF4 | ITCH    |
| IRF4 | MAN1A2  |
| IRF4 | MANF    |
| IRF4 | MIA2    |
| IRF4 | OAS2    |
| IRF4 | P4HB    |
| IRF4 | PICALM  |
| IRF4 | PLEKHM1 |
| IRF4 | PRDM1   |
| IRF4 | RARRES3 |
| IRF4 | RUNX2   |
| IRF4 | SAP30L  |
| IRF4 | SCARB2  |
| IRF4 | SEC24D  |
| IRF4 | SGK3    |
| IRF4 | SLC31A2 |
| IRF4 | SLC33A1 |
| IRF4 | SRGN    |
| IRF4 | SRM     |
| IRF4 | ST7     |
| IRF4 | SUB1    |
| IRF4 | TIRAP   |
| IRF4 | TUT1    |
| IRF4 | TXNDC15 |
| IRF4 | UBN2    |
| IRF4 | US01    |
| IRF4 | USP18   |
| IRF4 | VDR     |
| IRF4 | WARS    |
| IRF4 | ZBP1    |
| IRF4 | ZMYM6   |
| IRF4 | ZNF181  |
| IRF4 | ZNF3    |
| IRF5 | AHDC1   |
| IRF5 | ARHGAP5 |
| IRF5 | CCR7    |
| IRF5 | CD24    |
| IRF5 | FGR     |
| IRF5 | IRF5    |
| IRF5 | MAP2K5  |
| IRF5 | MPEG1   |

|      |          |
|------|----------|
| IRF5 | NFKBIE   |
| IRF5 | PARP9    |
| IRF5 | PDCD4    |
| IRF5 | PLAGL1   |
| IRF5 | PPFIBP2  |
| IRF5 | RARA     |
| IRF5 | RRP12    |
| IRF5 | SORBS3   |
| IRF5 | TGIF1    |
| IRF5 | TNIP1    |
| IRF7 | ABHD2    |
| IRF7 | ACAA1    |
| IRF7 | ACBD4    |
| IRF7 | ACKR4    |
| IRF7 | ACSS1    |
| IRF7 | ADAM15   |
| IRF7 | ADAR     |
| IRF7 | ADD1     |
| IRF7 | ADI1     |
| IRF7 | ADIPOR1  |
| IRF7 | ADIPOR2  |
| IRF7 | ADPGK    |
| IRF7 | AKAP8L   |
| IRF7 | AKAP9    |
| IRF7 | AKR1A1   |
| IRF7 | ALCAM    |
| IRF7 | ALDH9A1  |
| IRF7 | ALDOC    |
| IRF7 | ANG      |
| IRF7 | ANKIB1   |
| IRF7 | ANKRD12  |
| IRF7 | ANKRD28  |
| IRF7 | ANKRD37  |
| IRF7 | ANXA2R   |
| IRF7 | ANXA6    |
| IRF7 | APBA3    |
| IRF7 | APOBEC3G |
| IRF7 | APOD     |
| IRF7 | APOL2    |
| IRF7 | APOL3    |
| IRF7 | APOL6    |
| IRF7 | AREG     |
| IRF7 | ARF3     |
| IRF7 | ARF4     |
| IRF7 | ARHGAP15 |
| IRF7 | ARHGDIB  |
| IRF7 | ARID1B   |
| IRF7 | ARL4C    |
| IRF7 | ARMC7    |
| IRF7 | ARMCX3   |

|      |           |
|------|-----------|
| IRF7 | ARMCX6    |
| IRF7 | ARSA      |
| IRF7 | ASAH1     |
| IRF7 | ASH1L     |
| IRF7 | ATF6      |
| IRF7 | ATG13     |
| IRF7 | ATP10D    |
| IRF7 | ATP13A1   |
| IRF7 | ATP6AP1   |
| IRF7 | ATP6AP2   |
| IRF7 | ATP6V0E1  |
| IRF7 | ATP6V0E2  |
| IRF7 | ATP8B2    |
| IRF7 | AZI2      |
| IRF7 | B2M       |
| IRF7 | B3GNT2    |
| IRF7 | B4GALT3   |
| IRF7 | BAK1      |
| IRF7 | BCAP31    |
| IRF7 | BCAR3     |
| IRF7 | BCL2L1    |
| IRF7 | BET1      |
| IRF7 | BHLHE41   |
| IRF7 | BISPR     |
| IRF7 | BIVM      |
| IRF7 | BLNK      |
| IRF7 | BORCS5    |
| IRF7 | BRD1      |
| IRF7 | BRX       |
| IRF7 | BTBD1     |
| IRF7 | BTG1      |
| IRF7 | BTN1A1    |
| IRF7 | BTN3A2    |
| IRF7 | C11orf68  |
| IRF7 | C11orf71  |
| IRF7 | C12orf10  |
| IRF7 | C14orf93  |
| IRF7 | C15orf39  |
| IRF7 | C17orf75  |
| IRF7 | C18orf25  |
| IRF7 | C18orf32  |
| IRF7 | C19orf66  |
| IRF7 | C1GALT1C1 |
| IRF7 | C1orf43   |
| IRF7 | C2orf74   |
| IRF7 | C3orf52   |
| IRF7 | C6orf89   |
| IRF7 | CALU      |
| IRF7 | CAMK4     |
| IRF7 | CAP1      |

|      |         |
|------|---------|
| IRF7 | CASP4   |
| IRF7 | CASP8   |
| IRF7 | CBLB    |
| IRF7 | CBR1    |
| IRF7 | CCDC107 |
| IRF7 | CCDC186 |
| IRF7 | CCDC69  |
| IRF7 | CCDC88A |
| IRF7 | CCDC88B |
| IRF7 | CCL25   |
| IRF7 | CCL5    |
| IRF7 | CCM2    |
| IRF7 | CCNL1   |
| IRF7 | CCPG1   |
| IRF7 | CCR10   |
| IRF7 | CD164   |
| IRF7 | CD247   |
| IRF7 | CD37    |
| IRF7 | CD38    |
| IRF7 | CD47    |
| IRF7 | CD53    |
| IRF7 | CD59    |
| IRF7 | CD63    |
| IRF7 | CD68    |
| IRF7 | CD74    |
| IRF7 | CD79A   |
| IRF7 | CDIP1   |
| IRF7 | CDIPT   |
| IRF7 | CDK12   |
| IRF7 | CDK14   |
| IRF7 | CDR2    |
| IRF7 | CDS2    |
| IRF7 | CEP97   |
| IRF7 | CERCAM  |
| IRF7 | CGRRF1  |
| IRF7 | CHAC1   |
| IRF7 | CHI3L2  |
| IRF7 | CHMP5   |
| IRF7 | CHST12  |
| IRF7 | CHST15  |
| IRF7 | CHST2   |
| IRF7 | CHSY1   |
| IRF7 | CITED2  |
| IRF7 | CKAP4   |
| IRF7 | CLASP2  |
| IRF7 | CLCN4   |
| IRF7 | CLEC2B  |
| IRF7 | CLIC1   |
| IRF7 | CLK1    |
| IRF7 | CMPK2   |

|      |         |
|------|---------|
| IRF7 | CNPY2   |
| IRF7 | COG3    |
| IRF7 | COG8    |
| IRF7 | COMMD3  |
| IRF7 | COPA    |
| IRF7 | COPB1   |
| IRF7 | COPG1   |
| IRF7 | COPZ1   |
| IRF7 | COX5A   |
| IRF7 | CPEB4   |
| IRF7 | CPNE5   |
| IRF7 | CPXM1   |
| IRF7 | CREB3   |
| IRF7 | CREB3L2 |
| IRF7 | CREBZF  |
| IRF7 | CRELD2  |
| IRF7 | CRTC3   |
| IRF7 | CTHRC1  |
| IRF7 | CTNNA1  |
| IRF7 | CTSA    |
| IRF7 | CTSH    |
| IRF7 | CTSS    |
| IRF7 | CUTA    |
| IRF7 | CYBA    |
| IRF7 | CYSTEM1 |
| IRF7 | CYTH4   |
| IRF7 | CYTIP   |
| IRF7 | DAPL1   |
| IRF7 | DAPP1   |
| IRF7 | DCAKD   |
| IRF7 | DCLRE1C |
| IRF7 | DCP1A   |
| IRF7 | DCTN2   |
| IRF7 | DDAH2   |
| IRF7 | DDX58   |
| IRF7 | DEF6    |
| IRF7 | DENND1B |
| IRF7 | DENND6B |
| IRF7 | DERL1   |
| IRF7 | DESI1   |
| IRF7 | DGKD    |
| IRF7 | DHRS7   |
| IRF7 | DHRS9   |
| IRF7 | DMD     |
| IRF7 | DNAJB9  |
| IRF7 | DNAJC1  |
| IRF7 | DNAJC3  |
| IRF7 | DNASE2  |
| IRF7 | DOCK8   |
| IRF7 | DOK7    |



|      |           |
|------|-----------|
| IRF7 | DPM1      |
| IRF7 | DUSP14    |
| IRF7 | DYNLRB1   |
| IRF7 | DYNLT1    |
| IRF7 | EBI3      |
| IRF7 | EBP       |
| IRF7 | EEF1D     |
| IRF7 | EFHC1     |
| IRF7 | EHMT1     |
| IRF7 | EIF2AK2   |
| IRF7 | ELK3      |
| IRF7 | EMC3      |
| IRF7 | EMC7      |
| IRF7 | EMILIN2   |
| IRF7 | EML4      |
| IRF7 | EML6      |
| IRF7 | ENTPD1    |
| IRF7 | EPHA1-AS1 |
| IRF7 | EPSTI1    |
| IRF7 | ERAP1     |
| IRF7 | ERGIC2    |
| IRF7 | ERGIC3    |
| IRF7 | ERLEC1    |
| IRF7 | ER01A     |
| IRF7 | ER01B     |
| IRF7 | ERP29     |
| IRF7 | ERP44     |
| IRF7 | ESC01     |
| IRF7 | ETFBKMT   |
| IRF7 | ETV7      |
| IRF7 | EVI5      |
| IRF7 | FAM118A   |
| IRF7 | FAM174A   |
| IRF7 | FAM213B   |
| IRF7 | FAM78A    |
| IRF7 | FAM89B    |
| IRF7 | FANCF     |
| IRF7 | FBX011    |
| IRF7 | FBX016    |
| IRF7 | FBX06     |
| IRF7 | FBXW7     |
| IRF7 | FCRL5     |
| IRF7 | FGD2      |
| IRF7 | FICD      |
| IRF7 | FKBP14    |
| IRF7 | FKBP2     |
| IRF7 | FNDC3A    |
| IRF7 | FOS       |
| IRF7 | FOXJ3     |
| IRF7 | FOXN3     |

|      |           |
|------|-----------|
| IRF7 | FOX03     |
| IRF7 | FUT8      |
| IRF7 | FXR2      |
| IRF7 | GABARAP   |
| IRF7 | GALK2     |
| IRF7 | GBP4      |
| IRF7 | GDI2      |
| IRF7 | GLCCI1    |
| IRF7 | GLRX      |
| IRF7 | GLRX2     |
| IRF7 | GLS       |
| IRF7 | GMPR      |
| IRF7 | GOLGA3    |
| IRF7 | GOLIM4    |
| IRF7 | GORASP2   |
| IRF7 | GOSR2     |
| IRF7 | GPR146    |
| IRF7 | GPR155    |
| IRF7 | GPR160    |
| IRF7 | GPR65     |
| IRF7 | GPSM3     |
| IRF7 | GRAP2     |
| IRF7 | GRK6      |
| IRF7 | GRN       |
| IRF7 | GSDMD     |
| IRF7 | GSE1      |
| IRF7 | GUK1      |
| IRF7 | GYPE      |
| IRF7 | HELZ2     |
| IRF7 | HERC1     |
| IRF7 | HERC5     |
| IRF7 | HGS       |
| IRF7 | HIST1H1C  |
| IRF7 | HIST1H2BN |
| IRF7 | HIST1H4H  |
| IRF7 | HLA-A     |
| IRF7 | HLA-B     |
| IRF7 | HLA-DPA1  |
| IRF7 | HLA-DQA1  |
| IRF7 | HLA-DRA   |
| IRF7 | HLA-E     |
| IRF7 | HLA-F     |
| IRF7 | HM13      |
| IRF7 | HMGCS1    |
| IRF7 | HOXB2     |
| IRF7 | HSCB      |
| IRF7 | HSD17B12  |
| IRF7 | HSP90B1   |
| IRF7 | HSPA13    |
| IRF7 | HYI       |

|      |         |
|------|---------|
| IRF7 | ICAM2   |
| IRF7 | IDH2    |
| IRF7 | IFI16   |
| IRF7 | IFI27L2 |
| IRF7 | IFI35   |
| IRF7 | IFI44L  |
| IRF7 | IFI6    |
| IRF7 | IFIH1   |
| IRF7 | IFIT1   |
| IRF7 | IFIT2   |
| IRF7 | IFIT3   |
| IRF7 | IFNAR1  |
| IRF7 | IFNAR2  |
| IRF7 | IFRD1   |
| IRF7 | IGFLR1  |
| IRF7 | IGSF8   |
| IRF7 | IKBIP   |
| IRF7 | IKBKG   |
| IRF7 | IL12RB1 |
| IRF7 | IL16    |
| IRF7 | ING1    |
| IRF7 | INPP5B  |
| IRF7 | INPPL1  |
| IRF7 | INSIG2  |
| IRF7 | IQGAP2  |
| IRF7 | IRAK1   |
| IRF7 | IRF1    |
| IRF7 | IRF2    |
| IRF7 | IRF4    |
| IRF7 | IRF7    |
| IRF7 | IRF9    |
| IRF7 | ISG15   |
| IRF7 | ISG20   |
| IRF7 | ISOC2   |
| IRF7 | ITCH    |
| IRF7 | ITGB7   |
| IRF7 | ITM2B   |
| IRF7 | ITM2C   |
| IRF7 | JCHAIN  |
| IRF7 | JTB     |
| IRF7 | KAT6B   |
| IRF7 | KBTBD7  |
| IRF7 | KCNA3   |
| IRF7 | KCNK6   |
| IRF7 | KCNN3   |
| IRF7 | KCTD20  |
| IRF7 | KDELC2  |
| IRF7 | KDELR2  |
| IRF7 | KIZ     |
| IRF7 | KLF2    |

|      |           |
|------|-----------|
| IRF7 | KLF4      |
| IRF7 | KLHDC4    |
| IRF7 | KMT2E-AS1 |
| IRF7 | KMT5A     |
| IRF7 | KRT10     |
| IRF7 | LAP3      |
| IRF7 | LAPTM4A   |
| IRF7 | LAPTM5    |
| IRF7 | LARP1B    |
| IRF7 | LAX1      |
| IRF7 | LDB1      |
| IRF7 | LGALS3BP  |
| IRF7 | LGALS9    |
| IRF7 | LINC00649 |
| IRF7 | LINC00847 |
| IRF7 | LITAF     |
| IRF7 | LMAN2     |
| IRF7 | LM02      |
| IRF7 | LM04      |
| IRF7 | LPIN1     |
| IRF7 | LRBA      |
| IRF7 | LRP10     |
| IRF7 | LRRC2     |
| IRF7 | LSP1      |
| IRF7 | LY6E      |
| IRF7 | LZTFL1    |
| IRF7 | MAGED1    |
| IRF7 | MAGED2    |
| IRF7 | MAGT1     |
| IRF7 | MAN1A1    |
| IRF7 | MAN1A2    |
| IRF7 | MANEA     |
| IRF7 | MANF      |
| IRF7 | MAP3K11   |
| IRF7 | MAP3K13   |
| IRF7 | MAPKAPK2  |
| IRF7 | MARCH6    |
| IRF7 | MBD1      |
| IRF7 | MBD6      |
| IRF7 | MBNL2     |
| IRF7 | MBTPS1    |
| IRF7 | MCEE      |
| IRF7 | MCL1      |
| IRF7 | MCTP2     |
| IRF7 | MED8      |
| IRF7 | MEF2C     |
| IRF7 | MEF2D     |
| IRF7 | METTTL7A  |
| IRF7 | MFSD1     |
| IRF7 | MFSD12    |

|      |         |
|------|---------|
| IRF7 | MGAT1   |
| IRF7 | MGST2   |
| IRF7 | MIA3    |
| IRF7 | MIXL1   |
| IRF7 | MLEC    |
| IRF7 | MLKL    |
| IRF7 | MOB3C   |
| IRF7 | MORF4L2 |
| IRF7 | MPG     |
| IRF7 | MPND    |
| IRF7 | MPV17L2 |
| IRF7 | MRPL44  |
| IRF7 | MSL3    |
| IRF7 | MTDH    |
| IRF7 | MTIF3   |
| IRF7 | MT01    |
| IRF7 | MUL1    |
| IRF7 | MVB12A  |
| IRF7 | MVP     |
| IRF7 | MX1     |
| IRF7 | MX2     |
| IRF7 | MYCBP2  |
| IRF7 | MYL4    |
| IRF7 | MYO1G   |
| IRF7 | MZB1    |
| IRF7 | N4BP2L2 |
| IRF7 | NAGK    |
| IRF7 | NAPA    |
| IRF7 | NCF1    |
| IRF7 | NCK2    |
| IRF7 | NCKAP1L |
| IRF7 | NCLN    |
| IRF7 | NDUFAF1 |
| IRF7 | NDUFB4  |
| IRF7 | NEAT1   |
| IRF7 | NECAP2  |
| IRF7 | NEDD9   |
| IRF7 | NGRN    |
| IRF7 | NHLRC2  |
| IRF7 | NISCH   |
| IRF7 | NKTR    |
| IRF7 | NMI     |
| IRF7 | NOSIP   |
| IRF7 | NPC2    |
| IRF7 | NPL0C4  |
| IRF7 | NR2C1   |
| IRF7 | NR2C2   |
| IRF7 | NSMCE3  |
| IRF7 | NSUN6   |
| IRF7 | NT5C3A  |

|      |         |
|------|---------|
| IRF7 | NT5E    |
| IRF7 | NUCB2   |
| IRF7 | OAF     |
| IRF7 | OAS1    |
| IRF7 | OAS2    |
| IRF7 | OGFOD2  |
| IRF7 | OPA3    |
| IRF7 | ORMDL3  |
| IRF7 | OST4    |
| IRF7 | OTUD1   |
| IRF7 | OXA1L   |
| IRF7 | P2RX1   |
| IRF7 | P2RX4   |
| IRF7 | P4HA1   |
| IRF7 | P4HTM   |
| IRF7 | PAG1    |
| IRF7 | PAOX    |
| IRF7 | PARP12  |
| IRF7 | PARP4   |
| IRF7 | PARP9   |
| IRF7 | PARVG   |
| IRF7 | PCED1B  |
| IRF7 | PDE4DIP |
| IRF7 | PDIA5   |
| IRF7 | PDK1    |
| IRF7 | PDLIM1  |
| IRF7 | PDXK    |
| IRF7 | PHF11   |
| IRF7 | PIAS1   |
| IRF7 | PINK1   |
| IRF7 | PITPNM1 |
| IRF7 | PLD3    |
| IRF7 | PLD4    |
| IRF7 | PLSCR1  |
| IRF7 | PLTP    |
| IRF7 | PMEPA1  |
| IRF7 | PNISR   |
| IRF7 | PNOC    |
| IRF7 | PNPLA8  |
| IRF7 | PNPT1   |
| IRF7 | PNRC1   |
| IRF7 | POLR2A  |
| IRF7 | POLR3D  |
| IRF7 | POMC    |
| IRF7 | POU2F1  |
| IRF7 | PPM1K   |
| IRF7 | PPP1CA  |
| IRF7 | PPP3CC  |
| IRF7 | PPP6R1  |
| IRF7 | PRDX4   |

|      |           |
|------|-----------|
| IRF7 | PRKAR2B   |
| IRF7 | PRKCB     |
| IRF7 | PRKCSH    |
| IRF7 | PRKD2     |
| IRF7 | PRPSAP1   |
| IRF7 | PRRC1     |
| IRF7 | PSAP      |
| IRF7 | PSMB10    |
| IRF7 | PSMB8-AS1 |
| IRF7 | PSMB9     |
| IRF7 | PSME1     |
| IRF7 | PSME2     |
| IRF7 | PTPN4     |
| IRF7 | PTPN6     |
| IRF7 | PTPRA     |
| IRF7 | PTPRN2    |
| IRF7 | PURB      |
| IRF7 | PYCARD    |
| IRF7 | PYURF     |
| IRF7 | QKI       |
| IRF7 | QPCT      |
| IRF7 | RAB1A     |
| IRF7 | RAB5C     |
| IRF7 | RAB6A     |
| IRF7 | RABAC1    |
| IRF7 | RAC2      |
| IRF7 | RAD9A     |
| IRF7 | RALGPS2   |
| IRF7 | RALY      |
| IRF7 | RAP2B     |
| IRF7 | RASGRP2   |
| IRF7 | RBBP5     |
| IRF7 | RBCK1     |
| IRF7 | RBM18     |
| IRF7 | RCN1      |
| IRF7 | RCSD1     |
| IRF7 | RDM1      |
| IRF7 | REEP5     |
| IRF7 | RELA      |
| IRF7 | RGCC      |
| IRF7 | RGS1      |
| IRF7 | RNASE6    |
| IRF7 | RNASEK    |
| IRF7 | RNASET2   |
| IRF7 | RNF103    |
| IRF7 | RNF114    |
| IRF7 | RNF213    |
| IRF7 | RNH1      |
| IRF7 | RNPEPL1   |
| IRF7 | RPL10     |

|      |           |
|------|-----------|
| IRF7 | RPL41     |
| IRF7 | RPS11     |
| IRF7 | RPS27     |
| IRF7 | RPS6KA1   |
| IRF7 | RRAGC     |
| IRF7 | RRBP1     |
| IRF7 | RREB1     |
| IRF7 | RSAD2     |
| IRF7 | RSPRY1    |
| IRF7 | RTP4      |
| IRF7 | RUBCN     |
| IRF7 | RUNX1     |
| IRF7 | S1PR4     |
| IRF7 | SAMD9     |
| IRF7 | SAMD9L    |
| IRF7 | SAR1B     |
| IRF7 | SASH3     |
| IRF7 | SAT1      |
| IRF7 | SCAMP2    |
| IRF7 | SCAPER    |
| IRF7 | SCPEP1    |
| IRF7 | SCRN2     |
| IRF7 | SDC1      |
| IRF7 | SEC23B    |
| IRF7 | SEC24A    |
| IRF7 | SEC24D    |
| IRF7 | SEC31A    |
| IRF7 | SEC61A1   |
| IRF7 | SEC62     |
| IRF7 | SECISBP2L |
| IRF7 | SELL      |
| IRF7 | SELPLG    |
| IRF7 | SENP6     |
| IRF7 | SERP1     |
| IRF7 | SFT2D1    |
| IRF7 | SGK3      |
| IRF7 | SGSM3     |
| IRF7 | SH3BGR1   |
| IRF7 | SHISA5    |
| IRF7 | SIL1      |
| IRF7 | SKAP1     |
| IRF7 | SLAMF7    |
| IRF7 | SLC15A3   |
| IRF7 | SLC22A5   |
| IRF7 | SLC25A22  |
| IRF7 | SLC30A7   |
| IRF7 | SLC33A1   |
| IRF7 | SLC38A10  |
| IRF7 | SLC38A7   |
| IRF7 | SLC38A9   |



|      |          |
|------|----------|
| IRF7 | SLC39A11 |
| IRF7 | SLC39A13 |
| IRF7 | SLC39A8  |
| IRF7 | SLC44A1  |
| IRF7 | SLC05A1  |
| IRF7 | SMCHD1   |
| IRF7 | SMIM14   |
| IRF7 | SMURF1   |
| IRF7 | SMYD2    |
| IRF7 | SND1     |
| IRF7 | SND1-IT1 |
| IRF7 | SNX3     |
| IRF7 | S0CS3    |
| IRF7 | SOWAHD   |
| IRF7 | SP100    |
| IRF7 | SP110    |
| IRF7 | SP3      |
| IRF7 | SPAG9    |
| IRF7 | SPATS2   |
| IRF7 | SPC24    |
| IRF7 | SPCS3    |
| IRF7 | SPINT2   |
| IRF7 | SPOCK2   |
| IRF7 | SPOP     |
| IRF7 | SRBD1    |
| IRF7 | SRP54    |
| IRF7 | SRPK2    |
| IRF7 | SRPRB    |
| IRF7 | SRSF5    |
| IRF7 | SRSF8    |
| IRF7 | SSR3     |
| IRF7 | SSTR2    |
| IRF7 | SSU72    |
| IRF7 | ST20-AS1 |
| IRF7 | STAP1    |
| IRF7 | STARD5   |
| IRF7 | STAT1    |
| IRF7 | STAT2    |
| IRF7 | STAT3    |
| IRF7 | STK17B   |
| IRF7 | STOM     |
| IRF7 | STRN4    |
| IRF7 | STT3B    |
| IRF7 | STX12    |
| IRF7 | SUB1     |
| IRF7 | SUCLG2   |
| IRF7 | SUC0     |
| IRF7 | SUDS3    |
| IRF7 | SYTL1    |
| IRF7 | TAF5L    |

|      |           |
|------|-----------|
| IRF7 | TAP1      |
| IRF7 | TAP2      |
| IRF7 | TAPBP     |
| IRF7 | TAPBPL    |
| IRF7 | TAPT1     |
| IRF7 | TAX1BP1   |
| IRF7 | TBC1D10C  |
| IRF7 | TCEAL1    |
| IRF7 | TCF4      |
| IRF7 | TFG       |
| IRF7 | THEMIS2   |
| IRF7 | TICAM1    |
| IRF7 | TINF2     |
| IRF7 | TJP1      |
| IRF7 | TLN1      |
| IRF7 | TLR7      |
| IRF7 | TM9SF2    |
| IRF7 | TM9SF4    |
| IRF7 | TMBIM6    |
| IRF7 | TMC01     |
| IRF7 | TMED10    |
| IRF7 | TMED7     |
| IRF7 | TMEM134   |
| IRF7 | TMEM167A  |
| IRF7 | TMEM214   |
| IRF7 | TMEM219   |
| IRF7 | TMEM30A   |
| IRF7 | TMEM33    |
| IRF7 | TMEM50A   |
| IRF7 | TMEM50B   |
| IRF7 | TMEM59    |
| IRF7 | TMEM9     |
| IRF7 | TMEM99    |
| IRF7 | TMSB10    |
| IRF7 | TNFRSF14  |
| IRF7 | TNFRSF17  |
| IRF7 | TNFSF10   |
| IRF7 | TOR3A     |
| IRF7 | TP53INP1  |
| IRF7 | TPD52     |
| IRF7 | TPST2     |
| IRF7 | TRABD     |
| IRF7 | TRAM1     |
| IRF7 | TRAM2     |
| IRF7 | TRAM2-AS1 |
| IRF7 | TRIB1     |
| IRF7 | TRIM22    |
| IRF7 | TRIM36    |
| IRF7 | TRIM56    |
| IRF7 | TRIM73    |

|      |         |
|------|---------|
| IRF7 | TRMT10B |
| IRF7 | TSC22D1 |
| IRF7 | TSC22D3 |
| IRF7 | TSPAN13 |
| IRF7 | TSPAN31 |
| IRF7 | TSPAN5  |
| IRF7 | TSPYL2  |
| IRF7 | TVP23B  |
| IRF7 | TXNDC11 |
| IRF7 | TXNDC15 |
| IRF7 | UAP1    |
| IRF7 | UBASH3B |
| IRF7 | UBB     |
| IRF7 | UBC     |
| IRF7 | UBE2H   |
| IRF7 | UBE2L6  |
| IRF7 | UBL7    |
| IRF7 | UBTD2   |
| IRF7 | UBXN4   |
| IRF7 | UCP2    |
| IRF7 | UNC45A  |
| IRF7 | UNC93B1 |
| IRF7 | URO5    |
| IRF7 | US01    |
| IRF7 | USP18   |
| IRF7 | UTRN    |
| IRF7 | VAV1    |
| IRF7 | VPS37C  |
| IRF7 | VPS41   |
| IRF7 | WARS    |
| IRF7 | WDR45   |
| IRF7 | WDTC1   |
| IRF7 | WIPF1   |
| IRF7 | XAF1    |
| IRF7 | XBP1    |
| IRF7 | YIF1B   |
| IRF7 | YPEL5   |
| IRF7 | ZBP1    |
| IRF7 | ZBTB43  |
| IRF7 | ZBTB7B  |
| IRF7 | ZC3H7B  |
| IRF7 | ZC3HAV1 |
| IRF7 | ZDHC5   |
| IRF7 | ZFAND1  |
| IRF7 | ZFAND2B |
| IRF7 | ZFP36   |
| IRF7 | ZFP36L1 |
| IRF7 | ZFP36L2 |
| IRF7 | ZHX3    |
| IRF7 | ZNF133  |

|      |            |
|------|------------|
| IRF7 | ZNF24      |
| IRF7 | ZNF3       |
| IRF7 | ZNF654     |
| IRF7 | ZNF687     |
| IRF7 | ZNF780A    |
| IRF7 | ZNF821     |
| IRF7 | ZNHIT1     |
| IRF7 | ZRANB2     |
| IRF8 | ABI1       |
| IRF8 | ACAP2      |
| IRF8 | ACSL5      |
| IRF8 | ACTB       |
| IRF8 | ACTR3      |
| IRF8 | ADGRG5     |
| IRF8 | AGK        |
| IRF8 | AIF1       |
| IRF8 | AKAP12     |
| IRF8 | ALAS1      |
| IRF8 | ALG10B     |
| IRF8 | ALOX5AP    |
| IRF8 | ANKRD13A   |
| IRF8 | ANKRD44    |
| IRF8 | APLP2      |
| IRF8 | ARHGAP17   |
| IRF8 | ARHGDIB    |
| IRF8 | ARHGEF2    |
| IRF8 | ARHGEF7    |
| IRF8 | ARID4B     |
| IRF8 | ARL14EP    |
| IRF8 | ARMCX6     |
| IRF8 | ARPC1B     |
| IRF8 | ARPC2      |
| IRF8 | ARPC3      |
| IRF8 | ARPC4      |
| IRF8 | ARRDC3-AS1 |
| IRF8 | ATF1       |
| IRF8 | ATF7       |
| IRF8 | ATP6V0A2   |
| IRF8 | ATXN10     |
| IRF8 | B3GLCT     |
| IRF8 | BACH2      |
| IRF8 | BAIAP2L1   |
| IRF8 | BAZ2B      |
| IRF8 | BIN3       |
| IRF8 | BIRC3      |
| IRF8 | BLCAP      |
| IRF8 | BTBD10     |
| IRF8 | BZW1       |
| IRF8 | C8orf44    |
| IRF8 | CADPS      |

|      |          |
|------|----------|
| IRF8 | CAPZA2   |
| IRF8 | CARD11   |
| IRF8 | CBWD3    |
| IRF8 | CBX3     |
| IRF8 | CCND2    |
| IRF8 | CCNT2    |
| IRF8 | CCNY     |
| IRF8 | CD180    |
| IRF8 | CD22     |
| IRF8 | CD40     |
| IRF8 | CD72     |
| IRF8 | CD79B    |
| IRF8 | CD84     |
| IRF8 | CDK13    |
| IRF8 | CEP85L   |
| IRF8 | CHD7     |
| IRF8 | CHI3L2   |
| IRF8 | CHIC2    |
| IRF8 | CHMP1B   |
| IRF8 | CIITA    |
| IRF8 | CLASRP   |
| IRF8 | CLHC1    |
| IRF8 | CNDP2    |
| IRF8 | CNFN     |
| IRF8 | COMMD6   |
| IRF8 | COR01A   |
| IRF8 | COR01B   |
| IRF8 | COX14    |
| IRF8 | CPNE5    |
| IRF8 | CPSF7    |
| IRF8 | CREB1    |
| IRF8 | CXCR5    |
| IRF8 | CYB561A3 |
| IRF8 | DAAM1    |
| IRF8 | DBNL     |
| IRF8 | DCAF12   |
| IRF8 | DDA1     |
| IRF8 | DEF8     |
| IRF8 | DENND1C  |
| IRF8 | DENND3   |
| IRF8 | DENND4A  |
| IRF8 | DHX36    |
| IRF8 | DIAPH2   |
| IRF8 | DMTF1    |
| IRF8 | DNAJB6   |
| IRF8 | DNAJC14  |
| IRF8 | DOCK11   |
| IRF8 | EIF2B2   |
| IRF8 | EIF3H    |
| IRF8 | ELF1     |

|      |            |
|------|------------|
| IRF8 | ELM01      |
| IRF8 | ELMSAN1    |
| IRF8 | ELOVL5     |
| IRF8 | EPN1       |
| IRF8 | EPS15      |
| IRF8 | EPS8       |
| IRF8 | EXOC1      |
| IRF8 | EXOC6      |
| IRF8 | EZR        |
| IRF8 | FAHD1      |
| IRF8 | FAM120A0S  |
| IRF8 | FAM129A    |
| IRF8 | FAM208B    |
| IRF8 | FAM81A     |
| IRF8 | FBX011     |
| IRF8 | FBX028     |
| IRF8 | FCRL1      |
| IRF8 | FEM1B      |
| IRF8 | FERMT3     |
| IRF8 | FMNL3      |
| IRF8 | FNTA       |
| IRF8 | FOXP4      |
| IRF8 | GABPB1-AS1 |
| IRF8 | GATAD2A    |
| IRF8 | GBA        |
| IRF8 | GCH1       |
| IRF8 | GCNT2      |
| IRF8 | GFOD1      |
| IRF8 | GHRL       |
| IRF8 | GIT2       |
| IRF8 | GLYCTK     |
| IRF8 | GMIP       |
| IRF8 | GNA13      |
| IRF8 | GNAI3      |
| IRF8 | GNB4       |
| IRF8 | GPR107     |
| IRF8 | GPR18      |
| IRF8 | GPSM3      |
| IRF8 | GRAMD1C    |
| IRF8 | GRAP       |
| IRF8 | GRIPAP1    |
| IRF8 | GSKIP      |
| IRF8 | H6PD       |
| IRF8 | HCLS1      |
| IRF8 | HELZ       |
| IRF8 | HIF1A      |
| IRF8 | HLA-DRA    |
| IRF8 | HNRNPA2B1  |
| IRF8 | HNRNPD     |
| IRF8 | HOPX       |

|      |           |
|------|-----------|
| IRF8 | HRK       |
| IRF8 | HSPA4     |
| IRF8 | IGSF10    |
| IRF8 | INIP      |
| IRF8 | INPP5B    |
| IRF8 | IQCD      |
| IRF8 | ITGB2     |
| IRF8 | ITPR1     |
| IRF8 | ITSN2     |
| IRF8 | JAK1      |
| IRF8 | JUP       |
| IRF8 | KBTBD8    |
| IRF8 | KCTD17    |
| IRF8 | KCTD5     |
| IRF8 | KLF10     |
| IRF8 | KLHL5     |
| IRF8 | KLHL6     |
| IRF8 | KRAS      |
| IRF8 | LAPTM5    |
| IRF8 | LARP7     |
| IRF8 | LCP1      |
| IRF8 | LEAP2     |
| IRF8 | LEKR1     |
| IRF8 | LIMD2     |
| IRF8 | LINC00623 |
| IRF8 | LINC00877 |
| IRF8 | LINC00886 |
| IRF8 | LLPH      |
| IRF8 | LPP       |
| IRF8 | LRMP      |
| IRF8 | LRRC8D    |
| IRF8 | LSM5      |
| IRF8 | LTB       |
| IRF8 | LY86      |
| IRF8 | LYL1      |
| IRF8 | LYN       |
| IRF8 | LYRM1     |
| IRF8 | LYSMD2    |
| IRF8 | MAP3K11   |
| IRF8 | MAPRE2    |
| IRF8 | MARCKSL1  |
| IRF8 | MCRS1     |
| IRF8 | MDM4      |
| IRF8 | MED12L    |
| IRF8 | MEF2C     |
| IRF8 | MGAT4A    |
| IRF8 | MICAL3    |
| IRF8 | MICU2     |
| IRF8 | MID1IP1   |
| IRF8 | MIR3681HG |

|      |         |
|------|---------|
| IRF8 | MKL1    |
| IRF8 | MOB1A   |
| IRF8 | MOC53   |
| IRF8 | MPP6    |
| IRF8 | MTMR12  |
| IRF8 | MTMR14  |
| IRF8 | MTMR2   |
| IRF8 | MTPN    |
| IRF8 | MY01E   |
| IRF8 | NCF1    |
| IRF8 | NCF4    |
| IRF8 | NCOA3   |
| IRF8 | NCOA7   |
| IRF8 | NDUFAF5 |
| IRF8 | NEK6    |
| IRF8 | NFATC2  |
| IRF8 | NIN     |
| IRF8 | NR6A1   |
| IRF8 | NSMCE1  |
| IRF8 | NUFIP1  |
| IRF8 | NUP153  |
| IRF8 | OSBPL10 |
| IRF8 | OXLD1   |
| IRF8 | PABPC1  |
| IRF8 | PAN2    |
| IRF8 | PARN    |
| IRF8 | PDLIM2  |
| IRF8 | PEX5    |
| IRF8 | PFKM    |
| IRF8 | PHC2    |
| IRF8 | PIAS1   |
| IRF8 | PIK3AP1 |
| IRF8 | PIK3C2B |
| IRF8 | PIP4K2A |
| IRF8 | PISD    |
| IRF8 | PITPNC1 |
| IRF8 | PLA2G6  |
| IRF8 | PLEK    |
| IRF8 | PLEKHA2 |
| IRF8 | PLEKHF2 |
| IRF8 | POLD4   |
| IRF8 | POLR2J2 |
| IRF8 | POLR3E  |
| IRF8 | PPM1N   |
| IRF8 | PPP1R18 |
| IRF8 | PPP1R21 |
| IRF8 | PPP4R3B |
| IRF8 | PQLC1   |
| IRF8 | PRKAB1  |
| IRF8 | PTAFR   |



|      |           |
|------|-----------|
| IRF8 | PTBP3     |
| IRF8 | PTDSS1    |
| IRF8 | PTK2      |
| IRF8 | PTK2B     |
| IRF8 | PTPN6     |
| IRF8 | PTPRC     |
| IRF8 | PTPRS     |
| IRF8 | PVT1      |
| IRF8 | QS0X2     |
| IRF8 | RAB11FIP1 |
| IRF8 | RAB35     |
| IRF8 | RABGAP1L  |
| IRF8 | RASGEF1B  |
| IRF8 | RASGRP3   |
| IRF8 | REL       |
| IRF8 | RFTN1     |
| IRF8 | RFX5      |
| IRF8 | RGS19     |
| IRF8 | RGS3      |
| IRF8 | RHBDF2    |
| IRF8 | RH0BTB2   |
| IRF8 | RH0H      |
| IRF8 | RNF144B   |
| IRF8 | RNF19B    |
| IRF8 | RNF44     |
| IRF8 | RPAP3     |
| IRF8 | RUFY3     |
| IRF8 | S1PR2     |
| IRF8 | SCIMP     |
| IRF8 | SEC14L1   |
| IRF8 | SERP2     |
| IRF8 | SH2B2     |
| IRF8 | SH2B3     |
| IRF8 | SH2D2A    |
| IRF8 | SH3KBP1   |
| IRF8 | SH3TC1    |
| IRF8 | SHR00M1   |
| IRF8 | SIAH2     |
| IRF8 | SIK2      |
| IRF8 | SKAP2     |
| IRF8 | SLAMF6    |
| IRF8 | SLC12A2   |
| IRF8 | SLC16A6   |
| IRF8 | SLC2A5    |
| IRF8 | SLC9A7    |
| IRF8 | SMIM14    |
| IRF8 | SMIM20    |
| IRF8 | SMUG1     |
| IRF8 | SNAP23    |
| IRF8 | SNN       |

|      |              |
|------|--------------|
| IRF8 | SNX3         |
| IRF8 | S0CS1        |
| IRF8 | SP140        |
| IRF8 | SPI1         |
| IRF8 | SPPL2A       |
| IRF8 | SS18         |
| IRF8 | STAP1        |
| IRF8 | STAT5B       |
| IRF8 | STK40        |
| IRF8 | STX7         |
| IRF8 | SULF2        |
| IRF8 | SUM01        |
| IRF8 | SUSD6        |
| IRF8 | SYBU         |
| IRF8 | SYPL1        |
| IRF8 | SYT17        |
| IRF8 | TAB1         |
| IRF8 | TADA3        |
| IRF8 | TAF7         |
| IRF8 | TAGAP        |
| IRF8 | TANK         |
| IRF8 | TBRG1        |
| IRF8 | TESPA1       |
| IRF8 | TGIF2        |
| IRF8 | TIMM10B      |
| IRF8 | TIPARP-AS1   |
| IRF8 | TMEM156      |
| IRF8 | TMEM161B-AS1 |
| IRF8 | TMSB4X       |
| IRF8 | TOB2         |
| IRF8 | TRAF3IP2     |
| IRF8 | TRAF5        |
| IRF8 | TRAPPC1      |
| IRF8 | TRIB2        |
| IRF8 | TRIM39       |
| IRF8 | TSG101       |
| IRF8 | TUBGCP4      |
| IRF8 | UBAC2-AS1    |
| IRF8 | UCP2         |
| IRF8 | UGGT1        |
| IRF8 | UGP2         |
| IRF8 | USP6NL       |
| IRF8 | VASP         |
| IRF8 | VEZF1        |
| IRF8 | VGLL4        |
| IRF8 | VNN2         |
| IRF8 | VPS18        |
| IRF8 | VTA1         |
| IRF8 | WAS          |
| IRF8 | WDR66        |

|      |            |
|------|------------|
| IRF8 | WIPF1      |
| IRF8 | YWHAZ      |
| IRF8 | ZBTB1      |
| IRF8 | ZFAND4     |
| IRF8 | ZFAND6     |
| IRF8 | ZFYVE26    |
| IRF8 | ZNF718     |
| IRF9 | AFF2       |
| IRF9 | ANKFY1     |
| IRF9 | APOBEC3G   |
| IRF9 | ARHGAP12   |
| IRF9 | ASB1       |
| IRF9 | B2M        |
| IRF9 | B4GAT1     |
| IRF9 | BBIP1      |
| IRF9 | BTAF1      |
| IRF9 | BTN3A2     |
| IRF9 | C17orf75   |
| IRF9 | CARD16     |
| IRF9 | CCR10      |
| IRF9 | CDC25C     |
| IRF9 | CEP85L     |
| IRF9 | CHST15     |
| IRF9 | CLDN14     |
| IRF9 | CLDN23     |
| IRF9 | COPS2      |
| IRF9 | COX18      |
| IRF9 | DCAF6      |
| IRF9 | EDEM3      |
| IRF9 | EIF1AD     |
| IRF9 | EIF5A      |
| IRF9 | ELOVL1     |
| IRF9 | EP300      |
| IRF9 | EPB41      |
| IRF9 | EPSTI1     |
| IRF9 | ESR2       |
| IRF9 | EXOC7      |
| IRF9 | FAH        |
| IRF9 | FAM129C    |
| IRF9 | FAM98B     |
| IRF9 | FASTKD2    |
| IRF9 | FBX038     |
| IRF9 | FGD3       |
| IRF9 | FOXO1      |
| IRF9 | GABPB1     |
| IRF9 | GABPB1-AS1 |
| IRF9 | GALNT1     |
| IRF9 | GBA        |
| IRF9 | GCSH       |
| IRF9 | GGCT       |

|      |           |
|------|-----------|
| IRF9 | HIRA      |
| IRF9 | HMG20A    |
| IRF9 | HOXB2     |
| IRF9 | IFI35     |
| IRF9 | IFI44L    |
| IRF9 | IFI6      |
| IRF9 | IFIT1     |
| IRF9 | IL15RA    |
| IRF9 | IP6K1     |
| IRF9 | IRF7      |
| IRF9 | IRF9      |
| IRF9 | ISG15     |
| IRF9 | ITM2B     |
| IRF9 | JCHAIN    |
| IRF9 | JOSD1     |
| IRF9 | KIAA1551  |
| IRF9 | KLHDC4    |
| IRF9 | KMO       |
| IRF9 | KNOP1     |
| IRF9 | LIMK2     |
| IRF9 | LTBP3     |
| IRF9 | LY6E      |
| IRF9 | MAN1A1    |
| IRF9 | MARCH8    |
| IRF9 | MBNL1-AS1 |
| IRF9 | MCTP2     |
| IRF9 | MED23     |
| IRF9 | MIA3      |
| IRF9 | MKLN1     |
| IRF9 | MRPL35    |
| IRF9 | MRPL43    |
| IRF9 | MRPS14    |
| IRF9 | MYL4      |
| IRF9 | NAA15     |
| IRF9 | NAAA      |
| IRF9 | NFATC2    |
| IRF9 | NPPA-AS1  |
| IRF9 | NRR0S     |
| IRF9 | OAS1      |
| IRF9 | OTUD5     |
| IRF9 | PARP14    |
| IRF9 | PBX2      |
| IRF9 | PDGFD     |
| IRF9 | PHACTR1   |
| IRF9 | PLAC8     |
| IRF9 | PLEKHH3   |
| IRF9 | POLR3B    |
| IRF9 | PPP1R12A  |
| IRF9 | PPP1R14A  |
| IRF9 | PRIM2     |

|      |              |
|------|--------------|
| IRF9 | PRKX         |
| IRF9 | PRR7         |
| IRF9 | PSMG3        |
| IRF9 | PYCARD       |
| IRF9 | RAD51AP1     |
| IRF9 | RNF146       |
| IRF9 | ROCK2        |
| IRF9 | RPL26L1      |
| IRF9 | RSAD2        |
| IRF9 | RSPH14       |
| IRF9 | SAPCD2       |
| IRF9 | SELL         |
| IRF9 | SGPP1        |
| IRF9 | SH3BP5       |
| IRF9 | SLC39A11     |
| IRF9 | SNX12        |
| IRF9 | ST3GAL5      |
| IRF9 | STAT1        |
| IRF9 | STK26        |
| IRF9 | STK4         |
| IRF9 | TAC01        |
| IRF9 | TGIF1        |
| IRF9 | TMEM161B-AS1 |
| IRF9 | TMEM9        |
| IRF9 | TMX4         |
| IRF9 | TP53I11      |
| IRF9 | TRIM22       |
| IRF9 | TRIM36       |
| IRF9 | TRIM4        |
| IRF9 | TSEN34       |
| IRF9 | TTN-AS1      |
| IRF9 | UBA1         |
| IRF9 | UBE2L6       |
| IRF9 | UBE4A        |
| IRF9 | UNC93B1      |
| IRF9 | USF2         |
| IRF9 | USP18        |
| IRF9 | VPS13C       |
| IRF9 | WIPF2        |
| IRF9 | XAF1         |
| IRF9 | YWHAG        |
| IRF9 | ZDHHC13      |
| IRF9 | ZNF141       |
| IRF9 | ZNF804A      |
| IRF9 | ZW10         |
| JDP2 | BNIP3L       |
| JDP2 | JDP2         |
| JDP2 | MKL1         |
| JDP2 | NSMF         |
| JDP2 | POGZ         |

|     |          |
|-----|----------|
| JUN | ABHD13   |
| JUN | ACAP1    |
| JUN | ADAM28   |
| JUN | AG02     |
| JUN | AG03     |
| JUN | AIG1     |
| JUN | AKAP9    |
| JUN | ALG13    |
| JUN | AMIG02   |
| JUN | AMZ2     |
| JUN | ANKRD11  |
| JUN | ANKRD12  |
| JUN | ANKRD28  |
| JUN | ANKRD37  |
| JUN | AP1S2    |
| JUN | AP4S1    |
| JUN | AREG     |
| JUN | ARHGAP15 |
| JUN | ARHGAP17 |
| JUN | ARHGAP27 |
| JUN | ARHGEF3  |
| JUN | ARHGEF6  |
| JUN | ARL1     |
| JUN | ARL17B   |
| JUN | ARRB2    |
| JUN | ATF2     |
| JUN | ATF6     |
| JUN | ATG13    |
| JUN | ATP6V0A1 |
| JUN | ATXN1L   |
| JUN | ATXN3    |
| JUN | B2M      |
| JUN | B4GALT3  |
| JUN | BAZ2B    |
| JUN | BBX      |
| JUN | BCAR3    |
| JUN | BDP1     |
| JUN | BMP7     |
| JUN | BRAF     |
| JUN | BSDC1    |
| JUN | BTG1     |
| JUN | BTG2     |
| JUN | C12orf42 |
| JUN | C14orf93 |
| JUN | C15orf61 |
| JUN | C2orf74  |
| JUN | CA2      |
| JUN | CALCOC01 |
| JUN | CAST     |
| JUN | CBX4     |

|     |          |
|-----|----------|
| JUN | CCDC117  |
| JUN | CCDC144A |
| JUN | CCDC47   |
| JUN | CCND2    |
| JUN | CCNL1    |
| JUN | CCPG1    |
| JUN | CCR6     |
| JUN | CD47     |
| JUN | CD55     |
| JUN | CD63     |
| JUN | CDCA8    |
| JUN | CDK11B   |
| JUN | CDKN1A   |
| JUN | CEBPB    |
| JUN | CEBPG    |
| JUN | CELF2    |
| JUN | CENPE    |
| JUN | CHD6     |
| JUN | CHMP1B   |
| JUN | CHPF     |
| JUN | CHRNB1   |
| JUN | CITED2   |
| JUN | CLK1     |
| JUN | CLK4     |
| JUN | CMTM6    |
| JUN | COL19A1  |
| JUN | COLGALT1 |
| JUN | COMMD1   |
| JUN | COR01C   |
| JUN | CREBZF   |
| JUN | CRYBB2   |
| JUN | CSRNP1   |
| JUN | CTBP1    |
| JUN | CTR9     |
| JUN | CXCR4    |
| JUN | CYLD     |
| JUN | CYSLTR1  |
| JUN | CYTIP    |
| JUN | DDIT4    |
| JUN | DDX10    |
| JUN | DDX5     |
| JUN | DEDD2    |
| JUN | DENND4A  |
| JUN | DESI1    |
| JUN | DHCR7    |
| JUN | DHRS7B   |
| JUN | DNAJB1   |
| JUN | DNAJB9   |
| JUN | DNAJC13  |
| JUN | DUSP1    |

|     |           |
|-----|-----------|
| JUN | EGR1      |
| JUN | EIF4A2    |
| JUN | ELL       |
| JUN | EMC10     |
| JUN | EMC2      |
| JUN | EMP3      |
| JUN | EP300     |
| JUN | EPC1      |
| JUN | ESC01     |
| JUN | ESYT1     |
| JUN | ETS1      |
| JUN | ETV2      |
| JUN | FAM177B   |
| JUN | FANCF     |
| JUN | FBXW7     |
| JUN | FKBP2     |
| JUN | FKBPL     |
| JUN | FLCN      |
| JUN | FMNL1     |
| JUN | FMR1      |
| JUN | FNDC3A    |
| JUN | FOS       |
| JUN | FOSB      |
| JUN | FOXP1     |
| JUN | FUBP1     |
| JUN | G3BP2     |
| JUN | GABPB1    |
| JUN | GAN       |
| JUN | GCC1      |
| JUN | GCC2      |
| JUN | GFOD1     |
| JUN | GIGYF2    |
| JUN | GLIPR1    |
| JUN | GMFB      |
| JUN | GMPPB     |
| JUN | GNB1L     |
| JUN | GNG4      |
| JUN | GPKOW     |
| JUN | GPR146    |
| JUN | GRK6      |
| JUN | GSAP      |
| JUN | GSKIP     |
| JUN | GTSF1     |
| JUN | HBP1      |
| JUN | HECTD4    |
| JUN | HERPUD1   |
| JUN | HERPUD2   |
| JUN | HIP1R     |
| JUN | HIST1H2BG |
| JUN | HIST2H2BE |



|     |           |
|-----|-----------|
| JUN | H00K3     |
| JUN | H0TAIRM1  |
| JUN | H0XB7     |
| JUN | HPS5      |
| JUN | HSPA1A    |
| JUN | HSPA2     |
| JUN | HYPK      |
| JUN | ICAM2     |
| JUN | IER2      |
| JUN | IFNGR1    |
| JUN | IFRD1     |
| JUN | IGSF8     |
| JUN | IL15RA    |
| JUN | ING4      |
| JUN | INSR      |
| JUN | ITM2B     |
| JUN | ITM2C     |
| JUN | JUN       |
| JUN | JUNB      |
| JUN | JUND      |
| JUN | KCNMA1    |
| JUN | KCNN4     |
| JUN | KLF2      |
| JUN | KLF6      |
| JUN | KLF7      |
| JUN | KMT2E     |
| JUN | KMT2E-AS1 |
| JUN | LAPTM4A   |
| JUN | LARP1B    |
| JUN | LDLRAD4   |
| JUN | LETMD1    |
| JUN | LILRB3    |
| JUN | LINC00886 |
| JUN | LINC00926 |
| JUN | LMBRD1    |
| JUN | LPIN1     |
| JUN | LSG1      |
| JUN | LTN1      |
| JUN | LYST      |
| JUN | MAFB      |
| JUN | MAGOHB    |
| JUN | MARCH8    |
| JUN | MBD1      |
| JUN | MBP       |
| JUN | MBTPS1    |
| JUN | MCL1      |
| JUN | MEF2C     |
| JUN | MEST      |
| JUN | MIEF1     |
| JUN | MKRN2     |

|     |          |
|-----|----------|
| JUN | MLEC     |
| JUN | MOSPD3   |
| JUN | MRPL40   |
| JUN | MRPS18B  |
| JUN | MYADM    |
| JUN | N4BP2L1  |
| JUN | NADK     |
| JUN | NAPA-AS1 |
| JUN | NCBP1    |
| JUN | NCK2     |
| JUN | NDEL1    |
| JUN | NDRG1    |
| JUN | NDUFA5   |
| JUN | NDUFS2   |
| JUN | NDUFV3   |
| JUN | NEAT1    |
| JUN | NEK9     |
| JUN | NEMF     |
| JUN | NF1      |
| JUN | NFKB2    |
| JUN | NMD3     |
| JUN | NME4     |
| JUN | NR4A2    |
| JUN | NR4A3    |
| JUN | NRDC     |
| JUN | NRL      |
| JUN | NSUN4    |
| JUN | NUDCD2   |
| JUN | NUDT3    |
| JUN | NXT2     |
| JUN | ODF2L    |
| JUN | P2RX1    |
| JUN | P2RY10   |
| JUN | PARM1    |
| JUN | PCIF1    |
| JUN | PDE4B    |
| JUN | PDK2     |
| JUN | PFKFB3   |
| JUN | PHF1     |
| JUN | PHF19    |
| JUN | PHF20L1  |
| JUN | PHF21A   |
| JUN | PHRF1    |
| JUN | PKIG     |
| JUN | PLD3     |
| JUN | PLEKH01  |
| JUN | PLOD1    |
| JUN | PLPP5    |
| JUN | PMAIP1   |
| JUN | PNOC     |

|     |           |
|-----|-----------|
| JUN | PNPLA4    |
| JUN | PNRC1     |
| JUN | PPM1B     |
| JUN | PPM1K     |
| JUN | PPP1R15A  |
| JUN | PPP1R37   |
| JUN | PRCC      |
| JUN | PRDX4     |
| JUN | PRKAB2    |
| JUN | PSAT1     |
| JUN | PSMB8-AS1 |
| JUN | PSME3     |
| JUN | PTPRJ     |
| JUN | PWWP2B    |
| JUN | RALGPS2   |
| JUN | RB1       |
| JUN | RCE1      |
| JUN | RELA      |
| JUN | RFK       |
| JUN | RGS1      |
| JUN | RHBDD1    |
| JUN | RHEB      |
| JUN | RHOB      |
| JUN | RND1      |
| JUN | RNF103    |
| JUN | RNF11     |
| JUN | RPL13     |
| JUN | RPL34     |
| JUN | RPLP2     |
| JUN | RPS27     |
| JUN | RPS27A    |
| JUN | RPS29     |
| JUN | RRBP1     |
| JUN | RSPRY1    |
| JUN | S1PR4     |
| JUN | SARAF     |
| JUN | SCFD1     |
| JUN | SCLT1     |
| JUN | SDCBP     |
| JUN | SEC14L1   |
| JUN | SEC22C    |
| JUN | SELL      |
| JUN | SEPT9     |
| JUN | SETBP1    |
| JUN | SGK1      |
| JUN | SH2D3A    |
| JUN | SIAH1     |
| JUN | SLC25A28  |
| JUN | SLC35A5   |
| JUN | SLC35F5   |

|     |          |
|-----|----------|
| JUN | SLC38A2  |
| JUN | SLC39A11 |
| JUN | SLC7A7   |
| JUN | SMARCA2  |
| JUN | SMCHD1   |
| JUN | SMIM14   |
| JUN | SNX2     |
| JUN | SOX4     |
| JUN | SPATA2   |
| JUN | SPRY1    |
| JUN | SPTY2D1  |
| JUN | SRD5A3   |
| JUN | SRGAP2   |
| JUN | SSR4     |
| JUN | ST6GAL1  |
| JUN | ST8SIA4  |
| JUN | STX5     |
| JUN | SUB1     |
| JUN | SUN1     |
| JUN | SUN2     |
| JUN | SYNGR1   |
| JUN | TAGLN2   |
| JUN | TAX1BP1  |
| JUN | TCAIM    |
| JUN | TES      |
| JUN | TFRC     |
| JUN | TIGAR    |
| JUN | TIPARP   |
| JUN | TMC03    |
| JUN | TMED4    |
| JUN | TMED7    |
| JUN | TMSB4X   |
| JUN | TMSB4Y   |
| JUN | TNFAIP3  |
| JUN | TNFAIP8  |
| JUN | TNRC6B   |
| JUN | TOLLIP   |
| JUN | TPM4     |
| JUN | TPT1     |
| JUN | TRA2A    |
| JUN | TRIB1    |
| JUN | TROAP    |
| JUN | TRPM7    |
| JUN | TSC22D3  |
| JUN | TSHZ2    |
| JUN | TSPAN31  |
| JUN | TSPYL2   |
| JUN | TTC21A   |
| JUN | TTC3     |
| JUN | TTI1     |

|      |         |
|------|---------|
| JUN  | TWF1    |
| JUN  | U2AF1L4 |
| JUN  | UAP1    |
| JUN  | UBB     |
| JUN  | UBC     |
| JUN  | UBE2S   |
| JUN  | UBE2V1  |
| JUN  | UBN2    |
| JUN  | USP51   |
| JUN  | UTP23   |
| JUN  | VAMP3   |
| JUN  | WDR33   |
| JUN  | WDR74   |
| JUN  | WIPF2   |
| JUN  | WIPI1   |
| JUN  | WRB     |
| JUN  | XBP1    |
| JUN  | XPOT    |
| JUN  | XXYLT1  |
| JUN  | YIPF6   |
| JUN  | YPEL2   |
| JUN  | YPEL5   |
| JUN  | YTHDC1  |
| JUN  | ZBTB1   |
| JUN  | ZBTB16  |
| JUN  | ZBTB17  |
| JUN  | ZBTB48  |
| JUN  | ZC3H12D |
| JUN  | ZC3H4   |
| JUN  | ZDHHC8  |
| JUN  | ZFAND2A |
| JUN  | ZFC3H1  |
| JUN  | ZFHX3   |
| JUN  | ZFP36   |
| JUN  | ZFP36L1 |
| JUN  | ZFP36L2 |
| JUN  | ZNF184  |
| JUN  | ZNF274  |
| JUN  | ZNF407  |
| JUN  | ZNF426  |
| JUN  | ZNF598  |
| JUN  | ZNF668  |
| JUN  | ZNF746  |
| JUN  | ZNF790  |
| JUN  | ZNHIT2  |
| JUNB | ACAP1   |
| JUNB | ADAM28  |
| JUNB | AHCYL1  |
| JUNB | AHNAK   |
| JUNB | ANKRD11 |

JUNB ANKRD12  
JUNB AP2B1  
JUNB ARHGAP24  
JUNB ARHGAP5  
JUNB ARID5A  
JUNB ARID5B  
JUNB ARL4C  
JUNB ARMCX3  
JUNB ATRX  
JUNB BAZ2B  
JUNB BTAF1  
JUNB BTG1  
JUNB BTG2  
JUNB CCNL1  
JUNB CDC5L  
JUNB CDKN2C  
JUNB CELF2  
JUNB CHD2  
JUNB CIC  
JUNB CLASP2  
JUNB CLEC2B  
JUNB CLIP2  
JUNB CNFN  
JUNB COPB2  
JUNB CREBRF  
JUNB CSNK1D  
JUNB CSNK1G2  
JUNB CSNK1G3  
JUNB CTGF  
JUNB CTNNA1  
JUNB CXCL16  
JUNB CYLD  
JUNB CYSTM1  
JUNB CYTIP  
JUNB DUSP1  
JUNB DUSP14  
JUNB DUSP2  
JUNB EEF1D  
JUNB EGR1  
JUNB EGR2  
JUNB EIF1  
JUNB EIF4A2  
JUNB EPHB6  
JUNB ERF  
JUNB FAM3C  
JUNB FAM91A1  
JUNB FGD2  
JUNB FOS  
JUNB FOSB  
JUNB FOXP1

JUNB GCC1  
JUNB GOLPH3  
JUNB GPBP1  
JUNB GPR183  
JUNB GPRC5C  
JUNB HERPUD1  
JUNB HES1  
JUNB HOMER2  
JUNB HPCAL1  
JUNB HYOU1  
JUNB ID3  
JUNB IER2  
JUNB IMPDH2  
JUNB INPP1  
JUNB IRF2BP2  
JUNB JOSD1  
JUNB JUN  
JUNB JUNB  
JUNB KCNA3  
JUNB KLF6  
JUNB KMT2E  
JUNB KMT2E-AS1  
JUNB LBH  
JUNB LIG4  
JUNB LMBRD1  
JUNB LTN1  
JUNB LUZP1  
JUNB MAP4  
JUNB MEF2C  
JUNB MEF2D  
JUNB MKL1  
JUNB MXI1  
JUNB NDEL1  
JUNB NEAT1  
JUNB NR4A1  
JUNB NR4A2  
JUNB ODF2L  
JUNB ORMDL3  
JUNB PABPC1  
JUNB PDE4B  
JUNB PDXDC1  
JUNB PHACTR1  
JUNB PLEKH01  
JUNB PNRC1  
JUNB PPP1R15A  
JUNB PRDM2  
JUNB PRDM8  
JUNB PSD3  
JUNB RALGPS2  
JUNB RARA

|      |           |
|------|-----------|
| JUNB | REL       |
| JUNB | RNF141    |
| JUNB | RNFT1     |
| JUNB | RPL13     |
| JUNB | RPL18     |
| JUNB | RPL21     |
| JUNB | RPL23     |
| JUNB | RPL34     |
| JUNB | RPL38     |
| JUNB | RPL6      |
| JUNB | RPL9      |
| JUNB | RPLP2     |
| JUNB | RPS29     |
| JUNB | RPS3A     |
| JUNB | RRBP1     |
| JUNB | RUNX3     |
| JUNB | SARAF     |
| JUNB | SBN02     |
| JUNB | SCAF11    |
| JUNB | SCYL2     |
| JUNB | SEC16A    |
| JUNB | SFXN3     |
| JUNB | SGK1      |
| JUNB | SGK3      |
| JUNB | SHISA5    |
| JUNB | SIAH1     |
| JUNB | SIAH2     |
| JUNB | SLC10A3   |
| JUNB | SLC7A6    |
| JUNB | SMAD3     |
| JUNB | SMCHD1    |
| JUNB | SOCS3     |
| JUNB | SP110     |
| JUNB | SPATA2L   |
| JUNB | SPOCK2    |
| JUNB | SSR4      |
| JUNB | STAMBPL1  |
| JUNB | STT3A     |
| JUNB | STXBP3    |
| JUNB | TBL1X     |
| JUNB | TMF1      |
| JUNB | TMSB4X    |
| JUNB | TNFRSF12A |
| JUNB | TNFRSF1B  |
| JUNB | TP53I11   |
| JUNB | TPT1      |
| JUNB | TRAF1     |
| JUNB | TRIB1     |
| JUNB | TRIM73    |
| JUNB | TSC22D3   |



JUNB TSHZ2  
JUNB TSPYL2  
JUNB TTC19  
JUNB TTC3  
JUNB TXNDC5  
JUNB UBC  
JUNB USP8  
JUNB VRK2  
JUNB YPEL2  
JUNB YWHAZ  
JUNB ZC3H12A  
JUNB ZC3H6  
JUNB ZEB2  
JUNB ZFP36  
JUNB ZFP36L1  
JUNB ZFP36L2  
JUND ACBD4  
JUND ACER3  
JUND AGA  
JUND AKT2  
JUND ANAPC1  
JUND ARAP2  
JUND ARID4B  
JUND ARRDC3-AS1  
JUND ASCC1  
JUND ASPSCR1  
JUND ATF7IP  
JUND AURKB  
JUND B3GAT3  
JUND BCL11A  
JUND BOLA3-AS1  
JUND BRAF  
JUND BTG1  
JUND C18orf21  
JUND C5orf30  
JUND CACUL1  
JUND CADPS  
JUND CANT1  
JUND CBLL1  
JUND CCDC59  
JUND CCDC61  
JUND CCNE2  
JUND CCNT1  
JUND CDC37L1  
JUND CDYL  
JUND CEBPG  
JUND CEP83  
JUND CERS6  
JUND CHST15  
JUND CNKSR2

|      |           |
|------|-----------|
| JUND | CXCR4     |
| JUND | CYB5R2    |
| JUND | DDX17     |
| JUND | DDX6      |
| JUND | DEDD      |
| JUND | DESI1     |
| JUND | DUSP1     |
| JUND | DUSP2     |
| JUND | DUSP5     |
| JUND | E4F1      |
| JUND | EEF1D     |
| JUND | EFCAB14   |
| JUND | EGR1      |
| JUND | EIF2S3    |
| JUND | EML3      |
| JUND | ERF       |
| JUND | FAM76A    |
| JUND | FANCC     |
| JUND | FBXL3     |
| JUND | FBX031    |
| JUND | FBXW2     |
| JUND | FDFT1     |
| JUND | FKBP15    |
| JUND | FOS       |
| JUND | FOSB      |
| JUND | FOSL1     |
| JUND | FOXN3     |
| JUND | FZD3      |
| JUND | GADD45B   |
| JUND | GADD45G   |
| JUND | GALK2     |
| JUND | GAS7      |
| JUND | GATAD2B   |
| JUND | GNG7      |
| JUND | GORASP1   |
| JUND | GOT2      |
| JUND | GRK2      |
| JUND | GTF2A1    |
| JUND | GTPBP1    |
| JUND | HCG18     |
| JUND | HIST1H2AG |
| JUND | HIST1H2AH |
| JUND | HIST1H2AJ |
| JUND | HIST1H2AL |
| JUND | HIST1H4E  |
| JUND | HMGCS1    |
| JUND | HSPA1A    |
| JUND | HSPA2     |
| JUND | IER2      |
| JUND | IER5      |

|      |            |
|------|------------|
| JUND | IFRD1      |
| JUND | IGFBP4     |
| JUND | ING1       |
| JUND | IQCG       |
| JUND | IQGAP2     |
| JUND | JMJD1C     |
| JUND | JUN        |
| JUND | JUND       |
| JUND | KLF10      |
| JUND | KLF3       |
| JUND | KLHL22     |
| JUND | KMT2E      |
| JUND | LANCL2     |
| JUND | LARP1B     |
| JUND | LINS1      |
| JUND | LLGL1      |
| JUND | LM04       |
| JUND | MAFB       |
| JUND | MAGOHB     |
| JUND | MAP1B      |
| JUND | MAPK10     |
| JUND | MARCH3     |
| JUND | MARCH5     |
| JUND | MBD6       |
| JUND | MED12L     |
| JUND | MEF2C      |
| JUND | MEST       |
| JUND | METRNL     |
| JUND | METTLL13   |
| JUND | MLX        |
| JUND | MSANTD2    |
| JUND | MUL1       |
| JUND | NAB2       |
| JUND | NDFIP2     |
| JUND | NEK1       |
| JUND | NELFA      |
| JUND | NFATC3     |
| JUND | NFE2L1     |
| JUND | NFKBID     |
| JUND | NKIRAS1    |
| JUND | NR4A1      |
| JUND | NUDCD3     |
| JUND | NUDT9      |
| JUND | NUP98      |
| JUND | NUTM2A-AS1 |
| JUND | ODF2L      |
| JUND | OSTM1      |
| JUND | PAK1       |
| JUND | PAK1IP1    |
| JUND | PAN3       |

|      |         |
|------|---------|
| JUND | PARP2   |
| JUND | PARP6   |
| JUND | PCIF1   |
| JUND | PDE7A   |
| JUND | PDE9A   |
| JUND | PFKFB3  |
| JUND | PGS1    |
| JUND | PIM3    |
| JUND | PITPNB  |
| JUND | PLCG2   |
| JUND | PLEKH01 |
| JUND | PLK2    |
| JUND | PNMA1   |
| JUND | PNP0    |
| JUND | PPP1R10 |
| JUND | PPP1R2  |
| JUND | PPP4R3A |
| JUND | PRKCSH  |
| JUND | PTP4A1  |
| JUND | QTRT2   |
| JUND | RAD9A   |
| JUND | RBM15B  |
| JUND | REL     |
| JUND | RFX1    |
| JUND | RICTOR  |
| JUND | RUBCN   |
| JUND | SACM1L  |
| JUND | SACS    |
| JUND | SESN1   |
| JUND | SLC20A1 |
| JUND | SLC27A4 |
| JUND | SLC2A3  |
| JUND | SLC35F5 |
| JUND | SLC38A2 |
| JUND | SMG7    |
| JUND | SMU1    |
| JUND | SNX12   |
| JUND | S0CS3   |
| JUND | SPATA2  |
| JUND | SPHK2   |
| JUND | SPOP    |
| JUND | SPTLC1  |
| JUND | SRGAP2  |
| JUND | SRSF5   |
| JUND | ST3GAL5 |
| JUND | STAMPB  |
| JUND | STIL    |
| JUND | STX4    |
| JUND | SUV39H1 |
| JUND | TBC1D9  |

|       |           |
|-------|-----------|
| JUND  | TFDP2     |
| JUND  | TIMM10B   |
| JUND  | TMEM189   |
| JUND  | TMEM33    |
| JUND  | TNFAIP8L2 |
| JUND  | TPRG1L    |
| JUND  | TRAF5     |
| JUND  | TRIM33    |
| JUND  | TSC22D3   |
| JUND  | TSPYL2    |
| JUND  | TTC27     |
| JUND  | UBAP1     |
| JUND  | UGCG      |
| JUND  | UGGT2     |
| JUND  | USF2      |
| JUND  | VPS37B    |
| JUND  | WDR82     |
| JUND  | WIPI1     |
| JUND  | WIZ       |
| JUND  | WNK1      |
| JUND  | WWP2      |
| JUND  | ZFAND3    |
| JUND  | ZFP36     |
| JUND  | ZNF18     |
| JUND  | ZNF2      |
| JUND  | ZNF426    |
| JUND  | ZNF558    |
| JUND  | ZNF747    |
| KLF11 | ACP5      |
| KLF11 | ARHGAP17  |
| KLF11 | CHST11    |
| KLF11 | FAM160A2  |
| KLF11 | HOMER2    |
| KLF11 | IRF5      |
| KLF11 | MTSS1     |
| KLF11 | PGAP2     |
| KLF11 | RNASEH1   |
| KLF11 | ZCWPW1    |
| KLF12 | AGPAT2    |
| KLF12 | AHNAK     |
| KLF12 | ALDH2     |
| KLF12 | AMZ2      |
| KLF12 | ARRDC1    |
| KLF12 | BACH2     |
| KLF12 | BARD1     |
| KLF12 | CARD19    |
| KLF12 | CDC42SE2  |
| KLF12 | DAAM1     |
| KLF12 | DTD2      |
| KLF12 | ELL       |

|       |          |
|-------|----------|
| KLF12 | FAAP20   |
| KLF12 | FAM3C    |
| KLF12 | FLNA     |
| KLF12 | FOXO3    |
| KLF12 | GDPD5    |
| KLF12 | HSDL2    |
| KLF12 | KIZ      |
| KLF12 | KLF12    |
| KLF12 | LAPTM5   |
| KLF12 | LEMD2    |
| KLF12 | LXN      |
| KLF12 | MAPRE2   |
| KLF12 | MARCKSL1 |
| KLF12 | NEIL3    |
| KLF12 | NLK      |
| KLF12 | NRDE2    |
| KLF12 | PAK1     |
| KLF12 | PFKP     |
| KLF12 | PIDD1    |
| KLF12 | PNKP     |
| KLF12 | RABEP2   |
| KLF12 | RELB     |
| KLF12 | SLAIN2   |
| KLF12 | SLC4A7   |
| KLF12 | SYT17    |
| KLF12 | TARDBP   |
| KLF12 | TCF25    |
| KLF12 | TRAIIP   |
| KLF12 | ZFAND6   |
| KLF13 | ABCB9    |
| KLF13 | ABHD14A  |
| KLF13 | ABHD8    |
| KLF13 | ACADS    |
| KLF13 | ACADVL   |
| KLF13 | ACAP1    |
| KLF13 | AC02     |
| KLF13 | AC0XL    |
| KLF13 | ACSS1    |
| KLF13 | ADM      |
| KLF13 | AEBP1    |
| KLF13 | AGA      |
| KLF13 | AGPAT2   |
| KLF13 | AHCYL2   |
| KLF13 | AIFM2    |
| KLF13 | AKAP13   |
| KLF13 | AKAP8L   |
| KLF13 | AKT1S1   |
| KLF13 | ALAD     |
| KLF13 | ALDH6A1  |
| KLF13 | ALDOC    |

|       |          |
|-------|----------|
| KLF13 | ALG14    |
| KLF13 | ALG2     |
| KLF13 | ALG3     |
| KLF13 | ALKBH7   |
| KLF13 | ANAPC16  |
| KLF13 | ANG      |
| KLF13 | ANKHD1   |
| KLF13 | ANKRD10  |
| KLF13 | ANKRD28  |
| KLF13 | ANKS3    |
| KLF13 | ANXA2    |
| KLF13 | ANXA6    |
| KLF13 | AP3D1    |
| KLF13 | ARF1     |
| KLF13 | ARF5     |
| KLF13 | ARFGAP3  |
| KLF13 | ARHGAP18 |
| KLF13 | ARID3A   |
| KLF13 | ARID4A   |
| KLF13 | ARID5A   |
| KLF13 | ARMCX3   |
| KLF13 | ARMCX5   |
| KLF13 | ATG4C    |
| KLF13 | ATP13A1  |
| KLF13 | ATP6AP2  |
| KLF13 | ATP6V0A1 |
| KLF13 | ATXN2    |
| KLF13 | AUNIP    |
| KLF13 | B4GALT3  |
| KLF13 | B9D1     |
| KLF13 | BACH1    |
| KLF13 | BAK1     |
| KLF13 | BCAP31   |
| KLF13 | BCKDHA   |
| KLF13 | BCL2L11  |
| KLF13 | BCLAF1   |
| KLF13 | BEX4     |
| KLF13 | BEX5     |
| KLF13 | BHLHE41  |
| KLF13 | BNIP1    |
| KLF13 | BNIP3L   |
| KLF13 | BORCS5   |
| KLF13 | BORCS8   |
| KLF13 | BSDC1    |
| KLF13 | BST2     |
| KLF13 | BTAF1    |
| KLF13 | BTG2     |
| KLF13 | C11orf24 |
| KLF13 | C15orf39 |
| KLF13 | C19orf81 |

|       |           |
|-------|-----------|
| KLF13 | C1GALT1C1 |
| KLF13 | C21orf2   |
| KLF13 | C4orf33   |
| KLF13 | CACTIN    |
| KLF13 | CADM1     |
| KLF13 | CALCOC01  |
| KLF13 | CALU      |
| KLF13 | CAMKK2    |
| KLF13 | CAPNS1    |
| KLF13 | CBWD5     |
| KLF13 | CBX8      |
| KLF13 | CCDC167   |
| KLF13 | CCDC186   |
| KLF13 | CCDC61    |
| KLF13 | CCL25     |
| KLF13 | CCM2      |
| KLF13 | CCNL1     |
| KLF13 | CD38      |
| KLF13 | CD46      |
| KLF13 | CD55      |
| KLF13 | CD63      |
| KLF13 | CD9       |
| KLF13 | CDK12     |
| KLF13 | CDK17     |
| KLF13 | CDK2AP2   |
| KLF13 | CDV3      |
| KLF13 | CEBPB     |
| KLF13 | CERS2     |
| KLF13 | CHAC1     |
| KLF13 | CHD2      |
| KLF13 | CHD6      |
| KLF13 | CHID1     |
| KLF13 | CHPF      |
| KLF13 | CHRNB1    |
| KLF13 | CHST12    |
| KLF13 | CHST2     |
| KLF13 | CLCC1     |
| KLF13 | CLIC1     |
| KLF13 | CLINT1    |
| KLF13 | CLIP4     |
| KLF13 | CNOT6L    |
| KLF13 | COPB1     |
| KLF13 | COPB2     |
| KLF13 | COPZ1     |
| KLF13 | COX6B1    |
| KLF13 | COX7A2L   |
| KLF13 | CPEB4     |
| KLF13 | CPQ       |
| KLF13 | CREB3L2   |
| KLF13 | CRK       |



|       |            |
|-------|------------|
| KLF13 | CSGALNACT2 |
| KLF13 | CSNK1E     |
| KLF13 | CTR9       |
| KLF13 | CTSB       |
| KLF13 | CTSD       |
| KLF13 | CUTA       |
| KLF13 | CYB561D2   |
| KLF13 | CYTH2      |
| KLF13 | CYTH4      |
| KLF13 | DAD1       |
| KLF13 | DAP        |
| KLF13 | DCAF12     |
| KLF13 | DDAH2      |
| KLF13 | DDB1       |
| KLF13 | DDOST      |
| KLF13 | DDRKG1     |
| KLF13 | DEDD2      |
| KLF13 | DERL3      |
| KLF13 | DEXI       |
| KLF13 | DGAT1      |
| KLF13 | DHDDS      |
| KLF13 | DHRS1      |
| KLF13 | DHRS9      |
| KLF13 | DLAT       |
| KLF13 | DNAJC1     |
| KLF13 | DNAJC12    |
| KLF13 | DNAJC3     |
| KLF13 | DNAJC4     |
| KLF13 | DNASE2     |
| KLF13 | DPAGT1     |
| KLF13 | DSTN       |
| KLF13 | DYNLL2     |
| KLF13 | EDEM1      |
| KLF13 | EDEM2      |
| KLF13 | EDEM3      |
| KLF13 | EFCAB14    |
| KLF13 | EFHC1      |
| KLF13 | EI24       |
| KLF13 | EIF2AK4    |
| KLF13 | EIF4G1     |
| KLF13 | ELK3       |
| KLF13 | ELL        |
| KLF13 | ELL2       |
| KLF13 | EMC2       |
| KLF13 | EMC3       |
| KLF13 | EML2       |
| KLF13 | ENTPD1     |
| KLF13 | EPB41      |
| KLF13 | ERC1       |
| KLF13 | ERGIC2     |

|       |         |
|-------|---------|
| KLF13 | ERGIC3  |
| KLF13 | ERN1    |
| KLF13 | ER01B   |
| KLF13 | ETFB    |
| KLF13 | EYA3    |
| KLF13 | FAF1    |
| KLF13 | FAM213A |
| KLF13 | FAM3C   |
| KLF13 | FAM91A1 |
| KLF13 | FANCE   |
| KLF13 | FBXL15  |
| KLF13 | FHOD1   |
| KLF13 | FICD    |
| KLF13 | FKBP2   |
| KLF13 | FLYWCH2 |
| KLF13 | FN3KRP  |
| KLF13 | FOXN3   |
| KLF13 | FUCA2   |
| KLF13 | FU0M    |
| KLF13 | FUT8    |
| KLF13 | G6PC3   |
| KLF13 | G6PD    |
| KLF13 | GALM    |
| KLF13 | GANAB   |
| KLF13 | GGCX    |
| KLF13 | GIGYF2  |
| KLF13 | GLCCI1  |
| KLF13 | GM2A    |
| KLF13 | GMPPA   |
| KLF13 | GNAI2   |
| KLF13 | GNAS    |
| KLF13 | GOLGA2  |
| KLF13 | GOLGA3  |
| KLF13 | GOLGA5  |
| KLF13 | GOLGA8B |
| KLF13 | GOLGB1  |
| KLF13 | GPHN    |
| KLF13 | GPR108  |
| KLF13 | GPR155  |
| KLF13 | GPR160  |
| KLF13 | GPR89B  |
| KLF13 | GPSM3   |
| KLF13 | GRAMD4  |
| KLF13 | GRK6    |
| KLF13 | GRN     |
| KLF13 | GSTM3   |
| KLF13 | GSTM4   |
| KLF13 | GUCD1   |
| KLF13 | GYG1    |
| KLF13 | H1FX    |

|       |           |
|-------|-----------|
| KLF13 | HDAC6     |
| KLF13 | HERPUD1   |
| KLF13 | HEXDC     |
| KLF13 | HID1      |
| KLF13 | HINT2     |
| KLF13 | HIST1H1C  |
| KLF13 | HIST1H2BD |
| KLF13 | H00K2     |
| KLF13 | HPCAL1    |
| KLF13 | HSBP1     |
| KLF13 | HSD17B8   |
| KLF13 | HSPA13    |
| KLF13 | HYOU1     |
| KLF13 | ICAM3     |
| KLF13 | IDH1      |
| KLF13 | IER3IP1   |
| KLF13 | IFI27L2   |
| KLF13 | IFT80     |
| KLF13 | IGFBP4    |
| KLF13 | IGSF8     |
| KLF13 | IKBIP     |
| KLF13 | IL10RA    |
| KLF13 | IL10RB    |
| KLF13 | IMP3      |
| KLF13 | IMPDH1    |
| KLF13 | INPP4A    |
| KLF13 | INSIG2    |
| KLF13 | IQSEC1    |
| KLF13 | IRF1      |
| KLF13 | IRF4      |
| KLF13 | IRS1      |
| KLF13 | ISCU      |
| KLF13 | ISOC2     |
| KLF13 | ITCH      |
| KLF13 | ITFG2     |
| KLF13 | ITGB1     |
| KLF13 | ITGB2     |
| KLF13 | ITM2B     |
| KLF13 | ITM2C     |
| KLF13 | ITPRIP    |
| KLF13 | JUND      |
| KLF13 | KCNK6     |
| KLF13 | KCNN3     |
| KLF13 | KCNN4     |
| KLF13 | KDEL2     |
| KLF13 | KIAA2013  |
| KLF13 | KIF16B    |
| KLF13 | KIFAP3    |
| KLF13 | KIZ       |
| KLF13 | KLF13     |

|       |           |
|-------|-----------|
| KLF13 | KLF2      |
| KLF13 | KLHL14    |
| KLF13 | KLHL36    |
| KLF13 | KRT18     |
| KLF13 | LAMP2     |
| KLF13 | LAP3      |
| KLF13 | LAPTM4A   |
| KLF13 | LAPTM5    |
| KLF13 | LARP1B    |
| KLF13 | LDLRAD4   |
| KLF13 | LEPROT    |
| KLF13 | LGALS1    |
| KLF13 | LGMN      |
| KLF13 | LINC01013 |
| KLF13 | LMAN1     |
| KLF13 | LMAN2     |
| KLF13 | LMBRD1    |
| KLF13 | LMF1      |
| KLF13 | LMF2      |
| KLF13 | LM04      |
| KLF13 | LMTK3     |
| KLF13 | LRP10     |
| KLF13 | LRRC2     |
| KLF13 | LSM1      |
| KLF13 | LSP1      |
| KLF13 | LSR       |
| KLF13 | LTBP3     |
| KLF13 | LTBP4     |
| KLF13 | MACF1     |
| KLF13 | MAGED2    |
| KLF13 | MAN1A1    |
| KLF13 | MAP7D1    |
| KLF13 | MAPK7     |
| KLF13 | MAPKAPK2  |
| KLF13 | MARCH2    |
| KLF13 | MARCH3    |
| KLF13 | MBNL2     |
| KLF13 | MBOAT7    |
| KLF13 | MBTPS1    |
| KLF13 | MCFD2     |
| KLF13 | MECR      |
| KLF13 | MEF2A     |
| KLF13 | MEF2C     |
| KLF13 | METRN     |
| KLF13 | MFN2      |
| KLF13 | MFSD12    |
| KLF13 | MGA       |
| KLF13 | MGAT1     |
| KLF13 | MIAT      |
| KLF13 | MIF4GD    |

|       |         |
|-------|---------|
| KLF13 | MIR22HG |
| KLF13 | MIXL1   |
| KLF13 | MLEC    |
| KLF13 | MORF4L2 |
| KLF13 | MOSPD1  |
| KLF13 | MRPL23  |
| KLF13 | MRPS14  |
| KLF13 | MT1X    |
| KLF13 | MTIF3   |
| KLF13 | MXD4    |
| KLF13 | MYCBP2  |
| KLF13 | MYL4    |
| KLF13 | MYL6    |
| KLF13 | N4BP2L1 |
| KLF13 | NAPA    |
| KLF13 | NCK2    |
| KLF13 | NCOR2   |
| KLF13 | NDFIP1  |
| KLF13 | NDUFA11 |
| KLF13 | NEAT1   |
| KLF13 | NEDD9   |
| KLF13 | NEK8    |
| KLF13 | NMRK1   |
| KLF13 | NPC2    |
| KLF13 | NSUN2   |
| KLF13 | NT5C2   |
| KLF13 | NT5C3A  |
| KLF13 | NT5DC2  |
| KLF13 | NTMT1   |
| KLF13 | NUAK2   |
| KLF13 | NUCB1   |
| KLF13 | NUCB2   |
| KLF13 | NUDT19  |
| KLF13 | NUDT4   |
| KLF13 | OGFOD3  |
| KLF13 | ORAI2   |
| KLF13 | OSTC    |
| KLF13 | OTUD1   |
| KLF13 | OTUD5   |
| KLF13 | OTUD7B  |
| KLF13 | OXR1    |
| KLF13 | P4HB    |
| KLF13 | PAM     |
| KLF13 | PAPSS1  |
| KLF13 | PARP10  |
| KLF13 | PARP4   |
| KLF13 | PBXIP1  |
| KLF13 | PCED1B  |
| KLF13 | PCY0X1  |
| KLF13 | PDE4B   |

|       |          |
|-------|----------|
| KLF13 | PDE4DIP  |
| KLF13 | PDIK1L   |
| KLF13 | PDK1     |
| KLF13 | PDK2     |
| KLF13 | PELO     |
| KLF13 | PEX10    |
| KLF13 | PGM3     |
| KLF13 | PGRMC2   |
| KLF13 | PHF1     |
| KLF13 | PIGT     |
| KLF13 | PIH1D1   |
| KLF13 | PIM2     |
| KLF13 | PINK1    |
| KLF13 | PJA2     |
| KLF13 | PLD3     |
| KLF13 | PLOD3    |
| KLF13 | PLTP     |
| KLF13 | PNOC     |
| KLF13 | PNPLA2   |
| KLF13 | PNRC1    |
| KLF13 | POLRMT   |
| KLF13 | PON2     |
| KLF13 | PPP1R10  |
| KLF13 | PPP2R5B  |
| KLF13 | PRDX2    |
| KLF13 | PRKCSH   |
| KLF13 | PRKD2    |
| KLF13 | PRR5     |
| KLF13 | PRSS16   |
| KLF13 | PSAP     |
| KLF13 | PSENN    |
| KLF13 | PSKH1    |
| KLF13 | PTPN1    |
| KLF13 | PTPN7    |
| KLF13 | PTPRN2   |
| KLF13 | PYM1     |
| KLF13 | QPCT     |
| KLF13 | RAB3GAP1 |
| KLF13 | RAB5A    |
| KLF13 | RABAC1   |
| KLF13 | RAP1A    |
| KLF13 | RAP2B    |
| KLF13 | RASAL3   |
| KLF13 | RBM47    |
| KLF13 | RCBTB2   |
| KLF13 | RELT     |
| KLF13 | RERE     |
| KLF13 | RFXANK   |
| KLF13 | RGS16    |
| KLF13 | RGS2     |

|       |          |
|-------|----------|
| KLF13 | RHBDD1   |
| KLF13 | RILP     |
| KLF13 | RLIM     |
| KLF13 | RNASSET2 |
| KLF13 | RNF185   |
| KLF13 | RNF2     |
| KLF13 | RNF34    |
| KLF13 | RNF4     |
| KLF13 | RPL15    |
| KLF13 | RPL41    |
| KLF13 | RPS19    |
| KLF13 | RPS4X    |
| KLF13 | RRAS     |
| KLF13 | RRBP1    |
| KLF13 | RREB1    |
| KLF13 | RSRP1    |
| KLF13 | RSU1     |
| KLF13 | RTN3     |
| KLF13 | RWDD1    |
| KLF13 | S100A11  |
| KLF13 | SACS     |
| KLF13 | SAR1A    |
| KLF13 | SARAF    |
| KLF13 | SASH3    |
| KLF13 | SAT1     |
| KLF13 | SBDS     |
| KLF13 | SBN02    |
| KLF13 | SCAMP2   |
| KLF13 | SCFD1    |
| KLF13 | SDCCAG8  |
| KLF13 | SDF2     |
| KLF13 | SEC11C   |
| KLF13 | SEC24D   |
| KLF13 | SEC31A   |
| KLF13 | SEC61B   |
| KLF13 | SEC63    |
| KLF13 | SEMA4A   |
| KLF13 | SERINC3  |
| KLF13 | SH2B3    |
| KLF13 | SIL1     |
| KLF13 | SKAP1    |
| KLF13 | SKIL     |
| KLF13 | SLC1A5   |
| KLF13 | SLC20A2  |
| KLF13 | SLC25A28 |
| KLF13 | SLC25A39 |
| KLF13 | SLC25A42 |
| KLF13 | SLC26A6  |
| KLF13 | SLC2A8   |
| KLF13 | SLC30A7  |

|       |            |
|-------|------------|
| KLF13 | SLC35A3    |
| KLF13 | SLC35C1    |
| KLF13 | SLC37A1    |
| KLF13 | SLC38A10   |
| KLF13 | SLC38A2    |
| KLF13 | SLC39A11   |
| KLF13 | SLC39A8    |
| KLF13 | SLC3A2     |
| KLF13 | SMAD5      |
| KLF13 | SMCHD1     |
| KLF13 | SND1       |
| KLF13 | SNX29      |
| KLF13 | S0CS3      |
| KLF13 | SPATS2     |
| KLF13 | SPCS3      |
| KLF13 | SPINT2     |
| KLF13 | SPRED2     |
| KLF13 | SPSB1      |
| KLF13 | SPTY2D1    |
| KLF13 | SRP54      |
| KLF13 | SRP68      |
| KLF13 | SSR1       |
| KLF13 | SSR4       |
| KLF13 | ST6GAL1    |
| KLF13 | ST6GALNAC4 |
| KLF13 | STARD3     |
| KLF13 | STAT2      |
| KLF13 | STAT3      |
| KLF13 | STK17B     |
| KLF13 | STOM       |
| KLF13 | STRN4      |
| KLF13 | STT3A      |
| KLF13 | STT3B      |
| KLF13 | STX5       |
| KLF13 | SUB1       |
| KLF13 | SUC0       |
| KLF13 | SUDS3      |
| KLF13 | SULT1A1    |
| KLF13 | SUPT5H     |
| KLF13 | SYNGR1     |
| KLF13 | TAP1       |
| KLF13 | TARSL2     |
| KLF13 | TBC1D10A   |
| KLF13 | TBC1D10C   |
| KLF13 | TBC1D17    |
| KLF13 | TBL2       |
| KLF13 | TCEAL9     |
| KLF13 | TCF25      |
| KLF13 | TCF4       |
| KLF13 | TCIRG1     |



|       |          |
|-------|----------|
| KLF13 | TDP1     |
| KLF13 | TECR     |
| KLF13 | TFG      |
| KLF13 | TKFC     |
| KLF13 | TLK1     |
| KLF13 | TM9SF2   |
| KLF13 | TMED1    |
| KLF13 | TMED3    |
| KLF13 | TMED7    |
| KLF13 | TMEM115  |
| KLF13 | TMEM161A |
| KLF13 | TMEM205  |
| KLF13 | TMEM256  |
| KLF13 | TMEM263  |
| KLF13 | TMEM50A  |
| KLF13 | TMEM50B  |
| KLF13 | TMEM9    |
| KLF13 | TMX4     |
| KLF13 | TNFRSF1B |
| KLF13 | TNRC6B   |
| KLF13 | TOB1     |
| KLF13 | TOLLIP   |
| KLF13 | TP53INP1 |
| KLF13 | TP73     |
| KLF13 | TPM4     |
| KLF13 | TPST2    |
| KLF13 | TRABD    |
| KLF13 | TRADD    |
| KLF13 | TRAK1    |
| KLF13 | TRAM1    |
| KLF13 | TRAM2    |
| KLF13 | TRAPPC3  |
| KLF13 | TRAPPC6A |
| KLF13 | TRAPPC8  |
| KLF13 | TRIP11   |
| KLF13 | TSC22D3  |
| KLF13 | TSC22D4  |
| KLF13 | TSHZ2    |
| KLF13 | TSP0     |
| KLF13 | TSPYL2   |
| KLF13 | TTC7A    |
| KLF13 | TXNDC5   |
| KLF13 | U2AF1L4  |
| KLF13 | UAP1     |
| KLF13 | UBALD1   |
| KLF13 | UBALD2   |
| KLF13 | UBE2H    |
| KLF13 | UBE2Q1   |
| KLF13 | UBFD1    |
| KLF13 | UBL5     |

|       |              |
|-------|--------------|
| KLF13 | UBN2         |
| KLF13 | UNC13D       |
| KLF13 | UNC93B1      |
| KLF13 | UNKL         |
| KLF13 | UPF1         |
| KLF13 | UQCC2        |
| KLF13 | US01         |
| KLF13 | USP3         |
| KLF13 | USP36        |
| KLF13 | VAMP2        |
| KLF13 | VCP          |
| KLF13 | VDR          |
| KLF13 | VKORC1       |
| KLF13 | VOPP1        |
| KLF13 | VPS25        |
| KLF13 | WBP1L        |
| KLF13 | WIPI1        |
| KLF13 | XIAP         |
| KLF13 | XIST         |
| KLF13 | XKR6         |
| KLF13 | XPOT         |
| KLF13 | YIF1B        |
| KLF13 | YPEL5        |
| KLF13 | ZAP70        |
| KLF13 | ZBTB8A       |
| KLF13 | ZDHHC24      |
| KLF13 | ZFAND1       |
| KLF13 | ZFAND5       |
| KLF13 | ZFAT         |
| KLF13 | ZFPL1        |
| KLF13 | ZHX1-C8orf76 |
| KLF13 | ZNF143       |
| KLF13 | ZNF174       |
| KLF13 | ZNF362       |
| KLF13 | ZNF436       |
| KLF13 | ZNF526       |
| KLF13 | ZNF706       |
| KLF13 | ZNF720       |
| KLF13 | ZNF791       |
| KLF13 | ZNHIT1       |
| KLF2  | AAK1         |
| KLF2  | ABAT         |
| KLF2  | ABCB9        |
| KLF2  | ABHD17A      |
| KLF2  | ABTB1        |
| KLF2  | ACAP1        |
| KLF2  | ACBD3        |
| KLF2  | ACP5         |
| KLF2  | ACSS1        |
| KLF2  | ADAP1        |

|      |          |
|------|----------|
| KLF2 | ADD1     |
| KLF2 | ADD3     |
| KLF2 | AES      |
| KLF2 | AHCYL1   |
| KLF2 | AHNAK    |
| KLF2 | AIDA     |
| KLF2 | AKNA     |
| KLF2 | AKT3     |
| KLF2 | ALDH16A1 |
| KLF2 | ANKRD11  |
| KLF2 | ANKRD27  |
| KLF2 | ANXA2    |
| KLF2 | ANXA4    |
| KLF2 | ANXA6    |
| KLF2 | AP1B1    |
| KLF2 | AP1M1    |
| KLF2 | AP1S2    |
| KLF2 | AP2A1    |
| KLF2 | ARAP2    |
| KLF2 | ARGLU1   |
| KLF2 | ARHGAP15 |
| KLF2 | ARHGAP18 |
| KLF2 | ARHGAP27 |
| KLF2 | ARHGAP30 |
| KLF2 | ARHGAP5  |
| KLF2 | ARHGAP9  |
| KLF2 | ARHGDIB  |
| KLF2 | ARHGEF1  |
| KLF2 | ARHGEF2  |
| KLF2 | ARID3A   |
| KLF2 | ARID5A   |
| KLF2 | ARID5B   |
| KLF2 | ARL4C    |
| KLF2 | ARL4D    |
| KLF2 | ARL6IP5  |
| KLF2 | ARRB2    |
| KLF2 | ASCL2    |
| KLF2 | ATP10D   |
| KLF2 | ATP11C   |
| KLF2 | ATP13A3  |
| KLF2 | BAK1     |
| KLF2 | BBX      |
| KLF2 | BCL11A   |
| KLF2 | BCL9L    |
| KLF2 | BIN1     |
| KLF2 | BLCAP    |
| KLF2 | BRD2     |
| KLF2 | BRD3     |
| KLF2 | BSDC1    |
| KLF2 | BTG1     |

|      |          |
|------|----------|
| KLF2 | BTK      |
| KLF2 | C11orf24 |
| KLF2 | C12orf66 |
| KLF2 | C16orf74 |
| KLF2 | C4orf33  |
| KLF2 | C5orf34  |
| KLF2 | CALCOC01 |
| KLF2 | CALCOC02 |
| KLF2 | CALHM2   |
| KLF2 | CALM1    |
| KLF2 | CAPG     |
| KLF2 | CAPN1    |
| KLF2 | CAPN12   |
| KLF2 | CAPNS1   |
| KLF2 | CARD19   |
| KLF2 | CAST     |
| KLF2 | CAT      |
| KLF2 | CBR3     |
| KLF2 | CCNA1    |
| KLF2 | CCSER2   |
| KLF2 | CD44     |
| KLF2 | CD47     |
| KLF2 | CD53     |
| KLF2 | CD55     |
| KLF2 | CDC14B   |
| KLF2 | CDC42EP3 |
| KLF2 | CDC42SE1 |
| KLF2 | CDKN2A   |
| KLF2 | CDKN2D   |
| KLF2 | CELF2    |
| KLF2 | CEP44    |
| KLF2 | CHD7     |
| KLF2 | CHST14   |
| KLF2 | CLIC1    |
| KLF2 | CNN2     |
| KLF2 | COR01C   |
| KLF2 | COTL1    |
| KLF2 | CPNE5    |
| KLF2 | CRIP1    |
| KLF2 | CRYZL1   |
| KLF2 | CSRP1    |
| KLF2 | CTNND1   |
| KLF2 | CTR9     |
| KLF2 | CTSB     |
| KLF2 | CTSZ     |
| KLF2 | CXCR3    |
| KLF2 | CXCR4    |
| KLF2 | CXXC5    |
| KLF2 | CYTH4    |
| KLF2 | CYTIP    |

|      |         |
|------|---------|
| KLF2 | DBP     |
| KLF2 | DDAH2   |
| KLF2 | DDX5    |
| KLF2 | DENND3  |
| KLF2 | DHRS9   |
| KLF2 | DIAPH2  |
| KLF2 | DLST    |
| KLF2 | DMD     |
| KLF2 | DOK7    |
| KLF2 | DPEP2   |
| KLF2 | DPY19L3 |
| KLF2 | DRAM2   |
| KLF2 | DUSP1   |
| KLF2 | DYM     |
| KLF2 | ECEL1   |
| KLF2 | EEA1    |
| KLF2 | EEF1A1  |
| KLF2 | EEF1D   |
| KLF2 | EEF1E1  |
| KLF2 | EFCAB2  |
| KLF2 | EIF5A   |
| KLF2 | EML4    |
| KLF2 | EMP3    |
| KLF2 | EP300   |
| KLF2 | EPB41   |
| KLF2 | EPHB6   |
| KLF2 | ERP29   |
| KLF2 | ESYT1   |
| KLF2 | ETFA    |
| KLF2 | ETS1    |
| KLF2 | EXT1    |
| KLF2 | FAM117B |
| KLF2 | FAM177B |
| KLF2 | FAM43A  |
| KLF2 | FAM53B  |
| KLF2 | FAM69B  |
| KLF2 | FANCB   |
| KLF2 | FBRSL1  |
| KLF2 | FBXL3   |
| KLF2 | FBX032  |
| KLF2 | FCGR2B  |
| KLF2 | FCMR    |
| KLF2 | FGD3    |
| KLF2 | FGR     |
| KLF2 | FHOD1   |
| KLF2 | FIG4    |
| KLF2 | FLI1    |
| KLF2 | FLNA    |
| KLF2 | FMNL1   |
| KLF2 | FOXP1   |

|      |           |
|------|-----------|
| KLF2 | FTH1      |
| KLF2 | FXYD5     |
| KLF2 | GABARAPL2 |
| KLF2 | GALNT2    |
| KLF2 | GEMIN6    |
| KLF2 | GMFG      |
| KLF2 | GMIP      |
| KLF2 | GNAI2     |
| KLF2 | GOLGA7    |
| KLF2 | GPR108    |
| KLF2 | GPR146    |
| KLF2 | GPSM3     |
| KLF2 | GRAP2     |
| KLF2 | GRK6      |
| KLF2 | GSDMD     |
| KLF2 | GSN       |
| KLF2 | GUCD1     |
| KLF2 | HEBP1     |
| KLF2 | HHEX      |
| KLF2 | HIP1R     |
| KLF2 | HIPK3     |
| KLF2 | H0XB4     |
| KLF2 | H0XB7     |
| KLF2 | HPCAL1    |
| KLF2 | HSD17B11  |
| KLF2 | HVCN1     |
| KLF2 | ID3       |
| KLF2 | IDH1      |
| KLF2 | IER2      |
| KLF2 | IFT57     |
| KLF2 | IGFBP4    |
| KLF2 | IGSF8     |
| KLF2 | IL10RA    |
| KLF2 | IL16      |
| KLF2 | ING2      |
| KLF2 | IQGAP1    |
| KLF2 | IQSEC1    |
| KLF2 | IRF1      |
| KLF2 | IRF2BP1   |
| KLF2 | IRF2BP2   |
| KLF2 | IRF9      |
| KLF2 | ITCH      |
| KLF2 | ITGB1     |
| KLF2 | ITGB7     |
| KLF2 | ITM2B     |
| KLF2 | ITPR1     |
| KLF2 | ITPR3     |
| KLF2 | IVNS1ABP  |
| KLF2 | JAK1      |
| KLF2 | JUN       |

|      |           |
|------|-----------|
| KLF2 | JUNB      |
| KLF2 | KCNMA1    |
| KLF2 | KCNN4     |
| KLF2 | KDM2A     |
| KLF2 | KDM7A     |
| KLF2 | KIAA1551  |
| KLF2 | KLF13     |
| KLF2 | KLF2      |
| KLF2 | KLF3      |
| KLF2 | KLF6      |
| KLF2 | KLHL14    |
| KLF2 | KMT2E     |
| KLF2 | KRI1      |
| KLF2 | KYNU      |
| KLF2 | LACTB     |
| KLF2 | LAPTM4A   |
| KLF2 | LAPTM5    |
| KLF2 | LBH       |
| KLF2 | LCP1      |
| KLF2 | LGALS1    |
| KLF2 | LGALS3    |
| KLF2 | LGALS9    |
| KLF2 | LIMK2     |
| KLF2 | LINC00926 |
| KLF2 | LINC01013 |
| KLF2 | LINC01588 |
| KLF2 | LITAF     |
| KLF2 | LMBRD1    |
| KLF2 | LMNB2     |
| KLF2 | LRCH4     |
| KLF2 | LRRC28    |
| KLF2 | LSP1      |
| KLF2 | LST1      |
| KLF2 | LTA4H     |
| KLF2 | LTB       |
| KLF2 | LY6E      |
| KLF2 | MAP7D1    |
| KLF2 | MAPK7     |
| KLF2 | MARCH3    |
| KLF2 | MARCH9    |
| KLF2 | MAX       |
| KLF2 | MBP       |
| KLF2 | MEF2C     |
| KLF2 | MELK      |
| KLF2 | MET       |
| KLF2 | MIEF1     |
| KLF2 | MORC3     |
| KLF2 | MOSPD1    |
| KLF2 | MSANTD4   |
| KLF2 | MSN       |

|      |             |
|------|-------------|
| KLF2 | MTFR2       |
| KLF2 | MTPN        |
| KLF2 | MXI1        |
| KLF2 | MYH9        |
| KLF2 | MYL12A      |
| KLF2 | MY01F       |
| KLF2 | MY01G       |
| KLF2 | MYZAP       |
| KLF2 | N4BP3       |
| KLF2 | NCAPH       |
| KLF2 | NCR3        |
| KLF2 | NEAT1       |
| KLF2 | NPC2        |
| KLF2 | NUMB        |
| KLF2 | NUTF2       |
| KLF2 | NXT2        |
| KLF2 | OPN3        |
| KLF2 | OPTN        |
| KLF2 | ORAI2       |
| KLF2 | ORA0V1      |
| KLF2 | OSBPL10     |
| KLF2 | OSBPL10-AS1 |
| KLF2 | OXR1        |
| KLF2 | PAC SIN2    |
| KLF2 | PAICS       |
| KLF2 | PARP10      |
| KLF2 | PATL2       |
| KLF2 | PBXIP1      |
| KLF2 | PCBP4       |
| KLF2 | PDLIM1      |
| KLF2 | PFN1        |
| KLF2 | PGM1        |
| KLF2 | PGM2L1      |
| KLF2 | PHF19       |
| KLF2 | PHF21A      |
| KLF2 | PITPNA      |
| KLF2 | PKM         |
| KLF2 | PKMYT1      |
| KLF2 | PLAC8       |
| KLF2 | PLEC        |
| KLF2 | PLEKHA1     |
| KLF2 | PLP2        |
| KLF2 | PNISR       |
| KLF2 | PNKD        |
| KLF2 | PNRC1       |
| KLF2 | PPA2        |
| KLF2 | PPM1K       |
| KLF2 | PPM1M       |
| KLF2 | PPP1R14A    |
| KLF2 | PPP1R18     |



|      |         |
|------|---------|
| KLF2 | PPP6R3  |
| KLF2 | PREX1   |
| KLF2 | PRKCB   |
| KLF2 | PRMT2   |
| KLF2 | PRR13   |
| KLF2 | PRR5    |
| KLF2 | PSAP    |
| KLF2 | PSMB10  |
| KLF2 | PSTPIP1 |
| KLF2 | PTPN1   |
| KLF2 | PTPN6   |
| KLF2 | PTPRC   |
| KLF2 | PYCARD  |
| KLF2 | R3HDM4  |
| KLF2 | RAB29   |
| KLF2 | RAB2B   |
| KLF2 | RAB33A  |
| KLF2 | RAB37   |
| KLF2 | RAB5B   |
| KLF2 | RALB    |
| KLF2 | RALGPS2 |
| KLF2 | RAP2B   |
| KLF2 | RASA3   |
| KLF2 | RASGRP1 |
| KLF2 | RASGRP2 |
| KLF2 | RASSF5  |
| KLF2 | RBM12   |
| KLF2 | RCSD1   |
| KLF2 | RFTN1   |
| KLF2 | RGS14   |
| KLF2 | RGS3    |
| KLF2 | RHBDF2  |
| KLF2 | RHOC    |
| KLF2 | RHOQ    |
| KLF2 | RIT1    |
| KLF2 | RNASET2 |
| KLF2 | RNF141  |
| KLF2 | RNH1    |
| KLF2 | RPL29   |
| KLF2 | RPL32   |
| KLF2 | RPLP2   |
| KLF2 | RPS12   |
| KLF2 | RPS21   |
| KLF2 | RSRP1   |
| KLF2 | RTKN    |
| KLF2 | RTN4    |
| KLF2 | RYBP    |
| KLF2 | S100A10 |
| KLF2 | S100A11 |
| KLF2 | S100A4  |

|      |          |
|------|----------|
| KLF2 | S1PR4    |
| KLF2 | SARAF    |
| KLF2 | SATB1    |
| KLF2 | SEC22C   |
| KLF2 | SEMA4B   |
| KLF2 | SESTD1   |
| KLF2 | SETD3    |
| KLF2 | SH3BGRL3 |
| KLF2 | SH3PXD2A |
| KLF2 | SIAH1    |
| KLF2 | SIDT2    |
| KLF2 | SIGIRR   |
| KLF2 | SIGMAR1  |
| KLF2 | SIMC1    |
| KLF2 | SIPA1    |
| KLF2 | SIPA1L1  |
| KLF2 | SLC12A9  |
| KLF2 | SLC25A12 |
| KLF2 | SLC25A28 |
| KLF2 | SLC25A29 |
| KLF2 | SLC2A6   |
| KLF2 | SLC38A2  |
| KLF2 | SLC4A7   |
| KLF2 | SLC7A7   |
| KLF2 | SLC9A3R1 |
| KLF2 | SMIM14   |
| KLF2 | SMIM20   |
| KLF2 | SNAI3    |
| KLF2 | SNRNP48  |
| KLF2 | SNX10    |
| KLF2 | SNX2     |
| KLF2 | SNX22    |
| KLF2 | SNX3     |
| KLF2 | S0CS7    |
| KLF2 | S0WAHD   |
| KLF2 | SPACA9   |
| KLF2 | SPIB     |
| KLF2 | SPINT1   |
| KLF2 | SPN      |
| KLF2 | SPOCK2   |
| KLF2 | SPPL2B   |
| KLF2 | SRGAP2B  |
| KLF2 | SRPK2    |
| KLF2 | ST3GAL5  |
| KLF2 | STAMBPL1 |
| KLF2 | STK26    |
| KLF2 | STRN     |
| KLF2 | STX7     |
| KLF2 | SUB1     |
| KLF2 | SULT1A1  |

|      |           |
|------|-----------|
| KLF2 | SUN2      |
| KLF2 | SYT11     |
| KLF2 | TAGLN     |
| KLF2 | TAGLN2    |
| KLF2 | TARSL2    |
| KLF2 | TBC1D10C  |
| KLF2 | TBCC      |
| KLF2 | TBXA2R    |
| KLF2 | TCF4      |
| KLF2 | TCP11L2   |
| KLF2 | TGFB1     |
| KLF2 | TMBIM1    |
| KLF2 | TMEM154   |
| KLF2 | TMEM156   |
| KLF2 | TMEM218   |
| KLF2 | TMEM223   |
| KLF2 | TMEM256   |
| KLF2 | TMEM41B   |
| KLF2 | TMSB10    |
| KLF2 | TMSB4X    |
| KLF2 | TMX4      |
| KLF2 | TNFAIP8L2 |
| KLF2 | TNFRSF13C |
| KLF2 | TNFRSF1B  |
| KLF2 | TNFSF10   |
| KLF2 | TNFSF12   |
| KLF2 | TNRC6B    |
| KLF2 | TP53I11   |
| KLF2 | TRABD     |
| KLF2 | TRAF3IP3  |
| KLF2 | TRAK2     |
| KLF2 | TRIB2     |
| KLF2 | TRIB3     |
| KLF2 | TRIM39    |
| KLF2 | TRIM41    |
| KLF2 | TRIM8     |
| KLF2 | TRPV2     |
| KLF2 | TSC22D3   |
| KLF2 | TSC22D4   |
| KLF2 | TSP0      |
| KLF2 | TST       |
| KLF2 | TTC12     |
| KLF2 | TUBA1A    |
| KLF2 | TXNIP     |
| KLF2 | U2AF1L4   |
| KLF2 | UCKL1     |
| KLF2 | UCP2      |
| KLF2 | USP8      |
| KLF2 | UTRN      |
| KLF2 | VAMP2     |

|      |                |
|------|----------------|
| KLF2 | VAMP5          |
| KLF2 | VIM            |
| KLF2 | WASF2          |
| KLF2 | WDFY2          |
| KLF2 | WDFY4          |
| KLF2 | XIST           |
| KLF2 | YPEL5          |
| KLF2 | YWHAZ          |
| KLF2 | ZBTB20         |
| KLF2 | ZBTB7A         |
| KLF2 | ZDHHC19        |
| KLF2 | ZDHHC21        |
| KLF2 | ZEB2           |
| KLF2 | ZFP36          |
| KLF2 | ZFP36L2        |
| KLF2 | ZNF277         |
| KLF2 | ZNF296         |
| KLF2 | ZNF7           |
| KLF2 | ZNF766         |
| KLF2 | ZNF816-ZNF321P |
| KLF3 | ABTB1          |
| KLF3 | ARL4A          |
| KLF3 | ASCC1          |
| KLF3 | C12orf42       |
| KLF3 | C17orf67       |
| KLF3 | C9orf72        |
| KLF3 | CENPC          |
| KLF3 | CSPP1          |
| KLF3 | CTDSP2         |
| KLF3 | CXCR4          |
| KLF3 | DDHD2          |
| KLF3 | DYRK2          |
| KLF3 | EPB41          |
| KLF3 | FAAP100        |
| KLF3 | ID3            |
| KLF3 | IGFBP4         |
| KLF3 | ING2           |
| KLF3 | IRF2           |
| KLF3 | JUNB           |
| KLF3 | KLF2           |
| KLF3 | KLF3           |
| KLF3 | KLF7           |
| KLF3 | LBH            |
| KLF3 | MBP            |
| KLF3 | MLLT10         |
| KLF3 | PIAS1          |
| KLF3 | PLAC8          |
| KLF3 | PLEKHA1        |
| KLF3 | PPP1R14A       |
| KLF3 | PRKCB          |

|      |          |
|------|----------|
| KLF3 | RAF1     |
| KLF3 | RFX2     |
| KLF3 | SARAF    |
| KLF3 | SIAH1    |
| KLF3 | SIRPA    |
| KLF3 | STRN     |
| KLF3 | TAF3     |
| KLF3 | TARSL2   |
| KLF3 | TMEM41A  |
| KLF3 | TMSB10   |
| KLF3 | TSPAN13  |
| KLF3 | TUBGCP2  |
| KLF3 | VPS13C   |
| KLF3 | ZDHC13   |
| KLF3 | ZEB1     |
| KLF3 | ZFP36L2  |
| KLF4 | BAIAP2L1 |
| KLF4 | BCL10    |
| KLF4 | BRI3BP   |
| KLF4 | CDK17    |
| KLF4 | DNPEP    |
| KLF4 | DUSP1    |
| KLF4 | ER01A    |
| KLF4 | GPR89A   |
| KLF4 | GPR89B   |
| KLF4 | H00K2    |
| KLF4 | KLF4     |
| KLF4 | MTMR4    |
| KLF4 | PRDM1    |
| KLF4 | RAB9A    |
| KLF4 | SMYD2    |
| KLF4 | VDR      |
| KLF6 | ABTB2    |
| KLF6 | ACAP1    |
| KLF6 | ACP5     |
| KLF6 | ACTL10   |
| KLF6 | ADD1     |
| KLF6 | ADGRE5   |
| KLF6 | AGAP6    |
| KLF6 | AGPAT2   |
| KLF6 | AHNAK    |
| KLF6 | AIDA     |
| KLF6 | AKAP12   |
| KLF6 | ANKRD12  |
| KLF6 | ANTXR2   |
| KLF6 | ANXA2    |
| KLF6 | ANXA4    |
| KLF6 | AP1G1    |
| KLF6 | AP5S1    |
| KLF6 | ARF6     |

|      |          |
|------|----------|
| KLF6 | ARHGAP33 |
| KLF6 | ARID2    |
| KLF6 | ARID5A   |
| KLF6 | ARID5B   |
| KLF6 | ARL4A    |
| KLF6 | ARL6IP5  |
| KLF6 | ARRDC2   |
| KLF6 | ASB6     |
| KLF6 | ATXN1    |
| KLF6 | BCAS1    |
| KLF6 | C12orf66 |
| KLF6 | CAPG     |
| KLF6 | CAPN2    |
| KLF6 | CARD19   |
| KLF6 | CAST     |
| KLF6 | CBX6     |
| KLF6 | CBX7     |
| KLF6 | CCR7     |
| KLF6 | CCSER2   |
| KLF6 | CD44     |
| KLF6 | CD47     |
| KLF6 | CD63     |
| KLF6 | CELF2    |
| KLF6 | CLIC1    |
| KLF6 | CLIP1    |
| KLF6 | CLK4     |
| KLF6 | CLMN     |
| KLF6 | CREBRF   |
| KLF6 | CXorf40B |
| KLF6 | CYLD     |
| KLF6 | CYSTM1   |
| KLF6 | CYTH1    |
| KLF6 | CYTH2    |
| KLF6 | CYTIP    |
| KLF6 | DDAH2    |
| KLF6 | DGAT1    |
| KLF6 | DPF3     |
| KLF6 | DUSP1    |
| KLF6 | DYNLT3   |
| KLF6 | EEF1A1   |
| KLF6 | EMP3     |
| KLF6 | EPHB6    |
| KLF6 | ESYT1    |
| KLF6 | EVI2A    |
| KLF6 | FBXL3    |
| KLF6 | FGD2     |
| KLF6 | FGR      |
| KLF6 | FLNA     |
| KLF6 | FMNL1    |
| KLF6 | FMNL2    |

|      |           |
|------|-----------|
| KLF6 | FOSB      |
| KLF6 | FOSL1     |
| KLF6 | FSD1L     |
| KLF6 | GPRC5C    |
| KLF6 | HERC1     |
| KLF6 | HIPK3     |
| KLF6 | HYAL2     |
| KLF6 | IDS       |
| KLF6 | IFNGR1    |
| KLF6 | IL15      |
| KLF6 | IL2RG     |
| KLF6 | IL6       |
| KLF6 | JUN       |
| KLF6 | KDEL3     |
| KLF6 | KDM6A     |
| KLF6 | KIAA1551  |
| KLF6 | KLF6      |
| KLF6 | KLF7      |
| KLF6 | KLHL26    |
| KLF6 | KLK1      |
| KLF6 | KYNU      |
| KLF6 | LACTB     |
| KLF6 | LAMB1     |
| KLF6 | LDLRAD4   |
| KLF6 | LGALS3    |
| KLF6 | LINC00649 |
| KLF6 | LMNA      |
| KLF6 | LPAR5     |
| KLF6 | LRP8      |
| KLF6 | LRRC23    |
| KLF6 | LRRFIP1   |
| KLF6 | MACROD2   |
| KLF6 | MAGED2    |
| KLF6 | MAP1B     |
| KLF6 | MAP4      |
| KLF6 | MBP       |
| KLF6 | MFSD6     |
| KLF6 | MGST3     |
| KLF6 | MIATNB    |
| KLF6 | MTMR4     |
| KLF6 | MTRNR2L1  |
| KLF6 | MVP       |
| KLF6 | MYADM     |
| KLF6 | MYH9      |
| KLF6 | MYO1F     |
| KLF6 | NPC1      |
| KLF6 | NQO2      |
| KLF6 | ODF2L     |
| KLF6 | OPTN      |
| KLF6 | PCK2      |

|      |            |
|------|------------|
| KLF6 | PHF1       |
| KLF6 | PKIG       |
| KLF6 | PLEC       |
| KLF6 | PLP2       |
| KLF6 | PNRC1      |
| KLF6 | PPP1R15A   |
| KLF6 | PPP3CA     |
| KLF6 | PRKAG2     |
| KLF6 | PTMS       |
| KLF6 | PTPN12     |
| KLF6 | PWWP2B     |
| KLF6 | RAB13      |
| KLF6 | RALB       |
| KLF6 | RALGPS2    |
| KLF6 | RARA       |
| KLF6 | RCAN3      |
| KLF6 | RDX        |
| KLF6 | REEP4      |
| KLF6 | RHOC       |
| KLF6 | RHOF       |
| KLF6 | RPL34      |
| KLF6 | RTN4       |
| KLF6 | RUNX3      |
| KLF6 | S100A11    |
| KLF6 | S100A2     |
| KLF6 | S100A4     |
| KLF6 | SESN3      |
| KLF6 | SESTD1     |
| KLF6 | SETX       |
| KLF6 | SH3BGRL3   |
| KLF6 | SIGIRR     |
| KLF6 | SLC25A42   |
| KLF6 | SLC2A3     |
| KLF6 | SLC2A6     |
| KLF6 | SLC39A13   |
| KLF6 | SLC4A7     |
| KLF6 | SLC9A3R2   |
| KLF6 | SMAD3      |
| KLF6 | SNX2       |
| KLF6 | SPHK1      |
| KLF6 | SPTBN1     |
| KLF6 | SRPK2      |
| KLF6 | ST6GALNAC3 |
| KLF6 | STK38      |
| KLF6 | SUN2       |
| KLF6 | TAGLN2     |
| KLF6 | TBCE       |
| KLF6 | TCAF1      |
| KLF6 | TIMP1      |
| KLF6 | TIPARP     |



|      |          |
|------|----------|
| KLF6 | TMBIM1   |
| KLF6 | TNIP2    |
| KLF6 | TNRC6B   |
| KLF6 | TOX2     |
| KLF6 | TRAK1    |
| KLF6 | TRIQK    |
| KLF6 | TSC22D3  |
| KLF6 | TSPAN17  |
| KLF6 | TUBA1A   |
| KLF6 | UBE4B    |
| KLF6 | ULK4     |
| KLF6 | UNC119   |
| KLF6 | VCL      |
| KLF6 | VIM      |
| KLF6 | VRK2     |
| KLF6 | WASF1    |
| KLF6 | WSB1     |
| KLF6 | ZBED4    |
| KLF6 | ZBTB7A   |
| KLF6 | ZEB2     |
| KLF6 | ZFP36    |
| KLF6 | ZNF267   |
| KLF6 | ZNF524   |
| KLF6 | ZNF703   |
| KLF6 | ZSWIM6   |
| KLF6 | ZXDB     |
| KLF7 | ACP5     |
| KLF7 | AHNAK    |
| KLF7 | ATG101   |
| KLF7 | BCL3     |
| KLF7 | C16orf74 |
| KLF7 | CAST     |
| KLF7 | CCND2    |
| KLF7 | CEP164   |
| KLF7 | CERS5    |
| KLF7 | CHD2     |
| KLF7 | DYRK1A   |
| KLF7 | EMP3     |
| KLF7 | FBRSL1   |
| KLF7 | GNG4     |
| KLF7 | GPATCH2L |
| KLF7 | IDH1     |
| KLF7 | IL6      |
| KLF7 | ITCH     |
| KLF7 | JUNB     |
| KLF7 | KANSL1   |
| KLF7 | KLF3     |
| KLF7 | KLF7     |
| KLF7 | KLF8     |
| KLF7 | LTBP1    |

|      |          |
|------|----------|
| KLF7 | MEF2C    |
| KLF7 | METTTL2A |
| KLF7 | MICU1    |
| KLF7 | MRRF     |
| KLF7 | MTSS1    |
| KLF7 | NTAN1    |
| KLF7 | PURB     |
| KLF7 | RAB5B    |
| KLF7 | RALGAPA1 |
| KLF7 | RIMKLB   |
| KLF7 | SH3BP2   |
| KLF7 | SIN3A    |
| KLF7 | SLC44A2  |
| KLF7 | SPSB1    |
| KLF7 | SUN2     |
| KLF7 | TBCE     |
| KLF7 | TGIF1    |
| KLF7 | TMEM256  |
| KLF7 | TP53BP2  |
| KLF8 | ABTB1    |
| KLF8 | BCKDHB   |
| KLF8 | C15orf62 |
| KLF8 | CENPC    |
| KLF8 | CSNK1G1  |
| KLF8 | EGLN2    |
| KLF8 | GOLGA7   |
| KLF8 | GRAP2    |
| KLF8 | IDH1     |
| KLF8 | IGFBP4   |
| KLF8 | ITGB7    |
| KLF8 | KLF7     |
| KLF8 | KLF8     |
| KLF8 | MSC      |
| KLF8 | OSBP     |
| KLF8 | PNPLA8   |
| KLF8 | REX02    |
| KLF8 | RIC1     |
| KLF8 | RNASET2  |
| KLF8 | RPS6KA2  |
| KLF8 | SLC15A3  |
| KLF8 | SLC16A3  |
| KLF8 | SLC2A3   |
| KLF8 | SRGAP2C  |
| KLF8 | SRPK2    |
| KLF8 | TASP1    |
| KLF8 | TXNIP    |
| KLF8 | ZEB2     |
| MAFB | AFF4     |
| MAFB | AIG1     |
| MAFB | ANAPC10  |

|      |           |
|------|-----------|
| MAFB | BCL2L11   |
| MAFB | BRD2      |
| MAFB | C12orf42  |
| MAFB | C1GALT1   |
| MAFB | C2orf49   |
| MAFB | CASP10    |
| MAFB | CDC34     |
| MAFB | CLK4      |
| MAFB | CTNNA1    |
| MAFB | DENND1C   |
| MAFB | ESYT2     |
| MAFB | FAM53C    |
| MAFB | HIST1H4E  |
| MAFB | HSPA2     |
| MAFB | IFRD1     |
| MAFB | IL12RB1   |
| MAFB | JMY       |
| MAFB | JUN       |
| MAFB | JUND      |
| MAFB | LM04      |
| MAFB | MAFB      |
| MAFB | NFX1      |
| MAFB | NUP153    |
| MAFB | NUP214    |
| MAFB | PABPC1    |
| MAFB | PAK1      |
| MAFB | PHC3      |
| MAFB | PRKACB    |
| MAFB | RAB30     |
| MAFB | RAB40B    |
| MAFB | RGS2      |
| MAFB | RPS29     |
| MAFB | SGK1      |
| MAFB | TPM1      |
| MAFB | TSPYL2    |
| MAFB | UBE4A     |
| MAFB | UBN2      |
| MAFB | ZBTB21    |
| MAFB | ZBTB8A    |
| MAFB | ZDHC8     |
| MAFB | ZNF507    |
| MAFB | ZNF91     |
| MAFF | GALM      |
| MAFF | HPCAL1    |
| MAFF | LINC00623 |
| MAFF | MAFF      |
| MAFF | MARCH3    |
| MAFF | MICAL3    |
| MAFF | RUFY3     |
| MAFF | SMG7      |

|      |          |
|------|----------|
| MAFF | TRIM36   |
| MAFF | VPS11    |
| MAFG | EEDP1    |
| MAFG | FOXN2    |
| MAFG | MAFG     |
| MAFG | MAST2    |
| MAFG | RHBDD3   |
| MAFG | RNF19A   |
| MAFG | RREB1    |
| MAFG | SGK3     |
| MAFG | SKAP1    |
| MAFG | SNX11    |
| MAFG | SQSTM1   |
| MAFG | TRAF1    |
| MAFG | USP44    |
| MAFG | ZBTB20   |
| MAFK | MYC      |
| MAFK | RPS6KB1  |
| MAFK | SLC04A1  |
| MAFK | SPRY1    |
| MAFK | ZDHHC5   |
| MAX  | AACS     |
| MAX  | ABCF3    |
| MAX  | ABHD5    |
| MAX  | ACBD4    |
| MAX  | AC01     |
| MAX  | ACTR1B   |
| MAX  | ACTR6    |
| MAX  | ADCK5    |
| MAX  | ADD1     |
| MAX  | ADK      |
| MAX  | ADSS     |
| MAX  | AHI1     |
| MAX  | AIDA     |
| MAX  | AK9      |
| MAX  | AKAP9    |
| MAX  | ALG3     |
| MAX  | ALG8     |
| MAX  | ALKBH1   |
| MAX  | ALKBH5   |
| MAX  | ANKRD10  |
| MAX  | ANXA2    |
| MAX  | AP2A1    |
| MAX  | AP4E1    |
| MAX  | APH1B    |
| MAX  | ARAP2    |
| MAX  | AREG     |
| MAX  | ARFGAP1  |
| MAX  | ARFIP1   |
| MAX  | ARHGAP25 |

|     |          |
|-----|----------|
| MAX | ARHGDIB  |
| MAX | ARHGEF1  |
| MAX | ARHGEF12 |
| MAX | ARHGEF2  |
| MAX | ARID4B   |
| MAX | ARMCX6   |
| MAX | ARPC5    |
| MAX | ARSK     |
| MAX | ATAD3A   |
| MAX | ATAD3B   |
| MAX | ATG12    |
| MAX | ATG13    |
| MAX | ATG5     |
| MAX | ATXN1    |
| MAX | ATXN7L3B |
| MAX | B2M      |
| MAX | BBIP1    |
| MAX | BBX      |
| MAX | BCAP29   |
| MAX | BCAP31   |
| MAX | BCL2L11  |
| MAX | BEX4     |
| MAX | BICD2    |
| MAX | BLOC1S2  |
| MAX | BNIP2    |
| MAX | BORCS7   |
| MAX | BRD2     |
| MAX | BRD9     |
| MAX | BROX     |
| MAX | BTBD7    |
| MAX | BTF3     |
| MAX | BTK      |
| MAX | C12orf10 |
| MAX | C16orf74 |
| MAX | C19orf70 |
| MAX | C1orf174 |
| MAX | C2orf42  |
| MAX | CAMK1D   |
| MAX | CAP1     |
| MAX | CAPZA2   |
| MAX | CBFB     |
| MAX | CCDC86   |
| MAX | CCNA1    |
| MAX | CCNL2    |
| MAX | CCT4     |
| MAX | CCT7     |
| MAX | CD44     |
| MAX | CD47     |
| MAX | CD53     |
| MAX | CD59     |

|     |          |
|-----|----------|
| MAX | CDC16    |
| MAX | CDC23    |
| MAX | CDC27    |
| MAX | CDC42EP3 |
| MAX | CDC73    |
| MAX | CDIP1    |
| MAX | CDK5RAP3 |
| MAX | CELF1    |
| MAX | CELF2    |
| MAX | CENPL    |
| MAX | CFLAR    |
| MAX | CHCHD5   |
| MAX | CHD1     |
| MAX | CHFR     |
| MAX | CHMP3    |
| MAX | CHMP4A   |
| MAX | CIB1     |
| MAX | CIB2     |
| MAX | CIR1     |
| MAX | CLDN14   |
| MAX | CLDN23   |
| MAX | CLEC16A  |
| MAX | CLK1     |
| MAX | CLNS1A   |
| MAX | CNDP2    |
| MAX | CNKSR1   |
| MAX | CN0T4    |
| MAX | CN0T7    |
| MAX | CNPPD1   |
| MAX | CNPY3    |
| MAX | COA6     |
| MAX | COG4     |
| MAX | COG8     |
| MAX | COMMD6   |
| MAX | COMMD9   |
| MAX | COPA     |
| MAX | COR01C   |
| MAX | COX20    |
| MAX | COX4I1   |
| MAX | COX7A2L  |
| MAX | COX7C    |
| MAX | CREB1    |
| MAX | CREB3L2  |
| MAX | CTDNEP1  |
| MAX | CTDSP2   |
| MAX | CTU1     |
| MAX | CXXC5    |
| MAX | CYB5A    |
| MAX | DALRD3   |
| MAX | DCAF16   |

|     |         |
|-----|---------|
| MAX | DDX5    |
| MAX | DDX50   |
| MAX | DHCR7   |
| MAX | DHRS7B  |
| MAX | DMTF1   |
| MAX | DNAJC11 |
| MAX | DNAJC7  |
| MAX | DNMBP   |
| MAX | DPM1    |
| MAX | DPP8    |
| MAX | DUSP1   |
| MAX | DUSP6   |
| MAX | DVL2    |
| MAX | DYNC1I2 |
| MAX | EAPP    |
| MAX | EBAG9   |
| MAX | EEF1A1  |
| MAX | EEF1B2  |
| MAX | EEF1D   |
| MAX | EFCAB7  |
| MAX | EGR2    |
| MAX | EIF1AX  |
| MAX | EIF3E   |
| MAX | EIF3H   |
| MAX | EIF4H   |
| MAX | ELK4    |
| MAX | ELM01   |
| MAX | ELP3    |
| MAX | EMP3    |
| MAX | ERLIN1  |
| MAX | ETF1    |
| MAX | ETS2    |
| MAX | EVC2    |
| MAX | EXD2    |
| MAX | EXOC2   |
| MAX | FADS3   |
| MAX | FAM122A |
| MAX | FAM174A |
| MAX | FAM192A |
| MAX | FAM193B |
| MAX | FASTKD5 |
| MAX | FAU     |
| MAX | FBXL17  |
| MAX | FBX022  |
| MAX | FBX03   |
| MAX | FBX07   |
| MAX | FBXW2   |
| MAX | FBXW5   |
| MAX | FCGR2B  |
| MAX | FGGY    |

|     |          |
|-----|----------|
| MAX | FKBP4    |
| MAX | FNIP1    |
| MAX | FOSL1    |
| MAX | FUCA1    |
| MAX | FXR2     |
| MAX | GANAB    |
| MAX | GATAD2B  |
| MAX | GBA2     |
| MAX | GBF1     |
| MAX | GDAP2    |
| MAX | GGA1     |
| MAX | GGT7     |
| MAX | GLIPR1   |
| MAX | GLOD4    |
| MAX | GMPR     |
| MAX | GNB1L    |
| MAX | GNGT2    |
| MAX | GNL2     |
| MAX | GOLGA7   |
| MAX | GOSR1    |
| MAX | GPATCH11 |
| MAX | GPBP1    |
| MAX | GPN2     |
| MAX | GPR180   |
| MAX | GPSM2    |
| MAX | GPSM3    |
| MAX | GPX7     |
| MAX | GRAMD1C  |
| MAX | GRAP2    |
| MAX | GSPT2    |
| MAX | GSR      |
| MAX | GTF2H5   |
| MAX | GTF2IRD2 |
| MAX | GTF3A    |
| MAX | GXYLT1   |
| MAX | H3F3B    |
| MAX | HCLS1    |
| MAX | HEXA     |
| MAX | HIGD1A   |
| MAX | HIVEP2   |
| MAX | HLA-E    |
| MAX | HMG20B   |
| MAX | HMGCS1   |
| MAX | HNRNPDL  |
| MAX | HOTAIRM1 |
| MAX | HPS3     |
| MAX | HSD17B11 |
| MAX | IARS     |
| MAX | IDE      |
| MAX | IDH3A    |



|     |           |
|-----|-----------|
| MAX | IFI30     |
| MAX | IFNGR1    |
| MAX | IKZF3     |
| MAX | IL12RB1   |
| MAX | IL2RG     |
| MAX | IMP3      |
| MAX | ING3      |
| MAX | INTS1     |
| MAX | INTS10    |
| MAX | INTS9     |
| MAX | IRF2      |
| MAX | IRF8      |
| MAX | ITFG1     |
| MAX | ITPA      |
| MAX | IVNS1ABP  |
| MAX | JADE2     |
| MAX | JOSD1     |
| MAX | JPX       |
| MAX | KBTBD4    |
| MAX | KCTD15    |
| MAX | KCTD17    |
| MAX | KDM3A     |
| MAX | KDM5B     |
| MAX | KIAA0319L |
| MAX | KLC2      |
| MAX | KLF2      |
| MAX | KLF6      |
| MAX | KLHDC2    |
| MAX | KLHDC4    |
| MAX | KPNA6     |
| MAX | L1CAM     |
| MAX | LACTB2    |
| MAX | LAMP1     |
| MAX | LAMTOR5   |
| MAX | LEMD2     |
| MAX | LENG8     |
| MAX | LGALS3    |
| MAX | LINC00909 |
| MAX | LINC01003 |
| MAX | LINC01116 |
| MAX | LMBR1     |
| MAX | LMF1      |
| MAX | LM02      |
| MAX | LMTK2     |
| MAX | LSM6      |
| MAX | LTB       |
| MAX | LYN       |
| MAX | LYPLAL1   |
| MAX | LZIC      |
| MAX | M6PR      |

|     |         |
|-----|---------|
| MAX | MAEA    |
| MAX | MAP2K7  |
| MAX | MAPK6   |
| MAX | MARCH6  |
| MAX | MARS2   |
| MAX | MAST2   |
| MAX | MATK    |
| MAX | MAX     |
| MAX | MAZ     |
| MAX | MBOAT7  |
| MAX | MBP     |
| MAX | MCPH1   |
| MAX | MEAF6   |
| MAX | MED16   |
| MAX | MEN1    |
| MAX | METAP1  |
| MAX | MICALL1 |
| MAX | MIEF1   |
| MAX | MINPP1  |
| MAX | MIS12   |
| MAX | MNT     |
| MAX | MOB1A   |
| MAX | MORF4L2 |
| MAX | MRPL11  |
| MAX | MRPL15  |
| MAX | MRPL20  |
| MAX | MRPL45  |
| MAX | MRPS22  |
| MAX | MTHFR   |
| MAX | MTPN    |
| MAX | MTRF1   |
| MAX | MTRF1L  |
| MAX | MUM1    |
| MAX | MYD88   |
| MAX | MYL12A  |
| MAX | MYL12B  |
| MAX | N4BP2L2 |
| MAX | NACA    |
| MAX | NAP1L1  |
| MAX | NARF    |
| MAX | NBAS    |
| MAX | NBPF12  |
| MAX | NCOA2   |
| MAX | NDUFC1  |
| MAX | NDUFS7  |
| MAX | NEMF    |
| MAX | NF2     |
| MAX | NFE2L2  |
| MAX | NKAP    |
| MAX | NKRF    |

|     |            |
|-----|------------|
| MAX | NPAS1      |
| MAX | NPHP3      |
| MAX | NPM1       |
| MAX | NR2C1      |
| MAX | NSUN5      |
| MAX | NT5DC3     |
| MAX | NUDT9      |
| MAX | NUP50      |
| MAX | NUTM2A-AS1 |
| MAX | NUTM2B-AS1 |
| MAX | OARD1      |
| MAX | OTUD6B-AS1 |
| MAX | PACIN3     |
| MAX | PAGR1      |
| MAX | PAIP1      |
| MAX | PAK1IP1    |
| MAX | PCGF1      |
| MAX | PCY0X1     |
| MAX | PCYT1A     |
| MAX | PDLIM1     |
| MAX | PEX11B     |
| MAX | PEX2       |
| MAX | PFDN5      |
| MAX | PFKFB3     |
| MAX | PGBD4      |
| MAX | PHACTR4    |
| MAX | PHB        |
| MAX | PIGQ       |
| MAX | PKD2       |
| MAX | PKN2       |
| MAX | PLA2G6     |
| MAX | PLCL2      |
| MAX | PLEKHA1    |
| MAX | PLEKH01    |
| MAX | PLP2       |
| MAX | PLRG1      |
| MAX | PMPCB      |
| MAX | PNKP       |
| MAX | PNN        |
| MAX | POC5       |
| MAX | POLB       |
| MAX | POLK       |
| MAX | POLR3D     |
| MAX | POP4       |
| MAX | PPA1       |
| MAX | PPCS       |
| MAX | PPIL1      |
| MAX | PPP1R12A   |
| MAX | PPP1R14A   |
| MAX | PPP2R2D    |

|     |         |
|-----|---------|
| MAX | PPP4R3A |
| MAX | PPP6R3  |
| MAX | PRCP    |
| MAX | PRKCB   |
| MAX | PRKCE   |
| MAX | PRKCZ   |
| MAX | PRR13   |
| MAX | PSMB9   |
| MAX | PSTPIP1 |
| MAX | PTOV1   |
| MAX | PUM1    |
| MAX | PUM3    |
| MAX | PUSL1   |
| MAX | PYHIN1  |
| MAX | RAB11B  |
| MAX | RAB2A   |
| MAX | RAB4A   |
| MAX | RABEP1  |
| MAX | RACK1   |
| MAX | RALB    |
| MAX | RANGRF  |
| MAX | RARS    |
| MAX | RASAL3  |
| MAX | RB1CC1  |
| MAX | RBMXL1  |
| MAX | RBPJ    |
| MAX | RCE1    |
| MAX | RCN1    |
| MAX | RDH5    |
| MAX | RELL2   |
| MAX | RFX5    |
| MAX | RICTOR  |
| MAX | RIOK3   |
| MAX | RIT1    |
| MAX | RMDN3   |
| MAX | RNASEK  |
| MAX | RNF103  |
| MAX | RNF13   |
| MAX | RNF167  |
| MAX | RNF168  |
| MAX | RNF216  |
| MAX | RNMT    |
| MAX | RPL10   |
| MAX | RPL10A  |
| MAX | RPL11   |
| MAX | RPL12   |
| MAX | RPL13A  |
| MAX | RPL15   |
| MAX | RPL18A  |
| MAX | RPL19   |

|     |         |
|-----|---------|
| MAX | RPL23   |
| MAX | RPL23A  |
| MAX | RPL24   |
| MAX | RPL26   |
| MAX | RPL26L1 |
| MAX | RPL27   |
| MAX | RPL3    |
| MAX | RPL30   |
| MAX | RPL31   |
| MAX | RPL32   |
| MAX | RPL34   |
| MAX | RPL35   |
| MAX | RPL35A  |
| MAX | RPL36   |
| MAX | RPL37   |
| MAX | RPL38   |
| MAX | RPL39   |
| MAX | RPL41   |
| MAX | RPL7    |
| MAX | RPL7L1  |
| MAX | RPL8    |
| MAX | RPL9    |
| MAX | RPS11   |
| MAX | RPS13   |
| MAX | RPS14   |
| MAX | RPS15   |
| MAX | RPS18   |
| MAX | RPS19   |
| MAX | RPS21   |
| MAX | RPS25   |
| MAX | RPS27   |
| MAX | RPS27A  |
| MAX | RPS29   |
| MAX | RPS3    |
| MAX | RPS3A   |
| MAX | RPS4X   |
| MAX | RPS5    |
| MAX | RPS6    |
| MAX | RPS7    |
| MAX | RPS8    |
| MAX | RPUSD2  |
| MAX | RRM2B   |
| MAX | RRP1B   |
| MAX | RXRB    |
| MAX | SART1   |
| MAX | SCLT1   |
| MAX | SDCCAG8 |
| MAX | SDR39U1 |
| MAX | SERINC3 |
| MAX | SESTD1  |

|     |          |
|-----|----------|
| MAX | SFT2D1   |
| MAX | SFXN2    |
| MAX | SGPL1    |
| MAX | SGPP2    |
| MAX | SH2B1    |
| MAX | SH3D19   |
| MAX | SIAH1    |
| MAX | SIK3     |
| MAX | SIMC1    |
| MAX | SIRT7    |
| MAX | SLC25A22 |
| MAX | SLC2A11  |
| MAX | SLC35B3  |
| MAX | SLC38A2  |
| MAX | SLC39A1  |
| MAX | SLC4A1AP |
| MAX | SLC9A3   |
| MAX | SLC03A1  |
| MAX | SLC04A1  |
| MAX | SLF2     |
| MAX | SLU7     |
| MAX | SMC5     |
| MAX | SMIM14   |
| MAX | SMIM19   |
| MAX | SMPD2    |
| MAX | SMPDL3A  |
| MAX | SMYD2    |
| MAX | SNX2     |
| MAX | SP1      |
| MAX | SP100    |
| MAX | SPATA6   |
| MAX | SRGN     |
| MAX | SS18L2   |
| MAX | STAMBPL1 |
| MAX | STAT6    |
| MAX | STK25    |
| MAX | STK33    |
| MAX | STYXL1   |
| MAX | SUCLG1   |
| MAX | SUGP2    |
| MAX | SULF2    |
| MAX | SURF6    |
| MAX | SYNJ2BP  |
| MAX | TAF1C    |
| MAX | TAGLN2   |
| MAX | TAP2     |
| MAX | TASP1    |
| MAX | TATDN3   |
| MAX | TBCA     |
| MAX | TCEAL9   |

|     |           |
|-----|-----------|
| MAX | TCTN3     |
| MAX | TEX261    |
| MAX | TGFB1     |
| MAX | TGFB1I1   |
| MAX | TGOLN2    |
| MAX | THAP9-AS1 |
| MAX | THOC1     |
| MAX | TIPARP    |
| MAX | TJAP1     |
| MAX | TM2D1     |
| MAX | TMBIM1    |
| MAX | TMBIM4    |
| MAX | TMC6      |
| MAX | TMED1     |
| MAX | TMEM11    |
| MAX | TMEM14B   |
| MAX | TMEM186   |
| MAX | TMEM220   |
| MAX | TMF1      |
| MAX | TNFAIP1   |
| MAX | TNRC6A    |
| MAX | TNRC6B    |
| MAX | TOMM7     |
| MAX | TOMM70    |
| MAX | TOP1MT    |
| MAX | TRAF3IP3  |
| MAX | TRAF6     |
| MAX | TRAP1     |
| MAX | TRAPPC4   |
| MAX | TRAPPC9   |
| MAX | TRIM11    |
| MAX | TRIM24    |
| MAX | TRIM8     |
| MAX | TRIP4     |
| MAX | TRMT2B    |
| MAX | TROVE2    |
| MAX | TSC22D1   |
| MAX | TSEN34    |
| MAX | TTBK2     |
| MAX | TTC3      |
| MAX | TTL       |
| MAX | TUBA1A    |
| MAX | TUBB3     |
| MAX | TWISTNB   |
| MAX | TXNL4B    |
| MAX | U2AF1     |
| MAX | UBA5      |
| MAX | UBA52     |
| MAX | UBAP2L    |
| MAX | UBC       |

|     |            |
|-----|------------|
| MAX | UBE2Q2     |
| MAX | UBIAD1     |
| MAX | UBR5       |
| MAX | UBR7       |
| MAX | UBXN1      |
| MAX | UBXN2A     |
| MAX | UNC50      |
| MAX | UQCRB      |
| MAX | USE1       |
| MAX | USP15      |
| MAX | USP24      |
| MAX | USP25      |
| MAX | USP30-AS1  |
| MAX | USP32      |
| MAX | UTP11      |
| MAX | UTP3       |
| MAX | UTRN       |
| MAX | VCL        |
| MAX | VHL        |
| MAX | VILL       |
| MAX | VMP1       |
| MAX | VPS33B     |
| MAX | VPS36      |
| MAX | VPS72      |
| MAX | VTI1B      |
| MAX | WARS2      |
| MAX | WBP11      |
| MAX | WDR45      |
| MAX | WDR82      |
| MAX | WFS1       |
| MAX | WRAP53     |
| MAX | WRAP73     |
| MAX | XRCC5      |
| MAX | YBX3       |
| MAX | YIF1A      |
| MAX | YIPF4      |
| MAX | YTHDF3-AS1 |
| MAX | YWHAZ      |
| MAX | ZBED5-AS1  |
| MAX | ZDHHC21    |
| MAX | ZDHHC6     |
| MAX | ZDHHC7     |
| MAX | ZFAND5     |
| MAX | ZFC3H1     |
| MAX | ZFP36      |
| MAX | ZFP36L1    |
| MAX | ZFYVE16    |
| MAX | ZHX2       |
| MAX | ZKSCAN1    |
| MAX | ZMYM2      |



|     |          |
|-----|----------|
| MAX | ZMYND11  |
| MAX | ZNF181   |
| MAX | ZNF202   |
| MAX | ZNF335   |
| MAX | ZNF347   |
| MAX | ZNF414   |
| MAX | ZNF587   |
| MAX | ZNF691   |
| MAX | ZNF768   |
| MAX | ZNF800   |
| MAX | ZNF83    |
| MAX | ZNFX1    |
| MAX | ZRSR2    |
| MAZ | AATF     |
| MAZ | ABCD3    |
| MAZ | ABCD4    |
| MAZ | ABHD11   |
| MAZ | ABHD13   |
| MAZ | ABHD16A  |
| MAZ | ABHD17A  |
| MAZ | ACACA    |
| MAZ | ACAT2    |
| MAZ | ACTL6A   |
| MAZ | ACTR1A   |
| MAZ | ACYP1    |
| MAZ | ADAM10   |
| MAZ | ADH5     |
| MAZ | ADNP     |
| MAZ | AFF4     |
| MAZ | AGL      |
| MAZ | AGPAT5   |
| MAZ | AHCY     |
| MAZ | AK3      |
| MAZ | ALAS1    |
| MAZ | ANAPC11  |
| MAZ | ANK1     |
| MAZ | ANKHD1   |
| MAZ | ANP32B   |
| MAZ | ANP32E   |
| MAZ | ANXA4    |
| MAZ | AP2B1    |
| MAZ | AP2S1    |
| MAZ | AP4S1    |
| MAZ | AP5M1    |
| MAZ | APEH     |
| MAZ | ARF6     |
| MAZ | ARFIP1   |
| MAZ | ARHGAP27 |
| MAZ | ARHGDIA  |
| MAZ | ARHGEF1  |

|     |          |
|-----|----------|
| MAZ | ARHGEF39 |
| MAZ | ARID1A   |
| MAZ | ARL5B    |
| MAZ | ARL8A    |
| MAZ | ARMCX6   |
| MAZ | ASCC1    |
| MAZ | ASF1B    |
| MAZ | ASPSCR1  |
| MAZ | ATAD2    |
| MAZ | ATAD5    |
| MAZ | ATF6B    |
| MAZ | ATG3     |
| MAZ | ATL3     |
| MAZ | ATP6V0E1 |
| MAZ | ATP6V1A  |
| MAZ | B3GNTL1  |
| MAZ | BAG1     |
| MAZ | BANF1    |
| MAZ | BARD1    |
| MAZ | BAZ1A    |
| MAZ | BBIP1    |
| MAZ | BCL7B    |
| MAZ | BCL7C    |
| MAZ | BCOR     |
| MAZ | BEX4     |
| MAZ | BLOC1S1  |
| MAZ | BLZF1    |
| MAZ | BNIP3L   |
| MAZ | BRAP     |
| MAZ | BTG3     |
| MAZ | C11orf24 |
| MAZ | C11orf58 |
| MAZ | C12orf10 |
| MAZ | C12orf65 |
| MAZ | C15orf61 |
| MAZ | C19orf25 |
| MAZ | C21orf58 |
| MAZ | C3orf38  |
| MAZ | C5orf34  |
| MAZ | C6orf52  |
| MAZ | C9orf16  |
| MAZ | C9orf40  |
| MAZ | CALM1    |
| MAZ | CAMK2D   |
| MAZ | CAMK4    |
| MAZ | CAMLG    |
| MAZ | CAMTA1   |
| MAZ | CAND1    |
| MAZ | CAPN1    |
| MAZ | CAPRIN1  |

|     |          |
|-----|----------|
| MAZ | CARHSP1  |
| MAZ | CARNMT1  |
| MAZ | CARS2    |
| MAZ | CASP3    |
| MAZ | CASP8AP2 |
| MAZ | CASZ1    |
| MAZ | CBX1     |
| MAZ | CBX2     |
| MAZ | CBX3     |
| MAZ | CCDC15   |
| MAZ | CCDC167  |
| MAZ | CCDC71   |
| MAZ | CCDC77   |
| MAZ | CCDC84   |
| MAZ | CCNE1    |
| MAZ | CCNE2    |
| MAZ | CCZ1     |
| MAZ | CD163L1  |
| MAZ | CD24     |
| MAZ | CD2AP    |
| MAZ | CDC123   |
| MAZ | CDC23    |
| MAZ | CDC34    |
| MAZ | CDC37    |
| MAZ | CDC45    |
| MAZ | CDCA5    |
| MAZ | CDK1     |
| MAZ | CDK14    |
| MAZ | CDK17    |
| MAZ | CDK19    |
| MAZ | CDK2     |
| MAZ | CDKN2A   |
| MAZ | CDKN2AIP |
| MAZ | CDKN2C   |
| MAZ | CDKN2D   |
| MAZ | CDT1     |
| MAZ | CENPA    |
| MAZ | CENPBD1  |
| MAZ | CENPM    |
| MAZ | CENPP    |
| MAZ | CENPU    |
| MAZ | CEP295   |
| MAZ | CEP72    |
| MAZ | CEP78    |
| MAZ | CEP95    |
| MAZ | CERK     |
| MAZ | CFAP20   |
| MAZ | CFL1     |
| MAZ | CHAF1A   |
| MAZ | CHD4     |

|     |           |
|-----|-----------|
| MAZ | CHEK2     |
| MAZ | CHFR      |
| MAZ | CHIC2     |
| MAZ | CHMP7     |
| MAZ | CIA01     |
| MAZ | CIB1      |
| MAZ | CIC       |
| MAZ | CIITA     |
| MAZ | CIZ1      |
| MAZ | CKMT2-AS1 |
| MAZ | CLCN6     |
| MAZ | CLIC1     |
| MAZ | CLIC4     |
| MAZ | CLNS1A    |
| MAZ | CLSPN     |
| MAZ | CMC2      |
| MAZ | CNPPD1    |
| MAZ | CNTNAP2   |
| MAZ | COASY     |
| MAZ | COCH      |
| MAZ | COMMD4    |
| MAZ | COMTD1    |
| MAZ | COPS7A    |
| MAZ | COPS7B    |
| MAZ | COX5A     |
| MAZ | COX6B1    |
| MAZ | COX7B     |
| MAZ | COX8A     |
| MAZ | CPNE5     |
| MAZ | CREM      |
| MAZ | CRIPT     |
| MAZ | CRNKL1    |
| MAZ | CSE1L     |
| MAZ | CSTF1     |
| MAZ | CTCF      |
| MAZ | CTDNEP1   |
| MAZ | CTNNBIP1  |
| MAZ | CUEDC2    |
| MAZ | CUTC      |
| MAZ | CXorf38   |
| MAZ | CYB5R1    |
| MAZ | D2HGDH    |
| MAZ | DCAF11    |
| MAZ | DCAF12    |
| MAZ | DCAF15    |
| MAZ | DCAF6     |
| MAZ | DCPS      |
| MAZ | DDT       |
| MAZ | DDX39A    |
| MAZ | DDX46     |

|     |           |
|-----|-----------|
| MAZ | DEK       |
| MAZ | DEPDC5    |
| MAZ | DHPS      |
| MAZ | DHX9      |
| MAZ | DIAPH1    |
| MAZ | DIAPH3    |
| MAZ | DNAJC14   |
| MAZ | DNAJC9    |
| MAZ | DONSON    |
| MAZ | DPF1      |
| MAZ | DPM1      |
| MAZ | DTD1      |
| MAZ | DTX2      |
| MAZ | DUSP23    |
| MAZ | DUT       |
| MAZ | DVL3      |
| MAZ | DYNLL2    |
| MAZ | DYRK1A    |
| MAZ | E2F7      |
| MAZ | EIF2B1    |
| MAZ | EIF3H     |
| MAZ | ELAC2     |
| MAZ | ELMSAN1   |
| MAZ | ELOF1     |
| MAZ | ELP5      |
| MAZ | EMC4      |
| MAZ | EME1      |
| MAZ | EML3      |
| MAZ | EMSY      |
| MAZ | EP400     |
| MAZ | EPN1      |
| MAZ | ERI1      |
| MAZ | ESC02     |
| MAZ | ESRRA     |
| MAZ | EX01      |
| MAZ | EX0C3     |
| MAZ | EX0C3-AS1 |
| MAZ | EX0SC2    |
| MAZ | EZH2      |
| MAZ | FAAP20    |
| MAZ | FADD      |
| MAZ | FAM102A   |
| MAZ | FAM111A   |
| MAZ | FAM120A   |
| MAZ | FAM126B   |
| MAZ | FAM53B    |
| MAZ | FAM81A    |
| MAZ | FANCE     |
| MAZ | FANCG     |
| MAZ | FANCI     |

|     |           |
|-----|-----------|
| MAZ | FANCM     |
| MAZ | FBXL18    |
| MAZ | FBX022    |
| MAZ | FBX042    |
| MAZ | FBX05     |
| MAZ | FBX08     |
| MAZ | FBXW2     |
| MAZ | FDPS      |
| MAZ | FEN1      |
| MAZ | FGF14-AS2 |
| MAZ | FHOD1     |
| MAZ | FIBP      |
| MAZ | FKBP5     |
| MAZ | FLOT1     |
| MAZ | FLYWCH1   |
| MAZ | FOXP4     |
| MAZ | FRA10AC1  |
| MAZ | FRG1      |
| MAZ | FSD1      |
| MAZ | FTH1      |
| MAZ | FUS       |
| MAZ | GABPB1    |
| MAZ | GALE      |
| MAZ | GALK1     |
| MAZ | GAPDH     |
| MAZ | GCNT2     |
| MAZ | GDAP2     |
| MAZ | GEMIN6    |
| MAZ | GFI1      |
| MAZ | GIGYF2    |
| MAZ | GINS2     |
| MAZ | GINS3     |
| MAZ | GL01      |
| MAZ | GMFG      |
| MAZ | GMNN      |
| MAZ | GMPS      |
| MAZ | GNAI2     |
| MAZ | GNB2      |
| MAZ | GNG5      |
| MAZ | GNPNAT1   |
| MAZ | GPALPP1   |
| MAZ | GPAT4     |
| MAZ | GRK2      |
| MAZ | GTF2IRD2B |
| MAZ | GUCD1     |
| MAZ | H2AFV     |
| MAZ | H2AFX     |
| MAZ | H2AFY     |
| MAZ | H2AFZ     |
| MAZ | H3F3A     |

|     |           |
|-----|-----------|
| MAZ | HAT1      |
| MAZ | HAUS6     |
| MAZ | HDAC5     |
| MAZ | HDAC8     |
| MAZ | HDDC3     |
| MAZ | HENMT1    |
| MAZ | HES1      |
| MAZ | HES6      |
| MAZ | HINT2     |
| MAZ | HIP1R     |
| MAZ | HIST1H1D  |
| MAZ | HIST1H1E  |
| MAZ | HIST2H2AC |
| MAZ | HMCE5     |
| MAZ | HMGA1     |
| MAZ | HMGB1     |
| MAZ | HMGB2     |
| MAZ | HMGB3     |
| MAZ | HMGCS1    |
| MAZ | HMGN2     |
| MAZ | HMGXB4    |
| MAZ | HMOX2     |
| MAZ | HNRNPA0   |
| MAZ | HNRNPA3   |
| MAZ | HNRNPD    |
| MAZ | HNRNPF    |
| MAZ | HNRNPL    |
| MAZ | HNRNPR    |
| MAZ | HNRNPU    |
| MAZ | HPS3      |
| MAZ | HSPB11    |
| MAZ | HTATSF1   |
| MAZ | HTRA2     |
| MAZ | ID3       |
| MAZ | IFNLR1    |
| MAZ | IKBKB     |
| MAZ | IMPA2     |
| MAZ | INAFM1    |
| MAZ | ING1      |
| MAZ | ING2      |
| MAZ | ING4      |
| MAZ | IP09      |
| MAZ | ISY1      |
| MAZ | ITGB1     |
| MAZ | ITPKA     |
| MAZ | JMJD8     |
| MAZ | KATNA1    |
| MAZ | KATNB1    |
| MAZ | KCNK12    |
| MAZ | KCTD18    |

|     |           |
|-----|-----------|
| MAZ | KDM8      |
| MAZ | KIF22     |
| MAZ | KIFAP3    |
| MAZ | KLF12     |
| MAZ | KLHDC4    |
| MAZ | KPNB1     |
| MAZ | KRCC1     |
| MAZ | LAMTOR1   |
| MAZ | LAS1L     |
| MAZ | LCMT1     |
| MAZ | LCMT2     |
| MAZ | LCORL     |
| MAZ | LDHA      |
| MAZ | LEMD2     |
| MAZ | LINC01013 |
| MAZ | LIPT2     |
| MAZ | LITAF     |
| MAZ | LMNB2     |
| MAZ | LONP1     |
| MAZ | LPGAT1    |
| MAZ | LRP8      |
| MAZ | LRRC20    |
| MAZ | LRRC47    |
| MAZ | LSM2      |
| MAZ | LSM3      |
| MAZ | LSM4      |
| MAZ | LTV1      |
| MAZ | LYL1      |
| MAZ | MAD2L2    |
| MAZ | MAG0H     |
| MAZ | MAML3     |
| MAZ | MAP1LC3B  |
| MAZ | MAP2K5    |
| MAZ | MAP3K4    |
| MAZ | MAP3K7    |
| MAZ | MAP4      |
| MAZ | MAP4K3    |
| MAZ | MAPK1IP1L |
| MAZ | MAPK8     |
| MAZ | MAT2A     |
| MAZ | MAZ       |
| MAZ | MCM2      |
| MAZ | MCM3      |
| MAZ | MCM4      |
| MAZ | MCM5      |
| MAZ | MCM7      |
| MAZ | MEA1      |
| MAZ | MED24     |
| MAZ | MELK      |
| MAZ | METRNL    |



|     |           |
|-----|-----------|
| MAZ | METTL3    |
| MAZ | METTL6    |
| MAZ | METTL9    |
| MAZ | MGAT3     |
| MAZ | MGMT      |
| MAZ | MID1IP1   |
| MAZ | MIF       |
| MAZ | MIF4GD    |
| MAZ | MINCR     |
| MAZ | MINPP1    |
| MAZ | MIR193BHG |
| MAZ | MKLN1     |
| MAZ | MKS1      |
| MAZ | MLST8     |
| MAZ | MLX       |
| MAZ | MORN2     |
| MAZ | MPC1      |
| MAZ | MPC2      |
| MAZ | MPDU1     |
| MAZ | MRPL27    |
| MAZ | MRPL40    |
| MAZ | MRPL43    |
| MAZ | MRPL57    |
| MAZ | MRPS16    |
| MAZ | MRPS18A   |
| MAZ | MRPS26    |
| MAZ | MSANTD2   |
| MAZ | MSANTD4   |
| MAZ | MSH6      |
| MAZ | MTERF3    |
| MAZ | MTHFR     |
| MAZ | MTIF3     |
| MAZ | MUT       |
| MAZ | MYADM     |
| MAZ | MYBL2     |
| MAZ | MYL6B     |
| MAZ | MYLK-AS1  |
| MAZ | MYLPF     |
| MAZ | MYNN      |
| MAZ | N4BP2     |
| MAZ | NAP1L4    |
| MAZ | NAPEPLD   |
| MAZ | NARS2     |
| MAZ | NASP      |
| MAZ | NAT14     |
| MAZ | NAXE      |
| MAZ | NCAPG2    |
| MAZ | NCAPH2    |
| MAZ | NDUFA6    |
| MAZ | NDUFB11   |

|     |         |
|-----|---------|
| MAZ | NDUFS1  |
| MAZ | NDUFS3  |
| MAZ | NDUFS7  |
| MAZ | NDUFS8  |
| MAZ | NELFE   |
| MAZ | NEMP2   |
| MAZ | NET1    |
| MAZ | NFATC2  |
| MAZ | NFKBIL1 |
| MAZ | NFYB    |
| MAZ | NIT1    |
| MAZ | NKRF    |
| MAZ | NLRC3   |
| MAZ | NME4    |
| MAZ | NONO    |
| MAZ | NOSIP   |
| MAZ | NPTN    |
| MAZ | NR4A3   |
| MAZ | NRDE2   |
| MAZ | NT5DC3  |
| MAZ | NTAN1   |
| MAZ | NUB1    |
| MAZ | NUDC    |
| MAZ | NUDT1   |
| MAZ | NUDT21  |
| MAZ | NUFIP2  |
| MAZ | NUMA1   |
| MAZ | NUP107  |
| MAZ | NUP210  |
| MAZ | NUP214  |
| MAZ | NUP62   |
| MAZ | NXF1    |
| MAZ | ORC1    |
| MAZ | OSBP    |
| MAZ | P3H1    |
| MAZ | PABPC4  |
| MAZ | PABPN1  |
| MAZ | PANK2   |
| MAZ | PAQR4   |
| MAZ | PARD6A  |
| MAZ | PARP3   |
| MAZ | PARP8   |
| MAZ | PBRM1   |
| MAZ | PCBP2   |
| MAZ | PCGF6   |
| MAZ | PDAP1   |
| MAZ | PDCD6IP |
| MAZ | PDE12   |
| MAZ | PDLIM1  |
| MAZ | PDLIM5  |

|     |         |
|-----|---------|
| MAZ | PDS5A   |
| MAZ | PDXDC1  |
| MAZ | PEX10   |
| MAZ | PEX19   |
| MAZ | PFN1    |
| MAZ | PGAM1   |
| MAZ | PGM1    |
| MAZ | PGP     |
| MAZ | PGRMC1  |
| MAZ | PHF13   |
| MAZ | PHF19   |
| MAZ | PHF20   |
| MAZ | PICALM  |
| MAZ | PIGG    |
| MAZ | PIH1D1  |
| MAZ | PIK3CD  |
| MAZ | PIN1    |
| MAZ | PIP5K1C |
| MAZ | PKIG    |
| MAZ | PLEKHM2 |
| MAZ | PLEKH01 |
| MAZ | PLK4    |
| MAZ | PMM1    |
| MAZ | PNKD    |
| MAZ | POC5    |
| MAZ | POLA1   |
| MAZ | POLDIP2 |
| MAZ | POLG2   |
| MAZ | POLR2G  |
| MAZ | POLRMT  |
| MAZ | POP7    |
| MAZ | PPIA    |
| MAZ | PPIF    |
| MAZ | PPIG    |
| MAZ | PPM1G   |
| MAZ | PPP1CA  |
| MAZ | PPP1R10 |
| MAZ | PPP1R37 |
| MAZ | PPP2R5D |
| MAZ | PRCC    |
| MAZ | PRIM2   |
| MAZ | PRKCA   |
| MAZ | PRKCD   |
| MAZ | PRKD2   |
| MAZ | PRKDC   |
| MAZ | PRMT7   |
| MAZ | PRPF38A |
| MAZ | PRPF38B |
| MAZ | PRPS1   |
| MAZ | PRPS2   |

|     |        |
|-----|--------|
| MAZ | PRR13  |
| MAZ | PRRC2A |
| MAZ | PRRC2B |
| MAZ | PRRG4  |
| MAZ | PSMB3  |
| MAZ | PSMC1  |
| MAZ | PSMC3  |
| MAZ | PSMD14 |
| MAZ | PSMD8  |
| MAZ | PSMG3  |
| MAZ | PTAFR  |
| MAZ | PTBP1  |
| MAZ | PTGES3 |
| MAZ | PTMA   |
| MAZ | PTPN12 |
| MAZ | PTRH1  |
| MAZ | PWP2   |
| MAZ | PXMP2  |
| MAZ | RAB22A |
| MAZ | RAB27A |
| MAZ | RAB2A  |
| MAZ | RABEP2 |
| MAZ | RAD1   |
| MAZ | RAD51D |
| MAZ | RAE1   |
| MAZ | RALB   |
| MAZ | RALY   |
| MAZ | RANBP1 |
| MAZ | RANBP2 |
| MAZ | RANBP3 |
| MAZ | RASSF1 |
| MAZ | RASSF5 |
| MAZ | RBBP7  |
| MAZ | RBL1   |
| MAZ | RBM10  |
| MAZ | RBM12  |
| MAZ | RBMX2  |
| MAZ | RCAN3  |
| MAZ | RCHY1  |
| MAZ | RECQL  |
| MAZ | REEP4  |
| MAZ | REPS1  |
| MAZ | RFC2   |
| MAZ | RFC3   |
| MAZ | RFC4   |
| MAZ | RFC5   |
| MAZ | RFT1   |
| MAZ | RFX2   |
| MAZ | RGCC   |
| MAZ | RHN01  |

|     |          |
|-----|----------|
| MAZ | RIC8A    |
| MAZ | RIF1     |
| MAZ | RMI2     |
| MAZ | RNASEH2A |
| MAZ | RNASEH2B |
| MAZ | RNASEH2C |
| MAZ | RNF144B  |
| MAZ | RNF168   |
| MAZ | RNF34    |
| MAZ | RNF4     |
| MAZ | ROGDI    |
| MAZ | RPE      |
| MAZ | RPL11    |
| MAZ | RPL12    |
| MAZ | RPL29    |
| MAZ | RPL31    |
| MAZ | RPL37    |
| MAZ | RPL38    |
| MAZ | RPL41    |
| MAZ | RPLP0    |
| MAZ | RPLP1    |
| MAZ | RPLP2    |
| MAZ | RPS10    |
| MAZ | RPS2     |
| MAZ | RPS21    |
| MAZ | RPS3A    |
| MAZ | RPS5     |
| MAZ | RPS6KB1  |
| MAZ | RPS6KB2  |
| MAZ | RPSA     |
| MAZ | RRM1     |
| MAZ | RRM2     |
| MAZ | RSRP1    |
| MAZ | RSU1     |
| MAZ | RTN4     |
| MAZ | RXRB     |
| MAZ | SAC3D1   |
| MAZ | SAMD15   |
| MAZ | SAMM50   |
| MAZ | SCAI     |
| MAZ | SCNM1    |
| MAZ | SDCCAG8  |
| MAZ | SDHB     |
| MAZ | SDHD     |
| MAZ | SEC11A   |
| MAZ | SEC16A   |
| MAZ | SEC22A   |
| MAZ | SENP7    |
| MAZ | SEPT11   |
| MAZ | SEPT6    |

|     |          |
|-----|----------|
| MAZ | SEPT7    |
| MAZ | SETD5    |
| MAZ | SETD7    |
| MAZ | SF3A3    |
| MAZ | SF3B4    |
| MAZ | SG01     |
| MAZ | SHMT2    |
| MAZ | SHR00M1  |
| MAZ | SIAH1    |
| MAZ | SIMC1    |
| MAZ | SIPA1    |
| MAZ | SIVA1    |
| MAZ | SKA3     |
| MAZ | SKP2     |
| MAZ | SLAIN2   |
| MAZ | SLBP     |
| MAZ | SLC10A3  |
| MAZ | SLC18B1  |
| MAZ | SLC1A4   |
| MAZ | SLC25A1  |
| MAZ | SLC25A28 |
| MAZ | SLC25A36 |
| MAZ | SLC25A40 |
| MAZ | SLC2A1   |
| MAZ | SLC2A8   |
| MAZ | SLC35A5  |
| MAZ | SLC46A3  |
| MAZ | SLC52A2  |
| MAZ | SLC6A9   |
| MAZ | SLC7A1   |
| MAZ | SLC9A3R1 |
| MAZ | SLF1     |
| MAZ | SMAD2    |
| MAZ | SMC1B    |
| MAZ | SMC4     |
| MAZ | SMCHD1   |
| MAZ | SMG5     |
| MAZ | SMIM19   |
| MAZ | SMIM7    |
| MAZ | SNAPC5   |
| MAZ | SNRNP40  |
| MAZ | SNRPA    |
| MAZ | SNRPA1   |
| MAZ | SNRPD1   |
| MAZ | SNRPG    |
| MAZ | SNX1     |
| MAZ | SNX17    |
| MAZ | SPAG1    |
| MAZ | SPATA33  |
| MAZ | SPATS2L  |

|     |          |
|-----|----------|
| MAZ | SPC25    |
| MAZ | SPECC1L  |
| MAZ | SPHK2    |
| MAZ | SPOP     |
| MAZ | SRRM1    |
| MAZ | SRRM2    |
| MAZ | SRRT     |
| MAZ | SRSF10   |
| MAZ | SRSF2    |
| MAZ | SRSF4    |
| MAZ | SSRP1    |
| MAZ | ST14     |
| MAZ | STAG2    |
| MAZ | STAG3    |
| MAZ | STARD7   |
| MAZ | STAU1    |
| MAZ | STK16    |
| MAZ | STK38L   |
| MAZ | STMN1    |
| MAZ | STX11    |
| MAZ | STYXL1   |
| MAZ | SUB1     |
| MAZ | SUM02    |
| MAZ | SUV39H2  |
| MAZ | SUZ12    |
| MAZ | SVBP     |
| MAZ | SYNJ2BP  |
| MAZ | TACC1    |
| MAZ | TAF12    |
| MAZ | TAF15    |
| MAZ | TAF9B    |
| MAZ | TANG02   |
| MAZ | TAPT1    |
| MAZ | TARDBP   |
| MAZ | TAX1BP3  |
| MAZ | TBC1D10A |
| MAZ | TBC1D15  |
| MAZ | TBC1D9B  |
| MAZ | TBCCD1   |
| MAZ | TBPL1    |
| MAZ | TBRG1    |
| MAZ | TCL1A    |
| MAZ | TCOF1    |
| MAZ | TERF1    |
| MAZ | TFDP1    |
| MAZ | TFE3     |
| MAZ | TFEB     |
| MAZ | THAP7    |
| MAZ | THOC3    |
| MAZ | THOP1    |

|     |             |
|-----|-------------|
| MAZ | THUMPD3-AS1 |
| MAZ | TIAL1       |
| MAZ | TIMM10      |
| MAZ | TM7SF3      |
| MAZ | TMCC1       |
| MAZ | TMC03       |
| MAZ | TMEM107     |
| MAZ | TMEM116     |
| MAZ | TMEM141     |
| MAZ | TMEM216     |
| MAZ | TMEM258     |
| MAZ | TMEM267     |
| MAZ | TMEM41B     |
| MAZ | TMP0        |
| MAZ | TMSB10      |
| MAZ | TMUB1       |
| MAZ | TNP03       |
| MAZ | TOE1        |
| MAZ | TOMM5       |
| MAZ | TOP1        |
| MAZ | TOPORS      |
| MAZ | TP53I13     |
| MAZ | TPGS1       |
| MAZ | TPI1        |
| MAZ | TPM3        |
| MAZ | TPR         |
| MAZ | TPRA1       |
| MAZ | TRAPPC4     |
| MAZ | TRIM47      |
| MAZ | TRIM52      |
| MAZ | TRIP13      |
| MAZ | TRIT1       |
| MAZ | TRUB2       |
| MAZ | TSPAN14     |
| MAZ | TSTD1       |
| MAZ | TTC21B      |
| MAZ | TTI2        |
| MAZ | TTK         |
| MAZ | TUBA1B      |
| MAZ | TUBA4A      |
| MAZ | TUBB        |
| MAZ | TUBB2A      |
| MAZ | TUBB2B      |
| MAZ | TUBG1       |
| MAZ | TUBGCP6     |
| MAZ | TULP3       |
| MAZ | TYMS        |
| MAZ | U2AF2       |
| MAZ | UBA52       |
| MAZ | UBAC2       |



|     |         |
|-----|---------|
| MAZ | UBB     |
| MAZ | UBE2B   |
| MAZ | UBE2Q1  |
| MAZ | UBE2Q2  |
| MAZ | UBL4A   |
| MAZ | UBL7    |
| MAZ | UBTF    |
| MAZ | UBXN1   |
| MAZ | UBXN7   |
| MAZ | UHRF1   |
| MAZ | ULK3    |
| MAZ | UNG     |
| MAZ | UPF2    |
| MAZ | UPF3B   |
| MAZ | UQCRFS1 |
| MAZ | UQCRH   |
| MAZ | URB1    |
| MAZ | URM1    |
| MAZ | USP1    |
| MAZ | USP4    |
| MAZ | USP46   |
| MAZ | VDAC1   |
| MAZ | VDAC3   |
| MAZ | VEGFB   |
| MAZ | VPS25   |
| MAZ | VPS45   |
| MAZ | VPS4B   |
| MAZ | WAS     |
| MAZ | WASF1   |
| MAZ | WBP1L   |
| MAZ | WDR1    |
| MAZ | WDR24   |
| MAZ | WDR34   |
| MAZ | WDR70   |
| MAZ | WDR76   |
| MAZ | WDTC1   |
| MAZ | XAB2    |
| MAZ | XP01    |
| MAZ | XPR1    |
| MAZ | XRCC1   |
| MAZ | XRCC4   |
| MAZ | XRCC5   |
| MAZ | YBX1    |
| MAZ | YIPF5   |
| MAZ | YME1L1  |
| MAZ | YWHAH   |
| MAZ | YY1     |
| MAZ | ZBED5   |
| MAZ | ZBTB48  |
| MAZ | ZBTB80S |

|       |            |
|-------|------------|
| MAZ   | ZDHC12     |
| MAZ   | ZDHC21     |
| MAZ   | ZEB1       |
| MAZ   | ZFAND2B    |
| MAZ   | ZFP91      |
| MAZ   | ZFYVE21    |
| MAZ   | ZKSCAN4    |
| MAZ   | ZMAT5      |
| MAZ   | ZNF143     |
| MAZ   | ZNF212     |
| MAZ   | ZNF292     |
| MAZ   | ZNF395     |
| MAZ   | ZNF408     |
| MAZ   | ZNF507     |
| MAZ   | ZNF639     |
| MAZ   | ZNF687     |
| MAZ   | ZNF706     |
| MAZ   | ZSCAN21    |
| MBD4  | ARHGDIB    |
| MBD4  | HHEX       |
| MBD4  | MEF2C      |
| MBD4  | PTPRC      |
| MBD4  | STX7       |
| MBD4  | TMEM156    |
| MEF2A | AAK1       |
| MEF2A | ACIN1      |
| MEF2A | ADD3       |
| MEF2A | AFF3       |
| MEF2A | AG04       |
| MEF2A | AHNAK      |
| MEF2A | AMFR       |
| MEF2A | AP1G1      |
| MEF2A | AP2S1      |
| MEF2A | AP4S1      |
| MEF2A | APLP2      |
| MEF2A | ARID1A     |
| MEF2A | ATAD5      |
| MEF2A | AZIN1      |
| MEF2A | BBS4       |
| MEF2A | BBX        |
| MEF2A | BCL11A     |
| MEF2A | BCL2L13    |
| MEF2A | BCLAF1     |
| MEF2A | BPTF       |
| MEF2A | C12orf65   |
| MEF2A | C16orf74   |
| MEF2A | CDKN2AIPNL |
| MEF2A | CEP350     |
| MEF2A | CEP85      |
| MEF2A | CHD3       |

|       |           |
|-------|-----------|
| MEF2A | CLCN4     |
| MEF2A | CPEB4     |
| MEF2A | CREBRF    |
| MEF2A | CRK       |
| MEF2A | CRLF3     |
| MEF2A | CRYZL1    |
| MEF2A | CXXC5     |
| MEF2A | CYTH1     |
| MEF2A | DDX17     |
| MEF2A | EHBP1L1   |
| MEF2A | EIF2S3    |
| MEF2A | EML4      |
| MEF2A | ERBIN     |
| MEF2A | ESR2      |
| MEF2A | FHL3      |
| MEF2A | FNBP1     |
| MEF2A | GABPB1    |
| MEF2A | GCNT2     |
| MEF2A | GDE1      |
| MEF2A | GINS1     |
| MEF2A | GTF2I     |
| MEF2A | HACD1     |
| MEF2A | HDAC9     |
| MEF2A | HELZ      |
| MEF2A | HERC2     |
| MEF2A | HHLA3     |
| MEF2A | IDH1      |
| MEF2A | IKZF3     |
| MEF2A | IP07      |
| MEF2A | ITPKB     |
| MEF2A | ITSN2     |
| MEF2A | JAK1      |
| MEF2A | JAK3      |
| MEF2A | JMJD1C    |
| MEF2A | KCNMB3    |
| MEF2A | KIAA0040  |
| MEF2A | KIF1BP    |
| MEF2A | KLF7      |
| MEF2A | KLHL24    |
| MEF2A | LAMP2     |
| MEF2A | LINC01003 |
| MEF2A | LRCH1     |
| MEF2A | MDM4      |
| MEF2A | MEF2A     |
| MEF2A | MEF2C     |
| MEF2A | MEPCE     |
| MEF2A | MIA2      |
| MEF2A | MID1IP1   |
| MEF2A | MIEN1     |
| MEF2A | MUL1      |

|       |         |
|-------|---------|
| MEF2A | MYH9    |
| MEF2A | MYO1C   |
| MEF2A | MYO9A   |
| MEF2A | NPEPPS  |
| MEF2A | OTUB1   |
| MEF2A | PABPN1  |
| MEF2A | PARP1   |
| MEF2A | PHACTR4 |
| MEF2A | PHF3    |
| MEF2A | PHIP    |
| MEF2A | PHKG1   |
| MEF2A | PIAS1   |
| MEF2A | PIP5K1A |
| MEF2A | PLK3    |
| MEF2A | PNPLA2  |
| MEF2A | POGZ    |
| MEF2A | PPP2R5C |
| MEF2A | PPP2R5E |
| MEF2A | PPP3CC  |
| MEF2A | PRDM2   |
| MEF2A | PRKACB  |
| MEF2A | PRPF39  |
| MEF2A | PXMP4   |
| MEF2A | RAB35   |
| MEF2A | RABGAP1 |
| MEF2A | RALGPS2 |
| MEF2A | RCSD1   |
| MEF2A | REV1    |
| MEF2A | RHOT1   |
| MEF2A | RNF166  |
| MEF2A | RPP25   |
| MEF2A | RUBCN   |
| MEF2A | SAMD8   |
| MEF2A | SCMH1   |
| MEF2A | SEPT9   |
| MEF2A | SETD5   |
| MEF2A | SLC23A2 |
| MEF2A | SLC43A2 |
| MEF2A | SLC44A2 |
| MEF2A | SMG1    |
| MEF2A | SMG6    |
| MEF2A | SNX11   |
| MEF2A | SNX8    |
| MEF2A | STAG1   |
| MEF2A | STAG2   |
| MEF2A | STRN3   |
| MEF2A | SWAP70  |
| MEF2A | TAB2    |
| MEF2A | TAF12   |
| MEF2A | TAOK1   |

|       |            |
|-------|------------|
| MEF2A | TAOK3      |
| MEF2A | TBC1D22A   |
| MEF2A | TBL1XR1    |
| MEF2A | THRAP3     |
| MEF2A | TIA1       |
| MEF2A | TMEM156    |
| MEF2A | TNFRSF13C  |
| MEF2A | TOP2B      |
| MEF2A | TRIM8      |
| MEF2A | TYK2       |
| MEF2A | UGCG       |
| MEF2A | UPF2       |
| MEF2A | USP44      |
| MEF2A | UVRAG      |
| MEF2A | WASF2      |
| MEF2A | XIAP       |
| MEF2A | ZBTB37     |
| MEF2A | ZC3H4      |
| MEF2A | ZC3H7A     |
| MEF2A | ZFAND6     |
| MEF2A | ZFP64      |
| MLX   | AFF1       |
| MLX   | ALOX12-AS1 |
| MLX   | ARFGEF2    |
| MLX   | ARL4A      |
| MLX   | ATP6V0B    |
| MLX   | BACH1      |
| MLX   | C16orf72   |
| MLX   | CACUL1     |
| MLX   | CALR       |
| MLX   | CDV3       |
| MLX   | CDYL       |
| MLX   | CLMN       |
| MLX   | CTSB       |
| MLX   | CUTA       |
| MLX   | DHX30      |
| MLX   | DOK7       |
| MLX   | DYRK2      |
| MLX   | EHMT2      |
| MLX   | EP400      |
| MLX   | EPB41      |
| MLX   | ERP29      |
| MLX   | GTF3A      |
| MLX   | H00K2      |
| MLX   | KCTD20     |
| MLX   | KIAA1217   |
| MLX   | KLF13      |
| MLX   | MFHAS1     |
| MLX   | MFN2       |
| MLX   | MIEF1      |

|      |          |
|------|----------|
| MLX  | MLX      |
| MLX  | MORC2    |
| MLX  | MOSPD1   |
| MLX  | MTDH     |
| MLX  | NDUFB6   |
| MLX  | NFX1     |
| MLX  | NSD1     |
| MLX  | PACIN1   |
| MLX  | PARP6    |
| MLX  | PDK2     |
| MLX  | PEPD     |
| MLX  | PLEC     |
| MLX  | PPP1R21  |
| MLX  | PRDM2    |
| MLX  | RNF185   |
| MLX  | RPS28    |
| MLX  | SCAMP3   |
| MLX  | SCPEP1   |
| MLX  | SLC25A39 |
| MLX  | SLC33A1  |
| MLX  | SLC38A10 |
| MLX  | SPNS1    |
| MLX  | STT3B    |
| MLX  | TDG      |
| MLX  | TMEM154  |
| MLX  | TMEM42   |
| MLX  | TRAPPC2L |
| MLX  | TRAPPC6A |
| MLX  | TRMO     |
| MLX  | TTC3     |
| MLX  | VPS33A   |
| MLX  | ZFAND5   |
| MNT  | CHD7     |
| MNT  | CLCN7    |
| MNT  | DUSP1    |
| MNT  | FAM117A  |
| MNT  | MNT      |
| MNT  | NME6     |
| MNT  | ST3GAL1  |
| MNT  | TXLNG    |
| MXD4 | CALR     |
| MXD4 | DERL1    |
| MXD4 | FKBP11   |
| MXD4 | HM13     |
| MXD4 | HSP90B1  |
| MXD4 | LSP1     |
| MXD4 | MXD4     |
| MXD4 | MYDGF    |
| MXD4 | MZB1     |
| MXD4 | PPIB     |

|      |           |
|------|-----------|
| MXD4 | SEC11C    |
| MXD4 | SSR3      |
| MXI1 | AAED1     |
| MXI1 | ABCB7     |
| MXI1 | AMMECR1   |
| MXI1 | APP       |
| MXI1 | ARID5B    |
| MXI1 | ARL13B    |
| MXI1 | ARRDC2    |
| MXI1 | ATXN2L    |
| MXI1 | BCL2      |
| MXI1 | BTG1      |
| MXI1 | CANT1     |
| MXI1 | CEBPB     |
| MXI1 | CHST15    |
| MXI1 | CNN3      |
| MXI1 | CRKL      |
| MXI1 | CXCR4     |
| MXI1 | CYB561    |
| MXI1 | DOHH      |
| MXI1 | EFCAB14   |
| MXI1 | FGR       |
| MXI1 | FOXO3     |
| MXI1 | GABARAPL1 |
| MXI1 | GALNT2    |
| MXI1 | HTATIP2   |
| MXI1 | IGFBP4    |
| MXI1 | IN080     |
| MXI1 | IP6K1     |
| MXI1 | JUNB      |
| MXI1 | KAT6B     |
| MXI1 | KDM3A     |
| MXI1 | LYST      |
| MXI1 | MAML2     |
| MXI1 | MBP       |
| MXI1 | MXI1      |
| MXI1 | NSMCE4A   |
| MXI1 | OAF       |
| MXI1 | P4HA1     |
| MXI1 | PEPD      |
| MXI1 | PICK1     |
| MXI1 | PNRC1     |
| MXI1 | RBF0X2    |
| MXI1 | RHOQ      |
| MXI1 | RNF2      |
| MXI1 | RNPEPL1   |
| MXI1 | RPS27     |
| MXI1 | SGSM2     |
| MXI1 | SIPA1L1   |
| MXI1 | SLC35C1   |

|       |           |
|-------|-----------|
| MXI1  | SLC7A7    |
| MXI1  | SMARCAD1  |
| MXI1  | TFAP4     |
| MXI1  | TGFBR1    |
| MXI1  | TGFBR2    |
| MXI1  | TNFAIP8L1 |
| MXI1  | UBL3      |
| MXI1  | VPS4A     |
| MXI1  | YBX3      |
| MYBL1 | AGBL5     |
| MYBL1 | ASPM      |
| MYBL1 | ATF2      |
| MYBL1 | BUB1B     |
| MYBL1 | CCNG2     |
| MYBL1 | CD22      |
| MYBL1 | CDC20     |
| MYBL1 | CDKN2C    |
| MYBL1 | DAAM1     |
| MYBL1 | E2F5      |
| MYBL1 | ELF1      |
| MYBL1 | EZH2      |
| MYBL1 | GCSAM     |
| MYBL1 | HRK       |
| MYBL1 | KATNAL1   |
| MYBL1 | KIF4A     |
| MYBL1 | LMNB1     |
| MYBL1 | LPP       |
| MYBL1 | PAG1      |
| MYBL1 | PLK1      |
| MYBL1 | PSIP1     |
| MYBL1 | RAD17     |
| MYBL1 | SEC14L1   |
| MYBL1 | SGO2      |
| MYBL1 | SOX5      |
| MYBL1 | SSBP2     |
| MYBL1 | SYNE2     |
| MYBL1 | TOP2A     |
| MYBL1 | WDR62     |
| MYBL1 | ZNF608    |
| MYC   | AACS      |
| MYC   | AAGAB     |
| MYC   | AAR2      |
| MYC   | AARSD1    |
| MYC   | AATF      |
| MYC   | ABCE1     |
| MYC   | ABCF1     |
| MYC   | ABHD5     |
| MYC   | ABL2      |
| MYC   | ABLIM1    |
| MYC   | ABRACL    |



|     |          |
|-----|----------|
| MYC | ABT1     |
| MYC | ABTB2    |
| MYC | ACADVL   |
| MYC | ACBD6    |
| MYC | ACP1     |
| MYC | ACTR6    |
| MYC | ADAM15   |
| MYC | ADD3     |
| MYC | ADGRE5   |
| MYC | ADK      |
| MYC | ADO      |
| MYC | ADPGK    |
| MYC | ADPRHL2  |
| MYC | ADRM1    |
| MYC | ADSL     |
| MYC | ADSS     |
| MYC | AFG3L2   |
| MYC | AGBL5    |
| MYC | AG02     |
| MYC | AHCY     |
| MYC | AHSA1    |
| MYC | AIMP1    |
| MYC | AIMP2    |
| MYC | AK6      |
| MYC | AKAP1    |
| MYC | AKIRIN1  |
| MYC | AKR1A1   |
| MYC | AKR1B1   |
| MYC | ALDH18A1 |
| MYC | ALDH1B1  |
| MYC | ALG1     |
| MYC | ALG13    |
| MYC | ALG2     |
| MYC | ALG3     |
| MYC | ALG5     |
| MYC | ALG8     |
| MYC | ALKBH2   |
| MYC | ALKBH8   |
| MYC | AMD1     |
| MYC | AMIG02   |
| MYC | AMPD2    |
| MYC | ANAPC13  |
| MYC | ANKHD1   |
| MYC | ANKMY2   |
| MYC | ANKRD11  |
| MYC | ANKRD37  |
| MYC | ANKRD46  |
| MYC | ANP32B   |
| MYC | ANXA5    |
| MYC | ANXA7    |

|     |          |
|-----|----------|
| MYC | AP1B1    |
| MYC | AP1S3    |
| MYC | AP4S1    |
| MYC | APEX1    |
| MYC | APH1A    |
| MYC | API5     |
| MYC | APMAP    |
| MYC | APP      |
| MYC | APRT     |
| MYC | APTX     |
| MYC | ARF1     |
| MYC | ARF4     |
| MYC | ARF6     |
| MYC | ARFGAP2  |
| MYC | ARFGEF1  |
| MYC | ARGLU1   |
| MYC | ARHGAP15 |
| MYC | ARHGAP24 |
| MYC | ARHGDIA  |
| MYC | ARHGEF19 |
| MYC | ARHGEF2  |
| MYC | ARL1     |
| MYC | ARL4A    |
| MYC | ARL8B    |
| MYC | ARMC1    |
| MYC | ARMC10   |
| MYC | ARMC6    |
| MYC | ARMCX1   |
| MYC | ARNTL2   |
| MYC | ARPC5L   |
| MYC | ARPP19   |
| MYC | ASB6     |
| MYC | ASNA1    |
| MYC | ASNS     |
| MYC | ASNSD1   |
| MYC | ATAD1    |
| MYC | ATAD3A   |
| MYC | ATAD3B   |
| MYC | ATF1     |
| MYC | ATF3     |
| MYC | ATF4     |
| MYC | ATG101   |
| MYC | ATG3     |
| MYC | ATG5     |
| MYC | ATIC     |
| MYC | ATL2     |
| MYC | ATL3     |
| MYC | ATN1     |
| MYC | ATOX1    |
| MYC | ATP13A1  |

|     |              |
|-----|--------------|
| MYC | ATP13A2      |
| MYC | ATP13A3      |
| MYC | ATP1A1       |
| MYC | ATP1B3       |
| MYC | ATP6AP2      |
| MYC | ATP6V0A1     |
| MYC | ATP6V0B      |
| MYC | ATP6V1B2     |
| MYC | ATP6V1F      |
| MYC | ATXN1        |
| MYC | ATXN2L       |
| MYC | AUP1         |
| MYC | AURKAIP1     |
| MYC | AVEN         |
| MYC | B3GALT6      |
| MYC | B3GAT3       |
| MYC | B3GNT2       |
| MYC | B3GNTL1      |
| MYC | B4GALT7      |
| MYC | BAG2         |
| MYC | BANF1        |
| MYC | BATF         |
| MYC | BAZ1A        |
| MYC | BBS7         |
| MYC | BCAP31       |
| MYC | BCAR3        |
| MYC | BCAS2        |
| MYC | BCAT1        |
| MYC | BCAT2        |
| MYC | BCCIP        |
| MYC | BCKDK        |
| MYC | BCL2         |
| MYC | BCL2A1       |
| MYC | BCL2L1       |
| MYC | BCL2L13      |
| MYC | BCLAF1       |
| MYC | BDP1         |
| MYC | BEND4        |
| MYC | BET1         |
| MYC | BEX2         |
| MYC | BFAR         |
| MYC | BHLHE40      |
| MYC | BLOC1S2      |
| MYC | BMPR1A       |
| MYC | BMS1         |
| MYC | BNIP2        |
| MYC | BOD1         |
| MYC | BOLA2-SMG1P6 |
| MYC | BOP1         |
| MYC | BRAF         |

|     |          |
|-----|----------|
| MYC | BRF2     |
| MYC | BRMS1    |
| MYC | BRPF1    |
| MYC | BSG      |
| MYC | BTAF1    |
| MYC | BTF3     |
| MYC | BTF3L4   |
| MYC | BTG3     |
| MYC | BTLA     |
| MYC | BUD31    |
| MYC | BYSL     |
| MYC | BZW1     |
| MYC | BZW2     |
| MYC | C11orf58 |
| MYC | C12orf29 |
| MYC | C12orf45 |
| MYC | C12orf60 |
| MYC | C17orf80 |
| MYC | C18orf25 |
| MYC | C19orf24 |
| MYC | C19orf48 |
| MYC | C19orf70 |
| MYC | C1D      |
| MYC | C1orf131 |
| MYC | C1orf159 |
| MYC | C1orf174 |
| MYC | C1orf43  |
| MYC | C1orf52  |
| MYC | C1QBP    |
| MYC | C20orf27 |
| MYC | C2orf76  |
| MYC | C4orf48  |
| MYC | C8orf33  |
| MYC | C8orf59  |
| MYC | C9orf85  |
| MYC | CA8      |
| MYC | CALM2    |
| MYC | CAMTA2   |
| MYC | CANX     |
| MYC | CAPNS1   |
| MYC | CAPRIN1  |
| MYC | CAPZA2   |
| MYC | CARNMT1  |
| MYC | CASC3    |
| MYC | CAV1     |
| MYC | CBR1     |
| MYC | CBWD1    |
| MYC | CBWD5    |
| MYC | CCDC12   |
| MYC | CCDC124  |

|     |          |
|-----|----------|
| MYC | CCDC130  |
| MYC | CCDC144A |
| MYC | CCDC47   |
| MYC | CCDC58   |
| MYC | CCDC59   |
| MYC | CCDC85B  |
| MYC | CCDC86   |
| MYC | CCDC9    |
| MYC | CCL28    |
| MYC | CCL3     |
| MYC | CCL3L1   |
| MYC | CCL4     |
| MYC | CCL4L2   |
| MYC | CCNC     |
| MYC | CCND1    |
| MYC | CCND2    |
| MYC | CCR7     |
| MYC | CCSER2   |
| MYC | CCT2     |
| MYC | CCT4     |
| MYC | CCT5     |
| MYC | CCT6A    |
| MYC | CCT7     |
| MYC | CCT8     |
| MYC | CCZ1     |
| MYC | CD151    |
| MYC | CD164    |
| MYC | CD320    |
| MYC | CD3EAP   |
| MYC | CD40     |
| MYC | CD44     |
| MYC | CD47     |
| MYC | CD63     |
| MYC | CD69     |
| MYC | CD70     |
| MYC | CD82     |
| MYC | CD83     |
| MYC | CDC123   |
| MYC | CDC23    |
| MYC | CDC37    |
| MYC | CDC37L1  |
| MYC | CDC42EP3 |
| MYC | CDC73    |
| MYC | CDIP1    |
| MYC | CDK4     |
| MYC | CDK7     |
| MYC | CDKN1B   |
| MYC | CEBPB    |
| MYC | CEBPG    |
| MYC | CEBPZ    |

|     |         |
|-----|---------|
| MYC | CELF1   |
| MYC | CENPV   |
| MYC | CEP83   |
| MYC | CERS2   |
| MYC | CERS6   |
| MYC | CFAP97  |
| MYC | CFLAR   |
| MYC | CHCHD2  |
| MYC | CHCHD3  |
| MYC | CHD1    |
| MYC | CHERP   |
| MYC | CHID1   |
| MYC | CHKA    |
| MYC | CHMP1A  |
| MYC | CHMP2B  |
| MYC | CHMP4B  |
| MYC | CHORDC1 |
| MYC | CHPF2   |
| MYC | CHST11  |
| MYC | CHSY1   |
| MYC | CHTOP   |
| MYC | CIAPIN1 |
| MYC | CIB1    |
| MYC | CIRBP   |
| MYC | CISD1   |
| MYC | CKS2    |
| MYC | CLCN7   |
| MYC | CLNS1A  |
| MYC | CLPB    |
| MYC | CLTB    |
| MYC | CLUH    |
| MYC | CMC2    |
| MYC | CMSS1   |
| MYC | CMTM6   |
| MYC | CNBP    |
| MYC | CNDP2   |
| MYC | CNIH1   |
| MYC | CN0T4   |
| MYC | CNPPD1  |
| MYC | CNPY3   |
| MYC | CNST    |
| MYC | COA4    |
| MYC | COA6    |
| MYC | COG7    |
| MYC | COIL    |
| MYC | COPRS   |
| MYC | COPS2   |
| MYC | COPS3   |
| MYC | COPS8   |
| MYC | COQ10B  |

|     |         |
|-----|---------|
| MYC | C0Q3    |
| MYC | C0Q5    |
| MYC | COX10   |
| MYC | COX17   |
| MYC | COX19   |
| MYC | COX20   |
| MYC | COX7B   |
| MYC | COX7C   |
| MYC | CPSF4   |
| MYC | CPSF7   |
| MYC | CREB5   |
| MYC | CRLS1   |
| MYC | CRNDE   |
| MYC | CRY1    |
| MYC | CRY2    |
| MYC | CSDE1   |
| MYC | CSF1    |
| MYC | CSNK2A1 |
| MYC | CSNK2B  |
| MYC | CSRNP1  |
| MYC | CTNBL1  |
| MYC | CTPS1   |
| MYC | CTR9    |
| MYC | CTSC    |
| MYC | CTU2    |
| MYC | CUL1    |
| MYC | CUL4A   |
| MYC | CWC15   |
| MYC | CWC22   |
| MYC | CWC25   |
| MYC | CWF19L1 |
| MYC | CXCR5   |
| MYC | CYB5R2  |
| MYC | CYC1    |
| MYC | CYCS    |
| MYC | CYP51A1 |
| MYC | DAP3    |
| MYC | DAPL1   |
| MYC | DARS    |
| MYC | DBR1    |
| MYC | DCAF13  |
| MYC | DCAF4   |
| MYC | DCP1A   |
| MYC | DCTD    |
| MYC | DCTN6   |
| MYC | DCTPP1  |
| MYC | DCUN1D5 |
| MYC | DDIT3   |
| MYC | DDIT4   |
| MYC | DDX1    |

|     |         |
|-----|---------|
| MYC | DDX10   |
| MYC | DDX18   |
| MYC | DDX19A  |
| MYC | DDX21   |
| MYC | DDX27   |
| MYC | DDX39A  |
| MYC | DDX3X   |
| MYC | DDX3Y   |
| MYC | DDX46   |
| MYC | DDX47   |
| MYC | DDX49   |
| MYC | DDX5    |
| MYC | DDX50   |
| MYC | DDX51   |
| MYC | DDX55   |
| MYC | DDX56   |
| MYC | DENR    |
| MYC | DESI1   |
| MYC | DGAT2   |
| MYC | DGKZ    |
| MYC | DHCR7   |
| MYC | DHRS12  |
| MYC | DHRS3   |
| MYC | DHX15   |
| MYC | DHX32   |
| MYC | DHX33   |
| MYC | DHX34   |
| MYC | DHX9    |
| MYC | DIMT1   |
| MYC | DKC1    |
| MYC | DLGAP4  |
| MYC | DLST    |
| MYC | DNAAF2  |
| MYC | DNAJA1  |
| MYC | DNAJA2  |
| MYC | DNAJB4  |
| MYC | DNAJB6  |
| MYC | DNAJC17 |
| MYC | DNAJC2  |
| MYC | DNAJC21 |
| MYC | DNAJC24 |
| MYC | DNAJC8  |
| MYC | DNPEP   |
| MYC | DNTTIP2 |
| MYC | DOHH    |
| MYC | DOT1L   |
| MYC | DPH2    |
| MYC | DPH3    |
| MYC | DPH5    |
| MYC | DPM1    |



|     |          |
|-----|----------|
| MYC | DPM2     |
| MYC | DPP7     |
| MYC | DRG1     |
| MYC | DTD1     |
| MYC | DTD2     |
| MYC | DTWD1    |
| MYC | DUS3L    |
| MYC | DUSP11   |
| MYC | DUSP12   |
| MYC | DUSP2    |
| MYC | DUSP22   |
| MYC | DUSP4    |
| MYC | DUSP5    |
| MYC | DYNC1LI1 |
| MYC | DYNLT3   |
| MYC | E2F4     |
| MYC | E2F6     |
| MYC | EBI3     |
| MYC | EBNA1BP2 |
| MYC | EBPL     |
| MYC | ECE1     |
| MYC | EDEM1    |
| MYC | EEA1     |
| MYC | EEF1A1   |
| MYC | EEF1B2   |
| MYC | EEF1E1   |
| MYC | EEF2KMT  |
| MYC | EFCAB14  |
| MYC | EGR2     |
| MYC | EGR3     |
| MYC | EHBP1L1  |
| MYC | EHD4     |
| MYC | EI24     |
| MYC | EIF1     |
| MYC | EIF1AX   |
| MYC | EIF1AY   |
| MYC | EIF1B    |
| MYC | EIF2A    |
| MYC | EIF2B1   |
| MYC | EIF2B2   |
| MYC | EIF2B3   |
| MYC | EIF2B4   |
| MYC | EIF2B5   |
| MYC | EIF2S1   |
| MYC | EIF2S2   |
| MYC | EIF3A    |
| MYC | EIF3B    |
| MYC | EIF3C    |
| MYC | EIF3E    |
| MYC | EIF3G    |

|     |              |
|-----|--------------|
| MYC | EIF3I        |
| MYC | EIF3J        |
| MYC | EIF3M        |
| MYC | EIF4A1       |
| MYC | EIF4A2       |
| MYC | EIF4A3       |
| MYC | EIF4E        |
| MYC | EIF4EBP1     |
| MYC | EIF4G1       |
| MYC | EIF4G2       |
| MYC | EIF4H        |
| MYC | EIF5         |
| MYC | EIF5A        |
| MYC | EIF5B        |
| MYC | EIF6         |
| MYC | ELAVL1       |
| MYC | ELF2         |
| MYC | ELK1         |
| MYC | ELM01        |
| MYC | ELP2         |
| MYC | ELP3         |
| MYC | ELP5         |
| MYC | EMC4         |
| MYC | EMC6         |
| MYC | EMC7         |
| MYC | EMC8         |
| MYC | EMG1         |
| MYC | EMILIN2      |
| MYC | EML4         |
| MYC | EML5         |
| MYC | EMP3         |
| MYC | EN01         |
| MYC | EN02         |
| MYC | ENOPH1       |
| MYC | ENPP4        |
| MYC | ENSA         |
| MYC | ENY2         |
| MYC | EP400        |
| MYC | EPB41L2      |
| MYC | EPB41L4A-AS1 |
| MYC | EPRS         |
| MYC | ERH          |
| MYC | ERI3         |
| MYC | ERICH1       |
| MYC | ERMARD       |
| MYC | ESC01        |
| MYC | ESF1         |
| MYC | ESRRA        |
| MYC | ETF1         |
| MYC | ETS2         |

|     |          |
|-----|----------|
| MYC | EWSR1    |
| MYC | EXOSC10  |
| MYC | EXOSC3   |
| MYC | EXOSC4   |
| MYC | EXOSC6   |
| MYC | EXOSC7   |
| MYC | EXOSC8   |
| MYC | EXT2     |
| MYC | EXTL2    |
| MYC | FAAP100  |
| MYC | FABP5    |
| MYC | FAM114A2 |
| MYC | FAM133B  |
| MYC | FAM136A  |
| MYC | FAM160A2 |
| MYC | FAM207A  |
| MYC | FAM210A  |
| MYC | FAM216A  |
| MYC | FAM234A  |
| MYC | FAM53B   |
| MYC | FAM86B1  |
| MYC | FAM86C1  |
| MYC | FAM96B   |
| MYC | FAM98A   |
| MYC | FAR1     |
| MYC | FARSA    |
| MYC | FARSB    |
| MYC | FASTK    |
| MYC | FASTKD2  |
| MYC | FBL      |
| MYC | FBXL12   |
| MYC | FBXL15   |
| MYC | FBX011   |
| MYC | FBX021   |
| MYC | FBX022   |
| MYC | FBXW11   |
| MYC | FCER2    |
| MYC | FDX1     |
| MYC | FGD5-AS1 |
| MYC | FGFBP3   |
| MYC | FGR      |
| MYC | FH       |
| MYC | FILIP1L  |
| MYC | FIP1L1   |
| MYC | FIS1     |
| MYC | FKBP4    |
| MYC | FLAD1    |
| MYC | FL0T2    |
| MYC | FOXP1    |
| MYC | FPGS     |

|     |            |
|-----|------------|
| MYC | FTH1       |
| MYC | FTSJ1      |
| MYC | FUBP1      |
| MYC | FUNDC2     |
| MYC | FUS        |
| MYC | FYN        |
| MYC | G3BP1      |
| MYC | G3BP2      |
| MYC | G6PC3      |
| MYC | G6PD       |
| MYC | GABPB1     |
| MYC | GADD45B    |
| MYC | GADD45G    |
| MYC | GADD45GIP1 |
| MYC | GALK2      |
| MYC | GALNT2     |
| MYC | GAR1       |
| MYC | GARS       |
| MYC | GART       |
| MYC | GAS7       |
| MYC | GATAD2A    |
| MYC | GCC1       |
| MYC | GCFC2      |
| MYC | GCN1       |
| MYC | GEM        |
| MYC | GEMIN4     |
| MYC | GEMIN6     |
| MYC | GFM1       |
| MYC | GGCT       |
| MYC | GHDC       |
| MYC | GHITM      |
| MYC | GL01       |
| MYC | GLRX2      |
| MYC | GLRX3      |
| MYC | GLUD1      |
| MYC | GMEB2      |
| MYC | GMFB       |
| MYC | GNAI3      |
| MYC | GNB5       |
| MYC | GNG2       |
| MYC | GNG4       |
| MYC | GNL1       |
| MYC | GNL2       |
| MYC | GNL3       |
| MYC | GNL3L      |
| MYC | GNPDA1     |
| MYC | GNPNAT1    |
| MYC | GOLGA1     |
| MYC | GOLGA7     |
| MYC | GOT1       |

|     |           |
|-----|-----------|
| MYC | GPATCH4   |
| MYC | GPN1      |
| MYC | GPR183    |
| MYC | GPR65     |
| MYC | GPR89A    |
| MYC | GPT2      |
| MYC | GPX4      |
| MYC | GRAMD1A   |
| MYC | GRIPAP1   |
| MYC | GRK5      |
| MYC | GRPEL1    |
| MYC | GRWD1     |
| MYC | GSPT1     |
| MYC | GTF2A2    |
| MYC | GTF2F2    |
| MYC | GTF2H2    |
| MYC | GTF2H2C   |
| MYC | GTF3A     |
| MYC | GTF3C6    |
| MYC | GTPBP10   |
| MYC | GTPBP3    |
| MYC | GTPBP4    |
| MYC | H3F3B     |
| MYC | HARS      |
| MYC | HAUS6     |
| MYC | HAX1      |
| MYC | HCG11     |
| MYC | HCG18     |
| MYC | HDAC2     |
| MYC | HDDC2     |
| MYC | HEATR1    |
| MYC | HECTD2    |
| MYC | HERPUD1   |
| MYC | HES1      |
| MYC | HEXB      |
| MYC | HGH1      |
| MYC | HIF1A     |
| MYC | HIGD1A    |
| MYC | HINT3     |
| MYC | HIVEP3    |
| MYC | HLA-DQB1  |
| MYC | HMBS      |
| MYC | HMGCR     |
| MYC | HMGCS1    |
| MYC | HNRNPA0   |
| MYC | HNRNPA1   |
| MYC | HNRNPA1L2 |
| MYC | HNRNPAB   |
| MYC | HNRNPC    |
| MYC | HNRNPDL   |

|     |          |
|-----|----------|
| MYC | HNRNPF   |
| MYC | HNRNPK   |
| MYC | HNRNPM   |
| MYC | HNRNPR   |
| MYC | HNRNPU   |
| MYC | HOMER1   |
| MYC | HPRT1    |
| MYC | HSD17B7  |
| MYC | HSF1     |
| MYC | HSP90AA1 |
| MYC | HSP90AB1 |
| MYC | HSPA14   |
| MYC | HSPA4    |
| MYC | HSPA8    |
| MYC | HSPA9    |
| MYC | HSPBP1   |
| MYC | HSPD1    |
| MYC | HSPE1    |
| MYC | HSPH1    |
| MYC | HYAL2    |
| MYC | HYOU1    |
| MYC | IARS     |
| MYC | ICA1     |
| MYC | ICAM1    |
| MYC | ICMT     |
| MYC | ID3      |
| MYC | IDH3A    |
| MYC | IDI1     |
| MYC | IER2     |
| MYC | IER3     |
| MYC | IER3IP1  |
| MYC | IFRD1    |
| MYC | IFRD2    |
| MYC | IFT46    |
| MYC | IFT80    |
| MYC | IGFBP4   |
| MYC | IL21R    |
| MYC | IL2RA    |
| MYC | IL2RG    |
| MYC | IL6      |
| MYC | ILF2     |
| MYC | ILF3     |
| MYC | ILVBL    |
| MYC | IMMT     |
| MYC | IMP3     |
| MYC | IMP4     |
| MYC | IMPDH1   |
| MYC | IMPDH2   |
| MYC | ING5     |
| MYC | INIP     |

|     |          |
|-----|----------|
| MYC | INSIG1   |
| MYC | INTS10   |
| MYC | INTS6    |
| MYC | INTS9    |
| MYC | IP04     |
| MYC | IP05     |
| MYC | IP07     |
| MYC | IRF5     |
| MYC | IRF8     |
| MYC | ISCA1    |
| MYC | ISG20L2  |
| MYC | ISOC2    |
| MYC | ITGA1    |
| MYC | JAGN1    |
| MYC | JAM2     |
| MYC | JAML     |
| MYC | JMJD8    |
| MYC | JOSD1    |
| MYC | JTB      |
| MYC | KANSL2   |
| MYC | KARS     |
| MYC | KAT2A    |
| MYC | KCMF1    |
| MYC | KCNG1    |
| MYC | KCTD15   |
| MYC | KDM2B    |
| MYC | KDM5C    |
| MYC | KDM6B    |
| MYC | KIAA1143 |
| MYC | KLF10    |
| MYC | KLF7     |
| MYC | KLHL18   |
| MYC | KMO      |
| MYC | KNOP1    |
| MYC | KPNA1    |
| MYC | KPNA3    |
| MYC | KPNA4    |
| MYC | KPNA6    |
| MYC | KPNB1    |
| MYC | KRI1     |
| MYC | KRR1     |
| MYC | KRTCAP2  |
| MYC | KTI12    |
| MYC | KXD1     |
| MYC | LACTB    |
| MYC | LAMP1    |
| MYC | LAMTOR3  |
| MYC | LAPTM4B  |
| MYC | LARP4    |
| MYC | LARS     |

|     |           |
|-----|-----------|
| MYC | LAS1L     |
| MYC | LASP1     |
| MYC | LAX1      |
| MYC | LCMT2     |
| MYC | LCP1      |
| MYC | LDHA      |
| MYC | LDHB      |
| MYC | LGALS3BP  |
| MYC | LIG3      |
| MYC | LINC00649 |
| MYC | LINC00662 |
| MYC | LINC00665 |
| MYC | LINS1     |
| MYC | LIPA      |
| MYC | LITAF     |
| MYC | LONP1     |
| MYC | LPCAT1    |
| MYC | LRMP      |
| MYC | LRPPRC    |
| MYC | LRRC47    |
| MYC | LRRFIP1   |
| MYC | LSM1      |
| MYC | LSM12     |
| MYC | LSM2      |
| MYC | LSM5      |
| MYC | LTA       |
| MYC | LTV1      |
| MYC | LUC7L     |
| MYC | LUC7L2    |
| MYC | LUC7L3    |
| MYC | LYAR      |
| MYC | LYN       |
| MYC | LYPLA2    |
| MYC | LYRM7     |
| MYC | LYST      |
| MYC | M6PR      |
| MYC | MACROD1   |
| MYC | MAFK      |
| MYC | MAG0H     |
| MYC | MAG0HB    |
| MYC | MALSU1    |
| MYC | MANBAL    |
| MYC | MAP2K3    |
| MYC | MAP3K13   |
| MYC | MAP3K8    |
| MYC | MAP4K5    |
| MYC | MAP7D3    |
| MYC | MAPK13    |
| MYC | MAPK1IP1L |
| MYC | MAPK6     |



|     |           |
|-----|-----------|
| MYC | MAPKAPK3  |
| MYC | MAPRE1    |
| MYC | MARCH3    |
| MYC | MARCKS    |
| MYC | MARS      |
| MYC | MAT2A     |
| MYC | MATK      |
| MYC | MBIP      |
| MYC | MCAT      |
| MYC | MCRIP1    |
| MYC | MCRIP2    |
| MYC | ME2       |
| MYC | MECR      |
| MYC | MED10     |
| MYC | MED19     |
| MYC | MED23     |
| MYC | MED28     |
| MYC | MED4      |
| MYC | MED8      |
| MYC | MEST      |
| MYC | METRN     |
| MYC | METTL1    |
| MYC | METTL13   |
| MYC | METTL21A  |
| MYC | METTL2A   |
| MYC | METTL2B   |
| MYC | METTL5    |
| MYC | METTL8    |
| MYC | MFN1      |
| MYC | MFNG      |
| MYC | MFSD2A    |
| MYC | MGAT1     |
| MYC | MICAL1    |
| MYC | MIEF1     |
| MYC | MIF       |
| MYC | MINOS1    |
| MYC | MIOS      |
| MYC | MIR155HG  |
| MYC | MIR210HG  |
| MYC | MIR3142HG |
| MYC | MLF2      |
| MYC | MLST8     |
| MYC | MLYCD     |
| MYC | MMAB      |
| MYC | MMADHC    |
| MYC | MMP7      |
| MYC | MORF4L2   |
| MYC | MPDU1     |
| MYC | MPHOSPH10 |
| MYC | MPHOSPH6  |

|     |         |
|-----|---------|
| MYC | MPP6    |
| MYC | MREG    |
| MYC | MRM1    |
| MYC | MRM3    |
| MYC | MRPL1   |
| MYC | MRPL11  |
| MYC | MRPL12  |
| MYC | MRPL13  |
| MYC | MRPL15  |
| MYC | MRPL16  |
| MYC | MRPL17  |
| MYC | MRPL19  |
| MYC | MRPL20  |
| MYC | MRPL21  |
| MYC | MRPL22  |
| MYC | MRPL23  |
| MYC | MRPL24  |
| MYC | MRPL3   |
| MYC | MRPL32  |
| MYC | MRPL36  |
| MYC | MRPL39  |
| MYC | MRPL4   |
| MYC | MRPL42  |
| MYC | MRPL44  |
| MYC | MRPL47  |
| MYC | MRPL50  |
| MYC | MRPL52  |
| MYC | MRPL54  |
| MYC | MRPL57  |
| MYC | MRPS10  |
| MYC | MRPS12  |
| MYC | MRPS15  |
| MYC | MRPS16  |
| MYC | MRPS17  |
| MYC | MRPS18C |
| MYC | MRPS2   |
| MYC | MRPS22  |
| MYC | MRPS23  |
| MYC | MRPS25  |
| MYC | MRPS26  |
| MYC | MRPS30  |
| MYC | MRPS35  |
| MYC | MRPS9   |
| MYC | MRRF    |
| MYC | MRT04   |
| MYC | MSANTD4 |
| MYC | MSM01   |
| MYC | MT1X    |
| MYC | MTAP    |
| MYC | MTF1    |

|     |         |
|-----|---------|
| MYC | MTHFD1L |
| MYC | MTHFD2  |
| MYC | MTHFD2L |
| MYC | MTIF2   |
| MYC | MTMR2   |
| MYC | MTPAP   |
| MYC | MTSS1   |
| MYC | MTX2    |
| MYC | MVP     |
| MYC | MYBBP1A |
| MYC | MYC     |
| MYC | MYO1F   |
| MYC | MYO9B   |
| MYC | NAA10   |
| MYC | NAA15   |
| MYC | NAA20   |
| MYC | NAA25   |
| MYC | NAA35   |
| MYC | NAA50   |
| MYC | NABP1   |
| MYC | NACA    |
| MYC | NAE1    |
| MYC | NAF1    |
| MYC | NAMPT   |
| MYC | NAP1L1  |
| MYC | NARS    |
| MYC | NARS2   |
| MYC | NAT10   |
| MYC | NAT9    |
| MYC | NAXE    |
| MYC | NCBP2   |
| MYC | NCF2    |
| MYC | NCL     |
| MYC | NCLN    |
| MYC | NCSTN   |
| MYC | NDFIP1  |
| MYC | NDUFA13 |
| MYC | NDUFA5  |
| MYC | NDUFAB1 |
| MYC | NDUFAF4 |
| MYC | NDUFAF6 |
| MYC | NDUFB9  |
| MYC | NDUFS6  |
| MYC | NECAP1  |
| MYC | NEDD4L  |
| MYC | NEIL2   |
| MYC | NELFE   |
| MYC | NEPRO   |
| MYC | NET01   |
| MYC | NET02   |

|     |         |
|-----|---------|
| MYC | NEU1    |
| MYC | NFE2L1  |
| MYC | NFE2L2  |
| MYC | NFKB1   |
| MYC | NFKB2   |
| MYC | NFKBIA  |
| MYC | NFKBIB  |
| MYC | NFKBID  |
| MYC | NFKBIE  |
| MYC | NFKBIZ  |
| MYC | NGDN    |
| MYC | NHP2    |
| MYC | NIFK    |
| MYC | NIN     |
| MYC | NINJ1   |
| MYC | NIP7    |
| MYC | NIPA2   |
| MYC | NIPAL4  |
| MYC | NKIRAS2 |
| MYC | NLE1    |
| MYC | NMD3    |
| MYC | NME1    |
| MYC | NOB1    |
| MYC | NOC2L   |
| MYC | NOC3L   |
| MYC | NOC4L   |
| MYC | NOL10   |
| MYC | NOL11   |
| MYC | NOL7    |
| MYC | NOL8    |
| MYC | NOL9    |
| MYC | NOLC1   |
| MYC | NOM1    |
| MYC | NOM01   |
| MYC | NOP10   |
| MYC | NOP2    |
| MYC | NOP56   |
| MYC | NOP58   |
| MYC | NORAD   |
| MYC | NPAT    |
| MYC | NPM1    |
| MYC | NPM3    |
| MYC | NPW     |
| MYC | NR1D1   |
| MYC | NR2F6   |
| MYC | NR4A1   |
| MYC | NR4A2   |
| MYC | NR4A3   |
| MYC | NRG4    |
| MYC | NRP2    |

|     |            |
|-----|------------|
| MYC | NRR0S      |
| MYC | NSA2       |
| MYC | NSUN2      |
| MYC | NSUN5      |
| MYC | NTMT1      |
| MYC | NUAK2      |
| MYC | NUBP1      |
| MYC | NUBP2      |
| MYC | NUDC       |
| MYC | NUDCD1     |
| MYC | NUDT15     |
| MYC | NUDT19     |
| MYC | NUDT4      |
| MYC | NUDT5      |
| MYC | NUDT9      |
| MYC | NUFIP1     |
| MYC | NUP107     |
| MYC | NUP160     |
| MYC | NUP35      |
| MYC | NUP54      |
| MYC | NUP58      |
| MYC | NUP62      |
| MYC | NUP93      |
| MYC | NUP98      |
| MYC | NUPL2      |
| MYC | NUS1       |
| MYC | NUTF2      |
| MYC | NUTM2B-AS1 |
| MYC | NXT1       |
| MYC | OCIAD1     |
| MYC | ODC1       |
| MYC | OGF0D1     |
| MYC | OLA1       |
| MYC | OPA1       |
| MYC | OPN3       |
| MYC | ORAI1      |
| MYC | ORMDL1     |
| MYC | ORMDL2     |
| MYC | OSTC       |
| MYC | OTUD4      |
| MYC | OTUD6B     |
| MYC | OXNAD1     |
| MYC | OXSR1      |
| MYC | P4HA1      |
| MYC | PA2G4      |
| MYC | PABPC1     |
| MYC | PABPC4     |
| MYC | PACRGL     |
| MYC | PAF1       |
| MYC | PAICS      |

|     |         |
|-----|---------|
| MYC | PAK1IP1 |
| MYC | PAK2    |
| MYC | PANX1   |
| MYC | PARK7   |
| MYC | PARL    |
| MYC | PARVB   |
| MYC | PAWR    |
| MYC | PBDC1   |
| MYC | PBXIP1  |
| MYC | PCGF5   |
| MYC | PCID2   |
| MYC | PCK2    |
| MYC | PCNP    |
| MYC | PCYT1A  |
| MYC | PDAP1   |
| MYC | PDCD10  |
| MYC | PDCD11  |
| MYC | PDCD2   |
| MYC | PDCD2L  |
| MYC | PDCD4   |
| MYC | PDCD5   |
| MYC | PDCD7   |
| MYC | PDCL3   |
| MYC | PDE12   |
| MYC | PDGFA   |
| MYC | PDHA1   |
| MYC | PDLIM2  |
| MYC | PDRG1   |
| MYC | PEA15   |
| MYC | PEF1    |
| MYC | PELO    |
| MYC | PELP1   |
| MYC | PEMT    |
| MYC | PEPD    |
| MYC | PER2    |
| MYC | PERP    |
| MYC | PES1    |
| MYC | PEX1    |
| MYC | PFDN2   |
| MYC | PFDN6   |
| MYC | PFKP    |
| MYC | PGAM1   |
| MYC | PHACTR1 |
| MYC | PHB     |
| MYC | PHB2    |
| MYC | PHF5A   |
| MYC | PHPT1   |
| MYC | PIGH    |
| MYC | PIGL    |
| MYC | PIGW    |

|     |         |
|-----|---------|
| MYC | PIKFYVE |
| MYC | PIM3    |
| MYC | PIP5K1B |
| MYC | PITHD1  |
| MYC | PITPNB  |
| MYC | PKM     |
| MYC | PLCE1   |
| MYC | PLEKHB2 |
| MYC | PLGRKT  |
| MYC | PLK3    |
| MYC | PLRG1   |
| MYC | PMAIP1  |
| MYC | PMM2    |
| MYC | PMPCB   |
| MYC | PMS1    |
| MYC | PN01    |
| MYC | PNP     |
| MYC | PNP0    |
| MYC | PNPT1   |
| MYC | POGK    |
| MYC | POLD2   |
| MYC | POLDIP2 |
| MYC | POLE3   |
| MYC | POLR1A  |
| MYC | POLR1C  |
| MYC | POLR1E  |
| MYC | POLR2C  |
| MYC | POLR2D  |
| MYC | POLR2F  |
| MYC | POLR2H  |
| MYC | POLR2I  |
| MYC | POLR2K  |
| MYC | POLR3D  |
| MYC | POLR3G  |
| MYC | POLR3H  |
| MYC | POLRMT  |
| MYC | POMP    |
| MYC | POP1    |
| MYC | POP4    |
| MYC | PPA1    |
| MYC | PPAN    |
| MYC | PPAT    |
| MYC | PPIA    |
| MYC | PPID    |
| MYC | PPIF    |
| MYC | PPIG    |
| MYC | PPIH    |
| MYC | PPIL1   |
| MYC | PPM1G   |
| MYC | PPM1M   |

|     |            |
|-----|------------|
| MYC | PPP1R11    |
| MYC | PPP1R14B   |
| MYC | PPP1R15A   |
| MYC | PPP1R2     |
| MYC | PPP2CB     |
| MYC | PPP2R2A    |
| MYC | PPP3CA     |
| MYC | PPP4R3B    |
| MYC | PPRC1      |
| MYC | PPT1       |
| MYC | PPWD1      |
| MYC | PRDX1      |
| MYC | PRELID1    |
| MYC | PRELID3B   |
| MYC | PREP       |
| MYC | PREPL      |
| MYC | PRKAB2     |
| MYC | PRKAG2-AS1 |
| MYC | PRKAR1B    |
| MYC | PRMT1      |
| MYC | PRMT3      |
| MYC | PRMT5      |
| MYC | PRNP       |
| MYC | PRPF18     |
| MYC | PRPF19     |
| MYC | PRPF31     |
| MYC | PRPF38A    |
| MYC | PRPF38B    |
| MYC | PRPF39     |
| MYC | PRPF4      |
| MYC | PRPF40A    |
| MYC | PRPF4B     |
| MYC | PRPS1      |
| MYC | PRPS2      |
| MYC | PRR3       |
| MYC | PRR7       |
| MYC | PRRC2C     |
| MYC | PRRG4      |
| MYC | PSAT1      |
| MYC | PSMA1      |
| MYC | PSMA2      |
| MYC | PSMA3      |
| MYC | PSMA4      |
| MYC | PSMA5      |
| MYC | PSMB1      |
| MYC | PSMB2      |
| MYC | PSMB5      |
| MYC | PSMB7      |
| MYC | PSMC1      |
| MYC | PSMC2      |



|     |           |
|-----|-----------|
| MYC | PSMC3     |
| MYC | PSMC4     |
| MYC | PSMC5     |
| MYC | PSMC6     |
| MYC | PSMD1     |
| MYC | PSMD11    |
| MYC | PSMD12    |
| MYC | PSMD13    |
| MYC | PSMD14    |
| MYC | PSMD2     |
| MYC | PSMD3     |
| MYC | PSMD4     |
| MYC | PSMD6     |
| MYC | PSMD7     |
| MYC | PSMD8     |
| MYC | PSME3     |
| MYC | PSMF1     |
| MYC | PSMG1     |
| MYC | PSMG4     |
| MYC | PTBP1     |
| MYC | PTGER4    |
| MYC | PTGES2    |
| MYC | PTGES3    |
| MYC | PTP4A1    |
| MYC | PTPN2     |
| MYC | PTPN6     |
| MYC | PTRH1     |
| MYC | PTRH2     |
| MYC | PUF60     |
| MYC | PUM3      |
| MYC | PUS7      |
| MYC | PWP1      |
| MYC | PYCR1     |
| MYC | PYCR2     |
| MYC | QPCTL     |
| MYC | QTRT1     |
| MYC | QTRT2     |
| MYC | RAB10     |
| MYC | RAB11FIP1 |
| MYC | RAB20     |
| MYC | RAB21     |
| MYC | RAB27A    |
| MYC | RAB28     |
| MYC | RAB7A     |
| MYC | RAB8B     |
| MYC | RABEP1    |
| MYC | RABEPK    |
| MYC | RAD23A    |
| MYC | RAD23B    |
| MYC | RAD51D    |

|     |          |
|-----|----------|
| MYC | RALA     |
| MYC | RAN      |
| MYC | RANBP1   |
| MYC | RARS     |
| MYC | RASGEF1B |
| MYC | RB1CC1   |
| MYC | RBM10    |
| MYC | RBM12    |
| MYC | RBM17    |
| MYC | RBM18    |
| MYC | RBM25    |
| MYC | RBM3     |
| MYC | RBM39    |
| MYC | RBM4     |
| MYC | RBM8A    |
| MYC | RBMX     |
| MYC | RCL1     |
| MYC | RCN1     |
| MYC | RCN2     |
| MYC | RDH13    |
| MYC | RDH14    |
| MYC | RDX      |
| MYC | REL      |
| MYC | RELL2    |
| MYC | REV3L    |
| MYC | REX01    |
| MYC | REX02    |
| MYC | REX04    |
| MYC | RFT1     |
| MYC | RFXAP    |
| MYC | RGMB     |
| MYC | RHEB     |
| MYC | RHOB     |
| MYC | RHOBTB3  |
| MYC | RHOC     |
| MYC | RHOF     |
| MYC | RHOG     |
| MYC | RILPL2   |
| MYC | RIN3     |
| MYC | RIOK1    |
| MYC | RIOK2    |
| MYC | RLIM     |
| MYC | RNASEH1  |
| MYC | RNF126   |
| MYC | RNF139   |
| MYC | RNF145   |
| MYC | RNF146   |
| MYC | RNF19A   |
| MYC | RNF2     |
| MYC | RNF220   |

|     |          |
|-----|----------|
| MYC | RNF41    |
| MYC | RNH1     |
| MYC | RNMT     |
| MYC | RNPS1    |
| MYC | RP9      |
| MYC | RPE      |
| MYC | RPF1     |
| MYC | RPF2     |
| MYC | RPIA     |
| MYC | RPL12    |
| MYC | RPL14    |
| MYC | RPL17    |
| MYC | RPL18A   |
| MYC | RPL22L1  |
| MYC | RPL23    |
| MYC | RPL24    |
| MYC | RPL26L1  |
| MYC | RPL27    |
| MYC | RPL29    |
| MYC | RPL30    |
| MYC | RPL31    |
| MYC | RPL32    |
| MYC | RPL35    |
| MYC | RPL35A   |
| MYC | RPL36    |
| MYC | RPL36AL  |
| MYC | RPL37    |
| MYC | RPL37A   |
| MYC | RPL38    |
| MYC | RPL5     |
| MYC | RPL7     |
| MYC | RPL7L1   |
| MYC | RPL9     |
| MYC | RPLP0    |
| MYC | RPLP2    |
| MYC | RPP25    |
| MYC | RPP38    |
| MYC | RPS10    |
| MYC | RPS12    |
| MYC | RPS13    |
| MYC | RPS17    |
| MYC | RPS19BP1 |
| MYC | RPS21    |
| MYC | RPS24    |
| MYC | RPS25    |
| MYC | RPS29    |
| MYC | RPS5     |
| MYC | RPS6KB1  |
| MYC | RPSA     |
| MYC | RPUSD1   |

|     |            |
|-----|------------|
| MYC | RRAGD      |
| MYC | RRP1       |
| MYC | RRP15      |
| MYC | RRP1B      |
| MYC | RRP7A      |
| MYC | RRP8       |
| MYC | RRP9       |
| MYC | RRS1       |
| MYC | RSL1D1     |
| MYC | RSL24D1    |
| MYC | RSRC2      |
| MYC | RTCB       |
| MYC | RUSC1      |
| MYC | RUVBL1     |
| MYC | RWDD1      |
| MYC | RWDD4      |
| MYC | RYK        |
| MYC | S100PBP    |
| MYC | SACS       |
| MYC | SAMD1      |
| MYC | SAMSN1     |
| MYC | SAP18      |
| MYC | SAR1A      |
| MYC | SARS       |
| MYC | SART1      |
| MYC | SBDS       |
| MYC | SBF2-AS1   |
| MYC | SCAF4      |
| MYC | SCAMP1-AS1 |
| MYC | SCAMP3     |
| MYC | SCAP       |
| MYC | SCD        |
| MYC | SCML1      |
| MYC | SC01       |
| MYC | SCRN3      |
| MYC | SDAD1      |
| MYC | SDCBP      |
| MYC | SDF4       |
| MYC | SDHAF3     |
| MYC | SDHB       |
| MYC | SEH1L      |
| MYC | SEMA7A     |
| MYC | SENP3      |
| MYC | SERBP1     |
| MYC | SERPINB8   |
| MYC | SERTAD1    |
| MYC | SESN2      |
| MYC | SET        |
| MYC | SETD6      |
| MYC | SETD7      |

|     |          |
|-----|----------|
| MYC | SF1      |
| MYC | SF3A3    |
| MYC | SF3B2    |
| MYC | SF3B3    |
| MYC | SF3B4    |
| MYC | SF3B5    |
| MYC | SF3B6    |
| MYC | SFPQ     |
| MYC | SFSWAP   |
| MYC | SGK1     |
| MYC | SGTA     |
| MYC | SH2D4A   |
| MYC | SH3BP2   |
| MYC | SHMT2    |
| MYC | SIAH2    |
| MYC | SIN3A    |
| MYC | SIPA1L1  |
| MYC | SIRPA    |
| MYC | SIRT5    |
| MYC | SLAMF1   |
| MYC | SLC12A6  |
| MYC | SLC16A1  |
| MYC | SLC16A9  |
| MYC | SLC17A9  |
| MYC | SLC19A1  |
| MYC | SLC1A5   |
| MYC | SLC25A13 |
| MYC | SLC25A17 |
| MYC | SLC25A22 |
| MYC | SLC25A25 |
| MYC | SLC25A26 |
| MYC | SLC25A3  |
| MYC | SLC25A33 |
| MYC | SLC25A39 |
| MYC | SLC25A51 |
| MYC | SLC27A4  |
| MYC | SLC29A1  |
| MYC | SLC35A2  |
| MYC | SLC35B2  |
| MYC | SLC35F5  |
| MYC | SLC38A1  |
| MYC | SLC38A2  |
| MYC | SLC38A5  |
| MYC | SLC39A1  |
| MYC | SLC39A6  |
| MYC | SLC39A8  |
| MYC | SLC3A2   |
| MYC | SLC43A3  |
| MYC | SLC4A7   |
| MYC | SLC50A1  |

|     |          |
|-----|----------|
| MYC | SLC6A9   |
| MYC | SLC7A1   |
| MYC | SLC7A5   |
| MYC | SLC9B2   |
| MYC | SLC04A1  |
| MYC | SLIRP    |
| MYC | SMARCA5  |
| MYC | SMC5     |
| MYC | SMG5     |
| MYC | SMIM10L1 |
| MYC | SMIM12   |
| MYC | SMIM15   |
| MYC | SMIM19   |
| MYC | SMIM4    |
| MYC | SMKR1    |
| MYC | SMN1     |
| MYC | SMN2     |
| MYC | SMNDC1   |
| MYC | SMS      |
| MYC | SMU1     |
| MYC | SNAPC4   |
| MYC | SNAPC5   |
| MYC | SNHG15   |
| MYC | SNHG8    |
| MYC | SNHG9    |
| MYC | SNIP1    |
| MYC | SNRNP40  |
| MYC | SNRPB    |
| MYC | SNRPB2   |
| MYC | SNRPD1   |
| MYC | SNRPD2   |
| MYC | SNRPE    |
| MYC | SNRPF    |
| MYC | SNRPG    |
| MYC | SNU13    |
| MYC | SNUPN    |
| MYC | SNW1     |
| MYC | SNX18    |
| MYC | SNX8     |
| MYC | SNX9     |
| MYC | S0CS3    |
| MYC | SOD1     |
| MYC | SOD2     |
| MYC | SON      |
| MYC | SORD     |
| MYC | SP2      |
| MYC | SPA17    |
| MYC | SPAG9    |
| MYC | SPATA2   |
| MYC | SPATA5L1 |

|     |            |
|-----|------------|
| MYC | SPHK1      |
| MYC | SPNS1      |
| MYC | SPRY1      |
| MYC | SPRYD3     |
| MYC | SPRYD4     |
| MYC | SQLE       |
| MYC | SQSTM1     |
| MYC | SREK1IP1   |
| MYC | SRFBP1     |
| MYC | SRGAP2     |
| MYC | SRGN       |
| MYC | SRI        |
| MYC | SRM        |
| MYC | SRP19      |
| MYC | SRP54      |
| MYC | SRP72      |
| MYC | SRPK1      |
| MYC | SRPRB      |
| MYC | SRRM1      |
| MYC | SRRM2      |
| MYC | SRRT       |
| MYC | SRSF1      |
| MYC | SRSF10     |
| MYC | SRSF11     |
| MYC | SRSF2      |
| MYC | SRSF3      |
| MYC | SRSF6      |
| MYC | SRSF7      |
| MYC | SSB        |
| MYC | SSBP1      |
| MYC | SSRP1      |
| MYC | SSSCA1     |
| MYC | ST13       |
| MYC | ST3GAL2    |
| MYC | ST6GALNAC3 |
| MYC | ST8SIA4    |
| MYC | STARD3NL   |
| MYC | STAT5A     |
| MYC | STAU1      |
| MYC | STIP1      |
| MYC | STK4       |
| MYC | STOML1     |
| MYC | STOML2     |
| MYC | STRAP      |
| MYC | STRIP1     |
| MYC | STX11      |
| MYC | STX18      |
| MYC | STX4       |
| MYC | STXBP3     |
| MYC | SUB1       |

|     |         |
|-----|---------|
| MYC | SUGT1   |
| MYC | SUM01   |
| MYC | SUM02   |
| MYC | SUPT16H |
| MYC | SUPV3L1 |
| MYC | SURF2   |
| MYC | SURF4   |
| MYC | SURF6   |
| MYC | SYNCRIP |
| MYC | TAF11   |
| MYC | TAF1A   |
| MYC | TAF1D   |
| MYC | TAF5L   |
| MYC | TAF9    |
| MYC | TALD01  |
| MYC | TAPBP   |
| MYC | TARBP2  |
| MYC | TARS    |
| MYC | TASP1   |
| MYC | TATDN1  |
| MYC | TBC1D24 |
| MYC | TBCA    |
| MYC | TBL3    |
| MYC | TBRG1   |
| MYC | TBRG4   |
| MYC | TCERG1  |
| MYC | TCF4    |
| MYC | TCF7    |
| MYC | TCOF1   |
| MYC | TCP1    |
| MYC | TCTN3   |
| MYC | TDG     |
| MYC | TEL02   |
| MYC | TES     |
| MYC | TEX10   |
| MYC | TFAM    |
| MYC | TFAP4   |
| MYC | TFB2M   |
| MYC | TFEC    |
| MYC | TFPI2   |
| MYC | TFRC    |
| MYC | TGDS    |
| MYC | TGIF1   |
| MYC | TGS1    |
| MYC | THAP1   |
| MYC | THAP12  |
| MYC | THAP7   |
| MYC | THOC1   |
| MYC | THOC6   |
| MYC | THUMPD2 |



|     |          |
|-----|----------|
| MYC | TIGAR    |
| MYC | TIMM10   |
| MYC | TIMM10B  |
| MYC | TIMM13   |
| MYC | TIMM17A  |
| MYC | TIMM22   |
| MYC | TIMM23   |
| MYC | TIMM23B  |
| MYC | TIMM44   |
| MYC | TIMM50   |
| MYC | TIMM8A   |
| MYC | TIMM9    |
| MYC | TLCD1    |
| MYC | TLK1     |
| MYC | TM2D3    |
| MYC | TM9SF4   |
| MYC | TMA16    |
| MYC | TMBIM1   |
| MYC | TMBIM4   |
| MYC | TMBIM6   |
| MYC | TMC01    |
| MYC | TMED2    |
| MYC | TMED3    |
| MYC | TMED4    |
| MYC | TMED9    |
| MYC | TMEM109  |
| MYC | TMEM120B |
| MYC | TMEM123  |
| MYC | TMEM126A |
| MYC | TMEM141  |
| MYC | TMEM147  |
| MYC | TMEM150A |
| MYC | TMEM165  |
| MYC | TMEM167A |
| MYC | TMEM167B |
| MYC | TMEM168  |
| MYC | TMEM170A |
| MYC | TMEM183A |
| MYC | TMEM184C |
| MYC | TMEM185B |
| MYC | TMEM192  |
| MYC | TMEM199  |
| MYC | TMEM205  |
| MYC | TMEM208  |
| MYC | TMEM216  |
| MYC | TMEM222  |
| MYC | TMEM248  |
| MYC | TMEM251  |
| MYC | TMEM259  |
| MYC | TMEM260  |

|     |          |
|-----|----------|
| MYC | TMEM267  |
| MYC | TMEM33   |
| MYC | TMEM38B  |
| MYC | TMEM39B  |
| MYC | TMEM43   |
| MYC | TMEM64   |
| MYC | TMEM70   |
| MYC | TMEM9B   |
| MYC | TMX1     |
| MYC | TMX2     |
| MYC | TMX3     |
| MYC | TNF      |
| MYC | TNFAIP1  |
| MYC | TNFAIP3  |
| MYC | TNFAIP8  |
| MYC | TNFRSF9  |
| MYC | TNIP1    |
| MYC | TNIP2    |
| MYC | TNP02    |
| MYC | TOE1     |
| MYC | TOLLIP   |
| MYC | TOMM20   |
| MYC | TOMM22   |
| MYC | TOMM34   |
| MYC | TOMM40   |
| MYC | TOMM5    |
| MYC | TOP1MT   |
| MYC | TP53BP2  |
| MYC | TRA2B    |
| MYC | TRAF1    |
| MYC | TRAF2    |
| MYC | TRAF4    |
| MYC | TRAPPC2B |
| MYC | TRAPPC4  |
| MYC | TRDMT1   |
| MYC | TRIAP1   |
| MYC | TRIB3    |
| MYC | TRIM28   |
| MYC | TRIM44   |
| MYC | TRM0     |
| MYC | TRMT1    |
| MYC | TRMT10C  |
| MYC | TRMT112  |
| MYC | TRMT6    |
| MYC | TRMT61A  |
| MYC | TRNT1    |
| MYC | TRUB1    |
| MYC | TRUB2    |
| MYC | TSC22D2  |
| MYC | TSEN15   |

|     |         |
|-----|---------|
| MYC | TSEN2   |
| MYC | TSPAN17 |
| MYC | TSPYL5  |
| MYC | TSR1    |
| MYC | TSR2    |
| MYC | TSSC4   |
| MYC | TSTA3   |
| MYC | TSTD2   |
| MYC | TTC1    |
| MYC | TTC19   |
| MYC | TTC27   |
| MYC | TTC33   |
| MYC | TTF1    |
| MYC | TTLL11  |
| MYC | TUBA1C  |
| MYC | TUBB4B  |
| MYC | TUBE1   |
| MYC | TUFM    |
| MYC | TUSC2   |
| MYC | TUT1    |
| MYC | TVP23B  |
| MYC | TWISTNB |
| MYC | TXLNG   |
| MYC | TXN     |
| MYC | TXNL1   |
| MYC | TXNL4A  |
| MYC | TXNRD1  |
| MYC | TYW3    |
| MYC | U2AF2   |
| MYC | U2SURP  |
| MYC | UAP1    |
| MYC | UBA2    |
| MYC | UBA52   |
| MYC | UBA6    |
| MYC | UBALD2  |
| MYC | UBAP2   |
| MYC | UBB     |
| MYC | UBC     |
| MYC | UBE2B   |
| MYC | UBE2D1  |
| MYC | UBE2D3  |
| MYC | UBE2G2  |
| MYC | UBE2M   |
| MYC | UBE2N   |
| MYC | UBE2Q2  |
| MYC | UBE2V2  |
| MYC | UBE2Z   |
| MYC | UBE3A   |
| MYC | UBE3D   |
| MYC | UBIAD1  |

|     |          |
|-----|----------|
| MYC | UBLCP1   |
| MYC | UBQLN1   |
| MYC | UBR1     |
| MYC | UBXN6    |
| MYC | UCHL3    |
| MYC | UCHL5    |
| MYC | UCK2     |
| MYC | UEVLD    |
| MYC | UFM1     |
| MYC | UGCG     |
| MYC | UGT8     |
| MYC | UMPS     |
| MYC | UNK      |
| MYC | UPRT     |
| MYC | UQCC2    |
| MYC | UQCRQ    |
| MYC | URI1     |
| MYC | URM1     |
| MYC | USE1     |
| MYC | USP10    |
| MYC | USP12    |
| MYC | USP14    |
| MYC | USP16    |
| MYC | USP25    |
| MYC | USP8     |
| MYC | UTP11    |
| MYC | UTP14A   |
| MYC | UTP15    |
| MYC | UTP18    |
| MYC | UTP23    |
| MYC | UTP3     |
| MYC | UTP4     |
| MYC | UTP6     |
| MYC | UVRAG    |
| MYC | UXS1     |
| MYC | UXT      |
| MYC | VAPA     |
| MYC | VARS2    |
| MYC | VCPKMT   |
| MYC | VDAC1    |
| MYC | VDAC2    |
| MYC | VEGFA    |
| MYC | VKORC1L1 |
| MYC | VLDLR    |
| MYC | VMA21    |
| MYC | VPS26A   |
| MYC | VPS37A   |
| MYC | VPS37B   |
| MYC | VPS4A    |
| MYC | VPS72    |

|     |            |
|-----|------------|
| MYC | VPS9D1-AS1 |
| MYC | VTI1B      |
| MYC | VWCE       |
| MYC | WARS       |
| MYC | WBP11      |
| MYC | WDFY1      |
| MYC | WDR12      |
| MYC | WDR25      |
| MYC | WDR3       |
| MYC | WDR4       |
| MYC | WDR43      |
| MYC | WDR45B     |
| MYC | WDR46      |
| MYC | WDR5       |
| MYC | WDR55      |
| MYC | WDR59      |
| MYC | WDR70      |
| MYC | WDR74      |
| MYC | WDR75      |
| MYC | WDR77      |
| MYC | WDR82      |
| MYC | WDR830S    |
| MYC | WDR91      |
| MYC | WIZ        |
| MYC | WRN        |
| MYC | WSB2       |
| MYC | WTAP       |
| MYC | XAB2       |
| MYC | XP01       |
| MYC | XP04       |
| MYC | XP06       |
| MYC | XP0T       |
| MYC | XRCC5      |
| MYC | XRCC6      |
| MYC | XRN2       |
| MYC | XXYLT1     |
| MYC | YARS       |
| MYC | YBX1       |
| MYC | YBX3       |
| MYC | YIF1A      |
| MYC | YIPF4      |
| MYC | YKT6       |
| MYC | YLPM1      |
| MYC | YRDC       |
| MYC | YTHDF2     |
| MYC | YWHAE      |
| MYC | YWHAG      |
| MYC | YWHAQ      |
| MYC | ZAP70      |
| MYC | ZBED3-AS1  |

|        |            |
|--------|------------|
| MYC    | ZBTB11-AS1 |
| MYC    | ZBTB2      |
| MYC    | ZBTB24     |
| MYC    | ZC3H12A    |
| MYC    | ZC3H15     |
| MYC    | ZC3H8      |
| MYC    | ZCCHC4     |
| MYC    | ZFAND5     |
| MYC    | ZFAS1      |
| MYC    | ZFP36L1    |
| MYC    | ZFP91      |
| MYC    | ZFYVE9     |
| MYC    | ZHX1       |
| MYC    | ZMAT2      |
| MYC    | ZMPSTE24   |
| MYC    | ZMYND11    |
| MYC    | ZNF131     |
| MYC    | ZNF146     |
| MYC    | ZNF22      |
| MYC    | ZNF263     |
| MYC    | ZNF267     |
| MYC    | ZNF322     |
| MYC    | ZNF330     |
| MYC    | ZNF426     |
| MYC    | ZNF480     |
| MYC    | ZNF485     |
| MYC    | ZNF511     |
| MYC    | ZNF526     |
| MYC    | ZNF567     |
| MYC    | ZNF593     |
| MYC    | ZNF667     |
| MYC    | ZNF706     |
| MYC    | ZNF746     |
| MYC    | ZNF75A     |
| MYC    | ZNF770     |
| MYC    | ZNF835     |
| MYC    | ZNF85      |
| MYC    | ZNFX1      |
| MYC    | ZNHIT6     |
| MYC    | ZPR1       |
| MYC    | ZRANB2     |
| MYC    | ZSCAN21    |
| MYC    | ZSCAN9     |
| MYC    | ZSWIM7     |
| NFATC1 | ABRACL     |
| NFATC1 | ARHGEF12   |
| NFATC1 | BCL2A1     |
| NFATC1 | BCL2L1     |
| NFATC1 | BLNK       |
| NFATC1 | CCDC88A    |

|        |          |
|--------|----------|
| NFATC1 | CD83     |
| NFATC1 | EIF5A    |
| NFATC1 | FCRL3    |
| NFATC1 | HES1     |
| NFATC1 | HIVEP3   |
| NFATC1 | IGF2BP3  |
| NFATC1 | MAP3K8   |
| NFATC1 | NFATC1   |
| NFATC1 | NFKBID   |
| NFATC1 | NIN      |
| NFATC1 | PHF6     |
| NFATC1 | PIM1     |
| NFATC1 | PPAN     |
| NFATC1 | PTPRE    |
| NFATC1 | RILPL2   |
| NFATC1 | SAMSN1   |
| NFATC1 | SDCBP    |
| NFATC1 | SLC38A1  |
| NFATC1 | SSTR2    |
| NFATC1 | TESPA1   |
| NFATC1 | TGIF1    |
| NFATC1 | TLE1     |
| NFATC1 | UBALD2   |
| NFE2L1 | ANXA7    |
| NFE2L1 | ATP1A1   |
| NFE2L1 | DNPEP    |
| NFE2L1 | EMP3     |
| NFE2L1 | ENO1     |
| NFE2L1 | FTH1     |
| NFE2L1 | GHITM    |
| NFE2L1 | HSP90AB1 |
| NFE2L1 | HSPA9    |
| NFE2L1 | LMNA     |
| NFE2L1 | MIR155HG |
| NFE2L1 | NCL      |
| NFE2L1 | NFE2L2   |
| NFE2L1 | PSMA1    |
| NFE2L1 | PSMD11   |
| NFE2L1 | PSMD14   |
| NFE2L1 | RHOF     |
| NFE2L1 | SLC1A5   |
| NFE2L1 | SLC3A2   |
| NFE2L1 | SQSTM1   |
| NFE2L1 | TES      |
| NFE2L1 | TFEC     |
| NFE2L1 | TRIB3    |
| NFE2L1 | TXN      |
| NFE2L1 | TXNL1    |
| NFE2L1 | UCK2     |
| NFE2L2 | AARS     |

|        |          |
|--------|----------|
| NFE2L2 | AASDHPPT |
| NFE2L2 | ABCE1    |
| NFE2L2 | ABCF1    |
| NFE2L2 | ABT1     |
| NFE2L2 | ACOT9    |
| NFE2L2 | ADNP2    |
| NFE2L2 | ADPGK    |
| NFE2L2 | AKIRIN1  |
| NFE2L2 | AKTIP    |
| NFE2L2 | ALG13    |
| NFE2L2 | AMD1     |
| NFE2L2 | ANKRD11  |
| NFE2L2 | AP2B1    |
| NFE2L2 | AP5Z1    |
| NFE2L2 | APBB1    |
| NFE2L2 | APEX1    |
| NFE2L2 | ARHGEF12 |
| NFE2L2 | ARPP19   |
| NFE2L2 | ASAH1    |
| NFE2L2 | ASNS     |
| NFE2L2 | ATF4     |
| NFE2L2 | ATG5     |
| NFE2L2 | ATP11B   |
| NFE2L2 | ATP1B3   |
| NFE2L2 | BCAS2    |
| NFE2L2 | BDP1     |
| NFE2L2 | BTG1     |
| NFE2L2 | BUD31    |
| NFE2L2 | C19orf70 |
| NFE2L2 | C1orf174 |
| NFE2L2 | C2orf49  |
| NFE2L2 | C2orf69  |
| NFE2L2 | C6orf99  |
| NFE2L2 | CAMK1    |
| NFE2L2 | CARS     |
| NFE2L2 | CCDC59   |
| NFE2L2 | CCL4L2   |
| NFE2L2 | CCND1    |
| NFE2L2 | CCND2    |
| NFE2L2 | CCNL1    |
| NFE2L2 | CCT2     |
| NFE2L2 | CCT4     |
| NFE2L2 | CDC25C   |
| NFE2L2 | CDK4     |
| NFE2L2 | CEBPB    |
| NFE2L2 | CEBPG    |
| NFE2L2 | CEBPZ    |
| NFE2L2 | CFLAR    |
| NFE2L2 | CHAC1    |
| NFE2L2 | CHD1     |



|        |          |
|--------|----------|
| NFE2L2 | CIRBP    |
| NFE2L2 | CMSS1    |
| NFE2L2 | CNOT7    |
| NFE2L2 | COMMD1   |
| NFE2L2 | CSNK1D   |
| NFE2L2 | CTNNA1   |
| NFE2L2 | CTU2     |
| NFE2L2 | CWC25    |
| NFE2L2 | CYCS     |
| NFE2L2 | DCTD     |
| NFE2L2 | DDIT3    |
| NFE2L2 | DDX10    |
| NFE2L2 | DDX18    |
| NFE2L2 | DDX28    |
| NFE2L2 | DDX5     |
| NFE2L2 | DNAJA2   |
| NFE2L2 | DNPEP    |
| NFE2L2 | DNTTIP2  |
| NFE2L2 | DPM1     |
| NFE2L2 | DUSP2    |
| NFE2L2 | DXO      |
| NFE2L2 | DYNC1I2  |
| NFE2L2 | E4F1     |
| NFE2L2 | EBF1     |
| NFE2L2 | EGR3     |
| NFE2L2 | EIF1     |
| NFE2L2 | EIF4A1   |
| NFE2L2 | EIF4A2   |
| NFE2L2 | ELL2     |
| NFE2L2 | ELP5     |
| NFE2L2 | ETF1     |
| NFE2L2 | ETV6     |
| NFE2L2 | FAM234A  |
| NFE2L2 | FAM50A   |
| NFE2L2 | FBL      |
| NFE2L2 | FGFR1    |
| NFE2L2 | FOXP1    |
| NFE2L2 | GAR1     |
| NFE2L2 | GARS     |
| NFE2L2 | GHITM    |
| NFE2L2 | GNL1     |
| NFE2L2 | GNL2     |
| NFE2L2 | GOT1     |
| NFE2L2 | GPBP1    |
| NFE2L2 | GPER1    |
| NFE2L2 | GTPBP10  |
| NFE2L2 | GTSF1    |
| NFE2L2 | HNRNPA3  |
| NFE2L2 | HNRNPU   |
| NFE2L2 | HSP90AB1 |

|        |            |
|--------|------------|
| NFE2L2 | HSPA9      |
| NFE2L2 | IARS       |
| NFE2L2 | ID3        |
| NFE2L2 | IER2       |
| NFE2L2 | ILF3       |
| NFE2L2 | IMPDH2     |
| NFE2L2 | INSIG1     |
| NFE2L2 | IRF4       |
| NFE2L2 | ISCA1      |
| NFE2L2 | KDM2A      |
| NFE2L2 | KDM6B      |
| NFE2L2 | KIAA1143   |
| NFE2L2 | LAMP1      |
| NFE2L2 | LANCL2     |
| NFE2L2 | LAPTM4A    |
| NFE2L2 | LARP7      |
| NFE2L2 | LARS       |
| NFE2L2 | LDHA       |
| NFE2L2 | LIMK1      |
| NFE2L2 | MAFG       |
| NFE2L2 | MAFK       |
| NFE2L2 | MAGOH      |
| NFE2L2 | MAGOHB     |
| NFE2L2 | MAPRE1     |
| NFE2L2 | MBNL3      |
| NFE2L2 | MCRIP1     |
| NFE2L2 | MIF        |
| NFE2L2 | MIR181A1HG |
| NFE2L2 | MRPL1      |
| NFE2L2 | MRPS17     |
| NFE2L2 | MRPS18B    |
| NFE2L2 | MRRF       |
| NFE2L2 | NABP1      |
| NFE2L2 | NAMPT      |
| NFE2L2 | NCBP2      |
| NFE2L2 | NDRG4      |
| NFE2L2 | NECAP1     |
| NFE2L2 | NELFE      |
| NFE2L2 | NFE2L2     |
| NFE2L2 | NFKB1      |
| NFE2L2 | NFKB2      |
| NFE2L2 | NFYB       |
| NFE2L2 | NIPA2      |
| NFE2L2 | NOC4L      |
| NFE2L2 | NOLC1      |
| NFE2L2 | NOP58      |
| NFE2L2 | NR4A2      |
| NFE2L2 | NUP133     |
| NFE2L2 | NUP155     |
| NFE2L2 | NUP214     |

|        |          |
|--------|----------|
| NFE2L2 | NUP93    |
| NFE2L2 | OCIAD1   |
| NFE2L2 | OTUD4    |
| NFE2L2 | PABPC1   |
| NFE2L2 | PAK1IP1  |
| NFE2L2 | PARD6A   |
| NFE2L2 | PCK2     |
| NFE2L2 | PCM1     |
| NFE2L2 | PELO     |
| NFE2L2 | PEPD     |
| NFE2L2 | PFDN2    |
| NFE2L2 | PHACTR1  |
| NFE2L2 | PIM3     |
| NFE2L2 | PLRG1    |
| NFE2L2 | PMAIP1   |
| NFE2L2 | POLR2H   |
| NFE2L2 | POP4     |
| NFE2L2 | PPIG     |
| NFE2L2 | PPP1R15A |
| NFE2L2 | PRMT1    |
| NFE2L2 | PRNP     |
| NFE2L2 | PRPF38B  |
| NFE2L2 | PRRC2C   |
| NFE2L2 | PSMD14   |
| NFE2L2 | PTP4A1   |
| NFE2L2 | PUM3     |
| NFE2L2 | PWP1     |
| NFE2L2 | PYCR1    |
| NFE2L2 | QTRT1    |
| NFE2L2 | RAB21    |
| NFE2L2 | RAB27A   |
| NFE2L2 | RAD23A   |
| NFE2L2 | RAD23B   |
| NFE2L2 | RALA     |
| NFE2L2 | RALGAPA1 |
| NFE2L2 | RBM25    |
| NFE2L2 | RCC1     |
| NFE2L2 | REL      |
| NFE2L2 | RELB     |
| NFE2L2 | RHEB     |
| NFE2L2 | RING1    |
| NFE2L2 | RNH1     |
| NFE2L2 | RNPS1    |
| NFE2L2 | RPA2     |
| NFE2L2 | RPL38    |
| NFE2L2 | RPL9     |
| NFE2L2 | RPLP2    |
| NFE2L2 | RPS29    |
| NFE2L2 | RRNAD1   |
| NFE2L2 | RRP1     |

|        |          |
|--------|----------|
| NFE2L2 | RRP1B    |
| NFE2L2 | RSL24D1  |
| NFE2L2 | RTN4     |
| NFE2L2 | SBDS     |
| NFE2L2 | SDE2     |
| NFE2L2 | SEPT7    |
| NFE2L2 | SF1      |
| NFE2L2 | SH2B3    |
| NFE2L2 | SH3RF1   |
| NFE2L2 | SHMT2    |
| NFE2L2 | SLC25A33 |
| NFE2L2 | SLC38A1  |
| NFE2L2 | SLC3A2   |
| NFE2L2 | SLC7A1   |
| NFE2L2 | SMARCA5  |
| NFE2L2 | SMNDC1   |
| NFE2L2 | SNHG15   |
| NFE2L2 | SNX11    |
| NFE2L2 | SPG21    |
| NFE2L2 | SQSTM1   |
| NFE2L2 | SREBF1   |
| NFE2L2 | SRRM1    |
| NFE2L2 | SRSF3    |
| NFE2L2 | SSSCA1   |
| NFE2L2 | ST13     |
| NFE2L2 | STK19    |
| NFE2L2 | STK4     |
| NFE2L2 | TBC1D22A |
| NFE2L2 | TBL3     |
| NFE2L2 | THOC1    |
| NFE2L2 | TMEM120B |
| NFE2L2 | TMEM126B |
| NFE2L2 | TMEM147  |
| NFE2L2 | TMEM175  |
| NFE2L2 | TMF1     |
| NFE2L2 | TMTC4    |
| NFE2L2 | TNFAIP3  |
| NFE2L2 | TRA2A    |
| NFE2L2 | TRA2B    |
| NFE2L2 | TRAF4    |
| NFE2L2 | TRAP1    |
| NFE2L2 | TRIB3    |
| NFE2L2 | TRPS1    |
| NFE2L2 | TTC1     |
| NFE2L2 | TXNL1    |
| NFE2L2 | UBAP2    |
| NFE2L2 | UBB      |
| NFE2L2 | UBC      |
| NFE2L2 | UBE2B    |
| NFE2L2 | UBE2Z    |

|        |         |
|--------|---------|
| NFE2L2 | UMPS    |
| NFE2L2 | USP14   |
| NFE2L2 | UTP15   |
| NFE2L2 | VPS37B  |
| NFE2L2 | WBP11   |
| NFE2L2 | XRCC6   |
| NFE2L2 | XRN2    |
| NFE2L2 | YTHDC1  |
| NFE2L2 | ZBTB2   |
| NFE2L2 | ZFP36L1 |
| NFE2L2 | ZFY     |
| NFE2L2 | ZHX2    |
| NFE2L2 | ZNF131  |
| NFE2L2 | ZNF146  |
| NFE2L2 | ZNF281  |
| NFE2L2 | ZNF330  |
| NFE2L2 | ZNF706  |
| NFE2L2 | ZNRD1   |
| NFIC   | EEF1B2  |
| NFKB1  | ABCE1   |
| NFKB1  | ABTB2   |
| NFKB1  | BATF3   |
| NFKB1  | BCL2    |
| NFKB1  | BCL2A1  |
| NFKB1  | BCL2L1  |
| NFKB1  | BOD1    |
| NFKB1  | BTLA    |
| NFKB1  | CCND2   |
| NFKB1  | CCR7    |
| NFKB1  | CD40    |
| NFKB1  | CD44    |
| NFKB1  | CD82    |
| NFKB1  | CD83    |
| NFKB1  | CD86    |
| NFKB1  | CFLAR   |
| NFKB1  | CHMP4B  |
| NFKB1  | CMTM6   |
| NFKB1  | CREM    |
| NFKB1  | CSF1    |
| NFKB1  | DLGAP4  |
| NFKB1  | DNPEP   |
| NFKB1  | DUSP5   |
| NFKB1  | EBI3    |
| NFKB1  | ECE1    |
| NFKB1  | ENO1    |
| NFKB1  | EPB41L2 |
| NFKB1  | FOXK1   |
| NFKB1  | FOXP1   |
| NFKB1  | G3BP1   |
| NFKB1  | GALNT2  |

|       |          |
|-------|----------|
| NFKB1 | GNG4     |
| NFKB1 | HEXIM1   |
| NFKB1 | IFRD1    |
| NFKB1 | IL21R    |
| NFKB1 | IL2RA    |
| NFKB1 | IRF2BPL  |
| NFKB1 | KDM6B    |
| NFKB1 | KRBA1    |
| NFKB1 | MAML2    |
| NFKB1 | MAP4     |
| NFKB1 | MARCKS   |
| NFKB1 | MDFIC    |
| NFKB1 | MIR155HG |
| NFKB1 | NCF2     |
| NFKB1 | NCK2     |
| NFKB1 | NDUFAF4  |
| NFKB1 | NFATC2   |
| NFKB1 | NFE2L1   |
| NFKB1 | NFKB1    |
| NFKB1 | NFKB2    |
| NFKB1 | NFKBIA   |
| NFKB1 | NFKBIB   |
| NFKB1 | NOC2L    |
| NFKB1 | NRP2     |
| NFKB1 | NRR05    |
| NFKB1 | NUP93    |
| NFKB1 | ODC1     |
| NFKB1 | PCK2     |
| NFKB1 | PDCD4    |
| NFKB1 | PMAIP1   |
| NFKB1 | PSMA1    |
| NFKB1 | PTGER4   |
| NFKB1 | REL      |
| NFKB1 | RHOF     |
| NFKB1 | RHOG     |
| NFKB1 | RNF2     |
| NFKB1 | SAV1     |
| NFKB1 | SIRPA    |
| NFKB1 | SLAMF1   |
| NFKB1 | SLC39A1  |
| NFKB1 | SLC7A1   |
| NFKB1 | SLC05A1  |
| NFKB1 | SNX11    |
| NFKB1 | STAT5A   |
| NFKB1 | TFEC     |
| NFKB1 | TNFAIP8  |
| NFKB1 | TNFRSF9  |
| NFKB1 | TNIP2    |
| NFKB1 | TRAF1    |
| NFKB1 | TRAF3    |

|       |          |
|-------|----------|
| NFKB1 | ZBTB10   |
| NFKB1 | ZHX1     |
| NFKB2 | ABCF1    |
| NFKB2 | ABTB2    |
| NFKB2 | ADCY3    |
| NFKB2 | ADGRE5   |
| NFKB2 | ADGRG5   |
| NFKB2 | AEN      |
| NFKB2 | AGFG1    |
| NFKB2 | AMMECR1L |
| NFKB2 | AMPD3    |
| NFKB2 | ANXA7    |
| NFKB2 | APPL1    |
| NFKB2 | ARHGAP24 |
| NFKB2 | ARHGAP25 |
| NFKB2 | ARID5A   |
| NFKB2 | ASAP1    |
| NFKB2 | ATAD2B   |
| NFKB2 | ATF3     |
| NFKB2 | ATP2B1   |
| NFKB2 | B2M      |
| NFKB2 | BASP1    |
| NFKB2 | BATF     |
| NFKB2 | BCL2     |
| NFKB2 | BCL2A1   |
| NFKB2 | BCL2L1   |
| NFKB2 | BID      |
| NFKB2 | BIRC3    |
| NFKB2 | BNIP1    |
| NFKB2 | C12orf29 |
| NFKB2 | C12orf42 |
| NFKB2 | C6orf48  |
| NFKB2 | CA8      |
| NFKB2 | CAMTA2   |
| NFKB2 | CAV1     |
| NFKB2 | CBX6     |
| NFKB2 | CCDC28B  |
| NFKB2 | CCDC50   |
| NFKB2 | CCDC58   |
| NFKB2 | CCND1    |
| NFKB2 | CCR7     |
| NFKB2 | CCSER2   |
| NFKB2 | CD40     |
| NFKB2 | CD44     |
| NFKB2 | CD58     |
| NFKB2 | CD82     |
| NFKB2 | CD83     |
| NFKB2 | CD86     |
| NFKB2 | CDC42SE1 |
| NFKB2 | CEBPG    |

|       |          |
|-------|----------|
| NFKB2 | CFLAR    |
| NFKB2 | CHMP4B   |
| NFKB2 | CIRBP    |
| NFKB2 | CMTM6    |
| NFKB2 | CREM     |
| NFKB2 | CSNK2A2  |
| NFKB2 | CYB561   |
| NFKB2 | CYB5A    |
| NFKB2 | CYLD     |
| NFKB2 | CYTH1    |
| NFKB2 | DGAT2    |
| NFKB2 | DHX40    |
| NFKB2 | DNAJB14  |
| NFKB2 | DNPEP    |
| NFKB2 | DPH2     |
| NFKB2 | DUSP10   |
| NFKB2 | DYNLT3   |
| NFKB2 | EBI3     |
| NFKB2 | ECE1     |
| NFKB2 | EMP3     |
| NFKB2 | EPSTI1   |
| NFKB2 | FAM84B   |
| NFKB2 | FBRS     |
| NFKB2 | FNBP1    |
| NFKB2 | FOXP1    |
| NFKB2 | GAB1     |
| NFKB2 | GADD45B  |
| NFKB2 | GALNT2   |
| NFKB2 | GNG2     |
| NFKB2 | GNG4     |
| NFKB2 | GNL2     |
| NFKB2 | GPBP1    |
| NFKB2 | HCK      |
| NFKB2 | HLA-A    |
| NFKB2 | HLA-B    |
| NFKB2 | HLA-DQA1 |
| NFKB2 | HLA-E    |
| NFKB2 | HLA-F    |
| NFKB2 | ICAM1    |
| NFKB2 | IERS     |
| NFKB2 | IFIH1    |
| NFKB2 | IFRD1    |
| NFKB2 | IGF2R    |
| NFKB2 | IKBKE    |
| NFKB2 | IL15     |
| NFKB2 | IL21R    |
| NFKB2 | IL2RG    |
| NFKB2 | IMMP2L   |
| NFKB2 | IN080    |
| NFKB2 | KATNA1   |



|       |           |
|-------|-----------|
| NFKB2 | KLF10     |
| NFKB2 | KLHL18    |
| NFKB2 | KLHL36    |
| NFKB2 | KMT2E     |
| NFKB2 | KYNU      |
| NFKB2 | LENG8     |
| NFKB2 | LINC00158 |
| NFKB2 | LINC00926 |
| NFKB2 | LIPE      |
| NFKB2 | LITAF     |
| NFKB2 | LMNA      |
| NFKB2 | LTA       |
| NFKB2 | LYST      |
| NFKB2 | MAFG      |
| NFKB2 | MAP3K8    |
| NFKB2 | MAPKAPK5  |
| NFKB2 | MARCKS    |
| NFKB2 | MDFIC     |
| NFKB2 | MED15     |
| NFKB2 | MGLL      |
| NFKB2 | MIR155HG  |
| NFKB2 | MREG      |
| NFKB2 | MY01C     |
| NFKB2 | NAMPT     |
| NFKB2 | NBPF20    |
| NFKB2 | NCF2      |
| NFKB2 | NEMF      |
| NFKB2 | NFE2L1    |
| NFKB2 | NFE2L2    |
| NFKB2 | NFKB1     |
| NFKB2 | NFKB2     |
| NFKB2 | NFKBIA    |
| NFKB2 | NFKBIB    |
| NFKB2 | NFKBID    |
| NFKB2 | NFKBIE    |
| NFKB2 | NKRF      |
| NFKB2 | NOC2L     |
| NFKB2 | NOC3L     |
| NFKB2 | NOL11     |
| NFKB2 | NR4A2     |
| NFKB2 | NRR05     |
| NFKB2 | NXT1      |
| NFKB2 | OGFOD3    |
| NFKB2 | PAK1IP1   |
| NFKB2 | PANX1     |
| NFKB2 | PARP14    |
| NFKB2 | PATL1     |
| NFKB2 | PHF1      |
| NFKB2 | PIGH      |
| NFKB2 | PLAG1     |

|       |          |
|-------|----------|
| NFKB2 | PLCE1    |
| NFKB2 | PMAIP1   |
| NFKB2 | POMC     |
| NFKB2 | PPAN     |
| NFKB2 | PPP1R15A |
| NFKB2 | PPTC7    |
| NFKB2 | PRNP     |
| NFKB2 | PRRC2C   |
| NFKB2 | PSMA6    |
| NFKB2 | PVT1     |
| NFKB2 | RAB27A   |
| NFKB2 | RALGPS1  |
| NFKB2 | RBM17    |
| NFKB2 | RDH14    |
| NFKB2 | RDX      |
| NFKB2 | REL      |
| NFKB2 | RELB     |
| NFKB2 | RFTN1    |
| NFKB2 | RHOF     |
| NFKB2 | RHOG     |
| NFKB2 | RHOV     |
| NFKB2 | RILPL2   |
| NFKB2 | RNASEK   |
| NFKB2 | RNF114   |
| NFKB2 | RNF145   |
| NFKB2 | RPL22L1  |
| NFKB2 | RUNX3    |
| NFKB2 | SAMSN1   |
| NFKB2 | SBF2-AS1 |
| NFKB2 | SDCBP    |
| NFKB2 | SEMA7A   |
| NFKB2 | SH2B3    |
| NFKB2 | SIPA1L1  |
| NFKB2 | SLC25A37 |
| NFKB2 | SLC35F2  |
| NFKB2 | SLC38A1  |
| NFKB2 | SLC3A2   |
| NFKB2 | SLC50A1  |
| NFKB2 | SMG9     |
| NFKB2 | SNHG7    |
| NFKB2 | SNX11    |
| NFKB2 | SNX9     |
| NFKB2 | SPIB     |
| NFKB2 | SQSTM1   |
| NFKB2 | SRGN     |
| NFKB2 | ST20     |
| NFKB2 | STAT5A   |
| NFKB2 | TAGLN2   |
| NFKB2 | TARS     |
| NFKB2 | TBC1D10A |

|       |          |
|-------|----------|
| NFKB2 | TCF7     |
| NFKB2 | TFEB     |
| NFKB2 | THUMPD2  |
| NFKB2 | TM2D3    |
| NFKB2 | TMEM120A |
| NFKB2 | TMEM123  |
| NFKB2 | TNFAIP8  |
| NFKB2 | TNFRSF18 |
| NFKB2 | TNFRSF4  |
| NFKB2 | TNIP1    |
| NFKB2 | TNIP2    |
| NFKB2 | TOMM40L  |
| NFKB2 | TRAF1    |
| NFKB2 | TRAF2    |
| NFKB2 | TRAF3    |
| NFKB2 | TRAF4    |
| NFKB2 | TRIP10   |
| NFKB2 | TRMT61A  |
| NFKB2 | TWISTNB  |
| NFKB2 | UBAC2    |
| NFKB2 | UNC119   |
| NFKB2 | UQCC1    |
| NFKB2 | USP12    |
| NFKB2 | VASP     |
| NFKB2 | VOPP1    |
| NFKB2 | VWCE     |
| NFKB2 | WDR13    |
| NFKB2 | XPOT     |
| NFKB2 | YAF2     |
| NFKB2 | YARS     |
| NFKB2 | ZBTB10   |
| NFKB2 | ZBTB32   |
| NFKB2 | ZC3H12A  |
| NFKB2 | ZFAS1    |
| NFKB2 | ZFP36L1  |
| NFKB2 | ZNF264   |
| NFKB2 | ZNF385C  |
| NFKB2 | ZNF587B  |
| NFYA  | ACADS    |
| NFYA  | ACADSB   |
| NFYA  | ADGRE5   |
| NFYA  | ANXA2    |
| NFYA  | ARHGEF3  |
| NFYA  | ARL2BP   |
| NFYA  | ARMC1    |
| NFYA  | ARMC10   |
| NFYA  | BATF     |
| NFYA  | BLOC1S5  |
| NFYA  | BLZF1    |
| NFYA  | BZW2     |

|      |          |
|------|----------|
| NFYA | C12orf42 |
| NFYA | CA2      |
| NFYA | CD151    |
| NFYA | CD44     |
| NFYA | CHDH     |
| NFYA | CHKB     |
| NFYA | CHST11   |
| NFYA | CLCF1    |
| NFYA | CMIP     |
| NFYA | CN0T9    |
| NFYA | COPRS    |
| NFYA | DOCK9    |
| NFYA | DSCC1    |
| NFYA | EIF2AK3  |
| NFYA | GM2A     |
| NFYA | GON4L    |
| NFYA | GRK3     |
| NFYA | HACD4    |
| NFYA | HBP1     |
| NFYA | HIST1H1D |
| NFYA | HSPBP1   |
| NFYA | IFNGR1   |
| NFYA | IL6      |
| NFYA | ING5     |
| NFYA | IP04     |
| NFYA | IQSEC1   |
| NFYA | ISYNA1   |
| NFYA | KCNK6    |
| NFYA | KIAA0040 |
| NFYA | LGALS3   |
| NFYA | LIMS1    |
| NFYA | LIX1L    |
| NFYA | MDM1     |
| NFYA | MFSD3    |
| NFYA | MKNK2    |
| NFYA | MLLT1    |
| NFYA | MORC2    |
| NFYA | NCBP1    |
| NFYA | NEK6     |
| NFYA | NEMP1    |
| NFYA | NF2      |
| NFYA | NFYA     |
| NFYA | NIT1     |
| NFYA | NT5C3A   |
| NFYA | ORMDL3   |
| NFYA | OTUD1    |
| NFYA | PDE4DIP  |
| NFYA | PEA15    |
| NFYA | PIKFYVE  |
| NFYA | PITPNA   |

|      |           |
|------|-----------|
| NFYA | PLEKHG1   |
| NFYA | PML       |
| NFYA | PPP3CA    |
| NFYA | PSMC3IP   |
| NFYA | RAB13     |
| NFYA | RAD18     |
| NFYA | RCN1      |
| NFYA | RGL2      |
| NFYA | RHOC      |
| NFYA | RPP40     |
| NFYA | RSPH1     |
| NFYA | SEMA7A    |
| NFYA | SH2B3     |
| NFYA | SIN3B     |
| NFYA | SLC16A1   |
| NFYA | SMNDC1    |
| NFYA | SNX22     |
| NFYA | SP3       |
| NFYA | STARD3NL  |
| NFYA | STAT5A    |
| NFYA | SYT17     |
| NFYA | TBC1D15   |
| NFYA | TBCB      |
| NFYA | TCF3      |
| NFYA | TFRC      |
| NFYA | TMBIM1    |
| NFYA | TMEM106C  |
| NFYA | TMEM50B   |
| NFYA | TNFRSF12A |
| NFYA | TNIP2     |
| NFYA | TNP02     |
| NFYA | TOR1B     |
| NFYA | TRIP10    |
| NFYA | TUBA1A    |
| NFYA | UBASH3B   |
| NFYA | USB1      |
| NFYA | USP12     |
| NFYA | USP36     |
| NFYA | ZHX1      |
| NFYA | ZNF563    |
| NFYA | ZNF652    |
| NFYA | ZNF740    |
| NFYB | AAMP      |
| NFYB | ABCA6     |
| NFYB | ABI3      |
| NFYB | ABL1      |
| NFYB | ACAT2     |
| NFYB | ACBD5     |
| NFYB | ACIN1     |
| NFYB | ACOT13    |

|      |           |
|------|-----------|
| NFYB | ACOT4     |
| NFYB | ACOT9     |
| NFYB | ACTA2     |
| NFYB | ACTL6A    |
| NFYB | ACTR1A    |
| NFYB | ACYP1     |
| NFYB | ADAM10    |
| NFYB | ADD3      |
| NFYB | ADPGK     |
| NFYB | AICDA     |
| NFYB | AK2       |
| NFYB | AKAP11    |
| NFYB | AKR1B1    |
| NFYB | ALDH6A1   |
| NFYB | ALDH7A1   |
| NFYB | ALG12     |
| NFYB | ALKBH5    |
| NFYB | ALKBH6    |
| NFYB | AMD1      |
| NFYB | AMMECR1   |
| NFYB | ANAPC11   |
| NFYB | ANAPC15   |
| NFYB | ANKRD54   |
| NFYB | ANP32A    |
| NFYB | ANP32B    |
| NFYB | ANP32E    |
| NFYB | AP2S1     |
| NFYB | APEX2     |
| NFYB | APIP      |
| NFYB | APLP2     |
| NFYB | APOL3     |
| NFYB | APOLD1    |
| NFYB | ARFIP2    |
| NFYB | ARHGAP10  |
| NFYB | ARHGAP11A |
| NFYB | ARHGAP30  |
| NFYB | ARHGEF6   |
| NFYB | ARID2     |
| NFYB | ARL16     |
| NFYB | ARL6IP1   |
| NFYB | ARL6IP6   |
| NFYB | ARMC1     |
| NFYB | ARMCX6    |
| NFYB | ARPC5     |
| NFYB | ARRB2     |
| NFYB | ASCC1     |
| NFYB | ASF1B     |
| NFYB | ATAD2     |
| NFYB | ATAD5     |
| NFYB | ATF7      |

|      |          |
|------|----------|
| NFYB | ATF7IP   |
| NFYB | ATG16L2  |
| NFYB | ATP6V1E1 |
| NFYB | AURKB    |
| NFYB | B3GLCT   |
| NFYB | BABAM1   |
| NFYB | BACH2    |
| NFYB | BAG4     |
| NFYB | BARD1    |
| NFYB | BAZ1B    |
| NFYB | BCKDHA   |
| NFYB | BCL11A   |
| NFYB | BCL2L12  |
| NFYB | BCL7B    |
| NFYB | BNIP3L   |
| NFYB | BRCA1    |
| NFYB | BRD2     |
| NFYB | BRD3     |
| NFYB | BRD7     |
| NFYB | BUB3     |
| NFYB | C12orf65 |
| NFYB | C16orf95 |
| NFYB | C21orf58 |
| NFYB | C3orf67  |
| NFYB | C4orf33  |
| NFYB | C5orf34  |
| NFYB | C6orf99  |
| NFYB | CABIN1   |
| NFYB | CALM1    |
| NFYB | CALM2    |
| NFYB | CALM3    |
| NFYB | CAMK2D   |
| NFYB | CAMTA1   |
| NFYB | CAPZB    |
| NFYB | CARHSP1  |
| NFYB | CASP2    |
| NFYB | CBFB     |
| NFYB | CBWD1    |
| NFYB | CBX3     |
| NFYB | CBX5     |
| NFYB | CCDC117  |
| NFYB | CCDC130  |
| NFYB | CCDC167  |
| NFYB | CCDC34   |
| NFYB | CCND3    |
| NFYB | CCNE2    |
| NFYB | CCNG2    |
| NFYB | CCNL1    |
| NFYB | CCT7     |
| NFYB | CCZ1     |

|      |          |
|------|----------|
| NFYB | CD247    |
| NFYB | CDC25A   |
| NFYB | CDC25C   |
| NFYB | CDC6     |
| NFYB | CDCA3    |
| NFYB | CDCA4    |
| NFYB | CDK1     |
| NFYB | CDK17    |
| NFYB | CDK2     |
| NFYB | CDK2AP2  |
| NFYB | CDK5RAP3 |
| NFYB | CDKN1B   |
| NFYB | CDKN2D   |
| NFYB | CDKN3    |
| NFYB | CDT1     |
| NFYB | CENPF    |
| NFYB | CENPH    |
| NFYB | CENPK    |
| NFYB | CENPL    |
| NFYB | CENPM    |
| NFYB | CENPU    |
| NFYB | CEP57    |
| NFYB | CEP97    |
| NFYB | CETN3    |
| NFYB | CGGBP1   |
| NFYB | CHCHD3   |
| NFYB | CHEK1    |
| NFYB | CHEK2    |
| NFYB | CHMP2B   |
| NFYB | CHP1     |
| NFYB | CHURC1   |
| NFYB | CIRBP    |
| NFYB | CIT      |
| NFYB | CKS1B    |
| NFYB | CKS2     |
| NFYB | CLSPN    |
| NFYB | CNIH1    |
| NFYB | CN0T1    |
| NFYB | CN0T2    |
| NFYB | COPS3    |
| NFYB | COPS4    |
| NFYB | COX6A1   |
| NFYB | COX7B    |
| NFYB | COX8A    |
| NFYB | CRNDE    |
| NFYB | CSE1L    |
| NFYB | CSRP1    |
| NFYB | CTDSP2   |
| NFYB | CTNNBIP1 |
| NFYB | CXCR4    |



|      |         |
|------|---------|
| NFYB | CYB5A   |
| NFYB | CYCS    |
| NFYB | CYHR1   |
| NFYB | DAAM1   |
| NFYB | DARS    |
| NFYB | DCAF7   |
| NFYB | DCP1A   |
| NFYB | DCP2    |
| NFYB | DCXR    |
| NFYB | DDB2    |
| NFYB | DDIAS   |
| NFYB | DDT     |
| NFYB | DDX39A  |
| NFYB | DDX50   |
| NFYB | DEDD    |
| NFYB | DEK     |
| NFYB | DEPDC5  |
| NFYB | DGAT1   |
| NFYB | DGCR8   |
| NFYB | DHCR24  |
| NFYB | DHX15   |
| NFYB | DLD     |
| NFYB | DLG1    |
| NFYB | DMD     |
| NFYB | DMTF1   |
| NFYB | DNAJB2  |
| NFYB | DNAJC8  |
| NFYB | DOCK9   |
| NFYB | DPP3    |
| NFYB | DPYSL2  |
| NFYB | DRG1    |
| NFYB | DUSP23  |
| NFYB | DVL3    |
| NFYB | DYNLL1  |
| NFYB | DYNLT1  |
| NFYB | E2F1    |
| NFYB | E2F2    |
| NFYB | E2F7    |
| NFYB | EAF2    |
| NFYB | EBAG9   |
| NFYB | EBF1    |
| NFYB | EBP     |
| NFYB | EFCAB11 |
| NFYB | EGLN1   |
| NFYB | EIF2AK3 |
| NFYB | EIF2B2  |
| NFYB | EIF4E   |
| NFYB | ELP4    |
| NFYB | EMC9    |
| NFYB | EML2    |

|      |           |
|------|-----------|
| NFYB | ERH       |
| NFYB | ERP44     |
| NFYB | ESC02     |
| NFYB | ESPL1     |
| NFYB | ETFA      |
| NFYB | ETFB      |
| NFYB | EZH2      |
| NFYB | FAF1      |
| NFYB | FAM102A   |
| NFYB | FAM102B   |
| NFYB | FAM111A   |
| NFYB | FAM118A   |
| NFYB | FAM120A0S |
| NFYB | FAM122B   |
| NFYB | FAM129A   |
| NFYB | FAM133B   |
| NFYB | FAM184A   |
| NFYB | FAM192A   |
| NFYB | FAM208A   |
| NFYB | FAM208B   |
| NFYB | FAM20B    |
| NFYB | FAM221A   |
| NFYB | FAM49A    |
| NFYB | FAM76B    |
| NFYB | FAM81A    |
| NFYB | FANCA     |
| NFYB | FANCI     |
| NFYB | FANCL     |
| NFYB | FBXL12    |
| NFYB | FBX011    |
| NFYB | FBX03     |
| NFYB | FBX05     |
| NFYB | FBX08     |
| NFYB | FDFT1     |
| NFYB | FDPS      |
| NFYB | FGD6      |
| NFYB | FGGY      |
| NFYB | FH        |
| NFYB | FKBPL     |
| NFYB | FLAD1     |
| NFYB | FN3KRP    |
| NFYB | FNIP1     |
| NFYB | G3BP1     |
| NFYB | GART      |
| NFYB | GCA       |
| NFYB | GCDH      |
| NFYB | GCH1      |
| NFYB | GCHFR     |
| NFYB | GDE1      |
| NFYB | GFOD1     |

|      |           |
|------|-----------|
| NFYB | GGA2      |
| NFYB | GGCT      |
| NFYB | GGNBP2    |
| NFYB | GID4      |
| NFYB | GL01      |
| NFYB | GMNN      |
| NFYB | GNB2      |
| NFYB | GNGT2     |
| NFYB | GOLGA8B   |
| NFYB | GORAB     |
| NFYB | GPN3      |
| NFYB | GTF2A1    |
| NFYB | GTF2E2    |
| NFYB | GTF3C5    |
| NFYB | GTSE1     |
| NFYB | H2AFV     |
| NFYB | H2AFX     |
| NFYB | H2AFY     |
| NFYB | H2AFZ     |
| NFYB | H3F3A     |
| NFYB | H3F3B     |
| NFYB | HADH      |
| NFYB | HAGH      |
| NFYB | HAT1      |
| NFYB | HAUS4     |
| NFYB | HAUS7     |
| NFYB | HBS1L     |
| NFYB | HES6      |
| NFYB | HIGD1A    |
| NFYB | HINT2     |
| NFYB | HIST1H1D  |
| NFYB | HIST1H1E  |
| NFYB | HIST1H2AC |
| NFYB | HIST1H3A  |
| NFYB | HIST1H4C  |
| NFYB | HIST2H2AC |
| NFYB | HMG20A    |
| NFYB | HMGA1     |
| NFYB | HMGB1     |
| NFYB | HMGB2     |
| NFYB | HMGCS1    |
| NFYB | HMGN1     |
| NFYB | HMGN2     |
| NFYB | HNRNPA0   |
| NFYB | HNRNPA2B1 |
| NFYB | HNRNPA3   |
| NFYB | HNRNPAB   |
| NFYB | HNRNPC    |
| NFYB | HNRNPD    |
| NFYB | HNRNPF    |

|      |          |
|------|----------|
| NFYB | HNRNPK   |
| NFYB | HNRNPL   |
| NFYB | HNRNPLL  |
| NFYB | HNRNPR   |
| NFYB | HNRNPU   |
| NFYB | HNRNPUL2 |
| NFYB | HOXB2    |
| NFYB | HS2ST1   |
| NFYB | HSCB     |
| NFYB | HSD17B10 |
| NFYB | HSD17B12 |
| NFYB | HSPA2    |
| NFYB | HSPA4    |
| NFYB | HSPA8    |
| NFYB | HUWE1    |
| NFYB | HYPK     |
| NFYB | IBTK     |
| NFYB | IDH2     |
| NFYB | IDH3A    |
| NFYB | IDH3G    |
| NFYB | IGSF8    |
| NFYB | ILF2     |
| NFYB | IMMP1L   |
| NFYB | IMMT     |
| NFYB | IMP4     |
| NFYB | INCENP   |
| NFYB | ING3     |
| NFYB | INTS8    |
| NFYB | IP09     |
| NFYB | IQCB1    |
| NFYB | IRF1     |
| NFYB | IRF2     |
| NFYB | ISCA2    |
| NFYB | JADE1    |
| NFYB | JDP2     |
| NFYB | JMJD1C   |
| NFYB | KANK1    |
| NFYB | KATNA1   |
| NFYB | KCNQ5    |
| NFYB | KCTD5    |
| NFYB | KCTD7    |
| NFYB | KIAA1841 |
| NFYB | KIF22    |
| NFYB | KIF4A    |
| NFYB | KLF2     |
| NFYB | KLHL5    |
| NFYB | KMT2C    |
| NFYB | KMT2E    |
| NFYB | KPNB1    |
| NFYB | L2HGDH   |

|      |           |
|------|-----------|
| NFYB | LBR       |
| NFYB | LDHB      |
| NFYB | LIMS1     |
| NFYB | LMNB1     |
| NFYB | LPP       |
| NFYB | LRIF1     |
| NFYB | LRMP      |
| NFYB | LRRC45    |
| NFYB | LSM1      |
| NFYB | LSM4      |
| NFYB | LSM6      |
| NFYB | LSM8      |
| NFYB | LUC7L2    |
| NFYB | LYPLA1    |
| NFYB | LYRM1     |
| NFYB | MAEA      |
| NFYB | MAP2K1    |
| NFYB | MAPRE1    |
| NFYB | MARK3     |
| NFYB | MAZ       |
| NFYB | MBD6      |
| NFYB | MCM10     |
| NFYB | MCM3      |
| NFYB | MCM4      |
| NFYB | MCM5      |
| NFYB | MCM6      |
| NFYB | MCM7      |
| NFYB | MCTS1     |
| NFYB | MCU       |
| NFYB | MDM2      |
| NFYB | MED19     |
| NFYB | MED30     |
| NFYB | MED8      |
| NFYB | MEF2C-AS1 |
| NFYB | MEGF9     |
| NFYB | MELK      |
| NFYB | MEPCE     |
| NFYB | METAP1    |
| NFYB | METTTL17  |
| NFYB | MFF       |
| NFYB | MFGE8     |
| NFYB | MFSD11    |
| NFYB | MGMT      |
| NFYB | MICU2     |
| NFYB | MINK1     |
| NFYB | MIS12     |
| NFYB | MKI67     |
| NFYB | MKL1      |
| NFYB | MKLN1     |
| NFYB | MLXIP     |

|      |          |
|------|----------|
| NFYB | MMAB     |
| NFYB | MMD      |
| NFYB | MORF4L1  |
| NFYB | MORF4L2  |
| NFYB | MPC2     |
| NFYB | MPP5     |
| NFYB | MRM3     |
| NFYB | MRPL18   |
| NFYB | MRPL28   |
| NFYB | MRPL37   |
| NFYB | MRPL50   |
| NFYB | MRPL51   |
| NFYB | MRPS22   |
| NFYB | MRPS36   |
| NFYB | MSH2     |
| NFYB | MSL3     |
| NFYB | MTHFD1   |
| NFYB | MTOR     |
| NFYB | MVK      |
| NFYB | MXD3     |
| NFYB | MYBL1    |
| NFYB | MYH10    |
| NFYB | MYO1D    |
| NFYB | MZT1     |
| NFYB | NAA10    |
| NFYB | NAA60    |
| NFYB | NADK2    |
| NFYB | NAP1L4   |
| NFYB | NASP     |
| NFYB | NBR1     |
| NFYB | NCAPD3   |
| NFYB | NCAPG2   |
| NFYB | NCAPH    |
| NFYB | NCK2     |
| NFYB | NCOA7    |
| NFYB | NDUFA11  |
| NFYB | NDUFA2   |
| NFYB | NDUFA5   |
| NFYB | NDUFA6   |
| NFYB | NDUFAF3  |
| NFYB | NDUFB11  |
| NFYB | NDUFB3   |
| NFYB | NFATC2IP |
| NFYB | NFATC3   |
| NFYB | NFYB     |
| NFYB | NFYC     |
| NFYB | NIPBL    |
| NFYB | NMT1     |
| NFYB | NONO     |
| NFYB | NRF1     |

|      |          |
|------|----------|
| NFYB | NT5DC1   |
| NFYB | NT5DC2   |
| NFYB | NUBP2    |
| NFYB | NUCKS1   |
| NFYB | NUDC     |
| NFYB | NUDT21   |
| NFYB | NUDT9    |
| NFYB | NUP50    |
| NFYB | NUP88    |
| NFYB | NUPL2    |
| NFYB | NUSAP1   |
| NFYB | NXT1     |
| NFYB | OAT      |
| NFYB | OCIAD1   |
| NFYB | OIP5     |
| NFYB | ORC4     |
| NFYB | ORC6     |
| NFYB | ORMDL1   |
| NFYB | OSBPL11  |
| NFYB | OSBPL9   |
| NFYB | PABPN1   |
| NFYB | PAFAH1B3 |
| NFYB | PAQR4    |
| NFYB | PARP2    |
| NFYB | PARPBP   |
| NFYB | PBK      |
| NFYB | PBX3     |
| NFYB | PCNA     |
| NFYB | PCYT2    |
| NFYB | PDCL     |
| NFYB | PDRG1    |
| NFYB | PDS5B    |
| NFYB | PDZD8    |
| NFYB | PEG10    |
| NFYB | PELI1    |
| NFYB | PET100   |
| NFYB | PGK1     |
| NFYB | PHAX     |
| NFYB | PHF19    |
| NFYB | PHF3     |
| NFYB | PHF5A    |
| NFYB | PHRF1    |
| NFYB | PIAS4    |
| NFYB | PIF1     |
| NFYB | PIGV     |
| NFYB | PIN1     |
| NFYB | PJA2     |
| NFYB | PKM      |
| NFYB | PKMYT1   |
| NFYB | PMF1     |

|      |            |
|------|------------|
| NFYB | PMS1       |
| NFYB | PNN        |
| NFYB | PNP        |
| NFYB | PNRC2      |
| NFYB | POGZ       |
| NFYB | POLA1      |
| NFYB | POLD4      |
| NFYB | POLDIP3    |
| NFYB | POLR3K     |
| NFYB | POP5       |
| NFYB | POU2AF1    |
| NFYB | PPIA       |
| NFYB | PPP2CA     |
| NFYB | PPP2R1A    |
| NFYB | PPP2R5A    |
| NFYB | PPP2R5E    |
| NFYB | PPP5C      |
| NFYB | PPTC7      |
| NFYB | PRADC1     |
| NFYB | PRC1       |
| NFYB | PRDX3      |
| NFYB | PRKCD      |
| NFYB | PRPF40A    |
| NFYB | PRPSAP1    |
| NFYB | PRPSAP2    |
| NFYB | PRRC2A     |
| NFYB | PRRC2C     |
| NFYB | PSMA2      |
| NFYB | PSMA3      |
| NFYB | PSMA3-AS1  |
| NFYB | PSMA5      |
| NFYB | PSMB3      |
| NFYB | PSMC3      |
| NFYB | PSMC3IP    |
| NFYB | PSMD10     |
| NFYB | PSMD14     |
| NFYB | PTBP1      |
| NFYB | PTMA       |
| NFYB | PTMS       |
| NFYB | PTPRA      |
| NFYB | PTTG1      |
| NFYB | PVT1       |
| NFYB | PWWP2A     |
| NFYB | PXMP2      |
| NFYB | PYCR2      |
| NFYB | RAB11B-AS1 |
| NFYB | RAB14      |
| NFYB | RAB1A      |
| NFYB | RAB27A     |
| NFYB | RAB3GAP1   |



|      |          |
|------|----------|
| NFYB | RAB5C    |
| NFYB | RABGAP1  |
| NFYB | RABGAP1L |
| NFYB | RAD17    |
| NFYB | RAD21    |
| NFYB | RAD54L   |
| NFYB | RALY     |
| NFYB | RANBP1   |
| NFYB | RASSF7   |
| NFYB | RBBP4    |
| NFYB | RBBP7    |
| NFYB | RBL1     |
| NFYB | RBM15    |
| NFYB | RBM23    |
| NFYB | RBM4     |
| NFYB | RBM42    |
| NFYB | RBM6     |
| NFYB | RBM8A    |
| NFYB | RBX1     |
| NFYB | RCN1     |
| NFYB | RCN2     |
| NFYB | RECK     |
| NFYB | RECQL4   |
| NFYB | RERE     |
| NFYB | REV3L    |
| NFYB | RFC5     |
| NFYB | RFWD3    |
| NFYB | RGS9     |
| NFYB | RLN2     |
| NFYB | RMI2     |
| NFYB | RNASEH2A |
| NFYB | RNF13    |
| NFYB | RNF6     |
| NFYB | RNFT2    |
| NFYB | RP2      |
| NFYB | RPA1     |
| NFYB | RPP30    |
| NFYB | RPUSD1   |
| NFYB | RRM2B    |
| NFYB | RSBN1L   |
| NFYB | RTN3     |
| NFYB | RTN4     |
| NFYB | RTN4IP1  |
| NFYB | RUFY1    |
| NFYB | RUVBL1   |
| NFYB | S100A10  |
| NFYB | S100PBP  |
| NFYB | SAP30BP  |
| NFYB | SARNP    |
| NFYB | SDE2     |

|      |          |
|------|----------|
| NFYB | SEC22A   |
| NFYB | SEC31A   |
| NFYB | SEMA4B   |
| NFYB | SERP2    |
| NFYB | SETD4    |
| NFYB | SETD9    |
| NFYB | SF1      |
| NFYB | SF3B2    |
| NFYB | SF3B4    |
| NFYB | SFPQ     |
| NFYB | SFR1     |
| NFYB | SFXN1    |
| NFYB | SFXN5    |
| NFYB | SH3GLB2  |
| NFYB | SHCBP1   |
| NFYB | SHOC2    |
| NFYB | SIAH1    |
| NFYB | SIK2     |
| NFYB | SIVA1    |
| NFYB | SKA2     |
| NFYB | SLBP     |
| NFYB | SLC1A4   |
| NFYB | SLC20A1  |
| NFYB | SLC25A12 |
| NFYB | SLC25A19 |
| NFYB | SLC25A5  |
| NFYB | SLC2A1   |
| NFYB | SLC31A1  |
| NFYB | SLC39A8  |
| NFYB | SLC4A8   |
| NFYB | SLC9A3R1 |
| NFYB | SMAD2    |
| NFYB | SMC2     |
| NFYB | SMC3     |
| NFYB | SMG9     |
| NFYB | SND1     |
| NFYB | SNRNP25  |
| NFYB | SNRPF    |
| NFYB | SNRPG    |
| NFYB | SON      |
| NFYB | SPAG5    |
| NFYB | SPC24    |
| NFYB | SPC25    |
| NFYB | SPDL1    |
| NFYB | SPI1     |
| NFYB | SPRED2   |
| NFYB | SPTSSA   |
| NFYB | SQLE     |
| NFYB | SRGAP2C  |
| NFYB | SRP9     |

|      |          |
|------|----------|
| NFYB | SRRM1    |
| NFYB | SRSF1    |
| NFYB | SRSF10   |
| NFYB | SRSF2    |
| NFYB | SRSF3    |
| NFYB | SSB      |
| NFYB | SSBP2    |
| NFYB | SSBP3    |
| NFYB | SSX2IP   |
| NFYB | STAG1    |
| NFYB | STAU2    |
| NFYB | STK11    |
| NFYB | STK24    |
| NFYB | STK3     |
| NFYB | STK38L   |
| NFYB | STMN1    |
| NFYB | STOML2   |
| NFYB | STPG1    |
| NFYB | STT3B    |
| NFYB | SUCLG2   |
| NFYB | SUM02    |
| NFYB | SUN2     |
| NFYB | SUPT20H  |
| NFYB | SUV39H1  |
| NFYB | SUZ12    |
| NFYB | SYVN1    |
| NFYB | TAB2     |
| NFYB | TAF1     |
| NFYB | TAF15    |
| NFYB | TAF1C    |
| NFYB | TALD01   |
| NFYB | TANK     |
| NFYB | TBC1D10B |
| NFYB | TBC1D15  |
| NFYB | TBCC     |
| NFYB | TBL1XR1  |
| NFYB | TCF12    |
| NFYB | TCF19    |
| NFYB | TCP1     |
| NFYB | TDP1     |
| NFYB | TDRKH    |
| NFYB | TECR     |
| NFYB | TERF1    |
| NFYB | THOP1    |
| NFYB | TIGAR    |
| NFYB | TIMM17A  |
| NFYB | TIMM17B  |
| NFYB | TK1      |
| NFYB | TLE4     |
| NFYB | TLK2     |

|      |              |
|------|--------------|
| NFYB | TM7SF3       |
| NFYB | TMA7         |
| NFYB | TMED1        |
| NFYB | TMEM126B     |
| NFYB | TMEM131      |
| NFYB | TMEM14A      |
| NFYB | TMEM14B      |
| NFYB | TMEM161B-AS1 |
| NFYB | TMEM165      |
| NFYB | TMEM167A     |
| NFYB | TMEM218      |
| NFYB | TMEM50B      |
| NFYB | TMEM97       |
| NFYB | TMP0         |
| NFYB | TNK2         |
| NFYB | TNNC2        |
| NFYB | TOP1MT       |
| NFYB | TOP2A        |
| NFYB | TPGS2        |
| NFYB | TPP2         |
| NFYB | TPRA1        |
| NFYB | TRAF2        |
| NFYB | TRIM11       |
| NFYB | TRIM26       |
| NFYB | TRUB1        |
| NFYB | TSC22D1      |
| NFYB | TSPAN13      |
| NFYB | TUBB         |
| NFYB | TUBB2B       |
| NFYB | TUBB4B       |
| NFYB | TUT1         |
| NFYB | TXNDC16      |
| NFYB | TXNDC9       |
| NFYB | UBB          |
| NFYB | UBE2A        |
| NFYB | UBE2C        |
| NFYB | UBE2D3       |
| NFYB | UBE2E2       |
| NFYB | UBE2I        |
| NFYB | UBE2J1       |
| NFYB | UBE2S        |
| NFYB | UBE2T        |
| NFYB | UBR5         |
| NFYB | UCP2         |
| NFYB | UGP2         |
| NFYB | UHRF1        |
| NFYB | UNG          |
| NFYB | UNK          |
| NFYB | UPF3B        |
| NFYB | UQCC2        |

|      |         |
|------|---------|
| NFYB | UQCRC2  |
| NFYB | USP1    |
| NFYB | USP16   |
| NFYB | USP5    |
| NFYB | USPL1   |
| NFYB | UTP6    |
| NFYB | VBP1    |
| NFYB | VEZT    |
| NFYB | VGLL4   |
| NFYB | VPS11   |
| NFYB | VPS29   |
| NFYB | VPS72   |
| NFYB | VRK1    |
| NFYB | VRK3    |
| NFYB | WAPL    |
| NFYB | WDR5    |
| NFYB | WIPI1   |
| NFYB | WRNIP1  |
| NFYB | WTAP    |
| NFYB | WWOX    |
| NFYB | WWP2    |
| NFYB | XAB2    |
| NFYB | XIST    |
| NFYB | XP01    |
| NFYB | XRCC4   |
| NFYB | XRCC6   |
| NFYB | YIPF4   |
| NFYB | YKT6    |
| NFYB | YPEL3   |
| NFYB | YWHAB   |
| NFYB | YWHAQ   |
| NFYB | YWHAZ   |
| NFYB | ZBTB14  |
| NFYB | ZBTB20  |
| NFYB | ZCCHC17 |
| NFYB | ZDHC12  |
| NFYB | ZFAND4  |
| NFYB | ZFHX3   |
| NFYB | ZFP64   |
| NFYB | ZHX2    |
| NFYB | ZKSCAN1 |
| NFYB | ZMYM2   |
| NFYB | ZNF132  |
| NFYB | ZNF195  |
| NFYB | ZNF326  |
| NFYB | ZNF429  |
| NFYB | ZNF441  |
| NFYB | ZNF638  |
| NFYB | ZNF652  |
| NFYB | ZNF672  |

|      |         |
|------|---------|
| NFYB | ZNF7    |
| NFYB | ZNF76   |
| NFYB | ZNF775  |
| NFYB | ZNF787  |
| NFYB | ZNF821  |
| NFYB | ZNF92   |
| NFYB | ZNHIT3  |
| NFYB | ZRSR2   |
| NFYB | ZWINT   |
| NFYC | ABHD15  |
| NFYC | ACAT2   |
| NFYC | ACD     |
| NFYC | ACIN1   |
| NFYC | ACLY    |
| NFYC | ACTL6A  |
| NFYC | ACTR1B  |
| NFYC | ADAR    |
| NFYC | ADD1    |
| NFYC | ADD3    |
| NFYC | AGL     |
| NFYC | AG01    |
| NFYC | AKR1B1  |
| NFYC | ALAD    |
| NFYC | ALCAM   |
| NFYC | ALDH2   |
| NFYC | ALDH7A1 |
| NFYC | ALG9    |
| NFYC | ALKBH5  |
| NFYC | ALKBH6  |
| NFYC | ANAPC11 |
| NFYC | ANKRD39 |
| NFYC | AP2M1   |
| NFYC | AP2S1   |
| NFYC | AP3D1   |
| NFYC | APIP    |
| NFYC | APLP2   |
| NFYC | AP0L3   |
| NFYC | AP0LD1  |
| NFYC | ARAP2   |
| NFYC | ARID2   |
| NFYC | ARID4A  |
| NFYC | ARL2    |
| NFYC | ARL2BP  |
| NFYC | ARL4A   |
| NFYC | ARL6IP1 |
| NFYC | ARL6IP5 |
| NFYC | ARMC1   |
| NFYC | ARMCX6  |
| NFYC | ASPSCR1 |
| NFYC | ATF6B   |

|      |          |
|------|----------|
| NFYC | ATF7     |
| NFYC | ATG16L2  |
| NFYC | ATXN7    |
| NFYC | ATXN7L3  |
| NFYC | AURKB    |
| NFYC | BCAR1    |
| NFYC | BCAT2    |
| NFYC | BTN2A1   |
| NFYC | BUB3     |
| NFYC | C12orf76 |
| NFYC | C15orf41 |
| NFYC | C18orf32 |
| NFYC | C3orf67  |
| NFYC | CALM1    |
| NFYC | CALM2    |
| NFYC | CALM3    |
| NFYC | CAMTA1   |
| NFYC | CAND1    |
| NFYC | CAPN1    |
| NFYC | CBFB     |
| NFYC | CCDC102A |
| NFYC | CCDC115  |
| NFYC | CCDC34   |
| NFYC | CCDC77   |
| NFYC | CCNA2    |
| NFYC | CCNB2    |
| NFYC | CCNE2    |
| NFYC | CCNG2    |
| NFYC | CCNL2    |
| NFYC | CDC23    |
| NFYC | CDC27    |
| NFYC | CDCA2    |
| NFYC | CDCA3    |
| NFYC | CDK1     |
| NFYC | CDKN2D   |
| NFYC | CDKN3    |
| NFYC | CELF1    |
| NFYC | CENPK    |
| NFYC | CEP85    |
| NFYC | CETN2    |
| NFYC | CHCHD3   |
| NFYC | CHCHD7   |
| NFYC | CHD6     |
| NFYC | CHD7     |
| NFYC | CHMP2A   |
| NFYC | CHST10   |
| NFYC | CHURC1   |
| NFYC | CIC      |
| NFYC | CKAP2    |
| NFYC | CKS1B    |

|      |            |
|------|------------|
| NFYC | CKS2       |
| NFYC | CLK3       |
| NFYC | CLTA       |
| NFYC | CN0T3      |
| NFYC | CNST       |
| NFYC | COMMD10    |
| NFYC | COPS7A     |
| NFYC | COX6B1     |
| NFYC | COX7B      |
| NFYC | COX8A      |
| NFYC | CSNK1G3    |
| NFYC | CTDSP2     |
| NFYC | CUL3       |
| NFYC | CWC22      |
| NFYC | CYCS       |
| NFYC | DBI        |
| NFYC | DCLRE1C    |
| NFYC | DCP2       |
| NFYC | DCTN4      |
| NFYC | DDOST      |
| NFYC | DDX11      |
| NFYC | DDX39A     |
| NFYC | DGKZ       |
| NFYC | DGUOK      |
| NFYC | DLD        |
| NFYC | DMD        |
| NFYC | DNAJB11    |
| NFYC | DNAJB2     |
| NFYC | DNAJC13    |
| NFYC | DNAJC4     |
| NFYC | DNAJC8     |
| NFYC | DOCK9      |
| NFYC | DPYSL2     |
| NFYC | DRG1       |
| NFYC | DUSP10     |
| NFYC | EAF2       |
| NFYC | EBAG9      |
| NFYC | ECT2       |
| NFYC | EGR1       |
| NFYC | EIF3L      |
| NFYC | EIF4G2     |
| NFYC | ELAC2      |
| NFYC | ELAVL1     |
| NFYC | ELK1       |
| NFYC | ELM02      |
| NFYC | ELP4       |
| NFYC | ELP6       |
| NFYC | EMC2       |
| NFYC | EML4       |
| NFYC | ENTPD3-AS1 |



|      |          |
|------|----------|
| NFYC | EPC1     |
| NFYC | ERCC6L   |
| NFYC | ERICH1   |
| NFYC | ETFA     |
| NFYC | FABP5    |
| NFYC | FAM122B  |
| NFYC | FAM192A  |
| NFYC | FAM217B  |
| NFYC | FAM32A   |
| NFYC | FANCL    |
| NFYC | FBX046   |
| NFYC | FDFT1    |
| NFYC | FDPS     |
| NFYC | FGD5-AS1 |
| NFYC | FLYWCH1  |
| NFYC | FOXN2    |
| NFYC | FPGS     |
| NFYC | G2E3     |
| NFYC | GALK1    |
| NFYC | GALNT14  |
| NFYC | GBF1     |
| NFYC | GCSH     |
| NFYC | GGA2     |
| NFYC | GID8     |
| NFYC | GLRX5    |
| NFYC | GLUD1    |
| NFYC | GNAI2    |
| NFYC | GOLGA8A  |
| NFYC | GOLPH3L  |
| NFYC | GOT1     |
| NFYC | GPR108   |
| NFYC | GSTZ1    |
| NFYC | GTF2B    |
| NFYC | GTF2E2   |
| NFYC | GTF2F2   |
| NFYC | GTF3C5   |
| NFYC | H2AFV    |
| NFYC | H2AFZ    |
| NFYC | H3F3A    |
| NFYC | H3F3B    |
| NFYC | HAGH     |
| NFYC | HCN3     |
| NFYC | HDDC2    |
| NFYC | HENMT1   |
| NFYC | HERC5    |
| NFYC | HES6     |
| NFYC | HIGD1A   |
| NFYC | HIST1H4C |
| NFYC | HLA-A    |
| NFYC | HLA-DPB1 |

|      |          |
|------|----------|
| NFYC | HLA-DRB1 |
| NFYC | HMGB3    |
| NFYC | HMGN1    |
| NFYC | HMGN2    |
| NFYC | HMMR     |
| NFYC | HNRNPA3  |
| NFYC | HNRNPD   |
| NFYC | HNRNPH2  |
| NFYC | HNRNPL   |
| NFYC | HNRNPR   |
| NFYC | HNRNPUL1 |
| NFYC | HOXB2    |
| NFYC | HP1BP3   |
| NFYC | HSD17B12 |
| NFYC | HSD17B7  |
| NFYC | HSPA8    |
| NFYC | HYLS1    |
| NFYC | HYOU1    |
| NFYC | IARS     |
| NFYC | IDH3G    |
| NFYC | IFFO1    |
| NFYC | IKZF1    |
| NFYC | IMMT     |
| NFYC | IQCB1    |
| NFYC | IQSEC1   |
| NFYC | IRF2     |
| NFYC | IRF2BP1  |
| NFYC | IRS2     |
| NFYC | ISCA1    |
| NFYC | IST1     |
| NFYC | IWS1     |
| NFYC | JAK1     |
| NFYC | JMJD1C   |
| NFYC | KDF1     |
| NFYC | KHSRP    |
| NFYC | KIF22    |
| NFYC | KLHL24   |
| NFYC | KMT5B    |
| NFYC | KNTC1    |
| NFYC | KPNA2    |
| NFYC | KXD1     |
| NFYC | LAMTOR1  |
| NFYC | LAMTOR4  |
| NFYC | LANCL1   |
| NFYC | LBR      |
| NFYC | LDB1     |
| NFYC | LIAS     |
| NFYC | LRIF1    |
| NFYC | LSM1     |
| NFYC | LSM6     |

|      |          |
|------|----------|
| NFYC | LYPLA1   |
| NFYC | LYRM7    |
| NFYC | LYRM9    |
| NFYC | MADD     |
| NFYC | MAEA     |
| NFYC | MAF1     |
| NFYC | MAML2    |
| NFYC | MAP2K1   |
| NFYC | MAP2K3   |
| NFYC | MAP3K7CL |
| NFYC | MAT2B    |
| NFYC | MBTD1    |
| NFYC | MCU      |
| NFYC | MDC1     |
| NFYC | MDH1     |
| NFYC | MED24    |
| NFYC | MED8     |
| NFYC | MEF2C    |
| NFYC | METAP1   |
| NFYC | MFF      |
| NFYC | MICAL1   |
| NFYC | MKI67    |
| NFYC | MLF2     |
| NFYC | MMD      |
| NFYC | MMS19    |
| NFYC | MOB1A    |
| NFYC | MPC2     |
| NFYC | MRM3     |
| NFYC | MRPL18   |
| NFYC | MRPL50   |
| NFYC | MRPL51   |
| NFYC | MTFR2    |
| NFYC | MTIF3    |
| NFYC | MXD3     |
| NFYC | MYH9     |
| NFYC | NAA60    |
| NFYC | NAGLU    |
| NFYC | NANS     |
| NFYC | NCALD    |
| NFYC | NCOA2    |
| NFYC | NCOA5    |
| NFYC | NCOA7    |
| NFYC | NDUFA5   |
| NFYC | NDUFB3   |
| NFYC | NDUFS2   |
| NFYC | NDUFS8   |
| NFYC | NEDD9    |
| NFYC | NEK2     |
| NFYC | NFYB     |
| NFYC | NFYC     |

|      |            |
|------|------------|
| NFYC | NGDN       |
| NFYC | NMT1       |
| NFYC | NRBP1      |
| NFYC | NSMCE1     |
| NFYC | NSMCE4A    |
| NFYC | NUDT2      |
| NFYC | NUP37      |
| NFYC | NUP88      |
| NFYC | NUSAP1     |
| NFYC | NUTM2A-AS1 |
| NFYC | NUTM2B-AS1 |
| NFYC | OAZ1       |
| NFYC | OGF0D1     |
| NFYC | OSBPL11    |
| NFYC | OSBPL8     |
| NFYC | PAK4       |
| NFYC | PCNT       |
| NFYC | PCYT2      |
| NFYC | PDCD10     |
| NFYC | PDHX       |
| NFYC | PDK2       |
| NFYC | PDLIM7     |
| NFYC | PELO       |
| NFYC | PET100     |
| NFYC | PEX16      |
| NFYC | PGK1       |
| NFYC | PHF19      |
| NFYC | PHF3       |
| NFYC | PHKG2      |
| NFYC | PIN1       |
| NFYC | PKP4       |
| NFYC | PMF1       |
| NFYC | PNP        |
| NFYC | POC1A      |
| NFYC | PPAT       |
| NFYC | PPIL1      |
| NFYC | PPM1A      |
| NFYC | PPP1R12A   |
| NFYC | PPP2CA     |
| NFYC | PPP2R5C    |
| NFYC | PPP2R5D    |
| NFYC | PRKD2      |
| NFYC | PROSER3    |
| NFYC | PRR11      |
| NFYC | PSMA2      |
| NFYC | PSMA5      |
| NFYC | PTK2B      |
| NFYC | PTP4A1     |
| NFYC | PTPRA      |
| NFYC | PTPRC      |

|      |          |
|------|----------|
| NFYC | PTRH1    |
| NFYC | PWWP2A   |
| NFYC | PXMP2    |
| NFYC | RAB11B   |
| NFYC | RAB5C    |
| NFYC | RABGAP1L |
| NFYC | RANGRF   |
| NFYC | RAP1A    |
| NFYC | RASSF2   |
| NFYC | RBM23    |
| NFYC | RBM8A    |
| NFYC | RBX1     |
| NFYC | RERE     |
| NFYC | REV1     |
| NFYC | REV3L    |
| NFYC | RFX1     |
| NFYC | RFX5     |
| NFYC | RGS3     |
| NFYC | RHBDD1   |
| NFYC | RNF219   |
| NFYC | RNF26    |
| NFYC | RNF41    |
| NFYC | ROGDI    |
| NFYC | RRM2B    |
| NFYC | RSRC2    |
| NFYC | RTN4     |
| NFYC | RUNX3    |
| NFYC | RUVBL2   |
| NFYC | SAP130   |
| NFYC | SAP30L   |
| NFYC | SBDS     |
| NFYC | SEC22C   |
| NFYC | SEMA4A   |
| NFYC | SEPT7    |
| NFYC | SFPQ     |
| NFYC | SG02     |
| NFYC | SHARPIN  |
| NFYC | SHKBP1   |
| NFYC | SIK3     |
| NFYC | SKIL     |
| NFYC | SLC1A4   |
| NFYC | SLC25A3  |
| NFYC | SLC2A1   |
| NFYC | SLC39A3  |
| NFYC | SLC04A1  |
| NFYC | SLF2     |
| NFYC | SMAD2    |
| NFYC | SMDT1    |
| NFYC | SMIM12   |
| NFYC | SMIM7    |

|      |              |
|------|--------------|
| NFYC | SMYD4        |
| NFYC | SPATA24      |
| NFYC | SPIN2B       |
| NFYC | SRGAP2C      |
| NFYC | SRP9         |
| NFYC | SSBP3        |
| NFYC | SSR1         |
| NFYC | SSX2IP       |
| NFYC | STAG1        |
| NFYC | STAMPB       |
| NFYC | STIP1        |
| NFYC | STRBP        |
| NFYC | STX5         |
| NFYC | SUM02        |
| NFYC | SYCE2        |
| NFYC | TAF15        |
| NFYC | TAF1A        |
| NFYC | TBC1D22B     |
| NFYC | TCF19        |
| NFYC | TCF7         |
| NFYC | TCTN3        |
| NFYC | TDP1         |
| NFYC | TDRD3        |
| NFYC | TES          |
| NFYC | TFCP2        |
| NFYC | TM7SF3       |
| NFYC | TMA7         |
| NFYC | TMEM120B     |
| NFYC | TMEM161B-AS1 |
| NFYC | TMEM218      |
| NFYC | TMEM241      |
| NFYC | TMP0-AS1     |
| NFYC | TNFAIP8L2    |
| NFYC | TNRC6B       |
| NFYC | TNS3         |
| NFYC | TOMM70       |
| NFYC | TOX4         |
| NFYC | TP53I11      |
| NFYC | TRAFD1       |
| NFYC | TRAPPC6B     |
| NFYC | TRIP10       |
| NFYC | TSPAN33      |
| NFYC | TTBK2        |
| NFYC | TUBB         |
| NFYC | TUBB4B       |
| NFYC | TXNDC9       |
| NFYC | UBB          |
| NFYC | UBE2F        |
| NFYC | UBE2S        |
| NFYC | UBFD1        |

|       |          |
|-------|----------|
| NFYC  | UBR7     |
| NFYC  | USP11    |
| NFYC  | USP5     |
| NFYC  | VRK3     |
| NFYC  | WAPL     |
| NFYC  | WDR5     |
| NFYC  | WDR6     |
| NFYC  | WWOX     |
| NFYC  | XP01     |
| NFYC  | XP06     |
| NFYC  | YKT6     |
| NFYC  | YPEL1    |
| NFYC  | YPEL2    |
| NFYC  | YWHAZ    |
| NFYC  | ZBED5    |
| NFYC  | ZBTB40   |
| NFYC  | ZCCHC17  |
| NFYC  | ZFAND4   |
| NFYC  | ZNF148   |
| NFYC  | ZNF253   |
| NFYC  | ZNF281   |
| NFYC  | ZNF574   |
| NFYC  | ZNF680   |
| NFYC  | ZNF720   |
| NR1H3 | BOLA1    |
| NR1H3 | CRB2     |
| NR1H3 | EPS15L1  |
| NR1H3 | EVI5     |
| NR1H3 | GUCY2C   |
| NR1H3 | NR1H3    |
| NR1H3 | PARP9    |
| NR1H3 | PRKAR1B  |
| NR1H3 | PTGS1    |
| NR1H3 | TET2     |
| NR2C1 | DGAT2    |
| NR2C1 | DHRS9    |
| NR2C1 | NR2C1    |
| NR2C2 | ADD3     |
| NR2C2 | ANKRD16  |
| NR2C2 | AP1B1    |
| NR2C2 | ATP2B1   |
| NR2C2 | BOD1L1   |
| NR2C2 | CDC42EP3 |
| NR2C2 | CHKA     |
| NR2C2 | CIB2     |
| NR2C2 | CLHC1    |
| NR2C2 | DIS3L2   |
| NR2C2 | ELAC1    |
| NR2C2 | FBX033   |
| NR2C2 | GLTP     |

|       |         |
|-------|---------|
| NR2C2 | KANSL1  |
| NR2C2 | LDB1    |
| NR2C2 | LMNA    |
| NR2C2 | MGST3   |
| NR2C2 | NLRC3   |
| NR2C2 | NR2C2   |
| NR2C2 | NUP107  |
| NR2C2 | PIK3R1  |
| NR2C2 | PIP4K2A |
| NR2C2 | SPATA2L |
| NR2C2 | SSBP3   |
| NR2C2 | T0X     |
| NR2C2 | USP9X   |
| NR2C2 | ZEB2    |
| NR2F6 | B4GALT1 |
| NR2F6 | MAPKAP1 |
| NR2F6 | MOSPD1  |
| NR2F6 | NR2F6   |
| NR2F6 | USP46   |
| NR3C1 | ABCB10  |
| NR3C1 | ACBD6   |
| NR3C1 | AC0T9   |
| NR3C1 | AC0X1   |
| NR3C1 | ACSF3   |
| NR3C1 | ACTB    |
| NR3C1 | ACTG1   |
| NR3C1 | ACTR2   |
| NR3C1 | ACTR3   |
| NR3C1 | ACTR8   |
| NR3C1 | ADA     |
| NR3C1 | ADD1    |
| NR3C1 | ADH5    |
| NR3C1 | ADNP2   |
| NR3C1 | AEBP2   |
| NR3C1 | AFF4    |
| NR3C1 | AFTPH   |
| NR3C1 | AIM2    |
| NR3C1 | AIP     |
| NR3C1 | AKAP13  |
| NR3C1 | AKAP8L  |
| NR3C1 | AKAP9   |
| NR3C1 | AKTIP   |
| NR3C1 | ALCAM   |
| NR3C1 | ALDH2   |
| NR3C1 | ALDOA   |
| NR3C1 | ALG6    |
| NR3C1 | ALKBH5  |
| NR3C1 | ALOX5   |
| NR3C1 | AMFR    |
| NR3C1 | AMMECR1 |



|       |          |
|-------|----------|
| NR3C1 | ANAPC16  |
| NR3C1 | ANAPC4   |
| NR3C1 | ANKFY1   |
| NR3C1 | ANKH     |
| NR3C1 | ANKRD10  |
| NR3C1 | ANKRD13A |
| NR3C1 | ANKRD33B |
| NR3C1 | ANKRD44  |
| NR3C1 | ANP32A   |
| NR3C1 | AP1G1    |
| NR3C1 | AP1S2    |
| NR3C1 | AP4E1    |
| NR3C1 | AP5B1    |
| NR3C1 | APOPT1   |
| NR3C1 | APPL1    |
| NR3C1 | AQP3     |
| NR3C1 | ARGLU1   |
| NR3C1 | ARHGEF1  |
| NR3C1 | ARHGEF6  |
| NR3C1 | ARHGEF7  |
| NR3C1 | ARID1B   |
| NR3C1 | ARID4B   |
| NR3C1 | ARID5B   |
| NR3C1 | ARL17B   |
| NR3C1 | ARL2BP   |
| NR3C1 | ARL3     |
| NR3C1 | ARL5A    |
| NR3C1 | ARMC9    |
| NR3C1 | ARPC1B   |
| NR3C1 | ARRDC2   |
| NR3C1 | ARRDC3   |
| NR3C1 | ASAP1    |
| NR3C1 | ASCC1    |
| NR3C1 | ASH1L    |
| NR3C1 | ASXL2    |
| NR3C1 | ATAD1    |
| NR3C1 | ATE1     |
| NR3C1 | ATG12    |
| NR3C1 | ATG13    |
| NR3C1 | ATM      |
| NR3C1 | ATR      |
| NR3C1 | ATRAID   |
| NR3C1 | ATRX     |
| NR3C1 | ATXN10   |
| NR3C1 | ATXN2L   |
| NR3C1 | B4GALT5  |
| NR3C1 | BASP1    |
| NR3C1 | BAX      |
| NR3C1 | BAZ2B    |
| NR3C1 | BBX      |

|       |          |
|-------|----------|
| NR3C1 | BCAP29   |
| NR3C1 | BCAT1    |
| NR3C1 | BCL11A   |
| NR3C1 | BEX4     |
| NR3C1 | BID      |
| NR3C1 | BIRC3    |
| NR3C1 | BIRC6    |
| NR3C1 | BLCAP    |
| NR3C1 | BLOC1S1  |
| NR3C1 | BMI1     |
| NR3C1 | BNIP2    |
| NR3C1 | BNIP3L   |
| NR3C1 | BORCS7   |
| NR3C1 | BPTF     |
| NR3C1 | BRD2     |
| NR3C1 | BR0X     |
| NR3C1 | BTG1     |
| NR3C1 | C12orf57 |
| NR3C1 | C15orf40 |
| NR3C1 | C20orf27 |
| NR3C1 | C2orf88  |
| NR3C1 | CAB39    |
| NR3C1 | CACUL1   |
| NR3C1 | CALCOCO1 |
| NR3C1 | CALHM2   |
| NR3C1 | CALM2    |
| NR3C1 | CAMK2B   |
| NR3C1 | CAMKK2   |
| NR3C1 | CAMLG    |
| NR3C1 | CANT1    |
| NR3C1 | CAPN1    |
| NR3C1 | CAPNS1   |
| NR3C1 | CAPZA1   |
| NR3C1 | CAPZA2   |
| NR3C1 | CAPZB    |
| NR3C1 | CARD8    |
| NR3C1 | CARS     |
| NR3C1 | CASC4    |
| NR3C1 | CASP2    |
| NR3C1 | CAST     |
| NR3C1 | CBFA2T3  |
| NR3C1 | CBLB     |
| NR3C1 | CCDC12   |
| NR3C1 | CCDC144A |
| NR3C1 | CCDC18   |
| NR3C1 | CCDC82   |
| NR3C1 | CCDC84   |
| NR3C1 | CCDC90B  |
| NR3C1 | CCDC91   |
| NR3C1 | CCDC92   |

|       |          |
|-------|----------|
| NR3C1 | CCNB2    |
| NR3C1 | CCNG1    |
| NR3C1 | CCNG2    |
| NR3C1 | CCNH     |
| NR3C1 | CCNI     |
| NR3C1 | CCSER2   |
| NR3C1 | CCZ1     |
| NR3C1 | CD2AP    |
| NR3C1 | CD53     |
| NR3C1 | CDC16    |
| NR3C1 | CDC25B   |
| NR3C1 | CDC40    |
| NR3C1 | CDC42SE2 |
| NR3C1 | CDC6     |
| NR3C1 | CDCA2    |
| NR3C1 | CDCA7    |
| NR3C1 | CDCA7L   |
| NR3C1 | CDK17    |
| NR3C1 | CDK5R1   |
| NR3C1 | CDK5RAP3 |
| NR3C1 | CDKN1B   |
| NR3C1 | CELF1    |
| NR3C1 | CENPC    |
| NR3C1 | CENPE    |
| NR3C1 | CEP164   |
| NR3C1 | CEP44    |
| NR3C1 | CEP55    |
| NR3C1 | CEP57    |
| NR3C1 | CEP57L1  |
| NR3C1 | CEP78    |
| NR3C1 | CEPT1    |
| NR3C1 | CETN3    |
| NR3C1 | CFAP36   |
| NR3C1 | CHAMP1   |
| NR3C1 | CHD4     |
| NR3C1 | CHD7     |
| NR3C1 | CHFR     |
| NR3C1 | CHRNA1   |
| NR3C1 | CHST10   |
| NR3C1 | CIRBP    |
| NR3C1 | CKLF     |
| NR3C1 | CKS2     |
| NR3C1 | CLIP1    |
| NR3C1 | CLK1     |
| NR3C1 | CLK3     |
| NR3C1 | CLN6     |
| NR3C1 | CLSTN1   |
| NR3C1 | CMPK2    |
| NR3C1 | CNIH1    |
| NR3C1 | CNOT2    |

|       |         |
|-------|---------|
| NR3C1 | CNOT4   |
| NR3C1 | CNOT6   |
| NR3C1 | CNOT8   |
| NR3C1 | CNPPD1  |
| NR3C1 | COASY   |
| NR3C1 | COMMD10 |
| NR3C1 | COMMD3  |
| NR3C1 | COMMD6  |
| NR3C1 | COPS3   |
| NR3C1 | COQ10B  |
| NR3C1 | COX4I1  |
| NR3C1 | CPNE1   |
| NR3C1 | CREBBP  |
| NR3C1 | CREM    |
| NR3C1 | CRIP1   |
| NR3C1 | CRYZL1  |
| NR3C1 | CSDE1   |
| NR3C1 | CSF1    |
| NR3C1 | CSK     |
| NR3C1 | CSNK1D  |
| NR3C1 | CSTF2   |
| NR3C1 | CSTF2T  |
| NR3C1 | CTPS2   |
| NR3C1 | CTSH    |
| NR3C1 | CUEDC2  |
| NR3C1 | CUL4A   |
| NR3C1 | CUX1    |
| NR3C1 | CWC25   |
| NR3C1 | CXCR4   |
| NR3C1 | CXorf56 |
| NR3C1 | CYP2R1  |
| NR3C1 | CYTH1   |
| NR3C1 | CYTH2   |
| NR3C1 | DALRD3  |
| NR3C1 | DARS    |
| NR3C1 | DBR1    |
| NR3C1 | DCAF11  |
| NR3C1 | DCK     |
| NR3C1 | DCP1A   |
| NR3C1 | DCP2    |
| NR3C1 | DCTN2   |
| NR3C1 | DDIAS   |
| NR3C1 | DDX17   |
| NR3C1 | DDX3Y   |
| NR3C1 | DDX5    |
| NR3C1 | DDX6    |
| NR3C1 | DEGS1   |
| NR3C1 | DENND3  |
| NR3C1 | DEPDC5  |
| NR3C1 | DGCR2   |

|       |         |
|-------|---------|
| NR3C1 | DGCR6L  |
| NR3C1 | DGKZ    |
| NR3C1 | DGU0K   |
| NR3C1 | DHRS1   |
| NR3C1 | DHRS11  |
| NR3C1 | DHX40   |
| NR3C1 | DIMT1   |
| NR3C1 | DLGAP5  |
| NR3C1 | DMAP1   |
| NR3C1 | DMTF1   |
| NR3C1 | DMXL1   |
| NR3C1 | DNAJB2  |
| NR3C1 | DNAJB6  |
| NR3C1 | DNAJC7  |
| NR3C1 | DNAL4   |
| NR3C1 | DNER    |
| NR3C1 | DOK1    |
| NR3C1 | DPY30   |
| NR3C1 | DTD1    |
| NR3C1 | DTWD1   |
| NR3C1 | DUSP11  |
| NR3C1 | DUSP5   |
| NR3C1 | DYNC1H1 |
| NR3C1 | DYNC1I2 |
| NR3C1 | DYNLL2  |
| NR3C1 | DZIP3   |
| NR3C1 | EBF1    |
| NR3C1 | ECE1    |
| NR3C1 | ECH1    |
| NR3C1 | EEF1A1  |
| NR3C1 | EEF1D   |
| NR3C1 | EEF2    |
| NR3C1 | EEFSEC  |
| NR3C1 | EFHC1   |
| NR3C1 | EGR3    |
| NR3C1 | EHD1    |
| NR3C1 | EIF1    |
| NR3C1 | EIF1B   |
| NR3C1 | EIF3H   |
| NR3C1 | EIF3L   |
| NR3C1 | EIF4A2  |
| NR3C1 | EIF4B   |
| NR3C1 | ELAC2   |
| NR3C1 | ELF1    |
| NR3C1 | ELF2    |
| NR3C1 | ELK4    |
| NR3C1 | ELMOD3  |
| NR3C1 | ELOVL5  |
| NR3C1 | ENDOV   |
| NR3C1 | ENSA    |

|       |           |
|-------|-----------|
| NR3C1 | EPC1      |
| NR3C1 | ERBIN     |
| NR3C1 | ERCC6L    |
| NR3C1 | ESD       |
| NR3C1 | EZR       |
| NR3C1 | FAF1      |
| NR3C1 | FAM107B   |
| NR3C1 | FAM111A   |
| NR3C1 | FAM172A   |
| NR3C1 | FAM184B   |
| NR3C1 | FAM20B    |
| NR3C1 | FAM213A   |
| NR3C1 | FAM49A    |
| NR3C1 | FAM49B    |
| NR3C1 | FAM72C    |
| NR3C1 | FAM76B    |
| NR3C1 | FAM98C    |
| NR3C1 | FANCD2    |
| NR3C1 | FAU       |
| NR3C1 | FBXL17    |
| NR3C1 | FBXL5     |
| NR3C1 | FBX030    |
| NR3C1 | FBX046    |
| NR3C1 | FBX048    |
| NR3C1 | FBX07     |
| NR3C1 | FBX09     |
| NR3C1 | FCH01     |
| NR3C1 | FCHSD2    |
| NR3C1 | FCRL3     |
| NR3C1 | FEM1A     |
| NR3C1 | FEM1B     |
| NR3C1 | FERMT3    |
| NR3C1 | FGD5-AS1  |
| NR3C1 | FHIT      |
| NR3C1 | FHOD3     |
| NR3C1 | FLYWCH2   |
| NR3C1 | FNBP1     |
| NR3C1 | FOX01     |
| NR3C1 | FYTTD1    |
| NR3C1 | GABARAPL2 |
| NR3C1 | GALNT6    |
| NR3C1 | GATAD2A   |
| NR3C1 | GCA       |
| NR3C1 | GCC2      |
| NR3C1 | GCDH      |
| NR3C1 | GCNT1     |
| NR3C1 | GCNT2     |
| NR3C1 | GFOD1     |
| NR3C1 | GGNBP2    |
| NR3C1 | GGPS1     |

|       |          |
|-------|----------|
| NR3C1 | GID8     |
| NR3C1 | GIGYF2   |
| NR3C1 | GLYR1    |
| NR3C1 | GNAI3    |
| NR3C1 | GNPAT    |
| NR3C1 | GOLGA7   |
| NR3C1 | GPALPP1  |
| NR3C1 | GPATCH8  |
| NR3C1 | GPBP1    |
| NR3C1 | GPBP1L1  |
| NR3C1 | GPHN     |
| NR3C1 | GPN3     |
| NR3C1 | GPR143   |
| NR3C1 | GPRC5C   |
| NR3C1 | GPS2     |
| NR3C1 | GRAMD1B  |
| NR3C1 | GRB2     |
| NR3C1 | GSK3A    |
| NR3C1 | GSKIP    |
| NR3C1 | GSTA4    |
| NR3C1 | GTF2F1   |
| NR3C1 | GTF2I    |
| NR3C1 | GUSB     |
| NR3C1 | HACD2    |
| NR3C1 | HAGH     |
| NR3C1 | HAUS4    |
| NR3C1 | HECTD4   |
| NR3C1 | HELZ     |
| NR3C1 | HENMT1   |
| NR3C1 | HERC4    |
| NR3C1 | HERPUD2  |
| NR3C1 | HES6     |
| NR3C1 | HHLA3    |
| NR3C1 | HIF1A    |
| NR3C1 | HJURP    |
| NR3C1 | HK1      |
| NR3C1 | HLA-DMB  |
| NR3C1 | HLA-DPA1 |
| NR3C1 | HLA-DPB1 |
| NR3C1 | HMGN1    |
| NR3C1 | HMMR     |
| NR3C1 | HNRNPA0  |
| NR3C1 | HNRNPH2  |
| NR3C1 | HNRNPUL1 |
| NR3C1 | HNRNPUL2 |
| NR3C1 | HOPX     |
| NR3C1 | HOXB7    |
| NR3C1 | HSDL1    |
| NR3C1 | HSF1     |
| NR3C1 | HSPA6    |

|       |            |
|-------|------------|
| NR3C1 | HSPBAP1    |
| NR3C1 | HSPH1      |
| NR3C1 | HTR3A      |
| NR3C1 | IDH3B      |
| NR3C1 | IER3       |
| NR3C1 | IFNGR2     |
| NR3C1 | IFT74      |
| NR3C1 | IGF2BP3    |
| NR3C1 | IKZF1      |
| NR3C1 | IKZF3      |
| NR3C1 | IKZF5      |
| NR3C1 | IL7        |
| NR3C1 | IMPACT     |
| NR3C1 | ING3       |
| NR3C1 | ING4       |
| NR3C1 | INIP       |
| NR3C1 | IN080      |
| NR3C1 | INPP5K     |
| NR3C1 | INTS6      |
| NR3C1 | IP6K2      |
| NR3C1 | IP013      |
| NR3C1 | IQCB1      |
| NR3C1 | IQSEC1     |
| NR3C1 | IST1       |
| NR3C1 | ISYNA1     |
| NR3C1 | ITSN2      |
| NR3C1 | IZUM04     |
| NR3C1 | JAK1       |
| NR3C1 | JDP2       |
| NR3C1 | JMJD1C     |
| NR3C1 | JMY        |
| NR3C1 | KANSL1     |
| NR3C1 | KANSL1-AS1 |
| NR3C1 | KAT6A      |
| NR3C1 | KATNB1     |
| NR3C1 | KATNBL1    |
| NR3C1 | KBTBD8     |
| NR3C1 | KDM5A      |
| NR3C1 | KHDRBS1    |
| NR3C1 | KIAA1217   |
| NR3C1 | KIAA2026   |
| NR3C1 | KIF14      |
| NR3C1 | KIF3A      |
| NR3C1 | KIF5B      |
| NR3C1 | KLF12      |
| NR3C1 | KLF6       |
| NR3C1 | KLHDC2     |
| NR3C1 | KLHDC3     |
| NR3C1 | KLHL14     |
| NR3C1 | KLHL5      |



|       |           |
|-------|-----------|
| NR3C1 | KMT2E     |
| NR3C1 | KPNA5     |
| NR3C1 | KPNA6     |
| NR3C1 | KRAS      |
| NR3C1 | KRCC1     |
| NR3C1 | KTN1      |
| NR3C1 | KYAT1     |
| NR3C1 | LAMTOR5   |
| NR3C1 | LASP1     |
| NR3C1 | LAT2      |
| NR3C1 | LHPP      |
| NR3C1 | LIMA1     |
| NR3C1 | LINC00909 |
| NR3C1 | LINC01152 |
| NR3C1 | LINC01184 |
| NR3C1 | LM02      |
| NR3C1 | LONRF1    |
| NR3C1 | LPAR5     |
| NR3C1 | LPIN1     |
| NR3C1 | LPXN      |
| NR3C1 | LRRC20    |
| NR3C1 | LRRC41    |
| NR3C1 | LRRFIP1   |
| NR3C1 | LRSAM1    |
| NR3C1 | LSM8      |
| NR3C1 | LTA4H     |
| NR3C1 | LUC7L3    |
| NR3C1 | LYRM2     |
| NR3C1 | MAD2L1    |
| NR3C1 | MAFG      |
| NR3C1 | MAGED2    |
| NR3C1 | MAP2K1    |
| NR3C1 | MAP2K4    |
| NR3C1 | MAP3K7CL  |
| NR3C1 | MAP4K3    |
| NR3C1 | MAPK10    |
| NR3C1 | MAPK3     |
| NR3C1 | MARCH7    |
| NR3C1 | MARK2     |
| NR3C1 | MCOLN2    |
| NR3C1 | MDH1      |
| NR3C1 | MDM4      |
| NR3C1 | MEAF6     |
| NR3C1 | METAP2    |
| NR3C1 | METTL14   |
| NR3C1 | METTL15   |
| NR3C1 | METTL17   |
| NR3C1 | METTL9    |
| NR3C1 | MFAP1     |
| NR3C1 | MFSD3     |

|       |         |
|-------|---------|
| NR3C1 | MGRN1   |
| NR3C1 | MICAL3  |
| NR3C1 | MID1IP1 |
| NR3C1 | MKNK2   |
| NR3C1 | MKRN2   |
| NR3C1 | MME     |
| NR3C1 | MOB1A   |
| NR3C1 | MOB4    |
| NR3C1 | MORF4L1 |
| NR3C1 | MPLKIP  |
| NR3C1 | MRPS14  |
| NR3C1 | MRPS31  |
| NR3C1 | MSL3    |
| NR3C1 | MTA3    |
| NR3C1 | MTCH2   |
| NR3C1 | MTF2    |
| NR3C1 | MT01    |
| NR3C1 | MYBBP1A |
| NR3C1 | MYEF2   |
| NR3C1 | MYH9    |
| NR3C1 | MYL12A  |
| NR3C1 | MYL12B  |
| NR3C1 | MY01C   |
| NR3C1 | MY01E   |
| NR3C1 | MY09A   |
| NR3C1 | N4BP2L2 |
| NR3C1 | NAA15   |
| NR3C1 | NAP1L4  |
| NR3C1 | NARS2   |
| NR3C1 | NCAPG2  |
| NR3C1 | NCAPH   |
| NR3C1 | NCBP2   |
| NR3C1 | NC0A3   |
| NR3C1 | NCOR1   |
| NR3C1 | NDE1    |
| NR3C1 | NDUFA10 |
| NR3C1 | NDUFS1  |
| NR3C1 | NEK6    |
| NR3C1 | NEK8    |
| NR3C1 | NEK9    |
| NR3C1 | NELFA   |
| NR3C1 | NFATC2  |
| NR3C1 | NFATC3  |
| NR3C1 | NFE2L1  |
| NR3C1 | NFE2L2  |
| NR3C1 | NFKBIA  |
| NR3C1 | NFKBID  |
| NR3C1 | NIF3L1  |
| NR3C1 | NINJ2   |
| NR3C1 | NIPAL3  |

|       |          |
|-------|----------|
| NR3C1 | NIPBL    |
| NR3C1 | NKTR     |
| NR3C1 | NME6     |
| NR3C1 | NMI      |
| NR3C1 | NMRAL1   |
| NR3C1 | NNT      |
| NR3C1 | NOL9     |
| NR3C1 | NONO     |
| NR3C1 | NPAS1    |
| NR3C1 | NPRL3    |
| NR3C1 | NR3C1    |
| NR3C1 | NSMCE2   |
| NR3C1 | NT5DC1   |
| NR3C1 | NUB1     |
| NR3C1 | NUCKS1   |
| NR3C1 | NUDCD1   |
| NR3C1 | NUDCD2   |
| NR3C1 | NUP107   |
| NR3C1 | NUP210   |
| NR3C1 | NUP58    |
| NR3C1 | OARD1    |
| NR3C1 | OCIAD1   |
| NR3C1 | OFD1     |
| NR3C1 | OGG1     |
| NR3C1 | OGT      |
| NR3C1 | ORC4     |
| NR3C1 | OSBPL11  |
| NR3C1 | OSBPL9   |
| NR3C1 | OSTF1    |
| NR3C1 | OTULIN   |
| NR3C1 | P4HTM    |
| NR3C1 | PABPN1   |
| NR3C1 | PAFAH1B2 |
| NR3C1 | PAFAH1B3 |
| NR3C1 | PAG1     |
| NR3C1 | PAK2     |
| NR3C1 | PAPOLA   |
| NR3C1 | PARP1    |
| NR3C1 | PAWR     |
| NR3C1 | PAX5     |
| NR3C1 | PBLD     |
| NR3C1 | PCF11    |
| NR3C1 | PCM1     |
| NR3C1 | PDCD6IP  |
| NR3C1 | PDE4B    |
| NR3C1 | PDE7A    |
| NR3C1 | PDE9A    |
| NR3C1 | PDHB     |
| NR3C1 | PDK2     |
| NR3C1 | PDK3     |

|       |          |
|-------|----------|
| NR3C1 | PDPK1    |
| NR3C1 | PDRG1    |
| NR3C1 | PDZD8    |
| NR3C1 | PEBP1    |
| NR3C1 | PEF1     |
| NR3C1 | PFN2     |
| NR3C1 | PHF20    |
| NR3C1 | PHF20L1  |
| NR3C1 | PHF21A   |
| NR3C1 | PHF6     |
| NR3C1 | PHIP     |
| NR3C1 | PHTF2    |
| NR3C1 | PIAS1    |
| NR3C1 | PIAS2    |
| NR3C1 | PIEZ01   |
| NR3C1 | PIGU     |
| NR3C1 | PIK3R1   |
| NR3C1 | PIM3     |
| NR3C1 | PINLYP   |
| NR3C1 | PIP4K2A  |
| NR3C1 | PITPNC1  |
| NR3C1 | PKHD1L1  |
| NR3C1 | PKMYT1   |
| NR3C1 | PKN1     |
| NR3C1 | PKN2     |
| NR3C1 | PLEKHF2  |
| NR3C1 | PLEKHG1  |
| NR3C1 | PLEKH01  |
| NR3C1 | PNPLA6   |
| NR3C1 | POGK     |
| NR3C1 | POLR2M   |
| NR3C1 | POR      |
| NR3C1 | POU3F1   |
| NR3C1 | PPCS     |
| NR3C1 | PPDPF    |
| NR3C1 | PPIH     |
| NR3C1 | PPIL3    |
| NR3C1 | PPIL4    |
| NR3C1 | PPP1CC   |
| NR3C1 | PPP1R12A |
| NR3C1 | PPP1R15A |
| NR3C1 | PPP1R2   |
| NR3C1 | PPP1R21  |
| NR3C1 | PPP2R1B  |
| NR3C1 | PPP2R2A  |
| NR3C1 | PPP2R5C  |
| NR3C1 | PPP2R5E  |
| NR3C1 | PPP4R3A  |
| NR3C1 | PRDM2    |
| NR3C1 | PRKACB   |

|       |           |
|-------|-----------|
| NR3C1 | PRKAR1A   |
| NR3C1 | PRKCD     |
| NR3C1 | PRMT2     |
| NR3C1 | PRMT7     |
| NR3C1 | PRPF38B   |
| NR3C1 | PRPSAP2   |
| NR3C1 | PRRC2B    |
| NR3C1 | PRRC2C    |
| NR3C1 | PSEN1     |
| NR3C1 | PSENER    |
| NR3C1 | PSIP1     |
| NR3C1 | PSMC3IP   |
| NR3C1 | PTBP3     |
| NR3C1 | PTOV1     |
| NR3C1 | PTPRC     |
| NR3C1 | PTPRS     |
| NR3C1 | PTRHD1    |
| NR3C1 | PUS10     |
| NR3C1 | PYCR2     |
| NR3C1 | QRICH1    |
| NR3C1 | R3HCC1L   |
| NR3C1 | RAB11B    |
| NR3C1 | RAB14     |
| NR3C1 | RAB21     |
| NR3C1 | RAB30     |
| NR3C1 | RAB30-AS1 |
| NR3C1 | RAB35     |
| NR3C1 | RAB5C     |
| NR3C1 | RAB8B     |
| NR3C1 | RABGAP1   |
| NR3C1 | RACK1     |
| NR3C1 | RALGAPA1  |
| NR3C1 | RALGAPA2  |
| NR3C1 | RAP1B     |
| NR3C1 | RARA      |
| NR3C1 | RASGRP3   |
| NR3C1 | RB1CC1    |
| NR3C1 | RBBP4     |
| NR3C1 | RBBP9     |
| NR3C1 | RBFA      |
| NR3C1 | RBM15     |
| NR3C1 | RBM26-AS1 |
| NR3C1 | RBMX      |
| NR3C1 | RCC1L     |
| NR3C1 | RCSD1     |
| NR3C1 | RDH13     |
| NR3C1 | RELA      |
| NR3C1 | RELB      |
| NR3C1 | REV3L     |
| NR3C1 | RFC1      |

|       |        |
|-------|--------|
| NR3C1 | RFT1   |
| NR3C1 | RFTN1  |
| NR3C1 | RFX1   |
| NR3C1 | RGS10  |
| NR3C1 | RH0A   |
| NR3C1 | RH0G   |
| NR3C1 | RH0H   |
| NR3C1 | RIC3   |
| NR3C1 | RIT1   |
| NR3C1 | RMDN3  |
| NR3C1 | RNF10  |
| NR3C1 | RNF167 |
| NR3C1 | RNF187 |
| NR3C1 | RNF219 |
| NR3C1 | RNF4   |
| NR3C1 | RNF40  |
| NR3C1 | RNF41  |
| NR3C1 | ROCK1  |
| NR3C1 | RP2    |
| NR3C1 | RPA1   |
| NR3C1 | RPAP2  |
| NR3C1 | RPL10  |
| NR3C1 | RPL10A |
| NR3C1 | RPL12  |
| NR3C1 | RPL13A |
| NR3C1 | RPL15  |
| NR3C1 | RPL17  |
| NR3C1 | RPL18  |
| NR3C1 | RPL18A |
| NR3C1 | RPL21  |
| NR3C1 | RPL23  |
| NR3C1 | RPL23A |
| NR3C1 | RPL24  |
| NR3C1 | RPL26  |
| NR3C1 | RPL27A |
| NR3C1 | RPL28  |
| NR3C1 | RPL3   |
| NR3C1 | RPL30  |
| NR3C1 | RPL32  |
| NR3C1 | RPL34  |
| NR3C1 | RPL35A |
| NR3C1 | RPL39  |
| NR3C1 | RPL4   |
| NR3C1 | RPL41  |
| NR3C1 | RPL6   |
| NR3C1 | RPL7   |
| NR3C1 | RPL8   |
| NR3C1 | RPL9   |
| NR3C1 | RPLP0  |
| NR3C1 | RPS11  |

|       |         |
|-------|---------|
| NR3C1 | RPS13   |
| NR3C1 | RPS15   |
| NR3C1 | RPS15A  |
| NR3C1 | RPS16   |
| NR3C1 | RPS18   |
| NR3C1 | RPS19   |
| NR3C1 | RPS2    |
| NR3C1 | RPS20   |
| NR3C1 | RPS23   |
| NR3C1 | RPS27   |
| NR3C1 | RPS27A  |
| NR3C1 | RPS28   |
| NR3C1 | RPS3A   |
| NR3C1 | RPS5    |
| NR3C1 | RPS6    |
| NR3C1 | RPS7    |
| NR3C1 | RPS8    |
| NR3C1 | RPS9    |
| NR3C1 | RRAGA   |
| NR3C1 | RRAGC   |
| NR3C1 | RSBN1   |
| NR3C1 | RSF1    |
| NR3C1 | RSL24D1 |
| NR3C1 | RSPH3   |
| NR3C1 | RTF1    |
| NR3C1 | RUBCN   |
| NR3C1 | RUFY3   |
| NR3C1 | RUSC1   |
| NR3C1 | RXRB    |
| NR3C1 | SAFB2   |
| NR3C1 | SAP30   |
| NR3C1 | SBF2    |
| NR3C1 | SCAF1   |
| NR3C1 | SCAF11  |
| NR3C1 | SCAMP1  |
| NR3C1 | SCAND1  |
| NR3C1 | SCARB1  |
| NR3C1 | SCCPDH  |
| NR3C1 | SCRN1   |
| NR3C1 | SDCBP   |
| NR3C1 | SDCCAG8 |
| NR3C1 | SEC23A  |
| NR3C1 | SEMA4A  |
| NR3C1 | SENP2   |
| NR3C1 | SEPHS2  |
| NR3C1 | SEPT2   |
| NR3C1 | SERINC3 |
| NR3C1 | SESN3   |
| NR3C1 | SESTD1  |
| NR3C1 | SETX    |

|       |          |
|-------|----------|
| NR3C1 | SF1      |
| NR3C1 | SFI1     |
| NR3C1 | SGF29    |
| NR3C1 | SG01     |
| NR3C1 | SGSM2    |
| NR3C1 | SH2B1    |
| NR3C1 | SH3BGRL  |
| NR3C1 | SH3BP5   |
| NR3C1 | SH3GLB1  |
| NR3C1 | SH3KBP1  |
| NR3C1 | SHISA8   |
| NR3C1 | SHOC2    |
| NR3C1 | SLC10A3  |
| NR3C1 | SLC11A2  |
| NR3C1 | SLC15A4  |
| NR3C1 | SLC1A1   |
| NR3C1 | SLC25A19 |
| NR3C1 | SLC25A3  |
| NR3C1 | SLC25A33 |
| NR3C1 | SLC46A3  |
| NR3C1 | SLC7A1   |
| NR3C1 | SLTM     |
| NR3C1 | SLU7     |
| NR3C1 | SMAP2    |
| NR3C1 | SMARCA5  |
| NR3C1 | SMARCA5  |
| NR3C1 | SMARCA5  |
| NR3C1 | SMARCC2  |
| NR3C1 | SMARCC2  |
| NR3C1 | SMARCC2  |
| NR3C1 | SMARCD2  |
| NR3C1 | SMARCD2  |
| NR3C1 | SMARCD2  |
| NR3C1 | SMC5     |
| NR3C1 | SMCHD1   |
| NR3C1 | SMIM14   |
| NR3C1 | SMIM7    |
| NR3C1 | SNAP23   |
| NR3C1 | SNRNP35  |
| NR3C1 | SNX1     |
| NR3C1 | SNX2     |
| NR3C1 | SNX7     |
| NR3C1 | S0CS1    |
| NR3C1 | SOD1     |
| NR3C1 | SON      |
| NR3C1 | SORL1    |
| NR3C1 | SPAG16   |
| NR3C1 | SPECC1   |
| NR3C1 | SPG11    |
| NR3C1 | SPHK2    |
| NR3C1 | SPI1     |
| NR3C1 | SPON1    |
| NR3C1 | SPSB3    |
| NR3C1 | SREK1    |
| NR3C1 | SRP14    |



|       |           |
|-------|-----------|
| NR3C1 | SRRT      |
| NR3C1 | SRSF5     |
| NR3C1 | SSU72     |
| NR3C1 | STAG2     |
| NR3C1 | STAT3     |
| NR3C1 | STAT5B    |
| NR3C1 | STIM2     |
| NR3C1 | STK38L    |
| NR3C1 | STK4      |
| NR3C1 | STUB1     |
| NR3C1 | STX18     |
| NR3C1 | STXBP3    |
| NR3C1 | SUDS3     |
| NR3C1 | SUPT4H1   |
| NR3C1 | SUV39H1   |
| NR3C1 | SUV39H2   |
| NR3C1 | SVBP      |
| NR3C1 | SWAP70    |
| NR3C1 | SYAP1     |
| NR3C1 | SYBU      |
| NR3C1 | SYMPK     |
| NR3C1 | SYNGR2    |
| NR3C1 | TAF12     |
| NR3C1 | TAF15     |
| NR3C1 | TAF1D     |
| NR3C1 | TAF7      |
| NR3C1 | TAF8      |
| NR3C1 | TANK      |
| NR3C1 | TAOK1     |
| NR3C1 | TARDBP    |
| NR3C1 | TATDN2    |
| NR3C1 | TBC1D22A  |
| NR3C1 | TBC1D4    |
| NR3C1 | TBCA      |
| NR3C1 | TBCB      |
| NR3C1 | TBL1XR1   |
| NR3C1 | TCEAL4    |
| NR3C1 | TEX261    |
| NR3C1 | TEX9      |
| NR3C1 | TFEB      |
| NR3C1 | TFRC      |
| NR3C1 | TGIF1     |
| NR3C1 | TGOLN2    |
| NR3C1 | THAP11    |
| NR3C1 | THAP9-AS1 |
| NR3C1 | THEM6     |
| NR3C1 | THOC2     |
| NR3C1 | TIAL1     |
| NR3C1 | TIMM10B   |
| NR3C1 | TIPARP    |

|       |          |
|-------|----------|
| NR3C1 | TLE4     |
| NR3C1 | TLR10    |
| NR3C1 | TM6SF1   |
| NR3C1 | TMC6     |
| NR3C1 | TMED8    |
| NR3C1 | TMEM101  |
| NR3C1 | TMEM102  |
| NR3C1 | TMEM123  |
| NR3C1 | TMEM14A  |
| NR3C1 | TMEM167B |
| NR3C1 | TMEM18   |
| NR3C1 | TMEM185A |
| NR3C1 | TMEM216  |
| NR3C1 | TMEM218  |
| NR3C1 | TMEM219  |
| NR3C1 | TMEM38B  |
| NR3C1 | TMEM60   |
| NR3C1 | TMEM80   |
| NR3C1 | TMEM97   |
| NR3C1 | TMSB4X   |
| NR3C1 | TMUB2    |
| NR3C1 | TNIP1    |
| NR3C1 | TNP03    |
| NR3C1 | TOLLIP   |
| NR3C1 | TOMM5    |
| NR3C1 | TOPORS   |
| NR3C1 | TOX      |
| NR3C1 | TPCN1    |
| NR3C1 | TPGS1    |
| NR3C1 | TRABD    |
| NR3C1 | TRAF5    |
| NR3C1 | TRAPPC8  |
| NR3C1 | TRIM13   |
| NR3C1 | TRIM44   |
| NR3C1 | TRIM52   |
| NR3C1 | TRIM8    |
| NR3C1 | TRIP11   |
| NR3C1 | TRIQK    |
| NR3C1 | TROVE2   |
| NR3C1 | TSC22D2  |
| NR3C1 | TSC22D3  |
| NR3C1 | TSG101   |
| NR3C1 | TSGA10   |
| NR3C1 | TSPAN14  |
| NR3C1 | TSPAN33  |
| NR3C1 | TSP0     |
| NR3C1 | TTC14    |
| NR3C1 | TTC30A   |
| NR3C1 | TTC31    |
| NR3C1 | TTI2     |

|       |         |
|-------|---------|
| NR3C1 | TUBGCP5 |
| NR3C1 | TWF2    |
| NR3C1 | U2AF2   |
| NR3C1 | UACA    |
| NR3C1 | UBA2    |
| NR3C1 | UBAP2   |
| NR3C1 | UBAP2L  |
| NR3C1 | UBC     |
| NR3C1 | UBE2D2  |
| NR3C1 | UBE2J2  |
| NR3C1 | UBE2K   |
| NR3C1 | UBE2R2  |
| NR3C1 | UBP1    |
| NR3C1 | UBR5    |
| NR3C1 | UBXN7   |
| NR3C1 | UCHL5   |
| NR3C1 | UGP2    |
| NR3C1 | UNG     |
| NR3C1 | UPF2    |
| NR3C1 | USP10   |
| NR3C1 | USP13   |
| NR3C1 | USP22   |
| NR3C1 | USP48   |
| NR3C1 | USP6NL  |
| NR3C1 | UVRAG   |
| NR3C1 | VAC14   |
| NR3C1 | VAMP2   |
| NR3C1 | VAMP8   |
| NR3C1 | VASP    |
| NR3C1 | VEZT    |
| NR3C1 | VPS28   |
| NR3C1 | VPS4B   |
| NR3C1 | VRK2    |
| NR3C1 | VTI1B   |
| NR3C1 | WAC     |
| NR3C1 | WAPL    |
| NR3C1 | WASF2   |
| NR3C1 | WDFY1   |
| NR3C1 | WDR1    |
| NR3C1 | WDR34   |
| NR3C1 | WDR77   |
| NR3C1 | WIPF1   |
| NR3C1 | WNK1    |
| NR3C1 | WRB     |
| NR3C1 | WSB1    |
| NR3C1 | XIAP    |
| NR3C1 | XRN2    |
| NR3C1 | YBEY    |
| NR3C1 | YKT6    |
| NR3C1 | YWHAZ   |

|       |             |
|-------|-------------|
| NR3C1 | YY1         |
| NR3C1 | ZBTB20      |
| NR3C1 | ZC3H14      |
| NR3C1 | ZCCHC3      |
| NR3C1 | ZCCHC7      |
| NR3C1 | ZDHHC2      |
| NR3C1 | ZDHHC20     |
| NR3C1 | ZDHHC21     |
| NR3C1 | ZDHHC24     |
| NR3C1 | ZFAND5      |
| NR3C1 | ZFAS1       |
| NR3C1 | ZFC3H1      |
| NR3C1 | ZFR         |
| NR3C1 | ZFX         |
| NR3C1 | ZGRF1       |
| NR3C1 | ZMYM2       |
| NR3C1 | ZNF101      |
| NR3C1 | ZNF106      |
| NR3C1 | ZNF131      |
| NR3C1 | ZNF184      |
| NR3C1 | ZNF226      |
| NR3C1 | ZNF24       |
| NR3C1 | ZNF254      |
| NR3C1 | ZNF267      |
| NR3C1 | ZNF280D     |
| NR3C1 | ZNF292      |
| NR3C1 | ZNF500      |
| NR3C1 | ZNF518A     |
| NR3C1 | ZNF580      |
| NR3C1 | ZNF638      |
| NR3C1 | ZNF644      |
| NR3C1 | ZNF681      |
| NR3C1 | ZNF75A      |
| NR3C1 | ZSCAN16-AS1 |
| NRF1  | ACSF3       |
| NRF1  | ACTR1B      |
| NRF1  | ALDOA       |
| NRF1  | ALKBH4      |
| NRF1  | ANLN        |
| NRF1  | APC         |
| NRF1  | ARFGEF1     |
| NRF1  | ARHGAP1     |
| NRF1  | ARHGAP17    |
| NRF1  | ARL17A      |
| NRF1  | ARL3        |
| NRF1  | ARMC1       |
| NRF1  | ARPC1A      |
| NRF1  | ATXN2L      |
| NRF1  | AURKA       |
| NRF1  | BANP        |

|      |          |
|------|----------|
| NRF1 | BLK      |
| NRF1 | C12orf65 |
| NRF1 | C5orf15  |
| NRF1 | CBX1     |
| NRF1 | CCDC71   |
| NRF1 | CCNB1    |
| NRF1 | CCNF     |
| NRF1 | CDCA3    |
| NRF1 | CDK14    |
| NRF1 | CDK6     |
| NRF1 | CDKAL1   |
| NRF1 | CENPF    |
| NRF1 | CFL2     |
| NRF1 | CKAP2    |
| NRF1 | CKAP5    |
| NRF1 | CKS1B    |
| NRF1 | C0Q9     |
| NRF1 | DPF1     |
| NRF1 | DSN1     |
| NRF1 | EBF1     |
| NRF1 | EFTUD2   |
| NRF1 | EHD3     |
| NRF1 | EPS15L1  |
| NRF1 | ESC01    |
| NRF1 | FKBP4    |
| NRF1 | GNL3L    |
| NRF1 | GPSM2    |
| NRF1 | GSS      |
| NRF1 | GTF2A1   |
| NRF1 | HERPUD2  |
| NRF1 | HIRIP3   |
| NRF1 | HSPA8    |
| NRF1 | INPP5F   |
| NRF1 | ITGA4    |
| NRF1 | KDM1B    |
| NRF1 | KDM4A    |
| NRF1 | KIF14    |
| NRF1 | KIF2A    |
| NRF1 | KIF2C    |
| NRF1 | LPCAT1   |
| NRF1 | LRIF1    |
| NRF1 | M6PR     |
| NRF1 | MAEA     |
| NRF1 | MAF1     |
| NRF1 | MED13L   |
| NRF1 | MRGBP    |
| NRF1 | MXD4     |
| NRF1 | NARFL    |
| NRF1 | NRF1     |
| NRF1 | NUP153   |

|      |           |
|------|-----------|
| NRF1 | PACS1     |
| NRF1 | PAGR1     |
| NRF1 | PDLIM7    |
| NRF1 | PHTF2     |
| NRF1 | PIGH      |
| NRF1 | PLK1      |
| NRF1 | PPTC7     |
| NRF1 | PRKAR2B   |
| NRF1 | PRMT1     |
| NRF1 | PSMA3-AS1 |
| NRF1 | RACGAP1   |
| NRF1 | RAD21     |
| NRF1 | RBBP5     |
| NRF1 | RBM12     |
| NRF1 | RBM27     |
| NRF1 | RCSD1     |
| NRF1 | RDM1      |
| NRF1 | REEP4     |
| NRF1 | RGS12     |
| NRF1 | RGS3      |
| NRF1 | RGS9      |
| NRF1 | RHOF      |
| NRF1 | RNF14     |
| NRF1 | RTCA      |
| NRF1 | SCP2      |
| NRF1 | SENP2     |
| NRF1 | SEPT11    |
| NRF1 | SGPP1     |
| NRF1 | SLK       |
| NRF1 | SOX5      |
| NRF1 | SPC24     |
| NRF1 | SPN       |
| NRF1 | STK10     |
| NRF1 | STRADA    |
| NRF1 | SUV39H2   |
| NRF1 | TBC1D10B  |
| NRF1 | TBC1D22A  |
| NRF1 | TBL1XR1   |
| NRF1 | TEL02     |
| NRF1 | TFEB      |
| NRF1 | TGIF2     |
| NRF1 | TINF2     |
| NRF1 | TMEM19    |
| NRF1 | TMEM41B   |
| NRF1 | TOMM70    |
| NRF1 | TTC17     |
| NRF1 | TUBB4B    |
| NRF1 | UBE2S     |
| NRF1 | UBE2T     |
| NRF1 | UCK2      |

|       |          |
|-------|----------|
| NRF1  | USP3     |
| NRF1  | VPS16    |
| NRF1  | WDR5     |
| NRF1  | WNT2B    |
| NRF1  | ZC3H14   |
| NRF1  | ZNF420   |
| PATZ1 | ARHGAP33 |
| PATZ1 | ARID3A   |
| PATZ1 | H00K2    |
| PATZ1 | IGSF8    |
| PATZ1 | MTPAP    |
| PATZ1 | NAMPT    |
| PAX5  | ACAP2    |
| PAX5  | ACTB     |
| PAX5  | ACTR2    |
| PAX5  | AFF3     |
| PAX5  | ALOX5AP  |
| PAX5  | AP1B1    |
| PAX5  | APBB1IP  |
| PAX5  | APC      |
| PAX5  | APH1A    |
| PAX5  | ARHGAP25 |
| PAX5  | ARHGAP26 |
| PAX5  | ARHGAP30 |
| PAX5  | ARHGDIB  |
| PAX5  | ARID1B   |
| PAX5  | ARPC1B   |
| PAX5  | ARPC2    |
| PAX5  | ARPC4    |
| PAX5  | B9D2     |
| PAX5  | BCL11A   |
| PAX5  | BCL3     |
| PAX5  | BDH1     |
| PAX5  | BIN3     |
| PAX5  | BLNK     |
| PAX5  | BMF      |
| PAX5  | BRCA1    |
| PAX5  | BRK1     |
| PAX5  | BTG1     |
| PAX5  | CACNA1A  |
| PAX5  | CAT      |
| PAX5  | CBL      |
| PAX5  | CCDC88B  |
| PAX5  | CCNT2    |
| PAX5  | CD37     |
| PAX5  | CD72     |
| PAX5  | CD79B    |
| PAX5  | CDK13    |
| PAX5  | CELF2    |
| PAX5  | CHD3     |

|      |          |
|------|----------|
| PAX5 | CHERP    |
| PAX5 | CNN2     |
| PAX5 | CN0T3    |
| PAX5 | CNR2     |
| PAX5 | COR01A   |
| PAX5 | CREBRF   |
| PAX5 | CSK      |
| PAX5 | CSNK1G1  |
| PAX5 | CTCF     |
| PAX5 | CTDSP2   |
| PAX5 | CUEDC2   |
| PAX5 | CXXC5    |
| PAX5 | CYB561A3 |
| PAX5 | CYFIP2   |
| PAX5 | DCAF12   |
| PAX5 | DCAF7    |
| PAX5 | DMXL1    |
| PAX5 | E2F3     |
| PAX5 | EHD1     |
| PAX5 | EHD4     |
| PAX5 | EIF2B2   |
| PAX5 | ELOVL5   |
| PAX5 | EPS15    |
| PAX5 | ETS1     |
| PAX5 | EXOC1    |
| PAX5 | FAM126A  |
| PAX5 | FAM172A  |
| PAX5 | FBX011   |
| PAX5 | FCRL3    |
| PAX5 | FCRL5    |
| PAX5 | FCRLA    |
| PAX5 | FJX1     |
| PAX5 | FKBP15   |
| PAX5 | FNBP1    |
| PAX5 | GAS7     |
| PAX5 | GATAD2B  |
| PAX5 | GATB     |
| PAX5 | GFOD1    |
| PAX5 | GIT2     |
| PAX5 | GLUL     |
| PAX5 | GNAS     |
| PAX5 | GPR18    |
| PAX5 | GPSM3    |
| PAX5 | GRB2     |
| PAX5 | GSAP     |
| PAX5 | GTF2I    |
| PAX5 | GYG1     |
| PAX5 | HDAC7    |
| PAX5 | HLA-DMB  |
| PAX5 | IFI30    |



|      |          |
|------|----------|
| PAX5 | IKZF1    |
| PAX5 | IKZF3    |
| PAX5 | IL16     |
| PAX5 | IL6R     |
| PAX5 | INIP     |
| PAX5 | INPP5D   |
| PAX5 | IRF5     |
| PAX5 | ITGAL    |
| PAX5 | ITPR1    |
| PAX5 | ITPRIPL1 |
| PAX5 | ITSN2    |
| PAX5 | JDP2     |
| PAX5 | KIAA0040 |
| PAX5 | LCP1     |
| PAX5 | LILRB1   |
| PAX5 | LIMA1    |
| PAX5 | LIMD2    |
| PAX5 | LMNA     |
| PAX5 | LPAR5    |
| PAX5 | LYN      |
| PAX5 | MAP3K14  |
| PAX5 | MBD5     |
| PAX5 | MBNL1    |
| PAX5 | MEF2A    |
| PAX5 | MEF2C    |
| PAX5 | MKL1     |
| PAX5 | MLEC     |
| PAX5 | MORC2    |
| PAX5 | MRPL1    |
| PAX5 | MTPN     |
| PAX5 | MYH9     |
| PAX5 | MYO1C    |
| PAX5 | N4BP3    |
| PAX5 | NCF1     |
| PAX5 | NCF4     |
| PAX5 | NEIL3    |
| PAX5 | NEMF     |
| PAX5 | NR3C1    |
| PAX5 | NUFIP1   |
| PAX5 | NUP214   |
| PAX5 | ORC2     |
| PAX5 | OSBPL3   |
| PAX5 | OSTF1    |
| PAX5 | PDLIM1   |
| PAX5 | PDLIM2   |
| PAX5 | PGS1     |
| PAX5 | PHIP     |
| PAX5 | PIK3CA   |
| PAX5 | PIK3R4   |
| PAX5 | PITPNC1  |

|      |           |
|------|-----------|
| PAX5 | PKN1      |
| PAX5 | PLA2G15   |
| PAX5 | PLCG2     |
| PAX5 | PLEKHA2   |
| PAX5 | PLEKHB1   |
| PAX5 | POLD4     |
| PAX5 | PPP1R9B   |
| PAX5 | PPP6R1    |
| PAX5 | PRRC2C    |
| PAX5 | PSD4      |
| PAX5 | PTBP3     |
| PAX5 | PTK2B     |
| PAX5 | PTPRC     |
| PAX5 | PVT1      |
| PAX5 | RAB11FIP1 |
| PAX5 | RAC2      |
| PAX5 | RAE1      |
| PAX5 | RASSF2    |
| PAX5 | RCC2      |
| PAX5 | RCSD1     |
| PAX5 | RFTN1     |
| PAX5 | RGS3      |
| PAX5 | RHOG      |
| PAX5 | RNF141    |
| PAX5 | RNF144B   |
| PAX5 | RP2       |
| PAX5 | RPA2      |
| PAX5 | RPL28     |
| PAX5 | RPL4      |
| PAX5 | RPS18     |
| PAX5 | RPS27A    |
| PAX5 | RPS6KA1   |
| PAX5 | SAMD4B    |
| PAX5 | SCIMP     |
| PAX5 | SEC61B    |
| PAX5 | SH3BGR1   |
| PAX5 | SKIL      |
| PAX5 | SLC44A2   |
| PAX5 | SLC9A7    |
| PAX5 | SNAP23    |
| PAX5 | SNX22     |
| PAX5 | SP100     |
| PAX5 | SPAG7     |
| PAX5 | SPI1      |
| PAX5 | SSBP4     |
| PAX5 | ST3GAL2   |
| PAX5 | STAP1     |
| PAX5 | STK4      |
| PAX5 | STRADA    |
| PAX5 | STX7      |

|        |           |
|--------|-----------|
| PAX5   | SYK       |
| PAX5   | SYT17     |
| PAX5   | TADA3     |
| PAX5   | TAF6L     |
| PAX5   | TBC1D1    |
| PAX5   | TBL1X     |
| PAX5   | TCF4      |
| PAX5   | TEX261    |
| PAX5   | TFEB      |
| PAX5   | TFRC      |
| PAX5   | TIMM8A    |
| PAX5   | TLR10     |
| PAX5   | TMC8      |
| PAX5   | TMEM109   |
| PAX5   | TMEM154   |
| PAX5   | TMEM156   |
| PAX5   | TMSB4X    |
| PAX5   | TNFAIP8   |
| PAX5   | TNFRSF13C |
| PAX5   | TPRG1L    |
| PAX5   | TSPAN33   |
| PAX5   | TXNDC16   |
| PAX5   | UBE2R2    |
| PAX5   | UBP1      |
| PAX5   | UNC45A    |
| PAX5   | USP15     |
| PAX5   | USP9X     |
| PAX5   | UVRAG     |
| PAX5   | VAV1      |
| PAX5   | VEZF1     |
| PAX5   | VGLL4     |
| PAX5   | WDFY4     |
| PAX5   | YARS2     |
| PAX5   | YWHAG     |
| PAX5   | ZBTB20    |
| PAX5   | ZC3H12D   |
| PAX5   | ZNF296    |
| PBX3   | GSE1      |
| PKN0X1 | TTN       |
| PLAGL1 | BACE2     |
| PLAGL1 | CD44      |
| PLAGL1 | LDB1      |
| PLAGL1 | NFKBIZ    |
| PLAGL1 | RBPJ      |
| PLAGL1 | SH3BP5L   |
| POU2F1 | ARHGAP27  |
| POU2F1 | HIST1H2AE |
| POU2F1 | HIST1H2AG |
| POU2F1 | HIST1H2AH |
| POU2F1 | HIST1H2AJ |

|        |           |
|--------|-----------|
| POU2F1 | HIST1H2BH |
| POU2F1 | HIST1H3B  |
| POU2F1 | HIST1H3C  |
| POU2F1 | KDM3A     |
| POU2F1 | LYST      |
| POU2F1 | PLCB2     |
| POU2F1 | POU2F1    |
| POU2F1 | RBM43     |
| POU2F1 | TAB2      |
| POU2F1 | TEX261    |
| POU6F1 | ALG1      |
| POU6F1 | ANKRD17   |
| POU6F1 | ARL6IP5   |
| POU6F1 | ATF6      |
| POU6F1 | BCAR3     |
| POU6F1 | ELL       |
| POU6F1 | FAM214A   |
| POU6F1 | HIST1H2AC |
| POU6F1 | H00K2     |
| POU6F1 | NEDD9     |
| POU6F1 | POU6F1    |
| POU6F1 | RGS2      |
| POU6F1 | SSR1      |
| POU6F1 | TSPAN13   |
| PRDM1  | FKBP2     |
| PRDM1  | PRDM1     |
| REL    | AARS2     |
| REL    | AATF      |
| REL    | ABCF1     |
| REL    | ABHD6     |
| REL    | ABR       |
| REL    | ABT1      |
| REL    | ACBD6     |
| REL    | ACTN4     |
| REL    | ADARB1    |
| REL    | ADGRE5    |
| REL    | ADIPOR2   |
| REL    | ADO       |
| REL    | ADPRHL2   |
| REL    | ADRM1     |
| REL    | ADSL      |
| REL    | ADSS      |
| REL    | AGFG1     |
| REL    | AGO3      |
| REL    | AHCY      |
| REL    | AHDC1     |
| REL    | AHR       |
| REL    | AHSA1     |
| REL    | AKAP12    |
| REL    | ALG3      |

|     |          |
|-----|----------|
| REL | AMD1     |
| REL | ANKRD11  |
| REL | ANKRD17  |
| REL | ANKRD33B |
| REL | ANKRD37  |
| REL | ANP32A   |
| REL | ANXA11   |
| REL | AP1AR    |
| REL | AP5Z1    |
| REL | APEX2    |
| REL | APH1A    |
| REL | APLP2    |
| REL | APMAP    |
| REL | ARCN1    |
| REL | ARF6     |
| REL | ARHGAP15 |
| REL | ARHGAP25 |
| REL | ARHGAP9  |
| REL | ARHGEF2  |
| REL | ARID1B   |
| REL | ARID4B   |
| REL | ARID5B   |
| REL | ARL6IP5  |
| REL | ARMC5    |
| REL | ARMCX6   |
| REL | ARPP19   |
| REL | ASCC1    |
| REL | ASH1L    |
| REL | ASNA1    |
| REL | ASXL1    |
| REL | ATAD1    |
| REL | ATAD3B   |
| REL | ATF4     |
| REL | ATF5     |
| REL | ATF7IP   |
| REL | ATG101   |
| REL | ATG5     |
| REL | ATL3     |
| REL | ATM      |
| REL | ATP1B3   |
| REL | ATP6AP2  |
| REL | ATP6V0A1 |
| REL | ATP6V0A2 |
| REL | ATXN1    |
| REL | ATXN10   |
| REL | ATXN2L   |
| REL | AURKAIP1 |
| REL | B3GNT7   |
| REL | BACH1    |
| REL | BACH2    |

|     |          |
|-----|----------|
| REL | BANF1    |
| REL | BASP1    |
| REL | BATF     |
| REL | BAZ1A    |
| REL | BAZ1B    |
| REL | BAZ2A    |
| REL | BBIP1    |
| REL | BCAR3    |
| REL | BCL2     |
| REL | BCL2A1   |
| REL | BCL2L1   |
| REL | BCL3     |
| REL | BCLAF1   |
| REL | BEX2     |
| REL | BEX4     |
| REL | BHLHE40  |
| REL | BHLHE41  |
| REL | BIRC3    |
| REL | BLCAP    |
| REL | BL0C1S2  |
| REL | BMS1     |
| REL | BOD1     |
| REL | BPTF     |
| REL | BRD2     |
| REL | BRPF1    |
| REL | BTAF1    |
| REL | BTF3     |
| REL | BTF3L4   |
| REL | BTG1     |
| REL | BTLA     |
| REL | BUD31    |
| REL | BZW1     |
| REL | C11orf49 |
| REL | C11orf58 |
| REL | C15orf40 |
| REL | C15orf41 |
| REL | C16orf91 |
| REL | C18orf21 |
| REL | C18orf25 |
| REL | C19orf48 |
| REL | C1orf131 |
| REL | C2orf76  |
| REL | C6orf136 |
| REL | C9orf85  |
| REL | CA8      |
| REL | CAAP1    |
| REL | CABLES1  |
| REL | CALM2    |
| REL | CAMK4    |
| REL | CAMKK1   |

|     |          |
|-----|----------|
| REL | CAND1    |
| REL | CBLL1    |
| REL | CCDC137  |
| REL | CCDC174  |
| REL | CCDC25   |
| REL | CCDC71   |
| REL | CCL3     |
| REL | CCL4     |
| REL | CCL4L2   |
| REL | CCND1    |
| REL | CCND2    |
| REL | CCNI     |
| REL | CCNK     |
| REL | CCNL1    |
| REL | CCNYL1   |
| REL | CCR7     |
| REL | CCT2     |
| REL | CCT7     |
| REL | CCZ1     |
| REL | CD109    |
| REL | CD164    |
| REL | CD200    |
| REL | CD40     |
| REL | CD48     |
| REL | CD70     |
| REL | CD80     |
| REL | CD83     |
| REL | CD86     |
| REL | CDC123   |
| REL | CDC37    |
| REL | CDC42    |
| REL | CDC42EP3 |
| REL | CDC42SE1 |
| REL | CDK11B   |
| REL | CDK7     |
| REL | CDKN2AIP |
| REL | CEBPZ    |
| REL | CELF1    |
| REL | CELF2    |
| REL | CFAP97   |
| REL | CFLAR    |
| REL | CGGBP1   |
| REL | CHCHD5   |
| REL | CHD2     |
| REL | CHD4     |
| REL | CHMP2B   |
| REL | CHMP7    |
| REL | CHST11   |
| REL | CIA01    |
| REL | CIAPIN1  |

|     |          |
|-----|----------|
| REL | CISD2    |
| REL | CKS2     |
| REL | CLEC2D   |
| REL | CLK4     |
| REL | CLPB     |
| REL | CLTA     |
| REL | CMC2     |
| REL | CMSS1    |
| REL | CMTM6    |
| REL | CNBP     |
| REL | CNDP2    |
| REL | CNIH1    |
| REL | CN0T2    |
| REL | CN0T4    |
| REL | CN0T7    |
| REL | CNST     |
| REL | COIL     |
| REL | COMMD2   |
| REL | COMMD6   |
| REL | COPS3    |
| REL | COPS5    |
| REL | COQ9     |
| REL | COX17    |
| REL | COX7A2L  |
| REL | COX7C    |
| REL | CPSF7    |
| REL | CREB1    |
| REL | CREB5    |
| REL | CREM     |
| REL | CRIM1    |
| REL | CRK      |
| REL | CRLS1    |
| REL | CSNK1D   |
| REL | CSNK2A1  |
| REL | CSNK2B   |
| REL | CTDP1    |
| REL | CTPS1    |
| REL | CUTC     |
| REL | CWC22    |
| REL | CXCR4    |
| REL | CXCR5    |
| REL | CXorf21  |
| REL | CYB561A3 |
| REL | CYC1     |
| REL | CYFIP2   |
| REL | CYLD     |
| REL | CYTH1    |
| REL | DAXX     |
| REL | DCAF10   |
| REL | DCAF4    |



|     |         |
|-----|---------|
| REL | DCAF6   |
| REL | DCAF7   |
| REL | DCP1A   |
| REL | DCP2    |
| REL | DCTN5   |
| REL | DDB1    |
| REL | DDX18   |
| REL | DDX21   |
| REL | DDX27   |
| REL | DDX3X   |
| REL | DDX50   |
| REL | DDX52   |
| REL | DDX55   |
| REL | DENND1C |
| REL | DENND4A |
| REL | DENR    |
| REL | DHRS3   |
| REL | DHX15   |
| REL | DHX16   |
| REL | DHX34   |
| REL | DHX36   |
| REL | DHX37   |
| REL | DIAPH1  |
| REL | DLGAP4  |
| REL | DLST    |
| REL | DMAP1   |
| REL | DNAJA1  |
| REL | DNAJA2  |
| REL | DNAJB1  |
| REL | DNAJB2  |
| REL | DNAJB6  |
| REL | DNAJC25 |
| REL | DNAJC7  |
| REL | DNPEP   |
| REL | DOK1    |
| REL | DPH3    |
| REL | DPM1    |
| REL | DTD2    |
| REL | DTNBP1  |
| REL | DUSP10  |
| REL | DUSP4   |
| REL | DVL3    |
| REL | DYNC1I2 |
| REL | E2F4    |
| REL | E2F7    |
| REL | EBF1    |
| REL | EEA1    |
| REL | EEF1B2  |
| REL | EEF1E1  |
| REL | EFTUD2  |

|     |              |
|-----|--------------|
| REL | EGR2         |
| REL | EGR3         |
| REL | EHD1         |
| REL | EIF1         |
| REL | EIF2B2       |
| REL | EIF2B4       |
| REL | EIF2S3       |
| REL | EIF3A        |
| REL | EIF3D        |
| REL | EIF3F        |
| REL | EIF3G        |
| REL | EIF3H        |
| REL | EIF3K        |
| REL | EIF3M        |
| REL | EIF4A1       |
| REL | EIF4A2       |
| REL | EIF4G1       |
| REL | EIF4G2       |
| REL | EIF5         |
| REL | EIF5B        |
| REL | EIF6         |
| REL | ELP2         |
| REL | EMC7         |
| REL | EMG1         |
| REL | EML3         |
| REL | EML4         |
| REL | EN01         |
| REL | ENSA         |
| REL | EPB41L4A-AS1 |
| REL | EPC1         |
| REL | EPG5         |
| REL | EPM2A        |
| REL | EPN1         |
| REL | EPS15        |
| REL | ESC01        |
| REL | ESD          |
| REL | ETF1         |
| REL | ETS1         |
| REL | EXOC7        |
| REL | EXOSC3       |
| REL | EXOSC4       |
| REL | EXOSC5       |
| REL | EXOSC6       |
| REL | EXT2         |
| REL | EZR          |
| REL | FADD         |
| REL | FAM172A      |
| REL | FAM177A1     |
| REL | FAM204A      |
| REL | FAM207A      |

|     |            |
|-----|------------|
| REL | FAM213B    |
| REL | FAM234A    |
| REL | FAM32A     |
| REL | FAM3C      |
| REL | FAM69A     |
| REL | FAM96B     |
| REL | FASN       |
| REL | FBL        |
| REL | FBXL12     |
| REL | FBXL18     |
| REL | FBX011     |
| REL | FBX022     |
| REL | FBX028     |
| REL | FBX07      |
| REL | FBXW11     |
| REL | FCER2      |
| REL | FCRL1      |
| REL | FDFT1      |
| REL | FDPS       |
| REL | FDX1       |
| REL | FGF14-AS2  |
| REL | FIS1       |
| REL | FLAD1      |
| REL | FMNL1      |
| REL | FMNL2      |
| REL | FNBP4      |
| REL | FNIP1      |
| REL | FNTA       |
| REL | FOXN3-AS1  |
| REL | FOXP1      |
| REL | FUBP1      |
| REL | FUS        |
| REL | FYN        |
| REL | G3BP2      |
| REL | GABPB1-AS1 |
| REL | GADD45B    |
| REL | GAPVD1     |
| REL | GAR1       |
| REL | GARS       |
| REL | GAS7       |
| REL | GCC2       |
| REL | GDI2       |
| REL | GDPD5      |
| REL | GEMIN6     |
| REL | GFOD1      |
| REL | GGA1       |
| REL | GGNBP2     |
| REL | GLTP       |
| REL | GNAI3      |
| REL | GNL2       |

|     |           |
|-----|-----------|
| REL | GOLGA7    |
| REL | GORAB     |
| REL | GOSR1     |
| REL | GOSR2     |
| REL | GPBP1     |
| REL | GPR137    |
| REL | GPS2      |
| REL | GPSM3     |
| REL | GRAPL     |
| REL | GRIPAP1   |
| REL | GSPT1     |
| REL | GTF2A2    |
| REL | GTF2F1    |
| REL | GTF2H2    |
| REL | GTF2H3    |
| REL | GTPBP10   |
| REL | GTPBP3    |
| REL | GTPBP4    |
| REL | GTPBP8    |
| REL | H3F3A     |
| REL | HDAC5     |
| REL | HEATR1    |
| REL | HGS       |
| REL | HIF1A     |
| REL | HIPK1     |
| REL | HIPK3     |
| REL | HIVEP1    |
| REL | HMGCS1    |
| REL | HMGXB3    |
| REL | HNRNPA0   |
| REL | HNRNPA1L2 |
| REL | HNRNPAB   |
| REL | HNRNPC    |
| REL | HNRNPD    |
| REL | HNRNPF    |
| REL | HNRNPH1   |
| REL | HNRNPH3   |
| REL | HNRNPU    |
| REL | HOPX      |
| REL | HSPA4     |
| REL | HSPA8     |
| REL | HSPBAP1   |
| REL | HSPBP1    |
| REL | ICAM1     |
| REL | ID2       |
| REL | ID3       |
| REL | IDI1      |
| REL | IER5      |
| REL | IFNGR1    |
| REL | IGF2BP3   |

|     |          |
|-----|----------|
| REL | IGF2R    |
| REL | IGFBP4   |
| REL | IKZF3    |
| REL | IL21R    |
| REL | IL2RA    |
| REL | IL2RG    |
| REL | IL4I1    |
| REL | ILF2     |
| REL | ILF3     |
| REL | ILKAP    |
| REL | IMP3     |
| REL | INF2     |
| REL | ING3     |
| REL | INIP     |
| REL | IN080    |
| REL | IN080B   |
| REL | IN080C   |
| REL | INTS9    |
| REL | IPPK     |
| REL | IRAK1    |
| REL | IREB2    |
| REL | IRF5     |
| REL | ISG20L2  |
| REL | ISY1     |
| REL | ITGB2    |
| REL | ITPA     |
| REL | ITPRIPL2 |
| REL | JAGN1    |
| REL | JAK1     |
| REL | JMJD1C   |
| REL | JUNB     |
| REL | KANSL1   |
| REL | KAT6B    |
| REL | KAT8     |
| REL | KBTBD8   |
| REL | KCNQ5    |
| REL | KCTD10   |
| REL | KCTD12   |
| REL | KCTD5    |
| REL | KDM1B    |
| REL | KDM6B    |
| REL | KHNYN    |
| REL | KIAA0232 |
| REL | KIF20B   |
| REL | KLF10    |
| REL | KLHL18   |
| REL | KMT2E    |
| REL | KPNA4    |
| REL | KPNA6    |
| REL | KPNB1    |

|     |           |
|-----|-----------|
| REL | KRCC1     |
| REL | KRR1      |
| REL | KTI12     |
| REL | KYNU      |
| REL | LAMTOR3   |
| REL | LAPTM5    |
| REL | LARP7     |
| REL | LAS1L     |
| REL | LCOR      |
| REL | LCORL     |
| REL | LCP1      |
| REL | LDHA      |
| REL | LIMD2     |
| REL | LITAF     |
| REL | LLPH      |
| REL | LMNA      |
| REL | LRRC32    |
| REL | LRRC41    |
| REL | LRRC58    |
| REL | LRRC8D    |
| REL | LRRFIP1   |
| REL | LSG1      |
| REL | LSM5      |
| REL | LST1      |
| REL | LTA       |
| REL | LTA4H     |
| REL | LTV1      |
| REL | LUC7L2    |
| REL | LY9       |
| REL | LYPLA2    |
| REL | LYRM2     |
| REL | LYRM7     |
| REL | LYST      |
| REL | M6PR      |
| REL | MAG0H     |
| REL | MANBA     |
| REL | MAP3K1    |
| REL | MAP3K7    |
| REL | MAP3K8    |
| REL | MAP7D3    |
| REL | MAPK1IP1L |
| REL | MAPK6     |
| REL | MARCKS    |
| REL | MAST4     |
| REL | MAX       |
| REL | MBNL1     |
| REL | MBTPS2    |
| REL | MCRIP1    |
| REL | MDC1      |
| REL | MDN1      |

|     |           |
|-----|-----------|
| REL | MEA1      |
| REL | MED1      |
| REL | MED10     |
| REL | MED19     |
| REL | MED23     |
| REL | MED7      |
| REL | MEF2C     |
| REL | MEMO1     |
| REL | MEPCE     |
| REL | METRN     |
| REL | METTLL14  |
| REL | METTLL21A |
| REL | METTLL2A  |
| REL | METTLL2B  |
| REL | METTLL8   |
| REL | METTLL9   |
| REL | MFN1      |
| REL | MICU2     |
| REL | MIDN      |
| REL | MIEF1     |
| REL | MINOS1    |
| REL | MIR155HG  |
| REL | MIR3142HG |
| REL | MKKS      |
| REL | MLF2      |
| REL | MLLT6     |
| REL | MLST8     |
| REL | MME       |
| REL | MOB4      |
| REL | MOCS3     |
| REL | MORC2     |
| REL | MPDU1     |
| REL | MPLKIP    |
| REL | MRPL12    |
| REL | MRPL21    |
| REL | MRPL28    |
| REL | MRPL3     |
| REL | MRPL47    |
| REL | MRPL52    |
| REL | MRPS18B   |
| REL | MRPS22    |
| REL | MRPS23    |
| REL | MS4A1     |
| REL | MTCH2     |
| REL | MTERF2    |
| REL | MTMR14    |
| REL | MTMR9     |
| REL | MTRF1L    |
| REL | MYC       |
| REL | MYNN      |

|     |         |
|-----|---------|
| REL | NAA10   |
| REL | NAA15   |
| REL | NAA20   |
| REL | NAA35   |
| REL | NAB1    |
| REL | NABP1   |
| REL | NACA    |
| REL | NAP1L1  |
| REL | NARS    |
| REL | NAT9    |
| REL | NBEAL1  |
| REL | NCBP2   |
| REL | NCL     |
| REL | NCOA3   |
| REL | NCOA5   |
| REL | NDUFA12 |
| REL | NDUF4F4 |
| REL | NECAP1  |
| REL | NECAP2  |
| REL | NEDD4L  |
| REL | NEK8    |
| REL | NELFE   |
| REL | NEMF    |
| REL | NFAT5   |
| REL | NFATC1  |
| REL | NFATC3  |
| REL | NFE2L1  |
| REL | NFE2L2  |
| REL | NFKB1   |
| REL | NFKB2   |
| REL | NFKBIA  |
| REL | NFKBIB  |
| REL | NFKBID  |
| REL | NFKBIE  |
| REL | NFKBIZ  |
| REL | NFX1    |
| REL | NGDN    |
| REL | NGRN    |
| REL | NIFK    |
| REL | NIN     |
| REL | NIPBL   |
| REL | NKRF    |
| REL | NME1    |
| REL | NME2    |
| REL | NOC2L   |
| REL | NOC3L   |
| REL | NOL6    |
| REL | NOL8    |
| REL | NOL9    |
| REL | NOP10   |



|     |         |
|-----|---------|
| REL | NOP2    |
| REL | NOP58   |
| REL | NORAD   |
| REL | NPM3    |
| REL | NPW     |
| REL | NR1H2   |
| REL | NR2F6   |
| REL | NR3C1   |
| REL | NR4A1   |
| REL | NR4A2   |
| REL | NR4A3   |
| REL | NRIP1   |
| REL | NRR0S   |
| REL | NRSN2   |
| REL | NSA2    |
| REL | NTMT1   |
| REL | NUBP1   |
| REL | NUCB1   |
| REL | NUCKS1  |
| REL | NUDC    |
| REL | NUFIP1  |
| REL | NUP214  |
| REL | NUP35   |
| REL | NUP62   |
| REL | NUP93   |
| REL | NVL     |
| REL | OCIAD1  |
| REL | OFD1    |
| REL | OGFR    |
| REL | OLA1    |
| REL | ORAI1   |
| REL | ORA0V1  |
| REL | ORC2    |
| REL | OSBPL8  |
| REL | OTUD4   |
| REL | OXSRI   |
| REL | P3H1    |
| REL | PA2G4   |
| REL | PAICS   |
| REL | PAK1IP1 |
| REL | PAK2    |
| REL | PARL    |
| REL | PAWR    |
| REL | PCBP1   |
| REL | PCF11   |
| REL | PCGF5   |
| REL | PCM1    |
| REL | PCNP    |
| REL | PCNX4   |
| REL | PCYT1A  |

|     |         |
|-----|---------|
| REL | PDCD11  |
| REL | PDCD6   |
| REL | PDCD7   |
| REL | PDE4A   |
| REL | PDE4B   |
| REL | PDLIM5  |
| REL | PDS5B   |
| REL | PDSS1   |
| REL | PEA15   |
| REL | PEF1    |
| REL | PEX5    |
| REL | PFAS    |
| REL | PFDN6   |
| REL | PFKP    |
| REL | PGAM5   |
| REL | PHACTR1 |
| REL | PHB2    |
| REL | PHF11   |
| REL | PHF23   |
| REL | PHF5A   |
| REL | PHTF1   |
| REL | PICALM  |
| REL | PICK1   |
| REL | PIGL    |
| REL | PIK3AP1 |
| REL | PIK3CA  |
| REL | PIKFYVE |
| REL | PIM3    |
| REL | PITPNM1 |
| REL | PLEKHA1 |
| REL | PLGRKT  |
| REL | PLRG1   |
| REL | PMPCA   |
| REL | PNISR   |
| REL | PNPT1   |
| REL | PNRC1   |
| REL | POGLUT1 |
| REL | POGZ    |
| REL | POLDIP2 |
| REL | POLE3   |
| REL | POLG2   |
| REL | POLR2A  |
| REL | POLR2B  |
| REL | POLR2D  |
| REL | POLR2H  |
| REL | POLR2K  |
| REL | POLR3D  |
| REL | POLR3E  |
| REL | POMGNT1 |
| REL | POMP    |

|     |          |
|-----|----------|
| REL | POP4     |
| REL | POT1     |
| REL | PPAN     |
| REL | PPIA     |
| REL | PPIG     |
| REL | PPIP5K2  |
| REL | PPP1R10  |
| REL | PPP1R12A |
| REL | PPP1R18  |
| REL | PPP2CA   |
| REL | PPP2R1A  |
| REL | PPP2R1B  |
| REL | PPP2R2A  |
| REL | PPP2R5A  |
| REL | PPP2R5E  |
| REL | PPP4C    |
| REL | PPP4R3A  |
| REL | PPP6R1   |
| REL | PRDM2    |
| REL | PRKAG1   |
| REL | PRKAR1A  |
| REL | PRKCB    |
| REL | PRNP     |
| REL | PROSER3  |
| REL | PRPF19   |
| REL | PRPF38B  |
| REL | PRPF4    |
| REL | PRPF40A  |
| REL | PRR13    |
| REL | PRR3     |
| REL | PRRC2C   |
| REL | PSEN1    |
| REL | PSMA1    |
| REL | PSMA6    |
| REL | PSMB5    |
| REL | PSMB7    |
| REL | PSMC4    |
| REL | PSMC5    |
| REL | PSMD13   |
| REL | PSMD14   |
| REL | PSMD8    |
| REL | PTBP1    |
| REL | PTBP3    |
| REL | PTDSS2   |
| REL | PTGER4   |
| REL | PTGES3   |
| REL | PTGIR    |
| REL | PTP4A3   |
| REL | PTRH1    |
| REL | PTRH2    |

|     |          |
|-----|----------|
| REL | PUF60    |
| REL | PUM1     |
| REL | PUM3     |
| REL | PUS1     |
| REL | PWP1     |
| REL | QTRT2    |
| REL | RAB11A   |
| REL | RAB20    |
| REL | RAB21    |
| REL | RAB27A   |
| REL | RAB29    |
| REL | RAB31    |
| REL | RAB34    |
| REL | RAB3GAP2 |
| REL | RAB6A    |
| REL | RAB7A    |
| REL | RAB8B    |
| REL | RACK1    |
| REL | RALB     |
| REL | RALGAPB  |
| REL | RANBP1   |
| REL | RANGAP1  |
| REL | RAP1B    |
| REL | RARA     |
| REL | RARS     |
| REL | RBBP6    |
| REL | RBM14    |
| REL | RBM25    |
| REL | RBM34    |
| REL | RBM39    |
| REL | RBM42    |
| REL | RBM7     |
| REL | RCHY1    |
| REL | RCSD1    |
| REL | RDX      |
| REL | RECQL5   |
| REL | REL      |
| REL | RELB     |
| REL | RELT     |
| REL | REST     |
| REL | REV1     |
| REL | RFK      |
| REL | RHEB     |
| REL | RHOBTB3  |
| REL | RHOC     |
| REL | RHOF     |
| REL | RHOG     |
| REL | RHOT2    |
| REL | RILPL2   |
| REL | RIOK1    |

|     |         |
|-----|---------|
| REL | RIOK3   |
| REL | RNF138  |
| REL | RNF139  |
| REL | RNF19A  |
| REL | RNF2    |
| REL | RNF20   |
| REL | RNF219  |
| REL | RNF220  |
| REL | RNF41   |
| REL | RNMT    |
| REL | RPA2    |
| REL | RPF1    |
| REL | RPF2    |
| REL | RPL10   |
| REL | RPL10A  |
| REL | RPL11   |
| REL | RPL13A  |
| REL | RPL15   |
| REL | RPL18A  |
| REL | RPL19   |
| REL | RPL21   |
| REL | RPL23   |
| REL | RPL26   |
| REL | RPL27   |
| REL | RPL27A  |
| REL | RPL28   |
| REL | RPL29   |
| REL | RPL3    |
| REL | RPL30   |
| REL | RPL31   |
| REL | RPL32   |
| REL | RPL34   |
| REL | RPL36AL |
| REL | RPL37   |
| REL | RPL37A  |
| REL | RPL38   |
| REL | RPL4    |
| REL | RPL41   |
| REL | RPL6    |
| REL | RPL7    |
| REL | RPL7L1  |
| REL | RPLP0   |
| REL | RPLP1   |
| REL | RPLP2   |
| REL | RPS11   |
| REL | RPS12   |
| REL | RPS13   |
| REL | RPS14   |
| REL | RPS15   |
| REL | RPS16   |

|     |          |
|-----|----------|
| REL | RPS17    |
| REL | RPS19    |
| REL | RPS19BP1 |
| REL | RPS20    |
| REL | RPS21    |
| REL | RPS26    |
| REL | RPS27    |
| REL | RPS29    |
| REL | RPS3     |
| REL | RPS3A    |
| REL | RPS6     |
| REL | RPS7     |
| REL | RPSA     |
| REL | RRP12    |
| REL | RRP15    |
| REL | RRP9     |
| REL | RSBN1    |
| REL | RSF1     |
| REL | RUFY3    |
| REL | RUNX3    |
| REL | RUVBL1   |
| REL | RUVBL2   |
| REL | SAMSN1   |
| REL | SARS     |
| REL | SART1    |
| REL | SATB1    |
| REL | SAYSD1   |
| REL | SBDS     |
| REL | SCAF8    |
| REL | SCAMP3   |
| REL | SCD      |
| REL | SC01     |
| REL | SCYL3    |
| REL | SDAD1    |
| REL | SDCBP    |
| REL | SDE2     |
| REL | SDF4     |
| REL | SDHC     |
| REL | SECISBP2 |
| REL | SEMA7A   |
| REL | SENP1    |
| REL | SEPT9    |
| REL | SERPINB9 |
| REL | SETD4    |
| REL | SETD5    |
| REL | SF1      |
| REL | SF3B1    |
| REL | SF3B2    |
| REL | SF3B3    |
| REL | SF3B5    |

|     |          |
|-----|----------|
| REL | SFSWAP   |
| REL | SFT2D1   |
| REL | SGTA     |
| REL | SH2B3    |
| REL | SH3BP2   |
| REL | SH3TC1   |
| REL | SHMT2    |
| REL | SIN3A    |
| REL | SIPA1L1  |
| REL | SIRPA    |
| REL | SIRT6    |
| REL | SIRT7    |
| REL | SKIL     |
| REL | SKP2     |
| REL | SLAMF1   |
| REL | SLC12A6  |
| REL | SLC1A5   |
| REL | SLC25A13 |
| REL | SLC25A25 |
| REL | SLC25A3  |
| REL | SLC29A2  |
| REL | SLC35A2  |
| REL | SLC35B3  |
| REL | SLC38A1  |
| REL | SLC39A1  |
| REL | SLC39A14 |
| REL | SLC39A6  |
| REL | SLC3A2   |
| REL | SLC43A3  |
| REL | SLC4A7   |
| REL | SLC6A9   |
| REL | SLC7A1   |
| REL | SLMAP    |
| REL | SLTM     |
| REL | SLU7     |
| REL | SMAP2    |
| REL | SMARCA4  |
| REL | SMARCE1  |
| REL | SMC5     |
| REL | SMCHD1   |
| REL | SMIM12   |
| REL | SMIM19   |
| REL | SMNDC1   |
| REL | SMU1     |
| REL | SNF8     |
| REL | SNHG8    |
| REL | SNRNP200 |
| REL | SNRPB    |
| REL | SNRPB2   |
| REL | SNRPD1   |

|     |         |
|-----|---------|
| REL | SNRPD2  |
| REL | SNRPE   |
| REL | SNRPF   |
| REL | SNRPG   |
| REL | SNU13   |
| REL | SNW1    |
| REL | SNX11   |
| REL | SNX13   |
| REL | SNX9    |
| REL | SPAG9   |
| REL | SPATA2L |
| REL | SPIB    |
| REL | SPRTN   |
| REL | SPRY1   |
| REL | SREK1   |
| REL | SRF     |
| REL | SRFBP1  |
| REL | SRP19   |
| REL | SRP72   |
| REL | SRRM1   |
| REL | SRRM2   |
| REL | SRSF1   |
| REL | SRSF5   |
| REL | SRSF7   |
| REL | SRSF9   |
| REL | SS18    |
| REL | SSBP1   |
| REL | SSSCA1  |
| REL | ST14    |
| REL | ST20    |
| REL | ST3GAL4 |
| REL | ST8SIA4 |
| REL | STAG1   |
| REL | STAG2   |
| REL | STAT5A  |
| REL | STAT6   |
| REL | STAU1   |
| REL | STK4    |
| REL | STOML2  |
| REL | STRAP   |
| REL | STT3A   |
| REL | STUM    |
| REL | STX3    |
| REL | STX4    |
| REL | SUGT1   |
| REL | SULF2   |
| REL | SUPT3H  |
| REL | SYF2    |
| REL | SYMPK   |
| REL | SYNCRIP |



|     |             |
|-----|-------------|
| REL | SYNP0       |
| REL | TAC01       |
| REL | TAF1        |
| REL | TAF7        |
| REL | TANK        |
| REL | TATDN1      |
| REL | TAX1BP1     |
| REL | TBC1D24     |
| REL | TBL1X       |
| REL | TBL3        |
| REL | TBPL1       |
| REL | TBRG1       |
| REL | TBRG4       |
| REL | TCF25       |
| REL | TCF3        |
| REL | TCF7        |
| REL | TCOF1       |
| REL | TCP1        |
| REL | TDG         |
| REL | TDRD3       |
| REL | TES         |
| REL | TESPA1      |
| REL | TFB2M       |
| REL | TFE3        |
| REL | TFPI2       |
| REL | TGFB1       |
| REL | TGFBR2      |
| REL | TGIF1       |
| REL | TGIF2       |
| REL | TGOLN2      |
| REL | THAP1       |
| REL | THAP7       |
| REL | THRAP3      |
| REL | THUMPD3     |
| REL | THUMPD3-AS1 |
| REL | TIGAR       |
| REL | TIMM10B     |
| REL | TIMM17A     |
| REL | TIMM23      |
| REL | TIMM23B     |
| REL | TIMM8A      |
| REL | TINF2       |
| REL | TIPRL       |
| REL | TLK1        |
| REL | TM2D3       |
| REL | TMEM102     |
| REL | TMEM109     |
| REL | TMEM123     |
| REL | TMEM127     |
| REL | TMEM128     |

|     |          |
|-----|----------|
| REL | TMEM138  |
| REL | TMEM150A |
| REL | TMEM184C |
| REL | TMEM199  |
| REL | TMEM208  |
| REL | TMEM216  |
| REL | TMEM251  |
| REL | TMEM33   |
| REL | TMEM65   |
| REL | TMEM69   |
| REL | TMEM97   |
| REL | TMEM9B   |
| REL | TMX1     |
| REL | TMX2     |
| REL | TNF      |
| REL | TNFAIP3  |
| REL | TNFAIP8  |
| REL | TNFRSF14 |
| REL | TNIP1    |
| REL | TNIP2    |
| REL | TNKS2    |
| REL | TNP02    |
| REL | TNP03    |
| REL | TNRC6A   |
| REL | TOE1     |
| REL | TOMM20   |
| REL | TOMM22   |
| REL | TOP1     |
| REL | TOX4     |
| REL | TP53BP1  |
| REL | TPM3     |
| REL | TPRKB    |
| REL | TPT1     |
| REL | TRA2B    |
| REL | TRAF1    |
| REL | TRAF4    |
| REL | TRAF7    |
| REL | TRAIP    |
| REL | TRAPPC10 |
| REL | TRIB3    |
| REL | TRIM35   |
| REL | TRIM44   |
| REL | TRM0     |
| REL | TRMT1    |
| REL | TRMT10A  |
| REL | TRMT12   |
| REL | TRMT6    |
| REL | TRUB2    |
| REL | TSC22D2  |
| REL | TSG101   |

|     |         |
|-----|---------|
| REL | TSHZ2   |
| REL | TSPAN31 |
| REL | TSSC4   |
| REL | TTBK2   |
| REL | TTC1    |
| REL | TTC33   |
| REL | TTF1    |
| REL | TTF2    |
| REL | TTI2    |
| REL | TTPAL   |
| REL | TTY15   |
| REL | TUFM    |
| REL | TUSC2   |
| REL | TVP23C  |
| REL | TWISTNB |
| REL | TXNDC16 |
| REL | TXNL1   |
| REL | TXNL4B  |
| REL | U2AF1L4 |
| REL | U2AF2   |
| REL | U2SURP  |
| REL | UBA2    |
| REL | UBA52   |
| REL | UBAC2   |
| REL | UBALD2  |
| REL | UBE2D1  |
| REL | UBE2D3  |
| REL | UBE2E1  |
| REL | UBE2J2  |
| REL | UBE2Z   |
| REL | UBE3A   |
| REL | UBE3C   |
| REL | UBL3    |
| REL | UBLCP1  |
| REL | UBR5    |
| REL | UBXN1   |
| REL | UFM1    |
| REL | UGGT2   |
| REL | UGT8    |
| REL | UNC50   |
| REL | UPP1    |
| REL | UQCRC2  |
| REL | URB1    |
| REL | URM1    |
| REL | USE1    |
| REL | USP12   |
| REL | USP36   |
| REL | USP4    |
| REL | USP8    |
| REL | USP9X   |

|     |            |
|-----|------------|
| REL | USPL1      |
| REL | UTP14A     |
| REL | UTP18      |
| REL | UTP20      |
| REL | UTP23      |
| REL | UTP3       |
| REL | UTP6       |
| REL | UVRAG      |
| REL | VASP       |
| REL | VIM        |
| REL | VPS26A     |
| REL | VPS51      |
| REL | VTA1       |
| REL | VWA8       |
| REL | WAC        |
| REL | WAPL       |
| REL | WARS       |
| REL | WDR11      |
| REL | WDR12      |
| REL | WDR36      |
| REL | WDR43      |
| REL | WDR46      |
| REL | WDR5B      |
| REL | WDR73      |
| REL | WDR74      |
| REL | WDR75      |
| REL | WDR83      |
| REL | WIPF2      |
| REL | WRAP73     |
| REL | WSB1       |
| REL | WSB2       |
| REL | WTAP       |
| REL | WWP2       |
| REL | XAB2       |
| REL | XIAP       |
| REL | XP05       |
| REL | XP06       |
| REL | XRN2       |
| REL | YARS2      |
| REL | YRDC       |
| REL | YTHDF2     |
| REL | YWHAE      |
| REL | YWHAG      |
| REL | YWHAQ      |
| REL | YWHAZ      |
| REL | ZBED2      |
| REL | ZBTB10     |
| REL | ZBTB11-AS1 |
| REL | ZBTB21     |
| REL | ZBTB25     |

|      |              |
|------|--------------|
| REL  | ZBTB7A       |
| REL  | ZC3H12A      |
| REL  | ZCCHC9       |
| REL  | ZFAND6       |
| REL  | ZFAS1        |
| REL  | ZFC3H1       |
| REL  | ZFP36L1      |
| REL  | ZFY          |
| REL  | ZHX1         |
| REL  | ZHX1-C8orf76 |
| REL  | ZKSCAN4      |
| REL  | ZMAT2        |
| REL  | ZMAT3        |
| REL  | ZMPSTE24     |
| REL  | ZNF131       |
| REL  | ZNF184       |
| REL  | ZNF207       |
| REL  | ZNF232       |
| REL  | ZNF235       |
| REL  | ZNF276       |
| REL  | ZNF324       |
| REL  | ZNF33A       |
| REL  | ZNF385C      |
| REL  | ZNF426       |
| REL  | ZNF485       |
| REL  | ZNF511       |
| REL  | ZNF562       |
| REL  | ZNF583       |
| REL  | ZNF622       |
| REL  | ZNF655       |
| REL  | ZNF668       |
| REL  | ZNF7         |
| REL  | ZNF747       |
| REL  | ZNF75A       |
| REL  | ZNF800       |
| REL  | ZNFX1        |
| REL  | ZNHIT2       |
| REL  | ZPR1         |
| REL  | ZRANB2       |
| RELA | ABR          |
| RELA | ADGRE5       |
| RELA | AG03         |
| RELA | AGPAT3       |
| RELA | AKAP8        |
| RELA | AKAP9        |
| RELA | ANAPC16      |
| RELA | ANKRD12      |
| RELA | ANTXR2       |
| RELA | ARF1         |
| RELA | ARHGAP11A    |

|      |          |
|------|----------|
| RELA | ARID4B   |
| RELA | ARMCX6   |
| RELA | ATP6V1H  |
| RELA | B3GALNT1 |
| RELA | B4GALT3  |
| RELA | BCAP31   |
| RELA | BLOC1S6  |
| RELA | BORCS6   |
| RELA | BRAF     |
| RELA | C11orf71 |
| RELA | CADM1    |
| RELA | CADPS    |
| RELA | CARNMT1  |
| RELA | CASP8    |
| RELA | CCDC102A |
| RELA | CCSER2   |
| RELA | CDK13    |
| RELA | CDK5RAP3 |
| RELA | CFAP36   |
| RELA | CGRRF1   |
| RELA | CHMP4B   |
| RELA | CHUK     |
| RELA | CINP     |
| RELA | CKAP4    |
| RELA | CNOT3    |
| RELA | COL4A3BP |
| RELA | COLGALT1 |
| RELA | COMMD2   |
| RELA | CR1      |
| RELA | CRTAP    |
| RELA | CSNK1D   |
| RELA | CSRNP1   |
| RELA | CTDSP2   |
| RELA | CTU1     |
| RELA | CYP2R1   |
| RELA | CYTH1    |
| RELA | DENR     |
| RELA | DHDDS    |
| RELA | DIS3     |
| RELA | DNAAF5   |
| RELA | DTX3L    |
| RELA | EEF1A1   |
| RELA | EEF1B2   |
| RELA | EIF2B1   |
| RELA | ELL2     |
| RELA | EMD      |
| RELA | EMP3     |
| RELA | ENOX2    |
| RELA | FAM122B  |
| RELA | FAM126A  |

|      |             |
|------|-------------|
| RELA | FAM13B      |
| RELA | FAM204A     |
| RELA | FAM222B     |
| RELA | FBX016      |
| RELA | FIS1        |
| RELA | FMNL1       |
| RELA | FUZ         |
| RELA | GMDS        |
| RELA | GOPC        |
| RELA | GPATCH2L    |
| RELA | GPR137      |
| RELA | GPX4        |
| RELA | GSKIP       |
| RELA | GSPT2       |
| RELA | HEBP1       |
| RELA | HEG1        |
| RELA | HMGXB3      |
| RELA | HOXB7       |
| RELA | IBTK        |
| RELA | IL15RA      |
| RELA | ING4        |
| RELA | IST1        |
| RELA | JRK         |
| RELA | KAT5        |
| RELA | KAT8        |
| RELA | KIAA2013    |
| RELA | KLF12       |
| RELA | KMT2E       |
| RELA | LM02        |
| RELA | LPCAT4      |
| RELA | LPGAT1      |
| RELA | MAN1A1      |
| RELA | MAP1S       |
| RELA | MAP4        |
| RELA | MAP9        |
| RELA | MCOLN1      |
| RELA | MCRIP1      |
| RELA | MED11       |
| RELA | MED7        |
| RELA | MIER1       |
| RELA | MKL1        |
| RELA | MLLT10      |
| RELA | MLST8       |
| RELA | MORF4L2-AS1 |
| RELA | MRPL43      |
| RELA | MVB12A      |
| RELA | NCAPH2      |
| RELA | NDUFAF7     |
| RELA | NFATC3      |
| RELA | NPLOC4      |

|      |         |
|------|---------|
| RELA | NRM     |
| RELA | NSMCE1  |
| RELA | NUDC    |
| RELA | PASK    |
| RELA | PDE6B   |
| RELA | PEX5    |
| RELA | PIGB    |
| RELA | PLEKHA3 |
| RELA | PLEKHM1 |
| RELA | PNISR   |
| RELA | POLA1   |
| RELA | POLR2B  |
| RELA | PPM1D   |
| RELA | PPP1R18 |
| RELA | PQLC3   |
| RELA | PRKACB  |
| RELA | PRMT5   |
| RELA | PRPF38B |
| RELA | PTPN4   |
| RELA | RAB40B  |
| RELA | RAB5A   |
| RELA | RBBP6   |
| RELA | RBCK1   |
| RELA | RBMS1   |
| RELA | RELA    |
| RELA | RHOG    |
| RELA | RIC1    |
| RELA | RIC8A   |
| RELA | RNF121  |
| RELA | RPL18A  |
| RELA | RPL21   |
| RELA | RPL32   |
| RELA | RPL37   |
| RELA | RPS27   |
| RELA | RPS27A  |
| RELA | RPS29   |
| RELA | RPS6    |
| RELA | RTCB    |
| RELA | RUFY3   |
| RELA | SACM1L  |
| RELA | SCAMP3  |
| RELA | SDE2    |
| RELA | SEC14L1 |
| RELA | SEC23IP |
| RELA | SEC24D  |
| RELA | SEC61A1 |
| RELA | SERINC1 |
| RELA | SERTAD3 |
| RELA | SETBP1  |
| RELA | SH3BP2  |



|      |          |
|------|----------|
| RELA | SHF      |
| RELA | SLC30A7  |
| RELA | SLC35B3  |
| RELA | SLC39A10 |
| RELA | SLC39A7  |
| RELA | SMCHD1   |
| RELA | SMC04    |
| RELA | SMG6     |
| RELA | SPG11    |
| RELA | STAT3    |
| RELA | STAT6    |
| RELA | SYNJ2    |
| RELA | TAGLN2   |
| RELA | TBC1D4   |
| RELA | TBC1D7   |
| RELA | TMBIM1   |
| RELA | TMEM101  |
| RELA | TMEM156  |
| RELA | TMEM230  |
| RELA | TMEM68   |
| RELA | TRAF5    |
| RELA | TRAIP    |
| RELA | TRIM28   |
| RELA | TRMT10B  |
| RELA | TRMT61B  |
| RELA | U2AF1    |
| RELA | UBC      |
| RELA | USP36    |
| RELA | VAC14    |
| RELA | VAMP2    |
| RELA | WASF2    |
| RELA | WDR62    |
| RELA | YTHDC1   |
| RELA | ZADH2    |
| RELA | ZBTB11   |
| RELA | ZFAS1    |
| RELA | ZMYM2    |
| RELA | ZNF124   |
| RELA | ZNF234   |
| RELA | ZNF248   |
| RELA | ZNF408   |
| RELA | ZNF780B  |
| RELA | ZNF787   |
| RELB | AATF     |
| RELB | ABCF1    |
| RELB | ABI1     |
| RELB | ACBD5    |
| RELB | ACSL5    |
| RELB | ADO      |
| RELB | ADPRHL2  |

|      |           |
|------|-----------|
| RELB | ADRM1     |
| RELB | ADSL      |
| RELB | AGL       |
| RELB | AG01      |
| RELB | AG03      |
| RELB | AHCY      |
| RELB | AHDC1     |
| RELB | AHSA1     |
| RELB | AKIRIN2   |
| RELB | AKT2      |
| RELB | AMD1      |
| RELB | ANAPC1    |
| RELB | ANKHD1    |
| RELB | ANP32E    |
| RELB | AP1B1     |
| RELB | AP1M1     |
| RELB | APBB1IP   |
| RELB | APMAP     |
| RELB | APOLD1    |
| RELB | APTR      |
| RELB | AQR       |
| RELB | ARHGAP11A |
| RELB | ARHGAP12  |
| RELB | ARHGDI A  |
| RELB | ARID1A    |
| RELB | ARPC3     |
| RELB | ARPC4     |
| RELB | ARSB      |
| RELB | ARV1      |
| RELB | ASB6      |
| RELB | ASXL2     |
| RELB | ATF2      |
| RELB | ATF7IP    |
| RELB | ATG101    |
| RELB | ATG12     |
| RELB | ATG5      |
| RELB | ATP6V1C2  |
| RELB | ATXN10    |
| RELB | BACE2     |
| RELB | BASP1     |
| RELB | BATF      |
| RELB | BBS10     |
| RELB | BCL2L1    |
| RELB | BCL3      |
| RELB | BECN1     |
| RELB | BIRC3     |
| RELB | BTF3      |
| RELB | BZW1      |
| RELB | C16orf91  |
| RELB | C17orf49  |

|      |          |
|------|----------|
| RELB | C3orf67  |
| RELB | C9orf40  |
| RELB | CALM2    |
| RELB | CAMK2B   |
| RELB | CARF     |
| RELB | CASZ1    |
| RELB | CBX4     |
| RELB | CCDC137  |
| RELB | CCDC174  |
| RELB | CCDC28B  |
| RELB | CCDC71   |
| RELB | CCDC9    |
| RELB | CCNB2    |
| RELB | CCNI     |
| RELB | CCNK     |
| RELB | CCR7     |
| RELB | CCT2     |
| RELB | CCT7     |
| RELB | CCZ1     |
| RELB | CD40     |
| RELB | CD70     |
| RELB | CD80     |
| RELB | CD83     |
| RELB | CDC37    |
| RELB | CDK5RAP1 |
| RELB | CDK7     |
| RELB | CENPA    |
| RELB | CENPL    |
| RELB | CEP55    |
| RELB | CETN3    |
| RELB | CFAP20   |
| RELB | CFLAR    |
| RELB | CGGBP1   |
| RELB | CHCHD5   |
| RELB | CHMP2B   |
| RELB | CHMP7    |
| RELB | CKS2     |
| RELB | CLTA     |
| RELB | CNDP2    |
| RELB | CNIH1    |
| RELB | CNOT7    |
| RELB | COG2     |
| RELB | COIL     |
| RELB | COMMD2   |
| RELB | COMMD6   |
| RELB | COPS7A   |
| RELB | COX17    |
| RELB | CREB1    |
| RELB | CREM     |
| RELB | CRK      |

|      |         |
|------|---------|
| RELB | CRLS1   |
| RELB | CS      |
| RELB | CSNK2A1 |
| RELB | CSTF2T  |
| RELB | CTDSP1  |
| RELB | CTNBL1  |
| RELB | CWC22   |
| RELB | CXCR4   |
| RELB | CYLD    |
| RELB | DAAM1   |
| RELB | DBI     |
| RELB | DCAF12  |
| RELB | DCAF7   |
| RELB | DCTN5   |
| RELB | DDX18   |
| RELB | DDX27   |
| RELB | DENND2D |
| RELB | DHRS3   |
| RELB | DHX15   |
| RELB | DHX36   |
| RELB | DHX38   |
| RELB | DMAP1   |
| RELB | DNAJA1  |
| RELB | DNAJB2  |
| RELB | DNAJB6  |
| RELB | DNAJC7  |
| RELB | DR1     |
| RELB | DTD2    |
| RELB | DTNBP1  |
| RELB | DYNC1I2 |
| RELB | E2F4    |
| RELB | EAPP    |
| RELB | EBF1    |
| RELB | EIF1AD  |
| RELB | EIF2B2  |
| RELB | EIF3D   |
| RELB | EIF3G   |
| RELB | EIF4A1  |
| RELB | EIF5    |
| RELB | EIF6    |
| RELB | ELAVL1  |
| RELB | ELOVL1  |
| RELB | ELP2    |
| RELB | EMC4    |
| RELB | EMG1    |
| RELB | EPS15   |
| RELB | ERCC3   |
| RELB | ETF1    |
| RELB | EXOC2   |
| RELB | EXOC7   |

|      |           |
|------|-----------|
| RELB | EXOSC3    |
| RELB | EXOSC5    |
| RELB | EXOSC6    |
| RELB | FAM104B   |
| RELB | FAM110A   |
| RELB | FANCL     |
| RELB | FBR5      |
| RELB | FBX022    |
| RELB | FBX028    |
| RELB | FBX034    |
| RELB | FBX043    |
| RELB | FBX048    |
| RELB | FBXW2     |
| RELB | FCH01     |
| RELB | FNIP1     |
| RELB | FNTA      |
| RELB | FOXP1     |
| RELB | FUBP1     |
| RELB | FUBP3     |
| RELB | FUS       |
| RELB | G2E3      |
| RELB | GADD45B   |
| RELB | GALNT6    |
| RELB | GAR1      |
| RELB | GARS      |
| RELB | GAS2L3    |
| RELB | GEMIN7    |
| RELB | GGA1      |
| RELB | GGNBP2    |
| RELB | GLRX5     |
| RELB | GNA13     |
| RELB | GNAI3     |
| RELB | GOSR1     |
| RELB | GPR137    |
| RELB | GRAMD1B   |
| RELB | GRIPAP1   |
| RELB | GSPT1     |
| RELB | GTF2A2    |
| RELB | GTF2F1    |
| RELB | GTPBP4    |
| RELB | HCCS      |
| RELB | HERPUD2   |
| RELB | HIST1H1D  |
| RELB | HIVEP1    |
| RELB | HIVEP3    |
| RELB | HJURP     |
| RELB | HMGB2     |
| RELB | HMHB1     |
| RELB | HNRNPA0   |
| RELB | HNRNPA1L2 |

|      |           |
|------|-----------|
| RELB | HNRNPC    |
| RELB | HNRNPD    |
| RELB | HNRNPH3   |
| RELB | HOMEZ     |
| RELB | HSBP1     |
| RELB | HSPA4     |
| RELB | HSPA8     |
| RELB | HSPBP1    |
| RELB | ICAM1     |
| RELB | ILF2      |
| RELB | ILF3      |
| RELB | ILKAP     |
| RELB | IN080     |
| RELB | IN080B    |
| RELB | IN080C    |
| RELB | INTS4     |
| RELB | ITGAE     |
| RELB | JADE1     |
| RELB | JAGN1     |
| RELB | KBTBD4    |
| RELB | KBTBD8    |
| RELB | KCP       |
| RELB | KDM2A     |
| RELB | KDM3B     |
| RELB | KIAA0586  |
| RELB | KIF22     |
| RELB | KIF23     |
| RELB | KIF2C     |
| RELB | KIFC1     |
| RELB | LAMTOR3   |
| RELB | LAPTM5    |
| RELB | LARP7     |
| RELB | LAS1L     |
| RELB | LCOR      |
| RELB | LINC00487 |
| RELB | LINC00623 |
| RELB | LLPH      |
| RELB | LM07      |
| RELB | LONP1     |
| RELB | LRRC32    |
| RELB | LRRC59    |
| RELB | LSM8      |
| RELB | LTB4R     |
| RELB | LYRM1     |
| RELB | LYRM2     |
| RELB | LYRM7     |
| RELB | MAGED2    |
| RELB | MAP3K1    |
| RELB | MAP3K7    |
| RELB | MAP3K8    |

|      |           |
|------|-----------|
| RELB | MAP4K4    |
| RELB | MAPK1IP1L |
| RELB | MARK3     |
| RELB | MDC1      |
| RELB | MED10     |
| RELB | MED13L    |
| RELB | MED17     |
| RELB | MELK      |
| RELB | METTTL21A |
| RELB | METTTL2A  |
| RELB | METTTL3   |
| RELB | METTTL9   |
| RELB | MIB1      |
| RELB | MICU2     |
| RELB | MLF2      |
| RELB | MOB4      |
| RELB | MRPL16    |
| RELB | MRPL21    |
| RELB | MRPL27    |
| RELB | MRPL47    |
| RELB | MRPL51    |
| RELB | MRPS18A   |
| RELB | MRPS22    |
| RELB | MS4A1     |
| RELB | MS4A7     |
| RELB | MSRA      |
| RELB | MTFR1L    |
| RELB | MTM1      |
| RELB | MYO1C     |
| RELB | NAA20     |
| RELB | NAB1      |
| RELB | NACA      |
| RELB | NCBP2     |
| RELB | NCL       |
| RELB | NDUFAF3   |
| RELB | NECAP2    |
| RELB | NEK6      |
| RELB | NELFE     |
| RELB | NFAT5     |
| RELB | NFATC1    |
| RELB | NFKB1     |
| RELB | NFKB2     |
| RELB | NFKBIA    |
| RELB | NFKBIB    |
| RELB | NFKBID    |
| RELB | NIFK      |
| RELB | NIPBL     |
| RELB | NKIRAS2   |
| RELB | NMU       |
| RELB | NOC2L     |

|      |            |
|------|------------|
| RELB | NOL8       |
| RELB | NOP58      |
| RELB | NORAD      |
| RELB | NR3C1      |
| RELB | NR6A1      |
| RELB | NRBF2      |
| RELB | NSUN6      |
| RELB | NUBP1      |
| RELB | NUCKS1     |
| RELB | NUFIP1     |
| RELB | NUP35      |
| RELB | NUTF2      |
| RELB | OARD1      |
| RELB | OPTN       |
| RELB | OXSRI      |
| RELB | PAK1IP1    |
| RELB | PAK4       |
| RELB | PCBP1      |
| RELB | PCGF3      |
| RELB | PCM1       |
| RELB | PCNP       |
| RELB | PDAP1      |
| RELB | PDCD7      |
| RELB | PDE12      |
| RELB | PDZD11     |
| RELB | PEX5       |
| RELB | PFKP       |
| RELB | PHACTR1    |
| RELB | PHF12      |
| RELB | PHIP       |
| RELB | PIK3CA     |
| RELB | PIM1       |
| RELB | PITPNA-AS1 |
| RELB | PLRG1      |
| RELB | PMPCA      |
| RELB | PNISR      |
| RELB | PNKP       |
| RELB | POLDIP2    |
| RELB | POLE3      |
| RELB | POLR2E     |
| RELB | POLR2L     |
| RELB | POMP       |
| RELB | PPAN       |
| RELB | PPIA       |
| RELB | PPID       |
| RELB | PPIG       |
| RELB | PPM1G      |
| RELB | PPP1R12C   |
| RELB | PPP2CA     |
| RELB | PPP2R1A    |



|      |          |
|------|----------|
| RELB | PPP2R2A  |
| RELB | PPP2R5E  |
| RELB | PPP4C    |
| RELB | PPTC7    |
| RELB | PRDM2    |
| RELB | PRELID2  |
| RELB | PRKAB1   |
| RELB | PRKCD    |
| RELB | PRPF19   |
| RELB | PRPF38B  |
| RELB | PRPF4    |
| RELB | PRRC2C   |
| RELB | PSEN1    |
| RELB | PSMB3    |
| RELB | PSMD13   |
| RELB | PSMD6    |
| RELB | PTBP1    |
| RELB | PTBP3    |
| RELB | PTGES3   |
| RELB | PTPRJ    |
| RELB | PTRH1    |
| RELB | PTTG1    |
| RELB | PUF60    |
| RELB | PYROXD1  |
| RELB | RAB11A   |
| RELB | RAB35    |
| RELB | RAB3GAP2 |
| RELB | RAB5C    |
| RELB | RAB7A    |
| RELB | RABGAP1L |
| RELB | RANGAP1  |
| RELB | RAP1B    |
| RELB | RAP2C    |
| RELB | RAPGEF6  |
| RELB | RARS     |
| RELB | RASGRP3  |
| RELB | RBBP5    |
| RELB | RBM18    |
| RELB | RBM42    |
| RELB | RBM7     |
| RELB | REL      |
| RELB | RELB     |
| RELB | RHEB     |
| RELB | RHOF     |
| RELB | RHOG     |
| RELB | RHOT2    |
| RELB | RIOK1    |
| RELB | RNF20    |
| RELB | RNF41    |
| RELB | RNF6     |

|      |          |
|------|----------|
| RELB | RNGTT    |
| RELB | RNMT     |
| RELB | RPF1     |
| RELB | RPGR     |
| RELB | RPL27    |
| RELB | RPL37A   |
| RELB | RPL4     |
| RELB | RPL7L1   |
| RELB | RPP21    |
| RELB | RPS17    |
| RELB | RPS18    |
| RELB | RPS6KA3  |
| RELB | RRAS2    |
| RELB | RSBN1    |
| RELB | RSF1     |
| RELB | RTP4     |
| RELB | RUVBL1   |
| RELB | SAP30L   |
| RELB | SART1    |
| RELB | SCMH1    |
| RELB | SDCBP    |
| RELB | SDHAF2   |
| RELB | SDHC     |
| RELB | SEC14L1  |
| RELB | SENP8    |
| RELB | SERF2    |
| RELB | SETD1A   |
| RELB | SETD5    |
| RELB | SF3B1    |
| RELB | SF3B2    |
| RELB | SG02     |
| RELB | SH3KBP1  |
| RELB | SHC1     |
| RELB | SHQ1     |
| RELB | SIRT6    |
| RELB | SLC38A1  |
| RELB | SLC39A1  |
| RELB | SLC39A6  |
| RELB | SLMAP    |
| RELB | SLTM     |
| RELB | SMAD3    |
| RELB | SMAP2    |
| RELB | SMARCA4  |
| RELB | SMARCAL1 |
| RELB | SMARCD2  |
| RELB | SMG6     |
| RELB | SMG7     |
| RELB | SMIM19   |
| RELB | SMIM7    |
| RELB | SMU1     |

|      |             |
|------|-------------|
| RELB | SMURF1      |
| RELB | SNRPB       |
| RELB | SNRPB2      |
| RELB | SNRPD1      |
| RELB | SNRPE       |
| RELB | SNRPF       |
| RELB | SNRPG       |
| RELB | SNX13       |
| RELB | SOGA1       |
| RELB | SOS2        |
| RELB | SP4         |
| RELB | SPN         |
| RELB | SPSB3       |
| RELB | SPTBN1      |
| RELB | SRBD1       |
| RELB | SRRM1       |
| RELB | SRRM2       |
| RELB | SRSF5       |
| RELB | SSBP1       |
| RELB | SSBP2       |
| RELB | ST20        |
| RELB | STAG2       |
| RELB | STK4        |
| RELB | STRADA      |
| RELB | STRAP       |
| RELB | STX16       |
| RELB | STX4        |
| RELB | STXBP3      |
| RELB | SUM01       |
| RELB | SUPT20H     |
| RELB | SUPT4H1     |
| RELB | SWAP70      |
| RELB | SYAP1       |
| RELB | SYF2        |
| RELB | TAF11       |
| RELB | TAF7        |
| RELB | TANK        |
| RELB | TARS2       |
| RELB | TATDN1      |
| RELB | TAX1BP1     |
| RELB | TBC1D1      |
| RELB | TBRG1       |
| RELB | TCF25       |
| RELB | TCP1        |
| RELB | TEX10       |
| RELB | TFDP2       |
| RELB | THOC5       |
| RELB | THUMPD3     |
| RELB | THUMPD3-AS1 |
| RELB | TIGAR       |

RELB TIMM10B  
RELB TINF2  
RELB TM6SF1  
RELB TMED8  
RELB TMEM115  
RELB TMEM199  
RELB TMP0-AS1  
RELB TNFAIP8L1  
RELB TNKS2  
RELB TNRC6A  
RELB TOX  
RELB TPRKB  
RELB TRAF4  
RELB TRAFD1  
RELB TRAPPC10  
RELB TRAPPC8  
RELB TRM0  
RELB TRMT10A  
RELB TRMT6  
RELB TRRAP  
RELB TSG101  
RELB TSSC4  
RELB TTC1  
RELB TTK  
RELB TUFM  
RELB TWF1  
RELB TXNL1  
RELB U2AF2  
RELB U2SURP  
RELB UBA2  
RELB UBALD2  
RELB UBB  
RELB UBE2D3  
RELB UBE2E1  
RELB UBE2J2  
RELB UBL5  
RELB UBR7  
RELB UBXN1  
RELB UCHL3  
RELB UGP2  
RELB UGT8  
RELB URM1  
RELB USE1  
RELB USP4  
RELB UTP14A  
RELB UTP18  
RELB VAC14  
RELB VEZF1  
RELB VPS45  
RELB VPS4B

|      |           |
|------|-----------|
| RELB | VPS72     |
| RELB | VTA1      |
| RELB | WDR73     |
| RELB | XIAP      |
| RELB | XRN1      |
| RELB | YTHDF2    |
| RELB | YTHDF3    |
| RELB | YWHAZ     |
| RELB | ZBTB14    |
| RELB | ZC3H13    |
| RELB | ZCCHC9    |
| RELB | ZEB1      |
| RELB | ZFAS1     |
| RELB | ZNF165    |
| RELB | ZNF408    |
| RELB | ZPR1      |
| RELB | ZSCAN18   |
| RELB | ZWILCH    |
| REST | ABCD4     |
| REST | ABHD14B   |
| REST | ACAA1     |
| REST | ACIN1     |
| REST | ADPGK     |
| REST | AG03      |
| REST | AGPAT3    |
| REST | AGTPBP1   |
| REST | AIFM1     |
| REST | AIP       |
| REST | AK3       |
| REST | AKAP13    |
| REST | AKAP8     |
| REST | AKAP9     |
| REST | AKNA      |
| REST | ALG11     |
| REST | ALG13     |
| REST | ALKBH7    |
| REST | AMMECR1L  |
| REST | ANAPC4    |
| REST | ANKRD27   |
| REST | ANXA6     |
| REST | AP1B1     |
| REST | AP2S1     |
| REST | AP3D1     |
| REST | AP5M1     |
| REST | APBB2     |
| REST | ARHGAP11B |
| REST | ARHGAP18  |
| REST | ARHGAP25  |
| REST | ARHGEF9   |
| REST | ARID4B    |

|      |           |
|------|-----------|
| REST | ARID5B    |
| REST | ARL13B    |
| REST | ARMC10    |
| REST | ARPC3     |
| REST | ASB3      |
| REST | ASB6      |
| REST | ASH1L     |
| REST | ATF2      |
| REST | ATF4      |
| REST | ATF7IP    |
| REST | ATG12     |
| REST | ATG3      |
| REST | ATP6V0D1  |
| REST | ATP6V0E1  |
| REST | ATP6V1H   |
| REST | ATRX      |
| REST | B9D2      |
| REST | BAX       |
| REST | BAZ1B     |
| REST | BAZ2B     |
| REST | BCAT2     |
| REST | BCL10     |
| REST | BCL2L11   |
| REST | BCL3      |
| REST | BCL7A     |
| REST | BECN1     |
| REST | BIRC6     |
| REST | BLNK      |
| REST | BL0C1S2   |
| REST | BL0C1S5   |
| REST | BLZF1     |
| REST | BOD1L1    |
| REST | BPTF      |
| REST | BRD2      |
| REST | BTBD10    |
| REST | BTF3      |
| REST | BTF3L4    |
| REST | C11orf58  |
| REST | C12orf10  |
| REST | C14orf119 |
| REST | C17orf80  |
| REST | C19orf12  |
| REST | C19orf25  |
| REST | C1orf112  |
| REST | C2CD2     |
| REST | C2CD2L    |
| REST | C3orf38   |
| REST | C6orf52   |
| REST | C6orf99   |
| REST | C9orf16   |

|      |          |
|------|----------|
| REST | C9orf40  |
| REST | C9orf64  |
| REST | CAAP1    |
| REST | CAB39    |
| REST | CAP1     |
| REST | CAPZA1   |
| REST | CAPZB    |
| REST | CARM1    |
| REST | CASP8AP2 |
| REST | CCDC115  |
| REST | CCDC12   |
| REST | CCDC174  |
| REST | CCDC186  |
| REST | CCM2     |
| REST | CCNDBP1  |
| REST | CCNL1    |
| REST | CCSER2   |
| REST | CDC16    |
| REST | CDC40    |
| REST | CDC42    |
| REST | CDC42EP3 |
| REST | CDCA2    |
| REST | CDK1     |
| REST | CDK12    |
| REST | CDK5RAP2 |
| REST | CDK9     |
| REST | CENPL    |
| REST | CEP135   |
| REST | CEP44    |
| REST | CEP78    |
| REST | CHD6     |
| REST | CHD9     |
| REST | CHMP1B   |
| REST | CHMP5    |
| REST | CHTOP    |
| REST | CHURC1   |
| REST | CIB1     |
| REST | CIR1     |
| REST | CISD2    |
| REST | CKS2     |
| REST | CLK3     |
| REST | CLN5     |
| REST | CLNS1A   |
| REST | CLPTM1   |
| REST | CMTR2    |
| REST | CN0T4    |
| REST | CN0T6    |
| REST | CNP      |
| REST | CNR1     |
| REST | COA5     |

|      |          |
|------|----------|
| REST | COBLL1   |
| REST | COMMD6   |
| REST | COPB2    |
| REST | COPS5    |
| REST | COX4I1   |
| REST | CPNE1    |
| REST | CPSF2    |
| REST | CSAD     |
| REST | CSNK1A1  |
| REST | CSNK2A1  |
| REST | CSTF3    |
| REST | CTCF     |
| REST | CTNNB1   |
| REST | CTNNBIP1 |
| REST | CWC27    |
| REST | CXorf38  |
| REST | CYB561A3 |
| REST | DAAM1    |
| REST | DALRD3   |
| REST | DAXX     |
| REST | DBNL     |
| REST | DCAF5    |
| REST | DCP1A    |
| REST | DDB2     |
| REST | DDX17    |
| REST | DDX23    |
| REST | DDX24    |
| REST | DDX5     |
| REST | DDX50    |
| REST | DDX59    |
| REST | DGU0K    |
| REST | DHX36    |
| REST | DHX38    |
| REST | DHX9     |
| REST | DICER1   |
| REST | DNAJB14  |
| REST | DNAJC4   |
| REST | DOCK8    |
| REST | DPAGT1   |
| REST | DYM      |
| REST | E2F5     |
| REST | EAPP     |
| REST | ECH1     |
| REST | ECSIT    |
| REST | EEF1A1   |
| REST | EEF2     |
| REST | EFHD2    |
| REST | EFTUD2   |
| REST | EIF2A    |
| REST | EIF2AK3  |



|      |              |
|------|--------------|
| REST | EIF3A        |
| REST | EIF3D        |
| REST | EIF3F        |
| REST | EIF3G        |
| REST | EIF3H        |
| REST | EIF3L        |
| REST | EIF4A2       |
| REST | EIF4G3       |
| REST | ELAC2        |
| REST | ELM01        |
| REST | ELOF1        |
| REST | ELOVL5       |
| REST | EP300        |
| REST | EPB41L4A-AS1 |
| REST | EPC1         |
| REST | EPN2         |
| REST | ERBIN        |
| REST | ESD          |
| REST | ETS1         |
| REST | EVI2B        |
| REST | EXOSC5       |
| REST | FAAP20       |
| REST | FAM107B      |
| REST | FAM160A2     |
| REST | FAM173A      |
| REST | FAM177A1     |
| REST | FAM184A      |
| REST | FAM204A      |
| REST | FAM219B      |
| REST | FAM49B       |
| REST | FAM69A       |
| REST | FAM8A1       |
| REST | FAM96A       |
| REST | FBXL5        |
| REST | FBXW2        |
| REST | FES          |
| REST | FIBP         |
| REST | FMR1         |
| REST | FNBP4        |
| REST | FNTA         |
| REST | FRYL         |
| REST | FUT8         |
| REST | GABARAPL2    |
| REST | GCC2         |
| REST | GFOD2        |
| REST | GGPS1        |
| REST | GIGYF2       |
| REST | GLTP         |
| REST | GNAI3        |
| REST | GNPTG        |

|      |           |
|------|-----------|
| REST | GOLGA1    |
| REST | GOLGA7    |
| REST | GOLPH3    |
| REST | GOPC      |
| REST | GPATCH11  |
| REST | GPATCH2L  |
| REST | GPATCH8   |
| REST | GPBP1     |
| REST | GPSM3     |
| REST | GRAMD4    |
| REST | GRB2      |
| REST | GRIPAP1   |
| REST | GSTM3     |
| REST | GTF2H3    |
| REST | GTF2IRD2B |
| REST | GTF3C5    |
| REST | GUCD1     |
| REST | HARS2     |
| REST | HDAC8     |
| REST | HDLBP     |
| REST | HECTD1    |
| REST | HELZ      |
| REST | HIGD2A    |
| REST | HNRNPA3   |
| REST | HNRNPD    |
| REST | HNRNPL    |
| REST | HNRNPLL   |
| REST | HNRNPU    |
| REST | HPF1      |
| REST | HSPA4     |
| REST | IDH3G     |
| REST | IDI1      |
| REST | IER3IP1   |
| REST | IL16      |
| REST | IN080D    |
| REST | INTS5     |
| REST | IQGAP2    |
| REST | IRF2      |
| REST | IRF5      |
| REST | ISCU      |
| REST | ISG20L2   |
| REST | IST1      |
| REST | ISY1      |
| REST | ITGB1     |
| REST | ITSN2     |
| REST | JAK1      |
| REST | JMJD1C    |
| REST | JPX       |
| REST | JTB       |
| REST | JUN       |

|      |           |
|------|-----------|
| REST | KANSL1    |
| REST | KCMF1     |
| REST | KCNN4     |
| REST | KDEL3     |
| REST | KHNYN     |
| REST | KIAA0040  |
| REST | KIF20B    |
| REST | KIN       |
| REST | KLHL36    |
| REST | KLHL6     |
| REST | KMT2C     |
| REST | KMT2E     |
| REST | LAMTOR1   |
| REST | LAMTOR4   |
| REST | LAP3      |
| REST | LAPTM5    |
| REST | LASP1     |
| REST | LCORL     |
| REST | LEPROTL1  |
| REST | LINC00909 |
| REST | LINC01215 |
| REST | LITAF     |
| REST | LM07      |
| REST | LPAR5     |
| REST | LRIF1     |
| REST | LRRC58    |
| REST | LSG1      |
| REST | LSP1      |
| REST | LTBP4     |
| REST | LYL1      |
| REST | LYPLA2    |
| REST | MAGED2    |
| REST | MAGEF1    |
| REST | MAP2K1    |
| REST | MAP2K6    |
| REST | MAPK14    |
| REST | MAPK1IP1L |
| REST | MARCH7    |
| REST | MAT2B     |
| REST | MBTPS2    |
| REST | MCL1      |
| REST | MDH1      |
| REST | MEF2C     |
| REST | MEPCE     |
| REST | METTL18   |
| REST | METTL21A  |
| REST | METTL22   |
| REST | MFSD10    |
| REST | MFSD11    |
| REST | MGA       |

|      |         |
|------|---------|
| REST | MIEN1   |
| REST | MINPP1  |
| REST | MITD1   |
| REST | MIXL1   |
| REST | MMADHC  |
| REST | MOB1A   |
| REST | MOC52   |
| REST | MORC3   |
| REST | MPG     |
| REST | MPV17   |
| REST | MPZL1   |
| REST | MRPL28  |
| REST | MRPL39  |
| REST | MRPS10  |
| REST | MRPS18A |
| REST | MTIF2   |
| REST | MTIF3   |
| REST | MTMR14  |
| REST | MTR     |
| REST | MUS81   |
| REST | MYO19   |
| REST | N4BP3   |
| REST | NAA60   |
| REST | NABP2   |
| REST | NACA    |
| REST | NAIF1   |
| REST | NCK2    |
| REST | NCKAP1L |
| REST | NDRG3   |
| REST | NDUFA13 |
| REST | NDUFB3  |
| REST | NDUFB5  |
| REST | NDUFS1  |
| REST | NDUFS2  |
| REST | NEAT1   |
| REST | NEDD9   |
| REST | NF1     |
| REST | NFATC1  |
| REST | NFYB    |
| REST | NKIRAS2 |
| REST | NONO    |
| REST | NOP10   |
| REST | NOSIP   |
| REST | NR1H2   |
| REST | NSD1    |
| REST | NT5C    |
| REST | NT5DC3  |
| REST | NTMT1   |
| REST | NUBP1   |
| REST | NUBP2   |

|      |         |
|------|---------|
| REST | NUDCD3  |
| REST | NUP43   |
| REST | OCIAD1  |
| REST | ODF2    |
| REST | ORC4    |
| REST | OSGIN2  |
| REST | OST4    |
| REST | OSTF1   |
| REST | PABPN1  |
| REST | PAK2    |
| REST | PAP0LA  |
| REST | PAPSS1  |
| REST | PARK7   |
| REST | PAWR    |
| REST | PAX5    |
| REST | PCBP1   |
| REST | PCBP2   |
| REST | PCED1B  |
| REST | PCF11   |
| REST | PCNX4   |
| REST | PCSK7   |
| REST | PDCD6   |
| REST | PDCD6IP |
| REST | PDHX    |
| REST | PDPK1   |
| REST | PDS5B   |
| REST | PEX16   |
| REST | PEX2    |
| REST | PFDN5   |
| REST | PGAP2   |
| REST | PHACTR4 |
| REST | PHF21A  |
| REST | PIGB0S1 |
| REST | PIK3C2B |
| REST | PIK3CG  |
| REST | PITPNA  |
| REST | PJA2    |
| REST | PMPCB   |
| REST | PNISR   |
| REST | PNPLA8  |
| REST | POLDIP3 |
| REST | POP4    |
| REST | POU2F1  |
| REST | PPID    |
| REST | PPIP5K2 |
| REST | PPP2R1A |
| REST | PPP2R2A |
| REST | PPP2R5B |
| REST | PPP3R1  |
| REST | PPP6R3  |

|      |          |
|------|----------|
| REST | PPTC7    |
| REST | PRCP     |
| REST | PRDM2    |
| REST | PRKAG1   |
| REST | PRKAR1A  |
| REST | PRKCD    |
| REST | PRKCI    |
| REST | PRKRA    |
| REST | PRKRIP1  |
| REST | PRPF38A  |
| REST | PRR13    |
| REST | PRRC1    |
| REST | PRRC2C   |
| REST | PSMB1    |
| REST | PSMB7    |
| REST | PTPN12   |
| REST | PTPRA    |
| REST | PTPRC    |
| REST | PTPRE    |
| REST | PTPRJ    |
| REST | PTRHD1   |
| REST | PXN      |
| REST | PYCR2    |
| REST | PYM1     |
| REST | PYROXD1  |
| REST | RAB11B   |
| REST | RAB14    |
| REST | RAB18    |
| REST | RAB1B    |
| REST | RAB3GAP2 |
| REST | RAB5B    |
| REST | RAB5C    |
| REST | RAC1     |
| REST | RACK1    |
| REST | RAD23A   |
| REST | RAD54L2  |
| REST | RAF1     |
| REST | RALY     |
| REST | RAP1A    |
| REST | RASAL3   |
| REST | RASSF5   |
| REST | RB1      |
| REST | RB1CC1   |
| REST | RBBP6    |
| REST | RBM18    |
| REST | RBM25    |
| REST | RBM26    |
| REST | RBM42    |
| REST | RBMX2    |
| REST | RCHY1    |

|      |         |
|------|---------|
| REST | RER1    |
| REST | REST    |
| REST | RGP1    |
| REST | RGS3    |
| REST | RHBDD1  |
| REST | RIC8B   |
| REST | RIPK3   |
| REST | RNF20   |
| REST | RNF220  |
| REST | RNF34   |
| REST | RNF6    |
| REST | ROCK1   |
| REST | ROM01   |
| REST | RPL10   |
| REST | RPL10A  |
| REST | RPL11   |
| REST | RPL12   |
| REST | RPL13A  |
| REST | RPL15   |
| REST | RPL18A  |
| REST | RPL19   |
| REST | RPL21   |
| REST | RPL23   |
| REST | RPL23A  |
| REST | RPL26   |
| REST | RPL26L1 |
| REST | RPL27   |
| REST | RPL27A  |
| REST | RPL28   |
| REST | RPL29   |
| REST | RPL3    |
| REST | RPL30   |
| REST | RPL31   |
| REST | RPL32   |
| REST | RPL34   |
| REST | RPL35A  |
| REST | RPL36   |
| REST | RPL37   |
| REST | RPL37A  |
| REST | RPL38   |
| REST | RPL4    |
| REST | RPL41   |
| REST | RPL6    |
| REST | RPL8    |
| REST | RPP25L  |
| REST | RPRD1A  |
| REST | RPS10   |
| REST | RPS11   |
| REST | RPS13   |
| REST | RPS14   |

|      |         |
|------|---------|
| REST | RPS15   |
| REST | RPS15A  |
| REST | RPS16   |
| REST | RPS18   |
| REST | RPS19   |
| REST | RPS2    |
| REST | RPS20   |
| REST | RPS25   |
| REST | RPS27   |
| REST | RPS27A  |
| REST | RPS29   |
| REST | RPS3    |
| REST | RPS3A   |
| REST | RPS4X   |
| REST | RPS6    |
| REST | RPS7    |
| REST | RPS8    |
| REST | RPSA    |
| REST | RRNAD1  |
| REST | RSRC2   |
| REST | RSRP1   |
| REST | RTN4    |
| REST | RWDD4   |
| REST | SASH3   |
| REST | SCAMP4  |
| REST | SCNM1   |
| REST | SC0C    |
| REST | SCRN1   |
| REST | SDCCAG8 |
| REST | SDHB    |
| REST | SDHD    |
| REST | SEC24C  |
| REST | SEPT2   |
| REST | SEPT7   |
| REST | SERINC3 |
| REST | SERTAD1 |
| REST | SERTAD2 |
| REST | SF3B6   |
| REST | SFSWAP  |
| REST | SFT2D1  |
| REST | SFT2D2  |
| REST | SH2B2   |
| REST | SH3BGRL |
| REST | SH3BP5  |
| REST | SHKBP1  |
| REST | SH0C2   |
| REST | SHPRH   |
| REST | SIKE1   |
| REST | SIMC1   |
| REST | SIRT7   |



|      |          |
|------|----------|
| REST | SKAP2    |
| REST | SLC16A3  |
| REST | SLC17A5  |
| REST | SLC20A2  |
| REST | SLC25A4  |
| REST | SLC35A2  |
| REST | SLC35A3  |
| REST | SLC35C2  |
| REST | SLC35E1  |
| REST | SLC44A1  |
| REST | SLC9A3R1 |
| REST | SLF1     |
| REST | SLMAP    |
| REST | SLU7     |
| REST | SLX4IP   |
| REST | SMAD2    |
| REST | SMARCA2  |
| REST | SMARCA4  |
| REST | SMC3     |
| REST | SMCHD1   |
| REST | SMIM14   |
| REST | SMU1     |
| REST | SNN      |
| REST | SNRPN    |
| REST | SNURF    |
| REST | SNX13    |
| REST | SPAG7    |
| REST | SPG21    |
| REST | SPSB1    |
| REST | SPSB2    |
| REST | SQLF     |
| REST | SREBF2   |
| REST | SRP14    |
| REST | SRRM2    |
| REST | SRRT     |
| REST | SRSF4    |
| REST | SRSF5    |
| REST | SRSF6    |
| REST | SS18     |
| REST | SSU72    |
| REST | STARD5   |
| REST | STAT3    |
| REST | STAU2    |
| REST | STIM2    |
| REST | STK10    |
| REST | STK16    |
| REST | STK4     |
| REST | STT3B    |
| REST | STUB1    |
| REST | SUCLA2   |

|      |              |
|------|--------------|
| REST | SUPT20H      |
| REST | SUPT4H1      |
| REST | SYF2         |
| REST | SYMPK        |
| REST | SYNJ2BP      |
| REST | SZRD1        |
| REST | SZT2         |
| REST | TAF1         |
| REST | TAF12        |
| REST | TAF15        |
| REST | TAF1B        |
| REST | TAF7         |
| REST | TANG02       |
| REST | TA0K1        |
| REST | TA0K3        |
| REST | TBC1D14      |
| REST | TBK1         |
| REST | TBL1XR1      |
| REST | TCEAL1       |
| REST | TCERG1       |
| REST | TCF25        |
| REST | TCF4         |
| REST | TERF1        |
| REST | TERF2IP      |
| REST | TEX10        |
| REST | TFCP2        |
| REST | TFIP11       |
| REST | TGIF1        |
| REST | THAP4        |
| REST | THOC3        |
| REST | THRAP3       |
| REST | TIA1         |
| REST | TIGAR        |
| REST | TINF2        |
| REST | TLN1         |
| REST | TM2D1        |
| REST | TM9SF3       |
| REST | TMBIM4       |
| REST | TMC6         |
| REST | TMEM161B-AS1 |
| REST | TMEM175      |
| REST | TMEM219      |
| REST | TMEM230      |
| REST | TMEM234      |
| REST | TMEM259      |
| REST | TMEM30A      |
| REST | TMEM59       |
| REST | TMEM60       |
| REST | TMSB4X       |
| REST | TNRC6B       |

|      |          |
|------|----------|
| REST | TOP2B    |
| REST | TOX4     |
| REST | TP53I11  |
| REST | TRA2A    |
| REST | TRABD    |
| REST | TRAF6    |
| REST | TRAPPC12 |
| REST | TRAPPC2L |
| REST | TRAPPC3  |
| REST | TRAPPC6A |
| REST | TRIM11   |
| REST | TRIM24   |
| REST | TRIM4    |
| REST | TRIP4    |
| REST | TSC1     |
| REST | TSC22D2  |
| REST | TSP0     |
| REST | TTC13    |
| REST | TTC14    |
| REST | TUBGCP2  |
| REST | TXN2     |
| REST | UBA52    |
| REST | UBA6     |
| REST | UBAC1    |
| REST | UBC      |
| REST | UBE2K    |
| REST | UBE3C    |
| REST | UBL7     |
| REST | UBOX5    |
| REST | UBXN11   |
| REST | UBXN6    |
| REST | UCKL1    |
| REST | UFC1     |
| REST | UFSP2    |
| REST | UGDH     |
| REST | UHRF2    |
| REST | UNC13D   |
| REST | UNC45A   |
| REST | UPF2     |
| REST | UQCR11   |
| REST | UQCRC2   |
| REST | UROD     |
| REST | USP10    |
| REST | USP47    |
| REST | USP49    |
| REST | USP8     |
| REST | USPL1    |
| REST | UTP23    |
| REST | UTP3     |
| REST | UTY      |

|      |         |
|------|---------|
| REST | UXT     |
| REST | VANGL1  |
| REST | VAPB    |
| REST | VASP    |
| REST | VDR     |
| REST | VMA21   |
| REST | VMP1    |
| REST | VPS4B   |
| REST | VRK3    |
| REST | WAC     |
| REST | WASF2   |
| REST | WBP11   |
| REST | WDR13   |
| REST | WDR70   |
| REST | WSB1    |
| REST | XAB2    |
| REST | XPC     |
| REST | YBEY    |
| REST | YIPF3   |
| REST | YKT6    |
| REST | YME1L1  |
| REST | YPEL3   |
| REST | YPEL5   |
| REST | YTHDC1  |
| REST | YWHAZ   |
| REST | ZBTB20  |
| REST | ZBTB25  |
| REST | ZBTB43  |
| REST | ZBTB44  |
| REST | ZBTB7A  |
| REST | ZC3H12A |
| REST | ZDHHC5  |
| REST | ZFAND6  |
| REST | ZFAS1   |
| REST | ZFC3H1  |
| REST | ZFP62   |
| REST | ZHX2    |
| REST | ZNF24   |
| REST | ZNF524  |
| REST | ZNF544  |
| REST | ZNF587  |
| REST | ZNF638  |
| REST | ZNF644  |
| REST | ZNF655  |
| REST | ZNF675  |
| REST | ZNF691  |
| REST | ZNF821  |
| REST | ZRANB2  |
| REST | ZRANB3  |
| REST | ZSCAN21 |

|      |          |
|------|----------|
| RFX2 | RFX2     |
| RFX5 | ABCA7    |
| RFX5 | ACAP2    |
| RFX5 | ACSS1    |
| RFX5 | AFF3     |
| RFX5 | AGFG1    |
| RFX5 | AICDA    |
| RFX5 | AIFM1    |
| RFX5 | AKTIP    |
| RFX5 | ALPK1    |
| RFX5 | ANKHD1   |
| RFX5 | ANKMY2   |
| RFX5 | ANKRD54  |
| RFX5 | ANKZF1   |
| RFX5 | ANP32E   |
| RFX5 | AP1AR    |
| RFX5 | APOLD1   |
| RFX5 | ARID4B   |
| RFX5 | ARL6IP1  |
| RFX5 | ASB8     |
| RFX5 | ASPH     |
| RFX5 | ASPM     |
| RFX5 | ATRIP    |
| RFX5 | ATXN1    |
| RFX5 | AURKA    |
| RFX5 | AURKB    |
| RFX5 | BASP1    |
| RFX5 | BIRC3    |
| RFX5 | BTN2A2   |
| RFX5 | C12orf49 |
| RFX5 | C1orf109 |
| RFX5 | C2orf69  |
| RFX5 | CALM2    |
| RFX5 | CAMK2B   |
| RFX5 | CCAR2    |
| RFX5 | CCDC102A |
| RFX5 | CCNB1    |
| RFX5 | CCNB2    |
| RFX5 | CCNG2    |
| RFX5 | CCSER2   |
| RFX5 | CD180    |
| RFX5 | CD40     |
| RFX5 | CD74     |
| RFX5 | CDC20    |
| RFX5 | CDCA2    |
| RFX5 | CDCA3    |
| RFX5 | CDCA8    |
| RFX5 | CDK1     |
| RFX5 | CDK14    |
| RFX5 | CDKN3    |

|      |           |
|------|-----------|
| RFX5 | CENPA     |
| RFX5 | CENPC     |
| RFX5 | CENPE     |
| RFX5 | CENPF     |
| RFX5 | CENPI     |
| RFX5 | CEP164    |
| RFX5 | CETN3     |
| RFX5 | CGGBP1    |
| RFX5 | CKAP2     |
| RFX5 | CKS1B     |
| RFX5 | CKS2      |
| RFX5 | COMMD10   |
| RFX5 | COMTD1    |
| RFX5 | DAZAP2    |
| RFX5 | DCAF6     |
| RFX5 | DENND4A   |
| RFX5 | DEPDC1B   |
| RFX5 | DHX15     |
| RFX5 | DLGAP5    |
| RFX5 | DOCK2     |
| RFX5 | DYNC1I2   |
| RFX5 | DYNLL1    |
| RFX5 | DYNLL2    |
| RFX5 | E2F5      |
| RFX5 | EFNA4     |
| RFX5 | ELF4      |
| RFX5 | ELM02     |
| RFX5 | EMC9      |
| RFX5 | EML4      |
| RFX5 | ERCC6L    |
| RFX5 | FAM107B   |
| RFX5 | FAM111A   |
| RFX5 | FAM120A0S |
| RFX5 | FAM135A   |
| RFX5 | FCH01     |
| RFX5 | FDFT1     |
| RFX5 | FHIT      |
| RFX5 | FRMD8     |
| RFX5 | FYTTD1    |
| RFX5 | GFOD1     |
| RFX5 | GPSM2     |
| RFX5 | GRAP2     |
| RFX5 | GTF2E2    |
| RFX5 | GTSE1     |
| RFX5 | GYPC      |
| RFX5 | GZF1      |
| RFX5 | HDAC9     |
| RFX5 | HIST1H1E  |
| RFX5 | HIST1H4C  |
| RFX5 | HLA-DMA   |

|      |           |
|------|-----------|
| RFX5 | HLA-DMB   |
| RFX5 | HLA-DOA   |
| RFX5 | HLA-DOB   |
| RFX5 | HLA-DPA1  |
| RFX5 | HLA-DPB1  |
| RFX5 | HLA-DQA1  |
| RFX5 | HLA-DQB1  |
| RFX5 | HLA-DRA   |
| RFX5 | HLA-DRB1  |
| RFX5 | HMMR      |
| RFX5 | HSD17B11  |
| RFX5 | IARS      |
| RFX5 | ID2       |
| RFX5 | IFT74     |
| RFX5 | INCENP    |
| RFX5 | ISCA2     |
| RFX5 | IVD       |
| RFX5 | KIF14     |
| RFX5 | KIF20A    |
| RFX5 | KIF20B    |
| RFX5 | KIF22     |
| RFX5 | KIF23     |
| RFX5 | KIF4A     |
| RFX5 | KIF5B     |
| RFX5 | KIFC1     |
| RFX5 | KMT5A     |
| RFX5 | KPNA2     |
| RFX5 | KPNA4     |
| RFX5 | LARP7     |
| RFX5 | LBR       |
| RFX5 | LINC00665 |
| RFX5 | LINC00909 |
| RFX5 | LM02      |
| RFX5 | LM07      |
| RFX5 | LONRF1    |
| RFX5 | LPIN1     |
| RFX5 | LPP       |
| RFX5 | LRCH4     |
| RFX5 | LRMP      |
| RFX5 | LRRC37B   |
| RFX5 | LSM5      |
| RFX5 | LYSMD2    |
| RFX5 | MADD      |
| RFX5 | MAPK1     |
| RFX5 | MARCKSL1  |
| RFX5 | MED30     |
| RFX5 | MED6      |
| RFX5 | MED8      |
| RFX5 | MFF       |
| RFX5 | MIDN      |

|      |            |
|------|------------|
| RFX5 | MKI67      |
| RFX5 | MME        |
| RFX5 | MPRIP      |
| RFX5 | MS4A1      |
| RFX5 | MTFR1      |
| RFX5 | MTFR2      |
| RFX5 | MXD3       |
| RFX5 | NCAPH      |
| RFX5 | NFATC3     |
| RFX5 | NFYC       |
| RFX5 | NINJ2      |
| RFX5 | NR3C1      |
| RFX5 | NRF1       |
| RFX5 | NUP37      |
| RFX5 | NUP88      |
| RFX5 | NUTM2B-AS1 |
| RFX5 | OIP5       |
| RFX5 | OSBPL8     |
| RFX5 | P2RX5      |
| RFX5 | PARPBP     |
| RFX5 | PAX5       |
| RFX5 | PBK        |
| RFX5 | PDCD10     |
| RFX5 | PDPK1      |
| RFX5 | PEX16      |
| RFX5 | PGAP2      |
| RFX5 | PHF6       |
| RFX5 | PHTF2      |
| RFX5 | PIF1       |
| RFX5 | PISD       |
| RFX5 | PLK1       |
| RFX5 | POLD4      |
| RFX5 | POLR2G     |
| RFX5 | POU3F1     |
| RFX5 | PPM1B      |
| RFX5 | PPM1N      |
| RFX5 | PPP2R2D    |
| RFX5 | PPP2R5E    |
| RFX5 | PRC1       |
| RFX5 | PRPSAP2    |
| RFX5 | PRRC2C     |
| RFX5 | PSAT1      |
| RFX5 | PSME3      |
| RFX5 | PSRC1      |
| RFX5 | PTTG1      |
| RFX5 | RAD21      |
| RFX5 | RALBP1     |
| RFX5 | RANGRF     |
| RFX5 | RAPGEF1    |
| RFX5 | RBMXL1     |



|      |          |
|------|----------|
| RFX5 | RECQL    |
| RFX5 | RELB     |
| RFX5 | RFX5     |
| RFX5 | RGS16    |
| RFX5 | RICTOR   |
| RFX5 | RNASEL   |
| RFX5 | RNF26    |
| RFX5 | RNF44    |
| RFX5 | RNF5     |
| RFX5 | RSRC2    |
| RFX5 | RYBP     |
| RFX5 | S100A10  |
| RFX5 | SGMS1    |
| RFX5 | SG01     |
| RFX5 | SG02     |
| RFX5 | SH2B1    |
| RFX5 | SH2B2    |
| RFX5 | SLC1A1   |
| RFX5 | SMAP2    |
| RFX5 | SMARCAL1 |
| RFX5 | SMG9     |
| RFX5 | SMIM12   |
| RFX5 | SNAP23   |
| RFX5 | SPAG5    |
| RFX5 | SPATA13  |
| RFX5 | SPATA24  |
| RFX5 | STAMBPL1 |
| RFX5 | STARD4   |
| RFX5 | STAT6    |
| RFX5 | SULF2    |
| RFX5 | SUV39H1  |
| RFX5 | SYPL1    |
| RFX5 | SYT17    |
| RFX5 | TACC3    |
| RFX5 | TAX1BP3  |
| RFX5 | TBC1D22B |
| RFX5 | TBP      |
| RFX5 | TGDS     |
| RFX5 | THAP8    |
| RFX5 | TIPARP   |
| RFX5 | TJAP1    |
| RFX5 | TLE4     |
| RFX5 | TMEM131  |
| RFX5 | TMP0     |
| RFX5 | TOMM40L  |
| RFX5 | TOP2A    |
| RFX5 | TP53BP1  |
| RFX5 | TPCN1    |
| RFX5 | TPX2     |
| RFX5 | TRAK1    |

|       |          |
|-------|----------|
| RFX5  | TRAPPC6B |
| RFX5  | TRIM59   |
| RFX5  | TRMT1L   |
| RFX5  | TROAP    |
| RFX5  | TSPAN14  |
| RFX5  | TUBA1C   |
| RFX5  | TUBB4B   |
| RFX5  | UBB      |
| RFX5  | UBE2A    |
| RFX5  | UBE2C    |
| RFX5  | UBE2D3   |
| RFX5  | UBE2S    |
| RFX5  | UBP1     |
| RFX5  | UCP2     |
| RFX5  | UNC119B  |
| RFX5  | UNG      |
| RFX5  | USP32    |
| RFX5  | USP53    |
| RFX5  | VGLL4    |
| RFX5  | VPS16    |
| RFX5  | VPS72    |
| RFX5  | WDR62    |
| RFX5  | XP06     |
| RFX5  | YY1      |
| RFX5  | ZMAT3    |
| RFX5  | ZMIZ1    |
| RFX5  | ZNF444   |
| RFX5  | ZNF486   |
| RFX5  | ZNF775   |
| RFX5  | ZSWIM8   |
| RORA  | ACP5     |
| RORA  | CAPN2    |
| RORA  | LMNA     |
| RORA  | LPXN     |
| RORA  | PLCD3    |
| RORA  | RGS14    |
| RORA  | RORA     |
| RORA  | SOX12    |
| RORA  | TTC39C   |
| RREB1 | RREB1    |
| RREB1 | SERPINE2 |
| RREB1 | SIN3A    |
| RUNX1 | RUNX1    |
| RUNX1 | TJP1     |
| RUNX2 | PRDM2    |
| RUNX2 | PSMA6    |
| RUNX2 | RUNX1    |
| RUNX2 | RUNX2    |
| RUNX2 | SULF2    |
| RUNX2 | TCF4     |

|        |          |
|--------|----------|
| RUNX2  | ZKSCAN1  |
| RXRA   | C18orf25 |
| RXRA   | CAMK1D   |
| RXRA   | CASP7    |
| RXRA   | CCL22    |
| RXRA   | CCND2    |
| RXRA   | CFLAR    |
| RXRA   | CHST15   |
| RXRA   | CSF2RB   |
| RXRA   | CXorf40B |
| RXRA   | DUS3L    |
| RXRA   | DUSP2    |
| RXRA   | LGALS1   |
| RXRA   | LRBA     |
| RXRA   | PDE4B    |
| RXRA   | PLAGL1   |
| RXRA   | PRKCSH   |
| RXRA   | PRR3     |
| RXRA   | QSER1    |
| RXRA   | RASSF2   |
| RXRA   | RNF2     |
| RXRA   | RXRA     |
| RXRA   | SLA      |
| RXRA   | SLC37A1  |
| RXRA   | SNX12    |
| RXRA   | TESPA1   |
| RXRA   | TRIP10   |
| RXRA   | TYW3     |
| RXRA   | ZBTB32   |
| SETDB1 | AHCY     |
| SETDB1 | ARL6     |
| SETDB1 | BORCS7   |
| SETDB1 | CDC25A   |
| SETDB1 | CDC40    |
| SETDB1 | COX7C    |
| SETDB1 | IFRD2    |
| SETDB1 | MCTP2    |
| SETDB1 | MFSD3    |
| SETDB1 | NRDE2    |
| SETDB1 | RUNX3    |
| SETDB1 | SLF2     |
| SETDB1 | SMG1     |
| SETDB1 | TP53I11  |
| SETDB1 | VPS41    |
| SETDB1 | ZNF224   |
| SOX4   | TRIB2    |
| SOX5   | ADNP     |
| SOX5   | AGFG2    |
| SOX5   | APBB2    |
| SOX5   | CDC42EP3 |

|      |          |
|------|----------|
| S0X5 | CYP39A1  |
| S0X5 | GPATCH2L |
| S0X5 | GPR180   |
| S0X5 | NRF1     |
| S0X5 | PELI1    |
| S0X5 | S0X5     |
| S0X5 | TMEM251  |
| SP1  | ADIPOR2  |
| SP1  | ANKRD44  |
| SP1  | ARID4A   |
| SP1  | ARIH1    |
| SP1  | CDR2     |
| SP1  | CHD6     |
| SP1  | EFNA4    |
| SP1  | EGR2     |
| SP1  | FYN      |
| SP1  | GFOD1    |
| SP1  | GIGYF1   |
| SP1  | HES1     |
| SP1  | IER5     |
| SP1  | IRS2     |
| SP1  | KCTD9    |
| SP1  | MAP1B    |
| SP1  | METTTL2A |
| SP1  | RASA3    |
| SP1  | RNF24    |
| SP1  | RPS6KA5  |
| SP1  | SERTAD2  |
| SP1  | SHC1     |
| SP1  | SLC38A2  |
| SP1  | SP1      |
| SP1  | ST7      |
| SP1  | TFB1M    |
| SP1  | ZC2HC1A  |
| SP2  | ABHD13   |
| SP2  | ACACA    |
| SP2  | ACTN4    |
| SP2  | ACTR1A   |
| SP2  | AGGF1    |
| SP2  | ALDH16A1 |
| SP2  | ANKRD39  |
| SP2  | ARFIP1   |
| SP2  | ARHGAP27 |
| SP2  | ARHGEF7  |
| SP2  | ARRDC3   |
| SP2  | ATP6V1B2 |
| SP2  | ATR      |
| SP2  | AZI2     |
| SP2  | BAG4     |
| SP2  | BDH1     |

|     |           |
|-----|-----------|
| SP2 | BIRC2     |
| SP2 | BRAP      |
| SP2 | CANT1     |
| SP2 | CCDC124   |
| SP2 | CCDC14    |
| SP2 | CCDC167   |
| SP2 | CCM2      |
| SP2 | CCNH      |
| SP2 | CD2AP     |
| SP2 | CDKN1A    |
| SP2 | CDS2      |
| SP2 | CEP44     |
| SP2 | CHEK2     |
| SP2 | CHUK      |
| SP2 | CMTR2     |
| SP2 | COMMD10   |
| SP2 | COX17     |
| SP2 | COX20     |
| SP2 | CTBS      |
| SP2 | CTU1      |
| SP2 | CYB5R1    |
| SP2 | DEDD2     |
| SP2 | DEPDC5    |
| SP2 | DPP9      |
| SP2 | DYNLL1    |
| SP2 | ECI2      |
| SP2 | EIF4E2    |
| SP2 | ELM02     |
| SP2 | EMC3      |
| SP2 | EP300     |
| SP2 | ERP29     |
| SP2 | ETV2      |
| SP2 | EX01      |
| SP2 | FAM174A   |
| SP2 | FH        |
| SP2 | FKBP1B    |
| SP2 | G6PC3     |
| SP2 | GADD45B   |
| SP2 | GAK       |
| SP2 | GBA       |
| SP2 | GHITM     |
| SP2 | GLA       |
| SP2 | GM2A      |
| SP2 | GPAA1     |
| SP2 | GPAT4     |
| SP2 | GPR89A    |
| SP2 | GTF2H1    |
| SP2 | HDAC6     |
| SP2 | HID1      |
| SP2 | HIST2H2AC |

|     |           |
|-----|-----------|
| SP2 | HMG20B    |
| SP2 | HMGA1     |
| SP2 | HRAS      |
| SP2 | IER3IP1   |
| SP2 | IKBIP     |
| SP2 | IRF4      |
| SP2 | JKAMP     |
| SP2 | JOSD1     |
| SP2 | KAT6B     |
| SP2 | KAT7      |
| SP2 | KCNMB3    |
| SP2 | KCTD17    |
| SP2 | KIAA1551  |
| SP2 | KLF6      |
| SP2 | KRI1      |
| SP2 | L3MBTL3   |
| SP2 | LAMP2     |
| SP2 | LEPROT    |
| SP2 | LIN7B     |
| SP2 | LINC01224 |
| SP2 | LINC01431 |
| SP2 | MAK16     |
| SP2 | METTTL2B  |
| SP2 | MIB2      |
| SP2 | MLH1      |
| SP2 | MPC2      |
| SP2 | MRPL43    |
| SP2 | MTIF2     |
| SP2 | MTRF1L    |
| SP2 | MTX2      |
| SP2 | MYC       |
| SP2 | NAPA      |
| SP2 | NCK2      |
| SP2 | NECAP1    |
| SP2 | NEK9      |
| SP2 | NRDE2     |
| SP2 | NT5DC2    |
| SP2 | NUP214    |
| SP2 | NUTF2     |
| SP2 | OGG1      |
| SP2 | ORC4      |
| SP2 | ORMDL2    |
| SP2 | PARP10    |
| SP2 | PARVG     |
| SP2 | PAXBP1    |
| SP2 | PCIF1     |
| SP2 | PCY0X1    |
| SP2 | PDS5A     |
| SP2 | PDXK      |
| SP2 | PHRF1     |

|     |          |
|-----|----------|
| SP2 | PI4K2B   |
| SP2 | PI4KB    |
| SP2 | PIGT     |
| SP2 | PILRB    |
| SP2 | PLEKH02  |
| SP2 | POLA1    |
| SP2 | PRKCD    |
| SP2 | PRPS2    |
| SP2 | PTPN4    |
| SP2 | PTPRS    |
| SP2 | PTS      |
| SP2 | PWWP2A   |
| SP2 | QS0X2    |
| SP2 | RAB2A    |
| SP2 | RAB3GAP2 |
| SP2 | RALGAPB  |
| SP2 | RHOQ     |
| SP2 | RNF121   |
| SP2 | RNF146   |
| SP2 | RNF149   |
| SP2 | RRM2     |
| SP2 | RSU1     |
| SP2 | SASS6    |
| SP2 | SCMH1    |
| SP2 | SDHB     |
| SP2 | SEC24D   |
| SP2 | SHCBP1   |
| SP2 | SHMT1    |
| SP2 | SLC35F5  |
| SP2 | SLC39A8  |
| SP2 | SLF2     |
| SP2 | SMARCC2  |
| SP2 | SMC2     |
| SP2 | SMTN     |
| SP2 | SND1     |
| SP2 | SNTB2    |
| SP2 | SNX1     |
| SP2 | SP1      |
| SP2 | SP2      |
| SP2 | SPAG1    |
| SP2 | SPPL2A   |
| SP2 | SPSB1    |
| SP2 | SRPRA    |
| SP2 | STIM1    |
| SP2 | STT3A    |
| SP2 | SVIP     |
| SP2 | TCERG1   |
| SP2 | TDG      |
| SP2 | TM2D2    |
| SP2 | TM9SF1   |

|     |           |
|-----|-----------|
| SP2 | TM9SF3    |
| SP2 | TMEM106C  |
| SP2 | TMEM167B  |
| SP2 | TMEM251   |
| SP2 | TMEM39B   |
| SP2 | TMEM60    |
| SP2 | TNFAIP8L1 |
| SP2 | TOP2B     |
| SP2 | TRIM27    |
| SP2 | TRMT112   |
| SP2 | TSR2      |
| SP2 | TSTD2     |
| SP2 | TTK       |
| SP2 | TUBB2A    |
| SP2 | TUBB2B    |
| SP2 | TXLNA     |
| SP2 | UBE4A     |
| SP2 | UFSP2     |
| SP2 | UNC50     |
| SP2 | USB1      |
| SP2 | VPS45     |
| SP2 | VRK2      |
| SP2 | XIST      |
| SP2 | XRCC4     |
| SP2 | ZCCHC8    |
| SP2 | ZFAND3    |
| SP2 | ZNF397    |
| SP2 | ZNF680    |
| SP3 | AAAS      |
| SP3 | ABCA7     |
| SP3 | ABI2      |
| SP3 | ACADS     |
| SP3 | ACBD3     |
| SP3 | ACLY      |
| SP3 | ACSF2     |
| SP3 | ADAM15    |
| SP3 | ADAR      |
| SP3 | AMOTL1    |
| SP3 | ANAPC11   |
| SP3 | ANKRD34B  |
| SP3 | ANKRD54   |
| SP3 | ANXA4     |
| SP3 | AP1AR     |
| SP3 | AP2A1     |
| SP3 | APEX2     |
| SP3 | APOLD1    |
| SP3 | ARHGAP11A |
| SP3 | ARHGEF19  |
| SP3 | ARMC9     |
| SP3 | ARMCX5    |



|     |            |
|-----|------------|
| SP3 | ARRB2      |
| SP3 | ARRDC1     |
| SP3 | ASCC2      |
| SP3 | ATAD5      |
| SP3 | ATG4C      |
| SP3 | ATG4D      |
| SP3 | ATMIN      |
| SP3 | ATP11B     |
| SP3 | ATP2A3     |
| SP3 | ATXN2L     |
| SP3 | AVEN       |
| SP3 | B4GALT5    |
| SP3 | BCKDK      |
| SP3 | BRCA2      |
| SP3 | BRI3BP     |
| SP3 | BUB1B      |
| SP3 | BUD31      |
| SP3 | C17orf80   |
| SP3 | C2CD2L     |
| SP3 | C2orf49    |
| SP3 | C4orf33    |
| SP3 | C8orf76    |
| SP3 | CBR4       |
| SP3 | CCDC9      |
| SP3 | CCNF       |
| SP3 | CD24       |
| SP3 | CD37       |
| SP3 | CDADC1     |
| SP3 | CDC25A     |
| SP3 | CDC25B     |
| SP3 | CDK19      |
| SP3 | CDKN2AIPNL |
| SP3 | CENPJ      |
| SP3 | CEP55      |
| SP3 | CEP57L1    |
| SP3 | CGRRF1     |
| SP3 | CHDH       |
| SP3 | CHKA       |
| SP3 | CLSTN3     |
| SP3 | CNOT6      |
| SP3 | COQ10B     |
| SP3 | CRAT       |
| SP3 | CRLF3      |
| SP3 | CROT       |
| SP3 | CYB5B      |
| SP3 | CYB5R1     |
| SP3 | CYBA       |
| SP3 | DDA1       |
| SP3 | DEGS2      |
| SP3 | DENND1C    |

|     |          |
|-----|----------|
| SP3 | DGCR2    |
| SP3 | DIAPH3   |
| SP3 | DLAT     |
| SP3 | DNAJA2   |
| SP3 | DNAJC1   |
| SP3 | DNAJC21  |
| SP3 | DOCK11   |
| SP3 | DOK7     |
| SP3 | DUSP1    |
| SP3 | DYNLT1   |
| SP3 | E2F1     |
| SP3 | E2F8     |
| SP3 | E4F1     |
| SP3 | EFR3A    |
| SP3 | EIF2S3   |
| SP3 | ERLIN2   |
| SP3 | ERP29    |
| SP3 | EXOC2    |
| SP3 | FAM102A  |
| SP3 | FAM200B  |
| SP3 | FBXW9    |
| SP3 | FCHSD1   |
| SP3 | FIGNL1   |
| SP3 | FLAD1    |
| SP3 | FOXO3    |
| SP3 | FZD3     |
| SP3 | G6PC3    |
| SP3 | GALNT7   |
| SP3 | GCLC     |
| SP3 | GDE1     |
| SP3 | GFI1     |
| SP3 | GINS4    |
| SP3 | GLCCI1   |
| SP3 | GM2A     |
| SP3 | GNE      |
| SP3 | GOLGA1   |
| SP3 | GPCPD1   |
| SP3 | GPR65    |
| SP3 | GPR89A   |
| SP3 | GTF2IRD2 |
| SP3 | HCN3     |
| SP3 | HERC3    |
| SP3 | HIF1AN   |
| SP3 | HIGD2A   |
| SP3 | HIST1H1D |
| SP3 | HOPX     |
| SP3 | HSPB1    |
| SP3 | ICMT     |
| SP3 | IGF2BP1  |
| SP3 | IGSF8    |

|     |          |
|-----|----------|
| SP3 | IMPA2    |
| SP3 | INAFM1   |
| SP3 | IQCD     |
| SP3 | IQGAP1   |
| SP3 | IRF2BP1  |
| SP3 | ISCU     |
| SP3 | ITM2B    |
| SP3 | JAK1     |
| SP3 | JMJD1C   |
| SP3 | KATNAL1  |
| SP3 | KBTBD3   |
| SP3 | KDM2B    |
| SP3 | KIAA0040 |
| SP3 | KLF3     |
| SP3 | KLHL42   |
| SP3 | KMT2E    |
| SP3 | KRBOX4   |
| SP3 | LIG1     |
| SP3 | LIN54    |
| SP3 | LIX1L    |
| SP3 | LMNB2    |
| SP3 | LNX2     |
| SP3 | LPCAT3   |
| SP3 | LRRC37A2 |
| SP3 | LRRC8D   |
| SP3 | LTC4S    |
| SP3 | MAGEH1   |
| SP3 | MARK3    |
| SP3 | MDC1     |
| SP3 | MEPCE    |
| SP3 | MFSD3    |
| SP3 | MGA      |
| SP3 | MGARP    |
| SP3 | MICB     |
| SP3 | MIOS     |
| SP3 | MIXL1    |
| SP3 | MLXIP    |
| SP3 | MME      |
| SP3 | MOGS     |
| SP3 | MORC2    |
| SP3 | MORC4    |
| SP3 | MRPL28   |
| SP3 | MRPS6    |
| SP3 | MYO7B    |
| SP3 | NAA40    |
| SP3 | NCKIPSD  |
| SP3 | NCOA6    |
| SP3 | NDUFAF6  |
| SP3 | NDUFS2   |
| SP3 | NECAB3   |

|     |          |
|-----|----------|
| SP3 | NEIL3    |
| SP3 | NF1      |
| SP3 | NFXL1    |
| SP3 | NFYA     |
| SP3 | NKIRAS1  |
| SP3 | NME7     |
| SP3 | NPHP3    |
| SP3 | NPRL3    |
| SP3 | NRDC     |
| SP3 | NUMB     |
| SP3 | NUS1     |
| SP3 | OPA1     |
| SP3 | ORAI2    |
| SP3 | ORMDL2   |
| SP3 | OSBPL9   |
| SP3 | OTUD5    |
| SP3 | PAIP2B   |
| SP3 | PAQR4    |
| SP3 | PARD6A   |
| SP3 | PCNT     |
| SP3 | PDE4DIP  |
| SP3 | PEX11A   |
| SP3 | PGM2     |
| SP3 | PIF1     |
| SP3 | PLD3     |
| SP3 | PLEKHA3  |
| SP3 | PLEKHH3  |
| SP3 | POFUT1   |
| SP3 | POGLUT1  |
| SP3 | POLR3D   |
| SP3 | POLRMT   |
| SP3 | PPP1R12B |
| SP3 | PRADC1   |
| SP3 | PRKACA   |
| SP3 | PRKACB   |
| SP3 | PSMC3    |
| SP3 | PTCD2    |
| SP3 | PTGIR    |
| SP3 | PUS7L    |
| SP3 | PWWP2A   |
| SP3 | QRICH1   |
| SP3 | QTRT2    |
| SP3 | RAB22A   |
| SP3 | RAB3GAP1 |
| SP3 | RAB5C    |
| SP3 | RALGPS1  |
| SP3 | RASA1    |
| SP3 | RASGRP2  |
| SP3 | RBM6     |
| SP3 | RBSN     |

|     |          |
|-----|----------|
| SP3 | RC3H1    |
| SP3 | REPS1    |
| SP3 | RERE     |
| SP3 | REST     |
| SP3 | REV3L    |
| SP3 | RGS16    |
| SP3 | RHBDD2   |
| SP3 | RNF168   |
| SP3 | RNF2     |
| SP3 | RNPEPL1  |
| SP3 | ROCK2    |
| SP3 | RPS6KB2  |
| SP3 | RSPH1    |
| SP3 | SAC3D1   |
| SP3 | SCAF4    |
| SP3 | SCPEP1   |
| SP3 | SDCCAG8  |
| SP3 | SDHAF1   |
| SP3 | SEC13    |
| SP3 | SEC22B   |
| SP3 | SETD3    |
| SP3 | SETD6    |
| SP3 | SFT2D2   |
| SP3 | SGMS1    |
| SP3 | SH3D21   |
| SP3 | SHARPIN  |
| SP3 | SHF      |
| SP3 | SHISA8   |
| SP3 | SHOC2    |
| SP3 | SIN3B    |
| SP3 | SIT1     |
| SP3 | SLC19A1  |
| SP3 | SLC25A33 |
| SP3 | SLC25A40 |
| SP3 | SLK      |
| SP3 | SLMAP    |
| SP3 | SMARCAD1 |
| SP3 | SMARCB1  |
| SP3 | SMARCD2  |
| SP3 | SMC3     |
| SP3 | SMCHD1   |
| SP3 | SP3      |
| SP3 | SPON2    |
| SP3 | SPSB2    |
| SP3 | STAG2    |
| SP3 | STX5     |
| SP3 | SUDS3    |
| SP3 | SUN1     |
| SP3 | SUN2     |
| SP3 | SUPT20H  |

|     |          |
|-----|----------|
| SP3 | SVIP     |
| SP3 | SYNGR1   |
| SP3 | TAF3     |
| SP3 | TAOK1    |
| SP3 | TARBP2   |
| SP3 | TARSL2   |
| SP3 | TCF25    |
| SP3 | TFDP2    |
| SP3 | TGOLN2   |
| SP3 | TM7SF2   |
| SP3 | TM7SF3   |
| SP3 | TMEM143  |
| SP3 | TMEM231  |
| SP3 | TMP0-AS1 |
| SP3 | TMX2     |
| SP3 | TNFRSF1B |
| SP3 | TNRC6B   |
| SP3 | TP53TG1  |
| SP3 | TPRG1L   |
| SP3 | TRAPPC6A |
| SP3 | TRIM5    |
| SP3 | TRPM7    |
| SP3 | TSC22D1  |
| SP3 | TSPAN13  |
| SP3 | TSPAN5   |
| SP3 | TTC14    |
| SP3 | TTK      |
| SP3 | TTLL3    |
| SP3 | TWF1     |
| SP3 | TYSND1   |
| SP3 | UBASH3B  |
| SP3 | UBR2     |
| SP3 | UNC45A   |
| SP3 | USP11    |
| SP3 | USP33    |
| SP3 | UTRN     |
| SP3 | VAMP1    |
| SP3 | VPS33B   |
| SP3 | WDR82    |
| SP3 | WSB2     |
| SP3 | XP01     |
| SP3 | XRCC3    |
| SP3 | XXYLT1   |
| SP3 | YTHDF2   |
| SP3 | ZBTB24   |
| SP3 | ZFAND5   |
| SP3 | ZFC3H1   |
| SP3 | ZFHX3    |
| SP3 | ZFP91    |
| SP3 | ZFPL1    |

|      |         |
|------|---------|
| SP3  | ZFX     |
| SP3  | ZFYVE21 |
| SP3  | ZNF248  |
| SP3  | ZNF276  |
| SP3  | ZNF281  |
| SP3  | ZNF429  |
| SP3  | ZNF487  |
| SP3  | ZNF506  |
| SP3  | ZNF563  |
| SP3  | ZNF566  |
| SP3  | ZNF598  |
| SP3  | ZNF765  |
| SP3  | ZNF800  |
| SP3  | ZNF804A |
| SP3  | ZNF83   |
| SP3  | ZNRF1   |
| SP4  | ACLY    |
| SP4  | AFF2    |
| SP4  | AK4     |
| SP4  | BMPR1A  |
| SP4  | CACNA1A |
| SP4  | CEP57L1 |
| SP4  | FAM110A |
| SP4  | GTF2A1  |
| SP4  | KANSL1  |
| SP4  | LONRF1  |
| SP4  | NR4A2   |
| SP4  | SP4     |
| SP4  | SPRY1   |
| SP4  | WASL    |
| SPI1 | ABCB7   |
| SPI1 | ABHD13  |
| SPI1 | ABI1    |
| SPI1 | ABI2    |
| SPI1 | ABI3    |
| SPI1 | ABTB1   |
| SPI1 | ACAA2   |
| SPI1 | ACAP1   |
| SPI1 | ACAP2   |
| SPI1 | ACBD3   |
| SPI1 | ACIN1   |
| SPI1 | ACLY    |
| SPI1 | ACOT8   |
| SPI1 | ACP5    |
| SPI1 | ACSF3   |
| SPI1 | ACSL5   |
| SPI1 | ACTB    |
| SPI1 | ACTG1   |
| SPI1 | ACTR1A  |
| SPI1 | ACTR2   |

|      |          |
|------|----------|
| SPI1 | ACTR3    |
| SPI1 | ACYP2    |
| SPI1 | ADA      |
| SPI1 | ADAM8    |
| SPI1 | ADAR     |
| SPI1 | ADH5     |
| SPI1 | ADPRHL2  |
| SPI1 | AFF3     |
| SPI1 | AFF4     |
| SPI1 | AFTPH    |
| SPI1 | AGFG1    |
| SPI1 | AG01     |
| SPI1 | AHNAK    |
| SPI1 | AIF1     |
| SPI1 | AIFM1    |
| SPI1 | AIM2     |
| SPI1 | AIP      |
| SPI1 | AKAP11   |
| SPI1 | AKAP13   |
| SPI1 | AKIRIN1  |
| SPI1 | AKIRIN2  |
| SPI1 | AKNA     |
| SPI1 | ALAS1    |
| SPI1 | ALDH2    |
| SPI1 | ALDOA    |
| SPI1 | ALKBH5   |
| SPI1 | ALOX5    |
| SPI1 | ALOX5AP  |
| SPI1 | ALPK1    |
| SPI1 | AMPD2    |
| SPI1 | ANAPC15  |
| SPI1 | ANAPC16  |
| SPI1 | ANAPC4   |
| SPI1 | ANKRA2   |
| SPI1 | ANKRD13A |
| SPI1 | ANKRD17  |
| SPI1 | ANKRD44  |
| SPI1 | ANP32B   |
| SPI1 | ANXA11   |
| SPI1 | ANXA4    |
| SPI1 | ANXA6    |
| SPI1 | AP1G2    |
| SPI1 | AP1M1    |
| SPI1 | AP1S2    |
| SPI1 | AP2B1    |
| SPI1 | AP2M1    |
| SPI1 | AP2S1    |
| SPI1 | AP3S1    |
| SPI1 | AP3S2    |
| SPI1 | AP5M1    |



|      |           |
|------|-----------|
| SPI1 | APAF1     |
| SPI1 | APBB1     |
| SPI1 | APBB1IP   |
| SPI1 | APEX2     |
| SPI1 | APOBEC3C  |
| SPI1 | APOLD1    |
| SPI1 | APOM      |
| SPI1 | ARF1      |
| SPI1 | ARF3      |
| SPI1 | ARF5      |
| SPI1 | ARF6      |
| SPI1 | ARFGEF1   |
| SPI1 | ARHGAP1   |
| SPI1 | ARHGAP11A |
| SPI1 | ARHGAP15  |
| SPI1 | ARHGAP25  |
| SPI1 | ARHGAP30  |
| SPI1 | ARHGAP4   |
| SPI1 | ARHGAP9   |
| SPI1 | ARHGDIA   |
| SPI1 | ARHGDIB   |
| SPI1 | ARHGEF1   |
| SPI1 | ARHGEF2   |
| SPI1 | ARHGEF3   |
| SPI1 | ARHGEF7   |
| SPI1 | ARID1B    |
| SPI1 | ARID4A    |
| SPI1 | ARID4B    |
| SPI1 | ARL5A     |
| SPI1 | ARL6IP5   |
| SPI1 | ARL6IP6   |
| SPI1 | ARMCX6    |
| SPI1 | ARMT1     |
| SPI1 | ARPC1A    |
| SPI1 | ARPC1B    |
| SPI1 | ARPC2     |
| SPI1 | ARPC3     |
| SPI1 | ARPC4     |
| SPI1 | ARRB2     |
| SPI1 | ARV1      |
| SPI1 | ASAP1     |
| SPI1 | ASB1      |
| SPI1 | ASB2      |
| SPI1 | ASB8      |
| SPI1 | ASCC1     |
| SPI1 | ASNA1     |
| SPI1 | ASPH      |
| SPI1 | ATAD1     |
| SPI1 | ATF4      |
| SPI1 | ATF6B     |

|      |          |
|------|----------|
| SPI1 | ATF7     |
| SPI1 | ATF7IP   |
| SPI1 | ATF7IP2  |
| SPI1 | ATG12    |
| SPI1 | ATG2B    |
| SPI1 | ATG3     |
| SPI1 | ATM      |
| SPI1 | ATP23    |
| SPI1 | ATP6V0D1 |
| SPI1 | ATP6V0E1 |
| SPI1 | ATP6V1A  |
| SPI1 | ATP6V1D  |
| SPI1 | ATP6V1E1 |
| SPI1 | ATP6V1H  |
| SPI1 | ATXN10   |
| SPI1 | ATXN7L3  |
| SPI1 | AURKAIP1 |
| SPI1 | B9D2     |
| SPI1 | BABAM1   |
| SPI1 | BACH2    |
| SPI1 | BAG6     |
| SPI1 | BAK1     |
| SPI1 | BANP     |
| SPI1 | BASP1    |
| SPI1 | BBX      |
| SPI1 | BCAR3    |
| SPI1 | BCDIN3D  |
| SPI1 | BCKDHB   |
| SPI1 | BCL11A   |
| SPI1 | BCL7C    |
| SPI1 | BCOR     |
| SPI1 | BDP1     |
| SPI1 | BECN1    |
| SPI1 | BIK      |
| SPI1 | BIN1     |
| SPI1 | BIRC3    |
| SPI1 | BLCAP    |
| SPI1 | BLK      |
| SPI1 | BLNK     |
| SPI1 | BLOC1S2  |
| SPI1 | BLOC1S4  |
| SPI1 | BLOC1S6  |
| SPI1 | BNIP2    |
| SPI1 | BNIP3L   |
| SPI1 | BOD1L1   |
| SPI1 | BORCS5   |
| SPI1 | BORCS6   |
| SPI1 | BORCS8   |
| SPI1 | BPTF     |
| SPI1 | BRD7     |

|      |           |
|------|-----------|
| SPI1 | BRF2      |
| SPI1 | BRK1      |
| SPI1 | BRMS1     |
| SPI1 | BROX      |
| SPI1 | BTF3      |
| SPI1 | BTG1      |
| SPI1 | BTK       |
| SPI1 | BTLA      |
| SPI1 | BTNL9     |
| SPI1 | C11orf24  |
| SPI1 | C12orf10  |
| SPI1 | C12orf49  |
| SPI1 | C12orf75  |
| SPI1 | C14orf119 |
| SPI1 | C15orf62  |
| SPI1 | C16orf58  |
| SPI1 | C16orf72  |
| SPI1 | C16orf74  |
| SPI1 | C18orf54  |
| SPI1 | C19orf25  |
| SPI1 | C19orf38  |
| SPI1 | C1orf131  |
| SPI1 | C2orf42   |
| SPI1 | C2orf49   |
| SPI1 | C2orf68   |
| SPI1 | C2orf76   |
| SPI1 | C3orf38   |
| SPI1 | C4orf46   |
| SPI1 | C5orf24   |
| SPI1 | C6orf226  |
| SPI1 | C7orf50   |
| SPI1 | C9orf78   |
| SPI1 | CA11      |
| SPI1 | CAAP1     |
| SPI1 | CABIN1    |
| SPI1 | CACNA1A   |
| SPI1 | CADPS     |
| SPI1 | CALM2     |
| SPI1 | CAMK2G    |
| SPI1 | CAMK4     |
| SPI1 | CAP1      |
| SPI1 | CAPG      |
| SPI1 | CAPN1     |
| SPI1 | CAPZA1    |
| SPI1 | CAPZA2    |
| SPI1 | CAPZB     |
| SPI1 | CARD8     |
| SPI1 | CARHSP1   |
| SPI1 | CARNMT1   |
| SPI1 | CASP4     |

|      |          |
|------|----------|
| SPI1 | CAST     |
| SPI1 | CASZ1    |
| SPI1 | CBFA2T2  |
| SPI1 | CBFA2T3  |
| SPI1 | CBL      |
| SPI1 | CBX3     |
| SPI1 | CCDC115  |
| SPI1 | CCDC12   |
| SPI1 | CCDC125  |
| SPI1 | CCDC126  |
| SPI1 | CCDC174  |
| SPI1 | CCDC51   |
| SPI1 | CCDC69   |
| SPI1 | CCDC71   |
| SPI1 | CCDC88C  |
| SPI1 | CCDC90B  |
| SPI1 | CCM2     |
| SPI1 | CCNB1IP1 |
| SPI1 | CCND3    |
| SPI1 | CCNDBP1  |
| SPI1 | CCNG1    |
| SPI1 | CCNG2    |
| SPI1 | CCNH     |
| SPI1 | CCNI     |
| SPI1 | CCNK     |
| SPI1 | CCP110   |
| SPI1 | CCR6     |
| SPI1 | CCZ1     |
| SPI1 | CD180    |
| SPI1 | CD19     |
| SPI1 | CD22     |
| SPI1 | CD37     |
| SPI1 | CD40     |
| SPI1 | CD52     |
| SPI1 | CD53     |
| SPI1 | CD72     |
| SPI1 | CD74     |
| SPI1 | CD79A    |
| SPI1 | CD79B    |
| SPI1 | CDC123   |
| SPI1 | CDC16    |
| SPI1 | CDC25B   |
| SPI1 | CDC27    |
| SPI1 | CDC34    |
| SPI1 | CDC37    |
| SPI1 | CDC40    |
| SPI1 | CDC42    |
| SPI1 | CDC42EP3 |
| SPI1 | CDK14    |
| SPI1 | CDK19    |

|      |          |
|------|----------|
| SPI1 | CDK2AP2  |
| SPI1 | CDK5RAP1 |
| SPI1 | CDK5RAP3 |
| SPI1 | CDK7     |
| SPI1 | CDKN2A   |
| SPI1 | CDV3     |
| SPI1 | CEBPD    |
| SPI1 | CEBPZOS  |
| SPI1 | CELF1    |
| SPI1 | CENPL    |
| SPI1 | CEP135   |
| SPI1 | CEP295   |
| SPI1 | CEPT1    |
| SPI1 | CETN3    |
| SPI1 | CFAP20   |
| SPI1 | CFL1     |
| SPI1 | CFL2     |
| SPI1 | CGGBP1   |
| SPI1 | CHCHD5   |
| SPI1 | CHIC2    |
| SPI1 | CHKB     |
| SPI1 | CHM      |
| SPI1 | CHMP1A   |
| SPI1 | CHMP1B   |
| SPI1 | CHMP2A   |
| SPI1 | CHMP4B   |
| SPI1 | CHMP5    |
| SPI1 | CHRNB1   |
| SPI1 | CHST10   |
| SPI1 | CHTF8    |
| SPI1 | CHUK     |
| SPI1 | CHURC1   |
| SPI1 | CIB1     |
| SPI1 | CIITA    |
| SPI1 | CIRBP    |
| SPI1 | CLASRP   |
| SPI1 | CLIC1    |
| SPI1 | CLIC4    |
| SPI1 | CLIP2    |
| SPI1 | CLK2     |
| SPI1 | CLK3     |
| SPI1 | CLOCK    |
| SPI1 | CLSTN3   |
| SPI1 | CLTA     |
| SPI1 | CLTB     |
| SPI1 | CLTC     |
| SPI1 | CMAS     |
| SPI1 | CMIP     |
| SPI1 | CMTM6    |
| SPI1 | CMTM7    |

|      |         |
|------|---------|
| SPI1 | CNDP2   |
| SPI1 | CNIH1   |
| SPI1 | CNN2    |
| SPI1 | CNOT10  |
| SPI1 | CNOT2   |
| SPI1 | CNOT3   |
| SPI1 | CNOT7   |
| SPI1 | CNOT8   |
| SPI1 | CNPPD1  |
| SPI1 | COA4    |
| SPI1 | COBLL1  |
| SPI1 | COG4    |
| SPI1 | COMMD2  |
| SPI1 | COMMD4  |
| SPI1 | COMMD5  |
| SPI1 | COMMD6  |
| SPI1 | COPA    |
| SPI1 | COPE    |
| SPI1 | COPG2   |
| SPI1 | COPS5   |
| SPI1 | COQ6    |
| SPI1 | COQ9    |
| SPI1 | COR01A  |
| SPI1 | COR01B  |
| SPI1 | COX14   |
| SPI1 | COX16   |
| SPI1 | COX17   |
| SPI1 | COX4I1  |
| SPI1 | COX5B   |
| SPI1 | COX6A1  |
| SPI1 | COX6B1  |
| SPI1 | COX7A2L |
| SPI1 | COX7C   |
| SPI1 | COX8A   |
| SPI1 | CPNE1   |
| SPI1 | CPNE3   |
| SPI1 | CPNE5   |
| SPI1 | CPSF2   |
| SPI1 | CPSF7   |
| SPI1 | CPT2    |
| SPI1 | CREB1   |
| SPI1 | CREBRF  |
| SPI1 | CREBZF  |
| SPI1 | CRK     |
| SPI1 | CRLF3   |
| SPI1 | CRYZL1  |
| SPI1 | CS      |
| SPI1 | CSF2RB  |
| SPI1 | CSK     |
| SPI1 | CSNK1A1 |

|      |          |
|------|----------|
| SPI1 | CSNK1D   |
| SPI1 | CSNK1G1  |
| SPI1 | CSNK1G2  |
| SPI1 | CSTF1    |
| SPI1 | CSTF2    |
| SPI1 | CTDNEP1  |
| SPI1 | CTDP1    |
| SPI1 | CTDSP1   |
| SPI1 | CTDSP2   |
| SPI1 | CTDSPL2  |
| SPI1 | CTNNA1   |
| SPI1 | CTNBL1   |
| SPI1 | CTSB     |
| SPI1 | CTSZ     |
| SPI1 | CUEDC2   |
| SPI1 | CUL3     |
| SPI1 | CUL4B    |
| SPI1 | CUTC     |
| SPI1 | CXCR5    |
| SPI1 | CXorf38  |
| SPI1 | CXXC1    |
| SPI1 | CXXC5    |
| SPI1 | CYB561A3 |
| SPI1 | CYB561D2 |
| SPI1 | CYB5B    |
| SPI1 | CYB5R3   |
| SPI1 | CYB5R4   |
| SPI1 | CYBA     |
| SPI1 | CYBB     |
| SPI1 | CYFIP2   |
| SPI1 | CYSTM1   |
| SPI1 | CYTIP    |
| SPI1 | DAAM1    |
| SPI1 | DAP      |
| SPI1 | DAPK3    |
| SPI1 | DAPP1    |
| SPI1 | DAXX     |
| SPI1 | DAZAP1   |
| SPI1 | DAZAP2   |
| SPI1 | DBNL     |
| SPI1 | DCAF11   |
| SPI1 | DCAF12   |
| SPI1 | DCAF16   |
| SPI1 | DCAF5    |
| SPI1 | DCAF6    |
| SPI1 | DCAF7    |
| SPI1 | DCK      |
| SPI1 | DCLRE1C  |
| SPI1 | DCP1B    |
| SPI1 | DCTN3    |

|      |            |
|------|------------|
| SPI1 | DCTN5      |
| SPI1 | DCUN1D1    |
| SPI1 | DDA1       |
| SPI1 | DDAH2      |
| SPI1 | DDIAS      |
| SPI1 | DDX19B     |
| SPI1 | DDX27      |
| SPI1 | DDX3X      |
| SPI1 | DDX42      |
| SPI1 | DDX5       |
| SPI1 | DDX6       |
| SPI1 | DEF8       |
| SPI1 | DENND1B    |
| SPI1 | DENND1C    |
| SPI1 | DENND2D    |
| SPI1 | DENND4B    |
| SPI1 | DENR       |
| SPI1 | DEPDC5     |
| SPI1 | DFFA       |
| SPI1 | DGKZ       |
| SPI1 | DGU0K      |
| SPI1 | DHPS       |
| SPI1 | DHRS4L2    |
| SPI1 | DHRS7      |
| SPI1 | DHRS7B     |
| SPI1 | DIAPH1     |
| SPI1 | DICER1     |
| SPI1 | DIS3       |
| SPI1 | DLAT       |
| SPI1 | DLD        |
| SPI1 | DLEU2      |
| SPI1 | DLGAP1-AS1 |
| SPI1 | DMAP1      |
| SPI1 | DNAJB6     |
| SPI1 | DNAJC4     |
| SPI1 | DNAJC5     |
| SPI1 | DNAJC7     |
| SPI1 | DNAL4      |
| SPI1 | DNM2       |
| SPI1 | DNMT1      |
| SPI1 | DOCK8      |
| SPI1 | DOCK9      |
| SPI1 | DOK1       |
| SPI1 | DPM1       |
| SPI1 | DPP3       |
| SPI1 | DPP8       |
| SPI1 | DPYSL2     |
| SPI1 | DR1        |
| SPI1 | DSTYK      |
| SPI1 | DTNBP1     |



|      |          |
|------|----------|
| SPI1 | DUSP28   |
| SPI1 | DUSP6    |
| SPI1 | DYNC1I2  |
| SPI1 | DYNC1LI1 |
| SPI1 | DYNLL1   |
| SPI1 | DYNLRB1  |
| SPI1 | DYNLT1   |
| SPI1 | DZIP3    |
| SPI1 | E2F5     |
| SPI1 | EAPP     |
| SPI1 | EBAG9    |
| SPI1 | EBF1     |
| SPI1 | ECH1     |
| SPI1 | EEF1B2   |
| SPI1 | EEF1G    |
| SPI1 | EEDP1    |
| SPI1 | EFNA4    |
| SPI1 | EGLN1    |
| SPI1 | EGR1     |
| SPI1 | EHD1     |
| SPI1 | EIF1B    |
| SPI1 | EIF2A    |
| SPI1 | EIF2AK1  |
| SPI1 | EIF2B1   |
| SPI1 | EIF2B2   |
| SPI1 | EIF2S3   |
| SPI1 | EIF3D    |
| SPI1 | EIF3F    |
| SPI1 | EIF3G    |
| SPI1 | EIF3H    |
| SPI1 | EIF3I    |
| SPI1 | EIF3K    |
| SPI1 | EIF3L    |
| SPI1 | EIF3M    |
| SPI1 | EIF4E2   |
| SPI1 | EIF4G2   |
| SPI1 | EIF4G3   |
| SPI1 | EIF4H    |
| SPI1 | EIF5A    |
| SPI1 | ELAC2    |
| SPI1 | ELF1     |
| SPI1 | ELF2     |
| SPI1 | ELK3     |
| SPI1 | ELM01    |
| SPI1 | ELMSAN1  |
| SPI1 | ELOF1    |
| SPI1 | ELOVL1   |
| SPI1 | ELOVL5   |
| SPI1 | ELP3     |
| SPI1 | EMP3     |

|      |              |
|------|--------------|
| SPI1 | ENTPD1-AS1   |
| SPI1 | EP300        |
| SPI1 | EPB41        |
| SPI1 | EPB41L4A-AS1 |
| SPI1 | EPC1         |
| SPI1 | EPN1         |
| SPI1 | EPS15        |
| SPI1 | ERBIN        |
| SPI1 | ERCC3        |
| SPI1 | ERCC4        |
| SPI1 | ERGIC1       |
| SPI1 | ERGIC3       |
| SPI1 | ERICH1       |
| SPI1 | ESD          |
| SPI1 | ETFB         |
| SPI1 | ETS1         |
| SPI1 | ETV2         |
| SPI1 | EVI2A        |
| SPI1 | EVI2B        |
| SPI1 | EXOC1        |
| SPI1 | EXOC3        |
| SPI1 | EXOC3-AS1    |
| SPI1 | EXOC4        |
| SPI1 | EXOC7        |
| SPI1 | EXT1         |
| SPI1 | EYA2         |
| SPI1 | FAAP20       |
| SPI1 | FADS3        |
| SPI1 | FAF2         |
| SPI1 | FAM102A      |
| SPI1 | FAM107B      |
| SPI1 | FAM110A      |
| SPI1 | FAM120B      |
| SPI1 | FAM122A      |
| SPI1 | FAM129A      |
| SPI1 | FAM129C      |
| SPI1 | FAM13B       |
| SPI1 | FAM173A      |
| SPI1 | FAM192A      |
| SPI1 | FAM193B      |
| SPI1 | FAM214A      |
| SPI1 | FAM32A       |
| SPI1 | FAM49A       |
| SPI1 | FAM49B       |
| SPI1 | FAM50B       |
| SPI1 | FAM53B       |
| SPI1 | FAM76B       |
| SPI1 | FAM81A       |
| SPI1 | FAM91A1      |
| SPI1 | FAM96A       |

|      |           |
|------|-----------|
| SPI1 | FAM96B    |
| SPI1 | FASTKD5   |
| SPI1 | FAU       |
| SPI1 | FBRS      |
| SPI1 | FBXL20    |
| SPI1 | FBX011    |
| SPI1 | FBX022    |
| SPI1 | FBX025    |
| SPI1 | FBX03     |
| SPI1 | FBX042    |
| SPI1 | FBXW2     |
| SPI1 | FBXW5     |
| SPI1 | FBXW9     |
| SPI1 | FCGR2B    |
| SPI1 | FCHSD2    |
| SPI1 | FCMR      |
| SPI1 | FCRL1     |
| SPI1 | FCRLA     |
| SPI1 | FDFT1     |
| SPI1 | FDPS      |
| SPI1 | FERMT3    |
| SPI1 | FES       |
| SPI1 | FEZ2      |
| SPI1 | FFAR1     |
| SPI1 | FGD2      |
| SPI1 | FIBP      |
| SPI1 | FIG4      |
| SPI1 | FKBP1A    |
| SPI1 | FKBP8     |
| SPI1 | FLAD1     |
| SPI1 | FLI1      |
| SPI1 | FLNA      |
| SPI1 | FLOT1     |
| SPI1 | FMNL1     |
| SPI1 | FMNL3     |
| SPI1 | FNTA      |
| SPI1 | FOXN2     |
| SPI1 | FOXO1     |
| SPI1 | FPGS      |
| SPI1 | FSIP1     |
| SPI1 | FUCA1     |
| SPI1 | G2E3      |
| SPI1 | G6PD      |
| SPI1 | GABARAP   |
| SPI1 | GABARAPL2 |
| SPI1 | GAK       |
| SPI1 | GAPDH     |
| SPI1 | GATAD2B   |
| SPI1 | GBE1      |
| SPI1 | GDI2      |

|      |          |
|------|----------|
| SPI1 | GDPD5    |
| SPI1 | GEMIN7   |
| SPI1 | GGA2     |
| SPI1 | GGNBP2   |
| SPI1 | GIN1     |
| SPI1 | GIT2     |
| SPI1 | GLB1     |
| SPI1 | GLE1     |
| SPI1 | GLIPR1   |
| SPI1 | GLMP     |
| SPI1 | GLRX5    |
| SPI1 | GLTP     |
| SPI1 | GLYCTK   |
| SPI1 | GMEB1    |
| SPI1 | GMFG     |
| SPI1 | GMPR2    |
| SPI1 | GNA13    |
| SPI1 | GNAI2    |
| SPI1 | GNAI3    |
| SPI1 | GNAS     |
| SPI1 | GNB1L    |
| SPI1 | GNB2     |
| SPI1 | GNB4     |
| SPI1 | GNGT2    |
| SPI1 | GNPAT    |
| SPI1 | GON4L    |
| SPI1 | GOPC     |
| SPI1 | GPATCH2  |
| SPI1 | GPATCH2L |
| SPI1 | GPATCH8  |
| SPI1 | GPBP1    |
| SPI1 | GPM6B    |
| SPI1 | GPR108   |
| SPI1 | GPR160   |
| SPI1 | GPR18    |
| SPI1 | GPR183   |
| SPI1 | GPSM3    |
| SPI1 | GRAMD1A  |
| SPI1 | GRAP     |
| SPI1 | GRB2     |
| SPI1 | GRIPAP1  |
| SPI1 | GRK2     |
| SPI1 | GRK6     |
| SPI1 | GRN      |
| SPI1 | GSDMD    |
| SPI1 | GSK3B    |
| SPI1 | GSKIP    |
| SPI1 | GSN      |
| SPI1 | GSPT2    |
| SPI1 | GSTO1    |

|      |           |
|------|-----------|
| SPI1 | GTF2F1    |
| SPI1 | GTF2F2    |
| SPI1 | GTF2I     |
| SPI1 | GTF3C2    |
| SPI1 | GTPBP8    |
| SPI1 | GTSE1     |
| SPI1 | GUCD1     |
| SPI1 | GYPC      |
| SPI1 | HAGHL     |
| SPI1 | HARS      |
| SPI1 | HAT1      |
| SPI1 | HAUS6     |
| SPI1 | HAUS8     |
| SPI1 | HBP1      |
| SPI1 | HCFC1     |
| SPI1 | HCLS1     |
| SPI1 | HDAC7     |
| SPI1 | HDHD2     |
| SPI1 | HECA      |
| SPI1 | HECTD1    |
| SPI1 | HECTD4    |
| SPI1 | HELQ      |
| SPI1 | HERC1     |
| SPI1 | HERC4     |
| SPI1 | HERPUD2   |
| SPI1 | HGS       |
| SPI1 | HHEX      |
| SPI1 | HIF1AN    |
| SPI1 | HIGD1A    |
| SPI1 | HIGD2A    |
| SPI1 | HINT1     |
| SPI1 | HIP1R     |
| SPI1 | HIPK3     |
| SPI1 | HK1       |
| SPI1 | HLA-DMB   |
| SPI1 | HLA-DOA   |
| SPI1 | HLA-DRB5  |
| SPI1 | HLA-F     |
| SPI1 | HMGA1     |
| SPI1 | HMGB1     |
| SPI1 | HMGCS1    |
| SPI1 | HMGN1     |
| SPI1 | HMGN2     |
| SPI1 | HMGXB3    |
| SPI1 | HNRNPA2B1 |
| SPI1 | HNRNPC    |
| SPI1 | HNRNPD    |
| SPI1 | HNRNPH2   |
| SPI1 | HNRNPK    |
| SPI1 | HNRNPU    |

|      |          |
|------|----------|
| SPI1 | HNRNPUL1 |
| SPI1 | HOXB4    |
| SPI1 | HPS1     |
| SPI1 | HPS3     |
| SPI1 | HPS6     |
| SPI1 | HRK      |
| SPI1 | HSBP1    |
| SPI1 | HSD17B11 |
| SPI1 | HSP90AB1 |
| SPI1 | HSPA4    |
| SPI1 | HTR3A    |
| SPI1 | HVCN1    |
| SPI1 | IDH3B    |
| SPI1 | IDI1     |
| SPI1 | IER2     |
| SPI1 | IFI16    |
| SPI1 | IFI30    |
| SPI1 | IFITM2   |
| SPI1 | IFT20    |
| SPI1 | IFT22    |
| SPI1 | IFT43    |
| SPI1 | IFT74    |
| SPI1 | IFT81    |
| SPI1 | IGBP1    |
| SPI1 | IKBKG    |
| SPI1 | IKZF1    |
| SPI1 | IKZF2    |
| SPI1 | IKZF3    |
| SPI1 | IL10RA   |
| SPI1 | IL13RA1  |
| SPI1 | IL16     |
| SPI1 | IL2RG    |
| SPI1 | IL4R     |
| SPI1 | ILK      |
| SPI1 | ING4     |
| SPI1 | INIP     |
| SPI1 | IN080C   |
| SPI1 | IN080D   |
| SPI1 | IN080E   |
| SPI1 | INPP5D   |
| SPI1 | INPP5K   |
| SPI1 | INTS2    |
| SPI1 | INTS4    |
| SPI1 | IQGAP1   |
| SPI1 | IRF2     |
| SPI1 | IRS1     |
| SPI1 | ISG20    |
| SPI1 | ISG20L2  |
| SPI1 | IST1     |
| SPI1 | ISY1     |

|      |           |
|------|-----------|
| SPI1 | ITGAE     |
| SPI1 | ITGAL     |
| SPI1 | ITGB1     |
| SPI1 | ITGB1BP1  |
| SPI1 | ITGB2     |
| SPI1 | ITGB7     |
| SPI1 | ITPA      |
| SPI1 | ITPR1     |
| SPI1 | ITPR2     |
| SPI1 | ITPRIP    |
| SPI1 | ITSN2     |
| SPI1 | JAK1      |
| SPI1 | JAK2      |
| SPI1 | JMJD1C    |
| SPI1 | JOSD2     |
| SPI1 | JUP       |
| SPI1 | KANK2     |
| SPI1 | KANSL1    |
| SPI1 | KANSL3    |
| SPI1 | KARS      |
| SPI1 | KAT5      |
| SPI1 | KAT8      |
| SPI1 | KBTBD4    |
| SPI1 | KCNN4     |
| SPI1 | KCTD18    |
| SPI1 | KCTD5     |
| SPI1 | KDM2A     |
| SPI1 | KDM2B     |
| SPI1 | KDM3B     |
| SPI1 | KDM5A     |
| SPI1 | KHDRBS1   |
| SPI1 | KHNYN     |
| SPI1 | KIAA0100  |
| SPI1 | KIAA0355  |
| SPI1 | KIAA2013  |
| SPI1 | KIDINS220 |
| SPI1 | KIF20B    |
| SPI1 | KIF23     |
| SPI1 | KIF2A     |
| SPI1 | KIF5B     |
| SPI1 | KIF9      |
| SPI1 | KLF12     |
| SPI1 | KLF6      |
| SPI1 | KLHDC2    |
| SPI1 | KLHL18    |
| SPI1 | KLHL20    |
| SPI1 | KLHL5     |
| SPI1 | KLHL6     |
| SPI1 | KLRG1     |
| SPI1 | KMT2C     |

|      |           |
|------|-----------|
| SPI1 | KMT2E     |
| SPI1 | KMT5A     |
| SPI1 | KRCC1     |
| SPI1 | KRIT1     |
| SPI1 | KRR1      |
| SPI1 | LACTB2    |
| SPI1 | LAMTOR1   |
| SPI1 | LAMTOR2   |
| SPI1 | LAMTOR4   |
| SPI1 | LAPTM5    |
| SPI1 | LARP4B    |
| SPI1 | LARP7     |
| SPI1 | LASP1     |
| SPI1 | LCK       |
| SPI1 | LCMT1     |
| SPI1 | LCP1      |
| SPI1 | LEPROT    |
| SPI1 | LETMD1    |
| SPI1 | LGALS8    |
| SPI1 | LGALS9    |
| SPI1 | LHPP      |
| SPI1 | LILRB1    |
| SPI1 | LIMD2     |
| SPI1 | LIMK1     |
| SPI1 | LIMS1     |
| SPI1 | LIMS2     |
| SPI1 | LINC00426 |
| SPI1 | LINC00467 |
| SPI1 | LINC00476 |
| SPI1 | LINC00487 |
| SPI1 | LINC00623 |
| SPI1 | LINC00877 |
| SPI1 | LINC01006 |
| SPI1 | LINC01215 |
| SPI1 | LITAF     |
| SPI1 | LIX1L     |
| SPI1 | LLPH      |
| SPI1 | LMBRD1    |
| SPI1 | LMNA      |
| SPI1 | LMNB1     |
| SPI1 | LMO2      |
| SPI1 | LMO4      |
| SPI1 | LNPEP     |
| SPI1 | LPAR5     |
| SPI1 | LPCAT3    |
| SPI1 | LPIN1     |
| SPI1 | LPP       |
| SPI1 | LPXN      |
| SPI1 | LRBA      |
| SPI1 | LRCH4     |



|      |          |
|------|----------|
| SPI1 | LRIF1    |
| SPI1 | LRMP     |
| SPI1 | LRP10    |
| SPI1 | LRRC32   |
| SPI1 | LRRC45   |
| SPI1 | LRRC47   |
| SPI1 | LRRC58   |
| SPI1 | LRRC61   |
| SPI1 | LRRFIP1  |
| SPI1 | LRWD1    |
| SPI1 | LSM1     |
| SPI1 | LSM3     |
| SPI1 | LSM6     |
| SPI1 | LSP1     |
| SPI1 | LST1     |
| SPI1 | LTA4H    |
| SPI1 | LTB      |
| SPI1 | LY6E     |
| SPI1 | LY75     |
| SPI1 | LY86     |
| SPI1 | LYL1     |
| SPI1 | LYN      |
| SPI1 | LYPLA2   |
| SPI1 | LYPLAL1  |
| SPI1 | LYRM2    |
| SPI1 | LYSMD2   |
| SPI1 | LZIC     |
| SPI1 | MAD1L1   |
| SPI1 | MAD2L1BP |
| SPI1 | MADD     |
| SPI1 | MAEA     |
| SPI1 | MAFG     |
| SPI1 | MAGED2   |
| SPI1 | MAGEF1   |
| SPI1 | MALT1    |
| SPI1 | MAML1    |
| SPI1 | MAN2C1   |
| SPI1 | MANBA    |
| SPI1 | MAP2K1   |
| SPI1 | MAP3K1   |
| SPI1 | MAP3K7   |
| SPI1 | MAP4K1   |
| SPI1 | MAP4K2   |
| SPI1 | MAP4K4   |
| SPI1 | MAP7D1   |
| SPI1 | MAP9     |
| SPI1 | MAPK9    |
| SPI1 | MARCH1   |
| SPI1 | MARCKSL1 |
| SPI1 | MARK3    |

|      |            |
|------|------------|
| SPI1 | MAST3      |
| SPI1 | MAT2B      |
| SPI1 | MAZ        |
| SPI1 | MBD5       |
| SPI1 | MBD6       |
| SPI1 | MBNL1      |
| SPI1 | MBNL3      |
| SPI1 | MBP        |
| SPI1 | MBTD1      |
| SPI1 | MCL1       |
| SPI1 | MCRS1      |
| SPI1 | MCTS1      |
| SPI1 | MDH1       |
| SPI1 | MDM4       |
| SPI1 | MEA1       |
| SPI1 | MED11      |
| SPI1 | MED23      |
| SPI1 | MED25      |
| SPI1 | MED6       |
| SPI1 | MED9       |
| SPI1 | MEF2A      |
| SPI1 | MEF2C      |
| SPI1 | MEMO1      |
| SPI1 | MEN1       |
| SPI1 | MEPCE      |
| SPI1 | METAP2     |
| SPI1 | METTTL17   |
| SPI1 | METTTL23   |
| SPI1 | METTTL3    |
| SPI1 | METTTL9    |
| SPI1 | MFAP1      |
| SPI1 | MFF        |
| SPI1 | MFNG       |
| SPI1 | MFSD11     |
| SPI1 | MGAT3      |
| SPI1 | MGAT5      |
| SPI1 | MGMT       |
| SPI1 | MIB2       |
| SPI1 | MICU1      |
| SPI1 | MICU2      |
| SPI1 | MIDN       |
| SPI1 | MIEN1      |
| SPI1 | MILR1      |
| SPI1 | MINOS1     |
| SPI1 | MIR181A1HG |
| SPI1 | MIR3681HG  |
| SPI1 | MITD1      |
| SPI1 | MKRN1      |
| SPI1 | MLF2       |
| SPI1 | MLXIP      |

|      |         |
|------|---------|
| SPI1 | MLYCD   |
| SPI1 | MMADHC  |
| SPI1 | MOB1A   |
| SPI1 | MOB1B   |
| SPI1 | MOB3A   |
| SPI1 | MOB4    |
| SPI1 | MON1B   |
| SPI1 | MORC3   |
| SPI1 | MORF4L1 |
| SPI1 | MPG     |
| SPI1 | MPI     |
| SPI1 | MPLKIP  |
| SPI1 | MPPE1   |
| SPI1 | MRM2    |
| SPI1 | MRPL10  |
| SPI1 | MRPL13  |
| SPI1 | MRPL16  |
| SPI1 | MRPL27  |
| SPI1 | MRPL28  |
| SPI1 | MRPL33  |
| SPI1 | MRPL38  |
| SPI1 | MRPL43  |
| SPI1 | MRPL44  |
| SPI1 | MRPL48  |
| SPI1 | MRPL52  |
| SPI1 | MRPL54  |
| SPI1 | MRPS18A |
| SPI1 | MRPS18B |
| SPI1 | MRPS21  |
| SPI1 | MS4A1   |
| SPI1 | MSH3    |
| SPI1 | MSL2    |
| SPI1 | MSL3    |
| SPI1 | MSN     |
| SPI1 | MSRA    |
| SPI1 | MTA3    |
| SPI1 | MTERF4  |
| SPI1 | MTF1    |
| SPI1 | MTF2    |
| SPI1 | MTFMT   |
| SPI1 | MTFR2   |
| SPI1 | MTIF2   |
| SPI1 | MTIF3   |
| SPI1 | MTMR12  |
| SPI1 | MTMR14  |
| SPI1 | MTPN    |
| SPI1 | MTRF1L  |
| SPI1 | MUTYH   |
| SPI1 | MX1     |
| SPI1 | MYH9    |

|      |         |
|------|---------|
| SPI1 | MYL12A  |
| SPI1 | MYL12B  |
| SPI1 | MYL6    |
| SPI1 | MYL6B   |
| SPI1 | MY01C   |
| SPI1 | MY01E   |
| SPI1 | MY01F   |
| SPI1 | MY01G   |
| SPI1 | MY09B   |
| SPI1 | N4BP3   |
| SPI1 | NAAA    |
| SPI1 | NAB2    |
| SPI1 | NACA    |
| SPI1 | NADK    |
| SPI1 | NAGK    |
| SPI1 | NAP1L1  |
| SPI1 | NARF    |
| SPI1 | NARFL   |
| SPI1 | NAT1    |
| SPI1 | NAT14   |
| SPI1 | NBPF12  |
| SPI1 | NBR1    |
| SPI1 | NCALD   |
| SPI1 | NCAPD2  |
| SPI1 | NCF1    |
| SPI1 | NCF4    |
| SPI1 | NCKAP1L |
| SPI1 | NCL     |
| SPI1 | NCOA3   |
| SPI1 | NCOA7   |
| SPI1 | NDUFA1  |
| SPI1 | NDUFA13 |
| SPI1 | NDUFA4  |
| SPI1 | NDUFAF3 |
| SPI1 | NDUFAF7 |
| SPI1 | NDUFB3  |
| SPI1 | NDUFB4  |
| SPI1 | NDUFB5  |
| SPI1 | NDUFB9  |
| SPI1 | NDUFS2  |
| SPI1 | NDUFS4  |
| SPI1 | NDUFS7  |
| SPI1 | NDUFV1  |
| SPI1 | NEAT1   |
| SPI1 | NECAP2  |
| SPI1 | NEDD8   |
| SPI1 | NEIL1   |
| SPI1 | NEK1    |
| SPI1 | NEK6    |
| SPI1 | NEK9    |

|      |            |
|------|------------|
| SPI1 | NEMF       |
| SPI1 | NET1       |
| SPI1 | NFATC2     |
| SPI1 | NFATC3     |
| SPI1 | NFATC4     |
| SPI1 | NFIC       |
| SPI1 | NFYB       |
| SPI1 | NFYC       |
| SPI1 | NGRN       |
| SPI1 | NINJ2      |
| SPI1 | NIPBL      |
| SPI1 | NIT1       |
| SPI1 | NKIRAS2    |
| SPI1 | NLK        |
| SPI1 | NLRC3      |
| SPI1 | NLRP2      |
| SPI1 | NMI        |
| SPI1 | NNT        |
| SPI1 | NOL12      |
| SPI1 | NOP10      |
| SPI1 | NOSIP      |
| SPI1 | NR1H2      |
| SPI1 | NR1H3      |
| SPI1 | NR3C1      |
| SPI1 | NRF1       |
| SPI1 | NSMCE1     |
| SPI1 | NSUN5      |
| SPI1 | NT5C2      |
| SPI1 | NT5C3A     |
| SPI1 | NTAN1      |
| SPI1 | NTPCR      |
| SPI1 | NUB1       |
| SPI1 | NUBP1      |
| SPI1 | NUCB1      |
| SPI1 | NUCKS1     |
| SPI1 | NUDCD3     |
| SPI1 | NUDT1      |
| SPI1 | NUGGC      |
| SPI1 | NUMB       |
| SPI1 | NUP107     |
| SPI1 | NUP37      |
| SPI1 | NUTM2B-AS1 |
| SPI1 | OARD1      |
| SPI1 | OAZ1       |
| SPI1 | OAZ2       |
| SPI1 | OCIAD1     |
| SPI1 | OFD1       |
| SPI1 | OGFOD1     |
| SPI1 | OGG1       |
| SPI1 | OMA1       |

|      |          |
|------|----------|
| SPI1 | OPA3     |
| SPI1 | ORAI1    |
| SPI1 | ORAI3    |
| SPI1 | ORC2     |
| SPI1 | ORC4     |
| SPI1 | ORMDL2   |
| SPI1 | OSBPL2   |
| SPI1 | OSBPL8   |
| SPI1 | OSER1    |
| SPI1 | OST4     |
| SPI1 | OSTF1    |
| SPI1 | OTUB1    |
| SPI1 | OXLD1    |
| SPI1 | P2RX5    |
| SPI1 | PABPC1   |
| SPI1 | PABPN1   |
| SPI1 | PACS1    |
| SPI1 | PAFAH1B1 |
| SPI1 | PAFAH1B2 |
| SPI1 | PAFAH1B3 |
| SPI1 | PAG1     |
| SPI1 | PAIP2    |
| SPI1 | PAK2     |
| SPI1 | PALD1    |
| SPI1 | PALLD    |
| SPI1 | PAN2     |
| SPI1 | PANK2    |
| SPI1 | PAPOLA   |
| SPI1 | PARN     |
| SPI1 | PARP12   |
| SPI1 | PARVG    |
| SPI1 | PATZ1    |
| SPI1 | PAX5     |
| SPI1 | PCBP1    |
| SPI1 | PCBP2    |
| SPI1 | PCED1B   |
| SPI1 | PCF11    |
| SPI1 | PCGF1    |
| SPI1 | PCNP     |
| SPI1 | PDCD10   |
| SPI1 | PDCD6    |
| SPI1 | PDCD6IP  |
| SPI1 | PDCD7    |
| SPI1 | PDGFD    |
| SPI1 | PDLIM1   |
| SPI1 | PDLIM2   |
| SPI1 | PDLIM7   |
| SPI1 | PDZD11   |
| SPI1 | PEA15    |
| SPI1 | PEF1     |

|      |            |
|------|------------|
| SPI1 | PET100     |
| SPI1 | PEX16      |
| SPI1 | PFDN1      |
| SPI1 | PFDN5      |
| SPI1 | PFN1       |
| SPI1 | PGAP2      |
| SPI1 | PGBD4      |
| SPI1 | PGGT1B     |
| SPI1 | PGK1       |
| SPI1 | PHB2       |
| SPI1 | PHF11      |
| SPI1 | PHF14      |
| SPI1 | PHF5A      |
| SPI1 | PHF6       |
| SPI1 | PHIP       |
| SPI1 | PHKG2      |
| SPI1 | PHTF2      |
| SPI1 | PI4K2B     |
| SPI1 | PIBF1      |
| SPI1 | PICALM     |
| SPI1 | PIGB0S1    |
| SPI1 | PIGV       |
| SPI1 | PIH1D1     |
| SPI1 | PIK3AP1    |
| SPI1 | PIK3C3     |
| SPI1 | PIK3R1     |
| SPI1 | PILRB      |
| SPI1 | PIN1       |
| SPI1 | PIN4       |
| SPI1 | PIP4K2A    |
| SPI1 | PITPNA     |
| SPI1 | PITPNA-AS1 |
| SPI1 | PKIG       |
| SPI1 | PKM        |
| SPI1 | PKN1       |
| SPI1 | PLAC8      |
| SPI1 | PLEKHA2    |
| SPI1 | PLEKHA3    |
| SPI1 | PLEKHF2    |
| SPI1 | PLEKHJ1    |
| SPI1 | PLEKH01    |
| SPI1 | PLEKH02    |
| SPI1 | PLK1       |
| SPI1 | PLRG1      |
| SPI1 | PLXNC1     |
| SPI1 | PMPCA      |
| SPI1 | PMPCB      |
| SPI1 | PMVK       |
| SPI1 | PNISR      |
| SPI1 | PNKD       |

|      |          |
|------|----------|
| SPI1 | PNN      |
| SPI1 | PNOC     |
| SPI1 | PNPLA8   |
| SPI1 | PNRC1    |
| SPI1 | POLD4    |
| SPI1 | POLDIP3  |
| SPI1 | POLL     |
| SPI1 | POLM     |
| SPI1 | POLQ     |
| SPI1 | POLR2A   |
| SPI1 | POLR2G   |
| SPI1 | POLR2J   |
| SPI1 | POLR2J2  |
| SPI1 | POMP     |
| SPI1 | POP4     |
| SPI1 | POP5     |
| SPI1 | POU2AF1  |
| SPI1 | POU2F1   |
| SPI1 | POU2F2   |
| SPI1 | PPHLN1   |
| SPI1 | PPID     |
| SPI1 | PPIH     |
| SPI1 | PPIL3    |
| SPI1 | PPM1A    |
| SPI1 | PPM1B    |
| SPI1 | PPM1M    |
| SPI1 | PPP1CA   |
| SPI1 | PPP1CC   |
| SPI1 | PPP1R12A |
| SPI1 | PPP1R18  |
| SPI1 | PPP1R35  |
| SPI1 | PPP2R1A  |
| SPI1 | PPP2R5A  |
| SPI1 | PPP2R5C  |
| SPI1 | PPP4C    |
| SPI1 | PPP4R3B  |
| SPI1 | PPP6R1   |
| SPI1 | PPP6R3   |
| SPI1 | PRDM2    |
| SPI1 | PRKACA   |
| SPI1 | PRKAR1A  |
| SPI1 | PRKCB    |
| SPI1 | PRKD2    |
| SPI1 | PRMT2    |
| SPI1 | PRMT6    |
| SPI1 | PRPF3    |
| SPI1 | PRPF38A  |
| SPI1 | PRPF38B  |
| SPI1 | PRPF6    |
| SPI1 | PRPS1    |



|      |           |
|------|-----------|
| SPI1 | PRR13     |
| SPI1 | PRR14     |
| SPI1 | PRR14L    |
| SPI1 | PSD4      |
| SPI1 | PSENEEN   |
| SPI1 | PSIP1     |
| SPI1 | PSMA3-AS1 |
| SPI1 | PSMA4     |
| SPI1 | PSMA8     |
| SPI1 | PSMB3     |
| SPI1 | PSMB4     |
| SPI1 | PSMB8     |
| SPI1 | PSMB8-AS1 |
| SPI1 | PSMD13    |
| SPI1 | PSMD6     |
| SPI1 | PSMD8     |
| SPI1 | PSRC1     |
| SPI1 | PTBP3     |
| SPI1 | PTK2      |
| SPI1 | PTK2B     |
| SPI1 | PTMA      |
| SPI1 | PTP4A1    |
| SPI1 | PTP4A2    |
| SPI1 | PTPDC1    |
| SPI1 | PTPN1     |
| SPI1 | PTPN23    |
| SPI1 | PTPN6     |
| SPI1 | PTPN7     |
| SPI1 | PTPN9     |
| SPI1 | PTPRC     |
| SPI1 | PTPRE     |
| SPI1 | PTRHD1    |
| SPI1 | PUDP      |
| SPI1 | PUM2      |
| SPI1 | PURA      |
| SPI1 | PURB      |
| SPI1 | PYCARD    |
| SPI1 | PYM1      |
| SPI1 | PYROXD1   |
| SPI1 | PYURF     |
| SPI1 | R3HCC1L   |
| SPI1 | R3HDM4    |
| SPI1 | RAB11A    |
| SPI1 | RAB11B    |
| SPI1 | RAB13     |
| SPI1 | RAB14     |
| SPI1 | RAB18     |
| SPI1 | RAB1B     |
| SPI1 | RAB2A     |
| SPI1 | RAB30     |

|      |          |
|------|----------|
| SPI1 | RAB33A   |
| SPI1 | RAB34    |
| SPI1 | RAB35    |
| SPI1 | RAB3GAP2 |
| SPI1 | RAB5B    |
| SPI1 | RAB5C    |
| SPI1 | RAB6A    |
| SPI1 | RAB7A    |
| SPI1 | RAB9A    |
| SPI1 | RABEP2   |
| SPI1 | RABGAP1L |
| SPI1 | RABGEF1  |
| SPI1 | RAC1     |
| SPI1 | RAC2     |
| SPI1 | RACK1    |
| SPI1 | RAD21    |
| SPI1 | RALGAPB  |
| SPI1 | RALGPS2  |
| SPI1 | RALY     |
| SPI1 | RANGAP1  |
| SPI1 | RAP1A    |
| SPI1 | RAP2C    |
| SPI1 | RAPGEF1  |
| SPI1 | RAPGEF6  |
| SPI1 | RASAL1   |
| SPI1 | RASAL3   |
| SPI1 | RASGRP1  |
| SPI1 | RASGRP2  |
| SPI1 | RASGRP3  |
| SPI1 | RASSF1   |
| SPI1 | RASSF2   |
| SPI1 | RB1      |
| SPI1 | RBBP4    |
| SPI1 | RBBP6    |
| SPI1 | RBBP7    |
| SPI1 | RBCK1    |
| SPI1 | RBM14    |
| SPI1 | RBM3     |
| SPI1 | RBM4     |
| SPI1 | RBM42    |
| SPI1 | RBM45    |
| SPI1 | RBM6     |
| SPI1 | RBM8A    |
| SPI1 | RCHY1    |
| SPI1 | RCN1     |
| SPI1 | RCSD1    |
| SPI1 | RECQL    |
| SPI1 | REL      |
| SPI1 | RELA     |
| SPI1 | REPIN1   |

|      |          |
|------|----------|
| SPI1 | RERE     |
| SPI1 | REST     |
| SPI1 | RFC1     |
| SPI1 | RFESD    |
| SPI1 | RFTN1    |
| SPI1 | RFX5     |
| SPI1 | RFXANK   |
| SPI1 | RGCC     |
| SPI1 | RGL2     |
| SPI1 | RGP1     |
| SPI1 | RGS13    |
| SPI1 | RGS14    |
| SPI1 | RGS19    |
| SPI1 | RHBDD1   |
| SPI1 | RHBDD2   |
| SPI1 | RHBDF2   |
| SPI1 | RHOG     |
| SPI1 | RHOH     |
| SPI1 | RIC3     |
| SPI1 | RIC8A    |
| SPI1 | RING1    |
| SPI1 | RINL     |
| SPI1 | RIOK3    |
| SPI1 | RIPK2    |
| SPI1 | RIPK3    |
| SPI1 | RMDN1    |
| SPI1 | RMI1     |
| SPI1 | RMI2     |
| SPI1 | RNASEH2C |
| SPI1 | RNF115   |
| SPI1 | RNF13    |
| SPI1 | RNF141   |
| SPI1 | RNF144B  |
| SPI1 | RNF167   |
| SPI1 | RNF181   |
| SPI1 | RNF20    |
| SPI1 | RNF220   |
| SPI1 | RNF34    |
| SPI1 | RNF6     |
| SPI1 | RNFT2    |
| SPI1 | RNGTT    |
| SPI1 | ROCK1    |
| SPI1 | ROM01    |
| SPI1 | RP2      |
| SPI1 | RPL10    |
| SPI1 | RPL10A   |
| SPI1 | RPL11    |
| SPI1 | RPL12    |
| SPI1 | RPL13A   |
| SPI1 | RPL15    |

|      |         |
|------|---------|
| SPI1 | RPL17   |
| SPI1 | RPL18   |
| SPI1 | RPL18A  |
| SPI1 | RPL19   |
| SPI1 | RPL21   |
| SPI1 | RPL22   |
| SPI1 | RPL23   |
| SPI1 | RPL23A  |
| SPI1 | RPL24   |
| SPI1 | RPL26   |
| SPI1 | RPL27   |
| SPI1 | RPL27A  |
| SPI1 | RPL28   |
| SPI1 | RPL29   |
| SPI1 | RPL3    |
| SPI1 | RPL30   |
| SPI1 | RPL31   |
| SPI1 | RPL32   |
| SPI1 | RPL34   |
| SPI1 | RPL35   |
| SPI1 | RPL36AL |
| SPI1 | RPL37   |
| SPI1 | RPL37A  |
| SPI1 | RPL38   |
| SPI1 | RPL39   |
| SPI1 | RPL4    |
| SPI1 | RPL41   |
| SPI1 | RPL6    |
| SPI1 | RPL7    |
| SPI1 | RPL8    |
| SPI1 | RPLP2   |
| SPI1 | RPS10   |
| SPI1 | RPS11   |
| SPI1 | RPS12   |
| SPI1 | RPS13   |
| SPI1 | RPS14   |
| SPI1 | RPS15   |
| SPI1 | RPS16   |
| SPI1 | RPS17   |
| SPI1 | RPS18   |
| SPI1 | RPS19   |
| SPI1 | RPS20   |
| SPI1 | RPS21   |
| SPI1 | RPS25   |
| SPI1 | RPS26   |
| SPI1 | RPS27   |
| SPI1 | RPS27A  |
| SPI1 | RPS3    |
| SPI1 | RPS3A   |
| SPI1 | RPS4X   |

|      |          |
|------|----------|
| SPI1 | RPS4Y1   |
| SPI1 | RPS5     |
| SPI1 | RPS6     |
| SPI1 | RPS6KA1  |
| SPI1 | RPS7     |
| SPI1 | RPS8     |
| SPI1 | RPSA     |
| SPI1 | RRAGA    |
| SPI1 | RRM2B    |
| SPI1 | RRNAD1   |
| SPI1 | RSU1     |
| SPI1 | RTCA     |
| SPI1 | RTN4     |
| SPI1 | RUFY1    |
| SPI1 | RUFY3    |
| SPI1 | RUNX3    |
| SPI1 | RXRB     |
| SPI1 | S100A10  |
| SPI1 | S100A11  |
| SPI1 | S100A4   |
| SPI1 | S100A6   |
| SPI1 | S1PR2    |
| SPI1 | S1PR4    |
| SPI1 | SAMD15   |
| SPI1 | SASH3    |
| SPI1 | SAT1     |
| SPI1 | SAV1     |
| SPI1 | SCARB1   |
| SPI1 | SCIMP    |
| SPI1 | SCML4    |
| SPI1 | SCNM1    |
| SPI1 | SC01     |
| SPI1 | SC0C     |
| SPI1 | SCRN2    |
| SPI1 | SDCBP    |
| SPI1 | SDCCAG8  |
| SPI1 | SDF2     |
| SPI1 | SDHAF2   |
| SPI1 | SDHAF3   |
| SPI1 | SDHC     |
| SPI1 | SDHD     |
| SPI1 | SEC11A   |
| SPI1 | SEC14L1  |
| SPI1 | SEPT6    |
| SPI1 | SEPT7    |
| SPI1 | SEPT9    |
| SPI1 | SERINC3  |
| SPI1 | SERP2    |
| SPI1 | SERPINB8 |
| SPI1 | SERTAD2  |

|      |          |
|------|----------|
| SPI1 | SETBP1   |
| SPI1 | SETDB1   |
| SPI1 | SETX     |
| SPI1 | SF1      |
| SPI1 | SF3B1    |
| SPI1 | SF3B4    |
| SPI1 | SF3B6    |
| SPI1 | SFI1     |
| SPI1 | SFT2D1   |
| SPI1 | SFT2D2   |
| SPI1 | SGMS1    |
| SPI1 | SG01     |
| SPI1 | SGSH     |
| SPI1 | SH2B2    |
| SPI1 | SH2B3    |
| SPI1 | SH3BGRL  |
| SPI1 | SH3BGRL3 |
| SPI1 | SH3BP1   |
| SPI1 | SH3BP5   |
| SPI1 | SH3KBP1  |
| SPI1 | SH3TC1   |
| SPI1 | SHISA5   |
| SPI1 | SHKBP1   |
| SPI1 | SHOC2    |
| SPI1 | SIAE     |
| SPI1 | SIN3A    |
| SPI1 | SIPA1    |
| SPI1 | SIRT6    |
| SPI1 | SIRT7    |
| SPI1 | SIT1     |
| SPI1 | SKA3     |
| SPI1 | SKAP2    |
| SPI1 | SLAIN2   |
| SPI1 | SLC15A2  |
| SPI1 | SLC15A4  |
| SPI1 | SLC16A3  |
| SPI1 | SLC16A4  |
| SPI1 | SLC25A1  |
| SPI1 | SLC25A11 |
| SPI1 | SLC25A40 |
| SPI1 | SLC25A44 |
| SPI1 | SLC25A53 |
| SPI1 | SLC2A1   |
| SPI1 | SLC2A6   |
| SPI1 | SLC35C2  |
| SPI1 | SLC35E4  |
| SPI1 | SLC39A1  |
| SPI1 | SLC39A13 |
| SPI1 | SLC39A3  |
| SPI1 | SLC41A1  |

|      |          |
|------|----------|
| SPI1 | SLC43A2  |
| SPI1 | SLC4A2   |
| SPI1 | SLC4A8   |
| SPI1 | SLC9A3R1 |
| SPI1 | SLC9A8   |
| SPI1 | SLMAP    |
| SPI1 | SLU7     |
| SPI1 | SMAD2    |
| SPI1 | SMAD4    |
| SPI1 | SMAP2    |
| SPI1 | SMARCAL1 |
| SPI1 | SMARCD2  |
| SPI1 | SMC3     |
| SPI1 | SMG1     |
| SPI1 | SMIM14   |
| SPI1 | SMIM15   |
| SPI1 | SMIM19   |
| SPI1 | SMIM20   |
| SPI1 | SMIM7    |
| SPI1 | SMUG1    |
| SPI1 | SMURF2   |
| SPI1 | SNAP23   |
| SPI1 | SNF8     |
| SPI1 | SNHG19   |
| SPI1 | SNHG25   |
| SPI1 | SNN      |
| SPI1 | SNRNP27  |
| SPI1 | SNRNP70  |
| SPI1 | SNRPA    |
| SPI1 | SNRPA1   |
| SPI1 | SNRPB    |
| SPI1 | SNRPB2   |
| SPI1 | SNRPD2   |
| SPI1 | SNRPN    |
| SPI1 | SNTB2    |
| SPI1 | SNW1     |
| SPI1 | SNX1     |
| SPI1 | SNX10    |
| SPI1 | SNX14    |
| SPI1 | SNX20    |
| SPI1 | SNX22    |
| SPI1 | SNX29    |
| SPI1 | SNX3     |
| SPI1 | SNX30    |
| SPI1 | S0CS1    |
| SPI1 | S0S2     |
| SPI1 | SP100    |
| SPI1 | SP110    |
| SPI1 | SP3      |
| SPI1 | SPAG7    |

|      |          |
|------|----------|
| SPI1 | SPATA2L  |
| SPI1 | SPC25    |
| SPI1 | SPG21    |
| SPI1 | SPI1     |
| SPI1 | SPON1    |
| SPI1 | SPOP     |
| SPI1 | SPRED2   |
| SPI1 | SPSB3    |
| SPI1 | SPTAN1   |
| SPI1 | SPTLC2   |
| SPI1 | SRD5A1   |
| SPI1 | SREK1    |
| SPI1 | SRF      |
| SPI1 | SRP14    |
| SPI1 | SRP9     |
| SPI1 | SRPK2    |
| SPI1 | SRSF5    |
| SPI1 | SRSF9    |
| SPI1 | SSBP2    |
| SPI1 | SSH2     |
| SPI1 | ST14     |
| SPI1 | ST20     |
| SPI1 | ST6GAL1  |
| SPI1 | STAG1    |
| SPI1 | STAMP    |
| SPI1 | STAMPPL1 |
| SPI1 | STAP1    |
| SPI1 | STARD3   |
| SPI1 | STAT6    |
| SPI1 | STAU2    |
| SPI1 | STIL     |
| SPI1 | STIM1    |
| SPI1 | STIM2    |
| SPI1 | STK10    |
| SPI1 | STK16    |
| SPI1 | STK17B   |
| SPI1 | STK24    |
| SPI1 | STK26    |
| SPI1 | STK38    |
| SPI1 | STK4     |
| SPI1 | STK40    |
| SPI1 | STRADA   |
| SPI1 | STRN     |
| SPI1 | STUB1    |
| SPI1 | STX10    |
| SPI1 | STX12    |
| SPI1 | STX5     |
| SPI1 | STX7     |
| SPI1 | STXBP2   |
| SPI1 | SUCLG1   |



|      |          |
|------|----------|
| SPI1 | SUCLG2   |
| SPI1 | SUDS3    |
| SPI1 | SUGCT    |
| SPI1 | SUGT1    |
| SPI1 | SULF2    |
| SPI1 | SUM01    |
| SPI1 | SUN2     |
| SPI1 | SUPT20H  |
| SPI1 | SUPT4H1  |
| SPI1 | SURF1    |
| SPI1 | SUSD3    |
| SPI1 | SUSD6    |
| SPI1 | SVBP     |
| SPI1 | SWI5     |
| SPI1 | SYF2     |
| SPI1 | SYK      |
| SPI1 | SYMPK    |
| SPI1 | SYNRG    |
| SPI1 | SYT17    |
| SPI1 | SYTL1    |
| SPI1 | TACC1    |
| SPI1 | TADA3    |
| SPI1 | TAF1     |
| SPI1 | TAF10    |
| SPI1 | TAF12    |
| SPI1 | TAF15    |
| SPI1 | TAF1B    |
| SPI1 | TAF1C    |
| SPI1 | TAF7     |
| SPI1 | TAGAP    |
| SPI1 | TAGLN2   |
| SPI1 | TALD01   |
| SPI1 | TANG02   |
| SPI1 | TANK     |
| SPI1 | TAOK3    |
| SPI1 | TARS2    |
| SPI1 | TATDN1   |
| SPI1 | TATDN3   |
| SPI1 | TAX1BP3  |
| SPI1 | TBC1D10C |
| SPI1 | TBC1D22A |
| SPI1 | TBCC     |
| SPI1 | TBCK     |
| SPI1 | TBK1     |
| SPI1 | TBPL1    |
| SPI1 | TCF3     |
| SPI1 | TCIRG1   |
| SPI1 | TDP1     |
| SPI1 | TEFM     |
| SPI1 | TEX261   |

|      |              |
|------|--------------|
| SPI1 | TEX264       |
| SPI1 | TFB1M        |
| SPI1 | TFEB         |
| SPI1 | TFIP11       |
| SPI1 | TGIF2        |
| SPI1 | TGOLN2       |
| SPI1 | THAP1        |
| SPI1 | THAP11       |
| SPI1 | THAP4        |
| SPI1 | THG1L        |
| SPI1 | THOC2        |
| SPI1 | THRAP3       |
| SPI1 | THUMPD3-AS1  |
| SPI1 | TIGAR        |
| SPI1 | TIMMDC1      |
| SPI1 | TINF2        |
| SPI1 | TIPARP       |
| SPI1 | TIPRL        |
| SPI1 | TKT          |
| SPI1 | TLN1         |
| SPI1 | TLR10        |
| SPI1 | TM2D1        |
| SPI1 | TMA7         |
| SPI1 | TMBIM4       |
| SPI1 | TMC6         |
| SPI1 | TMC8         |
| SPI1 | TMED8        |
| SPI1 | TMEM101      |
| SPI1 | TMEM128      |
| SPI1 | TMEM138      |
| SPI1 | TMEM14A      |
| SPI1 | TMEM156      |
| SPI1 | TMEM161B-AS1 |
| SPI1 | TMEM18       |
| SPI1 | TMEM206      |
| SPI1 | TMEM230      |
| SPI1 | TMEM234      |
| SPI1 | TMEM242      |
| SPI1 | TMEM254      |
| SPI1 | TMEM256      |
| SPI1 | TMEM30A      |
| SPI1 | TMEM60       |
| SPI1 | TMF1         |
| SPI1 | TMSB4X       |
| SPI1 | TMUB1        |
| SPI1 | TNFAIP8      |
| SPI1 | TNFAIP8L2    |
| SPI1 | TNFRSF13B    |
| SPI1 | TNFRSF13C    |
| SPI1 | TNFRSF1B     |

|      |          |
|------|----------|
| SPI1 | TNK2     |
| SPI1 | TNKS     |
| SPI1 | T0B1     |
| SPI1 | TOP2A    |
| SPI1 | T0R4A    |
| SPI1 | TOX4     |
| SPI1 | TP53RK   |
| SPI1 | TP53TG1  |
| SPI1 | TPD52    |
| SPI1 | TPGS1    |
| SPI1 | TPM3     |
| SPI1 | TPM4     |
| SPI1 | TPR      |
| SPI1 | TPRKB    |
| SPI1 | TRA2B    |
| SPI1 | TRABD    |
| SPI1 | TRADD    |
| SPI1 | TRAF3IP3 |
| SPI1 | TRAF5    |
| SPI1 | TRAF7    |
| SPI1 | TRAK1    |
| SPI1 | TRAPPC1  |
| SPI1 | TRAPPC11 |
| SPI1 | TRAPPC6A |
| SPI1 | TRAPPC8  |
| SPI1 | TRAPPC9  |
| SPI1 | TRIB2    |
| SPI1 | TRIM11   |
| SPI1 | TRIM22   |
| SPI1 | TRIM4    |
| SPI1 | TRIM41   |
| SPI1 | TRIM8    |
| SPI1 | TRIP12   |
| SPI1 | TRM0     |
| SPI1 | TRMT10A  |
| SPI1 | TRMT112  |
| SPI1 | TRMT1L   |
| SPI1 | TRMT2B   |
| SPI1 | TRPT1    |
| SPI1 | TRPV2    |
| SPI1 | TRRAP    |
| SPI1 | TRUB2    |
| SPI1 | TSC22D3  |
| SPI1 | TSC22D4  |
| SPI1 | TSEN34   |
| SPI1 | TSG101   |
| SPI1 | TSNAX    |
| SPI1 | TSPAN33  |
| SPI1 | TSP0     |
| SPI1 | TTC1     |

|      |          |
|------|----------|
| SPI1 | TTC14    |
| SPI1 | TTC37    |
| SPI1 | TTC39C   |
| SPI1 | TTC5     |
| SPI1 | TTC9C    |
| SPI1 | TTF2     |
| SPI1 | TUBA1C   |
| SPI1 | TUBB2A   |
| SPI1 | TUBGCP2  |
| SPI1 | TUBGCP4  |
| SPI1 | TWF2     |
| SPI1 | TXN2     |
| SPI1 | TYSND1   |
| SPI1 | UBA1     |
| SPI1 | UBA3     |
| SPI1 | UBA52    |
| SPI1 | UBA6-AS1 |
| SPI1 | UBAC1    |
| SPI1 | UBAP2    |
| SPI1 | UBB      |
| SPI1 | UBC      |
| SPI1 | UBE2C    |
| SPI1 | UBE2D2   |
| SPI1 | UBE2D3   |
| SPI1 | UBE2E1   |
| SPI1 | UBE2H    |
| SPI1 | UBE2J2   |
| SPI1 | UBE2L3   |
| SPI1 | UBE2N    |
| SPI1 | UBE2Q1   |
| SPI1 | UBE2V2   |
| SPI1 | UBL5     |
| SPI1 | UBL7     |
| SPI1 | UBL7-AS1 |
| SPI1 | UBLCP1   |
| SPI1 | UBTF     |
| SPI1 | UBXN1    |
| SPI1 | UBXN4    |
| SPI1 | UBXN6    |
| SPI1 | UCK1     |
| SPI1 | UCP2     |
| SPI1 | UGGT1    |
| SPI1 | UGP2     |
| SPI1 | UHMK1    |
| SPI1 | UNC119   |
| SPI1 | UNC45A   |
| SPI1 | UNC50    |
| SPI1 | UNC93B1  |
| SPI1 | UPF2     |
| SPI1 | UQCR11   |

|      |         |
|------|---------|
| SPI1 | UQCRC2  |
| SPI1 | UQCRFS1 |
| SPI1 | UQCRH   |
| SPI1 | URM1    |
| SPI1 | USB1    |
| SPI1 | USE1    |
| SPI1 | USF2    |
| SPI1 | USP53   |
| SPI1 | USP7    |
| SPI1 | USP9X   |
| SPI1 | UTP18   |
| SPI1 | UTP3    |
| SPI1 | UVRAG   |
| SPI1 | UXT     |
| SPI1 | VAMP1   |
| SPI1 | VAMP2   |
| SPI1 | VAMP8   |
| SPI1 | VASP    |
| SPI1 | VAV1    |
| SPI1 | VCP     |
| SPI1 | VDAC3   |
| SPI1 | VEZF1   |
| SPI1 | VGLL4   |
| SPI1 | VIM     |
| SPI1 | VNN2    |
| SPI1 | VPS11   |
| SPI1 | VPS13C  |
| SPI1 | VPS16   |
| SPI1 | VPS25   |
| SPI1 | VPS33A  |
| SPI1 | VPS4B   |
| SPI1 | VPS51   |
| SPI1 | VRK3    |
| SPI1 | VTA1    |
| SPI1 | VTI1A   |
| SPI1 | WAC     |
| SPI1 | WARS2   |
| SPI1 | WAS     |
| SPI1 | WASF2   |
| SPI1 | WBP1L   |
| SPI1 | WBP2    |
| SPI1 | WDR1    |
| SPI1 | WDR19   |
| SPI1 | WDR26   |
| SPI1 | WDR34   |
| SPI1 | WDR41   |
| SPI1 | WDR66   |
| SPI1 | WDR70   |
| SPI1 | WDR73   |
| SPI1 | WDR830S |

|      |          |
|------|----------|
| SPI1 | WDTC1    |
| SPI1 | WIPF1    |
| SPI1 | WSB1     |
| SPI1 | WWP2     |
| SPI1 | XKR6     |
| SPI1 | YBEY     |
| SPI1 | YIPF1    |
| SPI1 | YIPF3    |
| SPI1 | YPEL5    |
| SPI1 | YTHDC1   |
| SPI1 | YWHAB    |
| SPI1 | YWHAH    |
| SPI1 | YWHAZ    |
| SPI1 | YY1      |
| SPI1 | ZBED5    |
| SPI1 | ZBTB20   |
| SPI1 | ZBTB43   |
| SPI1 | ZBTB44   |
| SPI1 | ZBTB7A   |
| SPI1 | ZBTB80S  |
| SPI1 | ZC3H10   |
| SPI1 | ZC3H12D  |
| SPI1 | ZC3H18   |
| SPI1 | ZC3HAV1  |
| SPI1 | ZC3HC1   |
| SPI1 | ZCCHC17  |
| SPI1 | ZCCHC7   |
| SPI1 | ZCCHC9   |
| SPI1 | ZCWPW1   |
| SPI1 | ZDHHC12  |
| SPI1 | ZDHHC21  |
| SPI1 | ZDHHC3   |
| SPI1 | ZDHHC4   |
| SPI1 | ZDHHC7   |
| SPI1 | ZFAND3   |
| SPI1 | ZFAND4   |
| SPI1 | ZFAND5   |
| SPI1 | ZFAND6   |
| SPI1 | ZFAS1    |
| SPI1 | ZFC3H1   |
| SPI1 | ZFP36L1  |
| SPI1 | ZFP62    |
| SPI1 | ZFYVE27  |
| SPI1 | ZKSCAN8  |
| SPI1 | ZMAT2    |
| SPI1 | ZMIZ1    |
| SPI1 | ZMPSTE24 |
| SPI1 | ZMYND8   |
| SPI1 | ZNF148   |
| SPI1 | ZNF180   |

|      |          |
|------|----------|
| SPI1 | ZNF197   |
| SPI1 | ZNF266   |
| SPI1 | ZNF267   |
| SPI1 | ZNF296   |
| SPI1 | ZNF318   |
| SPI1 | ZNF330   |
| SPI1 | ZNF385A  |
| SPI1 | ZNF394   |
| SPI1 | ZNF395   |
| SPI1 | ZNF48    |
| SPI1 | ZNF557   |
| SPI1 | ZNF580   |
| SPI1 | ZNF596   |
| SPI1 | ZNF608   |
| SPI1 | ZNF644   |
| SPI1 | ZNF652   |
| SPI1 | ZNF655   |
| SPI1 | ZNF7     |
| SPI1 | ZNF701   |
| SPI1 | ZNF710   |
| SPI1 | ZNF75A   |
| SPI1 | ZNF76    |
| SPI1 | ZNF775   |
| SPI1 | ZNF821   |
| SPI1 | ZNF827   |
| SPI1 | ZNF83    |
| SPI1 | ZNF845   |
| SPI1 | ZNHIT1   |
| SPI1 | ZPBP2    |
| SPI1 | ZRANB2   |
| SPI1 | ZRANB3   |
| SPI1 | ZRSR2    |
| SPI1 | ZYX      |
| SPIB | AAAS     |
| SPIB | AAGAB    |
| SPIB | AAMP     |
| SPIB | AAR2     |
| SPIB | AASDH    |
| SPIB | AASDHPPT |
| SPIB | AATF     |
| SPIB | ABCB7    |
| SPIB | ABCD3    |
| SPIB | ABCD4    |
| SPIB | ABCF1    |
| SPIB | ABHD10   |
| SPIB | ABHD17B  |
| SPIB | ABHD3    |
| SPIB | ABI1     |
| SPIB | ABI3     |
| SPIB | ABL1     |

|      |         |
|------|---------|
| SPIB | ABLIM2  |
| SPIB | ABRACL  |
| SPIB | ABT1    |
| SPIB | ACAA1   |
| SPIB | ACAA2   |
| SPIB | ACAP2   |
| SPIB | ACAT2   |
| SPIB | ACBD3   |
| SPIB | ACBD6   |
| SPIB | ACER3   |
| SPIB | ACIN1   |
| SPIB | AC02    |
| SPIB | AC0T8   |
| SPIB | ACP6    |
| SPIB | ACSF2   |
| SPIB | ACSF3   |
| SPIB | ACSL5   |
| SPIB | ACTA2   |
| SPIB | ACTB    |
| SPIB | ACTG1   |
| SPIB | ACTN1   |
| SPIB | ACTN4   |
| SPIB | ACTR1A  |
| SPIB | ACTR1B  |
| SPIB | ACTR2   |
| SPIB | ACTR3   |
| SPIB | ACTR6   |
| SPIB | ACTR8   |
| SPIB | ACYP1   |
| SPIB | ACYP2   |
| SPIB | ADA     |
| SPIB | ADAM15  |
| SPIB | ADAM8   |
| SPIB | ADAM9   |
| SPIB | ADAP2   |
| SPIB | ADAR    |
| SPIB | ADAT1   |
| SPIB | ADD3    |
| SPIB | ADGRG5  |
| SPIB | ADH5    |
| SPIB | ADI1    |
| SPIB | ADIPOR1 |
| SPIB | ADIPOR2 |
| SPIB | ADK     |
| SPIB | ADO     |
| SPIB | ADPGK   |
| SPIB | ADPRHL2 |
| SPIB | ADSL    |
| SPIB | ADSS    |
| SPIB | AFF2    |



|      |          |
|------|----------|
| SPIB | AFF3     |
| SPIB | AFTPH    |
| SPIB | AGBL5    |
| SPIB | AGFG1    |
| SPIB | AGGF1    |
| SPIB | AG03     |
| SPIB | AHCY     |
| SPIB | AHCYL1   |
| SPIB | AHDC1    |
| SPIB | AHNAK    |
| SPIB | AHSA1    |
| SPIB | AIF1     |
| SPIB | AIFM1    |
| SPIB | AIM2     |
| SPIB | AIMP2    |
| SPIB | AIP      |
| SPIB | AK2      |
| SPIB | AK3      |
| SPIB | AK6      |
| SPIB | AKAP13   |
| SPIB | AKAP8    |
| SPIB | AKIRIN1  |
| SPIB | AKNA     |
| SPIB | AKR1A1   |
| SPIB | AKT2     |
| SPIB | ALAS1    |
| SPIB | ALDH16A1 |
| SPIB | ALDH18A1 |
| SPIB | ALDH5A1  |
| SPIB | ALDOA    |
| SPIB | ALG13    |
| SPIB | ALG6     |
| SPIB | ALG8     |
| SPIB | ALKBH5   |
| SPIB | ALOX5    |
| SPIB | ALOX5AP  |
| SPIB | ALYREF   |
| SPIB | AMD1     |
| SPIB | AMER1    |
| SPIB | AMFR     |
| SPIB | AMPD2    |
| SPIB | ANAPC11  |
| SPIB | ANAPC13  |
| SPIB | ANAPC15  |
| SPIB | ANAPC16  |
| SPIB | ANAPC4   |
| SPIB | ANKHD1   |
| SPIB | ANKRD13A |
| SPIB | ANKRD16  |
| SPIB | ANKRD17  |

|      |           |
|------|-----------|
| SPIB | ANKRD40   |
| SPIB | ANKRD44   |
| SPIB | ANKRD46   |
| SPIB | ANP32B    |
| SPIB | ANP32E    |
| SPIB | ANXA11    |
| SPIB | ANXA4     |
| SPIB | ANXA6     |
| SPIB | AP1AR     |
| SPIB | AP1B1     |
| SPIB | AP1G2     |
| SPIB | AP1M1     |
| SPIB | AP1S1     |
| SPIB | AP1S3     |
| SPIB | AP2A1     |
| SPIB | AP2M1     |
| SPIB | AP2S1     |
| SPIB | AP3B1     |
| SPIB | AP3M1     |
| SPIB | AP3S1     |
| SPIB | AP3S2     |
| SPIB | AP4S1     |
| SPIB | AP5B1     |
| SPIB | AP5M1     |
| SPIB | AP5Z1     |
| SPIB | APAF1     |
| SPIB | APBA3     |
| SPIB | APBB1IP   |
| SPIB | APEX2     |
| SPIB | APH1A     |
| SPIB | APH1B     |
| SPIB | APLP2     |
| SPIB | APOM      |
| SPIB | AQR       |
| SPIB | ARAP2     |
| SPIB | ARCN1     |
| SPIB | ARF1      |
| SPIB | ARF3      |
| SPIB | ARF4      |
| SPIB | ARF5      |
| SPIB | ARF6      |
| SPIB | ARFGEF1   |
| SPIB | ARFGEF2   |
| SPIB | ARGLU1    |
| SPIB | ARHGAP1   |
| SPIB | ARHGAP11A |
| SPIB | ARHGAP12  |
| SPIB | ARHGAP15  |
| SPIB | ARHGAP17  |
| SPIB | ARHGAP24  |

|      |            |
|------|------------|
| SPIB | ARHGAP25   |
| SPIB | ARHGAP27   |
| SPIB | ARHGAP30   |
| SPIB | ARHGAP9    |
| SPIB | ARHGDIA    |
| SPIB | ARHGDIB    |
| SPIB | ARHGEF1    |
| SPIB | ARHGEF2    |
| SPIB | ARHGEF9    |
| SPIB | ARID1B     |
| SPIB | ARID4A     |
| SPIB | ARID4B     |
| SPIB | ARL1       |
| SPIB | ARL14EP    |
| SPIB | ARL5A      |
| SPIB | ARL6IP5    |
| SPIB | ARL6IP6    |
| SPIB | ARMC8      |
| SPIB | ARMC9      |
| SPIB | ARMCX6     |
| SPIB | ARMT1      |
| SPIB | ARPC1A     |
| SPIB | ARPC1B     |
| SPIB | ARPC2      |
| SPIB | ARPC3      |
| SPIB | ARPC4      |
| SPIB | ARPC5L     |
| SPIB | ARPP19     |
| SPIB | ARRB2      |
| SPIB | ARRDC1     |
| SPIB | ARRDC3-AS1 |
| SPIB | ARRDC4     |
| SPIB | ARV1       |
| SPIB | ASB1       |
| SPIB | ASB16-AS1  |
| SPIB | ASB2       |
| SPIB | ASB8       |
| SPIB | ASCC2      |
| SPIB | ASCL2      |
| SPIB | ASH1L      |
| SPIB | ASNA1      |
| SPIB | ASNSD1     |
| SPIB | ASPSCR1    |
| SPIB | ASXL2      |
| SPIB | ATAD1      |
| SPIB | ATAD2      |
| SPIB | ATAD3A     |
| SPIB | ATAT1      |
| SPIB | ATF6B      |
| SPIB | ATF7       |

|      |          |
|------|----------|
| SPIB | ATF7IP   |
| SPIB | ATG101   |
| SPIB | ATG12    |
| SPIB | ATG16L2  |
| SPIB | ATG3     |
| SPIB | ATG4B    |
| SPIB | ATG5     |
| SPIB | ATG7     |
| SPIB | ATM      |
| SPIB | ATOX1    |
| SPIB | ATP13A1  |
| SPIB | ATP1A1   |
| SPIB | ATP1B3   |
| SPIB | ATP2A3   |
| SPIB | ATP2C1   |
| SPIB | ATP6V0A2 |
| SPIB | ATP6V0D1 |
| SPIB | ATP6V0E1 |
| SPIB | ATP6V1B2 |
| SPIB | ATP6V1C1 |
| SPIB | ATP6V1D  |
| SPIB | ATP6V1E1 |
| SPIB | ATP6V1H  |
| SPIB | ATRX     |
| SPIB | ATXN10   |
| SPIB | ATXN2    |
| SPIB | ATXN2L   |
| SPIB | ATXN7L3B |
| SPIB | AURKAIP1 |
| SPIB | B3GALNT1 |
| SPIB | B3GALNT2 |
| SPIB | B3GAT2   |
| SPIB | B3GAT3   |
| SPIB | BABAM1   |
| SPIB | BACE2    |
| SPIB | BACH2    |
| SPIB | BAG5     |
| SPIB | BAG6     |
| SPIB | BAK1     |
| SPIB | BANF1    |
| SPIB | BAP1     |
| SPIB | BASP1    |
| SPIB | BATF     |
| SPIB | BAZ1A    |
| SPIB | BAZ1B    |
| SPIB | BAZ2A    |
| SPIB | BBIP1    |
| SPIB | BCAP31   |
| SPIB | BCAR3    |
| SPIB | BCAT2    |

|      |              |
|------|--------------|
| SPIB | BCCIP        |
| SPIB | BCDIN3D      |
| SPIB | BCKDHB       |
| SPIB | BCL10        |
| SPIB | BCL11A       |
| SPIB | BCL2A1       |
| SPIB | BCL2L1       |
| SPIB | BCL2L13      |
| SPIB | BCL3         |
| SPIB | BCL6         |
| SPIB | BCL7C        |
| SPIB | BCLAF1       |
| SPIB | BDH1         |
| SPIB | BDH2         |
| SPIB | BDP1         |
| SPIB | BECN1        |
| SPIB | BET1         |
| SPIB | BEX2         |
| SPIB | BFAR         |
| SPIB | BID          |
| SPIB | BIK          |
| SPIB | BIRC2        |
| SPIB | BIRC3        |
| SPIB | BIRC6        |
| SPIB | BIVM         |
| SPIB | BLCAP        |
| SPIB | BLK          |
| SPIB | BLMH         |
| SPIB | BLNK         |
| SPIB | BLOC1S2      |
| SPIB | BLOC1S4      |
| SPIB | BLOC1S6      |
| SPIB | BLZF1        |
| SPIB | BMP2K        |
| SPIB | BMPR1A       |
| SPIB | BNIP2        |
| SPIB | BOD1L1       |
| SPIB | BORCS7       |
| SPIB | BORCS8       |
| SPIB | BORCS8-MEF2B |
| SPIB | BPTF         |
| SPIB | BRCA1        |
| SPIB | BRCA2        |
| SPIB | BRCC3        |
| SPIB | BRD2         |
| SPIB | BRD7         |
| SPIB | BRF1         |
| SPIB | BRK1         |
| SPIB | BRMS1        |
| SPIB | BROX         |

|      |           |
|------|-----------|
| SPIB | BRWD3     |
| SPIB | BTAF1     |
| SPIB | BTBD1     |
| SPIB | BTBD19    |
| SPIB | BTF3      |
| SPIB | BTF3L4    |
| SPIB | BTG1      |
| SPIB | BTG2      |
| SPIB | BTK       |
| SPIB | BUB3      |
| SPIB | BUD13     |
| SPIB | BUD31     |
| SPIB | BZW1      |
| SPIB | C11orf24  |
| SPIB | C12orf10  |
| SPIB | C12orf49  |
| SPIB | C12orf73  |
| SPIB | C12orf75  |
| SPIB | C14orf119 |
| SPIB | C15orf40  |
| SPIB | C15orf62  |
| SPIB | C16orf74  |
| SPIB | C16orf91  |
| SPIB | C18orf21  |
| SPIB | C18orf25  |
| SPIB | C18orf54  |
| SPIB | C19orf25  |
| SPIB | C19orf38  |
| SPIB | C19orf48  |
| SPIB | C1GALT1   |
| SPIB | C1orf112  |
| SPIB | C1orf131  |
| SPIB | C1orf50   |
| SPIB | C1orf52   |
| SPIB | C1QBP     |
| SPIB | C22orf34  |
| SPIB | C2orf69   |
| SPIB | C2orf76   |
| SPIB | C3orf14   |
| SPIB | C3orf38   |
| SPIB | C5orf24   |
| SPIB | C5orf34   |
| SPIB | C6orf120  |
| SPIB | C6orf226  |
| SPIB | C6orf48   |
| SPIB | C6orf62   |
| SPIB | C6orf89   |
| SPIB | C6orf99   |
| SPIB | C8orf44   |
| SPIB | C8orf59   |

|      |          |
|------|----------|
| SPIB | C8orf76  |
| SPIB | C9orf16  |
| SPIB | C9orf40  |
| SPIB | C9orf78  |
| SPIB | CAAP1    |
| SPIB | CAB39    |
| SPIB | CABIN1   |
| SPIB | CACNA1A  |
| SPIB | CACYBP   |
| SPIB | CALHM2   |
| SPIB | CALM2    |
| SPIB | CALR     |
| SPIB | CAMK2D   |
| SPIB | CAMK2G   |
| SPIB | CAMK4    |
| SPIB | CAMTA1   |
| SPIB | CAND1    |
| SPIB | CAP1     |
| SPIB | CAPG     |
| SPIB | CAPN1    |
| SPIB | CAPNS1   |
| SPIB | CAPZA1   |
| SPIB | CAPZA2   |
| SPIB | CAPZB    |
| SPIB | CARD11   |
| SPIB | CARD8    |
| SPIB | CARF     |
| SPIB | CARHSP1  |
| SPIB | CARM1    |
| SPIB | CARNMT1  |
| SPIB | CARS     |
| SPIB | CARS2    |
| SPIB | CASC4    |
| SPIB | CASP2    |
| SPIB | CASP4    |
| SPIB | CASP8AP2 |
| SPIB | CBFA2T3  |
| SPIB | CBFB     |
| SPIB | CBL      |
| SPIB | CBLL1    |
| SPIB | CBR4     |
| SPIB | CBWD1    |
| SPIB | CBWD5    |
| SPIB | CBX3     |
| SPIB | CBX5     |
| SPIB | CC2D1A   |
| SPIB | CC2D1B   |
| SPIB | CCAR2    |
| SPIB | CCDC102A |
| SPIB | CCDC106  |

|      |          |
|------|----------|
| SPIB | CCDC107  |
| SPIB | CCDC115  |
| SPIB | CCDC12   |
| SPIB | CCDC125  |
| SPIB | CCDC137  |
| SPIB | CCDC146  |
| SPIB | CCDC174  |
| SPIB | CCDC191  |
| SPIB | CCDC22   |
| SPIB | CCDC25   |
| SPIB | CCDC28B  |
| SPIB | CCDC43   |
| SPIB | CCDC51   |
| SPIB | CCDC6    |
| SPIB | CCDC69   |
| SPIB | CCDC7    |
| SPIB | CCDC71   |
| SPIB | CCDC77   |
| SPIB | CCDC85B  |
| SPIB | CCDC86   |
| SPIB | CCDC88A  |
| SPIB | CCDC88C  |
| SPIB | CCDC91   |
| SPIB | CCDC97   |
| SPIB | CCL22    |
| SPIB | CCL4L2   |
| SPIB | CCM2     |
| SPIB | CCNB1IP1 |
| SPIB | CCNB2    |
| SPIB | CCNC     |
| SPIB | CCND2    |
| SPIB | CCND3    |
| SPIB | CCNDBP1  |
| SPIB | CCNG1    |
| SPIB | CCNG2    |
| SPIB | CCNH     |
| SPIB | CCNI     |
| SPIB | CCNK     |
| SPIB | CCNL1    |
| SPIB | CCNL2    |
| SPIB | CCNT2    |
| SPIB | CCSER2   |
| SPIB | CCT2     |
| SPIB | CCT5     |
| SPIB | CCT7     |
| SPIB | CCZ1     |
| SPIB | CD164    |
| SPIB | CD180    |
| SPIB | CD19     |
| SPIB | CD22     |



|      |          |
|------|----------|
| SPIB | CD24     |
| SPIB | CD2BP2   |
| SPIB | CD37     |
| SPIB | CD40     |
| SPIB | CD52     |
| SPIB | CD53     |
| SPIB | CD70     |
| SPIB | CD72     |
| SPIB | CD74     |
| SPIB | CD79A    |
| SPIB | CD79B    |
| SPIB | CD82     |
| SPIB | CD83     |
| SPIB | CD9      |
| SPIB | CDC123   |
| SPIB | CDC16    |
| SPIB | CDC25A   |
| SPIB | CDC27    |
| SPIB | CDC34    |
| SPIB | CDC37    |
| SPIB | CDC40    |
| SPIB | CDC42    |
| SPIB | CDC42EP3 |
| SPIB | CDC42SE1 |
| SPIB | CDC42SE2 |
| SPIB | CDC5L    |
| SPIB | CDC7     |
| SPIB | CDK10    |
| SPIB | CDK11A   |
| SPIB | CDK11B   |
| SPIB | CDK13    |
| SPIB | CDK17    |
| SPIB | CDK19    |
| SPIB | CDK2AP2  |
| SPIB | CDK4     |
| SPIB | CDK5RAP1 |
| SPIB | CDK5RAP3 |
| SPIB | CDK6     |
| SPIB | CDK7     |
| SPIB | CDK9     |
| SPIB | CDKL3    |
| SPIB | CDKN2AIP |
| SPIB | CDV3     |
| SPIB | CDYL     |
| SPIB | CEBPZ    |
| SPIB | CEBPZOS  |
| SPIB | CELF1    |
| SPIB | CELF2    |
| SPIB | CENPH    |
| SPIB | CENPL    |

|      |         |
|------|---------|
| SPIB | CENPT   |
| SPIB | CEP112  |
| SPIB | CEP135  |
| SPIB | CEP162  |
| SPIB | CEP350  |
| SPIB | CEP41   |
| SPIB | CEP44   |
| SPIB | CEP57   |
| SPIB | CEP63   |
| SPIB | CEP85L  |
| SPIB | CEP97   |
| SPIB | CEPT1   |
| SPIB | CETN3   |
| SPIB | CFAP20  |
| SPIB | CFAP36  |
| SPIB | CFAP97  |
| SPIB | CFDP1   |
| SPIB | CFL1    |
| SPIB | CFLAR   |
| SPIB | CGGBP1  |
| SPIB | CHAC2   |
| SPIB | CHAF1A  |
| SPIB | CHAMP1  |
| SPIB | CHCHD2  |
| SPIB | CHCHD3  |
| SPIB | CHCHD5  |
| SPIB | CHCHD7  |
| SPIB | CHD4    |
| SPIB | CHD7    |
| SPIB | CHD8    |
| SPIB | CHD9    |
| SPIB | CHEK1   |
| SPIB | CHFR    |
| SPIB | CHMP1A  |
| SPIB | CHMP1B  |
| SPIB | CHMP2A  |
| SPIB | CHMP2B  |
| SPIB | CHMP4B  |
| SPIB | CHMP5   |
| SPIB | CHMP7   |
| SPIB | CHRNB1  |
| SPIB | CHST10  |
| SPIB | CHST11  |
| SPIB | CHTF8   |
| SPIB | CHURC1  |
| SPIB | CIAPIN1 |
| SPIB | CIB1    |
| SPIB | CIB2    |
| SPIB | CIC     |
| SPIB | CIITA   |

|      |        |
|------|--------|
| SPIB | CINP   |
| SPIB | CIR1   |
| SPIB | CIRBP  |
| SPIB | CISD2  |
| SPIB | CIZ1   |
| SPIB | CKB    |
| SPIB | CKS2   |
| SPIB | CLASRP |
| SPIB | CLCN7  |
| SPIB | CLECL1 |
| SPIB | CLHC1  |
| SPIB | CLIC1  |
| SPIB | CLIC4  |
| SPIB | CLINT1 |
| SPIB | CLIP2  |
| SPIB | CLK3   |
| SPIB | CLN5   |
| SPIB | CLNS1A |
| SPIB | CLPP   |
| SPIB | CLPX   |
| SPIB | CLTA   |
| SPIB | CLTB   |
| SPIB | CLTC   |
| SPIB | CMAS   |
| SPIB | CMC1   |
| SPIB | CMC2   |
| SPIB | CMTM3  |
| SPIB | CMTM6  |
| SPIB | CMTM7  |
| SPIB | CMTR1  |
| SPIB | CMTR2  |
| SPIB | CNDP2  |
| SPIB | CNIH1  |
| SPIB | CNN2   |
| SPIB | CN0T1  |
| SPIB | CN0T10 |
| SPIB | CN0T11 |
| SPIB | CN0T2  |
| SPIB | CN0T7  |
| SPIB | CN0T8  |
| SPIB | CNP    |
| SPIB | CNPPD1 |
| SPIB | CNPY3  |
| SPIB | CNR2   |
| SPIB | CNST   |
| SPIB | CNTLN  |
| SPIB | COA1   |
| SPIB | COA4   |
| SPIB | COA5   |
| SPIB | COA6   |

|      |         |
|------|---------|
| SPIB | COASY   |
| SPIB | COCH    |
| SPIB | COG2    |
| SPIB | COG4    |
| SPIB | COMMD1  |
| SPIB | COMMD10 |
| SPIB | COMMD2  |
| SPIB | COMMD4  |
| SPIB | COMMD5  |
| SPIB | COMMD6  |
| SPIB | COPB2   |
| SPIB | COPE    |
| SPIB | COPS3   |
| SPIB | COPS5   |
| SPIB | COPS7A  |
| SPIB | COPZ1   |
| SPIB | COQ3    |
| SPIB | COQ4    |
| SPIB | COQ6    |
| SPIB | COQ9    |
| SPIB | COR01A  |
| SPIB | COR01B  |
| SPIB | COX14   |
| SPIB | COX15   |
| SPIB | COX16   |
| SPIB | COX17   |
| SPIB | COX4I1  |
| SPIB | COX5B   |
| SPIB | COX6A1  |
| SPIB | COX6B1  |
| SPIB | COX7A2L |
| SPIB | COX7B   |
| SPIB | COX7C   |
| SPIB | COX8A   |
| SPIB | CPEB2   |
| SPIB | CPNE1   |
| SPIB | CPNE5   |
| SPIB | CPSF2   |
| SPIB | CPSF3   |
| SPIB | CPSF6   |
| SPIB | CPSF7   |
| SPIB | CRB2    |
| SPIB | CRB3    |
| SPIB | CREB1   |
| SPIB | CRIPT   |
| SPIB | CRLF3   |
| SPIB | CRTC2   |
| SPIB | CRYZL1  |
| SPIB | CS      |
| SPIB | CSDE1   |

|      |          |
|------|----------|
| SPIB | CSK      |
| SPIB | CSNK1A1  |
| SPIB | CSNK1D   |
| SPIB | CSNK1G2  |
| SPIB | CSNK1G3  |
| SPIB | CSNK2A1  |
| SPIB | CSNK2A2  |
| SPIB | CSNK2B   |
| SPIB | CSR1     |
| SPIB | CSTB     |
| SPIB | CSTF1    |
| SPIB | CSTF2    |
| SPIB | CSTF2T   |
| SPIB | CSTF3    |
| SPIB | CTCF     |
| SPIB | CTDNEP1  |
| SPIB | CTDSP1   |
| SPIB | CTDSP2   |
| SPIB | CTDSPL2  |
| SPIB | CTNNB1   |
| SPIB | CTNNBL1  |
| SPIB | CTPS1    |
| SPIB | CTPS2    |
| SPIB | CTR9     |
| SPIB | CTSH     |
| SPIB | CTSS     |
| SPIB | CTSZ     |
| SPIB | CUEDC2   |
| SPIB | CUL1     |
| SPIB | CUL2     |
| SPIB | CUL3     |
| SPIB | CUL4A    |
| SPIB | CUTA     |
| SPIB | CUTC     |
| SPIB | CWC15    |
| SPIB | CWC22    |
| SPIB | CWC25    |
| SPIB | CWC27    |
| SPIB | CXCR5    |
| SPIB | CXorf21  |
| SPIB | CXorf38  |
| SPIB | CXXC1    |
| SPIB | CXXC5    |
| SPIB | CYB561A3 |
| SPIB | CYB5B    |
| SPIB | CYB5R3   |
| SPIB | CYB5R4   |
| SPIB | CYBA     |
| SPIB | CYBB     |
| SPIB | CYFIP2   |

|      |         |
|------|---------|
| SPIB | CYLD    |
| SPIB | CYSTM1  |
| SPIB | CYTH1   |
| SPIB | CYTH4   |
| SPIB | DAD1    |
| SPIB | DALRD3  |
| SPIB | DAP     |
| SPIB | DAPK3   |
| SPIB | DAPL1   |
| SPIB | DAPP1   |
| SPIB | DARS    |
| SPIB | DAXX    |
| SPIB | DAZAP1  |
| SPIB | DAZAP2  |
| SPIB | DBNL    |
| SPIB | DCAF10  |
| SPIB | DCAF11  |
| SPIB | DCAF12  |
| SPIB | DCAF15  |
| SPIB | DCAF17  |
| SPIB | DCAF4   |
| SPIB | DCAF6   |
| SPIB | DCAF7   |
| SPIB | DCK     |
| SPIB | DCLRE1C |
| SPIB | DCP2    |
| SPIB | DCTN3   |
| SPIB | DCTN5   |
| SPIB | DCTPP1  |
| SPIB | DCUN1D1 |
| SPIB | DCUN1D5 |
| SPIB | DDA1    |
| SPIB | DDB1    |
| SPIB | DDIAS   |
| SPIB | DDIT3   |
| SPIB | DDOST   |
| SPIB | DDT     |
| SPIB | DDX10   |
| SPIB | DDX11   |
| SPIB | DDX17   |
| SPIB | DDX18   |
| SPIB | DDX19B  |
| SPIB | DDX20   |
| SPIB | DDX21   |
| SPIB | DDX23   |
| SPIB | DDX24   |
| SPIB | DDX27   |
| SPIB | DDX39A  |
| SPIB | DDX3X   |
| SPIB | DDX46   |

|      |            |
|------|------------|
| SPIB | DDX47      |
| SPIB | DDX49      |
| SPIB | DDX5       |
| SPIB | DDX50      |
| SPIB | DDX52      |
| SPIB | DDX56      |
| SPIB | DDX6       |
| SPIB | DECR1      |
| SPIB | DEDD       |
| SPIB | DEF8       |
| SPIB | DENND1B    |
| SPIB | DENND1C    |
| SPIB | DENND2D    |
| SPIB | DENND3     |
| SPIB | DENND4B    |
| SPIB | DENR       |
| SPIB | DEPDC5     |
| SPIB | DERA       |
| SPIB | DFFA       |
| SPIB | DGKA       |
| SPIB | DGKZ       |
| SPIB | DGU0K      |
| SPIB | DHDDS      |
| SPIB | DHFR       |
| SPIB | DH0DH      |
| SPIB | DHPS       |
| SPIB | DHRS1      |
| SPIB | DHRS11     |
| SPIB | DHRS7B     |
| SPIB | DHX15      |
| SPIB | DHX16      |
| SPIB | DHX30      |
| SPIB | DHX34      |
| SPIB | DHX36      |
| SPIB | DHX38      |
| SPIB | DHX9       |
| SPIB | DIAPH1     |
| SPIB | DICER1     |
| SPIB | DID01      |
| SPIB | DIS3L2     |
| SPIB | DLAT       |
| SPIB | DLD        |
| SPIB | DLEU2      |
| SPIB | DLGAP1-AS1 |
| SPIB | DLST       |
| SPIB | DMAP1      |
| SPIB | DMTF1      |
| SPIB | DNAAF5     |
| SPIB | DNAJA1     |
| SPIB | DNAJA2     |

|      |          |
|------|----------|
| SPIB | DNAJA3   |
| SPIB | DNAJB14  |
| SPIB | DNAJB2   |
| SPIB | DNAJB6   |
| SPIB | DNAJC18  |
| SPIB | DNAJC2   |
| SPIB | DNAJC7   |
| SPIB | DNASE1L3 |
| SPIB | DNM1L    |
| SPIB | DNM2     |
| SPIB | DNMT1    |
| SPIB | DNTTIP2  |
| SPIB | DOCK11   |
| SPIB | DOCK2    |
| SPIB | DOCK8    |
| SPIB | DOK2     |
| SPIB | DOK3     |
| SPIB | DOK7     |
| SPIB | DPH2     |
| SPIB | DPH3     |
| SPIB | DPM1     |
| SPIB | DPM2     |
| SPIB | DPM3     |
| SPIB | DPP3     |
| SPIB | DPP8     |
| SPIB | DPP9     |
| SPIB | DPY30    |
| SPIB | DPYSL2   |
| SPIB | DR1      |
| SPIB | DRAM2    |
| SPIB | DSCC1    |
| SPIB | DSTN     |
| SPIB | DSTYK    |
| SPIB | DTD1     |
| SPIB | DTD2     |
| SPIB | DTNBP1   |
| SPIB | DTX1     |
| SPIB | DUS1L    |
| SPIB | DUS3L    |
| SPIB | DUSP12   |
| SPIB | DUSP2    |
| SPIB | DUSP22   |
| SPIB | DUSP28   |
| SPIB | DUSP6    |
| SPIB | DYNC1I2  |
| SPIB | DYNC1LI1 |
| SPIB | DYNLL2   |
| SPIB | DYNLRB1  |
| SPIB | DYNLT1   |
| SPIB | DYRK1A   |



|      |         |
|------|---------|
| SPIB | DZIP3   |
| SPIB | E2F4    |
| SPIB | E2F5    |
| SPIB | EAPP    |
| SPIB | EARS2   |
| SPIB | EBAG9   |
| SPIB | EBF1    |
| SPIB | EBI3    |
| SPIB | ECH1    |
| SPIB | ECHDC1  |
| SPIB | ECSIT   |
| SPIB | EDRF1   |
| SPIB | EEF1A1  |
| SPIB | EEF1B2  |
| SPIB | EEF2    |
| SPIB | EEF2K   |
| SPIB | EEFSEC  |
| SPIB | EEPD1   |
| SPIB | EFCAB14 |
| SPIB | EFHC1   |
| SPIB | EFHD2   |
| SPIB | EFR3A   |
| SPIB | EFTUD2  |
| SPIB | EGLN2   |
| SPIB | EGR1    |
| SPIB | EHBP1L1 |
| SPIB | EHD1    |
| SPIB | EHD4    |
| SPIB | EI24    |
| SPIB | EID3    |
| SPIB | EIF1B   |
| SPIB | EIF2A   |
| SPIB | EIF2AK1 |
| SPIB | EIF2B1  |
| SPIB | EIF2B2  |
| SPIB | EIF2B3  |
| SPIB | EIF2B5  |
| SPIB | EIF2D   |
| SPIB | EIF2S2  |
| SPIB | EIF2S3  |
| SPIB | EIF3A   |
| SPIB | EIF3B   |
| SPIB | EIF3D   |
| SPIB | EIF3F   |
| SPIB | EIF3G   |
| SPIB | EIF3H   |
| SPIB | EIF3I   |
| SPIB | EIF3J   |
| SPIB | EIF3K   |
| SPIB | EIF3L   |

|      |              |
|------|--------------|
| SPIB | EIF3M        |
| SPIB | EIF4A1       |
| SPIB | EIF4A2       |
| SPIB | EIF4E        |
| SPIB | EIF4E2       |
| SPIB | EIF4EBP2     |
| SPIB | EIF4G1       |
| SPIB | EIF4G2       |
| SPIB | EIF4G3       |
| SPIB | EIF4H        |
| SPIB | EIF5A        |
| SPIB | EIF5AL1      |
| SPIB | EIF6         |
| SPIB | ELAC1        |
| SPIB | ELAC2        |
| SPIB | ELAVL1       |
| SPIB | ELF1         |
| SPIB | ELF2         |
| SPIB | ELK4         |
| SPIB | ELM01        |
| SPIB | ELMSAN1      |
| SPIB | ELOF1        |
| SPIB | ELOVL1       |
| SPIB | ELOVL5       |
| SPIB | ELP2         |
| SPIB | ELP3         |
| SPIB | ELP5         |
| SPIB | EMC4         |
| SPIB | EMC6         |
| SPIB | EMC8         |
| SPIB | EMG1         |
| SPIB | EML3         |
| SPIB | EML6         |
| SPIB | EMP3         |
| SPIB | EN01         |
| SPIB | ENTPD4       |
| SPIB | ENY2         |
| SPIB | EP300        |
| SPIB | EP400        |
| SPIB | EPB41L4A-AS1 |
| SPIB | EPC1         |
| SPIB | EPN1         |
| SPIB | EPS15        |
| SPIB | EPSTI1       |
| SPIB | ERAP2        |
| SPIB | ERBIN        |
| SPIB | ERCC1        |
| SPIB | ERCC3        |
| SPIB | ERGIC3       |
| SPIB | ERH          |

|      |           |
|------|-----------|
| SPIB | ERICH1    |
| SPIB | ERP44     |
| SPIB | ESC01     |
| SPIB | ESD       |
| SPIB | ETF1      |
| SPIB | ETFB      |
| SPIB | ETS1      |
| SPIB | EVI2B     |
| SPIB | EVL       |
| SPIB | EX0C2     |
| SPIB | EX0C3     |
| SPIB | EX0C5     |
| SPIB | EX0C7     |
| SPIB | EX0SC3    |
| SPIB | EX0SC4    |
| SPIB | EX0SC5    |
| SPIB | EX0SC6    |
| SPIB | EZR       |
| SPIB | FAAP20    |
| SPIB | FAAP24    |
| SPIB | FABP5     |
| SPIB | FADS3     |
| SPIB | FAM102A   |
| SPIB | FAM104A   |
| SPIB | FAM104B   |
| SPIB | FAM110A   |
| SPIB | FAM120A   |
| SPIB | FAM120A0S |
| SPIB | FAM122A   |
| SPIB | FAM122B   |
| SPIB | FAM122C   |
| SPIB | FAM126A   |
| SPIB | FAM129C   |
| SPIB | FAM168B   |
| SPIB | FAM173A   |
| SPIB | FAM177A1  |
| SPIB | FAM192A   |
| SPIB | FAM199X   |
| SPIB | FAM200B   |
| SPIB | FAM204A   |
| SPIB | FAM206A   |
| SPIB | FAM207A   |
| SPIB | FAM208A   |
| SPIB | FAM208B   |
| SPIB | FAM20B    |
| SPIB | FAM228B   |
| SPIB | FAM234A   |
| SPIB | FAM32A    |
| SPIB | FAM43A    |
| SPIB | FAM49B    |

|      |         |
|------|---------|
| SPIB | FAM72B  |
| SPIB | FAM81A  |
| SPIB | FAM89A  |
| SPIB | FAM96A  |
| SPIB | FAM96B  |
| SPIB | FAM98A  |
| SPIB | FAM98C  |
| SPIB | FANCB   |
| SPIB | FANCC   |
| SPIB | FANCD2  |
| SPIB | FANCF   |
| SPIB | FANCM   |
| SPIB | FARS2   |
| SPIB | FARSA   |
| SPIB | FAS     |
| SPIB | FASN    |
| SPIB | FASTKD1 |
| SPIB | FAU     |
| SPIB | FBL     |
| SPIB | FBR5    |
| SPIB | FBRSL1  |
| SPIB | FBXL12  |
| SPIB | FBXL20  |
| SPIB | FBXL3   |
| SPIB | FBX011  |
| SPIB | FBX022  |
| SPIB | FBX028  |
| SPIB | FBX034  |
| SPIB | FBX042  |
| SPIB | FBX08   |
| SPIB | FBXW2   |
| SPIB | FBXW5   |
| SPIB | FCF1    |
| SPIB | FCH01   |
| SPIB | FCHSD2  |
| SPIB | FCRL1   |
| SPIB | FCRL2   |
| SPIB | FCRL3   |
| SPIB | FCRL5   |
| SPIB | FCRLA   |
| SPIB | FDFT1   |
| SPIB | FDPS    |
| SPIB | FDXR    |
| SPIB | FEN1    |
| SPIB | FERMT3  |
| SPIB | FES     |
| SPIB | FEZ2    |
| SPIB | FGD3    |
| SPIB | FGD6    |
| SPIB | FH      |

|      |           |
|------|-----------|
| SPIB | FHIT      |
| SPIB | FHL3      |
| SPIB | FIBP      |
| SPIB | FIG4      |
| SPIB | FILIP1L   |
| SPIB | FIP1L1    |
| SPIB | FIS1      |
| SPIB | FJX1      |
| SPIB | FKBP1A    |
| SPIB | FKBP1B    |
| SPIB | FKBP5     |
| SPIB | FKBP8     |
| SPIB | FKRP      |
| SPIB | FLAD1     |
| SPIB | FLI1      |
| SPIB | FLNA      |
| SPIB | FLOT1     |
| SPIB | FLOT2     |
| SPIB | FMNL1     |
| SPIB | FMNL3     |
| SPIB | FM04      |
| SPIB | FNBP1     |
| SPIB | FNBP4     |
| SPIB | FNDC3B    |
| SPIB | FNTA      |
| SPIB | FOPNL     |
| SPIB | FOX01     |
| SPIB | FOX03     |
| SPIB | FOXP1     |
| SPIB | FOXP4     |
| SPIB | FPGS      |
| SPIB | FRA10AC1  |
| SPIB | FRG1      |
| SPIB | FRMD8     |
| SPIB | FRS2      |
| SPIB | FTH1      |
| SPIB | FTSJ3     |
| SPIB | FUBP1     |
| SPIB | FUBP3     |
| SPIB | FUCA1     |
| SPIB | FUNDC1    |
| SPIB | FUS       |
| SPIB | FUT7      |
| SPIB | FYN       |
| SPIB | G3BP1     |
| SPIB | G3BP2     |
| SPIB | GAB3      |
| SPIB | GABARAPL2 |
| SPIB | GABPB1    |
| SPIB | GADD45B   |

|      |         |
|------|---------|
| SPIB | GALE    |
| SPIB | GALNT14 |
| SPIB | GALNT7  |
| SPIB | GAPDH   |
| SPIB | GAPVD1  |
| SPIB | GAR1    |
| SPIB | GARS    |
| SPIB | GART    |
| SPIB | GAS8    |
| SPIB | GATAD1  |
| SPIB | GATAD2A |
| SPIB | GCDH    |
| SPIB | GCNT2   |
| SPIB | GDAP1   |
| SPIB | GDI2    |
| SPIB | GEMIN4  |
| SPIB | GEMIN5  |
| SPIB | GEMIN6  |
| SPIB | GEMIN7  |
| SPIB | GEMIN8  |
| SPIB | GEN1    |
| SPIB | GFI1    |
| SPIB | GFM1    |
| SPIB | GFOD1   |
| SPIB | GFOD2   |
| SPIB | GGA1    |
| SPIB | GGNBP2  |
| SPIB | GHITM   |
| SPIB | GID4    |
| SPIB | GIN1    |
| SPIB | GINS2   |
| SPIB | GIT2    |
| SPIB | GLB1    |
| SPIB | GLCE    |
| SPIB | GLRX5   |
| SPIB | GLTP    |
| SPIB | GLUL    |
| SPIB | GMDS    |
| SPIB | GMEB1   |
| SPIB | GMFG    |
| SPIB | GMIP    |
| SPIB | GMNN    |
| SPIB | GMPR2   |
| SPIB | GNA13   |
| SPIB | GNAI2   |
| SPIB | GNAI3   |
| SPIB | GNAS    |
| SPIB | GNB2    |
| SPIB | GNB4    |
| SPIB | GNG11   |

|      |          |
|------|----------|
| SPIB | GNG2     |
| SPIB | GNL1     |
| SPIB | GNL2     |
| SPIB | GNPAT    |
| SPIB | GOLGA7   |
| SPIB | GOLGA8A  |
| SPIB | GOLGA8B  |
| SPIB | GOLPH3   |
| SPIB | GON4L    |
| SPIB | GOPC     |
| SPIB | GORASP2  |
| SPIB | GOSR1    |
| SPIB | GOSR2    |
| SPIB | GPALPP1  |
| SPIB | GPATCH2  |
| SPIB | GPATCH2L |
| SPIB | GPATCH8  |
| SPIB | GPBP1    |
| SPIB | GPM6B    |
| SPIB | GPN1     |
| SPIB | GPN2     |
| SPIB | GPR108   |
| SPIB | GPR137   |
| SPIB | GPR155   |
| SPIB | GPR18    |
| SPIB | GPR34    |
| SPIB | GPR82    |
| SPIB | GPS1     |
| SPIB | GPSM3    |
| SPIB | GRAMD1A  |
| SPIB | GRAMD4   |
| SPIB | GRAP     |
| SPIB | GRB2     |
| SPIB | GRK2     |
| SPIB | GRK6     |
| SPIB | GRN      |
| SPIB | GRPEL1   |
| SPIB | GRPEL2   |
| SPIB | GRWD1    |
| SPIB | GSDMD    |
| SPIB | GSE1     |
| SPIB | GSK3B    |
| SPIB | GSKIP    |
| SPIB | GSPT1    |
| SPIB | GSPT2    |
| SPIB | GTDC1    |
| SPIB | GTF2A2   |
| SPIB | GTF2E2   |
| SPIB | GTF2F1   |
| SPIB | GTF2F2   |

|      |          |
|------|----------|
| SPIB | GTF2H1   |
| SPIB | GTF2H2   |
| SPIB | GTF2H3   |
| SPIB | GTF3A    |
| SPIB | GTF3C1   |
| SPIB | GTF3C2   |
| SPIB | GTF3C5   |
| SPIB | GTPBP2   |
| SPIB | GTPBP4   |
| SPIB | GTPBP8   |
| SPIB | GTSF1    |
| SPIB | GUCD1    |
| SPIB | GYG1     |
| SPIB | GYPC     |
| SPIB | H2AFY    |
| SPIB | HAGHL    |
| SPIB | HARS     |
| SPIB | HAT1     |
| SPIB | HCCS     |
| SPIB | HCFC1    |
| SPIB | HCG11    |
| SPIB | HCK      |
| SPIB | HCLS1    |
| SPIB | HCST     |
| SPIB | HDAC7    |
| SPIB | HDDC2    |
| SPIB | HDHD2    |
| SPIB | HEATR1   |
| SPIB | HECA     |
| SPIB | HECTD1   |
| SPIB | HECTD2   |
| SPIB | HERC2    |
| SPIB | HERC4    |
| SPIB | HERPUD1  |
| SPIB | HES1     |
| SPIB | HEXIM2   |
| SPIB | HGH1     |
| SPIB | HHEX     |
| SPIB | HIF1AN   |
| SPIB | HIGD1A   |
| SPIB | HIGD2A   |
| SPIB | HINT1    |
| SPIB | HK1      |
| SPIB | HLA-DMB  |
| SPIB | HLA-DRA  |
| SPIB | HLA-DRB1 |
| SPIB | HMBX1    |
| SPIB | HMBS     |
| SPIB | HMG20A   |
| SPIB | HMGA1    |



|      |           |
|------|-----------|
| SPIB | HMGB1     |
| SPIB | HMGB2     |
| SPIB | HMGN1     |
| SPIB | HMGN2     |
| SPIB | HMGXB3    |
| SPIB | HMHB1     |
| SPIB | HNRNPA0   |
| SPIB | HNRNPA2B1 |
| SPIB | HNRNPAB   |
| SPIB | HNRNPC    |
| SPIB | HNRNPD    |
| SPIB | HNRNPF    |
| SPIB | HNRNPH2   |
| SPIB | HNRNPH3   |
| SPIB | HNRNPK    |
| SPIB | HNRNPL    |
| SPIB | HNRNPR    |
| SPIB | HNRNPU    |
| SPIB | HNRNPUL1  |
| SPIB | HOPX      |
| SPIB | HP1BP3    |
| SPIB | HPCAL1    |
| SPIB | HPF1      |
| SPIB | HPS1      |
| SPIB | HPS3      |
| SPIB | HPS4      |
| SPIB | HPS5      |
| SPIB | HSBP1     |
| SPIB | HSCB      |
| SPIB | HSD17B10  |
| SPIB | HSF1      |
| SPIB | HSP90AA1  |
| SPIB | HSP90AB1  |
| SPIB | HSPA4     |
| SPIB | HSPA8     |
| SPIB | HSPBP1    |
| SPIB | HSPD1     |
| SPIB | HSPE1     |
| SPIB | HSPH1     |
| SPIB | HTATSF1   |
| SPIB | HTT       |
| SPIB | HUWE1     |
| SPIB | HVCN1     |
| SPIB | ICAM1     |
| SPIB | ICAM3     |
| SPIB | ICE2      |
| SPIB | ICMT      |
| SPIB | ID2       |
| SPIB | ID3       |
| SPIB | IDE       |

|      |         |
|------|---------|
| SPIB | IDH3A   |
| SPIB | IDH3B   |
| SPIB | IDI1    |
| SPIB | IER2    |
| SPIB | IER5    |
| SPIB | IFF01   |
| SPIB | IFI30   |
| SPIB | IFNGR2  |
| SPIB | IFRD1   |
| SPIB | IFT20   |
| SPIB | IFT22   |
| SPIB | IFT52   |
| SPIB | IGBP1   |
| SPIB | IGF2BP3 |
| SPIB | IGF2R   |
| SPIB | IKBKB   |
| SPIB | IKBKE   |
| SPIB | IKBKG   |
| SPIB | IKZF1   |
| SPIB | IKZF3   |
| SPIB | IL16    |
| SPIB | IL21R   |
| SPIB | IL2RA   |
| SPIB | IL4I1   |
| SPIB | IL4R    |
| SPIB | IL7     |
| SPIB | ILF2    |
| SPIB | ILF3    |
| SPIB | ILK     |
| SPIB | IMP3    |
| SPIB | IMP4    |
| SPIB | IMPA1   |
| SPIB | IMPACT  |
| SPIB | IMPAD1  |
| SPIB | IMPDH1  |
| SPIB | INAFM1  |
| SPIB | INF2    |
| SPIB | ING1    |
| SPIB | ING2    |
| SPIB | ING4    |
| SPIB | INIP    |
| SPIB | IN080C  |
| SPIB | IN080E  |
| SPIB | INPP1   |
| SPIB | INPP5B  |
| SPIB | INPP5D  |
| SPIB | INTS1   |
| SPIB | INTS2   |
| SPIB | INTS3   |
| SPIB | INTS4   |

|      |          |
|------|----------|
| SPIB | INTS6    |
| SPIB | INTS9    |
| SPIB | IP6K2    |
| SPIB | IP04     |
| SPIB | IP07     |
| SPIB | IP08     |
| SPIB | IQGAP1   |
| SPIB | IQSEC1   |
| SPIB | IRF2BP2  |
| SPIB | IRF4     |
| SPIB | IRF5     |
| SPIB | IRF8     |
| SPIB | ISCA2    |
| SPIB | ISG20    |
| SPIB | ISG20L2  |
| SPIB | ISL2     |
| SPIB | IST1     |
| SPIB | ISY1     |
| SPIB | ISYNA1   |
| SPIB | ITFG1    |
| SPIB | ITFG2    |
| SPIB | ITGAL    |
| SPIB | ITGB1    |
| SPIB | ITGB1BP1 |
| SPIB | ITGB2    |
| SPIB | ITGB3BP  |
| SPIB | ITGB7    |
| SPIB | ITPA     |
| SPIB | ITPKB    |
| SPIB | ITPR1    |
| SPIB | ITPR3    |
| SPIB | ITSN2    |
| SPIB | IVD      |
| SPIB | IVNS1ABP |
| SPIB | IZUM04   |
| SPIB | JADE2    |
| SPIB | JAK1     |
| SPIB | JAK2     |
| SPIB | JAML     |
| SPIB | JDP2     |
| SPIB | JKAMP    |
| SPIB | JMJD1C   |
| SPIB | JMJD8    |
| SPIB | JTB      |
| SPIB | KANSL1   |
| SPIB | KANSL3   |
| SPIB | KARS     |
| SPIB | KAT2A    |
| SPIB | KAT5     |
| SPIB | KAT6A    |

|      |           |
|------|-----------|
| SPIB | KAT6B     |
| SPIB | KAT8      |
| SPIB | KATNA1    |
| SPIB | KBTBD4    |
| SPIB | KBTBD8    |
| SPIB | KCMF1     |
| SPIB | KCNAB2    |
| SPIB | KCNN4     |
| SPIB | KCTD13    |
| SPIB | KCTD17    |
| SPIB | KCTD18    |
| SPIB | KCTD20    |
| SPIB | KCTD6     |
| SPIB | KDM1B     |
| SPIB | KDM2B     |
| SPIB | KDM3A     |
| SPIB | KDM5A     |
| SPIB | KDM5B     |
| SPIB | KDM6A     |
| SPIB | KDM6B     |
| SPIB | KEAP1     |
| SPIB | KHDRBS1   |
| SPIB | KIAA0040  |
| SPIB | KIAA0232  |
| SPIB | KIAA1217  |
| SPIB | KIAA2013  |
| SPIB | KIDINS220 |
| SPIB | KIF16B    |
| SPIB | KIF1C     |
| SPIB | KIF20B    |
| SPIB | KIF2A     |
| SPIB | KIF3B     |
| SPIB | KIF5B     |
| SPIB | KIN       |
| SPIB | KLC1      |
| SPIB | KLF10     |
| SPIB | KLF8      |
| SPIB | KLHDC4    |
| SPIB | KLHL14    |
| SPIB | KLHL18    |
| SPIB | KLHL42    |
| SPIB | KLHL5     |
| SPIB | KLHL6     |
| SPIB | KLRG1     |
| SPIB | KMO       |
| SPIB | KMT2B     |
| SPIB | KMT2C     |
| SPIB | KMT2E     |
| SPIB | KNOP1     |
| SPIB | KPNB1     |

|      |           |
|------|-----------|
| SPIB | KRAS      |
| SPIB | KRBOX4    |
| SPIB | KRCC1     |
| SPIB | KRI1      |
| SPIB | KRIT1     |
| SPIB | KRR1      |
| SPIB | KYAT1     |
| SPIB | LAMTOR1   |
| SPIB | LAMTOR3   |
| SPIB | LAMTOR4   |
| SPIB | LAPTM5    |
| SPIB | LARP4     |
| SPIB | LARP4B    |
| SPIB | LARP7     |
| SPIB | LARS      |
| SPIB | LAS1L     |
| SPIB | LASP1     |
| SPIB | LCK       |
| SPIB | LCMT1     |
| SPIB | LCMT2     |
| SPIB | LCOR      |
| SPIB | LCP1      |
| SPIB | LDAH      |
| SPIB | LDHA      |
| SPIB | LEKR1     |
| SPIB | LENG1     |
| SPIB | LENG8     |
| SPIB | LEPROTL1  |
| SPIB | LETMD1    |
| SPIB | LGALS9    |
| SPIB | LHFPL2    |
| SPIB | LHPP      |
| SPIB | LILRB1    |
| SPIB | LILRB3    |
| SPIB | LIMD2     |
| SPIB | LIMK1     |
| SPIB | LIMS1     |
| SPIB | LINC00467 |
| SPIB | LINC00667 |
| SPIB | LINC00954 |
| SPIB | LINC01136 |
| SPIB | LINC01184 |
| SPIB | LINC01215 |
| SPIB | LIPE-AS1  |
| SPIB | LITAF     |
| SPIB | LLPH      |
| SPIB | LMAN2     |
| SPIB | LMCD1     |
| SPIB | LMNB1     |
| SPIB | LMNB2     |

|      |         |
|------|---------|
| SPIB | LM02    |
| SPIB | LNPEP   |
| SPIB | LONP1   |
| SPIB | LONRF1  |
| SPIB | LOXL2   |
| SPIB | LPAR5   |
| SPIB | LPGAT1  |
| SPIB | LPP     |
| SPIB | LPP-AS2 |
| SPIB | LPXN    |
| SPIB | LRCH1   |
| SPIB | LRCH4   |
| SPIB | LRIF1   |
| SPIB | LRMP    |
| SPIB | LRP10   |
| SPIB | LRPPRC  |
| SPIB | LRR32   |
| SPIB | LRR45   |
| SPIB | LRR47   |
| SPIB | LRR58   |
| SPIB | LRR59   |
| SPIB | LRR61   |
| SPIB | LRR8D   |
| SPIB | LRRFIP1 |
| SPIB | LRRFIP2 |
| SPIB | LRRK2   |
| SPIB | LRWD1   |
| SPIB | LSAMP   |
| SPIB | LSG1    |
| SPIB | LSM1    |
| SPIB | LSM12   |
| SPIB | LSM2    |
| SPIB | LSM3    |
| SPIB | LSM5    |
| SPIB | LSM8    |
| SPIB | LSP1    |
| SPIB | LTA     |
| SPIB | LTA4H   |
| SPIB | LTB     |
| SPIB | LTB4R   |
| SPIB | LTV1    |
| SPIB | LUC7L   |
| SPIB | LUC7L2  |
| SPIB | LXN     |
| SPIB | LY6E    |
| SPIB | LYL1    |
| SPIB | LYN     |
| SPIB | LYPLA2  |
| SPIB | LYPLAL1 |
| SPIB | LYRM1   |

|      |           |
|------|-----------|
| SPIB | LYRM2     |
| SPIB | LYRM7     |
| SPIB | LYSMD2    |
| SPIB | LZIC      |
| SPIB | M6PR      |
| SPIB | MACROD1   |
| SPIB | MAD1L1    |
| SPIB | MAD2L1    |
| SPIB | MADD      |
| SPIB | MAEA      |
| SPIB | MAFF      |
| SPIB | MAFK      |
| SPIB | MAGED1    |
| SPIB | MAGED2    |
| SPIB | MAGEF1    |
| SPIB | MAGOH     |
| SPIB | MAK16     |
| SPIB | MALSU1    |
| SPIB | MALT1     |
| SPIB | MANBAL    |
| SPIB | MAP1S     |
| SPIB | MAP2K3    |
| SPIB | MAP2K6    |
| SPIB | MAP3K1    |
| SPIB | MAP3K11   |
| SPIB | MAP3K13   |
| SPIB | MAP3K7    |
| SPIB | MAP3K7CL  |
| SPIB | MAP3K8    |
| SPIB | MAP4      |
| SPIB | MAP4K1    |
| SPIB | MAP4K2    |
| SPIB | MAP4K4    |
| SPIB | MAP7D1    |
| SPIB | MAP7D3    |
| SPIB | MAPK1IP1L |
| SPIB | MAPK3     |
| SPIB | MAPK9     |
| SPIB | MAPKAP1   |
| SPIB | MAPKAPK2  |
| SPIB | MAPKAPK3  |
| SPIB | MAPRE1    |
| SPIB | MAPRE2    |
| SPIB | MARCH1    |
| SPIB | MARCKSL1  |
| SPIB | MARK2     |
| SPIB | MARK3     |
| SPIB | MARS      |
| SPIB | MAST2     |
| SPIB | MAST3     |

|      |        |
|------|--------|
| SPIB | MAST4  |
| SPIB | MASTL  |
| SPIB | MAT2A  |
| SPIB | MAT2B  |
| SPIB | MAX    |
| SPIB | MBD2   |
| SPIB | MBD5   |
| SPIB | MBNL1  |
| SPIB | MBOAT2 |
| SPIB | MBP    |
| SPIB | MBTD1  |
| SPIB | MCAT   |
| SPIB | MCCC1  |
| SPIB | MCL1   |
| SPIB | MCM3   |
| SPIB | MCM3AP |
| SPIB | MCM5   |
| SPIB | MCM7   |
| SPIB | MCM8   |
| SPIB | MCRIP1 |
| SPIB | MCRIP2 |
| SPIB | MCRS1  |
| SPIB | MCTS1  |
| SPIB | MDH1   |
| SPIB | MDM4   |
| SPIB | MDN1   |
| SPIB | ME2    |
| SPIB | MEA1   |
| SPIB | MECR   |
| SPIB | MED10  |
| SPIB | MED11  |
| SPIB | MED12L |
| SPIB | MED15  |
| SPIB | MED17  |
| SPIB | MED19  |
| SPIB | MED23  |
| SPIB | MED25  |
| SPIB | MED26  |
| SPIB | MED27  |
| SPIB | MED30  |
| SPIB | MED4   |
| SPIB | MED6   |
| SPIB | MED7   |
| SPIB | MEF2A  |
| SPIB | MEF2D  |
| SPIB | MEIG1  |
| SPIB | MELK   |
| SPIB | MEPCE  |
| SPIB | MEST   |
| SPIB | METAP2 |



|      |           |
|------|-----------|
| SPIB | METRNL    |
| SPIB | METTLL14  |
| SPIB | METTLL17  |
| SPIB | METTLL18  |
| SPIB | METTLL21A |
| SPIB | METTLL23  |
| SPIB | METTLL2A  |
| SPIB | METTLL2B  |
| SPIB | METTLL3   |
| SPIB | METTLL5   |
| SPIB | METTLL6   |
| SPIB | METTLL9   |
| SPIB | MEX3C     |
| SPIB | MFAP1     |
| SPIB | MFF       |
| SPIB | MFHAS1    |
| SPIB | MFN1      |
| SPIB | MFNG      |
| SPIB | MFSD1     |
| SPIB | MFSD10    |
| SPIB | MFSD5     |
| SPIB | MFSD9     |
| SPIB | MGA       |
| SPIB | MGAT3     |
| SPIB | MGAT5     |
| SPIB | MGMT      |
| SPIB | MIB2      |
| SPIB | MICAL3    |
| SPIB | MICALL1   |
| SPIB | MICU2     |
| SPIB | MID1IP1   |
| SPIB | MIDN      |
| SPIB | MIEF1     |
| SPIB | MIEN1     |
| SPIB | MIER1     |
| SPIB | MIER2     |
| SPIB | MIER3     |
| SPIB | MILR1     |
| SPIB | MINOS1    |
| SPIB | MIOS      |
| SPIB | MIR3681HG |
| SPIB | MIS18BP1  |
| SPIB | MITD1     |
| SPIB | MKLN1     |
| SPIB | MKNK1     |
| SPIB | MKRN1     |
| SPIB | MKRN2     |
| SPIB | MLEC      |
| SPIB | MLF2      |
| SPIB | MLLT10    |

|      |           |
|------|-----------|
| SPIB | MLXIP     |
| SPIB | MLYCD     |
| SPIB | MMADHC    |
| SPIB | MMD       |
| SPIB | MME       |
| SPIB | MMS19     |
| SPIB | MNT       |
| SPIB | MOB1A     |
| SPIB | MOB1B     |
| SPIB | MOB3A     |
| SPIB | MOB4      |
| SPIB | MORC2     |
| SPIB | MORC2-AS1 |
| SPIB | MORF4L1   |
| SPIB | MORN2     |
| SPIB | MPC2      |
| SPIB | MPDU1     |
| SPIB | MPEG1     |
| SPIB | MPG       |
| SPIB | MPI       |
| SPIB | MPLKIP    |
| SPIB | MPV17     |
| SPIB | MPZL1     |
| SPIB | MRM2      |
| SPIB | MROH1     |
| SPIB | MRPL10    |
| SPIB | MRPL12    |
| SPIB | MRPL13    |
| SPIB | MRPL14    |
| SPIB | MRPL16    |
| SPIB | MRPL17    |
| SPIB | MRPL18    |
| SPIB | MRPL20    |
| SPIB | MRPL21    |
| SPIB | MRPL22    |
| SPIB | MRPL23    |
| SPIB | MRPL24    |
| SPIB | MRPL27    |
| SPIB | MRPL28    |
| SPIB | MRPL3     |
| SPIB | MRPL33    |
| SPIB | MRPL40    |
| SPIB | MRPL43    |
| SPIB | MRPL44    |
| SPIB | MRPL47    |
| SPIB | MRPL48    |
| SPIB | MRPL49    |
| SPIB | MRPL51    |
| SPIB | MRPL52    |
| SPIB | MRPL54    |

|      |         |
|------|---------|
| SPIB | MRPS10  |
| SPIB | MRPS16  |
| SPIB | MRPS18A |
| SPIB | MRPS18B |
| SPIB | MRPS18C |
| SPIB | MRPS21  |
| SPIB | MRPS22  |
| SPIB | MRPS23  |
| SPIB | MRPS31  |
| SPIB | MRPS33  |
| SPIB | MRPS34  |
| SPIB | MRRF    |
| SPIB | MS4A1   |
| SPIB | MSANTD3 |
| SPIB | MSANTD4 |
| SPIB | MSH2    |
| SPIB | MSH3    |
| SPIB | MSH6    |
| SPIB | MSI2    |
| SPIB | MSL3    |
| SPIB | MSN     |
| SPIB | MSRB1   |
| SPIB | MTA3    |
| SPIB | MTCH2   |
| SPIB | MTERF3  |
| SPIB | MTERF4  |
| SPIB | MTF2    |
| SPIB | MTFMT   |
| SPIB | MTFR1L  |
| SPIB | MTHFD1L |
| SPIB | MTIF2   |
| SPIB | MTIF3   |
| SPIB | MTMR12  |
| SPIB | MTMR14  |
| SPIB | MTMR2   |
| SPIB | MTMR9   |
| SPIB | MTPN    |
| SPIB | MTR     |
| SPIB | MTRF1   |
| SPIB | MTURN   |
| SPIB | MTX2    |
| SPIB | MUL1    |
| SPIB | MUS81   |
| SPIB | MUTYH   |
| SPIB | MVB12A  |
| SPIB | MYC     |
| SPIB | MYCBP2  |
| SPIB | MYD88   |
| SPIB | MYH10   |
| SPIB | MYH9    |

|      |         |
|------|---------|
| SPIB | MYL12A  |
| SPIB | MYL12B  |
| SPIB | MYL5    |
| SPIB | MYL6    |
| SPIB | MYL6B   |
| SPIB | MYNN    |
| SPIB | MY01C   |
| SPIB | MY01E   |
| SPIB | MY01F   |
| SPIB | MY01G   |
| SPIB | MY05A   |
| SPIB | MY09B   |
| SPIB | N4BP3   |
| SPIB | NAA10   |
| SPIB | NAA20   |
| SPIB | NAA30   |
| SPIB | NAA35   |
| SPIB | NAA40   |
| SPIB | NAA50   |
| SPIB | NAA60   |
| SPIB | NAB2    |
| SPIB | NABP2   |
| SPIB | NACA    |
| SPIB | NADK    |
| SPIB | NADSYN1 |
| SPIB | NAGK    |
| SPIB | NAP1L1  |
| SPIB | NAP1L4  |
| SPIB | NAPA    |
| SPIB | NAPEPLD |
| SPIB | NARF    |
| SPIB | NARFL   |
| SPIB | NASP    |
| SPIB | NAT10   |
| SPIB | NAT9    |
| SPIB | NBEA    |
| SPIB | NBEAL1  |
| SPIB | NBPF20  |
| SPIB | NCBP1   |
| SPIB | NCBP2   |
| SPIB | NCF1    |
| SPIB | NCF2    |
| SPIB | NCF4    |
| SPIB | NCKAP1L |
| SPIB | NCL     |
| SPIB | NCOA3   |
| SPIB | NCOA5   |
| SPIB | NDE1    |
| SPIB | NDN     |
| SPIB | NDUFA1  |

|      |         |
|------|---------|
| SPIB | NDUFA13 |
| SPIB | NDUFA4  |
| SPIB | NDUFA5  |
| SPIB | NDUFAF1 |
| SPIB | NDUFAF3 |
| SPIB | NDUFAF6 |
| SPIB | NDUFB2  |
| SPIB | NDUFB3  |
| SPIB | NDUFB4  |
| SPIB | NDUFB5  |
| SPIB | NDUFB7  |
| SPIB | NDUFB9  |
| SPIB | NDUFS1  |
| SPIB | NDUFS2  |
| SPIB | NDUFS3  |
| SPIB | NDUFS4  |
| SPIB | NDUFS7  |
| SPIB | NDUFV1  |
| SPIB | NEAT1   |
| SPIB | NECAP1  |
| SPIB | NECAP2  |
| SPIB | NEDD8   |
| SPIB | NEIL1   |
| SPIB | NEK6    |
| SPIB | NEK8    |
| SPIB | NELFA   |
| SPIB | NELFB   |
| SPIB | NELFCD  |
| SPIB | NELFE   |
| SPIB | NFAT5   |
| SPIB | NFATC1  |
| SPIB | NFATC2  |
| SPIB | NFATC3  |
| SPIB | NFE2L2  |
| SPIB | NFKB1   |
| SPIB | NFKB2   |
| SPIB | NFKBIB  |
| SPIB | NFKBID  |
| SPIB | NFKBIE  |
| SPIB | NFKBIL1 |
| SPIB | NFKBIZ  |
| SPIB | NFS1    |
| SPIB | NFX1    |
| SPIB | NFYC    |
| SPIB | NGDN    |
| SPIB | NIF3L1  |
| SPIB | NIFK    |
| SPIB | NINJ1   |
| SPIB | NIP7    |
| SPIB | NIPAL3  |

|      |         |
|------|---------|
| SPIB | NIPBL   |
| SPIB | NIT1    |
| SPIB | NKAP    |
| SPIB | NKIRAS2 |
| SPIB | NLRC3   |
| SPIB | NLRP2   |
| SPIB | NMD3    |
| SPIB | NME1    |
| SPIB | NME7    |
| SPIB | NMI     |
| SPIB | NMRAL1  |
| SPIB | NMU     |
| SPIB | NNT     |
| SPIB | NNT-AS1 |
| SPIB | NOB1    |
| SPIB | NOC2L   |
| SPIB | NOC3L   |
| SPIB | NOL10   |
| SPIB | NOL11   |
| SPIB | NOL12   |
| SPIB | NOL7    |
| SPIB | NOL8    |
| SPIB | NOL9    |
| SPIB | NOM1    |
| SPIB | NONO    |
| SPIB | NOP10   |
| SPIB | NOP2    |
| SPIB | NOP58   |
| SPIB | NOSIP   |
| SPIB | NPAT    |
| SPIB | NPEPPS  |
| SPIB | NPL0C4  |
| SPIB | NR1H2   |
| SPIB | NR2C2AP |
| SPIB | NR3C1   |
| SPIB | NR4A1   |
| SPIB | NR4A3   |
| SPIB | NRAS    |
| SPIB | NRBF2   |
| SPIB | NRDC    |
| SPIB | NREP    |
| SPIB | NSA2    |
| SPIB | NSF     |
| SPIB | NSMCE1  |
| SPIB | NSMCE4A |
| SPIB | NSUN5   |
| SPIB | NSUN6   |
| SPIB | NT5C    |
| SPIB | NT5C2   |
| SPIB | NTHL1   |

|      |        |
|------|--------|
| SPIB | NTMT1  |
| SPIB | NTPCR  |
| SPIB | NUB1   |
| SPIB | NUBP1  |
| SPIB | NUBP2  |
| SPIB | NUCKS1 |
| SPIB | NUDC   |
| SPIB | NUDCD2 |
| SPIB | NUDT1  |
| SPIB | NUDT16 |
| SPIB | NUDT17 |
| SPIB | NUDT21 |
| SPIB | NUDT3  |
| SPIB | NUDT5  |
| SPIB | NUFIP1 |
| SPIB | NUFIP2 |
| SPIB | NUMA1  |
| SPIB | NUMB   |
| SPIB | NUP107 |
| SPIB | NUP153 |
| SPIB | NUP155 |
| SPIB | NUP160 |
| SPIB | NUP205 |
| SPIB | NUP214 |
| SPIB | NUP35  |
| SPIB | NUP37  |
| SPIB | NUP54  |
| SPIB | NUP58  |
| SPIB | NUP93  |
| SPIB | NUTF2  |
| SPIB | NXPE3  |
| SPIB | NXT1   |
| SPIB | NXT2   |
| SPIB | OARD1  |
| SPIB | OAS1   |
| SPIB | OAZ2   |
| SPIB | OCIAD1 |
| SPIB | ODC1   |
| SPIB | ODF2   |
| SPIB | OFD1   |
| SPIB | OGFR   |
| SPIB | OGG1   |
| SPIB | OGT    |
| SPIB | OLA1   |
| SPIB | OMA1   |
| SPIB | OPA1   |
| SPIB | OPA3   |
| SPIB | ORAI1  |
| SPIB | ORAI2  |
| SPIB | ORAI3  |

|      |               |
|------|---------------|
| SPIB | ORC2          |
| SPIB | ORMDL1        |
| SPIB | ORMDL2        |
| SPIB | OSBP          |
| SPIB | OSBPL10       |
| SPIB | OSBPL11       |
| SPIB | OSBPL2        |
| SPIB | OSBPL8        |
| SPIB | OSBPL9        |
| SPIB | OSER1         |
| SPIB | OST4          |
| SPIB | OSTC          |
| SPIB | OSTF1         |
| SPIB | OSTM1         |
| SPIB | OTUB1         |
| SPIB | OTUD4         |
| SPIB | OTUD5         |
| SPIB | OTULIN        |
| SPIB | OXCT1         |
| SPIB | OXLD1         |
| SPIB | OXSR1         |
| SPIB | P2RX5         |
| SPIB | P2RX5-TAX1BP3 |
| SPIB | P4HA1         |
| SPIB | P4HB          |
| SPIB | PAAF1         |
| SPIB | PABPC1        |
| SPIB | PABPN1        |
| SPIB | PAC SIN2      |
| SPIB | PAC SIN3      |
| SPIB | PAFAH1B1      |
| SPIB | PAFAH1B3      |
| SPIB | PAG1          |
| SPIB | PAICS         |
| SPIB | PAIP2         |
| SPIB | PAK1          |
| SPIB | PAK1IP1       |
| SPIB | PAK2          |
| SPIB | PANK2         |
| SPIB | PANK3         |
| SPIB | PAPOLA        |
| SPIB | PAQR8         |
| SPIB | PARG          |
| SPIB | PARL          |
| SPIB | PARN          |
| SPIB | PARP10        |
| SPIB | PARP11        |
| SPIB | PARP12        |
| SPIB | PARP16        |
| SPIB | PARVG         |



|      |         |
|------|---------|
| SPIB | PASK    |
| SPIB | PATL1   |
| SPIB | PATZ1   |
| SPIB | PAWR    |
| SPIB | PAX5    |
| SPIB | PBXIP1  |
| SPIB | PCBP1   |
| SPIB | PCBP2   |
| SPIB | PCED1B  |
| SPIB | PCF11   |
| SPIB | PCGF5   |
| SPIB | PCM1    |
| SPIB | PCNP    |
| SPIB | PCNX4   |
| SPIB | PDAP1   |
| SPIB | PDCD1   |
| SPIB | PDCD10  |
| SPIB | PDCD2   |
| SPIB | PDCD6   |
| SPIB | PDCD6IP |
| SPIB | PDCD7   |
| SPIB | PDCL3   |
| SPIB | PDE12   |
| SPIB | PDGFD   |
| SPIB | PDHA1   |
| SPIB | PDIA3   |
| SPIB | PDLIM1  |
| SPIB | PDLIM2  |
| SPIB | PDLIM7  |
| SPIB | PDPK1   |
| SPIB | PDRG1   |
| SPIB | PDS5A   |
| SPIB | PDSS1   |
| SPIB | PDXDC1  |
| SPIB | PDZD11  |
| SPIB | PEA15   |
| SPIB | PEF1    |
| SPIB | PER2    |
| SPIB | PES1    |
| SPIB | PET100  |
| SPIB | PEX16   |
| SPIB | PEX2    |
| SPIB | PEX26   |
| SPIB | PEX5    |
| SPIB | PEX6    |
| SPIB | PFDN5   |
| SPIB | PFDN6   |
| SPIB | PFKP    |
| SPIB | PFN1    |
| SPIB | PFN2    |

|      |          |
|------|----------|
| SPIB | PGAM1    |
| SPIB | PGAM5    |
| SPIB | PGGT1B   |
| SPIB | PGK1     |
| SPIB | PGLS     |
| SPIB | PGM1     |
| SPIB | PGM2     |
| SPIB | PGP      |
| SPIB | PGS1     |
| SPIB | PHAX     |
| SPIB | PHB2     |
| SPIB | PHF11    |
| SPIB | PHF14    |
| SPIB | PHF20    |
| SPIB | PHF23    |
| SPIB | PHF3     |
| SPIB | PHF5A    |
| SPIB | PHF6     |
| SPIB | PHF8     |
| SPIB | PHLDB3   |
| SPIB | PHOSPH02 |
| SPIB | PHRF1    |
| SPIB | PHTF1    |
| SPIB | PHTF2    |
| SPIB | PI4KB    |
| SPIB | PIAS4    |
| SPIB | PIBF1    |
| SPIB | PICALM   |
| SPIB | PICK1    |
| SPIB | PIGB0S1  |
| SPIB | PIGC     |
| SPIB | PIGH     |
| SPIB | PIGQ     |
| SPIB | PIGU     |
| SPIB | PIGV     |
| SPIB | PIH1D1   |
| SPIB | PIK3AP1  |
| SPIB | PIK3C2A  |
| SPIB | PIK3CA   |
| SPIB | PIK3CD   |
| SPIB | PIK3R5   |
| SPIB | PIKFYVE  |
| SPIB | PIM1     |
| SPIB | PIM2     |
| SPIB | PIM3     |
| SPIB | PIN1     |
| SPIB | PIP5K1A  |
| SPIB | PIP5K1C  |
| SPIB | PISD     |
| SPIB | PITPNA   |

|      |            |
|------|------------|
| SPIB | PITPNA-AS1 |
| SPIB | PITPNC1    |
| SPIB | PITPNM1    |
| SPIB | PKIB       |
| SPIB | PKIG       |
| SPIB | PKM        |
| SPIB | PKN1       |
| SPIB | PLA2G15    |
| SPIB | PLAA       |
| SPIB | PLAGL1     |
| SPIB | PLCL2      |
| SPIB | PLEK       |
| SPIB | PLEKHA2    |
| SPIB | PLEKHA3    |
| SPIB | PLEKHG1    |
| SPIB | PLEKHG2    |
| SPIB | PLEKHJ1    |
| SPIB | PLEKH02    |
| SPIB | PLRG1      |
| SPIB | PLSCR1     |
| SPIB | PMAIP1     |
| SPIB | PMPCA      |
| SPIB | PMPCB      |
| SPIB | PMS1       |
| SPIB | PMS2       |
| SPIB | PMVK       |
| SPIB | PNISR      |
| SPIB | PNKP       |
| SPIB | PNN        |
| SPIB | PNP        |
| SPIB | PNPLA2     |
| SPIB | PNPLA4     |
| SPIB | PNPLA6     |
| SPIB | PNP0       |
| SPIB | PNRC2      |
| SPIB | POC1A      |
| SPIB | POGK       |
| SPIB | POGZ       |
| SPIB | POLA2      |
| SPIB | POLB       |
| SPIB | POLD3      |
| SPIB | POLD4      |
| SPIB | POLDIP2    |
| SPIB | POLDIP3    |
| SPIB | POLE4      |
| SPIB | POLG2      |
| SPIB | POLM       |
| SPIB | POLR1E     |
| SPIB | POLR2A     |
| SPIB | POLR2C     |

|      |          |
|------|----------|
| SPIB | P0LR2D   |
| SPIB | P0LR2F   |
| SPIB | P0LR2G   |
| SPIB | P0LR2H   |
| SPIB | P0LR2J   |
| SPIB | P0LR2K   |
| SPIB | P0LR3C   |
| SPIB | P0LR3E   |
| SPIB | P0LRMT   |
| SPIB | P0MC     |
| SPIB | P0MP     |
| SPIB | P0P4     |
| SPIB | P0P5     |
| SPIB | P0P7     |
| SPIB | POU2AF1  |
| SPIB | POU2F1   |
| SPIB | POU2F2   |
| SPIB | PPAN     |
| SPIB | PPHLN1   |
| SPIB | PPID     |
| SPIB | PPIF     |
| SPIB | PPIG     |
| SPIB | PPIH     |
| SPIB | PPIL1    |
| SPIB | PPIL2    |
| SPIB | PPM1A    |
| SPIB | PPM1B    |
| SPIB | PPM1G    |
| SPIB | PPM1M    |
| SPIB | PPM1N    |
| SPIB | PPME1    |
| SPIB | PPP1CA   |
| SPIB | PPP1CC   |
| SPIB | PPP1R11  |
| SPIB | PPP1R12A |
| SPIB | PPP1R14B |
| SPIB | PPP1R16A |
| SPIB | PPP1R16B |
| SPIB | PPP1R18  |
| SPIB | PPP1R35  |
| SPIB | PPP1R9B  |
| SPIB | PPP2R1A  |
| SPIB | PPP2R2A  |
| SPIB | PPP2R5A  |
| SPIB | PPP2R5C  |
| SPIB | PPP2R5E  |
| SPIB | PPP3CC   |
| SPIB | PPP4C    |
| SPIB | PPP4R3A  |
| SPIB | PPP4R3B  |

|      |           |
|------|-----------|
| SPIB | PPP6R1    |
| SPIB | PPTC7     |
| SPIB | PQLC1     |
| SPIB | PRCC      |
| SPIB | PRDM10    |
| SPIB | PRDM2     |
| SPIB | PRELID1   |
| SPIB | PRELID3B  |
| SPIB | PREP      |
| SPIB | PRKAA1    |
| SPIB | PRKACA    |
| SPIB | PRKACB    |
| SPIB | PRKAG1    |
| SPIB | PRKAR1A   |
| SPIB | PRKAR1B   |
| SPIB | PRKAR2A   |
| SPIB | PRKCB     |
| SPIB | PRKCD     |
| SPIB | PRKCE     |
| SPIB | PRKD2     |
| SPIB | PRKDC     |
| SPIB | PRMT1     |
| SPIB | PRMT2     |
| SPIB | PRMT3     |
| SPIB | PRMT6     |
| SPIB | PRMT9     |
| SPIB | PROSER3   |
| SPIB | PRPF18    |
| SPIB | PRPF19    |
| SPIB | PRPF3     |
| SPIB | PRPF31    |
| SPIB | PRPF38A   |
| SPIB | PRPF38B   |
| SPIB | PRPF4     |
| SPIB | PRPF40A   |
| SPIB | PRPF40B   |
| SPIB | PRPF4B    |
| SPIB | PRPF6     |
| SPIB | PRPF8     |
| SPIB | PRR13     |
| SPIB | PRR14     |
| SPIB | PRR7      |
| SPIB | PRRC2B    |
| SPIB | PRRC2C    |
| SPIB | PSEN1     |
| SPIB | PSIP1     |
| SPIB | PSMA1     |
| SPIB | PSMA3     |
| SPIB | PSMA3-AS1 |
| SPIB | PSMA4     |

|      |        |
|------|--------|
| SPIB | PSMA5  |
| SPIB | PSMA6  |
| SPIB | PSMA8  |
| SPIB | PSMB1  |
| SPIB | PSMB3  |
| SPIB | PSMB4  |
| SPIB | PSMB5  |
| SPIB | PSMB7  |
| SPIB | PSMB8  |
| SPIB | PSMC1  |
| SPIB | PSMC2  |
| SPIB | PSMC3  |
| SPIB | PSMC5  |
| SPIB | PSMC6  |
| SPIB | PSMD11 |
| SPIB | PSMD12 |
| SPIB | PSMD13 |
| SPIB | PSMD14 |
| SPIB | PSMD2  |
| SPIB | PSMD3  |
| SPIB | PSMD4  |
| SPIB | PSMD6  |
| SPIB | PSMD7  |
| SPIB | PSMD8  |
| SPIB | PSME1  |
| SPIB | PSME3  |
| SPIB | PSME4  |
| SPIB | PSMF1  |
| SPIB | PSMG3  |
| SPIB | PSMG4  |
| SPIB | PTAR1  |
| SPIB | PTBP1  |
| SPIB | PTBP3  |
| SPIB | PTDSS2 |
| SPIB | PTGES2 |
| SPIB | PTGES3 |
| SPIB | PTGR2  |
| SPIB | PTK2   |
| SPIB | PTK2B  |
| SPIB | PTMA   |
| SPIB | PTP4A2 |
| SPIB | PTP4A3 |
| SPIB | PTPN12 |
| SPIB | PTPN2  |
| SPIB | PTPN6  |
| SPIB | PTPN7  |
| SPIB | PTPN9  |
| SPIB | PTPRC  |
| SPIB | PTPRE  |
| SPIB | PTPRJ  |

|      |           |
|------|-----------|
| SPIB | PTRH1     |
| SPIB | PTRH2     |
| SPIB | PTRHD1    |
| SPIB | PTTG1     |
| SPIB | PUDP      |
| SPIB | PUF60     |
| SPIB | PUM1      |
| SPIB | PUM2      |
| SPIB | PURB      |
| SPIB | PUS1      |
| SPIB | PUS3      |
| SPIB | PUS7L     |
| SPIB | PVT1      |
| SPIB | PWP1      |
| SPIB | PXN       |
| SPIB | PYCARD    |
| SPIB | PYHIN1    |
| SPIB | PYM1      |
| SPIB | PYROXD1   |
| SPIB | QARS      |
| SPIB | QKI       |
| SPIB | QPCT      |
| SPIB | QRICH2    |
| SPIB | QSER1     |
| SPIB | R3HCC1L   |
| SPIB | R3HDM4    |
| SPIB | RAB11A    |
| SPIB | RAB11B    |
| SPIB | RAB11FIP1 |
| SPIB | RAB11FIP2 |
| SPIB | RAB14     |
| SPIB | RAB18     |
| SPIB | RAB1B     |
| SPIB | RAB21     |
| SPIB | RAB28     |
| SPIB | RAB2A     |
| SPIB | RAB30     |
| SPIB | RAB35     |
| SPIB | RAB3GAP2  |
| SPIB | RAB40C    |
| SPIB | RAB4B     |
| SPIB | RAB5A     |
| SPIB | RAB5B     |
| SPIB | RAB5C     |
| SPIB | RAB6A     |
| SPIB | RAB7A     |
| SPIB | RAB8A     |
| SPIB | RAB8B     |
| SPIB | RABEP1    |
| SPIB | RABEP2    |

|      |          |
|------|----------|
| SPIB | RABEPK   |
| SPIB | RABGAP1  |
| SPIB | RABGAP1L |
| SPIB | RABGGTB  |
| SPIB | RABL2A   |
| SPIB | RABL2B   |
| SPIB | RAC1     |
| SPIB | RAC2     |
| SPIB | RACK1    |
| SPIB | RAD1     |
| SPIB | RAD17    |
| SPIB | RAD18    |
| SPIB | RAD23A   |
| SPIB | RAD51AP1 |
| SPIB | RAD51C   |
| SPIB | RAE1     |
| SPIB | RALA     |
| SPIB | RALGAPB  |
| SPIB | RALY     |
| SPIB | RAN      |
| SPIB | RANBP1   |
| SPIB | RANBP9   |
| SPIB | RAP1A    |
| SPIB | RAP1B    |
| SPIB | RAP2B    |
| SPIB | RAP2C    |
| SPIB | RAPGEF1  |
| SPIB | RARA     |
| SPIB | RARS     |
| SPIB | RARS2    |
| SPIB | RASA1    |
| SPIB | RASA4    |
| SPIB | RASAL1   |
| SPIB | RASAL3   |
| SPIB | RASGRF1  |
| SPIB | RASGRP2  |
| SPIB | RASGRP3  |
| SPIB | RASSF1   |
| SPIB | RASSF2   |
| SPIB | RASSF3   |
| SPIB | RASSF6   |
| SPIB | RASSF7   |
| SPIB | RAVER1   |
| SPIB | RB1      |
| SPIB | RB1CC1   |
| SPIB | RBBP4    |
| SPIB | RBBP6    |
| SPIB | RBBP7    |
| SPIB | RBBP8    |
| SPIB | RBCK1    |



|      |        |
|------|--------|
| SPIB | RBL2   |
| SPIB | RBM14  |
| SPIB | RBM17  |
| SPIB | RBM19  |
| SPIB | RBM22  |
| SPIB | RBM23  |
| SPIB | RBM25  |
| SPIB | RBM27  |
| SPIB | RBM28  |
| SPIB | RBM3   |
| SPIB | RBM34  |
| SPIB | RBM38  |
| SPIB | RBM4   |
| SPIB | RBM42  |
| SPIB | RBM45  |
| SPIB | RBM6   |
| SPIB | RBM8A  |
| SPIB | RBMX   |
| SPIB | RBMX2  |
| SPIB | RC3H1  |
| SPIB | RCAN3  |
| SPIB | RCBTB1 |
| SPIB | RCBTB2 |
| SPIB | RCC1   |
| SPIB | RCC2   |
| SPIB | RCCD1  |
| SPIB | RCE1   |
| SPIB | RCHY1  |
| SPIB | RCL1   |
| SPIB | RCN1   |
| SPIB | RCN2   |
| SPIB | RCOR3  |
| SPIB | RCSD1  |
| SPIB | RECQL  |
| SPIB | RECQL5 |
| SPIB | REL    |
| SPIB | RELA   |
| SPIB | RELB   |
| SPIB | RELT   |
| SPIB | REPIN1 |
| SPIB | RER1   |
| SPIB | REST   |
| SPIB | REV1   |
| SPIB | REX04  |
| SPIB | RFC1   |
| SPIB | RFC2   |
| SPIB | RFC5   |
| SPIB | RFTN1  |
| SPIB | RFX1   |
| SPIB | RFX3   |

|      |          |
|------|----------|
| SPIB | RFX5     |
| SPIB | RFXANK   |
| SPIB | RGCC     |
| SPIB | RGP1     |
| SPIB | RGS10    |
| SPIB | RGS13    |
| SPIB | RGS14    |
| SPIB | RGS16    |
| SPIB | RGS19    |
| SPIB | RGS3     |
| SPIB | RHBDD1   |
| SPIB | RHBDF2   |
| SPIB | RHEB     |
| SPIB | RH0BTB2  |
| SPIB | RH0C     |
| SPIB | RH0F     |
| SPIB | RH0G     |
| SPIB | RH0H     |
| SPIB | RH0T2    |
| SPIB | RIC1     |
| SPIB | RIC3     |
| SPIB | RILPL2   |
| SPIB | RIMKLB   |
| SPIB | RIN3     |
| SPIB | RING1    |
| SPIB | RINL     |
| SPIB | RI0K1    |
| SPIB | RI0K3    |
| SPIB | RIPK2    |
| SPIB | RIT1     |
| SPIB | RMDN1    |
| SPIB | RMDN3    |
| SPIB | RMI2     |
| SPIB | RMND5B   |
| SPIB | RNASEH1  |
| SPIB | RNASEH2A |
| SPIB | RNASEH2B |
| SPIB | RNASEH2C |
| SPIB | RNF115   |
| SPIB | RNF121   |
| SPIB | RNF13    |
| SPIB | RNF138   |
| SPIB | RNF14    |
| SPIB | RNF141   |
| SPIB | RNF166   |
| SPIB | RNF167   |
| SPIB | RNF169   |
| SPIB | RNF170   |
| SPIB | RNF181   |
| SPIB | RNF19A   |

|      |         |
|------|---------|
| SPIB | RNF214  |
| SPIB | RNF220  |
| SPIB | RNF25   |
| SPIB | RNF34   |
| SPIB | RNF40   |
| SPIB | RNF41   |
| SPIB | RNF7    |
| SPIB | RNGTT   |
| SPIB | RNMT    |
| SPIB | RNPC3   |
| SPIB | RNPS1   |
| SPIB | ROCK1   |
| SPIB | ROCK2   |
| SPIB | ROM01   |
| SPIB | RPA2    |
| SPIB | RPE     |
| SPIB | RPF1    |
| SPIB | RPF2    |
| SPIB | RPIA    |
| SPIB | RPL10   |
| SPIB | RPL10A  |
| SPIB | RPL11   |
| SPIB | RPL12   |
| SPIB | RPL13A  |
| SPIB | RPL15   |
| SPIB | RPL17   |
| SPIB | RPL18   |
| SPIB | RPL18A  |
| SPIB | RPL19   |
| SPIB | RPL21   |
| SPIB | RPL22   |
| SPIB | RPL23   |
| SPIB | RPL23A  |
| SPIB | RPL26   |
| SPIB | RPL26L1 |
| SPIB | RPL27   |
| SPIB | RPL27A  |
| SPIB | RPL28   |
| SPIB | RPL29   |
| SPIB | RPL3    |
| SPIB | RPL30   |
| SPIB | RPL31   |
| SPIB | RPL32   |
| SPIB | RPL34   |
| SPIB | RPL35   |
| SPIB | RPL36   |
| SPIB | RPL36AL |
| SPIB | RPL37   |
| SPIB | RPL37A  |
| SPIB | RPL38   |

|      |          |
|------|----------|
| SPIB | RPL39    |
| SPIB | RPL4     |
| SPIB | RPL41    |
| SPIB | RPL6     |
| SPIB | RPL7     |
| SPIB | RPL7L1   |
| SPIB | RPL8     |
| SPIB | RPLP2    |
| SPIB | RPS10    |
| SPIB | RPS11    |
| SPIB | RPS12    |
| SPIB | RPS13    |
| SPIB | RPS14    |
| SPIB | RPS15    |
| SPIB | RPS16    |
| SPIB | RPS17    |
| SPIB | RPS18    |
| SPIB | RPS19    |
| SPIB | RPS19BP1 |
| SPIB | RPS20    |
| SPIB | RPS21    |
| SPIB | RPS25    |
| SPIB | RPS26    |
| SPIB | RPS27    |
| SPIB | RPS27A   |
| SPIB | RPS3     |
| SPIB | RPS3A    |
| SPIB | RPS4X    |
| SPIB | RPS4Y1   |
| SPIB | RPS5     |
| SPIB | RPS6     |
| SPIB | RPS6KA1  |
| SPIB | RPS6KA2  |
| SPIB | RPS6KA4  |
| SPIB | RPS6KC1  |
| SPIB | RPS7     |
| SPIB | RPSA     |
| SPIB | RRAGA    |
| SPIB | RRAS2    |
| SPIB | RRM2B    |
| SPIB | RRN3     |
| SPIB | RRP12    |
| SPIB | RRP15    |
| SPIB | RRP36    |
| SPIB | RRP9     |
| SPIB | RRS1     |
| SPIB | RSL1D1   |
| SPIB | RSL24D1  |
| SPIB | RSPRY1   |
| SPIB | RSU1     |

|      |            |
|------|------------|
| SPIB | RTCA       |
| SPIB | RTN4       |
| SPIB | RTP4       |
| SPIB | RUBCN      |
| SPIB | RUFY1      |
| SPIB | RUNDC1     |
| SPIB | RUNX3      |
| SPIB | RUVBL1     |
| SPIB | RUVBL2     |
| SPIB | RWDD1      |
| SPIB | RWDD4      |
| SPIB | RXRB       |
| SPIB | S100A10    |
| SPIB | S100A11    |
| SPIB | S100A4     |
| SPIB | S1PR4      |
| SPIB | SAMHD1     |
| SPIB | SAMM50     |
| SPIB | SAMSN1     |
| SPIB | SAP130     |
| SPIB | SAP18      |
| SPIB | SAP30      |
| SPIB | SAP30BP    |
| SPIB | SAR1B      |
| SPIB | SART1      |
| SPIB | SART3      |
| SPIB | SASH3      |
| SPIB | SASS6      |
| SPIB | SAT1       |
| SPIB | SAV1       |
| SPIB | SAYSD1     |
| SPIB | SBDS       |
| SPIB | SBF2-AS1   |
| SPIB | SBN02      |
| SPIB | SCAF1      |
| SPIB | SCAF11     |
| SPIB | SCAF4      |
| SPIB | SCAND1     |
| SPIB | SCFD1      |
| SPIB | SCFD2      |
| SPIB | SCIMP      |
| SPIB | SCMH1      |
| SPIB | SCNM1      |
| SPIB | SC01       |
| SPIB | SCRN1      |
| SPIB | SCRN3      |
| SPIB | SDAD1      |
| SPIB | SDCBP      |
| SPIB | SDCBP2-AS1 |
| SPIB | SDE2       |

|      |           |
|------|-----------|
| SPIB | SDHAF1    |
| SPIB | SDHAF2    |
| SPIB | SDHAF3    |
| SPIB | SDHB      |
| SPIB | SDHC      |
| SPIB | SDHD      |
| SPIB | SDR39U1   |
| SPIB | SDR42E1   |
| SPIB | SEC11A    |
| SPIB | SEC13     |
| SPIB | SEC14L1   |
| SPIB | SEC16A    |
| SPIB | SEC22B    |
| SPIB | SEC22C    |
| SPIB | SEC23B    |
| SPIB | SEC23IP   |
| SPIB | SEC61G    |
| SPIB | SECISBP2  |
| SPIB | SECISBP2L |
| SPIB | SEMA4A    |
| SPIB | SEMA7A    |
| SPIB | SENP1     |
| SPIB | SEPT2     |
| SPIB | SEPT6     |
| SPIB | SEPT7     |
| SPIB | SEPT9     |
| SPIB | SERBP1    |
| SPIB | SERP1     |
| SPIB | SERP2     |
| SPIB | SERPINA9  |
| SPIB | SERPINB8  |
| SPIB | SERTAD3   |
| SPIB | SESTD1    |
| SPIB | SET       |
| SPIB | SETBP1    |
| SPIB | SETD3     |
| SPIB | SETD4     |
| SPIB | SETD5     |
| SPIB | SETDB1    |
| SPIB | SF1       |
| SPIB | SF3A1     |
| SPIB | SF3A2     |
| SPIB | SF3A3     |
| SPIB | SF3B1     |
| SPIB | SF3B2     |
| SPIB | SF3B3     |
| SPIB | SF3B4     |
| SPIB | SF3B5     |
| SPIB | SF3B6     |
| SPIB | SFI1      |

|      |          |
|------|----------|
| SPIB | SFSWAP   |
| SPIB | SFT2D1   |
| SPIB | SFT2D2   |
| SPIB | SFXN1    |
| SPIB | SGMS1    |
| SPIB | SG01     |
| SPIB | SGPP2    |
| SPIB | SGSH     |
| SPIB | SGSM3    |
| SPIB | SGTA     |
| SPIB | SH2B1    |
| SPIB | SH2B2    |
| SPIB | SH2B3    |
| SPIB | SH2D3C   |
| SPIB | SH3BGRL  |
| SPIB | SH3BP1   |
| SPIB | SH3BP5   |
| SPIB | SH3GLB1  |
| SPIB | SH3KBP1  |
| SPIB | SH3TC1   |
| SPIB | SHC1     |
| SPIB | SHF      |
| SPIB | SHISA5   |
| SPIB | SHISA8   |
| SPIB | SHKBP1   |
| SPIB | SHMT2    |
| SPIB | SHQ1     |
| SPIB | SIAH2    |
| SPIB | SIGLEC10 |
| SPIB | SIN3A    |
| SPIB | SIPA1    |
| SPIB | SIPA1L3  |
| SPIB | SIRPA    |
| SPIB | SIRT3    |
| SPIB | SIRT6    |
| SPIB | SIRT7    |
| SPIB | SIT1     |
| SPIB | SKAP2    |
| SPIB | SKIL     |
| SPIB | SKIV2L   |
| SPIB | SLA      |
| SPIB | SLAMF6   |
| SPIB | SLC15A4  |
| SPIB | SLC16A1  |
| SPIB | SLC16A3  |
| SPIB | SLC1A5   |
| SPIB | SLC23A2  |
| SPIB | SLC25A1  |
| SPIB | SLC25A11 |
| SPIB | SLC25A13 |

|      |          |
|------|----------|
| SPIB | SLC25A14 |
| SPIB | SLC25A17 |
| SPIB | SLC25A19 |
| SPIB | SLC25A20 |
| SPIB | SLC25A25 |
| SPIB | SLC25A33 |
| SPIB | SLC25A38 |
| SPIB | SLC25A39 |
| SPIB | SLC25A4  |
| SPIB | SLC25A40 |
| SPIB | SLC25A46 |
| SPIB | SLC25A5  |
| SPIB | SLC25A51 |
| SPIB | SLC29A3  |
| SPIB | SLC2A5   |
| SPIB | SLC2A6   |
| SPIB | SLC30A9  |
| SPIB | SLC35A1  |
| SPIB | SLC35A2  |
| SPIB | SLC35A4  |
| SPIB | SLC35B2  |
| SPIB | SLC35B3  |
| SPIB | SLC35C2  |
| SPIB | SLC35E1  |
| SPIB | SLC37A1  |
| SPIB | SLC38A1  |
| SPIB | SLC38A5  |
| SPIB | SLC39A1  |
| SPIB | SLC39A11 |
| SPIB | SLC39A14 |
| SPIB | SLC43A1  |
| SPIB | SLC43A2  |
| SPIB | SLC43A3  |
| SPIB | SLC44A2  |
| SPIB | SLC50A1  |
| SPIB | SLC6A6   |
| SPIB | SLC9A3R1 |
| SPIB | SLC9A7   |
| SPIB | SLC04A1  |
| SPIB | SLF1     |
| SPIB | SLIRP    |
| SPIB | SLK      |
| SPIB | SLMAP    |
| SPIB | SLU7     |
| SPIB | SMAD2    |
| SPIB | SMAD3    |
| SPIB | SMAP1    |
| SPIB | SMAP2    |
| SPIB | SMARCA2  |
| SPIB | SMARCAD1 |



|      |          |
|------|----------|
| SPIB | SMARCAL1 |
| SPIB | SMARCC1  |
| SPIB | SMARCC2  |
| SPIB | SMARCD1  |
| SPIB | SMARCD2  |
| SPIB | SMARCE1  |
| SPIB | SMC1A    |
| SPIB | SMC3     |
| SPIB | SMCHD1   |
| SPIB | SMC04    |
| SPIB | SMG1     |
| SPIB | SMG7     |
| SPIB | SMIM12   |
| SPIB | SMIM14   |
| SPIB | SMIM15   |
| SPIB | SMIM19   |
| SPIB | SMIM20   |
| SPIB | SMIM7    |
| SPIB | SMNDC1   |
| SPIB | SMPD2    |
| SPIB | SMS      |
| SPIB | SMU1     |
| SPIB | SMUG1    |
| SPIB | SMYD2    |
| SPIB | SNAP23   |
| SPIB | SNAP29   |
| SPIB | SNAPC4   |
| SPIB | SNAPC5   |
| SPIB | SNF8     |
| SPIB | SNHG19   |
| SPIB | SNHG21   |
| SPIB | SNHG25   |
| SPIB | SNHG8    |
| SPIB | SNN      |
| SPIB | SNRNP200 |
| SPIB | SNRNP27  |
| SPIB | SNRNP35  |
| SPIB | SNRNP40  |
| SPIB | SNRNP48  |
| SPIB | SNRPA    |
| SPIB | SNRPA1   |
| SPIB | SNRPB    |
| SPIB | SNRPB2   |
| SPIB | SNRPD1   |
| SPIB | SNRPD2   |
| SPIB | SNRPE    |
| SPIB | SNRPF    |
| SPIB | SNRPG    |
| SPIB | SNRPN    |
| SPIB | SNTB2    |

|      |           |
|------|-----------|
| SPIB | SNU13     |
| SPIB | SNUPN     |
| SPIB | SNW1      |
| SPIB | SNX1      |
| SPIB | SNX10     |
| SPIB | SNX11     |
| SPIB | SNX19     |
| SPIB | SNX20     |
| SPIB | SNX3      |
| SPIB | SNX5      |
| SPIB | SNX8      |
| SPIB | SNX9      |
| SPIB | S0BP      |
| SPIB | S0CS1     |
| SPIB | S0D2      |
| SPIB | S0RL1     |
| SPIB | S0X4      |
| SPIB | S0X5      |
| SPIB | SP100     |
| SPIB | SP110     |
| SPIB | SP140     |
| SPIB | SP2       |
| SPIB | SPAG7     |
| SPIB | SPAG9     |
| SPIB | SPAST     |
| SPIB | SPATA33   |
| SPIB | SPATA5L1  |
| SPIB | SPECC1    |
| SPIB | SPECC1L   |
| SPIB | SPG21     |
| SPIB | SPHK2     |
| SPIB | SPI1      |
| SPIB | SPIB      |
| SPIB | SPIN2B    |
| SPIB | SPINT1    |
| SPIB | SPINT2    |
| SPIB | SPN       |
| SPIB | SP0N1     |
| SPIB | SP0P      |
| SPIB | SP0PL     |
| SPIB | SPPL2A    |
| SPIB | SPTAN1    |
| SPIB | SPTLC1    |
| SPIB | SPTLC2    |
| SPIB | SRD5A1    |
| SPIB | SREK1     |
| SPIB | SREK1IP1  |
| SPIB | SRP14     |
| SPIB | SRP14-AS1 |
| SPIB | SRP19     |

|      |          |
|------|----------|
| SPIB | SRP54    |
| SPIB | SRP68    |
| SPIB | SRP9     |
| SPIB | SRPK2    |
| SPIB | SRR      |
| SPIB | SRRM1    |
| SPIB | SRRM2    |
| SPIB | SRRT     |
| SPIB | SRSF1    |
| SPIB | SRSF10   |
| SPIB | SRSF2    |
| SPIB | SRSF3    |
| SPIB | SRSF4    |
| SPIB | SRSF5    |
| SPIB | SRSF6    |
| SPIB | SRSF7    |
| SPIB | SRSF9    |
| SPIB | SS18     |
| SPIB | SSBP1    |
| SPIB | SSBP4    |
| SPIB | SSFA2    |
| SPIB | SSH2     |
| SPIB | SSR2     |
| SPIB | SSSCA1   |
| SPIB | SSTR2    |
| SPIB | ST14     |
| SPIB | ST20     |
| SPIB | ST3GAL2  |
| SPIB | ST3GAL5  |
| SPIB | STAG2    |
| SPIB | STAMP    |
| SPIB | STAMBPL1 |
| SPIB | STAP1    |
| SPIB | STARD3NL |
| SPIB | STAT5A   |
| SPIB | STAT5B   |
| SPIB | STAT6    |
| SPIB | STAU1    |
| SPIB | STAU2    |
| SPIB | STIM2    |
| SPIB | STK11    |
| SPIB | STK16    |
| SPIB | STK24    |
| SPIB | STK26    |
| SPIB | STK4     |
| SPIB | STK40    |
| SPIB | STMN1    |
| SPIB | STOML2   |
| SPIB | STRADA   |
| SPIB | STRAP    |

|      |         |
|------|---------|
| SPIB | STRIP1  |
| SPIB | STRN4   |
| SPIB | STUB1   |
| SPIB | STX10   |
| SPIB | STX11   |
| SPIB | STX12   |
| SPIB | STX16   |
| SPIB | STX18   |
| SPIB | STX6    |
| SPIB | STX7    |
| SPIB | STXBP2  |
| SPIB | STXBP3  |
| SPIB | STYXL1  |
| SPIB | SUCLG1  |
| SPIB | SUDS3   |
| SPIB | SUGT1   |
| SPIB | SULF2   |
| SPIB | SUMF1   |
| SPIB | SUM01   |
| SPIB | SUN2    |
| SPIB | SUPT16H |
| SPIB | SUPT20H |
| SPIB | SUPT4H1 |
| SPIB | SUPT5H  |
| SPIB | SURF1   |
| SPIB | SURF4   |
| SPIB | SVBP    |
| SPIB | SWI5    |
| SPIB | SYAP1   |
| SPIB | SYF2    |
| SPIB | SYK     |
| SPIB | SYMPK   |
| SPIB | SYNCRIP |
| SPIB | SYNGR1  |
| SPIB | SYNGR2  |
| SPIB | SYPL1   |
| SPIB | SYS1    |
| SPIB | SYT11   |
| SPIB | SYT17   |
| SPIB | SYTL1   |
| SPIB | SZRD1   |
| SPIB | TAB3    |
| SPIB | TACC1   |
| SPIB | TAC01   |
| SPIB | TADA3   |
| SPIB | TAF1    |
| SPIB | TAF10   |
| SPIB | TAF11   |
| SPIB | TAF12   |
| SPIB | TAF15   |

|      |          |
|------|----------|
| SPIB | TAF1B    |
| SPIB | TAF2     |
| SPIB | TAF7     |
| SPIB | TAF9     |
| SPIB | TAGAP    |
| SPIB | TAGLN2   |
| SPIB | TALD01   |
| SPIB | TANG02   |
| SPIB | TANK     |
| SPIB | TA0K3    |
| SPIB | TARS2    |
| SPIB | TATDN1   |
| SPIB | TATDN3   |
| SPIB | TAX1BP1  |
| SPIB | TAX1BP3  |
| SPIB | TBC1D1   |
| SPIB | TBC1D10C |
| SPIB | TBC1D19  |
| SPIB | TBC1D22A |
| SPIB | TBC1D2B  |
| SPIB | TBC1D5   |
| SPIB | TBCC     |
| SPIB | TBCEL    |
| SPIB | TBK1     |
| SPIB | TBL1XR1  |
| SPIB | TBL3     |
| SPIB | TBPL1    |
| SPIB | TBRG1    |
| SPIB | TBRG4    |
| SPIB | TCEAL8   |
| SPIB | TCF25    |
| SPIB | TCF3     |
| SPIB | TCF4     |
| SPIB | TCIRG1   |
| SPIB | TCOF1    |
| SPIB | TCP1     |
| SPIB | TCP11L1  |
| SPIB | TCTA     |
| SPIB | TCTE3    |
| SPIB | TDG      |
| SPIB | TDP1     |
| SPIB | TDRD3    |
| SPIB | TDRD7    |
| SPIB | TEFM     |
| SPIB | TEL02    |
| SPIB | TESC     |
| SPIB | TESPA1   |
| SPIB | TEX10    |
| SPIB | TFAM     |
| SPIB | TFB1M    |

|      |             |
|------|-------------|
| SPIB | TFB2M       |
| SPIB | TFDP2       |
| SPIB | TFEB        |
| SPIB | TFIP11      |
| SPIB | TFRC        |
| SPIB | TGFB1       |
| SPIB | TGIF1       |
| SPIB | TGIF2       |
| SPIB | TGOLN2      |
| SPIB | TGS1        |
| SPIB | THAP1       |
| SPIB | THAP11      |
| SPIB | THAP4       |
| SPIB | THAP5       |
| SPIB | THEM6       |
| SPIB | THG1L       |
| SPIB | THOC2       |
| SPIB | THRAP3      |
| SPIB | THTPA       |
| SPIB | THUMPD2     |
| SPIB | THUMPD3     |
| SPIB | THUMPD3-AS1 |
| SPIB | TIAL1       |
| SPIB | TIFA        |
| SPIB | TIGAR       |
| SPIB | TIMM10      |
| SPIB | TIMM10B     |
| SPIB | TIMM17A     |
| SPIB | TIMM23      |
| SPIB | TIMM23B     |
| SPIB | TIMM8A      |
| SPIB | TIMM8B      |
| SPIB | TIMMDC1     |
| SPIB | TINF2       |
| SPIB | TIPARP      |
| SPIB | TIPRL       |
| SPIB | TKT         |
| SPIB | TLCD1       |
| SPIB | TLE1        |
| SPIB | TLE3        |
| SPIB | TLN1        |
| SPIB | TLR10       |
| SPIB | TM2D1       |
| SPIB | TM2D3       |
| SPIB | TMA7        |
| SPIB | TMBIM1      |
| SPIB | TMBIM4      |
| SPIB | TMC6        |
| SPIB | TMC8        |
| SPIB | TMC03       |

|      |              |
|------|--------------|
| SPIB | TMC04        |
| SPIB | TMED2        |
| SPIB | TMED3        |
| SPIB | TMED8        |
| SPIB | TMEM101      |
| SPIB | TMEM115      |
| SPIB | TMEM123      |
| SPIB | TMEM131      |
| SPIB | TMEM138      |
| SPIB | TMEM14A      |
| SPIB | TMEM154      |
| SPIB | TMEM156      |
| SPIB | TMEM161B-AS1 |
| SPIB | TMEM167A     |
| SPIB | TMEM18       |
| SPIB | TMEM186      |
| SPIB | TMEM199      |
| SPIB | TMEM230      |
| SPIB | TMEM231      |
| SPIB | TMEM243      |
| SPIB | TMEM245      |
| SPIB | TMEM248      |
| SPIB | TMEM251      |
| SPIB | TMEM258      |
| SPIB | TMEM259      |
| SPIB | TMEM267      |
| SPIB | TMEM41B      |
| SPIB | TMEM59       |
| SPIB | TMEM60       |
| SPIB | TMEM68       |
| SPIB | TMEM69       |
| SPIB | TMEM8A       |
| SPIB | TMEM9        |
| SPIB | TMEM94       |
| SPIB | TMEM9B       |
| SPIB | TMSB4X       |
| SPIB | TMUB1        |
| SPIB | TMX1         |
| SPIB | TNF          |
| SPIB | TNFAIP1      |
| SPIB | TNFAIP3      |
| SPIB | TNFAIP8      |
| SPIB | TNFAIP8L2    |
| SPIB | TNFRSF13B    |
| SPIB | TNFRSF13C    |
| SPIB | TNFRSF1B     |
| SPIB | TNIP1        |
| SPIB | TNKS2        |
| SPIB | TNP03        |
| SPIB | TNRC6A       |

|      |          |
|------|----------|
| SPIB | TNS3     |
| SPIB | TOE1     |
| SPIB | TOLLIP   |
| SPIB | TOMM20   |
| SPIB | TOMM22   |
| SPIB | TOMM40   |
| SPIB | TOMM5    |
| SPIB | TOMM7    |
| SPIB | TOP1     |
| SPIB | TOP1MT   |
| SPIB | TOR1A    |
| SPIB | TOR4A    |
| SPIB | TOX4     |
| SPIB | TP53     |
| SPIB | TP53I11  |
| SPIB | TP53RK   |
| SPIB | TP53TG1  |
| SPIB | TPCN1    |
| SPIB | TPD52L2  |
| SPIB | TPGS1    |
| SPIB | TPM3     |
| SPIB | TPM4     |
| SPIB | TPMT     |
| SPIB | TPP2     |
| SPIB | TPR      |
| SPIB | TPRKB    |
| SPIB | TPST2    |
| SPIB | TPX2     |
| SPIB | TRA2B    |
| SPIB | TRABD    |
| SPIB | TRADD    |
| SPIB | TRAF3    |
| SPIB | TRAF3IP1 |
| SPIB | TRAF4    |
| SPIB | TRAF5    |
| SPIB | TRAF7    |
| SPIB | TRAFD1   |
| SPIB | TRAK1    |
| SPIB | TRAM1    |
| SPIB | TRAPPC1  |
| SPIB | TRAPPC10 |
| SPIB | TRAPPC11 |
| SPIB | TRAPPC12 |
| SPIB | TRAPPC3  |
| SPIB | TRAPPC4  |
| SPIB | TRAPPC6A |
| SPIB | TRAPPC8  |
| SPIB | TRIB2    |
| SPIB | TRIM21   |
| SPIB | TRIM22   |



|      |          |
|------|----------|
| SPIB | TRIM27   |
| SPIB | TRIM56   |
| SPIB | TRIM61   |
| SPIB | TRIM8    |
| SPIB | TRIP12   |
| SPIB | TRM0     |
| SPIB | TRMT10A  |
| SPIB | TRMT10C  |
| SPIB | TRMT11   |
| SPIB | TRMT112  |
| SPIB | TRMT12   |
| SPIB | TRMT2A   |
| SPIB | TRMT6    |
| SPIB | TRMT61A  |
| SPIB | TRMT61B  |
| SPIB | TRNAU1AP |
| SPIB | TRNT1    |
| SPIB | TROVE2   |
| SPIB | TRPM4    |
| SPIB | TRPV2    |
| SPIB | TRUB2    |
| SPIB | TSC22D3  |
| SPIB | TSC22D4  |
| SPIB | TSEN34   |
| SPIB | TSG101   |
| SPIB | TSNAX    |
| SPIB | TSPAN14  |
| SPIB | TSPAN3   |
| SPIB | TSPAN31  |
| SPIB | TSPAN33  |
| SPIB | TSPAN4   |
| SPIB | TSP0     |
| SPIB | TSSC4    |
| SPIB | TSTD1    |
| SPIB | TTC1     |
| SPIB | TTC13    |
| SPIB | TTC14    |
| SPIB | TTC32    |
| SPIB | TTC37    |
| SPIB | TTC39C   |
| SPIB | TTC5     |
| SPIB | TTF1     |
| SPIB | TTF2     |
| SPIB | TTI2     |
| SPIB | TUBA1B   |
| SPIB | TUBB     |
| SPIB | TUBB2B   |
| SPIB | TUBB4B   |
| SPIB | TUBB6    |
| SPIB | TUBGCP2  |

|      |        |
|------|--------|
| SPIB | TUFM   |
| SPIB | TUSC2  |
| SPIB | TWF1   |
| SPIB | TWF2   |
| SPIB | TXN    |
| SPIB | TXN2   |
| SPIB | TXNDC9 |
| SPIB | TXNL1  |
| SPIB | TXNL4B |
| SPIB | TXNRD1 |
| SPIB | TYSND1 |
| SPIB | TYW1   |
| SPIB | TYW3   |
| SPIB | U2AF2  |
| SPIB | U2SURP |
| SPIB | UACA   |
| SPIB | UBA1   |
| SPIB | UBA2   |
| SPIB | UBA52  |
| SPIB | UBA6   |
| SPIB | UBAC1  |
| SPIB | UBAC2  |
| SPIB | UBALD1 |
| SPIB | UBALD2 |
| SPIB | UBAP2  |
| SPIB | UBAP2L |
| SPIB | UBB    |
| SPIB | UBC    |
| SPIB | UBE2A  |
| SPIB | UBE2C  |
| SPIB | UBE2D1 |
| SPIB | UBE2D2 |
| SPIB | UBE2D3 |
| SPIB | UBE2E1 |
| SPIB | UBE2E3 |
| SPIB | UBE2F  |
| SPIB | UBE2G1 |
| SPIB | UBE2G2 |
| SPIB | UBE2J2 |
| SPIB | UBE2L3 |
| SPIB | UBE2M  |
| SPIB | UBE2N  |
| SPIB | UBE2Q1 |
| SPIB | UBE2V2 |
| SPIB | UBE3A  |
| SPIB | UBFD1  |
| SPIB | UBL5   |
| SPIB | UBL7   |
| SPIB | UBLCP1 |
| SPIB | UBN1   |

|      |         |
|------|---------|
| SPIB | UBOX5   |
| SPIB | UBQLN2  |
| SPIB | UBR1    |
| SPIB | UBR2    |
| SPIB | UBR4    |
| SPIB | UBR5    |
| SPIB | UBTF    |
| SPIB | UBXN1   |
| SPIB | UCHL3   |
| SPIB | UCHL5   |
| SPIB | UCK1    |
| SPIB | UCP2    |
| SPIB | UFC1    |
| SPIB | UFM1    |
| SPIB | UFSP2   |
| SPIB | UGCG    |
| SPIB | UGGT2   |
| SPIB | UGP2    |
| SPIB | UHMK1   |
| SPIB | UIMC1   |
| SPIB | UMAD1   |
| SPIB | UMPS    |
| SPIB | UNC13D  |
| SPIB | UNC93B1 |
| SPIB | UPF2    |
| SPIB | UQCC2   |
| SPIB | UQCR11  |
| SPIB | UQCRC2  |
| SPIB | UQCRFS1 |
| SPIB | UQCRH   |
| SPIB | UQCRQ   |
| SPIB | URGCP   |
| SPIB | URI1    |
| SPIB | URM1    |
| SPIB | UR0S    |
| SPIB | USB1    |
| SPIB | USE1    |
| SPIB | USP1    |
| SPIB | USP12   |
| SPIB | USP16   |
| SPIB | USP19   |
| SPIB | USP36   |
| SPIB | USP38   |
| SPIB | USP39   |
| SPIB | USP4    |
| SPIB | USP48   |
| SPIB | USP7    |
| SPIB | USP9X   |
| SPIB | USPL1   |
| SPIB | UTP11   |

|      |         |
|------|---------|
| SPIB | UTP14A  |
| SPIB | UTP18   |
| SPIB | UTP23   |
| SPIB | UTP3    |
| SPIB | UTP4    |
| SPIB | UTP6    |
| SPIB | UXT     |
| SPIB | VAMP1   |
| SPIB | VAMP2   |
| SPIB | VAMP3   |
| SPIB | VAMP8   |
| SPIB | VARS    |
| SPIB | VASP    |
| SPIB | VAV1    |
| SPIB | VAV2    |
| SPIB | VCP     |
| SPIB | VDAC3   |
| SPIB | VEZF1   |
| SPIB | VGLL4   |
| SPIB | VHL     |
| SPIB | VIM     |
| SPIB | VIPAS39 |
| SPIB | VMA21   |
| SPIB | VOPP1   |
| SPIB | VPS11   |
| SPIB | VPS13A  |
| SPIB | VPS16   |
| SPIB | VPS18   |
| SPIB | VPS25   |
| SPIB | VPS26A  |
| SPIB | VPS33A  |
| SPIB | VPS39   |
| SPIB | VPS4A   |
| SPIB | VPS4B   |
| SPIB | VPS51   |
| SPIB | VPS72   |
| SPIB | VRK1    |
| SPIB | VRK3    |
| SPIB | VTA1    |
| SPIB | WAC     |
| SPIB | WAS     |
| SPIB | WASF2   |
| SPIB | WDFY4   |
| SPIB | WDR1    |
| SPIB | WDR11   |
| SPIB | WDR12   |
| SPIB | WDR3    |
| SPIB | WDR33   |
| SPIB | WDR34   |
| SPIB | WDR37   |

|      |            |
|------|------------|
| SPIB | WDR41      |
| SPIB | WDR43      |
| SPIB | WDR44      |
| SPIB | WDR46      |
| SPIB | WDR55      |
| SPIB | WDR61      |
| SPIB | WDR70      |
| SPIB | WDR73      |
| SPIB | WDR81      |
| SPIB | WDR82      |
| SPIB | WDR83      |
| SPIB | WDR830S    |
| SPIB | WDTC1      |
| SPIB | WDYHV1     |
| SPIB | WEE1       |
| SPIB | WIPF1      |
| SPIB | WIPF2      |
| SPIB | WNK1       |
| SPIB | WNT10A     |
| SPIB | WRAP53     |
| SPIB | WRAP73     |
| SPIB | WSB1       |
| SPIB | WSB2       |
| SPIB | WTAP       |
| SPIB | WVC3       |
| SPIB | WWP2       |
| SPIB | XAB2       |
| SPIB | XIAP       |
| SPIB | XPNPEP1    |
| SPIB | XP06       |
| SPIB | XRCC4      |
| SPIB | XRCC6      |
| SPIB | XRN2       |
| SPIB | XXYLT1     |
| SPIB | XXYLT1-AS2 |
| SPIB | YARS2      |
| SPIB | YBEY       |
| SPIB | YBX1       |
| SPIB | YEATS4     |
| SPIB | YIPF3      |
| SPIB | YIPF4      |
| SPIB | YME1L1     |
| SPIB | YPEL3      |
| SPIB | YPEL5      |
| SPIB | YRDC       |
| SPIB | YTHDC1     |
| SPIB | YTHDC2     |
| SPIB | YTHDF2     |
| SPIB | YTHDF3     |
| SPIB | YWHAB      |

|      |         |
|------|---------|
| SPIB | YWHAE   |
| SPIB | YWHAG   |
| SPIB | YWHAH   |
| SPIB | YWHAZ   |
| SPIB | YY1     |
| SPIB | ZBED5   |
| SPIB | ZBTB1   |
| SPIB | ZBTB17  |
| SPIB | ZBTB24  |
| SPIB | ZBTB25  |
| SPIB | ZBTB32  |
| SPIB | ZBTB45  |
| SPIB | ZBTB5   |
| SPIB | ZBTB7A  |
| SPIB | ZC3H10  |
| SPIB | ZC3H12A |
| SPIB | ZC3H12D |
| SPIB | ZC3H13  |
| SPIB | ZC3H14  |
| SPIB | ZC3H15  |
| SPIB | ZC3H18  |
| SPIB | ZC3H7A  |
| SPIB | ZC3HAV1 |
| SPIB | ZC3HC1  |
| SPIB | ZCCHC17 |
| SPIB | ZCCHC7  |
| SPIB | ZCCHC9  |
| SPIB | ZDHHC12 |
| SPIB | ZDHHC13 |
| SPIB | ZDHHC2  |
| SPIB | ZDHHC21 |
| SPIB | ZDHHC24 |
| SPIB | ZDHHC3  |
| SPIB | ZDHHC6  |
| SPIB | ZEB1    |
| SPIB | ZEB2    |
| SPIB | ZFAND3  |
| SPIB | ZFAND6  |
| SPIB | ZFAS1   |
| SPIB | ZFAT    |
| SPIB | ZFC3H1  |
| SPIB | ZFP1    |
| SPIB | ZFP36   |
| SPIB | ZFP36L1 |
| SPIB | ZFP82   |
| SPIB | ZFP91   |
| SPIB | ZFPL1   |
| SPIB | ZFX     |
| SPIB | ZFYVE16 |
| SPIB | ZFYVE27 |

|      |         |
|------|---------|
| SPIB | ZGRF1   |
| SPIB | ZKSCAN2 |
| SPIB | ZMAT2   |
| SPIB | ZMYND11 |
| SPIB | ZNF101  |
| SPIB | ZNF106  |
| SPIB | ZNF134  |
| SPIB | ZNF143  |
| SPIB | ZNF16   |
| SPIB | ZNF195  |
| SPIB | ZNF207  |
| SPIB | ZNF213  |
| SPIB | ZNF226  |
| SPIB | ZNF227  |
| SPIB | ZNF24   |
| SPIB | ZNF250  |
| SPIB | ZNF263  |
| SPIB | ZNF280D |
| SPIB | ZNF281  |
| SPIB | ZNF285  |
| SPIB | ZNF292  |
| SPIB | ZNF296  |
| SPIB | ZNF318  |
| SPIB | ZNF319  |
| SPIB | ZNF324B |
| SPIB | ZNF330  |
| SPIB | ZNF33A  |
| SPIB | ZNF35   |
| SPIB | ZNF354A |
| SPIB | ZNF394  |
| SPIB | ZNF408  |
| SPIB | ZNF480  |
| SPIB | ZNF480  |
| SPIB | ZNF511  |
| SPIB | ZNF512  |
| SPIB | ZNF514  |
| SPIB | ZNF580  |
| SPIB | ZNF584  |
| SPIB | ZNF593  |
| SPIB | ZNF608  |
| SPIB | ZNF644  |
| SPIB | ZNF655  |
| SPIB | ZNF668  |
| SPIB | ZNF672  |
| SPIB | ZNF687  |
| SPIB | ZNF720  |
| SPIB | ZNF721  |
| SPIB | ZNF746  |
| SPIB | ZNF775  |
| SPIB | ZNF791  |
| SPIB | ZNF792  |

|        |             |
|--------|-------------|
| SPIB   | ZNF800      |
| SPIB   | ZNF804A     |
| SPIB   | ZNF827      |
| SPIB   | ZNF880      |
| SPIB   | ZNFX1       |
| SPIB   | ZNHIT1      |
| SPIB   | ZP3         |
| SPIB   | ZPR1        |
| SPIB   | ZRANB2      |
| SPIB   | ZRSR2       |
| SPIB   | ZSCAN16     |
| SPIB   | ZSCAN16-AS1 |
| SPIB   | ZSCAN21     |
| SPIB   | ZSWIM6      |
| SPIB   | ZSWIM8      |
| SPIB   | ZWILCH      |
| SPIB   | ZYX         |
| SREBF1 | AEN         |
| SREBF1 | ATAD3B      |
| SREBF1 | BBC3        |
| SREBF1 | BRF2        |
| SREBF1 | CCND1       |
| SREBF1 | CLTC        |
| SREBF1 | DCP1A       |
| SREBF1 | EGR2        |
| SREBF1 | IFT22       |
| SREBF1 | KDM6B       |
| SREBF1 | MSL1        |
| SREBF1 | NEK11       |
| SREBF1 | NF1         |
| SREBF1 | NOL9        |
| SREBF1 | NOM1        |
| SREBF1 | POLG2       |
| SREBF1 | PSEN1       |
| SREBF1 | RARA        |
| SREBF1 | SARNP       |
| SREBF1 | SEMA7A      |
| SREBF1 | SREBF1      |
| SREBF1 | TCF7        |
| SREBF1 | TNFRSF10B   |
| SREBF1 | TRAF1       |
| SREBF1 | UBC         |
| SREBF1 | VIM-AS1     |
| SREBF1 | VPS37B      |
| SREBF1 | YME1L1      |
| SREBF1 | YY1AP1      |
| SREBF1 | ZFAS1       |
| SREBF1 | ZMPSTE24    |
| SREBF2 | ABL2        |
| SREBF2 | ACADSB      |



SREBF2 ACAT2  
SREBF2 ACTG1  
SREBF2 ADAM19  
SREBF2 ADARB1  
SREBF2 AHCYL1  
SREBF2 AIFM1  
SREBF2 AKT1  
SREBF2 ALG3  
SREBF2 AMDHD2  
SREBF2 AMIG02  
SREBF2 ANKRD13A  
SREBF2 ANKRD13D  
SREBF2 ANKRD46  
SREBF2 AQP3  
SREBF2 ARF5  
SREBF2 ARF6  
SREBF2 ARHGAP30  
SREBF2 ARMCX3  
SREBF2 ARPC1B  
SREBF2 ASAH1  
SREBF2 ASB1  
SREBF2 ATP6V0D1  
SREBF2 ATP6V1G1  
SREBF2 ATXN2L  
SREBF2 ATXN7L3B  
SREBF2 AZI2  
SREBF2 B3GLCT  
SREBF2 BAIAP2L1  
SREBF2 BEX4  
SREBF2 BIRC6  
SREBF2 BLOC1S5  
SREBF2 BPHL  
SREBF2 BRD3  
SREBF2 BTBD7  
SREBF2 C12orf43  
SREBF2 C19orf38  
SREBF2 C1orf43  
SREBF2 C21orf58  
SREBF2 CAD  
SREBF2 CALCOC02  
SREBF2 CAPN1  
SREBF2 CASP2  
SREBF2 CBFA2T2  
SREBF2 CCDC107  
SREBF2 CCDC15  
SREBF2 CCDC171  
SREBF2 CCDC28A  
SREBF2 CCDC43  
SREBF2 CCNB1IP1  
SREBF2 CCNE1

|        |         |
|--------|---------|
| SREBF2 | CD164   |
| SREBF2 | CD180   |
| SREBF2 | CD22    |
| SREBF2 | CD52    |
| SREBF2 | CD53    |
| SREBF2 | CD74    |
| SREBF2 | CDK12   |
| SREBF2 | CENPBD1 |
| SREBF2 | CHCHD10 |
| SREBF2 | CHD2    |
| SREBF2 | CIRBP   |
| SREBF2 | CLCN6   |
| SREBF2 | CLK2    |
| SREBF2 | CLNS1A  |
| SREBF2 | CMTM6   |
| SREBF2 | CNOT4   |
| SREBF2 | COG2    |
| SREBF2 | COR01A  |
| SREBF2 | CPNE5   |
| SREBF2 | CREB3   |
| SREBF2 | CSNK1G2 |
| SREBF2 | CTSH    |
| SREBF2 | CUL4A   |
| SREBF2 | DDX23   |
| SREBF2 | DDX3Y   |
| SREBF2 | DDX5    |
| SREBF2 | DENND1B |
| SREBF2 | DENND4A |
| SREBF2 | DHPS    |
| SREBF2 | DIAPH1  |
| SREBF2 | DMD     |
| SREBF2 | DNAJC14 |
| SREBF2 | DRAM2   |
| SREBF2 | DUSP4   |
| SREBF2 | EAPP    |
| SREBF2 | EEF1A1  |
| SREBF2 | EEF2    |
| SREBF2 | EIF3H   |
| SREBF2 | ERP44   |
| SREBF2 | ESC02   |
| SREBF2 | ESYT1   |
| SREBF2 | ETHE1   |
| SREBF2 | EVC2    |
| SREBF2 | EXT1    |
| SREBF2 | FAM129A |
| SREBF2 | FAM81A  |
| SREBF2 | FAS     |
| SREBF2 | FAU     |
| SREBF2 | FBX046  |
| SREBF2 | FCER2   |

|        |         |
|--------|---------|
| SREBF2 | FDFT1   |
| SREBF2 | FGFR10P |
| SREBF2 | FLVCR1  |
| SREBF2 | FN3KRP  |
| SREBF2 | FRAT2   |
| SREBF2 | GAB1    |
| SREBF2 | GABARAP |
| SREBF2 | GAK     |
| SREBF2 | GATAD2A |
| SREBF2 | GATAD2B |
| SREBF2 | GBE1    |
| SREBF2 | GIPC1   |
| SREBF2 | GLMP    |
| SREBF2 | GNA13   |
| SREBF2 | GPSM3   |
| SREBF2 | GPX4    |
| SREBF2 | GRINA   |
| SREBF2 | GRK5    |
| SREBF2 | HECW2   |
| SREBF2 | HEXA    |
| SREBF2 | HGSNAT  |
| SREBF2 | HK1     |
| SREBF2 | HLA-DRA |
| SREBF2 | HMGCS1  |
| SREBF2 | HOMER2  |
| SREBF2 | HVCN1   |
| SREBF2 | IDI1    |
| SREBF2 | IL2RG   |
| SREBF2 | INTS6   |
| SREBF2 | INTS6L  |
| SREBF2 | JDP2    |
| SREBF2 | JUP     |
| SREBF2 | KAT8    |
| SREBF2 | KATNB1  |
| SREBF2 | KCNN4   |
| SREBF2 | KCTD9   |
| SREBF2 | KIF15   |
| SREBF2 | KLHL5   |
| SREBF2 | KRCC1   |
| SREBF2 | L3MBTL2 |
| SREBF2 | LAGE3   |
| SREBF2 | LAPTM5  |
| SREBF2 | LAT2    |
| SREBF2 | LGALS3  |
| SREBF2 | LIMK1   |
| SREBF2 | LMAN2L  |
| SREBF2 | LMBRD2  |
| SREBF2 | LPAR5   |
| SREBF2 | LPIN1   |
| SREBF2 | LSS     |

SREBF2 LUC7L2  
SREBF2 LY9  
SREBF2 LYSMD2  
SREBF2 LYST  
SREBF2 MADD  
SREBF2 MANEA  
SREBF2 MAP1B  
SREBF2 MAP3K14  
SREBF2 MAP3K7CL  
SREBF2 MARCKSL1  
SREBF2 MAT2A  
SREBF2 MBP  
SREBF2 MBTD1  
SREBF2 MED1  
SREBF2 MED13  
SREBF2 MED31  
SREBF2 METTL9  
SREBF2 MKRN1  
SREBF2 MS4A1  
SREBF2 MSM01  
SREBF2 MSMP  
SREBF2 MTIF2  
SREBF2 MTSS1  
SREBF2 MVB12A  
SREBF2 MYCBP2  
SREBF2 MYL12B  
SREBF2 NBN  
SREBF2 NDRG3  
SREBF2 NDUFS2  
SREBF2 NEK6  
SREBF2 NELFB  
SREBF2 NFS1  
SREBF2 NINJ2  
SREBF2 NIT1  
SREBF2 NKIRAS2  
SREBF2 NLRX1  
SREBF2 NMNAT3  
SREBF2 NRBF2  
SREBF2 NRR0S  
SREBF2 NSF  
SREBF2 NT5DC3  
SREBF2 NUDT4  
SREBF2 NUGGC  
SREBF2 NUMA1  
SREBF2 NUP205  
SREBF2 NUP43  
SREBF2 OCEL1  
SREBF2 ORAI3  
SREBF2 OSBPL10-AS1  
SREBF2 PAFAH1B3

|        |           |
|--------|-----------|
| SREBF2 | PAN2      |
| SREBF2 | PCSK7     |
| SREBF2 | PCY0X1L   |
| SREBF2 | PDHB      |
| SREBF2 | PDS5B     |
| SREBF2 | PI4K2B    |
| SREBF2 | PIGW      |
| SREBF2 | PLCG2     |
| SREBF2 | PLEKHF2   |
| SREBF2 | PNPLA2    |
| SREBF2 | POLL      |
| SREBF2 | PPP1R37   |
| SREBF2 | PPP4R3B   |
| SREBF2 | PRDX1     |
| SREBF2 | PREX1     |
| SREBF2 | PRKCI     |
| SREBF2 | PSMB4     |
| SREBF2 | PTK2      |
| SREBF2 | PTPN23    |
| SREBF2 | PTPN6     |
| SREBF2 | PURA      |
| SREBF2 | RAB11FIP1 |
| SREBF2 | RAB14     |
| SREBF2 | RALGAPB   |
| SREBF2 | RANBP2    |
| SREBF2 | RBM25     |
| SREBF2 | RBM47     |
| SREBF2 | REST      |
| SREBF2 | RFX2      |
| SREBF2 | RFXAP     |
| SREBF2 | RGS16     |
| SREBF2 | RHOT1     |
| SREBF2 | RIC3      |
| SREBF2 | RIN3      |
| SREBF2 | RMDN3     |
| SREBF2 | RMND5B    |
| SREBF2 | RNF111    |
| SREBF2 | RNF138    |
| SREBF2 | RNH1      |
| SREBF2 | RPL21     |
| SREBF2 | RPL28     |
| SREBF2 | RPLP2     |
| SREBF2 | RPS19     |
| SREBF2 | RPS27     |
| SREBF2 | RPS28     |
| SREBF2 | S1PR1     |
| SREBF2 | SCIMP     |
| SREBF2 | SEPT11    |
| SREBF2 | SFSWAP    |
| SREBF2 | SGMS1     |

|        |          |
|--------|----------|
| SREBF2 | SGSM3    |
| SREBF2 | SIAH1    |
| SREBF2 | SIRT5    |
| SREBF2 | SKAP2    |
| SREBF2 | SKIV2L   |
| SREBF2 | SLC10A3  |
| SREBF2 | SLC23A2  |
| SREBF2 | SLC35F5  |
| SREBF2 | SLC37A4  |
| SREBF2 | SLC44A2  |
| SREBF2 | SLC6A6   |
| SREBF2 | SMAD5    |
| SREBF2 | SMAD7    |
| SREBF2 | SMARCC2  |
| SREBF2 | SMARCD2  |
| SREBF2 | SMCHD1   |
| SREBF2 | SMG7     |
| SREBF2 | SNAPC2   |
| SREBF2 | SNX13    |
| SREBF2 | SNX25    |
| SREBF2 | SOCS4    |
| SREBF2 | SPRED2   |
| SREBF2 | SPTLC1   |
| SREBF2 | SQLE     |
| SREBF2 | SREBF2   |
| SREBF2 | STAG2    |
| SREBF2 | STK11    |
| SREBF2 | STK25    |
| SREBF2 | STX10    |
| SREBF2 | STX16    |
| SREBF2 | STX5     |
| SREBF2 | STXBP2   |
| SREBF2 | SUCLA2   |
| SREBF2 | SUGP1    |
| SREBF2 | SUPT20H  |
| SREBF2 | SUPT4H1  |
| SREBF2 | SYS1     |
| SREBF2 | SYT11    |
| SREBF2 | TAX1BP1  |
| SREBF2 | TBC1D10C |
| SREBF2 | TCAF1    |
| SREBF2 | TCIRG1   |
| SREBF2 | TCOF1    |
| SREBF2 | TEFM     |
| SREBF2 | TERF2    |
| SREBF2 | TFRC     |
| SREBF2 | THUMPD2  |
| SREBF2 | TICAM1   |
| SREBF2 | TMED8    |
| SREBF2 | TMEM38B  |

|        |           |
|--------|-----------|
| SREBF2 | TMEM63A   |
| SREBF2 | TMSB4X    |
| SREBF2 | TNFRSF13C |
| SREBF2 | TOMM20    |
| SREBF2 | TOPBP1    |
| SREBF2 | TPP1      |
| SREBF2 | TRAM2     |
| SREBF2 | TRAPPC1   |
| SREBF2 | TRIM11    |
| SREBF2 | TSC22D4   |
| SREBF2 | TSTD1     |
| SREBF2 | TTC3      |
| SREBF2 | TTI1      |
| SREBF2 | TUBGCP4   |
| SREBF2 | TWF2      |
| SREBF2 | UBE2B     |
| SREBF2 | UGDH      |
| SREBF2 | USF2      |
| SREBF2 | USP3      |
| SREBF2 | UTY       |
| SREBF2 | VAMP2     |
| SREBF2 | VASP      |
| SREBF2 | VPS26A    |
| SREBF2 | VPS33B    |
| SREBF2 | VPS35     |
| SREBF2 | WAC       |
| SREBF2 | WASF2     |
| SREBF2 | WDCP      |
| SREBF2 | WDFY1     |
| SREBF2 | YIPF1     |
| SREBF2 | YWHAZ     |
| SREBF2 | ZBTB1     |
| SREBF2 | ZBTB44    |
| SREBF2 | ZC3H12D   |
| SREBF2 | ZFAND5    |
| SREBF2 | ZFP36L1   |
| SREBF2 | ZKSCAN8   |
| SREBF2 | ZMAT3     |
| SREBF2 | ZMYM5     |
| SREBF2 | ZMYND19   |
| SREBF2 | ZNF428    |
| SREBF2 | ZNF48     |
| SREBF2 | ZNF655    |
| SREBF2 | ZNF668    |
| SREBF2 | ZSCAN30   |
| SREBF2 | ZWILCH    |
| SRF    | AAAS      |
| SRF    | ANTXR2    |
| SRF    | APH1A     |
| SRF    | ARFGAP1   |

|     |          |
|-----|----------|
| SRF | ASAP1    |
| SRF | ASPSCR1  |
| SRF | ATF5     |
| SRF | CCDC50   |
| SRF | CDC34    |
| SRF | CLMN     |
| SRF | CNN3     |
| SRF | CN0T8    |
| SRF | COX10    |
| SRF | CUL1     |
| SRF | DDIT3    |
| SRF | DENND4B  |
| SRF | DHX30    |
| SRF | DOCK10   |
| SRF | EFHD2    |
| SRF | EIF2B2   |
| SRF | ENTHD1   |
| SRF | FAM199X  |
| SRF | FAM78A   |
| SRF | GCH1     |
| SRF | GOLGA3   |
| SRF | GPM6B    |
| SRF | GRIPAP1  |
| SRF | GTF3C2   |
| SRF | HCCS     |
| SRF | HOXB4    |
| SRF | IFNGR1   |
| SRF | ITPR3    |
| SRF | JOSD2    |
| SRF | KHSRP    |
| SRF | LHFPL2   |
| SRF | MAD2L1BP |
| SRF | MSL1     |
| SRF | MSN      |
| SRF | MTF1     |
| SRF | MXI1     |
| SRF | NAB1     |
| SRF | NEDD1    |
| SRF | NEK6     |
| SRF | NPAT     |
| SRF | NSF      |
| SRF | NUDCD3   |
| SRF | PDSS1    |
| SRF | PKN1     |
| SRF | PNOC     |
| SRF | PPME1    |
| SRF | PRPF19   |
| SRF | PTPN9    |
| SRF | RABGGTB  |
| SRF | RGS19    |



|       |            |
|-------|------------|
| SRF   | RPRD1A     |
| SRF   | SETBP1     |
| SRF   | SLC25A22   |
| SRF   | SLC43A1    |
| SRF   | SMCR5      |
| SRF   | SNHG7      |
| SRF   | SQSTM1     |
| SRF   | SRF        |
| SRF   | SSBP4      |
| SRF   | STX16      |
| SRF   | TAF15      |
| SRF   | TAOK3      |
| SRF   | TCF12      |
| SRF   | THADA      |
| SRF   | TMEM216    |
| SRF   | TMEM223    |
| SRF   | TSC2       |
| SRF   | UBTF       |
| SRF   | VEGFA      |
| SRF   | VTI1A      |
| SRF   | WDR24      |
| SRF   | YIPF1      |
| SRF   | ZBTB25     |
| SRF   | ZBTB7B     |
| SRF   | ZNF502     |
| SRF   | ZNF644     |
| STAT1 | ABCB4      |
| STAT1 | ABCF3      |
| STAT1 | ACAA1      |
| STAT1 | ACSF2      |
| STAT1 | ADCY3      |
| STAT1 | ADIPOR2    |
| STAT1 | ADPGK      |
| STAT1 | AFF3       |
| STAT1 | AIF1       |
| STAT1 | AKAP13     |
| STAT1 | ALAD       |
| STAT1 | ANKRD10    |
| STAT1 | ANKRD27    |
| STAT1 | APH1B      |
| STAT1 | APOBEC3G   |
| STAT1 | AREG       |
| STAT1 | ARF3       |
| STAT1 | ARHGAP24   |
| STAT1 | ARRB2      |
| STAT1 | ARRDC1-AS1 |
| STAT1 | ARSA       |
| STAT1 | ATL1       |
| STAT1 | ATP13A1    |
| STAT1 | B2M        |

|       |           |
|-------|-----------|
| STAT1 | B3GNT2    |
| STAT1 | BAG4      |
| STAT1 | BBX       |
| STAT1 | BCAR3     |
| STAT1 | BCKDHB    |
| STAT1 | BIRC3     |
| STAT1 | BLCAP     |
| STAT1 | BOLA2B    |
| STAT1 | BORCS6    |
| STAT1 | BR0X      |
| STAT1 | BST2      |
| STAT1 | C15orf39  |
| STAT1 | C19orf66  |
| STAT1 | C1GALT1C1 |
| STAT1 | C3orf52   |
| STAT1 | CAPN7     |
| STAT1 | CASC3     |
| STAT1 | CASP7     |
| STAT1 | CBR1      |
| STAT1 | CCDC125   |
| STAT1 | CCDC88A   |
| STAT1 | CCR10     |
| STAT1 | CD164     |
| STAT1 | CD38      |
| STAT1 | CD47      |
| STAT1 | CD59      |
| STAT1 | CD63      |
| STAT1 | CD68      |
| STAT1 | CEPT1     |
| STAT1 | CGRRF1    |
| STAT1 | CHAC1     |
| STAT1 | CHD2      |
| STAT1 | CHMP5     |
| STAT1 | CHPF      |
| STAT1 | CHST2     |
| STAT1 | CKAP4     |
| STAT1 | CLASRP    |
| STAT1 | CMPK2     |
| STAT1 | CNDP2     |
| STAT1 | COG8      |
| STAT1 | COX5A     |
| STAT1 | CPXM1     |
| STAT1 | CRTC2     |
| STAT1 | CSPP1     |
| STAT1 | CTBS      |
| STAT1 | CTDSP2    |
| STAT1 | CTSA      |
| STAT1 | CXXC5     |
| STAT1 | CYB5R4    |
| STAT1 | CYTH1     |

|       |         |
|-------|---------|
| STAT1 | DAPP1   |
| STAT1 | DDIT3   |
| STAT1 | DDX58   |
| STAT1 | DDX60L  |
| STAT1 | DLAT    |
| STAT1 | DLST    |
| STAT1 | DMD     |
| STAT1 | DNAJB14 |
| STAT1 | DNAJC3  |
| STAT1 | DNASE2  |
| STAT1 | DRAP1   |
| STAT1 | DYNLT1  |
| STAT1 | DYRK1B  |
| STAT1 | EDEM2   |
| STAT1 | EIF2AK2 |
| STAT1 | EPSTI1  |
| STAT1 | ERAP1   |
| STAT1 | ER01A   |
| STAT1 | ER01B   |
| STAT1 | ERP44   |
| STAT1 | ESRRA   |
| STAT1 | ETHE1   |
| STAT1 | ETV7    |
| STAT1 | FADS2   |
| STAT1 | FAM3C   |
| STAT1 | FBXL5   |
| STAT1 | FBX06   |
| STAT1 | FICD    |
| STAT1 | FKBP2   |
| STAT1 | FLNA    |
| STAT1 | FOXO3   |
| STAT1 | FPGS    |
| STAT1 | GANAB   |
| STAT1 | GATM    |
| STAT1 | GBP1    |
| STAT1 | GBP2    |
| STAT1 | GBP4    |
| STAT1 | GEN1    |
| STAT1 | GIMAP2  |
| STAT1 | GMPPA   |
| STAT1 | GORASP2 |
| STAT1 | GPR146  |
| STAT1 | GPX7    |
| STAT1 | GRINA   |
| STAT1 | GRN     |
| STAT1 | GSN     |
| STAT1 | HEBP1   |
| STAT1 | HERC5   |
| STAT1 | HERC6   |
| STAT1 | HEXIM2  |

|       |           |
|-------|-----------|
| STAT1 | HIP1      |
| STAT1 | HIST1H4H  |
| STAT1 | HLA-A     |
| STAT1 | HLA-B     |
| STAT1 | HLA-DRB5  |
| STAT1 | HLA-F     |
| STAT1 | HM13      |
| STAT1 | HMGCS1    |
| STAT1 | HSPA13    |
| STAT1 | IARS      |
| STAT1 | IFI16     |
| STAT1 | IFI35     |
| STAT1 | IFI6      |
| STAT1 | IFIT1     |
| STAT1 | IFIT2     |
| STAT1 | IFIT3     |
| STAT1 | IFITM2    |
| STAT1 | IGF2R     |
| STAT1 | IGFBP4    |
| STAT1 | IGFLR1    |
| STAT1 | IKBKG     |
| STAT1 | IL15RA    |
| STAT1 | IL2RG     |
| STAT1 | IMPACT    |
| STAT1 | INTS3     |
| STAT1 | IRF1      |
| STAT1 | IRF7      |
| STAT1 | IRF9      |
| STAT1 | ISG15     |
| STAT1 | ISG20     |
| STAT1 | ITM2B     |
| STAT1 | JAM2      |
| STAT1 | JMY       |
| STAT1 | KAT6B     |
| STAT1 | KCNN3     |
| STAT1 | KLHL14    |
| STAT1 | KRT18     |
| STAT1 | LANCL1    |
| STAT1 | LAP3      |
| STAT1 | LGALS9    |
| STAT1 | LINC00665 |
| STAT1 | LMAN2     |
| STAT1 | LTA4H     |
| STAT1 | LTC4S     |
| STAT1 | LY6E      |
| STAT1 | MACROD2   |
| STAT1 | MANEA     |
| STAT1 | MAP3K11   |
| STAT1 | MAP3K13   |
| STAT1 | MCL1      |

|       |           |
|-------|-----------|
| STAT1 | MCTP2     |
| STAT1 | MED24     |
| STAT1 | METTTL7A  |
| STAT1 | MIDN      |
| STAT1 | MILR1     |
| STAT1 | MORF4L2   |
| STAT1 | MPHOSPH10 |
| STAT1 | MRPL44    |
| STAT1 | MRPS31    |
| STAT1 | MX1       |
| STAT1 | MX2       |
| STAT1 | MYD88     |
| STAT1 | MYDGF     |
| STAT1 | MZB1      |
| STAT1 | N4BP2L1   |
| STAT1 | NCKAP1L   |
| STAT1 | NCOA7     |
| STAT1 | NDST2     |
| STAT1 | NEK8      |
| STAT1 | NFIC      |
| STAT1 | NIT2      |
| STAT1 | NMI       |
| STAT1 | NOB1      |
| STAT1 | NPHP3     |
| STAT1 | NT5C3A    |
| STAT1 | NUB1      |
| STAT1 | OAS1      |
| STAT1 | OAS2      |
| STAT1 | OAS3      |
| STAT1 | OGDH      |
| STAT1 | OTUD1     |
| STAT1 | P2RX1     |
| STAT1 | P4HA1     |
| STAT1 | PARP12    |
| STAT1 | PDE4DIP   |
| STAT1 | PDIA5     |
| STAT1 | PDK1      |
| STAT1 | PDLIM1    |
| STAT1 | PGRMC2    |
| STAT1 | PHF11     |
| STAT1 | PHPT1     |
| STAT1 | PI4KB     |
| STAT1 | PIAS3     |
| STAT1 | PIGT      |
| STAT1 | PIK3AP1   |
| STAT1 | PLD3      |
| STAT1 | PLD4      |
| STAT1 | PLEKHA2   |
| STAT1 | PLTP      |
| STAT1 | POLE2     |

|       |           |
|-------|-----------|
| STAT1 | PPIL2     |
| STAT1 | PPM1K     |
| STAT1 | PPP2R2A   |
| STAT1 | PRDX4     |
| STAT1 | PSMB9     |
| STAT1 | PSME1     |
| STAT1 | PSME2     |
| STAT1 | QPCT      |
| STAT1 | RAB1A     |
| STAT1 | RAB1B     |
| STAT1 | RAB29     |
| STAT1 | RAB5A     |
| STAT1 | RABGAP1L  |
| STAT1 | RASA4     |
| STAT1 | RASSF5    |
| STAT1 | RBM19     |
| STAT1 | RCN1      |
| STAT1 | RNASE6    |
| STAT1 | RND1      |
| STAT1 | RNF103    |
| STAT1 | RNF14     |
| STAT1 | RNF213    |
| STAT1 | RNF24     |
| STAT1 | RNPEPL1   |
| STAT1 | RPL10     |
| STAT1 | RPL18A    |
| STAT1 | RPL23     |
| STAT1 | RPL29     |
| STAT1 | RPL32     |
| STAT1 | RPL35A    |
| STAT1 | RPS11     |
| STAT1 | RPS13     |
| STAT1 | RPS6KA1   |
| STAT1 | RSAD2     |
| STAT1 | S100A4    |
| STAT1 | SAMD9     |
| STAT1 | SAMD9L    |
| STAT1 | SARS2     |
| STAT1 | SASH3     |
| STAT1 | SCAPER    |
| STAT1 | SCPEP1    |
| STAT1 | SEC22B    |
| STAT1 | SEC61A1   |
| STAT1 | SECISBP2L |
| STAT1 | SELL      |
| STAT1 | SENP6     |
| STAT1 | SF3A1     |
| STAT1 | SIK3      |
| STAT1 | SLAMF7    |
| STAT1 | SLC30A7   |

|       |            |
|-------|------------|
| STAT1 | SLC35E2B   |
| STAT1 | SLC38A10   |
| STAT1 | SLC39A6    |
| STAT1 | SLC44A1    |
| STAT1 | SLC7A5     |
| STAT1 | SLC9A3     |
| STAT1 | SLFN5      |
| STAT1 | SNX19      |
| STAT1 | SP100      |
| STAT1 | SP110      |
| STAT1 | SP140      |
| STAT1 | SPATA20    |
| STAT1 | SPINT2     |
| STAT1 | SPPL2B     |
| STAT1 | SSTR2      |
| STAT1 | ST6GAL1    |
| STAT1 | ST6GALNAC4 |
| STAT1 | STAP1      |
| STAT1 | STARD5     |
| STAT1 | STAT1      |
| STAT1 | STK32C     |
| STAT1 | STX12      |
| STAT1 | SUB1       |
| STAT1 | SUCLG2     |
| STAT1 | SYT11      |
| STAT1 | TAF1       |
| STAT1 | TAP1       |
| STAT1 | TAPBPL     |
| STAT1 | TARSL2     |
| STAT1 | TBC1D31    |
| STAT1 | TCTN3      |
| STAT1 | TECR       |
| STAT1 | TFAP4      |
| STAT1 | TGIF1      |
| STAT1 | THEMIS2    |
| STAT1 | TKFC       |
| STAT1 | TM7SF2     |
| STAT1 | TM9SF2     |
| STAT1 | TMBIM6     |
| STAT1 | TMED7      |
| STAT1 | TMEM140    |
| STAT1 | TMEM185B   |
| STAT1 | TMEM219    |
| STAT1 | TMSB10     |
| STAT1 | TNFRSF13B  |
| STAT1 | TNFSF10    |
| STAT1 | TP53I13    |
| STAT1 | TP53INP1   |
| STAT1 | TPST2      |
| STAT1 | TRAF3      |

|       |            |
|-------|------------|
| STAT1 | TRAM1      |
| STAT1 | TRIB1      |
| STAT1 | TRIM44     |
| STAT1 | TRIM69     |
| STAT1 | TRIM8      |
| STAT1 | TRMT10B    |
| STAT1 | TRPV2      |
| STAT1 | TSPYL1     |
| STAT1 | TTN        |
| STAT1 | TULP4      |
| STAT1 | UBE2L6     |
| STAT1 | UNC93B1    |
| STAT1 | URI1       |
| STAT1 | UROD       |
| STAT1 | USP18      |
| STAT1 | VARS       |
| STAT1 | VKORC1     |
| STAT1 | VPS41      |
| STAT1 | VRK2       |
| STAT1 | WARS       |
| STAT1 | WDR26      |
| STAT1 | WIPF2      |
| STAT1 | XAF1       |
| STAT1 | YPEL5      |
| STAT1 | ZBTB11-AS1 |
| STAT1 | ZBTB20     |
| STAT1 | ZBTB43     |
| STAT1 | ZBTB7B     |
| STAT1 | ZC3H7B     |
| STAT1 | ZFP36L2    |
| STAT1 | ZNF281     |
| STAT1 | ZNF566     |
| STAT1 | ZNF821     |
| STAT1 | ZNF865     |
| STAT1 | ZPBP2      |
| STAT2 | ADM        |
| STAT2 | AFTPH      |
| STAT2 | APOL2      |
| STAT2 | ARHGAP30   |
| STAT2 | ARL5B      |
| STAT2 | ATP1B1     |
| STAT2 | CD37       |
| STAT2 | CXorf21    |
| STAT2 | EVI5       |
| STAT2 | FAM172A    |
| STAT2 | FBX011     |
| STAT2 | HIST1H1C   |
| STAT2 | HLA-B      |
| STAT2 | IN080      |
| STAT2 | IRF7       |



|        |          |
|--------|----------|
| STAT2  | KCNN3    |
| STAT2  | KRT10    |
| STAT2  | LEF1     |
| STAT2  | LMF1     |
| STAT2  | LRRK2    |
| STAT2  | ME2      |
| STAT2  | MEF2C    |
| STAT2  | METTLL7A |
| STAT2  | MIA3     |
| STAT2  | NCALD    |
| STAT2  | NEAT1    |
| STAT2  | NEDD9    |
| STAT2  | OAF      |
| STAT2  | PARP10   |
| STAT2  | PATZ1    |
| STAT2  | RH0BTB2  |
| STAT2  | RTN4     |
| STAT2  | SEC61A1  |
| STAT2  | SH2B1    |
| STAT2  | STAT2    |
| STAT2  | TNFRSF17 |
| STAT2  | TNRC6B   |
| STAT2  | TSC22D1  |
| STAT2  | UBE2L6   |
| STAT2  | US01     |
| STAT2  | USP3     |
| STAT2  | VAMP5    |
| STAT2  | VAV1     |
| STAT2  | XP06     |
| STAT2  | XRN1     |
| STAT2  | ZFX      |
| STAT3  | CHD1     |
| STAT3  | ETV6     |
| STAT3  | MLLT1    |
| STAT3  | POU2F2   |
| STAT3  | RPL18A   |
| STAT3  | SERPINF2 |
| STAT3  | SLC25A44 |
| STAT3  | SSBP4    |
| STAT3  | STAT3    |
| STAT5A | ACTR6    |
| STAT5A | ADIPOR2  |
| STAT5A | ADO      |
| STAT5A | ADSS     |
| STAT5A | AEN      |
| STAT5A | AHCY     |
| STAT5A | AHSA1    |
| STAT5A | AMD1     |
| STAT5A | ARPP19   |
| STAT5A | ASXL1    |

STAT5A ATP13A2  
STAT5A AUP1  
STAT5A BOD1  
STAT5A C12orf29  
STAT5A C12orf43  
STAT5A C19orf70  
STAT5A C1orf109  
STAT5A CA11  
STAT5A CAND1  
STAT5A CAPN15  
STAT5A CARS  
STAT5A CCDC25  
STAT5A CCDC77  
STAT5A CCT7  
STAT5A CD163L1  
STAT5A CD3EAP  
STAT5A CDIP1  
STAT5A CFLAR  
STAT5A CHAC2  
STAT5A CHCHD3  
STAT5A CHMP4B  
STAT5A CIRBP  
STAT5A CLPB  
STAT5A CSNK2A1  
STAT5A CSNK2B  
STAT5A CTDP1  
STAT5A DDX49  
STAT5A DFFA  
STAT5A DIMT1  
STAT5A DPH2  
STAT5A DUS3L  
STAT5A EI24  
STAT5A EIF2S2  
STAT5A EIF4E  
STAT5A EIF5A  
STAT5A EIF5B  
STAT5A EML4  
STAT5A EMP3  
STAT5A ENY2  
STAT5A ERI3  
STAT5A FKBP4  
STAT5A FOSL1  
STAT5A FTH1  
STAT5A FTSJ1  
STAT5A FYN  
STAT5A GGPS1  
STAT5A GPD1L  
STAT5A GRWD1  
STAT5A GSPT1  
STAT5A HSPH1

STAT5A IFRD1  
STAT5A IFRD2  
STAT5A ISG20L2  
STAT5A ISOC2  
STAT5A JARID2  
STAT5A KIF13B  
STAT5A KPNA1  
STAT5A KRR1  
STAT5A LARS  
STAT5A M6PR  
STAT5A MAD2L1BP  
STAT5A MARS  
STAT5A MAU2  
STAT5A MCMBP  
STAT5A MCRIP2  
STAT5A MRPL24  
STAT5A MRPL32  
STAT5A MRPL50  
STAT5A MRPS26  
STAT5A NCLN  
STAT5A NFKBIB  
STAT5A NMT1  
STAT5A NOP10  
STAT5A NOP14  
STAT5A NPL  
STAT5A NRR0S  
STAT5A NUDCD1  
STAT5A NUTF2  
STAT5A OGF0D1  
STAT5A OTUD4  
STAT5A PA2G4  
STAT5A PABPC1  
STAT5A PEMT  
STAT5A PHB  
STAT5A PLEKHA1  
STAT5A PMM2  
STAT5A POLR1A  
STAT5A POLR1E  
STAT5A PRCC  
STAT5A PRMT5  
STAT5A PRPF19  
STAT5A PRPF31  
STAT5A PSMA2  
STAT5A PSMC4  
STAT5A PSMD11  
STAT5A PSMD4  
STAT5A RAB29  
STAT5A RAB34  
STAT5A RIC8B  
STAT5A RNF2

STAT5A RPIA  
STAT5A RPL7  
STAT5A RPP40  
STAT5A RRS1  
STAT5A SCAMP3  
STAT5A SERBP1  
STAT5A SF3B5  
STAT5A SGF29  
STAT5A SHMT2  
STAT5A SLC20A2  
STAT5A SLC25A19  
STAT5A SLC27A4  
STAT5A SLC38A5  
STAT5A SLC7A1  
STAT5A SNHG12  
STAT5A SNW1  
STAT5A SNX11  
STAT5A SRRM2  
STAT5A STX4  
STAT5A TARBP2  
STAT5A TFAP4  
STAT5A THOC6  
STAT5A TIMM13  
STAT5A TMEM109  
STAT5A TMEM147  
STAT5A TMEM150A  
STAT5A TMEM208  
STAT5A TMEM33  
STAT5A TMEM43  
STAT5A TMEM69  
STAT5A TNP02  
STAT5A TOB2  
STAT5A TOP3A  
STAT5A TP53  
STAT5A TRIP10  
STAT5A TSNAX  
STAT5A TSSC4  
STAT5A TXLNG  
STAT5A UBE2D1  
STAT5A UBE2N  
STAT5A UBQLN4  
STAT5A UBXN8  
STAT5A USP14  
STAT5A UTP11  
STAT5A VAPA  
STAT5A VDAC1  
STAT5A WDR12  
STAT5A WDR46  
STAT5A WRN  
STAT5A XPOT

|        |            |
|--------|------------|
| STAT5A | YBX3       |
| STAT5A | ZFAS1      |
| STAT5A | ZFC3H1     |
| STAT5A | ZFR        |
| STAT5A | ZNF165     |
| STAT5A | ZNF263     |
| STAT5A | ZNF317     |
| STAT5A | ZNF32      |
| STAT5A | ZNF37A     |
| STAT5A | ZNF383     |
| STAT5A | ZNF583     |
| STAT5A | ZNF587B    |
| STAT5A | ZNF667-AS1 |
| STAT5A | ZRANB3     |
| TBP    | BMP7       |
| TBP    | C16orf54   |
| TBP    | CCDC141    |
| TBP    | CTNNA1     |
| TBP    | FAM185A    |
| TBP    | HNRNP1     |
| TBP    | LETMD1     |
| TBP    | MPZL1      |
| TBP    | NNT        |
| TBP    | RASGEF1B   |
| TBP    | SLX4IP     |
| TBP    | SPRED2     |
| TBP    | TBP        |
| TBP    | TSPYL1     |
| TBX21  | ANGPTL6    |
| TBX21  | COPS2      |
| TBX21  | CTGF       |
| TBX21  | CYSLTR1    |
| TBX21  | EMP3       |
| TBX21  | HK1        |
| TBX21  | RREB1      |
| TBX21  | TMBIM1     |
| TBX21  | TNFSF10    |
| TCF12  | ACP6       |
| TCF12  | AHDC1      |
| TCF12  | DUSP14     |
| TCF12  | GLRX2      |
| TCF12  | LDB1       |
| TCF12  | MOSPD1     |
| TCF12  | PLA2G12A   |
| TCF12  | SLC25A45   |
| TCF12  | SLC43A2    |
| TCF12  | TCF12      |
| TCF12  | UBE2V1     |
| TCF4   | CD24       |
| TCF4   | CXXC5      |

|       |          |
|-------|----------|
| TCF4  | HCK      |
| TCF4  | IL16     |
| TCF4  | PFDN5    |
| TCF4  | RPL10    |
| TCF4  | TCF4     |
| TFDP1 | A4GALT   |
| TFDP1 | AAAS     |
| TFDP1 | AASDHPPT |
| TFDP1 | AATF     |
| TFDP1 | ABCB10   |
| TFDP1 | ABCD3    |
| TFDP1 | ABCF1    |
| TFDP1 | ABHD10   |
| TFDP1 | ABHD11   |
| TFDP1 | ABHD12   |
| TFDP1 | ABHD17A  |
| TFDP1 | ABHD17B  |
| TFDP1 | ABHD5    |
| TFDP1 | ABI1     |
| TFDP1 | ABI2     |
| TFDP1 | ABRACL   |
| TFDP1 | ABTB1    |
| TFDP1 | ACAA1    |
| TFDP1 | ACAA2    |
| TFDP1 | ACACA    |
| TFDP1 | ACAD9    |
| TFDP1 | ACAP2    |
| TFDP1 | ACAP3    |
| TFDP1 | ACAT2    |
| TFDP1 | ACBD6    |
| TFDP1 | ACLY     |
| TFDP1 | AC02     |
| TFDP1 | AC0T13   |
| TFDP1 | AC0T7    |
| TFDP1 | AC0T8    |
| TFDP1 | ACSF2    |
| TFDP1 | ACSL5    |
| TFDP1 | ACTA2    |
| TFDP1 | ACTB     |
| TFDP1 | ACTL6A   |
| TFDP1 | ACTN4    |
| TFDP1 | ACTR1B   |
| TFDP1 | ACTR3    |
| TFDP1 | ACTR5    |
| TFDP1 | ACTR6    |
| TFDP1 | ACTR8    |
| TFDP1 | ACYP1    |
| TFDP1 | ADA      |
| TFDP1 | ADAM17   |
| TFDP1 | ADAM9    |

|       |          |
|-------|----------|
| TFDP1 | ADAT1    |
| TFDP1 | ADD1     |
| TFDP1 | ADD3     |
| TFDP1 | ADH5     |
| TFDP1 | ADIPOR1  |
| TFDP1 | ADIPOR2  |
| TFDP1 | ADNP     |
| TFDP1 | ADPRHL2  |
| TFDP1 | ADRM1    |
| TFDP1 | ADSL     |
| TFDP1 | ADSS     |
| TFDP1 | AEBP2    |
| TFDP1 | AEN      |
| TFDP1 | AGAP2    |
| TFDP1 | AGBL5    |
| TFDP1 | AGFG1    |
| TFDP1 | AGGF1    |
| TFDP1 | AGL      |
| TFDP1 | AG01     |
| TFDP1 | AGPAT1   |
| TFDP1 | AGPAT2   |
| TFDP1 | AGTPBP1  |
| TFDP1 | AHCY     |
| TFDP1 | AHCYL1   |
| TFDP1 | AHI1     |
| TFDP1 | AHSA1    |
| TFDP1 | AIFM1    |
| TFDP1 | AIG1     |
| TFDP1 | AIP      |
| TFDP1 | AK2      |
| TFDP1 | AK3      |
| TFDP1 | AK4      |
| TFDP1 | AKAP1    |
| TFDP1 | AKAP13   |
| TFDP1 | AKAP8    |
| TFDP1 | AKIP1    |
| TFDP1 | AKIRIN2  |
| TFDP1 | AKR1B1   |
| TFDP1 | AKT2     |
| TFDP1 | ALAD     |
| TFDP1 | ALAS1    |
| TFDP1 | ALDH16A1 |
| TFDP1 | ALDH6A1  |
| TFDP1 | ALDH7A1  |
| TFDP1 | ALDH9A1  |
| TFDP1 | ALDOA    |
| TFDP1 | ALG13    |
| TFDP1 | ALG6     |
| TFDP1 | ALKBH5   |
| TFDP1 | AMD1     |

|       |          |
|-------|----------|
| TFDP1 | AMFR     |
| TFDP1 | ANAPC1   |
| TFDP1 | ANAPC10  |
| TFDP1 | ANAPC11  |
| TFDP1 | ANAPC13  |
| TFDP1 | ANAPC15  |
| TFDP1 | ANAPC4   |
| TFDP1 | ANAPC5   |
| TFDP1 | ANGEL2   |
| TFDP1 | ANK1     |
| TFDP1 | ANKH     |
| TFDP1 | ANKLE2   |
| TFDP1 | ANKRD13A |
| TFDP1 | ANKRD13C |
| TFDP1 | ANKRD17  |
| TFDP1 | ANKRD26  |
| TFDP1 | ANKRD33B |
| TFDP1 | ANKRD39  |
| TFDP1 | ANKRD54  |
| TFDP1 | ANLN     |
| TFDP1 | ANP32A   |
| TFDP1 | ANP32B   |
| TFDP1 | ANP32E   |
| TFDP1 | ANXA11   |
| TFDP1 | ANXA5    |
| TFDP1 | ANXA6    |
| TFDP1 | AP1AR    |
| TFDP1 | AP1G2    |
| TFDP1 | AP1M1    |
| TFDP1 | AP1S1    |
| TFDP1 | AP1S2    |
| TFDP1 | AP2B1    |
| TFDP1 | AP2M1    |
| TFDP1 | AP2S1    |
| TFDP1 | AP3D1    |
| TFDP1 | AP4E1    |
| TFDP1 | AP4M1    |
| TFDP1 | AP5M1    |
| TFDP1 | APEX2    |
| TFDP1 | APIP     |
| TFDP1 | APLP2    |
| TFDP1 | APOLD1   |
| TFDP1 | APOM     |
| TFDP1 | APPBP2   |
| TFDP1 | APPL1    |
| TFDP1 | APPL2    |
| TFDP1 | ARF1     |
| TFDP1 | ARF3     |
| TFDP1 | ARF4-AS1 |
| TFDP1 | ARF5     |



|       |           |
|-------|-----------|
| TFDP1 | ARF6      |
| TFDP1 | ARGLU1    |
| TFDP1 | ARHGAP1   |
| TFDP1 | ARHGAP10  |
| TFDP1 | ARHGAP11A |
| TFDP1 | ARHGAP27  |
| TFDP1 | ARHGAP35  |
| TFDP1 | ARHGAP4   |
| TFDP1 | ARHGAP44  |
| TFDP1 | ARHGDIA   |
| TFDP1 | ARHGDIB   |
| TFDP1 | ARHGEF1   |
| TFDP1 | ARHGEF12  |
| TFDP1 | ARHGEF2   |
| TFDP1 | ARHGEF39  |
| TFDP1 | ARHGEF7   |
| TFDP1 | ARID1A    |
| TFDP1 | ARID1B    |
| TFDP1 | ARID4B    |
| TFDP1 | ARID5A    |
| TFDP1 | ARL13B    |
| TFDP1 | ARL16     |
| TFDP1 | ARL17A    |
| TFDP1 | ARL2      |
| TFDP1 | ARL3      |
| TFDP1 | ARL6IP1   |
| TFDP1 | ARL6IP6   |
| TFDP1 | ARMC1     |
| TFDP1 | ARPC1A    |
| TFDP1 | ARPC1B    |
| TFDP1 | ARPC2     |
| TFDP1 | ARPC3     |
| TFDP1 | ARPC4     |
| TFDP1 | ARPP19    |
| TFDP1 | ARV1      |
| TFDP1 | ASB1      |
| TFDP1 | ASB13     |
| TFDP1 | ASB16-AS1 |
| TFDP1 | ASB3      |
| TFDP1 | ASCC1     |
| TFDP1 | ASF1A     |
| TFDP1 | ASF1B     |
| TFDP1 | ASH2L     |
| TFDP1 | ASNA1     |
| TFDP1 | ASNSD1    |
| TFDP1 | ASPH      |
| TFDP1 | ASPSCR1   |
| TFDP1 | ASRGL1    |
| TFDP1 | ASXL1     |
| TFDP1 | ATAD2     |

|       |           |
|-------|-----------|
| TFDP1 | ATAD3A    |
| TFDP1 | ATAD5     |
| TFDP1 | ATF1      |
| TFDP1 | ATF4      |
| TFDP1 | ATF6B     |
| TFDP1 | ATF7      |
| TFDP1 | ATF7IP2   |
| TFDP1 | ATG10     |
| TFDP1 | ATG12     |
| TFDP1 | ATG16L2   |
| TFDP1 | ATG3      |
| TFDP1 | ATG4D     |
| TFDP1 | ATG5      |
| TFDP1 | ATG7      |
| TFDP1 | ATM       |
| TFDP1 | ATP1A1    |
| TFDP1 | ATP23     |
| TFDP1 | ATP2A3    |
| TFDP1 | ATP6AP2   |
| TFDP1 | ATP6V0D1  |
| TFDP1 | ATP6V1A   |
| TFDP1 | ATP6V1C1  |
| TFDP1 | ATP6V1D   |
| TFDP1 | ATP6V1E1  |
| TFDP1 | ATP6V1F   |
| TFDP1 | ATP6V1H   |
| TFDP1 | ATPAF1    |
| TFDP1 | ATRAID    |
| TFDP1 | ATRIP     |
| TFDP1 | ATRX      |
| TFDP1 | ATXN10    |
| TFDP1 | ATXN2L    |
| TFDP1 | ATXN7L2   |
| TFDP1 | ATXN7L3   |
| TFDP1 | AUNIP     |
| TFDP1 | AURKB     |
| TFDP1 | AZIN1     |
| TFDP1 | AZIN1-AS1 |
| TFDP1 | B3GALNT1  |
| TFDP1 | B3GAT3    |
| TFDP1 | B3GNT2    |
| TFDP1 | B4GALT4   |
| TFDP1 | B9D2      |
| TFDP1 | BABAM1    |
| TFDP1 | BACH2     |
| TFDP1 | BAG5      |
| TFDP1 | BAG6      |
| TFDP1 | BANF1     |
| TFDP1 | BANP      |
| TFDP1 | BARD1     |

|       |         |
|-------|---------|
| TFDP1 | BASP1   |
| TFDP1 | BATF    |
| TFDP1 | BAZ1A   |
| TFDP1 | BAZ1B   |
| TFDP1 | BAZ2A   |
| TFDP1 | BBIP1   |
| TFDP1 | BCAP29  |
| TFDP1 | BCAP31  |
| TFDP1 | BCAR1   |
| TFDP1 | BCAR3   |
| TFDP1 | BCAS2   |
| TFDP1 | BCAT2   |
| TFDP1 | BCCIP   |
| TFDP1 | BCKDHB  |
| TFDP1 | BCL11A  |
| TFDP1 | BCL6    |
| TFDP1 | BCL7B   |
| TFDP1 | BCL7C   |
| TFDP1 | BCLAF1  |
| TFDP1 | BCOR    |
| TFDP1 | BDH1    |
| TFDP1 | BECN1   |
| TFDP1 | BEX3    |
| TFDP1 | BID     |
| TFDP1 | BIRC5   |
| TFDP1 | BLCAP   |
| TFDP1 | BLM     |
| TFDP1 | BLMH    |
| TFDP1 | BL0C1S1 |
| TFDP1 | BL0C1S5 |
| TFDP1 | BLVRB   |
| TFDP1 | BMP2K   |
| TFDP1 | BMP7    |
| TFDP1 | BNIP1   |
| TFDP1 | BNIP3   |
| TFDP1 | BOD1L1  |
| TFDP1 | BOLA1   |
| TFDP1 | BOLA3   |
| TFDP1 | BORA    |
| TFDP1 | BPNT1   |
| TFDP1 | BPTF    |
| TFDP1 | BRAT1   |
| TFDP1 | BRCA1   |
| TFDP1 | BRCA2   |
| TFDP1 | BRD2    |
| TFDP1 | BRD7    |
| TFDP1 | BRI3BP  |
| TFDP1 | BRMS1L  |
| TFDP1 | BROX    |
| TFDP1 | BRWD1   |

|       |          |
|-------|----------|
| TFDP1 | BTBD1    |
| TFDP1 | BTBD10   |
| TFDP1 | BTF3     |
| TFDP1 | BTF3L4   |
| TFDP1 | BTG1     |
| TFDP1 | BTG3     |
| TFDP1 | BTRC     |
| TFDP1 | BUB1B    |
| TFDP1 | BUB3     |
| TFDP1 | BUD31    |
| TFDP1 | BZW1     |
| TFDP1 | C11orf24 |
| TFDP1 | C11orf58 |
| TFDP1 | C12orf42 |
| TFDP1 | C12orf49 |
| TFDP1 | C12orf65 |
| TFDP1 | C12orf75 |
| TFDP1 | C15orf39 |
| TFDP1 | C16orf72 |
| TFDP1 | C16orf87 |
| TFDP1 | C16orf91 |
| TFDP1 | C17orf58 |
| TFDP1 | C17orf75 |
| TFDP1 | C18orf25 |
| TFDP1 | C19orf38 |
| TFDP1 | C19orf48 |
| TFDP1 | C19orf54 |
| TFDP1 | C1orf112 |
| TFDP1 | C1orf35  |
| TFDP1 | C1orf43  |
| TFDP1 | C1orf52  |
| TFDP1 | C1orf74  |
| TFDP1 | C1QBP    |
| TFDP1 | C21orf58 |
| TFDP1 | C21orf91 |
| TFDP1 | C2CD2L   |
| TFDP1 | C2orf49  |
| TFDP1 | C2orf74  |
| TFDP1 | C3orf14  |
| TFDP1 | C3orf38  |
| TFDP1 | C3orf67  |
| TFDP1 | C4orf33  |
| TFDP1 | C4orf46  |
| TFDP1 | C5       |
| TFDP1 | C5orf24  |
| TFDP1 | C5orf34  |
| TFDP1 | C5orf51  |
| TFDP1 | C6orf136 |
| TFDP1 | C6orf226 |
| TFDP1 | C6orf52  |

|       |          |
|-------|----------|
| TFDP1 | C6orf62  |
| TFDP1 | C6orf99  |
| TFDP1 | C8orf76  |
| TFDP1 | C9orf16  |
| TFDP1 | C9orf40  |
| TFDP1 | C9orf64  |
| TFDP1 | CAAP1    |
| TFDP1 | CAB39    |
| TFDP1 | CABLES2  |
| TFDP1 | CACYBP   |
| TFDP1 | CALM1    |
| TFDP1 | CALM2    |
| TFDP1 | CALM3    |
| TFDP1 | CAMK2G   |
| TFDP1 | CAMKK2   |
| TFDP1 | CAMLG    |
| TFDP1 | CAMTA1   |
| TFDP1 | CAND1    |
| TFDP1 | CAP1     |
| TFDP1 | CAPN1    |
| TFDP1 | CAPN7    |
| TFDP1 | CAPNS1   |
| TFDP1 | CAPRIN1  |
| TFDP1 | CAPZA1   |
| TFDP1 | CAPZA2   |
| TFDP1 | CAPZB    |
| TFDP1 | CARHSP1  |
| TFDP1 | CARNMT1  |
| TFDP1 | CARS     |
| TFDP1 | CASC4    |
| TFDP1 | CASP2    |
| TFDP1 | CASP3    |
| TFDP1 | CASP7    |
| TFDP1 | CASP8AP2 |
| TFDP1 | CBFA2T3  |
| TFDP1 | CBFB     |
| TFDP1 | CBL      |
| TFDP1 | CBR4     |
| TFDP1 | CBWD1    |
| TFDP1 | CBX1     |
| TFDP1 | CBX2     |
| TFDP1 | CBX3     |
| TFDP1 | CBX5     |
| TFDP1 | CC2D1A   |
| TFDP1 | CCAR1    |
| TFDP1 | CCAR2    |
| TFDP1 | CCDC102A |
| TFDP1 | CCDC107  |
| TFDP1 | CCDC124  |
| TFDP1 | CCDC126  |

|       |         |
|-------|---------|
| TFDP1 | CCDC150 |
| TFDP1 | CCDC152 |
| TFDP1 | CCDC167 |
| TFDP1 | CCDC174 |
| TFDP1 | CCDC189 |
| TFDP1 | CCDC25  |
| TFDP1 | CCDC28A |
| TFDP1 | CCDC28B |
| TFDP1 | CCDC34  |
| TFDP1 | CCDC47  |
| TFDP1 | CCDC51  |
| TFDP1 | CCDC57  |
| TFDP1 | CCDC77  |
| TFDP1 | CCDC82  |
| TFDP1 | CCDC84  |
| TFDP1 | CCDC88A |
| TFDP1 | CCDC90B |
| TFDP1 | CCHCR1  |
| TFDP1 | CCM2    |
| TFDP1 | CCNC    |
| TFDP1 | CCND3   |
| TFDP1 | CCNE1   |
| TFDP1 | CCNE2   |
| TFDP1 | CCNF    |
| TFDP1 | CCNG1   |
| TFDP1 | CCNG2   |
| TFDP1 | CCNI    |
| TFDP1 | CCNK    |
| TFDP1 | CCNL2   |
| TFDP1 | CCNT1   |
| TFDP1 | CCP110  |
| TFDP1 | CCSAP   |
| TFDP1 | CCT2    |
| TFDP1 | CCT5    |
| TFDP1 | CCT7    |
| TFDP1 | CCT8    |
| TFDP1 | CCZ1    |
| TFDP1 | CCZ1B   |
| TFDP1 | CD164   |
| TFDP1 | CD2AP   |
| TFDP1 | CD2BP2  |
| TFDP1 | CD47    |
| TFDP1 | CD79B   |
| TFDP1 | CDC123  |
| TFDP1 | CDC16   |
| TFDP1 | CDC23   |
| TFDP1 | CDC25B  |
| TFDP1 | CDC27   |
| TFDP1 | CDC34   |
| TFDP1 | CDC37   |

|       |            |
|-------|------------|
| TFDP1 | CDC37L1    |
| TFDP1 | CDC40      |
| TFDP1 | CDC42      |
| TFDP1 | CDC42EP3   |
| TFDP1 | CDC42SE2   |
| TFDP1 | CDC45      |
| TFDP1 | CDC5L      |
| TFDP1 | CDC6       |
| TFDP1 | CDC7       |
| TFDP1 | CDC73      |
| TFDP1 | CDCA4      |
| TFDP1 | CDCA5      |
| TFDP1 | CDCA7      |
| TFDP1 | CDCA7L     |
| TFDP1 | CDIPT      |
| TFDP1 | CDK1       |
| TFDP1 | CDK11B     |
| TFDP1 | CDK12      |
| TFDP1 | CDK16      |
| TFDP1 | CDK19      |
| TFDP1 | CDK2       |
| TFDP1 | CDK2AP2    |
| TFDP1 | CDK4       |
| TFDP1 | CDK5RAP2   |
| TFDP1 | CDK5RAP3   |
| TFDP1 | CDK6       |
| TFDP1 | CDK9       |
| TFDP1 | CDKN2A     |
| TFDP1 | CDKN2AIP   |
| TFDP1 | CDKN2AIPNL |
| TFDP1 | CDKN2C     |
| TFDP1 | CDKN2D     |
| TFDP1 | CDKN3      |
| TFDP1 | CDS2       |
| TFDP1 | CDT1       |
| TFDP1 | CDV3       |
| TFDP1 | CEBPD      |
| TFDP1 | CEBPG      |
| TFDP1 | CEBPZOS    |
| TFDP1 | CELF1      |
| TFDP1 | CENPH      |
| TFDP1 | CENPJ      |
| TFDP1 | CENPK      |
| TFDP1 | CENPL      |
| TFDP1 | CENPM      |
| TFDP1 | CENPN      |
| TFDP1 | CENPO      |
| TFDP1 | CENPP      |
| TFDP1 | CENPQ      |
| TFDP1 | CENPT      |

|       |         |
|-------|---------|
| TFDP1 | CENPU   |
| TFDP1 | CENPW   |
| TFDP1 | CEP152  |
| TFDP1 | CEP192  |
| TFDP1 | CEP295  |
| TFDP1 | CEP350  |
| TFDP1 | CEP44   |
| TFDP1 | CEP57   |
| TFDP1 | CEP57L1 |
| TFDP1 | CEP63   |
| TFDP1 | CEP78   |
| TFDP1 | CEP89   |
| TFDP1 | CEP97   |
| TFDP1 | CETN2   |
| TFDP1 | CETN3   |
| TFDP1 | CFAP20  |
| TFDP1 | CFAP73  |
| TFDP1 | CFDP1   |
| TFDP1 | CFL1    |
| TFDP1 | CFL2    |
| TFDP1 | CGGBP1  |
| TFDP1 | CHAC2   |
| TFDP1 | CHAF1A  |
| TFDP1 | CHAF1B  |
| TFDP1 | CHAMP1  |
| TFDP1 | CHCHD1  |
| TFDP1 | CHCHD10 |
| TFDP1 | CHCHD2  |
| TFDP1 | CHCHD3  |
| TFDP1 | CHCHD5  |
| TFDP1 | CHCHD7  |
| TFDP1 | CHD3    |
| TFDP1 | CHD4    |
| TFDP1 | CHD6    |
| TFDP1 | CHD8    |
| TFDP1 | CHEK1   |
| TFDP1 | CHEK2   |
| TFDP1 | CHERP   |
| TFDP1 | CHIC2   |
| TFDP1 | CHMP1A  |
| TFDP1 | CHMP4B  |
| TFDP1 | CHMP5   |
| TFDP1 | CHP1    |
| TFDP1 | CHRAC1  |
| TFDP1 | CHST14  |
| TFDP1 | CHTF18  |
| TFDP1 | CHTF8   |
| TFDP1 | CHTOP   |
| TFDP1 | CHUK    |
| TFDP1 | CHURC1  |



|       |          |
|-------|----------|
| TFDP1 | CIAPIN1  |
| TFDP1 | CIB1     |
| TFDP1 | CIC      |
| TFDP1 | CIRBP    |
| TFDP1 | CIT      |
| TFDP1 | CIZ1     |
| TFDP1 | CKLF     |
| TFDP1 | CKS1B    |
| TFDP1 | CKS2     |
| TFDP1 | CLDN23   |
| TFDP1 | CLDND1   |
| TFDP1 | CLEC16A  |
| TFDP1 | CLIC4    |
| TFDP1 | CLINT1   |
| TFDP1 | CLK1     |
| TFDP1 | CLK3     |
| TFDP1 | CLN6     |
| TFDP1 | CLNS1A   |
| TFDP1 | CLP1     |
| TFDP1 | CLPX     |
| TFDP1 | CLSPN    |
| TFDP1 | CLSTN1   |
| TFDP1 | CLTA     |
| TFDP1 | CLTB     |
| TFDP1 | CLTC     |
| TFDP1 | CMC2     |
| TFDP1 | CMPK1    |
| TFDP1 | CNBP     |
| TFDP1 | CNIH1    |
| TFDP1 | CN0T1    |
| TFDP1 | CN0T10   |
| TFDP1 | CN0T11   |
| TFDP1 | CN0T2    |
| TFDP1 | CN0T3    |
| TFDP1 | CN0T4    |
| TFDP1 | CN0T6L   |
| TFDP1 | CN0T7    |
| TFDP1 | CN0T8    |
| TFDP1 | CN0T9    |
| TFDP1 | CNP      |
| TFDP1 | CNPPD1   |
| TFDP1 | CNTLN    |
| TFDP1 | COA5     |
| TFDP1 | COA6     |
| TFDP1 | COASY    |
| TFDP1 | COCH     |
| TFDP1 | COG4     |
| TFDP1 | COLGALT1 |
| TFDP1 | COMMD1   |
| TFDP1 | COMMD4   |

|       |        |
|-------|--------|
| TFDP1 | COMMD5 |
| TFDP1 | COMMD6 |
| TFDP1 | COMTD1 |
| TFDP1 | COPE   |
| TFDP1 | COPRS  |
| TFDP1 | COPS3  |
| TFDP1 | COPS4  |
| TFDP1 | COPS5  |
| TFDP1 | COPS7A |
| TFDP1 | COPS7B |
| TFDP1 | COQ10A |
| TFDP1 | COQ4   |
| TFDP1 | COQ7   |
| TFDP1 | COQ9   |
| TFDP1 | COR01A |
| TFDP1 | COR01B |
| TFDP1 | COTL1  |
| TFDP1 | COX11  |
| TFDP1 | COX14  |
| TFDP1 | COX17  |
| TFDP1 | COX4I1 |
| TFDP1 | COX5A  |
| TFDP1 | COX5B  |
| TFDP1 | COX6A1 |
| TFDP1 | COX6B1 |
| TFDP1 | COX7B  |
| TFDP1 | COX7C  |
| TFDP1 | COX8A  |
| TFDP1 | CPNE1  |
| TFDP1 | CP0X   |
| TFDP1 | CPPED1 |
| TFDP1 | CPSF1  |
| TFDP1 | CPSF2  |
| TFDP1 | CPSF3  |
| TFDP1 | CPSF7  |
| TFDP1 | CPT2   |
| TFDP1 | CRADD  |
| TFDP1 | CRBN   |
| TFDP1 | CREB1  |
| TFDP1 | CREBBP |
| TFDP1 | CREBZF |
| TFDP1 | CRIP1  |
| TFDP1 | CRIPT  |
| TFDP1 | CRK    |
| TFDP1 | CRLS1  |
| TFDP1 | CRNDE  |
| TFDP1 | CR0T   |
| TFDP1 | CRTC2  |
| TFDP1 | CRYBB2 |
| TFDP1 | CS     |

|       |          |
|-------|----------|
| TFDP1 | CSDE1    |
| TFDP1 | CSE1L    |
| TFDP1 | CSRP1    |
| TFDP1 | CSTF1    |
| TFDP1 | CSTF2    |
| TFDP1 | CSTF2T   |
| TFDP1 | CSTF3    |
| TFDP1 | CTCF     |
| TFDP1 | CTDNEP1  |
| TFDP1 | CTDP1    |
| TFDP1 | CTDSP1   |
| TFDP1 | CTDSP2   |
| TFDP1 | CTDSPL2  |
| TFDP1 | CTNNA1   |
| TFDP1 | CTNNAL1  |
| TFDP1 | CTNNBIP1 |
| TFDP1 | CTNNBL1  |
| TFDP1 | CTPS1    |
| TFDP1 | CTTN     |
| TFDP1 | CUEDC2   |
| TFDP1 | CUL1     |
| TFDP1 | CUL3     |
| TFDP1 | CUL4A    |
| TFDP1 | CUL4B    |
| TFDP1 | CUTA     |
| TFDP1 | CUTC     |
| TFDP1 | CUX1     |
| TFDP1 | CWC22    |
| TFDP1 | CWC25    |
| TFDP1 | CWC27    |
| TFDP1 | CXCR4    |
| TFDP1 | CXorf56  |
| TFDP1 | CXXC5    |
| TFDP1 | CYB5A    |
| TFDP1 | CYB5B    |
| TFDP1 | CYB5D2   |
| TFDP1 | CYB5R3   |
| TFDP1 | CYB5R4   |
| TFDP1 | CYB5RL   |
| TFDP1 | CYC1     |
| TFDP1 | CYFIP2   |
| TFDP1 | DAD1     |
| TFDP1 | DARS     |
| TFDP1 | DARS-AS1 |
| TFDP1 | DAXX     |
| TFDP1 | DAZAP1   |
| TFDP1 | DAZAP2   |
| TFDP1 | DBF4     |
| TFDP1 | DBI      |
| TFDP1 | DCAF11   |

|       |         |
|-------|---------|
| TFDP1 | DCAF12  |
| TFDP1 | DCAF15  |
| TFDP1 | DCAF5   |
| TFDP1 | DCAF6   |
| TFDP1 | DCAF7   |
| TFDP1 | DCAKD   |
| TFDP1 | DCK     |
| TFDP1 | DCLRE1B |
| TFDP1 | DCLRE1C |
| TFDP1 | DCP2    |
| TFDP1 | DCTN2   |
| TFDP1 | DCTN3   |
| TFDP1 | DCTPP1  |
| TFDP1 | DCUN1D4 |
| TFDP1 | DCUN1D5 |
| TFDP1 | DCXR    |
| TFDP1 | DDA1    |
| TFDP1 | DDB1    |
| TFDP1 | DDB2    |
| TFDP1 | DDT     |
| TFDP1 | DDX11   |
| TFDP1 | DDX17   |
| TFDP1 | DDX18   |
| TFDP1 | DDX19B  |
| TFDP1 | DDX23   |
| TFDP1 | DDX27   |
| TFDP1 | DDX39A  |
| TFDP1 | DDX3X   |
| TFDP1 | DDX42   |
| TFDP1 | DDX46   |
| TFDP1 | DDX49   |
| TFDP1 | DDX50   |
| TFDP1 | DDX55   |
| TFDP1 | DEGS1   |
| TFDP1 | DEK     |
| TFDP1 | DENND2D |
| TFDP1 | DENND4A |
| TFDP1 | DENR    |
| TFDP1 | DEPDC1B |
| TFDP1 | DEPDC5  |
| TFDP1 | DESI2   |
| TFDP1 | DFFA    |
| TFDP1 | DGCR6L  |
| TFDP1 | DGCR8   |
| TFDP1 | DGKG    |
| TFDP1 | DGKH    |
| TFDP1 | DGU0K   |
| TFDP1 | DHCR24  |
| TFDP1 | DHFR    |
| TFDP1 | DHPS    |

|       |         |
|-------|---------|
| TFDP1 | DHRS1   |
| TFDP1 | DHRS4   |
| TFDP1 | DHRS4L2 |
| TFDP1 | DHRS7B  |
| TFDP1 | DHX15   |
| TFDP1 | DHX16   |
| TFDP1 | DHX30   |
| TFDP1 | DHX36   |
| TFDP1 | DHX9    |
| TFDP1 | DIAPH3  |
| TFDP1 | DICER1  |
| TFDP1 | DID01   |
| TFDP1 | DIS3    |
| TFDP1 | DIS3L   |
| TFDP1 | DLD     |
| TFDP1 | DLEU2   |
| TFDP1 | DLG1    |
| TFDP1 | DLG3    |
| TFDP1 | DLST    |
| TFDP1 | DMC1    |
| TFDP1 | DMD     |
| TFDP1 | DMTF1   |
| TFDP1 | DNAJA1  |
| TFDP1 | DNAJA2  |
| TFDP1 | DNAJA4  |
| TFDP1 | DNAJC15 |
| TFDP1 | DNAJC19 |
| TFDP1 | DNAJC21 |
| TFDP1 | DNAJC5  |
| TFDP1 | DNAJC9  |
| TFDP1 | DNAL1   |
| TFDP1 | DNM1L   |
| TFDP1 | DNMT1   |
| TFDP1 | DNTTIP1 |
| TFDP1 | DOCK2   |
| TFDP1 | DOHH    |
| TFDP1 | DONSON  |
| TFDP1 | DOPEY2  |
| TFDP1 | DPM1    |
| TFDP1 | DPM3    |
| TFDP1 | DPP8    |
| TFDP1 | DPP9    |
| TFDP1 | DPY30   |
| TFDP1 | DPYSL2  |
| TFDP1 | DR1     |
| TFDP1 | DRAM2   |
| TFDP1 | DRG1    |
| TFDP1 | DSCC1   |
| TFDP1 | DSN1    |
| TFDP1 | DTNBP1  |

|       |          |
|-------|----------|
| TFDP1 | DTX1     |
| TFDP1 | DTX2     |
| TFDP1 | DTYMK    |
| TFDP1 | DUS1L    |
| TFDP1 | DUSP1    |
| TFDP1 | DUSP15   |
| TFDP1 | DUSP23   |
| TFDP1 | DUT      |
| TFDP1 | DVL2     |
| TFDP1 | DVL3     |
| TFDP1 | DYNC1H1  |
| TFDP1 | DYNC1I2  |
| TFDP1 | DYNC1LI1 |
| TFDP1 | DYNLL2   |
| TFDP1 | DYNLT1   |
| TFDP1 | DYRK1A   |
| TFDP1 | E2F1     |
| TFDP1 | E2F5     |
| TFDP1 | E2F7     |
| TFDP1 | E2F8     |
| TFDP1 | EBAG9    |
| TFDP1 | EBF1     |
| TFDP1 | EBNA1BP2 |
| TFDP1 | EBP      |
| TFDP1 | ECH1     |
| TFDP1 | EDF1     |
| TFDP1 | EDRF1    |
| TFDP1 | EEA1     |
| TFDP1 | EED      |
| TFDP1 | EEF1A1   |
| TFDP1 | EEF1B2   |
| TFDP1 | EEF1E1   |
| TFDP1 | EEF1G    |
| TFDP1 | EEF2     |
| TFDP1 | EEFSEC   |
| TFDP1 | EEPD1    |
| TFDP1 | EFCAB12  |
| TFDP1 | EFHD2    |
| TFDP1 | EFTUD2   |
| TFDP1 | EGLN2    |
| TFDP1 | EGR1     |
| TFDP1 | EHBP1    |
| TFDP1 | EHMT2    |
| TFDP1 | EID1     |
| TFDP1 | EID2     |
| TFDP1 | EIF1     |
| TFDP1 | EIF1AD   |
| TFDP1 | EIF1AX   |
| TFDP1 | EIF1B    |
| TFDP1 | EIF2AK1  |

|       |          |
|-------|----------|
| TFDP1 | EIF2AK2  |
| TFDP1 | EIF2AK3  |
| TFDP1 | EIF2B2   |
| TFDP1 | EIF2D    |
| TFDP1 | EIF2S1   |
| TFDP1 | EIF2S2   |
| TFDP1 | EIF2S3   |
| TFDP1 | EIF3A    |
| TFDP1 | EIF3D    |
| TFDP1 | EIF3F    |
| TFDP1 | EIF3K    |
| TFDP1 | EIF3L    |
| TFDP1 | EIF4A2   |
| TFDP1 | EIF4A3   |
| TFDP1 | EIF4B    |
| TFDP1 | EIF4E    |
| TFDP1 | EIF4E2   |
| TFDP1 | EIF4EBP2 |
| TFDP1 | EIF4G1   |
| TFDP1 | EIF4G2   |
| TFDP1 | EIF4H    |
| TFDP1 | EIF5     |
| TFDP1 | EIF5A    |
| TFDP1 | EIF5AL1  |
| TFDP1 | ELAC1    |
| TFDP1 | ELAC2    |
| TFDP1 | ELAVL1   |
| TFDP1 | ELMSAN1  |
| TFDP1 | ELOF1    |
| TFDP1 | ELOVL1   |
| TFDP1 | ELOVL5   |
| TFDP1 | ELOVL6   |
| TFDP1 | ELP3     |
| TFDP1 | ELP4     |
| TFDP1 | ELP5     |
| TFDP1 | ELP6     |
| TFDP1 | EMB      |
| TFDP1 | EMC4     |
| TFDP1 | EMC8     |
| TFDP1 | EME1     |
| TFDP1 | EML3     |
| TFDP1 | EML6     |
| TFDP1 | ENKD1    |
| TFDP1 | EN01     |
| TFDP1 | EN02     |
| TFDP1 | ENOPH1   |
| TFDP1 | ENSA     |
| TFDP1 | ENY2     |
| TFDP1 | EP300    |
| TFDP1 | EPC1     |

|       |         |
|-------|---------|
| TFDP1 | EPC2    |
| TFDP1 | EPN1    |
| TFDP1 | EPS15   |
| TFDP1 | EPS15L1 |
| TFDP1 | ERAL1   |
| TFDP1 | ERBIN   |
| TFDP1 | ERCC1   |
| TFDP1 | ERCC2   |
| TFDP1 | ERCC3   |
| TFDP1 | ERCC6L  |
| TFDP1 | ERGIC1  |
| TFDP1 | ERGIC3  |
| TFDP1 | ERH     |
| TFDP1 | ERI3    |
| TFDP1 | ERLIN1  |
| TFDP1 | ESC02   |
| TFDP1 | ESD     |
| TFDP1 | ESPL1   |
| TFDP1 | ESRRA   |
| TFDP1 | ETF1    |
| TFDP1 | ETFA    |
| TFDP1 | ETV5    |
| TFDP1 | EWSR1   |
| TFDP1 | EX0C1   |
| TFDP1 | EX0C5   |
| TFDP1 | EX0C6   |
| TFDP1 | EX0G    |
| TFDP1 | EX0SC1  |
| TFDP1 | EX0SC10 |
| TFDP1 | EX0SC2  |
| TFDP1 | EX0SC8  |
| TFDP1 | EX0SC9  |
| TFDP1 | EZH2    |
| TFDP1 | EZR     |
| TFDP1 | FAAP20  |
| TFDP1 | FAAP24  |
| TFDP1 | FADD    |
| TFDP1 | FADS3   |
| TFDP1 | FAF1    |
| TFDP1 | FAF2    |
| TFDP1 | FAHD2A  |
| TFDP1 | FAIM    |
| TFDP1 | FAM104A |
| TFDP1 | FAM107B |
| TFDP1 | FAM110A |
| TFDP1 | FAM111A |
| TFDP1 | FAM111B |
| TFDP1 | FAM122B |
| TFDP1 | FAM126A |
| TFDP1 | FAM129A |



|       |          |
|-------|----------|
| TFDP1 | FAM133B  |
| TFDP1 | FAM135A  |
| TFDP1 | FAM149B1 |
| TFDP1 | FAM185A  |
| TFDP1 | FAM192A  |
| TFDP1 | FAM200A  |
| TFDP1 | FAM204A  |
| TFDP1 | FAM207A  |
| TFDP1 | FAM208A  |
| TFDP1 | FAM208B  |
| TFDP1 | FAM213A  |
| TFDP1 | FAM217B  |
| TFDP1 | FAM219B  |
| TFDP1 | FAM221A  |
| TFDP1 | FAM24B   |
| TFDP1 | FAM32A   |
| TFDP1 | FAM49B   |
| TFDP1 | FAM50A   |
| TFDP1 | FAM69A   |
| TFDP1 | FAM76A   |
| TFDP1 | FAM76B   |
| TFDP1 | FAM81A   |
| TFDP1 | FAM96A   |
| TFDP1 | FAM98C   |
| TFDP1 | FANCA    |
| TFDP1 | FANCB    |
| TFDP1 | FANCD2   |
| TFDP1 | FANCE    |
| TFDP1 | FANCG    |
| TFDP1 | FANCI    |
| TFDP1 | FANCL    |
| TFDP1 | FARP2    |
| TFDP1 | FASTK    |
| TFDP1 | FAU      |
| TFDP1 | FBL      |
| TFDP1 | FBXL19   |
| TFDP1 | FBX022   |
| TFDP1 | FBX033   |
| TFDP1 | FBX034   |
| TFDP1 | FBX038   |
| TFDP1 | FBX04    |
| TFDP1 | FBX045   |
| TFDP1 | FBX046   |
| TFDP1 | FBX048   |
| TFDP1 | FBX05    |
| TFDP1 | FBX07    |
| TFDP1 | FBX09    |
| TFDP1 | FBXW8    |
| TFDP1 | FCF1     |
| TFDP1 | FCH01    |

|       |          |
|-------|----------|
| TFDP1 | FCHSD2   |
| TFDP1 | FDFT1    |
| TFDP1 | FDPS     |
| TFDP1 | FEM1B    |
| TFDP1 | FEN1     |
| TFDP1 | FERMT3   |
| TFDP1 | FGD6     |
| TFDP1 | FGFR10P  |
| TFDP1 | FGFR10P2 |
| TFDP1 | FH       |
| TFDP1 | FHIT     |
| TFDP1 | FHOD1    |
| TFDP1 | FIBP     |
| TFDP1 | FIGNL1   |
| TFDP1 | FIP1L1   |
| TFDP1 | FIS1     |
| TFDP1 | FIZ1     |
| TFDP1 | FKBP1A   |
| TFDP1 | FKBP3    |
| TFDP1 | FKBP5    |
| TFDP1 | FLAD1    |
| TFDP1 | FLI1     |
| TFDP1 | FLOT1    |
| TFDP1 | FLOT2    |
| TFDP1 | FLVCR1   |
| TFDP1 | FN3KRP   |
| TFDP1 | FNBP1    |
| TFDP1 | FNIP1    |
| TFDP1 | FNTA     |
| TFDP1 | FNTB     |
| TFDP1 | FOXK2    |
| TFDP1 | FOXN1    |
| TFDP1 | FOXO1    |
| TFDP1 | FOXRED1  |
| TFDP1 | FPGS     |
| TFDP1 | FRA10AC1 |
| TFDP1 | FRG1     |
| TFDP1 | FRYL     |
| TFDP1 | FUBP1    |
| TFDP1 | FUBP3    |
| TFDP1 | FUNDC1   |
| TFDP1 | FURIN    |
| TFDP1 | FUS      |
| TFDP1 | FUZ      |
| TFDP1 | FXR2     |
| TFDP1 | FYTDD1   |
| TFDP1 | FZR1     |
| TFDP1 | G3BP1    |
| TFDP1 | G3BP2    |
| TFDP1 | G6PD     |

|       |            |
|-------|------------|
| TFDP1 | GABARAP    |
| TFDP1 | GABARAPL2  |
| TFDP1 | GABPB1     |
| TFDP1 | GABPB1-AS1 |
| TFDP1 | GABPB2     |
| TFDP1 | GADD45B    |
| TFDP1 | GAK        |
| TFDP1 | GALE       |
| TFDP1 | GALK1      |
| TFDP1 | GALNT7     |
| TFDP1 | GANAB      |
| TFDP1 | GAPDH      |
| TFDP1 | GART       |
| TFDP1 | GATAD2A    |
| TFDP1 | GATB       |
| TFDP1 | GBA        |
| TFDP1 | GCAT       |
| TFDP1 | GCDH       |
| TFDP1 | GCH1       |
| TFDP1 | GCHFR      |
| TFDP1 | GCLM       |
| TFDP1 | GCNT1      |
| TFDP1 | GDI1       |
| TFDP1 | GDI2       |
| TFDP1 | GEMIN2     |
| TFDP1 | GEN1       |
| TFDP1 | GFI1       |
| TFDP1 | GFOD1      |
| TFDP1 | GFOD2      |
| TFDP1 | GGCT       |
| TFDP1 | GGCX       |
| TFDP1 | GGH        |
| TFDP1 | GGNBP2     |
| TFDP1 | GGPS1      |
| TFDP1 | GHITM      |
| TFDP1 | GID8       |
| TFDP1 | GINM1      |
| TFDP1 | GINS1      |
| TFDP1 | GINS2      |
| TFDP1 | GINS3      |
| TFDP1 | GINS4      |
| TFDP1 | GJC1       |
| TFDP1 | GKAP1      |
| TFDP1 | GLA        |
| TFDP1 | GLI4       |
| TFDP1 | GL01       |
| TFDP1 | GLRX2      |
| TFDP1 | GLRX3      |
| TFDP1 | GLRX5      |
| TFDP1 | GLS        |

|       |          |
|-------|----------|
| TFDP1 | GLTP     |
| TFDP1 | GLUD1    |
| TFDP1 | GLUL     |
| TFDP1 | GLYCTK   |
| TFDP1 | GLYR1    |
| TFDP1 | GMCL1    |
| TFDP1 | GMDS     |
| TFDP1 | GMIP     |
| TFDP1 | GMNN     |
| TFDP1 | GMPS     |
| TFDP1 | GNA13    |
| TFDP1 | GNAI2    |
| TFDP1 | GNAI3    |
| TFDP1 | GNAS     |
| TFDP1 | GNB1     |
| TFDP1 | GNB1L    |
| TFDP1 | GNB2     |
| TFDP1 | GNB4     |
| TFDP1 | GNB5     |
| TFDP1 | GNL1     |
| TFDP1 | GOLGA7   |
| TFDP1 | GOLPH3   |
| TFDP1 | GOPC     |
| TFDP1 | GOSR1    |
| TFDP1 | GOSR2    |
| TFDP1 | GPALPP1  |
| TFDP1 | GPANK1   |
| TFDP1 | GPAT4    |
| TFDP1 | GPATCH11 |
| TFDP1 | GPATCH8  |
| TFDP1 | GPBP1    |
| TFDP1 | GPD2     |
| TFDP1 | GPI      |
| TFDP1 | GPK0W    |
| TFDP1 | GPN2     |
| TFDP1 | GPN3     |
| TFDP1 | GPR137   |
| TFDP1 | GPR180   |
| TFDP1 | GPT2     |
| TFDP1 | GRB2     |
| TFDP1 | GRIPAP1  |
| TFDP1 | GRK2     |
| TFDP1 | GRK4     |
| TFDP1 | GRPEL1   |
| TFDP1 | GRPEL2   |
| TFDP1 | GSAP     |
| TFDP1 | GSDMD    |
| TFDP1 | GSK3A    |
| TFDP1 | GSK3B    |
| TFDP1 | GSKIP    |

|       |          |
|-------|----------|
| TFDP1 | GSPT1    |
| TFDP1 | GSR      |
| TFDP1 | GST01    |
| TFDP1 | GTDC1    |
| TFDP1 | GTF2A2   |
| TFDP1 | GTF2E2   |
| TFDP1 | GTF2F1   |
| TFDP1 | GTF2I    |
| TFDP1 | GTF2IRD2 |
| TFDP1 | GTF3A    |
| TFDP1 | GTF3C2   |
| TFDP1 | GTF3C3   |
| TFDP1 | GTF3C5   |
| TFDP1 | GTPBP1   |
| TFDP1 | GTPBP3   |
| TFDP1 | GTPBP8   |
| TFDP1 | GTSF1    |
| TFDP1 | GUCD1    |
| TFDP1 | GUK1     |
| TFDP1 | GYG1     |
| TFDP1 | H1FX-AS1 |
| TFDP1 | H2AFJ    |
| TFDP1 | H2AFV    |
| TFDP1 | H2AFX    |
| TFDP1 | H2AFY    |
| TFDP1 | H2AFZ    |
| TFDP1 | H3F3A    |
| TFDP1 | H3F3B    |
| TFDP1 | HACD2    |
| TFDP1 | HACD3    |
| TFDP1 | HARS2    |
| TFDP1 | HAT1     |
| TFDP1 | HAUS1    |
| TFDP1 | HAUS2    |
| TFDP1 | HAUS3    |
| TFDP1 | HAUS4    |
| TFDP1 | HAUS5    |
| TFDP1 | HAUS6    |
| TFDP1 | HAUS7    |
| TFDP1 | HAUS8    |
| TFDP1 | HBS1L    |
| TFDP1 | HCCS     |
| TFDP1 | HCFC1    |
| TFDP1 | HCLS1    |
| TFDP1 | HCN3     |
| TFDP1 | HDAC1    |
| TFDP1 | HDAC2    |
| TFDP1 | HDAC6    |
| TFDP1 | HDGF     |
| TFDP1 | HDHD2    |

|       |           |
|-------|-----------|
| TFDP1 | HDLBP     |
| TFDP1 | HECTD4    |
| TFDP1 | HELLS     |
| TFDP1 | HENMT1    |
| TFDP1 | HERC1     |
| TFDP1 | HERC2     |
| TFDP1 | HERC3     |
| TFDP1 | HERC4     |
| TFDP1 | HES6      |
| TFDP1 | HEXIM2    |
| TFDP1 | HIGD1A    |
| TFDP1 | HIGD2A    |
| TFDP1 | HINT1     |
| TFDP1 | HINT2     |
| TFDP1 | HIRIP3    |
| TFDP1 | HIST1H1D  |
| TFDP1 | HIST1H1E  |
| TFDP1 | HIST1H2BK |
| TFDP1 | HIST1H2BN |
| TFDP1 | HIST1H3A  |
| TFDP1 | HIST1H4B  |
| TFDP1 | HIST1H4C  |
| TFDP1 | HIST1H4I  |
| TFDP1 | HIST2H2AC |
| TFDP1 | HIVEP1    |
| TFDP1 | HK1       |
| TFDP1 | HLTF      |
| TFDP1 | HMBS      |
| TFDP1 | HMCE5     |
| TFDP1 | HMG20B    |
| TFDP1 | HMGA1     |
| TFDP1 | HMGB1     |
| TFDP1 | HMGB2     |
| TFDP1 | HMGB3     |
| TFDP1 | HMGCR     |
| TFDP1 | HMGCS1    |
| TFDP1 | HMGN1     |
| TFDP1 | HMGN2     |
| TFDP1 | HMGN3     |
| TFDP1 | HMGXB3    |
| TFDP1 | HMGXB4    |
| TFDP1 | HNRNPA0   |
| TFDP1 | HNRNPA1   |
| TFDP1 | HNRNPA2B1 |
| TFDP1 | HNRNPA3   |
| TFDP1 | HNRNPAB   |
| TFDP1 | HNRNPC    |
| TFDP1 | HNRNPD    |
| TFDP1 | HNRNPF    |
| TFDP1 | HNRNPH1   |

|       |          |
|-------|----------|
| TFDP1 | HNRNPH3  |
| TFDP1 | HNRNPK   |
| TFDP1 | HNRNPL   |
| TFDP1 | HNRNPM   |
| TFDP1 | HNRNPR   |
| TFDP1 | HNRNPU   |
| TFDP1 | HNRNPUL1 |
| TFDP1 | HNRNPUL2 |
| TFDP1 | H0XA7    |
| TFDP1 | HP1BP3   |
| TFDP1 | HPF1     |
| TFDP1 | HPRT1    |
| TFDP1 | HPS5     |
| TFDP1 | HRAS     |
| TFDP1 | HRK      |
| TFDP1 | HSD17B12 |
| TFDP1 | HSDL2    |
| TFDP1 | HSF1     |
| TFDP1 | HSF2     |
| TFDP1 | HSP90AA1 |
| TFDP1 | HSP90AB1 |
| TFDP1 | HSPA2    |
| TFDP1 | HSPA4    |
| TFDP1 | HSPA8    |
| TFDP1 | HSPA9    |
| TFDP1 | HSPB11   |
| TFDP1 | HSPBAP1  |
| TFDP1 | HSPBP1   |
| TFDP1 | HSPD1    |
| TFDP1 | HSPH1    |
| TFDP1 | HTATSF1  |
| TFDP1 | HUS1     |
| TFDP1 | HYI      |
| TFDP1 | IARS2    |
| TFDP1 | ICE2     |
| TFDP1 | ICMT     |
| TFDP1 | ID2      |
| TFDP1 | IDH2     |
| TFDP1 | IDH3A    |
| TFDP1 | IDH3B    |
| TFDP1 | IDI1     |
| TFDP1 | IFI16    |
| TFDP1 | IFNGR2   |
| TFDP1 | IFT22    |
| TFDP1 | IFT52    |
| TFDP1 | IFT74    |
| TFDP1 | IFT80    |
| TFDP1 | IGBP1    |
| TFDP1 | IGF2BP1  |
| TFDP1 | IGF2BP3  |

|       |          |
|-------|----------|
| TFDP1 | IKBKB    |
| TFDP1 | IKBKE    |
| TFDP1 | IKBKG    |
| TFDP1 | IKZF1    |
| TFDP1 | IKZF3    |
| TFDP1 | IL4R     |
| TFDP1 | ILF2     |
| TFDP1 | ILF3     |
| TFDP1 | ILKAP    |
| TFDP1 | IMMP1L   |
| TFDP1 | IMP3     |
| TFDP1 | IMPA2    |
| TFDP1 | IMPACT   |
| TFDP1 | IMPDH2   |
| TFDP1 | INAFM1   |
| TFDP1 | INF2     |
| TFDP1 | ING1     |
| TFDP1 | ING2     |
| TFDP1 | ING3     |
| TFDP1 | ING4     |
| TFDP1 | INIP     |
| TFDP1 | IN080C   |
| TFDP1 | INPP1    |
| TFDP1 | INPP5B   |
| TFDP1 | INSIG1   |
| TFDP1 | INSIG2   |
| TFDP1 | INSR     |
| TFDP1 | INTS10   |
| TFDP1 | INTS4    |
| TFDP1 | INTS7    |
| TFDP1 | INTS8    |
| TFDP1 | IP6K2    |
| TFDP1 | IP011    |
| TFDP1 | IP09     |
| TFDP1 | IPPK     |
| TFDP1 | IQCB1    |
| TFDP1 | IQCD     |
| TFDP1 | IQGAP1   |
| TFDP1 | IQGAP3   |
| TFDP1 | IREB2    |
| TFDP1 | IRF1     |
| TFDP1 | IRF2     |
| TFDP1 | IRF2BP1  |
| TFDP1 | IRF8     |
| TFDP1 | IST1     |
| TFDP1 | ISY1     |
| TFDP1 | ISYNA1   |
| TFDP1 | ITGB1    |
| TFDP1 | ITGB1BP1 |
| TFDP1 | ITPA     |



|       |          |
|-------|----------|
| TFDP1 | ITPKB    |
| TFDP1 | ITPR3    |
| TFDP1 | ITSN2    |
| TFDP1 | IWS1     |
| TFDP1 | JADE1    |
| TFDP1 | JADE2    |
| TFDP1 | JAGN1    |
| TFDP1 | JAK1     |
| TFDP1 | JMJD1C   |
| TFDP1 | KANK1    |
| TFDP1 | KANK2    |
| TFDP1 | KANSL1   |
| TFDP1 | KANSL1L  |
| TFDP1 | KANSL2   |
| TFDP1 | KANSL3   |
| TFDP1 | KATNA1   |
| TFDP1 | KATNAL1  |
| TFDP1 | KATNB1   |
| TFDP1 | KATNBL1  |
| TFDP1 | KBTBD4   |
| TFDP1 | KBTBD7   |
| TFDP1 | KCMF1    |
| TFDP1 | KCNAB2   |
| TFDP1 | KCNK12   |
| TFDP1 | KCNMB4   |
| TFDP1 | KCTD18   |
| TFDP1 | KCTD20   |
| TFDP1 | KCTD5    |
| TFDP1 | KDELC2   |
| TFDP1 | KDM1A    |
| TFDP1 | KDM1B    |
| TFDP1 | KDM2A    |
| TFDP1 | KDM2B    |
| TFDP1 | KDM5A    |
| TFDP1 | KEAP1    |
| TFDP1 | KHDRBS1  |
| TFDP1 | KHNYN    |
| TFDP1 | KHSRP    |
| TFDP1 | KIAA0586 |
| TFDP1 | KIAA1468 |
| TFDP1 | KIAA1586 |
| TFDP1 | KIF11    |
| TFDP1 | KIF13A   |
| TFDP1 | KIF16B   |
| TFDP1 | KIF1BP   |
| TFDP1 | KIF20B   |
| TFDP1 | KIF22    |
| TFDP1 | KIF2A    |
| TFDP1 | KIFAP3   |
| TFDP1 | KIFC1    |

|       |         |
|-------|---------|
| TFDP1 | KLC1    |
| TFDP1 | KLF10   |
| TFDP1 | KLHDC2  |
| TFDP1 | KLHDC3  |
| TFDP1 | KLHL12  |
| TFDP1 | KLHL22  |
| TFDP1 | KLHL23  |
| TFDP1 | KLHL24  |
| TFDP1 | KLHL42  |
| TFDP1 | KLHL5   |
| TFDP1 | KLHL7   |
| TFDP1 | KMT2B   |
| TFDP1 | KMT5A   |
| TFDP1 | KMT5C   |
| TFDP1 | KNTC1   |
| TFDP1 | KPNA1   |
| TFDP1 | KPNA2   |
| TFDP1 | KPNA3   |
| TFDP1 | KPNA6   |
| TFDP1 | KPNB1   |
| TFDP1 | KRAS    |
| TFDP1 | KREMEN2 |
| TFDP1 | KRIT1   |
| TFDP1 | KTN1    |
| TFDP1 | KXD1    |
| TFDP1 | KYAT1   |
| TFDP1 | KYAT3   |
| TFDP1 | L3MBTL2 |
| TFDP1 | LACC1   |
| TFDP1 | LACTB2  |
| TFDP1 | LAGE3   |
| TFDP1 | LAMP1   |
| TFDP1 | LAMTOR2 |
| TFDP1 | LAMTOR3 |
| TFDP1 | LAMTOR4 |
| TFDP1 | LAP3    |
| TFDP1 | LARP7   |
| TFDP1 | LAS1L   |
| TFDP1 | LBR     |
| TFDP1 | LCMT1   |
| TFDP1 | LCMT2   |
| TFDP1 | LCP1    |
| TFDP1 | LDHA    |
| TFDP1 | LDHB    |
| TFDP1 | LEF1    |
| TFDP1 | LEMD2   |
| TFDP1 | LENG1   |
| TFDP1 | LETM2   |
| TFDP1 | LIG1    |
| TFDP1 | LIMS1   |

|       |           |
|-------|-----------|
| TFDP1 | LIN52     |
| TFDP1 | LIN54     |
| TFDP1 | LIN7C     |
| TFDP1 | LIN9      |
| TFDP1 | LINC00467 |
| TFDP1 | LINC00847 |
| TFDP1 | LINC01006 |
| TFDP1 | LINC01184 |
| TFDP1 | LMAN2     |
| TFDP1 | LMBR1     |
| TFDP1 | LMBRD2    |
| TFDP1 | LMCD1     |
| TFDP1 | LMNB1     |
| TFDP1 | LMNB2     |
| TFDP1 | LONP1     |
| TFDP1 | LOXL2     |
| TFDP1 | LPAR2     |
| TFDP1 | LPCAT3    |
| TFDP1 | LPGAT1    |
| TFDP1 | LPXN      |
| TFDP1 | LRBA      |
| TFDP1 | LRCH1     |
| TFDP1 | LRIF1     |
| TFDP1 | LRR1      |
| TFDP1 | LRRC1     |
| TFDP1 | LRRC14    |
| TFDP1 | LRRC28    |
| TFDP1 | LRRC40    |
| TFDP1 | LRRC45    |
| TFDP1 | LRRC58    |
| TFDP1 | LRRC59    |
| TFDP1 | LRRC8A    |
| TFDP1 | LRRCC1    |
| TFDP1 | LRRFIP2   |
| TFDP1 | LRRK1     |
| TFDP1 | LSG1      |
| TFDP1 | LSM1      |
| TFDP1 | LSM14A    |
| TFDP1 | LSM2      |
| TFDP1 | LSM3      |
| TFDP1 | LSM4      |
| TFDP1 | LSM5      |
| TFDP1 | LSM6      |
| TFDP1 | LSM8      |
| TFDP1 | LTA4H     |
| TFDP1 | LTN1      |
| TFDP1 | LUC7L     |
| TFDP1 | LUC7L2    |
| TFDP1 | LUC7L3    |
| TFDP1 | LYPLA1    |

|       |           |
|-------|-----------|
| TFDP1 | LYPLA2    |
| TFDP1 | LYRM1     |
| TFDP1 | LYRM2     |
| TFDP1 | LZIC      |
| TFDP1 | M6PR      |
| TFDP1 | MAD1L1    |
| TFDP1 | MAD2L1    |
| TFDP1 | MAD2L1BP  |
| TFDP1 | MAD2L2    |
| TFDP1 | MAEA      |
| TFDP1 | MAGED2    |
| TFDP1 | MAGEF1    |
| TFDP1 | MAGOH     |
| TFDP1 | MAGOHB    |
| TFDP1 | MALSU1    |
| TFDP1 | MAML1     |
| TFDP1 | MAN2A1    |
| TFDP1 | MAP2K1    |
| TFDP1 | MAP2K2    |
| TFDP1 | MAP3K11   |
| TFDP1 | MAP3K2    |
| TFDP1 | MAP3K3    |
| TFDP1 | MAP3K7    |
| TFDP1 | MAP3K8    |
| TFDP1 | MAP4K1    |
| TFDP1 | MAP4K2    |
| TFDP1 | MAP4K4    |
| TFDP1 | MAP7D1    |
| TFDP1 | MAP7D3    |
| TFDP1 | MAPK1     |
| TFDP1 | MAPK14    |
| TFDP1 | MAPK1IP1L |
| TFDP1 | MAPK8     |
| TFDP1 | MAPK9     |
| TFDP1 | MAPKAP1   |
| TFDP1 | MAPRE1    |
| TFDP1 | MAPRE2    |
| TFDP1 | MARCH7    |
| TFDP1 | MARCKSL1  |
| TFDP1 | MARK3     |
| TFDP1 | MASTL     |
| TFDP1 | MAT2A     |
| TFDP1 | MAU2      |
| TFDP1 | MAX       |
| TFDP1 | MAZ       |
| TFDP1 | MBD1      |
| TFDP1 | MBD2      |
| TFDP1 | MBIP      |
| TFDP1 | MBNL1     |
| TFDP1 | MBNL3     |

|       |           |
|-------|-----------|
| TFDP1 | MBOAT2    |
| TFDP1 | MCAT      |
| TFDP1 | MCM10     |
| TFDP1 | MCM2      |
| TFDP1 | MCM3      |
| TFDP1 | MCM3AP    |
| TFDP1 | MCM4      |
| TFDP1 | MCM5      |
| TFDP1 | MCM6      |
| TFDP1 | MCM7      |
| TFDP1 | MCM8      |
| TFDP1 | MCMBP     |
| TFDP1 | MCRS1     |
| TFDP1 | MCTS1     |
| TFDP1 | MCU       |
| TFDP1 | MCUR1     |
| TFDP1 | MDH1      |
| TFDP1 | MDM1      |
| TFDP1 | MDM2      |
| TFDP1 | MDM4      |
| TFDP1 | MEA1      |
| TFDP1 | MEAF6     |
| TFDP1 | MECP2     |
| TFDP1 | MECR      |
| TFDP1 | MED11     |
| TFDP1 | MED15     |
| TFDP1 | MED17     |
| TFDP1 | MED18     |
| TFDP1 | MED21     |
| TFDP1 | MED25     |
| TFDP1 | MED27     |
| TFDP1 | MED28     |
| TFDP1 | MED30     |
| TFDP1 | MED4      |
| TFDP1 | MED6      |
| TFDP1 | MED7      |
| TFDP1 | MEF2A     |
| TFDP1 | MEF2C     |
| TFDP1 | MEIOG     |
| TFDP1 | MELK      |
| TFDP1 | MEMO1     |
| TFDP1 | MEN1      |
| TFDP1 | MEST      |
| TFDP1 | METAP1    |
| TFDP1 | METAP2    |
| TFDP1 | METTLL17  |
| TFDP1 | METTLL21A |
| TFDP1 | METTLL2A  |
| TFDP1 | METTLL2B  |
| TFDP1 | METTLL3   |

|       |             |
|-------|-------------|
| TFDP1 | METTL4      |
| TFDP1 | METTL9      |
| TFDP1 | MFAP1       |
| TFDP1 | MFF         |
| TFDP1 | MFGE8       |
| TFDP1 | MFHAS1      |
| TFDP1 | MFN1        |
| TFDP1 | MFSD11      |
| TFDP1 | MFSD14B     |
| TFDP1 | MFSD14C     |
| TFDP1 | MGA         |
| TFDP1 | MGME1       |
| TFDP1 | MGMT        |
| TFDP1 | MICU1       |
| TFDP1 | MICU2       |
| TFDP1 | MID1IP1     |
| TFDP1 | MIER1       |
| TFDP1 | MIF         |
| TFDP1 | MIF4GD      |
| TFDP1 | MINOS1      |
| TFDP1 | MINPP1      |
| TFDP1 | MIR181A1HG  |
| TFDP1 | MIS12       |
| TFDP1 | MIS18A      |
| TFDP1 | MIS18BP1    |
| TFDP1 | MKI67       |
| TFDP1 | MKL1        |
| TFDP1 | MKNK2       |
| TFDP1 | MKS1        |
| TFDP1 | MLF2        |
| TFDP1 | MLH1        |
| TFDP1 | MLLT1       |
| TFDP1 | MLLT10      |
| TFDP1 | MLLT11      |
| TFDP1 | MLST8       |
| TFDP1 | MLXIP       |
| TFDP1 | MMAB        |
| TFDP1 | MMADHC      |
| TFDP1 | MMD         |
| TFDP1 | MME         |
| TFDP1 | MMS19       |
| TFDP1 | MMS22L      |
| TFDP1 | MND1        |
| TFDP1 | MNS1        |
| TFDP1 | MOB1A       |
| TFDP1 | MOCS2       |
| TFDP1 | MORC4       |
| TFDP1 | MORF4L1     |
| TFDP1 | MORF4L2     |
| TFDP1 | MORF4L2-AS1 |

|       |          |
|-------|----------|
| TFDP1 | MOSPD2   |
| TFDP1 | MOSPD3   |
| TFDP1 | MOV10    |
| TFDP1 | MPC1     |
| TFDP1 | MPC2     |
| TFDP1 | MPDU1    |
| TFDP1 | MPHOSPH6 |
| TFDP1 | MPHOSPH8 |
| TFDP1 | MPI      |
| TFDP1 | MPLKIP   |
| TFDP1 | MPND     |
| TFDP1 | MPP5     |
| TFDP1 | MPP6     |
| TFDP1 | MPRIP    |
| TFDP1 | MR0H1    |
| TFDP1 | MRPL11   |
| TFDP1 | MRPL12   |
| TFDP1 | MRPL13   |
| TFDP1 | MRPL14   |
| TFDP1 | MRPL17   |
| TFDP1 | MRPL18   |
| TFDP1 | MRPL23   |
| TFDP1 | MRPL28   |
| TFDP1 | MRPL32   |
| TFDP1 | MRPL33   |
| TFDP1 | MRPL34   |
| TFDP1 | MRPL35   |
| TFDP1 | MRPL37   |
| TFDP1 | MRPL39   |
| TFDP1 | MRPL4    |
| TFDP1 | MRPL40   |
| TFDP1 | MRPL44   |
| TFDP1 | MRPL45   |
| TFDP1 | MRPL47   |
| TFDP1 | MRPL48   |
| TFDP1 | MRPL49   |
| TFDP1 | MRPL51   |
| TFDP1 | MRPL52   |
| TFDP1 | MRPL57   |
| TFDP1 | MRPS14   |
| TFDP1 | MRPS15   |
| TFDP1 | MRPS16   |
| TFDP1 | MRPS18B  |
| TFDP1 | MRPS2    |
| TFDP1 | MRPS21   |
| TFDP1 | MRPS22   |
| TFDP1 | MRPS23   |
| TFDP1 | MRPS25   |
| TFDP1 | MRPS31   |
| TFDP1 | MRPS33   |

|       |         |
|-------|---------|
| TFDP1 | MRPS5   |
| TFDP1 | MRPS6   |
| TFDP1 | MRPS7   |
| TFDP1 | MRRF    |
| TFDP1 | MRS2    |
| TFDP1 | MSANTD3 |
| TFDP1 | MSANTD4 |
| TFDP1 | MSH2    |
| TFDP1 | MSH3    |
| TFDP1 | MSH6    |
| TFDP1 | MSI2    |
| TFDP1 | MSL1    |
| TFDP1 | MSM01   |
| TFDP1 | MSRA    |
| TFDP1 | MSRB2   |
| TFDP1 | MTA1    |
| TFDP1 | MTA2    |
| TFDP1 | MTA3    |
| TFDP1 | MTCH2   |
| TFDP1 | MTDH    |
| TFDP1 | MTERF1  |
| TFDP1 | MTERF3  |
| TFDP1 | MTF2    |
| TFDP1 | MTFMT   |
| TFDP1 | MTFP1   |
| TFDP1 | MTFR1L  |
| TFDP1 | MTFR2   |
| TFDP1 | MTHFD1  |
| TFDP1 | MTHFD2L |
| TFDP1 | MTMR14  |
| TFDP1 | MTMR4   |
| TFDP1 | MTMR6   |
| TFDP1 | MT01    |
| TFDP1 | MTOR    |
| TFDP1 | MTPAP   |
| TFDP1 | MTRF1   |
| TFDP1 | MTX1    |
| TFDP1 | MTX2    |
| TFDP1 | MUTYH   |
| TFDP1 | MVB12A  |
| TFDP1 | MVK     |
| TFDP1 | MX1     |
| TFDP1 | MXD3    |
| TFDP1 | MYBL1   |
| TFDP1 | MYBL2   |
| TFDP1 | MYCBP   |
| TFDP1 | MYH10   |
| TFDP1 | MYH9    |
| TFDP1 | MYL12B  |
| TFDP1 | MYL6    |



|       |         |
|-------|---------|
| TFDP1 | MYL6B   |
| TFDP1 | MYNN    |
| TFDP1 | MY01C   |
| TFDP1 | MY06    |
| TFDP1 | MYP0P   |
| TFDP1 | MZT1    |
| TFDP1 | MZT2A   |
| TFDP1 | MZT2B   |
| TFDP1 | N4BP2   |
| TFDP1 | N4BP3   |
| TFDP1 | NAA10   |
| TFDP1 | NAA20   |
| TFDP1 | NAA35   |
| TFDP1 | NAA38   |
| TFDP1 | NAA40   |
| TFDP1 | NAA50   |
| TFDP1 | NAB1    |
| TFDP1 | NABP2   |
| TFDP1 | NACA    |
| TFDP1 | NADK    |
| TFDP1 | NADK2   |
| TFDP1 | NAE1    |
| TFDP1 | NAGK    |
| TFDP1 | NAIF1   |
| TFDP1 | NAP1L1  |
| TFDP1 | NAP1L4  |
| TFDP1 | NAPA    |
| TFDP1 | NAPG    |
| TFDP1 | NARF    |
| TFDP1 | NARFL   |
| TFDP1 | NASP    |
| TFDP1 | NAXD    |
| TFDP1 | NBEA    |
| TFDP1 | NBEAL1  |
| TFDP1 | NBN     |
| TFDP1 | NBPF1   |
| TFDP1 | NCAPD3  |
| TFDP1 | NCAPG   |
| TFDP1 | NCAPG2  |
| TFDP1 | NCAPH   |
| TFDP1 | NCAPH2  |
| TFDP1 | NCBP1   |
| TFDP1 | NCF4    |
| TFDP1 | NCKAP1L |
| TFDP1 | NCKIPSD |
| TFDP1 | NCL     |
| TFDP1 | NC0A2   |
| TFDP1 | NC0A4   |
| TFDP1 | NC0A5   |
| TFDP1 | NDC1    |

|       |          |
|-------|----------|
| TFDP1 | NDC80    |
| TFDP1 | NDRG4    |
| TFDP1 | NDUFA12  |
| TFDP1 | NDUFA13  |
| TFDP1 | NDUFA2   |
| TFDP1 | NDUFA4   |
| TFDP1 | NDUFA5   |
| TFDP1 | NDUFA6   |
| TFDP1 | NDUFAF1  |
| TFDP1 | NDUFAF3  |
| TFDP1 | NDUFAF6  |
| TFDP1 | NDUFB10  |
| TFDP1 | NDUFB4   |
| TFDP1 | NDUFB6   |
| TFDP1 | NDUFB9   |
| TFDP1 | NDUFC1   |
| TFDP1 | NDUFS1   |
| TFDP1 | NDUFS2   |
| TFDP1 | NDUFS4   |
| TFDP1 | NDUFS6   |
| TFDP1 | NDUFS7   |
| TFDP1 | NDUFS8   |
| TFDP1 | NDUFV1   |
| TFDP1 | NDUFV3   |
| TFDP1 | NECAP2   |
| TFDP1 | NEDD1    |
| TFDP1 | NEIL1    |
| TFDP1 | NEIL3    |
| TFDP1 | NEK1     |
| TFDP1 | NELFA    |
| TFDP1 | NELFB    |
| TFDP1 | NEMP1    |
| TFDP1 | NEMP2    |
| TFDP1 | NENF     |
| TFDP1 | NFAT5    |
| TFDP1 | NFATC1   |
| TFDP1 | NFATC2   |
| TFDP1 | NFATC2IP |
| TFDP1 | NFATC3   |
| TFDP1 | NFATC4   |
| TFDP1 | NFE2L2   |
| TFDP1 | NFKBIB   |
| TFDP1 | NFKBID   |
| TFDP1 | NFKBIL1  |
| TFDP1 | NFS1     |
| TFDP1 | NFYA     |
| TFDP1 | NFYB     |
| TFDP1 | NFYC     |
| TFDP1 | NGDN     |
| TFDP1 | NIF3L1   |

|       |           |
|-------|-----------|
| TFDP1 | NIPBL     |
| TFDP1 | NIPSNAP3A |
| TFDP1 | NIT1      |
| TFDP1 | NKAP      |
| TFDP1 | NKIRAS2   |
| TFDP1 | NKRF      |
| TFDP1 | NKTR      |
| TFDP1 | NLK       |
| TFDP1 | NLRC3     |
| TFDP1 | NMD3      |
| TFDP1 | NME6      |
| TFDP1 | NMI       |
| TFDP1 | NMRAL1    |
| TFDP1 | NMT1      |
| TFDP1 | NMU       |
| TFDP1 | NNT       |
| TFDP1 | NOB1      |
| TFDP1 | NOC4L     |
| TFDP1 | NOL11     |
| TFDP1 | NOL8      |
| TFDP1 | NONO      |
| TFDP1 | NOP10     |
| TFDP1 | NOP14     |
| TFDP1 | NOP56     |
| TFDP1 | NOP58     |
| TFDP1 | NOSIP     |
| TFDP1 | NPAT      |
| TFDP1 | NPM1      |
| TFDP1 | NPTX2     |
| TFDP1 | NQO2      |
| TFDP1 | NR3C1     |
| TFDP1 | NRBF2     |
| TFDP1 | NRDC      |
| TFDP1 | NREP      |
| TFDP1 | NRF1      |
| TFDP1 | NRM       |
| TFDP1 | NRSN2     |
| TFDP1 | NSA2      |
| TFDP1 | NSD1      |
| TFDP1 | NSDHL     |
| TFDP1 | NSFL1C    |
| TFDP1 | NSL1      |
| TFDP1 | NSMCE4A   |
| TFDP1 | NSRP1     |
| TFDP1 | NSUN4     |
| TFDP1 | NSUN6     |
| TFDP1 | NT5DC1    |
| TFDP1 | NTAN1     |
| TFDP1 | NTMT1     |
| TFDP1 | NUB1      |

|       |            |
|-------|------------|
| TFDP1 | NUBP1      |
| TFDP1 | NUBP2      |
| TFDP1 | NUBPL      |
| TFDP1 | NUCB1      |
| TFDP1 | NUCKS1     |
| TFDP1 | NUDC       |
| TFDP1 | NUDCD2     |
| TFDP1 | NUDT15     |
| TFDP1 | NUDT16L1   |
| TFDP1 | NUDT19     |
| TFDP1 | NUDT21     |
| TFDP1 | NUDT8      |
| TFDP1 | NUMA1      |
| TFDP1 | NUP107     |
| TFDP1 | NUP133     |
| TFDP1 | NUP155     |
| TFDP1 | NUP188     |
| TFDP1 | NUP210     |
| TFDP1 | NUP214     |
| TFDP1 | NUP43      |
| TFDP1 | NUP50      |
| TFDP1 | NUP58      |
| TFDP1 | NUP62      |
| TFDP1 | NUP85      |
| TFDP1 | NUP88      |
| TFDP1 | NUP93      |
| TFDP1 | NUP98      |
| TFDP1 | NUPL2      |
| TFDP1 | NUSAP1     |
| TFDP1 | NUTF2      |
| TFDP1 | NUTM2A-AS1 |
| TFDP1 | NUTM2B-AS1 |
| TFDP1 | NVL        |
| TFDP1 | NXF1       |
| TFDP1 | NXT1       |
| TFDP1 | OARD1      |
| TFDP1 | OAT        |
| TFDP1 | OAZ1       |
| TFDP1 | OCIAD1     |
| TFDP1 | ODF2       |
| TFDP1 | OGFOD1     |
| TFDP1 | OGFOD2     |
| TFDP1 | OGFRL1     |
| TFDP1 | OGG1       |
| TFDP1 | OLA1       |
| TFDP1 | OPA1       |
| TFDP1 | OPA3       |
| TFDP1 | ORC1       |
| TFDP1 | ORC3       |
| TFDP1 | ORC4       |

|       |          |
|-------|----------|
| TFDP1 | ORC5     |
| TFDP1 | ORC6     |
| TFDP1 | ORMDL1   |
| TFDP1 | OSBPL11  |
| TFDP1 | OSBPL2   |
| TFDP1 | OSBPL8   |
| TFDP1 | OSBPL9   |
| TFDP1 | OST4     |
| TFDP1 | OSTF1    |
| TFDP1 | OTUD1    |
| TFDP1 | OTULIN   |
| TFDP1 | OXCT1    |
| TFDP1 | OXR1     |
| TFDP1 | OXSRI    |
| TFDP1 | PAAF1    |
| TFDP1 | PABPC1   |
| TFDP1 | PABPC4   |
| TFDP1 | PACS1    |
| TFDP1 | PACSIN2  |
| TFDP1 | PAF1     |
| TFDP1 | PAFAH1B1 |
| TFDP1 | PAFAH1B2 |
| TFDP1 | PAFAH1B3 |
| TFDP1 | PAGR1    |
| TFDP1 | PAICS    |
| TFDP1 | PAIP1    |
| TFDP1 | PAIP2    |
| TFDP1 | PAK1     |
| TFDP1 | PAK2     |
| TFDP1 | PAK4     |
| TFDP1 | PALLD    |
| TFDP1 | PAN2     |
| TFDP1 | PAN3     |
| TFDP1 | PANK2    |
| TFDP1 | PANK3    |
| TFDP1 | PANX1    |
| TFDP1 | PAPOLA   |
| TFDP1 | PAPSS1   |
| TFDP1 | PAQR4    |
| TFDP1 | PARD6A   |
| TFDP1 | PARK7    |
| TFDP1 | PARN     |
| TFDP1 | PARP1    |
| TFDP1 | PARP2    |
| TFDP1 | PARP3    |
| TFDP1 | PATL1    |
| TFDP1 | PATZ1    |
| TFDP1 | PAWR     |
| TFDP1 | PAX5     |
| TFDP1 | PAXBP1   |

|       |            |
|-------|------------|
| TFDP1 | PAXIP1     |
| TFDP1 | PAXIP1-AS1 |
| TFDP1 | PBK        |
| TFDP1 | PBRM1      |
| TFDP1 | PBX2       |
| TFDP1 | PBX3       |
| TFDP1 | PCBD1      |
| TFDP1 | PCBP1      |
| TFDP1 | PCBP2      |
| TFDP1 | PCF11      |
| TFDP1 | PCGF5      |
| TFDP1 | PCGF6      |
| TFDP1 | PCIF1      |
| TFDP1 | PCMT1      |
| TFDP1 | PCNA       |
| TFDP1 | PCNP       |
| TFDP1 | PCNT       |
| TFDP1 | PCYT1A     |
| TFDP1 | PCYT2      |
| TFDP1 | PDAP1      |
| TFDP1 | PDCD10     |
| TFDP1 | PDCD6      |
| TFDP1 | PDCL       |
| TFDP1 | PDE6D      |
| TFDP1 | PDHA1      |
| TFDP1 | PDHX       |
| TFDP1 | PDIA3      |
| TFDP1 | PDIA6      |
| TFDP1 | PDK2       |
| TFDP1 | PDK3       |
| TFDP1 | PDLIM1     |
| TFDP1 | PDLIM7     |
| TFDP1 | PDPK1      |
| TFDP1 | PDS5A      |
| TFDP1 | PDS5B      |
| TFDP1 | PDSS2      |
| TFDP1 | PEA15      |
| TFDP1 | PEF1       |
| TFDP1 | PEG10      |
| TFDP1 | PELP1      |
| TFDP1 | PER2       |
| TFDP1 | PET100     |
| TFDP1 | PET117     |
| TFDP1 | PEX11B     |
| TFDP1 | PEX16      |
| TFDP1 | PEX2       |
| TFDP1 | PEX5       |
| TFDP1 | PFDN1      |
| TFDP1 | PFDN2      |
| TFDP1 | PFDN4      |

|       |         |
|-------|---------|
| TFDP1 | PFDN6   |
| TFDP1 | PFKP    |
| TFDP1 | PFN1    |
| TFDP1 | PGAM1   |
| TFDP1 | PGAM5   |
| TFDP1 | PGAP2   |
| TFDP1 | PGD     |
| TFDP1 | PGGT1B  |
| TFDP1 | PGK1    |
| TFDP1 | PGM2    |
| TFDP1 | PGP     |
| TFDP1 | PGRMC1  |
| TFDP1 | PGS1    |
| TFDP1 | PHACTR4 |
| TFDP1 | PHAX    |
| TFDP1 | PHB2    |
| TFDP1 | PHC1    |
| TFDP1 | PHF11   |
| TFDP1 | PHF13   |
| TFDP1 | PHF14   |
| TFDP1 | PHF19   |
| TFDP1 | PHF20   |
| TFDP1 | PHF3    |
| TFDP1 | PHF5A   |
| TFDP1 | PHF6    |
| TFDP1 | PHF7    |
| TFDP1 | PHGDH   |
| TFDP1 | PHIP    |
| TFDP1 | PHKG2   |
| TFDP1 | PHPT1   |
| TFDP1 | PHYHD1  |
| TFDP1 | PI4KA   |
| TFDP1 | PI4KB   |
| TFDP1 | PIAS1   |
| TFDP1 | PIAS4   |
| TFDP1 | PIDD1   |
| TFDP1 | PIGC    |
| TFDP1 | PIGF    |
| TFDP1 | PIGL    |
| TFDP1 | PIGQ    |
| TFDP1 | PIGV    |
| TFDP1 | PIK3AP1 |
| TFDP1 | PIK3C3  |
| TFDP1 | PIM1    |
| TFDP1 | PIN1    |
| TFDP1 | PIN4    |
| TFDP1 | PIP4K2A |
| TFDP1 | PIP5K1A |
| TFDP1 | PITPNC1 |
| TFDP1 | PKM     |

|       |         |
|-------|---------|
| TFDP1 | PKMYT1  |
| TFDP1 | PKN1    |
| TFDP1 | PKN2    |
| TFDP1 | PKN0X1  |
| TFDP1 | PLA2G15 |
| TFDP1 | PLAA    |
| TFDP1 | PLEKHA3 |
| TFDP1 | PLEKHF2 |
| TFDP1 | PLEKHJ1 |
| TFDP1 | PLEKH01 |
| TFDP1 | PLK4    |
| TFDP1 | PLPP1   |
| TFDP1 | PLRG1   |
| TFDP1 | PLSCR1  |
| TFDP1 | PMAIP1  |
| TFDP1 | PMF1    |
| TFDP1 | PMM1    |
| TFDP1 | PMPCB   |
| TFDP1 | PMS1    |
| TFDP1 | PMVK    |
| TFDP1 | PNISR   |
| TFDP1 | PNKD    |
| TFDP1 | PNN     |
| TFDP1 | PNPLA4  |
| TFDP1 | PNPLA6  |
| TFDP1 | PNPLA8  |
| TFDP1 | PNRC2   |
| TFDP1 | POC1A   |
| TFDP1 | POC1B   |
| TFDP1 | POC5    |
| TFDP1 | POFUT1  |
| TFDP1 | POGZ    |
| TFDP1 | POLA1   |
| TFDP1 | POLA2   |
| TFDP1 | POLD1   |
| TFDP1 | POLD3   |
| TFDP1 | POLDIP3 |
| TFDP1 | POLE    |
| TFDP1 | POLE2   |
| TFDP1 | POLE4   |
| TFDP1 | POLG    |
| TFDP1 | POLR2A  |
| TFDP1 | POLR2C  |
| TFDP1 | POLR2D  |
| TFDP1 | POLR2E  |
| TFDP1 | POLR2F  |
| TFDP1 | POLR2G  |
| TFDP1 | POLR2H  |
| TFDP1 | POLR2I  |
| TFDP1 | POLR2J  |



|       |          |
|-------|----------|
| TFDP1 | P0LR2J2  |
| TFDP1 | P0LR2K   |
| TFDP1 | P0LR2M   |
| TFDP1 | P0LR3C   |
| TFDP1 | P0LRMT   |
| TFDP1 | P0MC     |
| TFDP1 | P0MP     |
| TFDP1 | P0P4     |
| TFDP1 | P0P5     |
| TFDP1 | P0P7     |
| TFDP1 | P0T1     |
| TFDP1 | P0U2AF1  |
| TFDP1 | P0U2F1   |
| TFDP1 | PPCDC    |
| TFDP1 | PPDPF    |
| TFDP1 | PPHLN1   |
| TFDP1 | PPIA     |
| TFDP1 | PPID     |
| TFDP1 | PPIE     |
| TFDP1 | PPIF     |
| TFDP1 | PPIG     |
| TFDP1 | PPIH     |
| TFDP1 | PPIL2    |
| TFDP1 | PPIL3    |
| TFDP1 | PPIL4    |
| TFDP1 | PPIP5K2  |
| TFDP1 | PPM1A    |
| TFDP1 | PPM1B    |
| TFDP1 | PPM1D    |
| TFDP1 | PPM1G    |
| TFDP1 | PPP1CA   |
| TFDP1 | PPP1CB   |
| TFDP1 | PPP1CC   |
| TFDP1 | PPP1R10  |
| TFDP1 | PPP1R11  |
| TFDP1 | PPP1R12A |
| TFDP1 | PPP1R12C |
| TFDP1 | PPP1R13L |
| TFDP1 | PPP1R15A |
| TFDP1 | PPP1R15B |
| TFDP1 | PPP1R18  |
| TFDP1 | PPP1R2   |
| TFDP1 | PPP1R21  |
| TFDP1 | PPP1R35  |
| TFDP1 | PPP1R37  |
| TFDP1 | PPP1R3E  |
| TFDP1 | PPP1R7   |
| TFDP1 | PPP1R8   |
| TFDP1 | PPP2CA   |
| TFDP1 | PPP2R1A  |

|       |          |
|-------|----------|
| TFDP1 | PPP2R2D  |
| TFDP1 | PPP2R3C  |
| TFDP1 | PPP2R5A  |
| TFDP1 | PPP2R5C  |
| TFDP1 | PPP2R5E  |
| TFDP1 | PPP3CB   |
| TFDP1 | PPP3R1   |
| TFDP1 | PPP4C    |
| TFDP1 | PPP4R2   |
| TFDP1 | PPP4R3A  |
| TFDP1 | PPP4R3B  |
| TFDP1 | PPP5C    |
| TFDP1 | PPP6C    |
| TFDP1 | PPP6R1   |
| TFDP1 | PPP6R2   |
| TFDP1 | PPP6R3   |
| TFDP1 | PPTC7    |
| TFDP1 | PQLC1    |
| TFDP1 | PRADC1   |
| TFDP1 | PRAF2    |
| TFDP1 | PRCC     |
| TFDP1 | PRDM15   |
| TFDP1 | PRDX1    |
| TFDP1 | PRDX2    |
| TFDP1 | PRDX6    |
| TFDP1 | PRELID1  |
| TFDP1 | PRELID3B |
| TFDP1 | PRIM1    |
| TFDP1 | PRIM2    |
| TFDP1 | PRKAB1   |
| TFDP1 | PRKACB   |
| TFDP1 | PRKCA    |
| TFDP1 | PRKCD    |
| TFDP1 | PRKCE    |
| TFDP1 | PRKCZ    |
| TFDP1 | PRKD3    |
| TFDP1 | PRKRA    |
| TFDP1 | PRKRIP1  |
| TFDP1 | PRMT1    |
| TFDP1 | PRMT5    |
| TFDP1 | PRMT7    |
| TFDP1 | PRMT9    |
| TFDP1 | PRPF18   |
| TFDP1 | PRPF19   |
| TFDP1 | PRPF3    |
| TFDP1 | PRPF38B  |
| TFDP1 | PRPF40A  |
| TFDP1 | PRPF4B   |
| TFDP1 | PRPF6    |
| TFDP1 | PRPF8    |

|       |           |
|-------|-----------|
| TFDP1 | PRPS1     |
| TFDP1 | PRPS2     |
| TFDP1 | PRPSAP1   |
| TFDP1 | PRPSAP2   |
| TFDP1 | PRR13     |
| TFDP1 | PRR14     |
| TFDP1 | PRR14L    |
| TFDP1 | PRRC2A    |
| TFDP1 | PRRC2C    |
| TFDP1 | PSIP1     |
| TFDP1 | PSMA1     |
| TFDP1 | PSMA2     |
| TFDP1 | PSMA3     |
| TFDP1 | PSMA3-AS1 |
| TFDP1 | PSMA4     |
| TFDP1 | PSMA5     |
| TFDP1 | PSMA6     |
| TFDP1 | PSMB1     |
| TFDP1 | PSMB2     |
| TFDP1 | PSMB3     |
| TFDP1 | PSMB7     |
| TFDP1 | PSMB9     |
| TFDP1 | PSMC2     |
| TFDP1 | PSMC3     |
| TFDP1 | PSMC3IP   |
| TFDP1 | PSMC4     |
| TFDP1 | PSMC5     |
| TFDP1 | PSMD1     |
| TFDP1 | PSMD11    |
| TFDP1 | PSMD12    |
| TFDP1 | PSMD13    |
| TFDP1 | PSMD14    |
| TFDP1 | PSMD2     |
| TFDP1 | PSMD3     |
| TFDP1 | PSMD4     |
| TFDP1 | PSMD5     |
| TFDP1 | PSMD6     |
| TFDP1 | PSMD7     |
| TFDP1 | PSMD9     |
| TFDP1 | PSME3     |
| TFDP1 | PSMG3     |
| TFDP1 | PSPC1     |
| TFDP1 | PTAR1     |
| TFDP1 | PTBP1     |
| TFDP1 | PTBP3     |
| TFDP1 | PTDSS1    |
| TFDP1 | PTER      |
| TFDP1 | PTGES3    |
| TFDP1 | PTK2B     |
| TFDP1 | PTMA      |

|       |            |
|-------|------------|
| TFDP1 | PTP4A2     |
| TFDP1 | PTPMT1     |
| TFDP1 | PTPN20     |
| TFDP1 | PTPN23     |
| TFDP1 | PTPN7      |
| TFDP1 | PTPN9      |
| TFDP1 | PTRH2      |
| TFDP1 | PTTG1      |
| TFDP1 | PUF60      |
| TFDP1 | PUM1       |
| TFDP1 | PURA       |
| TFDP1 | PUS3       |
| TFDP1 | PUSL1      |
| TFDP1 | PWWP2A     |
| TFDP1 | PXMP2      |
| TFDP1 | PYCR2      |
| TFDP1 | PYM1       |
| TFDP1 | QARS       |
| TFDP1 | QRICH1     |
| TFDP1 | QTRT2      |
| TFDP1 | RAB10      |
| TFDP1 | RAB11B     |
| TFDP1 | RAB11B-AS1 |
| TFDP1 | RAB14      |
| TFDP1 | RAB1A      |
| TFDP1 | RAB1B      |
| TFDP1 | RAB27A     |
| TFDP1 | RAB28      |
| TFDP1 | RAB30      |
| TFDP1 | RAB33A     |
| TFDP1 | RAB34      |
| TFDP1 | RAB35      |
| TFDP1 | RAB3A      |
| TFDP1 | RAB3IP     |
| TFDP1 | RAB4A      |
| TFDP1 | RAB5C      |
| TFDP1 | RAB6A      |
| TFDP1 | RAB8A      |
| TFDP1 | RAB8B      |
| TFDP1 | RABEP1     |
| TFDP1 | RABEP2     |
| TFDP1 | RABGAP1    |
| TFDP1 | RABGEF1    |
| TFDP1 | RABIF      |
| TFDP1 | RABL6      |
| TFDP1 | RAC1       |
| TFDP1 | RACK1      |
| TFDP1 | RAD18      |
| TFDP1 | RAD21      |
| TFDP1 | RAD23A     |

|       |          |
|-------|----------|
| TFDP1 | RAD23B   |
| TFDP1 | RAD51AP1 |
| TFDP1 | RAD51C   |
| TFDP1 | RAD52    |
| TFDP1 | RAD54L   |
| TFDP1 | RAD9A    |
| TFDP1 | RAE1     |
| TFDP1 | RAI1     |
| TFDP1 | RALA     |
| TFDP1 | RALBP1   |
| TFDP1 | RALGAPA2 |
| TFDP1 | RALY     |
| TFDP1 | RAN      |
| TFDP1 | RANBP1   |
| TFDP1 | RANBP3   |
| TFDP1 | RANBP9   |
| TFDP1 | RANGRF   |
| TFDP1 | RAP1B    |
| TFDP1 | RAP2B    |
| TFDP1 | RAP2C    |
| TFDP1 | RAPGEF5  |
| TFDP1 | RARS     |
| TFDP1 | RARS2    |
| TFDP1 | RASA2    |
| TFDP1 | RASGRP2  |
| TFDP1 | RASSF1   |
| TFDP1 | RASSF2   |
| TFDP1 | RASSF3   |
| TFDP1 | RASSF7   |
| TFDP1 | RB1      |
| TFDP1 | RBBP4    |
| TFDP1 | RBBP7    |
| TFDP1 | RBBP8    |
| TFDP1 | RBL1     |
| TFDP1 | RBM12B   |
| TFDP1 | RBM14    |
| TFDP1 | RBM15    |
| TFDP1 | RBM17    |
| TFDP1 | RBM22    |
| TFDP1 | RBM23    |
| TFDP1 | RBM25    |
| TFDP1 | RBM26    |
| TFDP1 | RBM27    |
| TFDP1 | RBM28    |
| TFDP1 | RBM3     |
| TFDP1 | RBM38    |
| TFDP1 | RBM39    |
| TFDP1 | RBM4     |
| TFDP1 | RBM41    |
| TFDP1 | RBM5     |

|       |        |
|-------|--------|
| TFDP1 | RBM6   |
| TFDP1 | RBM8A  |
| TFDP1 | RBMX   |
| TFDP1 | RBMX2  |
| TFDP1 | RBSN   |
| TFDP1 | RBX1   |
| TFDP1 | RC3H2  |
| TFDP1 | RCAN3  |
| TFDP1 | RCC1   |
| TFDP1 | RCC2   |
| TFDP1 | RCCD1  |
| TFDP1 | RCHY1  |
| TFDP1 | RCOR1  |
| TFDP1 | RCSD1  |
| TFDP1 | RECQL  |
| TFDP1 | RECQL4 |
| TFDP1 | REEP4  |
| TFDP1 | REEP5  |
| TFDP1 | REL    |
| TFDP1 | RELA   |
| TFDP1 | RELB   |
| TFDP1 | RELT   |
| TFDP1 | REST   |
| TFDP1 | REV1   |
| TFDP1 | RFC1   |
| TFDP1 | RFC2   |
| TFDP1 | RFC3   |
| TFDP1 | RFC4   |
| TFDP1 | RFC5   |
| TFDP1 | RFESD  |
| TFDP1 | RFK    |
| TFDP1 | RFT1   |
| TFDP1 | RFWD3  |
| TFDP1 | RFX5   |
| TFDP1 | RGCC   |
| TFDP1 | RGP1   |
| TFDP1 | RGS19  |
| TFDP1 | RGS20  |
| TFDP1 | RHBDD2 |
| TFDP1 | RHBDF2 |
| TFDP1 | RHEB   |
| TFDP1 | RHN01  |
| TFDP1 | RHOG   |
| TFDP1 | RIC1   |
| TFDP1 | RIF1   |
| TFDP1 | RIOK1  |
| TFDP1 | RIPK2  |
| TFDP1 | RMDN1  |
| TFDP1 | RMI1   |
| TFDP1 | RMI2   |

|       |          |
|-------|----------|
| TFDP1 | RMND5A   |
| TFDP1 | RMND5B   |
| TFDP1 | RNASEH1  |
| TFDP1 | RNASEH2A |
| TFDP1 | RNASEH2B |
| TFDP1 | RNF10    |
| TFDP1 | RNF115   |
| TFDP1 | RNF121   |
| TFDP1 | RNF123   |
| TFDP1 | RNF126   |
| TFDP1 | RNF138   |
| TFDP1 | RNF139   |
| TFDP1 | RNF144B  |
| TFDP1 | RNF146   |
| TFDP1 | RNF167   |
| TFDP1 | RNF168   |
| TFDP1 | RNF181   |
| TFDP1 | RNF187   |
| TFDP1 | RNF20    |
| TFDP1 | RNF212   |
| TFDP1 | RNF219   |
| TFDP1 | RNF220   |
| TFDP1 | RNF26    |
| TFDP1 | RNF34    |
| TFDP1 | RNF38    |
| TFDP1 | RNF4     |
| TFDP1 | RNF5     |
| TFDP1 | RNF6     |
| TFDP1 | RNF8     |
| TFDP1 | RNFT1    |
| TFDP1 | RNGTT    |
| TFDP1 | RNPC3    |
| TFDP1 | RNPEP    |
| TFDP1 | RNPS1    |
| TFDP1 | ROCK2    |
| TFDP1 | RP2      |
| TFDP1 | RPA1     |
| TFDP1 | RPA2     |
| TFDP1 | RPA3     |
| TFDP1 | RPAIN    |
| TFDP1 | RPAP2    |
| TFDP1 | RPIA     |
| TFDP1 | RPL10    |
| TFDP1 | RPL10A   |
| TFDP1 | RPL11    |
| TFDP1 | RPL12    |
| TFDP1 | RPL13A   |
| TFDP1 | RPL14    |
| TFDP1 | RPL15    |
| TFDP1 | RPL17    |

|       |          |
|-------|----------|
| TFDP1 | RPL18A   |
| TFDP1 | RPL19    |
| TFDP1 | RPL21    |
| TFDP1 | RPL22    |
| TFDP1 | RPL22L1  |
| TFDP1 | RPL23    |
| TFDP1 | RPL23A   |
| TFDP1 | RPL26    |
| TFDP1 | RPL26L1  |
| TFDP1 | RPL27    |
| TFDP1 | RPL27A   |
| TFDP1 | RPL29    |
| TFDP1 | RPL3     |
| TFDP1 | RPL30    |
| TFDP1 | RPL31    |
| TFDP1 | RPL32    |
| TFDP1 | RPL34    |
| TFDP1 | RPL35A   |
| TFDP1 | RPL36    |
| TFDP1 | RPL36A   |
| TFDP1 | RPL37    |
| TFDP1 | RPL38    |
| TFDP1 | RPL39    |
| TFDP1 | RPL4     |
| TFDP1 | RPL41    |
| TFDP1 | RPL5     |
| TFDP1 | RPL6     |
| TFDP1 | RPL7     |
| TFDP1 | RPL7L1   |
| TFDP1 | RPLP1    |
| TFDP1 | RPLP2    |
| TFDP1 | RPP30    |
| TFDP1 | RPRD1B   |
| TFDP1 | RPS10    |
| TFDP1 | RPS11    |
| TFDP1 | RPS12    |
| TFDP1 | RPS13    |
| TFDP1 | RPS14    |
| TFDP1 | RPS15    |
| TFDP1 | RPS15A   |
| TFDP1 | RPS16    |
| TFDP1 | RPS17    |
| TFDP1 | RPS19    |
| TFDP1 | RPS19BP1 |
| TFDP1 | RPS2     |
| TFDP1 | RPS20    |
| TFDP1 | RPS21    |
| TFDP1 | RPS23    |
| TFDP1 | RPS24    |
| TFDP1 | RPS26    |



|       |         |
|-------|---------|
| TFDP1 | RPS27   |
| TFDP1 | RPS27A  |
| TFDP1 | RPS27L  |
| TFDP1 | RPS29   |
| TFDP1 | RPS3    |
| TFDP1 | RPS3A   |
| TFDP1 | RPS4X   |
| TFDP1 | RPS6    |
| TFDP1 | RPS6KB2 |
| TFDP1 | RPS7    |
| TFDP1 | RPS8    |
| TFDP1 | RPSA    |
| TFDP1 | RPUSD1  |
| TFDP1 | RRAGA   |
| TFDP1 | RRAS2   |
| TFDP1 | RRM1    |
| TFDP1 | RRM2    |
| TFDP1 | RRN3    |
| TFDP1 | RRP7A   |
| TFDP1 | RSBN1   |
| TFDP1 | RSBN1L  |
| TFDP1 | RSF1    |
| TFDP1 | RSL24D1 |
| TFDP1 | RSRC1   |
| TFDP1 | RSRC2   |
| TFDP1 | RSU1    |
| TFDP1 | RTCA    |
| TFDP1 | RTCB    |
| TFDP1 | RTF1    |
| TFDP1 | RTN3    |
| TFDP1 | RTN4    |
| TFDP1 | RUBCN   |
| TFDP1 | RUFY1   |
| TFDP1 | RUFY3   |
| TFDP1 | RUNX3   |
| TFDP1 | RUSC1   |
| TFDP1 | RUVBL1  |
| TFDP1 | RYBP    |
| TFDP1 | S100A10 |
| TFDP1 | S100PBP |
| TFDP1 | S1PR1   |
| TFDP1 | S1PR2   |
| TFDP1 | SAAL1   |
| TFDP1 | SAC3D1  |
| TFDP1 | SAE1    |
| TFDP1 | SAFB2   |
| TFDP1 | SAMD1   |
| TFDP1 | SAMM50  |
| TFDP1 | SAP130  |
| TFDP1 | SAP30   |

|       |          |
|-------|----------|
| TFDP1 | SAR1A    |
| TFDP1 | SARNP    |
| TFDP1 | SARS     |
| TFDP1 | SARS2    |
| TFDP1 | SART1    |
| TFDP1 | SART3    |
| TFDP1 | SASS6    |
| TFDP1 | SBDS     |
| TFDP1 | SBN01    |
| TFDP1 | SC5D     |
| TFDP1 | SCAF1    |
| TFDP1 | SCAF11   |
| TFDP1 | SCAF4    |
| TFDP1 | SCAMP1   |
| TFDP1 | SCAND1   |
| TFDP1 | SCARB1   |
| TFDP1 | SCCPDH   |
| TFDP1 | SCLT1    |
| TFDP1 | SCLY     |
| TFDP1 | SCMH1    |
| TFDP1 | SCNM1    |
| TFDP1 | SCOC     |
| TFDP1 | SCRN1    |
| TFDP1 | SDCCAG8  |
| TFDP1 | SDHAF1   |
| TFDP1 | SDHB     |
| TFDP1 | SDHC     |
| TFDP1 | SDR39U1  |
| TFDP1 | SDR42E1  |
| TFDP1 | SEC11A   |
| TFDP1 | SEC14L1  |
| TFDP1 | SEC22A   |
| TFDP1 | SEC22B   |
| TFDP1 | SEC22C   |
| TFDP1 | SEC23IP  |
| TFDP1 | SEC62    |
| TFDP1 | SECISBP2 |
| TFDP1 | SEL1L3   |
| TFDP1 | SENP8    |
| TFDP1 | SEPHS1   |
| TFDP1 | SEPHS2   |
| TFDP1 | SEPT11   |
| TFDP1 | SEPT7    |
| TFDP1 | SEPT8    |
| TFDP1 | SEPT9    |
| TFDP1 | SERBP1   |
| TFDP1 | SERF2    |
| TFDP1 | SERINC2  |
| TFDP1 | SERINC3  |
| TFDP1 | SERP2    |

|       |         |
|-------|---------|
| TFDP1 | SERTAD2 |
| TFDP1 | SESTD1  |
| TFDP1 | SET     |
| TFDP1 | SETD3   |
| TFDP1 | SETD4   |
| TFDP1 | SETD5   |
| TFDP1 | SETD7   |
| TFDP1 | SETDB2  |
| TFDP1 | SF1     |
| TFDP1 | SF3A1   |
| TFDP1 | SF3A2   |
| TFDP1 | SF3A3   |
| TFDP1 | SF3B1   |
| TFDP1 | SF3B2   |
| TFDP1 | SF3B3   |
| TFDP1 | SF3B5   |
| TFDP1 | SFI1    |
| TFDP1 | SFMBT1  |
| TFDP1 | SFR1    |
| TFDP1 | SFSWAP  |
| TFDP1 | SFT2D1  |
| TFDP1 | SFXN1   |
| TFDP1 | SFXN4   |
| TFDP1 | SFXN5   |
| TFDP1 | SGCE    |
| TFDP1 | SG01    |
| TFDP1 | SGTA    |
| TFDP1 | SH2B1   |
| TFDP1 | SH2B2   |
| TFDP1 | SH2B3   |
| TFDP1 | SH3BP1  |
| TFDP1 | SH3GL1  |
| TFDP1 | SH3GLB1 |
| TFDP1 | SH3GLB2 |
| TFDP1 | SH3KBP1 |
| TFDP1 | SHC1    |
| TFDP1 | SHCBP1  |
| TFDP1 | SHISA5  |
| TFDP1 | SHMT1   |
| TFDP1 | SHMT2   |
| TFDP1 | SHQ1    |
| TFDP1 | SIAH1   |
| TFDP1 | SIN3A   |
| TFDP1 | SIPA1   |
| TFDP1 | SIRT1   |
| TFDP1 | SIRT6   |
| TFDP1 | SIVA1   |
| TFDP1 | SKA2    |
| TFDP1 | SKAP2   |
| TFDP1 | SKP2    |

|       |          |
|-------|----------|
| TFDP1 | SLAIN2   |
| TFDP1 | SLBP     |
| TFDP1 | SLC11A2  |
| TFDP1 | SLC12A5  |
| TFDP1 | SLC15A4  |
| TFDP1 | SLC16A1  |
| TFDP1 | SLC1A4   |
| TFDP1 | SLC1A5   |
| TFDP1 | SLC20A1  |
| TFDP1 | SLC25A1  |
| TFDP1 | SLC25A10 |
| TFDP1 | SLC25A11 |
| TFDP1 | SLC25A12 |
| TFDP1 | SLC25A14 |
| TFDP1 | SLC25A17 |
| TFDP1 | SLC25A19 |
| TFDP1 | SLC25A29 |
| TFDP1 | SLC25A3  |
| TFDP1 | SLC25A33 |
| TFDP1 | SLC25A36 |
| TFDP1 | SLC25A37 |
| TFDP1 | SLC25A39 |
| TFDP1 | SLC25A4  |
| TFDP1 | SLC25A40 |
| TFDP1 | SLC25A5  |
| TFDP1 | SLC26A6  |
| TFDP1 | SLC27A3  |
| TFDP1 | SLC31A1  |
| TFDP1 | SLC35A1  |
| TFDP1 | SLC35A4  |
| TFDP1 | SLC35B2  |
| TFDP1 | SLC35B4  |
| TFDP1 | SLC35E1  |
| TFDP1 | SLC35F5  |
| TFDP1 | SLC35G1  |
| TFDP1 | SLC37A4  |
| TFDP1 | SLC39A3  |
| TFDP1 | SLC39A8  |
| TFDP1 | SLC41A1  |
| TFDP1 | SLC41A3  |
| TFDP1 | SLC43A1  |
| TFDP1 | SLC43A2  |
| TFDP1 | SLC9A3   |
| TFDP1 | SLC9A3R1 |
| TFDP1 | SLF1     |
| TFDP1 | SLF2     |
| TFDP1 | SLFN11   |
| TFDP1 | SLFN13   |
| TFDP1 | SLK      |
| TFDP1 | SLMAP    |

|       |          |
|-------|----------|
| TFDP1 | SLTM     |
| TFDP1 | SLU7     |
| TFDP1 | SLX4     |
| TFDP1 | SLX4IP   |
| TFDP1 | SMAD2    |
| TFDP1 | SMAGP    |
| TFDP1 | SMAP1    |
| TFDP1 | SMARCA2  |
| TFDP1 | SMARCA4  |
| TFDP1 | SMARCA5  |
| TFDP1 | SMARCA1  |
| TFDP1 | SMARCAL1 |
| TFDP1 | SMARCB1  |
| TFDP1 | SMARCC1  |
| TFDP1 | SMARCD2  |
| TFDP1 | SMARCE1  |
| TFDP1 | SMC1A    |
| TFDP1 | SMC2     |
| TFDP1 | SMC3     |
| TFDP1 | SMC4     |
| TFDP1 | SMC5     |
| TFDP1 | SMCHD1   |
| TFDP1 | SMC04    |
| TFDP1 | SMCR5    |
| TFDP1 | SMG1     |
| TFDP1 | SMG5     |
| TFDP1 | SMG7     |
| TFDP1 | SMG9     |
| TFDP1 | SMIM12   |
| TFDP1 | SMIM13   |
| TFDP1 | SMIM15   |
| TFDP1 | SMIM19   |
| TFDP1 | SMIM4    |
| TFDP1 | SMPD4    |
| TFDP1 | SMS      |
| TFDP1 | SMUG1    |
| TFDP1 | SMYD2    |
| TFDP1 | SMYD4    |
| TFDP1 | SNAP29   |
| TFDP1 | SNAPC1   |
| TFDP1 | SNAPC3   |
| TFDP1 | SNAPIN   |
| TFDP1 | SNF8     |
| TFDP1 | SNHG10   |
| TFDP1 | SNHG19   |
| TFDP1 | SNHG21   |
| TFDP1 | SNHG25   |
| TFDP1 | SNHG7    |
| TFDP1 | SNIP1    |
| TFDP1 | SNRNP200 |

|       |         |
|-------|---------|
| TFDP1 | SNRNP27 |
| TFDP1 | SNRNP35 |
| TFDP1 | SNRNP40 |
| TFDP1 | SNRNP48 |
| TFDP1 | SNRNP70 |
| TFDP1 | SNRPA   |
| TFDP1 | SNRPA1  |
| TFDP1 | SNRPB   |
| TFDP1 | SNRPD1  |
| TFDP1 | SNRPD2  |
| TFDP1 | SNRPE   |
| TFDP1 | SNRPF   |
| TFDP1 | SNRPG   |
| TFDP1 | SNRPN   |
| TFDP1 | SNTA1   |
| TFDP1 | SNTB2   |
| TFDP1 | SNU13   |
| TFDP1 | SNUPN   |
| TFDP1 | SNW1    |
| TFDP1 | SNX12   |
| TFDP1 | SNX14   |
| TFDP1 | SNX22   |
| TFDP1 | SNX3    |
| TFDP1 | SNX5    |
| TFDP1 | SOD1    |
| TFDP1 | SORL1   |
| TFDP1 | SOX4    |
| TFDP1 | SP1     |
| TFDP1 | SP2     |
| TFDP1 | SP4     |
| TFDP1 | SPAG1   |
| TFDP1 | SPAG16  |
| TFDP1 | SPAG7   |
| TFDP1 | SPAG9   |
| TFDP1 | SPATA33 |
| TFDP1 | SPATS2  |
| TFDP1 | SPC24   |
| TFDP1 | SPC25   |
| TFDP1 | SPDL1   |
| TFDP1 | SPG21   |
| TFDP1 | SPG7    |
| TFDP1 | SPHK2   |
| TFDP1 | SPIN4   |
| TFDP1 | SPOP    |
| TFDP1 | SPOPL   |
| TFDP1 | SPPL2A  |
| TFDP1 | SPSB2   |
| TFDP1 | SPSB3   |
| TFDP1 | SPTAN1  |
| TFDP1 | SPTLC2  |

|       |          |
|-------|----------|
| TFDP1 | SPTSSA   |
| TFDP1 | SPTY2D1  |
| TFDP1 | SQLE     |
| TFDP1 | SRBD1    |
| TFDP1 | SREBF2   |
| TFDP1 | SREK1IP1 |
| TFDP1 | SRGAP2B  |
| TFDP1 | SRP14    |
| TFDP1 | SRP19    |
| TFDP1 | SRP54    |
| TFDP1 | SRP9     |
| TFDP1 | SRPK1    |
| TFDP1 | SRRM1    |
| TFDP1 | SRRT     |
| TFDP1 | SRSF1    |
| TFDP1 | SRSF10   |
| TFDP1 | SRSF2    |
| TFDP1 | SRSF3    |
| TFDP1 | SRSF4    |
| TFDP1 | SRSF5    |
| TFDP1 | SRSF6    |
| TFDP1 | SRSF7    |
| TFDP1 | SS18     |
| TFDP1 | SSB      |
| TFDP1 | SSBP1    |
| TFDP1 | SSBP2    |
| TFDP1 | SSH2     |
| TFDP1 | SSNA1    |
| TFDP1 | SSR2     |
| TFDP1 | SSRP1    |
| TFDP1 | ST20     |
| TFDP1 | ST3GAL4  |
| TFDP1 | ST7L     |
| TFDP1 | STAG1    |
| TFDP1 | STAG2    |
| TFDP1 | STAG3    |
| TFDP1 | STAM     |
| TFDP1 | STAM2    |
| TFDP1 | STAP1    |
| TFDP1 | STARD3NL |
| TFDP1 | STARD7   |
| TFDP1 | STAT3    |
| TFDP1 | STAT6    |
| TFDP1 | STAU1    |
| TFDP1 | STAU2    |
| TFDP1 | STIM2    |
| TFDP1 | STK19    |
| TFDP1 | STK24    |
| TFDP1 | STK25    |
| TFDP1 | STK32C   |

|       |         |
|-------|---------|
| TFDP1 | STK38L  |
| TFDP1 | STK39   |
| TFDP1 | STK4    |
| TFDP1 | STK40   |
| TFDP1 | STMN1   |
| TFDP1 | STOML2  |
| TFDP1 | STPG1   |
| TFDP1 | STRADA  |
| TFDP1 | STRAP   |
| TFDP1 | STRN3   |
| TFDP1 | STX11   |
| TFDP1 | STX16   |
| TFDP1 | STX18   |
| TFDP1 | STX5    |
| TFDP1 | STXBP3  |
| TFDP1 | SUCLA2  |
| TFDP1 | SUCLG1  |
| TFDP1 | SUC0    |
| TFDP1 | SUGP1   |
| TFDP1 | SUGP2   |
| TFDP1 | SUGT1   |
| TFDP1 | SULF2   |
| TFDP1 | SUM01   |
| TFDP1 | SUM02   |
| TFDP1 | SUM03   |
| TFDP1 | SUPT16H |
| TFDP1 | SUPT4H1 |
| TFDP1 | SUPT5H  |
| TFDP1 | SUSD3   |
| TFDP1 | SUV39H1 |
| TFDP1 | SUV39H2 |
| TFDP1 | SUZ12   |
| TFDP1 | SVBP    |
| TFDP1 | SWI5    |
| TFDP1 | SYAP1   |
| TFDP1 | SYBU    |
| TFDP1 | SYCE1L  |
| TFDP1 | SYF2    |
| TFDP1 | SYK     |
| TFDP1 | SYNC    |
| TFDP1 | SYNCRIP |
| TFDP1 | SYNE2   |
| TFDP1 | SYVN1   |
| TFDP1 | TAB2    |
| TFDP1 | TACC1   |
| TFDP1 | TACC3   |
| TFDP1 | TAC01   |
| TFDP1 | TADA1   |
| TFDP1 | TADA2A  |
| TFDP1 | TADA3   |



|       |          |
|-------|----------|
| TFDP1 | TAF10    |
| TFDP1 | TAF11    |
| TFDP1 | TAF12    |
| TFDP1 | TAF15    |
| TFDP1 | TAF1B    |
| TFDP1 | TAF3     |
| TFDP1 | TAF4B    |
| TFDP1 | TAF5     |
| TFDP1 | TAF6     |
| TFDP1 | TAF7     |
| TFDP1 | TAF9B    |
| TFDP1 | TALD01   |
| TFDP1 | TANK     |
| TFDP1 | TAP1     |
| TFDP1 | TARDBP   |
| TFDP1 | TATDN2   |
| TFDP1 | TAX1BP3  |
| TFDP1 | TBC1D1   |
| TFDP1 | TBC1D10B |
| TFDP1 | TBC1D13  |
| TFDP1 | TBC1D14  |
| TFDP1 | TBC1D15  |
| TFDP1 | TBC1D22A |
| TFDP1 | TBC1D24  |
| TFDP1 | TBC1D31  |
| TFDP1 | TBC1D7   |
| TFDP1 | TBCA     |
| TFDP1 | TBCC     |
| TFDP1 | TBK1     |
| TFDP1 | TBPL1    |
| TFDP1 | TBRG4    |
| TFDP1 | TCAIM    |
| TFDP1 | TCEA1    |
| TFDP1 | TCEAL9   |
| TFDP1 | TCEANC2  |
| TFDP1 | TCERG1   |
| TFDP1 | TCF12    |
| TFDP1 | TCF19    |
| TFDP1 | TCF25    |
| TFDP1 | TCF3     |
| TFDP1 | TCF4     |
| TFDP1 | TCHP     |
| TFDP1 | TCOF1    |
| TFDP1 | TCP1     |
| TFDP1 | TCTE3    |
| TFDP1 | TCTEX1D2 |
| TFDP1 | TDG      |
| TFDP1 | TDP1     |
| TFDP1 | TDP2     |
| TFDP1 | TDRD7    |

|       |             |
|-------|-------------|
| TFDP1 | TDRKH       |
| TFDP1 | TEC         |
| TFDP1 | TECR        |
| TFDP1 | TEL02       |
| TFDP1 | TERF1       |
| TFDP1 | TEX10       |
| TFDP1 | TEX264      |
| TFDP1 | TEX30       |
| TFDP1 | TEX9        |
| TFDP1 | TFB1M       |
| TFDP1 | TFDP1       |
| TFDP1 | TFDP2       |
| TFDP1 | TFEB        |
| TFDP1 | TFIP11      |
| TFDP1 | TFPT        |
| TFDP1 | TGFB1       |
| TFDP1 | TGFBR1      |
| TFDP1 | TGOLN2      |
| TFDP1 | THAP1       |
| TFDP1 | THAP11      |
| TFDP1 | THAP2       |
| TFDP1 | THAP4       |
| TFDP1 | THAP9-AS1   |
| TFDP1 | THG1L       |
| TFDP1 | THOC1       |
| TFDP1 | THOC2       |
| TFDP1 | THOC3       |
| TFDP1 | THOC5       |
| TFDP1 | THOC6       |
| TFDP1 | THOC7       |
| TFDP1 | THOP1       |
| TFDP1 | THRAP3      |
| TFDP1 | THUMPD3-AS1 |
| TFDP1 | TIA1        |
| TFDP1 | TIAL1       |
| TFDP1 | TIAM1       |
| TFDP1 | TIFA        |
| TFDP1 | TIGAR       |
| TFDP1 | TIMELESS    |
| TFDP1 | TIMM10      |
| TFDP1 | TIMM17A     |
| TFDP1 | TIMM21      |
| TFDP1 | TIMM23      |
| TFDP1 | TIMM9       |
| TFDP1 | TINF2       |
| TFDP1 | TIPARP      |
| TFDP1 | TIPIN       |
| TFDP1 | TIPRL       |
| TFDP1 | TK1         |
| TFDP1 | TKFC        |

|       |          |
|-------|----------|
| TFDP1 | TKT      |
| TFDP1 | TLCD1    |
| TFDP1 | TLE4     |
| TFDP1 | TLK1     |
| TFDP1 | TLK2     |
| TFDP1 | TM2D3    |
| TFDP1 | TM7SF3   |
| TFDP1 | TM9SF3   |
| TFDP1 | TMBIM6   |
| TFDP1 | TMC01    |
| TFDP1 | TMED1    |
| TFDP1 | TMED8    |
| TFDP1 | TMEM102  |
| TFDP1 | TMEM106C |
| TFDP1 | TMEM107  |
| TFDP1 | TMEM11   |
| TFDP1 | TMEM126B |
| TFDP1 | TMEM143  |
| TFDP1 | TMEM14A  |
| TFDP1 | TMEM14B  |
| TFDP1 | TMEM160  |
| TFDP1 | TMEM161B |
| TFDP1 | TMEM165  |
| TFDP1 | TMEM167A |
| TFDP1 | TMEM18   |
| TFDP1 | TMEM183A |
| TFDP1 | TMEM199  |
| TFDP1 | TMEM201  |
| TFDP1 | TMEM206  |
| TFDP1 | TMEM209  |
| TFDP1 | TMEM218  |
| TFDP1 | TMEM219  |
| TFDP1 | TMEM222  |
| TFDP1 | TMEM230  |
| TFDP1 | TMEM237  |
| TFDP1 | TMEM243  |
| TFDP1 | TMEM245  |
| TFDP1 | TMEM251  |
| TFDP1 | TMEM256  |
| TFDP1 | TMEM263  |
| TFDP1 | TMEM39B  |
| TFDP1 | TMEM41B  |
| TFDP1 | TMEM60   |
| TFDP1 | TMEM64   |
| TFDP1 | TMEM68   |
| TFDP1 | TMEM80   |
| TFDP1 | TMEM91   |
| TFDP1 | TMEM97   |
| TFDP1 | TMLHE    |
| TFDP1 | TMP0     |

|       |              |
|-------|--------------|
| TFDP1 | TMSB10       |
| TFDP1 | TMSB4X       |
| TFDP1 | TMSB4Y       |
| TFDP1 | TMTC4        |
| TFDP1 | TMUB1        |
| TFDP1 | TMUB2        |
| TFDP1 | TMX1         |
| TFDP1 | TMX4         |
| TFDP1 | TNFAIP8      |
| TFDP1 | TNIP1        |
| TFDP1 | TNK2         |
| TFDP1 | TNKS2        |
| TFDP1 | TNKS2-AS1    |
| TFDP1 | TNP01        |
| TFDP1 | TNP03        |
| TFDP1 | TOB1         |
| TFDP1 | TOB2         |
| TFDP1 | TOE1         |
| TFDP1 | TOMM22       |
| TFDP1 | TOMM5        |
| TFDP1 | TOMM7        |
| TFDP1 | TOP1         |
| TFDP1 | TOP2B        |
| TFDP1 | TOPBP1       |
| TFDP1 | TOPORS       |
| TFDP1 | TOR1AIP1     |
| TFDP1 | TOR1AIP2     |
| TFDP1 | TOR2A        |
| TFDP1 | TP53         |
| TFDP1 | TP53BP1      |
| TFDP1 | TP53I13      |
| TFDP1 | TP53INP2     |
| TFDP1 | TP53TG1      |
| TFDP1 | TPCN1        |
| TFDP1 | TPGS2        |
| TFDP1 | TPI1         |
| TFDP1 | TPK1         |
| TFDP1 | TPM1         |
| TFDP1 | TPM3         |
| TFDP1 | TPM4         |
| TFDP1 | TPMT         |
| TFDP1 | TPP2         |
| TFDP1 | TPR          |
| TFDP1 | TPRA1        |
| TFDP1 | TRA2A        |
| TFDP1 | TRA2B        |
| TFDP1 | TRABD        |
| TFDP1 | TRAF2        |
| TFDP1 | TRAF3IP1     |
| TFDP1 | TRAF3IP2-AS1 |

|       |          |
|-------|----------|
| TFDP1 | TRAF4    |
| TFDP1 | TRAF7    |
| TFDP1 | TRAIP    |
| TFDP1 | TRAPPC10 |
| TFDP1 | TRAPPC12 |
| TFDP1 | TRAPPC2  |
| TFDP1 | TRAPPC2B |
| TFDP1 | TRAPPC3  |
| TFDP1 | TRAPPC6B |
| TFDP1 | TRAPPC8  |
| TFDP1 | TRIM14   |
| TFDP1 | TRIM26   |
| TFDP1 | TRIM28   |
| TFDP1 | TRIM37   |
| TFDP1 | TRIM59   |
| TFDP1 | TRIOBP   |
| TFDP1 | TRIP11   |
| TFDP1 | TRIP13   |
| TFDP1 | TRIP4    |
| TFDP1 | TRMT11   |
| TFDP1 | TRMT12   |
| TFDP1 | TRMT2A   |
| TFDP1 | TRNAU1AP |
| TFDP1 | TRNT1    |
| TFDP1 | TROVE2   |
| TFDP1 | TRPC4AP  |
| TFDP1 | TRUB1    |
| TFDP1 | TSC22D4  |
| TFDP1 | TSEN34   |
| TFDP1 | TSEN54   |
| TFDP1 | TSFM     |
| TFDP1 | TSG101   |
| TFDP1 | TSN      |
| TFDP1 | TSNAX    |
| TFDP1 | TSP0     |
| TFDP1 | TSTD1    |
| TFDP1 | TSTD2    |
| TFDP1 | TTC13    |
| TFDP1 | TTC14    |
| TFDP1 | TTC21B   |
| TFDP1 | TTC27    |
| TFDP1 | TTC30A   |
| TFDP1 | TTC5     |
| TFDP1 | TTC7A    |
| TFDP1 | TTC9C    |
| TFDP1 | TTF2     |
| TFDP1 | TTI2     |
| TFDP1 | TTL      |
| TFDP1 | TTLL4    |
| TFDP1 | TUBA1B   |

|       |           |
|-------|-----------|
| TFDP1 | TUBA4A    |
| TFDP1 | TUBB      |
| TFDP1 | TUBB2A    |
| TFDP1 | TUBB6     |
| TFDP1 | TUBG1     |
| TFDP1 | TUBGCP3   |
| TFDP1 | TUBGCP4   |
| TFDP1 | TUBGCP5   |
| TFDP1 | TUFM      |
| TFDP1 | TUSC2     |
| TFDP1 | TWF1      |
| TFDP1 | TWF2      |
| TFDP1 | TWISTNB   |
| TFDP1 | TXLNG     |
| TFDP1 | TXN2      |
| TFDP1 | TXNDC12   |
| TFDP1 | TXNDC16   |
| TFDP1 | TXNDC17   |
| TFDP1 | TXNDC9    |
| TFDP1 | TXNL1     |
| TFDP1 | TYMS      |
| TFDP1 | U2AF1L5   |
| TFDP1 | U2AF2     |
| TFDP1 | U2SURP    |
| TFDP1 | UBA1      |
| TFDP1 | UBA2      |
| TFDP1 | UBA3      |
| TFDP1 | UBA52     |
| TFDP1 | UBA6      |
| TFDP1 | UBAC1     |
| TFDP1 | UBAC2-AS1 |
| TFDP1 | UBAP1     |
| TFDP1 | UBAP2     |
| TFDP1 | UBAP2L    |
| TFDP1 | UBB       |
| TFDP1 | UBC       |
| TFDP1 | UBE2A     |
| TFDP1 | UBE2D2    |
| TFDP1 | UBE2D3    |
| TFDP1 | UBE2E1    |
| TFDP1 | UBE2E3    |
| TFDP1 | UBE2G1    |
| TFDP1 | UBE2I     |
| TFDP1 | UBE2J1    |
| TFDP1 | UBE2L3    |
| TFDP1 | UBE2L6    |
| TFDP1 | UBE2M     |
| TFDP1 | UBE2N     |
| TFDP1 | UBE2O     |
| TFDP1 | UBE2Q1    |

|       |          |
|-------|----------|
| TFDP1 | UBE2R2   |
| TFDP1 | UBE2T    |
| TFDP1 | UBE3A    |
| TFDP1 | UBE3C    |
| TFDP1 | UBE4A    |
| TFDP1 | UBE4B    |
| TFDP1 | UBL4A    |
| TFDP1 | UBL5     |
| TFDP1 | UBL7     |
| TFDP1 | UBL7-AS1 |
| TFDP1 | UBLCP1   |
| TFDP1 | UBN1     |
| TFDP1 | UBP1     |
| TFDP1 | UBQLN1   |
| TFDP1 | UBQLN2   |
| TFDP1 | UBR4     |
| TFDP1 | UBR5     |
| TFDP1 | UBR7     |
| TFDP1 | UBTF     |
| TFDP1 | UBXN11   |
| TFDP1 | UBXN2A   |
| TFDP1 | UBXN2B   |
| TFDP1 | UBXN4    |
| TFDP1 | UCHL1    |
| TFDP1 | UCHL3    |
| TFDP1 | UCHL5    |
| TFDP1 | UCK1     |
| TFDP1 | UCP2     |
| TFDP1 | UGGT1    |
| TFDP1 | UGP2     |
| TFDP1 | UHRF1    |
| TFDP1 | UHRF2    |
| TFDP1 | ULK4     |
| TFDP1 | UMAD1    |
| TFDP1 | UMPS     |
| TFDP1 | UNG      |
| TFDP1 | UNK      |
| TFDP1 | UPF1     |
| TFDP1 | UPF2     |
| TFDP1 | UPF3B    |
| TFDP1 | UQCC1    |
| TFDP1 | UQCC2    |
| TFDP1 | UQCC3    |
| TFDP1 | UQCR10   |
| TFDP1 | UQCRC1   |
| TFDP1 | UQCRH    |
| TFDP1 | URGCP    |
| TFDP1 | URI1     |
| TFDP1 | URM1     |
| TFDP1 | UROD     |

|       |        |
|-------|--------|
| TFDP1 | USP1   |
| TFDP1 | USP13  |
| TFDP1 | USP14  |
| TFDP1 | USP22  |
| TFDP1 | USP24  |
| TFDP1 | USP39  |
| TFDP1 | USP4   |
| TFDP1 | USP44  |
| TFDP1 | USP49  |
| TFDP1 | USP6NL |
| TFDP1 | USP7   |
| TFDP1 | USP9X  |
| TFDP1 | UTP11  |
| TFDP1 | UTP18  |
| TFDP1 | UTP23  |
| TFDP1 | UTP6   |
| TFDP1 | UVRAG  |
| TFDP1 | UXT    |
| TFDP1 | VAMP1  |
| TFDP1 | VAMP8  |
| TFDP1 | VAPA   |
| TFDP1 | VBP1   |
| TFDP1 | VCPIP1 |
| TFDP1 | VDAC1  |
| TFDP1 | VDAC3  |
| TFDP1 | VEZF1  |
| TFDP1 | VEZT   |
| TFDP1 | VGLL4  |
| TFDP1 | VMA21  |
| TFDP1 | VMP1   |
| TFDP1 | VPS13C |
| TFDP1 | VPS16  |
| TFDP1 | VPS25  |
| TFDP1 | VPS26A |
| TFDP1 | VPS37A |
| TFDP1 | VPS37C |
| TFDP1 | VPS4A  |
| TFDP1 | VRK1   |
| TFDP1 | VRK3   |
| TFDP1 | VTI1B  |
| TFDP1 | WAC    |
| TFDP1 | WAPL   |
| TFDP1 | WASF2  |
| TFDP1 | WASL   |
| TFDP1 | WBP11  |
| TFDP1 | WBP1L  |
| TFDP1 | WBP4   |
| TFDP1 | WDHD1  |
| TFDP1 | WDR1   |
| TFDP1 | WDR18  |



|       |            |
|-------|------------|
| TFDP1 | WDR34      |
| TFDP1 | WDR37      |
| TFDP1 | WDR45      |
| TFDP1 | WDR5       |
| TFDP1 | WDR61      |
| TFDP1 | WDR70      |
| TFDP1 | WDR76      |
| TFDP1 | WDR77      |
| TFDP1 | WDR90      |
| TFDP1 | WDR92      |
| TFDP1 | WDT C1     |
| TFDP1 | WDYHV1     |
| TFDP1 | WEE1       |
| TFDP1 | WIPF1      |
| TFDP1 | WIPI2      |
| TFDP1 | WNK1       |
| TFDP1 | WRAP53     |
| TFDP1 | WRAP73     |
| TFDP1 | WRNIP1     |
| TFDP1 | WTAP       |
| TFDP1 | WWOX       |
| TFDP1 | XAB2       |
| TFDP1 | XIAP       |
| TFDP1 | XKR6       |
| TFDP1 | XPNPEP1    |
| TFDP1 | XP01       |
| TFDP1 | XRCC1      |
| TFDP1 | XRCC3      |
| TFDP1 | XRCC4      |
| TFDP1 | XRCC5      |
| TFDP1 | XRCC6      |
| TFDP1 | XRN2       |
| TFDP1 | XXYLT1     |
| TFDP1 | YAF2       |
| TFDP1 | YARS       |
| TFDP1 | YBEY       |
| TFDP1 | YBX1       |
| TFDP1 | YEATS2     |
| TFDP1 | YEATS4     |
| TFDP1 | YIPF1      |
| TFDP1 | YKT6       |
| TFDP1 | YLPM1      |
| TFDP1 | YME1L1     |
| TFDP1 | YPEL3      |
| TFDP1 | YTHDC1     |
| TFDP1 | YTHDC2     |
| TFDP1 | YTHDF2     |
| TFDP1 | YTHDF3-AS1 |
| TFDP1 | YWHAB      |
| TFDP1 | YWHAE      |

|       |           |
|-------|-----------|
| TFDP1 | YWHAG     |
| TFDP1 | YWHAH     |
| TFDP1 | YWHAQ     |
| TFDP1 | YWHAZ     |
| TFDP1 | YY1       |
| TFDP1 | ZBED5     |
| TFDP1 | ZBED5-AS1 |
| TFDP1 | ZBTB14    |
| TFDP1 | ZBTB25    |
| TFDP1 | ZBTB45    |
| TFDP1 | ZBTB8A    |
| TFDP1 | ZBTB80S   |
| TFDP1 | ZC3H13    |
| TFDP1 | ZC3H14    |
| TFDP1 | ZC3H18    |
| TFDP1 | ZC3H6     |
| TFDP1 | ZC3H7A    |
| TFDP1 | ZCCHC17   |
| TFDP1 | ZCCHC3    |
| TFDP1 | ZCCHC7    |
| TFDP1 | ZCCHC9    |
| TFDP1 | ZDHHC13   |
| TFDP1 | ZDHHC16   |
| TFDP1 | ZDHHC4    |
| TFDP1 | ZDHHC5    |
| TFDP1 | ZEB1      |
| TFDP1 | ZFAND3    |
| TFDP1 | ZFAND5    |
| TFDP1 | ZFAND6    |
| TFDP1 | ZFAS1     |
| TFDP1 | ZFP62     |
| TFDP1 | ZFP90     |
| TFDP1 | ZFP91     |
| TFDP1 | ZFR       |
| TFDP1 | ZFX       |
| TFDP1 | ZFYVE19   |
| TFDP1 | ZHX2      |
| TFDP1 | ZMAT5     |
| TFDP1 | ZMPSTE24  |
| TFDP1 | ZMYND8    |
| TFDP1 | ZNF100    |
| TFDP1 | ZNF101    |
| TFDP1 | ZNF106    |
| TFDP1 | ZNF107    |
| TFDP1 | ZNF131    |
| TFDP1 | ZNF143    |
| TFDP1 | ZNF180    |
| TFDP1 | ZNF207    |
| TFDP1 | ZNF212    |
| TFDP1 | ZNF232    |

|       |            |
|-------|------------|
| TFDP1 | ZNF264     |
| TFDP1 | ZNF273     |
| TFDP1 | ZNF280C    |
| TFDP1 | ZNF282     |
| TFDP1 | ZNF296     |
| TFDP1 | ZNF326     |
| TFDP1 | ZNF330     |
| TFDP1 | ZNF335     |
| TFDP1 | ZNF337-AS1 |
| TFDP1 | ZNF346     |
| TFDP1 | ZNF354A    |
| TFDP1 | ZNF414     |
| TFDP1 | ZNF428     |
| TFDP1 | ZNF444     |
| TFDP1 | ZNF511     |
| TFDP1 | ZNF518A    |
| TFDP1 | ZNF519     |
| TFDP1 | ZNF530     |
| TFDP1 | ZNF532     |
| TFDP1 | ZNF576     |
| TFDP1 | ZNF580     |
| TFDP1 | ZNF592     |
| TFDP1 | ZNF598     |
| TFDP1 | ZNF622     |
| TFDP1 | ZNF639     |
| TFDP1 | ZNF644     |
| TFDP1 | ZNF652     |
| TFDP1 | ZNF669     |
| TFDP1 | ZNF670     |
| TFDP1 | ZNF672     |
| TFDP1 | ZNF682     |
| TFDP1 | ZNF687     |
| TFDP1 | ZNF706     |
| TFDP1 | ZNF726     |
| TFDP1 | ZNF75A     |
| TFDP1 | ZNF76      |
| TFDP1 | ZNF775     |
| TFDP1 | ZNF821     |
| TFDP1 | ZNF90      |
| TFDP1 | ZNHIT2     |
| TFDP1 | ZRANB3     |
| TFDP1 | ZSWIM8     |
| TFDP1 | ZWILCH     |
| TFDP1 | ZWINT      |
| TFDP1 | ZXDC       |
| TFDP2 | ABTB1      |
| TFDP2 | ACSL3      |
| TFDP2 | ACTR8      |
| TFDP2 | AGFG2      |
| TFDP2 | ALG10      |

|       |          |
|-------|----------|
| TFDP2 | ANLN     |
| TFDP2 | APPBP2   |
| TFDP2 | ARHGAP44 |
| TFDP2 | ASB6     |
| TFDP2 | ASPM     |
| TFDP2 | ATAD2    |
| TFDP2 | ATL2     |
| TFDP2 | BACE2    |
| TFDP2 | BCLAF1   |
| TFDP2 | BIRC5    |
| TFDP2 | BORA     |
| TFDP2 | BORCS6   |
| TFDP2 | BRIP1    |
| TFDP2 | C6orf47  |
| TFDP2 | C6orf99  |
| TFDP2 | CALR     |
| TFDP2 | CARHSP1  |
| TFDP2 | CCAR2    |
| TFDP2 | CCNB2    |
| TFDP2 | CCNE2    |
| TFDP2 | CCNF     |
| TFDP2 | CCNG1    |
| TFDP2 | CCP110   |
| TFDP2 | CD81     |
| TFDP2 | CDC25B   |
| TFDP2 | CDC27    |
| TFDP2 | CDCA3    |
| TFDP2 | CDCA7    |
| TFDP2 | CDK16    |
| TFDP2 | CDK6     |
| TFDP2 | CDK9     |
| TFDP2 | CDKN2D   |
| TFDP2 | CDT1     |
| TFDP2 | CENPA    |
| TFDP2 | CENPE    |
| TFDP2 | CEP290   |
| TFDP2 | CGGBP1   |
| TFDP2 | CITED2   |
| TFDP2 | CKAP2    |
| TFDP2 | CKAP2L   |
| TFDP2 | CNIH1    |
| TFDP2 | CNOT4    |
| TFDP2 | CNOT8    |
| TFDP2 | COX5A    |
| TFDP2 | CREBZF   |
| TFDP2 | CTPS2    |
| TFDP2 | DCP2     |
| TFDP2 | DDX3X    |
| TFDP2 | DERL1    |
| TFDP2 | DLGAP5   |

|       |             |
|-------|-------------|
| TFDP2 | DPYSL2      |
| TFDP2 | DUSP6       |
| TFDP2 | E2F7        |
| TFDP2 | EDEM1       |
| TFDP2 | EGR1        |
| TFDP2 | EIF3D       |
| TFDP2 | EPB41       |
| TFDP2 | FAIM        |
| TFDP2 | FAM72D      |
| TFDP2 | FAM98A      |
| TFDP2 | FZR1        |
| TFDP2 | GADD45A     |
| TFDP2 | GANAB       |
| TFDP2 | GDF11       |
| TFDP2 | GKAP1       |
| TFDP2 | GLG1        |
| TFDP2 | GTSE1       |
| TFDP2 | HIST1H1B    |
| TFDP2 | HMGN3       |
| TFDP2 | HMGXB4      |
| TFDP2 | HPS3        |
| TFDP2 | IBTK        |
| TFDP2 | IDE         |
| TFDP2 | KDM3B       |
| TFDP2 | KIF18B      |
| TFDP2 | KIF2C       |
| TFDP2 | KIF4A       |
| TFDP2 | KLHDC10     |
| TFDP2 | KMT2A       |
| TFDP2 | KPNA2       |
| TFDP2 | LMCD1       |
| TFDP2 | MAP3K4      |
| TFDP2 | MED25       |
| TFDP2 | MED26       |
| TFDP2 | MIR4435-2HG |
| TFDP2 | MIS18BP1    |
| TFDP2 | MLLT10      |
| TFDP2 | MOB1B       |
| TFDP2 | MORC4       |
| TFDP2 | MPLKIP      |
| TFDP2 | MSI2        |
| TFDP2 | MT1X        |
| TFDP2 | MTA3        |
| TFDP2 | MTURN       |
| TFDP2 | MTX2        |
| TFDP2 | MXD4        |
| TFDP2 | N4BP1       |
| TFDP2 | NAPEPLD     |
| TFDP2 | NDC80       |
| TFDP2 | NDUFS2      |

|       |         |
|-------|---------|
| TFDP2 | NHLRC2  |
| TFDP2 | NOL12   |
| TFDP2 | NUMB    |
| TFDP2 | PAN3    |
| TFDP2 | PBX3    |
| TFDP2 | PCED1B  |
| TFDP2 | PCNT    |
| TFDP2 | PDS5B   |
| TFDP2 | PEG10   |
| TFDP2 | PGM2    |
| TFDP2 | PHF23   |
| TFDP2 | PHIP    |
| TFDP2 | PIF1    |
| TFDP2 | PKN0X1  |
| TFDP2 | PLK1    |
| TFDP2 | PMF1    |
| TFDP2 | PNN     |
| TFDP2 | POLR2D  |
| TFDP2 | PPP1R2  |
| TFDP2 | PPP2R5D |
| TFDP2 | PPP6R3  |
| TFDP2 | PRC1    |
| TFDP2 | PRCP    |
| TFDP2 | RAB5B   |
| TFDP2 | RAD21   |
| TFDP2 | RAPGEF5 |
| TFDP2 | RBMX    |
| TFDP2 | RCCD1   |
| TFDP2 | RDM1    |
| TFDP2 | REEP4   |
| TFDP2 | RPL39L  |
| TFDP2 | RPN2    |
| TFDP2 | RTN2    |
| TFDP2 | RTTN    |
| TFDP2 | SCAF11  |
| TFDP2 | SCLT1   |
| TFDP2 | SLC26A6 |
| TFDP2 | SMARCA5 |
| TFDP2 | SMNDC1  |
| TFDP2 | SNED1   |
| TFDP2 | SPSB3   |
| TFDP2 | SPTAN1  |
| TFDP2 | SSBP2   |
| TFDP2 | STIM2   |
| TFDP2 | SUGT1   |
| TFDP2 | SUZ12   |
| TFDP2 | TBC1D1  |
| TFDP2 | TCF20   |
| TFDP2 | TFDP2   |
| TFDP2 | THG1L   |

|       |            |
|-------|------------|
| TFDP2 | TM7SF2     |
| TFDP2 | TMEM59     |
| TFDP2 | TMEM9      |
| TFDP2 | TNRC6B     |
| TFDP2 | TOPBP1     |
| TFDP2 | TRIM24     |
| TFDP2 | TRIM28     |
| TFDP2 | TRIM37     |
| TFDP2 | TRIM59     |
| TFDP2 | TTC9C      |
| TFDP2 | UAP1       |
| TFDP2 | UBE2C      |
| TFDP2 | UBE2E3     |
| TFDP2 | UBTF       |
| TFDP2 | UCHL1      |
| TFDP2 | VEZT       |
| TFDP2 | WSB1       |
| TFDP2 | XRCC1      |
| TFDP2 | XRCC3      |
| TFDP2 | YTHDF3-AS1 |
| TFDP2 | ZFX        |
| TFDP2 | ZNF670     |
| TFDP2 | ZNF691     |
| TFDP2 | ZNF775     |
| TFDP2 | ZNF804A    |
| TFEC  | ABLIM1     |
| TFEC  | ACP5       |
| TFEC  | ADA        |
| TFEC  | AHNAK      |
| TFEC  | ANXA5      |
| TFEC  | AP5Z1      |
| TFEC  | ARF5       |
| TFEC  | ARF6       |
| TFEC  | ARHGAP10   |
| TFEC  | ARHGDIA    |
| TFEC  | ARID5B     |
| TFEC  | ARL8B      |
| TFEC  | ASXL2      |
| TFEC  | ATF4       |
| TFEC  | ATP1A1     |
| TFEC  | ATP6V0E1   |
| TFEC  | ATP6V1F    |
| TFEC  | BBC3       |
| TFEC  | BCAT1      |
| TFEC  | C19orf48   |
| TFEC  | C19orf70   |
| TFEC  | CAMK2B     |
| TFEC  | CAST       |
| TFEC  | CAV1       |
| TFEC  | CBX6       |

|      |           |
|------|-----------|
| TFEC | CD44      |
| TFEC | CD63      |
| TFEC | CDC42     |
| TFEC | CDC42EP3  |
| TFEC | CFAP97    |
| TFEC | CLIP1     |
| TFEC | CREB5     |
| TFEC | CSTB      |
| TFEC | CTSA      |
| TFEC | DCTN4     |
| TFEC | DENR      |
| TFEC | DOCK9     |
| TFEC | DUSP10    |
| TFEC | DYNLT3    |
| TFEC | EEA1      |
| TFEC | EGLN2     |
| TFEC | EIF3A     |
| TFEC | EMILIN2   |
| TFEC | EN01      |
| TFEC | ENTHD1    |
| TFEC | FAM49A    |
| TFEC | FCMR      |
| TFEC | FLCN      |
| TFEC | FNBP1     |
| TFEC | FOXP1     |
| TFEC | GADD45G   |
| TFEC | GLB1      |
| TFEC | GLRX3     |
| TFEC | GNPDA1    |
| TFEC | GPR183    |
| TFEC | GPRC5C    |
| TFEC | GRN       |
| TFEC | HS1BP3    |
| TFEC | HSPA8     |
| TFEC | IL4I1     |
| TFEC | KAT7      |
| TFEC | KIAA1551  |
| TFEC | KIF13B    |
| TFEC | KIF21A    |
| TFEC | KLF6      |
| TFEC | KPNA1     |
| TFEC | LMNA      |
| TFEC | LRRFIP2   |
| TFEC | LYSMD2    |
| TFEC | MACROD2   |
| TFEC | MAPKAPK3  |
| TFEC | MIR155HG  |
| TFEC | MIR3142HG |
| TFEC | MVP       |
| TFEC | NFE2L1    |



|      |          |
|------|----------|
| TFEC | NME2     |
| TFEC | PDCD4    |
| TFEC | PIAS4    |
| TFEC | PMEPA1   |
| TFEC | PPP1R15A |
| TFEC | PTPN1    |
| TFEC | RAB13    |
| TFEC | RAB7A    |
| TFEC | RCAN3    |
| TFEC | RDX      |
| TFEC | RHOF     |
| TFEC | RPL17    |
| TFEC | RPS27    |
| TFEC | RPS29    |
| TFEC | RRAGC    |
| TFEC | RRP9     |
| TFEC | RTN4     |
| TFEC | S100A6   |
| TFEC | SCRN1    |
| TFEC | SDHAF1   |
| TFEC | SEPT7    |
| TFEC | SERPINA9 |
| TFEC | SGK1     |
| TFEC | SIRT1    |
| TFEC | SLC16A7  |
| TFEC | SLC25A51 |
| TFEC | SLC35E3  |
| TFEC | SLC38A5  |
| TFEC | SLC39A1  |
| TFEC | SLC4A2   |
| TFEC | SLC4A8   |
| TFEC | SMPDL3A  |
| TFEC | SQSTM1   |
| TFEC | STAT6    |
| TFEC | TAGLN2   |
| TFEC | TCAF1    |
| TFEC | TES      |
| TFEC | TFEC     |
| TFEC | THAP7    |
| TFEC | TMEM120B |
| TFEC | TMEM192  |
| TFEC | TNIP2    |
| TFEC | TRAF1    |
| TFEC | TRPV2    |
| TFEC | TSC22D2  |
| TFEC | UBC      |
| TFEC | USP28    |
| TFEC | UTP14A   |
| TFEC | VPS72    |
| TFEC | WDFY1    |

|       |          |
|-------|----------|
| TFEC  | YPEL1    |
| TFEC  | ZEB2     |
| TFEC  | ZFHX3    |
| TFEC  | ZNF165   |
| TFEC  | ZNF318   |
| TFEC  | ZNF322   |
| TFEC  | ZNF385C  |
| THAP1 | AHCYL1   |
| THAP1 | ANAPC2   |
| THAP1 | ANKRD13D |
| THAP1 | AP1G2    |
| THAP1 | APEH     |
| THAP1 | API5     |
| THAP1 | ARF1     |
| THAP1 | ARHGAP4  |
| THAP1 | ARHGEF12 |
| THAP1 | ARL5B    |
| THAP1 | ARNT     |
| THAP1 | ARV1     |
| THAP1 | ASB2     |
| THAP1 | ATG5     |
| THAP1 | ATP23    |
| THAP1 | ATP6V0E1 |
| THAP1 | ATP6V1H  |
| THAP1 | ATXN1    |
| THAP1 | B9D2     |
| THAP1 | BCL2L13  |
| THAP1 | BICD2    |
| THAP1 | BRCA1    |
| THAP1 | C1orf112 |
| THAP1 | C8orf59  |
| THAP1 | CAMK2D   |
| THAP1 | CBL      |
| THAP1 | CCDC107  |
| THAP1 | CCDC127  |
| THAP1 | CCDC34   |
| THAP1 | CCND1    |
| THAP1 | CD24     |
| THAP1 | CDCA5    |
| THAP1 | CDCA7    |
| THAP1 | CDKN2D   |
| THAP1 | CEBPB    |
| THAP1 | CENPI    |
| THAP1 | CHD2     |
| THAP1 | CHP1     |
| THAP1 | CHPF2    |
| THAP1 | CHST15   |
| THAP1 | CHTOP    |
| THAP1 | CIRBP    |
| THAP1 | CMTR2    |

|       |            |
|-------|------------|
| THAP1 | COL4A3BP   |
| THAP1 | COPB1      |
| THAP1 | COR07      |
| THAP1 | CSGALNACT2 |
| THAP1 | CTCF       |
| THAP1 | CYB561     |
| THAP1 | CYP2R1     |
| THAP1 | DBF4       |
| THAP1 | DCP1A      |
| THAP1 | DCTN1      |
| THAP1 | DCTN5      |
| THAP1 | DDX10      |
| THAP1 | DERL3      |
| THAP1 | DLG1       |
| THAP1 | DMD        |
| THAP1 | DNAJC4     |
| THAP1 | DOCK9      |
| THAP1 | DYM        |
| THAP1 | E2F8       |
| THAP1 | EBP        |
| THAP1 | EFCAB14    |
| THAP1 | ELK1       |
| THAP1 | ELM02      |
| THAP1 | ELMSAN1    |
| THAP1 | ERI2       |
| THAP1 | ERP44      |
| THAP1 | FAF1       |
| THAP1 | FAM173A    |
| THAP1 | FAM184B    |
| THAP1 | FAM76A     |
| THAP1 | FBX046     |
| THAP1 | FBX07      |
| THAP1 | FBX09      |
| THAP1 | FBXW11     |
| THAP1 | FGD3       |
| THAP1 | FLVCR1     |
| THAP1 | FNBP4      |
| THAP1 | FTSJ3      |
| THAP1 | GADD45B    |
| THAP1 | GDAP1      |
| THAP1 | GEN1       |
| THAP1 | GPI        |
| THAP1 | GSN        |
| THAP1 | GTF2H5     |
| THAP1 | H2AFX      |
| THAP1 | HAUS7      |
| THAP1 | HGSNAT     |
| THAP1 | HOXB4      |
| THAP1 | IDI1       |
| THAP1 | IFT122     |

|       |           |
|-------|-----------|
| THAP1 | IGBP1     |
| THAP1 | IKBKE     |
| THAP1 | IN080E    |
| THAP1 | IRF5      |
| THAP1 | KAT8      |
| THAP1 | KCNK12    |
| THAP1 | KDF1      |
| THAP1 | KIFC1     |
| THAP1 | KMT5C     |
| THAP1 | LEPROT    |
| THAP1 | LINC00467 |
| THAP1 | LMCD1     |
| THAP1 | LPXN      |
| THAP1 | LRP10     |
| THAP1 | LRRC75A   |
| THAP1 | MAK16     |
| THAP1 | MAN1B1    |
| THAP1 | MAP2K7    |
| THAP1 | MAP3K11   |
| THAP1 | MAP4K4    |
| THAP1 | MAPK10    |
| THAP1 | MARCH3    |
| THAP1 | MARCH7    |
| THAP1 | MEAF6     |
| THAP1 | MED16     |
| THAP1 | MFSD9     |
| THAP1 | MIOS      |
| THAP1 | MMS22L    |
| THAP1 | MON2      |
| THAP1 | MRM1      |
| THAP1 | MRPS16    |
| THAP1 | MTERF4    |
| THAP1 | MTFR1L    |
| THAP1 | MTOR      |
| THAP1 | MYEF2     |
| THAP1 | NAE1      |
| THAP1 | NBEAL1    |
| THAP1 | NFKB2     |
| THAP1 | NOL9      |
| THAP1 | NOP10     |
| THAP1 | NOSIP     |
| THAP1 | ODF2L     |
| THAP1 | OSBPL11   |
| THAP1 | PAGR1     |
| THAP1 | PAK1IP1   |
| THAP1 | PCM1      |
| THAP1 | PCNT      |
| THAP1 | PER1      |
| THAP1 | PEX2      |
| THAP1 | PI4KA     |

|       |           |
|-------|-----------|
| THAP1 | PIBF1     |
| THAP1 | PIGO      |
| THAP1 | POLR1A    |
| THAP1 | PPP1R10   |
| THAP1 | PPP1R11   |
| THAP1 | PPP1R12A  |
| THAP1 | PPP1R35   |
| THAP1 | PQLC1     |
| THAP1 | PRKAR1A   |
| THAP1 | PRKCZ     |
| THAP1 | PRPS2     |
| THAP1 | PRR13     |
| THAP1 | PRR14     |
| THAP1 | PSMA3-AS1 |
| THAP1 | PSMD1     |
| THAP1 | PSMD7     |
| THAP1 | PTS       |
| THAP1 | PTTG1IP   |
| THAP1 | RAB27A    |
| THAP1 | RALGPS1   |
| THAP1 | RAPGEF1   |
| THAP1 | RBL2      |
| THAP1 | RBM23     |
| THAP1 | RBM7      |
| THAP1 | RBM8A     |
| THAP1 | RECQL5    |
| THAP1 | RFWD3     |
| THAP1 | RGMB      |
| THAP1 | RIT1      |
| THAP1 | RNF219    |
| THAP1 | RNF24     |
| THAP1 | RNF40     |
| THAP1 | RNF41     |
| THAP1 | RPGR      |
| THAP1 | RRAGC     |
| THAP1 | RREB1     |
| THAP1 | RSPRY1    |
| THAP1 | SACM1L    |
| THAP1 | SAP18     |
| THAP1 | SAPCD2    |
| THAP1 | SC5D      |
| THAP1 | SENP5     |
| THAP1 | SF3B3     |
| THAP1 | SG02      |
| THAP1 | SGPL1     |
| THAP1 | SH3BGRL   |
| THAP1 | SH3BP2    |
| THAP1 | SIGLEC10  |
| THAP1 | SLC2A1    |
| THAP1 | SLC5A3    |

|       |           |
|-------|-----------|
| THAP1 | SLC9B2    |
| THAP1 | SMTN      |
| THAP1 | SMUG1     |
| THAP1 | SPC25     |
| THAP1 | SRSF10    |
| THAP1 | STAG3     |
| THAP1 | TBC1D5    |
| THAP1 | TFCP2     |
| THAP1 | TFPT      |
| THAP1 | THAP1     |
| THAP1 | TLE1      |
| THAP1 | TMED7     |
| THAP1 | TMEM263   |
| THAP1 | TMEM33    |
| THAP1 | TMEM69    |
| THAP1 | TMEM87A   |
| THAP1 | TMUB1     |
| THAP1 | TNFAIP1   |
| THAP1 | TNKS2     |
| THAP1 | TOMM34    |
| THAP1 | TP53RK    |
| THAP1 | TPM3      |
| THAP1 | TRAF5     |
| THAP1 | TSNAX     |
| THAP1 | TTK       |
| THAP1 | TUBG1     |
| THAP1 | TUT1      |
| THAP1 | TVP23C    |
| THAP1 | TXNL4B    |
| THAP1 | UBE2G2    |
| THAP1 | UEVLD     |
| THAP1 | UGT8      |
| THAP1 | USP53     |
| THAP1 | VIPAS39   |
| THAP1 | VPS26A    |
| THAP1 | VPS26B    |
| THAP1 | VPS37A    |
| THAP1 | VPS51     |
| THAP1 | WDFY1     |
| THAP1 | WDR12     |
| THAP1 | XAB2      |
| THAP1 | YBX1      |
| THAP1 | ZBED5-AS1 |
| THAP1 | ZC3H12A   |
| THAP1 | ZCCHC7    |
| THAP1 | ZFP90     |
| THAP1 | ZNF526    |
| THAP1 | ZNF562    |
| THAP1 | ZNF628    |
| THAP1 | ZNF678    |

|        |           |
|--------|-----------|
| THAP1  | ZNF785    |
| THAP11 | ACAT2     |
| THAP11 | ACTR1A    |
| THAP11 | ADAR      |
| THAP11 | ADNP      |
| THAP11 | ADPRH     |
| THAP11 | ADSS      |
| THAP11 | AHCYL1    |
| THAP11 | AHDC1     |
| THAP11 | AK4       |
| THAP11 | ALDOC     |
| THAP11 | ARL4C     |
| THAP11 | ARMC9     |
| THAP11 | ARSK      |
| THAP11 | ASH1L-AS1 |
| THAP11 | ASPH      |
| THAP11 | ASXL2     |
| THAP11 | ATP6V1A   |
| THAP11 | BANP      |
| THAP11 | BCAT2     |
| THAP11 | BCKDK     |
| THAP11 | BORCS5    |
| THAP11 | C12orf43  |
| THAP11 | C20orf96  |
| THAP11 | CACYBP    |
| THAP11 | CANT1     |
| THAP11 | CBX1      |
| THAP11 | CCNT2     |
| THAP11 | CD163L1   |
| THAP11 | CELF1     |
| THAP11 | CENPT     |
| THAP11 | CERS2     |
| THAP11 | CHAF1A    |
| THAP11 | CHMP1A    |
| THAP11 | CLDND1    |
| THAP11 | CLOCK     |
| THAP11 | CLPB      |
| THAP11 | CLSPN     |
| THAP11 | CMPK1     |
| THAP11 | CNPY3     |
| THAP11 | COPE      |
| THAP11 | CTHRC1    |
| THAP11 | DCTN2     |
| THAP11 | DDX24     |
| THAP11 | DFFA      |
| THAP11 | DHX37     |
| THAP11 | DICER1    |
| THAP11 | DNAJB5    |
| THAP11 | DNAL1     |
| THAP11 | DOCK9     |

THAP11 DOPEY1  
THAP11 E2F1  
THAP11 EEF1B2  
THAP11 EEF2  
THAP11 EHD1  
THAP11 EMD  
THAP11 EXOC5  
THAP11 FAM96A  
THAP11 FASTKD1  
THAP11 FBX038  
THAP11 FHOD1  
THAP11 FLVCR1  
THAP11 FYN  
THAP11 FZD3  
THAP11 GABPB1-AS1  
THAP11 GATB  
THAP11 GL01  
THAP11 GMNN  
THAP11 GNAS  
THAP11 GPATCH3  
THAP11 GPBP1L1  
THAP11 HACD3  
THAP11 HDAC3  
THAP11 ICMT  
THAP11 IFT52  
THAP11 ING2  
THAP11 IRF1  
THAP11 JTB  
THAP11 KHK  
THAP11 KIAA0355  
THAP11 KLHL23  
THAP11 LCMT2  
THAP11 LRBA  
THAP11 LSM2  
THAP11 LUC7L  
THAP11 LYRM1  
THAP11 MAGED1  
THAP11 MAPK8  
THAP11 MAPRE2  
THAP11 MAST4  
THAP11 MBP  
THAP11 MESP1  
THAP11 MET  
THAP11 METTL2B  
THAP11 MFSD3  
THAP11 MRPL23  
THAP11 MRPS31  
THAP11 MTMR2  
THAP11 MXD4  
THAP11 N4BP2L1



|        |          |
|--------|----------|
| THAP11 | NACA     |
| THAP11 | NBPF12   |
| THAP11 | NDUFB2   |
| THAP11 | NOL11    |
| THAP11 | NPEPPS   |
| THAP11 | NPRL2    |
| THAP11 | NR4A1    |
| THAP11 | NTPCR    |
| THAP11 | NXT2     |
| THAP11 | ODF2     |
| THAP11 | PALD1    |
| THAP11 | PARS2    |
| THAP11 | PEX6     |
| THAP11 | PIDD1    |
| THAP11 | PIK3R1   |
| THAP11 | PKN2     |
| THAP11 | PLGRKT   |
| THAP11 | POGZ     |
| THAP11 | POP1     |
| THAP11 | PPP1R14B |
| THAP11 | PRH1     |
| THAP11 | PRPF19   |
| THAP11 | PRR14L   |
| THAP11 | PSMC3    |
| THAP11 | PSMD14   |
| THAP11 | PSMD5    |
| THAP11 | RAB29    |
| THAP11 | RAB34    |
| THAP11 | RAD9A    |
| THAP11 | RAPGEF6  |
| THAP11 | RBM15B   |
| THAP11 | REX02    |
| THAP11 | RFC5     |
| THAP11 | RHOT1    |
| THAP11 | RPL13    |
| THAP11 | RPL15    |
| THAP11 | RPL17    |
| THAP11 | RPL18A   |
| THAP11 | RPL22    |
| THAP11 | RPL23A   |
| THAP11 | RPL26    |
| THAP11 | RPL29    |
| THAP11 | RPL30    |
| THAP11 | RPL31    |
| THAP11 | RPL32    |
| THAP11 | RPL34    |
| THAP11 | RPL35A   |
| THAP11 | RPL38    |
| THAP11 | RPL41    |
| THAP11 | RPL7     |

|        |          |
|--------|----------|
| THAP11 | RPL8     |
| THAP11 | RPLP2    |
| THAP11 | RPP40    |
| THAP11 | RPS11    |
| THAP11 | RPS13    |
| THAP11 | RPS15A   |
| THAP11 | RPS19    |
| THAP11 | RPS23    |
| THAP11 | RPS26    |
| THAP11 | RPS27    |
| THAP11 | RPS27A   |
| THAP11 | RPS29    |
| THAP11 | RPS3     |
| THAP11 | RPS5     |
| THAP11 | RSF1     |
| THAP11 | RTN3     |
| THAP11 | RYBP     |
| THAP11 | S100A13  |
| THAP11 | SCAF1    |
| THAP11 | SCRN2    |
| THAP11 | SF1      |
| THAP11 | SF3B5    |
| THAP11 | SGSM3    |
| THAP11 | SKP2     |
| THAP11 | SLAIN1   |
| THAP11 | SLC10A3  |
| THAP11 | SLC16A1  |
| THAP11 | SLC25A11 |
| THAP11 | SLC39A1  |
| THAP11 | SLC5A3   |
| THAP11 | SMAP1    |
| THAP11 | SMC3     |
| THAP11 | SMKR1    |
| THAP11 | SMYD2    |
| THAP11 | SNHG19   |
| THAP11 | SNX3     |
| THAP11 | SRP72    |
| THAP11 | SRRM2    |
| THAP11 | SSTR2    |
| THAP11 | STOML2   |
| THAP11 | SUCLG1   |
| THAP11 | TAGLN2   |
| THAP11 | TBC1D24  |
| THAP11 | TDRD7    |
| THAP11 | TFAP4    |
| THAP11 | TFIP11   |
| THAP11 | THAP11   |
| THAP11 | THAP4    |
| THAP11 | THAP7    |
| THAP11 | TIAL1    |

|        |          |
|--------|----------|
| THAP11 | TMEM109  |
| THAP11 | TMEM14A  |
| THAP11 | TOP3A    |
| THAP11 | TRIM8    |
| THAP11 | TRMT2B   |
| THAP11 | TSC22D1  |
| THAP11 | TUBGCP5  |
| THAP11 | UBA52    |
| THAP11 | UBE2E1   |
| THAP11 | UBP1     |
| THAP11 | UBR5     |
| THAP11 | UGDH     |
| THAP11 | UNK      |
| THAP11 | USP24    |
| THAP11 | UVRAG    |
| THAP11 | VEZT     |
| THAP11 | YTHDC2   |
| THAP11 | YWHAG    |
| THAP11 | ZMYM3    |
| THAP11 | ZNF143   |
| THAP11 | ZNF212   |
| THAP11 | ZNF318   |
| THAP11 | ZNF37A   |
| THAP11 | ZNF580   |
| THAP11 | ZNF598   |
| THAP11 | ZNF680   |
| THAP11 | ZNF837   |
| TP53   | ADSS     |
| TP53   | AHCY     |
| TP53   | ALDH1B1  |
| TP53   | ARHGAP44 |
| TP53   | BCAT2    |
| TP53   | C4orf46  |
| TP53   | CCDC25   |
| TP53   | CCT7     |
| TP53   | CDC42    |
| TP53   | CDC6     |
| TP53   | CHST10   |
| TP53   | COBLL1   |
| TP53   | COX7B    |
| TP53   | CSNK2B   |
| TP53   | DHX33    |
| TP53   | DPH2     |
| TP53   | EIF2B4   |
| TP53   | EIF2B5   |
| TP53   | EIF2S2   |
| TP53   | EIF5A    |
| TP53   | ETV5     |
| TP53   | FAM189B  |
| TP53   | FAM41C   |

|      |          |
|------|----------|
| TP53 | FAM81A   |
| TP53 | FKBP4    |
| TP53 | FYN      |
| TP53 | GIT1     |
| TP53 | GL01     |
| TP53 | GPT2     |
| TP53 | H1F0     |
| TP53 | HCFC1R1  |
| TP53 | HSP90AB1 |
| TP53 | IFRD2    |
| TP53 | IN080D   |
| TP53 | IQGAP3   |
| TP53 | KAT2A    |
| TP53 | KCTD17   |
| TP53 | KPNA3    |
| TP53 | KRBA1    |
| TP53 | LARS     |
| TP53 | LTA4H    |
| TP53 | MCM3     |
| TP53 | MCMBP    |
| TP53 | MCRIP2   |
| TP53 | MDM4     |
| TP53 | MRPL11   |
| TP53 | MRPS26   |
| TP53 | MTA2     |
| TP53 | MVB12A   |
| TP53 | NCLN     |
| TP53 | NDUFB2   |
| TP53 | NFKBIB   |
| TP53 | NOP14    |
| TP53 | NR6A1    |
| TP53 | NUTF2    |
| TP53 | ORC4     |
| TP53 | OTUD4    |
| TP53 | PA2G4    |
| TP53 | PDCD2L   |
| TP53 | PDE4D    |
| TP53 | PDE4DIP  |
| TP53 | PHB      |
| TP53 | POP1     |
| TP53 | PPP1CB   |
| TP53 | PPP1R14B |
| TP53 | PPTC7    |
| TP53 | PRPF19   |
| TP53 | PTDSS2   |
| TP53 | RBL1     |
| TP53 | RDH14    |
| TP53 | RPIA     |
| TP53 | RPL6     |
| TP53 | RPL7     |

|      |          |
|------|----------|
| TP53 | RPP40    |
| TP53 | RPS13    |
| TP53 | RPS5     |
| TP53 | RRP7A    |
| TP53 | RRS1     |
| TP53 | SERBP1   |
| TP53 | SH2B1    |
| TP53 | SHMT2    |
| TP53 | SIPA1L3  |
| TP53 | SLC20A2  |
| TP53 | SLC25A19 |
| TP53 | SNX11    |
| TP53 | SYMPK    |
| TP53 | TCOF1    |
| TP53 | TIMM13   |
| TP53 | TIMM22   |
| TP53 | TMEM69   |
| TP53 | TP53     |
| TP53 | TSC2     |
| TP53 | TXLNG    |
| TP53 | UBE2D1   |
| TP53 | VIPAS39  |
| TP53 | WRAP73   |
| TP53 | WRNIP1   |
| TP53 | YBX1     |
| TP53 | ZFC3H1   |
| TP53 | ZNF566   |
| TP53 | ZNF567   |
| TP53 | ZNF587   |
| TP53 | ZRANB3   |
| USF2 | ABHD17A  |
| USF2 | ACAP3    |
| USF2 | ACBD3    |
| USF2 | AC02     |
| USF2 | ACP5     |
| USF2 | ACTG1    |
| USF2 | ADORA2A  |
| USF2 | ADPGK    |
| USF2 | AG02     |
| USF2 | AGPAT1   |
| USF2 | AGPAT2   |
| USF2 | AHI1     |
| USF2 | AKAP10   |
| USF2 | ALKBH3   |
| USF2 | ANAPC10  |
| USF2 | ANKH     |
| USF2 | ANKRD17  |
| USF2 | ANKRD46  |
| USF2 | ANXA4    |
| USF2 | ANXA6    |

|      |          |
|------|----------|
| USF2 | AP5M1    |
| USF2 | APPL2    |
| USF2 | ARFGEF1  |
| USF2 | ARHGAP15 |
| USF2 | ARHGAP17 |
| USF2 | ARHGAP24 |
| USF2 | ARHGAP27 |
| USF2 | ARHGAP4  |
| USF2 | ARHGDIA  |
| USF2 | ARHGDIB  |
| USF2 | ARID5B   |
| USF2 | ARMCX6   |
| USF2 | ARPC1B   |
| USF2 | ARRDC1   |
| USF2 | ASAH1    |
| USF2 | ASB6     |
| USF2 | ASF1A    |
| USF2 | ASPSCR1  |
| USF2 | ATP11B   |
| USF2 | ATP6V0D1 |
| USF2 | ATP6V0E1 |
| USF2 | ATP6V1C1 |
| USF2 | ATP6V1D  |
| USF2 | ATP6V1F  |
| USF2 | ATP6V1G1 |
| USF2 | B3GAT3   |
| USF2 | B9D2     |
| USF2 | BABAM1   |
| USF2 | BATF     |
| USF2 | BAX      |
| USF2 | BBS7     |
| USF2 | BBX      |
| USF2 | BCAS3    |
| USF2 | BCL11A   |
| USF2 | BDP1     |
| USF2 | BET1     |
| USF2 | BEX4     |
| USF2 | BFSP2    |
| USF2 | BICDL1   |
| USF2 | BIK      |
| USF2 | BLCAP    |
| USF2 | BLOC1S1  |
| USF2 | BPTF     |
| USF2 | BRI3     |
| USF2 | BRK1     |
| USF2 | BTAF1    |
| USF2 | BTBD7    |
| USF2 | BTG1     |
| USF2 | C12orf65 |
| USF2 | C1orf43  |

|      |          |
|------|----------|
| USF2 | C4orf3   |
| USF2 | C6orf52  |
| USF2 | C7orf50  |
| USF2 | CAMK2B   |
| USF2 | CC2D1B   |
| USF2 | CCR6     |
| USF2 | CCR7     |
| USF2 | CD180    |
| USF2 | CD2AP    |
| USF2 | CEP164   |
| USF2 | CEP85L   |
| USF2 | CERK     |
| USF2 | CFDP1    |
| USF2 | CHFR     |
| USF2 | CHIC2    |
| USF2 | CHMP4A   |
| USF2 | CIB1     |
| USF2 | CLK3     |
| USF2 | CLK4     |
| USF2 | CLN3     |
| USF2 | CLTB     |
| USF2 | CLTC     |
| USF2 | CLUAP1   |
| USF2 | CMC1     |
| USF2 | CNOT4    |
| USF2 | CNR1     |
| USF2 | COMMD3   |
| USF2 | COMMD4   |
| USF2 | COMMD7   |
| USF2 | COMMD9   |
| USF2 | COR01B   |
| USF2 | COR07    |
| USF2 | CPNE1    |
| USF2 | CREM     |
| USF2 | CSNK1G2  |
| USF2 | CSTB     |
| USF2 | CTNNBIP1 |
| USF2 | CTNS     |
| USF2 | CTSA     |
| USF2 | CYSTM1   |
| USF2 | CYTIP    |
| USF2 | DAP      |
| USF2 | DAZAP2   |
| USF2 | DBI      |
| USF2 | DBP      |
| USF2 | DCAF5    |
| USF2 | DDT      |
| USF2 | DENND1C  |
| USF2 | DENND4A  |
| USF2 | DENND4C  |

|      |            |
|------|------------|
| USF2 | DFFA       |
| USF2 | DGCR2      |
| USF2 | DGKD       |
| USF2 | DHDDS      |
| USF2 | DIAPH1     |
| USF2 | DICER1     |
| USF2 | DNAJA4     |
| USF2 | DNAJB5     |
| USF2 | DNAJC8     |
| USF2 | DOK1       |
| USF2 | DOK3       |
| USF2 | DPP7       |
| USF2 | DRAM2      |
| USF2 | DTX2       |
| USF2 | DTX3       |
| USF2 | DUSP23     |
| USF2 | DYM        |
| USF2 | EEF1D      |
| USF2 | EFHD2      |
| USF2 | EGLN2      |
| USF2 | EIF2AK4    |
| USF2 | EIF2B1     |
| USF2 | EIF3D      |
| USF2 | ELF1       |
| USF2 | ELF4       |
| USF2 | ELM01      |
| USF2 | ELP5       |
| USF2 | EN02       |
| USF2 | ENTPD1-AS1 |
| USF2 | EPC1       |
| USF2 | ERMARD     |
| USF2 | ERP29      |
| USF2 | ETV5       |
| USF2 | EYA3       |
| USF2 | FAM102A    |
| USF2 | FAM172A    |
| USF2 | FAM24B     |
| USF2 | FAM3C      |
| USF2 | FAM50A     |
| USF2 | FAM53B     |
| USF2 | FAM53C     |
| USF2 | FAU        |
| USF2 | FBX025     |
| USF2 | FBX034     |
| USF2 | FBX042     |
| USF2 | FCER2      |
| USF2 | FCMR       |
| USF2 | FDFT1      |
| USF2 | FKBP8      |
| USF2 | FLI1       |



|      |           |
|------|-----------|
| USF2 | FNIP1     |
| USF2 | FOXN3     |
| USF2 | FOXRED2   |
| USF2 | FRYL      |
| USF2 | FTH1      |
| USF2 | FURIN     |
| USF2 | GABARAP   |
| USF2 | GABARAPL2 |
| USF2 | GAS6-AS1  |
| USF2 | GATAD2B   |
| USF2 | GBA       |
| USF2 | GCNT1     |
| USF2 | GHDC      |
| USF2 | GMDS      |
| USF2 | GNB1      |
| USF2 | GNB2      |
| USF2 | GNG5      |
| USF2 | GNG7      |
| USF2 | GPAT4     |
| USF2 | GPM6B     |
| USF2 | GPR160    |
| USF2 | GPR18     |
| USF2 | GPR89A    |
| USF2 | GRB2      |
| USF2 | GRN       |
| USF2 | GTF2F1    |
| USF2 | GTF2IRD1  |
| USF2 | GZF1      |
| USF2 | H3F3A     |
| USF2 | HEXA      |
| USF2 | HEXB      |
| USF2 | HIF1A     |
| USF2 | HLA-DMB   |
| USF2 | HMGN1     |
| USF2 | H00K2     |
| USF2 | HPCAL1    |
| USF2 | HPS4      |
| USF2 | HSD17B7   |
| USF2 | HSDL1     |
| USF2 | HTR3A     |
| USF2 | ICA1L     |
| USF2 | ICE1      |
| USF2 | IDS       |
| USF2 | IGF2R     |
| USF2 | INPP5D    |
| USF2 | INPP5F    |
| USF2 | INTS3     |
| USF2 | IRF4      |
| USF2 | IRF9      |
| USF2 | ITGB2     |

|      |           |
|------|-----------|
| USF2 | JADE1     |
| USF2 | JAK1      |
| USF2 | JMJD1C    |
| USF2 | JUND      |
| USF2 | KANSL1    |
| USF2 | KAT6A     |
| USF2 | KCNN4     |
| USF2 | KDM4C     |
| USF2 | KHSRP     |
| USF2 | KIAA0355  |
| USF2 | KIAA2013  |
| USF2 | KLF6      |
| USF2 | KLHL12    |
| USF2 | KLHL5     |
| USF2 | KMT5A     |
| USF2 | LAMTOR1   |
| USF2 | LARP7     |
| USF2 | LBH       |
| USF2 | LCK       |
| USF2 | LCMT1     |
| USF2 | LGALS8    |
| USF2 | LINC00426 |
| USF2 | LMBRD1    |
| USF2 | LM02      |
| USF2 | LM04      |
| USF2 | LPP       |
| USF2 | LRIF1     |
| USF2 | LRRFIP1   |
| USF2 | LTA4H     |
| USF2 | LUZP1     |
| USF2 | M6PR      |
| USF2 | MAD2L2    |
| USF2 | MANBA     |
| USF2 | MAP1LC3B  |
| USF2 | MAP3K12   |
| USF2 | MAPK8     |
| USF2 | MAST3     |
| USF2 | MBD2      |
| USF2 | MCM10     |
| USF2 | MCRIP1    |
| USF2 | MED12L    |
| USF2 | MEF2C     |
| USF2 | MEF2D     |
| USF2 | MFF       |
| USF2 | MFSD14C   |
| USF2 | MIB2      |
| USF2 | MIR3681HG |
| USF2 | MLXIP     |
| USF2 | MMS19     |
| USF2 | MRPL23    |

|      |            |
|------|------------|
| USF2 | MS4A1      |
| USF2 | MSL2       |
| USF2 | MSRA       |
| USF2 | MTCH1      |
| USF2 | MTHFR      |
| USF2 | MYH9       |
| USF2 | MYL12A     |
| USF2 | MYL5       |
| USF2 | MYO1G      |
| USF2 | MYO6       |
| USF2 | NAA60      |
| USF2 | NAPA       |
| USF2 | NCF4       |
| USF2 | NDE1       |
| USF2 | NDUFB2     |
| USF2 | NEAT1      |
| USF2 | NELFA      |
| USF2 | NFAT5      |
| USF2 | NINJ2      |
| USF2 | NNT-AS1    |
| USF2 | NOM1       |
| USF2 | NPC2       |
| USF2 | NRAS       |
| USF2 | NRGN       |
| USF2 | NTHL1      |
| USF2 | NUDT18     |
| USF2 | NUP50      |
| USF2 | NUTM2A-AS1 |
| USF2 | OPA3       |
| USF2 | ORAI2      |
| USF2 | OSBP       |
| USF2 | OSBPL9     |
| USF2 | OTUD1      |
| USF2 | OTULIN     |
| USF2 | PAFAH1B3   |
| USF2 | PAG1       |
| USF2 | PCM1       |
| USF2 | PCYT2      |
| USF2 | PDK2       |
| USF2 | PDPK1      |
| USF2 | PEPD       |
| USF2 | PER2       |
| USF2 | PGBD2      |
| USF2 | PHF21A     |
| USF2 | PHF8       |
| USF2 | PHYKPL     |
| USF2 | PI4KB      |
| USF2 | PIAS4      |
| USF2 | PIK3R1     |
| USF2 | PKIG       |

|      |           |
|------|-----------|
| USF2 | PLEKHF2   |
| USF2 | PLIN2     |
| USF2 | POLD4     |
| USF2 | POM121    |
| USF2 | POP4      |
| USF2 | POU2F1    |
| USF2 | PPM1B     |
| USF2 | PPP6R1    |
| USF2 | PPRC1     |
| USF2 | PPT1      |
| USF2 | PQLC1     |
| USF2 | PRKCD     |
| USF2 | PRMT9     |
| USF2 | PRPSAP2   |
| USF2 | PSMB8-AS1 |
| USF2 | PTAFR     |
| USF2 | PTCH1     |
| USF2 | PTPN6     |
| USF2 | PTPRN2    |
| USF2 | PTPRS     |
| USF2 | QRICH1    |
| USF2 | QTRT1     |
| USF2 | RAB11B    |
| USF2 | RAB2A     |
| USF2 | RAB7A     |
| USF2 | RAB9A     |
| USF2 | RABGAP1L  |
| USF2 | RABL6     |
| USF2 | RALGPS2   |
| USF2 | RASAL3    |
| USF2 | RASSF5    |
| USF2 | RB1       |
| USF2 | RBM19     |
| USF2 | RBM23     |
| USF2 | RBM42     |
| USF2 | RC3H2     |
| USF2 | RFX1      |
| USF2 | RGS14     |
| USF2 | RGS20     |
| USF2 | RHBDF2    |
| USF2 | RHOBTB2   |
| USF2 | RMDN3     |
| USF2 | RNF139    |
| USF2 | RNF14     |
| USF2 | RNF141    |
| USF2 | RNF19B    |
| USF2 | ROR1      |
| USF2 | RPL13     |
| USF2 | RPL13A    |
| USF2 | RPL15     |

|      |          |
|------|----------|
| USF2 | RPL18    |
| USF2 | RPL19    |
| USF2 | RPL21    |
| USF2 | RPL24    |
| USF2 | RPL37A   |
| USF2 | RPL38    |
| USF2 | RPL41    |
| USF2 | RPLP2    |
| USF2 | RPS11    |
| USF2 | RPS27    |
| USF2 | RPS28    |
| USF2 | RPS29    |
| USF2 | RPS3A    |
| USF2 | RPS6KB2  |
| USF2 | RRAGC    |
| USF2 | RRBP1    |
| USF2 | S100PBP  |
| USF2 | S1PR2    |
| USF2 | SAP130   |
| USF2 | SCAF4    |
| USF2 | SCFD2    |
| USF2 | SCIMP    |
| USF2 | SCPEP1   |
| USF2 | SDHC     |
| USF2 | SEC11A   |
| USF2 | SEL1L3   |
| USF2 | SEPHS2   |
| USF2 | SEPT6    |
| USF2 | SERF2    |
| USF2 | SGF29    |
| USF2 | SH3BP5   |
| USF2 | SH3KBP1  |
| USF2 | SIDT2    |
| USF2 | SIK3     |
| USF2 | SIRT1    |
| USF2 | SKAP2    |
| USF2 | SKIV2L   |
| USF2 | SLC10A3  |
| USF2 | SLC12A8  |
| USF2 | SLC19A1  |
| USF2 | SLC23A2  |
| USF2 | SLC25A25 |
| USF2 | SLC25A36 |
| USF2 | SLC25A37 |
| USF2 | SLC25A46 |
| USF2 | SLC2A3   |
| USF2 | SLC2A6   |
| USF2 | SLC46A3  |
| USF2 | SLC4A7   |
| USF2 | SLC9A3   |

|      |          |
|------|----------|
| USF2 | SLF2     |
| USF2 | SMAD7    |
| USF2 | SMCHD1   |
| USF2 | SMDT1    |
| USF2 | SMIM14   |
| USF2 | SNRK     |
| USF2 | SNX2     |
| USF2 | SP100    |
| USF2 | SPACA9   |
| USF2 | SPG21    |
| USF2 | SPI1     |
| USF2 | SREBF2   |
| USF2 | SRPK2    |
| USF2 | SRSF5    |
| USF2 | SSBP3    |
| USF2 | STAG1    |
| USF2 | STAT3    |
| USF2 | STK16    |
| USF2 | STK17B   |
| USF2 | STK26    |
| USF2 | STRBP    |
| USF2 | STX12    |
| USF2 | STX7     |
| USF2 | STXBP3   |
| USF2 | SULF2    |
| USF2 | SUM03    |
| USF2 | SUN2     |
| USF2 | SUPT6H   |
| USF2 | SYMPK    |
| USF2 | SYNE1    |
| USF2 | SYT11    |
| USF2 | TAF10    |
| USF2 | TAX1BP1  |
| USF2 | TBL1XR1  |
| USF2 | TCEAL3   |
| USF2 | TCEAL4   |
| USF2 | TCEAL8   |
| USF2 | TCF25    |
| USF2 | TEN1     |
| USF2 | TEX264   |
| USF2 | TFPT     |
| USF2 | TGFBRAP1 |
| USF2 | TGOLN2   |
| USF2 | THOC3    |
| USF2 | TJP1     |
| USF2 | TM9SF2   |
| USF2 | TMBIM1   |
| USF2 | TMC6     |
| USF2 | TMC8     |
| USF2 | TMEM131  |

|      |           |
|------|-----------|
| USF2 | TMEM219   |
| USF2 | TMEM256   |
| USF2 | TMEM60    |
| USF2 | TMEM9B    |
| USF2 | TMSB4X    |
| USF2 | TMX4      |
| USF2 | TNFRSF13C |
| USF2 | TNFRSF14  |
| USF2 | TOLLIP    |
| USF2 | TOMM20    |
| USF2 | TOPORS    |
| USF2 | TPP1      |
| USF2 | TPT1      |
| USF2 | TRIB2     |
| USF2 | TRIM11    |
| USF2 | TRIP12    |
| USF2 | TSC22D3   |
| USF2 | TSEN2     |
| USF2 | TTC9      |
| USF2 | TUBA1A    |
| USF2 | TUBB2A    |
| USF2 | TUBB3     |
| USF2 | TWF2      |
| USF2 | TXN2      |
| USF2 | U2AF1     |
| USF2 | UBA52     |
| USF2 | UBE4A     |
| USF2 | UBN1      |
| USF2 | UBTF      |
| USF2 | UROD      |
| USF2 | USF2      |
| USF2 | USP11     |
| USF2 | USP44     |
| USF2 | USP8      |
| USF2 | VAPA      |
| USF2 | VASP      |
| USF2 | VAV1      |
| USF2 | VPS11     |
| USF2 | VPS35     |
| USF2 | WASF2     |
| USF2 | WDR13     |
| USF2 | WDR26     |
| USF2 | WIPF1     |
| USF2 | WIPI2     |
| USF2 | WWC3      |
| USF2 | XXYLT1    |
| USF2 | YPEL2     |
| USF2 | YWHAZ     |
| USF2 | ZBTB20    |
| USF2 | ZDHHC13   |

|       |          |
|-------|----------|
| USF2  | ZDHC17   |
| USF2  | ZDHC3    |
| USF2  | ZFAND6   |
| USF2  | ZFP62    |
| USF2  | ZFX      |
| USF2  | ZHX2     |
| USF2  | ZMAT3    |
| USF2  | ZMYM3    |
| USF2  | ZNF318   |
| USF2  | ZNF580   |
| USF2  | ZNF608   |
| USF2  | ZNF621   |
| USF2  | ZNF680   |
| USF2  | ZNF720   |
| USF2  | ZNF76    |
| USF2  | ZSWIM8   |
| VEZF1 | ARAP2    |
| VEZF1 | L3MBTL1  |
| VEZF1 | MARK2    |
| VEZF1 | PATZ1    |
| VEZF1 | PLEKHA1  |
| VEZF1 | RNF44    |
| VEZF1 | VEZF1    |
| XBP1  | AAAS     |
| XBP1  | AACS     |
| XBP1  | AAK1     |
| XBP1  | AAMP     |
| XBP1  | AARS     |
| XBP1  | AASDHPPT |
| XBP1  | ABCA5    |
| XBP1  | ABCB8    |
| XBP1  | ABCC4    |
| XBP1  | ABCF3    |
| XBP1  | ABL2     |
| XBP1  | ABTB1    |
| XBP1  | ACACB    |
| XBP1  | ACAD10   |
| XBP1  | ACADVL   |
| XBP1  | ACBD3    |
| XBP1  | ACBD4    |
| XBP1  | AC02     |
| XBP1  | AC0X1    |
| XBP1  | AC0X3    |
| XBP1  | ACSL3    |
| XBP1  | ACSL4    |
| XBP1  | ACSS1    |
| XBP1  | ACYP2    |
| XBP1  | ADA      |
| XBP1  | ADAM10   |
| XBP1  | ADAR     |



|      |            |
|------|------------|
| XBP1 | ADGRG5     |
| XBP1 | ADI1       |
| XBP1 | ADIPOR1    |
| XBP1 | ADM        |
| XBP1 | ADORA2A    |
| XBP1 | ADRM1      |
| XBP1 | AEBP1      |
| XBP1 | AFF1       |
| XBP1 | AGA        |
| XBP1 | AGAP5      |
| XBP1 | AG01       |
| XBP1 | AGPAT1     |
| XBP1 | AGPAT3     |
| XBP1 | AGTRAP     |
| XBP1 | AIFM2      |
| XBP1 | AIG1       |
| XBP1 | AK3        |
| XBP1 | AK9        |
| XBP1 | AKAP1      |
| XBP1 | AKAP13     |
| XBP1 | AKAP8L     |
| XBP1 | AKAP9      |
| XBP1 | AKIRIN1    |
| XBP1 | AKIRIN2    |
| XBP1 | AKR1A1     |
| XBP1 | AKT1S1     |
| XBP1 | ALDH18A1   |
| XBP1 | ALDH3A2    |
| XBP1 | ALDOA      |
| XBP1 | ALDOC      |
| XBP1 | ALG1       |
| XBP1 | ALG11      |
| XBP1 | ALG12      |
| XBP1 | ALG13      |
| XBP1 | ALG14      |
| XBP1 | ALG2       |
| XBP1 | ALG3       |
| XBP1 | ALG9       |
| XBP1 | ALKBH5     |
| XBP1 | ALKBH7     |
| XBP1 | ALOX12-AS1 |
| XBP1 | AMN        |
| XBP1 | AMOTL1     |
| XBP1 | AMPD2      |
| XBP1 | AMPD3      |
| XBP1 | ANAPC10    |
| XBP1 | ANAPC11    |
| XBP1 | ANAPC13    |
| XBP1 | ANAPC16    |
| XBP1 | ANAPC2     |

|      |          |
|------|----------|
| XBP1 | ANAPC5   |
| XBP1 | ANG      |
| XBP1 | ANKHD1   |
| XBP1 | ANKRD12  |
| XBP1 | ANKRD28  |
| XBP1 | ANKRD36  |
| XBP1 | ANKRD36B |
| XBP1 | ANKRD37  |
| XBP1 | ANKRD39  |
| XBP1 | ANKS3    |
| XBP1 | ANKZF1   |
| XBP1 | AN09     |
| XBP1 | ANXA11   |
| XBP1 | ANXA5    |
| XBP1 | ANXA6    |
| XBP1 | AP2A1    |
| XBP1 | AP3B1    |
| XBP1 | AP3D1    |
| XBP1 | APBB3    |
| XBP1 | APH1B    |
| XBP1 | APMAP    |
| XBP1 | APOL3    |
| XBP1 | APP      |
| XBP1 | APPBP2   |
| XBP1 | APTX     |
| XBP1 | AQP3     |
| XBP1 | ARCN1    |
| XBP1 | AREG     |
| XBP1 | ARF1     |
| XBP1 | ARF4     |
| XBP1 | ARFGAP1  |
| XBP1 | ARFGAP3  |
| XBP1 | ARFGEF2  |
| XBP1 | ARFIP1   |
| XBP1 | ARFIP2   |
| XBP1 | ARHGEF6  |
| XBP1 | ARID3A   |
| XBP1 | ARID3B   |
| XBP1 | ARID4A   |
| XBP1 | ARL1     |
| XBP1 | ARL5A    |
| XBP1 | ARMCX3   |
| XBP1 | ARMCX5   |
| XBP1 | ARRDC3   |
| XBP1 | ARSA     |
| XBP1 | ARV1     |
| XBP1 | ASB6     |
| XBP1 | ASB8     |
| XBP1 | ASCC2    |
| XBP1 | ASCC3    |

|      |           |
|------|-----------|
| XBP1 | ASNA1     |
| XBP1 | ASPHD2    |
| XBP1 | ATF4      |
| XBP1 | ATF5      |
| XBP1 | ATF6      |
| XBP1 | ATF6B     |
| XBP1 | ATG101    |
| XBP1 | ATG13     |
| XBP1 | ATG16L1   |
| XBP1 | ATG4C     |
| XBP1 | ATG5      |
| XBP1 | ATP13A1   |
| XBP1 | ATP1B1    |
| XBP1 | ATP2B4    |
| XBP1 | ATP6AP1   |
| XBP1 | ATP6AP2   |
| XBP1 | ATP6V0A1  |
| XBP1 | ATP6V0B   |
| XBP1 | ATP6V0D1  |
| XBP1 | ATP6V0E1  |
| XBP1 | ATP6V1D   |
| XBP1 | ATP6V1G1  |
| XBP1 | ATP8B2    |
| XBP1 | ATRAID    |
| XBP1 | ATRX      |
| XBP1 | AURKAIP1  |
| XBP1 | AZIN1     |
| XBP1 | B3GAT2    |
| XBP1 | B3GAT3    |
| XBP1 | B4GALT3   |
| XBP1 | B4GALT4   |
| XBP1 | B4GAT1    |
| XBP1 | B9D1      |
| XBP1 | BACH1     |
| XBP1 | BAIAP2L1  |
| XBP1 | BAZ2B     |
| XBP1 | BBX       |
| XBP1 | BCAP31    |
| XBP1 | BCAR1     |
| XBP1 | BCAR3     |
| XBP1 | BCAS3     |
| XBP1 | BCKDK     |
| XBP1 | BDH2      |
| XBP1 | BECN1     |
| XBP1 | BET1      |
| XBP1 | BET1L     |
| XBP1 | BEX4      |
| XBP1 | BEX5      |
| XBP1 | BFSP2-AS1 |
| XBP1 | BHLHE41   |

|      |           |
|------|-----------|
| XBP1 | BICD1     |
| XBP1 | BIRC2     |
| XBP1 | BLNK      |
| XBP1 | BLOC1S3   |
| XBP1 | BLVRB     |
| XBP1 | BLZF1     |
| XBP1 | BMI1      |
| XBP1 | BMT2      |
| XBP1 | BNIP3     |
| XBP1 | BOLA1     |
| XBP1 | BORCS5    |
| XBP1 | BORCS6    |
| XBP1 | BPGM      |
| XBP1 | BRD1      |
| XBP1 | BRD2      |
| XBP1 | BRI3      |
| XBP1 | BSDC1     |
| XBP1 | BSG       |
| XBP1 | BTBD7     |
| XBP1 | BTG2      |
| XBP1 | BTLA      |
| XBP1 | BUB3      |
| XBP1 | C11orf24  |
| XBP1 | C11orf68  |
| XBP1 | C11orf71  |
| XBP1 | C14orf28  |
| XBP1 | C15orf61  |
| XBP1 | C16orf58  |
| XBP1 | C16orf72  |
| XBP1 | C16orf91  |
| XBP1 | C16orf95  |
| XBP1 | C17orf53  |
| XBP1 | C18orf32  |
| XBP1 | C19orf12  |
| XBP1 | C19orf24  |
| XBP1 | C19orf53  |
| XBP1 | C19orf81  |
| XBP1 | C1GALT1   |
| XBP1 | C1GALT1C1 |
| XBP1 | C1orf43   |
| XBP1 | C21orf2   |
| XBP1 | C2orf74   |
| XBP1 | C2orf88   |
| XBP1 | C4orf3    |
| XBP1 | C4orf48   |
| XBP1 | C5orf15   |
| XBP1 | C6orf106  |
| XBP1 | C6orf52   |
| XBP1 | C6orf89   |
| XBP1 | C7orf50   |

|      |          |
|------|----------|
| XBP1 | CAAP1    |
| XBP1 | CACUL1   |
| XBP1 | CADM1    |
| XBP1 | CALCOC01 |
| XBP1 | CALCOC02 |
| XBP1 | CALR     |
| XBP1 | CALU     |
| XBP1 | CAMP     |
| XBP1 | CAMTA1   |
| XBP1 | CANX     |
| XBP1 | CAP1     |
| XBP1 | CAPN10   |
| XBP1 | CAPN7    |
| XBP1 | CASP3    |
| XBP1 | CASP4    |
| XBP1 | CASP7    |
| XBP1 | CASP8    |
| XBP1 | CASP9    |
| XBP1 | CBR1     |
| XBP1 | CBWD1    |
| XBP1 | CBWD5    |
| XBP1 | CBWD6    |
| XBP1 | CBX4     |
| XBP1 | CBX7     |
| XBP1 | CCDC107  |
| XBP1 | CCDC112  |
| XBP1 | CCDC130  |
| XBP1 | CCDC144A |
| XBP1 | CCDC167  |
| XBP1 | CCDC186  |
| XBP1 | CCDC47   |
| XBP1 | CCDC57   |
| XBP1 | CCDC66   |
| XBP1 | CCDC69   |
| XBP1 | CCDC88A  |
| XBP1 | CCDC88C  |
| XBP1 | CCL25    |
| XBP1 | CCM2     |
| XBP1 | CCNC     |
| XBP1 | CCNL1    |
| XBP1 | CCNT2    |
| XBP1 | CCPG1    |
| XBP1 | CCR10    |
| XBP1 | CCRL2    |
| XBP1 | CD164    |
| XBP1 | CD200    |
| XBP1 | CD2BP2   |
| XBP1 | CD38     |
| XBP1 | CD55     |
| XBP1 | CD59     |

|      |          |
|------|----------|
| XBP1 | CD63     |
| XBP1 | CD74     |
| XBP1 | CDADC1   |
| XBP1 | CDC16    |
| XBP1 | CDC26    |
| XBP1 | CDIP1    |
| XBP1 | CDIPT    |
| XBP1 | CDK12    |
| XBP1 | CDK14    |
| XBP1 | CDK2AP2  |
| XBP1 | CDK5     |
| XBP1 | CDK5RAP3 |
| XBP1 | CDK6     |
| XBP1 | CDKN1A   |
| XBP1 | CDKN1B   |
| XBP1 | CDR2     |
| XBP1 | CDV3     |
| XBP1 | CEBPB    |
| XBP1 | CEP120   |
| XBP1 | CEP128   |
| XBP1 | CEP63    |
| XBP1 | CEP70    |
| XBP1 | CERCAM   |
| XBP1 | CERS6    |
| XBP1 | CETN2    |
| XBP1 | CFL2     |
| XBP1 | CHAC1    |
| XBP1 | CHCHD2   |
| XBP1 | CHCHD7   |
| XBP1 | CHD6     |
| XBP1 | CHD9     |
| XBP1 | CHID1    |
| XBP1 | CHMP2A   |
| XBP1 | CHMP2B   |
| XBP1 | CHP1     |
| XBP1 | CHPF     |
| XBP1 | CHPF2    |
| XBP1 | CHRN1    |
| XBP1 | CHST11   |
| XBP1 | CHST12   |
| XBP1 | CHST7    |
| XBP1 | CISD2    |
| XBP1 | CITED2   |
| XBP1 | CKAP4    |
| XBP1 | CLCC1    |
| XBP1 | CLCN3    |
| XBP1 | CLCN4    |
| XBP1 | CLCN7    |
| XBP1 | CLIC4    |
| XBP1 | CLINT1   |

|      |         |
|------|---------|
| XBP1 | CLIP4   |
| XBP1 | CLK1    |
| XBP1 | CLN5    |
| XBP1 | CLOCK   |
| XBP1 | CLP1    |
| XBP1 | CLPB    |
| XBP1 | CLPTM1  |
| XBP1 | CLPTM1L |
| XBP1 | CLSTN3  |
| XBP1 | CMIP    |
| XBP1 | CNOT6L  |
| XBP1 | CNPY2   |
| XBP1 | CNR1    |
| XBP1 | COG3    |
| XBP1 | COG5    |
| XBP1 | COG6    |
| XBP1 | COMMD1  |
| XBP1 | COMMD3  |
| XBP1 | COMT    |
| XBP1 | COPA    |
| XBP1 | COPB1   |
| XBP1 | COPB2   |
| XBP1 | COPE    |
| XBP1 | COPG1   |
| XBP1 | COPS6   |
| XBP1 | COPS8   |
| XBP1 | COPS9   |
| XBP1 | COPZ1   |
| XBP1 | COPZ2   |
| XBP1 | COQ10B  |
| XBP1 | COQ4    |
| XBP1 | COQ6    |
| XBP1 | COR01C  |
| XBP1 | COX10   |
| XBP1 | COX18   |
| XBP1 | COX6C   |
| XBP1 | COX7A2L |
| XBP1 | CPEB4   |
| XBP1 | CR1     |
| XBP1 | CRB3    |
| XBP1 | CREB3   |
| XBP1 | CREB3L2 |
| XBP1 | CREBZF  |
| XBP1 | CRELD2  |
| XBP1 | CRIP1   |
| XBP1 | CRK     |
| XBP1 | CRLS1   |
| XBP1 | CRNKL1  |
| XBP1 | CSDE1   |
| XBP1 | CSF2RB  |

|      |            |
|------|------------|
| XBP1 | CSGALNACT2 |
| XBP1 | CSNK1A1    |
| XBP1 | CSNK1E     |
| XBP1 | CSRP1      |
| XBP1 | CSTB       |
| XBP1 | CTBP1      |
| XBP1 | CTBP1-AS   |
| XBP1 | CTC1       |
| XBP1 | CTDNEP1    |
| XBP1 | CTGF       |
| XBP1 | CTHRC1     |
| XBP1 | CTNNBIP1   |
| XBP1 | CTSA       |
| XBP1 | CTSB       |
| XBP1 | CTSD       |
| XBP1 | CUEDC2     |
| XBP1 | CUTA       |
| XBP1 | CWC25      |
| XBP1 | CYB561     |
| XBP1 | CYB561D2   |
| XBP1 | CYB5R1     |
| XBP1 | CYCS       |
| XBP1 | CYLD       |
| XBP1 | CYTH2      |
| XBP1 | CYTIP      |
| XBP1 | DAD1       |
| XBP1 | DAP        |
| XBP1 | DCAF11     |
| XBP1 | DCAF5      |
| XBP1 | DCAF8      |
| XBP1 | DCP1A      |
| XBP1 | DCPS       |
| XBP1 | DCTN4      |
| XBP1 | DCXR       |
| XBP1 | DDB1       |
| XBP1 | DDHD1      |
| XBP1 | DDIT4      |
| XBP1 | DDX1       |
| XBP1 | DDX17      |
| XBP1 | DDX20      |
| XBP1 | DDX23      |
| XBP1 | DDX3X      |
| XBP1 | DDX3Y      |
| XBP1 | DDX49      |
| XBP1 | DDX5       |
| XBP1 | DDX51      |
| XBP1 | DDX59      |
| XBP1 | DECR1      |
| XBP1 | DEDD2      |
| XBP1 | DEF6       |



|      |         |
|------|---------|
| XBP1 | DENND1B |
| XBP1 | DENND1C |
| XBP1 | DENND6B |
| XBP1 | DERL1   |
| XBP1 | DERL3   |
| XBP1 | DEXI    |
| XBP1 | DHCR7   |
| XBP1 | DHDDS   |
| XBP1 | DHPS    |
| XBP1 | DHRS4L2 |
| XBP1 | DHRS7   |
| XBP1 | DHX37   |
| XBP1 | DLAT    |
| XBP1 | DNAJB1  |
| XBP1 | DNAJB11 |
| XBP1 | DNAJB12 |
| XBP1 | DNAJB9  |
| XBP1 | DNAJC1  |
| XBP1 | DNAJC10 |
| XBP1 | DNAJC12 |
| XBP1 | DNAJC16 |
| XBP1 | DNAJC25 |
| XBP1 | DNAJC3  |
| XBP1 | DNAJC30 |
| XBP1 | DNAJC4  |
| XBP1 | DNASE2  |
| XBP1 | DPAGT1  |
| XBP1 | DPM1    |
| XBP1 | DPM2    |
| XBP1 | DPM3    |
| XBP1 | DPP7    |
| XBP1 | DRAP1   |
| XBP1 | DSTN    |
| XBP1 | DUSP1   |
| XBP1 | DUSP12  |
| XBP1 | DUSP22  |
| XBP1 | DUSP5   |
| XBP1 | DVL3    |
| XBP1 | DYNLL1  |
| XBP1 | DYRK4   |
| XBP1 | E2F5    |
| XBP1 | E4F1    |
| XBP1 | EAF2    |
| XBP1 | EBAG9   |
| XBP1 | EBPL    |
| XBP1 | EDEM1   |
| XBP1 | EDEM2   |
| XBP1 | EDEM3   |
| XBP1 | EDRF1   |
| XBP1 | EEF2    |

|      |           |
|------|-----------|
| XBP1 | EFHC1     |
| XBP1 | EGR1      |
| XBP1 | EHD3      |
| XBP1 | EHMT1     |
| XBP1 | EIF1      |
| XBP1 | EIF1AD    |
| XBP1 | EIF2A     |
| XBP1 | EIF2AK2   |
| XBP1 | EIF2AK3   |
| XBP1 | EIF2AK4   |
| XBP1 | EIF3G     |
| XBP1 | EIF4E3    |
| XBP1 | EIF4ENIF1 |
| XBP1 | EIF4G1    |
| XBP1 | EIF5      |
| XBP1 | ELAC2     |
| XBP1 | ELK1      |
| XBP1 | ELK3      |
| XBP1 | ELL       |
| XBP1 | ELL2      |
| XBP1 | ELMOD2    |
| XBP1 | ELP3      |
| XBP1 | EMC10     |
| XBP1 | EMC2      |
| XBP1 | EMC3      |
| XBP1 | EMC4      |
| XBP1 | EMC7      |
| XBP1 | EML6      |
| XBP1 | ENAM      |
| XBP1 | ENDOG     |
| XBP1 | ENTPD7    |
| XBP1 | EPHX1     |
| XBP1 | EPOR      |
| XBP1 | EPRS      |
| XBP1 | ERC1      |
| XBP1 | ERCC1     |
| XBP1 | ERCC4     |
| XBP1 | ERCC8     |
| XBP1 | ERGIC1    |
| XBP1 | ERGIC2    |
| XBP1 | ERGIC3    |
| XBP1 | ERLEC1    |
| XBP1 | ERN1      |
| XBP1 | ER01A     |
| XBP1 | ER01B     |
| XBP1 | ERP29     |
| XBP1 | ERP44     |
| XBP1 | ESC01     |
| XBP1 | ESR2      |
| XBP1 | ETNK1     |

|      |           |
|------|-----------|
| XBP1 | ETS1      |
| XBP1 | ETV2      |
| XBP1 | EVI2A     |
| XBP1 | EVI2B     |
| XBP1 | EXD2      |
| XBP1 | EXOC5     |
| XBP1 | EXOSC1    |
| XBP1 | EXTL2     |
| XBP1 | FADD      |
| XBP1 | FAF1      |
| XBP1 | FAM114A1  |
| XBP1 | FAM117A   |
| XBP1 | FAM120A0S |
| XBP1 | FAM174A   |
| XBP1 | FAM177A1  |
| XBP1 | FAM199X   |
| XBP1 | FAM214A   |
| XBP1 | FAM3A     |
| XBP1 | FAM3C     |
| XBP1 | FAM50A    |
| XBP1 | FAM53C    |
| XBP1 | FAM78A    |
| XBP1 | FAM91A1   |
| XBP1 | FAM98A    |
| XBP1 | FAR1      |
| XBP1 | FASTK     |
| XBP1 | FAU       |
| XBP1 | FBXL15    |
| XBP1 | FBX011    |
| XBP1 | FBX016    |
| XBP1 | FBX025    |
| XBP1 | FBX03     |
| XBP1 | FBX034    |
| XBP1 | FBX04     |
| XBP1 | FBX042    |
| XBP1 | FBX046    |
| XBP1 | FBX08     |
| XBP1 | FBXW5     |
| XBP1 | FBXW7     |
| XBP1 | FDX1      |
| XBP1 | FECH      |
| XBP1 | FEM1C     |
| XBP1 | FGFR10P2  |
| XBP1 | FIS1      |
| XBP1 | FKBP11    |
| XBP1 | FKBP14    |
| XBP1 | FKBP2     |
| XBP1 | FKBP8     |
| XBP1 | FKBPL     |
| XBP1 | FLYWCH2   |

|      |           |
|------|-----------|
| XBP1 | FMNL2     |
| XBP1 | FN3KRP    |
| XBP1 | FNDC3A    |
| XBP1 | FNDC3B    |
| XBP1 | FOS       |
| XBP1 | FOSB      |
| XBP1 | FOSL1     |
| XBP1 | FOXN3     |
| XBP1 | FOXO3     |
| XBP1 | FPGS      |
| XBP1 | FRZB      |
| XBP1 | FTH1      |
| XBP1 | FTL       |
| XBP1 | FUBP3     |
| XBP1 | FUCA2     |
| XBP1 | FUT8      |
| XBP1 | FZD3      |
| XBP1 | FZD6      |
| XBP1 | G6PC3     |
| XBP1 | GABARAP   |
| XBP1 | GABARAPL1 |
| XBP1 | GABARAPL2 |
| XBP1 | GADD45A   |
| XBP1 | GADD45B   |
| XBP1 | GADD45G   |
| XBP1 | GAK       |
| XBP1 | GALC      |
| XBP1 | GALK2     |
| XBP1 | GALNT2    |
| XBP1 | GANAB     |
| XBP1 | GAS6      |
| XBP1 | GCC1      |
| XBP1 | GDI1      |
| XBP1 | GEMIN7    |
| XBP1 | GFER      |
| XBP1 | GFPT1     |
| XBP1 | GGCX      |
| XBP1 | GGH       |
| XBP1 | GHITM     |
| XBP1 | GIGYF2    |
| XBP1 | GLCCI1    |
| XBP1 | GLG1      |
| XBP1 | GLIPR1    |
| XBP1 | GLMP      |
| XBP1 | GLRX      |
| XBP1 | GLS       |
| XBP1 | GLT8D1    |
| XBP1 | GMCL1     |
| XBP1 | GMFG      |
| XBP1 | GMPPA     |

|      |         |
|------|---------|
| XBP1 | GMPPB   |
| XBP1 | GNAS    |
| XBP1 | GNB3    |
| XBP1 | GNG7    |
| XBP1 | GNPTG   |
| XBP1 | GOLGA2  |
| XBP1 | GOLGA3  |
| XBP1 | GOLGA4  |
| XBP1 | GOLGA5  |
| XBP1 | GOLGB1  |
| XBP1 | GOLIM4  |
| XBP1 | GOLPH3  |
| XBP1 | GOLPH3L |
| XBP1 | GOLT1B  |
| XBP1 | GON4L   |
| XBP1 | GORASP2 |
| XBP1 | GOSR1   |
| XBP1 | GOSR2   |
| XBP1 | GPANK1  |
| XBP1 | GPOR1   |
| XBP1 | GPKOW   |
| XBP1 | GPLD1   |
| XBP1 | GPM6B   |
| XBP1 | GPR108  |
| XBP1 | GPR137B |
| XBP1 | GPR155  |
| XBP1 | GPR160  |
| XBP1 | GPR180  |
| XBP1 | GPR183  |
| XBP1 | GPR65   |
| XBP1 | GPR89B  |
| XBP1 | GPRIN3  |
| XBP1 | GPX7    |
| XBP1 | GRB2    |
| XBP1 | GRINA   |
| XBP1 | GRK5    |
| XBP1 | GRK6    |
| XBP1 | GRN     |
| XBP1 | GSK3B   |
| XBP1 | GSTM3   |
| XBP1 | GTF2A1  |
| XBP1 | GTF2B   |
| XBP1 | GTF3A   |
| XBP1 | GUK1    |
| XBP1 | GUSB    |
| XBP1 | GYPE    |
| XBP1 | H1FX    |
| XBP1 | H3F3B   |
| XBP1 | HABP4   |
| XBP1 | HAGH    |

|      |           |
|------|-----------|
| XBP1 | HARBI1    |
| XBP1 | HAX1      |
| XBP1 | HBP1      |
| XBP1 | HBS1L     |
| XBP1 | HCCS      |
| XBP1 | HCFC2     |
| XBP1 | HCST      |
| XBP1 | HDLBP     |
| XBP1 | HECW2     |
| XBP1 | HELZ2     |
| XBP1 | HERPUD1   |
| XBP1 | HES1      |
| XBP1 | HEXA      |
| XBP1 | HEXB      |
| XBP1 | HIBCH     |
| XBP1 | HIST1H1C  |
| XBP1 | HIST1H2AE |
| XBP1 | HIST1H2BD |
| XBP1 | HIST1H2BG |
| XBP1 | HIST1H2BJ |
| XBP1 | HIST1H2BN |
| XBP1 | HLA-A     |
| XBP1 | HLA-B     |
| XBP1 | HLA-DMA   |
| XBP1 | HLA-DPA1  |
| XBP1 | HLA-DQA1  |
| XBP1 | HLA-DQA2  |
| XBP1 | HLA-DQB1  |
| XBP1 | HLA-DRB5  |
| XBP1 | HLA-E     |
| XBP1 | HLA-F     |
| XBP1 | HM13      |
| XBP1 | HMB0X1    |
| XBP1 | HMGN4     |
| XBP1 | HMGXB3    |
| XBP1 | HMOX2     |
| XBP1 | HNRNPH2   |
| XBP1 | H00K2     |
| XBP1 | HOTAIRM1  |
| XBP1 | H0XB2     |
| XBP1 | H0XB7     |
| XBP1 | HSCB      |
| XBP1 | HSD17B10  |
| XBP1 | HSP90B1   |
| XBP1 | HSPA13    |
| XBP1 | HSPA1A    |
| XBP1 | HSPA5     |
| XBP1 | HTR3A     |
| XBP1 | HYOU1     |
| XBP1 | IBTK      |

|      |          |
|------|----------|
| XBP1 | ICAM1    |
| XBP1 | ICAM2    |
| XBP1 | ICAM3    |
| XBP1 | IDH1     |
| XBP1 | IDH2     |
| XBP1 | IDH3G    |
| XBP1 | IDUA     |
| XBP1 | IER2     |
| XBP1 | IER3IP1  |
| XBP1 | IFI27L2  |
| XBP1 | IFNAR1   |
| XBP1 | IFNAR2   |
| XBP1 | IFNG-AS1 |
| XBP1 | IFNLR1   |
| XBP1 | IFRD1    |
| XBP1 | IFT20    |
| XBP1 | IFT27    |
| XBP1 | IGLL5    |
| XBP1 | IGSF8    |
| XBP1 | IKBIP    |
| XBP1 | IL10RA   |
| XBP1 | IL12RB1  |
| XBP1 | IL16     |
| XBP1 | IL6      |
| XBP1 | IL6R     |
| XBP1 | IL6ST    |
| XBP1 | IMP3     |
| XBP1 | IMPAD1   |
| XBP1 | ING2     |
| XBP1 | INPP4A   |
| XBP1 | INSIG1   |
| XBP1 | INSIG2   |
| XBP1 | INTS6    |
| XBP1 | INTS7    |
| XBP1 | IQGAP2   |
| XBP1 | IQSEC1   |
| XBP1 | IRAK1    |
| XBP1 | IRF1     |
| XBP1 | IRF2     |
| XBP1 | IRF2BP1  |
| XBP1 | IRF4     |
| XBP1 | IRF7     |
| XBP1 | IRF9     |
| XBP1 | IRS1     |
| XBP1 | ISCU     |
| XBP1 | ISG15    |
| XBP1 | ISG20    |
| XBP1 | ISOC2    |
| XBP1 | ITCH     |
| XBP1 | ITFG2    |

|      |           |
|------|-----------|
| XBP1 | ITGB2     |
| XBP1 | ITM2B     |
| XBP1 | ITM2C     |
| XBP1 | ITPR2     |
| XBP1 | ITPR3     |
| XBP1 | ITPRIPL2  |
| XBP1 | JAGN1     |
| XBP1 | JCHAIN    |
| XBP1 | JDP2      |
| XBP1 | JMJD6     |
| XBP1 | JMJD8     |
| XBP1 | JMY       |
| XBP1 | JOSD2     |
| XBP1 | JUN       |
| XBP1 | JUNB      |
| XBP1 | KBTBD2    |
| XBP1 | KCNA3     |
| XBP1 | KCNK12    |
| XBP1 | KCNK6     |
| XBP1 | KCNMA1    |
| XBP1 | KCNN3     |
| XBP1 | KCNN4     |
| XBP1 | KDELR1    |
| XBP1 | KDELR2    |
| XBP1 | KDM5A     |
| XBP1 | KDM5C     |
| XBP1 | KHK       |
| XBP1 | KIAA0232  |
| XBP1 | KIAA2013  |
| XBP1 | KIAA2026  |
| XBP1 | KIF5C     |
| XBP1 | KIFAP3    |
| XBP1 | KIZ       |
| XBP1 | KLF13     |
| XBP1 | KLF6      |
| XBP1 | KLHDC10   |
| XBP1 | KLHDC2    |
| XBP1 | KLHDC7B   |
| XBP1 | KLHL14    |
| XBP1 | KLHL28    |
| XBP1 | KMT2E     |
| XBP1 | KMT2E-AS1 |
| XBP1 | KMT5B     |
| XBP1 | KRT18     |
| XBP1 | KRTCAP2   |
| XBP1 | KTI12     |
| XBP1 | L3MBTL2   |
| XBP1 | LAMTOR4   |
| XBP1 | LAP3      |
| XBP1 | LAPTM4A   |



|      |           |
|------|-----------|
| XBP1 | LARP1B    |
| XBP1 | LAX1      |
| XBP1 | LBH       |
| XBP1 | LDLR      |
| XBP1 | LDLRAD4   |
| XBP1 | LDLRAP1   |
| XBP1 | LEPROTL1  |
| XBP1 | LETM1     |
| XBP1 | LGALS1    |
| XBP1 | LIG3      |
| XBP1 | LIMD1     |
| XBP1 | LIN52     |
| XBP1 | LIN54     |
| XBP1 | LINC00501 |
| XBP1 | LINC01013 |
| XBP1 | LMAN1     |
| XBP1 | LMBR1     |
| XBP1 | LMBRD1    |
| XBP1 | LMF1      |
| XBP1 | LMF2      |
| XBP1 | LM04      |
| XBP1 | LMTK2     |
| XBP1 | LNX1      |
| XBP1 | LPIN1     |
| XBP1 | LRIG1     |
| XBP1 | LRIG2     |
| XBP1 | LRP10     |
| XBP1 | LRRC14    |
| XBP1 | LRRC2     |
| XBP1 | LRRC59    |
| XBP1 | LSP1      |
| XBP1 | LSR       |
| XBP1 | LST1      |
| XBP1 | LTB4R     |
| XBP1 | LTBP1     |
| XBP1 | LTBP3     |
| XBP1 | LTC4S     |
| XBP1 | LTN1      |
| XBP1 | LUZP1     |
| XBP1 | LY6E      |
| XBP1 | LY6G5C    |
| XBP1 | LYSMD3    |
| XBP1 | LZTFL1    |
| XBP1 | MAEA      |
| XBP1 | MAGED1    |
| XBP1 | MAGED2    |
| XBP1 | MAGOHB    |
| XBP1 | MAGT1     |
| XBP1 | MAN1A1    |
| XBP1 | MAN1A2    |

|      |              |
|------|--------------|
| XBP1 | MAN2A1       |
| XBP1 | MAN2C1       |
| XBP1 | MANBAL       |
| XBP1 | MANF         |
| XBP1 | MAP1LC3B     |
| XBP1 | MAP2K2       |
| XBP1 | MAP3K13      |
| XBP1 | MAP4K5       |
| XBP1 | MAP7D1       |
| XBP1 | MAP9         |
| XBP1 | MAPK6        |
| XBP1 | MAPK8        |
| XBP1 | MAPKAPK2     |
| XBP1 | MAPKAPK5-AS1 |
| XBP1 | MAPRE1       |
| XBP1 | MARCH3       |
| XBP1 | MARCH5       |
| XBP1 | MARCH6       |
| XBP1 | MARCH8       |
| XBP1 | MAX          |
| XBP1 | MBNL2        |
| XBP1 | MBTPS1       |
| XBP1 | MCEE         |
| XBP1 | MCFD2        |
| XBP1 | MCL1         |
| XBP1 | MCOLN1       |
| XBP1 | MDM2         |
| XBP1 | MDP1         |
| XBP1 | MECR         |
| XBP1 | MED18        |
| XBP1 | MEF2C        |
| XBP1 | MELK         |
| XBP1 | MESP1        |
| XBP1 | METTTL15     |
| XBP1 | MFF          |
| XBP1 | MFN2         |
| XBP1 | MFSD1        |
| XBP1 | MFSD5        |
| XBP1 | MGAT1        |
| XBP1 | MGAT4A       |
| XBP1 | MIA2         |
| XBP1 | MIA3         |
| XBP1 | MIAT         |
| XBP1 | MIB2         |
| XBP1 | MIEF1        |
| XBP1 | MIF          |
| XBP1 | MIR193BHG    |
| XBP1 | MIR22HG      |
| XBP1 | MIR3142HG    |
| XBP1 | MIR4435-2HG  |

|      |           |
|------|-----------|
| XBP1 | MIS12     |
| XBP1 | MKKS      |
| XBP1 | MKRN2     |
| XBP1 | MLEC      |
| XBP1 | MLF2      |
| XBP1 | MLX       |
| XBP1 | MMP25-AS1 |
| XBP1 | MOAP1     |
| XBP1 | MOB3C     |
| XBP1 | MOGS      |
| XBP1 | MON2      |
| XBP1 | MORC2     |
| XBP1 | MORF4L2   |
| XBP1 | MOSPD1    |
| XBP1 | MOSPD2    |
| XBP1 | MOSPD3    |
| XBP1 | MPC1      |
| XBP1 | MPEG1     |
| XBP1 | MPG       |
| XBP1 | MPH0SPH8  |
| XBP1 | MPI       |
| XBP1 | MPP5      |
| XBP1 | MPV17     |
| XBP1 | MPV17L2   |
| XBP1 | MRPL2     |
| XBP1 | MRPL23    |
| XBP1 | MRPL36    |
| XBP1 | MRPL40    |
| XBP1 | MRPL48    |
| XBP1 | MRPL52    |
| XBP1 | MRPL54    |
| XBP1 | MRPL55    |
| XBP1 | MRPL57    |
| XBP1 | MRPS18A   |
| XBP1 | MRPS31    |
| XBP1 | MRPS33    |
| XBP1 | MSI2      |
| XBP1 | MSL3      |
| XBP1 | MSM01     |
| XBP1 | MSN       |
| XBP1 | MSRA      |
| XBP1 | MST01     |
| XBP1 | MTDH      |
| XBP1 | MTG1      |
| XBP1 | MTIF3     |
| XBP1 | MTRF1L    |
| XBP1 | MUL1      |
| XBP1 | MUT       |
| XBP1 | MVB12A    |
| XBP1 | MVD       |

|      |          |
|------|----------|
| XBP1 | MVP      |
| XBP1 | MXD4     |
| XBP1 | MYCBP2   |
| XBP1 | MYDGF    |
| XBP1 | MYL4     |
| XBP1 | MYL6     |
| XBP1 | MYO1D    |
| XBP1 | MYO1G    |
| XBP1 | MZB1     |
| XBP1 | MZF1     |
| XBP1 | N4BP1    |
| XBP1 | N4BP2L2  |
| XBP1 | NAA38    |
| XBP1 | NADK     |
| XBP1 | NAGK     |
| XBP1 | NANS     |
| XBP1 | NAP1L4   |
| XBP1 | NAPA     |
| XBP1 | NAPA-AS1 |
| XBP1 | NARF     |
| XBP1 | NAT1     |
| XBP1 | NBAS     |
| XBP1 | NCALD    |
| XBP1 | NCK1     |
| XBP1 | NCK2     |
| XBP1 | NCLN     |
| XBP1 | NCOR2    |
| XBP1 | NDEL1    |
| XBP1 | NDFIP1   |
| XBP1 | NDFIP2   |
| XBP1 | NDUFA1   |
| XBP1 | NDUFA11  |
| XBP1 | NDUFA13  |
| XBP1 | NDUFA4   |
| XBP1 | NDUFA8   |
| XBP1 | NDUFAB1  |
| XBP1 | NDUFAF3  |
| XBP1 | NDUFAF6  |
| XBP1 | NDUFB1   |
| XBP1 | NDUFB2   |
| XBP1 | NDUFB4   |
| XBP1 | NDUFB6   |
| XBP1 | NDUFC1   |
| XBP1 | NDUFS1   |
| XBP1 | NDUFS2   |
| XBP1 | NDUFS5   |
| XBP1 | NDUFS6   |
| XBP1 | NDUFS8   |
| XBP1 | NDUFV1   |
| XBP1 | NDUFV3   |

|      |            |
|------|------------|
| XBP1 | NEAT1      |
| XBP1 | NECAP1     |
| XBP1 | NEDD9      |
| XBP1 | NET1       |
| XBP1 | NETO2      |
| XBP1 | NEU1       |
| XBP1 | NFU1       |
| XBP1 | NGLY1      |
| XBP1 | NGRN       |
| XBP1 | NHLRC3     |
| XBP1 | NKIRAS1    |
| XBP1 | NKIRAS2    |
| XBP1 | NKTR       |
| XBP1 | NKX6-3     |
| XBP1 | NMD3       |
| XBP1 | NMRK1      |
| XBP1 | NOL6       |
| XBP1 | NOL7       |
| XBP1 | NOP10      |
| XBP1 | NORAD      |
| XBP1 | NOSIP      |
| XBP1 | NPIP11     |
| XBP1 | NPRL2      |
| XBP1 | NR1H2      |
| XBP1 | NR2F6      |
| XBP1 | NRBF2      |
| XBP1 | NRBP1      |
| XBP1 | NRDC       |
| XBP1 | NSD1       |
| XBP1 | NSG1       |
| XBP1 | NSMCE3     |
| XBP1 | NSRP1      |
| XBP1 | NSUN4      |
| XBP1 | NT5C3A     |
| XBP1 | NT5DC2     |
| XBP1 | NUCB2      |
| XBP1 | NUDCD3     |
| XBP1 | NUDT18     |
| XBP1 | NUDT6      |
| XBP1 | NUDT9      |
| XBP1 | NUMB       |
| XBP1 | NUS1       |
| XBP1 | NUTM2B-AS1 |
| XBP1 | OAF        |
| XBP1 | OAZ1       |
| XBP1 | OCIAD1     |
| XBP1 | ODF3B      |
| XBP1 | OGFOD2     |
| XBP1 | ORAI3      |
| XBP1 | ORMDL1     |

|      |            |
|------|------------|
| XBP1 | ORMDL2     |
| XBP1 | ORMDL3     |
| XBP1 | OS9        |
| XBP1 | OSBP       |
| XBP1 | OSBPL2     |
| XBP1 | OSBPL3     |
| XBP1 | OST4       |
| XBP1 | OSTC       |
| XBP1 | OSTM1      |
| XBP1 | OTUD1      |
| XBP1 | OTUD4      |
| XBP1 | OTUD5      |
| XBP1 | OTUD6B-AS1 |
| XBP1 | OXA1L      |
| XBP1 | OXR1       |
| XBP1 | P2RX1      |
| XBP1 | P4HA1      |
| XBP1 | P4HB       |
| XBP1 | P4HTM      |
| XBP1 | PAAF1      |
| XBP1 | PAC SIN2   |
| XBP1 | PAFAH2     |
| XBP1 | PAIP2B     |
| XBP1 | PAN2       |
| XBP1 | PANK3      |
| XBP1 | PAPOLA     |
| XBP1 | PAPSS1     |
| XBP1 | PARD6A     |
| XBP1 | PARM1      |
| XBP1 | PARP1      |
| XBP1 | PARP2      |
| XBP1 | PARVG      |
| XBP1 | PBXIP1     |
| XBP1 | PCBP1      |
| XBP1 | PCED1B     |
| XBP1 | PCF11      |
| XBP1 | PCY0X1     |
| XBP1 | PDE12      |
| XBP1 | PDE4B      |
| XBP1 | PDE4DIP    |
| XBP1 | PDHB       |
| XBP1 | PDIA3      |
| XBP1 | PDIA4      |
| XBP1 | PDIA5      |
| XBP1 | PDIA6      |
| XBP1 | PDK1       |
| XBP1 | PDK2       |
| XBP1 | PDXDC1     |
| XBP1 | PDXK       |
| XBP1 | PEBP1      |

|      |            |
|------|------------|
| XBP1 | PECAM1     |
| XBP1 | PELO       |
| XBP1 | PEMT       |
| XBP1 | PET100     |
| XBP1 | PET117     |
| XBP1 | PEX2       |
| XBP1 | PEX26      |
| XBP1 | PGBD2      |
| XBP1 | PGK1       |
| XBP1 | PGM1       |
| XBP1 | PGM3       |
| XBP1 | PHACTR1    |
| XBP1 | PHF1       |
| XBP1 | PHF19      |
| XBP1 | PHF20L1    |
| XBP1 | PHPT1      |
| XBP1 | PI4K2A     |
| XBP1 | PIAS3      |
| XBP1 | PIGP       |
| XBP1 | PIK3CD-AS2 |
| XBP1 | PIK3CG     |
| XBP1 | PIM2       |
| XBP1 | PINK1      |
| XBP1 | PITPNA     |
| XBP1 | PITRM1     |
| XBP1 | PJA1       |
| XBP1 | PJA2       |
| XBP1 | PKIB       |
| XBP1 | PLBD2      |
| XBP1 | PLCL2      |
| XBP1 | PLD3       |
| XBP1 | PLD4       |
| XBP1 | PLEKHB1    |
| XBP1 | PLIN2      |
| XBP1 | PLOD3      |
| XBP1 | PLPP5      |
| XBP1 | PLTP       |
| XBP1 | PMEPA1     |
| XBP1 | PNISR      |
| XBP1 | PNKP       |
| XBP1 | PNOC       |
| XBP1 | PNPLA2     |
| XBP1 | PNPLA4     |
| XBP1 | PNPLA8     |
| XBP1 | PNRC1      |
| XBP1 | PODXL2     |
| XBP1 | POLK       |
| XBP1 | POLR2K     |
| XBP1 | POLR3D     |
| XBP1 | POMC       |

|      |           |
|------|-----------|
| XBP1 | PON2      |
| XBP1 | POP5      |
| XBP1 | POU2AF1   |
| XBP1 | POU2F1    |
| XBP1 | PPARA     |
| XBP1 | PPHLN1    |
| XBP1 | PPIB      |
| XBP1 | PPIP5K2   |
| XBP1 | PPM1F     |
| XBP1 | PPM1K     |
| XBP1 | PPP1R10   |
| XBP1 | PPP1R13B  |
| XBP1 | PPP1R15B  |
| XBP1 | PPP1R2    |
| XBP1 | PPP2R5B   |
| XBP1 | PPP2R5C   |
| XBP1 | PQBP1     |
| XBP1 | PQLC1     |
| XBP1 | PQLC3     |
| XBP1 | PRADC1    |
| XBP1 | PRCC      |
| XBP1 | PRCP      |
| XBP1 | PRDM1     |
| XBP1 | PRDX1     |
| XBP1 | PRDX2     |
| XBP1 | PRDX4     |
| XBP1 | PREB      |
| XBP1 | PRKAG1    |
| XBP1 | PRKCSH    |
| XBP1 | PRKD2     |
| XBP1 | PRKD3     |
| XBP1 | PRKRIP1   |
| XBP1 | PRPS1     |
| XBP1 | PRR5      |
| XBP1 | PRRC1     |
| XBP1 | PSEN2     |
| XBP1 | PSMA3     |
| XBP1 | PSMA5     |
| XBP1 | PSMB1     |
| XBP1 | PSMB10    |
| XBP1 | PSMB2     |
| XBP1 | PSMB4     |
| XBP1 | PSMB5     |
| XBP1 | PSMB8-AS1 |
| XBP1 | PSMD7     |
| XBP1 | PSMF1     |
| XBP1 | PTK2B     |
| XBP1 | PTP4A2    |
| XBP1 | PTP4A3    |
| XBP1 | PTPN1     |



|      |           |
|------|-----------|
| XBP1 | PTPN2     |
| XBP1 | PTPN22    |
| XBP1 | PTPN23    |
| XBP1 | PTPN7     |
| XBP1 | PTPRN2    |
| XBP1 | PTS       |
| XBP1 | PUM1      |
| XBP1 | PURB      |
| XBP1 | PUS7L     |
| XBP1 | PUSL1     |
| XBP1 | PXMP4     |
| XBP1 | PYGB      |
| XBP1 | QKI       |
| XBP1 | QPCT      |
| XBP1 | QPCTL     |
| XBP1 | QPRT      |
| XBP1 | QRICH1    |
| XBP1 | QS0X1     |
| XBP1 | QTRT1     |
| XBP1 | R3HDM1    |
| XBP1 | RAB11B    |
| XBP1 | RAB11FIP2 |
| XBP1 | RAB18     |
| XBP1 | RAB1A     |
| XBP1 | RAB24     |
| XBP1 | RAB2A     |
| XBP1 | RAB30     |
| XBP1 | RAB39B    |
| XBP1 | RAB5A     |
| XBP1 | RAB6A     |
| XBP1 | RAB8A     |
| XBP1 | RABAC1    |
| XBP1 | RALGPS1   |
| XBP1 | RALGPS2   |
| XBP1 | RAP1A     |
| XBP1 | RARS2     |
| XBP1 | RASAL3    |
| XBP1 | RASSF5    |
| XBP1 | RBBP6     |
| XBP1 | RBFA      |
| XBP1 | RBM15B    |
| XBP1 | RBM18     |
| XBP1 | RBM19     |
| XBP1 | RBM26     |
| XBP1 | RBM33     |
| XBP1 | RBM39     |
| XBP1 | RBM41     |
| XBP1 | RCE1      |
| XBP1 | RCN2      |
| XBP1 | REEP3     |

|      |          |
|------|----------|
| XBP1 | REEP5    |
| XBP1 | RELT     |
| XBP1 | REPIN1   |
| XBP1 | RER1     |
| XBP1 | REX02    |
| XBP1 | RGS1     |
| XBP1 | RGS13    |
| XBP1 | RGS14    |
| XBP1 | RGS16    |
| XBP1 | RGS2     |
| XBP1 | RHBDD1   |
| XBP1 | RIDA     |
| XBP1 | RIOK2    |
| XBP1 | RIPK1    |
| XBP1 | RNASEH1  |
| XBP1 | RNF10    |
| XBP1 | RNF103   |
| XBP1 | RNF113A  |
| XBP1 | RNF13    |
| XBP1 | RNF14    |
| XBP1 | RNF149   |
| XBP1 | RNF166   |
| XBP1 | RNF168   |
| XBP1 | RNF181   |
| XBP1 | RNF185   |
| XBP1 | RNF219   |
| XBP1 | RNF7     |
| XBP1 | RNGTT    |
| XBP1 | RNH1     |
| XBP1 | RPL10    |
| XBP1 | RPL36AL  |
| XBP1 | RPN1     |
| XBP1 | RPN2     |
| XBP1 | RPP25    |
| XBP1 | RPRD2    |
| XBP1 | RPS11    |
| XBP1 | RPS19BP1 |
| XBP1 | RPS6KB2  |
| XBP1 | RPUSD2   |
| XBP1 | RRAGD    |
| XBP1 | RRAS     |
| XBP1 | RRBP1    |
| XBP1 | RREB1    |
| XBP1 | RRNAD1   |
| XBP1 | RSAD1    |
| XBP1 | RSRP1    |
| XBP1 | RTKN     |
| XBP1 | RTN3     |
| XBP1 | RUNDC1   |
| XBP1 | RUNX1    |

|      |           |
|------|-----------|
| XBP1 | RWDD1     |
| XBP1 | RYBP      |
| XBP1 | S100A11   |
| XBP1 | S100A13   |
| XBP1 | SAMD8     |
| XBP1 | SAP18     |
| XBP1 | SAP30     |
| XBP1 | SAP30BP   |
| XBP1 | SAR1A     |
| XBP1 | SAR1B     |
| XBP1 | SARAF     |
| XBP1 | SASH3     |
| XBP1 | SAT1      |
| XBP1 | SBDS      |
| XBP1 | SCAF1     |
| XBP1 | SCAMP1    |
| XBP1 | SCAMP2    |
| XBP1 | SCAMP3    |
| XBP1 | SCAND1    |
| XBP1 | SCAP      |
| XBP1 | SCARB2    |
| XBP1 | SCFD1     |
| XBP1 | SCPEP1    |
| XBP1 | SCRN2     |
| XBP1 | SCYL1     |
| XBP1 | SDC1      |
| XBP1 | SDCBP2    |
| XBP1 | SDCCAG8   |
| XBP1 | SDF2L1    |
| XBP1 | SDF4      |
| XBP1 | SDHB      |
| XBP1 | SDHC      |
| XBP1 | SEC11C    |
| XBP1 | SEC13     |
| XBP1 | SEC14L1   |
| XBP1 | SEC16A    |
| XBP1 | SEC22B    |
| XBP1 | SEC23A    |
| XBP1 | SEC23B    |
| XBP1 | SEC23IP   |
| XBP1 | SEC24A    |
| XBP1 | SEC24D    |
| XBP1 | SEC31A    |
| XBP1 | SEC61A1   |
| XBP1 | SEC61B    |
| XBP1 | SEC61G    |
| XBP1 | SEC62     |
| XBP1 | SEC63     |
| XBP1 | SECISBP2L |
| XBP1 | SEL1L     |

|      |          |
|------|----------|
| XBP1 | SEL1L3   |
| XBP1 | SELPLG   |
| XBP1 | SENP2    |
| XBP1 | SENP7    |
| XBP1 | SEPHS1   |
| XBP1 | SEPT2    |
| XBP1 | SEPT6    |
| XBP1 | SERF2    |
| XBP1 | SERINC3  |
| XBP1 | SERP1    |
| XBP1 | SETD3    |
| XBP1 | SETD5    |
| XBP1 | SETD7    |
| XBP1 | SF3B2    |
| XBP1 | SF3B5    |
| XBP1 | SFMBT2   |
| XBP1 | SFXN2    |
| XBP1 | SGK1     |
| XBP1 | SGK3     |
| XBP1 | SGSM3    |
| XBP1 | SH3BGR   |
| XBP1 | SH3BP5L  |
| XBP1 | SH3GLB1  |
| XBP1 | SIAH1    |
| XBP1 | SIKE1    |
| XBP1 | SIL1     |
| XBP1 | SIPA1L3  |
| XBP1 | SIRT2    |
| XBP1 | SKIV2L   |
| XBP1 | SLC10A7  |
| XBP1 | SLC12A4  |
| XBP1 | SLC12A8  |
| XBP1 | SLC15A3  |
| XBP1 | SLC17A5  |
| XBP1 | SLC17A9  |
| XBP1 | SLC1A4   |
| XBP1 | SLC1A5   |
| XBP1 | SLC25A22 |
| XBP1 | SLC25A25 |
| XBP1 | SLC25A28 |
| XBP1 | SLC25A36 |
| XBP1 | SLC25A39 |
| XBP1 | SLC25A4  |
| XBP1 | SLC25A42 |
| XBP1 | SLC25A46 |
| XBP1 | SLC26A11 |
| XBP1 | SLC26A6  |
| XBP1 | SLC27A4  |
| XBP1 | SLC30A5  |
| XBP1 | SLC30A7  |

|      |          |
|------|----------|
| XBP1 | SLC31A2  |
| XBP1 | SLC33A1  |
| XBP1 | SLC35B1  |
| XBP1 | SLC35B3  |
| XBP1 | SLC35C1  |
| XBP1 | SLC35C2  |
| XBP1 | SLC38A10 |
| XBP1 | SLC38A2  |
| XBP1 | SLC38A9  |
| XBP1 | SLC39A11 |
| XBP1 | SLC39A13 |
| XBP1 | SLC39A7  |
| XBP1 | SLC39A8  |
| XBP1 | SLC39A9  |
| XBP1 | SLC3A2   |
| XBP1 | SLC43A2  |
| XBP1 | SLC44A1  |
| XBP1 | SLC4A1AP |
| XBP1 | SLC50A1  |
| XBP1 | SLC6A9   |
| XBP1 | SLC7A6   |
| XBP1 | SLC7A7   |
| XBP1 | SLC03A1  |
| XBP1 | SLC04A1  |
| XBP1 | SLC05A1  |
| XBP1 | SLU7     |
| XBP1 | SMAD5    |
| XBP1 | SMAP1    |
| XBP1 | SMARCA2  |
| XBP1 | SMCHD1   |
| XBP1 | SMDT1    |
| XBP1 | SMG7     |
| XBP1 | SMIM7    |
| XBP1 | SMPD1    |
| XBP1 | SMUG1    |
| XBP1 | SMYD2    |
| XBP1 | SMYD3    |
| XBP1 | SNAP29   |
| XBP1 | SNAPC3   |
| XBP1 | SND1     |
| XBP1 | SND1-IT1 |
| XBP1 | SNF8     |
| XBP1 | SNHG9    |
| XBP1 | SNRPN    |
| XBP1 | SNU13    |
| XBP1 | SNURF    |
| XBP1 | SNX13    |
| XBP1 | SOCS3    |
| XBP1 | SOX4     |
| XBP1 | SPAG7    |

|      |            |
|------|------------|
| XBP1 | SPATC1L    |
| XBP1 | SPATS2     |
| XBP1 | SPCS1      |
| XBP1 | SPIN2B     |
| XBP1 | SPINT2     |
| XBP1 | SPNS1      |
| XBP1 | SPOCK2     |
| XBP1 | SPOP       |
| XBP1 | SPPL2B     |
| XBP1 | SPRYD3     |
| XBP1 | SPSB3      |
| XBP1 | SPTBN1     |
| XBP1 | SPTSSA     |
| XBP1 | SPTY2D1    |
| XBP1 | SQL        |
| XBP1 | SQSTM1     |
| XBP1 | SRBD1      |
| XBP1 | SRD5A3     |
| XBP1 | SRGN       |
| XBP1 | SRM        |
| XBP1 | SRP14      |
| XBP1 | SRP19      |
| XBP1 | SRP54      |
| XBP1 | SRP68      |
| XBP1 | SRP72      |
| XBP1 | SRPRA      |
| XBP1 | SRRM2      |
| XBP1 | SRSF5      |
| XBP1 | SS18       |
| XBP1 | SS18L2     |
| XBP1 | SSPN       |
| XBP1 | SSR1       |
| XBP1 | SSR3       |
| XBP1 | SSR4       |
| XBP1 | SSSCA1     |
| XBP1 | SSTR2      |
| XBP1 | SSU72      |
| XBP1 | ST3GAL1    |
| XBP1 | ST3GAL2    |
| XBP1 | ST6GAL1    |
| XBP1 | ST6GALNAC4 |
| XBP1 | ST8SIA4    |
| XBP1 | STARD3     |
| XBP1 | STARD3NL   |
| XBP1 | STARD5     |
| XBP1 | STAT1      |
| XBP1 | STAT3      |
| XBP1 | STK17B     |
| XBP1 | STRN4      |
| XBP1 | STT3A      |

|      |         |
|------|---------|
| XBP1 | STT3B   |
| XBP1 | STUB1   |
| XBP1 | STX11   |
| XBP1 | STX17   |
| XBP1 | STX5    |
| XBP1 | STXBP2  |
| XBP1 | STXBP6  |
| XBP1 | SUB1    |
| XBP1 | SUCLG1  |
| XBP1 | SUCLG2  |
| XBP1 | SUC0    |
| XBP1 | SU0X    |
| XBP1 | SUPT5H  |
| XBP1 | SURF4   |
| XBP1 | SYNGR1  |
| XBP1 | SYNRG   |
| XBP1 | SYS1    |
| XBP1 | SYT15   |
| XBP1 | SYTL1   |
| XBP1 | SYVN1   |
| XBP1 | TAF10   |
| XBP1 | TAF13   |
| XBP1 | TAF4B   |
| XBP1 | TAF6    |
| XBP1 | TAF7    |
| XBP1 | TAGAP   |
| XBP1 | TARSL2  |
| XBP1 | TAX1BP1 |
| XBP1 | TBC1D14 |
| XBP1 | TBC1D15 |
| XBP1 | TBC1D20 |
| XBP1 | TBC1D23 |
| XBP1 | TBC1D25 |
| XBP1 | TBC1D2B |
| XBP1 | TBC1D7  |
| XBP1 | TBCC    |
| XBP1 | TBL2    |
| XBP1 | TCAIM   |
| XBP1 | TCEAL8  |
| XBP1 | TCF25   |
| XBP1 | TCF4    |
| XBP1 | TCIRG1  |
| XBP1 | TCP11L2 |
| XBP1 | TCTA    |
| XBP1 | TDG     |
| XBP1 | TDRD3   |
| XBP1 | TECPR2  |
| XBP1 | TEX264  |
| XBP1 | TFG     |
| XBP1 | TGDS    |

|      |          |
|------|----------|
| XBP1 | TGOLN2   |
| XBP1 | THADA    |
| XBP1 | THAP11   |
| XBP1 | THAP2    |
| XBP1 | THAP4    |
| XBP1 | THAP5    |
| XBP1 | THAP7    |
| XBP1 | THAP8    |
| XBP1 | THNSL2   |
| XBP1 | THUMPD3  |
| XBP1 | TIMM10B  |
| XBP1 | TIMM17A  |
| XBP1 | TIMP1    |
| XBP1 | TJAP1    |
| XBP1 | TLE1     |
| XBP1 | TLN1     |
| XBP1 | TM7SF2   |
| XBP1 | TM7SF3   |
| XBP1 | TM9SF1   |
| XBP1 | TM9SF2   |
| XBP1 | TM9SF3   |
| XBP1 | TM9SF4   |
| XBP1 | TMBIM6   |
| XBP1 | TMC6     |
| XBP1 | TMCC1    |
| XBP1 | TMC03    |
| XBP1 | TMED1    |
| XBP1 | TMED10   |
| XBP1 | TMED2    |
| XBP1 | TMED3    |
| XBP1 | TMED4    |
| XBP1 | TMED7    |
| XBP1 | TMED9    |
| XBP1 | TMEM101  |
| XBP1 | TMEM106A |
| XBP1 | TMEM134  |
| XBP1 | TMEM147  |
| XBP1 | TMEM154  |
| XBP1 | TMEM164  |
| XBP1 | TMEM165  |
| XBP1 | TMEM167A |
| XBP1 | TMEM179B |
| XBP1 | TMEM184B |
| XBP1 | TMEM184C |
| XBP1 | TMEM19   |
| XBP1 | TMEM199  |
| XBP1 | TMEM206  |
| XBP1 | TMEM214  |
| XBP1 | TMEM219  |
| XBP1 | TMEM230  |



|      |           |
|------|-----------|
| XBP1 | TMEM248   |
| XBP1 | TMEM256   |
| XBP1 | TMEM258   |
| XBP1 | TMEM263   |
| XBP1 | TMEM30A   |
| XBP1 | TMEM33    |
| XBP1 | TMEM39A   |
| XBP1 | TMEM41A   |
| XBP1 | TMEM41B   |
| XBP1 | TMEM45A   |
| XBP1 | TMEM50B   |
| XBP1 | TMEM59    |
| XBP1 | TMEM70    |
| XBP1 | TMEM8B    |
| XBP1 | TMEM9     |
| XBP1 | TMF1      |
| XBP1 | TMSB10    |
| XBP1 | TMUB1     |
| XBP1 | TMUB2     |
| XBP1 | TMX4      |
| XBP1 | TNFAIP8L2 |
| XBP1 | TNFRSF1B  |
| XBP1 | TNFSF8    |
| XBP1 | TNK2      |
| XBP1 | TNKS      |
| XBP1 | TNS3      |
| XBP1 | TOLLIP    |
| XBP1 | TOM1L2    |
| XBP1 | TOMM20    |
| XBP1 | TOP1      |
| XBP1 | TOP3B     |
| XBP1 | TOPORS    |
| XBP1 | TOR1AIP1  |
| XBP1 | TOR2A     |
| XBP1 | TOR3A     |
| XBP1 | TP53INP1  |
| XBP1 | TP73      |
| XBP1 | TPD52     |
| XBP1 | TPP2      |
| XBP1 | TPST2     |
| XBP1 | TPT1      |
| XBP1 | TRABD     |
| XBP1 | TRAF3     |
| XBP1 | TRAF3IP2  |
| XBP1 | TRAM1     |
| XBP1 | TRAM2     |
| XBP1 | TRAPPC2L  |
| XBP1 | TRAPPC6A  |
| XBP1 | TRIB1     |
| XBP1 | TRIM27    |

|      |          |
|------|----------|
| XBP1 | TRIM52   |
| XBP1 | TRIM73   |
| XBP1 | TRIP11   |
| XBP1 | TRIP12   |
| XBP1 | TRMT2A   |
| XBP1 | TRMT61B  |
| XBP1 | TRPC4AP  |
| XBP1 | TRPM4    |
| XBP1 | TRPM7    |
| XBP1 | TRPT1    |
| XBP1 | TSC22D3  |
| XBP1 | TSC22D4  |
| XBP1 | TSPAN13  |
| XBP1 | TSPAN31  |
| XBP1 | TSPAN4   |
| XBP1 | TSPYL2   |
| XBP1 | TTC1     |
| XBP1 | TTC13    |
| XBP1 | TTC14    |
| XBP1 | TTC17    |
| XBP1 | TTC3     |
| XBP1 | TTC7A    |
| XBP1 | TTC9     |
| XBP1 | TUSC2    |
| XBP1 | TVP23B   |
| XBP1 | TVP23C   |
| XBP1 | TWF1     |
| XBP1 | TXLNA    |
| XBP1 | TXLNB    |
| XBP1 | TXNDC11  |
| XBP1 | TXNDC15  |
| XBP1 | TXNDC5   |
| XBP1 | TXNL1    |
| XBP1 | TXNL4A   |
| XBP1 | U2AF1L4  |
| XBP1 | UAP1     |
| XBP1 | UBA5     |
| XBP1 | UBA6-AS1 |
| XBP1 | UBALD1   |
| XBP1 | UBB      |
| XBP1 | UBC      |
| XBP1 | UBE2D2   |
| XBP1 | UBE2D4   |
| XBP1 | UBE2H    |
| XBP1 | UBE2J1   |
| XBP1 | UBE2Q1   |
| XBP1 | UBE3A    |
| XBP1 | UBE4A    |
| XBP1 | UBFD1    |
| XBP1 | UBL3     |

|      |         |
|------|---------|
| XBP1 | UBL5    |
| XBP1 | UBN1    |
| XBP1 | UBN2    |
| XBP1 | UBQLN1  |
| XBP1 | UBR1    |
| XBP1 | UBXN4   |
| XBP1 | UBXN6   |
| XBP1 | UFC1    |
| XBP1 | UFL1    |
| XBP1 | UFM1    |
| XBP1 | UFSP2   |
| XBP1 | UGDH    |
| XBP1 | UNC13D  |
| XBP1 | UNC50   |
| XBP1 | UNC93B1 |
| XBP1 | UPF2    |
| XBP1 | UQCC1   |
| XBP1 | UQCC2   |
| XBP1 | UQCR11  |
| XBP1 | UQCRB   |
| XBP1 | UQCRFS1 |
| XBP1 | US01    |
| XBP1 | USP11   |
| XBP1 | USP16   |
| XBP1 | USP3    |
| XBP1 | USP36   |
| XBP1 | USP40   |
| XBP1 | USP48   |
| XBP1 | USP8    |
| XBP1 | UTRN    |
| XBP1 | UVSSA   |
| XBP1 | VAMP1   |
| XBP1 | VAMP2   |
| XBP1 | VAMP3   |
| XBP1 | VAMP4   |
| XBP1 | VANGL1  |
| XBP1 | VAPA    |
| XBP1 | VAV1    |
| XBP1 | VCP     |
| XBP1 | VDAC2   |
| XBP1 | VEGFA   |
| XBP1 | VKORC1  |
| XBP1 | VOPP1   |
| XBP1 | VPS33A  |
| XBP1 | VPS37A  |
| XBP1 | VPS37C  |
| XBP1 | VPS51   |
| XBP1 | VWA5A   |
| XBP1 | WBP2    |
| XBP1 | WDR33   |

|      |            |
|------|------------|
| XBP1 | WDR92      |
| XBP1 | WHAMM      |
| XBP1 | WIPI1      |
| XBP1 | WNT10A     |
| XBP1 | WNT6       |
| XBP1 | WRAP73     |
| XBP1 | WRB        |
| XBP1 | WWOX       |
| XBP1 | XAF1       |
| XBP1 | XIAP       |
| XBP1 | XIST       |
| XBP1 | XP04       |
| XBP1 | XRRA1      |
| XBP1 | YIF1A      |
| XBP1 | YIF1B      |
| XBP1 | YIPF1      |
| XBP1 | YIPF2      |
| XBP1 | YIPF3      |
| XBP1 | YIPF5      |
| XBP1 | YIPF6      |
| XBP1 | YKT6       |
| XBP1 | YPEL3      |
| XBP1 | YPEL5      |
| XBP1 | YTHDC1     |
| XBP1 | YTHDF1     |
| XBP1 | YWHAB      |
| XBP1 | ZBP1       |
| XBP1 | ZBTB11     |
| XBP1 | ZBTB11-AS1 |
| XBP1 | ZBTB7B     |
| XBP1 | ZBTB8A     |
| XBP1 | ZBTB80S    |
| XBP1 | ZC3H12D    |
| XBP1 | ZC3H15     |
| XBP1 | ZC3H7A     |
| XBP1 | ZCCHC17    |
| XBP1 | ZDBF2      |
| XBP1 | ZDHHC3     |
| XBP1 | ZDHHC4     |
| XBP1 | ZDHHC5     |
| XBP1 | ZEB1       |
| XBP1 | ZEB1-AS1   |
| XBP1 | ZFAND1     |
| XBP1 | ZFAND2A    |
| XBP1 | ZFAT       |
| XBP1 | ZFC3H1     |
| XBP1 | ZFP36L2    |
| XBP1 | ZFPL1      |
| XBP1 | ZFX        |
| XBP1 | ZFYVE27    |

|      |         |
|------|---------|
| XBP1 | ZKSCAN1 |
| XBP1 | ZNF133  |
| XBP1 | ZNF215  |
| XBP1 | ZNF24   |
| XBP1 | ZNF274  |
| XBP1 | ZNF275  |
| XBP1 | ZNF276  |
| XBP1 | ZNF281  |
| XBP1 | ZNF296  |
| XBP1 | ZNF3    |
| XBP1 | ZNF322  |
| XBP1 | ZNF354A |
| XBP1 | ZNF37A  |
| XBP1 | ZNF407  |
| XBP1 | ZNF500  |
| XBP1 | ZNF544  |
| XBP1 | ZNF566  |
| XBP1 | ZNF568  |
| XBP1 | ZNF576  |
| XBP1 | ZNF587  |
| XBP1 | ZNF593  |
| XBP1 | ZNF628  |
| XBP1 | ZNF652  |
| XBP1 | ZNF655  |
| XBP1 | ZNF706  |
| XBP1 | ZNF780A |
| XBP1 | ZNF790  |
| XBP1 | ZNF791  |
| XBP1 | ZNF804A |
| XBP1 | ZNF816  |
| XBP1 | ZNF841  |
| XBP1 | ZNHIT1  |
| XBP1 | ZRANB2  |
| XBP1 | ZRSR2   |
| XBP1 | ZSCAN5A |
| XBP1 | ZW10    |
| YBX1 | ABCA7   |
| YBX1 | ABCB8   |
| YBX1 | ABHD17B |
| YBX1 | ABR     |
| YBX1 | ACACA   |
| YBX1 | ACAP1   |
| YBX1 | ACAT2   |
| YBX1 | ACBD4   |
| YBX1 | ACIN1   |
| YBX1 | ACOT8   |
| YBX1 | ACSL5   |
| YBX1 | ACTL6A  |
| YBX1 | ACTR3B  |
| YBX1 | ACYP1   |

|      |          |
|------|----------|
| YBX1 | ADD1     |
| YBX1 | ADD3     |
| YBX1 | AEN      |
| YBX1 | AFF3     |
| YBX1 | AGBL5    |
| YBX1 | AGFG1    |
| YBX1 | AGFG2    |
| YBX1 | AG01     |
| YBX1 | AGPAT1   |
| YBX1 | AHCY     |
| YBX1 | AHDC1    |
| YBX1 | AIFM1    |
| YBX1 | AIMP2    |
| YBX1 | AK2      |
| YBX1 | AKAP11   |
| YBX1 | AKR1B1   |
| YBX1 | AKT1S1   |
| YBX1 | ALCAM    |
| YBX1 | ALDH4A1  |
| YBX1 | ALDH6A1  |
| YBX1 | ALG12    |
| YBX1 | ALKBH6   |
| YBX1 | AMD1     |
| YBX1 | ANKRD49  |
| YBX1 | ANKRD54  |
| YBX1 | ANP32A   |
| YBX1 | AP1AR    |
| YBX1 | AP2A1    |
| YBX1 | AP2S1    |
| YBX1 | AP3M2    |
| YBX1 | AP4M1    |
| YBX1 | ARAF     |
| YBX1 | ARFGAP2  |
| YBX1 | ARFIP2   |
| YBX1 | ARHGAP4  |
| YBX1 | ARHGEF12 |
| YBX1 | ARHGEF9  |
| YBX1 | ARID1B   |
| YBX1 | ARID3A   |
| YBX1 | ARID4A   |
| YBX1 | ARID4B   |
| YBX1 | ARL17B   |
| YBX1 | ARL4A    |
| YBX1 | ARL6IP1  |
| YBX1 | ARL6IP6  |
| YBX1 | ARMC1    |
| YBX1 | ARRB2    |
| YBX1 | ASB7     |
| YBX1 | ASCL2    |
| YBX1 | ASNA1    |

|      |            |
|------|------------|
| YBX1 | ASPM       |
| YBX1 | ATAD2      |
| YBX1 | ATF4       |
| YBX1 | ATF7       |
| YBX1 | ATG2A      |
| YBX1 | ATP2A1-AS1 |
| YBX1 | ATP2A2     |
| YBX1 | ATXN2L     |
| YBX1 | ATXN7L3    |
| YBX1 | AURKA      |
| YBX1 | AVIL       |
| YBX1 | AXIN1      |
| YBX1 | B4GALT3    |
| YBX1 | BAZ1A      |
| YBX1 | BBX        |
| YBX1 | BCKDHB     |
| YBX1 | BCL11A     |
| YBX1 | BCL2L1     |
| YBX1 | BCL2L11    |
| YBX1 | BCLAF1     |
| YBX1 | BDH1       |
| YBX1 | BICDL1     |
| YBX1 | BMF        |
| YBX1 | BPGM       |
| YBX1 | BRCA1      |
| YBX1 | BRD2       |
| YBX1 | BTBD1      |
| YBX1 | BUB3       |
| YBX1 | C12orf49   |
| YBX1 | C12orf65   |
| YBX1 | C19orf54   |
| YBX1 | C19orf73   |
| YBX1 | C1orf159   |
| YBX1 | C20orf27   |
| YBX1 | C21orf58   |
| YBX1 | C2orf69    |
| YBX1 | C5orf51    |
| YBX1 | C9orf85    |
| YBX1 | CABIN1     |
| YBX1 | CABLES2    |
| YBX1 | CALM2      |
| YBX1 | CALR       |
| YBX1 | CAMTA1     |
| YBX1 | CAND1      |
| YBX1 | CAT        |
| YBX1 | CBX1       |
| YBX1 | CBX5       |
| YBX1 | CBX8       |
| YBX1 | CCDC102A   |
| YBX1 | CCDC167    |

|      |          |
|------|----------|
| YBX1 | CCDC189  |
| YBX1 | CCDC51   |
| YBX1 | CCDC61   |
| YBX1 | CCDC71L  |
| YBX1 | CCNA2    |
| YBX1 | CCNB2    |
| YBX1 | CCND1    |
| YBX1 | CCNE1    |
| YBX1 | CCNE2    |
| YBX1 | CCNF     |
| YBX1 | CCNG1    |
| YBX1 | CCNG2    |
| YBX1 | CCNK     |
| YBX1 | CCSER2   |
| YBX1 | CCT7     |
| YBX1 | CD48     |
| YBX1 | CDC23    |
| YBX1 | CDC45    |
| YBX1 | CDC6     |
| YBX1 | CDCA2    |
| YBX1 | CDCA3    |
| YBX1 | CDK1     |
| YBX1 | CDK19    |
| YBX1 | CDK2     |
| YBX1 | CDK2AP2  |
| YBX1 | CDK5RAP3 |
| YBX1 | CDKN2D   |
| YBX1 | CDKN3    |
| YBX1 | CDV3     |
| YBX1 | CEBPG    |
| YBX1 | CENPF    |
| YBX1 | CENPM    |
| YBX1 | CEP41    |
| YBX1 | CEP57    |
| YBX1 | CEP85    |
| YBX1 | CEP89    |
| YBX1 | CEP95    |
| YBX1 | CETN2    |
| YBX1 | CFAP36   |
| YBX1 | CGGBP1   |
| YBX1 | CHAF1A   |
| YBX1 | CHD2     |
| YBX1 | CHD6     |
| YBX1 | CHEK2    |
| YBX1 | CHKA     |
| YBX1 | CHST10   |
| YBX1 | CHTF18   |
| YBX1 | CIC      |
| YBX1 | CIRBP    |
| YBX1 | CKAP2    |



|      |         |
|------|---------|
| YBX1 | CKAP2L  |
| YBX1 | CKAP5   |
| YBX1 | CKS1B   |
| YBX1 | CKS2    |
| YBX1 | CLEC16A |
| YBX1 | CLK3    |
| YBX1 | CLPX    |
| YBX1 | CLTA    |
| YBX1 | CNBP    |
| YBX1 | CNN3    |
| YBX1 | CNNM3   |
| YBX1 | CN0T1   |
| YBX1 | CN0T3   |
| YBX1 | COQ10B  |
| YBX1 | COTL1   |
| YBX1 | COX7B   |
| YBX1 | CREB3L2 |
| YBX1 | CREB5   |
| YBX1 | CRIM1   |
| YBX1 | CRY2    |
| YBX1 | CSE1L   |
| YBX1 | CSNK1G3 |
| YBX1 | CTPS1   |
| YBX1 | CUL4B   |
| YBX1 | CUTA    |
| YBX1 | CYB5B   |
| YBX1 | CYHR1   |
| YBX1 | CYLD    |
| YBX1 | CYSTM1  |
| YBX1 | DAXX    |
| YBX1 | DBI     |
| YBX1 | DBP     |
| YBX1 | DCAF11  |
| YBX1 | DCAF7   |
| YBX1 | DCAKD   |
| YBX1 | DCLRE1C |
| YBX1 | DCP2    |
| YBX1 | DCUN1D4 |
| YBX1 | DDA1    |
| YBX1 | DDIT4   |
| YBX1 | DDT     |
| YBX1 | DDX11   |
| YBX1 | DDX19B  |
| YBX1 | DDX5    |
| YBX1 | DDX54   |
| YBX1 | DDX6    |
| YBX1 | DENR    |
| YBX1 | DERL2   |
| YBX1 | DEXI    |
| YBX1 | DHCR24  |

|      |         |
|------|---------|
| YBX1 | DHCR7   |
| YBX1 | DHODH   |
| YBX1 | DHX34   |
| YBX1 | DHX57   |
| YBX1 | DICER1  |
| YBX1 | DLD     |
| YBX1 | DLG1    |
| YBX1 | DLGAP5  |
| YBX1 | DMPK    |
| YBX1 | DNAJB1  |
| YBX1 | DNAJB11 |
| YBX1 | DNAJB2  |
| YBX1 | DNAJC30 |
| YBX1 | DNAJC4  |
| YBX1 | DNAJC7  |
| YBX1 | DNAL1   |
| YBX1 | DNM2    |
| YBX1 | DOLPP1  |
| YBX1 | DPF1    |
| YBX1 | DPP3    |
| YBX1 | DRG1    |
| YBX1 | DUSP10  |
| YBX1 | DYM     |
| YBX1 | DYNLL1  |
| YBX1 | DYNLT3  |
| YBX1 | DYRK1B  |
| YBX1 | E2F3    |
| YBX1 | E2F8    |
| YBX1 | E4F1    |
| YBX1 | EAF2    |
| YBX1 | EBP     |
| YBX1 | ECSIT   |
| YBX1 | EDEM1   |
| YBX1 | EEA1    |
| YBX1 | EFCAB11 |
| YBX1 | EFNA4   |
| YBX1 | EFNB1   |
| YBX1 | EHD4    |
| YBX1 | EIF2B2  |
| YBX1 | EIF3L   |
| YBX1 | EIF5    |
| YBX1 | ELAC2   |
| YBX1 | ELAVL1  |
| YBX1 | ELK1    |
| YBX1 | ELM01   |
| YBX1 | ELOVL5  |
| YBX1 | ELP4    |
| YBX1 | EMC2    |
| YBX1 | EMD     |
| YBX1 | EML2    |

|      |          |
|------|----------|
| YBX1 | ENSA     |
| YBX1 | EPB41    |
| YBX1 | EPC1     |
| YBX1 | EPM2AIP1 |
| YBX1 | ERCC8    |
| YBX1 | ETAA1    |
| YBX1 | ETF1     |
| YBX1 | ETFB     |
| YBX1 | ETV5     |
| YBX1 | EX0SC1   |
| YBX1 | EX0SC2   |
| YBX1 | EXT1     |
| YBX1 | EZH2     |
| YBX1 | F11R     |
| YBX1 | FAAP24   |
| YBX1 | FADS1    |
| YBX1 | FADS2    |
| YBX1 | FAM107B  |
| YBX1 | FAM110A  |
| YBX1 | FAM126A  |
| YBX1 | FAM161A  |
| YBX1 | FAM185A  |
| YBX1 | FAM204A  |
| YBX1 | FAM72A   |
| YBX1 | FAM72B   |
| YBX1 | FAM76B   |
| YBX1 | FANCA    |
| YBX1 | FAR1     |
| YBX1 | FARP2    |
| YBX1 | FARSA    |
| YBX1 | FBXL20   |
| YBX1 | FBXL3    |
| YBX1 | FBX011   |
| YBX1 | FBX05    |
| YBX1 | FDFT1    |
| YBX1 | FDPS     |
| YBX1 | FDXR     |
| YBX1 | FGD6     |
| YBX1 | FH       |
| YBX1 | FLNA     |
| YBX1 | FLYWCH1  |
| YBX1 | FNBP1    |
| YBX1 | FNBP4    |
| YBX1 | FNIP1    |
| YBX1 | FOXN3    |
| YBX1 | FOX01    |
| YBX1 | FOXP1    |
| YBX1 | FPGS     |
| YBX1 | FUT8     |
| YBX1 | FXYD5    |

|      |          |
|------|----------|
| YBX1 | FYN      |
| YBX1 | FZD3     |
| YBX1 | G3BP1    |
| YBX1 | GAN      |
| YBX1 | GANAB    |
| YBX1 | GART     |
| YBX1 | GATAD2A  |
| YBX1 | GATAD2B  |
| YBX1 | GBF1     |
| YBX1 | GCA      |
| YBX1 | GCDH     |
| YBX1 | GCHFR    |
| YBX1 | GCNT1    |
| YBX1 | GFOD1    |
| YBX1 | GGCT     |
| YBX1 | GGPS1    |
| YBX1 | GID4     |
| YBX1 | GIPC1    |
| YBX1 | GLA      |
| YBX1 | GLRX5    |
| YBX1 | GLS      |
| YBX1 | GLTP     |
| YBX1 | GOLGA2   |
| YBX1 | GOLGB1   |
| YBX1 | GOLPH3L  |
| YBX1 | GOLT1B   |
| YBX1 | GOT1     |
| YBX1 | GPR108   |
| YBX1 | GPR180   |
| YBX1 | GPR89A   |
| YBX1 | GPR89B   |
| YBX1 | GPX4     |
| YBX1 | GRPEL1   |
| YBX1 | GSK3B    |
| YBX1 | GTDC1    |
| YBX1 | GTF2E1   |
| YBX1 | GTF2IRD1 |
| YBX1 | GTF2IRD2 |
| YBX1 | GTF3C5   |
| YBX1 | GTPBP1   |
| YBX1 | H2AFJ    |
| YBX1 | H2AFX    |
| YBX1 | H2AFY    |
| YBX1 | H2AFZ    |
| YBX1 | H3F3B    |
| YBX1 | HAGH     |
| YBX1 | HAUS7    |
| YBX1 | HDAC1    |
| YBX1 | HERC2    |
| YBX1 | HERPUD1  |

|      |           |
|------|-----------|
| YBX1 | HES1      |
| YBX1 | HEXIM2    |
| YBX1 | HIBADH    |
| YBX1 | HIF1A     |
| YBX1 | HIGD1A    |
| YBX1 | HIST2H2AC |
| YBX1 | HIVEP3    |
| YBX1 | HMBS      |
| YBX1 | HMGB1     |
| YBX1 | HMGB2     |
| YBX1 | HMGB3     |
| YBX1 | HMGCR     |
| YBX1 | HMGCS1    |
| YBX1 | HMGN2     |
| YBX1 | HMGN3     |
| YBX1 | HMMR      |
| YBX1 | HNRNPA0   |
| YBX1 | HNRNPC    |
| YBX1 | HNRNPL    |
| YBX1 | HNRNPLL   |
| YBX1 | HNRNPR    |
| YBX1 | HNRNPUL1  |
| YBX1 | HNRNPUL2  |
| YBX1 | HOOK1     |
| YBX1 | HSCB      |
| YBX1 | HSD17B10  |
| YBX1 | HSD17B12  |
| YBX1 | HSPA8     |
| YBX1 | HSPH1     |
| YBX1 | HTATIP2   |
| YBX1 | HYLS1     |
| YBX1 | HYOU1     |
| YBX1 | IARS      |
| YBX1 | IBTK      |
| YBX1 | ID2       |
| YBX1 | IER5      |
| YBX1 | IFNLR1    |
| YBX1 | IFT27     |
| YBX1 | IGF2BP3   |
| YBX1 | IL12RB1   |
| YBX1 | ILF2      |
| YBX1 | IMMP1L    |
| YBX1 | IMP3      |
| YBX1 | IP013     |
| YBX1 | IQCB1     |
| YBX1 | ISOC2     |
| YBX1 | ITSN1     |
| YBX1 | IVNS1ABP  |
| YBX1 | JARID2    |
| YBX1 | JOSD1     |

|      |           |
|------|-----------|
| YBX1 | JUN       |
| YBX1 | JUP       |
| YBX1 | KANSL2    |
| YBX1 | KAT6B     |
| YBX1 | KAT7      |
| YBX1 | KATNAL2   |
| YBX1 | KATNB1    |
| YBX1 | KBTBD8    |
| YBX1 | KCNAB2    |
| YBX1 | KCNMB3    |
| YBX1 | KCNQ10T1  |
| YBX1 | KCTD20    |
| YBX1 | KCTD9     |
| YBX1 | KDM3B     |
| YBX1 | KDM4B     |
| YBX1 | KDM6B     |
| YBX1 | KHSRP     |
| YBX1 | KIF1BP    |
| YBX1 | KLF10     |
| YBX1 | KLF6      |
| YBX1 | KLF9      |
| YBX1 | KLHL25    |
| YBX1 | KLHL5     |
| YBX1 | KMT2E     |
| YBX1 | KMT5B     |
| YBX1 | KMT5C     |
| YBX1 | KPNA2     |
| YBX1 | KPNA4     |
| YBX1 | KPNB1     |
| YBX1 | LAMTOR1   |
| YBX1 | LANCL1    |
| YBX1 | LAPTM4A   |
| YBX1 | LBR       |
| YBX1 | LDB1      |
| YBX1 | LEMD3     |
| YBX1 | LENG1     |
| YBX1 | LGALS1    |
| YBX1 | LGMN      |
| YBX1 | LIMK2     |
| YBX1 | LIN52     |
| YBX1 | LINC01003 |
| YBX1 | LMCD1     |
| YBX1 | LONRF3    |
| YBX1 | LPCAT3    |
| YBX1 | LPXN      |
| YBX1 | LRCH4     |
| YBX1 | LRP8      |
| YBX1 | LRRC20    |
| YBX1 | LRRC45    |
| YBX1 | LSS       |

|      |            |
|------|------------|
| YBX1 | LTBP4      |
| YBX1 | LY75       |
| YBX1 | M6PR       |
| YBX1 | MACROD2    |
| YBX1 | MAEA       |
| YBX1 | MAF1       |
| YBX1 | MAP3K14    |
| YBX1 | MAP3K3     |
| YBX1 | MAP4       |
| YBX1 | MAPK7      |
| YBX1 | MAPKAPK3   |
| YBX1 | MAPRE2     |
| YBX1 | MAST3      |
| YBX1 | MAT2B      |
| YBX1 | MBTD1      |
| YBX1 | MCM3       |
| YBX1 | MCM3AP-AS1 |
| YBX1 | MCM7       |
| YBX1 | MDC1       |
| YBX1 | MDM1       |
| YBX1 | MED24      |
| YBX1 | MED29      |
| YBX1 | MEF2C      |
| YBX1 | MEF2D      |
| YBX1 | MEPCE      |
| YBX1 | METRN      |
| YBX1 | METTLL13   |
| YBX1 | MFSD2A     |
| YBX1 | MICU2      |
| YBX1 | MID1IP1    |
| YBX1 | MIER3      |
| YBX1 | MIIP       |
| YBX1 | MIR22HG    |
| YBX1 | MIS12      |
| YBX1 | MKL1       |
| YBX1 | MKNK2      |
| YBX1 | MLEC       |
| YBX1 | MMAA       |
| YBX1 | MMAB       |
| YBX1 | MNS1       |
| YBX1 | MOCS2      |
| YBX1 | MON1A      |
| YBX1 | MORC2      |
| YBX1 | MORF4L2    |
| YBX1 | MORN2      |
| YBX1 | MOSPD3     |
| YBX1 | MPND       |
| YBX1 | MPRIP      |
| YBX1 | MPV17L2    |
| YBX1 | MRM3       |

|      |          |
|------|----------|
| YBX1 | MROH1    |
| YBX1 | MRPL51   |
| YBX1 | MRPS12   |
| YBX1 | MRPS18B  |
| YBX1 | MRPS30   |
| YBX1 | MRPS36   |
| YBX1 | MSL3     |
| YBX1 | MSM01    |
| YBX1 | MTA2     |
| YBX1 | MTFR2    |
| YBX1 | MTMR4    |
| YBX1 | MTR      |
| YBX1 | MVD      |
| YBX1 | MVK      |
| YBX1 | MXD4     |
| YBX1 | MYB      |
| YBX1 | MYL6     |
| YBX1 | N4BP2    |
| YBX1 | NAA60    |
| YBX1 | NADK2    |
| YBX1 | NAP1L4   |
| YBX1 | NARF     |
| YBX1 | NCAPD2   |
| YBX1 | NCAPD3   |
| YBX1 | NCAPH    |
| YBX1 | NCDN     |
| YBX1 | NCK2     |
| YBX1 | NCOA2    |
| YBX1 | NCOA5    |
| YBX1 | NDE1     |
| YBX1 | NDUFA5   |
| YBX1 | NDUFAF2  |
| YBX1 | NDUFB11  |
| YBX1 | NDUFB3   |
| YBX1 | NDUFS8   |
| YBX1 | NEDD4L   |
| YBX1 | NEMP1    |
| YBX1 | NET1     |
| YBX1 | NEU1     |
| YBX1 | NF2      |
| YBX1 | NFATC3   |
| YBX1 | NFE2L1   |
| YBX1 | NFKB2    |
| YBX1 | NFKBIB   |
| YBX1 | NFYA     |
| YBX1 | NFYC     |
| YBX1 | NFYC-AS1 |
| YBX1 | NLK      |
| YBX1 | NLRP11   |
| YBX1 | NMI      |



|      |         |
|------|---------|
| YBX1 | NMT1    |
| YBX1 | NNT     |
| YBX1 | NNT-AS1 |
| YBX1 | NOP56   |
| YBX1 | NR2C2   |
| YBX1 | NR4A2   |
| YBX1 | NRAV    |
| YBX1 | NRBP1   |
| YBX1 | NRDC    |
| YBX1 | NRGN    |
| YBX1 | NRL     |
| YBX1 | NRP2    |
| YBX1 | NSDHL   |
| YBX1 | NT5DC1  |
| YBX1 | NT5DC2  |
| YBX1 | NUBP2   |
| YBX1 | NUDC    |
| YBX1 | NUDCD2  |
| YBX1 | NUDT2   |
| YBX1 | NUMA1   |
| YBX1 | NUMB    |
| YBX1 | NUP214  |
| YBX1 | NUP93   |
| YBX1 | NUS1    |
| YBX1 | NUSAP1  |
| YBX1 | OAT     |
| YBX1 | OCIAD1  |
| YBX1 | OGFOD1  |
| YBX1 | OGT     |
| YBX1 | OIP5    |
| YBX1 | OLA1    |
| YBX1 | OPA3    |
| YBX1 | ORC6    |
| YBX1 | ORMDL2  |
| YBX1 | OSBP    |
| YBX1 | OSBPL3  |
| YBX1 | OSBPL9  |
| YBX1 | OTUD5   |
| YBX1 | P4HB    |
| YBX1 | PAK4    |
| YBX1 | PALLD   |
| YBX1 | PASK    |
| YBX1 | PAX5    |
| YBX1 | PBXIP1  |
| YBX1 | PCDH9   |
| YBX1 | PCF11   |
| YBX1 | PCK2    |
| YBX1 | PCNA    |
| YBX1 | PCY0X1L |
| YBX1 | PDCD10  |

|      |          |
|------|----------|
| YBX1 | PDCD4    |
| YBX1 | PDE6D    |
| YBX1 | PDIA6    |
| YBX1 | PDK4     |
| YBX1 | PEBP1    |
| YBX1 | PELP1    |
| YBX1 | PES1     |
| YBX1 | PET100   |
| YBX1 | PEX2     |
| YBX1 | PGP      |
| YBX1 | PGRMC2   |
| YBX1 | PHF19    |
| YBX1 | PHF20    |
| YBX1 | PHKG2    |
| YBX1 | PHPT1    |
| YBX1 | PI4K2A   |
| YBX1 | PIGA     |
| YBX1 | PIGS     |
| YBX1 | PIM3     |
| YBX1 | PIN1     |
| YBX1 | PIP4K2B  |
| YBX1 | PITPNC1  |
| YBX1 | PITRM1   |
| YBX1 | PKP4     |
| YBX1 | PMF1     |
| YBX1 | PMM1     |
| YBX1 | PMS2     |
| YBX1 | PNN      |
| YBX1 | PNP      |
| YBX1 | PNP0     |
| YBX1 | PNRC2    |
| YBX1 | POLA1    |
| YBX1 | POLD4    |
| YBX1 | POLR3H   |
| YBX1 | POLR3K   |
| YBX1 | PPM1A    |
| YBX1 | PPM1B    |
| YBX1 | PPP1R10  |
| YBX1 | PPP1R12B |
| YBX1 | PPP1R7   |
| YBX1 | PPP2R5A  |
| YBX1 | PPP2R5C  |
| YBX1 | PPP2R5D  |
| YBX1 | PPP3CA   |
| YBX1 | PPP6R3   |
| YBX1 | PRADC1   |
| YBX1 | PRDM10   |
| YBX1 | PRKCSH   |
| YBX1 | PRKCZ    |
| YBX1 | PRMT1    |

|      |           |
|------|-----------|
| YBX1 | PROSER3   |
| YBX1 | PRPF40A   |
| YBX1 | PRPSAP2   |
| YBX1 | PSAT1     |
| YBX1 | PSMA3-AS1 |
| YBX1 | PSMA5     |
| YBX1 | PSMB3     |
| YBX1 | PTBP1     |
| YBX1 | PTGER4    |
| YBX1 | PTMA      |
| YBX1 | PTMS      |
| YBX1 | PWWP2A    |
| YBX1 | PXMP4     |
| YBX1 | QPCTL     |
| YBX1 | RAB33A    |
| YBX1 | RAB6A     |
| YBX1 | RAB8A     |
| YBX1 | RAB8B     |
| YBX1 | RABGAP1   |
| YBX1 | RABL3     |
| YBX1 | RACGAP1   |
| YBX1 | RAD18     |
| YBX1 | RALB      |
| YBX1 | RALY      |
| YBX1 | RANBP9    |
| YBX1 | RAP2A     |
| YBX1 | RASSF2    |
| YBX1 | RASSF7    |
| YBX1 | RAVER1    |
| YBX1 | RBBP4     |
| YBX1 | RBM14     |
| YBX1 | RBM15     |
| YBX1 | RBM23     |
| YBX1 | RBM3      |
| YBX1 | RBM4      |
| YBX1 | RBM45     |
| YBX1 | RBM6      |
| YBX1 | RCL1      |
| YBX1 | RCN1      |
| YBX1 | RCOR1     |
| YBX1 | REC8      |
| YBX1 | RECQL     |
| YBX1 | RECQL5    |
| YBX1 | RERE      |
| YBX1 | RFWD3     |
| YBX1 | RFX2      |
| YBX1 | RFX5      |
| YBX1 | RGS16     |
| YBX1 | RHEB      |
| YBX1 | RHEBL1    |

|      |          |
|------|----------|
| YBX1 | RHOF     |
| YBX1 | RHOQ     |
| YBX1 | RIN3     |
| YBX1 | RIPK2    |
| YBX1 | RLN1     |
| YBX1 | RLN2     |
| YBX1 | RMDN3    |
| YBX1 | RMI2     |
| YBX1 | RNF121   |
| YBX1 | RNF181   |
| YBX1 | RNF19A   |
| YBX1 | RNF220   |
| YBX1 | RNF26    |
| YBX1 | RNF34    |
| YBX1 | RNF40    |
| YBX1 | RNF6     |
| YBX1 | ROGDI    |
| YBX1 | RPA2     |
| YBX1 | RPE      |
| YBX1 | RPL13    |
| YBX1 | RPL13A   |
| YBX1 | RPL17    |
| YBX1 | RPLP0    |
| YBX1 | RPRD2    |
| YBX1 | RPS6KA2  |
| YBX1 | RPUSD1   |
| YBX1 | RUFY1    |
| YBX1 | RUNX1    |
| YBX1 | S1PR2    |
| YBX1 | SAP130   |
| YBX1 | SAP30BP  |
| YBX1 | SARS2    |
| YBX1 | SCD      |
| YBX1 | SEC23B   |
| YBX1 | SEC31A   |
| YBX1 | SERPINE2 |
| YBX1 | SERPINI1 |
| YBX1 | SERTAD1  |
| YBX1 | SERTAD3  |
| YBX1 | SESN2    |
| YBX1 | SETD3    |
| YBX1 | SETD5    |
| YBX1 | SF1      |
| YBX1 | SF3B4    |
| YBX1 | SFXN5    |
| YBX1 | SH2D3C   |
| YBX1 | SH3GL1   |
| YBX1 | SH3GLB2  |
| YBX1 | SHARPIN  |
| YBX1 | SHC1     |

|      |          |
|------|----------|
| YBX1 | SHKBP1   |
| YBX1 | SIGMAR1  |
| YBX1 | SIN3A    |
| YBX1 | SIRT2    |
| YBX1 | SKA2     |
| YBX1 | SLC11A2  |
| YBX1 | SLC16A4  |
| YBX1 | SLC16A9  |
| YBX1 | SLC1A4   |
| YBX1 | SLC25A23 |
| YBX1 | SLC25A25 |
| YBX1 | SLC25A28 |
| YBX1 | SLC2A8   |
| YBX1 | SLC30A1  |
| YBX1 | SLC37A1  |
| YBX1 | SLC43A2  |
| YBX1 | SLC46A3  |
| YBX1 | SLC9A3R1 |
| YBX1 | SMAD2    |
| YBX1 | SMAP2    |
| YBX1 | SMC2     |
| YBX1 | SMIM4    |
| YBX1 | SMYD2    |
| YBX1 | SND1     |
| YBX1 | SNHG10   |
| YBX1 | SNRNP25  |
| YBX1 | SNRPA    |
| YBX1 | SNX11    |
| YBX1 | SOD2     |
| YBX1 | SON      |
| YBX1 | SP2      |
| YBX1 | SPAG7    |
| YBX1 | SPC25    |
| YBX1 | SPSB3    |
| YBX1 | SPTLC2   |
| YBX1 | SRD5A3   |
| YBX1 | SRF      |
| YBX1 | SRGAP2C  |
| YBX1 | SRM      |
| YBX1 | SRP9     |
| YBX1 | SRSF1    |
| YBX1 | SRSF3    |
| YBX1 | SRSF6    |
| YBX1 | ST20     |
| YBX1 | ST8SIA4  |
| YBX1 | STAG1    |
| YBX1 | STARD3NL |
| YBX1 | STARD7   |
| YBX1 | STAT3    |
| YBX1 | STAT6    |

|      |              |
|------|--------------|
| YBX1 | STIL         |
| YBX1 | STMN1        |
| YBX1 | STRAP        |
| YBX1 | STX5         |
| YBX1 | STX7         |
| YBX1 | SUCLG2       |
| YBX1 | SUFU         |
| YBX1 | SUN2         |
| YBX1 | SWSAP1       |
| YBX1 | SYVN1        |
| YBX1 | TACC3        |
| YBX1 | TADA2B       |
| YBX1 | TAF1C        |
| YBX1 | TAF8         |
| YBX1 | TANG02       |
| YBX1 | TARS2        |
| YBX1 | TBC1D10B     |
| YBX1 | TBCC         |
| YBX1 | TBL1XR1      |
| YBX1 | TCEAL4       |
| YBX1 | TCERG1       |
| YBX1 | TCF19        |
| YBX1 | TCF4         |
| YBX1 | TCTN3        |
| YBX1 | TDP1         |
| YBX1 | TDRD3        |
| YBX1 | TECR         |
| YBX1 | TERF1        |
| YBX1 | TES          |
| YBX1 | TGDS         |
| YBX1 | TGM2         |
| YBX1 | THAP7        |
| YBX1 | THAP7-AS1    |
| YBX1 | THAP8        |
| YBX1 | THAP9        |
| YBX1 | THAP9-AS1    |
| YBX1 | THUMPD3-AS1  |
| YBX1 | TIGAR        |
| YBX1 | TLE1         |
| YBX1 | TLE3         |
| YBX1 | TLE4         |
| YBX1 | TLK1         |
| YBX1 | TLK2         |
| YBX1 | TM2D2        |
| YBX1 | TMEM129      |
| YBX1 | TMEM14A      |
| YBX1 | TMEM161B-AS1 |
| YBX1 | TMEM189      |
| YBX1 | TMEM218      |
| YBX1 | TMEM256      |

|      |          |
|------|----------|
| YBX1 | TMEM50B  |
| YBX1 | TMEM97   |
| YBX1 | TMTC4    |
| YBX1 | TNFAIP3  |
| YBX1 | TNFAIP8  |
| YBX1 | TNRC6B   |
| YBX1 | TOB1     |
| YBX1 | TOB2     |
| YBX1 | TOMM40   |
| YBX1 | TOMM40L  |
| YBX1 | TOP1MT   |
| YBX1 | TOP2A    |
| YBX1 | TP53BP1  |
| YBX1 | TPCN1    |
| YBX1 | TPD52L2  |
| YBX1 | TPX2     |
| YBX1 | TRAFD1   |
| YBX1 | TRAPPC6A |
| YBX1 | TRAPPC6B |
| YBX1 | TRIM59   |
| YBX1 | TRIM68   |
| YBX1 | TRIM73   |
| YBX1 | TRIOBP   |
| YBX1 | TRIP4    |
| YBX1 | TRMT10B  |
| YBX1 | TRUB1    |
| YBX1 | TSC22D1  |
| YBX1 | TSPAN33  |
| YBX1 | TTBK2    |
| YBX1 | TTC39C   |
| YBX1 | TTC9C    |
| YBX1 | TTF2     |
| YBX1 | TUBA1C   |
| YBX1 | TUBB2B   |
| YBX1 | TUBB4B   |
| YBX1 | TULP3    |
| YBX1 | TUSC2    |
| YBX1 | TXNDC16  |
| YBX1 | TYK2     |
| YBX1 | TYSND1   |
| YBX1 | TYW1     |
| YBX1 | TYW1B    |
| YBX1 | UBALD2   |
| YBX1 | UBB      |
| YBX1 | UBE2C    |
| YBX1 | UBE2F    |
| YBX1 | UBE2S    |
| YBX1 | UBE2T    |
| YBX1 | UBP1     |
| YBX1 | UBR5     |

|      |         |
|------|---------|
| YBX1 | UBTD2   |
| YBX1 | UBXN11  |
| YBX1 | UCP2    |
| YBX1 | UHRF1   |
| YBX1 | UNG     |
| YBX1 | UNK     |
| YBX1 | UQCRC2  |
| YBX1 | USF3    |
| YBX1 | USP13   |
| YBX1 | USP16   |
| YBX1 | VAMP1   |
| YBX1 | VCP     |
| YBX1 | VEZT    |
| YBX1 | VLDLR   |
| YBX1 | VPS35   |
| YBX1 | VRK1    |
| YBX1 | WAS     |
| YBX1 | WASF2   |
| YBX1 | WBP1L   |
| YBX1 | WDR6    |
| YBX1 | WDR62   |
| YBX1 | WDR81   |
| YBX1 | WDR89   |
| YBX1 | WFS1    |
| YBX1 | WHAMM   |
| YBX1 | WNT16   |
| YBX1 | XAB2    |
| YBX1 | XP01    |
| YBX1 | XRCC3   |
| YBX1 | YBX1    |
| YBX1 | YIF1A   |
| YBX1 | YJEFN3  |
| YBX1 | YWHAQ   |
| YBX1 | YWHAZ   |
| YBX1 | ZBTB10  |
| YBX1 | ZBTB20  |
| YBX1 | ZBTB26  |
| YBX1 | ZBTB32  |
| YBX1 | ZC3H14  |
| YBX1 | ZCWPW1  |
| YBX1 | ZDHC16  |
| YBX1 | ZDHC24  |
| YBX1 | ZDHC5   |
| YBX1 | ZFAND6  |
| YBX1 | ZFP82   |
| YBX1 | ZFP91   |
| YBX1 | ZFYVE21 |
| YBX1 | ZMYM2   |
| YBX1 | ZMYND8  |
| YBX1 | ZNF124  |



|      |          |
|------|----------|
| YBX1 | ZNF213   |
| YBX1 | ZNF253   |
| YBX1 | ZNF263   |
| YBX1 | ZNF267   |
| YBX1 | ZNF326   |
| YBX1 | ZNF330   |
| YBX1 | ZNF367   |
| YBX1 | ZNF397   |
| YBX1 | ZNF43    |
| YBX1 | ZNF430   |
| YBX1 | ZNF431   |
| YBX1 | ZNF444   |
| YBX1 | ZNF519   |
| YBX1 | ZNF526   |
| YBX1 | ZNF574   |
| YBX1 | ZNF584   |
| YBX1 | ZNF608   |
| YBX1 | ZNF672   |
| YBX1 | ZNF680   |
| YBX1 | ZNF687   |
| YBX1 | ZNF689   |
| YBX1 | ZNF711   |
| YBX1 | ZNF787   |
| YBX1 | ZNF8     |
| YBX1 | ZSCAN2   |
| YBX1 | ZSWIM1   |
| YBX1 | ZSWIM3   |
| YY1  | AAAS     |
| YY1  | AAMP     |
| YY1  | AARS2    |
| YY1  | AASDH    |
| YY1  | AASDHPPT |
| YY1  | AATF     |
| YY1  | ABCB7    |
| YY1  | ABCF1    |
| YY1  | ABHD11   |
| YY1  | ABHD17B  |
| YY1  | ABHD3    |
| YY1  | ABI1     |
| YY1  | ABI2     |
| YY1  | ABT1     |
| YY1  | ACAA1    |
| YY1  | ACAA2    |
| YY1  | ACADVL   |
| YY1  | ACAP2    |
| YY1  | ACAT2    |
| YY1  | ACBD3    |
| YY1  | ACBD4    |
| YY1  | ACD      |
| YY1  | ACIN1    |

|     |         |
|-----|---------|
| YY1 | ACLY    |
| YY1 | AC02    |
| YY1 | AC0T13  |
| YY1 | AC0T7   |
| YY1 | AC0T8   |
| YY1 | AC0T9   |
| YY1 | ACP5    |
| YY1 | ACSL1   |
| YY1 | ACSL3   |
| YY1 | ACSL4   |
| YY1 | ACSS1   |
| YY1 | ACTB    |
| YY1 | ACTG1   |
| YY1 | ACTL6A  |
| YY1 | ACTN4   |
| YY1 | ACTR1A  |
| YY1 | ACTR1B  |
| YY1 | ACTR2   |
| YY1 | ACTR3   |
| YY1 | ACTR3C  |
| YY1 | ACTR6   |
| YY1 | ACTR8   |
| YY1 | ADAM10  |
| YY1 | ADAM15  |
| YY1 | ADAM17  |
| YY1 | ADAM9   |
| YY1 | ADAR    |
| YY1 | ADAT1   |
| YY1 | ADD1    |
| YY1 | ADD3    |
| YY1 | ADH5    |
| YY1 | ADI1    |
| YY1 | ADIPOR1 |
| YY1 | ADK     |
| YY1 | ADO     |
| YY1 | ADPGK   |
| YY1 | ADPRHL2 |
| YY1 | ADRM1   |
| YY1 | ADSS    |
| YY1 | AEBP2   |
| YY1 | AES     |
| YY1 | AFF3    |
| YY1 | AFF4    |
| YY1 | AFTPH   |
| YY1 | AG03    |
| YY1 | AGPAT1  |
| YY1 | AGPAT2  |
| YY1 | AGPAT3  |
| YY1 | AGPS    |
| YY1 | AHCY    |

|     |          |
|-----|----------|
| YY1 | AHI1     |
| YY1 | AHNAK    |
| YY1 | AHR      |
| YY1 | AHSA1    |
| YY1 | AIDA     |
| YY1 | AIF1     |
| YY1 | AIFM1    |
| YY1 | AIFM2    |
| YY1 | AIM2     |
| YY1 | AIMP1    |
| YY1 | AIP      |
| YY1 | AK3      |
| YY1 | AKAP1    |
| YY1 | AKAP10   |
| YY1 | AKAP11   |
| YY1 | AKAP13   |
| YY1 | AKAP8    |
| YY1 | AKAP8L   |
| YY1 | AKAP9    |
| YY1 | AKIP1    |
| YY1 | AKIRIN1  |
| YY1 | AKIRIN2  |
| YY1 | AKR1B1   |
| YY1 | AKT2     |
| YY1 | AKTIP    |
| YY1 | ALDH4A1  |
| YY1 | ALDH6A1  |
| YY1 | ALDH9A1  |
| YY1 | ALDOA    |
| YY1 | ALG11    |
| YY1 | ALG13    |
| YY1 | ALG3     |
| YY1 | ALKBH5   |
| YY1 | ALPK1    |
| YY1 | ALYREF   |
| YY1 | AMD1     |
| YY1 | AMMECR1  |
| YY1 | ANAPC11  |
| YY1 | ANAPC15  |
| YY1 | ANAPC16  |
| YY1 | ANAPC5   |
| YY1 | ANAPC7   |
| YY1 | ANG      |
| YY1 | ANGPT2   |
| YY1 | ANKHD1   |
| YY1 | ANKLE2   |
| YY1 | ANKRD10  |
| YY1 | ANKRD11  |
| YY1 | ANKRD13A |
| YY1 | ANKRD26  |

|     |          |
|-----|----------|
| YY1 | ANKRD34B |
| YY1 | ANKRD46  |
| YY1 | ANKZF1   |
| YY1 | ANP32A   |
| YY1 | ANP32B   |
| YY1 | ANP32E   |
| YY1 | ANXA11   |
| YY1 | ANXA2    |
| YY1 | AP1AR    |
| YY1 | AP1B1    |
| YY1 | AP1S1    |
| YY1 | AP2B1    |
| YY1 | AP2M1    |
| YY1 | AP2S1    |
| YY1 | AP3B1    |
| YY1 | AP3D1    |
| YY1 | AP3S1    |
| YY1 | AP4B1    |
| YY1 | AP4E1    |
| YY1 | AP5B1    |
| YY1 | AP5M1    |
| YY1 | APEH     |
| YY1 | APEX2    |
| YY1 | APH1A    |
| YY1 | API5     |
| YY1 | APLP2    |
| YY1 | APOPT1   |
| YY1 | APPL1    |
| YY1 | APRT     |
| YY1 | APTX     |
| YY1 | ARAF     |
| YY1 | ARAP1    |
| YY1 | ARCN1    |
| YY1 | ARF1     |
| YY1 | ARF3     |
| YY1 | ARF5     |
| YY1 | ARF6     |
| YY1 | ARFGAP2  |
| YY1 | ARFGEF1  |
| YY1 | ARFIP2   |
| YY1 | ARG2     |
| YY1 | ARGLU1   |
| YY1 | ARHGAP12 |
| YY1 | ARHGAP19 |
| YY1 | ARHGAP22 |
| YY1 | ARHGAP24 |
| YY1 | ARHGAP25 |
| YY1 | ARHGAP30 |
| YY1 | ARHGAP4  |
| YY1 | ARHGAP5  |

|     |            |
|-----|------------|
| YY1 | ARHGDIA    |
| YY1 | ARHGDIB    |
| YY1 | ARHGEF1    |
| YY1 | ARID1A     |
| YY1 | ARID1B     |
| YY1 | ARID4A     |
| YY1 | ARID4B     |
| YY1 | ARID5A     |
| YY1 | ARID5B     |
| YY1 | ARL14EP    |
| YY1 | ARL2       |
| YY1 | ARL2BP     |
| YY1 | ARL3       |
| YY1 | ARL5A      |
| YY1 | ARL6IP1    |
| YY1 | ARL8A      |
| YY1 | ARMCX3     |
| YY1 | ARMCX5     |
| YY1 | ARMCX6     |
| YY1 | ARNT       |
| YY1 | ARPC1A     |
| YY1 | ARPC1B     |
| YY1 | ARPC2      |
| YY1 | ARPC3      |
| YY1 | ARPC4      |
| YY1 | ARPC5L     |
| YY1 | ARPP19     |
| YY1 | ARRDC3     |
| YY1 | ARRDC3-AS1 |
| YY1 | ARV1       |
| YY1 | ASB16-AS1  |
| YY1 | ASB2       |
| YY1 | ASB3       |
| YY1 | ASB7       |
| YY1 | ASB8       |
| YY1 | ASCC1      |
| YY1 | ASF1B      |
| YY1 | ASH1L      |
| YY1 | ASH1L-AS1  |
| YY1 | ASL        |
| YY1 | ASNA1      |
| YY1 | ASNSD1     |
| YY1 | ASPM       |
| YY1 | ASTE1      |
| YY1 | ASXL1      |
| YY1 | ATAD2      |
| YY1 | ATAD5      |
| YY1 | ATF1       |
| YY1 | ATF4       |
| YY1 | ATF7       |

|     |           |
|-----|-----------|
| YY1 | ATF7IP    |
| YY1 | ATF7IP2   |
| YY1 | ATG10     |
| YY1 | ATG101    |
| YY1 | ATG12     |
| YY1 | ATG3      |
| YY1 | ATG4B     |
| YY1 | ATG4D     |
| YY1 | ATG5      |
| YY1 | ATIC      |
| YY1 | ATL3      |
| YY1 | ATOX1     |
| YY1 | ATP11B    |
| YY1 | ATP13A3   |
| YY1 | ATP2A3    |
| YY1 | ATP2C1    |
| YY1 | ATP5S     |
| YY1 | ATP6V0D1  |
| YY1 | ATP6V0E1  |
| YY1 | ATP6V1A   |
| YY1 | ATP6V1C1  |
| YY1 | ATP6V1E1  |
| YY1 | ATP6V1F   |
| YY1 | ATP6V1G1  |
| YY1 | ATP6V1H   |
| YY1 | ATPAF2    |
| YY1 | ATRAID    |
| YY1 | ATRX      |
| YY1 | ATXN10    |
| YY1 | ATXN2     |
| YY1 | ATXN2L    |
| YY1 | ATXN3     |
| YY1 | ATXN7L3B  |
| YY1 | AUH       |
| YY1 | AURKAIP1  |
| YY1 | AZI2      |
| YY1 | AZIN1     |
| YY1 | AZIN1-AS1 |
| YY1 | B2M       |
| YY1 | B3GALNT1  |
| YY1 | B3GLCT    |
| YY1 | B9D2      |
| YY1 | BABAM1    |
| YY1 | BAG5      |
| YY1 | BAG6      |
| YY1 | BAK1      |
| YY1 | BANF1     |
| YY1 | BANP      |
| YY1 | BASP1     |
| YY1 | BAX       |

|     |              |
|-----|--------------|
| YY1 | BAZ1A        |
| YY1 | BAZ1B        |
| YY1 | BAZ2A        |
| YY1 | BAZ2B        |
| YY1 | BBIP1        |
| YY1 | BBX          |
| YY1 | BCAP29       |
| YY1 | BCAP31       |
| YY1 | BCAS2        |
| YY1 | BCAS3        |
| YY1 | BCCIP        |
| YY1 | BCKDHB       |
| YY1 | BCL10        |
| YY1 | BCL11A       |
| YY1 | BCL2L11      |
| YY1 | BCL2L13      |
| YY1 | BCL6         |
| YY1 | BCL7B        |
| YY1 | BCLAF1       |
| YY1 | BDH1         |
| YY1 | BDH2         |
| YY1 | BDP1         |
| YY1 | BEX1         |
| YY1 | BEX4         |
| YY1 | BFAR         |
| YY1 | BID          |
| YY1 | BIRC2        |
| YY1 | BIRC3        |
| YY1 | BIRC5        |
| YY1 | BIRC6        |
| YY1 | BLK          |
| YY1 | BLMH         |
| YY1 | BLOC1S1      |
| YY1 | BLOC1S2      |
| YY1 | BLOC1S5      |
| YY1 | BMF          |
| YY1 | BMP2K        |
| YY1 | BMP7         |
| YY1 | BMS1         |
| YY1 | BNIP2        |
| YY1 | BNIP3L       |
| YY1 | BOLA2-SMG1P6 |
| YY1 | BORCS6       |
| YY1 | BORCS7       |
| YY1 | BORCS8       |
| YY1 | BPHL         |
| YY1 | BPNT1        |
| YY1 | BPTF         |
| YY1 | BRAF         |
| YY1 | BRAP         |

|     |           |
|-----|-----------|
| YY1 | BRCA2     |
| YY1 | BRD1      |
| YY1 | BRD2      |
| YY1 | BRD4      |
| YY1 | BRD7      |
| YY1 | BRD9      |
| YY1 | BRI3BP    |
| YY1 | BRK1      |
| YY1 | BRMS1     |
| YY1 | BROX      |
| YY1 | BRWD1     |
| YY1 | BSDC1     |
| YY1 | BTF3      |
| YY1 | BTF3L4    |
| YY1 | BTG2      |
| YY1 | BTK       |
| YY1 | BUB3      |
| YY1 | BUD13     |
| YY1 | BUD31     |
| YY1 | BZW1      |
| YY1 | C11orf24  |
| YY1 | C11orf49  |
| YY1 | C11orf54  |
| YY1 | C11orf58  |
| YY1 | C11orf71  |
| YY1 | C12orf10  |
| YY1 | C12orf43  |
| YY1 | C12orf49  |
| YY1 | C12orf65  |
| YY1 | C12orf66  |
| YY1 | C12orf75  |
| YY1 | C14orf119 |
| YY1 | C15orf40  |
| YY1 | C16orf58  |
| YY1 | C16orf72  |
| YY1 | C16orf87  |
| YY1 | C17orf53  |
| YY1 | C17orf75  |
| YY1 | C18orf21  |
| YY1 | C18orf32  |
| YY1 | C19orf25  |
| YY1 | C19orf38  |
| YY1 | C19orf48  |
| YY1 | C19orf53  |
| YY1 | C19orf54  |
| YY1 | C19orf66  |
| YY1 | C19orf70  |
| YY1 | C1D       |
| YY1 | C1GALT1   |
| YY1 | C1orf123  |



|     |          |
|-----|----------|
| YY1 | C1orf131 |
| YY1 | C1orf174 |
| YY1 | C1orf43  |
| YY1 | C1orf52  |
| YY1 | C1QBP    |
| YY1 | C20orf27 |
| YY1 | C2orf42  |
| YY1 | C2orf49  |
| YY1 | C2orf69  |
| YY1 | C2orf74  |
| YY1 | C3orf38  |
| YY1 | C4orf46  |
| YY1 | C4orf48  |
| YY1 | C5orf24  |
| YY1 | C5orf34  |
| YY1 | C5orf51  |
| YY1 | C5orf63  |
| YY1 | C6orf106 |
| YY1 | C6orf48  |
| YY1 | C6orf62  |
| YY1 | C8orf59  |
| YY1 | C9orf16  |
| YY1 | C9orf78  |
| YY1 | CAB39    |
| YY1 | CABLES2  |
| YY1 | CACUL1   |
| YY1 | CACYBP   |
| YY1 | CALCOC02 |
| YY1 | CALM1    |
| YY1 | CALM2    |
| YY1 | CAMK1    |
| YY1 | CAMK2D   |
| YY1 | CAMKK2   |
| YY1 | CAMLG    |
| YY1 | CAMTA1   |
| YY1 | CAND1    |
| YY1 | CAP1     |
| YY1 | CAPN15   |
| YY1 | CAPNS1   |
| YY1 | CAPRIN1  |
| YY1 | CAPZA1   |
| YY1 | CAPZA2   |
| YY1 | CAPZB    |
| YY1 | CARHSP1  |
| YY1 | CARMIL2  |
| YY1 | CARS     |
| YY1 | CARS2    |
| YY1 | CASC3    |
| YY1 | CASC4    |
| YY1 | CASD1    |

|     |          |
|-----|----------|
| YY1 | CASP2    |
| YY1 | CASP3    |
| YY1 | CASP8AP2 |
| YY1 | CAST     |
| YY1 | CATSPER2 |
| YY1 | CBFB     |
| YY1 | CBR4     |
| YY1 | CBWD2    |
| YY1 | CBX1     |
| YY1 | CBX3     |
| YY1 | CBX5     |
| YY1 | CBX7     |
| YY1 | CC2D1A   |
| YY1 | CCAR1    |
| YY1 | CCAR2    |
| YY1 | CCDC115  |
| YY1 | CCDC117  |
| YY1 | CCDC12   |
| YY1 | CCDC124  |
| YY1 | CCDC137  |
| YY1 | CCDC142  |
| YY1 | CCDC150  |
| YY1 | CCDC174  |
| YY1 | CCDC186  |
| YY1 | CCDC189  |
| YY1 | CCDC22   |
| YY1 | CCDC25   |
| YY1 | CCDC28B  |
| YY1 | CCDC50   |
| YY1 | CCDC6    |
| YY1 | CCDC61   |
| YY1 | CCDC66   |
| YY1 | CCDC69   |
| YY1 | CCDC71   |
| YY1 | CCDC71L  |
| YY1 | CCDC84   |
| YY1 | CCDC88C  |
| YY1 | CCDC90B  |
| YY1 | CCNA2    |
| YY1 | CCNB1    |
| YY1 | CCNB1IP1 |
| YY1 | CCNB2    |
| YY1 | CCND3    |
| YY1 | CCNDBP1  |
| YY1 | CCNH     |
| YY1 | CCNI     |
| YY1 | CCNK     |
| YY1 | CCNL1    |
| YY1 | CCNL2    |
| YY1 | CCSAP    |

|     |          |
|-----|----------|
| YY1 | CCT2     |
| YY1 | CCT4     |
| YY1 | CCT5     |
| YY1 | CCT6A    |
| YY1 | CCT7     |
| YY1 | CCT8     |
| YY1 | CCZ1     |
| YY1 | CD164    |
| YY1 | CD2BP2   |
| YY1 | CD40     |
| YY1 | CD47     |
| YY1 | CD59     |
| YY1 | CD68     |
| YY1 | CD79B    |
| YY1 | CDC123   |
| YY1 | CDC16    |
| YY1 | CDC20    |
| YY1 | CDC25A   |
| YY1 | CDC26    |
| YY1 | CDC27    |
| YY1 | CDC37    |
| YY1 | CDC40    |
| YY1 | CDC42    |
| YY1 | CDC42SE2 |
| YY1 | CDC45    |
| YY1 | CDC5L    |
| YY1 | CDC7     |
| YY1 | CDC73    |
| YY1 | CDCA2    |
| YY1 | CDCA4    |
| YY1 | CDCA7    |
| YY1 | CDCA7L   |
| YY1 | CDK10    |
| YY1 | CDK11B   |
| YY1 | CDK12    |
| YY1 | CDK13    |
| YY1 | CDK14    |
| YY1 | CDK16    |
| YY1 | CDK17    |
| YY1 | CDK2     |
| YY1 | CDK2AP2  |
| YY1 | CDK5RAP2 |
| YY1 | CDK5RAP3 |
| YY1 | CDK9     |
| YY1 | CDKAL1   |
| YY1 | CDKN2D   |
| YY1 | CDS2     |
| YY1 | CDT1     |
| YY1 | CDV3     |
| YY1 | CEBPZOS  |

|     |        |
|-----|--------|
| YY1 | CELF1  |
| YY1 | CENPE  |
| YY1 | CENPF  |
| YY1 | CENPH  |
| YY1 | CENPM  |
| YY1 | CENPN  |
| YY1 | CENPQ  |
| YY1 | CENPT  |
| YY1 | CENPU  |
| YY1 | CEP104 |
| YY1 | CEP164 |
| YY1 | CEP19  |
| YY1 | CEP295 |
| YY1 | CEP55  |
| YY1 | CEP57  |
| YY1 | CEP63  |
| YY1 | CEP72  |
| YY1 | CEP76  |
| YY1 | CEP78  |
| YY1 | CEPT1  |
| YY1 | CERS5  |
| YY1 | CETN2  |
| YY1 | CFAP20 |
| YY1 | CFDP1  |
| YY1 | CFL1   |
| YY1 | CGGBP1 |
| YY1 | CGRRF1 |
| YY1 | CHAC2  |
| YY1 | CHAF1A |
| YY1 | CHAF1B |
| YY1 | CHAMP1 |
| YY1 | CHCHD1 |
| YY1 | CHCHD2 |
| YY1 | CHCHD3 |
| YY1 | CHCHD5 |
| YY1 | CHD3   |
| YY1 | CHD4   |
| YY1 | CHD8   |
| YY1 | CHD9   |
| YY1 | CHFR   |
| YY1 | CHKA   |
| YY1 | CHM    |
| YY1 | CHMP1A |
| YY1 | CHMP1B |
| YY1 | CHMP2A |
| YY1 | CHMP2B |
| YY1 | CHMP3  |
| YY1 | CHMP4B |
| YY1 | CHMP5  |
| YY1 | CHMP7  |

|     |        |
|-----|--------|
| YY1 | CHRAC1 |
| YY1 | CHTF18 |
| YY1 | CHTF8  |
| YY1 | CHTOP  |
| YY1 | CHURC1 |
| YY1 | CIA01  |
| YY1 | CIB1   |
| YY1 | CIB2   |
| YY1 | CINP   |
| YY1 | CIR1   |
| YY1 | CIRBP  |
| YY1 | CISD2  |
| YY1 | CKAP2L |
| YY1 | CKS1B  |
| YY1 | CKS2   |
| YY1 | CLASRP |
| YY1 | CLCN7  |
| YY1 | CLIC4  |
| YY1 | CLINT1 |
| YY1 | CLK1   |
| YY1 | CLK3   |
| YY1 | CLK4   |
| YY1 | CLNS1A |
| YY1 | CLPP   |
| YY1 | CLPTM1 |
| YY1 | CLPX   |
| YY1 | CLSPN  |
| YY1 | CLTA   |
| YY1 | CLTB   |
| YY1 | CLTC   |
| YY1 | CMC1   |
| YY1 | CMC2   |
| YY1 | CMPK1  |
| YY1 | CMTM6  |
| YY1 | CNBP   |
| YY1 | CNDP2  |
| YY1 | CNIH1  |
| YY1 | CNIH3  |
| YY1 | CNN2   |
| YY1 | CN0T1  |
| YY1 | CN0T10 |
| YY1 | CN0T11 |
| YY1 | CN0T2  |
| YY1 | CN0T3  |
| YY1 | CN0T6  |
| YY1 | CN0T7  |
| YY1 | CN0T8  |
| YY1 | CNP    |
| YY1 | CNPPD1 |
| YY1 | CNPY3  |

|     |          |
|-----|----------|
| YY1 | CNR1     |
| YY1 | COA4     |
| YY1 | COA6     |
| YY1 | COASY    |
| YY1 | COG2     |
| YY1 | COG3     |
| YY1 | COIL     |
| YY1 | COL4A3BP |
| YY1 | COMMD1   |
| YY1 | COMMD2   |
| YY1 | COMMD4   |
| YY1 | COMMD5   |
| YY1 | COMMD6   |
| YY1 | COMMD7   |
| YY1 | COMMD8   |
| YY1 | COPA     |
| YY1 | COPB1    |
| YY1 | COPB2    |
| YY1 | COPE     |
| YY1 | COPS2    |
| YY1 | COPS3    |
| YY1 | COPS4    |
| YY1 | COPS5    |
| YY1 | COPS6    |
| YY1 | COPS7B   |
| YY1 | COPS9    |
| YY1 | COPZ1    |
| YY1 | COQ10A   |
| YY1 | COQ2     |
| YY1 | COQ5     |
| YY1 | COQ6     |
| YY1 | COQ9     |
| YY1 | COR01A   |
| YY1 | COR01B   |
| YY1 | COTL1    |
| YY1 | COX11    |
| YY1 | COX14    |
| YY1 | COX15    |
| YY1 | COX17    |
| YY1 | COX18    |
| YY1 | COX20    |
| YY1 | COX4I1   |
| YY1 | COX5A    |
| YY1 | COX5B    |
| YY1 | COX6A1   |
| YY1 | COX6B1   |
| YY1 | COX7A2L  |
| YY1 | COX7B    |
| YY1 | COX7C    |
| YY1 | COX8A    |

|     |         |
|-----|---------|
| YY1 | CPNE1   |
| YY1 | CPNE2   |
| YY1 | CPNE3   |
| YY1 | CPSF2   |
| YY1 | CPSF3   |
| YY1 | CPSF4   |
| YY1 | CPSF6   |
| YY1 | CPSF7   |
| YY1 | CRBN    |
| YY1 | CREB1   |
| YY1 | CREM    |
| YY1 | CRK     |
| YY1 | CRKL    |
| YY1 | CRYZL1  |
| YY1 | CS      |
| YY1 | CSDE1   |
| YY1 | CSE1L   |
| YY1 | CSK     |
| YY1 | CSNK1A1 |
| YY1 | CSNK1D  |
| YY1 | CSNK1G2 |
| YY1 | CSNK2A1 |
| YY1 | CSNK2B  |
| YY1 | CSTF1   |
| YY1 | CSTF2   |
| YY1 | CSTF3   |
| YY1 | CTCF    |
| YY1 | CTDNEP1 |
| YY1 | CTDSP1  |
| YY1 | CTDSPL2 |
| YY1 | CTNNAL1 |
| YY1 | CTNNBL1 |
| YY1 | CTPS2   |
| YY1 | CTR9    |
| YY1 | CTSH    |
| YY1 | CTSZ    |
| YY1 | CUEDC2  |
| YY1 | CUL1    |
| YY1 | CUL4B   |
| YY1 | CUL5    |
| YY1 | CUTC    |
| YY1 | CUX1    |
| YY1 | CWC15   |
| YY1 | CWC22   |
| YY1 | CWC25   |
| YY1 | CWC27   |
| YY1 | CWF19L2 |
| YY1 | CXCR4   |
| YY1 | CXCR5   |
| YY1 | CXorf56 |

|     |          |
|-----|----------|
| YY1 | CXXC1    |
| YY1 | CXXC5    |
| YY1 | CYB561A3 |
| YY1 | CYB561D2 |
| YY1 | CYB5B    |
| YY1 | CYB5R4   |
| YY1 | CYC1     |
| YY1 | CYSLTR1  |
| YY1 | CYSTM1   |
| YY1 | CYTH1    |
| YY1 | DALRD3   |
| YY1 | DAP      |
| YY1 | DAP3     |
| YY1 | DAPK3    |
| YY1 | DAPP1    |
| YY1 | DARS     |
| YY1 | DAXX     |
| YY1 | DAZAP1   |
| YY1 | DAZAP2   |
| YY1 | DBF4     |
| YY1 | DBI      |
| YY1 | DBNL     |
| YY1 | DCAF11   |
| YY1 | DCAF12   |
| YY1 | DCAF13   |
| YY1 | DCAF7    |
| YY1 | DCAF8    |
| YY1 | DCK      |
| YY1 | DCLRE1C  |
| YY1 | DCP2     |
| YY1 | DCTN5    |
| YY1 | DCTN6    |
| YY1 | DCTPP1   |
| YY1 | DCUN1D1  |
| YY1 | DCUN1D5  |
| YY1 | DDA1     |
| YY1 | DDB1     |
| YY1 | DDB2     |
| YY1 | DDHD1    |
| YY1 | DDIAS    |
| YY1 | DDT      |
| YY1 | DDX1     |
| YY1 | DDX17    |
| YY1 | DDX19A   |
| YY1 | DDX19B   |
| YY1 | DDX23    |
| YY1 | DDX24    |
| YY1 | DDX27    |
| YY1 | DDX39A   |
| YY1 | DDX39B   |



|     |         |
|-----|---------|
| YY1 | DDX3X   |
| YY1 | DDX3Y   |
| YY1 | DDX42   |
| YY1 | DDX46   |
| YY1 | DDX5    |
| YY1 | DDX52   |
| YY1 | DDX56   |
| YY1 | DDX6    |
| YY1 | DECR1   |
| YY1 | DEDD    |
| YY1 | DEGS1   |
| YY1 | DEK     |
| YY1 | DENND2D |
| YY1 | DENND4A |
| YY1 | DENND4B |
| YY1 | DENR    |
| YY1 | DEPDC1  |
| YY1 | DEPDC5  |
| YY1 | DEPTOR  |
| YY1 | DESI2   |
| YY1 | DET1    |
| YY1 | DFFA    |
| YY1 | DGCR8   |
| YY1 | DGUOK   |
| YY1 | DHFR    |
| YY1 | DHODH   |
| YY1 | DHPS    |
| YY1 | DHRS7B  |
| YY1 | DHX15   |
| YY1 | DHX30   |
| YY1 | DHX36   |
| YY1 | DHX38   |
| YY1 | DHX40   |
| YY1 | DHX8    |
| YY1 | DHX9    |
| YY1 | DICER1  |
| YY1 | DIS3    |
| YY1 | DLD     |
| YY1 | DLG1    |
| YY1 | DLGAP5  |
| YY1 | DLST    |
| YY1 | DMAP1   |
| YY1 | DMD     |
| YY1 | DNAJA1  |
| YY1 | DNAJA3  |
| YY1 | DNAJB1  |
| YY1 | DNAJB12 |
| YY1 | DNAJB14 |
| YY1 | DNAJB2  |
| YY1 | DNAJB6  |

|     |          |
|-----|----------|
| YY1 | DNAJC21  |
| YY1 | DNAJC7   |
| YY1 | DNAJC8   |
| YY1 | DNAJC9   |
| YY1 | DNAL4    |
| YY1 | DNASE1   |
| YY1 | DNM1L    |
| YY1 | DNMBP    |
| YY1 | DNMT1    |
| YY1 | DNTTIP2  |
| YY1 | DOCK2    |
| YY1 | DOCK7    |
| YY1 | DOCK8    |
| YY1 | DOK1     |
| YY1 | DOK2     |
| YY1 | DONSON   |
| YY1 | DPCD     |
| YY1 | DPF2     |
| YY1 | DPH3     |
| YY1 | DPH5     |
| YY1 | DPP3     |
| YY1 | DPP8     |
| YY1 | DPY30    |
| YY1 | DPYSL2   |
| YY1 | DR1      |
| YY1 | DRG1     |
| YY1 | DRG2     |
| YY1 | DSCC1    |
| YY1 | DTD1     |
| YY1 | DTL      |
| YY1 | DTNBP1   |
| YY1 | DTX1     |
| YY1 | DTYMK    |
| YY1 | DUS1L    |
| YY1 | DUS3L    |
| YY1 | DUSP1    |
| YY1 | DUSP11   |
| YY1 | DUSP14   |
| YY1 | DUT      |
| YY1 | DYM      |
| YY1 | DYNC1H1  |
| YY1 | DYNC1I2  |
| YY1 | DYNC1LI2 |
| YY1 | DYNLT1   |
| YY1 | DZIP3    |
| YY1 | E2F1     |
| YY1 | E2F3     |
| YY1 | E2F4     |
| YY1 | EAPP     |
| YY1 | EARS2    |

|     |         |
|-----|---------|
| YY1 | EBAG9   |
| YY1 | EBP     |
| YY1 | ECE1    |
| YY1 | ECSIT   |
| YY1 | EDF1    |
| YY1 | EDRF1   |
| YY1 | EEA1    |
| YY1 | EED     |
| YY1 | EEF1A1  |
| YY1 | EEF1B2  |
| YY1 | EEF1D   |
| YY1 | EEF1G   |
| YY1 | EEF2    |
| YY1 | EFCAB14 |
| YY1 | EFTUD2  |
| YY1 | EGLN2   |
| YY1 | EHD1    |
| YY1 | EHD4    |
| YY1 | EID1    |
| YY1 | EID2    |
| YY1 | EIF1    |
| YY1 | EIF1AD  |
| YY1 | EIF1AX  |
| YY1 | EIF1AY  |
| YY1 | EIF1B   |
| YY1 | EIF2A   |
| YY1 | EIF2AK1 |
| YY1 | EIF2AK2 |
| YY1 | EIF2B1  |
| YY1 | EIF2B2  |
| YY1 | EIF2B5  |
| YY1 | EIF2S1  |
| YY1 | EIF2S2  |
| YY1 | EIF2S3  |
| YY1 | EIF3A   |
| YY1 | EIF3B   |
| YY1 | EIF3D   |
| YY1 | EIF3E   |
| YY1 | EIF3F   |
| YY1 | EIF3G   |
| YY1 | EIF3H   |
| YY1 | EIF3I   |
| YY1 | EIF3K   |
| YY1 | EIF3L   |
| YY1 | EIF3M   |
| YY1 | EIF4A2  |
| YY1 | EIF4A3  |
| YY1 | EIF4B   |
| YY1 | EIF4E   |
| YY1 | EIF4E2  |

|     |              |
|-----|--------------|
| YY1 | EIF4EBP2     |
| YY1 | EIF4G1       |
| YY1 | EIF4G2       |
| YY1 | EIF4H        |
| YY1 | EIF5         |
| YY1 | EIF5A2       |
| YY1 | EIF5B        |
| YY1 | EIF6         |
| YY1 | ELAC1        |
| YY1 | ELAC2        |
| YY1 | ELF1         |
| YY1 | ELK4         |
| YY1 | ELOF1        |
| YY1 | ELOVL5       |
| YY1 | ELP2         |
| YY1 | ELP5         |
| YY1 | ELP6         |
| YY1 | EMB          |
| YY1 | EMC10        |
| YY1 | EMC4         |
| YY1 | EMC6         |
| YY1 | EMC9         |
| YY1 | EMD          |
| YY1 | EME1         |
| YY1 | ENDOV        |
| YY1 | EN01         |
| YY1 | ENOPH1       |
| YY1 | ENOX2        |
| YY1 | ENSA         |
| YY1 | ENY2         |
| YY1 | EPB41        |
| YY1 | EPB41L4A-AS1 |
| YY1 | EPB41L5      |
| YY1 | EPC1         |
| YY1 | EPRS         |
| YY1 | EPS15        |
| YY1 | ERBIN        |
| YY1 | ERCC1        |
| YY1 | ERCC3        |
| YY1 | ERH          |
| YY1 | ERI1         |
| YY1 | ERI2         |
| YY1 | ERLIN1       |
| YY1 | ERP44        |
| YY1 | ESC01        |
| YY1 | ESC02        |
| YY1 | ESD          |
| YY1 | ETFB         |
| YY1 | ETS1         |
| YY1 | EVI5         |

|     |          |
|-----|----------|
| YY1 | EWSR1    |
| YY1 | EX05     |
| YY1 | EX0C1    |
| YY1 | EX0C5    |
| YY1 | EX0SC10  |
| YY1 | EX0SC2   |
| YY1 | EX0SC3   |
| YY1 | EX0SC4   |
| YY1 | EX0SC6   |
| YY1 | EX0SC9   |
| YY1 | EYA3     |
| YY1 | EZH2     |
| YY1 | EZR      |
| YY1 | FAAP20   |
| YY1 | FABP5    |
| YY1 | FAF1     |
| YY1 | FAF2     |
| YY1 | FAIM     |
| YY1 | FAM104A  |
| YY1 | FAM107B  |
| YY1 | FAM111A  |
| YY1 | FAM120A  |
| YY1 | FAM122B  |
| YY1 | FAM133B  |
| YY1 | FAM136A  |
| YY1 | FAM13B   |
| YY1 | FAM173A  |
| YY1 | FAM177A1 |
| YY1 | FAM185A  |
| YY1 | FAM192A  |
| YY1 | FAM199X  |
| YY1 | FAM204A  |
| YY1 | FAM208A  |
| YY1 | FAM20B   |
| YY1 | FAM219B  |
| YY1 | FAM222B  |
| YY1 | FAM24B   |
| YY1 | FAM32A   |
| YY1 | FAM3A    |
| YY1 | FAM49B   |
| YY1 | FAM50A   |
| YY1 | FAM76B   |
| YY1 | FAM78A   |
| YY1 | FAM91A1  |
| YY1 | FAM96A   |
| YY1 | FAM96B   |
| YY1 | FANCE    |
| YY1 | FASTK    |
| YY1 | FAU      |
| YY1 | FBL      |

|     |          |
|-----|----------|
| YY1 | FBRS     |
| YY1 | FBRSL1   |
| YY1 | FBXL3    |
| YY1 | FBXL5    |
| YY1 | FBX011   |
| YY1 | FBX021   |
| YY1 | FBX025   |
| YY1 | FBX030   |
| YY1 | FBX034   |
| YY1 | FBX07    |
| YY1 | FBX09    |
| YY1 | FBXW2    |
| YY1 | FBXW4    |
| YY1 | FBXW5    |
| YY1 | FBXW9    |
| YY1 | FCF1     |
| YY1 | FDFT1    |
| YY1 | FDPS     |
| YY1 | FEM1A    |
| YY1 | FEN1     |
| YY1 | FERMT3   |
| YY1 | FGD5-AS1 |
| YY1 | FGFR10P  |
| YY1 | FGFR10P2 |
| YY1 | FHIT     |
| YY1 | FIBP     |
| YY1 | FICD     |
| YY1 | FIP1L1   |
| YY1 | FIS1     |
| YY1 | FKBP1A   |
| YY1 | FKBP3    |
| YY1 | FKBP5    |
| YY1 | FKBP8    |
| YY1 | FLAD1    |
| YY1 | FLI1     |
| YY1 | FLII     |
| YY1 | FLNA     |
| YY1 | FLNB     |
| YY1 | FLOT1    |
| YY1 | FMR1     |
| YY1 | FN3KRP   |
| YY1 | FNBP1    |
| YY1 | FNBP4    |
| YY1 | FNIP1    |
| YY1 | FNTA     |
| YY1 | FOPNL    |
| YY1 | FOXK2    |
| YY1 | FOXK1    |
| YY1 | FOXO1    |
| YY1 | FOXP1    |

|     |            |
|-----|------------|
| YY1 | FRA10AC1   |
| YY1 | FRAT2      |
| YY1 | FRG1       |
| YY1 | FTH1       |
| YY1 | FUBP1      |
| YY1 | FUCA1      |
| YY1 | FUS        |
| YY1 | FUT11      |
| YY1 | FUZ        |
| YY1 | FXR1       |
| YY1 | FXR2       |
| YY1 | FYTTD1     |
| YY1 | FZD3       |
| YY1 | G2E3       |
| YY1 | G3BP1      |
| YY1 | G3BP2      |
| YY1 | G6PC3      |
| YY1 | G6PD       |
| YY1 | GABARAP    |
| YY1 | GABARAPL2  |
| YY1 | GABPA      |
| YY1 | GADD45GIP1 |
| YY1 | GANAB      |
| YY1 | GAPDH      |
| YY1 | GAPVD1     |
| YY1 | GART       |
| YY1 | GAS2L3     |
| YY1 | GATAD2A    |
| YY1 | GATAD2B    |
| YY1 | GATB       |
| YY1 | GBA        |
| YY1 | GBF1       |
| YY1 | GCA        |
| YY1 | GCC2       |
| YY1 | GCDH       |
| YY1 | GCHFR      |
| YY1 | GCNT2      |
| YY1 | GDI1       |
| YY1 | GDI2       |
| YY1 | GEMIN4     |
| YY1 | GEMIN7     |
| YY1 | GEMIN8     |
| YY1 | GFER       |
| YY1 | GFOD2      |
| YY1 | GGA1       |
| YY1 | GGCT       |
| YY1 | GGNBP2     |
| YY1 | GHITM      |
| YY1 | GID8       |
| YY1 | GIGYF2     |

|     |          |
|-----|----------|
| YY1 | GIMAP2   |
| YY1 | GIN1     |
| YY1 | GINM1    |
| YY1 | GINS2    |
| YY1 | GINS3    |
| YY1 | GIPC1    |
| YY1 | GJC1     |
| YY1 | GLA      |
| YY1 | GLE1     |
| YY1 | GL01     |
| YY1 | GLOD4    |
| YY1 | GLRX3    |
| YY1 | GLRX5    |
| YY1 | GLS      |
| YY1 | GLTP     |
| YY1 | GLUL     |
| YY1 | GLYCTK   |
| YY1 | GLYR1    |
| YY1 | GMCL1    |
| YY1 | GMEB2    |
| YY1 | GMFB     |
| YY1 | GMNN     |
| YY1 | GMPR2    |
| YY1 | GNAI2    |
| YY1 | GNAI3    |
| YY1 | GNAS     |
| YY1 | GNB1     |
| YY1 | GNB2     |
| YY1 | GNB4     |
| YY1 | GNB5     |
| YY1 | GNG5     |
| YY1 | GNGT2    |
| YY1 | GNL1     |
| YY1 | GNPAT    |
| YY1 | GNPTG    |
| YY1 | GOLGA4   |
| YY1 | GOLGA7   |
| YY1 | GON4L    |
| YY1 | GOPC     |
| YY1 | GORASP2  |
| YY1 | GOT1     |
| YY1 | GOT2     |
| YY1 | GPALPP1  |
| YY1 | GPANK1   |
| YY1 | GPAT4    |
| YY1 | GPATCH1  |
| YY1 | GPATCH2  |
| YY1 | GPATCH2L |
| YY1 | GPATCH8  |
| YY1 | GPBP1    |



|     |         |
|-----|---------|
| YY1 | GPBP1L1 |
| YY1 | GPCPD1  |
| YY1 | GPI     |
| YY1 | GPM6B   |
| YY1 | GPN2    |
| YY1 | GPR137  |
| YY1 | GPS1    |
| YY1 | GPX4    |
| YY1 | GRAMD1C |
| YY1 | GRAP2   |
| YY1 | GRB2    |
| YY1 | GRINA   |
| YY1 | GSDMD   |
| YY1 | GSKIP   |
| YY1 | GSPT1   |
| YY1 | GSTO1   |
| YY1 | GSTP1   |
| YY1 | GSTZ1   |
| YY1 | GTDC1   |
| YY1 | GTF2A2  |
| YY1 | GTF2B   |
| YY1 | GTF2E2  |
| YY1 | GTF2F1  |
| YY1 | GTF2F2  |
| YY1 | GTF2H5  |
| YY1 | GTF2I   |
| YY1 | GTF3A   |
| YY1 | GTF3C1  |
| YY1 | GTF3C3  |
| YY1 | GTF3C5  |
| YY1 | GTF3C6  |
| YY1 | GTPBP2  |
| YY1 | GTPBP3  |
| YY1 | GTSE1   |
| YY1 | GUCD1   |
| YY1 | GUK1    |
| YY1 | GYG1    |
| YY1 | GZF1    |
| YY1 | H2AFV   |
| YY1 | H2AFY   |
| YY1 | H2AFZ   |
| YY1 | H3F3A   |
| YY1 | H3F3B   |
| YY1 | H6PD    |
| YY1 | HACD2   |
| YY1 | HACD3   |
| YY1 | HADHA   |
| YY1 | HADHB   |
| YY1 | HARS2   |
| YY1 | HAT1    |

|     |          |
|-----|----------|
| YY1 | HAUS5    |
| YY1 | HAUS7    |
| YY1 | HAX1     |
| YY1 | HBS1L    |
| YY1 | HCFC2    |
| YY1 | HCLS1    |
| YY1 | HDAC1    |
| YY1 | HDAC2    |
| YY1 | HDAC3    |
| YY1 | HDAC5    |
| YY1 | HDAC7    |
| YY1 | HDAC9    |
| YY1 | HDDC2    |
| YY1 | HDGF     |
| YY1 | HDLBP    |
| YY1 | HEBP2    |
| YY1 | HECA     |
| YY1 | HECTD1   |
| YY1 | HELLS    |
| YY1 | HELZ     |
| YY1 | HENMT1   |
| YY1 | HERC1    |
| YY1 | HERC2    |
| YY1 | HERC4    |
| YY1 | HES1     |
| YY1 | HGS      |
| YY1 | HIBADH   |
| YY1 | HIF1A    |
| YY1 | HIGD1A   |
| YY1 | HIGD2A   |
| YY1 | HINT1    |
| YY1 | HINT2    |
| YY1 | HIST1H4D |
| YY1 | HK1      |
| YY1 | HKR1     |
| YY1 | HLA-DMB  |
| YY1 | HLA-DPA1 |
| YY1 | HLA-DRA  |
| YY1 | HLA-E    |
| YY1 | HMG20B   |
| YY1 | HMGA1    |
| YY1 | HMGB1    |
| YY1 | HMGB2    |
| YY1 | HMGCL    |
| YY1 | HMGN2    |
| YY1 | HMGN3    |
| YY1 | HMGXB3   |
| YY1 | HMGXB4   |
| YY1 | HMMR     |
| YY1 | HMOX2    |

|     |           |
|-----|-----------|
| YY1 | HNRNPA0   |
| YY1 | HNRNPA1   |
| YY1 | HNRNPA2B1 |
| YY1 | HNRNPA3   |
| YY1 | HNRNPAB   |
| YY1 | HNRNPC    |
| YY1 | HNRNPD    |
| YY1 | HNRNPF    |
| YY1 | HNRNPH1   |
| YY1 | HNRNPH2   |
| YY1 | HNRNPH3   |
| YY1 | HNRNPK    |
| YY1 | HNRNPL    |
| YY1 | HNRNPM    |
| YY1 | HNRNPR    |
| YY1 | HNRNPU    |
| YY1 | HOMEZ     |
| YY1 | H00K2     |
| YY1 | H00K3     |
| YY1 | H0TAIRM1  |
| YY1 | HP1BP3    |
| YY1 | HPCAL1    |
| YY1 | HPF1      |
| YY1 | HPRT1     |
| YY1 | HPS1      |
| YY1 | HPS6      |
| YY1 | HSBP1     |
| YY1 | HSD17B10  |
| YY1 | HSF1      |
| YY1 | HSF2      |
| YY1 | HSP90AA1  |
| YY1 | HSPA14    |
| YY1 | HSPA1A    |
| YY1 | HSPA1B    |
| YY1 | HSPA4     |
| YY1 | HSPA8     |
| YY1 | HSPB11    |
| YY1 | HSPBP1    |
| YY1 | HSPD1     |
| YY1 | HSPE1     |
| YY1 | HSPH1     |
| YY1 | HTATIP2   |
| YY1 | HTRA2     |
| YY1 | HTT       |
| YY1 | HUWE1     |
| YY1 | IARS      |
| YY1 | ICMT      |
| YY1 | ICOSLG    |
| YY1 | ID3       |
| YY1 | IDH3A     |

|     |          |
|-----|----------|
| YY1 | IDH3B    |
| YY1 | IER3IP1  |
| YY1 | IFI16    |
| YY1 | IFNGR2   |
| YY1 | IFT20    |
| YY1 | IFT22    |
| YY1 | IFT57    |
| YY1 | IFT74    |
| YY1 | IGBP1    |
| YY1 | IGF2BP1  |
| YY1 | IGF2R    |
| YY1 | IKBKE    |
| YY1 | IKBKG    |
| YY1 | IKZF1    |
| YY1 | IKZF3    |
| YY1 | IL15RA   |
| YY1 | IL16     |
| YY1 | IL2RG    |
| YY1 | ILF2     |
| YY1 | ILF3     |
| YY1 | ILKAP    |
| YY1 | ILVBL    |
| YY1 | IMMT     |
| YY1 | IMP3     |
| YY1 | IMP4     |
| YY1 | IMPDH2   |
| YY1 | INCENP   |
| YY1 | ING5     |
| YY1 | INIP     |
| YY1 | IN080    |
| YY1 | IN080C   |
| YY1 | IN080E   |
| YY1 | INPP5K   |
| YY1 | INTS1    |
| YY1 | INTS10   |
| YY1 | INTS4    |
| YY1 | INTS7    |
| YY1 | IP6K1    |
| YY1 | IP6K2    |
| YY1 | IP011    |
| YY1 | IP05     |
| YY1 | IP09     |
| YY1 | IPPK     |
| YY1 | IQCG     |
| YY1 | IQGAP1   |
| YY1 | IRAK1    |
| YY1 | IRAK1BP1 |
| YY1 | IREB2    |
| YY1 | IRF1     |
| YY1 | IRF2     |

|     |            |
|-----|------------|
| YY1 | IRF8       |
| YY1 | ISCU       |
| YY1 | ISG20L2    |
| YY1 | ISL2       |
| YY1 | IST1       |
| YY1 | ISY1       |
| YY1 | ITGB1      |
| YY1 | ITGB1BP1   |
| YY1 | ITGB3BP    |
| YY1 | ITPA       |
| YY1 | ITPK1      |
| YY1 | ITPKB      |
| YY1 | ITPRIPL1   |
| YY1 | ITSN2      |
| YY1 | JADE1      |
| YY1 | JAK1       |
| YY1 | JAML       |
| YY1 | JAZF1      |
| YY1 | JKAMP      |
| YY1 | JMJD1C     |
| YY1 | JOSD1      |
| YY1 | JPX        |
| YY1 | JTB        |
| YY1 | JUND       |
| YY1 | KANSL1-AS1 |
| YY1 | KANSL2     |
| YY1 | KARS       |
| YY1 | KAT14      |
| YY1 | KAT6A      |
| YY1 | KAT6B      |
| YY1 | KATNA1     |
| YY1 | KATNAL1    |
| YY1 | KATNB1     |
| YY1 | KCMF1      |
| YY1 | KCNG1      |
| YY1 | KCNQ10T1   |
| YY1 | KCTD10     |
| YY1 | KCTD18     |
| YY1 | KCTD5      |
| YY1 | KDM2A      |
| YY1 | KDM2B      |
| YY1 | KDM3B      |
| YY1 | KHDRBS1    |
| YY1 | KIAA0355   |
| YY1 | KIAA1191   |
| YY1 | KIAA1551   |
| YY1 | KIF14      |
| YY1 | KIF20A     |
| YY1 | KIF20B     |
| YY1 | KIF23      |

|     |         |
|-----|---------|
| YY1 | KIF2A   |
| YY1 | KIF4A   |
| YY1 | KIF5B   |
| YY1 | KLC1    |
| YY1 | KLF6    |
| YY1 | KLHDC3  |
| YY1 | KLHDC4  |
| YY1 | KLHL2   |
| YY1 | KLHL24  |
| YY1 | KLHL42  |
| YY1 | KLHL5   |
| YY1 | KLHL7   |
| YY1 | KLHL9   |
| YY1 | KMT2A   |
| YY1 | KMT2B   |
| YY1 | KMT2C   |
| YY1 | KMT2E   |
| YY1 | KMT5A   |
| YY1 | KMT5B   |
| YY1 | KMT5C   |
| YY1 | KNTC1   |
| YY1 | KPNA3   |
| YY1 | KPNB1   |
| YY1 | KRAS    |
| YY1 | KRCC1   |
| YY1 | KRIT1   |
| YY1 | KRR1    |
| YY1 | KTN1    |
| YY1 | KXD1    |
| YY1 | KYAT3   |
| YY1 | L3MBTL2 |
| YY1 | LACTB2  |
| YY1 | LAGE3   |
| YY1 | LAMTOR1 |
| YY1 | LAMTOR3 |
| YY1 | LAMTOR4 |
| YY1 | LAMTOR5 |
| YY1 | LARP4   |
| YY1 | LARP7   |
| YY1 | LARS    |
| YY1 | LAS1L   |
| YY1 | LBR     |
| YY1 | LCOR    |
| YY1 | LCORL   |
| YY1 | LCP1    |
| YY1 | LDHA    |
| YY1 | LDHB    |
| YY1 | LGMN    |
| YY1 | LIAS    |
| YY1 | LIMA1   |

|     |           |
|-----|-----------|
| YY1 | LINC00467 |
| YY1 | LINC00476 |
| YY1 | LINC00623 |
| YY1 | LINC00663 |
| YY1 | LIPE      |
| YY1 | LITAF     |
| YY1 | LLPH      |
| YY1 | LMF1      |
| YY1 | LNPEP     |
| YY1 | LONP1     |
| YY1 | LONP2     |
| YY1 | LOXL2     |
| YY1 | LPAR2     |
| YY1 | LPIN2     |
| YY1 | LPP-AS2   |
| YY1 | LPXN      |
| YY1 | LRIF1     |
| YY1 | LRPPRC    |
| YY1 | LRR1      |
| YY1 | LRRC37B   |
| YY1 | LRRC41    |
| YY1 | LRRC47    |
| YY1 | LRRC58    |
| YY1 | LRRFIP1   |
| YY1 | LRRFIP2   |
| YY1 | LRSAM1    |
| YY1 | LSM1      |
| YY1 | LSM12     |
| YY1 | LSM14A    |
| YY1 | LSM2      |
| YY1 | LSM3      |
| YY1 | LSM4      |
| YY1 | LSM5      |
| YY1 | LSM6      |
| YY1 | LSP1      |
| YY1 | LTA4H     |
| YY1 | LTBP1     |
| YY1 | LUC7L     |
| YY1 | LUC7L2    |
| YY1 | LUC7L3    |
| YY1 | LUZP1     |
| YY1 | LYN       |
| YY1 | LYPLA1    |
| YY1 | LYPLA2    |
| YY1 | LYPLAL1   |
| YY1 | LYRM1     |
| YY1 | LZIC      |
| YY1 | M6PR      |
| YY1 | MAD1L1    |
| YY1 | MAD2L1    |

|     |           |
|-----|-----------|
| YY1 | MAD2L1BP  |
| YY1 | MAD2L2    |
| YY1 | MAEA      |
| YY1 | MAFG      |
| YY1 | MAGED2    |
| YY1 | MAGEF1    |
| YY1 | MAGEH1    |
| YY1 | MAGOH     |
| YY1 | MALT1     |
| YY1 | MANBAL    |
| YY1 | MAP1LC3B  |
| YY1 | MAP1S     |
| YY1 | MAP2      |
| YY1 | MAP2K1    |
| YY1 | MAP2K2    |
| YY1 | MAP2K3    |
| YY1 | MAP2K5    |
| YY1 | MAP2K7    |
| YY1 | MAP3K1    |
| YY1 | MAP3K6    |
| YY1 | MAP3K7    |
| YY1 | MAP4      |
| YY1 | MAP4K4    |
| YY1 | MAP7D1    |
| YY1 | MAP9      |
| YY1 | MAPK1IP1L |
| YY1 | MAPKAP1   |
| YY1 | MAPKAPK5  |
| YY1 | MAPRE1    |
| YY1 | MARCH1    |
| YY1 | MARCH7    |
| YY1 | MARCH9    |
| YY1 | MARK3     |
| YY1 | MASTL     |
| YY1 | MAT2A     |
| YY1 | MAT2B     |
| YY1 | MAVS      |
| YY1 | MAX       |
| YY1 | MAZ       |
| YY1 | MBD2      |
| YY1 | MBD3      |
| YY1 | MBD4      |
| YY1 | MBD5      |
| YY1 | MBIP      |
| YY1 | MBNL1     |
| YY1 | MBNL3     |
| YY1 | MCAT      |
| YY1 | MCCC1     |
| YY1 | MCL1      |
| YY1 | MCM2      |



|     |           |
|-----|-----------|
| YY1 | MCM3      |
| YY1 | MCM3AP    |
| YY1 | MCM6      |
| YY1 | MCM7      |
| YY1 | MCM8      |
| YY1 | MCMBP     |
| YY1 | MCOLN2    |
| YY1 | MCRIP1    |
| YY1 | MCRS1     |
| YY1 | MCTS1     |
| YY1 | MCUR1     |
| YY1 | MDC1      |
| YY1 | MDH1      |
| YY1 | MDH2      |
| YY1 | MDM1      |
| YY1 | MDN1      |
| YY1 | MDP1      |
| YY1 | MEA1      |
| YY1 | MEAF6     |
| YY1 | MECP2     |
| YY1 | MED10     |
| YY1 | MED13     |
| YY1 | MED19     |
| YY1 | MED25     |
| YY1 | MED26     |
| YY1 | MED27     |
| YY1 | MED28     |
| YY1 | MED30     |
| YY1 | MED31     |
| YY1 | MED4      |
| YY1 | MED6      |
| YY1 | MED7      |
| YY1 | MED8      |
| YY1 | MED9      |
| YY1 | MEF2A     |
| YY1 | MELK      |
| YY1 | MEN1      |
| YY1 | MESP1     |
| YY1 | METAP1    |
| YY1 | METAP2    |
| YY1 | METTTL14  |
| YY1 | METTTL16  |
| YY1 | METTTL17  |
| YY1 | METTTL21A |
| YY1 | METTTL23  |
| YY1 | METTTL5   |
| YY1 | METTTL9   |
| YY1 | MFAP1     |
| YY1 | MFF       |
| YY1 | MFN2      |

|     |           |
|-----|-----------|
| YY1 | MFNG      |
| YY1 | MFSD14B   |
| YY1 | MFSD14C   |
| YY1 | MGAT4B    |
| YY1 | MGME1     |
| YY1 | MGMT      |
| YY1 | MIA-RAB4B |
| YY1 | MIB2      |
| YY1 | MICU1     |
| YY1 | MID1IP1   |
| YY1 | MIDN      |
| YY1 | MIEF2     |
| YY1 | MIER1     |
| YY1 | MIF       |
| YY1 | MIF4GD    |
| YY1 | MINOS1    |
| YY1 | MINPP1    |
| YY1 | MIR210HG  |
| YY1 | MIS18A    |
| YY1 | MIS18BP1  |
| YY1 | MITD1     |
| YY1 | MKL1      |
| YY1 | MKNK2     |
| YY1 | MKRN1     |
| YY1 | MKRN2     |
| YY1 | MLF2      |
| YY1 | MLLT1     |
| YY1 | MLLT10    |
| YY1 | MLYCD     |
| YY1 | MMADHC    |
| YY1 | MMD       |
| YY1 | MMGT1     |
| YY1 | MND1      |
| YY1 | MOB1A     |
| YY1 | MOB2      |
| YY1 | MOB4      |
| YY1 | MON1B     |
| YY1 | MORC2-AS1 |
| YY1 | MORF4L1   |
| YY1 | MORF4L2   |
| YY1 | MPC2      |
| YY1 | MPDU1     |
| YY1 | MPG       |
| YY1 | MPHOSPH10 |
| YY1 | MPHOSPH6  |
| YY1 | MPHOSPH8  |
| YY1 | MPLKIP    |
| YY1 | MPND      |
| YY1 | MRFAP1L1  |
| YY1 | MRGBP     |

|     |         |
|-----|---------|
| YY1 | MRM2    |
| YY1 | MRM3    |
| YY1 | MROH1   |
| YY1 | MRPL10  |
| YY1 | MRPL11  |
| YY1 | MRPL13  |
| YY1 | MRPL14  |
| YY1 | MRPL15  |
| YY1 | MRPL16  |
| YY1 | MRPL17  |
| YY1 | MRPL18  |
| YY1 | MRPL19  |
| YY1 | MRPL20  |
| YY1 | MRPL21  |
| YY1 | MRPL22  |
| YY1 | MRPL23  |
| YY1 | MRPL27  |
| YY1 | MRPL28  |
| YY1 | MRPL30  |
| YY1 | MRPL32  |
| YY1 | MRPL34  |
| YY1 | MRPL35  |
| YY1 | MRPL37  |
| YY1 | MRPL39  |
| YY1 | MRPL40  |
| YY1 | MRPL43  |
| YY1 | MRPL44  |
| YY1 | MRPL45  |
| YY1 | MRPL47  |
| YY1 | MRPL48  |
| YY1 | MRPL49  |
| YY1 | MRPL51  |
| YY1 | MRPL52  |
| YY1 | MRPL54  |
| YY1 | MRPL57  |
| YY1 | MRPS10  |
| YY1 | MRPS15  |
| YY1 | MRPS16  |
| YY1 | MRPS18A |
| YY1 | MRPS18B |
| YY1 | MRPS18C |
| YY1 | MRPS21  |
| YY1 | MRPS26  |
| YY1 | MRPS30  |
| YY1 | MRPS31  |
| YY1 | MRPS33  |
| YY1 | MRPS34  |
| YY1 | MRPS35  |
| YY1 | MRPS36  |
| YY1 | MRPS6   |

|     |         |
|-----|---------|
| YY1 | MRPS9   |
| YY1 | MRRF    |
| YY1 | MSH2    |
| YY1 | MSH3    |
| YY1 | MSH6    |
| YY1 | MSL3    |
| YY1 | MSN     |
| YY1 | MT1F    |
| YY1 | MTA2    |
| YY1 | MTA3    |
| YY1 | MTCH2   |
| YY1 | MTDH    |
| YY1 | MTERF1  |
| YY1 | MTERF4  |
| YY1 | MTF2    |
| YY1 | MTFMT   |
| YY1 | MTFR1   |
| YY1 | MTG1    |
| YY1 | MTG2    |
| YY1 | MTHFD1  |
| YY1 | MTIF2   |
| YY1 | MTIF3   |
| YY1 | MTMR14  |
| YY1 | MTMR4   |
| YY1 | MTMR6   |
| YY1 | MT01    |
| YY1 | MTPN    |
| YY1 | MTX1    |
| YY1 | MTX2    |
| YY1 | MUS81   |
| YY1 | MUTYH   |
| YY1 | MVB12A  |
| YY1 | MVD     |
| YY1 | MYBL1   |
| YY1 | MYBL2   |
| YY1 | MYCBP2  |
| YY1 | MYEF2   |
| YY1 | MYH9    |
| YY1 | MYL12A  |
| YY1 | MYL12B  |
| YY1 | MYL6B   |
| YY1 | MYLPF   |
| YY1 | MY019   |
| YY1 | MY01G   |
| YY1 | MZT1    |
| YY1 | MZT2A   |
| YY1 | N4BP2   |
| YY1 | N4BP2L1 |
| YY1 | N4BP2L2 |
| YY1 | NAA10   |

|     |           |
|-----|-----------|
| YY1 | NAA15     |
| YY1 | NAA25     |
| YY1 | NAA30     |
| YY1 | NAA35     |
| YY1 | NAA60     |
| YY1 | NAB2      |
| YY1 | NABP2     |
| YY1 | NACA      |
| YY1 | NADK      |
| YY1 | NADK2     |
| YY1 | NAE1      |
| YY1 | NAGK      |
| YY1 | NAP1L1    |
| YY1 | NAP1L4    |
| YY1 | NARFL     |
| YY1 | NASP      |
| YY1 | NAXE      |
| YY1 | NBEAL1    |
| YY1 | NCAPD3    |
| YY1 | NCAPH     |
| YY1 | NCBP2     |
| YY1 | NCBP2-AS2 |
| YY1 | NCBP3     |
| YY1 | NCF4      |
| YY1 | NCKAP1L   |
| YY1 | NCL       |
| YY1 | NCOA3     |
| YY1 | NCOA4     |
| YY1 | NCOR1     |
| YY1 | NCOR2     |
| YY1 | NDE1      |
| YY1 | NDN       |
| YY1 | NDUFA1    |
| YY1 | NDUFA10   |
| YY1 | NDUFA12   |
| YY1 | NDUFA13   |
| YY1 | NDUFA4    |
| YY1 | NDUFA4L2  |
| YY1 | NDUFA5    |
| YY1 | NDUFA6    |
| YY1 | NDUFA7    |
| YY1 | NDUFA8    |
| YY1 | NDUFAB1   |
| YY1 | NDUFAF6   |
| YY1 | NDUFB10   |
| YY1 | NDUFB2    |
| YY1 | NDUFB3    |
| YY1 | NDUFB4    |
| YY1 | NDUFB5    |
| YY1 | NDUFB6    |

|     |           |
|-----|-----------|
| YY1 | NDUFB7    |
| YY1 | NDUFB8    |
| YY1 | NDUFB9    |
| YY1 | NDUFC1    |
| YY1 | NDUFS3    |
| YY1 | NDUFS4    |
| YY1 | NDUFS5    |
| YY1 | NDUFS6    |
| YY1 | NDUFS7    |
| YY1 | NDUFS8    |
| YY1 | NDUFV1    |
| YY1 | NDUFV2    |
| YY1 | NEAT1     |
| YY1 | NEDD1     |
| YY1 | NEDD4L    |
| YY1 | NEDD8     |
| YY1 | NELFB     |
| YY1 | NELFE     |
| YY1 | NEMF      |
| YY1 | NEMP1     |
| YY1 | NEU3      |
| YY1 | NF1       |
| YY1 | NFAT5     |
| YY1 | NFATC1    |
| YY1 | NFATC2IP  |
| YY1 | NFATC3    |
| YY1 | NFE2L2    |
| YY1 | NFKBIB    |
| YY1 | NGDN      |
| YY1 | NIN       |
| YY1 | NIP7      |
| YY1 | NIPA2     |
| YY1 | NIPBL     |
| YY1 | NIPSNAP3A |
| YY1 | NKAP      |
| YY1 | NKIRAS2   |
| YY1 | NKTR      |
| YY1 | NLK       |
| YY1 | NLRP2     |
| YY1 | NME6      |
| YY1 | NMI       |
| YY1 | NMU       |
| YY1 | NOL10     |
| YY1 | NOL12     |
| YY1 | NOL7      |
| YY1 | NOL8      |
| YY1 | NOL9      |
| YY1 | NOM1      |
| YY1 | NONO      |
| YY1 | NOP10     |

|     |           |
|-----|-----------|
| YY1 | NOP14-AS1 |
| YY1 | NOP58     |
| YY1 | NOSIP     |
| YY1 | NPAT      |
| YY1 | NPEPPS    |
| YY1 | NPHP3     |
| YY1 | NPIP15    |
| YY1 | NPL0C4    |
| YY1 | NPM1      |
| YY1 | NPM3      |
| YY1 | NPRL2     |
| YY1 | NR1H2     |
| YY1 | NR2C1     |
| YY1 | NR2C2AP   |
| YY1 | NR3C1     |
| YY1 | NRAS      |
| YY1 | NRAV      |
| YY1 | NRBF2     |
| YY1 | NRBP1     |
| YY1 | NRDC      |
| YY1 | NRDE2     |
| YY1 | NSA2      |
| YY1 | NSD1      |
| YY1 | NSDHL     |
| YY1 | NSMCE3    |
| YY1 | NSMCE4A   |
| YY1 | NT5C      |
| YY1 | NTAN1     |
| YY1 | NTPCR     |
| YY1 | NUBP2     |
| YY1 | NUBPL     |
| YY1 | NUCB1     |
| YY1 | NUCKS1    |
| YY1 | NUDC      |
| YY1 | NUDCD2    |
| YY1 | NUDCD3    |
| YY1 | NUDT1     |
| YY1 | NUDT16L1  |
| YY1 | NUDT21    |
| YY1 | NUDT5     |
| YY1 | NUDT8     |
| YY1 | NUFIP2    |
| YY1 | NUP107    |
| YY1 | NUP133    |
| YY1 | NUP153    |
| YY1 | NUP160    |
| YY1 | NUP210    |
| YY1 | NUP214    |
| YY1 | NUP37     |
| YY1 | NUP50     |

|     |            |
|-----|------------|
| YY1 | NUP58      |
| YY1 | NUP93      |
| YY1 | NUSAP1     |
| YY1 | NUTF2      |
| YY1 | NUTM2B-AS1 |
| YY1 | NXF1       |
| YY1 | NXT1       |
| YY1 | NXT2       |
| YY1 | OARD1      |
| YY1 | OAZ1       |
| YY1 | OCIAD1     |
| YY1 | OCIAD2     |
| YY1 | ODF2       |
| YY1 | OGG1       |
| YY1 | OGT        |
| YY1 | OLA1       |
| YY1 | OPA1       |
| YY1 | ORAI2      |
| YY1 | ORC5       |
| YY1 | ORC6       |
| YY1 | ORMDL1     |
| YY1 | ORMDL2     |
| YY1 | OSBPL11    |
| YY1 | OSBPL8     |
| YY1 | OSBPL9     |
| YY1 | OST4       |
| YY1 | OSTC       |
| YY1 | OTUB1      |
| YY1 | OTUD1      |
| YY1 | OTUD3      |
| YY1 | OTUD4      |
| YY1 | OTUD6B     |
| YY1 | OTULIN     |
| YY1 | OXA1L      |
| YY1 | OXCT1      |
| YY1 | OXNAD1     |
| YY1 | P4HB       |
| YY1 | PA2G4      |
| YY1 | PABPC1     |
| YY1 | PABPC4     |
| YY1 | PABPN1     |
| YY1 | PACS1      |
| YY1 | PACSIN2    |
| YY1 | PADI4      |
| YY1 | PAFAH1B3   |
| YY1 | PAIP1      |
| YY1 | PAIP2      |
| YY1 | PAK1       |
| YY1 | PAK2       |
| YY1 | PAK4       |



|     |         |
|-----|---------|
| YY1 | PALLD   |
| YY1 | PANK2   |
| YY1 | PANK3   |
| YY1 | PAPOLA  |
| YY1 | PAPSS1  |
| YY1 | PARG    |
| YY1 | PARK7   |
| YY1 | PARL    |
| YY1 | PAXBP1  |
| YY1 | PAXIP1  |
| YY1 | PBK     |
| YY1 | PBRM1   |
| YY1 | PCBD2   |
| YY1 | PCBP1   |
| YY1 | PCBP2   |
| YY1 | PCF11   |
| YY1 | PCGF1   |
| YY1 | PCGF3   |
| YY1 | PCGF6   |
| YY1 | PCIF1   |
| YY1 | PCM1    |
| YY1 | PCMT1   |
| YY1 | PCNA    |
| YY1 | PCNP    |
| YY1 | PCNT    |
| YY1 | PCNX1   |
| YY1 | PCNX4   |
| YY1 | PCSK7   |
| YY1 | PDAP1   |
| YY1 | PDCD10  |
| YY1 | PDCD2   |
| YY1 | PDCD6   |
| YY1 | PDCD7   |
| YY1 | PDE4D   |
| YY1 | PDE4DIP |
| YY1 | PDE6D   |
| YY1 | PDHB    |
| YY1 | PDK2    |
| YY1 | PDLIM1  |
| YY1 | PDRG1   |
| YY1 | PDS5A   |
| YY1 | PDS5B   |
| YY1 | PDSS2   |
| YY1 | PDXDC1  |
| YY1 | PDZD11  |
| YY1 | PEF1    |
| YY1 | PET100  |
| YY1 | PEX1    |
| YY1 | PEX10   |
| YY1 | PEX11B  |

|     |         |
|-----|---------|
| YY1 | PEX16   |
| YY1 | PEX19   |
| YY1 | PEX3    |
| YY1 | PFDN1   |
| YY1 | PFDN5   |
| YY1 | PFDN6   |
| YY1 | PFN1    |
| YY1 | PGAM1   |
| YY1 | PGAM5   |
| YY1 | PGK1    |
| YY1 | PGLS    |
| YY1 | PGM1    |
| YY1 | PGM2    |
| YY1 | PGP     |
| YY1 | PGRMC1  |
| YY1 | PGS1    |
| YY1 | PHACTR4 |
| YY1 | PHB     |
| YY1 | PHB2    |
| YY1 | PHF10   |
| YY1 | PHF12   |
| YY1 | PHF13   |
| YY1 | PHF14   |
| YY1 | PHF20   |
| YY1 | PHF20L1 |
| YY1 | PHF21A  |
| YY1 | PHF23   |
| YY1 | PHF5A   |
| YY1 | PHF7    |
| YY1 | PHIP    |
| YY1 | PHLPP1  |
| YY1 | PHRF1   |
| YY1 | PHTF2   |
| YY1 | PI4K2A  |
| YY1 | PIAS2   |
| YY1 | PIGA    |
| YY1 | PIGB0S1 |
| YY1 | PIGC    |
| YY1 | PIGF    |
| YY1 | PIGG    |
| YY1 | PIGP    |
| YY1 | PIGV    |
| YY1 | PIH1D1  |
| YY1 | PIK3CD  |
| YY1 | PILRB   |
| YY1 | PIM1    |
| YY1 | PIN1    |
| YY1 | PIN4    |
| YY1 | PIP4K2A |
| YY1 | PISD    |

|     |         |
|-----|---------|
| YY1 | PITHD1  |
| YY1 | PITPNA  |
| YY1 | PITPNM1 |
| YY1 | PJA2    |
| YY1 | PKIG    |
| YY1 | PKM     |
| YY1 | PKN1    |
| YY1 | PKN2    |
| YY1 | PLAA    |
| YY1 | PLAGL2  |
| YY1 | PLCD1   |
| YY1 | PLCL2   |
| YY1 | PLEKHA3 |
| YY1 | PLEKHB1 |
| YY1 | PLEKHG2 |
| YY1 | PLEKHJ1 |
| YY1 | PLK4    |
| YY1 | PLPP1   |
| YY1 | PMAIP1  |
| YY1 | PMF1    |
| YY1 | PMM1    |
| YY1 | PMPCB   |
| YY1 | PMS1    |
| YY1 | PMVK    |
| YY1 | PNISR   |
| YY1 | PNKD    |
| YY1 | PNKP    |
| YY1 | PNMA1   |
| YY1 | PNN     |
| YY1 | PNP     |
| YY1 | PNPLA4  |
| YY1 | PNPLA6  |
| YY1 | PNPLA8  |
| YY1 | PNRC1   |
| YY1 | PNRC2   |
| YY1 | POC1A   |
| YY1 | POC1B   |
| YY1 | POLA2   |
| YY1 | POLD3   |
| YY1 | POLD4   |
| YY1 | POLDIP2 |
| YY1 | POLDIP3 |
| YY1 | POLE3   |
| YY1 | POLG    |
| YY1 | POLR1D  |
| YY1 | POLR1E  |
| YY1 | POLR2B  |
| YY1 | POLR2C  |
| YY1 | POLR2D  |
| YY1 | POLR2E  |

|     |          |
|-----|----------|
| YY1 | P0LR2F   |
| YY1 | P0LR2G   |
| YY1 | P0LR2H   |
| YY1 | P0LR2I   |
| YY1 | P0LR2J   |
| YY1 | P0LR2K   |
| YY1 | P0LR2L   |
| YY1 | P0LR2M   |
| YY1 | P0LR3E   |
| YY1 | P0LR3GL  |
| YY1 | P0MP     |
| YY1 | P0P4     |
| YY1 | P0P5     |
| YY1 | P0P7     |
| YY1 | P0U2F2   |
| YY1 | PPA1     |
| YY1 | PPA2     |
| YY1 | PPCS     |
| YY1 | PPHLN1   |
| YY1 | PPIA     |
| YY1 | PPID     |
| YY1 | PPIE     |
| YY1 | PPIG     |
| YY1 | PPIH     |
| YY1 | PPIL2    |
| YY1 | PPIL4    |
| YY1 | PPIP5K2  |
| YY1 | PPM1A    |
| YY1 | PPM1D    |
| YY1 | PPM1G    |
| YY1 | PPME1    |
| YY1 | PPP1CA   |
| YY1 | PPP1CB   |
| YY1 | PPP1CC   |
| YY1 | PPP1R10  |
| YY1 | PPP1R11  |
| YY1 | PPP1R12A |
| YY1 | PPP1R12C |
| YY1 | PPP1R14B |
| YY1 | PPP1R15A |
| YY1 | PPP1R2   |
| YY1 | PPP1R21  |
| YY1 | PPP1R35  |
| YY1 | PPP2CA   |
| YY1 | PPP2R1A  |
| YY1 | PPP2R1B  |
| YY1 | PPP2R2A  |
| YY1 | PPP2R5A  |
| YY1 | PPP2R5B  |
| YY1 | PPP2R5C  |

|     |          |
|-----|----------|
| YY1 | PPP2R5E  |
| YY1 | PPP3CB   |
| YY1 | PPP3R1   |
| YY1 | PPP4C    |
| YY1 | PPP4R2   |
| YY1 | PPP4R3A  |
| YY1 | PPP4R3B  |
| YY1 | PPP5C    |
| YY1 | PPP6C    |
| YY1 | PPP6R1   |
| YY1 | PPP6R2   |
| YY1 | PPP6R3   |
| YY1 | PQLC1    |
| YY1 | PRCC     |
| YY1 | PRDM2    |
| YY1 | PRDX6    |
| YY1 | PRELID1  |
| YY1 | PRELID3B |
| YY1 | PRH1     |
| YY1 | PRIM1    |
| YY1 | PRKACA   |
| YY1 | PRKACB   |
| YY1 | PRKAG1   |
| YY1 | PRKAR1A  |
| YY1 | PRKAR2A  |
| YY1 | PRKCD    |
| YY1 | PRKCE    |
| YY1 | PRKCZ    |
| YY1 | PRKD2    |
| YY1 | PRKD3    |
| YY1 | PRKDC    |
| YY1 | PRKRA    |
| YY1 | PRKRIP1  |
| YY1 | PRMT2    |
| YY1 | PRPF19   |
| YY1 | PRPF3    |
| YY1 | PRPF31   |
| YY1 | PRPF38A  |
| YY1 | PRPF38B  |
| YY1 | PRPF39   |
| YY1 | PRPF4    |
| YY1 | PRPF40A  |
| YY1 | PRPF4B   |
| YY1 | PRPF8    |
| YY1 | PRPS1    |
| YY1 | PRPS2    |
| YY1 | PRPSAP1  |
| YY1 | PRR13    |
| YY1 | PRR7-AS1 |
| YY1 | PRRC2A   |

|     |           |
|-----|-----------|
| YY1 | PRRC2B    |
| YY1 | PRRC2C    |
| YY1 | PSD4      |
| YY1 | PSEN1     |
| YY1 | PSIP1     |
| YY1 | PSKH1     |
| YY1 | PSMA1     |
| YY1 | PSMA2     |
| YY1 | PSMA3     |
| YY1 | PSMA3-AS1 |
| YY1 | PSMA4     |
| YY1 | PSMA5     |
| YY1 | PSMA7     |
| YY1 | PSMB1     |
| YY1 | PSMB2     |
| YY1 | PSMB3     |
| YY1 | PSMB4     |
| YY1 | PSMB5     |
| YY1 | PSMB7     |
| YY1 | PSMB8     |
| YY1 | PSMB9     |
| YY1 | PSMC1     |
| YY1 | PSMC2     |
| YY1 | PSMC3     |
| YY1 | PSMC4     |
| YY1 | PSMC5     |
| YY1 | PSMC6     |
| YY1 | PSMD1     |
| YY1 | PSMD11    |
| YY1 | PSMD12    |
| YY1 | PSMD13    |
| YY1 | PSMD14    |
| YY1 | PSMD2     |
| YY1 | PSMD3     |
| YY1 | PSMD4     |
| YY1 | PSMD6     |
| YY1 | PSMD7     |
| YY1 | PSMD8     |
| YY1 | PSMD9     |
| YY1 | PSME1     |
| YY1 | PSME3     |
| YY1 | PSME4     |
| YY1 | PSMF1     |
| YY1 | PSMG2     |
| YY1 | PSPC1     |
| YY1 | PSRC1     |
| YY1 | PSTK      |
| YY1 | PTBP1     |
| YY1 | PTBP3     |
| YY1 | PTDSS1    |

|     |           |
|-----|-----------|
| YY1 | PTEN      |
| YY1 | PTGES3    |
| YY1 | PTMA      |
| YY1 | PTOV1     |
| YY1 | PTP4A1    |
| YY1 | PTP4A2    |
| YY1 | PTPN12    |
| YY1 | PTPN2     |
| YY1 | PTPRA     |
| YY1 | PTRH2     |
| YY1 | PTRHD1    |
| YY1 | PTTG1     |
| YY1 | PTTG1IP   |
| YY1 | PUDP      |
| YY1 | PUF60     |
| YY1 | PUM1      |
| YY1 | PUM2      |
| YY1 | PURA      |
| YY1 | PUS10     |
| YY1 | PWP1      |
| YY1 | PXK       |
| YY1 | PYGB      |
| YY1 | PYURF     |
| YY1 | QARS      |
| YY1 | QKI       |
| YY1 | QSER1     |
| YY1 | QS0X2     |
| YY1 | R3HDM4    |
| YY1 | RAB10     |
| YY1 | RAB11B    |
| YY1 | RAB11FIP1 |
| YY1 | RAB14     |
| YY1 | RAB1A     |
| YY1 | RAB21     |
| YY1 | RAB22A    |
| YY1 | RAB2A     |
| YY1 | RAB30     |
| YY1 | RAB35     |
| YY1 | RAB37     |
| YY1 | RAB3GAP1  |
| YY1 | RAB5A     |
| YY1 | RAB5C     |
| YY1 | RAB6A     |
| YY1 | RAB7A     |
| YY1 | RAB8A     |
| YY1 | RAB8B     |
| YY1 | RAB9A     |
| YY1 | RABEP1    |
| YY1 | RABIF     |
| YY1 | RABL2B    |

|     |         |
|-----|---------|
| YY1 | RABL6   |
| YY1 | RAC1    |
| YY1 | RACGAP1 |
| YY1 | RACK1   |
| YY1 | RAD17   |
| YY1 | RAD18   |
| YY1 | RAD21   |
| YY1 | RAD23A  |
| YY1 | RAD23B  |
| YY1 | RAD51D  |
| YY1 | RAD54B  |
| YY1 | RAD9A   |
| YY1 | RAE1    |
| YY1 | RAF1    |
| YY1 | RALA    |
| YY1 | RALB    |
| YY1 | RALBP1  |
| YY1 | RALGAPB |
| YY1 | RALGPS2 |
| YY1 | RALY    |
| YY1 | RAN     |
| YY1 | RANBP1  |
| YY1 | RANBP3  |
| YY1 | RANGRF  |
| YY1 | RAP1A   |
| YY1 | RAP1B   |
| YY1 | RAPGEF1 |
| YY1 | RAPGEF5 |
| YY1 | RAPGEF6 |
| YY1 | RARS    |
| YY1 | RARS2   |
| YY1 | RASAL3  |
| YY1 | RASGRF1 |
| YY1 | RASSF1  |
| YY1 | RASSF5  |
| YY1 | RB1     |
| YY1 | RB1CC1  |
| YY1 | RBBP6   |
| YY1 | RBBP7   |
| YY1 | RBBP8   |
| YY1 | RBCK1   |
| YY1 | RBM10   |
| YY1 | RBM12   |
| YY1 | RBM12B  |
| YY1 | RBM14   |
| YY1 | RBM15   |
| YY1 | RBM15B  |
| YY1 | RBM17   |
| YY1 | RBM18   |
| YY1 | RBM22   |



|     |           |
|-----|-----------|
| YY1 | RBM23     |
| YY1 | RBM25     |
| YY1 | RBM26     |
| YY1 | RBM26-AS1 |
| YY1 | RBM27     |
| YY1 | RBM28     |
| YY1 | RBM3      |
| YY1 | RBM39     |
| YY1 | RBM4      |
| YY1 | RBM41     |
| YY1 | RBM42     |
| YY1 | RBM45     |
| YY1 | RBM7      |
| YY1 | RBM8A     |
| YY1 | RBMX      |
| YY1 | RBMX2     |
| YY1 | RBMXL1    |
| YY1 | RBPJ      |
| YY1 | RBX1      |
| YY1 | RCC1      |
| YY1 | RCC1L     |
| YY1 | RCC2      |
| YY1 | RCHY1     |
| YY1 | RCSD1     |
| YY1 | RDH14     |
| YY1 | RECQL     |
| YY1 | RELA      |
| YY1 | RELB      |
| YY1 | RELL2     |
| YY1 | REPS1     |
| YY1 | RER1      |
| YY1 | RERE      |
| YY1 | REST      |
| YY1 | REV1      |
| YY1 | REX02     |
| YY1 | REX04     |
| YY1 | RFC1      |
| YY1 | RFC2      |
| YY1 | RFC3      |
| YY1 | RFC4      |
| YY1 | RFC5      |
| YY1 | RFK       |
| YY1 | RFT1      |
| YY1 | RFTN1     |
| YY1 | RFX5      |
| YY1 | RFX7      |
| YY1 | RFXANK    |
| YY1 | RGS10     |
| YY1 | RGS14     |
| YY1 | RGS3      |

|     |          |
|-----|----------|
| YY1 | RHBDD2   |
| YY1 | RHEB     |
| YY1 | RHN01    |
| YY1 | RHOBTB2  |
| YY1 | RHOG     |
| YY1 | RHOH     |
| YY1 | RHOT2    |
| YY1 | RIC8A    |
| YY1 | RICTOR   |
| YY1 | RIF1     |
| YY1 | RING1    |
| YY1 | RIOK3    |
| YY1 | RIPK2    |
| YY1 | RMI1     |
| YY1 | RMI2     |
| YY1 | RMND1    |
| YY1 | RMND5B   |
| YY1 | RNASEH1  |
| YY1 | RNASEH2B |
| YY1 | RNASEH2C |
| YY1 | RNASEL   |
| YY1 | RNF10    |
| YY1 | RNF114   |
| YY1 | RNF115   |
| YY1 | RNF126   |
| YY1 | RNF138   |
| YY1 | RNF139   |
| YY1 | RNF14    |
| YY1 | RNF146   |
| YY1 | RNF166   |
| YY1 | RNF167   |
| YY1 | RNF168   |
| YY1 | RNF181   |
| YY1 | RNF187   |
| YY1 | RNF2     |
| YY1 | RNF20    |
| YY1 | RNF216   |
| YY1 | RNF219   |
| YY1 | RNF25    |
| YY1 | RNF26    |
| YY1 | RNF4     |
| YY1 | RNF41    |
| YY1 | RNF6     |
| YY1 | RNF7     |
| YY1 | RNF8     |
| YY1 | RNMT     |
| YY1 | RNPEPL1  |
| YY1 | RNPS1    |
| YY1 | ROCK1    |
| YY1 | ROCK2    |

|     |         |
|-----|---------|
| YY1 | RPA2    |
| YY1 | RPE     |
| YY1 | RPIA    |
| YY1 | RPL10   |
| YY1 | RPL10A  |
| YY1 | RPL11   |
| YY1 | RPL12   |
| YY1 | RPL13   |
| YY1 | RPL13A  |
| YY1 | RPL14   |
| YY1 | RPL15   |
| YY1 | RPL17   |
| YY1 | RPL18A  |
| YY1 | RPL19   |
| YY1 | RPL21   |
| YY1 | RPL22   |
| YY1 | RPL22L1 |
| YY1 | RPL23   |
| YY1 | RPL23A  |
| YY1 | RPL24   |
| YY1 | RPL26   |
| YY1 | RPL26L1 |
| YY1 | RPL27   |
| YY1 | RPL27A  |
| YY1 | RPL28   |
| YY1 | RPL29   |
| YY1 | RPL3    |
| YY1 | RPL30   |
| YY1 | RPL31   |
| YY1 | RPL32   |
| YY1 | RPL34   |
| YY1 | RPL35   |
| YY1 | RPL35A  |
| YY1 | RPL36   |
| YY1 | RPL36AL |
| YY1 | RPL37   |
| YY1 | RPL37A  |
| YY1 | RPL38   |
| YY1 | RPL39   |
| YY1 | RPL4    |
| YY1 | RPL41   |
| YY1 | RPL5    |
| YY1 | RPL6    |
| YY1 | RPL7    |
| YY1 | RPL7L1  |
| YY1 | RPL8    |
| YY1 | RPL9    |
| YY1 | RPLP0   |
| YY1 | RPLP1   |
| YY1 | RPLP2   |

|     |          |
|-----|----------|
| YY1 | RPP25L   |
| YY1 | RPP30    |
| YY1 | RPP38    |
| YY1 | RPRD2    |
| YY1 | RPS10    |
| YY1 | RPS11    |
| YY1 | RPS12    |
| YY1 | RPS13    |
| YY1 | RPS14    |
| YY1 | RPS15    |
| YY1 | RPS15A   |
| YY1 | RPS16    |
| YY1 | RPS17    |
| YY1 | RPS18    |
| YY1 | RPS19    |
| YY1 | RPS19BP1 |
| YY1 | RPS2     |
| YY1 | RPS20    |
| YY1 | RPS21    |
| YY1 | RPS23    |
| YY1 | RPS24    |
| YY1 | RPS25    |
| YY1 | RPS26    |
| YY1 | RPS27    |
| YY1 | RPS27A   |
| YY1 | RPS27L   |
| YY1 | RPS28    |
| YY1 | RPS29    |
| YY1 | RPS3     |
| YY1 | RPS3A    |
| YY1 | RPS4X    |
| YY1 | RPS5     |
| YY1 | RPS6     |
| YY1 | RPS6KA3  |
| YY1 | RPS6KB2  |
| YY1 | RPS7     |
| YY1 | RPS8     |
| YY1 | RPS9     |
| YY1 | RPSA     |
| YY1 | RPUSD1   |
| YY1 | RPUSD2   |
| YY1 | RRAGC    |
| YY1 | RRM1     |
| YY1 | RRM2B    |
| YY1 | RRP36    |
| YY1 | RSBN1    |
| YY1 | RSBN1L   |
| YY1 | RSF1     |
| YY1 | RSL1D1   |
| YY1 | RSL24D1  |

|     |         |
|-----|---------|
| YY1 | RSRC1   |
| YY1 | RSRC2   |
| YY1 | RSRP1   |
| YY1 | RSU1    |
| YY1 | RTCA    |
| YY1 | RTCB    |
| YY1 | RTF1    |
| YY1 | RTN3    |
| YY1 | RTN4    |
| YY1 | RUFY1   |
| YY1 | RUFY3   |
| YY1 | RUNX3   |
| YY1 | RUVBL1  |
| YY1 | RXRB    |
| YY1 | RYBP    |
| YY1 | S100PBP |
| YY1 | SAAL1   |
| YY1 | SACM1L  |
| YY1 | SAE1    |
| YY1 | SAFB    |
| YY1 | SAFB2   |
| YY1 | SAMD4A  |
| YY1 | SAMD4B  |
| YY1 | SAMM50  |
| YY1 | SAP18   |
| YY1 | SAP30BP |
| YY1 | SAP30L  |
| YY1 | SARNP   |
| YY1 | SART1   |
| YY1 | SART3   |
| YY1 | SASH3   |
| YY1 | SAT1    |
| YY1 | SC5D    |
| YY1 | SCAF1   |
| YY1 | SCAF11  |
| YY1 | SCAF4   |
| YY1 | SCAND1  |
| YY1 | SCCPDH  |
| YY1 | SCD     |
| YY1 | SCFD1   |
| YY1 | SCLT1   |
| YY1 | SCML4   |
| YY1 | SCNM1   |
| YY1 | SC01    |
| YY1 | SC0C    |
| YY1 | SCRN2   |
| YY1 | SDAD1   |
| YY1 | SDCBP   |
| YY1 | SDCCAG8 |
| YY1 | SDF2    |

|     |           |
|-----|-----------|
| YY1 | SDHA      |
| YY1 | SDHB      |
| YY1 | SDHC      |
| YY1 | SDHD      |
| YY1 | SEC11A    |
| YY1 | SEC16A    |
| YY1 | SEC22C    |
| YY1 | SEC23A    |
| YY1 | SEC61A2   |
| YY1 | SEC62     |
| YY1 | SECISBP2L |
| YY1 | SEMA4A    |
| YY1 | SENP2     |
| YY1 | SENP5     |
| YY1 | SENP6     |
| YY1 | SEPHS2    |
| YY1 | SEPT11    |
| YY1 | SEPT2     |
| YY1 | SEPT6     |
| YY1 | SEPT7     |
| YY1 | SEPT9     |
| YY1 | SERBP1    |
| YY1 | SERF2     |
| YY1 | SERPINB8  |
| YY1 | SET       |
| YY1 | SETD2     |
| YY1 | SETD5     |
| YY1 | SETD9     |
| YY1 | SF1       |
| YY1 | SF3A1     |
| YY1 | SF3A2     |
| YY1 | SF3A3     |
| YY1 | SF3B1     |
| YY1 | SF3B2     |
| YY1 | SF3B4     |
| YY1 | SF3B5     |
| YY1 | SF3B6     |
| YY1 | SFPQ      |
| YY1 | SFR1      |
| YY1 | SFSWAP    |
| YY1 | SFT2D1    |
| YY1 | SFT2D2    |
| YY1 | SFXN1     |
| YY1 | SFXN2     |
| YY1 | SGCB      |
| YY1 | SG01      |
| YY1 | SG02      |
| YY1 | SGPL1     |
| YY1 | SGTA      |
| YY1 | SH2B3     |

|     |          |
|-----|----------|
| YY1 | SH2D3C   |
| YY1 | SH3BGRL  |
| YY1 | SH3BP1   |
| YY1 | SH3BP5   |
| YY1 | SH3GL1   |
| YY1 | SH3GLB1  |
| YY1 | SH3KBP1  |
| YY1 | SHANK2   |
| YY1 | SHARPIN  |
| YY1 | SHISA5   |
| YY1 | SHISA8   |
| YY1 | SHKBP1   |
| YY1 | SHMT2    |
| YY1 | SHOC2    |
| YY1 | SHPRH    |
| YY1 | SHR00M1  |
| YY1 | SIKE1    |
| YY1 | SIMC1    |
| YY1 | SIN3A    |
| YY1 | SIRT6    |
| YY1 | SIRT7    |
| YY1 | SIT1     |
| YY1 | SIVA1    |
| YY1 | SKA1     |
| YY1 | SKA3     |
| YY1 | SKAP2    |
| YY1 | SKP1     |
| YY1 | SKP2     |
| YY1 | SLC15A4  |
| YY1 | SLC1A1   |
| YY1 | SLC25A1  |
| YY1 | SLC25A11 |
| YY1 | SLC25A16 |
| YY1 | SLC25A17 |
| YY1 | SLC25A19 |
| YY1 | SLC25A20 |
| YY1 | SLC25A24 |
| YY1 | SLC25A3  |
| YY1 | SLC25A33 |
| YY1 | SLC25A36 |
| YY1 | SLC25A37 |
| YY1 | SLC25A39 |
| YY1 | SLC25A46 |
| YY1 | SLC25A5  |
| YY1 | SLC29A1  |
| YY1 | SLC35A4  |
| YY1 | SLC35A5  |
| YY1 | SLC35E3  |
| YY1 | SLC35F5  |
| YY1 | SLC36A4  |

|     |          |
|-----|----------|
| YY1 | SLC38A1  |
| YY1 | SLC39A3  |
| YY1 | SLC39A6  |
| YY1 | SLC41A1  |
| YY1 | SLC44A2  |
| YY1 | SLC4A2   |
| YY1 | SLC4A7   |
| YY1 | SLC50A1  |
| YY1 | SLC6A6   |
| YY1 | SLC7A7   |
| YY1 | SLC9A3R1 |
| YY1 | SLC9A7   |
| YY1 | SLIRP    |
| YY1 | SLK      |
| YY1 | SLTM     |
| YY1 | SLU7     |
| YY1 | SMAD4    |
| YY1 | SMAP2    |
| YY1 | SMARCA2  |
| YY1 | SMARCA4  |
| YY1 | SMARCA5  |
| YY1 | SMARCAL1 |
| YY1 | SMARCB1  |
| YY1 | SMARCC1  |
| YY1 | SMARCC2  |
| YY1 | SMARCD1  |
| YY1 | SMARCD2  |
| YY1 | SMC1A    |
| YY1 | SMC2     |
| YY1 | SMC3     |
| YY1 | SMC4     |
| YY1 | SMC5     |
| YY1 | SMCHD1   |
| YY1 | SMC04    |
| YY1 | SMDT1    |
| YY1 | SMG1     |
| YY1 | SMG7     |
| YY1 | SMIM10L1 |
| YY1 | SMIM12   |
| YY1 | SMIM15   |
| YY1 | SMIM20   |
| YY1 | SMIM4    |
| YY1 | SMIM7    |
| YY1 | SMIM8    |
| YY1 | SMNDC1   |
| YY1 | SMPD2    |
| YY1 | SMPD4    |
| YY1 | SMU1     |
| YY1 | SMYD4    |
| YY1 | SNAP23   |



|     |          |
|-----|----------|
| YY1 | SNAPC1   |
| YY1 | SNAPC2   |
| YY1 | SNAPC3   |
| YY1 | SNAPC5   |
| YY1 | SNAPIN   |
| YY1 | SND1     |
| YY1 | SNF8     |
| YY1 | SNHG7    |
| YY1 | SNHG9    |
| YY1 | SNIP1    |
| YY1 | SNRNP200 |
| YY1 | SNRNP27  |
| YY1 | SNRNP35  |
| YY1 | SNRNP40  |
| YY1 | SNRNP70  |
| YY1 | SNRPA    |
| YY1 | SNRPA1   |
| YY1 | SNRPB    |
| YY1 | SNRPB2   |
| YY1 | SNRPD1   |
| YY1 | SNRPD2   |
| YY1 | SNRPE    |
| YY1 | SNRPF    |
| YY1 | SNRPG    |
| YY1 | SNU13    |
| YY1 | SNW1     |
| YY1 | SNX1     |
| YY1 | SNX10    |
| YY1 | SNX14    |
| YY1 | SNX15    |
| YY1 | SNX17    |
| YY1 | SNX2     |
| YY1 | SNX5     |
| YY1 | SOD1     |
| YY1 | SOGA1    |
| YY1 | SON      |
| YY1 | SP100    |
| YY1 | SP3      |
| YY1 | SPA17    |
| YY1 | SPAG7    |
| YY1 | SPAG9    |
| YY1 | SPATA24  |
| YY1 | SPATA33  |
| YY1 | SPATA5L1 |
| YY1 | SPECC1L  |
| YY1 | SPEN     |
| YY1 | SPG21    |
| YY1 | SPG7     |
| YY1 | SPI1     |
| YY1 | SPIN2B   |

|     |           |
|-----|-----------|
| YY1 | SPINT1    |
| YY1 | SPINT2    |
| YY1 | SPOP      |
| YY1 | SPOPL     |
| YY1 | SPPL2A    |
| YY1 | SPSB2     |
| YY1 | SPSB3     |
| YY1 | SPTAN1    |
| YY1 | SPTBN1    |
| YY1 | SPTLC1    |
| YY1 | SPTLC2    |
| YY1 | SPTSSA    |
| YY1 | SQLE      |
| YY1 | SREBF2    |
| YY1 | SREK1     |
| YY1 | SREK1IP1  |
| YY1 | SRFBP1    |
| YY1 | SRGAP2C   |
| YY1 | SRP14     |
| YY1 | SRP19     |
| YY1 | SRP9      |
| YY1 | SRPK1     |
| YY1 | SRPK2     |
| YY1 | SRRM1     |
| YY1 | SRRM2     |
| YY1 | SRRM2-AS1 |
| YY1 | SRRT      |
| YY1 | SRSF1     |
| YY1 | SRSF10    |
| YY1 | SRSF11    |
| YY1 | SRSF2     |
| YY1 | SRSF3     |
| YY1 | SRSF4     |
| YY1 | SRSF5     |
| YY1 | SRSF6     |
| YY1 | SRSF9     |
| YY1 | SS18L2    |
| YY1 | SSB       |
| YY1 | SSBP1     |
| YY1 | SSBP4     |
| YY1 | SSH2      |
| YY1 | SSNA1     |
| YY1 | SSRP1     |
| YY1 | SSU72     |
| YY1 | ST13      |
| YY1 | ST14      |
| YY1 | ST20-AS1  |
| YY1 | ST3GAL3   |
| YY1 | ST3GAL4   |
| YY1 | STAG1     |

|     |          |
|-----|----------|
| YY1 | STAG2    |
| YY1 | STAMBPL1 |
| YY1 | STARD7   |
| YY1 | STAT2    |
| YY1 | STAT3    |
| YY1 | STAT6    |
| YY1 | STAU1    |
| YY1 | STAU2    |
| YY1 | STIM1    |
| YY1 | STIP1    |
| YY1 | STK11    |
| YY1 | STK11IP  |
| YY1 | STK16    |
| YY1 | STK24    |
| YY1 | STK25    |
| YY1 | STK3     |
| YY1 | STK38L   |
| YY1 | STK4     |
| YY1 | STMN1    |
| YY1 | STOML1   |
| YY1 | STOML2   |
| YY1 | STRADA   |
| YY1 | STRAP    |
| YY1 | STRBP    |
| YY1 | STUB1    |
| YY1 | STX10    |
| YY1 | STX11    |
| YY1 | STX18    |
| YY1 | STX5     |
| YY1 | STX6     |
| YY1 | STX8     |
| YY1 | STXBP2   |
| YY1 | STXBP3   |
| YY1 | SUCLA2   |
| YY1 | SUCLG1   |
| YY1 | SUCLG2   |
| YY1 | SUC0     |
| YY1 | SUDS3    |
| YY1 | SUGP1    |
| YY1 | SUGP2    |
| YY1 | SUGT1    |
| YY1 | SULF2    |
| YY1 | SUM01    |
| YY1 | SUM02    |
| YY1 | SUM03    |
| YY1 | SUM04    |
| YY1 | SUPT16H  |
| YY1 | SUPT4H1  |
| YY1 | SUPT5H   |
| YY1 | SUPT6H   |

|     |         |
|-----|---------|
| YY1 | SURF1   |
| YY1 | SUSD1   |
| YY1 | SUV39H1 |
| YY1 | SUZ12   |
| YY1 | SVBP    |
| YY1 | SWAP70  |
| YY1 | SYCE1L  |
| YY1 | SYCE2   |
| YY1 | SYCP2   |
| YY1 | SYF2    |
| YY1 | SYMPK   |
| YY1 | SYNC    |
| YY1 | SYNCRIP |
| YY1 | SYNE3   |
| YY1 | SYNJ2BP |
| YY1 | SYPL1   |
| YY1 | SYS1    |
| YY1 | SZRD1   |
| YY1 | TAB2    |
| YY1 | TACC1   |
| YY1 | TACC3   |
| YY1 | TADA1   |
| YY1 | TADA2A  |
| YY1 | TAF10   |
| YY1 | TAF11   |
| YY1 | TAF12   |
| YY1 | TAF15   |
| YY1 | TAF1A   |
| YY1 | TAF1C   |
| YY1 | TAF2    |
| YY1 | TAF3    |
| YY1 | TAF4    |
| YY1 | TAF7    |
| YY1 | TAF9    |
| YY1 | TAF9B   |
| YY1 | TAGLN2  |
| YY1 | TANG02  |
| YY1 | TAOK2   |
| YY1 | TAOK3   |
| YY1 | TAPBP   |
| YY1 | TARBP2  |
| YY1 | TARDBP  |
| YY1 | TAX1BP1 |
| YY1 | TBC1D1  |
| YY1 | TBC1D15 |
| YY1 | TBC1D2  |
| YY1 | TBC1D23 |
| YY1 | TBC1D25 |
| YY1 | TBC1D4  |
| YY1 | TBC1D5  |

|     |             |
|-----|-------------|
| YY1 | TBCA        |
| YY1 | TBCB        |
| YY1 | TBCC        |
| YY1 | TBL1X       |
| YY1 | TBL1XR1     |
| YY1 | TBPL1       |
| YY1 | TBRG1       |
| YY1 | TBRG4       |
| YY1 | TCAIM       |
| YY1 | TCEA2       |
| YY1 | TCERG1      |
| YY1 | TCF12       |
| YY1 | TCF25       |
| YY1 | TCF3        |
| YY1 | TCF4        |
| YY1 | TCOF1       |
| YY1 | TCP1        |
| YY1 | TCTA        |
| YY1 | TCTN3       |
| YY1 | TDG         |
| YY1 | TDP2        |
| YY1 | TDRKH       |
| YY1 | TEL02       |
| YY1 | TERF1       |
| YY1 | TERF2IP     |
| YY1 | TES         |
| YY1 | TEX10       |
| YY1 | TEX264      |
| YY1 | TFB1M       |
| YY1 | TFDP2       |
| YY1 | TFEB        |
| YY1 | TFG         |
| YY1 | TFIP11      |
| YY1 | TGDS        |
| YY1 | TGFB1       |
| YY1 | TGOLN2      |
| YY1 | TGS1        |
| YY1 | THAP1       |
| YY1 | THAP11      |
| YY1 | THAP12      |
| YY1 | THAP2       |
| YY1 | THAP7       |
| YY1 | THG1L       |
| YY1 | THOC1       |
| YY1 | THOC2       |
| YY1 | THOC3       |
| YY1 | THOC7       |
| YY1 | THOP1       |
| YY1 | THRAP3      |
| YY1 | THUMPD3-AS1 |

|     |            |
|-----|------------|
| YY1 | TIA1       |
| YY1 | TIAL1      |
| YY1 | TIGD1      |
| YY1 | TIMM10     |
| YY1 | TIMM21     |
| YY1 | TIMM8A     |
| YY1 | TIMM8B     |
| YY1 | TIMMDC1    |
| YY1 | TINF2      |
| YY1 | TIPARP     |
| YY1 | TIPARP-AS1 |
| YY1 | TIPIN      |
| YY1 | TIPRL      |
| YY1 | TJAP1      |
| YY1 | TLE4       |
| YY1 | TLK2       |
| YY1 | TLN1       |
| YY1 | TM2D2      |
| YY1 | TM7SF2     |
| YY1 | TM9SF3     |
| YY1 | TM9SF4     |
| YY1 | TMA16      |
| YY1 | TMA7       |
| YY1 | TMBIM4     |
| YY1 | TMBIM6     |
| YY1 | TMC01      |
| YY1 | TMED7      |
| YY1 | TMED8      |
| YY1 | TMEM101    |
| YY1 | TMEM106C   |
| YY1 | TMEM109    |
| YY1 | TMEM11     |
| YY1 | TMEM116    |
| YY1 | TMEM123    |
| YY1 | TMEM126A   |
| YY1 | TMEM126B   |
| YY1 | TMEM131    |
| YY1 | TMEM134    |
| YY1 | TMEM14A    |
| YY1 | TMEM14B    |
| YY1 | TMEM160    |
| YY1 | TMEM165    |
| YY1 | TMEM167A   |
| YY1 | TMEM170A   |
| YY1 | TMEM183A   |
| YY1 | TMEM184B   |
| YY1 | TMEM186    |
| YY1 | TMEM203    |
| YY1 | TMEM219    |
| YY1 | TMEM222    |

|     |           |
|-----|-----------|
| YY1 | TMEM223   |
| YY1 | TMEM230   |
| YY1 | TMEM242   |
| YY1 | TMEM243   |
| YY1 | TMEM256   |
| YY1 | TMEM258   |
| YY1 | TMEM259   |
| YY1 | TMEM39B   |
| YY1 | TMEM44    |
| YY1 | TMEM50A   |
| YY1 | TMEM59    |
| YY1 | TMEM60    |
| YY1 | TMEM79    |
| YY1 | TMEM8A    |
| YY1 | TMF1      |
| YY1 | TMP0      |
| YY1 | TMSB10    |
| YY1 | TMSB4X    |
| YY1 | TMUB2     |
| YY1 | TMX1      |
| YY1 | TNFAIP8   |
| YY1 | TNFRSF14  |
| YY1 | TNIP1     |
| YY1 | TNKS2-AS1 |
| YY1 | TNP01     |
| YY1 | TNP02     |
| YY1 | TNP03     |
| YY1 | TNRC6B    |
| YY1 | TNS3      |
| YY1 | TOB2      |
| YY1 | TOMM20    |
| YY1 | TOMM22    |
| YY1 | TOMM34    |
| YY1 | TOMM40L   |
| YY1 | TOMM7     |
| YY1 | TOP1      |
| YY1 | TOP1MT    |
| YY1 | TOP2B     |
| YY1 | TOP3A     |
| YY1 | TOPBP1    |
| YY1 | TOPORS    |
| YY1 | TOR1A     |
| YY1 | TOR4A     |
| YY1 | TP53      |
| YY1 | TP53BP1   |
| YY1 | TP53RK    |
| YY1 | TPD52     |
| YY1 | TPD52L2   |
| YY1 | TPGS1     |
| YY1 | TPM3      |

|     |              |
|-----|--------------|
| YY1 | TPM4         |
| YY1 | TPR          |
| YY1 | TPRKB        |
| YY1 | TPT1         |
| YY1 | TPX2         |
| YY1 | TRA2A        |
| YY1 | TRA2B        |
| YY1 | TRABD        |
| YY1 | TRAF3IP1     |
| YY1 | TRAF3IP2-AS1 |
| YY1 | TRAF4        |
| YY1 | TRAF5        |
| YY1 | TRAF7        |
| YY1 | TRAK1        |
| YY1 | TRAPPC1      |
| YY1 | TRAPPC10     |
| YY1 | TRAPPC13     |
| YY1 | TRAPPC4      |
| YY1 | TRAPPC6A     |
| YY1 | TREML2       |
| YY1 | TRIM13       |
| YY1 | TRIM28       |
| YY1 | TRIM32       |
| YY1 | TRIM41       |
| YY1 | TRIM59       |
| YY1 | TRIOBP       |
| YY1 | TRIP4        |
| YY1 | TRMT10C      |
| YY1 | TRMT11       |
| YY1 | TRMT112      |
| YY1 | TRMT12       |
| YY1 | TRMT1L       |
| YY1 | TRMT2A       |
| YY1 | TRMT6        |
| YY1 | TRMT61B      |
| YY1 | TRMU         |
| YY1 | TROVE2       |
| YY1 | TRPM7        |
| YY1 | TRPV2        |
| YY1 | TRUB2        |
| YY1 | TSC1         |
| YY1 | TSC2         |
| YY1 | TSC22D4      |
| YY1 | TSEN34       |
| YY1 | TSG101       |
| YY1 | TSPAN14      |
| YY1 | TSP0         |
| YY1 | TSPYL5       |
| YY1 | TSR2         |
| YY1 | TSTD1        |



|     |           |
|-----|-----------|
| YY1 | TTC1      |
| YY1 | TTC13     |
| YY1 | TTC14     |
| YY1 | TTC30B    |
| YY1 | TTC32     |
| YY1 | TTF1      |
| YY1 | TTF2      |
| YY1 | TUBA1A    |
| YY1 | TUBA1B    |
| YY1 | TUBA1C    |
| YY1 | TUBA4A    |
| YY1 | TUBB      |
| YY1 | TUBGCP6   |
| YY1 | TUFM      |
| YY1 | TUSC2     |
| YY1 | TUT1      |
| YY1 | TWF1      |
| YY1 | TWF2      |
| YY1 | TXLNA     |
| YY1 | TXLNG     |
| YY1 | TXNDC12   |
| YY1 | TXNDC17   |
| YY1 | TXNDC9    |
| YY1 | TXNL1     |
| YY1 | TXNL4B    |
| YY1 | TXNRD1    |
| YY1 | TYMS      |
| YY1 | TYSND1    |
| YY1 | TYW3      |
| YY1 | U2AF1     |
| YY1 | U2AF2     |
| YY1 | U2SURP    |
| YY1 | UAP1L1    |
| YY1 | UBA1      |
| YY1 | UBA2      |
| YY1 | UBA3      |
| YY1 | UBA52     |
| YY1 | UBAC1     |
| YY1 | UBAC2     |
| YY1 | UBAC2-AS1 |
| YY1 | UBALD2    |
| YY1 | UBAP2     |
| YY1 | UBAP2L    |
| YY1 | UBB       |
| YY1 | UBC       |
| YY1 | UBE2A     |
| YY1 | UBE2B     |
| YY1 | UBE2D1    |
| YY1 | UBE2D2    |
| YY1 | UBE2D3    |

|     |          |
|-----|----------|
| YY1 | UBE2E1   |
| YY1 | UBE2E2   |
| YY1 | UBE2E3   |
| YY1 | UBE2F    |
| YY1 | UBE2G1   |
| YY1 | UBE2G2   |
| YY1 | UBE2H    |
| YY1 | UBE2I    |
| YY1 | UBE2J2   |
| YY1 | UBE2K    |
| YY1 | UBE2L3   |
| YY1 | UBE2L6   |
| YY1 | UBE2M    |
| YY1 | UBE2N    |
| YY1 | UBE2Q1   |
| YY1 | UBE2R2   |
| YY1 | UBE2S    |
| YY1 | UBE2T    |
| YY1 | UBE2V2   |
| YY1 | UBE2Z    |
| YY1 | UBE3A    |
| YY1 | UBE3B    |
| YY1 | UBIAD1   |
| YY1 | UBL3     |
| YY1 | UBL4A    |
| YY1 | UBL5     |
| YY1 | UBL7     |
| YY1 | UBL7-AS1 |
| YY1 | UBLCP1   |
| YY1 | UBN1     |
| YY1 | UBP1     |
| YY1 | UBR4     |
| YY1 | UBR5-AS1 |
| YY1 | UBR7     |
| YY1 | UBTD2    |
| YY1 | UBTF     |
| YY1 | UBXN1    |
| YY1 | UBXN2A   |
| YY1 | UBXN4    |
| YY1 | UCHL3    |
| YY1 | UCHL5    |
| YY1 | UCK1     |
| YY1 | UCKL1    |
| YY1 | UFC1     |
| YY1 | UFL1     |
| YY1 | UGCG     |
| YY1 | UGP2     |
| YY1 | UHRF1    |
| YY1 | UHRF2    |
| YY1 | UIMC1    |

|     |         |
|-----|---------|
| YY1 | UMPS    |
| YY1 | UNC45A  |
| YY1 | UNC50   |
| YY1 | UNG     |
| YY1 | UPF2    |
| YY1 | UPF3A   |
| YY1 | UPF3B   |
| YY1 | UQCC1   |
| YY1 | UQCC2   |
| YY1 | UQCC3   |
| YY1 | UQCR10  |
| YY1 | UQCR11  |
| YY1 | UQCRB   |
| YY1 | UQCRC1  |
| YY1 | UQCRC2  |
| YY1 | UQCRFS1 |
| YY1 | UQCRH   |
| YY1 | UQCRQ   |
| YY1 | URM1    |
| YY1 | UROD    |
| YY1 | USE1    |
| YY1 | USF2    |
| YY1 | USP1    |
| YY1 | USP10   |
| YY1 | USP12   |
| YY1 | USP13   |
| YY1 | USP14   |
| YY1 | USP15   |
| YY1 | USP16   |
| YY1 | USP22   |
| YY1 | USP24   |
| YY1 | USP28   |
| YY1 | USP3    |
| YY1 | USP34   |
| YY1 | USP39   |
| YY1 | USP47   |
| YY1 | USP48   |
| YY1 | USP5    |
| YY1 | USP53   |
| YY1 | USP7    |
| YY1 | USP8    |
| YY1 | UTP14A  |
| YY1 | UTP18   |
| YY1 | UTP20   |
| YY1 | UTP23   |
| YY1 | UTP6    |
| YY1 | UXT     |
| YY1 | VAMP1   |
| YY1 | VAMP2   |
| YY1 | VAMP5   |

|     |        |
|-----|--------|
| YY1 | VAMP8  |
| YY1 | VAPA   |
| YY1 | VASP   |
| YY1 | VAV1   |
| YY1 | VCP    |
| YY1 | VCPIP1 |
| YY1 | VCPKMT |
| YY1 | VDAC1  |
| YY1 | VDAC2  |
| YY1 | VDAC3  |
| YY1 | VEZF1  |
| YY1 | VHL    |
| YY1 | VIM    |
| YY1 | VKORC1 |
| YY1 | VMA21  |
| YY1 | VMP1   |
| YY1 | VOPP1  |
| YY1 | VPS13B |
| YY1 | VPS16  |
| YY1 | VPS26A |
| YY1 | VPS28  |
| YY1 | VPS29  |
| YY1 | VPS35  |
| YY1 | VPS37A |
| YY1 | VPS39  |
| YY1 | VPS41  |
| YY1 | VPS4A  |
| YY1 | VPS4B  |
| YY1 | VPS50  |
| YY1 | VPS51  |
| YY1 | VPS53  |
| YY1 | VRK1   |
| YY1 | VRK3   |
| YY1 | VTA1   |
| YY1 | VTI1A  |
| YY1 | VTI1B  |
| YY1 | WAC    |
| YY1 | WAPL   |
| YY1 | WARS2  |
| YY1 | WAS    |
| YY1 | WASF1  |
| YY1 | WASF2  |
| YY1 | WBP11  |
| YY1 | WBP1L  |
| YY1 | WBP2   |
| YY1 | WBP4   |
| YY1 | WDHD1  |
| YY1 | WDR1   |
| YY1 | WDR11  |
| YY1 | WDR13  |

|     |         |
|-----|---------|
| YY1 | WDR18   |
| YY1 | WDR33   |
| YY1 | WDR45B  |
| YY1 | WDR48   |
| YY1 | WDR59   |
| YY1 | WDR6    |
| YY1 | WDR61   |
| YY1 | WDR70   |
| YY1 | WDR82   |
| YY1 | WDR830S |
| YY1 | WDR89   |
| YY1 | WDR90   |
| YY1 | WEE1    |
| YY1 | WHAMM   |
| YY1 | WIPF1   |
| YY1 | WIPI2   |
| YY1 | WNK1    |
| YY1 | WRAP53  |
| YY1 | WRAP73  |
| YY1 | WRB     |
| YY1 | WRNIP1  |
| YY1 | WSB1    |
| YY1 | WTAP    |
| YY1 | XIAP    |
| YY1 | XPNPEP1 |
| YY1 | XPNPEP3 |
| YY1 | XP01    |
| YY1 | XPR1    |
| YY1 | XRCC1   |
| YY1 | XRCC2   |
| YY1 | XRCC3   |
| YY1 | XRCC5   |
| YY1 | XRCC6   |
| YY1 | XRN2    |
| YY1 | YAF2    |
| YY1 | YARS    |
| YY1 | YARS2   |
| YY1 | YBEY    |
| YY1 | YBX1    |
| YY1 | YDJC    |
| YY1 | YEATS2  |
| YY1 | YEATS4  |
| YY1 | YIPF4   |
| YY1 | YIPF6   |
| YY1 | YKT6    |
| YY1 | YLPM1   |
| YY1 | YME1L1  |
| YY1 | YPEL1   |
| YY1 | YPEL3   |
| YY1 | YPEL5   |

|     |            |
|-----|------------|
| YY1 | YTHDC1     |
| YY1 | YTHDC2     |
| YY1 | YTHDF2     |
| YY1 | YTHDF3-AS1 |
| YY1 | YWHAB      |
| YY1 | YWHAE      |
| YY1 | YWHAH      |
| YY1 | YWHAQ      |
| YY1 | YWHAZ      |
| YY1 | YY1        |
| YY1 | ZBED5      |
| YY1 | ZBTB1      |
| YY1 | ZBTB11     |
| YY1 | ZBTB2      |
| YY1 | ZBTB21     |
| YY1 | ZBTB25     |
| YY1 | ZBTB37     |
| YY1 | ZBTB7A     |
| YY1 | ZBTB80S    |
| YY1 | ZC3H12A    |
| YY1 | ZC3H13     |
| YY1 | ZC3H14     |
| YY1 | ZC3H8      |
| YY1 | ZC3HAV1    |
| YY1 | ZC3HC1     |
| YY1 | ZCCHC17    |
| YY1 | ZCCHC3     |
| YY1 | ZCCHC9     |
| YY1 | ZDHHC12    |
| YY1 | ZDHHC3     |
| YY1 | ZDHHC4     |
| YY1 | ZEB2       |
| YY1 | ZFAND1     |
| YY1 | ZFAND5     |
| YY1 | ZFAS1      |
| YY1 | ZFC3H1     |
| YY1 | ZFP36L1    |
| YY1 | ZFP64      |
| YY1 | ZFP82      |
| YY1 | ZFP91      |
| YY1 | ZFPL1      |
| YY1 | ZFR        |
| YY1 | ZFX        |
| YY1 | ZFYVE19    |
| YY1 | ZKSCAN1    |
| YY1 | ZMAT2      |
| YY1 | ZMAT5      |
| YY1 | ZMYND19    |
| YY1 | ZMYND8     |
| YY1 | ZNF106     |

|     |         |
|-----|---------|
| YY1 | ZNF121  |
| YY1 | ZNF143  |
| YY1 | ZNF148  |
| YY1 | ZNF207  |
| YY1 | ZNF22   |
| YY1 | ZNF24   |
| YY1 | ZNF248  |
| YY1 | ZNF264  |
| YY1 | ZNF28   |
| YY1 | ZNF281  |
| YY1 | ZNF292  |
| YY1 | ZNF318  |
| YY1 | ZNF32   |
| YY1 | ZNF322  |
| YY1 | ZNF326  |
| YY1 | ZNF335  |
| YY1 | ZNF35   |
| YY1 | ZNF367  |
| YY1 | ZNF395  |
| YY1 | ZNF408  |
| YY1 | ZNF428  |
| YY1 | ZNF430  |
| YY1 | ZNF444  |
| YY1 | ZNF48   |
| YY1 | ZNF480  |
| YY1 | ZNF500  |
| YY1 | ZNF506  |
| YY1 | ZNF511  |
| YY1 | ZNF512B |
| YY1 | ZNF544  |
| YY1 | ZNF566  |
| YY1 | ZNF574  |
| YY1 | ZNF579  |
| YY1 | ZNF580  |
| YY1 | ZNF581  |
| YY1 | ZNF593  |
| YY1 | ZNF622  |
| YY1 | ZNF638  |
| YY1 | ZNF639  |
| YY1 | ZNF664  |
| YY1 | ZNF668  |
| YY1 | ZNF669  |
| YY1 | ZNF680  |
| YY1 | ZNF687  |
| YY1 | ZNF706  |
| YY1 | ZNF714  |
| YY1 | ZNF726  |
| YY1 | ZNF75A  |
| YY1 | ZNF776  |
| YY1 | ZNF827  |

|        |             |
|--------|-------------|
| YY1    | ZNF837      |
| YY1    | ZNF85       |
| YY1    | ZNF879      |
| YY1    | ZNFX1       |
| YY1    | ZNHIT1      |
| YY1    | ZRANB1      |
| YY1    | ZRANB2      |
| YY1    | ZRANB3      |
| YY1    | ZSCAN16-AS1 |
| YY1    | ZSWIM7      |
| YY1    | ZW10        |
| YY1    | ZWILCH      |
| YY1    | ZWINT       |
| YY1    | ZXDC        |
| YY1    | ZYX         |
| YY1    | ZZEF1       |
| YY2    | AHCYL1      |
| YY2    | ARID5B      |
| YY2    | CN0T6       |
| YY2    | CXCR4       |
| YY2    | EGR2        |
| YY2    | ETS2        |
| YY2    | FAM53C      |
| YY2    | GLUL        |
| YY2    | IGFBP4      |
| YY2    | LCOR        |
| YY2    | NIPBL       |
| YY2    | RERE        |
| YY2    | SF3A1       |
| YY2    | SLC38A1     |
| YY2    | SP3         |
| YY2    | STAG2       |
| YY2    | TIA1        |
| YY2    | TRAK1       |
| YY2    | USP3        |
| YY2    | WDR33       |
| YY2    | ZSCAN18     |
| ZBTB18 | LINC00623   |
| ZBTB18 | LINC01588   |
| ZBTB18 | LTBP1       |
| ZBTB18 | RINL        |
| ZBTB18 | ZBTB18      |
| ZBTB33 | ACTN1       |
| ZBTB33 | AFTPH       |
| ZBTB33 | ARHGAP18    |
| ZBTB33 | ASB2        |
| ZBTB33 | BACE2       |
| ZBTB33 | C12orf29    |
| ZBTB33 | CAMK2G      |
| ZBTB33 | CAMLG       |



ZBTB33 CCNG1  
ZBTB33 DNPH1  
ZBTB33 DPYSL2  
ZBTB33 EEF1A1  
ZBTB33 FOXJ3  
ZBTB33 GART  
ZBTB33 GDI1  
ZBTB33 GPR137  
ZBTB33 HES1  
ZBTB33 HTT  
ZBTB33 KIAA0040  
ZBTB33 MED1  
ZBTB33 MTURN  
ZBTB33 NACA  
ZBTB33 NTPCR  
ZBTB33 PDPR  
ZBTB33 PFDN5  
ZBTB33 PPP1R18  
ZBTB33 PRNP  
ZBTB33 RCSD1  
ZBTB33 RNF2  
ZBTB33 RPL10A  
ZBTB33 RPL12  
ZBTB33 RPL15  
ZBTB33 RPL23  
ZBTB33 RPL26  
ZBTB33 RPL27A  
ZBTB33 RPL28  
ZBTB33 RPL29  
ZBTB33 RPL32  
ZBTB33 RPL34  
ZBTB33 RPL36  
ZBTB33 RPL37  
ZBTB33 RPL4  
ZBTB33 RPLP2  
ZBTB33 RPS21  
ZBTB33 RPS28  
ZBTB33 SEC22C  
ZBTB33 SKIL  
ZBTB33 STX12  
ZBTB33 TEX261  
ZBTB33 ZBTB33  
ZBTB7A SEMA4B  
ZNF134 ARRDC2  
ZNF134 DDX19A  
ZNF134 LIMK2  
ZNF134 TIMM8A  
ZNF134 ZNF800  
ZNF136 EPC2  
ZNF136 FKBP5

ZNF136 PKN2  
ZNF136 PLCL2  
ZNF136 SIPA1L1  
ZNF136 SLC25A53  
ZNF136 UPRT  
ZNF136 ZNF831  
ZNF143 ABHD14A  
ZNF143 ACAD9  
ZNF143 ACY3  
ZNF143 AFF4  
ZNF143 AKAP9  
ZNF143 ALG13  
ZNF143 AP4M1  
ZNF143 APBB3  
ZNF143 APOLD1  
ZNF143 APTX  
ZNF143 AQP3  
ZNF143 ARHGAP18  
ZNF143 ARL17A  
ZNF143 ARMCX3  
ZNF143 ARRDC3  
ZNF143 ARSG  
ZNF143 ASB3  
ZNF143 ATAD1  
ZNF143 ATF6B  
ZNF143 ATG4C  
ZNF143 AZIN1  
ZNF143 B9D1  
ZNF143 BAG5  
ZNF143 BANP  
ZNF143 BAX  
ZNF143 BBC3  
ZNF143 C19orf25  
ZNF143 C19orf38  
ZNF143 C2CD2L  
ZNF143 C3orf14  
ZNF143 CALCOC01  
ZNF143 CBR4  
ZNF143 CBX6  
ZNF143 CBX8  
ZNF143 CCDC174  
ZNF143 CCDC93  
ZNF143 CCNL1  
ZNF143 CD2AP  
ZNF143 CDC42SE2  
ZNF143 CDCA5  
ZNF143 CEBPG  
ZNF143 CENPQ  
ZNF143 CFAP20  
ZNF143 CHST12

|        |          |
|--------|----------|
| ZNF143 | CLCN6    |
| ZNF143 | CLDN14   |
| ZNF143 | CLDND1   |
| ZNF143 | CLTC     |
| ZNF143 | CMAS     |
| ZNF143 | CPEB4    |
| ZNF143 | CPSF7    |
| ZNF143 | CRTAP    |
| ZNF143 | CSDE1    |
| ZNF143 | CTDSPL2  |
| ZNF143 | CTHRC1   |
| ZNF143 | CTU1     |
| ZNF143 | CWF19L1  |
| ZNF143 | CXorf56  |
| ZNF143 | DCUN1D4  |
| ZNF143 | DEDD2    |
| ZNF143 | DEPDC5   |
| ZNF143 | DERA     |
| ZNF143 | DHX15    |
| ZNF143 | DIAPH1   |
| ZNF143 | DLGAP4   |
| ZNF143 | DMTF1    |
| ZNF143 | DMXL1    |
| ZNF143 | DNAJB4   |
| ZNF143 | DNAJC4   |
| ZNF143 | DPY19L4  |
| ZNF143 | DVL2     |
| ZNF143 | EIF2AK3  |
| ZNF143 | ELP5     |
| ZNF143 | EPM2AIP1 |
| ZNF143 | ERCC1    |
| ZNF143 | ESC01    |
| ZNF143 | EXOC7    |
| ZNF143 | FAM122C  |
| ZNF143 | FAM131C  |
| ZNF143 | FAM208B  |
| ZNF143 | FAM72D   |
| ZNF143 | FAM78A   |
| ZNF143 | FBX022   |
| ZNF143 | FBX07    |
| ZNF143 | FCF1     |
| ZNF143 | FNDC3B   |
| ZNF143 | GANAB    |
| ZNF143 | GART     |
| ZNF143 | GATAD2A  |
| ZNF143 | GATB     |
| ZNF143 | GEMIN5   |
| ZNF143 | GLYR1    |
| ZNF143 | GOLGA2   |
| ZNF143 | GOLGA8B  |

ZNF143 GPN2  
ZNF143 GPR107  
ZNF143 HAUS1  
ZNF143 HDAC10  
ZNF143 HECTD1  
ZNF143 HP1BP3  
ZNF143 IFT20  
ZNF143 IL13RA1  
ZNF143 INO80  
ZNF143 INO80E  
ZNF143 ISOC2  
ZNF143 KANSL1  
ZNF143 KCTD13  
ZNF143 KDM4B  
ZNF143 KIF13A  
ZNF143 KLHL18  
ZNF143 KMT2B  
ZNF143 KMT2E-AS1  
ZNF143 KNSTRN  
ZNF143 LAX1  
ZNF143 LIMK2  
ZNF143 LIN54  
ZNF143 LINC00891  
ZNF143 LINC01588  
ZNF143 LNPEP  
ZNF143 LPIN1  
ZNF143 LRRC8D  
ZNF143 LTA4H  
ZNF143 LYL1  
ZNF143 MAP2K5  
ZNF143 MAP3K14  
ZNF143 MAPK9  
ZNF143 MAPRE2  
ZNF143 MAST2  
ZNF143 MAST3  
ZNF143 MAST4  
ZNF143 MECP2  
ZNF143 MED17  
ZNF143 MED25  
ZNF143 MED6  
ZNF143 METTL18  
ZNF143 METTL23  
ZNF143 MLLT10  
ZNF143 MTA2  
ZNF143 MTHFD2L  
ZNF143 MYO19  
ZNF143 N4BP2L1  
ZNF143 NDE1  
ZNF143 NETO1  
ZNF143 NOTCH2

ZNF143 NSMAF  
ZNF143 NUDT4  
ZNF143 NUMA1  
ZNF143 OXSR1  
ZNF143 P2RX5  
ZNF143 PANK3  
ZNF143 PARP14  
ZNF143 PAWR  
ZNF143 PCM1  
ZNF143 PDCD11  
ZNF143 PGP  
ZNF143 PHF20  
ZNF143 PHTF2  
ZNF143 PITPNA-AS1  
ZNF143 PITPNC1  
ZNF143 PLD3  
ZNF143 POLB  
ZNF143 POLR3A  
ZNF143 POLR3C  
ZNF143 POU3F1  
ZNF143 PPP4R3B  
ZNF143 PRIM2  
ZNF143 PRKAR2B  
ZNF143 PTBP3  
ZNF143 RANGRF  
ZNF143 RASGRF1  
ZNF143 RASSF7  
ZNF143 RBM41  
ZNF143 RBM7  
ZNF143 RDX  
ZNF143 RFX3  
ZNF143 RGS19  
ZNF143 RNF169  
ZNF143 RPAP1  
ZNF143 RPS27L  
ZNF143 RTCA  
ZNF143 SAE1  
ZNF143 SAMSN1  
ZNF143 SAPCD2  
ZNF143 SEC24C  
ZNF143 SEMA4D  
ZNF143 SETD3  
ZNF143 SETX  
ZNF143 SFT2D1  
ZNF143 SGK3  
ZNF143 SIN3B  
ZNF143 SKIL  
ZNF143 SKIV2L  
ZNF143 SLC10A3  
ZNF143 SLC25A13

|        |          |
|--------|----------|
| ZNF143 | SLC25A17 |
| ZNF143 | SLC26A2  |
| ZNF143 | SLC29A1  |
| ZNF143 | SLC2A13  |
| ZNF143 | SLC31A2  |
| ZNF143 | SLC37A4  |
| ZNF143 | SLC39A3  |
| ZNF143 | SLC39A9  |
| ZNF143 | SLC43A2  |
| ZNF143 | SLMAP    |
| ZNF143 | SMCR8    |
| ZNF143 | SMG5     |
| ZNF143 | SMIM20   |
| ZNF143 | SMNDC1   |
| ZNF143 | SNAPC5   |
| ZNF143 | SQSTM1   |
| ZNF143 | ST3GAL2  |
| ZNF143 | STIM1    |
| ZNF143 | STX3     |
| ZNF143 | SUCLG1   |
| ZNF143 | SYNJ2BP  |
| ZNF143 | TBXAS1   |
| ZNF143 | TCHP     |
| ZNF143 | TEX264   |
| ZNF143 | TFEB     |
| ZNF143 | THAP2    |
| ZNF143 | TMC01    |
| ZNF143 | TMEM167A |
| ZNF143 | TMEM206  |
| ZNF143 | TMEM216  |
| ZNF143 | TMEM242  |
| ZNF143 | TNRC6B   |
| ZNF143 | TRAIP    |
| ZNF143 | TRAK1    |
| ZNF143 | TRIM56   |
| ZNF143 | TRMT12   |
| ZNF143 | TRMT1L   |
| ZNF143 | TSG101   |
| ZNF143 | TSPAN31  |
| ZNF143 | TTC21B   |
| ZNF143 | TTC9C    |
| ZNF143 | TTN      |
| ZNF143 | UACA     |
| ZNF143 | UBE4B    |
| ZNF143 | UHMK1    |
| ZNF143 | USP28    |
| ZNF143 | WDFY1    |
| ZNF143 | WDR25    |
| ZNF143 | WDR59    |
| ZNF143 | YIPF5    |

|        |          |
|--------|----------|
| ZNF143 | YPEL1    |
| ZNF143 | ZDHHC17  |
| ZNF143 | ZFAND6   |
| ZNF143 | ZFPL1    |
| ZNF143 | ZMAT5    |
| ZNF143 | ZNF143   |
| ZNF143 | ZNF181   |
| ZNF143 | ZNF230   |
| ZNF143 | ZNF680   |
| ZNF143 | ZYX      |
| ZNF235 | CLEC2B   |
| ZNF235 | PREPL    |
| ZNF235 | ZNF226   |
| ZNF274 | AAAS     |
| ZNF274 | ACLY     |
| ZNF274 | ADD1     |
| ZNF274 | ASTE1    |
| ZNF274 | BBS4     |
| ZNF274 | C12orf66 |
| ZNF274 | CCPG1    |
| ZNF274 | CELF2    |
| ZNF274 | CHMP1A   |
| ZNF274 | CYTH1    |
| ZNF274 | DNAJB9   |
| ZNF274 | EPB41    |
| ZNF274 | EPC1     |
| ZNF274 | EPHB6    |
| ZNF274 | FBXL12   |
| ZNF274 | FEM1A    |
| ZNF274 | FKBP15   |
| ZNF274 | G6PD     |
| ZNF274 | GXYLT1   |
| ZNF274 | IGFBP4   |
| ZNF274 | JAK2     |
| ZNF274 | JARID2   |
| ZNF274 | JUNB     |
| ZNF274 | KRAS     |
| ZNF274 | MAN1A1   |
| ZNF274 | MANF     |
| ZNF274 | MAP1S    |
| ZNF274 | MEX3C    |
| ZNF274 | NMNAT1   |
| ZNF274 | PACSLN2  |
| ZNF274 | PDE4D    |
| ZNF274 | POLR2A   |
| ZNF274 | PSENEN   |
| ZNF274 | PTDSS2   |
| ZNF274 | RABEPK   |
| ZNF274 | RASA4    |
| ZNF274 | RIC8B    |

|        |            |
|--------|------------|
| ZNF274 | RNF38      |
| ZNF274 | RPAP2      |
| ZNF274 | RPL38      |
| ZNF274 | RPS27      |
| ZNF274 | RPS29      |
| ZNF274 | RRNAD1     |
| ZNF274 | RUNX1      |
| ZNF274 | SARAF      |
| ZNF274 | SEMA4B     |
| ZNF274 | SH2B1      |
| ZNF274 | SLC1A5     |
| ZNF274 | SLC25A38   |
| ZNF274 | SLC35A3    |
| ZNF274 | SLC35A5    |
| ZNF274 | SLC38A10   |
| ZNF274 | SNX25      |
| ZNF274 | STAT6      |
| ZNF274 | TM9SF4     |
| ZNF274 | TMEM62     |
| ZNF274 | TSC2       |
| ZNF274 | TSC22D2    |
| ZNF274 | VTA1       |
| ZNF274 | WDYHV1     |
| ZNF274 | ZFYVE16    |
| ZNF274 | ZNF213     |
| ZNF274 | ZNF274     |
| ZNF274 | ZNF395     |
| ZNF274 | ZNF518A    |
| ZNF274 | ZNF644     |
| ZNF274 | ZNHIT2     |
| ZNF274 | ZSCAN32    |
| ZNF425 | EDEM1      |
| ZNF425 | ELL2       |
| ZNF425 | FAM174A    |
| ZNF425 | FAM214A    |
| ZNF425 | MTRF1L     |
| ZNF425 | SERINC5    |
| ZNF425 | STXBP6     |
| ZNF76  | ADORA2A    |
| ZNF76  | APEX2      |
| ZNF76  | ARHGAP17   |
| ZNF76  | ARHGAP44   |
| ZNF76  | ARHGEF3    |
| ZNF76  | ARV1       |
| ZNF76  | ASF1B      |
| ZNF76  | ATP13A2    |
| ZNF76  | ATP2A1-AS1 |
| ZNF76  | B3GALT4    |
| ZNF76  | BIK        |
| ZNF76  | BLOC1S5    |



|       |         |
|-------|---------|
| ZNF76 | C2orf49 |
| ZNF76 | C6orf99 |
| ZNF76 | C8orf76 |
| ZNF76 | CAND1   |
| ZNF76 | CAPN15  |
| ZNF76 | CARF    |
| ZNF76 | CCNF    |
| ZNF76 | CENPJ   |
| ZNF76 | CEP85L  |
| ZNF76 | CHAF1A  |
| ZNF76 | CHCHD1  |
| ZNF76 | CHEK2   |
| ZNF76 | CKAP4   |
| ZNF76 | CNKSR1  |
| ZNF76 | CNOT4   |
| ZNF76 | COA1    |
| ZNF76 | DAPK2   |
| ZNF76 | DDX3X   |
| ZNF76 | DOCK2   |
| ZNF76 | E2F1    |
| ZNF76 | EDRF1   |
| ZNF76 | EPC2    |
| ZNF76 | EPS15L1 |
| ZNF76 | ERCC6L2 |
| ZNF76 | EXOSC10 |
| ZNF76 | EXOSC6  |
| ZNF76 | EYA3    |
| ZNF76 | FAM131C |
| ZNF76 | FAM210A |
| ZNF76 | FBX046  |
| ZNF76 | FBX07   |
| ZNF76 | FES     |
| ZNF76 | FICD    |
| ZNF76 | FLI1    |
| ZNF76 | FLNA    |
| ZNF76 | GABPA   |
| ZNF76 | GALNT6  |
| ZNF76 | GEMIN6  |
| ZNF76 | GID4    |
| ZNF76 | GM2A    |
| ZNF76 | GNAZ    |
| ZNF76 | GSK3A   |
| ZNF76 | GSTA4   |
| ZNF76 | GTF2H2  |
| ZNF76 | GTPBP8  |
| ZNF76 | HDAC8   |
| ZNF76 | HIPK1   |
| ZNF76 | IL6R    |
| ZNF76 | IRF2BP2 |
| ZNF76 | KCNK12  |

|       |          |
|-------|----------|
| ZNF76 | KLHL24   |
| ZNF76 | KPNA3    |
| ZNF76 | KRR1     |
| ZNF76 | LCOR     |
| ZNF76 | LEMD2    |
| ZNF76 | LRPPRC   |
| ZNF76 | MAP2K6   |
| ZNF76 | MBTPS1   |
| ZNF76 | MCTP2    |
| ZNF76 | MEN1     |
| ZNF76 | MICAL3   |
| ZNF76 | MOCS3    |
| ZNF76 | MYH9     |
| ZNF76 | NAXD     |
| ZNF76 | NDUFA7   |
| ZNF76 | NFKBIB   |
| ZNF76 | NLK      |
| ZNF76 | NME7     |
| ZNF76 | NOL11    |
| ZNF76 | NUDT3    |
| ZNF76 | NUDT9    |
| ZNF76 | OGFOD1   |
| ZNF76 | OSBPL2   |
| ZNF76 | PAQR8    |
| ZNF76 | PEX14    |
| ZNF76 | PHTF1    |
| ZNF76 | PLEKH01  |
| ZNF76 | POMGNT1  |
| ZNF76 | PPP1R12B |
| ZNF76 | PRDM1    |
| ZNF76 | PRDM15   |
| ZNF76 | PTBP3    |
| ZNF76 | QPRT     |
| ZNF76 | QRICH1   |
| ZNF76 | RABL6    |
| ZNF76 | RASSF2   |
| ZNF76 | RBM14    |
| ZNF76 | RELT     |
| ZNF76 | RNF144B  |
| ZNF76 | ROCK2    |
| ZNF76 | SAP130   |
| ZNF76 | SDHAF1   |
| ZNF76 | SERP2    |
| ZNF76 | SH3TC1   |
| ZNF76 | SLAMF6   |
| ZNF76 | SLC20A1  |
| ZNF76 | SLC29A3  |
| ZNF76 | SLC38A9  |
| ZNF76 | SMIM19   |
| ZNF76 | SNHG21   |

|       |          |
|-------|----------|
| ZNF76 | SNRPA    |
| ZNF76 | SNTB2    |
| ZNF76 | STAU1    |
| ZNF76 | STK26    |
| ZNF76 | TAF8     |
| ZNF76 | TCAF1    |
| ZNF76 | TEX30    |
| ZNF76 | TGDS     |
| ZNF76 | THOP1    |
| ZNF76 | TIGAR    |
| ZNF76 | TIMM23   |
| ZNF76 | TOX      |
| ZNF76 | TP53TG1  |
| ZNF76 | TPCN2    |
| ZNF76 | TRAF3IP1 |
| ZNF76 | TRAIP    |
| ZNF76 | TRAPPC13 |
| ZNF76 | UBAC1    |
| ZNF76 | UNK      |
| ZNF76 | VPS52    |
| ZNF76 | WDFY4    |
| ZNF76 | WDR34    |
| ZNF76 | WRAP53   |
| ZNF76 | WTAP     |
| ZNF76 | XP06     |
| ZNF76 | ZCCHC7   |
| ZNF76 | ZNF148   |
| ZNF76 | ZNF317   |
| ZNF76 | ZNF444   |
| ZNF76 | ZNF76    |
| ZNF76 | ZNF780B  |
| ZXDB  | GPRC5C   |
| ZXDB  | PIK3CD   |
| ZXDB  | RNF2     |
| ZXDB  | TNFRSF1B |
