# Supplementary material for: Distinct stage-specific transcriptional states of B cells derived from human tonsillar tissue
Source: PubMed Central journal article supplement (PMC10132144; doi:10.1172/jci.insight.155199), 2023-04-10
Supplement: jciinsight-8-155199-s234.pdf [file jciinsight-8-155199-s234.pdf]

| gene               | waldStat           | df | pvalue               | meanLogFC         |
|--------------------|--------------------|----|----------------------|-------------------|
| AL669831.5         | 1.73940096115019   | 2  | 0.419077052169076    |                   |
| 0.623181363715432  |                    |    |                      |                   |
| LINC00115          | 0.779324906570484  | 2  | 0.677285451397376    |                   |
| 0.654162571461824  |                    |    |                      |                   |
| NOC2L              | 4.41776065950463   | 2  | 0.109823545857215    |                   |
| 0.331839125148629  |                    |    |                      |                   |
| ISG15              | 8.45015879161615   | 2  | 0.0146241735654222   |                   |
| 0.460082609627823  |                    |    |                      |                   |
| C1orf159           | 0.180743605812028  | 2  | 0.913591446162555    |                   |
| 0.424203432400884  |                    |    |                      |                   |
| TNFRSF18           | 27.3781339160999   | 2  | 1.13478544738754e-06 |                   |
| 2.34621054023136   |                    |    |                      |                   |
| SDF4               | 1.53048104386959   | 2  | 0.465222021415801    |                   |
| 0.246686230198593  |                    |    |                      |                   |
| B3GALT6            | 0.142193081865845  | 2  | 0.931371972268088    |                   |
| 0.167828335412873  |                    |    |                      |                   |
| UBE2J2             | 1.92636163788977   | 2  | 0.38167690795773     | 0.132234614252536 |
| ACAP3              | 5.47996003144414   | 2  | 0.0645716372978207   |                   |
| 1.47711759565409   |                    |    |                      |                   |
| PUSL1              | 0.930693264681093  | 2  | 0.627917410980056    |                   |
| 0.364298047856842  |                    |    |                      |                   |
| INTS11             | 16.1623779285488   | 2  | 0.000309303066415079 |                   |
| 0.603330895256006  |                    |    |                      |                   |
| CPTP               | 10.9585044766929   | 2  | 0.00417244852869891  |                   |
| 0.718162602080155  |                    |    |                      |                   |
| TAS1R3             | 1.59002851132354   | 2  | 0.451574797379132    |                   |
| 1.07201857567995   |                    |    |                      |                   |
| DVL1               | 0.0384132906809357 | 2  | 0.980976627047298    |                   |
| 0.188628688642065  |                    |    |                      |                   |
| AURKAIP1           | 23.0775911741689   | 2  | 9.74461642411217e-06 |                   |
| 0.231946704577756  |                    |    |                      |                   |
| CCNL2              | 1.92072376053316   | 2  | 0.382754349663754    |                   |
| 0.13795362693411   |                    |    |                      |                   |
| MRPL20             | 2.41283017861078   | 2  | 0.299268208491615    |                   |
| 0.138448827096095  |                    |    |                      |                   |
| ATAD3B             | 0.0471505989049534 | 2  | 0.976700426892446    |                   |
| 0.0858307234033682 |                    |    |                      |                   |
| ATAD3A             | 4.38165312608299   | 2  | 0.111824280589789    |                   |
| 0.615947283598747  |                    |    |                      |                   |
| SSU72              | 0.243586863968168  | 2  | 0.885331230730994    |                   |
| 0.0421837595569917 |                    |    |                      |                   |
| AL645728.1         | 0.466842618474085  | 2  | 0.791819902200973    |                   |
| 0.481195363574131  |                    |    |                      |                   |
| AL691432.2         | 1.11136541409841   | 2  | 0.573680471770882    |                   |
| 0.909530638650177  |                    |    |                      |                   |
| MIB2               | 5.57424907923668   | 2  | 0.0615980823494279   |                   |
| 0.598048641990712  |                    |    |                      |                   |
| CDK11B             | 1.30346977361732   | 2  | 0.521140871610368    |                   |
| 0.20751082335141   |                    |    |                      |                   |

|                                  |                                   |
|----------------------------------|-----------------------------------|
| SLC35E2B 3.4851318452042 2       | 0.175070606169579                 |
| 0.723321588635796                |                                   |
| CDK11A 0.00210515310548891 2     | 0.998947977211645                 |
| 0.0101775869834333               |                                   |
| SLC35E2A 1.60602406665659 2      | 0.447977606490702                 |
| 0.695787890925631                |                                   |
| NADK 9.69722289893165 2          | 0.00783925519738782               |
| 0.414659438830642                |                                   |
| GNB1 7.21698014739803 2          | 0.0270927240143983                |
| 0.217059446670497                |                                   |
| PRKCZ 1.01761803467523 2         | 0.601211184687979                 |
| 0.329060435895135                |                                   |
| FAAP20 1.10665774737957 2        | 0.575032410498019                 |
| 0.19270134573102                 |                                   |
| MORN1 0.00470101815510081 2      | 0.997652251205797                 |
| 0.0621931542150357               |                                   |
| RER1 11.1285992716751 2          | 0.00383226358565891               |
| 0.231050180557001                |                                   |
| PEX10 0.00783984448277221 2      | 0.996087750624849                 |
| 0.0274749357407188               |                                   |
| PANK4 0.440840177824683 2        | 0.802181739515724                 |
| 0.0963491176079054               |                                   |
| AL139246.5 6.01686693219447 2    | 0.0493689563595505                |
| 1.91358894002851                 |                                   |
| TNFRSF14-AS1 0.473499654005278 2 | 0.789188697025197                 |
| 0.241423580711263                |                                   |
| TNFRSF14 0.589809924895027 2     | 0.744602349288193                 |
| 0.136394340019794                |                                   |
| AL139246.3 0.0340133005238877 2  | 0.983137146493618                 |
| 0.127095743732825                |                                   |
| FAM213B 3.07350338443875 2       | 0.215078609473856                 |
| 1.29186401618246                 |                                   |
| TPRG1L 2.34017593790394 2        | 0.310339639811793                 |
| 0.531787824552472                |                                   |
| WRAP73 15.4357068816907 2        | 0.000444814400269444              |
| 0.653850971018505                |                                   |
| SMIM1 0.191305361136746 2        | 0.90877959807513                  |
| 0.377951012744528                |                                   |
| LRRC47 0.26724857109794 2        | 0.874918722466221                 |
| 0.0962582730364654               |                                   |
| CEP104 1.84747651758123 2        | 0.39703205487725 0.13476550990656 |
| DFFB 2.16797008633856 2          | 0.338244915721944                 |
| 1.01296628614639                 |                                   |
| C1orf174 3.12146503500365 2      | 0.209982199214687                 |
| 0.599043699906528                |                                   |
| LINC01134 1.63379059881647 2     | 0.441801187819724                 |
| 0.661219048181836                |                                   |
| KCNAB2 2.3588906180215 2         | 0.307449230629447                 |
| 0.255071147165406                |                                   |
| RPL22 54.958642463494 2          | 1.16384679671455e-12              |

|                               |   |                      |
|-------------------------------|---|----------------------|
| 0.313660550464476             |   |                      |
| ICMT 1.47104296457877 2       |   | 0.479255470558306    |
| 0.594237214657511             |   |                      |
| ACOT7 2.13972726787556 2      |   | 0.343055295328922    |
| 0.584113752349751             |   |                      |
| NOL9 17.3328715896379 2       |   | 0.000172272024130504 |
| 1.58285855914773              |   |                      |
| ZBTB48 4.55091035828186 2     |   | 0.102750128074344    |
| 0.798007270975348             |   |                      |
| PHF13 4.11417486256084 2      |   | 0.127825729465566    |
| 1.17104942343094              |   |                      |
| THAP3 8.65873037554116 2      |   | 0.0131759090639918   |
| 0.695723237359492             |   |                      |
| DNAJC11 3.35703684416541 2    |   | 0.186650308259979    |
| 0.647900427451885             |   |                      |
| CAMTA1 3.59805903518622 2     |   | 0.165459385751902    |
| 0.196867160353168             |   |                      |
| VAMP3 2.3953019699507 2       |   | 0.301902553267854    |
| 0.62765561376817              |   |                      |
| PARK7 0.0749263786464791      | 2 | 0.963229874211775    |
| 0.0181198749615941            |   |                      |
| RERE 1.26322096494514 2       |   | 0.531734761555087    |
| 0.256930525852795             |   |                      |
| EN01 24.5919703907351 2       |   | 4.57005556098178e-06 |
| 0.167585274937489             |   |                      |
| SLC2A5 80.313452797267 2      | 0 | 2.1584724629917      |
| GPR157 0.00551114095467685    | 2 | 0.997248222622139    |
| 0.0755394238236158            |   |                      |
| H6PD 0.119045610932255        | 2 | 0.942214045715706    |
| 0.067195441470261             |   |                      |
| SPSB1 2.66678470170433 2      |   | 0.263581581725719    |
| 0.337026682647423             |   |                      |
| SLC25A33 3.26335558719511 2   |   | 0.195601120357732    |
| 0.404824496575265             |   |                      |
| PIK3CD 0.356699271959373      | 2 | 0.836649849454775    |
| 0.147619674276405             |   |                      |
| PIK3CD-AS1 0.71815444010536 2 |   | 0.698320424929499    |
| 0.764868952353039             |   |                      |
| PIK3CD-AS2 3.83885305570337 2 |   | 0.146691061251828    |
| 0.409325908027109             |   |                      |
| CLSTN1 0.982409154246218      | 2 | 0.61188888272886     |
| 0.291392512077255             |   |                      |
| CTNNBIP1 1.03257257637076 2   |   | 0.596732530744264    |
| 0.300169337351292             |   |                      |
| LZIC 8.1714219323056 2        |   | 0.0168111828841387   |
| 0.76655025521383              |   |                      |
| NMNAT1 1.81906286554418 2     |   | 0.402712877888513    |
| 0.605679729246459             |   |                      |
| UBE4B 0.177422223985335       | 2 | 0.9151098996677      |
| 0.107242534940832             |   |                      |

|            |                    |   |                      |
|------------|--------------------|---|----------------------|
| PGD        | 0.883176470497904  | 2 | 0.643014351595808    |
|            | 0.201526176573235  |   |                      |
| CENPS      | 1.9726952844788    | 2 | 0.372936303417196    |
|            | 0.491303675164538  |   |                      |
| DFFA       | 10.1241358236962   | 2 | 0.00633245101349145  |
|            | 0.293632224016342  |   |                      |
| PEX14      | 0.0781168010820011 | 2 | 0.961694544024698    |
|            | 0.111724330123803  |   |                      |
| CASZ1      | 0.446511690978769  | 2 | 0.799910169703664    |
|            | 0.342461359001362  |   |                      |
| TARDBP     | 6.38684626201462   | 2 | 0.041031175178425    |
|            | 0.396497645604223  |   |                      |
| SRM        | 7.30173817692852   | 2 | 0.0259685500014593   |
|            | 0.259895436412863  |   |                      |
| EXOSC10    | 2.77154566629602   | 2 | 0.25013041599781     |
| AL109811.2 | 2.29301035197408   | 2 | 0.360385872555977    |
|            | 1.68304871781109   |   | 0.317745295086921    |
| MTOR       | 3.26593689156293   | 2 | 0.195348830189018    |
|            | 2.21233486775629   |   |                      |
| UBIAD1     | 1.87633196121511   | 2 | 0.391344911748803    |
|            | 0.413558912842575  |   |                      |
| FBX02      | 4.92477012053979   | 2 | 0.0852314262659276   |
|            | 4.38724786641993   |   |                      |
| FBX044     | 0.158667634896863  | 2 | 0.923731515274305    |
|            | 0.161362958427209  |   |                      |
| FBX06      | 1.24132105425108   | 2 | 0.537589228027302    |
|            | 0.777364233112098  |   |                      |
| MAD2L2     | 2.40234838571678   | 2 | 0.300840759370921    |
|            | 0.383691055779195  |   |                      |
| AGTRAP     | 0.0325163169614791 | 2 | 0.98387329203264     |
|            | 0.0749394104180268 |   |                      |
| MTHFR      | 0.0737965842475602 | 2 | 0.963774153786683    |
|            | 0.0800990401591109 |   |                      |
| CLCN6      | 2.00807847252785   | 2 | 0.366396486210891    |
|            | 0.406553446460174  |   |                      |
| NPPA-AS1   | 2.21136313192008   | 2 | 0.330985217090628    |
|            | 4.1387450345145    |   |                      |
| KIAA2013   | 0.47632458347122   | 2 | 0.788074782690539    |
|            | 0.149928276196512  |   |                      |
| PLOD1      | 0.453779688788759  | 2 | 0.797008572416743    |
|            | 0.225715761968995  |   |                      |
| MFN2       | 2.32125321942079   | 2 | 0.313289808928302    |
|            | 0.726971474250491  |   |                      |
| MIIP       | 2.7514798260872    | 2 | 0.252652585684018    |
|            | 0.275923061791141  |   |                      |
| TNFRSF1B   | 4.36092884783154   | 2 | 0.112989043639198    |
|            | 1.94787992000054   |   |                      |
| VPS13D     | 0.0419081004279559 | 2 | 0.979263960505119    |
|            | 0.113014682176817  |   |                      |
| PRDM2      | 22.9801870195436   | 2 | 1.02309459937278e-05 |

|                    |                      |   |                                    |
|--------------------|----------------------|---|------------------------------------|
| 0.310267176005116  |                      |   |                                    |
| EFHD2              | 2.19657042807952     | 2 | 0.33344237604103 0.378595037181512 |
| CASP9              | 1.40618146108373     | 2 | 0.495052861828832                  |
| 0.408434876580998  |                      |   |                                    |
| DNAJC16            | 0.0328887636876505   | 2 | 0.983690088898229                  |
| 0.0799123110781106 |                      |   |                                    |
| AGMAT              | 10.6310912919608     | 2 | 0.00491459639383618                |
| 0.60453236617521   |                      |   |                                    |
| DDI2               | 2.01909044937121     | 2 | 0.364384655042169                  |
| 0.773463412040443  |                      |   |                                    |
| PLEKHM2            | 2.00006805881746     | 2 | 0.367866922664576                  |
| 0.722832438106316  |                      |   |                                    |
| UQCRHL             | 0.77783693852122     | 2 | 0.677789528442715                  |
| 0.368618112549229  |                      |   |                                    |
| AL450998.2         | 3.80984463598784     | 2 | 0.148834203912616                  |
| 0.994093155204605  |                      |   |                                    |
| SPEN               | 0.691374643765031    | 2 | 0.707733745368573                  |
| 0.1377401175545    |                      |   |                                    |
| ZBTB17             | 0.178743915646251    | 2 | 0.914505352884205                  |
| 0.161910656794     |                      |   |                                    |
| ARHGEF19           | 1.43978188278451     | 2 | 0.486805343378092                  |
| 0.52536560979239   |                      |   |                                    |
| FBX042             | 3.47330864527506     | 2 | 0.176108618693256                  |
| 0.521984640843691  |                      |   |                                    |
| SZRD1              | 0.331300717987984    | 2 | 0.847342448068099                  |
| 0.0966331213699599 |                      |   |                                    |
| NECAP2             | 0.685832971651288    | 2 | 0.709697478884335                  |
| 0.047481546394673  |                      |   |                                    |
| AL137802.2         | 0.000791906771333579 | 2 | 0.99960412499353                   |
| 0.0266933315990441 |                      |   |                                    |
| NBPF1              | 2.29676869945676     | 2 | 0.317148757146722                  |
| 0.867954937165591  |                      |   |                                    |
| CROCC              | 0.00155791165047605  | 2 | 0.999221347482091                  |
| 0.0373017899188054 |                      |   |                                    |
| BX284668.5         | 1.77732841009952     | 2 | 0.411204671172765                  |
| 0.516941327874022  |                      |   |                                    |
| ATP13A2            | 3.48613386554182     | 2 | 0.1749829159843 0.851842777108657  |
| SDHB               | 1.00563748670641     | 2 | 0.604823412722991                  |
| 0.109757005036309  |                      |   |                                    |
| PADI2              | 3.50067030625477     | 2 | 0.173715712328556                  |
| 1.69782698132172   |                      |   |                                    |
| PADI4              | 2.61092691019451     | 2 | 0.271046887870158                  |
| 0.969517429616259  |                      |   |                                    |
| RCC2               | 3.36567674929802     | 2 | 0.185845726909701                  |
| 0.495878627830819  |                      |   |                                    |
| ALDH4A1            | 2.89602694828259     | 2 | 0.235036731184017                  |
| 1.26454910637439   |                      |   |                                    |
| UBR4               | 0.607179365615497    | 2 | 0.738163685571282                  |
| 0.12076305222442   |                      |   |                                    |
| AL035413.1         | 4.69016002476105     | 2 | 0.0958395334744874                 |

|                              |   |                                     |
|------------------------------|---|-------------------------------------|
| 4.35239108308254             |   |                                     |
| EMC1 0.0128566595598862      | 2 | 0.993592287729564                   |
| 0.0518456490575677           |   |                                     |
| MRT04 0.556039113284662      | 2 | 0.757282011476077                   |
| 0.164978735621102            |   |                                     |
| AKR7A2 3.27372797356121 2    |   | 0.194589321121716                   |
| 0.282903932758881            |   |                                     |
| PQLC2 1.29334414922584 2     |   | 0.5237860021553 0.450385869940432   |
| CAPZB 0.997897498165244      | 2 | 0.607168610889703                   |
| 0.0691994757965824           |   |                                     |
| MINOS1 0.708850962243655     | 2 | 0.701576396329573                   |
| 0.0349391373993521           |   |                                     |
| TMC04 3.84904994664198 2     |   | 0.145945068193619                   |
| 1.65220905886174             |   |                                     |
| OTUD3 0.822829921717667      | 2 | 0.662711875046994                   |
| 0.535288918044518            |   |                                     |
| MUL1 3.30846680208273 2      |   | 0.191238602840636                   |
| 0.451287312953125            |   |                                     |
| PINK1 2.46497884548081 2     |   | 0.291565842841559                   |
| 0.241348827209378            |   |                                     |
| DDOST 2.01558116158937 2     |   | 0.365024581608521                   |
| 0.129235328630959            |   |                                     |
| HP1BP3 1.00316517727599 2    |   | 0.60557153033579 0.0701359747850312 |
| EIF4G3 0.724800606116256     | 2 | 0.696003699660187                   |
| 0.224353582451527            |   |                                     |
| ECE1 2.10032722181624 2      |   | 0.349880500161642                   |
| 0.301312764810094            |   |                                     |
| USP48 0.500441217303175      | 2 | 0.77862899183081                    |
| 0.123909109889761            |   |                                     |
| CDC42 2.52283958936141 2     |   | 0.283251581783824                   |
| 0.0847778742909905           |   |                                     |
| ZBTB40 4.63922052059177 2    |   | 0.0983118941872403                  |
| 2.898349482467               |   |                                     |
| KDM1A 0.263980541771245      | 2 | 0.876349521142624                   |
| 0.0407886767575355           |   |                                     |
| LUZP1 1.73194804315103 2     |   | 0.420641638995427                   |
| 0.795890092007143            |   |                                     |
| LINC01355 4.53981580320782 2 |   | 0.103321695407348                   |
| 3.20939663696398             |   |                                     |
| HNRNPR 2.01567778259576 2    |   | 0.365006947513265                   |
| 0.151425781563361            |   |                                     |
| ASAP3 1.19357454109807 2     |   | 0.550577654751397                   |
| 0.890258123890539            |   |                                     |
| ID3 0.0591633493453533       | 2 | 0.970851580417903                   |
| 0.034607814761721            |   |                                     |
| RPL11 20.2811394634566 2     |   | 3.9446322600778e-05                 |
| 0.164216153246403            |   |                                     |
| ELOA 0.302530149141333       | 2 | 0.859619805105372                   |
| 0.140944907892576            |   |                                     |
| ELOA-AS1 2.280349942213 2    |   | 0.319763067623504                   |

|                               |   |                                    |
|-------------------------------|---|------------------------------------|
| 0.583763320103433             |   |                                    |
| PITHD1 2.30465622714985 2     |   | 0.315900460455914                  |
| 0.186369887253219             |   |                                    |
| LYPLA2 2.7629944520379 2      |   | 0.251202164943658                  |
| 0.191027049195548             |   |                                    |
| GALE 0.85877068478418 2       |   | 0.650909057995045                  |
| 0.341919862575851             |   |                                    |
| HMGCL 0.70556550388331 2      |   | 0.70272984348921 0.167727894040224 |
| FUCA1 8.0206320650364 2       |   | 0.018127665399696                  |
| 0.596075634461003             |   |                                    |
| CNR2 9.37543151617928 2       |   | 0.00920769475500616                |
| 0.592100297743351             |   |                                    |
| PNRC2 2.6996674320859 2       |   | 0.2592833717265 0.12057136409193   |
| SRSF10 0.041877506895139      | 2 | 0.979278820820404                  |
| 0.0216215361362811            |   |                                    |
| IFNLR1 0.269680386183494      | 2 | 0.873855548683754                  |
| 0.227571873496492             |   |                                    |
| STPG1 1.85009420908492 2      |   | 0.396512741083838                  |
| 0.512127014839221             |   |                                    |
| NIPAL3 3.15863276561117 2     |   | 0.206115954464032                  |
| 0.547230298083088             |   |                                    |
| RCAN3 0.471434078483279       | 2 | 0.790004182491822                  |
| 0.177898604491529             |   |                                    |
| AL445686.2 1.63329579749109 2 |   | 0.441910503248165                  |
| 1.0597146980771               |   |                                    |
| SRRM1 0.255154229690278       | 2 | 0.880225534761135                  |
| 0.0426541973079602            |   |                                    |
| CLIC4 14.243264725586 2       |   | 0.000807447627308555               |
| 0.521309855091179             |   |                                    |
| RUNX3 1.72370120749387 2      |   | 0.422379701144704                  |
| 0.15736019471375              |   |                                    |
| SYF2 4.50084743844819 2       |   | 0.105354574344459                  |
| 0.107252830411888             |   |                                    |
| RSRP1 6.74826293101051 2      |   | 0.0342478508377582                 |
| 0.297982769034815             |   |                                    |
| TMEM50A 6.8742248345626 2     |   | 0.0321574085676782                 |
| 0.211038425280438             |   |                                    |
| MAC01 0.568287728513849       | 2 | 0.752658356281822                  |
| 0.202590496343431             |   |                                    |
| MTFR1L 2.98574409941303 2     |   | 0.224726302693287                  |
| 0.259630154424711             |   |                                    |
| STMN1 20.0963162941646 2      |   | 4.32653641554426e-05               |
| 0.482273036495648             |   |                                    |
| PAFAH2 7.07398991930065 2     |   | 0.0291006444311275                 |
| 1.07515323332999              |   |                                    |
| PDIK1L 4.75570604417287 2     |   | 0.0927494950154815                 |
| 1.18117036137013              |   |                                    |
| ZNF593 2.62437957070438 2     |   | 0.269229854820701                  |
| 0.255146698197713             |   |                                    |
| CEP85 0.458890011616792       | 2 | 0.794974686425943                  |

|                             |   |                      |
|-----------------------------|---|----------------------|
| 0.493081768112431           |   |                      |
| SH3BGRL3 15.1376363709908 2 |   | 0.000516302261700075 |
| 0.252148187332548           |   |                      |
| UBXN11 1.71911046009453 2   |   | 0.423350333958333    |
| 0.387867299477383           |   |                      |
| CD52 5.00765476983976 2     |   | 0.0817714281981643   |
| 0.0977765458318958          |   |                      |
| DHDDS 1.89231368340766 2    |   | 0.388230190146024    |
| 0.518648459935588           |   |                      |
| HMG2 88.1609054104135 2     | 0 | 0.734986130384536    |
| RPS6KA1 0.463314120449732   | 2 | 0.793218102705515    |
| 0.130010449733179           |   |                      |
| ARID1A 2.82798668770657 2   |   | 0.243170279137164    |
| 0.276799023462642           |   |                      |
| PIGV 4.47704016020954 2     |   | 0.106616171076165    |
| 1.00709500661063            |   |                      |
| ZDHHC18 1.01599805387045 2  |   | 0.601698357253302    |
| 0.860259356188335           |   |                      |
| GPN2 0.693864503130658      | 2 | 0.706853214834458    |
| 0.175336337791805           |   |                      |
| GPATCH3 0.267127529320133   | 2 | 0.874971674927372    |
| 0.164155356528586           |   |                      |
| NUDC 2.33951268984259 2     |   | 0.310442572960635    |
| 0.158495922061906           |   |                      |
| KDF1 1.63552380542983 2     |   | 0.441418487298184    |
| 0.666079097747838           |   |                      |
| WDTC1 1.27089928589917 2    |   | 0.529697260124339    |
| 0.284668682012249           |   |                      |
| TMEM222 3.11962879584643 2  |   | 0.210175076511609    |
| 0.557831725075857           |   |                      |
| SYTL1 9.6405978090403 2     |   | 0.00806437630028389  |
| 0.585205360435194           |   |                      |
| WASF2 6.79924142549123 2    |   | 0.0333859304170824   |
| 0.281474355062              |   |                      |
| AHDC1 11.4323261370577 2    |   | 0.00329231910125038  |
| 1.8563149387929             |   |                      |
| FGR 1.13566649782998 2      |   | 0.566752120034078    |
| 1.05443884119893            |   |                      |
| IFI6 1.05012601778037 2     |   | 0.591518092294071    |
| 0.934308295746934           |   |                      |
| FAM76A 3.2212301521599 2    |   | 0.199764705787897    |
| 0.61390581896562            |   |                      |
| STX12 1.21648909173808 2    |   | 0.544305534292518    |
| 0.245709468208647           |   |                      |
| PPP1R8 2.06717625772177 2   |   | 0.355728269017316    |
| 0.134306141386425           |   |                      |
| THEMIS2 26.6019941357742 2  |   | 1.67282445806549e-06 |
| 1.14407720183369            |   |                      |
| RPA2 0.137893983809824      | 2 | 0.933376155258889    |
| 0.052769983259952           |   |                      |



|            |                    |   |                     |
|------------|--------------------|---|---------------------|
| XKR8       | 0.924062924310034  | 2 | 0.630002518393205   |
|            | 0.460042075642778  |   |                     |
| EYA3       | 1.50493814896103   | 2 | 0.471201683206799   |
|            | 0.14849028981669   |   |                     |
| PTAFR      | 10.7848521158055   | 2 | 0.00455091913875461 |
|            | 0.651786489403448  |   |                     |
| DNAJC8     | 2.67798947460843   | 2 | 0.262109024611822   |
|            | 0.123185404283774  |   |                     |
| ATP5IF1    | 7.02164031860648   | 2 | 0.0298724042569126  |
|            | 0.157639437753085  |   |                     |
| AL353622.1 | 0.0161458762688508 | 2 | 0.991959560518629   |
|            | 0.0776757267021052 |   |                     |
| SESN2      | 1.84323775972931   | 2 | 0.39787440856531    |
|            | 0.722819373700761  |   |                     |
| MED18      | 3.74432520216037   | 2 | 0.153790713964061   |
|            | 0.502921235338563  |   |                     |
| PHACTR4    | 0.57972651703018   | 2 | 0.748365893245822   |
|            | 0.250887389926322  |   |                     |
| RCC1       | 0.487860471138573  | 2 | 0.783542295738329   |
|            | 0.129628882493552  |   |                     |
| TRNAU1AP   | 0.614487463180313  | 2 | 0.735471321465414   |
|            | 0.143072304053335  |   |                     |
| SNHG12     | 0.0176020349537318 | 2 | 0.99123759810893    |
|            | 0.037587051499505  |   |                     |
| TAF12      | 1.15208870130723   | 2 | 0.562117514364806   |
|            | 0.0845351409332562 |   |                     |
| GMEB1      | 2.69562944783935   | 2 | 0.259807391629733   |
|            | 0.543082586410517  |   |                     |
| YTHDF2     | 0.628447620586422  | 2 | 0.730355548776403   |
|            | 0.0906207480578285 |   |                     |
| EPB41      | 3.46864232667541   | 2 | 0.17651998786303    |
|            | 0.55341811016395   |   |                     |
| SRSF4      | 6.88577868812868   | 2 | 0.0319721731337733  |
|            | 0.312195596793511  |   |                     |
| MECR       | 0.0587860109620444 | 2 | 0.971034767481131   |
|            | 0.0966511232015433 |   |                     |
| LAPTM5     | 10.3781503172987   | 2 | 0.00557716242091988 |
|            | 0.100907124130972  |   |                     |
| PUM1       | 0.687780585017793  | 2 | 0.709006707129974   |
|            | 0.215254122380131  |   |                     |
| SNRNP40    | 0.24853152283705   | 2 | 0.883145103796554   |
|            | 0.0858714832879004 |   |                     |
| ZCCHC17    | 1.78980289253642   | 2 | 0.408647870428966   |
|            | 0.246875148497561  |   |                     |
| SERINC2    | 8.42292445736777   | 2 | 0.0148246754163227  |
|            | 1.5032476053747    |   |                     |
| PEF1       | 1.11779118777331   | 2 | 0.571840259114727   |
|            | 0.173704165143475  |   |                     |
| PTP4A2     | 12.1241351853395   | 2 | 0.00232957928363986 |
|            | 0.261462296283679  |   |                     |
| KHDRBS1    | 3.90586867136732   | 2 | 0.141857203615793   |
|            | 0.165345982371395  |   |                     |

|          |                      |   |                      |
|----------|----------------------|---|----------------------|
| TMEM39B  | 0.44114892101803     | 2 | 0.802057914997513    |
|          | 0.155236179408745    |   |                      |
| KPNA6    | 0.833397410292817    | 2 | 0.659219509471208    |
|          | 0.242357693395525    |   |                      |
| TXLNA    | 1.05143026964067     | 2 | 0.591132473757522    |
|          | 0.424195918233836    |   |                      |
| CCDC28B  | 36.4252892141801     | 2 | 1.23125766249288e-08 |
|          | 1.00898896520511     |   |                      |
| IQCC     | 3.04355321154765     | 2 | 0.21832366710997     |
| TMEM234  | 0.525856198289275    | 2 | 4.54125650832876     |
|          | 0.266589346857986    |   | 0.768797172498273    |
| EIF3I    | 3.18521406136601     | 2 | 0.203394663806861    |
|          | 0.126862467303268    |   |                      |
| FAM167B  | 0.609117940343931    | 2 | 0.737448539485158    |
|          | 0.46050988251958     |   |                      |
| LCK      | 44.6436207937987     | 2 | 2.02190597597962e-10 |
|          | 0.777932534039811    |   |                      |
| HDAC1    | 16.3728631230973     | 2 | 0.000278405586974784 |
|          | 0.284872599876175    |   |                      |
| MARCKSL1 | 315.297315994821     | 2 | 0                    |
| FAM229A  | 0.951382575805822    | 2 | 1.03663978382898     |
|          | 0.810910254700599    |   | 0.621455303407144    |
| BSDC1    | 1.28737439599661     | 2 | 0.525351772454587    |
|          | 0.254855652183052    |   |                      |
| ZBTB8A   | 0.342603679445043    | 2 | 0.84256721483145     |
|          | 0.329696320278107    |   |                      |
| ZBTB80S  | 38.505137628417      | 2 | 4.35226776840381e-09 |
|          | 0.671498029399645    |   |                      |
| RBBP4    | 2.14514745203197     | 2 | 0.342126842555179    |
|          | 0.102263694913737    |   |                      |
| SYNC     | 8.76211281022898     | 2 | 0.0125121337548043   |
|          | 0.737819396043209    |   |                      |
| YARS     | 5.35727727232555     | 2 | 0.0686565571161916   |
|          | 0.412606865576774    |   |                      |
| S100PBP  | 0.0162998615259353   | 2 | 0.991883189884682    |
|          | 0.0419423360273436   |   |                      |
| RNF19B   | 5.69188929355015     | 2 | 0.0580793763223341   |
|          | 0.967248201334294    |   |                      |
| AK2      | 8.86108744094848     | 2 | 0.0119080132816473   |
|          | 0.181035884198382    |   |                      |
| TRIM62   | 6.74841339499688e-05 | 2 | 0.999966258502282    |
|          | 0.00613830799262475  |   |                      |
| ZNF362   | 2.71597476223        | 2 | 0.257177857448734    |
|          | 2.46798070062172     |   |                      |
| PHC2     | 0.149596588655091    | 2 | 0.927930636326302    |
|          | 0.286967667052925    |   |                      |
| SMIM12   | 0.202477655714963    | 2 | 0.903717174273864    |
|          | 0.0781590740615165   |   |                      |
| ZMYM6    | 5.52515944448187     | 2 | 0.0631287035984636   |
|          | 0.611767157880285    |   |                      |

|            |                    |   |                      |
|------------|--------------------|---|----------------------|
| ZMYM1      | 1.1562637777001    | 2 | 0.560945296533128    |
|            | 1.16042621606696   |   |                      |
| SFPQ       | 1.19856555683979   | 2 | 0.549205396832815    |
|            | 0.106907430848385  |   |                      |
| ZMYM4      | 1.04694176522923   | 2 | 0.592460613898898    |
|            | 0.315715279774624  |   |                      |
| KIAA0319L  | 2.82218351300954   | 2 | 0.24387688358415     |
|            | 0.567495138638186  |   |                      |
| NCDN       | 0.0480931493963818 | 2 | 0.976240240604494    |
|            | 0.143619570594368  |   |                      |
| AC004865.2 | 0.974512397239743  | 2 | 0.614309627503223    |
|            | 0.391976863220137  |   |                      |
| PSMB2      | 6.72537361027068   | 2 | 0.034642057335977    |
|            | 0.170069656483566  |   |                      |
| C1orf216   | 2.79748613597605   | 2 | 0.246907114437851    |
|            | 0.71396987576888   |   |                      |
| CLSPN      | 1.78178035934647   | 2 | 0.410290358006165    |
|            | 0.534832049580216  |   |                      |
| AG04       | 0.639106623263694  | 2 | 0.726473471857325    |
|            | 0.426333803147474  |   |                      |
| AG01       | 1.2170692496966    | 2 | 0.544147665597028    |
|            | 0.431616446881666  |   |                      |
| AG03       | 7.99706168330475   | 2 | 0.0183425672386611   |
|            | 0.797218621565768  |   |                      |
| ADPRHL2    | 3.47423885144056   | 2 | 0.176026729076836    |
|            | 0.33356449299362   |   |                      |
| TRAPPC3    | 3.88934773503127   | 2 | 0.143033863721532    |
|            | 0.235583082559502  |   |                      |
| MAP7D1     | 2.06779834862112   | 2 | 0.355617638564359    |
|            | 0.264015214033484  |   |                      |
| THRAP3     | 25.9425688613889   | 2 | 2.32617695294923e-06 |
|            | 0.417562088520523  |   |                      |
| SH3D21     | 3.34451548064411   | 2 | 0.187822532071756    |
|            | 1.32774349104816   |   |                      |
| STK40      | 23.9553092261952   | 2 | 6.28305259797735e-06 |
|            | 0.812901017345632  |   |                      |
| LSM10      | 86.9574097632724   | 2 | 0.671412907541106    |
| MRPS15     | 2.24489095912082   | 2 | 0.325482858896494    |
|            | 0.107767681519822  |   |                      |
| LINC01137  | 2.68351894470864   | 2 | 0.261385363431201    |
|            | 1.3211138495845    |   |                      |
| ZC3H12A    | 0.776587062222054  | 2 | 0.67821323735857     |
|            | 0.302316433527309  |   |                      |
| MEAF6      | 0.851273069328499  | 2 | 0.653353770417113    |
|            | 0.0488017294951629 |   |                      |
| SNIP1      | 0.491865590244852  | 2 | 0.781974775678689    |
|            | 0.350462669568468  |   |                      |
| GNL2       | 0.0140042586296025 | 2 | 0.993022328473842    |
|            | 0.0251166493126159 |   |                      |
| C1orf109   | 3.5232395344621    | 2 | 0.171766416760951    |

|                     |                      |   |                      |
|---------------------|----------------------|---|----------------------|
| 0.387626591014416   |                      |   |                      |
| CDCA8               | 1.57612372261269     | 2 | 0.454725262399086    |
| 1.89274321569539    |                      |   |                      |
| YRDC                | 7.98024708543853     | 2 | 0.0184974287560042   |
| 0.64976539601639    |                      |   |                      |
| C1orf122            | 0.000241603784257024 | 2 | 0.999879205404126    |
| 0.00304299292401753 |                      |   |                      |
| MTF1                | 0.0602812268794162   | 2 | 0.970309085457429    |
| 0.0967565487523048  |                      |   |                      |
| INPP5B              | 7.42340116230728     | 2 | 0.0244359326310423   |
| 0.617606321125996   |                      |   |                      |
| SF3A3               | 0.113469776198206    | 2 | 0.944844525693839    |
| 0.0535059215051529  |                      |   |                      |
| FHL3                | 0.0779014548271432   | 2 | 0.961798098258788    |
| 0.292930752072705   |                      |   |                      |
| UTP11               | 6.47098206693513     | 2 | 0.0393408825065593   |
| 0.221899492130389   |                      |   |                      |
| POU3F1              | 2.68448391488943     | 2 | 0.261259279309799    |
| 1.50610168921501    |                      |   |                      |
| RRAGC               | 1.9666828333557      | 2 | 0.374059120941117    |
| 0.249578713271889   |                      |   |                      |
| AL139260.1          | 3.14393635738955     | 2 | 0.207636114952482    |
| 0.915357262742237   |                      |   |                      |
| MYCBP               | 1.14115272269966     | 2 | 0.565199585607909    |
| 0.325667114906087   |                      |   |                      |
| AKIRIN1             | 4.6583383380615      | 2 | 0.0973766169993521   |
| 0.241620507608463   |                      |   |                      |
| NDUFS5              | 10.1945805351491     | 2 | 0.00611328952074253  |
| 0.170631090391094   |                      |   |                      |
| MACF1               | 3.50284355715539     | 2 | 0.17352705093512     |
| PABPC4              | 0.443519011987363    | 2 | 0.926049228499671    |
| 0.121843387268642   |                      |   | 0.801108002842625    |
| PPIE                | 0.0494727127117519   | 2 | 0.975567080186576    |
| 0.0203855398642498  |                      |   |                      |
| TRIT1               | 0.435246911825408    | 2 | 0.804428287360863    |
| 0.267529175163317   |                      |   |                      |
| MFSD2A              | 0.242737311246747    | 2 | 0.885707378392868    |
| 0.16786444229957    |                      |   |                      |
| CAP1                | 45.1892036780398     | 2 | 1.53917878442655e-10 |
| 0.469492311053148   |                      |   |                      |
| PPT1                | 0.663652485090836    | 2 | 0.717612002457049    |
| 0.181879615366743   |                      |   |                      |
| RLF                 | 3.9482707081719      | 2 | 0.138881343529417    |
| 0.88893396535408    |                      |   |                      |
| AL050341.2          | 5.30480334810842e-05 | 2 | 0.999973476335018    |
| 0.00345491134856794 |                      |   |                      |
| ZMPSTE24            | 2.13230001723626     | 2 | 0.34433164263068     |
| SMAP2               | 1.94798835015539     | 2 | 0.348588319468956    |
| 0.143755063625468   |                      |   | 0.377571933896552    |
| AL603839.3          | 2.58106932770492     | 2 | 0.275123645090585    |

|                             |   |                                    |
|-----------------------------|---|------------------------------------|
| 2.84296146414718            |   |                                    |
| EX05 0.448530811840379      | 2 | 0.799103019550116                  |
| 0.335548333309452           |   |                                    |
| ZNF684 0.250550148003476    | 2 | 0.882254184014395                  |
| 0.496558161284418           |   |                                    |
| NFYC-AS1 3.46998197143585 2 |   | 0.176401790414671                  |
| 1.46075198582749            |   |                                    |
| NFYC 0.102586701926505      | 2 | 0.949999946253085                  |
| 0.0542975213336806          |   |                                    |
| CTPS1 0.411560441814252     | 2 | 0.814011959434846                  |
| 0.263359012891411           |   |                                    |
| SCMH1 0.468203477933036     | 2 | 0.791281307657775                  |
| 0.369554756358564           |   |                                    |
| HIVEP3 10.9126738655718 2   |   | 0.00426916537751998                |
| 2.64530138961356            |   |                                    |
| FOXJ3 1.95583296449567 2    |   | 0.376093881375909                  |
| 0.541373522425386           |   |                                    |
| PPCS 2.24538495847105 2     |   | 0.32540247466394 0.266376001517774 |
| CCDC30 0.187785104870012    | 2 | 0.910380575161812                  |
| 0.400741391764728           |   |                                    |
| PPIH 1.94592730307518 2     |   | 0.37796123121809 0.265139159481149 |
| YBX1 1.13584021355383 2     |   | 0.566702895294498                  |
| 0.0464375738453198          |   |                                    |
| P3H1 1.37224005813685 2     |   | 0.503525949928386                  |
| 0.404154716112326           |   |                                    |
| C1orf50 0.610378122630573   | 2 | 0.736984026050042                  |
| 0.350036516332875           |   |                                    |
| SVBP 1.36964300374642 2     |   | 0.504180216767573                  |
| 0.168687679516263           |   |                                    |
| ERMAP 1.56549609781393 2    |   | 0.457148018471499                  |
| 0.606669216727164           |   |                                    |
| ZNF691 1.8968522794899 2    |   | 0.387350179017436                  |
| 0.479738458078737           |   |                                    |
| SLC2A1 14.5620349989647 2   |   | 0.000688484674376211               |
| 1.08308288749463            |   |                                    |
| EBNA1BP2 7.40781457407275 2 |   | 0.0246271130360105                 |
| 0.345792130411843           |   |                                    |
| CDC20 2.00395222037355 2    |   | 0.367153188674052                  |
| 1.06228417090862            |   |                                    |
| ELOVL1 0.125402894897589    | 2 | 0.939223839508524                  |
| 0.0690786115136189          |   |                                    |
| MED8 0.112605534826353      | 2 | 0.945252900785683                  |
| 0.0633744696270744          |   |                                    |
| SZT2 1.11614664662174 2     |   | 0.572310659905707                  |
| 0.535968504291379           |   |                                    |
| HYI 15.6060842761235 2      |   | 0.00040849040265134                |
| 2.70384494612159            |   |                                    |
| KDM4A 4.06592919215047 2    |   | 0.130946740950825                  |
| 1.11073470181722            |   |                                    |
| ST3GAL3 1.43671460689714 2  |   | 0.487552499310784                  |

|                             |   |                                   |
|-----------------------------|---|-----------------------------------|
| 0.789580609599908           |   |                                   |
| IP013 0.597550003524455     | 2 | 0.741726277767173                 |
| 0.394484315899979           |   |                                   |
| DPH2 0.814653900343551      | 2 | 0.665426593392773                 |
| 0.262122923000374           |   |                                   |
| ATP6V0B 7.25890325440869 2  |   | 0.0265307291506746                |
| 0.163942158452998           |   |                                   |
| CCDC24 2.01636361739331 2   |   | 0.364881801738846                 |
| 0.989688412829854           |   |                                   |
| DMAP1 0.012747985185241     | 2 | 0.993646278206657                 |
| 0.0192963168498661          |   |                                   |
| ERI3 3.51285604950385 2     |   | 0.172660502686998                 |
| 0.306184706868551           |   |                                   |
| RNF220 3.95321573367111 2   |   | 0.138538381800202                 |
| 0.78214017434662            |   |                                   |
| TMEM53 10.3396532442985 2   |   | 0.00568555448298746               |
| 1.59263075582803            |   |                                   |
| ARMH1 0.482341289024312     | 2 | 0.785707538268405                 |
| 0.464879703544023           |   |                                   |
| RPS8 109.003532451581 2     | 0 | 0.286174458353229                 |
| PLK3 0.00261280467913022    | 2 | 0.998694450632489                 |
| 0.0210366625271913          |   |                                   |
| PTCH2 3.67887199638527 2    |   | 0.158907024686792                 |
| 0.680249289254295           |   |                                   |
| EIF2B3 0.000453843877959515 | 2 | 0.999773103805856                 |
| 0.00576824651096365         |   |                                   |
| HECTD3 0.268228031684509    | 2 | 0.874490353164941                 |
| 0.283616017301693           |   |                                   |
| UROD 0.00255250068787938    | 2 | 0.998724563717178                 |
| 0.00751442758930234         |   |                                   |
| MUTYH 0.00365294467254181   | 2 | 0.998175194649271                 |
| 0.0220668884001519          |   |                                   |
| TOE1 0.656007305022047      | 2 | 0.720360388576236                 |
| 0.123512393471986           |   |                                   |
| TESK2 3.09765988931884 2    |   | 0.212496461045597                 |
| 1.16338822736104            |   |                                   |
| CCDC163 3.03122216927516 2  |   | 0.219673904475302                 |
| 2.64626620775925            |   |                                   |
| PRDX1 258.740871253534 2    | 0 | 0.540461448346851                 |
| AKR1A1 41.6129947993607 2   |   | 9.20138076843102e-10              |
| 1.05458365388707            |   |                                   |
| NASP 0.0338466002097994     | 2 | 0.983219094544319                 |
| 0.0219737956235179          |   |                                   |
| GPBP1L1 1.99427167355968 2  |   | 0.368934618314741                 |
| 0.292622495048296           |   |                                   |
| TMEM69 0.599906586893548    | 2 | 0.740852822555434                 |
| 0.168198035161068           |   |                                   |
| IPP 1.10733546527727 2      |   | 0.574837588630274                 |
| 0.566963884051              |   |                                   |
| MAST2 2.34448966355446 2    |   | 0.30967100111966 0.63537088663982 |

|            |                     |   |                      |                   |
|------------|---------------------|---|----------------------|-------------------|
| POMGNT1    | 4.21355036736277    | 2 | 0.12162956768766     | 0.837804654738284 |
| LRRC41     | 5.57623398237601    | 2 | 0.0615369795617059   |                   |
|            | 0.436055040562399   |   |                      |                   |
| UQCRH      | 28.5408172161731    | 2 | 6.34512653086006e-07 |                   |
|            | 0.346856241168228   |   |                      |                   |
| NSUN4      | 2.45422318451431    | 2 | 0.293138058283956    |                   |
|            | 0.533425322989667   |   |                      |                   |
| FAAH       | 2.70607608275745    | 2 | 0.258453873150735    |                   |
|            | 3.11913809664945    |   |                      |                   |
| MKNK1      | 3.45151863911083    | 2 | 0.178037812841719    |                   |
|            | 0.577470704165315   |   |                      |                   |
| MOB3C      | 2.18353800355772    | 2 | 0.335622251893663    |                   |
|            | 1.35220673163258    |   |                      |                   |
| ATPAF1     | 0.740395616467085   | 2 | 0.690597711212233    |                   |
|            | 0.210551247991463   |   |                      |                   |
| EFCAB14    | 0.905284314325332   | 2 | 0.63594566151428     |                   |
|            | 0.129023941419344   |   |                      |                   |
| CMPK1      | 6.47785366779757    | 2 | 0.0392059470239132   |                   |
|            | 0.298563134284076   |   |                      |                   |
| BEND5      | 2.690981143299      | 2 | 0.260411925811418    |                   |
|            | 0.596721749944971   |   |                      |                   |
| FAF1       | 3.23012734168022    | 2 | 0.198878007307883    |                   |
|            | 0.337310802348211   |   |                      |                   |
| CDKN2C     | 6.87273987854807    | 2 | 0.0321812936022696   |                   |
|            | 0.263625522256231   |   |                      |                   |
| RNF11      | 9.68333237828227    | 2 | 0.00789389037362842  |                   |
|            | 0.71201809735987    |   |                      |                   |
| EPS15      | 1.26307686002764    | 2 | 0.53177307573236     | 0.156914623650859 |
| AC104170.1 | 7.28590914010206    | 2 | 0.0261748940483821   |                   |
|            | 0.634174922822184   |   |                      |                   |
| OSBPL9     | 6.61155235105139    | 2 | 0.0366707378581788   |                   |
|            | 0.390767526158515   |   |                      |                   |
| NRDC       | 0.925297137600758   | 2 | 0.62961385958681     |                   |
|            | 0.178268386041575   |   |                      |                   |
| TXNDC12    | 1.2053979067501     | 2 | 0.547332416147286    |                   |
|            | 0.209177273753752   |   |                      |                   |
| KTI12      | 0.00421467435656488 | 2 | 0.997894881697795    |                   |
|            | 0.0164497838161151  |   |                      |                   |
| BTF3L4     | 0.30930131265372    | 2 | 0.856714412972418    |                   |
|            | 0.077593930206428   |   |                      |                   |
| CC2D1B     | 0.227851014708356   | 2 | 0.892324425013998    |                   |
|            | 0.289137416566286   |   |                      |                   |
| ORC1       | 0.0473129639075288  | 2 | 0.976621139127215    |                   |
|            | 0.170436790239934   |   |                      |                   |
| PRPF38A    | 4.26847945341723    | 2 | 0.118334522762814    |                   |
|            | 0.218209233319476   |   |                      |                   |
| TUT4       | 9.35067272732937    | 2 | 0.00932238889740611  |                   |
|            | 0.449543790515365   |   |                      |                   |
| GPX7       | 11.0274999736511    | 2 | 0.00403096294730509  |                   |
|            | 0.929993255331849   |   |                      |                   |

|                               |                                    |
|-------------------------------|------------------------------------|
| SHISAL2A 3.34315422912209 2   | 0.187950412439982                  |
| 0.278932778562717             |                                    |
| COA7 0.456526645508542        | 2 0.795914649801369                |
| 0.277747597483579             |                                    |
| ZYG11B 1.81671545429819 2     | 0.403185821751885                  |
| 0.821929907996196             |                                    |
| ECHDC2 13.9756787326824 2     | 0.000923038727234426               |
| 1.92489755432787              |                                    |
| SCP2 2.54451566331672 2       | 0.28019826652589 0.087568344231656 |
| CPT2 2.67701781995202 2       | 0.262236395276517                  |
| 0.266728705794736             |                                    |
| C1orf123 0.174467812924938    | 2 0.916462704011257                |
| 0.081314800199014             |                                    |
| MAGOH 0.405789388658194       | 2 0.816364204679596                |
| 0.0595976578580843            |                                    |
| AL606760.1 4.99663335241219 2 | 0.0822232906176517                 |
| 2.0496118738576               |                                    |
| LRP8 2.139982077515 2         | 0.343011591214984                  |
| 1.24960061485504              |                                    |
| AC119428.2 0.803016261810412  | 2 0.669309877582431                |
| 0.292260800303044             |                                    |
| NDC1 1.36663850378923 2       | 0.504938190678017                  |
| 0.28821032696812              |                                    |
| YIPF1 2.7823465930106 2       | 0.248783236821764                  |
| 0.412027302887779             |                                    |
| HSPB11 0.0744889787893968     | 2 0.963440555553591                |
| 0.0313093462044551            |                                    |
| LRRC42 0.00975802286581996    | 2 0.995132871609683                |
| 0.0232820435478604            |                                    |
| TMEM59 20.9381687353665 2     | 2.84010521006683e-05               |
| 0.221190751020889             |                                    |
| TCEANC2 4.54251187402348 2    | 0.103182507939438                  |
| 0.940159579326328             |                                    |
| CYB5RL 1.93555165346443 2     | 0.379927122810369                  |
| 1.50878919787627              |                                    |
| MRPL37 0.000984995835517486   | 2 0.999507623339434                |
| 0.004551092070147             |                                    |
| SSBP3 6.70337390236514 2      | 0.0350252184017477                 |
| 0.835450731547358             |                                    |
| TTC4 1.01220237157372 2       | 0.602841369439305                  |
| 0.927139905082559             |                                    |
| PARS2 0.0799595136036152      | 2 0.960808888800222                |
| 0.192494141883075             |                                    |
| DHCR24 2.51680391207424 2     | 0.28410768048733 0.903264365467699 |
| USP24 2.56009221082772 2      | 0.278024481723897                  |
| 0.562641465555163             |                                    |
| OMA1 3.08087615338333 2       | 0.214287206631371                  |
| 0.537974918788326             |                                    |
| MYSM1 0.0256304263875595      | 2 0.987266551998675                |
| 0.0600245985810852            |                                    |



|            |                    |   |                     |
|------------|--------------------|---|---------------------|
| JUN        | 7.87609140371344   | 2 | 0.0194862595186587  |
|            | 0.528270490991269  |   |                     |
| FGGY       | 0.0187123791239419 | 2 | 0.990687443394153   |
|            | 0.080214947188977  |   |                     |
| NFIA       | 1.59710853727322   | 2 | 0.449979042899538   |
|            | 0.867168812197312  |   |                     |
| TM2D1      | 2.82713888112682   | 2 | 0.243273381669696   |
|            | 0.216114195844479  |   |                     |
| PATJ       | 1.60349784137984   | 2 | 0.448543810181409   |
|            | 1.21470041764525   |   |                     |
| L1TD1      | 5.80749072835399   | 2 | 0.0548175235038099  |
|            | 1.51081083523297   |   |                     |
| USP1       | 0.0376816444163991 | 2 | 0.981335556638058   |
|            | 0.0326285005488883 |   |                     |
| DOCK7      | 3.51086580376506   | 2 | 0.172832406620445   |
|            | 1.20918126325382   |   |                     |
| ATG4C      | 0.0904762220122988 | 2 | 0.955769875409697   |
|            | 0.0897955272166844 |   |                     |
| FOX3D3-AS1 | 3.48870553281676   | 2 | 0.174758061658553   |
|            | 5.86864199355438   |   |                     |
| ALG6       | 1.84001291819763   | 2 | 0.398516467018961   |
|            | 0.331799610862633  |   |                     |
| ITGB3BP    | 11.4070657102528   | 2 | 0.00333416550229115 |
|            | 0.750263303090002  |   |                     |
| EFCAB7     | 0.196798586751245  | 2 | 0.906286957118893   |
|            | 0.242992834699326  |   |                     |
| PGM1       | 0.61339969899638   | 2 | 0.735871439945089   |
|            | 0.193533440265051  |   |                     |
| JAK1       | 2.91311313665791   | 2 | 0.233037342893535   |
|            | 0.0925846080517836 |   |                     |
| LEPROT     | 0.269602556633613  | 2 | 0.873889555237436   |
|            | 0.140535184474913  |   |                     |
| PDE4B      | 2.60045574073623   | 2 | 0.272469698189067   |
|            | 0.599861940067154  |   |                     |
| WDR78      | 1.86872859212048   | 2 | 0.392835513255544   |
|            | 1.78877945551708   |   |                     |
| MIER1      | 1.7115232940474    | 2 | 0.424959398728951   |
|            | 0.285694795756845  |   |                     |
| SLC35D1    | 5.8056450779779    | 2 | 0.054868133843902   |
|            | 0.99155649690869   |   |                     |
| SERBP1     | 3.72139063324044   | 2 | 0.155564426223219   |
|            | 0.120355937916277  |   |                     |
| GADD45A    | 7.97944614462953   | 2 | 0.0185048379122552  |
|            | 0.696393228925736  |   |                     |
| DEPDC1     | 0.0132386309246707 | 2 | 0.993402543948222   |
|            | 0.11591939671372   |   |                     |
| LRR7C      | 0.326289265090541  | 2 | 0.84946831876426    |
|            | 0.253969333498193  |   |                     |
| LRR40      | 2.8080177410872    | 2 | 0.245610367526676   |
|            | 0.429247306217838  |   |                     |

|            |                    |   |                     |
|------------|--------------------|---|---------------------|
| SRSF11     | 0.333836680737896  | 2 | 0.846268714506678   |
|            | 0.0562544201293218 |   |                     |
| ANKRD13C   | 0.410488287943572  | 2 | 0.814448449457053   |
|            | 0.260494239311295  |   |                     |
| HHLA3      | 0.128126845272508  | 2 | 0.93794551066733    |
|            | 0.0939643756192009 |   |                     |
| ZRANB2     | 6.48397584922156   | 2 | 0.0390861175616198  |
|            | 0.323460853124823  |   |                     |
| LRRIQ3     | 0.0144636217167755 | 2 | 0.992794275763374   |
|            | 0.0997762832991691 |   |                     |
| FPGT       | 0.870229456997273  | 2 | 0.64719041163425    |
|            | 0.582629858095505  |   |                     |
| CRYZ       | 8.52038110509891   | 2 | 0.0141196116258115  |
|            | 0.644233713895409  |   |                     |
| TYW3       | 0.271778628396196  | 2 | 0.872939249122377   |
|            | 0.0700093397748733 |   |                     |
| ACADM      | 0.240720263285785  | 2 | 0.886601086110748   |
|            | 0.010839576768293  |   |                     |
| RABGGTB    | 0.0464655271109388 | 2 | 0.977035039154363   |
|            | 0.0380680571718209 |   |                     |
| PIGK       | 0.997942170602297  | 2 | 0.607155049190387   |
|            | 0.437324783074442  |   |                     |
| AC118549.1 | 0.061905373535636  | 2 | 0.969521443184033   |
|            | 0.0836100658549486 |   |                     |
| USP33      | 0.190978229172602  | 2 | 0.908928255659906   |
|            | 0.0480633605241247 |   |                     |
| MIGA1      | 0.247266587764833  | 2 | 0.883703841077348   |
|            | 0.280825185623396  |   |                     |
| FUBP1      | 0.316059309660305  | 2 | 0.853824461573659   |
|            | 0.0418402179449728 |   |                     |
| DNAJB4     | 0.763583235053092  | 2 | 0.682637288031805   |
|            | 0.398243167903723  |   |                     |
| AC103591.3 | 5.50103675729463   | 2 | 0.0638947309562387  |
|            | 0.631921512796861  |   |                     |
| PRKACB     | 4.18275690778655   | 2 | 0.123516756260699   |
|            | 0.443918383426558  |   |                     |
| RPF1       | 4.36351693293949   | 2 | 0.112842925570486   |
|            | 0.206616760603956  |   |                     |
| GNG5       | 12.2958759407548   | 2 | 0.00213788561151218 |
|            | 0.26394880105374   |   |                     |
| CTBS       | 6.34675516297762   | 2 | 0.0418619666489001  |
|            | 0.712160603001645  |   |                     |
| SSX2IP     | 0.0187438253133539 | 2 | 0.990671866844113   |
|            | 0.0924118864059655 |   |                     |
| MCOLN2     | 1.63830366522498   | 2 | 0.440805372737182   |
|            | 0.275703889523871  |   |                     |
| C1orf52    | 0.032791939201072  | 2 | 0.983737712694912   |
|            | 0.0412298766065499 |   |                     |
| BCL10      | 3.47992853272455   | 2 | 0.175526672711468   |
|            | 0.170695687528703  |   |                     |

|            |                    |   |                      |
|------------|--------------------|---|----------------------|
| ZNHIT6     | 1.81173522289965   | 2 | 0.404191052146923    |
|            | 0.386878048994685  |   |                      |
| ODF2L      | 0.362110118550111  | 2 | 0.834389416554641    |
|            | 0.148575640533846  |   |                      |
| SH3GLB1    | 2.32346049578284   | 2 | 0.312944241059466    |
|            | 0.204179515905102  |   |                      |
| SELENOF    | 2.40458645581438   | 2 | 0.300504296309167    |
|            | 0.069584195763541  |   |                      |
| HS2ST1     | 18.6006431640394   | 2 | 9.13948358159944e-05 |
|            | 0.907214511923433  |   |                      |
| LM04       | 63.6335084655659   | 2 | 1.52100554373646e-14 |
|            | 1.06736218874305   |   |                      |
| PKN2       | 2.49393673298011   | 2 | 0.287374692339001    |
|            | 0.426822449759953  |   |                      |
| GTF2B      | 0.106378061329441  | 2 | 0.948200756521101    |
|            | 0.049341495175922  |   |                      |
| KYAT3      | 0.820995502015487  | 2 | 0.663319999753574    |
|            | 0.22061004513611   |   |                      |
| RBMXL1     | 0.98794169439413   | 2 | 0.610198571830098    |
|            | 0.359278675658851  |   |                      |
| GBP3       | 1.82244056232204   | 2 | 0.402033330880942    |
|            | 0.870840997182409  |   |                      |
| GBP1       | 3.72024152135775   | 2 | 0.155653832370524    |
|            | 0.998152127851887  |   |                      |
| GBP2       | 0.774923360069036  | 2 | 0.678777644488962    |
|            | 0.566551040347286  |   |                      |
| GBP4       | 2.56121367285234   | 2 | 0.277868628474772    |
|            | 0.744897558514079  |   |                      |
| LRRC8B     | 0.938852777878131  | 2 | 0.625360879338698    |
|            | 0.519432801172289  |   |                      |
| AC099568.2 | 1.58420364553744   | 2 | 0.452891895721961    |
|            | 0.792886762587158  |   |                      |
| LRRC8D     | 3.53815492186068   | 2 | 0.170490200168106    |
|            | 0.692750640985624  |   |                      |
| ZNF326     | 3.97056099332664   | 2 | 0.137342084717026    |
|            | 0.266065314551759  |   |                      |
| ZNF644     | 1.5809519043591    | 2 | 0.453628838259548    |
|            | 0.201597697677849  |   |                      |
| CDC7       | 2.40444389218891   | 2 | 0.300525717563608    |
|            | 1.24274011423503   |   |                      |
| GLMN       | 0.0118804518654656 | 2 | 0.994077382326402    |
|            | 0.0313161723639015 |   |                      |
| RPAP2      | 0.838265013115042  | 2 | 0.657617050922761    |
|            | 0.238801587879862  |   |                      |
| GFI1       | 0.124275770763084  | 2 | 0.939753299614933    |
|            | 0.25041454986949   |   |                      |
| EVI5       | 11.5959565503346   | 2 | 0.00303368181952901  |
|            | 0.697948892360458  |   |                      |
| RPL5       | 13.7077930731164   | 2 | 0.00105533551748849  |
|            | 0.163062821187784  |   |                      |

|         |                    |   |                      |
|---------|--------------------|---|----------------------|
| FAM69A  | 0.190840802716732  | 2 | 0.908990713200119    |
|         | 0.203357336278034  |   |                      |
| MTF2    | 12.7690497872141   | 2 | 0.00168747003298386  |
|         | 0.395858103717655  |   |                      |
| TMED5   | 0.939248285369501  | 2 | 0.625237224109449    |
|         | 0.241531862275547  |   |                      |
| CCDC18  | 0.470014536402354  | 2 | 0.790565103621637    |
|         | 0.183036675912723  |   |                      |
| DR1     | 1.55466139266045   | 2 | 0.459631270720658    |
|         | 0.225353230048527  |   |                      |
| BCAR3   | 40.4646717284427   | 2 | 1.63383495621616e-09 |
|         | 2.0358232500287    |   |                      |
| DNTTIP2 | 0.17133074093713   | 2 | 0.917901336728212    |
|         | 0.0680925545589435 |   |                      |
| GCLM    | 0.0461526973989851 | 2 | 0.977187873901798    |
|         | 0.0782247276746934 |   |                      |
| ABCD3   | 7.10231743089377   | 2 | 0.0286913752462793   |
|         | 1.34350250530604   |   |                      |
| ALG14   | 0.746662816985439  | 2 | 0.688437041151572    |
|         | 0.266369605991598  |   |                      |
| RWDD3   | 4.82439009715058   | 2 | 0.0896183618553699   |
|         | 1.98371589567931   |   |                      |
| PTBP2   | 0.0184502840827911 | 2 | 0.990817279034409    |
|         | 0.0604879273072507 |   |                      |
| DPYD    | 5.87910913870061   | 2 | 0.0528892819995318   |
|         | 2.59628695413049   |   |                      |
| SNX7    | 4.49869825239012   | 2 | 0.105467848486527    |
|         | 1.06837201302966   |   |                      |
| AGL     | 1.33723309742099   | 2 | 0.512416991593341    |
|         | 0.315503942997179  |   |                      |
| SLC35A3 | 2.5758692322007    | 2 | 0.275839910464133    |
|         | 0.401369401523485  |   |                      |
| MFSD14A | 0.0105191213377574 | 2 | 0.994754246603002    |
|         | 0.0442505778503135 |   |                      |
| SASS6   | 0.176965904509469  | 2 | 0.915318714723276    |
|         | 0.177563948917031  |   |                      |
| TRMT13  | 8.22722137147924   | 2 | 0.0163486380346822   |
|         | 0.566108238352687  |   |                      |
| DBT     | 0.527108273235347  | 2 | 0.768316027282306    |
|         | 0.260836274386465  |   |                      |
| RTCA    | 2.36238019591373   | 2 | 0.306913264320368    |
|         | 0.217164797181803  |   |                      |
| CDC14A  | 0.301043092722432  | 2 | 0.860259194352385    |
|         | 0.505138251770295  |   |                      |
| EXTL2   | 4.48625977419415   | 2 | 0.106125822180468    |
|         | 1.4032596984294    |   |                      |
| SLC30A7 | 3.96782905102338   | 2 | 0.137529818232747    |
|         | 0.908256810128276  |   |                      |
| DPH5    | 12.1730862349635   | 2 | 0.0022732537187593   |
|         | 1.39013914798861   |   |                      |

|                     |                     |   |                    |
|---------------------|---------------------|---|--------------------|
| AC093157.1          | 0.233688791490075   | 2 | 0.8897236271748    |
| 0.446184505014211   |                     |   |                    |
| RNPC3               | 0.00871238729987364 | 2 | 0.995653280799117  |
| 0.0313349602084209  |                     |   |                    |
| PRMT6               | 0.00227288957004563 | 2 | 0.9988642007238    |
| 0.0151619674475299  |                     |   |                    |
| VAV3                | 5.66743970241443    | 2 | 0.0587937424177704 |
| 1.56738796712645    |                     |   |                    |
| SLC25A24            | 3.47226588039129    | 2 | 0.176200462575721  |
| 0.974810703161425   |                     |   |                    |
| FAM102B             | 1.34636301292319    | 2 | 0.510083160648461  |
| 0.987142700304395   |                     |   |                    |
| HENMT1              | 5.59696529272421    | 2 | 0.0609024030337735 |
| 0.796771174052932   |                     |   |                    |
| PRPF38B             | 2.53740632127547    | 2 | 0.28119605153202   |
| STXBP3              | 1.87971810339398    | 2 | 0.0944352446773233 |
| 0.312822417586031   |                     |   | 0.390682897569394  |
| GPSM2               | 2.8666582212531     | 2 | 0.238513561025009  |
| 0.571341552549789   |                     |   |                    |
| CLCC1               | 0.203259223326865   | 2 | 0.903364085232231  |
| 0.242707877050285   |                     |   |                    |
| WDR47               | 4.54964932923701    | 2 | 0.102814933950653  |
| 2.57139917605392    |                     |   |                    |
| TAF13               | 2.0624699232017     | 2 | 0.356566342810615  |
| 0.663715702075426   |                     |   |                    |
| AL356488.3          | 1.34073334100793    | 2 | 0.511520983739146  |
| 0.695129863896171   |                     |   |                    |
| TMEM167B            | 6.89524754422246    | 2 | 0.0318211609408253 |
| 0.4804389104622     |                     |   |                    |
| KIAA1324            | 2.03907196870646    | 2 | 0.360762300693412  |
| 1.85791040532484    |                     |   |                    |
| SARS                | 2.54160975779134    | 2 | 0.280605677273953  |
| 0.17421268831221    |                     |   |                    |
| PSMA5               | 8.99394683905796    | 2 | 0.0111426697418434 |
| 0.210591256346102   |                     |   |                    |
| ATXN7L2             | 2.46959665267944    | 2 | 0.290893421993768  |
| 1.09421721667354    |                     |   |                    |
| GNAI3               | 0.00432764575828764 | 2 | 0.997838516497946  |
| 0.00813106756069407 |                     |   |                    |
| AMPD2               | 1.34616716608726    | 2 | 0.510133112180671  |
| 0.543127906994256   |                     |   |                    |
| GSTM4               | 0.499478887162159   | 2 | 0.779003731053046  |
| 0.229152139277625   |                     |   |                    |
| AHCYL1              | 2.56336071426303    | 2 | 0.277570490805851  |
| 0.429442938333792   |                     |   |                    |
| STRIP1              | 2.87016547087459    | 2 | 0.238095664250864  |
| 0.35445676653384    |                     |   |                    |
| RBM15               | 2.38136758482517    | 2 | 0.304013310981062  |
| 0.363513607686494   |                     |   |                    |
| SLC16A4             | 1.52399625539018    | 2 | 0.466732902730988  |

|                   |                     |   |                      |
|-------------------|---------------------|---|----------------------|
| 0.515580862787207 |                     |   |                      |
| LAMTOR5           | 31.9264057821652    | 2 | 1.16753274825854e-07 |
| 0.331615263519664 |                     |   |                      |
| CD53              | 196.36050833672     | 2 | 0                    |
| LRIF1             | 0.506560917370364   |   | 1.14126621479079     |
| 0.14295216641361  |                     |   | 0.776250145197007    |
| DRAM2             | 2.07552772572646    | 2 | 0.354245939449692    |
| 0.171402685907698 |                     |   |                      |
| CEPT1             | 2.6766087378549     | 2 | 0.262290038869749    |
| 0.320850884794477 |                     |   |                      |
| AL355816.2        | 1.53301859835725    | 2 | 0.464632132599587    |
| 0.408181505505226 |                     |   |                      |
| DENND2D           | 16.4885240889376    | 2 | 0.000262761956379309 |
| 0.630063828552735 |                     |   |                      |
| CHI3L2            | 7.15586467664847    | 2 | 0.0279333953967431   |
| 0.692275224841138 |                     |   |                      |
| WDR77             | 1.65268007895115    | 2 | 0.43764813357033     |
| ATP5PB            | 10.6748277641125    | 2 | 0.149168208520104    |
| 0.238806884066541 |                     |   | 0.00480828944883616  |
| C1orf162          | 8.4906524167862     | 2 | 0.0143310580050277   |
| 1.39251491127453  |                     |   |                      |
| RAP1A             | 9.27951660517015    | 2 | 0.00966003215020117  |
| 0.162967312642205 |                     |   |                      |
| DDX20             | 1.04070666232641    | 2 | 0.594310522439898    |
| 0.352023918541442 |                     |   |                      |
| CTTNBP2NL         | 1.37318871068313    | 2 | 0.503287170975169    |
| 0.634101319789421 |                     |   |                      |
| WNT2B             | 0.263291569782321   | 2 | 0.876651463283344    |
| 0.475049846471242 |                     |   |                      |
| ST7L              | 0.0439989948482049  | 2 | 0.978240726691298    |
| 0.125193918793287 |                     |   |                      |
| CAPZA1            | 2.83476538660373    | 2 | 0.242347485241344    |
| 0.11352678872706  |                     |   |                      |
| MOV10             | 3.37669293104383    | 2 | 0.184824885781338    |
| 14.0824043957195  |                     |   |                      |
| RHOC              | 0.419005390083767   | 2 | 0.810987453784992    |
| 0.43850882582529  |                     |   |                      |
| SLC16A1           | 0.204586913534078   | 2 | 0.902764590415341    |
| 0.161275797445612 |                     |   |                      |
| SLC16A1-AS1       | 2.55029066434887    | 2 | 0.27939036086204     |
| 0.693769235586272 |                     |   |                      |
| LRIG2             | 3.83355356433019    | 2 | 0.147080270683924    |
| 0.863704328836942 |                     |   |                      |
| PHTF1             | 4.35835009553573    | 2 | 0.113134822979046    |
| 0.877059857872631 |                     |   |                      |
| RSBN1             | 0.775158642505167   | 2 | 0.678697796956842    |
| 0.228170281519223 |                     |   |                      |
| PTPN22            | 5.47840200696921    | 2 | 0.0646219589915317   |
| 0.941932808465541 |                     |   |                      |
| AP4B1             | 0.00264556656775855 | 2 | 0.998678091208298    |

|                    |                    |                      |
|--------------------|--------------------|----------------------|
| 0.0253222608498444 |                    |                      |
| HIPK1-AS1          | 0.11043394025683   | 2 0.946279811226163  |
| 0.308721020438269  |                    |                      |
| HIPK1              | 0.431151964569616  | 2 0.806077020357455  |
| 0.380728077429036  |                    |                      |
| TRIM33             | 5.81953416511569   | 2 0.054488419694634  |
| 0.721971222070172  |                    |                      |
| BCAS2              | 0.933243804533846  | 2 0.62711715716785   |
| 0.137507443595696  |                    |                      |
| NRAS               | 0.0661108033186404 | 2 0.967484957832201  |
| 0.0695931871508113 |                    |                      |
| CSDE1              | 6.04337992333711   | 2 0.0487188158217812 |
| 0.198393456545938  |                    |                      |
| SIKE1              | 1.21929451820838   | 2 0.543542564954298  |
| 0.269627830976367  |                    |                      |
| VANGL1             | 1.28350263942697   | 2 0.526369774588963  |
| 1.16413302440332   |                    |                      |
| ATP1A1             | 3.29705226894951   | 2 0.192333173055762  |
| 0.327683364642891  |                    |                      |
| CD58               | 4.09988099683302   | 2 0.128742563746312  |
| 0.483133050924802  |                    |                      |
| TTF2               | 4.62833518465505   | 2 0.0988484319586418 |
| 0.389200569127607  |                    |                      |
| MAN1A2             | 4.05593171374792   | 2 0.131602948296378  |
| 0.323675905569117  |                    |                      |
| TENT5C             | 0.352692099506507  | 2 0.838327829997508  |
| 0.398328564022962  |                    |                      |
| GDAP2              | 0.254620397347874  | 2 0.880460512548959  |
| 0.168612068809343  |                    |                      |
| WDR3               | 0.153991728966528  | 2 0.925893682647398  |
| 0.126070443791071  |                    |                      |
| WARS2              | 1.70048740377367   | 2 0.427310782814536  |
| 0.490412143161765  |                    |                      |
| AL359915.2         | 1.76962018098195   | 2 0.412792559067933  |
| 1.13472427777725   |                    |                      |
| PHGDH              | 8.45476552612238   | 2 0.0145905274874406 |
| 0.618583664676961  |                    |                      |
| NOTCH2             | 2.19903130907954   | 2 0.333032347346816  |
| 1.48123631072654   |                    |                      |
| SEC22B             | 0.364607005367694  | 2 0.833348378560903  |
| 0.121688094973589  |                    |                      |
| LINC00623          | 5.17368656505837   | 2 0.0752572313324376 |
| 0.447228143946704  |                    |                      |
| SRGAP2C            | 4.56669892233441   | 2 0.101942182854706  |
| 1.09895370105686   |                    |                      |
| AL592494.3         | 2.74048073595032   | 2 0.25404588771761   |
| 2.06726742614127   |                    |                      |
| AC239800.3         | 1.71361540306313   | 2 0.42451510045487   |
| 0.6625707827677    |                    |                      |
| AC245595.1         | 1.46617710626402   | 2 0.48042288470858   |

0.36328207580749  
 NBPF15 8.92573858759108 2 0.01152923502032 0.915512278672084  
 SRGAP2B 7.12885656102565 2 0.0283131680477192  
 1.70879168163435  
 AC245014.3 5.24008485610659 2 0.0727997740092184  
 0.540007362124224  
 NBPF20 1.27716802941529 2 0.528039591224295  
 0.558414020379768  
 GPR89A 3.0364399656091 2 0.219101544567582  
 0.567243491590063  
 RNF115 4.25741652141313 2 0.118990899842492  
 0.391993219673883  
 POLR3C 0.191791445270199 2 0.908558753241794  
 0.129128285163159  
 NUDT17 2.7976189123835 2 0.246890723262132  
 0.649824706592435  
 PIAS3 0.0865215964253897 2 0.95766160106226  
 0.123367117942585  
 ITGA10 0.0631692514407601 2 0.968908958365631  
 0.219511646302959  
 PEX11B 1.6430229015787 2 0.439766466560199  
 0.262625813450696  
 RBM8A 10.674744993243 2 0.00480848844610304  
 0.227753566824209  
 LIX1L 2.89433645386782 2 0.235235479308499  
 0.622508813698137  
 POLR3GL 0.207966418600448 2 0.901240429751645  
 0.0779141901644304  
 TXNIP 0.179432054564372 2 0.914190753647229  
 0.125559972140625  
 NBPF12 1.64744389472246 2 0.438795437916577  
 0.542908886289809  
 PRKAB2 0.0241924154779543 2 0.987976657289103  
 0.0912825211176262  
 AC242426.2 2.65493365389628 2 0.265148077258716  
 1.32777459720573  
 CHD1L 1.70102115073923 2 0.427196760113189  
 0.345042293735019  
 BCL9 2.31597798609422 2 0.314117238089537  
 1.64622185112252  
 ACP6 1.13659900746652 2 0.566487930721902  
 0.558723298914233  
 GPR89B 0.159663754276715 2 0.923271556395229  
 0.174272912557399  
 NBPF11 2.7497240509394 2 0.25287448363598 1.3506227126808  
 NBPF14 1.04803286501282 2 0.592137485224512  
 1.05855188829068  
 PDE4DIP 4.09281970979396 2 0.129197911206461  
 0.672181235520811  
 NBPF9 0.10842278341196 2 0.947231848379703



|                     |                     |   |                      |
|---------------------|---------------------|---|----------------------|
| 0.256672754223678   |                     |   |                      |
| AC245297.3          | 0.0867206415135494  | 2 | 0.95756629688589     |
| 0.075804885675605   |                     |   |                      |
| NBPF19              | 2.89732647916323    | 2 | 0.234884062043825    |
| 2.23910536045325    |                     |   |                      |
| HIST2H2BE           | 18.2834130586742    | 2 | 0.000107104396670943 |
| 1.27710043798838    |                     |   |                      |
| HIST2H2AC           | 1.33244499738543    | 2 | 0.513645213126441    |
| 0.335649758638277   |                     |   |                      |
| BOLA1               | 4.07394266528248    | 2 | 0.130423121558653    |
| 0.321392768916958   |                     |   |                      |
| SF3B4               | 0.185826618929017   | 2 | 0.91127249557264     |
| 0.063989997233997   |                     |   |                      |
| VPS45               | 1.18495701156901    | 2 | 0.552955082560747    |
| 0.176942180130174   |                     |   |                      |
| PLEKH01             | 0.534466674567577   | 2 | 0.765494432233015    |
| 0.154361905929716   |                     |   |                      |
| ANP32E              | 0.743801660319375   | 2 | 0.689422609064266    |
| 0.141582185597565   |                     |   |                      |
| APH1A               | 0.00524920247442061 | 2 | 0.997378840017318    |
| 0.010749206359052   |                     |   |                      |
| MRPS21              | 8.0151527808455     | 2 | 0.0181773968069401   |
| 0.243539460506358   |                     |   |                      |
| PRPF3               | 0.0482714453382909  | 2 | 0.976153214647031    |
| 0.0643586093202011  |                     |   |                      |
| RPRD2               | 2.52633051054675    | 2 | 0.282757608540836    |
| 0.604923404717159   |                     |   |                      |
| TARS2               | 0.441285796417556   | 2 | 0.802003025876998    |
| 0.184490792773813   |                     |   |                      |
| MCL1                | 0.0044488537698968  | 2 | 0.997778045319116    |
| 0.00584579084816335 |                     |   |                      |
| ENSA                | 0.972058003205868   | 2 | 0.615063969213849    |
| 0.0491277992556764  |                     |   |                      |
| GOLPH3L             | 0.306653048629924   | 2 | 0.857849567332944    |
| 0.149704998431553   |                     |   |                      |
| CTSS                | 2.13290577924622    | 2 | 0.344227366909079    |
| 0.146251302537852   |                     |   |                      |
| ARNT                | 3.42852760155546    | 2 | 0.180096258645513    |
| 0.925427241547681   |                     |   |                      |
| SETDB1              | 0.00138296327530261 | 2 | 0.999308757380681    |
| 0.0164592327630261  |                     |   |                      |
| CERS2               | 3.94623026665381    | 2 | 0.139023105461066    |
| 0.403144254467346   |                     |   |                      |
| MINDY1              | 2.07309247864881    | 2 | 0.354677540354486    |
| 2.37579338693936    |                     |   |                      |
| PRUNE1              | 1.65518355279731    | 2 | 0.437100655962675    |
| 0.311131246955707   |                     |   |                      |
| C1orf56             | 3.51528651261823    | 2 | 0.172450807635281    |
| 0.735788058377025   |                     |   |                      |
| CDC42SE1            | 0.809507640414718   | 2 | 0.667141027284021    |

|                    |                    |   |                      |
|--------------------|--------------------|---|----------------------|
| 0.188129246641267  |                    |   |                      |
| MLLT11             | 5.89026888320504   | 2 | 0.052594988386414    |
| 3.27678835584133   |                    |   |                      |
| GABPB2             | 4.40547456527106   | 2 | 0.110500273530801    |
| 1.04643130044128   |                    |   |                      |
| TNFAIP8L2          | 2.79497430053914   | 2 | 0.247217404266147    |
| 0.342914186352586  |                    |   |                      |
| SCNM1              | 0.0904105309417728 | 2 | 0.955801268698405    |
| 0.0445888983357018 |                    |   |                      |
| LYSMD1             | 2.04421871419685   | 2 | 0.3598351183259      |
| VPS72              | 1.77723145909915   | 2 | 1.6595439521082      |
| 0.308258790598015  |                    |   | 0.411224605008025    |
| PIP5K1A            | 0.0148084254092939 | 2 | 0.992623130950542    |
| 0.0371060556265516 |                    |   |                      |
| PSMD4              | 1.06059176765049   | 2 | 0.588430836751196    |
| 0.089137597143469  |                    |   |                      |
| AL391069.2         | 2.3397364883635    | 2 | 0.31040783660983     |
| 2.2340158370492    |                    |   |                      |
| ZNF687             | 3.53820772605751   | 2 | 0.170485698928484    |
| 1.51434781390411   |                    |   |                      |
| PI4KB              | 0.0522493057100674 | 2 | 0.974213643527528    |
| 0.0543520621694459 |                    |   |                      |
| RFX5               | 0.814432976695196  | 2 | 0.66550010168799     |
| 0.17354661637686   |                    |   |                      |
| AL391069.3         | 0.0565183647249325 | 2 | 0.972136373544619    |
| 0.0571856778235231 |                    |   |                      |
| PSMB4              | 1.66354264843564   | 2 | 0.435277585328613    |
| 0.146814019605129  |                    |   |                      |
| POGZ               | 0.0236985244066078 | 2 | 0.988220663840894    |
| 0.0433784611273356 |                    |   |                      |
| SNX27              | 1.23693192795386   | 2 | 0.53877029702746     |
| MRPL9              | 0.755284842431104  | 2 | 0.334504846839473    |
| 0.104152681968009  |                    |   | 0.685475568368259    |
| TDRKH              | 0.208527203230771  | 2 | 0.900987764285413    |
| 0.291460971163226  |                    |   |                      |
| TDRKH-AS1          | 0.345764000538902  | 2 | 0.841236874712733    |
| 0.540651684066172  |                    |   |                      |
| THEM4              | 7.11177826818265   | 2 | 0.0285559735357563   |
| 0.910247098614951  |                    |   |                      |
| S100A10            | 6.48151821699909   | 2 | 0.0391341767345008   |
| 0.231581609681992  |                    |   |                      |
| S100A11            | 36.095174855164    | 2 | 1.45221984437782e-08 |
| 0.675930900827796  |                    |   |                      |
| S100A6             | 0.0117518292061197 | 2 | 0.994141314820427    |
| 0.0272482048100811 |                    |   |                      |
| S100A4             | 1.89664500948444   | 2 | 0.387390324134479    |
| 0.533640819450527  |                    |   |                      |
| S100A13            | 0.517237296882303  | 2 | 0.772117415086561    |
| 0.305457728290404  |                    |   |                      |
| CHTOP              | 0.0545395957448562 | 2 | 0.973098666155       |

|                               |   |                      |
|-------------------------------|---|----------------------|
| 0.0289983291597271            |   |                      |
| SNAPIN 0.340985972302912      | 2 | 0.843249004028671    |
| 0.0762118107348351            |   |                      |
| ILF2 6.80792835110687 2       |   | 0.0332412343385114   |
| 0.259236411957599             |   |                      |
| INTS3 0.868947104498501       | 2 | 0.647605507815705    |
| 0.474047053920274             |   |                      |
| SLC27A3 0.370147743489558     | 2 | 0.831042890996211    |
| 0.278148942165367             |   |                      |
| GATAD2B 3.24273022578384 2    |   | 0.197628729329722    |
| 0.533814758364272             |   |                      |
| DENND4B 1.52419108764283 2    |   | 0.466687437634127    |
| 0.379519938341958             |   |                      |
| CRTC2 3.0685990127977 2       |   | 0.215606669376198    |
| 0.650960284112995             |   |                      |
| SLC39A1 1.03743612185684 2    |   | 0.595283175806264    |
| 0.135363342453223             |   |                      |
| CREB3L4 0.0185023615704642    | 2 | 0.990791479732984    |
| 0.0575853099298091            |   |                      |
| JTB 0.516761051150718         | 2 | 0.772301295790401    |
| 0.0616141007655667            |   |                      |
| AL358472.2 3.22548959030531 2 |   | 0.199339715799206    |
| 3.94369790851997              |   |                      |
| RAB13 0.998576415086128       | 2 | 0.606962537346504    |
| 0.37600113434026              |   |                      |
| RPS27 63.2155324132402 2      |   | 1.87627691161651e-14 |
| 0.136259479448273             |   |                      |
| TPM3 5.68871713912086 2       |   | 0.0581715677898259   |
| 0.121888577719628             |   |                      |
| C1orf43 0.203448100668774     | 2 | 0.903278776756907    |
| 0.0470414462105246            |   |                      |
| UBAP2L 1.14580054388733 2     |   | 0.563887637318986    |
| 0.266893415833779             |   |                      |
| HAX1 3.43807258527996 2       |   | 0.179238798455103    |
| 0.130140226708726             |   |                      |
| UBE2Q1 1.08211381882434 2     |   | 0.582132665628148    |
| 0.211683582500582             |   |                      |
| ADAR 1.84661349100289 2       |   | 0.397203416454896    |
| 0.254551836060262             |   |                      |
| KCNN3 52.7166961588891 2      |   | 3.57036622489204e-12 |
| 1.01022707625007              |   |                      |
| PMVK 1.08558882058478 2       |   | 0.581122087803379    |
| 0.13672210912158              |   |                      |
| PBXIP1 0.129598404876738      | 2 | 0.937255643131519    |
| 0.0848258621974294            |   |                      |
| PYG02 2.1693779536062 2       |   | 0.338006897533632    |
| 0.388090842812961             |   |                      |
| AL451085.2 5.8410018070666 2  |   | 0.0539066784907921   |
| 2.40445862854125              |   |                      |
| SHC1 0.00375179911067599      | 2 | 0.998125858844534    |

|                             |   |                                   |  |
|-----------------------------|---|-----------------------------------|--|
| 0.0221275849198509          |   |                                   |  |
| CKS1B 0.982772241264296     | 2 | 0.611777808356669                 |  |
| 0.133366487812796           |   |                                   |  |
| FLAD1 6.46491382658414 2    |   | 0.0394604287390015                |  |
| 0.621629403487693           |   |                                   |  |
| ZBTB7B 0.0011782808172444   | 2 | 0.999411033100513                 |  |
| 0.0155800392052331          |   |                                   |  |
| ADAM15 1.2574425607423 2    |   | 0.533273272209453                 |  |
| 0.984506056519596           |   |                                   |  |
| EFNA4 5.30674543314749 2    |   | 0.0704133279282489                |  |
| 0.774410162759875           |   |                                   |  |
| EFNA3 1.81328468721685 2    |   | 0.403878033609025                 |  |
| 1.15718083220908            |   |                                   |  |
| SLC50A1 7.04607750398126 2  |   | 0.0295096263478274                |  |
| 0.262216352087078           |   |                                   |  |
| DPM3 0.0189379969293918     | 2 | 0.990575691334153                 |  |
| 0.0322910233869133          |   |                                   |  |
| KRTCAP2 0.841657682366076   | 2 | 0.656502457977528                 |  |
| 0.194670862496365           |   |                                   |  |
| MTX1 0.50107730222416 2     |   | 0.778381394125816                 |  |
| 0.0854382706471303          |   |                                   |  |
| GBA 4.06871354808823 2      |   | 0.130764566621944                 |  |
| 0.915206066941679           |   |                                   |  |
| FAM189B 0.8848636736051 2   |   | 0.642472132430438                 |  |
| 0.344353312335848           |   |                                   |  |
| SCAMP3 1.43033801995223 2   |   | 0.489109440435541                 |  |
| 0.144629671827638           |   |                                   |  |
| CLK2 3.92940699032715 2     |   | 0.14019744967557 1.07923502006058 |  |
| FDPS 6.93615064556971 2     |   | 0.0311769785726612                |  |
| 0.243365362081178           |   |                                   |  |
| RUSC1 3.35787640483824 2    |   | 0.186571972573826                 |  |
| 1.03474784544691            |   |                                   |  |
| ASH1L 0.00209494766002945   | 2 | 0.998953074579199                 |  |
| 0.00703191627130792         |   |                                   |  |
| ASH1L-AS1 0.159257343593429 | 2 | 0.923459189170621                 |  |
| 0.220430394283738           |   |                                   |  |
| MST01 2.25134204315387 2    |   | 0.324434691622028                 |  |
| 0.783711772747331           |   |                                   |  |
| YY1AP1 0.45738606676212 2   |   | 0.795572710291115                 |  |
| 0.165372601562583           |   |                                   |  |
| DAP3 2.78851628527764 2     |   | 0.248016961344215                 |  |
| 0.215159518132119           |   |                                   |  |
| GON4L 1.74560206207016 2    |   | 0.417779694922345                 |  |
| 0.295457920702018           |   |                                   |  |
| SYT11 0.000717559751631944  | 2 | 0.999641284477987                 |  |
| 0.00869055322531972         |   |                                   |  |
| RIT1 1.43775516807035 2     |   | 0.487298901187252                 |  |
| 0.249784139522098           |   |                                   |  |
| KHDC4 0.0121503132597924    | 2 | 0.993943259820995                 |  |
| 0.0319649736114717          |   |                                   |  |

|         |                     |   |                      |
|---------|---------------------|---|----------------------|
| ARHGEF2 | 1.11480357020909    | 2 | 0.572695117454237    |
|         | 0.239252244448642   |   |                      |
| SSR2    | 10.554556945061     | 2 | 0.00510630885919172  |
|         | 0.191035025299241   |   |                      |
| UBQLN4  | 0.412477620654336   | 2 | 0.813638747744468    |
|         | 0.27950342441716    |   |                      |
| LAMTOR2 | 1.64668993588943    | 2 | 0.438960885948025    |
|         | 0.116120128410642   |   |                      |
| RAB25   | 2.00716218086115    | 2 | 0.366564387693147    |
|         | 2.03211224116531    |   |                      |
| LMNA    | 0.781109237150534   | 2 | 0.676681470291752    |
|         | 0.489724169652144   |   |                      |
| SEMA4A  | 34.2288841663753    | 2 | 3.69225972018938e-08 |
|         | 0.845283472615644   |   |                      |
| SLC25A4 | 2.94344777144133    | 2 | 0.229529461373966    |
|         | 0.913692235954122   |   |                      |
| PMF1    | 0.602578438856977   | 2 | 0.739863758826221    |
|         | 0.071966413617703   |   |                      |
| SMG5    | 3.42154873596829    | 2 | 0.180725790151602    |
|         | 0.710729706383204   |   |                      |
| TMEM79  | 1.60864717100691    | 2 | 0.447390445616715    |
|         | 0.490645498203788   |   |                      |
| GLMP    | 0.0441252974075693  | 2 | 0.978178951488182    |
|         | 0.0896534950031737  |   |                      |
| CCT3    | 0.173596201798973   | 2 | 0.916862190598847    |
|         | 0.0331537400510146  |   |                      |
| TSACC   | 0.750610662025474   | 2 | 0.687079460093144    |
|         | 0.672598993809865   |   |                      |
| C1orf61 | 0.0171590897694688  | 2 | 0.991457154381152    |
|         | 0.132819150043031   |   |                      |
| MEF2D   | 0.0808949010455361  | 2 | 0.960359629581934    |
|         | 0.138774760072097   |   |                      |
| TTC24   | 0.0521931749743004  | 2 | 0.974240985575511    |
|         | 0.1789119829386     |   |                      |
| NAXE    | 0.0254100815162223  | 2 | 0.987375327551287    |
|         | 0.0242519835337752  |   |                      |
| GPATCH4 | 0.00301278640861188 | 2 | 0.998494740836429    |
|         | 0.00889497430367096 |   |                      |
| ISG20L2 | 4.70272367101173    | 2 | 0.0952393734997796   |
|         | 0.382739581502624   |   |                      |
| RRNAD1  | 6.3014328660925     | 2 | 0.0428214371821155   |
|         | 0.581361770576156   |   |                      |
| MRPL24  | 2.18969409552971    | 2 | 0.334590779442609    |
|         | 0.329820321655872   |   |                      |
| HDGF    | 0.63063573787982    | 2 | 0.729556933918504    |
|         | 0.145689066051212   |   |                      |
| PRCC    | 1.11378609833726    | 2 | 0.572986542163635    |
|         | 0.0923241637491618  |   |                      |
| ETV3    | 0.0240319198605958  | 2 | 0.988055943432104    |
|         | 0.0941756322465621  |   |                      |

|            |                    |   |                      |
|------------|--------------------|---|----------------------|
| FCRL5      | 32.2377568118068   | 2 | 9.99217550923248e-08 |
|            | 2.23840904233134   |   |                      |
| FCRL4      | 1.3281523930089    | 2 | 0.514748834900618    |
|            | 0.982661585039773  |   |                      |
| FCRL3      | 5.88791886961372   | 2 | 0.0526568241768083   |
|            | 0.408649690417527  |   |                      |
| FCRL2      | 2.8263473596558    | 2 | 0.243369678776207    |
|            | 0.250272376190382  |   |                      |
| FCRL1      | 1.56574208737108   | 2 | 0.457091795109851    |
|            | 0.210371838010994  |   |                      |
| CD1C       | 7.25551095734036   | 2 | 0.0265757673930105   |
|            | 1.07661514248618   |   |                      |
| PYHIN1     | 5.65238897856231   | 2 | 0.0592378555686681   |
|            | 2.95025658458568   |   |                      |
| IFI16      | 16.8463119755864   | 2 | 0.000219720123415978 |
|            | 0.331786220125743  |   |                      |
| AIM2       | 23.2374231087015   | 2 | 8.99617065142078e-06 |
|            | 0.544917741676543  |   |                      |
| DUSP23     | 10.8740070741672   | 2 | 0.00435250587256375  |
|            | 0.503828004674505  |   |                      |
| TAGLN2     | 85.712322263342    | 2 | 0                    |
|            |                    |   | 0.876224796926044    |
| PIGM       | 0.0209899833751583 | 2 | 0.98955988858057     |
|            | 0.108673096408624  |   |                      |
| IGSF8      | 2.8708045613702    | 2 | 0.23801959406741     |
|            |                    |   | 0.297734822538013    |
| AL121987.2 | 5.2966120341996    | 2 | 0.0707709964340819   |
|            | 2.14624590741528   |   |                      |
| PEA15      | 2.56368301262963   | 2 | 0.277525764151878    |
|            | 0.226387621559833  |   |                      |
| DCAF8      | 8.53782526397794   | 2 | 0.013996994765888    |
|            | 0.73399367487334   |   |                      |
| PEX19      | 2.06662198074911   | 2 | 0.355826868673586    |
|            | 0.404555526865759  |   |                      |
| COPA       | 2.08249115371424   | 2 | 0.353014701058789    |
|            | 0.317028375147951  |   |                      |
| NCSTN      | 0.793068719483995  | 2 | 0.672647164321149    |
|            | 0.283020260123061  |   |                      |
| SLAMF6     | 2.34436888113338   | 2 | 0.309689703090999    |
|            | 0.35888093126714   |   |                      |
| CD84       | 3.12938592389476   | 2 | 0.209152221006293    |
|            | 0.792963208768877  |   |                      |
| SLAMF1     | 38.2408513307986   | 2 | 4.96711993758225e-09 |
|            | 2.61013946831211   |   |                      |
| CD48       | 15.4652457906959   | 2 | 0.000438293011446156 |
|            | 0.577072677341318  |   |                      |
| SLAMF7     | 5.40262486253578   | 2 | 0.0671173679780787   |
|            | 1.90948114745936   |   |                      |
| LY9        | 5.88936630155324   | 2 | 0.0526187293788042   |
|            | 0.229782057514773  |   |                      |
| F11R       | 0.044807914378395  | 2 | 0.977845147680063    |
|            | 0.165914221982312  |   |                      |

|          |                     |   |                     |
|----------|---------------------|---|---------------------|
| TSTD1    | 0.00827708652494957 | 2 | 0.995870008706061   |
|          | 0.013307189338596   |   |                     |
| USF1     | 3.06852196669214    | 2 | 0.215614975363287   |
|          | 1.57410717584585    |   |                     |
| ARHGAP30 | 0.970329067764639   | 2 | 0.615595902047603   |
|          | 0.0717651915178197  |   |                     |
| PFDN2    | 4.32317716227295    | 2 | 0.115142063165858   |
|          | 0.159546213013013   |   |                     |
| NIT1     | 2.07848165979281    | 2 | 0.353723116066982   |
|          | 0.312689140965284   |   |                     |
| DEDD     | 0.99457190170443    | 2 | 0.608179049626507   |
|          | 0.31851518280739    |   |                     |
| UFC1     | 0.626933613505356   | 2 | 0.730908639832206   |
|          | 0.0791951402681983  |   |                     |
| USP21    | 5.37940415678001    | 2 | 0.0679011655832703  |
|          | 1.8097474303212     |   |                     |
| PPOX     | 0.111113573019548   | 2 | 0.945958304474684   |
|          | 0.126604702135885   |   |                     |
| B4GALT3  | 0.241601001873076   | 2 | 0.886210740171204   |
|          | 0.110049738629289   |   |                     |
| NDUFS2   | 6.4940337591538     | 2 | 0.0388900486606599  |
|          | 0.187689992124608   |   |                     |
| TOMM40L  | 0.00232473459515774 | 2 | 0.998838307989619   |
|          | 0.028434073850689   |   |                     |
| MPZ      | 1.94364005489331    | 2 | 0.378393724045021   |
|          | 4.54808386162489    |   |                     |
| SDHC     | 0.207707066983097   | 2 | 0.901357306411058   |
|          | 0.0426373693200555  |   |                     |
| FCGR2B   | 1.06386511686196    | 2 | 0.587468554629616   |
|          | 0.446157308718851   |   |                     |
| FCRLA    | 24.1493116004551    | 2 | 5.7022153528985e-06 |
|          | 0.61088279886364    |   |                     |
| FCRLB    | 8.3761060815894     | 2 | 0.0151758027975798  |
|          | 1.45821282298638    |   |                     |
| DUSP12   | 1.90153454459931    | 2 | 0.386444401589486   |
|          | 0.311485462868673   |   |                     |
| ATF6     | 6.59985941634418    | 2 | 0.0368857600776166  |
|          | 0.32807440772951    |   |                     |
| UHMK1    | 5.68536133950911    | 2 | 0.0582692557845428  |
|          | 0.496185506914693   |   |                     |
| UAP1     | 0.115325558161079   | 2 | 0.943968219600722   |
|          | 0.13312999066232    |   |                     |
| HSD17B7  | 0.086678812416239   | 2 | 0.957586324162227   |
|          | 0.0639674907253298  |   |                     |
| RGS5.1   | 0.00686411842931335 | 2 | 0.996573823568625   |
|          | 0.0677538088115224  |   |                     |
| NUF2     | 2.24271566235578    | 2 | 0.325837062391021   |
|          | 1.04256208707987    |   |                     |
| MGST3    | 0.592935935291182   | 2 | 0.743439440998353   |
|          | 0.362120247242194   |   |                     |

|            |                     |   |                      |
|------------|---------------------|---|----------------------|
| ALDH9A1    | 0.197875555023955   | 2 | 0.90579906734174     |
|            | 0.0856164109447561  |   |                      |
| TMC01      | 17.7834785748555    | 2 | 0.000137520262589508 |
|            | 0.277471635956635   |   |                      |
| UCK2       | 0.101901377200721   | 2 | 0.950325531259093    |
|            | 0.370654600462315   |   |                      |
| POGK       | 1.7797151180917     | 2 | 0.410714251115776    |
|            | 0.464974065185504   |   |                      |
| TADA1      | 0.00150533525122595 | 2 | 0.999247615557612    |
|            | 0.0268662031957895  |   |                      |
| POU2F1     | 0.436377699295436   | 2 | 0.803973597198518    |
|            | 0.175591386724911   |   |                      |
| CD247      | 0.451154769062478   | 2 | 0.798055300922941    |
|            | 0.360510246576727   |   |                      |
| CREG1      | 0.160472448318753   | 2 | 0.922898309757478    |
|            | 0.149848410414398   |   |                      |
| AL031733.2 | 0.130988579387938   | 2 | 0.936604395042083    |
|            | 0.2942701362701     |   |                      |
| RCSD1      | 69.885483221009     | 2 | 6.66133814775094e-16 |
|            | 0.812442146238738   |   |                      |
| MPZL1      | 8.23506598432174    | 2 | 0.0162846392601912   |
|            | 0.548674913290885   |   |                      |
| MPC2       | 0.0184379462673579  | 2 | 0.99082339131362     |
|            | 0.0136486530564248  |   |                      |
| DCAF6      | 1.59375956771857    | 2 | 0.450733157157205    |
|            | 0.246690390805538   |   |                      |
| TIPRL      | 0.458808299566429   | 2 | 0.795007166595251    |
|            | 0.102580222747267   |   |                      |
| SFT2D2     | 0.0579829481207343  | 2 | 0.971424746740046    |
|            | 0.0657207821184202  |   |                      |
| TBX19      | 1.51025514788821    | 2 | 0.46995065744722     |
|            | 0.513726523417689   |   | 1.34915068532464     |
| ATP1B1     | 0.708262860949585   | 2 | 0.773473970043735    |
|            | 0.622543945922695   |   |                      |
| NME7       | 0.237825461017835   | 2 | 0.732514624603399    |
|            | 0.879031169175567   |   |                      |
| BLZF1      | 5.33014615078528    | 2 | 0.0695942677190083   |
|            | 0.796659016583189   |   |                      |
| C1orf112   | 2.31881553939164    | 2 | 0.313671891885279    |
|            | 0.70516420902616    |   |                      |
| SELL       | 21.5468834888887    | 2 | 2.09485370529228e-05 |
|            | 0.70516420902616    |   |                      |
| METT18     | 0.48096834067932    | 2 | 0.786247091374009    |
|            | 0.18840981132936    |   |                      |
| SCYL3      | 3.5961337572514     | 2 | 0.165618740092194    |
|            | 0.790072450457523   |   |                      |
| KIFAP3     | 0.0352565917962439  | 2 | 0.982526173500759    |
|            | 0.0747631155979297  |   |                      |
| GORAB      | 0.675897204230033   | 2 | 0.713231945569716    |
|            | 0.33482709995236    |   |                      |
| FM04       | 4.38142340842415    | 2 | 0.111837125333411    |



|                                |   |                     |                   |
|--------------------------------|---|---------------------|-------------------|
| 2.94462911265554               |   |                     |                   |
| PRRC2C 2.55077891088261 2      |   | 0.279322163499035   |                   |
| 0.153636113692794              |   |                     |                   |
| VAMP4 5.35890205875829 2       |   | 0.0686008036448683  |                   |
| 0.376636298484744              |   |                     |                   |
| METTL13 2.02883200208528 2     |   | 0.36261413428523    | 0.461441374778916 |
| PIGC 2.51403017252098 2        |   | 0.284501974196522   |                   |
| 0.550810209058207              |   |                     |                   |
| SUC0 0.691382995843964         | 2 | 0.707730789850691   |                   |
| 0.40676985196454               |   |                     |                   |
| AL645568.1 0.00533378052189003 | 2 | 0.997336662731705   |                   |
| 0.0398853061285722             |   |                     |                   |
| PRDX6 5.70932142260996 2       |   | 0.0575753524735251  |                   |
| 0.195128955715439              |   |                     |                   |
| KLHL20 0.236191844982632       | 2 | 0.888610810763599   |                   |
| 0.197635370931377              |   |                     |                   |
| CENPL 3.51662924321546 2       |   | 0.172335069003115   |                   |
| 1.04375577441731               |   |                     |                   |
| DARS2 3.63953850308113 2       |   | 0.162063142440148   |                   |
| 1.27158124656539               |   |                     |                   |
| ZBTB37 1.24465607931776 2      |   | 0.536693538246292   |                   |
| 0.26937376803134               |   |                     |                   |
| RC3H1 6.67328933585025 2       |   | 0.035556060184895   |                   |
| 0.716156947361848              |   |                     |                   |
| AL121983.2 0.0844742776559049  | 2 | 0.958642422275366   |                   |
| 0.0508563725558224             |   |                     |                   |
| RABGAP1L 5.46248582562561 2    |   | 0.0651382781329237  |                   |
| 0.316106699531508              |   |                     |                   |
| CACYBP 0.0777185968389692      | 2 | 0.96188603851151    |                   |
| 0.0322573251542164             |   |                     |                   |
| MRPS14 5.27154958893829 2      |   | 0.0716634234688825  |                   |
| 0.301521018948164              |   |                     |                   |
| KIAA0040 36.9844468464996 2    |   | 9.3095654518649e-09 |                   |
| 0.496412936776027              |   |                     |                   |
| COP1 0.0216142919884163        | 2 | 0.989251041406178   |                   |
| 0.0309888171918355             |   |                     |                   |
| C1orf220 0.142366361358144     | 2 | 0.931291281932385   |                   |
| 0.279667167970082              |   |                     |                   |
| AL137796.1 0.350331333060271   | 2 | 0.839317962356359   |                   |
| 0.552640305037656              |   |                     |                   |
| RALGPS2 3.11112820483605 2     |   | 0.211070283794694   |                   |
| 0.289895922304599              |   |                     |                   |
| FAM20B 2.22865255743843 2      |   | 0.328136276838426   |                   |
| 1.08952279758607               |   |                     |                   |
| TOR3A 9.22899047397756 2       |   | 0.00990718292456116 |                   |
| 0.354525902373717              |   |                     |                   |
| ABL2 3.79774153142376 2        |   | 0.149737612634507   |                   |
| 1.22103077342558               |   |                     |                   |
| SOAT1 0.799935493860906        | 2 | 0.67034166626336    |                   |
| 0.310719146043898              |   |                     |                   |

|                             |                                    |
|-----------------------------|------------------------------------|
| TOR1AIP2 0.3564695738683 2  | 0.836745943409477                  |
| 0.135770703636592           |                                    |
| TOR1AIP1 0.895551270634579  | 2 0.639048047760909                |
| 0.240823818146033           |                                    |
| CEP350 1.8691443585177 2    | 0.39275385784021 0.266068185697168 |
| QSOX1 0.263228509224111     | 2 0.876679104784429                |
| 0.123284745935808           |                                    |
| ACBD6 0.24381615615392 2    | 0.885229736782543                  |
| 0.0701813653065109          |                                    |
| XPR1 0.0591482127626641     | 2 0.970858928133321                |
| 0.160032287496938           |                                    |
| STX6 0.705401364319212      | 2 0.70278751874097                 |
| 0.260775046519381           |                                    |
| MR1 0.601573356338877       | 2 0.74023566433221                 |
| 0.247821565708254           |                                    |
| IER5 3.12279165912092 2     | 0.209842961673925                  |
| 0.62561676986281            |                                    |
| GLUL 12.4806357973709 2     | 0.00194923576485295                |
| 0.77949735355544            |                                    |
| RNASEL 1.83199032527136 2   | 0.400118245169346                  |
| 0.439316515680515           |                                    |
| RGS16 1.49478916345809 2    | 0.473598869841758                  |
| 0.236353031320737           |                                    |
| DHX9 0.00104782673847911    | 2 0.999476223849405                |
| 0.00515094478013654         |                                    |
| SMG7 5.08040405130853 2     | 0.0788504683639905                 |
| 0.72160235152309            |                                    |
| NCF2 21.005217822639 2      | 2.74647028262187e-05               |
| 2.45890749934706            |                                    |
| ARPC5 18.3361817183444 2    | 0.00010431547267431                |
| 0.26831643073346            |                                    |
| TSEN15 12.7841587507153 2   | 0.00167477010251038                |
| 0.909335625256723           |                                    |
| C1orf21 3.92738070759263 2  | 0.140339561488943                  |
| 1.52516794669461            |                                    |
| EDEM3 0.228802056853962     | 2 0.891900206816467                |
| 0.246009248458951           |                                    |
| FAM129A 12.7667949844491 2  | 0.00168937356185095                |
| 0.684927279348857           |                                    |
| RNF2 0.769210356870354      | 2 0.680719345832246                |
| 0.28107304025161            |                                    |
| TRMT1L 2.44046474917874 2   | 0.2951615709055 0.305171142004128  |
| SWT1 3.25167061176924 2     | 0.196747262400196                  |
| 2.31667394495793            |                                    |
| IVNS1ABP 2.66408215570972 2 | 0.263937993150026                  |
| 0.489597343721465           |                                    |
| TPR 0.0495330352461057      | 2 0.975537656290954                |
| 0.0261316152880711          |                                    |
| ODR4 0.0658754894004822     | 2 0.967598795867082                |
| 0.0989061210102643          |                                    |

|                    |                      |   |                      |
|--------------------|----------------------|---|----------------------|
| AL390957.1         | 1.91750144098236     | 2 | 0.383371525126424    |
| 1.05086021443321   |                      |   |                      |
| AL136987.1         | 2.41025073037629     | 2 | 0.299654430924287    |
| 0.905856952973372  |                      |   |                      |
| RGS1               | 69.693139639911      | 2 | 7.7715611723761e-16  |
| 0.435183762249578  |                      |   |                      |
| RGS13              | 306.830537399696     | 2 | 0.943644954557975    |
| RGS2               | 27.3224285108441     | 2 | 1.16683657225281e-06 |
| 0.383308614680701  |                      |   |                      |
| UCHL5              | 0.0868584403159141   | 2 | 0.957500323414235    |
| 0.0720398999463679 |                      |   |                      |
| TROVE2             | 0.605109795611092    | 2 | 0.738927921624091    |
| 0.116642084515184  |                      |   |                      |
| GLRX2              | 0.54029097869065     | 2 | 0.76326843883288     |
| CDC73              | 2.1198097690462      | 2 | 0.247062747287455    |
| 0.267477587358841  |                      |   | 0.346488765206917    |
| ASPM               | 0.988460461091683    | 2 | 0.610040317006339    |
| 0.632975294791443  |                      |   |                      |
| ZBTB41             | 0.0194008051440653   | 2 | 0.990346494570109    |
| 0.122401083848401  |                      |   |                      |
| DENND1B            | 7.62338164522679     | 2 | 0.0221107619568804   |
| 0.989481330874888  |                      |   |                      |
| C1orf53            | 0.859111613934773    | 2 | 0.650798110515493    |
| 0.844295493757506  |                      |   |                      |
| NEK7               | 1.95400907883977     | 2 | 0.37643701392852     |
| AL157402.1         | 3.63451761252968     | 2 | 0.465912853388316    |
| 2.33547037199182   |                      |   | 0.162470504206222    |
| PTPRC              | 17.0897929091234     | 2 | 0.000194535390616313 |
| 0.238083668487718  |                      |   |                      |
| MIR181A1HG         | 1.17953876917954     | 2 | 0.554455135890335    |
| 0.364404579703001  |                      |   |                      |
| ZNF281             | 4.10984178934915     | 2 | 0.128102968803766    |
| 0.465237408898803  |                      |   |                      |
| DDX59              | 0.0248928011850685   | 2 | 0.987630735497444    |
| 0.0615029544109552 |                      |   |                      |
| KIF21B             | 0.000396144683405694 | 2 | 0.999801947273328    |
| 0.0187071926017122 |                      |   |                      |
| TMEM9              | 4.12407697773459     | 2 | 0.127194421029712    |
| 0.495883011940651  |                      |   |                      |
| CSRP1              | 0.590605185834165    | 2 | 0.744306331563137    |
| 0.219223939366175  |                      |   |                      |
| IP09               | 2.58018992655858     | 2 | 0.275244643714657    |
| 0.287951637390983  |                      |   |                      |
| TIMM17A            | 0.085692134988901    | 2 | 0.958058855116939    |
| 0.0387959118051764 |                      |   |                      |
| RNPEP              | 2.4151328982843      | 2 | 0.298923841379211    |
| 0.252505826319088  |                      |   |                      |
| ARL8A              | 0.183405866927913    | 2 | 0.912376145712327    |
| 0.130623601359674  |                      |   |                      |
| PTPN7              | 6.82552314945313     | 2 | 0.0329500805070659   |

|                              |   |                                   |
|------------------------------|---|-----------------------------------|
| 0.220186700440384            |   |                                   |
| UBE2T 2.3551159982511 2      |   | 0.308030030503885                 |
| 0.445245174473873            |   |                                   |
| PPP1R12B 1.53694154979322 2  |   | 0.4637216611794 0.697523996894178 |
| KDM5B 0.478458949865739      |   | 2 0.787234211125969               |
| 0.291457009394971            |   |                                   |
| RABIF 2.63187304794481 2     |   | 0.268223008299149                 |
| 0.184531989578623            |   |                                   |
| KLHL12 0.146383975590301     | 2 | 0.929422375143194                 |
| 0.11251779893401             |   |                                   |
| ADIPOR1 0.471370423939852    | 2 | 0.790029326569724                 |
| 0.134244866959567            |   |                                   |
| CYB5R1 0.0803605190723313    | 2 | 0.960616263302437                 |
| 0.0903491846868767           |   |                                   |
| TMEM183A 0.142985218505751   | 2 | 0.93100315837835                  |
| 0.0205363752556314           |   |                                   |
| LINC01353 6.08168842742426 2 |   | 0.0477945236656596                |
| 1.1900575271527              |   |                                   |
| LINC01136 2.23052864584636 2 |   | 0.327828614828669                 |
| 1.01785424195083             |   |                                   |
| BTG2 9.24218351123849 2      |   | 0.00984204508550912               |
| 0.152150193756076            |   |                                   |
| PRELP 9.31992395566733 2     |   | 0.00946682234396123               |
| 2.25756209873179             |   |                                   |
| ATP2B4 6.90385928592603 2    |   | 0.0316844376990143                |
| 1.74718854297709             |   |                                   |
| LAX1 1.50045991511739 2      |   | 0.472257940970264                 |
| 0.428112051335842            |   |                                   |
| SNRPE 13.5514492411079 2     |   | 0.00114114330439097               |
| 0.267867240968189            |   |                                   |
| PPP1R15B 0.669907850683577   | 2 | 0.715371046069692                 |
| 0.327353248470821            |   |                                   |
| PIK3C2B 0.590854890975702    | 2 | 0.744213408805146                 |
| 0.340749736640168            |   |                                   |
| MDM4 2.12150170178232 2      |   | 0.346195771313605                 |
| 0.104214690061037            |   |                                   |
| RBBP5 0.582268588616465      | 2 | 0.747415297657625                 |
| 0.207447499916881            |   |                                   |
| DSTYK 4.2511397203437 2      |   | 0.119364927563583                 |
| 1.03678430564954             |   |                                   |
| TMCC2 0.00696133955268548    | 2 | 0.996525380732726                 |
| 0.0743186911396957           |   |                                   |
| NUAK2 12.2298140133024 2     |   | 0.00220968124552046               |
| 1.43225484729378             |   |                                   |
| ELK4 1.01038711658706 2      |   | 0.603388773222108                 |
| 0.192220025639577            |   |                                   |
| SLC45A3 0.122846699257866    | 2 | 0.940425026904142                 |
| 0.205047158482355            |   |                                   |
| NUCKS1 2.08425537554071 2    |   | 0.352703440241918                 |
| 0.143282195683684            |   |                                   |

|            |                    |   |                      |
|------------|--------------------|---|----------------------|
| RAB29      | 0.841612509889455  | 2 | 0.656517286065951    |
|            | 0.23002204431032   |   |                      |
| SLC41A1    | 5.46310209702262   | 2 | 0.0651182097961361   |
|            | 0.542535295557903  |   |                      |
| RHEX       | 9.00169784043072   | 2 | 0.0110995698883116   |
|            | 2.05137169553812   |   |                      |
| SRGAP2     | 1.94460875106124   | 2 | 0.378210494146903    |
|            | 0.736105990495743  |   |                      |
| IKBKE      | 2.65062886719619   | 2 | 0.265719394846508    |
|            | 0.337248855683241  |   |                      |
| RASSF5     | 5.84014231130697   | 2 | 0.0539298497501247   |
|            | 0.39885521853172   |   |                      |
| EIF2D      | 1.5812503098812    | 2 | 0.453561160633358    |
|            | 0.254502742415367  |   |                      |
| MAPKAPK2   | 0.156528774566862  | 2 | 0.924719910036487    |
|            | 0.126244118827233  |   |                      |
| FCMR       | 9.41034552543742   | 2 | 0.00904835086516687  |
|            | 1.21917792435169   |   |                      |
| YOD1       | 0.375707702756388  | 2 | 0.828735816979947    |
|            | 0.616251664005177  |   |                      |
| CD55       | 7.2106595476663    | 2 | 0.0271784805833292   |
|            | 0.350834953318334  |   |                      |
| CR2        | 6.43696799471448   | 2 | 0.0400156761714155   |
|            | 0.75861061428744   |   |                      |
| CR1        | 8.92698519482208   | 2 | 0.0115220510455792   |
|            | 0.81923748670385   |   |                      |
| CD46       | 19.5123572925325   | 2 | 5.79355920552471e-05 |
|            | 0.461848243310729  |   |                      |
| MIR29B2CHG | 2.15619693851913   | 2 | 0.340241891323609    |
|            | 0.583652202517182  |   |                      |
| TRAF3IP3   | 0.0763576152926791 | 2 | 0.962540815845234    |
|            | 0.0555776161036082 |   |                      |
| C1orf74    | 1.44372618166102   | 2 | 0.48584623655546     |
|            | 1.30156544013684   |   |                      |
| UTP25      | 2.62975141003716   | 2 | 0.268507695324203    |
|            | 0.464204757298873  |   |                      |
| RCOR3      | 0.251676818025877  | 2 | 0.881757319307544    |
|            | 0.178720560643411  |   |                      |
| TRAF5      | 23.6704859541459   | 2 | 7.24468126411804e-06 |
|            | 0.908066589186203  |   |                      |
| LINC00467  | 2.66397939814195   | 2 | 0.263951554311511    |
|            | 0.358885333425842  |   |                      |
| LPGAT1     | 1.64822747090387   | 2 | 0.43862355676244     |
|            | 0.276887104920594  |   |                      |
| INTS7      | 2.31136967185551   | 2 | 0.314841848047001    |
|            | 0.331894662840236  |   |                      |
| DTL        | 0.673506665094146  | 2 | 0.714084959698499    |
|            | 0.750104673812754  |   |                      |
| PPP2R5A    | 2.12781630217337   | 2 | 0.345104451056549    |
|            | 0.349168830943542  |   |                      |
| TMEM206    | 0.106039684308583  | 2 | 0.948361194766456    |
|            | 0.0902574174570821 |   |                      |

|            |                     |   |                      |                  |
|------------|---------------------|---|----------------------|------------------|
| NENF       | 0.65554333364159    | 2 | 0.72052752126364     | 0.16736492845736 |
| NSL1       | 3.1184128534149     | 2 | 0.210302895759673    |                  |
|            | 0.279589983026722   |   |                      |                  |
| TATDN3     | 6.57314824409894    | 2 | 0.0373816954048054   |                  |
|            | 0.574494113663501   |   |                      |                  |
| FLVCR1-DT  | 4.06453758278687    | 2 | 0.131037886012148    |                  |
|            | 1.37160257980676    |   |                      |                  |
| FLVCR1     | 6.38935793931756    | 2 | 0.0409796789849438   |                  |
|            | 1.49411043782848    |   |                      |                  |
| ANGEL2     | 2.15139970088051    | 2 | 0.341058981479416    |                  |
|            | 0.553410851976696   |   |                      |                  |
| RPS6KC1    | 1.53412941385252    | 2 | 0.464374143964417    |                  |
|            | 0.415484981689414   |   |                      |                  |
| SMYD2      | 0.795451460275605   | 2 | 0.671846269578627    |                  |
|            | 0.23147852545574    |   |                      |                  |
| CENPF      | 0.0357787100495393  | 2 | 0.98226970955358     |                  |
|            | 0.0958724828639382  |   |                      |                  |
| KCTD3      | 2.88526375048349    | 2 | 0.236305014232281    |                  |
|            | 2.60841383679807    |   |                      |                  |
| GPATCH2    | 1.97874426972488    | 2 | 0.371810064328083    |                  |
|            | 0.420098990156418   |   |                      |                  |
| RRP15      | 0.031013337909718   | 2 | 0.984612940390585    |                  |
|            | 0.0360357085977368  |   |                      |                  |
| LYPLAL1-DT | 0.00874512874594277 | 2 | 0.995636981368435    |                  |
|            | 0.0964084495118382  |   |                      |                  |
| LYPLAL1    | 15.2053781803785    | 2 | 0.000499107482213601 |                  |
|            | 0.305473655893005   |   |                      |                  |
| AC096642.1 | 1.74313400013527    | 2 | 0.418295566238572    |                  |
|            | 0.627463321975476   |   |                      |                  |
| ZC3H11B    | 6.48745217825327    | 2 | 0.0390182384686169   |                  |
|            | 1.23755927535368    |   |                      |                  |
| EPRS       | 0.00117473877695912 | 2 | 0.999412803079151    |                  |
|            | 0.00550227160963788 |   |                      |                  |
| BPNT1      | 10.0283545620869    | 2 | 0.00664309518992678  |                  |
|            | 0.55657448462475    |   |                      |                  |
| IARS2      | 0.343464409674626   | 2 | 0.842204681311805    |                  |
|            | 0.112445547812549   |   |                      |                  |
| RAB3GAP2   | 12.5537439265858    | 2 | 0.00187926983486264  |                  |
|            | 0.829572766505599   |   |                      |                  |
| C1orf115   | 5.18696445480036    | 2 | 0.0747592575617225   |                  |
|            | 3.08076238735275    |   |                      |                  |
| MARC2      | 0.472742592134372   | 2 | 0.789487485907781    |                  |
|            | 0.59034073361411    |   |                      |                  |
| DUSP10     | 10.5755537348887    | 2 | 0.0050529812292921   |                  |
|            | 1.03907478974146    |   |                      |                  |
| TAF1A      | 1.61273919336326    | 2 | 0.446476015550039    |                  |
|            | 0.520361340969949   |   |                      |                  |
| MIA3       | 0.940154399826887   | 2 | 0.624954020024092    |                  |
|            | 0.141676478375027   |   |                      |                  |
| AIDA       | 4.82976449209875    | 2 | 0.089377862898576    |                  |

|                               |  |                      |
|-------------------------------|--|----------------------|
| 0.528305883346169             |  |                      |
| BROX 2.72206642229625 2       |  | 0.256395729126285    |
| 0.453524221773545             |  |                      |
| AL392172.1 1.35907370742847 2 |  | 0.506851684488107    |
| 0.573009939476968             |  |                      |
| TP53BP2 1.11119178920226 2    |  | 0.573730276538856    |
| 0.669453017855593             |  |                      |
| FBX028 0.9676138657322 2      |  | 0.616432203223019    |
| 0.332845980953384             |  |                      |
| DEGS1 11.6767896385695 2      |  | 0.0029135155933746   |
| 0.47600772517749              |  |                      |
| NVL 9.52903500978071 2        |  | 0.00852700148652796  |
| 0.436703947480126             |  |                      |
| CNIH4 0.367286293253824 2     |  | 0.832232735901915    |
| 0.122991561280893             |  |                      |
| WDR26 0.0153799430941815 2    |  | 0.992339520637666    |
| 0.0351134119378347            |  |                      |
| CNIH3 0.22470581924729 2      |  | 0.893728796345834    |
| 0.350546131422414             |  |                      |
| LBR 0.474441419518596 2       |  | 0.788817169155916    |
| 0.0828840740876563            |  |                      |
| SRP9 12.2592479772178 2       |  | 0.00217739953383678  |
| 0.259013211677378             |  |                      |
| TMEM63A 4.53569720462238 2    |  | 0.103534684930943    |
| 0.599129164203568             |  |                      |
| PYCR2 3.50815664366098 2      |  | 0.173066680586398    |
| 0.30580323145336              |  |                      |
| SDE2 7.48247398503483 2       |  | 0.0237247376496587   |
| 1.66561299127626              |  |                      |
| H3F3A 9.21712566502391 2      |  | 0.00996613101998611  |
| 0.0695016060958362            |  |                      |
| ACBD3 1.60296803672937 2      |  | 0.448662646218971    |
| 0.272433876078846             |  |                      |
| MIXL1 8.53678459835812 2      |  | 0.0140042797566503   |
| 0.925517433780208             |  |                      |
| LIN9 0.0642761252893638 2     |  | 0.968372876729153    |
| 0.131520846449202             |  |                      |
| PARP1 44.9154651523617 2      |  | 1.76494263648408e-10 |
| 0.355012033540167             |  |                      |
| ITPKB 4.51665959579161 2      |  | 0.104524916781796    |
| 0.462748624885084             |  |                      |
| ITPKB-AS1 0.457694432684617 2 |  | 0.795450055990598    |
| 0.216475629297106             |  |                      |
| PSEN2 1.48168141319148 2      |  | 0.476712971267191    |
| 0.778137837006484             |  |                      |
| COQ8A 0.414864572399302 2     |  | 0.812668268766934    |
| 0.221808328986367             |  |                      |
| ZNF678 1.92824034389533 2     |  | 0.381318546948245    |
| 1.01337517666897              |  |                      |
| SNAP47 0.539623639262205 2    |  | 0.763523160888894    |

|                             |   |                      |
|-----------------------------|---|----------------------|
| 0.160595615866566           |   |                      |
| JMJD4 1.7405420006407 2     |   | 0.418838028626338    |
| 0.358556038448924           |   |                      |
| ARF1 8.09432583663673 2     |   | 0.0174718735224193   |
| 0.158007200869604           |   |                      |
| C1orf35 0.0122517255517228  | 2 | 0.99389286206673     |
| 0.0227153298501018          |   |                      |
| MRPL55 6.92159524643181 2   |   | 0.0314047029057051   |
| 0.232567129496532           |   |                      |
| GUK1 15.3365406467862 2     |   | 0.000467425620048978 |
| 0.205024041501163           |   |                      |
| IBA57 0.104440091397248     | 2 | 0.94911999409078     |
| 0.161697915940733           |   |                      |
| TRIM11 0.89292875265725 2   |   | 0.639886554887583    |
| 0.280049963119307           |   |                      |
| HIST3H2A 0.0382841573781421 | 2 | 0.981039967468023    |
| 0.098885104878461           |   |                      |
| RNF187 0.0279528896168487   | 2 | 0.986120772252998    |
| 0.0275531284228767          |   |                      |
| RAB4A 11.9939565840234 2    |   | 0.00248625356972143  |
| 0.516564093319176           |   |                      |
| NUP133 0.893606985253013    | 2 | 0.6396695957173      |
| 0.331534586167931           |   |                      |
| ABCB10 3.90458086789336 2   |   | 0.141948575129586    |
| 2.37285907767758            |   |                      |
| TAF5L 5.18117699259949 2    |   | 0.0749759040575484   |
| 1.88014394727441            |   |                      |
| URB2 0.589054904986675      | 2 | 0.744883497151671    |
| 0.858496981208334           |   |                      |
| GALNT2 2.91061922616649 2   |   | 0.233328111280608    |
| 0.274353185499706           |   |                      |
| COG2 0.120849299428416      | 2 | 0.941364698445158    |
| 0.086617944227859           |   |                      |
| C1orf198 0.0823318095921394 | 2 | 0.959669902900364    |
| 0.278427749740193           |   |                      |
| TTC13 4.42913637426975 2    |   | 0.109200658318166    |
| 0.669939694353394           |   |                      |
| ARV1 7.86160730423904 2     |   | 0.019627892215783    |
| 0.855370611889043           |   |                      |
| FAM89A 0.28750991646578 2   |   | 0.866099952721549    |
| 0.33571226281797            |   |                      |
| C1orf131 0.0327429448770792 | 2 | 0.9837618117722      |
| 0.0296071903167202          |   |                      |
| GNPAT 0.920827072862857     | 2 | 0.631022640692163    |
| 0.156583073369995           |   |                      |
| EXOC8 0.26469285566157 2    |   | 0.876037458749172    |
| 0.294650484796232           |   |                      |
| SPRTN 2.15954054144655 2    |   | 0.339673549641279    |
| 0.509366066504056           |   |                      |
| EGLN1 0.201328385427135     | 2 | 0.904236631157157    |



|                    |                      |                      |
|--------------------|----------------------|----------------------|
| 0.11049358976783   |                      |                      |
| AL445524.1         | 5.60198439424394 2   | 0.0607497569785862   |
| 0.965600817276086  |                      |                      |
| TSNAX              | 1.55085739408649 2   | 0.460506320978528    |
| 0.22269728436506   |                      |                      |
| MAP10              | 5.05835106555073 2   | 0.0797247236186709   |
| 1.22500276418093   |                      |                      |
| NTPCR              | 0.507992265619338 2  | 0.775694801800113    |
| 0.169237359842261  |                      |                      |
| PCNX2              | 0.0824186933909479 2 | 0.959628213922512    |
| 0.213905386482062  |                      |                      |
| AL355472.1         | 0.557256184540066 2  | 0.756821318580113    |
| 0.442155049178703  |                      |                      |
| COA6               | 1.04904031705026 2   | 0.591839285278386    |
| 0.181216831770465  |                      |                      |
| TARBP1             | 2.7177337420855 2    | 0.256951771548177    |
| 0.591164582718548  |                      |                      |
| IRF2BP2            | 0.553148457176808 2  | 0.758377323764113    |
| 0.176463592276625  |                      |                      |
| TOMM20             | 3.40104695832384 2   | 0.182587918060723    |
| 0.223555133017408  |                      |                      |
| RBM34              | 0.9276476640186 2    | 0.628874332236576    |
| 0.352194075322264  |                      |                      |
| ARID4B             | 10.9456867855629 2   | 0.00419927497841299  |
| 0.263238299271935  |                      |                      |
| GGPS1              | 0.0704331997664215 2 | 0.965396288886477    |
| 0.0610095408153112 |                      |                      |
| TBCE               | 0.0245643305643806 2 | 0.987792952658322    |
| 0.067729728660828  |                      |                      |
| TBCE.1             | 0.0464265609615825 2 | 0.977054074986432    |
| 0.119009838156063  |                      |                      |
| B3GALNT2           | 0.0958100223499657 2 | 0.953224328436164    |
| 0.287881629661589  |                      |                      |
| LYST               | 0.0298277347160344 2 | 0.985196793551364    |
| 0.0725809916670937 |                      |                      |
| GPR137B            | 206.590743237355 2   | 0 2.3721241622984    |
| ER01B              | 5.77699375694449 2   | 0.0556598132282935   |
| 0.875216002096405  |                      |                      |
| LGALS8             | 17.6505266784928 2   | 0.00014697275342046  |
| 1.18181174940214   |                      |                      |
| HEATR1             | 0.573076758019592 2  | 0.750858260781549    |
| 0.363905783129035  |                      |                      |
| ACTN2              | 3.12989051713624 2   | 0.209099459263798    |
| 3.67007673231015   |                      |                      |
| MTR                | 1.85201294000381 2   | 0.396132522869086    |
| 0.605452809859912  |                      |                      |
| FH                 | 5.20266176530759 2   | 0.074174794546769    |
| 0.282796068965872  |                      |                      |
| KMO                | 20.7659843676726 2   | 3.09544996832667e-05 |
| 2.25904669582122   |                      |                      |

|            |                    |   |                    |
|------------|--------------------|---|--------------------|
| OPN3       | 1.08582641225729   | 2 | 0.581053057019359  |
|            | 0.427088364069496  |   |                    |
| CEP170     | 7.43699744476881   | 2 | 0.0242703770825026 |
|            | 0.781165434486907  |   |                    |
| SDCCAG8    | 7.29174343560248   | 2 | 0.026098649277796  |
|            | 0.5476313501083    |   |                    |
| ZBTB18     | 2.18175724098643   | 2 | 0.335921216742397  |
|            | 0.977376619425466  |   |                    |
| ADSS       | 1.50807823342201   | 2 | 0.470462457125019  |
|            | 0.278260842360357  |   |                    |
| DESI2      | 3.46676934768845   | 2 | 0.176685374406346  |
|            | 0.370644976285092  |   |                    |
| COX20      | 0.443625718104831  | 2 | 0.801065262420473  |
|            | 0.143584440254179  |   |                    |
| HNRNPU     | 1.24141756777402   | 2 | 0.537563286338091  |
|            | 0.0868998087376291 |   |                    |
| EFCAB2     | 0.796380060756664  | 2 | 0.67153440359939   |
|            | 0.427631579017356  |   |                    |
| SMYD3      | 6.304593927892     | 2 | 0.0427538100349534 |
|            | 0.652530501818845  |   |                    |
| TFB2M      | 0.601585503316798  | 2 | 0.740231168532727  |
|            | 0.217340361216701  |   |                    |
| CNST       | 0.597503235330911  | 2 | 0.741743622569027  |
|            | 0.290145597908812  |   |                    |
| SCCPDH     | 6.34943036781461   | 2 | 0.0418060094136772 |
|            | 0.637084098597807  |   |                    |
| AHCTF1     | 0.686701916130696  | 2 | 0.709389202004894  |
|            | 0.451332754087142  |   |                    |
| ZNF670     | 4.21966118114188   | 2 | 0.121258507027892  |
|            | 0.692722525014478  |   |                    |
| ZNF669     | 2.07513492783451   | 2 | 0.354315519811347  |
|            | 0.39722879290627   |   |                    |
| ZNF124     | 1.29757564137881   | 2 | 0.522678973547277  |
|            | 0.761083253943112  |   |                    |
| AL390728.6 | 1.69585314881564   | 2 | 0.428302064390842  |
|            | 0.763586353541926  |   |                    |
| ZNF496     | 3.1813783529913    | 2 | 0.203785119413309  |
|            | 2.4356029329166    |   |                    |
| SH3BP5L    | 1.54634417623175   | 2 | 0.461546677050476  |
|            | 0.414726028458268  |   |                    |
| ZNF672     | 2.86999166408542   | 2 | 0.238116356471422  |
|            | 0.435876047469446  |   |                    |
| ZNF692     | 0.0564269770919155 | 2 | 0.972180795180582  |
|            | 0.102916321423386  |   |                    |
| PGBD2      | 8.74245402965096   | 2 | 0.0126357268280085 |
|            | 1.38906764938356   |   |                    |
| SH3YL1     | 1.76761268102953   | 2 | 0.413207107606013  |
|            | 0.492889767758157  |   |                    |
| ACP1       | 1.5590334516073    | 2 | 0.458627600641831  |
|            | 0.130772460414183  |   |                    |

|             |                    |   |                      |
|-------------|--------------------|---|----------------------|
| TMEM18      | 1.10770445723708   | 2 | 0.574731543188853    |
|             | 0.188818785366249  |   |                      |
| PXDN        | 1.31775687724454   | 2 | 0.517431340181686    |
|             | 1.18742845063211   |   |                      |
| EIPR1       | 1.28022186738065   | 2 | 0.527233932792954    |
|             | 0.192606649664611  |   |                      |
| TRAPPC12    | 0.840753385226215  | 2 | 0.656799361742307    |
|             | 0.194751546621457  |   |                      |
| ADI1        | 19.7321068735919   | 2 | 5.19071798753545e-05 |
|             | 0.602626857972303  |   |                      |
| AC231981.1  | 2.60740064114376   | 2 | 0.271525201537919    |
|             | 1.54589219005794   |   |                      |
| RNASEH1     | 7.92046893336033   | 2 | 0.0190586451504429   |
|             | 0.364506550348409  |   |                      |
| RNASEH1-AS1 | 6.62010537171955   | 2 | 0.0365142499184105   |
|             | 0.853084817351843  |   |                      |
| RPS7        | 23.8941496524833   | 2 | 6.47815489718262e-06 |
|             | 0.188777484136941  |   |                      |
| LINC00487   | 7.89813573621767   | 2 | 0.0192726580644813   |
|             | 1.34837564183872   |   |                      |
| CMPK2       | 3.16295477805285   | 2 | 0.205671017533111    |
|             | 0.611877895319816  |   |                      |
| RSAD2       | 2.81265986582944   | 2 | 0.245040951625199    |
|             | 2.50978854292285   |   |                      |
| LINC01814   | 3.25273724155618   | 2 | 0.196642362129834    |
|             | 2.40558660715079   |   |                      |
| ID2         | 1.38698078235256   | 2 | 0.499828424136845    |
|             | 0.279902429842796  |   |                      |
| KIDINS220   | 0.0785989400115306 | 2 | 0.961462736777649    |
|             | 0.104627167793547  |   |                      |
| MBOAT2      | 8.59057820089118   | 2 | 0.0136326299281386   |
|             | 2.76468730037562   |   |                      |
| ITGB1BP1    | 1.5167408024728    | 2 | 0.468429156944228    |
|             | 0.139298325923598  |   |                      |
| CPSF3       | 1.40483832007341   | 2 | 0.495385436390463    |
|             | 0.208333109095011  |   |                      |
| IAH1        | 9.75155207264003   | 2 | 0.00762917140689523  |
|             | 0.368016240503607  |   |                      |
| ADAM17      | 1.63907205551526   | 2 | 0.440636049981599    |
|             | 0.152152759711114  |   |                      |
| YWHAQ       | 6.71128611643205   | 2 | 0.0348869286138436   |
|             | 0.236766957577329  |   |                      |
| TAF1B       | 3.06178721626507   | 2 | 0.216342255712671    |
|             | 0.284013794635257  |   |                      |
| AC010969.2  | 0.0105522480521086 | 2 | 0.994737770269566    |
|             | 0.0621824566922591 |   |                      |
| CYS1        | 3.51481328807683   | 2 | 0.172491616440202    |
|             | 1.08270101424996   |   |                      |
| RRM2        | 1.63988563355944   | 2 | 0.440456840526419    |
|             | 0.45905278098278   |   |                      |

|           |                      |   |                                  |
|-----------|----------------------|---|----------------------------------|
| HPCAL1    | 3.49510084045384     | 2 | 0.174200138373529                |
|           | 0.47788927428272     |   |                                  |
| ODC1      | 22.5023040046865     | 2 | 1.2992321844485e-05              |
|           | 0.614179697869775    |   |                                  |
| NOL10     | 0.901519055140791    | 2 | 0.637144039332544                |
|           | 0.131083883446614    |   |                                  |
| RN7SL832P | 3.32915096515036     | 2 | 0.189270989762822                |
|           | 2.17029750462012     |   |                                  |
| ATP6V1C2  | 7.62470935497421     | 2 | 0.0220960884908588               |
|           | 1.68445793253704     |   |                                  |
| PDIA6     | 58.7453703081758     | 2 | 1.7519319328585e-13              |
|           | 0.676692813580663    |   |                                  |
| PQLC3     | 7.30392862470277     | 2 | 0.0259401241943366               |
|           | 1.44495909741769     |   |                                  |
| ROCK2     | 5.21671231536192     | 2 | 0.073655522365637                |
|           | 0.41643463021469     |   |                                  |
| E2F6      | 0.68157952725533     | 2 | 0.711208414367053                |
|           | 0.174522366047054    |   |                                  |
| GREB1     | 2.86720928527626     | 2 | 0.238447851956641                |
|           | 2.44164750067237     |   |                                  |
| LPIN1     | 21.7319939031965     | 2 | 1.90966629736167e-05             |
|           | 1.12625598934199     |   |                                  |
| MIR3681HG | 29.7647266617973     | 2 | 3.44089743697928e-07             |
|           | 1.50874668577838     |   |                                  |
| TRIB2     | 8.79070135651682     | 2 | 0.0123345541069669               |
|           | 2.52373972242326     |   |                                  |
| NBAS      | 0.504743032112484    | 2 | 0.776956032801766                |
|           | 0.265731694977745    |   |                                  |
| DDX1      | 10.4613043245802     | 2 | 0.00535003507356002              |
|           | 0.452601921093564    |   |                                  |
| FAM49A    | 6.5537017825582      | 2 | 0.0377469390524068               |
|           | 0.557131585757956    |   |                                  |
| SMC6      | 0.715219094406617    | 2 | 0.699346083338719                |
|           | 0.0969431727741237   |   |                                  |
| GEN1      | 8.73465787460015     | 2 | 0.0126850779956217               |
|           | 0.992594953342086    |   |                                  |
| RDH14     | 0.335385658885444    | 2 | 0.845613542378392                |
|           | 0.0956405620792566   |   |                                  |
| LINC00954 | 3.16710989906863     | 2 | 0.205244167106794                |
|           | 0.362180468439533    |   |                                  |
| TTC32     | 0.122791584133403    | 2 | 0.940450943082437                |
|           | 0.137464072613512    |   |                                  |
| LAPTM4A   | 23.5782087227545     | 2 | 7.58677194001578e-06             |
|           | 0.640424241542901    |   |                                  |
| PUM2      | 0.000118526587628561 | 2 | 0.99994073846222                 |
|           | 0.00327791308830355  |   |                                  |
| RHOB      | 1.53943679102901     | 2 | 0.46314347322855 0.7498190974209 |
| HS1BP3    | 0.137148493981182    | 2 | 0.933724131323035                |
|           | 0.173935198640393    |   |                                  |
| LDAH      | 1.95775393842127     | 2 | 0.375732821530454                |

|                                |   |                                    |  |
|--------------------------------|---|------------------------------------|--|
| 0.499935657673177              |   |                                    |  |
| ATAD2B 3.01359437678609 2      |   | 0.221618645259013                  |  |
| 0.459323170327414              |   |                                    |  |
| UBXN2A 2.25970430092684 2      |   | 0.323081020270359                  |  |
| 0.396817277074512              |   |                                    |  |
| WDCP 3.17854843428798 2        |   | 0.204073671170113                  |  |
| 1.53460900329411               |   |                                    |  |
| FKBP1B 0.0615616651937115      | 2 | 0.969688073805555                  |  |
| 0.137254273980192              |   |                                    |  |
| SF3B6 0.205479482056253        | 2 | 0.90236179067545                   |  |
| 0.032905921641892              |   |                                    |  |
| FAM228B 0.000510393818328464   | 2 | 0.999744835650797                  |  |
| 0.0010600328698478             |   |                                    |  |
| TP53I3 0.432513005923066       | 2 | 0.805528654886252                  |  |
| 0.274129249617657              |   |                                    |  |
| ITSN2 12.4585014100034 2       |   | 0.0019709281501008                 |  |
| 0.240588996431828              |   |                                    |  |
| NCOA1 0.0150439176218679       | 2 | 0.992506260322528                  |  |
| 0.046736792937239              |   |                                    |  |
| PTRHD1 2.25973702683289 2      |   | 0.323075733754053                  |  |
| 0.166867011374301              |   |                                    |  |
| CENPO 0.179959682018183        | 2 | 0.913949609387388                  |  |
| 0.329374579968487              |   |                                    |  |
| ADCY3 3.92629664242346 2       |   | 0.140415650723736                  |  |
| 1.1937025611868                |   |                                    |  |
| DNAJC27 1.63081157922497 2     |   | 0.442459745358951                  |  |
| 1.1229058824284                |   |                                    |  |
| DNAJC27-AS1 0.0254815560923874 | 2 | 0.987340042065268                  |  |
| 0.165573778769277              |   |                                    |  |
| POMC 2.52450692784851 2        |   | 0.283015542055105                  |  |
| 0.432566387048714              |   |                                    |  |
| DTNB 0.931881804491483         | 2 | 0.627544369414429                  |  |
| 0.704574404312329              |   |                                    |  |
| ASXL2 0.0192621017550245       | 2 | 0.990415179159339                  |  |
| 0.0509575702885802             |   |                                    |  |
| RAB10 1.07695053777893 2       |   | 0.583637464496417                  |  |
| 0.14990546893417               |   |                                    |  |
| HADHA 9.92332885182764 2       |   | 0.00700126504238674                |  |
| 0.295195835335615              |   |                                    |  |
| HADHB 0.0618488902239541       | 2 | 0.969548824461606                  |  |
| 0.0344138441772141             |   |                                    |  |
| SELENOI 0.0660321302140878     | 2 | 0.967523016103357                  |  |
| 0.181310415249873              |   |                                    |  |
| SLC35F6 1.85847479599231 2     |   | 0.39485471257961 0.719871523362776 |  |
| TMEM214 1.55501251007964 2     |   | 0.459550585530582                  |  |
| 0.414921089734365              |   |                                    |  |
| AGBL5 4.56267253991585 2       |   | 0.102147618682501                  |  |
| 1.46464808188688               |   |                                    |  |
| OST4 13.4329264502477 2        |   | 0.00121081302306292                |  |
| 0.187160512947002              |   |                                    |  |

|            |                    |   |                    |
|------------|--------------------|---|--------------------|
| KHK        | 1.4824645985806    | 2 | 0.476526330496208  |
|            | 0.979449510189501  |   |                    |
| PREB       | 7.59105570810879   | 2 | 0.0224710412553994 |
|            | 0.317217673136013  |   |                    |
| SLC5A6     | 2.17902109885543   | 2 | 0.336381095340886  |
|            | 0.277510084157908  |   |                    |
| ATRAID     | 0.0325916407607098 | 2 | 0.983836238193245  |
|            | 0.023410921537572  |   |                    |
| CAD        | 2.88277940260681   | 2 | 0.236598728546826  |
|            | 0.93596112508559   |   |                    |
| UCN        | 0.929006958794589  | 2 | 0.628447064651391  |
|            | 1.01980828970682   |   |                    |
| MPV17      | 0.558908241840605  | 2 | 0.756196420615174  |
|            | 0.155564490387096  |   |                    |
| GTF3C2     | 4.43197796604073   | 2 | 0.109045616639505  |
|            | 0.676491810232299  |   |                    |
| AC074117.1 | 0.0689234040808275 | 2 | 0.966125339607188  |
|            | 0.138790824754134  |   |                    |
| EIF2B4     | 0.0287347307241328 | 2 | 0.985735352713869  |
|            | 0.0398246011003788 |   |                    |
| SNX17      | 0.123483530221464  | 2 | 0.940125628685148  |
|            | 0.0313674532491282 |   |                    |
| ZNF513     | 0.941392564543873  | 2 | 0.624567241751582  |
|            | 0.482844103243818  |   |                    |
| PPM1G      | 5.29371946600478   | 2 | 0.0708734254536585 |
|            | 0.232468633447146  |   |                    |
| NRBP1      | 1.73707974878481   | 2 | 0.419563717945873  |
|            | 0.221005868870968  |   |                    |
| KRTCAP3    | 0.0150363789794016 | 2 | 0.992510001404499  |
|            | 0.097973375154172  |   |                    |
| IFT172     | 3.91443919400488   | 2 | 0.141250609064695  |
|            | 2.2704933846067    |   |                    |
| ZNF512     | 0.0246586088946223 | 2 | 0.987746390020692  |
|            | 0.065465525082876  |   |                    |
| GPN1       | 6.92499608423575   | 2 | 0.0313513471317129 |
|            | 0.257940930099616  |   |                    |
| SUPT7L     | 0.188989907163457  | 2 | 0.909832326008919  |
|            | 0.115546139000195  |   |                    |
| SLC4A1AP   | 0.650359473995049  | 2 | 0.722397500414963  |
|            | 0.205654418708121  |   |                    |
| MRPL33     | 1.54030530514802   | 2 | 0.462942393569027  |
|            | 0.0670371094379    |   |                    |
| RBKS       | 2.40338002128051   | 2 | 0.300685620372894  |
|            | 0.920653120896137  |   |                    |
| BABAM2     | 0.0606261970509234 | 2 | 0.97014173604467   |
|            | 0.0563265782007021 |   |                    |
| PPP1CB     | 5.12005752944888   | 2 | 0.0773025168257242 |
|            | 0.31081111913529   |   |                    |
| TRMT61B    | 0.0304277549224378 | 2 | 0.984901268892065  |
|            | 0.0537995608197627 |   |                    |

|            |                      |   |                      |
|------------|----------------------|---|----------------------|
| WDR43      | 0.415208448010813    | 2 | 0.812528552379604    |
|            | 0.128278120160347    |   |                      |
| CLIP4      | 1.50099115279947e-06 | 2 | 0.999999249504705    |
|            | 0.000414833932332318 |   |                      |
| YPEL5      | 7.20049043900752     | 2 | 0.0273170229590892   |
|            | 0.268940334083293    |   |                      |
| LBH        | 9.72209787929603     | 2 | 0.00774235836363102  |
|            | 0.572203495431736    |   |                      |
| LCLAT1     | 0.00261226665127777  | 2 | 0.998694719295241    |
|            | 0.0386600301302354   |   |                      |
| GALNT14    | 8.02223715640029     | 2 | 0.0181131229563738   |
|            | 1.22740363815929     |   |                      |
| EHD3       | 5.57114968830074     | 2 | 0.0616936146223267   |
|            | 0.70132113357341     |   |                      |
| MEM01      | 0.364019379817279    | 2 | 0.83359326293404     |
|            | 0.206660291629204    |   |                      |
| DPY30      | 6.24270869112553     | 2 | 0.0440974048339881   |
|            | 0.295614932875518    |   |                      |
| SPAST      | 2.15168022404336     | 2 | 0.341011147362038    |
|            | 0.444231651698705    |   |                      |
| SLC30A6    | 0.0030913261416874   | 2 | 0.998455530851108    |
|            | 0.0249835342966792   |   |                      |
| YIPF4      | 1.63335375985572     | 2 | 0.441897696344883    |
|            | 0.183866686676008    |   |                      |
| AL133245.1 | 0.382923461213547    | 2 | 0.825751225500171    |
|            | 0.579521363927029    |   |                      |
| BIRC6      | 0.344286218142253    | 2 | 0.841858686932662    |
|            | 0.114880640188062    |   |                      |
| TTC27      | 2.74633910419039     | 2 | 0.253302829346231    |
|            | 0.581070348748433    |   |                      |
| LTBP1      | 19.0170503664891     | 2 | 7.42164166771531e-05 |
|            | 1.04953694045421     |   |                      |
| RASGRP3    | 0.199331181119518    | 2 | 0.905140054809911    |
|            | 0.0436915058702289   |   |                      |
| FAM98A     | 0.50380290710987     | 2 | 0.77732133654902     |
|            | 0.0775062535135817   |   |                      |
| FEZ2       | 1.89452935527547     | 2 | 0.387800332940345    |
|            | 0.225768925203104    |   |                      |
| STRN       | 0.709105500230859    | 2 | 0.701487113089292    |
|            | 0.213281108066759    |   |                      |
| HEATR5B    | 0.989744273482532    | 2 | 0.609648854002099    |
|            | 0.436926040996095    |   |                      |
| GPATCH11   | 1.32556158093098     | 2 | 0.515416075730487    |
|            | 0.322637469461907    |   |                      |
| EIF2AK2    | 0.371900587373485    | 2 | 0.830314865847037    |
|            | 0.131058666467671    |   |                      |
| CEBPZ0S    | 0.310052117083092    | 2 | 0.856392860843901    |
|            | 0.0970594685178      |   |                      |
| CEBPZ      | 0.611072585715135    | 2 | 0.736728166373886    |
|            | 0.0513028264285257   |   |                      |
| NDUFAF7    | 0.355604842101776    | 2 | 0.837107802030389    |

|                               |   |                                    |  |
|-------------------------------|---|------------------------------------|--|
| 0.201329576445466             |   |                                    |  |
| PRKD3 3.69186874361077 2      |   | 0.157877735445848                  |  |
| 0.270182356154446             |   |                                    |  |
| QPCT 12.4879716157209 2       |   | 0.00194209924116806                |  |
| 0.696284742278205             |   |                                    |  |
| CDC42EP3 8.06022755187691 2   |   | 0.0177723077776283                 |  |
| 0.597697023096096             |   |                                    |  |
| RMDN2 1.29861086662466 2      |   | 0.522408498319567                  |  |
| 0.554159236612054             |   |                                    |  |
| ATL2 4.60338438073706 2       |   | 0.100089330138174                  |  |
| 0.39708464044465              |   |                                    |  |
| HNRNPLL 22.1247170840292 2    |   | 1.56920154974483e-05               |  |
| 3.20346709254356              |   |                                    |  |
| GALM 1.0442410493944 2        |   | 0.593261188188895                  |  |
| 0.326672936924079             |   |                                    |  |
| SRSF7 2.2155265122851 2       |   | 0.330296925067584                  |  |
| 0.127794288099476             |   |                                    |  |
| GEMIN6 0.507007261962487      | 2 | 0.776076926999255                  |  |
| 0.156696460619266             |   |                                    |  |
| DHX57 1.01578734309182 2      |   | 0.601761752757449                  |  |
| 0.448560004749486             |   |                                    |  |
| MORN2 2.473125624902 2        |   | 0.290380597159998                  |  |
| 0.793552395864728             |   |                                    |  |
| SOS1 10.1943374399576 2       |   | 0.00611403262154619                |  |
| 0.985905714808433             |   |                                    |  |
| MAP4K3 0.0037401394755065     | 2 | 0.998131677753179                  |  |
| 0.0636774178940911            |   |                                    |  |
| AC007388.1 0.0676108024553183 | 2 | 0.966759616568271                  |  |
| 0.114107134063061             |   |                                    |  |
| THUMPD2 0.00328543254363954   | 2 | 0.998358632248042                  |  |
| 0.0163850782208327            |   |                                    |  |
| EML4 2.43305318695011 2       |   | 0.296257404285883                  |  |
| 0.485297007348359             |   |                                    |  |
| COX7A2L 5.9962163793851 2     |   | 0.0498813452058093                 |  |
| 0.202319655669298             |   |                                    |  |
| MTA3 4.48083641644302 2       |   | 0.10641399186587 0.350630758672129 |  |
| HAAO 1.37522499752634 2       |   | 0.502775013222127                  |  |
| 0.814985667570027             |   |                                    |  |
| ZFP36L2 20.4611808996864 2    |   | 3.60504774634673e-05               |  |
| 0.541289919498664             |   |                                    |  |
| AC010883.1 0.918136253067177  | 2 | 0.631872196170736                  |  |
| 0.784147155847349             |   |                                    |  |
| THADA 0.517602366798944       | 2 | 0.771976489528691                  |  |
| 0.342997716287486             |   |                                    |  |
| DYNC2LI1 2.3159248921745 2    |   | 0.314125577057934                  |  |
| 0.458016355273199             |   |                                    |  |
| LRPPRC 0.798927024459618      | 2 | 0.67067976102517                   |  |
| 0.246717504866547             |   |                                    |  |
| PPM1B 0.684426396045543       | 2 | 0.710196776019176                  |  |
| 0.158747927016546             |   |                                    |  |



|            |                     |   |                      |
|------------|---------------------|---|----------------------|
| PREPL      | 0.00594051137588715 | 2 | 0.99703415115725     |
|            | 0.027952445970478   |   |                      |
| CAMKMT     | 0.0425118712988855  | 2 | 0.978968379595998    |
|            | 0.0844189263958793  |   |                      |
| SRBD1      | 0.634621774249235   | 2 | 0.728104361664699    |
|            | 0.478763410036861   |   |                      |
| PRKCE      | 0.803384299725614   | 2 | 0.669186723208164    |
|            | 0.300201271246459   |   |                      |
| ATP6V1E2   | 0.107566345493395   | 2 | 0.947637557876065    |
|            | 0.161133012889947   |   |                      |
| RHOQ       | 3.34233234253185    | 2 | 0.188027665273969    |
|            | 0.361449233032494   |   |                      |
| PIGF       | 4.29343354530167    | 2 | 0.11686723025896     |
|            | 0.395422756352647   |   |                      |
| CRIPT      | 3.05483894545395    | 2 | 0.217095165100264    |
|            | 0.218964593120905   |   |                      |
| SOCS5      | 0.113583663131613   | 2 | 0.944790724502878    |
|            | 0.328604707389093   |   |                      |
| MCFD2      | 2.02742166804789    | 2 | 0.362869927991284    |
|            | 0.378134593864418   |   |                      |
| TTC7A      | 2.62390086714311    | 2 | 0.26929430317846     |
|            | 0.532564812208662   |   |                      |
| CALM2      | 19.2992367667912    | 2 | 6.44501575922662e-05 |
|            | 0.22455063468256    |   |                      |
| EPCAM      | 3.3504469383326     | 2 | 0.187266326555841    |
|            | 1.69573116030876    |   |                      |
| MSH2       | 1.21838768593212    | 2 | 0.543789071805877    |
|            | 0.308246891308076   |   |                      |
| KCNK12     | 7.98805396967545    | 2 | 0.0184253658517037   |
|            | 0.696393694387066   |   |                      |
| MSH6       | 0.0818971306768546  | 2 | 0.959878499703913    |
|            | 0.0523302889486256  |   |                      |
| FBX011     | 3.61558611049633    | 2 | 0.164015711281729    |
|            | 0.455118921850118   |   |                      |
| AC079807.1 | 1.47352750896354    | 2 | 0.478660474464253    |
|            | 1.62984320551207    |   |                      |
| FOXN2      | 0.118035497622736   | 2 | 0.942690037380963    |
|            | 0.136901155260334   |   |                      |
| AC093635.1 | 0.170475750804879   | 2 | 0.918293818906974    |
|            | 0.320701429097934   |   |                      |
| PPP1R21    | 6.54503927348504    | 2 | 0.0379107852270203   |
|            | 0.850250833501674   |   |                      |
| ASB3       | 0.257867723360234   | 2 | 0.879032101329365    |
|            | 0.201992344493657   |   |                      |
| CHAC2      | 0.527988433506905   | 2 | 0.767977981049871    |
|            | 0.132440680422938   |   |                      |
| ERLEC1     | 4.70581326982377    | 2 | 0.0950923613535409   |
|            | 0.442368420584569   |   |                      |
| PSME4      | 8.73202348540142    | 2 | 0.0127017977209987   |
|            | 0.94912899767113    |   |                      |
| ACYP2      | 8.47254370087155    | 2 | 0.0144614057511824   |
|            | 0.231435239250357   |   |                      |

|            |                     |   |                      |
|------------|---------------------|---|----------------------|
| SPTBN1     | 21.6988181436257    | 2 | 1.94160780083719e-05 |
|            | 1.83826973731614    |   |                      |
| EML6       | 0.282270796401745   | 2 | 0.868371727767893    |
|            | 0.133440358220926   |   |                      |
| RTN4       | 0.0895658931886114  | 2 | 0.956205006863559    |
|            | 0.0443826874409615  |   |                      |
| CLHC1      | 3.33310361760739    | 2 | 0.188897297931573    |
|            | 0.907236860541876   |   |                      |
| RPS27A     | 63.7155294636426    | 2 | 1.46549439250521e-14 |
|            | 0.264620479510922   |   |                      |
| MTIF2      | 7.28899287944576    | 2 | 0.0261345668707006   |
|            | 0.774657301775306   |   |                      |
| CCDC88A    | 8.64743038666511    | 2 | 0.0132505635771152   |
|            | 0.339911417324209   |   |                      |
| CFAP36     | 2.9936645739511     | 2 | 0.223838093135177    |
|            | 0.750957412525363   |   |                      |
| PPP4R3B    | 1.25778684671956    | 2 | 0.533181480855463    |
|            | 0.210782854940829   |   |                      |
| AC015982.1 | 6.16387819264697    | 2 | 0.0458702235731987   |
|            | 1.80578095727248    |   |                      |
| PNPT1      | 1.6021169498662     | 2 | 0.448853612290366    |
|            | 0.395450358757522   |   |                      |
| CCDC85A    | 3.29629315014727    | 2 | 0.192406188775768    |
|            | 1.17038235557226    |   |                      |
| VRK2       | 2.39124093020765    | 2 | 0.302516195196756    |
|            | 0.394068800306308   |   |                      |
| FANCL      | 1.61739403037372    | 2 | 0.445438087324515    |
|            | 0.341772342590118   |   |                      |
| AC007381.1 | 2.3736412523645     | 2 | 0.30519003641714     |
|            | 0.69623322472806    |   |                      |
| BCL11A     | 19.9276129808706    | 2 | 4.7073210853843e-05  |
|            | 0.361707244247937   |   |                      |
| PAPOLG     | 0.740350067670877   | 2 | 0.690613439338537    |
|            | 0.459142728082506   |   |                      |
| REL        | 11.612505317171     | 2 | 0.00300868353829342  |
|            | 0.364401991088051   |   |                      |
| PUS10      | 5.45156705524053    | 2 | 0.0654948655724535   |
|            | 0.641771230497421   |   |                      |
| PEX13      | 3.56144642232858    | 2 | 0.168516230368911    |
|            | 0.528530247150156   |   |                      |
| KIAA1841   | 0.00365504060809013 | 2 | 0.998174148594382    |
|            | 0.048108316088975   |   |                      |
| C2orf74    | 0.00492092021390589 | 2 | 0.997542564343994    |
|            | 0.0187397236523586  |   |                      |
| USP34      | 15.0666861172665    | 2 | 0.000534946905187517 |
|            | 0.436208635435677   |   |                      |
| AC016727.1 | 1.80501160424618    | 2 | 0.405552151992989    |
|            | 0.741444539258289   |   |                      |
| XP01       | 3.22566908380787    | 2 | 0.199321826510077    |
|            | 0.455742811062688   |   |                      |

|            |                      |   |                      |
|------------|----------------------|---|----------------------|
| CCT4       | 3.5911131687484      | 2 | 0.166035014129951    |
|            | 0.173547211144737    |   |                      |
| COMMD1     | 2.04256601556512     | 2 | 0.360132590720881    |
|            | 0.227319799105509    |   |                      |
| B3GNT2     | 0.000687616532661139 | 2 | 0.999656250828959    |
|            | 0.00854530895119502  |   |                      |
| EHBP1      | 0.359374208018094    | 2 | 0.835531605004156    |
|            | 0.217718577895837    |   |                      |
| WDPCP      | 0.654572876558495    | 2 | 0.720877226618576    |
|            | 0.508771749051663    |   |                      |
| MDH1       | 12.1828043893781     | 2 | 0.00226223459649166  |
|            | 0.297620697512478    |   |                      |
| UGP2       | 14.6048612904903     | 2 | 0.000673898774020021 |
|            | 0.277632360046979    |   |                      |
| VPS54      | 1.19993130166155     | 2 | 0.548830487641552    |
|            | 0.326392291959808    |   |                      |
| PELI1      | 1.93751182488112     | 2 | 0.379554944080409    |
|            | 0.32746820390841     |   |                      |
| AC012368.1 | 3.64622721458845     | 2 | 0.161522050942833    |
|            | 0.444304952595038    |   |                      |
| LGALSL     | 0.287994646996606    | 2 | 0.865890065612333    |
|            | 0.5345876310084      |   |                      |
| AC008074.3 | 1.5631757303401      | 2 | 0.457678701953539    |
|            | 0.347489157280383    |   |                      |
| AFTPH      | 4.07948941153441     | 2 | 0.130061910696092    |
|            | 0.346160920682792    |   |                      |
| SERTAD2    | 0.319267012261736    | 2 | 0.852456151676499    |
|            | 0.189266161389563    |   |                      |
| LINC02245  | 1.19379535858562     | 2 | 0.550516869519858    |
|            | 0.404598667044457    |   |                      |
| SLC1A4     | 3.86803716688548     | 2 | 0.144566078768167    |
|            | 0.38296707566282     |   |                      |
| LINC02576  | 2.5522720654177      | 2 | 0.279113705746038    |
|            | 0.517153633113746    |   |                      |
| CEP68      | 0.0675266348449707   | 2 | 0.966800302347724    |
|            | 0.110641122538304    |   |                      |
| RAB1A      | 0.0887330979243642   | 2 | 0.956603251272502    |
|            | 0.0377929668249515   |   |                      |
| ACTR2      | 6.95794224595457     | 2 | 0.0308391243818625   |
|            | 0.215217442070042    |   |                      |
| SPRED2     | 9.51232474401074     | 2 | 0.00859854417520522  |
|            | 0.657489594765053    |   |                      |
| AC007389.5 | 0.793401745121324    | 2 | 0.672535169270416    |
|            | 1.16448063098414     |   |                      |
| ETAA1      | 2.90868474534045     | 2 | 0.233553904840057    |
|            | 0.329223844907536    |   |                      |
| C1D        | 2.815369406379       | 2 | 0.244709202200704    |
|            | 0.142487724379801    |   |                      |
| WDR92      | 2.95402074023965     | 2 | 0.228319259133348    |
|            | 0.535429553964951    |   |                      |

|            |                     |   |                      |                   |
|------------|---------------------|---|----------------------|-------------------|
| PN01       | 1.45175085060951    | 2 | 0.48390076450362     | 0.210141912375312 |
| PPP3R1     | 4.48747156358395    | 2 | 0.106061540583722    |                   |
|            | 0.680808853962236   |   |                      |                   |
| AC017083.1 | 0.120453584216445   | 2 | 0.941550973038066    |                   |
|            | 0.284724382854925   |   |                      |                   |
| PLEK       | 36.9306258654473    | 2 | 9.56349177627658e-09 |                   |
|            | 1.32880938899606    |   |                      |                   |
| FBX048     | 0.138680080821461   | 2 | 0.933009365243553    |                   |
|            | 0.230856173685228   |   |                      |                   |
| APLF       | 3.2587759604556     | 2 | 0.196049523602215    |                   |
|            | 0.977702274040526   |   |                      |                   |
| ARHGAP25   | 2.83186844982882    | 2 | 0.242698772265151    |                   |
|            | 0.279561954246068   |   |                      |                   |
| GFPT1      | 1.69762966211331    | 2 | 0.427921791149558    |                   |
|            | 0.345544690543448   |   |                      |                   |
| NFU1       | 0.888280509152509   | 2 | 0.641375458675489    |                   |
|            | 0.136163947530451   |   |                      |                   |
| AAK1       | 1.38049363635335    | 2 | 0.501452286251778    |                   |
|            | 0.710941614384744   |   |                      |                   |
| ANXA4      | 0.0703845039569606  | 2 | 0.965419794549502    |                   |
|            | 0.122634755580925   |   |                      |                   |
| GMCL1      | 0.0400070496028646  | 2 | 0.980195218307157    |                   |
|            | 0.0447071175022758  |   |                      |                   |
| SNRNP27    | 1.06799018954191    | 2 | 0.586258128090564    |                   |
|            | 0.130339566701387   |   |                      |                   |
| MXD1       | 1.35824318481169    | 2 | 0.507062204089064    |                   |
|            | 1.06233404957758    |   |                      |                   |
| PCBP1      | 0.561737745427735   | 2 | 0.755127346788193    |                   |
|            | 0.0598929367003341  |   |                      |                   |
| LINC01816  | 3.44434940450037    | 2 | 0.178677155481361    |                   |
|            | 1.876241673054      |   |                      |                   |
| C2orf42    | 0.0304093673098402  | 2 | 0.98491032392518     |                   |
|            | 0.0694969289902705  |   |                      |                   |
| TIA1       | 0.777463742900732   | 2 | 0.677916014285152    |                   |
|            | 0.181383880558378   |   |                      |                   |
| PCY0X1     | 0.494368688175438   | 2 | 0.780996708134683    |                   |
|            | 0.351982847994329   |   |                      |                   |
| SNRPG      | 4.86598461031937    | 2 | 0.0877737932572278   |                   |
|            | 0.134033742093735   |   |                      |                   |
| FAM136A    | 0.00117621039925762 | 2 | 0.999412067700338    |                   |
|            | 0.00660126556152945 |   |                      |                   |
| TEX261     | 0.736226323821485   | 2 | 0.69203886481732     |                   |
|            | 0.341994428097735   |   |                      |                   |
| NAGK       | 6.58912498488164    | 2 | 0.0370842661452795   |                   |
|            | 0.371863791655542   |   |                      |                   |
| MCEE       | 2.24173963678536    | 2 | 0.325996113849779    |                   |
|            | 0.5018517143855     |   |                      |                   |
| MPHOSPH10  | 3.74040476130928    | 2 | 0.154092473323638    |                   |
|            | 0.381299023438135   |   |                      |                   |
| PAIP2B     | 1.43652120064418    | 2 | 0.487599649441536    |                   |

|                           |   |                                   |
|---------------------------|---|-----------------------------------|
| 0.657969449362361         |   |                                   |
| ZNF638 1.24572696119952 2 |   | 0.536406247473693                 |
| 0.115186033024291         |   |                                   |
| SFXN5 0.226626256119582   | 2 | 0.892871033364488                 |
| 0.23498584101682          |   |                                   |
| SMYD5 4.05352442324198 2  |   | 0.131761446929299                 |
| 1.01021583356704          |   |                                   |
| PRADC1 0.0572426771456105 | 2 | 0.971784372063252                 |
| 0.0786547031931389        |   |                                   |
| CCT7 0.529953690437005    | 2 | 0.767223714667659                 |
| 0.051422742471857         |   |                                   |
| ALMS1 1.23977434338719 2  |   | 0.538005136378716                 |
| 1.330945693636            |   |                                   |
| TPRKB 0.148611982119741   | 2 | 0.928387572076994                 |
| 0.0580264370141913        |   |                                   |
| DUSP11 0.0817087122540682 | 2 | 0.959968933360178                 |
| 0.0440105823703562        |   |                                   |
| STAMPB 1.09256560696324 2 |   | 0.579098437166855                 |
| 0.223037618024526         |   |                                   |
| DGUOK 0.292889205463109   | 2 | 0.86377358170637                  |
| 0.047562164023527         |   |                                   |
| BOLA3 13.519463309936 2   |   | 0.00115954028903564               |
| 0.87839006360448          |   |                                   |
| MOB1A 4.35047957903198 2  |   | 0.1135809148925 0.096167701866979 |
| MTHFD2 0.0758516815216069 | 2 | 0.962784337597791                 |
| 0.0331764278243191        |   |                                   |
| DCTN1 4.9841451645895 2   |   | 0.0827383067973473                |
| 0.375796509446813         |   |                                   |
| C2orf81 0.297520580184816 | 2 | 0.861775666307095                 |
| 0.715525247677787         |   |                                   |
| WDR54 1.58458906796033 2  |   | 0.452804626785204                 |
| 0.195834151471411         |   |                                   |
| RTKN 4.0223720218942 2    |   | 0.133829856832323                 |
| 1.10989718703902          |   |                                   |
| IN080B 0.0356988841508288 | 2 | 0.98230891561716                  |
| 0.0694948685162178        |   |                                   |
| WBP1 4.25857881877322 2   |   | 0.118921768527843                 |
| 1.93754982298981          |   |                                   |
| MOGS 0.110720542293831    | 2 | 0.946144218080978                 |
| 0.131644499141928         |   |                                   |
| MRPL53 0.730386673142593  | 2 | 0.694062450251055                 |
| 0.222772064795392         |   |                                   |
| CCDC142 0.755776749013158 | 2 | 0.685306994127845                 |
| 0.420307906672412         |   |                                   |
| TTC31 0.399098218275244   | 2 | 0.819099994530835                 |
| 0.296624379308673         |   |                                   |
| PCGF1 0.702400374992572   | 2 | 0.703842839215656                 |
| 0.303808135880385         |   |                                   |
| AUP1 1.79250038518226 2   |   | 0.408097079638381                 |
| 0.183234063948383         |   |                                   |

|          |                    |   |                      |                   |
|----------|--------------------|---|----------------------|-------------------|
| HTRA2    | 2.62880564400125   | 2 | 0.26863469807987     | 0.366819692348959 |
| DOK1     | 2.72454433888425   | 2 | 0.256078262215878    |                   |
|          | 0.367973748025731  |   |                      |                   |
| SEMA4F   | 1.60941576710987   | 2 | 0.447218547372409    |                   |
|          | 1.57536666373111   |   |                      |                   |
| POLE4    | 0.296703903130458  | 2 | 0.862127634369603    |                   |
|          | 0.0608840926578963 |   |                      |                   |
| MRPL19   | 0.0876723957348214 | 2 | 0.957110721410854    |                   |
|          | 0.0436074450653518 |   |                      |                   |
| GCFC2    | 0.0118435019609176 | 2 | 0.994095748028249    |                   |
|          | 0.0480254174966717 |   |                      |                   |
| SUCLG1   | 0.399296396703881  | 2 | 0.819018834577033    |                   |
|          | 0.0748766827005125 |   |                      |                   |
| TRABD2A  | 0.707140987004433  | 2 | 0.702176491963259    |                   |
|          | 0.546588792777361  |   |                      |                   |
| TMSB10   | 56.4372898771545   | 2 | 5.55666623824891e-13 |                   |
|          | 0.215358561884377  |   |                      |                   |
| KCMF1    | 0.60560725447497   | 2 | 0.738744151357386    |                   |
|          | 0.216097970173036  |   |                      |                   |
| TGOLN2   | 4.12887949095873   | 2 | 0.12688936099549     | 0.197488908048683 |
| RETSAT   | 11.9390308038044   | 2 | 0.00255547949948742  |                   |
|          | 1.45282642277428   |   |                      |                   |
| ELMOD3   | 2.51179238692242   | 2 | 0.284820479560281    |                   |
|          | 0.580444932066307  |   |                      |                   |
| CAPG     | 0.27920900448758   | 2 | 0.869702132631058    |                   |
|          | 0.0521065435009842 |   |                      |                   |
| MAT2A    | 0.426888595878312  | 2 | 0.807797154863672    |                   |
|          | 0.155165929108627  |   |                      |                   |
| GGCX     | 2.43451573772503   | 2 | 0.296040837732323    |                   |
|          | 0.42038553326222   |   |                      |                   |
| VAMP8    | 2.69080554467925   | 2 | 0.260434790802538    |                   |
|          | 0.103498950091351  |   |                      |                   |
| VAMP5    | 1.28949476291705   | 2 | 0.524795098335121    |                   |
|          | 0.492193286597356  |   |                      |                   |
| RNF181   | 0.0816811403112941 | 2 | 0.959982167555649    |                   |
|          | 0.0264850601269896 |   |                      |                   |
| TMEM150A | 1.6139134585104    | 2 | 0.446213951878579    |                   |
|          | 1.22634390997772   |   |                      |                   |
| USP39    | 0.235288400282241  | 2 | 0.889012306802986    |                   |
|          | 0.0719281319817229 |   |                      |                   |
| C2orf68  | 1.52215418260668   | 2 | 0.467162978747057    |                   |
|          | 0.337670599856594  |   |                      |                   |
| ST3GAL5  | 0.729116233808626  | 2 | 0.69450347242772     |                   |
|          | 0.174853674992556  |   |                      |                   |
| POLR1A   | 2.69393302671137   | 2 | 0.260027856491011    |                   |
|          | 1.27333098688834   |   |                      |                   |
| PTCD3    | 0.675091062590905  | 2 | 0.713519486500342    |                   |
|          | 0.18198273143154   |   |                      |                   |
| IMMT     | 1.4159849397744    | 2 | 0.492632179362047    |                   |
|          | 0.109695824933745  |   |                      |                   |

|            |                      |   |                      |
|------------|----------------------|---|----------------------|
| MRPL35     | 0.247370000838611    | 2 | 0.883658148993391    |
|            | 0.0309047272510415   |   |                      |
| KDM3A      | 3.14322646735194     | 2 | 0.207709827438374    |
|            | 0.501464267325595    |   |                      |
| CHMP3      | 0.116519599088763    | 2 | 0.943404819453847    |
|            | 0.0139047525723989   |   |                      |
| RNF103     | 1.90725054106135     | 2 | 0.385341520939537    |
|            | 0.405742732248045    |   |                      |
| RMND5A     | 2.7930605443389      | 2 | 0.247454074400433    |
|            | 0.435052357481013    |   |                      |
| PLGLB1     | 1.42792127338917     | 2 | 0.489700824449467    |
|            | 1.32029440438555     |   |                      |
| CYT0R      | 15.6540840989566     | 2 | 0.000398803378009127 |
|            | 0.698098159595305    |   |                      |
| KRCC1      | 6.87442990979021     | 2 | 0.0321541113927827   |
|            | 0.371677026892637    |   |                      |
| THNSL2     | 0.903108347956883    | 2 | 0.636637936223422    |
|            | 0.8669986443034      |   |                      |
| EIF2AK3    | 0.186744450421594    | 2 | 0.910854394219247    |
|            | 0.133049421994872    |   |                      |
| AC062029.1 | 9.23152025340286     | 2 | 0.00989465935293676  |
|            | 1.59395917033062     |   |                      |
| RPIA       | 45.3613954771884     | 2 | 1.41220590776925e-10 |
|            | 0.787135249464887    |   |                      |
| IGKC       | 14.8949299254605     | 2 | 0.000582917458222809 |
|            | 0.349353815511611    |   |                      |
| IGKV4-1    | 0.999070642118265    | 2 | 0.606812567230363    |
|            | 0.568211936628946    |   |                      |
| IGKV1-5    | 1.30815800796455     | 2 | 0.5199206870299      |
|            | 1.00167933181278     |   |                      |
| IGKV3-11   | 1.51593344938667     | 2 | 0.46861828897849     |
|            | 1.37085313686609     |   |                      |
| IGKV3-20   | 0.315145500641042    | 2 | 0.854214666957098    |
|            | 0.252058594400701    |   |                      |
| IGKV1-39   | 0.000732213493351902 | 2 | 0.999633960262221    |
|            | 0.0256914930611643   |   |                      |
| MRPS5      | 2.22000515572729     | 2 | 0.329558111518219    |
|            | 0.189632782230518    |   |                      |
| ZNF514     | 1.12410621104124     | 2 | 0.570037514435213    |
|            | 0.668831554458934    |   |                      |
| ZNF2       | 3.82913404269815     | 2 | 0.147405642267178    |
|            | 0.865723708628442    |   |                      |
| FAHD2A     | 1.38305197254278     | 2 | 0.500811254567231    |
|            | 0.447256230511592    |   |                      |
| LINC00342  | 0.806357735305917    | 2 | 0.668192570597141    |
|            | 0.465071095474379    |   |                      |
| ANKRD36C   | 4.46139248012559     | 2 | 0.107453590591013    |
|            | 0.888898121050142    |   |                      |
| GPAT2      | 1.46785037089979     | 2 | 0.480021115486973    |
|            | 1.34328701073281     |   |                      |
| DUSP2      | 49.6326967085305     | 2 | 1.66877622831407e-11 |
|            | 1.17701931720497     |   |                      |

|            |                      |   |                     |
|------------|----------------------|---|---------------------|
| STARD7     | 3.04201237024918     | 2 | 0.218491932980757   |
|            | 0.233216099626204    |   |                     |
| TMEM127    | 0.253800300763979    | 2 | 0.880821617908515   |
|            | 0.0893434175998921   |   |                     |
| CIA01      | 0.012307749687012    | 2 | 0.993865021462585   |
|            | 0.0201953152379688   |   |                     |
| SNRNP200   | 0.210299571651537    | 2 | 0.900189676833434   |
|            | 0.0866234709170928   |   |                     |
| ITPRIPL1   | 3.67616388710374     | 2 | 0.159122339221944   |
|            | 1.48416261550607     |   |                     |
| NCAPH      | 1.91948326027926     | 2 | 0.382991826737704   |
|            | 1.47099286438848     |   |                     |
| ARID5A     | 9.51677425687731     | 2 | 0.00857943577238707 |
|            | 0.520430582354364    |   |                     |
| KANSL3     | 0.00019375385734231  | 2 | 0.999903127763747   |
|            | 0.00901707492900102  |   |                     |
| LMAN2L     | 0.610115291831628    | 2 | 0.737080883464369   |
|            | 0.344190449361654    |   |                     |
| CNNM3      | 0.448822068425997    | 2 | 0.798986656014718   |
|            | 0.532238343719734    |   |                     |
| ANKRD39    | 0.931814421134696    | 2 | 0.627565512793677   |
|            | 0.209642349970899    |   |                     |
| FAHD2B     | 0.00053012426421176  | 2 | 0.999734972993757   |
|            | 0.00947958510213532  |   |                     |
| ANKRD36    | 0.0152055143045974   | 2 | 0.992426070702537   |
|            | 0.0423692661010035   |   |                     |
| AC092683.1 | 0.000986290683313532 | 2 | 0.999506976234521   |
|            | 0.0319662456980322   |   |                     |
| ANKRD36B   | 0.0446917684556224   | 2 | 0.977901935692474   |
|            | 0.116497996012571    |   |                     |
| COX5B      | 0.535673811111896    | 2 | 0.765032543485923   |
|            | 0.0474313832418592   |   |                     |
| ACTR1B     | 0.761578941204679    | 2 | 0.683321733790678   |
|            | 0.0753237479218443   |   |                     |
| ZAP70      | 0.647965474846788    | 2 | 0.723262727650321   |
|            | 0.459274125603731    |   |                     |
| TMEM131    | 0.0553218628755058   | 2 | 0.972718129029567   |
|            | 0.0556455793800309   |   |                     |
| INPP4A     | 0.0314938487596873   | 2 | 0.984376410205114   |
|            | 0.146798574762331    |   |                     |
| COA5       | 1.88408636664807     | 2 | 0.389830525881497   |
|            | 0.280179439629215    |   |                     |
| UNC50      | 0.0169614147451692   | 2 | 0.991555152382554   |
|            | 0.0262498494788974   |   |                     |
| MGAT4A     | 5.68484425270187     | 2 | 0.0582843228639229  |
|            | 0.715703572713345    |   |                     |
| TSGA10     | 3.63818694226095     | 2 | 0.162172698550774   |
|            | 0.656550438020522    |   |                     |
| C2orf15    | 0.025272531514092    | 2 | 0.987443236625687   |
|            | 0.0171229768015527   |   |                     |



|            |                     |   |                      |                   |
|------------|---------------------|---|----------------------|-------------------|
| LIPT1      | 1.4281463905368     | 2 | 0.48964570752507     | 0.504767539266829 |
| MITD1      | 3.17978959168647    | 2 | 0.203947066684794    |                   |
|            | 0.225693533647692   |   |                      |                   |
| MRPL30     | 1.09408063551028    | 2 | 0.578659927944395    |                   |
|            | 0.196277962314272   |   |                      |                   |
| LYG2       | 0.09327368560281    | 2 | 0.954433944218538    |                   |
|            | 0.306498673476622   |   |                      |                   |
| TXNDC9     | 0.495006405316738   | 2 | 0.780747720338701    |                   |
|            | 0.0881149814539618  |   |                      |                   |
| EIF5B      | 2.89265708378789    | 2 | 0.235433085973412    |                   |
|            | 0.0926726469143933  |   |                      |                   |
| REV1       | 0.0939986288670759  | 2 | 0.954088051680917    |                   |
|            | 0.074261205554686   |   |                      |                   |
| AFF3       | 51.1290195805479    | 2 | 7.89723841876366e-12 |                   |
|            | 1.13178182862643    |   |                      |                   |
| CHST10     | 2.3580955405353     | 2 | 0.307571477907562    |                   |
|            | 0.730557986386604   |   |                      |                   |
| PDCL3      | 0.114483590454575   | 2 | 0.944365698639415    |                   |
|            | 0.0583927438877417  |   |                      |                   |
| RPL31      | 78.6972870010307    | 2 | 0.250247701626962    |                   |
| CNOT11     | 0.0259018258342484  | 2 | 0.987132589290258    |                   |
|            | 0.0363329760946024  |   |                      |                   |
| RNF149     | 3.20453878033278    | 2 | 0.201438855525862    |                   |
|            | 0.553128059204649   |   |                      |                   |
| MAP4K4     | 5.11290057269077    | 2 | 0.0775796377507277   |                   |
|            | 0.218891756829377   |   |                      |                   |
| MFSD9      | 0.0160321703540138  | 2 | 0.992015957956449    |                   |
|            | 0.0625631970230719  |   |                      |                   |
| TMEM182    | 4.1531930192391     | 2 | 0.125356135375597    |                   |
|            | 2.48527283906132    |   |                      |                   |
| LINC01102  | 3.25759406149732    | 2 | 0.196165413205151    |                   |
|            | 1.2877013256944     |   |                      |                   |
| MRPS9      | 1.01950838826323    | 2 | 0.600643202292094    |                   |
|            | 0.169244893057298   |   |                      |                   |
| TGFBRAP1   | 3.06611713756481    | 2 | 0.21587438988045     | 0.67760647312875  |
| AC012360.3 | 0.13607107543702    | 2 | 0.934227272681434    |                   |
|            | 0.070953694650082   |   |                      |                   |
| C2orf49    | 0.334684655210567   | 2 | 0.84590998342729     |                   |
|            | 0.130702735193485   |   |                      |                   |
| NCK2       | 0.631489134671862   | 2 | 0.72924569955132     |                   |
|            | 0.304920489845306   |   |                      |                   |
| UXS1       | 0.00010527630688562 | 2 | 0.99994736323192     |                   |
|            | 0.00196540831672723 |   |                      |                   |
| GCC2       | 2.30765215094174    | 2 | 0.315427607849252    |                   |
|            | 0.200208077583792   |   |                      |                   |
| LIMS1      | 32.4131540318528    | 2 | 9.15320167438338e-08 |                   |
|            | 0.816728068541753   |   |                      |                   |
| RANBP2     | 18.9417975346506    | 2 | 7.70621154371209e-05 |                   |
|            | 0.877969999704486   |   |                      |                   |
| CCDC138    | 7.20544564674876    | 2 | 0.0272494259711304   |                   |

|                     |                      |   |                                   |
|---------------------|----------------------|---|-----------------------------------|
| 0.751466933034486   |                      |   |                                   |
| RGPD5               | 0.93042719950877     | 2 | 0.628000950013718                 |
| 0.951289133233751   |                      |   |                                   |
| SMIM37              | 1.94162867595399     | 2 | 0.37877446204869 0.24686188578206 |
| BUB1                | 4.20861026455039     | 2 | 0.121930370318404                 |
| 0.655266054899765   |                      |   |                                   |
| MIR4435-2HG         | 0.000349417470057213 | 2 | 0.999825306525654                 |
| 0.00769570222182683 |                      |   |                                   |
| BCL2L11             | 4.87574660517734     | 2 | 0.0873464134663331                |
| 0.49916303919768    |                      |   |                                   |
| ANAPC1              | 0.154764439588243    | 2 | 0.925536027801192                 |
| 0.191558134003933   |                      |   |                                   |
| TMEM87B             | 0.000500834424163623 | 2 | 0.999749614139691                 |
| 0.0103935321155765  |                      |   |                                   |
| ZC3H8               | 0.281021281275836    | 2 | 0.868914419079871                 |
| 0.124131218225379   |                      |   |                                   |
| ZC3H6               | 0.70010987330221     | 2 | 0.704649377578358                 |
| 0.287297154468911   |                      |   |                                   |
| TTL                 | 0.00971346024435846  | 2 | 0.995155044721435                 |
| 0.0940934026257392  |                      |   |                                   |
| POLR1B              | 2.40278888466877     | 2 | 0.300774506647643                 |
| 0.999082798092891   |                      |   |                                   |
| CHCHD5              | 0.00342023419994002  | 2 | 0.998291344317094                 |
| 0.00868854131029325 |                      |   |                                   |
| SLC20A1             | 0.788304158377493    | 2 | 0.674251508820505                 |
| 0.442593571611604   |                      |   |                                   |
| PSD4                | 0.129292056431084    | 2 | 0.937399217531914                 |
| 0.114628884538511   |                      |   |                                   |
| AC016745.1          | 3.37809709855095     | 2 | 0.184695168773208                 |
| 2.86437279576439    |                      |   |                                   |
| AC016745.2          | 0.966312453601102    | 2 | 0.616833449929331                 |
| 0.439172700860529   |                      |   |                                   |
| CBWD2               | 0.733079534823008    | 2 | 0.693128572005326                 |
| 0.253761164239652   |                      |   |                                   |
| RABL2A              | 0.429476921046583    | 2 | 0.806752410190826                 |
| 0.340423449531611   |                      |   |                                   |
| SLC35F5             | 0.0203786741086594   | 2 | 0.989862398374797                 |
| 0.0453084733851849  |                      |   |                                   |
| AC104653.1          | 0.861166800386469    | 2 | 0.650129698272496                 |
| 0.285213126267208   |                      |   |                                   |
| AC110769.2          | 2.00734729753201     | 2 | 0.366530460673733                 |
| 0.642482958403882   |                      |   |                                   |
| ACTR3               | 9.21960718002875     | 2 | 0.00995377313630685               |
| 0.196705667004415   |                      |   |                                   |
| DDX18               | 1.02364345462492     | 2 | 0.599402635439991                 |
| 0.0482333522130769  |                      |   |                                   |
| CCDC93              | 0.000333740827589354 | 2 | 0.999833143508298                 |
| 0.00360057566306152 |                      |   |                                   |
| INSIG2              | 4.24330103044147     | 2 | 0.119833677886826                 |
| 0.589995335485551   |                      |   |                                   |

|            |                     |   |                      |
|------------|---------------------|---|----------------------|
| C2orf76    | 1.12936486007825    | 2 | 0.568540669529896    |
|            | 0.337756470388827   |   |                      |
| DBI        | 9.6407444405399     | 2 | 0.00806378507616212  |
|            | 0.125408456947784   |   |                      |
| TMEM177    | 0.142486253106334   | 2 | 0.931235456535721    |
|            | 0.196333590345871   |   |                      |
| PTPN4      | 2.51273885346033    | 2 | 0.284685724921378    |
|            | 0.556268294636806   |   |                      |
| EPB41L5    | 0.0545497158301323  | 2 | 0.973093742246716    |
|            | 0.188057959343997   |   |                      |
| TMEM185B   | 1.86566851702086    | 2 | 0.393437026393222    |
|            | 0.706724445324184   |   |                      |
| RALB       | 0.0568665953823907  | 2 | 0.97196712443523     |
|            | 0.0625286565942223  |   |                      |
| CLASP1     | 0.380659282301233   | 2 | 0.826686579108049    |
|            | 0.475797195518534   |   |                      |
| NIFK-AS1   | 0.178537380602791   | 2 | 0.914599796462       |
|            | 0.167249898107564   |   |                      |
| NIFK       | 0.272366486778076   | 2 | 0.872682704499966    |
|            | 0.0728818665195041  |   |                      |
| TSN        | 2.13717088238727    | 2 | 0.343494066475561    |
|            | 0.221653860671028   |   |                      |
| GYPC       | 27.4819803025502    | 2 | 1.07736732879449e-06 |
|            | 0.395305453503244   |   |                      |
| BIN1       | 9.65582087224193    | 2 | 0.00800322706014556  |
|            | 0.539955003734101   |   |                      |
| ERCC3      | 0.0639749028480393  | 2 | 0.968518735533884    |
|            | 0.0587196632891704  |   |                      |
| MAP3K2     | 1.86396754426171    | 2 | 0.393771781557566    |
|            | 0.256360667439154   |   |                      |
| IWS1       | 1.74115752032257    | 2 | 0.418709146934594    |
|            | 0.275855333639773   |   |                      |
| MYO7B      | 15.7704631182799    | 2 | 0.0003762594751332   |
|            | 3.85583217083739    |   |                      |
| LIMS2      | 13.7517119868979    | 2 | 0.00103241352109151  |
|            | 1.77341024841829    |   |                      |
| WDR33      | 9.45804733807004    | 2 | 0.0088350928048776   |
|            | 0.218104228203551   |   |                      |
| SFT2D3     | 0.594318413503674   | 2 | 0.74292572415465     |
|            | 0.447221451981243   |   |                      |
| POLR2D     | 1.49485895807073    | 2 | 0.473582342805299    |
|            | 0.117815729106424   |   |                      |
| AMMECR1L   | 0.130326085971153   | 2 | 0.93691469355485     |
|            | 0.255709625269483   |   |                      |
| AC012306.2 | 1.23355752502855    | 2 | 0.539680078336999    |
|            | 0.683106356712734   |   |                      |
| SAP130     | 0.00399577397635522 | 2 | 0.998004107459583    |
|            | 0.045914393023254   |   |                      |
| UGGT1      | 0.453207275260818   | 2 | 0.79723671430743     |
|            | 0.147336640518546   |   |                      |

|           |                     |   |                      |
|-----------|---------------------|---|----------------------|
| SMPD4     | 3.94442318513601    | 2 | 0.139148775268627    |
|           | 0.724451182217136   |   |                      |
| MZT2B     | 23.6204064169624    | 2 | 7.42837665368423e-06 |
|           | 0.384670797185143   |   |                      |
| CCDC115   | 3.48878775591704    | 2 | 0.174750877231421    |
|           | 0.224357295293282   |   |                      |
| IMP4      | 4.73204993889372    | 2 | 0.093853054538991    |
|           | 0.189971496382106   |   |                      |
| PTPN18    | 0.236358521822601   | 2 | 0.888536758428393    |
|           | 0.0590467749986621  |   |                      |
| FAM168B   | 0.904266830704793   | 2 | 0.636269275972475    |
|           | 0.220371381170916   |   |                      |
| PLEKHB2   | 2.34190757986137    | 2 | 0.310071057529984    |
|           | 0.324689811371971   |   |                      |
| MZT2A     | 28.0974571366449    | 2 | 7.91980894643274e-07 |
|           | 0.532902848393145   |   |                      |
| MGAT5     | 2.6153731911802     | 2 | 0.270444981866981    |
|           | 0.630056100205579   |   |                      |
| TMEM163   | 4.81548987078344    | 2 | 0.0900180624056739   |
|           | 1.0511255593595     |   |                      |
| CCNT2-AS1 | 0.531169304763152   | 2 | 0.766757532287051    |
|           | 0.886749640645551   |   |                      |
| CCNT2     | 0.193959464262759   | 2 | 0.907574400545578    |
|           | 0.143692262261679   |   |                      |
| RAB3GAP1  | 0.0222805659573848  | 2 | 0.988921540184915    |
|           | 0.0290247309026242  |   |                      |
| ZRANB3    | 4.08639127033256    | 2 | 0.12961384978272     |
|           | 1.00330027404743    |   |                      |
| R3HDM1    | 0.988454206970146   | 2 | 0.610042224642464    |
|           | 0.240199372563107   |   |                      |
| UBXN4     | 6.28620303401357    | 2 | 0.0431487635305572   |
|           | 0.140870510820924   |   |                      |
| MCM6      | 4.09704522051596    | 2 | 0.128925235776597    |
|           | 0.663070804894073   |   |                      |
| DARS      | 15.2654506799989    | 2 | 0.000484339069357298 |
|           | 0.445858099452819   |   |                      |
| DARS-AS1  | 4.60142760275549    | 2 | 0.100187304357509    |
|           | 3.54484733275766    |   |                      |
| CXCR4     | 244.279204390417    | 2 | 0                    |
|           | 1.14623639071168    |   |                      |
| SPOPL     | 0.00432907098307633 | 2 | 0.997837805426105    |
|           | 0.030689001513015   |   |                      |
| KYNU      | 16.82651134442      | 2 | 0.000221906225672863 |
|           | 1.31321435566314    |   |                      |
| ARHGAP15  | 2.07481473026043    | 2 | 0.354372249837382    |
|           | 0.399523638431372   |   |                      |
| GTDC1     | 0.841992465335038   | 2 | 0.656392574253579    |
|           | 0.281654724743223   |   |                      |
| ZEB2      | 19.4622066525641    | 2 | 5.94067128949494e-05 |
|           | 1.86229989497322    |   |                      |
| ZEB2-AS1  | 1.65588621353007    | 2 | 0.43694711620224     |
|           | 2.41719644294755    |   |                      |
| ORC4      | 0.0912391883503825  | 2 | 0.95540533482622     |

|                              |   |                                    |
|------------------------------|---|------------------------------------|
| 0.0195914353693363           |   |                                    |
| MBD5 0.248973926581908       | 2 | 0.882949772050638                  |
| 0.153026250487592            |   |                                    |
| EPC2 0.150750399303967       | 2 | 0.927395462588628                  |
| 0.148833489125812            |   |                                    |
| KIF5C 2.18386928156435 2     |   | 0.335566664362227                  |
| 1.52076076862241             |   |                                    |
| LYPD6B 0.138587493229893     | 2 | 0.933052558788361                  |
| 0.237110236863308            |   |                                    |
| MMADHC 0.128385237040834     | 2 | 0.93782433979534                   |
| 0.036044967938818            |   |                                    |
| RBM43 3.29663482509729 2     |   | 0.192373321395871                  |
| 3.65947199051316             |   |                                    |
| NMI 2.61517494577157 2       |   | 0.270471790433599                  |
| 0.278454974747597            |   |                                    |
| RIF1 1.55808919590624 2      |   | 0.458844182628286                  |
| 0.328282211159697            |   |                                    |
| ARL5A 0.467819808057854      | 2 | 0.791433117618808                  |
| 0.107120147086469            |   |                                    |
| CACNB4 0.86311663763365 2    |   | 0.649496183584713                  |
| 0.525952756842911            |   |                                    |
| STAM2 3.29003433081909 2     |   | 0.19300924968251 0.67186216650208  |
| FMNL2 7.83493018159343 2     |   | 0.0198914539190423                 |
| 1.92722763303732             |   |                                    |
| PRPF40A 1.15575352467828 2   |   | 0.56108842680683 0.113872554549014 |
| ARL6IP6 4.38315489055875 2   |   | 0.111740345240456                  |
| 0.404785800577243            |   |                                    |
| NR4A2 0.0968966125169832     | 2 | 0.952706587000967                  |
| 0.213348107104065            |   |                                    |
| GPD2 3.8386847799562 2       |   | 0.146703404045036                  |
| 1.9546815946002              |   |                                    |
| CYTIP 43.0523536494887 2     |   | 4.48022841048612e-10               |
| 0.309914497884152            |   |                                    |
| DAPL1 2.26018809979263 2     |   | 0.323002876606612                  |
| 0.453627162932436            |   |                                    |
| WDSUB1 8.61519910353396 2    |   | 0.0134658348686942                 |
| 0.55413244481716             |   |                                    |
| BAZ2B 0.00243821430418169    | 2 | 0.998781635657148                  |
| 0.00994875652777569          |   |                                    |
| MARCH7 1.34235399097167 2    |   | 0.511106653401054                  |
| 0.201020082212174            |   |                                    |
| CD302 0.214118345447781      | 2 | 0.898472506351772                  |
| 0.52067823286839             |   |                                    |
| LY75 3.3358574949778 2       |   | 0.188637376923233                  |
| 0.709994000795967            |   |                                    |
| RBMS1 4.21803578648923 2     |   | 0.121357093547421                  |
| 0.964247453585687            |   |                                    |
| TANK 4.66352513190692 2      |   | 0.097124407960911                  |
| 0.121545261710589            |   |                                    |
| LINC01806 4.76126396593308 2 |   | 0.0924921056003849                 |

|                              |   |                                    |  |
|------------------------------|---|------------------------------------|--|
| 2.32192812817922             |   |                                    |  |
| PSMD14 0.622886815903527     | 2 | 0.732389056729421                  |  |
| 0.0992413031172304           |   |                                    |  |
| IFIH1 1.73853021250613 2     |   | 0.419259547280503                  |  |
| 0.217983288540241            |   |                                    |  |
| GCA 4.27198016129473 2       |   | 0.118127576632128                  |  |
| 0.280833316235413            |   |                                    |  |
| COBLL1 9.11812819509534 2    |   | 0.0104718549934069                 |  |
| 0.55634808159823             |   |                                    |  |
| AC019197.1 1.8222123362858 2 | 2 | 0.402079210735409                  |  |
| 2.217093000957               |   |                                    |  |
| GALNT3 1.32401018346009 2    |   | 0.515816038433887                  |  |
| 0.837732587274057            |   |                                    |  |
| TTC21B 3.47181958282551 2    |   | 0.1762397858818 0.417524524873647  |  |
| STK39 0.00813599028930912    | 2 | 0.995940267939068                  |  |
| 0.0379270193032513           |   |                                    |  |
| DHRS9 164.827513258215 2     | 0 | 3.18733763812228                   |  |
| BBS5 1.1337371610229 2       |   | 0.567299111687277                  |  |
| 1.17428560479946             |   |                                    |  |
| FASTKD1 0.00938856449070119  | 2 | 0.995316718677006                  |  |
| 0.0468557998894064           |   |                                    |  |
| PPIG 10.6204681727997 2      |   | 0.00494077001523574                |  |
| 0.36881641724226             |   |                                    |  |
| PHOSPHO2 1.07282868001879 2  |   | 0.584841540133431                  |  |
| 0.609691343882138            |   |                                    |  |
| KLHL23 3.2051856197283 2     |   | 0.201373716766237                  |  |
| 1.64561920511694             |   |                                    |  |
| SSB 0.0246787628453789       | 2 | 0.98773643657479                   |  |
| 0.0154176389716449           |   |                                    |  |
| METTL5 0.40128896146239 2    |   | 0.81820326687919 0.091370128861696 |  |
| UBR3 2.14446650514919 2      |   | 0.342243347490947                  |  |
| 0.705484955329308            |   |                                    |  |
| GORASP2 18.2987609465408 2   |   | 0.000106285629141945               |  |
| 0.357053531556252            |   |                                    |  |
| TLK1 0.684766569187137       | 2 | 0.710075991357168                  |  |
| 0.16188687772018             |   |                                    |  |
| METTL8 0.678544912852713     | 2 | 0.712288355109548                  |  |
| 0.330084241855359            |   |                                    |  |
| DCAF17 3.17143551426481 2    |   | 0.204800743155909                  |  |
| 0.501247658908739            |   |                                    |  |
| DYNC1I2 2.01318620134216 2   |   | 0.3654619531092 0.176987066708414  |  |
| SLC25A12 0.479098570251133   | 2 | 0.78698248585551                   |  |
| 0.310580571543908            |   |                                    |  |
| HAT1 1.74628267226322 2      |   | 0.417637546551213                  |  |
| 0.186337067702215            |   |                                    |  |
| AC078883.3 0.177830896319218 | 2 | 0.914922928721585                  |  |
| 0.116482498611667            |   |                                    |  |
| AC078883.1 0.507499351107022 | 2 | 0.775886000972825                  |  |
| 0.725555296942693            |   |                                    |  |
| PDK1 1.02251550121588 2      |   | 0.599740779906846                  |  |

|                    |                    |   |                      |
|--------------------|--------------------|---|----------------------|
| 0.476013944455416  |                    |   |                      |
| MAP3K20            | 2.27624606427729   | 2 | 0.320419875556882    |
| 0.510890940698593  |                    |   |                      |
| CDCA7              | 17.7804509821056   | 2 | 0.000137728597913278 |
| 0.601496846748972  |                    |   |                      |
| SP3                | 0.203817815262345  | 2 | 0.903111814516561    |
| 0.0870876237874583 |                    |   |                      |
| OLA1               | 3.77030004446117   | 2 | 0.151806283403765    |
| 0.2369895568311    |                    |   |                      |
| CIR1               | 1.490894311289     | 2 | 0.474522067272111    |
| 0.172923778824332  |                    |   |                      |
| SCRN3              | 0.291615250680562  | 2 | 0.86432396122014     |
| 0.181772369413132  |                    |   |                      |
| WIPF1              | 18.4808065841285   | 2 | 9.70384474950903e-05 |
| 0.388651879701382  |                    |   |                      |
| CHRNA1             | 1.16495578654748   | 2 | 0.558512715625469    |
| 0.286793485963879  |                    |   |                      |
| ATF2               | 1.76669642995683   | 2 | 0.41339645170218     |
| ATP5MC3            | 7.22310127116327   | 2 | 0.583691587782733    |
| 0.122061111314706  |                    |   | 0.0270099318159335   |
| LNPK               | 0.0850661567663195 | 2 | 0.958358764038232    |
| 0.137056541637277  |                    |   |                      |
| MTX2               | 3.90521914380896   | 2 | 0.1419032811791      |
| LINC01116          | 1.53925476651738   | 2 | 0.430168141931846    |
| 0.542031176134463  |                    |   | 0.463185626879035    |
| HNRNPA3            | 2.91634081247648   | 2 | 0.23266156170182     |
| NFE2L2             | 2.45035703490342   | 2 | 0.0689037639866356   |
| 0.183547696102954  |                    |   | 0.293705264127978    |
| AGPS               | 0.820788720881173  | 2 | 0.663388584329993    |
| 0.231069060480789  |                    |   |                      |
| TTC30B             | 0.0796586624065385 | 2 | 0.960953429923471    |
| 0.228061968283121  |                    |   |                      |
| TTC30A             | 0.17646613054336   | 2 | 0.915547469535666    |
| 0.311277880592386  |                    |   |                      |
| RBM45              | 3.09570690439217   | 2 | 0.212704063582952    |
| 0.275203283253969  |                    |   |                      |
| AC009948.1         | 1.4416570329905    | 2 | 0.486349140703689    |
| 1.02370331265789   |                    |   |                      |
| PRKRA              | 7.60166863324012   | 2 | 0.0223521153332082   |
| 0.344298746362991  |                    |   |                      |
| FKBP7              | 0.501296786020479  | 2 | 0.778295977761095    |
| 0.670062315196691  |                    |   |                      |
| PLEKHA3            | 0.284816449067446  | 2 | 0.867267144486558    |
| 0.0347883394885502 |                    |   |                      |
| TTN-AS1            | 1.28947925000303   | 2 | 0.524799168901529    |
| 0.641850031181932  |                    |   |                      |
| TTN                | 4.8883409636728    | 2 | 0.0867981056522865   |
| 0.618383129779818  |                    |   |                      |
| CCDC141            | 4.48577224807352   | 2 | 0.106151694888938    |
| 0.972739472079176  |                    |   |                      |

|            |                     |   |                      |
|------------|---------------------|---|----------------------|
| SESTD1     | 0.0143298706448031  | 2 | 0.992860671632795    |
|            | 0.06050619576551    |   |                      |
| CWC22      | 1.76960574756061    | 2 | 0.412795538083148    |
|            | 0.329987366784383   |   |                      |
| UBE2E3     | 6.77108980448161    | 2 | 0.0338591873709821   |
|            | 0.223526553069439   |   |                      |
| ITGA4      | 2.52450839351144    | 2 | 0.283015334652486    |
|            | 0.515568952353076   |   |                      |
| SSFA2      | 0.0987489006615146  | 2 | 0.951824651905327    |
|            | 0.206933006767633   |   |                      |
| DNAJC10    | 29.7890793844258    | 2 | 3.39925387393691e-07 |
|            | 0.911909801088954   |   |                      |
| FRZB       | 76.9964648457826    | 2 | 0                    |
|            |                     |   | 4.86785176996001     |
| NUP35      | 3.54914286579442    | 2 | 0.169556100097109    |
|            | 0.878182005296559   |   |                      |
| AC096667.1 | 3.35747800236061    | 2 | 0.186609141643831    |
|            | 2.36989937868131    |   |                      |
| ZNF804A    | 0.171743816761319   | 2 | 0.917711774879144    |
|            | 0.198841792382851   |   |                      |
| LINC01473  | 1.77244237269452    | 2 | 0.412210479979608    |
|            | 0.914905338493411   |   |                      |
| ZC3H15     | 0.226925975081752   | 2 | 0.89273723820024     |
|            | 0.0469087539332051  |   |                      |
| ITGAV      | 5.01643783333891    | 2 | 0.0814131137255729   |
|            | 0.853988854612725   |   |                      |
| WDR75      | 0.413190965601467   | 2 | 0.813348596947198    |
|            | 0.232386196996512   |   |                      |
| ASNSD1     | 0.0744934691207395  | 2 | 0.963438392472358    |
|            | 0.0549414700681037  |   |                      |
| ANKAR      | 0.00438766867576003 | 2 | 0.997808570357848    |
|            | 0.0551332147535162  |   |                      |
| OSGEPL1    | 4.28918041147497    | 2 | 0.11711602068507     |
|            |                     |   | 2.1778071834352      |
| ORMDL1     | 5.18499916837735    | 2 | 0.0748327553437969   |
|            | 0.163388889071244   |   |                      |
| PMS1       | 0.034999685229165   | 2 | 0.982652390320218    |
|            | 0.0786581081799288  |   |                      |
| C2orf88    | 5.97719777425381    | 2 | 0.0503579444816694   |
|            | 0.565505054265693   |   |                      |
| HIBCH      | 0.0575666116352417  | 2 | 0.971626987571864    |
|            | 0.0391240294854376  |   |                      |
| INPP1      | 2.31378754815432    | 2 | 0.314461453708811    |
|            | 0.637007767696709   |   |                      |
| MFSD6      | 1.6318491546421     | 2 | 0.442230262213188    |
|            | 0.796929636443374   |   |                      |
| NEMP2      | 0.232919974702434   | 2 | 0.890065710150838    |
|            | 0.234322570711414   |   |                      |
| NAB1       | 3.35480710005659    | 2 | 0.186858515513264    |
|            | 0.761772337605252   |   |                      |
| GLS        | 2.42344816212016    | 2 | 0.297683606082738    |
|            | 0.315735091723319   |   |                      |



|            |                    |   |                     |
|------------|--------------------|---|---------------------|
| STAT1      | 1.12325292344355   | 2 | 0.570280769293754   |
|            | 0.408701350309302  |   |                     |
| NABP1      | 4.64445684865266   | 2 | 0.0980548341815854  |
|            | 1.21470253886088   |   |                     |
| SLC39A10   | 0.293910019546056  | 2 | 0.863332818082026   |
|            | 0.171989262492282  |   |                     |
| STK17B     | 2.54331128258978   | 2 | 0.280367050036654   |
|            | 0.155534490740363  |   |                     |
| AC114760.2 | 5.74473787909328   | 2 | 0.056564769218499   |
|            | 0.213055266134784  |   |                     |
| HECW2      | 2.16159790103295   | 2 | 0.339324313981108   |
|            | 0.940002038299538  |   |                     |
| GTF3C3     | 3.7609582432775    | 2 | 0.152517014046665   |
|            | 0.666600836897405  |   |                     |
| ANKRD44    | 7.64235088428612   | 2 | 0.0219020411754813  |
|            | 0.439762157406999  |   |                     |
| SF3B1      | 0.271416633283381  | 2 | 0.873097263293018   |
|            | 0.0567685332509498 |   |                     |
| COQ10B     | 4.59526425222989   | 2 | 0.100496525309558   |
|            | 0.396385409984336  |   |                     |
| HSPD1      | 2.84887646200322   | 2 | 0.240643611364291   |
|            | 0.153911356034077  |   |                     |
| HSPE1      | 0.314134946413453  | 2 | 0.854646391139568   |
|            | 0.0186538209079561 |   |                     |
| MOB4       | 9.10104030816724   | 2 | 0.010561709238625   |
|            | 0.312829488303007  |   |                     |
| MARS2      | 0.092744933482438  | 2 | 0.954686307062295   |
|            | 0.250317084867516  |   |                     |
| C2orf69    | 0.681826536657375  | 2 | 0.711120582208426   |
|            | 0.324377034737473  |   |                     |
| TYW5       | 0.497579848587674  | 2 | 0.779743761401459   |
|            | 0.31187979019799   |   |                     |
| MAIP1      | 1.5527789132137    | 2 | 0.460064097595734   |
|            | 0.297359300292635  |   |                     |
| SPATS2L    | 1.22830133360554   | 2 | 0.541100274624918   |
|            | 0.878915595056641  |   |                     |
| KCTD18     | 0.772768434548282  | 2 | 0.67950939627033    |
|            | 0.338381069884928  |   |                     |
| SGO2       | 0.980203154306791  | 2 | 0.612564168499607   |
|            | 0.393610289962214  |   |                     |
| BZW1       | 0.169064368431456  | 2 | 0.918942079470769   |
|            | 0.0400002765371778 |   |                     |
| CLK1       | 0.054060877223662  | 2 | 0.973331614210244   |
|            | 0.0423563097901363 |   |                     |
| PPIL3      | 2.04172834387614   | 2 | 0.360283458750907   |
|            | 0.288027819207381  |   |                     |
| NIF3L1     | 0.0536613291959655 | 2 | 0.973526079997579   |
|            | 0.0615159510201944 |   |                     |
| ORC2       | 11.439149240969    | 2 | 0.00328110632094836 |
|            | 0.452990995229316  |   |                     |

|                    |                    |   |                      |
|--------------------|--------------------|---|----------------------|
| AC005037.1         | 1.23092745398396   | 2 | 0.540390243654653    |
| 1.11231574475423   |                    |   |                      |
| FAM126B            | 10.6608052788712   | 2 | 0.00484211999123729  |
| 0.981805200390139  |                    |   |                      |
| NDUFB3             | 1.94218047789789   | 2 | 0.378669972221546    |
| 0.115263509100784  |                    |   |                      |
| CFLAR              | 2.82082203724196   | 2 | 0.244042956337381    |
| 0.181733274313363  |                    |   |                      |
| CASP8              | 0.671811793553144  | 2 | 0.714690357318093    |
| 0.256595069695338  |                    |   |                      |
| TRAK2              | 0.737597583845918  | 2 | 0.691564544824573    |
| 0.507336223348997  |                    |   |                      |
| STRADB             | 1.12472929393586   | 2 | 0.569859951783444    |
| 0.331749594989702  |                    |   |                      |
| SUM01              | 13.1862697459146   | 2 | 0.00136973926748707  |
| 0.283752422249319  |                    |   |                      |
| NOP58              | 0.0143457495233816 | 2 | 0.992852788907062    |
| 0.015454007766004  |                    |   |                      |
| BMPR2              | 0.823304126876665  | 2 | 0.66255476297853     |
| 0.703981215483269  |                    |   |                      |
| FAM117B            | 4.32512912730964   | 2 | 0.115029741346064    |
| 1.18754402849631   |                    |   |                      |
| ICA1L              | 0.482655250362972  | 2 | 0.785584207053712    |
| 0.360258220960152  |                    |   |                      |
| WDR12              | 0.456847374489451  | 2 | 0.795787023587738    |
| 0.111792144736033  |                    |   |                      |
| CARF               | 4.72166933260559   | 2 | 0.0943414466983156   |
| 1.09489460277089   |                    |   |                      |
| NBEAL1             | 0.353348686694357  | 2 | 0.838052657512464    |
| 0.0909248447651416 |                    |   |                      |
| CYP20A1            | 1.81866091784777   | 2 | 0.402793820778734    |
| 0.436334824283928  |                    |   |                      |
| ABI2               | 11.3694752110895   | 2 | 0.00339742459806114  |
| 0.615133170598885  |                    |   |                      |
| RAPH1              | 1.82732845517744   | 2 | 0.401051982627853    |
| 1.15327070908533   |                    |   |                      |
| IN080D             | 0.074917656705712  | 2 | 0.963234074837888    |
| 0.0957318160824775 |                    |   |                      |
| NDUFS1             | 1.60239941756318   | 2 | 0.448790223443724    |
| 0.264374257896101  |                    |   |                      |
| EEF1B2             | 60.5243868720314   | 2 | 7.19424519957101e-14 |
| 0.453630445716989  |                    |   |                      |
| ZDBF2              | 3.62450676562274   | 2 | 0.163285776568003    |
| 1.46418562169691   |                    |   |                      |
| ADAM23             | 1.68691607848643   | 2 | 0.430220229729483    |
| 1.25291834541414   |                    |   |                      |
| FASTKD2            | 0.49744234318577   | 2 | 0.779797372734047    |
| 0.220543618858333  |                    |   |                      |
| KLF7               | 0.903851675910351  | 2 | 0.636401364801567    |
| 0.472534274711743  |                    |   |                      |

|            |                   |   |                      |
|------------|-------------------|---|----------------------|
| CREB1      | 2.12093272567131  | 2 | 0.346294273886148    |
|            | 0.17821944005413  |   |                      |
| METTL21A   | 0.569567518846255 | 2 | 0.752176887898909    |
|            | 0.118812610532203 |   |                      |
| LINC01857  | 2.07267284933855  | 2 | 0.354751964707684    |
|            | 0.206235098218678 |   |                      |
| CCNYL1     | 4.358388510307    | 2 | 0.113132649975741    |
|            | 1.68715453336019  |   |                      |
| IDH1       | 5.94364722245094  | 2 | 0.0512098382935271   |
|            | 0.474524129814928 |   |                      |
| PIKFYVE    | 3.74771931494229  | 2 | 0.153529943783494    |
|            | 0.725773068167025 |   |                      |
| MAP2       | 11.0967750546222  | 2 | 0.00389373071865495  |
|            | 1.31533498342178  |   |                      |
| RPE        | 0.227608444915497 | 2 | 0.89243265705279     |
|            | 0.130398199452165 |   |                      |
| LANCL1     | 10.0613204207322  | 2 | 0.00653449500477588  |
|            | 1.12829620341445  |   |                      |
| IKZF2      | 0.475412680400972 | 2 | 0.788434188527095    |
|            | 0.502229990465349 |   |                      |
| AC079610.2 | 2.59851856789497  | 2 | 0.27273373649008     |
|            | 1.19576003007823  |   |                      |
| SPAG16     | 7.63901805739914  | 2 | 0.0219385694584939   |
|            | 0.626001472520848 |   |                      |
| BARD1      | 5.69479831223865  | 2 | 0.0579949607332791   |
|            | 0.314106605297538 |   |                      |
| ATIC       | 3.45726533582056  | 2 | 0.1775269824334      |
|            |                   |   | 0.307143583181726    |
| MREG       | 3.61729848785029  | 2 | 0.16387534298633     |
|            |                   |   | 1.02089462872846     |
| XRCC5      | 0.153156657457985 | 2 | 0.926280357084141    |
|            | 0.03437800956267  |   |                      |
| SMARCAL1   | 2.27468494505886  | 2 | 0.320670080006772    |
|            | 0.385201311571522 |   |                      |
| RPL37A     | 18.6772851117675  | 2 | 8.79587541779969e-05 |
|            | 0.181459586524217 |   |                      |
| ARPC2      | 77.635688112572   | 2 | 0                    |
|            |                   |   | 0.319256757972908    |
| AAMP       | 0.939092251906406 | 2 | 0.625286004976954    |
|            | 0.126181103414277 |   |                      |
| PNKD       | 5.71511488943674  | 2 | 0.057408813352399    |
|            | 0.227506334542255 |   |                      |
| TMBIM1     | 6.14317871692737  | 2 | 0.0463474336023336   |
|            | 0.657771942869177 |   |                      |
| SLC11A1    | 2.0031673397185   | 2 | 0.36729730266789     |
|            |                   |   | 1.6458144113083      |
| CTDSP1     | 0.847887730832185 | 2 | 0.654460618752263    |
|            | 0.162820120677638 |   |                      |
| USP37      | 2.54567205675496  | 2 | 0.280036303635199    |
|            | 0.881320980991292 |   |                      |
| CNOT9      | 0.710094914106518 | 2 | 0.701140168372703    |
|            | 0.213993582639242 |   |                      |
| ZNF142     | 2.113363738025    | 2 | 0.347607305439419    |
|            | 1.56296367180234  |   |                      |

|         |                      |   |                      |
|---------|----------------------|---|----------------------|
| BCS1L   | 4.37819395013325     | 2 | 0.112017857877013    |
|         | 1.22566022415336     |   |                      |
| RNF25   | 0.749827166180708    | 2 | 0.68734867477285     |
|         | 0.28973283166156     |   |                      |
| TLL4    | 2.0422499684615      | 2 | 0.360189504648741    |
|         | 2.06515607938671     |   |                      |
| WNT6    | 8.43486401763439e-05 | 2 | 0.999957826569236    |
|         | 0.00539380260547586  |   |                      |
| WNT10A  | 12.6107228448333     | 2 | 0.00182648591648316  |
|         | 2.60370116398615     |   |                      |
| CNPPD1  | 1.15842200788038     | 2 | 0.560340298488864    |
|         | 0.157365147096       |   |                      |
| RETREG2 | 3.38777002402442     | 2 | 0.183804054130196    |
|         | 0.421052665929995    |   |                      |
| ZFAND2B | 0.705629057356703    | 2 | 0.702707513382796    |
|         | 0.162812667778596    |   |                      |
| ANKZF1  | 5.01732969512208     | 2 | 0.081376817196656    |
|         | 0.454021578618318    |   |                      |
| GLB1L   | 1.83686937465195     | 2 | 0.399143336471633    |
|         | 1.55245953870087     |   |                      |
| STK16   | 1.40867678982035     | 2 | 0.49443558716857     |
|         | 0.223585021527009    |   |                      |
| TUBA4A  | 8.08526384039988     | 2 | 0.0175512181679495   |
|         | 0.285877868894486    |   |                      |
| DNAJB2  | 1.70653389281516     | 2 | 0.426020868677146    |
|         | 0.206446662485322    |   |                      |
| DNPEP   | 3.69680093628189     | 2 | 0.157488873423679    |
|         | 0.260369888821103    |   |                      |
| GMPPA   | 0.0495285164804788   | 2 | 0.975539860406459    |
|         | 0.0743279370572074   |   |                      |
| CHPF    | 2.91759109289321     | 2 | 0.232516161057289    |
|         | 0.730087867291835    |   |                      |
| STK11IP | 2.47454622524857     | 2 | 0.290174413006504    |
|         | 0.63269577134449     |   |                      |
| SGPP2   | 4.17763739236637     | 2 | 0.123833334238462    |
|         | 9.62937669504538     |   |                      |
| FARSB   | 1.69337543141974     | 2 | 0.428832998937197    |
|         | 0.205428571402148    |   |                      |
| ACSL3   | 0.252392466656399    | 2 | 0.881441861541131    |
|         | 0.158251214747778    |   |                      |
| AP1S3   | 4.3795482547452      | 2 | 0.111942030402513    |
|         | 0.657597566068259    |   |                      |
| WDFY1   | 2.97272034050471     | 2 | 0.226194468357442    |
|         | 0.737269605246612    |   |                      |
| MRPL44  | 1.02098881687903     | 2 | 0.600198762110597    |
|         | 0.147281254028959    |   |                      |
| CUL3    | 1.80874771050993     | 2 | 0.404795266196864    |
|         | 0.166908971420095    |   |                      |
| DOCK10  | 16.34467315518       | 2 | 0.000282357494869934 |
|         | 1.66701349590375     |   |                      |
| IRS1    | 2.6469750140872      | 2 | 0.266205288375746    |

|                            |   |                                    |
|----------------------------|---|------------------------------------|
| 0.83756780191275           |   |                                    |
| RHBDD1 0.223273105859735   | 2 | 0.894369254322309                  |
| 0.0419030523835688         |   |                                    |
| COL4A4 3.81821777381372 2  |   | 0.148212401778288                  |
| 1.59034396546895           |   |                                    |
| MFF 0.265162551220212      | 2 | 0.875831747453748                  |
| 0.0737756014361558         |   |                                    |
| AGFG1 0.329895311501472    | 2 | 0.847938087608913                  |
| 0.106726600492112          |   |                                    |
| PID1 3.02899037276585 2    |   | 0.219919175024937                  |
| 1.87704666130287           |   |                                    |
| DNER 5.16221651114059 2    |   | 0.0756900735775857                 |
| 1.20288015167788           |   |                                    |
| TRIP12 0.467392661389521   | 2 | 0.791602164679837                  |
| 0.183364944430622          |   |                                    |
| SP110 29.598919945657 2    |   | 3.73831762767729e-07               |
| 0.653087120337765          |   |                                    |
| SP140 12.4651871934813 2   |   | 0.00196435055089617                |
| 0.374592284904071          |   |                                    |
| SP140L 6.11156590239247 2  |   | 0.0470858404193725                 |
| 0.476976438775223          |   |                                    |
| SP100 13.099389780858 2    |   | 0.00143055200683739                |
| 0.396522231005633          |   |                                    |
| CAB39 6.58932468039976 2   |   | 0.0370805635492596                 |
| 0.608023683139107          |   |                                    |
| ITM2C 1.36559449517043 2   |   | 0.505201839396428                  |
| 0.996382875009953          |   |                                    |
| PSMD1 7.57633404395435 2   |   | 0.0226370570743772                 |
| 0.318517904925253          |   |                                    |
| ARMC9 3.80612401549597 2   |   | 0.149111339406174                  |
| 0.91454673065052           |   |                                    |
| B3GNT7 0.00154940607409259 | 2 | 0.999225596967875                  |
| 0.0312365165536308         |   |                                    |
| NCL 0.159638004211102      | 2 | 0.923283443623331                  |
| 0.0315039137940536         |   |                                    |
| PTMA 44.7690071974453 2    |   | 1.89903759384435e-10               |
| 0.267772991509027          |   |                                    |
| PDE6D 5.65839253512247 2   |   | 0.0590603032800875                 |
| 0.332347540904869          |   |                                    |
| COPS7B 2.53473649434606 2  |   | 0.281571674583788                  |
| 0.333285741122265          |   |                                    |
| DIS3L2 1.68844240268953 2  |   | 0.429892027206627                  |
| 0.522242781693307          |   |                                    |
| TIGD1 0.224550264500916    | 2 | 0.893798310927251                  |
| 0.238682965734241          |   |                                    |
| EIF4E2 1.90779106420901 2  |   | 0.385237392005285                  |
| 0.0949634834130612         |   |                                    |
| GIGYF2 2.51766158122933 2  |   | 0.28398587141003 0.186487519198552 |
| INPP5D 7.08133007868625 2  |   | 0.0289940384927587                 |
| 0.351859109653725          |   |                                    |

|            |                    |   |                      |
|------------|--------------------|---|----------------------|
| ATG16L1    | 3.82680967063427   | 2 | 0.147577054632885    |
|            | 1.11225998540191   |   |                      |
| DGKD       | 2.63043714722958   | 2 | 0.268415648248563    |
|            | 0.187296769368252  |   |                      |
| USP40      | 0.0377123027513544 | 2 | 0.981320513696256    |
|            | 0.0868196161225139 |   |                      |
| ARL4C      | 1.08594980132145   | 2 | 0.581017210328675    |
|            | 0.523427875131515  |   |                      |
| IQCA1      | 0.256041756130235  | 2 | 0.87983500970026     |
|            | 0.33199682658982   |   |                      |
| COPS8      | 1.7534417869644    | 2 | 0.416145261455033    |
|            | 0.181871300307758  |   |                      |
| LRRFIP1    | 17.7458639911233   | 2 | 0.00014013112093525  |
|            | 0.541479624921863  |   |                      |
| RAMP1      | 14.9281442677159   | 2 | 0.000573316788873068 |
|            | 2.07551768351387   |   |                      |
| UBE2F      | 2.93817301442609   | 2 | 0.23013561642105     |
|            | 0.158062501748653  | 2 | 0.308156532500102    |
|            | 0.185987793004768  |   | 0.924011047840747    |
| ILKAP      | 3.14524618457139   | 2 | 0.207500175757905    |
|            | 0.226051617415785  |   |                      |
| HES6       | 19.9037690620626   | 2 | 4.76377744277334e-05 |
|            | 1.13235501749616   |   |                      |
| PER2       | 1.49660920349586   | 2 | 0.473168081432048    |
|            | 0.571425733087682  |   |                      |
| TRAF3IP1   | 3.06229949352728   | 2 | 0.21628684919962     |
|            | 0.998882723607     | 2 | 0.748207474180504    |
|            | 0.246008845793467  |   | 0.606869585566147    |
| AC062017.1 | 0.138297576535602  | 2 | 0.933187822348638    |
|            | 0.237785189257588  |   |                      |
| NDUFA10    | 0.309602743519585  | 2 | 0.856585302618473    |
|            | 0.0688063181505159 |   |                      |
| COPS9      | 4.3913880693993    | 2 | 0.11128130161275     |
|            | 0.957663085527058  | 2 | 0.146930748239315    |
|            | 0.77758043551883   |   | 0.61950683631278     |
| DUSP28     | 7.7950403105874    | 2 | 0.0202921705343597   |
|            | 1.10816047424464   |   |                      |
| RNPEPL1    | 0.0357069987782283 | 2 | 0.982304930089825    |
|            | 0.0499285134113746 |   |                      |
| CAPN10-DT  | 0.283447795624114  | 2 | 0.867860841686613    |
|            | 0.246734444629864  |   |                      |
| CAPN10     | 0.937812440618307  | 2 | 0.625686257068812    |
|            | 0.309371902959603  |   |                      |
| SNED1      | 0.971120732935168  | 2 | 0.615352277350695    |
|            | 0.63865716671509   |   |                      |
| MTERF4     | 3.12643746046442   | 2 | 0.209460787236976    |
|            | 0.23161780415885   |   |                      |
| PASK       | 0.24241544151813   | 2 | 0.885849931060166    |
|            | 0.0428965431978184 |   |                      |
| PPP1R7     | 0.815549411441675  | 2 | 0.665128711637169    |

|                                |   |                                    |  |
|--------------------------------|---|------------------------------------|--|
| 0.0549668457318065             |   |                                    |  |
| HDLBP 0.024452747962917        | 2 | 0.987848064449369                  |  |
| 0.01829109359132               |   |                                    |  |
| SEPT2 4.60887318010447 2       |   | 0.0998150215905145                 |  |
| 0.125730573583198              |   |                                    |  |
| FARP2 0.016079930413657        | 2 | 0.991992268868639                  |  |
| 0.0645766977629392             |   |                                    |  |
| STK25 4.82259556499674 2       |   | 0.0896988094573864                 |  |
| 0.292956848432774              |   |                                    |  |
| THAP4 0.0269690120858629       | 2 | 0.986606002630358                  |  |
| 0.0427940868688575             |   |                                    |  |
| ATG4B 3.62327650731479 2       |   | 0.163386249308287                  |  |
| 0.230546853810447              |   |                                    |  |
| DTYMK 0.889126749067504        | 2 | 0.641104137323462                  |  |
| 0.102124218863196              |   |                                    |  |
| ING5 7.08960049513249 2        |   | 0.0288743896632729                 |  |
| 0.89855147422876               |   |                                    |  |
| D2HGDH 1.05710437677938 2      |   | 0.589457775989814                  |  |
| 0.388884356538429              |   |                                    |  |
| CHL1 3.83103868393072 2        |   | 0.147265331656038                  |  |
| 3.78439475646082               |   |                                    |  |
| TRNT1 2.3935946538058 2        |   | 0.302160384853894                  |  |
| 0.355882204534487              |   |                                    |  |
| CRBN 0.0840042294844917        | 2 | 0.958867752812195                  |  |
| 0.0482743572469411             |   |                                    |  |
| SUMF1 0.0944781550684933       | 2 | 0.953859323992622                  |  |
| 0.179411457536083              |   |                                    |  |
| SETMAR 1.31764744801561 2      |   | 0.517459652012504                  |  |
| 0.404744646018438              |   |                                    |  |
| ITPR1 0.5170364981626 2        |   | 0.77219493907238 0.19627868968298  |  |
| ARL8B 5.20751030714578 2       |   | 0.0739951925393423                 |  |
| 0.410650028978085              |   |                                    |  |
| AC026202.2 1.03829765802385 2  |   | 0.595026802036264                  |  |
| 0.618095394875664              |   |                                    |  |
| AC026202.3 1.47212147894801 2  |   | 0.478997098273355                  |  |
| 1.84973999614362               |   |                                    |  |
| EDEM1 0.0280125479200601       | 2 | 0.986091357545691                  |  |
| 0.0409645746484822             |   |                                    |  |
| AC069277.1 0.115871721280992   | 2 | 0.943710474481085                  |  |
| 0.341001050961277              |   |                                    |  |
| LMCD1 2.98188050493426 2       |   | 0.22516084793596 0.727726327191256 |  |
| RAD18 0.460228174045928        | 2 | 0.794442961700547                  |  |
| 0.279363704723989              |   |                                    |  |
| THUMPD3-AS1 13.3245472451779 2 |   | 0.00127823683590178                |  |
| 0.565213826252934              |   |                                    |  |
| THUMPD3 0.175558315203802      | 2 | 0.915963137884524                  |  |
| 0.107489798726472              |   |                                    |  |
| SETD5 2.88636628371445 2       |   | 0.23617478306621 0.25746132900473  |  |
| MTMR14 13.4412806462061 2      |   | 0.00120576588696075                |  |
| 0.485356505135112              |   |                                    |  |

|           |                     |   |                                    |
|-----------|---------------------|---|------------------------------------|
| BRPF1     | 0.19265026912526    | 2 | 0.908168691030967                  |
|           | 0.245135358873699   |   |                                    |
| OGG1      | 5.60712328124852    | 2 | 0.060593864274767                  |
|           | 0.219275721288021   |   |                                    |
| CAMK1     | 84.8030952307791    | 2 | 0 3.27341800434212                 |
| TADA3     | 6.95839331603244    | 2 | 0.0308321698630176                 |
|           | 0.237931299037437   |   |                                    |
| ARPC4     | 6.15290786444694    | 2 | 0.0461225205894983                 |
|           | 0.205613367910099   |   |                                    |
| TTL3      | 2.08253594459105    | 2 | 0.353006795228323                  |
|           | 0.705371718116196   |   |                                    |
| RPUSD3    | 0.00324271978302234 | 2 | 0.998379953802352                  |
|           | 0.0100562251639012  |   |                                    |
| JAGN1     | 0.0437712589243312  | 2 | 0.978352123311262                  |
|           | 0.0374816535669443  |   |                                    |
| CRELD1    | 1.26638638551339    | 2 | 0.530893845118632                  |
|           | 0.654272998292325   |   |                                    |
| PRRT3     | 4.3525721940828     | 2 | 0.113462136476716                  |
|           | 1.70534009458536    |   |                                    |
| EMC3      | 2.16519569315649    | 2 | 0.338714453511285                  |
|           | 0.191709286647849   |   |                                    |
| FANCD2    | 0.327888914120158   | 2 | 0.848789164816553                  |
|           | 0.234552434103509   |   |                                    |
| BRK1      | 44.5064498613405    | 2 | 2.16544560061038e-10               |
|           | 0.391284401928322   |   |                                    |
| VHL       | 1.02022644549132    | 2 | 0.600427592902925                  |
|           | 0.231858577420287   |   |                                    |
| IRAK2     | 1.31284028945376    | 2 | 0.518704903241317                  |
|           | 0.727949720222126   |   |                                    |
| TATDN2    | 0.239027077220324   | 2 | 0.887351994225001                  |
|           | 0.274031896422731   |   |                                    |
| LINC00852 | 0.292870654595      | 2 | 0.863781593618422                  |
|           | 0.502512401523829   |   |                                    |
| GHRL      | 2.30918268565624    | 2 | 0.31518631373642 0.795842012830305 |
| SEC13     | 15.0161688289957    | 2 | 0.000548631032416314               |
|           | 0.285240134909049   |   |                                    |
| ATG7      | 1.54099490690364    | 2 | 0.462782798141253                  |
|           | 0.392942841874724   |   |                                    |
| VGLL4     | 22.0730515596018    | 2 | 1.61026648699547e-05               |
|           | 0.941109404746443   |   |                                    |
| TAMM41    | 0.00879696048872253 | 2 | 0.995611178902823                  |
|           | 0.0277085071739338  |   |                                    |
| TSEN2     | 0.4288520431022     | 2 | 0.807004510465603                  |
|           | 0.314574168891534   |   |                                    |
| MKRN2     | 1.70768350999694    | 2 | 0.425776058588142                  |
|           | 0.328158872903704   |   |                                    |
| RAF1      | 0.942648037801484   | 2 | 0.624175301047421                  |
|           | 0.202591438970057   |   |                                    |
| RPL32     | 47.5308805854242    | 2 | 4.77310413415921e-11               |
|           | 0.158754699215518   |   |                                    |



|          |                    |   |                     |
|----------|--------------------|---|---------------------|
| IQSEC1   | 1.29122860163075   | 2 | 0.524340340453682   |
|          | 0.336663033074978  |   |                     |
| NUP210   | 0.379560093971854  | 2 | 0.827141046102719   |
|          | 0.144538369620172  |   |                     |
| CHCHD4   | 0.1143354735547    | 2 | 0.944435639489054   |
|          | 0.105147833189745  |   |                     |
| TMEM43   | 0.302258232425076  | 2 | 0.859736685547945   |
|          | 0.196308204328611  |   |                     |
| XPC      | 5.7868657732652    | 2 | 0.0553857528745039  |
|          | 0.513875829899979  |   |                     |
| LSM3     | 1.80157705629952   | 2 | 0.406249194483598   |
|          | 0.0788385354414757 |   |                     |
| SLC6A6   | 0.8183887315215    | 2 | 0.664185124928509   |
|          | 0.178940007907375  |   |                     |
| CCDC174  | 6.45742393074594   | 2 | 0.0396084830442917  |
|          | 0.436308008228758  |   |                     |
| FGD5-AS1 | 1.1844910609708    | 2 | 0.553083922444172   |
|          | 0.378569562902573  |   |                     |
| NR2C2    | 3.16315898966739   | 2 | 0.20565001839992    |
| MRPS25   | 0.452828317406455  | 2 | 0.825082725067498   |
|          | 0.131947215248113  |   | 0.797387788176972   |
| RBSN     | 1.6749895915193    | 2 | 0.432793402313015   |
|          | 1.44201099402768   |   |                     |
| CAPN7    | 0.850448911167954  | 2 | 0.653623059318269   |
|          | 0.23133411958736   |   |                     |
| SH3BP5   | 0.195572216605344  | 2 | 0.906842849167743   |
|          | 0.0755980933603952 |   |                     |
| METTL6   | 2.94551425340481   | 2 | 0.229292424607097   |
|          | 0.623152549876084  |   |                     |
| EMF1     | 0.641625885767577  | 2 | 0.725558959263708   |
|          | 0.304919883758086  |   |                     |
| EMF1-AS1 | 0.0159825259014329 | 2 | 0.992040582306655   |
|          | 0.106548692032722  |   |                     |
| HACL1    | 1.24049338973723   | 2 | 0.537811745830182   |
|          | 0.297035952939638  |   |                     |
| BTD      | 0.176125558109806  | 2 | 0.915703387925533   |
|          | 0.447331435662441  |   |                     |
| ANKRD28  | 12.1991625679432   | 2 | 0.00224380704079019 |
|          | 0.574168661669122  |   |                     |
| DPH3     | 3.14976519913367   | 2 | 0.20703185688414    |
| OXNAD1   | 1.25428939443926   | 2 | 0.346110563173939   |
|          | 0.784941098996723  |   | 0.534114684969879   |
| RFTN1    | 5.22982969738608   | 2 | 0.073174019294085   |
|          | 0.12338391433604   |   |                     |
| PLCL2    | 6.69617353527616   | 2 | 0.0351515428758822  |
|          | 0.721856236286655  |   |                     |
| TBC1D5   | 1.08460923256525   | 2 | 0.581406787637374   |
|          | 0.305383655325236  |   |                     |
| SATB1    | 4.12821250866317   | 2 | 0.126931684531      |
| KCNH8    | 0.999512811078732  | 2 | 1.04898136829355    |
|          |                    |   | 0.606678425218243   |

|                                |   |                      |
|--------------------------------|---|----------------------|
| 0.920501179900545              |   |                      |
| RAB5A 0.119116591977283        | 2 | 0.942180606640292    |
| 0.0586294708545279             |   |                      |
| KAT2B 1.28816234240721 2       |   | 0.525144838698737    |
| 0.635856386035568              |   |                      |
| SG01 4.48779435027187 2        |   | 0.106044424338283    |
| 0.458833598179278              |   |                      |
| UBE2E2 0.519969392511887       | 2 | 0.771063385869982    |
| 0.107676992586263              |   |                      |
| UBE2E1 12.082639697016 2       |   | 0.00237841769006364  |
| 0.28374858682363               |   |                      |
| NKIRAS1 0.136230294733836      | 2 | 0.934152902137068    |
| 0.271166709552359              |   |                      |
| RPL15 43.476383607188 2        |   | 3.62429308786716e-10 |
| 0.194217722638288              |   |                      |
| NR1D2 0.00614122201105595      | 2 | 0.99693409849886     |
| 0.0746994680122801             |   |                      |
| TOP2B 1.03901229284665 2       |   | 0.594814226580363    |
| 0.227757667807125              |   |                      |
| NGLY1 0.656463000701506        | 2 | 0.720196274715077    |
| 0.0751844274890909             |   |                      |
| OXSM 1.2206458866306 2         |   | 0.543175425874098    |
| 0.430243382143293              |   |                      |
| SLC4A7 1.28985304408692 2      |   | 0.524701094654423    |
| 0.357863816891791              |   |                      |
| CMC1 1.98472599397775 2        |   | 0.370699692999945    |
| 0.125852987697783              |   |                      |
| AZI2 0.403155471947304         | 2 | 0.817440030593508    |
| 0.200751896934                 |   |                      |
| TGFBR2 0.187662893991527       | 2 | 0.910436206066393    |
| 0.206972348923612              |   |                      |
| STT3B 0.0866876531839286       | 2 | 0.957582091272465    |
| 0.0620306340692687             |   |                      |
| OSBPL10 6.99195106794569 2     |   | 0.0303191566377383   |
| 0.379570917680257              |   |                      |
| OSBPL10-AS1 3.98702177573994 2 |   | 0.136216344626075    |
| 0.576923320950166              |   |                      |
| ZNF860 5.21054319427381 2      |   | 0.0738830680425707   |
| 1.59895589738984               |   |                      |
| GPD1L 1.73664855860177 2       |   | 0.419654183575664    |
| 1.15670607294149               |   |                      |
| CMTM7 0.355966160347538        | 2 | 0.83695658452894     |
| 0.118013840807979              |   |                      |
| CMTM6 0.508868629610135        | 2 | 0.775354980761208    |
| 0.0394999619262671             |   |                      |
| DYNC1LI1 0.340511599655735     | 2 | 0.84344903488116     |
| 0.115053853095027              |   |                      |
| CNOT10 2.23621334302787 2      |   | 0.326898134628286    |
| 0.459758409447921              |   |                      |
| GLB1 0.216728334402512         | 2 | 0.897300769414325    |

|                               |   |                                    |
|-------------------------------|---|------------------------------------|
| 0.112995578246433             |   |                                    |
| CRTAP 1.43628105394402 2      |   | 0.487658200680093                  |
| 0.308481374224936             |   |                                    |
| UBP1 5.74266351732158 2       |   | 0.0566234675510771                 |
| 0.592747296407335             |   |                                    |
| CLASP2 1.72898745984281 2     |   | 0.421264772398804                  |
| 0.656568373047994             |   |                                    |
| PDCD6IP 0.193111421478625     | 2 | 0.907959313106114                  |
| 0.0428636122978366            |   |                                    |
| TRANK1 1.5982830779567 2      |   | 0.449714861133888                  |
| 0.297067578804363             |   |                                    |
| EPM2AIP1 0.708041188602412    | 2 | 0.701860512879748                  |
| 0.225387470347189             |   |                                    |
| MLH1 0.00165928755939007      | 2 | 0.99917070027955                   |
| 0.0100797283203011            |   |                                    |
| LRRFIP2 1.4248468672853 2     |   | 0.49045417292779 0.281439777534169 |
| GOLGA4 5.38728943140326 2     |   | 0.0676339829625228                 |
| 0.240358213655645             |   |                                    |
| VILL 0.00145255510366933      | 2 | 0.999273986123869                  |
| 0.0225241183364932            |   |                                    |
| PLCD1 1.12372491947086 2      |   | 0.570146200044638                  |
| 1.00679877192832              |   |                                    |
| ACAA1 0.329577708077449       | 2 | 0.848072752321116                  |
| 0.0945707329790155            |   |                                    |
| MYD88 0.194936976802221       | 2 | 0.907130926251313                  |
| 0.126570505034207             |   |                                    |
| OXSRI 2.76617525743364 2      |   | 0.250802969867426                  |
| 0.463610007074731             |   |                                    |
| EXOG 1.08860272093365 2       |   | 0.580247025275209                  |
| 0.131561665602205             |   |                                    |
| WDR48 0.0180739248331743      | 2 | 0.99100374820253                   |
| 0.0393020657180936            |   |                                    |
| GORASP1 0.288281541661091     | 2 | 0.86576586490075                   |
| 0.20843585069591              |   |                                    |
| TTC21A 2.3075214245879 2      |   | 0.315448225873612                  |
| 0.440042195555204             |   |                                    |
| CSRNP1 0.932855952525357      | 2 | 0.627238783285185                  |
| 0.236310001751097             |   |                                    |
| SLC25A38 3.67110605578788 2   |   | 0.159525255452976                  |
| 0.352764659818133             |   |                                    |
| RPSA 3.99093095915287 2       |   | 0.135950357321555                  |
| 0.0910556604076596            |   |                                    |
| EIF1B 6.56086400732851 2      |   | 0.0376120047730778                 |
| 0.175125138187132             |   |                                    |
| ENTPD3-AS1 1.22440823692651 2 |   | 0.542154578259595                  |
| 0.353299941076506             |   |                                    |
| RPL14 47.8113355175632 2      |   | 4.14859258057731e-11               |
| 0.268246624099555             |   |                                    |
| ZNF620 0.0211088404701339     | 2 | 0.989501082221145                  |
| 0.100307874389218             |   |                                    |

|            |                    |   |                      |
|------------|--------------------|---|----------------------|
| ZNF621     | 0.0196337392886592 | 2 | 0.990231158529883    |
|            | 0.0872706429053014 |   |                      |
| CTNNB1     | 1.98152884655219   | 2 | 0.371292757687026    |
|            | 0.27078945905727   |   |                      |
| ULK4       | 5.7678816399125    | 2 | 0.0559139811566673   |
|            | 11.7401762153883   |   |                      |
| TRAK1      | 2.30422614617459   | 2 | 0.315968399149497    |
|            | 0.510916831835063  |   |                      |
| SEC22C     | 3.77294042642971   | 2 | 0.151606002350769    |
|            | 0.680447140945239  |   |                      |
| SS18L2     | 3.90434151913058   | 2 | 0.141965563754034    |
|            | 0.21850074133828   |   |                      |
| NKTR       | 14.4257490764458   | 2 | 0.000737035470859349 |
|            | 0.430479832160005  |   |                      |
| HIGD1A     | 1.95699821848386   | 2 | 0.375874822749236    |
|            | 0.221436610034634  |   |                      |
| SNRK       | 1.04591651749538   | 2 | 0.592764401207454    |
|            | 0.370830252246403  |   |                      |
| ABHD5      | 5.29804068395132   | 2 | 0.0707204610023464   |
|            | 0.77868717077909   |   |                      |
| AC006058.1 | 10.2096127312592   | 2 | 0.00606751368061342  |
|            | 1.55786492387103   |   |                      |
| TCAIM      | 2.94672442962623   | 2 | 0.22915372445423     |
| ZNF445     | 0.167134590510072  | 2 | 0.713851085017821    |
|            | 0.33162435107703   |   | 0.91982918444884     |
| ZNF852     | 3.7783773420256    | 2 | 0.151194427509344    |
|            | 1.05099661552662   |   |                      |
| ZKSCAN7    | 0.243580558201823  | 2 | 0.885334022081334    |
|            | 0.489214470638306  |   |                      |
| ZNF660     | 0.129131040531267  | 2 | 0.937474688659135    |
|            | 0.213596317390039  |   |                      |
| ZNF197     | 0.132785707357994  | 2 | 0.935763174066517    |
|            | 0.23225359045834   |   |                      |
| ZNF35      | 3.11053478967206   | 2 | 0.211132919239976    |
|            | 1.11301696110424   |   |                      |
| KIAA1143   | 0.169938743392076  | 2 | 0.918540417305726    |
|            | 0.0809786585473527 |   |                      |
| TMEM42     | 1.39949086839957   | 2 | 0.496711733518303    |
|            | 0.360869746979738  |   |                      |
| ZDHHC3     | 7.04286818370275   | 2 | 0.0295570172819545   |
|            | 0.296760542758284  |   |                      |
| EXOSC7     | 0.474157739917421  | 2 | 0.788929062761185    |
|            | 0.115663051958981  |   |                      |
| LARS2      | 1.10032311360454   | 2 | 0.576856607743013    |
|            | 0.593319377609853  |   |                      |
| LIMD1      | 1.35321123542348   | 2 | 0.508339565994182    |
|            | 1.14590799711024   |   |                      |
| SACM1L     | 2.74103439796289   | 2 | 0.253975569672426    |
|            | 0.476152206406774  |   |                      |
| LZTFL1     | 0.0300645586184846 | 2 | 0.985080141383341    |

|                              |   |                                   |  |
|------------------------------|---|-----------------------------------|--|
| 0.0942254783833484           |   |                                   |  |
| CCRL2 0.514912950777227      | 2 | 0.773015270770553                 |  |
| 0.61558862786596             |   |                                   |  |
| LRR2 14.6364687558017 2      |   | 0.000663332372172643              |  |
| 7.08209326546204             |   |                                   |  |
| CCDC12 0.167095628396557     | 2 | 0.919847103867933                 |  |
| 0.0429900807500146           |   |                                   |  |
| SETD2 2.07944672308738 2     |   | 0.353552474642358                 |  |
| 0.315478422815264            |   |                                   |  |
| KIF9-AS1 4.52140083547928 2  |   | 0.10427742141452 1.46855117439889 |  |
| KIF9 1.63720171350536 2      |   | 0.441048312777337                 |  |
| 0.646815402437304            |   |                                   |  |
| KLHL18 0.581538006013568     | 2 | 0.747688371837204                 |  |
| 0.188562886463795            |   |                                   |  |
| AC099778.1 0.766861878292992 | 2 | 0.681519142717251                 |  |
| 0.710159261125039            |   |                                   |  |
| PTPN23 6.50733847120092 2    |   | 0.0386321968232182                |  |
| 2.74486499101442             |   |                                   |  |
| SCAP 1.88357840557658 2      |   | 0.3899295478216 0.590471301059006 |  |
| ELP6 6.89477446050087 2      |   | 0.0318286888677467                |  |
| 0.419119870227307            |   |                                   |  |
| SMARCC1 0.462459669033954    | 2 | 0.793557058271064                 |  |
| 0.035692738015106            |   |                                   |  |
| DHX30 0.579749365430974      | 2 | 0.748357343812723                 |  |
| 0.189037879685727            |   |                                   |  |
| MAP4 1.01251266407121 2      |   | 0.602747848117175                 |  |
| 0.173698733101693            |   |                                   |  |
| CAMP 0.283580403192858       | 2 | 0.8678033011361                   |  |
| 0.199237429045259            |   |                                   |  |
| ZNF589 4.82942278709021 2    |   | 0.0893931346348482                |  |
| 1.78685960594326             |   |                                   |  |
| NME6 0.0160804089405797      | 2 | 0.991992031521163                 |  |
| 0.0280536751004676           |   |                                   |  |
| CCDC51 0.380530951000056     | 2 | 0.826739625692097                 |  |
| 0.18936322408799             |   |                                   |  |
| TMA7 22.2780945690076 2      |   | 1.45336009201857e-05              |  |
| 0.230082224350084            |   |                                   |  |
| ATRIP 0.00745334724168256    | 2 | 0.996280261809261                 |  |
| 0.0561272751132991           |   |                                   |  |
| SHISA5 1.15276206776336 2    |   | 0.561928290681525                 |  |
| 0.146228021251384            |   |                                   |  |
| UQCRC1 0.939304095334424     | 2 | 0.625219777119107                 |  |
| 0.113377428111668            |   |                                   |  |
| SLC26A6 1.00840257857164 2   |   | 0.603987794347275                 |  |
| 0.915679792831019            |   |                                   |  |
| NCKIPSD 1.96221254577524 2   |   | 0.374896131933964                 |  |
| 1.38572646276719             |   |                                   |  |
| IP6K2 7.52010285151292 2     |   | 0.0232825430217227                |  |
| 0.367118388294308            |   |                                   |  |
| PRKAR2A 7.55304281211359 2   |   | 0.0229022205458148                |  |

|                             |   |                      |
|-----------------------------|---|----------------------|
| 0.80310251080308            |   |                      |
| SLC25A20 7.37429949635873 2 |   | 0.0250432800684691   |
| 0.859227896269257           |   |                      |
| ARIH20S 2.44992096975619 2  |   | 0.293769308424218    |
| 1.00288873680718            |   |                      |
| ARIH2 1.9726544756111 2     |   | 0.372943913048964    |
| 0.248300421034134           |   |                      |
| P4HTM 0.601301802578597     | 2 | 0.740336178044846    |
| 0.286605022976089           |   |                      |
| WDR6 0.77772546096873 2     |   | 0.677827308654484    |
| 0.125787679798642           |   |                      |
| DALRD3 2.60969897373184 2   |   | 0.271213353145479    |
| 0.319337361331121           |   |                      |
| NDUF3F3 19.9567272288548 2  |   | 4.63929238113669e-05 |
| 0.263545533355535           |   |                      |
| IMPDH2 20.235306691436 2    |   | 4.0360727163069e-05  |
| 0.444641216468762           |   |                      |
| QRICH1 0.028641373380323    | 2 | 0.985781366604909    |
| 0.0464147133077703          |   |                      |
| QARS 0.418600204579179      | 2 | 0.811151770609467    |
| 0.0698120872370289          |   |                      |
| USP19 0.000221804533592065  | 2 | 0.999889103882633    |
| 0.00807486318040697         |   |                      |
| CCDC71 0.701445446700108    | 2 | 0.704178979176967    |
| 0.229480101463288           |   |                      |
| C3orf62 2.05531463167343 2  |   | 0.357844295544595    |
| 0.708032224925824           |   |                      |
| USP4 1.97863783682767 2     |   | 0.371829851265753    |
| 0.290428524425113           |   |                      |
| RHOA 4.0701220398295 2      |   | 0.130672508635408    |
| 0.104092766440396           |   |                      |
| TCTA 0.507937522900576      | 2 | 0.775716033911878    |
| 0.198960877957527           |   |                      |
| AMT 0.72683080664615 2      |   | 0.695297544589994    |
| 0.840386236639348           |   |                      |
| DAG1 0.489165151660658      | 2 | 0.783031326233699    |
| 0.711084058905484           |   |                      |
| APEH 7.72181512254761 2     |   | 0.0210488876964465   |
| 0.566024592874962           |   |                      |
| RNF123 1.33395549230712 2   |   | 0.513257430337868    |
| 0.275847118492754           |   |                      |
| GMPPB 18.4859399243257 2    |   | 9.67897011748819e-05 |
| 0.981172857566772           |   |                      |
| IP6K1 0.00398761365185545   | 2 | 0.998008179486575    |
| 0.0250970815864007          |   |                      |
| INKA1 19.3582664842306 2    |   | 6.25757182731723e-05 |
| 1.12936097089204            |   |                      |
| UBA7 0.789043850834445      | 2 | 0.674002185551401    |
| 0.154658642969715           |   |                      |
| MON1A 0.0567277750160494    | 2 | 0.972034591192785    |

|                    |                       |                    |
|--------------------|-----------------------|--------------------|
| 0.10579711831868   |                       |                    |
| RBM6               | 5.6991137441263 2     | 0.0578699589894692 |
| 0.219517529729174  |                       |                    |
| RBM5               | 1.36405769642909 2    | 0.505590185355171  |
| 0.177002912701886  |                       |                    |
| GNAI2              | 1.55320583349577 2    | 0.459965902729296  |
| 0.156959964637352  |                       |                    |
| IFRD2              | 0.981505519283457 2   | 0.61216540728735   |
| 0.167691941927724  |                       |                    |
| HYAL3              | 1.33971365402916 2    | 0.511781845876168  |
| 0.76561240822486   |                       |                    |
| NAA80              | 3.85519576368327 2    | 0.145497280707374  |
| 1.37299790996121   |                       |                    |
| HYAL2              | 0.299602076561959 2   | 0.860879241400644  |
| 0.477918160611681  |                       |                    |
| TUSC2              | 7.34587643048097 2    | 0.0254017244573517 |
| 0.430450306892346  |                       |                    |
| RASSF1             | 4.12503386113524 2    | 0.127133580470133  |
| 0.471426612520489  |                       |                    |
| RASSF1-AS1         | 1.06752140377881 2    | 0.586395558928315  |
| 0.641219425607439  |                       |                    |
| NPRL2              | 1.45694184618501 2    | 0.482646429655687  |
| 0.171289808692873  |                       |                    |
| CYB561D2           | 1.32804295222104 2    | 0.514777002930315  |
| 0.263082651787394  |                       |                    |
| TMEM115            | 1.0959887507421 2     | 0.578108116305022  |
| 0.334757338204785  |                       |                    |
| CYB561D2.1         | 1.25316930086738 2    | 0.534413897961338  |
| 0.683282770553725  |                       |                    |
| HEMK1              | 0.764095178108249 2   | 0.682462574684181  |
| 0.292769563028946  |                       |                    |
| MAPKAPK3           | 1.92791744692351 2    | 0.381380115220217  |
| 0.66660228330473   |                       |                    |
| MANF               | 4.67709598631327 2    | 0.0964676082145044 |
| 0.377478831277916  |                       |                    |
| RBM15B             | 0.299174997241069 2   | 0.861063092890631  |
| 0.156257842404273  |                       |                    |
| DCAF1              | 0.0505109977535816 2  | 0.975060753272533  |
| 0.103729343175198  |                       |                    |
| RAD54L2            | 5.23369943084956 2    | 0.0730325742013549 |
| 0.652514256295879  |                       |                    |
| TEX264             | 0.958721343571188 2   | 0.61917912397502   |
| 0.164385596915643  |                       |                    |
| RRP9               | 0.00195062867493192 2 | 0.999025161126974  |
| 0.0127744230946371 |                       |                    |
| PARP3              | 0.611733054573609 2   | 0.736484913535803  |
| 0.47421196502916   |                       |                    |
| PCBP4              | 0.0468130272737057 2  | 0.976865293983841  |
| 0.178605657256338  |                       |                    |
| ABHD14B            | 1.08439372568768 2    | 0.581469439593494  |

|                            |   |                      |
|----------------------------|---|----------------------|
| 0.181701997158374          |   |                      |
| ABHD14A 4.2198614636967 2  |   | 0.121246364654088    |
| 0.775439758122407          |   |                      |
| RPL29 33.1892260510722 2   |   | 6.2094213992836e-08  |
| 0.194351206364248          |   |                      |
| POC1A 0.27229877143425 2   |   | 0.872712252004861    |
| 0.385817110996754          |   |                      |
| ALAS1 8.57910894130934 2   |   | 0.0137110326041516   |
| 0.661888395956488          |   |                      |
| TWF2 6.30679156538526 2    |   | 0.0427068571480775   |
| 0.142125562932305          |   |                      |
| PPM1M 3.06911014062627 2   |   | 0.215551575132176    |
| 0.65521173617684           |   |                      |
| WDR82 0.0015885966449747   | 2 | 0.99920601704892     |
| 0.0111571695749173         |   |                      |
| GLYCTK 2.36515860814853 2  |   | 0.306487194553948    |
| 0.563545647436612          |   |                      |
| BAP1 1.9330235666591 2     |   | 0.380407670836248    |
| 0.42153222422918           |   |                      |
| PHF7 0.341210338034988     | 2 | 0.843154411244559    |
| 0.236362998835881          |   |                      |
| NISCH 1.10704380830679 2   |   | 0.574921422437611    |
| 0.419882861725951          |   |                      |
| NT5DC2 1.62256015824939 2  |   | 0.444288977016233    |
| 2.06271384632948           |   |                      |
| SMIM4 0.113378197000427    | 2 | 0.94488779073622     |
| 0.070497467474508          |   |                      |
| PBRM1 1.06463058317545 2   |   | 0.587243753957293    |
| 0.139238894994886          |   |                      |
| GNL3 9.35966996173511 2    |   | 0.00928054522823307  |
| 0.328627923504571          |   |                      |
| GLT8D1 3.49220865833264 2  |   | 0.174452229866082    |
| 0.611524611093784          |   |                      |
| SPCS1 54.9575540838982 2   |   | 1.16440190822686e-12 |
| 0.336113921357359          |   |                      |
| NEK4 0.0266822128975276    | 2 | 0.986747491675232    |
| 0.0830988393837951         |   |                      |
| STIMATE 1.28673876679173 2 |   | 0.525518763453975    |
| 0.948194878000548          |   |                      |
| SFMBT1 5.14425850404754 2  |   | 0.0763727553309983   |
| 0.587231129490942          |   |                      |
| RFT1 0.330778826595196     | 2 | 0.847563587284702    |
| 0.172791090768551          |   |                      |
| PRKCD 68.6488244854253 2   |   | 1.22124532708767e-15 |
| 1.05704336547563           |   |                      |
| TKT 9.25798042572134 2     |   | 0.0097646143076241   |
| 0.260861224423507          |   |                      |
| DCP1A 0.58144123421644 2   |   | 0.747724550286177    |
| 0.105784891818298          |   |                      |
| CACNA1D 5.23180933170224 2 |   | 0.073101626228122    |



|                             |   |                      |
|-----------------------------|---|----------------------|
| 2.4041736971944             |   |                      |
| CHDH 0.236699531411502      | 2 | 0.888385271566021    |
| 0.186334902739088           |   |                      |
| IL17RB 2.7719166917737 2    |   | 0.250084017923121    |
| 1.53183519218632            |   |                      |
| ACTR8 0.701135476362817     | 2 | 0.70428812493258     |
| 0.213692392424539           |   |                      |
| SELENOK 20.7669058327672 2  |   | 3.09402412226323e-05 |
| 0.267684319002179           |   |                      |
| CCDC66 6.93233417951517 2   |   | 0.0312365283121837   |
| 0.46828040181077            |   |                      |
| FAM208A 0.982866981290171   | 2 | 0.61174882912035     |
| 0.288765688644897           |   |                      |
| APPL1 2.61578181243397 2    |   | 0.270389732727383    |
| 0.284701076790931           |   |                      |
| PDE12 1.40055948252707 2    |   | 0.496446407819447    |
| 0.294742050977994           |   |                      |
| ARF4 6.68545806723845 2     |   | 0.0353403809132307   |
| 0.28752537343109            |   |                      |
| ARF4-AS1 2.40919583039757 2 |   | 0.299812525340474    |
| 1.18940068438915            |   |                      |
| DENND6A 1.49174423553342 2  |   | 0.474320456208933    |
| 0.419449436694527           |   |                      |
| SLMAP 4.73051668014973 2    |   | 0.0939250326339878   |
| 0.382052259539132           |   |                      |
| FLNB 0.49619914768846 2     |   | 0.780282243707086    |
| 0.645492748642381           |   |                      |
| ABHD6 4.43119288808155 2    |   | 0.109088429696937    |
| 1.1080618965047             |   |                      |
| RPP14 0.0364178386524018    | 2 | 0.981955861370038    |
| 0.0823889008605197          |   |                      |
| PXK 14.8232208056305 2      |   | 0.000604196910247823 |
| 0.476159384522751           |   |                      |
| PDHB 7.28528018277687 2     |   | 0.0261831267884988   |
| 0.13514094488188            |   |                      |
| KCTD6 2.16189136498536 2    |   | 0.339274527906637    |
| 0.584387123825803           |   |                      |
| C3orf67 31.3222694839806 2  |   | 1.57926714816625e-07 |
| 1.36868871809028            |   |                      |
| FHIT 0.0188030634406566     | 2 | 0.99064252450558     |
| 0.0720901579499128          |   |                      |
| C3orf14 0.0260229680238019  | 2 | 0.987072799399423    |
| 0.0703518033694491          |   |                      |
| CADPS 5.79992822041127 2    |   | 0.0550251948638978   |
| 1.00707400487443            |   |                      |
| THOC7 0.438957149596809     | 2 | 0.802937360603562    |
| 0.065745078537463           |   |                      |
| ATXN7 0.230739881769596     | 2 | 0.891036452113872    |
| 0.299695698794275           |   |                      |
| ATXN7.1 0.132048442910938   | 2 | 0.936108190114178    |



|                    |                    |                      |
|--------------------|--------------------|----------------------|
| 0.756214720925531  |                    |                      |
| ARL6               | 1.85729323787115 2 | 0.395088053395421    |
| 0.671059256762332  |                    |                      |
| RIOX2              | 0.445409847010956  | 2 0.800350979215981  |
| 0.27760182952734   |                    |                      |
| CLDND1             | 2.44514889967107 2 | 0.294471089192353    |
| 0.290765046762151  |                    |                      |
| CPOX               | 1.46621820106133 2 | 0.480413013369461    |
| 0.672982494402395  |                    |                      |
| CMSS1              | 2.97309585720496 2 | 0.226152002444045    |
| 0.193247953583446  |                    |                      |
| TBC1D23            | 0.698741158487484  | 2 0.705131774646674  |
| 0.127900422921034  |                    |                      |
| NIT2               | 4.51223075886144 2 | 0.104756635153611    |
| 0.528133863381471  |                    |                      |
| TOMM70             | 0.0289414380413921 | 2 0.985633478623346  |
| 0.0661568703992733 |                    |                      |
| TFG                | 1.18205590282347 2 | 0.553757755993689    |
| 0.223839109185071  |                    |                      |
| SENP7              | 0.451767158822554  | 2 0.797810977882952  |
| 0.263047009383559  |                    |                      |
| TRMT10C            | 0.0676151737545412 | 2 0.966757503572799  |
| 0.0397807127324931 |                    |                      |
| PCNP               | 5.83399818544791 2 | 0.0540957803865172   |
| 0.227771016137152  |                    |                      |
| ZBTB11             | 0.425056488594217  | 2 0.808537479426156  |
| 0.272513732941977  |                    |                      |
| ZBTB11-AS1         | 1.24622085649603 2 | 0.536273799566893    |
| 0.707482914025899  |                    |                      |
| RPL24              | 43.0846209705831 2 | 4.40852576666373e-10 |
| 0.189152124222192  |                    |                      |
| CEP97              | 0.0762940503950788 | 2 0.96257140823558   |
| 0.146144860283436  |                    |                      |
| NXPE3              | 1.72325495865431 2 | 0.422473954885213    |
| 0.330800504406822  |                    |                      |
| NFKBIZ             | 4.58292394922434 2 | 0.101118521026806    |
| 0.70955176423034   |                    |                      |
| ALCAM              | 13.3882169264419 2 | 0.00123818527003716  |
| 1.48119901813741   |                    |                      |
| CBLB               | 0.61858326294249 2 | 0.733966691025745    |
| 0.272105990865093  |                    |                      |
| DUBR               | 1.09430778405382 2 | 0.578594210796437    |
| 0.484997600649005  |                    |                      |
| BBX                | 12.0490015469851 2 | 0.00241875877449993  |
| 0.443852275025339  |                    |                      |
| CD47               | 0.765449605288455  | 2 0.682000558213442  |
| 0.0459916570522766 |                    |                      |
| LINC01215          | 3.80830002144711 2 | 0.14894919404852     |
| 0.506629280258805  |                    |                      |
| IFT57              | 54.5394099329926 2 | 1.43518530393294e-12 |

|                               |   |                                    |
|-------------------------------|---|------------------------------------|
| 0.888063457846023             |   |                                    |
| CIP2A 1.00890699064783 2      |   | 0.603835484186182                  |
| 0.630815931396745             |   |                                    |
| DZIP3 0.753606232356216       | 2 | 0.686051132969183                  |
| 0.284644520604165             |   |                                    |
| CD96 0.0481074389959641       | 2 | 0.976233265588344                  |
| 0.143640271793794             |   |                                    |
| ZBED2 32.2460178187642 2      |   | 9.95098792255789e-08               |
| 1.80524125758392              |   |                                    |
| ABHD10 0.804809834931761      | 2 | 0.668709918537102                  |
| 0.445522843772263             |   |                                    |
| C3orf52 3.32478665356663 2    |   | 0.189684459512999                  |
| 1.23219634363443              |   |                                    |
| GCSAM 0.00337135756926296     | 2 | 0.998315741173874                  |
| 0.000526473676038933          |   |                                    |
| CD200 0.259191127625575       | 2 | 0.878450636312767                  |
| 0.47413739363463              |   |                                    |
| BTLA 4.76947210425605 2       |   | 0.0921132894776054                 |
| 0.528102389674198             |   |                                    |
| ATG3 0.229619833570708        | 2 | 0.891535593753167                  |
| 0.0651071874857882            |   |                                    |
| SLC35A5 2.39414372521247 2    |   | 0.302077442425968                  |
| 0.545619164021077             |   |                                    |
| GTPBP8 11.3755142210698 2     |   | 0.00338718152981399                |
| 0.427718431243892             |   |                                    |
| NEPRO 0.1173215622502 2       |   | 0.9430266073312 0.0843671053299564 |
| SPICE1 0.164286337708374      | 2 | 0.92114007068698                   |
| 0.278099451983599             |   |                                    |
| SIDT1 0.722902060480515       | 2 | 0.696664710743701                  |
| 0.654051783333955             |   |                                    |
| USF3 2.4715836012538 2        |   | 0.290604570365797                  |
| 0.531894550664673             |   |                                    |
| NAA50 22.5932139014422 2      |   | 1.2414977507591e-05                |
| 0.596579391591562             |   |                                    |
| ATP6V1A 0.562415034863249     | 2 | 0.754871670195176                  |
| 0.146144021415931             |   |                                    |
| GRAMD1C 12.8308432923619 2    |   | 0.0016361298947557                 |
| 1.51532217436072              |   |                                    |
| ZDHC23 1.8764708058456 2      |   | 0.391317744621982                  |
| 1.25378726881046              |   |                                    |
| CCDC191 0.120080212343469     | 2 | 0.941726763771538                  |
| 0.132927426784467             |   |                                    |
| QTRT2 2.018019127642 2        |   | 0.364579893927785                  |
| 0.345183659040344             |   |                                    |
| AC093010.2 7.62765779013616 2 |   | 0.0220635380478477                 |
| 1.00192274982278              |   |                                    |
| TIGIT 2.84930860171513 2      |   | 0.240591621150808                  |
| 3.06524871551277              |   |                                    |
| ZBTB20 4.66676377504586 2     |   | 0.0969672595833962                 |
| 0.348448202007117             |   |                                    |

|                     |                     |   |                      |
|---------------------|---------------------|---|----------------------|
| ZBTB20-AS5          | 2.28385794125705    | 2 | 0.319202694946101    |
| 1.24866371006981    |                     |   |                      |
| LSAMP               | 3.34053496480337    | 2 | 0.18819671959516     |
| B4GALT4             | 2.81733632898155    | 2 | 3.91322620783522     |
| 0.283273682577631   |                     |   | 0.244468658472386    |
| TMEM39A             | 1.27784266511659    | 2 | 0.527861504081997    |
| 0.412090013055866   |                     |   |                      |
| POGLUT1             | 0.042079692856642   | 2 | 0.979179946968538    |
| 0.0779896568119661  |                     |   |                      |
| TIMMDC1             | 0.584895625939905   | 2 | 0.746434198203378    |
| 0.125496629585851   |                     |   |                      |
| CD80                | 1.54115912236596    | 2 | 0.462744801655601    |
| 0.543691911792408   |                     |   |                      |
| ADPRH               | 0.335337721650512   | 2 | 0.845633810808816    |
| 0.243615620479132   |                     |   |                      |
| COX17               | 10.9058449641845    | 2 | 0.00428376714652845  |
| 0.135475595380196   |                     |   |                      |
| GSK3B               | 0.0027597145366953  | 2 | 0.998621094296968    |
| 0.0139592381286753  |                     |   |                      |
| LRRC58              | 0.00399913705072011 | 2 | 0.998002429279979    |
| 0.0167068202249029  |                     |   |                      |
| NDUFB4              | 1.35290147467008    | 2 | 0.508418303914975    |
| 0.0451721557485096  |                     |   |                      |
| RABL3               | 3.77700999408738    | 2 | 0.151297830546662    |
| 0.701370240961084   |                     |   |                      |
| GTF2E1              | 0.0111481892889446  | 2 | 0.994441411796246    |
| 0.040496924816245   |                     |   |                      |
| POLQ                | 0.72054180792541    | 2 | 0.69748734838817     |
| HCLS1               | 15.3728689822155    | 2 | 0.647782986016577    |
| 0.378342085260891   |                     |   | 0.000459011868422787 |
| GOLGB1              | 0.0017627696967225  | 2 | 0.999119003457174    |
| 0.00261724100479377 |                     |   |                      |
| IQCB1               | 0.0294948339801728  | 2 | 0.985360793568688    |
| 0.0301434577540352  |                     |   |                      |
| EAF2                | 2.13683986965996    | 2 | 0.343550921634258    |
| 0.0667109193879532  |                     |   |                      |
| SLC15A2             | 2.34506380029373    | 2 | 0.309582117128747    |
| 0.473316560051774   |                     |   |                      |
| ILDR1               | 0.70181361713095    | 2 | 0.704049362168544    |
| 0.625717523001064   |                     |   |                      |
| CD86                | 8.67038275867454    | 2 | 0.0130993668849342   |
| 0.540228011492539   |                     |   |                      |
| CCDC58              | 0.0621041226399209  | 2 | 0.969425102211824    |
| 0.0596902316597769  |                     |   |                      |
| FAM162A             | 5.5984147756943     | 2 | 0.0608582805263931   |
| 0.813442406392193   |                     |   |                      |
| WDR5B               | 1.13182230639999    | 2 | 0.567842519445774    |
| 0.51952620281625    |                     |   |                      |
| AC083798.2          | 1.44793763692252    | 2 | 0.484824253097881    |
| 0.768284796936731   |                     |   |                      |

|          |                    |   |                     |
|----------|--------------------|---|---------------------|
| KPNA1    | 0.857179204867425  | 2 | 0.651427218474919   |
|          | 0.200065297342267  |   |                     |
| PARP9    | 7.17827783243991   | 2 | 0.0276221051324723  |
|          | 1.34027295492039   |   |                     |
| DTX3L    | 0.167315981806595  | 2 | 0.919745763727672   |
|          | 0.29161986581091   |   |                     |
| PARP15   | 4.54523545386395   | 2 | 0.103042090671291   |
|          | 1.64900793053692   |   |                     |
| PARP14   | 7.64601709837681   | 2 | 0.0218619291655314  |
|          | 0.684362721207818  |   |                     |
| HSPBAP1  | 1.29777793569252   | 2 | 0.522626108728763   |
|          | 0.46989137058758   |   |                     |
| DIRC2    | 0.0978269754055926 | 2 | 0.952263508638733   |
|          | 0.243986291159158  |   |                     |
| PDIA5    | 0.0619342015809641 | 2 | 0.969507468580693   |
|          | 0.137675025806932  |   |                     |
| SEC22A   | 2.5749516491505    | 2 | 0.275966492512502   |
|          | 0.343147604427866  |   |                     |
| HACD2    | 12.3018594119528   | 2 | 0.00213149918104083 |
|          | 0.808550257619378  |   |                     |
| MYLK-AS1 | 0.0475906503148362 | 2 | 0.976485551332443   |
|          | 0.10931036355167   |   |                     |
| CCDC14   | 3.39364981309435   | 2 | 0.183264483125503   |
|          | 0.705083363514007  |   |                     |
| UMPS     | 0.176808423535511  | 2 | 0.915390790202206   |
|          | 0.0984673557899582 |   |                     |
| HEG1     | 0.82612521652798   | 2 | 0.661620858597736   |
|          | 0.953021886138294  |   |                     |
| SLC12A8  | 6.25334167538757   | 2 | 0.0438635834337552  |
|          | 0.796965631203089  |   |                     |
| ZNF148   | 3.24865923306619   | 2 | 0.197043725793012   |
|          | 0.297218357952054  |   |                     |
| SNX4     | 5.52668105160652   | 2 | 0.0630806933213912  |
|          | 0.490564359863034  |   |                     |
| OSBPL11  | 0.0602609125563682 | 2 | 0.970318941093591   |
|          | 0.0714670474704838 |   |                     |
| ALG1L    | 1.02887018335969   | 2 | 0.597838223031007   |
|          | 0.54025309021401   |   |                     |
| SLC41A3  | 0.642793361549131  | 2 | 0.725135546600224   |
|          | 0.224813100576153  |   |                     |
| ZXDC     | 6.5925485103386    | 2 | 0.0370208409805823  |
|          | 0.934895723411965  |   |                     |
| CHCHD6   | 6.14318801015215   | 2 | 0.0463472182442747  |
|          | 1.68400987011337   |   |                     |
| TPRA1    | 0.260746421571976  | 2 | 0.877767777380336   |
|          | 0.14863236853639   |   |                     |
| MCM2     | 12.7068440653612   | 2 | 0.00174077992629296 |
|          | 1.28908935780565   |   |                     |
| PODXL2   | 0.286260962531553  | 2 | 0.866640981105542   |
|          | 0.328432434132965  |   |                     |

|         |                     |   |                      |
|---------|---------------------|---|----------------------|
| ABTB1   | 4.93706876233936    | 2 | 0.0847089190538447   |
|         | 0.480730073988254   |   |                      |
| MGLL    | 14.0032201250223    | 2 | 0.000910414959889527 |
|         | 3.13076443169447    |   |                      |
| SEC61A1 | 4.81191820979382    | 2 | 0.0901789630344645   |
|         | 0.669597406185727   |   |                      |
| RUVBL1  | 2.15819599523263    | 2 | 0.339901979808975    |
|         | 0.248473367739543   |   |                      |
| EEFSEC  | 0.229159852970172   | 2 | 0.89174066187301     |
|         | 0.153426867576579   |   |                      |
| RPN1    | 0.78348970655272    | 2 | 0.675876539647442    |
|         | 0.105039075442833   |   |                      |
| RAB7A   | 7.46559902557715    | 2 | 0.023925761517464    |
|         | 0.244008750410183   |   |                      |
| ACAD9   | 0.00172409648840794 | 2 | 0.999138323212638    |
|         | 0.0124551930610424  |   |                      |
| ISY1    | 3.41617063411269    | 2 | 0.181212425005001    |
|         | 0.281819135174976   |   |                      |
| CNBP    | 5.46182503805717    | 2 | 0.0651598029707742   |
|         | 0.185857295785166   |   |                      |
| COPG1   | 2.6503199316276     | 2 | 0.265760443102908    |
|         | 0.233749188467461   |   |                      |
| HMCES   | 130.918142497174    | 2 | 0.854020115434918    |
| H1FX    | 9.2962341689287     | 2 | 0.00957962257972023  |
|         | 0.601253004800114   |   |                      |
| EFCAB12 | 1.87707654165007    | 2 | 0.391199244983336    |
|         | 1.91122862606035    |   |                      |
| MBD4    | 29.8714091205968    | 2 | 3.26216501700394e-07 |
|         | 0.286489179797702   |   |                      |
| IFT122  | 3.41858238319479    | 2 | 0.180994037255743    |
|         | 1.79739238487472    |   |                      |
| TMCC1   | 0.368363862878287   | 2 | 0.831784462315914    |
|         | 0.200527172098855   |   |                      |
| PIK3R4  | 1.3773205217905     | 2 | 0.502248500480543    |
|         | 1.00065566330815    |   |                      |
| ATP2C1  | 0.420307464274874   | 2 | 0.81045964269949     |
|         | 0.113928573433081   |   |                      |
| ASTE1   | 0.460588707500805   | 2 | 0.794299762975076    |
|         | 0.326426457344665   |   |                      |
| NUDT16  | 0.334467854392962   | 2 | 0.846001685385479    |
|         | 0.166410175787685   |   |                      |
| MRPL3   | 9.11572860281542    | 2 | 0.0104844266247955   |
|         | 0.456994027151632   |   |                      |
| DNAJC13 | 0.178471913431278   | 2 | 0.914629735082867    |
|         | 0.211392064961872   |   |                      |
| ACKR4   | 0.497842718262669   | 2 | 0.779641282641677    |
|         | 0.501434641549748   |   |                      |
| UBA5    | 5.09730205939512    | 2 | 0.0781870669251284   |
|         | 0.725240032511002   |   |                      |
| NPHP3   | 1.24286637440085    | 2 | 0.537174014724144    |

|                                |   |                      |
|--------------------------------|---|----------------------|
| 0.655358354429015              |   |                      |
| BFSP2 10.3766126262784 2       |   | 0.00558145204602467  |
| 0.504412404812172              |   |                      |
| BFSP2-AS1 3.07774181425401 2   |   | 0.2146232943041      |
| 0.988137832466523              |   |                      |
| CDV3 1.01656856936678 2        |   | 0.601526742613202    |
| 0.103317582062402              |   |                      |
| TOPBP1 0.673712552646995       | 2 | 0.714011452879659    |
| 0.25294898394091               |   |                      |
| SRPRB 10.2211138651389 2       |   | 0.00603272216837147  |
| 0.431167822621902              |   |                      |
| RYK 2.44483223070794 2         |   | 0.294517717810958    |
| 0.450307875811254              |   |                      |
| ANAPC13 4.22640008227177 2     |   | 0.120850620046294    |
| 0.349081015203225              |   |                      |
| CEP63 0.0224119120545998       | 2 | 0.988856596825075    |
| 0.0316737130924506             |   |                      |
| MSL2 3.8153489394936 2         |   | 0.148425152741069    |
| 0.740649998946842              |   |                      |
| PCCB 0.24583365503643 2        |   | 0.884337212022791    |
| 0.0654381167827477             |   |                      |
| STAG1 1.53389469368919 2       |   | 0.464428646150002    |
| 0.312180489120494              |   |                      |
| SLC35G2 0.0931305770920805     | 2 | 0.954502240472126    |
| 0.250834723759256              |   |                      |
| AC096992.2 0.00105436902078924 | 2 | 0.999472954426943    |
| 0.0256544316136274             |   |                      |
| NCK1-DT 0.143964436409923      | 2 | 0.930547442467986    |
| 0.127619412888773              |   |                      |
| NCK1 9.26519491964903 2        |   | 0.00972945438569639  |
| 0.486545980026919              |   |                      |
| DBR1 5.05105900979837 2        |   | 0.0800159327390912   |
| 1.15016843446498               |   |                      |
| ARMC8 1.38475357227612 2       |   | 0.500385345625943    |
| 0.295416186681397              |   |                      |
| FAIM 0.062587922402823         | 2 | 0.969190626755459    |
| 0.0894347785204164             |   |                      |
| PIK3CB 0.405350795880755       | 2 | 0.816543250032845    |
| 0.598715146304199              |   |                      |
| MRPS22 2.82163262819463 2      |   | 0.243944066872226    |
| 0.344179023410045              |   |                      |
| COPB2 4.83941097895507 2       |   | 0.0889478096681542   |
| 0.172700443369159              |   |                      |
| NMNAT3 16.0786809338918 2      |   | 0.000322521593640213 |
| 3.55564453948642               |   |                      |
| SLC25A36 0.166556142570442     | 2 | 0.920095259572915    |
| 0.0891694071598569             |   |                      |
| ZBTB38 48.0847329458701 2      |   | 3.61853880193053e-11 |
| 0.592727943876489              |   |                      |
| RASA2 0.395822863557259        | 2 | 0.82044251505431     |



|                    |                    |                                   |
|--------------------|--------------------|-----------------------------------|
| 0.218186977635635  |                    |                                   |
| RNF7               | 6.47855337257904 2 | 0.0391922331286751                |
| 0.281374871029788  |                    |                                   |
| ATP1B3             | 0.445693028666837  | 2 0.800237664880515               |
| 0.0867185386496466 |                    |                                   |
| TFDP2              | 1.02114337178907 2 | 0.600152382069844                 |
| 0.280059893425122  |                    |                                   |
| GK5                | 0.889660889555359  | 2 0.640932940346951               |
| 0.928919167699888  |                    |                                   |
| XRN1               | 0.0386649783371729 | 2 0.980853184960631               |
| 0.0527587223705654 |                    |                                   |
| ATR                | 0.235706168118811  | 2 0.888826625822498               |
| 0.231854497410124  |                    |                                   |
| PLS1               | 0.964858148948484  | 2 0.617282144922426               |
| 1.22982753100752   |                    |                                   |
| U2SURP             | 2.37091105657031 2 | 0.305606935183142                 |
| 0.139282335857859  |                    |                                   |
| AC026304.1         | 0.508710014290279  | 2 0.775416474788787               |
| 0.568956488241946  |                    |                                   |
| CHST2              | 71.9409545664792 2 | 2.22044604925031e-16              |
| 1.5845176964625    |                    |                                   |
| C3orf58            | 0.0656902697780434 | 2 0.967688409158374               |
| 0.1233079420325    |                    |                                   |
| PLSCR1             | 0.261039987844897  | 2 0.877638945328306               |
| 0.159522625944136  |                    |                                   |
| GYG1               | 0.0984015789769858 | 2 0.951989960929502               |
| 0.0598535544853399 |                    |                                   |
| HLTF               | 3.78754326313845 2 | 0.150503094797029                 |
| 0.611153935331169  |                    |                                   |
| HPS3               | 2.84476178731968 2 | 0.24113920607996 0.50569131947274 |
| COMMD2             | 4.3906765639166 2  | 0.111320897283576                 |
| 0.345932269283776  |                    |                                   |
| RNF13              | 13.97353696487 2   | 0.000924027724008014              |
| 0.608678545097564  |                    |                                   |
| PFN2               | 0.208501805712674  | 2 0.900999205784584               |
| 0.201114602050584  |                    |                                   |
| TSC22D2            | 0.704627654633063  | 2 0.703059448091449               |
| 0.151276700395503  |                    |                                   |
| SERP1              | 2.64774220075114 2 | 0.266103193384922                 |
| 0.127382295124992  |                    |                                   |
| EIF2A              | 3.80654404386688 2 | 0.149080027197806                 |
| 0.255801745732439  |                    |                                   |
| SELENOT            | 6.17994994997438 2 | 0.0455030931058614                |
| 0.113598517558215  |                    |                                   |
| ERICH6-AS1         | 1.88618497201767 2 | 0.389421690197775                 |
| 1.16299072058447   |                    |                                   |
| SIAH2              | 28.8804235958375 2 | 5.35421367131583e-07              |
| 0.681666238159954  |                    |                                   |
| MED12L             | 9.7283376942646 2  | 0.00771824056404113               |
| 1.08299410181572   |                    |                                   |

|            |                    |   |                      |
|------------|--------------------|---|----------------------|
| P2RY12     | 1.48264166293135   | 2 | 0.476484144450984    |
|            | 1.63018335915616   |   |                      |
| IGSF10     | 10.9285945054233   | 2 | 0.00423531635855046  |
|            | 1.42120334707424   |   |                      |
| MBNL1      | 1.49425332663324   | 2 | 0.473725772698139    |
|            | 0.152368961844829  |   |                      |
| MBNL1-AS1  | 1.05844668037721   | 2 | 0.589062293072454    |
|            | 0.951110922252046  |   |                      |
| RAP2B      | 0.915214715848073  | 2 | 0.632795889727175    |
|            | 0.221775453490456  |   |                      |
| ARHGEF26   | 1.26412844057145   | 2 | 0.531493548115168    |
|            | 0.418320910572013  |   |                      |
| DHX36      | 2.22727225106645   | 2 | 0.328362819300833    |
|            | 0.213003814418154  |   |                      |
| MME        | 10.6510061371688   | 2 | 0.00486590251570962  |
|            | 0.506222559715778  |   |                      |
| SLC33A1    | 1.70234921040483   | 2 | 0.42691318288229     |
|            | 0.418045105553053  |   |                      |
| GMPS       | 0.860107944634006  | 2 | 0.650473986187696    |
|            | 0.196759409927213  |   |                      |
| SSR3       | 1.93581002493988   | 2 | 0.379878044814884    |
|            | 0.193174158512663  |   |                      |
| TIPARP-AS1 | 1.5695725979876    | 2 | 0.456217185440665    |
|            | 0.730720529542833  |   |                      |
| TIPARP     | 7.0851156805962    | 2 | 0.0289392104546619   |
|            | 0.521673846872115  |   |                      |
| LINC00886  | 2.9245172636826    | 2 | 0.231712330406353    |
|            | 1.25691533417329   |   |                      |
| LEKR1      | 0.876826490280957  | 2 | 0.645059160207555    |
|            | 0.584990345186465  |   |                      |
| CCNL1      | 2.10797302057547   | 2 | 0.348545495634499    |
|            | 0.133072583481457  |   |                      |
| RSRC1      | 1.98079777853771   | 2 | 0.371428502624786    |
|            | 0.255935463820454  |   |                      |
| AC106707.1 | 3.10040167396657   | 2 | 0.212205350864249    |
|            | 0.558463740833895  |   |                      |
| GFM1       | 0.303616951417164  | 2 | 0.859152813618447    |
|            | 0.0538205388345139 |   |                      |
| LXN        | 0.809602512883381  | 2 | 0.667109381376506    |
|            | 0.324910693564207  |   |                      |
| MFSD1      | 1.56282718225687   | 2 | 0.457758470421274    |
|            | 0.32651917041908   |   |                      |
| IFT80      | 4.76086260132505   | 2 | 0.0925106689918498   |
|            | 1.12224145681014   |   |                      |
| SMC4       | 3.27529059808392   | 2 | 0.194437345477143    |
|            | 0.168502831793996  |   |                      |
| TRIM59     | 3.68835390811785   | 2 | 0.158155436526822    |
|            | 0.71756337591558   |   |                      |
| KPNA4      | 4.11668082019099   | 2 | 0.127665666833009    |
|            | 0.53249582472923   |   |                      |
| B3GALNT1   | 22.1080514524632   | 2 | 1.58233204822222e-05 |

|                  |                    |                                    |
|------------------|--------------------|------------------------------------|
| 1.28718416000613 |                    |                                    |
| NMD3             | 3.46729340426644 2 | 0.176639083904975                  |
|                  | 0.182748825526657  |                                    |
| PDCD10           | 7.63142180470886 2 | 0.022022053357968                  |
|                  | 0.322664227518502  |                                    |
| SERPINI1         | 2.59278885031885 2 | 0.273516200421031                  |
|                  | 0.758363764797868  |                                    |
| GOLIM4           | 1.91077753368724 2 | 0.384662571426574                  |
|                  | 0.540205830142751  |                                    |
| MYNN             | 0.329715552143239  | 2 0.848014303437214                |
|                  | 0.155389630679127  |                                    |
| LRR34            | 2.4613091265809 2  | 0.292101316292609                  |
|                  | 1.03902086154147   |                                    |
| SEC62            | 2.17970355433638 2 | 0.336266332361053                  |
|                  | 0.0813384428290505 |                                    |
| GPR160           | 16.6213058006648 2 | 0.000245883453554696               |
|                  | 0.693331848101943  |                                    |
| PHC3             | 6.59097241043464 2 | 0.0370500267509515                 |
|                  | 0.801250603433265  |                                    |
| PRKCI            | 0.558482736754306  | 2 0.756357320442097                |
|                  | 0.167191693431475  |                                    |
| SKIL             | 0.604376824396869  | 2 0.739198777701454                |
|                  | 0.161542041398307  |                                    |
| RPL22L1          | 0.0929860028072148 | 2 0.954571241205438                |
|                  | 0.0331493487427957 |                                    |
| EIF5A2           | 5.22807101844711 2 | 0.0732383923961478                 |
|                  | 1.37202675078086   |                                    |
| TNIK             | 3.30512153060758 2 | 0.191558743026471                  |
|                  | 8.40644277976036   |                                    |
| FNDC3B           | 1.85035914963709 2 | 0.396460218410479                  |
|                  | 1.73326807387123   |                                    |
| TNFSF10          | 3.16993410361031 2 | 0.204954545887863                  |
|                  | 0.509875075589185  |                                    |
| NCEH1            | 1.73129431313372 2 | 0.420779154501677                  |
|                  | 1.27309605489928   |                                    |
| TBL1XR1          | 3.99482519109006 2 | 0.135685903754311                  |
|                  | 0.353321926790386  |                                    |
| LINC00501        | 2.02846112794499 2 | 0.362681382622861                  |
|                  | 1.62692093315181   |                                    |
| ZMAT3            | 8.37084289163769 2 | 0.015215791958536                  |
|                  | 1.21598010987544   |                                    |
| PIK3CA           | 2.87227263388175 2 | 0.23784494316367 0.548265156890771 |
| KCNMB3           | 0.726355311001625  | 2 0.695462869719111                |
|                  | 0.245206788853582  |                                    |
| ZNF639           | 0.481200686913549  | 2 0.786155755904048                |
|                  | 0.0720332858665473 |                                    |
| MFN1             | 1.39110424479774 2 | 0.498798973858416                  |
|                  | 0.389218672283988  |                                    |
| GNB4             | 10.6472033881358 2 | 0.00487516321999637                |
|                  | 0.857303784075847  |                                    |

|           |                      |   |                      |
|-----------|----------------------|---|----------------------|
| ACTL6A    | 0.0112561596826697   | 2 | 0.994387728129937    |
|           | 0.0176390954304927   |   |                      |
| MRPL47    | 4.75742197107478     | 2 | 0.0926699534654143   |
|           | 0.230282300822729    |   |                      |
| NDUFB5    | 1.45644948542505     | 2 | 0.482765262363676    |
|           | 0.130859144923945    |   |                      |
| USP13     | 2.49495745634326     | 2 | 0.287228064727515    |
|           | 1.09672515680985     |   |                      |
| TTC14     | 0.111244107087214    | 2 | 0.945896566596767    |
|           | 0.0552117233523742   |   |                      |
| FXR1      | 0.103129120594466    | 2 | 0.949742332335608    |
|           | 0.0367376401332286   |   |                      |
| DNAJC19   | 1.66312693726587     | 2 | 0.435368069609204    |
|           | 0.140672061194892    |   |                      |
| ATP11B    | 0.45157219654269     | 2 | 0.797888753197278    |
|           | 0.163647476288782    |   |                      |
| DCUN1D1   | 4.75635472143222     | 2 | 0.0927194176492547   |
|           | 0.484905958983256    |   |                      |
| MCCC1     | 3.99536787235655     | 2 | 0.1356490916498      |
| KLHL6     | 27.7830072421225     | 2 | 0.578388912293276    |
|           | 1.00901829381831     |   | 9.26822635860525e-07 |
| KLHL24    | 2.22408751297742     | 2 | 0.328886110615531    |
|           | 0.240790210231547    |   |                      |
| YEATS2    | 0.740507686584587    | 2 | 0.690559014613105    |
|           | 0.523658386900651    |   |                      |
| PARL      | 4.36227348276855     | 2 | 0.112913104661821    |
|           | 0.247162364454583    |   |                      |
| ABCC5     | 0.0594945658153901   | 2 | 0.9706908127138      |
|           | 0.138632011246875    |   |                      |
| EIF2B5    | 1.06781097278929     | 2 | 0.586310664083318    |
|           | 0.125561011187166    |   |                      |
| DVL3      | 3.49576255290204     | 2 | 0.174142512706939    |
|           | 0.337507740540357    |   |                      |
| AP2M1     | 4.91948999309465     | 2 | 0.0854567399528123   |
|           | 0.181620531633567    |   |                      |
| ABCF3     | 3.90079104138496     | 2 | 0.142217810374168    |
|           | 0.547390536898022    |   |                      |
| ALG3      | 1.29652165987021     | 2 | 0.522954493125561    |
|           | 0.202341670505341    |   |                      |
| EEF1AKMT4 | 1.66426622054092     | 2 | 0.435120136452336    |
|           | 0.53545022490038     |   |                      |
| PSMD2     | 0.000148886782973942 | 2 | 0.999925559379354    |
|           | 0.00140892965486248  |   |                      |
| EIF4G1    | 1.71098591792009     | 2 | 0.425073595587907    |
|           | 0.262954142747382    |   |                      |
| POLR2H    | 0.287314222104578    | 2 | 0.866184702306228    |
|           | 0.104480467944679    |   |                      |
| MAGEF1    | 1.55499353655087     | 2 | 0.45955494519939     |
| VPS8      | 0.0828580457278972   | 2 | 0.192605169415117    |
|           | 0.0874685906906495   |   | 0.959417429626308    |

|            |                      |   |                      |
|------------|----------------------|---|----------------------|
| MAP3K13    | 4.78256731317775     | 2 | 0.0915121382902836   |
|            | 0.723227904180782    |   |                      |
| TMEM41A    | 0.179382980828961    | 2 | 0.914213185300009    |
|            | 0.205369511909279    |   |                      |
| SENP2      | 1.4353690378684      | 2 | 0.48788062744965     |
| TRA2B      | 0.0888216719012274   | 2 | 0.326861807186518    |
|            | 0.0252419359107811   |   | 0.956560887133477    |
| ETV5       | 0.714307793477207    | 2 | 0.699664813315798    |
|            | 0.592456670763014    |   |                      |
| DGKG       | 4.90013061296098     | 2 | 0.0862879511529617   |
|            | 3.1150115077205      |   |                      |
| TBCCD1     | 0.000155013887194846 | 2 | 0.999922496059988    |
|            | 0.0055617098150128   |   |                      |
| DNAJB11    | 0.00216989641141566  | 2 | 0.998915640137803    |
|            | 0.00782599718782578  |   |                      |
| EIF4A2     | 9.56516558689031     | 2 | 0.00837434181640584  |
|            | 0.227461022248552    |   |                      |
| RFC4       | 2.42504471026396     | 2 | 0.297446067801313    |
|            | 0.339722718700636    |   |                      |
| ST6GAL1    | 11.4707246582378     | 2 | 0.00322971193763655  |
|            | 0.314322498559631    |   |                      |
| RPL39L     | 1.94907923310141     | 2 | 0.377366046659584    |
|            | 0.295110866577631    |   |                      |
| RTP4       | 7.89731785863453     | 2 | 0.0192805410136926   |
|            | 2.25980987412601     |   |                      |
| BCL6       | 3.28045855325657     | 2 | 0.193935572299001    |
|            | 0.317180325352078    |   |                      |
| LINC01991  | 63.884847151617      | 2 | 1.34336985979644e-14 |
|            | 2.17785636187971     |   |                      |
| LPP-AS2    | 3.70256000563262     | 2 | 0.15703603105223     |
| LPP        | 14.6631187616781     | 2 | 1.21675681442922     |
|            | 0.278972161472567    |   | 0.000654552094890071 |
| CCDC50     | 2.6989554114316      | 2 | 0.259375695717664    |
|            | 0.27955720774959     |   |                      |
| OPA1       | 0.491404852917928    | 2 | 0.782154938913809    |
|            | 0.233861522521457    |   |                      |
| HES1       | 38.3078008453805     | 2 | 4.8035989630435e-09  |
|            | 3.37684125598845     |   |                      |
| ATP13A3    | 1.08882699455612     | 2 | 0.580181961872137    |
|            | 0.426014136176077    |   |                      |
| TMEM44-AS1 | 4.18331531884886     | 2 | 0.123482274513133    |
|            | 1.00628664364476     |   |                      |
| TMEM44     | 3.38837024215139     | 2 | 0.183748901144016    |
|            | 3.5150450941464      |   |                      |
| LSG1       | 0.498253395288906    | 2 | 0.779481208695169    |
|            | 0.175200281500768    |   |                      |
| FAM43A     | 0.0192004590082757   | 2 | 0.990445705585802    |
|            | 0.0303947756777899   |   |                      |
| XXYLT1     | 2.12659509615279     | 2 | 0.345315237220012    |
|            | 0.953605812022626    |   |                      |

|                     |                      |   |                     |
|---------------------|----------------------|---|---------------------|
| XXYLT1-AS2          | 2.49085589974126     | 2 | 0.287817710219532   |
| 1.06071326814149    |                      |   |                     |
| ACAP2               | 1.45346274702375     | 2 | 0.483486747725557   |
| 0.158733242339979   |                      |   |                     |
| PPP1R2              | 11.3190912067032     | 2 | 0.0034840997018013  |
| 0.427448805339781   |                      |   |                     |
| MUC20-OT1           | 1.82056945296706     | 2 | 0.402409631041395   |
| 0.297626804825318   |                      |   |                     |
| TNK2                | 1.13653349000307     | 2 | 0.566506488452013   |
| 0.332915892304577   |                      |   |                     |
| TFRC                | 0.000127372392740979 | 2 | 0.999936315831552   |
| 0.00315451119981553 |                      |   |                     |
| PCYT1A              | 1.57916026408121     | 2 | 0.454035390179979   |
| 0.478550906895954   |                      |   |                     |
| TCTEX1D2            | 5.98339516507837     | 2 | 0.0502021420669128  |
| 0.551461906469814   |                      |   |                     |
| UBXN7               | 1.65291722402252     | 2 | 0.437596243597817   |
| 0.414954982190397   |                      |   |                     |
| RNF168              | 2.94506807698619     | 2 | 0.229343582749688   |
| 0.247393076619673   |                      |   |                     |
| WDR53               | 0.674163500578041    | 2 | 0.713850480034224   |
| 0.1932002301138     |                      |   |                     |
| FBX045              | 0.864832876992886    | 2 | 0.648939077193907   |
| 0.631116932177159   |                      |   |                     |
| PIGX                | 1.54131448678413     | 2 | 0.462708856013352   |
| 0.333249421511332   |                      |   |                     |
| CEP19               | 1.68945241327996     | 2 | 0.429674984265047   |
| 0.683740128101067   |                      |   |                     |
| PAK2                | 9.47120101464811     | 2 | 0.00877717649011267 |
| 0.430010377623163   |                      |   |                     |
| SENP5               | 0.000433549491511678 | 2 | 0.999783248748192   |
| 0.00465106678510153 |                      |   |                     |
| NCBP2               | 2.46194438837858     | 2 | 0.292008550622364   |
| 0.193909180875483   |                      |   |                     |
| NCBP2-AS2           | 0.0403366880363871   | 2 | 0.980033676611956   |
| 0.0335828955842474  |                      |   |                     |
| PIGZ                | 3.56510106904791     | 2 | 0.168208577900553   |
| 1.60537446243276    |                      |   |                     |
| MELTF               | 6.21584716245383     | 2 | 0.0446936618166659  |
| 1.0981501893172     |                      |   |                     |
| MELTF-AS1           | 3.52292619464272     | 2 | 0.171793329498107   |
| 6.1517258312494     |                      |   |                     |
| DLG1                | 11.1538149479319     | 2 | 0.00378425033435981 |
| 0.705548485991089   |                      |   |                     |
| BDH1                | 0.661822335755043    | 2 | 0.718268971563926   |
| 0.356400922819525   |                      |   |                     |
| AC024560.1          | 2.64007618474211     | 2 | 0.267125126342614   |
| 2.39970294208496    |                      |   |                     |
| RUBCN               | 1.85242669125364     | 2 | 0.39605058118203    |
| 0.245263411993821   |                      |   |                     |
| FYTTD1              | 0.00269673490824827  | 2 | 0.998652541184833   |

|                               |   |                      |                   |
|-------------------------------|---|----------------------|-------------------|
| 0.00638020218372494           |   |                      |                   |
| LRCH3 5.89886867280566 2      |   | 0.0523693209900599   |                   |
| 0.651659119304747             |   |                      |                   |
| IQCG 1.20387244418961 2       |   | 0.54775004295004     | 0.645179111562573 |
| RPL35A 29.0671519925726 2     |   | 4.87694819639728e-07 |                   |
| 0.144995996955149             |   |                      |                   |
| ZNF595 1.95798567317256 2     |   | 0.375689288876535    |                   |
| 0.202198788327874             |   |                      |                   |
| ZNF718 0.0313841616575322     | 2 | 0.984430398383484    |                   |
| 0.0679241091707189            |   |                      |                   |
| ZNF141 7.59455765908192 2     |   | 0.0224317294400601   |                   |
| 0.672774466436863             |   |                      |                   |
| ZNF721 0.00362215701203738    | 2 | 0.998190560507049    |                   |
| 0.0162538578746256            |   |                      |                   |
| PIGG 0.281113323855407        | 2 | 0.86887443143774     |                   |
| 0.227501859770804             |   |                      |                   |
| PDE6B 0.172795602640463       | 2 | 0.917229283616666    |                   |
| 0.190117901422254             |   |                      |                   |
| AC107464.3 0.0850349678690192 | 2 | 0.958373709231297    |                   |
| 0.204744871202566             |   |                      |                   |
| ATP5ME 24.2968993777234 2     |   | 5.29657756276336e-06 |                   |
| 0.156346157154656             |   |                      |                   |
| MYL5 0.767934968271716        | 2 | 0.681153575116574    |                   |
| 0.141659308805112             |   |                      |                   |
| PCGF3 1.93421104162943 2      |   | 0.380181875580614    |                   |
| 0.535045768564713             |   |                      |                   |
| AC139887.2 0.454529292228821  | 2 | 0.796709908206348    |                   |
| 0.454855948291758             |   |                      |                   |
| CPLX1 4.28772132865067 2      |   | 0.117201492846135    |                   |
| 3.93027971714423              |   |                      |                   |
| GAK 0.00279378320838426       | 2 | 0.99860408359475     |                   |
| 0.0173465721821642            |   |                      |                   |
| TMEM175 0.13732433480719 2    |   | 0.933642041520515    |                   |
| 0.179968074218565             |   |                      |                   |
| DGKQ 0.339791561208078        | 2 | 0.843752747415932    |                   |
| 0.543723871760791             |   |                      |                   |
| IDUA 3.37417145467824 2       |   | 0.185058048519674    |                   |
| 1.94776327286633              |   |                      |                   |
| CTBP1 2.24030570868205 2      |   | 0.326229925151523    |                   |
| 0.329497892471461             |   |                      |                   |
| CTBP1-DT 0.396086094287826    | 2 | 0.820334539318786    |                   |
| 0.397641814895628             |   |                      |                   |
| MAEA 0.482261785961838        | 2 | 0.785738771966945    |                   |
| 0.158528404538002             |   |                      |                   |
| UVSSA 1.12789813421853 2      |   | 0.568957769105039    |                   |
| 0.905962505670295             |   |                      |                   |
| AC147067.1 0.214946075701816  | 2 | 0.898100736850332    |                   |
| 0.345839479948259             |   |                      |                   |
| SLBP 33.7605351059699 2       |   | 4.66651803865403e-08 |                   |
| 0.607715232251709             |   |                      |                   |

|                    |                     |   |                      |
|--------------------|---------------------|---|----------------------|
| AC016773.1         | 0.243078730806455   | 2 | 0.88555619238612     |
| 0.381805418464419  |                     |   |                      |
| TMEM129            | 0.0784003140282796  | 2 | 0.96155822726002     |
| 0.0557509954678864 |                     |   |                      |
| TACC3              | 0.3322802339492     | 2 | 0.846927556948261    |
| 0.141342042813826  |                     |   |                      |
| LETM1              | 5.31012951379106    | 2 | 0.0702942864780716   |
| 0.663610804263554  |                     |   |                      |
| NSD2               | 0.0316812366898021  | 2 | 0.984284184396701    |
| 0.0621863714128544 |                     |   |                      |
| NELFA              | 2.47109276141416    | 2 | 0.290675899268564    |
| 0.323788493763075  |                     |   |                      |
| C4orf48            | 7.11793944625835    | 2 | 0.0284681396761914   |
| 0.437501494786849  |                     |   |                      |
| HAUS3              | 5.95057692282252    | 2 | 0.0510327109129244   |
| 0.640984756549089  |                     |   |                      |
| MXD4               | 14.2171128691025    | 2 | 0.000818075085056602 |
| 0.804188670755059  |                     |   |                      |
| ZFYVE28            | 0.69926035596419    | 2 | 0.704948747085493    |
| 0.804495601470292  |                     |   |                      |
| RNF4               | 4.67485740198127    | 2 | 0.0965756441032345   |
| 0.66918134847249   |                     |   |                      |
| FAM193A            | 1.9261441335819     | 2 | 0.381718418400712    |
| 0.466911569276831  |                     |   |                      |
| TNIP2              | 0.665293632274079   | 2 | 0.717023390531531    |
| 0.159395312584944  |                     |   |                      |
| SH3BP2             | 3.95960622128068    | 2 | 0.138096424350947    |
| 1.20579579839374   |                     |   |                      |
| ADD1               | 2.41772634735772    | 2 | 0.298536470710292    |
| 0.322002279301783  |                     |   |                      |
| MFSD10             | 0.17896280722554    | 2 | 0.914405269600672    |
| 0.0615866347478739 |                     |   |                      |
| NOP14-AS1          | 2.32546596049866    | 2 | 0.312630599018525    |
| 0.671746337375429  |                     |   |                      |
| NOP14              | 0.549075690071092   | 2 | 0.759923244382521    |
| 0.18376050945762   |                     |   |                      |
| HTT                | 3.30829099001982    | 2 | 0.19125541460619     |
| DOK7               | 2.15586258618763    | 2 | 0.312544775543868    |
| 0.502076915151529  |                     |   | 0.340298776413212    |
| LRPAP1             | 4.24657061015399    | 2 | 0.119637935048576    |
| 0.236211368740114  |                     |   |                      |
| TMEM128            | 3.32440895390757    | 2 | 0.189720284773533    |
| 0.630901815777743  |                     |   |                      |
| LYAR               | 0.0536579282485403  | 2 | 0.973527735454494    |
| 0.0654558613981551 |                     |   |                      |
| ZBTB49             | 0.159909368173486   | 2 | 0.923158179194753    |
| 0.256110335740504  |                     |   |                      |
| NSG1               | 0.0168761156731396  | 2 | 0.991597442651559    |
| 0.0690182237601102 |                     |   |                      |
| STX18              | 0.00559287569351513 | 2 | 0.997207468543384    |



|                    |                       |                      |
|--------------------|-----------------------|----------------------|
| 0.0215441543973195 |                       |                      |
| EVC2               | 1.7915002198559 2     | 0.408301212950312    |
| 0.691006695106188  |                       |                      |
| MAN2B2             | 0.00311946025184627 2 | 0.998441485620949    |
| 0.0405250125341052 |                       |                      |
| MRFAP1             | 0.684016700967502 2   | 0.710342272982803    |
| 0.106300829689789  |                       |                      |
| LINC02482          | 4.96891833704031 2    | 0.0833706317835436   |
| 2.53026234376127   |                       |                      |
| AC093323.1         | 1.26686463579037 2    | 0.530766910231662    |
| 0.45376194084418   |                       |                      |
| MRFAP1L1           | 0.0362269633074515 2  | 0.982049581424062    |
| 0.0407984671188689 |                       |                      |
| BLOC1S4            | 3.17983814221584 2    | 0.203942115875859    |
| 0.289856462695347  |                       |                      |
| KIAA0232           | 1.18903631967815 2    | 0.551828394901737    |
| 0.511999238456279  |                       |                      |
| TBC1D14            | 2.88758815207746 2    | 0.236030539884456    |
| 0.728050413187707  |                       |                      |
| TADA2B             | 0.497473561906902 2   | 0.779785200690686    |
| 0.605297061643518  |                       |                      |
| GRPEL1             | 0.0618068061350475 2  | 0.969569225965714    |
| 0.0460165201911399 |                       |                      |
| ABLIM2             | 2.66853199193731 2    | 0.263351405524844    |
| 0.823714968626631  |                       |                      |
| SH3TC1             | 103.292260012602 2    | 0 1.75596926104888   |
| ACOX3              | 0.999622351902021 2   | 0.606645198101097    |
| 0.322201611700124  |                       |                      |
| TRMT44             | 3.00111447227812 2    | 0.223005858595356    |
| 1.00981418052626   |                       |                      |
| WDR1               | 1.80987648876866 2    | 0.404566868607626    |
| 0.124340333266714  |                       |                      |
| ZNF518B            | 0.834631216470469 2   | 0.658812960333204    |
| 0.478643087117272  |                       |                      |
| RAB28              | 0.0783913864651254 2  | 0.961562519455499    |
| 0.0713086283069432 |                       |                      |
| BOD1L1             | 4.42310496982924 2    | 0.109530472045948    |
| 0.329446977416575  |                       |                      |
| CPEB2              | 0.458284840158569 2   | 0.795215270817927    |
| 0.675745558258899  |                       |                      |
| FBXL5              | 0.486795667914095 2   | 0.783959565987658    |
| 0.116178708873594  |                       |                      |
| FAM200B            | 3.62225074719108 2    | 0.163470068350659    |
| 0.437490004767271  |                       |                      |
| CD38               | 29.4895397416229 2    | 3.94846059514897e-07 |
| 0.420456983408782  |                       |                      |
| TAPT1              | 0.398921980611601 2   | 0.819172175845718    |
| 0.291595925630936  |                       |                      |
| QDPR               | 4.65479396635771 2    | 0.0975493394652539   |
| 0.879580585635     |                       |                      |

|             |                     |   |                    |
|-------------|---------------------|---|--------------------|
| LAP3        | 8.22163607354546    | 2 | 0.0163943578517862 |
|             | 0.344423440065338   |   |                    |
| MED28       | 1.07830277655945    | 2 | 0.583242989260995  |
|             | 0.113164042987437   |   |                    |
| FAM184B     | 2.64817879340792    | 2 | 0.266045110374717  |
|             | 0.58140429087807    |   |                    |
| DCAF16      | 0.340301306425959   | 2 | 0.843537725354678  |
|             | 0.224987725556715   |   |                    |
| NCAPG       | 0.219354911180627   | 2 | 0.896123128192891  |
|             | 0.264738554649121   |   |                    |
| LCORL       | 0.001410691889906   | 2 | 0.999294902753022  |
|             | 0.0129756514934944  |   |                    |
| PACRGL      | 1.73822496510235    | 2 | 0.419323541108024  |
|             | 1.37371606449461    |   |                    |
| DHX15       | 0.128995466295016   | 2 | 0.937538239520535  |
|             | 0.0575438702884087  |   |                    |
| CCDC149     | 3.12455122314666    | 2 | 0.209658426797851  |
|             | 7.65046796314544    |   |                    |
| SEPSECS     | 4.61825199159861    | 2 | 0.0993480442335309 |
|             | 1.97337708286459    |   |                    |
| SEPSECS-AS1 | 0.323971195463036   | 2 | 0.850453452910991  |
|             | 0.386496696928085   |   |                    |
| PI4K2B      | 2.69538326205112    | 2 | 0.259839374041846  |
|             | 0.706087832570197   |   |                    |
| ZCCHC4      | 0.00967196571129003 | 2 | 0.995175691682574  |
|             | 0.0492148661432402  |   |                    |
| ANAPC4      | 2.85639072584429    | 2 | 0.23974117791289   |
|             | 0.0910348744721638  |   | 0.665156095754226  |
| SEL1L3      | 1.00238461097578    | 2 | 0.605807920826873  |
|             | 0.0910348744721638  |   |                    |
| SMIM20      | 3.57032516767928    | 2 | 0.167769782127341  |
|             | 0.202557601388303   |   |                    |
| RBPJ        | 0.0523976272996006  | 2 | 0.974141397748387  |
|             | 0.0426441214638371  |   |                    |
| TBC1D19     | 0.0744337599765441  | 2 | 0.963467155942666  |
|             | 0.203408861203078   |   |                    |
| STIM2       | 4.3827442229912     | 2 | 0.111763291664102  |
|             | 0.293297300467441   |   |                    |
| AC106047.1  | 2.67949434021907    | 2 | 0.261911879361712  |
|             | 1.39773959825287    |   |                    |
| ARAP2       | 6.29651027717993    | 2 | 0.0429269631600415 |
|             | 1.2482836571887     |   |                    |
| PGM2        | 3.71083904157469    | 2 | 0.156387321179015  |
|             | 0.485267624747822   |   |                    |
| TBC1D1      | 0.428461953462347   | 2 | 0.807161927866252  |
|             | 0.0710747748828691  |   |                    |
| KLF3        | 1.35953456781108    | 2 | 0.506734904012877  |
|             | 1.17182639529488    |   |                    |
| TLR10       | 8.85491379391511    | 2 | 0.0119448280081313 |
|             | 0.453059985647289   |   |                    |
| TLR1        | 6.83110452484249    | 2 | 0.0328582553101736 |

|                  |                    |                                    |
|------------------|--------------------|------------------------------------|
| 1.15961965310026 |                    |                                    |
| TLR6             | 1.48125725867193 2 | 0.476814081969098                  |
|                  | 0.514870315714946  |                                    |
| TMEM156          | 58.4354462962145 2 | 2.04614103438416e-13               |
|                  | 0.883750564251815  |                                    |
| KLHL5            | 6.59329256076398 2 | 0.0370070708559183                 |
|                  | 0.278405222727947  |                                    |
| WDR19            | 2.21151555185064 2 | 0.330959993679875                  |
|                  | 0.828533770103414  |                                    |
| RFC1             | 7.762365866541 2   | 0.0206264110765174                 |
|                  | 0.251098575640944  |                                    |
| RPL9             | 0.657182855368696  | 2 0.719937103034537                |
|                  | 0.0344909578198271 |                                    |
| LIAS             | 3.95730847057897 2 | 0.138255171101579                  |
|                  | 0.602043358093837  |                                    |
| UGDH             | 1.44402895099399 2 | 0.48577269245184 0.337136254945419 |
| SMIM14           | 160.787012621735 2 | 0 1.28868428024952                 |
| UBE2K            | 5.88513737581017 2 | 0.0527301074393127                 |
|                  | 0.224222580900913  |                                    |
| PDS5A            | 0.0139208470428561 | 2 0.993063744121518                |
|                  | 0.0288496098775094 |                                    |
| N4BP2            | 0.158610437384012  | 2 0.923757933224671                |
|                  | 0.281990120801384  |                                    |
| RHOH             | 7.88648898611085 2 | 0.0193852174001911                 |
|                  | 0.190043202654654  |                                    |
| APBB2            | 4.18689380896623 2 | 0.123261532003737                  |
|                  | 1.61815349173076   |                                    |
| UCHL1            | 17.8035236814119 2 | 0.00013614884247648                |
|                  | 1.02229854374316   |                                    |
| TMEM33           | 3.51713611965402 2 | 0.172291398244261                  |
|                  | 0.472929433466776  |                                    |
| SLC30A9          | 0.764953321858559  | 2 0.682169812000146                |
|                  | 0.245715298671338  |                                    |
| ATP8A1           | 11.4655595753391 2 | 0.00323806358217726                |
|                  | 0.777852390842304  |                                    |
| GUF1             | 0.390011288032682  | 2 0.822830013976868                |
|                  | 0.301162262467969  |                                    |
| GNPDA2           | 2.87788830609309 2 | 0.237178050245856                  |
|                  | 0.516312365816774  |                                    |
| COMMD8           | 2.74651510545153 2 | 0.253280539518298                  |
|                  | 0.138484323037584  |                                    |
| ATP10D           | 2.70639528517686 2 | 0.258412626891493                  |
|                  | 0.544514466066501  |                                    |
| NFXL1            | 3.79787522221455 2 | 0.149727603699115                  |
|                  | 0.959465425556336  |                                    |
| TEC              | 6.86203441895987 2 | 0.0323540132196756                 |
|                  | 2.35559408278855   |                                    |
| SLAIN2           | 0.227765664660047  | 2 0.892362505792932                |
|                  | 0.139481770555528  |                                    |
| FRYL             | 0.186155385725485  | 2 0.911122709814583                |

|                               |   |                                    |
|-------------------------------|---|------------------------------------|
| 0.133595835655668             |   |                                    |
| OCIAD1 3.38929016051193 2     |   | 0.183664403584274                  |
| 0.216603477385573             |   |                                    |
| OCIAD2 0.449135227380493      | 2 | 0.79886156089571                   |
| 0.0273818291839284            |   |                                    |
| DCUN1D4 0.539315463408473     | 2 | 0.763640819654535                  |
| 0.4011765608968               |   |                                    |
| SGCB 4.61463528139846 2       |   | 0.0995278633153768                 |
| 0.734129979628001             |   |                                    |
| USP46 0.773967307400723       | 2 | 0.679102195643884                  |
| 0.552329334599875             |   |                                    |
| USP46-AS1 0.00176889141144208 | 2 | 0.999115945301099                  |
| 0.0350442847340957            |   |                                    |
| SCFD2 1.54525403228182 2      |   | 0.461798321785289                  |
| 0.484065817955981             |   |                                    |
| FIP1L1 0.0142153641132966     | 2 | 0.992917517775982                  |
| 0.0172246712690188            |   |                                    |
| LNK1 0.660398572645788        | 2 | 0.718780476039743                  |
| 0.801527484241545             |   |                                    |
| CHIC2 0.263486562696247       | 2 | 0.876565997038078                  |
| 0.0790565188431147            |   |                                    |
| GSX2 0.635272202919679        | 2 | 0.727867610188322                  |
| 0.470729423478619             |   |                                    |
| SRD5A3 0.399862066002821      | 2 | 0.818787220427844                  |
| 0.543785697847921             |   |                                    |
| TMEM165 0.0529793590860008    | 2 | 0.973858094444259                  |
| 0.0086712878187356            |   |                                    |
| CLOCK 1.63443983978182 2      |   | 0.441657793380534                  |
| 0.703653447567678             |   |                                    |
| EXOC1 0.16612146251873 2      |   | 0.920295254833121                  |
| 0.109472810099026             |   |                                    |
| CEP135 9.13183200173477 2     |   | 0.0104003481142873                 |
| 0.560937189305827             |   |                                    |
| AASDH 0.391597746961957       | 2 | 0.822177579764624                  |
| 0.219643956100072             |   |                                    |
| PPAT 0.543854893808262        | 2 | 0.761909537980311                  |
| 0.293094620902985             |   |                                    |
| PAICS 2.07278075858711 2      |   | 0.354732824715067                  |
| 0.193080279853696             |   |                                    |
| SRP72 0.342508500331712       | 2 | 0.842607313185789                  |
| 0.0717372887497484            |   |                                    |
| HOPX 30.5809614841794 2       |   | 2.28785548395116e-07               |
| 0.947377298529713             |   |                                    |
| SPINK2 6.35865250961492 2     |   | 0.0416136826970518                 |
| 1.11106299673571              |   |                                    |
| REST 0.672611208162491        | 2 | 0.714404747445672                  |
| 0.117693318941404             |   |                                    |
| NOA1 7.9234262773758 2        |   | 0.0190304844906742                 |
| 0.506405746408819             |   |                                    |
| POLR2B 1.47256139361601 2     |   | 0.47889175093501 0.203234243253901 |

|          |                    |   |                      |
|----------|--------------------|---|----------------------|
| CENPC    | 0.520592895627947  | 2 | 0.770823043123657    |
|          | 0.145222815590002  |   |                      |
| STAP1    | 0.985937989542793  | 2 | 0.610810207082398    |
|          | 0.129432923479214  |   |                      |
| UBA6     | 5.11851953657901   | 2 | 0.0773619850480696   |
|          | 0.579718120136456  |   |                      |
| UBA6-AS1 | 0.198154958919067  | 2 | 0.905672534286601    |
|          | 0.222168013066254  |   |                      |
| YTHDC1   | 0.0457336434854053 | 2 | 0.977392642554756    |
|          | 0.0300251190318306 |   |                      |
| UGT2B17  | 2.3182187760384    | 2 | 0.313765499795036    |
|          | 0.948243005864234  |   |                      |
| FDCSP    | 0.66361367314273   | 2 | 0.717625928552073    |
|          | 0.833796131645096  |   |                      |
| ENAM     | 7.73725872669026   | 2 | 0.0208869782725983   |
|          | 1.56123401209872   |   |                      |
| JCHAIN   | 98.3729956725651   | 0 | 0.533020106759406    |
| UTP3     | 0.186587945465584  | 2 | 0.910925673621555    |
|          | 0.0725903968586389 |   |                      |
| RUFY3    | 3.66058337917241   | 2 | 0.160366783631522    |
|          | 0.440979693415357  |   |                      |
| GRSF1    | 0.967096882044597  | 2 | 0.616591566515977    |
|          | 0.128693707924507  |   |                      |
| MOB1B    | 1.70713452761101   | 2 | 0.425892946408005    |
|          | 0.402997666499812  |   |                      |
| DCK      | 21.0006012153836   | 2 | 2.75281729252841e-05 |
|          | 0.295677220877771  |   |                      |
| COX18    | 1.57191175281233   | 2 | 0.455683916036155    |
|          | 0.732195948177713  |   |                      |
| ANKRD17  | 3.07662276982999   | 2 | 0.214743414406276    |
|          | 0.21735917646969   |   |                      |
| RASSF6   | 247.177804681314   | 0 | 1.08882927634702     |
| MTHFD2L  | 2.51151265317781   | 2 | 0.28486031929599     |
|          | 0.411276482462525  |   | 0.475664037651891    |
| AREG     | 1.74887124921081   | 2 | 0.417097352747207    |
|          | 0.411276482462525  |   |                      |
| PARM1    | 1.36995404101531   | 2 | 0.504101813445494    |
|          | 0.540800945966062  |   |                      |
| RCHY1    | 0.687510425197144  | 2 | 0.709102486161158    |
|          | 0.182033453901307  |   |                      |
| THAP6    | 0.40882494324287   | 2 | 0.815126085459757    |
|          | 0.243719383352044  |   |                      |
| G3BP2    | 1.89305739297837   | 2 | 0.388085851730127    |
|          | 0.218011345345598  |   |                      |
| US01     | 1.5738187213178    | 2 | 0.455249635670635    |
|          | 0.272360949210065  |   |                      |
| NAAA     | 0.430083075401268  | 2 | 0.806507938996222    |
|          | 0.183217311292336  |   |                      |
| SDAD1    | 1.63945134024169   | 2 | 0.440552494642827    |
|          | 0.169868949593297  |   |                      |
| NUP54    | 3.74594114539301   | 2 | 0.153666505617491    |

|                              |   |                      |
|------------------------------|---|----------------------|
| 0.504670738444527            |   |                      |
| SCARB2 0.00101046758272865   | 2 | 0.999494893817736    |
| 0.0199557989521467           |   |                      |
| SHR00M3 3.3935334159279      | 2 | 0.183275149169148    |
| 2.00796560994985             |   |                      |
| SEPT11 6.34674520658323      | 2 | 0.0418621750465437   |
| 0.558533287596043            |   |                      |
| CCNI 25.9372158940701        | 2 | 2.33241126679218e-06 |
| 0.303786526071498            |   |                      |
| CCNG2 10.8036073509625       | 2 | 0.00450844183866517  |
| 0.427507166743093            |   |                      |
| CNOT6L 0.904954991205782     | 2 | 0.636050385940644    |
| 0.222621389997397            |   |                      |
| MRPL1 0.112458315473459      | 2 | 0.945322483106806    |
| 0.0490034717836933           |   |                      |
| AC098818.2 1.72596745500501  | 2 | 0.421901363730389    |
| 0.847201447811124            |   |                      |
| BMP2K 0.82029025302873       | 2 | 0.663553943877225    |
| 0.287722255859167            |   |                      |
| PAQR3 0.572892858401016      | 2 | 0.750927305229694    |
| 0.407792065813793            |   |                      |
| BMP3 5.50770888065625        | 2 | 0.0636819293496937   |
| 5.88111728610696             |   |                      |
| RASGEF1B 0.0788504514199059  | 2 | 0.961341834956342    |
| 0.0847750880175031           |   |                      |
| AC124016.2 1.40958690035721  | 2 | 0.494210642834665    |
| 1.54372555798564             |   |                      |
| HNRNPD 1.28474326179533      | 2 | 0.526043362779686    |
| 0.0897278919692091           |   |                      |
| AC124016.1 2.19957265605169  | 2 | 0.332942216518948    |
| 0.972263208129719            |   |                      |
| HNRNPDL 7.19800347695949     | 2 | 0.0273510122869339   |
| 0.209299279161605            |   |                      |
| ENOPH1 0.614390392117556     | 2 | 0.735507018823103    |
| 0.130580633330714            |   |                      |
| SEC31A 0.0108362276819009    | 2 | 0.994596537664728    |
| 0.0239792628720955           |   |                      |
| THAP9-AS1 0.0508324755909786 | 2 | 0.974904035657034    |
| 0.0784630631963844           |   |                      |
| THAP9 5.15589389656832       | 2 | 0.0759297317756862   |
| 2.73777260170798             |   |                      |
| LIN54 0.802981975913228      | 2 | 0.669321351625604    |
| 0.681588695616324            |   |                      |
| COPS4 2.439127150902         | 2 | 0.295359040736267    |
| 0.142799592141184            |   |                      |
| PLAC8 7.69924307604492       | 2 | 0.0212877915336888   |
| 1.15422897811437             |   |                      |
| COQ2 8.56957691356266        | 2 | 0.0137765355457341   |
| 0.693403064508936            |   |                      |
| HELQ 4.74882404475759        | 2 | 0.0930691957302959   |

|                               |   |                      |
|-------------------------------|---|----------------------|
| 0.689698610440231             |   |                      |
| MRPS18C 1.46984293259765 2    |   | 0.479543117792045    |
| 0.123286875987075             |   |                      |
| ABRAXAS1 2.39387465416493 2   |   | 0.302118085306798    |
| 0.37612461548203              |   |                      |
| ARHGAP24 13.1176910688646 2   |   | 0.00141752124555006  |
| 0.628183204907527             |   |                      |
| MAPK10 4.08969921332002 2     |   | 0.129399649359514    |
| 0.56566915225638              |   |                      |
| AFF1 4.69695434098292 2       |   | 0.0955145038271361   |
| 1.72771183391247              |   |                      |
| KLHL8 0.0175724645465323      | 2 | 0.991252253866977    |
| 0.0801443330761759            |   |                      |
| HSD17B11 7.11610695915088 2   |   | 0.0284942353788407   |
| 0.258988386130138             |   |                      |
| NUDT9 0.155502579482731       | 2 | 0.925194503295331    |
| 0.114449706786153             |   |                      |
| PKD2 2.40023380840047 2       |   | 0.301159003101812    |
| 1.42026741868232              |   |                      |
| PPM1K 4.40393607582906 2      |   | 0.110585307984843    |
| 0.273253660787944             |   |                      |
| AC107067.1 1.68118795259386 2 |   | 0.431454173751381    |
| 1.34512018173461              |   |                      |
| PYURF 16.5494850748855 2      |   | 0.000254873672519418 |
| 0.346777542015543             |   |                      |
| HERC3 0.531734028402343       | 2 | 0.766541059798267    |
| 0.399492656609505             |   |                      |
| NAP1L5 0.0726591659127312     | 2 | 0.964322416869602    |
| 0.125793554845956             |   |                      |
| TIGD2 2.65655691802079 2      |   | 0.264932961887043    |
| 1.93389992533298              |   |                      |
| GPRIN3 13.8502987414024 2     |   | 0.000982756312185251 |
| 2.39306349026335              |   |                      |
| CCSER1 0.138589547258279      | 2 | 0.933051600530633    |
| 0.372353245130228             |   |                      |
| SMARCAD1 1.79005465591093 2   |   | 0.408596432383167    |
| 0.394760114674384             |   |                      |
| PDLIM5 0.458732299963069      | 2 | 0.795037377283913    |
| 0.147464505300056             |   |                      |
| RAP1GDS1 0.580421183453045    | 2 | 0.748106006053134    |
| 0.194414440257115             |   |                      |
| EIF4E 3.87371842963338 2      |   | 0.144156002542653    |
| 0.227112983651823             |   |                      |
| METAP1 1.1240674486063 2      |   | 0.570048562563308    |
| 0.248829587753182             |   |                      |
| ADH5 1.01206069165264 2       |   | 0.602884076210783    |
| 0.069146354211162             |   |                      |
| TRMT10A 1.95841186825008 2    |   | 0.375609238943263    |
| 0.456254203843711             |   |                      |
| DAPP1 0.0240650003928516      | 2 | 0.988039600859006    |

|                                |   |   |                                    |
|--------------------------------|---|---|------------------------------------|
| 0.0184995804791654             |   |   |                                    |
| LAMTOR3 0.867007315930951      | 2 |   | 0.648233921393984                  |
| 0.188797972378062              |   |   |                                    |
| DNAJB14 1.78171687150918 2     |   |   | 0.410303382436632                  |
| 0.2925378138542                |   |   |                                    |
| H2AFZ 2.40544233128826 2       |   |   | 0.300375726692522                  |
| 0.0926515835547269             |   |   |                                    |
| PPP3CA 1.20865760943846 2      |   |   | 0.546441072249456                  |
| 0.268664348965393              |   |   |                                    |
| AP001816.1 7.47998868172014 2  |   |   | 0.0237542375594789                 |
| 1.35536624500427               |   |   |                                    |
| BANK1 17.4380126087242 2       |   |   | 0.000163449529335224               |
| 0.518175847421316              |   |   |                                    |
| SLC39A8 9.25762461748058 2     |   |   | 0.0097663516272769                 |
| 0.836173033693847              |   |   |                                    |
| AC098487.1 2.76950066558745 2  |   |   | 0.25038630523791                   |
| 1.26208277904443               |   |   |                                    |
| NFKB1 1.98106789126257 2       |   |   | 0.371378342229636                  |
| 0.197597928616873              |   |   |                                    |
| MANBA 0.706844323992495 2      |   |   | 0.702280654584876                  |
| 0.265250088914993              |   |   |                                    |
| UBE2D3 16.1408179974155 2      |   |   | 0.000312655379265614               |
| 0.150089225207644              |   |   |                                    |
| AC018797.2 0.270639551782346 2 |   | 2 | 0.873436563070599                  |
| 0.481993397910258              |   |   |                                    |
| CISD2 0.207239639117217 2      |   |   | 0.901567990791102                  |
| 0.0612714819861243             |   |   |                                    |
| SLC9B1 0.11583468081667 2      |   |   | 0.943727952380012                  |
| 0.316060134335514              |   |   |                                    |
| SLC9B2 3.91426422468806 2      |   |   | 0.14126296686653 0.595093777785915 |
| BDH2 10.6955658644656 2        |   |   | 0.00475868965008053                |
| 0.952012467095269              |   |   |                                    |
| CENPE 6.20011232857012 2       |   |   | 0.0450466723083638                 |
| 1.76823028228481               |   |   |                                    |
| TET2 1.08872358012742 2        |   |   | 0.580211962240811                  |
| 0.636610617692629              |   |   |                                    |
| PPA2 0.996669978732581 2       |   |   | 0.607541380907996                  |
| 0.177475786602913              |   |   |                                    |
| INTS12 7.12059230049562 2      |   |   | 0.028430403796188                  |
| 0.400180784862455              |   |   |                                    |
| GSTCD 0.176067006296796 2      |   |   | 0.915730196364723                  |
| 0.224799552783687              |   |   |                                    |
| TBCK 1.97016169865572 2        |   |   | 0.373409035846647                  |
| 0.602343098645097              |   |   |                                    |
| AIMP1 8.36952715323049 2       |   |   | 0.0152258052528316                 |
| 0.198444411735833              |   |   |                                    |
| PAPSS1 3.32605955211502 2      |   |   | 0.189563773385788                  |
| 0.19872743099799               |   |   |                                    |
| CYP2U1 0.16405465111034 2      |   |   | 0.921246784772562                  |
| 0.194975589923397              |   |   |                                    |



|            |                     |   |                      |
|------------|---------------------|---|----------------------|
| HADH       | 2.80999238641079    | 2 | 0.245367990516691    |
|            | 0.224376524217871   |   |                      |
| RPL34      | 54.4623564893574    | 2 | 1.4915846335839e-12  |
|            | 0.155731925759586   |   |                      |
| OSTC       | 0.229697027388193   | 2 | 0.891501183899276    |
|            | 0.0460112095165329  |   |                      |
| SEC24B     | 0.411548961184977   | 2 | 0.814016632133023    |
|            | 0.324888196634529   |   |                      |
| MCUB       | 47.7022376039749    | 2 | 4.38117320200604e-11 |
|            | 0.806584894795094   |   |                      |
| CASP6      | 6.38482071874342    | 2 | 0.041072751438896    |
|            | 0.492898336174559   |   |                      |
| PLA2G12A   | 0.856858810850935   | 2 | 0.651531583525669    |
|            | 0.443048084203152   |   |                      |
| GAR1       | 0.101695945592687   | 2 | 0.950423149723508    |
|            | 0.0618735247988778  |   |                      |
| FAM241A    | 59.7507990123473    | 2 | 1.06026298851702e-13 |
|            | 1.28738451077966    |   |                      |
| AC109347.1 | 0.0298449862908357  | 2 | 0.985188295489927    |
|            | 0.174695284858681   |   |                      |
| AP1AR      | 4.17463337175078    | 2 | 0.124019472939066    |
|            | 1.2143464073952     |   |                      |
| TIFA       | 22.6762567475613    | 2 | 1.19100452677934e-05 |
|            | 0.52881398390796    |   |                      |
| ALPK1      | 6.00092059703356    | 2 | 0.0497641567276409   |
|            | 0.823720479712765   |   |                      |
| ZGRF1      | 0.195097566561584   | 2 | 0.907058091206914    |
|            | 0.327023638378449   |   |                      |
| LARP7      | 5.42069091515097    | 2 | 0.0665138250409136   |
|            | 0.241775243211536   |   |                      |
| CAMK2D     | 2.12592755800902    | 2 | 0.345430512002756    |
|            | 0.1264526143746     |   |                      |
| UGT8       | 0.315562016176049   | 2 | 0.854036788640502    |
|            | 0.209025315975679   |   |                      |
| SNHG8      | 0.0100477270380353  | 2 | 0.994988734976774    |
|            | 0.00969208916669051 |   |                      |
| METTL14    | 0.270035209846242   | 2 | 0.873700530121976    |
|            | 0.195211328836668   |   |                      |
| SEC24D     | 2.20880316467293    | 2 | 0.331409144000023    |
|            | 0.475907441489341   |   |                      |
| USP53      | 23.8281190035589    | 2 | 6.69560309296546e-06 |
|            | 1.39047312605605    |   |                      |
| C4orf3     | 179.534830871299    | 2 | 0.940618838207383    |
| MAD2L1     | 0.634940266049365   | 2 | 0.727988423261888    |
|            | 0.239103347935526   |   |                      |
| ANXA5      | 3.07080069012374    | 2 | 0.215369451811633    |
|            | 0.211202783707394   |   |                      |
| EXOSC9     | 4.76430630248764    | 2 | 0.0923515165003963   |
|            | 0.48572420729534    |   |                      |
| CCNA2      | 1.6956208627435     | 2 | 0.428351811581794    |

|                  |                    |   |                                    |
|------------------|--------------------|---|------------------------------------|
| 1.47292045554283 |                    |   |                                    |
| BBS7             | 2.04744763718118   | 2 | 0.35925464708415 0.637404869179358 |
| KIAA1109         | 1.025507185334     | 2 | 0.598844333062327                  |
|                  | 0.37420383227369   |   |                                    |
| NUDT6            | 4.13175645921566   | 2 | 0.126706963882755                  |
|                  | 16.3201055542446   |   |                                    |
| SPATA5           | 0.640209552036228  | 2 | 0.726072958054727                  |
|                  | 0.762819347513283  |   |                                    |
| MFSD8            | 1.44903476975811   | 2 | 0.484558367728658                  |
|                  | 0.406605414520236  |   |                                    |
| ABHD18           | 0.0963700862367037 | 2 | 0.952957432546437                  |
|                  | 0.139132542920097  |   |                                    |
| LARP1B           | 2.72393341409654   | 2 | 0.256156496443068                  |
|                  | 0.670981904628416  |   |                                    |
| PGRMC2           | 1.79135799364585   | 2 | 0.40833024954978 0.285954666377552 |
| JADE1            | 10.1826988024513   | 2 | 0.00614971585158341                |
|                  | 0.490749796100128  |   |                                    |
| SCLT1            | 0.404982316012622  | 2 | 0.81669370376676                   |
|                  | 0.28152761293238   |   |                                    |
| C4orf33          | 1.21288012323546   | 2 | 0.545288611764202                  |
|                  | 0.455013057941448  |   |                                    |
| ELF2             | 2.03771181348073   | 2 | 0.36100773050388 0.372688576128231 |
| NDUFC1           | 3.94379790879776   | 2 | 0.139192285288054                  |
|                  | 0.101348793227687  |   |                                    |
| NAA15            | 6.29015881250329   | 2 | 0.0430635043995951                 |
|                  | 0.464912811116298  |   |                                    |
| AC097376.2       | 0.246925501093602  | 2 | 0.883854563730109                  |
|                  | 0.113355660000644  |   |                                    |
| RAB33B           | 7.30195731139829   | 2 | 0.0259657048551118                 |
|                  | 2.22735006288422   |   |                                    |
| SETD7            | 2.76234798301998   | 2 | 0.251283375276377                  |
|                  | 0.798931649229095  |   |                                    |
| MGST2            | 5.89132482707458   | 2 | 0.0525672270378877                 |
|                  | 0.491642973177036  |   |                                    |
| MAML3            | 0.31684809880924   | 2 | 0.853487784234689                  |
|                  | 0.0830374138914356 |   |                                    |
| SCOC             | 2.04311770024026   | 2 | 0.360033264605024                  |
|                  | 0.147041140832418  |   |                                    |
| SCOC-AS1         | 0.339018459641763  | 2 | 0.844078963746764                  |
|                  | 0.140210842068238  |   |                                    |
| ELMOD2           | 0.595323215426713  | 2 | 0.742552571300523                  |
|                  | 0.30887989798229   |   |                                    |
| ZNF330           | 2.17222977228994   | 2 | 0.337525273798318                  |
|                  | 0.210451438991624  |   |                                    |
| USP38            | 0.74512280917736   | 2 | 0.688967344502567                  |
|                  | 0.462556513833533  |   |                                    |
| SMARCA5          | 0.631229912783042  | 2 | 0.729340223900709                  |
|                  | 0.118780884266422  |   |                                    |
| ANAPC10          | 1.57171159386604   | 2 | 0.455729522924512                  |
|                  | 0.278307380787535  |   |                                    |

|            |                    |   |                      |
|------------|--------------------|---|----------------------|
| ABCE1      | 3.23418463368493   | 2 | 0.198474963188546    |
|            | 0.352118019202037  |   |                      |
| OTUD4      | 0.802569105952152  | 2 | 0.669459537228481    |
|            | 0.35494576619386   |   |                      |
| MMAA       | 2.78218581069997   | 2 | 0.248803237597527    |
|            | 1.57776996962398   |   |                      |
| ZNF827     | 0.522696782872262  | 2 | 0.770012607080878    |
|            | 0.207496647455939  |   |                      |
| AC108206.1 | 2.59913213708332   | 2 | 0.272650078814513    |
|            | 0.453935434854682  |   |                      |
| LSM6       | 2.8018798722372    | 2 | 0.24636528744607     |
| SLC10A7    | 7.26707369555016   | 2 | 0.0891755252837596   |
|            | 0.0264225663550579 |   |                      |
|            | 1.11651504344794   |   |                      |
| TMEM184C   | 1.28834209597337   | 2 | 0.525097642490937    |
|            | 0.378481388773536  |   |                      |
| PRMT9      | 0.170913643170355  | 2 | 0.918092783989409    |
|            | 0.0878215857010487 |   |                      |
| ARHGAP10   | 1.21986363459569   | 2 | 0.543387917467988    |
|            | 0.578770441310141  |   |                      |
| LRBA       | 1.01745188886707   | 2 | 0.601261131121625    |
|            | 0.179555719746555  |   |                      |
| RPS3A      | 56.0676642991029   | 2 | 6.68465283126807e-13 |
|            | 0.273132861676087  |   |                      |
| AC095055.1 | 2.01946991448702   | 2 | 0.364315525967731    |
|            | 1.23710409134084   |   |                      |
| GATB       | 2.74239531386205   | 2 | 0.253802808761977    |
|            | 0.387617532631136  |   |                      |
| FBXW7      | 1.5890064547534    | 2 | 0.451805623847821    |
|            | 0.291544920108967  |   |                      |
| TMEM154    | 54.7771388894152   | 2 | 1.27442500996722e-12 |
|            | 0.787924512120615  |   |                      |
| AC106882.1 | 3.60759289484161   | 2 | 0.164672529405201    |
|            | 1.66212874918241   |   |                      |
| ARFIP1     | 1.91361803305553   | 2 | 0.384116642300603    |
|            | 0.469173036454871  |   |                      |
| MND1       | 11.4286569621968   | 2 | 0.00329836469237776  |
|            | 2.51729490754132   |   |                      |
| TMEM131L   | 6.32949429350484   | 2 | 0.0422248171465474   |
|            | 0.53021401822838   |   |                      |
| PLRG1      | 0.395661187409547  | 2 | 0.82050884072772     |
|            | 0.102650957112784  |   |                      |
| MAP9       | 9.4782595640645    | 2 | 0.00874625402215568  |
|            | 1.52541038995177   |   |                      |
| CTS0       | 0.695323238890643  | 2 | 0.706337846772991    |
|            | 0.572846927088867  |   |                      |
| C4orf46    | 0.215508280361825  | 2 | 0.897848314120595    |
|            | 0.298519661523768  |   |                      |
| ETFDH      | 0.760623666021875  | 2 | 0.683648191895884    |
|            | 0.31938391151855   |   |                      |
| PPID       | 0.35916079103758   | 2 | 0.835620768077432    |

|                               |   |                      |
|-------------------------------|---|----------------------|
| 0.0722404759739022            |   |                      |
| RAPGEF2 1.61572333760583 2    |   | 0.445810337877461    |
| 1.0035893641596               |   |                      |
| NAF1 0.11547429347565 2       |   | 0.943898021505944    |
| 0.139774946356487             |   |                      |
| TMA16 2.8332175064989 2       |   | 0.242535120266539    |
| 0.263843959513548             |   |                      |
| MARCH1 53.356212161646 2      |   | 2.59325894091944e-12 |
| 1.49335560538735              |   |                      |
| TRIM61 0.10149283213252 2     |   | 0.950519676492178    |
| 0.104774637970957             |   |                      |
| TMEM192 1.67464874930564 2    |   | 0.432867165728908    |
| 0.433335258042092             |   |                      |
| KLHL2 0.336178224184666       | 2 | 0.845278506792051    |
| 0.248909184542008             |   |                      |
| MSM01 1.57674154962061 2      |   | 0.454584813319364    |
| 0.0832231074689872            |   |                      |
| DDX60L 0.509446786278801      | 2 | 0.775130874828498    |
| 0.668025279904033             |   |                      |
| PALLD 0.020228607948765       | 2 | 0.989936673585785    |
| 0.0960216600868815            |   |                      |
| CBR4 2.58597331043524 2       |   | 0.274449870670578    |
| 0.28577222327174              |   |                      |
| SH3RF1 0.288288080521647      | 2 | 0.865763034344244    |
| 0.204960521490256             |   |                      |
| NEK1 0.00361913802586392      | 2 | 0.998192067269937    |
| 0.0255459725431258            |   |                      |
| CLCN3 0.745646920111009       | 2 | 0.688786820498161    |
| 0.307321300911955             |   |                      |
| HPF1 1.90823182454872 2       |   | 0.385152502677706    |
| 0.278141049730713             |   |                      |
| GALNT7 0.0625418097018985     | 2 | 0.969212973011825    |
| 0.120234864773079             |   |                      |
| HMGB2 22.6505651158685 2      |   | 1.20640264053007e-05 |
| 0.539452779703788             |   |                      |
| AC097534.2 3.18633562647285 2 |   | 0.203280635603441    |
| 2.44834368726638              |   |                      |
| SAP30 0.00466613862947147     | 2 | 0.997669650176147    |
| 0.0276572036552855            |   |                      |
| SCRG1 1.67764516142518 2      |   | 0.432219127087064    |
| 1.94622794303796              |   |                      |
| FBX08 1.06722971285024 2      |   | 0.586481088297744    |
| 0.319729440814518             |   |                      |
| CEP44 0.883722284765646       | 2 | 0.642838892335207    |
| 0.436884603912765             |   |                      |
| GLRA3 10.2583173889793 2      |   | 0.00592154020305402  |
| 1.99724387123405              |   |                      |
| GPM6A 8.13788760410788 2      |   | 0.0170954351388802   |
| 3.96313133888005              |   |                      |
| SPCS3 0.0460741893731518      | 2 | 0.977226233200095    |

|                    |                    |   |                      |
|--------------------|--------------------|---|----------------------|
| 0.0389657585273802 |                    |   |                      |
| AGA                | 0.0265637589831274 | 2 | 0.986805935457395    |
| 0.0493319588638691 |                    |   |                      |
| DCTD               | 0.309710137815531  | 2 | 0.856539307665637    |
| 0.103008277260558  |                    |   |                      |
| CDKN2AIP           | 0.878728402744881  | 2 | 0.644446028755964    |
| 0.285811713527549  |                    |   |                      |
| ING2               | 0.544482783989912  | 2 | 0.761670377764762    |
| 0.20068591641942   |                    |   |                      |
| RWDD4              | 0.398192552341628  | 2 | 0.819470994005528    |
| 0.109562727929835  |                    |   |                      |
| TRAPPC11           | 0.448764193030178  | 2 | 0.799009777183738    |
| 0.12579070330351   |                    |   |                      |
| IRF2               | 8.08013016042804   | 2 | 0.017596327205618    |
| 0.244286886718839  |                    |   |                      |
| CASP3              | 0.100139943621022  | 2 | 0.951162867584252    |
| 0.0593775433958209 |                    |   |                      |
| PRIMPOL            | 0.348337094983073  | 2 | 0.8401552796592      |
| 0.255572666412951  |                    |   |                      |
| CENPU              | 2.47814474989478   | 2 | 0.289652782533807    |
| 0.517170565048417  |                    |   |                      |
| ACSL1              | 2.00577879179534   | 2 | 0.36681802598607     |
| SLC25A4            | 18.4089460601751   | 2 | 0.581519020392359    |
| 0.364666065766252  |                    |   | 0.000100588458845308 |
| CFAP97             | 1.05956837938889   | 2 | 0.588732010404569    |
| 0.230421322523238  |                    |   |                      |
| SNX25              | 6.81408851780908   | 2 | 0.033139006082649    |
| 1.45397166145186   |                    |   |                      |
| LRP2BP             | 2.269478604912     | 2 | 0.321505926215399    |
| 1.21257811355599   |                    |   |                      |
| ANKRD37            | 2.77056715407015   | 2 | 0.250252823774803    |
| 0.480004004880841  |                    |   |                      |
| UFSP2              | 0.554328411176397  | 2 | 0.757930030545256    |
| 0.175540294269787  |                    |   |                      |
| CCDC110            | 1.67593160020052   | 2 | 0.432589602740947    |
| 3.13253172512525   |                    |   |                      |
| AC106897.1         | 0.109378120493856  | 2 | 0.94677949357118     |
| 0.233266200038504  |                    |   |                      |
| CYP4V2             | 0.190476382779841  | 2 | 0.909156355459666    |
| 0.357030224711594  |                    |   |                      |
| FRG1               | 4.47911936201342   | 2 | 0.106505390402374    |
| 0.192924111904302  |                    |   |                      |
| CCDC127            | 7.76166875262665   | 2 | 0.0206336018087168   |
| 0.472796776709203  |                    |   |                      |
| SDHA               | 12.924441374647    | 2 | 0.00156132464389935  |
| 0.44293172455439   |                    |   |                      |
| PDCD6              | 0.648618756921018  | 2 | 0.723026518942683    |
| 0.0777382447093897 |                    |   |                      |
| EXOC3-AS1          | 6.10653514885493   | 2 | 0.047204428132364    |
| 1.56461727950525   |                    |   |                      |

|            |                    |   |                     |
|------------|--------------------|---|---------------------|
| EXOC3      | 4.94627513516728   | 2 | 0.0843198841954507  |
|            | 0.547668168907537  |   |                     |
| SLC9A3     | 0.0330387999081296 | 2 | 0.983616297094594   |
|            | 0.105429137183274  |   |                     |
| BRD9       | 1.6178872782114    | 2 | 0.445328245183223   |
|            | 0.284202024200279  |   |                     |
| CLPTM1L    | 1.40997657272123   | 2 | 0.494114362099696   |
|            | 0.252310339217517  |   |                     |
| LPCAT1     | 12.2601449980945   | 2 | 0.00217642316638933 |
|            | 0.89949536691802   |   |                     |
| MRPL36     | 0.185631827134515  | 2 | 0.911361254097274   |
|            | 0.0456119417919113 |   |                     |
| NDUFS6     | 7.80921329122141   | 2 | 0.0201488785825281  |
|            | 0.239220742009907  |   |                     |
| ICE1       | 0.149392493282666  | 2 | 0.928025334332478   |
|            | 0.109480568484916  |   |                     |
| MED10      | 4.42463248399172   | 2 | 0.109446849310104   |
|            | 0.227053824772486  |   |                     |
| NSUN2      | 1.08969963103175   | 2 | 0.579928873118556   |
|            | 0.238395400145273  |   |                     |
| SRD5A1     | 0.0332879309162165 | 2 | 0.983493780065617   |
|            | 0.0611688141813509 |   |                     |
| TENT4A     | 0.938821643518763  | 2 | 0.625370614519649   |
|            | 0.888358937423029  |   |                     |
| MTRR       | 0.468068081641813  | 2 | 0.791334877748238   |
|            | 0.22576622504946   |   |                     |
| FASTKD3    | 0.397567382978845  | 2 | 0.819727188124191   |
|            | 0.259879993808205  |   |                     |
| MIR4458HG  | 0.774927181346896  | 2 | 0.678776347591209   |
|            | 0.404754929524002  |   |                     |
| FAM173B    | 0.784041427559706  | 2 | 0.675690117719322   |
|            | 0.495007100778968  |   |                     |
| CCT5       | 1.31132266998707   | 2 | 0.519098650941531   |
|            | 0.049204528737073  |   |                     |
| MARCH6     | 3.01219151851429   | 2 | 0.221774149565106   |
|            | 0.342013793234256  |   |                     |
| ANKRD33B   | 0.521422826904417  | 2 | 0.77050324440493    |
|            | 0.158112915666314  |   |                     |
| DAP        | 0.130214697687162  | 2 | 0.936966875667936   |
|            | 0.0286451935588629 |   |                     |
| TRIO       | 10.817751040002    | 2 | 0.00447667130948326 |
|            | 3.17739066285384   |   |                     |
| OTULINL    | 0.627864759644238  | 2 | 0.730568427656237   |
|            | 0.556125692031483  |   |                     |
| AC010491.1 | 3.88184769634253   | 2 | 0.14357125045295    |
|            | 2.70866806410498   |   |                     |
| OTULIN     | 5.41659221457219   | 2 | 0.0666502749365707  |
|            | 0.388169971765185  |   |                     |
| ANKH       | 2.64870672943574   | 2 | 0.265974892243399   |
|            | 0.625706671435141  |   |                     |

|            |                    |   |                      |
|------------|--------------------|---|----------------------|
| ZNF622     | 1.759384883062     | 2 | 0.414910501298493    |
|            | 0.126272591347688  |   |                      |
| BASP1      | 32.7828626254006   | 2 | 7.60837360891387e-08 |
|            | 0.358318977663287  |   |                      |
| DROSHA     | 2.73610852519418   | 2 | 0.25460186629148     |
| C5orf22    | 2.12979603033808   | 2 | 0.935061410913263    |
|            | 0.391529401281339  |   | 0.344763013572017    |
| GOLPH3     | 1.08943317450864   | 2 | 0.580006141181176    |
|            | 0.248841759413363  |   |                      |
| AC025181.2 | 0.251275518940056  | 2 | 0.881934261261688    |
|            | 0.317918270830895  |   |                      |
| MTMR12     | 6.87551456702077   | 2 | 0.0321366780258097   |
|            | 0.650387850254253  |   |                      |
| ZFR        | 2.03364305032395   | 2 | 0.361742905540192    |
|            | 0.223342127091049  |   |                      |
| SUB1       | 139.806243126786   | 2 | 0                    |
|            |                    |   | 0.630047375798525    |
| TARS       | 4.99307010008602   | 2 | 0.0823699123572111   |
|            | 0.487031726638449  |   |                      |
| RAD1       | 2.06038359085877   | 2 | 0.356938494831769    |
|            | 0.426150198275906  |   |                      |
| BRIX1      | 1.95495799291236   | 2 | 0.376258453101612    |
|            | 0.243450169535021  |   |                      |
| DNAJC21    | 0.0597051106304909 | 2 | 0.970588631133504    |
|            | 0.0578757716047357 |   |                      |
| LMBRD2     | 2.80161045102958   | 2 | 0.24639847769819     |
|            |                    |   | 0.836400054564204    |
| SKP2       | 0.316785009747238  | 2 | 0.853514707531197    |
|            | 0.37668107311187   |   |                      |
| NADK2      | 0.500211126624845  | 2 | 0.778718574620201    |
|            | 0.31748015122255   |   |                      |
| NIPBL      | 9.18033387787398   | 2 | 0.0101511636074506   |
|            | 0.53078818523423   |   |                      |
| CPLANE1    | 2.29265665698119   | 2 | 0.317801492515905    |
|            | 0.909696710847347  |   |                      |
| NUP155     | 1.53435900891374   | 2 | 0.464320838019163    |
|            | 0.396563788275421  |   |                      |
| WDR70      | 0.220660115767887  | 2 | 0.895538506967382    |
|            | 0.109925006376583  |   |                      |
| RICTOR     | 4.47624984335136   | 2 | 0.106658309680006    |
|            | 0.439679476662568  |   |                      |
| TTC33      | 0.555628838590151  | 2 | 0.757437374233842    |
|            | 0.0999532512558942 |   |                      |
| PTGER4     | 1.0768126271841    | 2 | 0.583677710778945    |
|            | 0.53581566147025   |   |                      |
| PRKAA1     | 2.36819995298156   | 2 | 0.306021482118946    |
|            | 0.404689597514469  |   |                      |
| RPL37      | 64.2402663294101   | 2 | 1.12132525487141e-14 |
|            | 0.266692291001077  |   |                      |
| CARD6      | 0.0035898016053507 | 2 | 0.99820670906844     |
|            | 0.0498576137746733 |   |                      |
| OXCT1      | 1.782673181052     | 2 | 0.410107240813358    |

|                              |   |                                    |
|------------------------------|---|------------------------------------|
| 0.351080717002728            |   |                                    |
| C5orf51 0.376996930877253    | 2 | 0.828201774364119                  |
| 0.270127765209488            |   |                                    |
| FBX04 0.0955170301737415     | 2 | 0.953363982300496                  |
| 0.105813968006937            |   |                                    |
| CCDC152 0.925372946309708    | 2 | 0.629589994932183                  |
| 0.227446818084794            |   |                                    |
| ANXA2R 0.141648528221334     | 2 | 0.931625597795644                  |
| 0.133196897724913            |   |                                    |
| AC025171.2 0.393501893669335 | 2 | 0.821395178909533                  |
| 0.576057423534971            |   |                                    |
| ZNF131 0.950128601441342     | 2 | 0.621845070093305                  |
| 0.247232418501522            |   |                                    |
| HMGCS1 2.8486915860374 2     |   | 0.240665857002481                  |
| 0.278395296349323            |   |                                    |
| CCL28 1.68493038005282 2     |   | 0.430647585662521                  |
| 0.858542013197592            |   |                                    |
| TMEM267 0.509705600282049    | 2 | 0.775030573956078                  |
| 0.254052056807122            |   |                                    |
| C5orf34 3.20731702708738 2   |   | 0.201159226367221                  |
| 2.4934277017659              |   |                                    |
| PAIP1 0.348187376735503      | 2 | 0.840218175301405                  |
| 0.110954907472412            |   |                                    |
| NNT-AS1 3.61096054396498 2   |   | 0.164395483069725                  |
| 0.433846966640416            |   |                                    |
| NNT 3.07184631276269 2       |   | 0.215256883652875                  |
| 0.54579330048712             |   |                                    |
| MRPS30 3.08162823173974 2    |   | 0.214206641395082                  |
| 0.306770800331937            |   |                                    |
| EMB 5.39456744686463 2       |   | 0.0673883096503143                 |
| 0.301380502091044            |   |                                    |
| PARP8 0.54078159687399 2     |   | 0.763081225109002                  |
| 0.192235567306956            |   |                                    |
| PELO 3.26989953309839 2      |   | 0.194962164675511                  |
| 0.717698203418437            |   |                                    |
| MOCS2 1.48564255865271 2     |   | 0.47576974093244 0.153228435893836 |
| NDUFS4 0.225937212406771     | 2 | 0.893178699946321                  |
| 0.0707997876078997           |   |                                    |
| ARL15 2.06563238872596 2     |   | 0.35600297395352 0.897716159404593 |
| DHX29 0.383340716623103      | 2 | 0.825578968886653                  |
| 0.133668681952203            |   |                                    |
| MTREX 1.75048947577745 2     |   | 0.416760010231221                  |
| 0.273509607597979            |   |                                    |
| PLPP1 4.35662690191523 2     |   | 0.113232341586481                  |
| 0.682803398009973            |   |                                    |
| SLC38A9 11.7590840556813 2   |   | 0.00279606550201605                |
| 1.04967192839581             |   |                                    |
| IL6ST 0.884271079517446      | 2 | 0.642662523228741                  |
| 0.926115168438332            |   |                                    |
| MAP3K1 1.32735438177762 2    |   | 0.514954263557256                  |



|                             |   |                                   |
|-----------------------------|---|-----------------------------------|
| 0.391024705923493           |   |                                   |
| SETD9 1.82121382872809 2    |   | 0.402280000419101                 |
| 0.670866081708108           |   |                                   |
| MIER3 0.830341762749973     | 2 | 0.660227450490423                 |
| 0.553906053502441           |   |                                   |
| GPBP1 0.480057427620992     | 2 | 0.786605274307497                 |
| 0.0682237618125173          |   |                                   |
| GAPT 2.62376371553018 2     |   | 0.269312770885688                 |
| 0.896690067570412           |   |                                   |
| PDE4D 6.63325953634272 2    |   | 0.0362748807294661                |
| 0.77403869573666            |   |                                   |
| DEPDC1B 3.68674079524533 2  |   | 0.158283049268603                 |
| 1.47517755129494            |   |                                   |
| ERCC8 0.219710425779476     | 2 | 0.895963849922528                 |
| 0.207215378237506           |   |                                   |
| NDUFAF2 3.77338062022915 2  |   | 0.151572638011502                 |
| 0.306589584740009           |   |                                   |
| SMIM15 0.204059065133458    | 2 | 0.903002883282179                 |
| 0.07714766832849            |   |                                   |
| ZSWIM6 0.962086380869562    | 2 | 0.618138219467922                 |
| 0.704608480589713           |   |                                   |
| KIF2A 15.8199128174706 2    |   | 0.000367070581317241              |
| 0.682229245189508           |   |                                   |
| DIMT1 0.580942973345679     | 2 | 0.747910854434988                 |
| 0.12837685621532            |   |                                   |
| IP011 0.0299000785768389    | 2 | 0.985161157726028                 |
| 0.174865585175932           |   |                                   |
| SREK1IP1 1.50015462036711 2 |   | 0.472330035407715                 |
| 0.190518267668041           |   |                                   |
| CWC27 0.000924380049257316  | 2 | 0.999537916768727                 |
| 0.00508244773189739         |   |                                   |
| CENPK 0.0412117074789908    | 2 | 0.979604996134011                 |
| 0.081718456068699           |   |                                   |
| PPWD1 0.179088169729538     | 2 | 0.914347955329823                 |
| 0.094120319280796           |   |                                   |
| TRIM23 0.0039556959796778   | 2 | 0.998024106662616                 |
| 0.0454839387246929          |   |                                   |
| TRAPPC13 7.10879277597445 2 |   | 0.0285986321853459                |
| 0.427051797092718           |   |                                   |
| SHLD3 0.0316239105740662    | 2 | 0.98431239739557                  |
| 0.114184937403088           |   |                                   |
| SGTB 0.1482505369547 2      |   | 0.928555367838385                 |
| 0.147276757387019           |   |                                   |
| NLN 3.726050343881 2        |   | 0.15520240550884 1.62052227802997 |
| ERBIN 2.89702517552516 2    |   | 0.234919450420628                 |
| 0.192588792866553           |   |                                   |
| SREK1 8.54818728902001 2    |   | 0.0139246636966347                |
| 0.3704408525851             |   |                                   |
| MAST4 1.483411671491 2      |   | 0.476300731325785                 |
| 0.584529311638567           |   |                                   |

|            |                      |   |                      |
|------------|----------------------|---|----------------------|
| CD180      | 4.05824997597221     | 2 | 0.131450491600277    |
|            | 0.307760376746986    |   |                      |
| PIK3R1     | 1.26586463630929     | 2 | 0.531032359905919    |
|            | 0.345902610454857    |   |                      |
| SLC30A5    | 0.00691459839705261  | 2 | 0.996548670378828    |
|            | 0.0194979245358417   |   |                      |
| AC010273.1 | 0.020143545282839    | 2 | 0.98997877780743     |
|            | 0.13597368162743     |   |                      |
| CCNB1      | 5.02364049786019     | 2 | 0.0811204453669903   |
|            | 0.332081222369004    |   |                      |
| CENPH      | 7.54042476577714     | 2 | 0.0230471679432992   |
|            | 0.748532966156651    |   |                      |
| MRPS36     | 18.6005779300879     | 2 | 9.13978168877172e-05 |
|            | 0.456472480574355    |   |                      |
| CDK7       | 0.0399693785205396   | 2 | 0.980213680988415    |
|            | 0.0581408931474552   |   |                      |
| CCDC125    | 1.17773229033419     | 2 | 0.55495616786903     |
|            | 0.606971420639449    |   | 0.386811096271233    |
| AK6        | 0.0814830926101192   | 2 | 0.738240438276256    |
|            | 0.0814830926101192   |   |                      |
| TAF9       | 7.35283448277842     | 2 | 0.0253135047420715   |
|            | 0.277459180897076    |   |                      |
| RAD17      | 2.42915909501113     | 2 | 0.296834792989598    |
|            | 0.200271695399016    |   |                      |
| OCLN       | 0.0426317428579779   | 2 | 0.978909706121353    |
|            | 0.161852944544982    |   |                      |
| GTF2H2C    | 1.02690689639142     | 2 | 0.598425375167096    |
|            | 0.525850882977855    |   |                      |
| SMN2       | 1.00639031018065     | 2 | 0.604595792933623    |
|            | 0.988670897349882    |   |                      |
| SERF1A     | 1.65385425948929     | 2 | 0.437391270018257    |
|            | 1.05127658081961     |   |                      |
| SMN1       | 1.24458615302825     | 2 | 0.536712303068195    |
|            | 0.697403139438362    |   |                      |
| NAIP       | 0.0670331241419614   | 2 | 0.967038894931953    |
|            | 0.126175020119576    |   |                      |
| GTF2H2     | 0.451148846983239    | 2 | 0.798057663999804    |
|            | 0.238240053659751    |   |                      |
| BDP1       | 1.51940312736821e-05 | 2 | 0.99999240301322     |
|            | 0.0006674018511991   |   |                      |
| MCCC2      | 0.772013129465502    | 2 | 0.679766063183135    |
|            | 0.232997938838695    |   |                      |
| MAP1B      | 1.43809090445589     | 2 | 0.487217106066962    |
|            | 0.687038445887371    |   |                      |
| MRPS27     | 5.74422626656772     | 2 | 0.0565792406915855   |
|            | 0.303277272611337    |   |                      |
| PTCD2      | 0.0438550705336419   | 2 | 0.978311125537327    |
|            | 0.138960321913797    |   |                      |
| TNP01      | 8.24733361236773     | 2 | 0.0161850580301277   |
|            | 0.296893912516852    |   |                      |
| BTF3       | 76.9718991512543     | 2 | 0.260242786099252    |

|            |                     |   |                      |
|------------|---------------------|---|----------------------|
| ANKRA2     | 2.31145696523805    | 2 | 0.314828106541948    |
|            | 0.420598265422089   |   |                      |
| UTP15      | 1.62225469894968    | 2 | 0.444356838298209    |
|            | 0.599820390885746   |   |                      |
| HEXB       | 0.0990632999698173  | 2 | 0.951675037159236    |
|            | 0.113719262697131   |   |                      |
| GFM2       | 0.221125693141553   | 2 | 0.895330059997326    |
|            | 0.0738087147562431  |   |                      |
| NSA2       | 1.07139469546167    | 2 | 0.585261017364886    |
|            | 0.0512267977603073  |   |                      |
| HMGCR      | 2.92589611247286    | 2 | 0.231552637327596    |
|            | 0.510671211401431   |   |                      |
| COL4A3BP   | 1.00674577313056    | 2 | 0.604488346780159    |
|            | 0.279670025685138   |   |                      |
| POLK       | 0.161149131789465   | 2 | 0.922586107560292    |
|            | 0.120002406042815   |   |                      |
| POC5       | 0.0471334219202828  | 2 | 0.976708815312598    |
|            | 0.0740570488430899  |   |                      |
| IQGAP2     | 23.2641499985135    | 2 | 8.87675052985148e-06 |
|            | 3.32905556150275    |   |                      |
| S100Z      | 2.25279033475761    | 2 | 0.324199838646269    |
|            | 0.574716579980772   |   |                      |
| AGGF1      | 0.00323355298484983 | 2 | 0.998384529786606    |
|            | 0.0260654851389197  |   |                      |
| PDE8B      | 4.08272049006593    | 2 | 0.129851960209673    |
|            | 3.00713019483101    |   |                      |
| WDR41      | 3.72844236143329    | 2 | 0.155016893029164    |
|            | 0.516510774289077   |   |                      |
| TBCA       | 42.0923905858785    | 2 | 7.24024951104241e-10 |
|            | 0.461200425595765   |   |                      |
| AP3B1      | 16.2562205175974    | 2 | 0.000295125384772388 |
|            | 0.634776133096426   |   |                      |
| SCAMP1-AS1 | 0.902888228084819   | 2 | 0.636708008409958    |
|            | 0.428352325462363   |   |                      |
| SCAMP1     | 1.67841496748906    | 2 | 0.432052796647185    |
|            | 0.443028636910481   |   |                      |
| LHFPL2     | 0.104111278241466   | 2 | 0.949276048488849    |
|            | 0.0765788932739288  |   |                      |
| ARSB       | 0.294194185940109   | 2 | 0.863210161709046    |
|            | 0.441550558667125   |   |                      |
| JMY        | 2.37087750883222    | 2 | 0.305612061436846    |
|            | 0.852794972092618   |   |                      |
| HOMER1     | 3.03324747396023    | 2 | 0.219451563777256    |
|            | 1.25627572868001    |   |                      |
| TENT2      | 0.0964853649684195  | 2 | 0.952902506267308    |
|            | 0.0719328540320422  |   |                      |
| MTX3       | 0.0158199101815564  | 2 | 0.992121246282638    |
|            | 0.0727526730478331  |   |                      |
| SERINC5    | 1.76241320113602    | 2 | 0.414282736201437    |
|            | 0.99070407825485    |   |                      |

|              |                    |   |                      |                   |
|--------------|--------------------|---|----------------------|-------------------|
| ZFYVE16      | 1.95838002545744   | 2 | 0.375615219214424    |                   |
|              | 0.420283356620968  |   |                      |                   |
| ANKRD34B     | 2.67843856583592   | 2 | 0.262050175787393    |                   |
|              | 0.983695241091549  |   |                      |                   |
| DHFR         | 3.02955008656785   | 2 | 0.219857637737362    |                   |
|              | 0.388090529921313  |   |                      |                   |
| MSH3         | 0.520124859606787  | 2 | 0.771003450707206    |                   |
|              | 0.256198126870367  |   |                      |                   |
| CKMT2-AS1    | 2.18635802852336   | 2 | 0.335149353803435    |                   |
|              | 0.869605647447171  |   |                      |                   |
| ZCCHC9       | 2.1316019910896    | 2 | 0.3444518398495      | 0.30554326139584  |
| SSBP2        | 1.55549896097949   | 2 | 0.45943882472474     | 0.155835830598348 |
| ATG10        | 0.290203848104248  | 2 | 0.864934131026444    |                   |
|              | 0.226196803111619  |   |                      |                   |
| RPS23        | 66.3814232200633   | 2 | 3.88578058618805e-15 |                   |
|              | 0.289272176366289  |   |                      |                   |
| ATP6AP1L     | 1.76117366910508   | 2 | 0.414539574143625    |                   |
|              | 0.899523135217733  |   |                      |                   |
| TMEM167A     | 0.356234048763167  | 2 | 0.836844486549855    |                   |
|              | 0.0863925137535353 |   |                      |                   |
| XRCC4        | 0.429276361930857  | 2 | 0.806833315022307    |                   |
|              | 0.0773827884546986 |   |                      |                   |
| COX7C        | 12.9658859481806   | 2 | 0.0015293033499657   |                   |
|              | 0.167569982287453  |   |                      |                   |
| RASA1        | 0.83310245083016   | 2 | 0.659316738156805    |                   |
|              | 0.523669075837356  |   |                      |                   |
| CCNH         | 1.1453210051401    | 2 | 0.564022856514638    |                   |
|              | 0.0949781574340652 |   |                      |                   |
| TMEM161B     | 1.6573577378693    | 2 | 0.436625745284796    |                   |
|              | 0.741004107734062  |   |                      |                   |
| TMEM161B-AS1 | 1.01034911299789   | 2 | 0.603400238800564    |                   |
|              | 0.265174369728999  |   |                      |                   |
| MEF2C        | 32.0033744128654   | 2 | 1.12345464708952e-07 |                   |
|              | 0.400359530560066  |   |                      |                   |
| MEF2C-AS1    | 0.0450091939423442 | 2 | 0.977746742509416    |                   |
|              | 0.0964454056027667 |   |                      |                   |
| CETN3        | 1.63489733367603   | 2 | 0.44155677706266     | 0.216105022847696 |
| MBLAC2       | 0.905444623164735  | 2 | 0.635894689701655    |                   |
|              | 0.766774387047692  |   |                      |                   |
| LYSMD3       | 1.3848210420113    | 2 | 0.500368465477292    |                   |
|              | 0.307579314465589  |   |                      |                   |
| ARRDC3       | 0.230245549820527  | 2 | 0.89125671322631     |                   |
|              | 0.125693841430952  |   |                      |                   |
| ARRDC3-AS1   | 0.314143831068885  | 2 | 0.85464259452865     |                   |
|              | 0.388746674205459  |   |                      |                   |
| FAM172A      | 1.44900237964605   | 2 | 0.484566215242119    |                   |
|              | 0.467534294702223  |   |                      |                   |
| POU5F2       | 0.0323219755574711 | 2 | 0.983968900336198    |                   |
|              | 0.161465451886377  |   |                      |                   |
| SLF1         | 0.472865950799879  | 2 | 0.789438792348141    |                   |

|                               |   |                                   |
|-------------------------------|---|-----------------------------------|
| 0.195740074521253             |   |                                   |
| TTC37 0.16951769704135 2      |   | 0.918733811707364                 |
| 0.0452397700525119            |   |                                   |
| ARSK 0.476429616541371        | 2 | 0.788033396820303                 |
| 0.256641297888268             |   |                                   |
| RFESD 0.0229488274860135      | 2 | 0.988591166271963                 |
| 0.095674088068826             |   |                                   |
| RHOBTB3 1.3347627456053 2     |   | 0.513050307764047                 |
| 1.28463349602542              |   |                                   |
| GLRX 53.1606450869808 2       |   | 2.85960144452702e-12              |
| 0.419956446014899             |   |                                   |
| ELL2 0.117572661599753        | 2 | 0.942908218079365                 |
| 0.234710281104391             |   |                                   |
| CAST 1.05385804215913 2       |   | 0.590415341516789                 |
| 0.154993471313003             |   |                                   |
| ERAP1 0.43582690983991 2      |   | 0.804195037778832                 |
| 0.366411636376549             |   |                                   |
| AC009126.1 6.48336479159917 2 |   | 0.0390980613211412                |
| 1.71711581827263              |   |                                   |
| ERAP2 2.84172058699857 2      |   | 0.241506161320834                 |
| 0.451622081718112             |   |                                   |
| LNPEP 4.93242144833129 2      |   | 0.0849059823920429                |
| 0.342537665348379             |   |                                   |
| RIOK2 0.441125167613101       | 2 | 0.802067440857296                 |
| 0.175381850858382             |   |                                   |
| CHD1 0.670937170050004        | 2 | 0.715002968159297                 |
| 0.235659183936122             |   |                                   |
| FAM174A 2.58352928304448 2    |   | 0.274785457175123                 |
| 0.917495645112102             |   |                                   |
| ST8SIA4 12.7899043482555 2    |   | 0.00166996572932254               |
| 0.480728545065433             |   |                                   |
| GIN1 0.00648454918768217      | 2 | 0.99676297590238                  |
| 0.0360300124838754            |   |                                   |
| PPIP5K2 8.37222942486678 2    |   | 0.0152052470136087                |
| 0.861178059789637             |   |                                   |
| C5orf30 2.17785634043616 2    |   | 0.33657705375284 1.35041316303895 |
| FBXL17 0.0272395963283141     | 2 | 0.986472531640438                 |
| 0.0909494468857488            |   |                                   |
| FER 5.59073734596832 2        |   | 0.0610923470823411                |
| 1.43431103592115              |   |                                   |
| AC008467.1 2.94769192453095 2 |   | 0.229042898731817                 |
| 1.72002893692183              |   |                                   |
| PJA2 1.57613766855051 2       |   | 0.454722091625024                 |
| 0.211705848810397             |   |                                   |
| MAN2A1 0.307632934233957      | 2 | 0.857429373056203                 |
| 0.0735429108072343            |   |                                   |
| SLC25A46 3.81160571560298 2   |   | 0.148703207153737                 |
| 0.396100503094753             |   |                                   |
| WDR36 1.06128133286696 2      |   | 0.588227991003389                 |
| 0.174484548446119             |   |                                   |

|                    |                     |   |                      |
|--------------------|---------------------|---|----------------------|
| CAMK4              | 3.61383626020746    | 2 | 0.164159275546446    |
| 1.04766614672583   |                     |   |                      |
| STARD4             | 1.95493300597174    | 2 | 0.376263153904788    |
| 0.504623104034033  |                     |   |                      |
| STARD4-AS1         | 2.5907166274345     | 2 | 0.273799740550128    |
| 2.23706727314298   |                     |   |                      |
| NREP               | 3.61397061243036    | 2 | 0.164148248335044    |
| 2.03235425989196   |                     |   |                      |
| EPB41L4A-AS1       | 7.39179095120279    | 2 | 0.0248252133333007   |
| 0.316410839585195  |                     |   |                      |
| APC                | 5.99864930503796    | 2 | 0.049820703295427    |
| 1.03284489886757   |                     |   |                      |
| SRP19              | 5.31016439748765    | 2 | 0.0702930604264832   |
| 0.19087470538931   |                     |   |                      |
| REEP5              | 81.7533211795643    | 2 | 0.424095389969624    |
| DCP2               | 3.21955266248452    | 2 | 0.199932327689805    |
| 0.354830895841088  |                     |   |                      |
| YTHDC2             | 0.00410065955572255 | 2 | 0.997951770712427    |
| 0.0163154759674782 |                     |   |                      |
| PGGT1B             | 0.0730255779869133  | 2 | 0.964145763363618    |
| 0.0579356212946347 |                     |   |                      |
| AC008494.3         | 1.43265193812431    | 2 | 0.488543888047932    |
| 1.16661010901574   |                     |   |                      |
| CCDC112            | 6.67059868394317    | 2 | 0.0356039268663925   |
| 0.98687763159556   |                     |   |                      |
| FEM1C              | 0.634434016242703   | 2 | 0.728172718585036    |
| 0.710051105275983  |                     |   |                      |
| AC010226.1         | 0.530273804842893   | 2 | 0.767100924812819    |
| 0.326478297615518  |                     |   |                      |
| TMED7              | 1.07842237651349    | 2 | 0.583208112386467    |
| 0.322255827677998  |                     |   |                      |
| ATG12              | 0.230338048897788   | 2 | 0.891215493967715    |
| 0.0605335578643699 |                     |   |                      |
| AP3S1              | 7.26650368504649    | 2 | 0.0264300979984641   |
| 0.219302955461502  |                     |   |                      |
| AC034236.2         | 0.865960770226545   | 2 | 0.648573213370324    |
| 0.831496025674901  |                     |   |                      |
| COMMD10            | 0.358183531879397   | 2 | 0.836029176873801    |
| 0.101831144844268  |                     |   |                      |
| DMXL1              | 0.928943508287864   | 2 | 0.628467002610009    |
| 0.271301572033753  |                     |   |                      |
| TNFAIP8            | 49.4637240255008    | 2 | 1.81589188130715e-11 |
| 0.718350248830523  |                     |   |                      |
| HSD17B4            | 4.51003500583732    | 2 | 0.104871708159245    |
| 0.548685099772308  |                     |   |                      |
| SRFBP1             | 0.047037626959795   | 2 | 0.976755598324169    |
| 0.0620803797218239 |                     |   |                      |
| SNX2               | 51.6456589694283    | 2 | 6.09945427498815e-12 |
| 0.649553410978651  |                     |   |                      |
| SNX24              | 6.34122528152814    | 2 | 0.0419778726681008   |

|                               |                      |                   |
|-------------------------------|----------------------|-------------------|
| 3.32531816656878              |                      |                   |
| CEP120 2.57302948895932 2     | 0.276231845908014    |                   |
| 0.877565143423286             |                      |                   |
| CSNK1G3 0.00591929585159706   | 2                    | 0.997044727514472 |
| 0.0208280995644723            |                      |                   |
| ZNF608 37.4731537270849 2     | 7.29135185562058e-09 |                   |
| 0.73639702208716              |                      |                   |
| GRAMD2B 0.0279310063255513    | 2                    | 0.986131562096084 |
| 0.147634782089052             |                      |                   |
| ALDH7A1 1.81591292822643 2    | 0.403347637781971    |                   |
| 0.845650493752706             |                      |                   |
| PHAX 22.7337630876526 2       | 1.15724701454933e-05 |                   |
| 0.62371991872849              |                      |                   |
| LMNB1 6.92663143748845 2      | 0.0313257223457808   |                   |
| 0.438005045495555             |                      |                   |
| MARCH3 0.352513195617193      | 2                    | 0.838402823406264 |
| 0.2150551060104               |                      |                   |
| C5orf63 3.07007138120306 2    | 0.215448001563745    |                   |
| 0.860641927380781             |                      |                   |
| AC011416.3 0.0563437212174405 | 2                    | 0.972221265904058 |
| 0.182125998983296             |                      |                   |
| PRRC1 0.490518860151098       | 2                    | 0.782501507481661 |
| 0.301432770486608             |                      |                   |
| LINC01184 3.43069536216551 2  | 0.179901161607777    |                   |
| 0.413345589294692             |                      |                   |
| SLC12A2 4.70910525165193 2    | 0.0949359689363133   |                   |
| 0.696881197671634             |                      |                   |
| ISOC1 3.92149738878974 2      | 0.140753000479602    |                   |
| 0.322935061956656             |                      |                   |
| HINT1 14.3577738742382 2      | 0.00076251609834721  |                   |
| 0.215434590169412             |                      |                   |
| LYRM7 1.02679825175826 2      | 0.598457883902741    |                   |
| 0.136875702043779             |                      |                   |
| CDC42SE2 1.10216679775237 2   | 0.576325082080382    |                   |
| 0.0633515893613701            |                      |                   |
| RAPGEF6 0.164196675863358     | 2                    | 0.921181367171781 |
| 0.19467517023642              |                      |                   |
| FNIP1 0.817250292496661       | 2                    | 0.664563299683491 |
| 0.153145595126885             |                      |                   |
| P4HA2 12.4823987041673 2      | 0.00194751836138085  |                   |
| 0.724920607874682             |                      |                   |
| AC116366.3 1.00278539931632 2 | 0.605686532614389    |                   |
| 0.579445941896671             |                      |                   |
| IRF1 10.893610660795 2        | 0.00431005191197398  |                   |
| 0.500739463840315             |                      |                   |
| RAD50 0.978289215894293       | 2                    | 0.613150654125297 |
| 0.551767558810563             |                      |                   |
| KIF3A 21.041380578815 2       | 2.69725658160747e-05 |                   |
| 1.17375111705139              |                      |                   |
| UQCRCQ 18.0676182134115 2     | 0.00011930717278863  |                   |

|                               |   |                                    |
|-------------------------------|---|------------------------------------|
| 0.161048242732516             |   |                                    |
| LEAP2 0.620494260454655       | 2 | 0.733265721706451                  |
| 0.306615654651494             |   |                                    |
| AFF4 3.98049840715052 2       |   | 0.136661364700987                  |
| 0.456206107605769             |   |                                    |
| ZCCHC10 23.6035538802748 2    |   | 7.49123460574985e-06               |
| 0.537512155019472             |   |                                    |
| HSPA4 4.81528467300687 2      |   | 0.0900272986326076                 |
| 0.13199122804377              |   |                                    |
| C5orf15 0.00419590140835972   | 2 | 0.99790424845622                   |
| 0.0101805855079509            |   |                                    |
| VDAC1 1.11588182985643 2      |   | 0.57238644365165 0.089686526459926 |
| TCF7 0.390510927921569        | 2 | 0.822624480302764                  |
| 0.25980293857786              |   |                                    |
| SKP1 13.1216962750717 2       |   | 0.00141468535363509                |
| 0.194945700062677             |   |                                    |
| PPP2CA 1.96869532090332 2     |   | 0.373682915588524                  |
| 0.112013572388886             |   |                                    |
| CDKL3 0.0352911410290975      | 2 | 0.982509200884581                  |
| 0.0260541378966589            |   |                                    |
| UBE2B 2.69770170453918 2      |   | 0.259538337237261                  |
| 0.185782860336133             |   |                                    |
| CDKN2AIPNL 4.32224144480329 2 |   | 0.115195945989648                  |
| 0.46581041071314              |   |                                    |
| JADE2 2.15405292307859 2      |   | 0.340606828830831                  |
| 0.255266778743611             |   |                                    |
| SAR1B 13.7069412993694 2      |   | 0.0010557850667543                 |
| 0.326664990409301             |   |                                    |
| SEC24A 1.1832056894694 2      |   | 0.553439495848809                  |
| 0.649493902295681             |   |                                    |
| CAMLG 22.6292745355769 2      |   | 1.2193137459704e-05                |
| 0.562522022883655             |   |                                    |
| DDX46 2.79666793033627 2      |   | 0.247008145499255                  |
| 0.117302792168716             |   |                                    |
| C5orf24 0.764290779280711     | 2 | 0.682395832708051                  |
| 0.200647387919204             |   |                                    |
| TXNDC15 0.0461075354439425    | 2 | 0.977209940008349                  |
| 0.0522357338671824            |   |                                    |
| PCBD2 0.0337533748248551      | 2 | 0.983264926101763                  |
| 0.062116441381146             |   |                                    |
| PITX1 0.79403621889258 2      |   | 0.672321850145977                  |
| 0.81353918721284              |   |                                    |
| H2AFY 11.929282753697 2       |   | 0.00256796537410708                |
| 0.308222954117244             |   |                                    |
| SMAD5 12.1101143607093 2      |   | 0.00234596797355602                |
| 0.730384822187709             |   |                                    |
| KLHL3 0.990499980944457       | 2 | 0.609418539423389                  |
| 0.676083940354913             |   |                                    |
| HNRNPA0 2.40805489795994 2    |   | 0.299983607051687                  |
| 0.0651461432968788            |   |                                    |



|                    |                    |   |                      |
|--------------------|--------------------|---|----------------------|
| AC106791.1         | 2.42478830158526   | 2 | 0.297484204122497    |
| 0.469647593655765  |                    |   |                      |
| FAM13B             | 1.62025796802586   | 2 | 0.444800690344741    |
| 0.202171222609107  |                    |   |                      |
| BRD8               | 0.105020614226786  | 2 | 0.948844541157122    |
| 0.104263728328317  |                    |   |                      |
| CDC23              | 0.239780567312519  | 2 | 0.887017751723089    |
| 0.141315848036891  |                    |   |                      |
| FAM53C             | 0.0456228198725395 | 2 | 0.977446803147228    |
| 0.0738330016329557 |                    |   |                      |
| KDM3B              | 2.36795814896132   | 2 | 0.306058482967967    |
| 0.447212455943886  |                    |   |                      |
| EGR1               | 21.5693133367667   | 2 | 2.07149132882556e-05 |
| 1.74050332919676   |                    |   |                      |
| ETF1               | 0.509584892304487  | 2 | 0.775077351554236    |
| 0.130723796381279  |                    |   |                      |
| HSPA9              | 4.7574692061035    | 2 | 0.0926677648573022   |
| 0.265084889502976  |                    |   |                      |
| CTNNA1             | 7.81077503546329   | 2 | 0.020133151026379    |
| 0.601230299004136  |                    |   |                      |
| SIL1               | 5.48770914082975   | 2 | 0.0643219350124681   |
| 0.41346438061923   |                    |   |                      |
| MATR3.1            | 0.0195212963381503 | 2 | 0.990286832351476    |
| 0.0964860432686356 |                    |   |                      |
| PAIP2              | 4.69305200426503   | 2 | 0.0957010506377587   |
| 0.115439454243785  |                    |   |                      |
| MZB1               | 70.9802843056648   | 2 | 3.33066907387547e-16 |
| 0.547342961221433  |                    |   |                      |
| SPATA24            | 8.4154142474116    | 2 | 0.0148804482797187   |
| 2.19300717996854   |                    |   |                      |
| DNAJC18            | 0.149079415290482  | 2 | 0.928170617857635    |
| 0.0461882142385323 |                    |   |                      |
| UBE2D2             | 1.01119489326823   | 2 | 0.603145120739274    |
| 0.035350999216369  |                    |   |                      |
| CXXC5              | 6.14426919389095   | 2 | 0.046322170085948    |
| 0.267079294283237  |                    |   |                      |
| PURA               | 2.30704992983336   | 2 | 0.315522600732021    |
| 0.414347019699139  |                    |   |                      |
| IGIP               | 3.64875919776922   | 2 | 0.161317694768571    |
| 1.93710973692353   |                    |   |                      |
| CYSTM1             | 0.543174172882402  | 2 | 0.762168906000175    |
| 0.144558515597442  |                    |   |                      |
| PFDN1              | 1.5771075083179    | 2 | 0.454501641295934    |
| 0.158712911750623  |                    |   |                      |
| HBEGF              | 6.71178737795766   | 2 | 0.0348781859719464   |
| 2.30468259703467   |                    |   |                      |
| ANKHD1             | 0.0631798278612423 | 2 | 0.968903834584902    |
| 0.0529744318218163 |                    |   |                      |
| SRA1               | 2.17126165085482   | 2 | 0.337688696074508    |
| 0.223006783243545  |                    |   |                      |

|          |                      |   |                     |
|----------|----------------------|---|---------------------|
| APBB3    | 0.000229429796274279 | 2 | 0.999885291681365   |
|          | 0.0109224169942244   |   |                     |
| SLC35A4  | 1.4255834160321      | 2 | 0.490273584479663   |
|          | 0.306758134223382    |   |                     |
| NDUFA2   | 5.59038673087433     | 2 | 0.0611030579706707  |
|          | 0.2261839656047      |   |                     |
| TMC06    | 1.1965942438033      | 2 | 0.54974699158141    |
| IK       | 0.0450214994842109   | 2 | 0.847678693071834   |
|          | 0.0206783257874218   |   | 0.977740726676186   |
| WDR55    | 5.54844511448019     | 2 | 0.0623979686863432  |
|          | 0.630898916521072    |   |                     |
| DND1     | 1.56675893086056     | 2 | 0.456859458769303   |
|          | 1.21602026215703     |   |                     |
| HARS     | 0.247222170061803    | 2 | 0.883723467342676   |
|          | 0.0721818076800433   |   |                     |
| HARS2    | 1.4946050051803      | 2 | 0.473642480425655   |
|          | 0.53426130162041     |   |                     |
| ZMAT2    | 0.00825376996659977  | 2 | 0.995881618904322   |
|          | 0.0118294784206673   |   |                     |
| TAF7     | 4.99942184755337     | 2 | 0.0821087308753412  |
|          | 0.18684460005141     |   |                     |
| PCDHGA10 | 0.925997017006355    | 2 | 0.629393571245975   |
|          | 0.944636649314045    |   |                     |
| DIAPH1   | 2.75114314382584     | 2 | 0.252695121086089   |
|          | 0.376695599767879    |   |                     |
| HDAC3    | 1.47535776729186     | 2 | 0.478222638673047   |
|          | 0.213705622897707    |   |                     |
| RELL2    | 1.02099642324364     | 2 | 0.600196479449626   |
|          | 0.307281163368972    |   |                     |
| FCHSD1   | 0.00669733167107163  | 2 | 0.996656934692727   |
|          | 0.0485422650776771   |   |                     |
| DELE1    | 1.25325850307502     | 2 | 0.534390063043127   |
|          | 0.327115055761989    |   |                     |
| RNF14    | 4.01241560635304     | 2 | 0.134497750743528   |
|          | 0.61831535633247     |   |                     |
| GNPDA1   | 0.871810679929302    | 2 | 0.646678937689342   |
|          | 0.752614861398627    |   |                     |
| NDFIP1   | 7.85347482235571     | 2 | 0.019707866441752   |
|          | 0.477975352697609    |   |                     |
| ARHGAP26 | 0.500973559781298    | 2 | 0.778421770766652   |
|          | 0.519545613600366    |   |                     |
| NR3C1    | 10.8330489012518     | 2 | 0.00444256018433031 |
|          | 0.403555076294013    |   |                     |
| YIPF5    | 0.0692778443679576   | 2 | 0.965954137906444   |
|          | 0.0587728949243252   |   |                     |
| LARS     | 3.83846881971137     | 2 | 0.146719245951854   |
|          | 0.255563780307619    |   |                     |
| RBM27    | 0.985107967588594    | 2 | 0.611063752631716   |
|          | 0.510106771061599    |   |                     |
| TCERG1   | 6.34574048132838     | 2 | 0.0418832103220156  |

|                             |   |                                    |
|-----------------------------|---|------------------------------------|
| 0.384519773690539           |   |                                    |
| JAKMIP2 6.53332988051035 2  |   | 0.0381333923809152                 |
| 3.06436167325907            |   |                                    |
| FBX038 0.334892950661215    | 2 | 0.845821888414215                  |
| 0.110459847940884           |   |                                    |
| GRPEL2 0.631173964242217    | 2 | 0.729360626946734                  |
| 0.797669073845524           |   |                                    |
| PCY0X1L 2.24671924399175 2  |   | 0.325185457157645                  |
| 0.907840391671255           |   |                                    |
| CSNK1A1 4.24221032871049 2  |   | 0.119899047109738                  |
| 0.172819236974164           |   |                                    |
| ARHGEF37 0.635350516935608  | 2 | 0.727839109628515                  |
| 0.580329763519859           |   |                                    |
| PDE6A 0.491796079404829     | 2 | 0.782001954012751                  |
| 0.584578781710338           |   |                                    |
| SLC26A2 1.02869223860158 2  |   | 0.597891416486338                  |
| 0.665997421694281           |   |                                    |
| TIGD6 4.15137184318316 2    |   | 0.125470335158289                  |
| 3.03890337853222            |   |                                    |
| HMGXB3 0.483373615497884    | 2 | 0.785302089570143                  |
| 0.193642523496617           |   |                                    |
| TCOF1 2.13285577588375 2    |   | 0.344235973279565                  |
| 0.219380885410188           |   |                                    |
| CD74 154.154516279597 2     | 0 | 0.552592865938353                  |
| RPS14 81.1634895352614 2    | 0 | 0.27103391221781                   |
| RBM22 3.42572322580194 2    |   | 0.18034896456522 0.257967475479043 |
| DCTN4 0.271702860698467     | 2 | 0.872972320047382                  |
| 0.307868352663138           |   |                                    |
| TNIP1 6.82941247221449 2    |   | 0.0328860660214361                 |
| 0.216636251516957           |   |                                    |
| ANXA6 97.7683421881875 2    | 0 | 0.872966498340973                  |
| CCDC69 11.6094561228985 2   |   | 0.0030132740670642                 |
| 0.272261526683575           |   |                                    |
| GM2A 2.42029434316837 2     |   | 0.298153396493114                  |
| 0.433147665641149           |   |                                    |
| ATOX1 0.421575300612867     | 2 | 0.809946040414854                  |
| 0.031768515724408           |   |                                    |
| G3BP1 4.02179559736691 2    |   | 0.133868433797214                  |
| 0.237412214997514           |   |                                    |
| FAM114A2 0.66017574041163 2 |   | 0.71886056423089 0.290485285097527 |
| MFAP3 0.240355803487807     | 2 | 0.886762666059016                  |
| 0.205760141175225           |   |                                    |
| GALNT10 5.59393293799875 2  |   | 0.0609948119150137                 |
| 2.41575185617764            |   |                                    |
| SAP30L 0.83259909747512 2   |   | 0.65948269368559 0.285442779898514 |
| LARP1 2.58394150638091 2    |   | 0.274728826522463                  |
| 0.347185706050254           |   |                                    |
| CNOT8 3.94939746398001 2    |   | 0.138803122885147                  |
| 0.435026544101102           |   |                                    |
| GEMIN5 1.16235867696137 2   |   | 0.559238446087731                  |

|                             |   |                      |
|-----------------------------|---|----------------------|
| 0.464433280178527           |   |                      |
| MRPL22 0.118986723829268    | 2 | 0.942241788251896    |
| 0.0415530206556432          |   |                      |
| MED7 1.01549750263019 2     |   | 0.601848966528921    |
| 0.132680621235343           |   |                      |
| CYFIP2 0.372995727223836    | 2 | 0.829860334853181    |
| 0.113767508140075           |   |                      |
| ADAM19 0.904457304954102    | 2 | 0.63620868240155     |
| 0.247617186282164           |   |                      |
| THG1L 0.507275708932792     | 2 | 0.775972766239933    |
| 0.128410085731266           |   |                      |
| CLINT1 17.0459090634439 2   |   | 0.000198851044877713 |
| 0.589593375645873           |   |                      |
| EBF1 7.19513066975919 2     |   | 0.027390327609026    |
| 0.427633033920696           |   |                      |
| RNF145 1.54877259056999 2   |   | 0.460986603857569    |
| 0.278125594871011           |   |                      |
| UBLCP1 0.858104409464723    | 2 | 0.651125936438504    |
| 0.179185390499858           |   |                      |
| TTC1 11.8234512491566 2     |   | 0.00270751070685926  |
| 0.229348988461402           |   |                      |
| PWWP2A 0.800104877526534    | 2 | 0.670284896203047    |
| 0.227802446488414           |   |                      |
| ZBED8 2.21804033097745 2    |   | 0.329882032571203    |
| 4.21241254217159            |   |                      |
| SLU7 5.56856924955076 2     |   | 0.0617732642909492   |
| 0.191055310605175           |   |                      |
| PTTG1 47.2915804431355 2    |   | 5.37977440373538e-11 |
| 0.347953849050421           |   |                      |
| MIR3142HG 2.1498799877177 2 | 2 | 0.341318235876747    |
| 0.508036175525419           |   |                      |
| CCNG1 4.31325835907101 2    |   | 0.115714517239763    |
| 0.19634420622091            |   |                      |
| NUDCD2 0.174846236208867    | 2 | 0.916289315002358    |
| 0.0576046804632444          |   |                      |
| HMMR 3.36694355508835 2     |   | 0.185728048960934    |
| 0.911203657843605           |   |                      |
| MAT2B 5.23704332379694 2    |   | 0.0729105696674004   |
| 0.339516935127118           |   |                      |
| RARS 3.23490598313306 2     |   | 0.198403391193845    |
| 0.318877973497764           |   |                      |
| PANK3 8.25455633963798 2    |   | 0.0161267133155264   |
| 1.25557637766309            |   |                      |
| SPDL1 1.07786719055004 2    |   | 0.583370029337817    |
| 0.482670749897323           |   |                      |
| DOCK2 0.0313696961790025    | 2 | 0.984437518537629    |
| 0.038437840344183           |   |                      |
| NPM1 7.61366761254758 2     |   | 0.0222184155148969   |
| 0.120802967335337           |   |                      |
| FBXW11 3.3029486960903 2    |   | 0.191766968840516    |

|                             |   |                                    |
|-----------------------------|---|------------------------------------|
| 0.349034617712735           |   |                                    |
| STK10 0.00108783207708288   | 2 | 0.999456231856972                  |
| 0.00964741601246487         |   |                                    |
| UBTD2 0.381364762834541     | 2 | 0.826395024888175                  |
| 0.366861982919435           |   |                                    |
| DUSP1 2.58638568309588 2    |   | 0.274393288692304                  |
| 0.367670331055842           |   |                                    |
| ERGIC1 2.87448289492275 2   |   | 0.23758223864596 0.318227591546081 |
| RPL26L1 0.506672420048966   | 2 | 0.776206869418132                  |
| 0.118775166923482           |   |                                    |
| ATP6V0E1 13.5391796978068 2 |   | 0.00114816547566909                |
| 0.164287507217619           |   |                                    |
| CREBRF 2.21005465849044 2   |   | 0.331201830622248                  |
| 0.363677629722925           |   |                                    |
| BNIP1 0.219065184696082     | 2 | 0.896252952897903                  |
| 0.109228482714323           |   |                                    |
| BOD1 2.43464478685487 2     |   | 0.296021736442327                  |
| 0.461994416341283           |   |                                    |
| CPEB4 35.4574868176472 2    |   | 1.99758177776843e-08               |
| 0.865512096529025           |   |                                    |
| SFXN1 0.049235789781375     | 2 | 0.975682654137679                  |
| 0.0442716313433116          |   |                                    |
| THOC3 4.07233506965235 2    |   | 0.130527997522685                  |
| 0.339225963442835           |   |                                    |
| SIMC1 1.72905040113856 2    |   | 0.421251515132098                  |
| 0.758490476561789           |   |                                    |
| KIAA1191 1.24178310353037 2 |   | 0.537465046014723                  |
| 0.329196617448681           |   |                                    |
| ARL10 1.45869465554644 2    |   | 0.482223621368249                  |
| 0.613259244243752           |   |                                    |
| NOP16 3.66662240092872 2    |   | 0.159883284716325                  |
| 0.383364969704467           |   |                                    |
| HIGD2A 12.6765016259382 2   |   | 0.00176739103207835                |
| 0.287979053370451           |   |                                    |
| CLTB 0.411043047510562      | 2 | 0.814222569251224                  |
| 0.0929406388822587          |   |                                    |
| FAF2 1.50727063603454 2     |   | 0.47065246761107 0.282388937816423 |
| RNF44 0.885353023157357     | 2 | 0.642314954934735                  |
| 0.1445049161245             |   |                                    |
| TSPAN17 7.1696278016349 2   |   | 0.0277418298816836                 |
| 0.677521065339555           |   |                                    |
| UIMC1 0.914458256334644     | 2 | 0.633035277231482                  |
| 0.174609558194065           |   |                                    |
| ZNF346 0.33661231421738 2   |   | 0.845095063213196                  |
| 0.178222957219335           |   |                                    |
| NSD1 5.21894126259667 2     |   | 0.0735734809541725                 |
| 0.324434820873598           |   |                                    |
| RAB24 1.49782929861131 2    |   | 0.472879514428323                  |
| 0.526510279495096           |   |                                    |
| MXD3 0.556300458637434      | 2 | 0.757183061874003                  |

|                               |   |                     |
|-------------------------------|---|---------------------|
| 0.462505503319944             |   |                     |
| PRELID1 3.97945218791245 2    |   | 0.136732872276932   |
| 0.125596092589141             |   |                     |
| LMAN2 8.44275386185129 2      |   | 0.0146784194141898  |
| 0.187530456029485             |   |                     |
| RGS14 3.12247373494437 2      |   | 0.209876321400717   |
| 0.620116315087662             |   |                     |
| GRK6 8.32943677115756 2       |   | 0.0155340889076416  |
| 0.461054803730502             |   |                     |
| PRR7-AS1 0.299086576421534    | 2 | 0.861101161684315   |
| 0.445137723779603             |   |                     |
| PRR7 0.0173738167883156       | 2 | 0.991350713775635   |
| 0.0565523456324425            |   |                     |
| DBN1 0.787830458008646        | 2 | 0.674411224328294   |
| 0.986264842729951             |   |                     |
| PDLIM7 6.02488231275311 2     |   | 0.0491714968156881  |
| 0.90228884152706              |   |                     |
| DOK3 13.3536174670591 2       |   | 0.00125979189604375 |
| 0.66831641055136              |   |                     |
| DDX41 8.75690158466175 2      |   | 0.012544778041182   |
| 0.681714235400352             |   |                     |
| FAM193B 2.57509696671183 2    |   | 0.275946441852089   |
| 0.925955941746711             |   |                     |
| TMED9 8.53576493044315 2      |   | 0.0140114214344006  |
| 0.171347687771138             |   |                     |
| B4GALT7 2.22346325600329 2    |   | 0.328988781362052   |
| 0.42374110245967              |   |                     |
| AC106795.2 1.56533724879942 2 |   | 0.457184328669549   |
| 1.16874521320741              |   |                     |
| N4BP3 7.26135714180975 2      |   | 0.0264981974010662  |
| 0.27443377650347              |   |                     |
| RMND5B 1.36948179534185 2     |   | 0.504220857449635   |
| 0.230182315446533             |   |                     |
| NHP2 0.74417106634528 2       |   | 0.689295282390346   |
| 0.0912500316381815            |   |                     |
| HNRNPAB 0.020623237287737     | 2 | 0.989741363827598   |
| 0.0207372721658451            |   |                     |
| PHYKPL 0.88018139521004 2     |   | 0.643978011171063   |
| 0.0634449236691597            |   |                     |
| COL23A1 0.462827269632373     | 2 | 0.793411215649684   |
| 0.445723067954415             |   |                     |
| CLK4 0.00297277179165319      | 2 | 0.99851471822857    |
| 0.0111685330678025            |   |                     |
| ZNF354A 0.0591808876536487    | 2 | 0.970843066908068   |
| 0.0752224829182322            |   |                     |
| ZNF354B 0.038307461751136     | 2 | 0.98102853627396    |
| 0.147735871255799             |   |                     |
| ZNF879 1.09235770279886 2     |   | 0.579158638784178   |
| 0.542353875192981             |   |                     |
| RUFY1 3.06767743517109 2      |   | 0.215706041410523   |

|                               |   |                                    |
|-------------------------------|---|------------------------------------|
| 0.195870620437495             |   |                                    |
| HNRNPH1 0.699545017787383     | 2 | 0.704848418227809                  |
| 0.0634139858449595            |   |                                    |
| CANX 0.254998212392993        | 2 | 0.880294202643912                  |
| 0.0859961168814977            |   |                                    |
| MAML1 0.0186552612983424      | 2 | 0.990715736754473                  |
| 0.0802404296747503            |   |                                    |
| MGAT4B 3.75854424055366 2     |   | 0.152701213432427                  |
| 0.534426087715574             |   |                                    |
| SQSTM1 12.6940123986074 2     |   | 0.0017519843847813                 |
| 0.286616236867753             |   |                                    |
| MRNIP 3.12406526584856 2      |   | 0.20970937550863 0.599848996694637 |
| TBC1D9B 1.38907433015923 2    |   | 0.499305490530689                  |
| 0.533722982398515             |   |                                    |
| MAPK9 0.00112120850080391     | 2 | 0.999439552858801                  |
| 0.0110455787216994            |   |                                    |
| CNOT6 0.175489503921426       | 2 | 0.915994652725729                  |
| 0.252883291684972             |   |                                    |
| MGAT1 8.62734325667287 2      |   | 0.0133843170300432                 |
| 0.558361842286491             |   |                                    |
| LINC00847 1.81757086578897 2  |   | 0.403013413732041                  |
| 0.503520445805655             |   |                                    |
| ZFP62 3.53990803615902 2      |   | 0.170340821243432                  |
| 0.655512012857864             |   |                                    |
| BTNL9 50.1677825744539 2      |   | 1.27704513630533e-11               |
| 1.77820984647185              |   |                                    |
| AC008443.5 1.0630738963071 2  |   | 0.587701009205173                  |
| 0.667655346537499             |   |                                    |
| TRIM41 0.618467789830376      | 2 | 0.734009068958112                  |
| 0.295694202897246             |   |                                    |
| RACK1 59.7126292024342 2      |   | 1.08024700296028e-13               |
| 0.183114355086419             |   |                                    |
| TRIM52 0.165002142185437      | 2 | 0.920810451582906                  |
| 0.139861048580123             |   |                                    |
| DUSP22 46.5903463320324 2     |   | 7.63896723654511e-11               |
| 0.685925520897026             |   |                                    |
| IRF4 8.05025858814995 2       |   | 0.0178611146677168                 |
| 1.77393552796674              |   |                                    |
| EXOC2 2.23616369048483 2      |   | 0.326906250390878                  |
| 0.543494144154025             |   |                                    |
| GMDS 83.394327908539 2        | 0 | 1.65914453502244                   |
| GMDS-DT 5.41732198755957 2    |   | 0.0666259595878868                 |
| 2.0559660156686               |   |                                    |
| WRNIP1 6.70791964822806 2     |   | 0.0349457009317085                 |
| 0.966332190039339             |   |                                    |
| SERPINB1 1.16093809129959 2   |   | 0.559635810252499                  |
| 0.126013434282497             |   |                                    |
| SERPINB9P1 1.38538363778712 2 |   | 0.500227732679624                  |
| 1.15958367930579              |   |                                    |
| SERPINB9 46.1751141832496 2   |   | 9.40159061713075e-11               |

|                            |   |                                    |
|----------------------------|---|------------------------------------|
| 0.880382391990481          |   |                                    |
| SERPINB6 0.499993566667681 | 2 | 0.778803288217558                  |
| 0.543882791599723          |   |                                    |
| NQ02 1.45300705826967 2    |   | 0.48359692001299 0.583194420203086 |
| RIPK1 2.2840311775111 2    |   | 0.319175047403929                  |
| 0.759376386329947          |   |                                    |
| BPHL 10.3618353859419 2    |   | 0.00562284400159452                |
| 1.58440311276092           |   |                                    |
| TUBB2A 6.66256056366131 2  |   | 0.0357473091276849                 |
| 0.429237132773276          |   |                                    |
| TUBB2B 4.17213254689092 2  |   | 0.124174645424166                  |
| 0.448899832030491          |   |                                    |
| PSMG4 4.96081845221824 2   |   | 0.0837089626889372                 |
| 0.700320074635347          |   |                                    |
| PXDC1 1.67941419167463 2   |   | 0.431836991759113                  |
| 1.66587401206745           |   |                                    |
| FAM50B 1.52087079897391 2  |   | 0.467462849609487                  |
| 0.186362721195934          |   |                                    |
| PRPF4B 3.02590265910766 2  |   | 0.220258960968082                  |
| 0.239750757825199          |   |                                    |
| ECI2 5.26516970124128 2    |   | 0.0718923907679939                 |
| 0.466850299547669          |   |                                    |
| CDYL 0.27431804830794 2    |   | 0.871831572829516                  |
| 0.255546670486314          |   |                                    |
| RPP40 0.576145170363222    | 2 | 0.749707172632756                  |
| 0.330185358986612          |   |                                    |
| LYRM4 4.72912653668746 2   |   | 0.0939903399630273                 |
| 0.357991874290611          |   |                                    |
| FARS2 3.01019783381294 2   |   | 0.221995333654195                  |
| 0.467131245330541          |   |                                    |
| LY86-AS1 0.129988908708753 | 2 | 0.93707266003589                   |
| 0.202615663454418          |   |                                    |
| LY86 17.999868439145 2     |   | 0.000123417922303304               |
| 0.297655064953318          |   |                                    |
| RREB1 1.90027991969849 2   |   | 0.386686899026873                  |
| 0.539240717937231          |   |                                    |
| SSR1 0.55082841555587 2    |   | 0.759257567693797                  |
| 0.123577235204834          |   |                                    |
| RIOK1 1.67016143592198 2   |   | 0.433839461382917                  |
| 0.303942833306765          |   |                                    |
| SNRNP48 0.285355540980139  | 2 | 0.867033407637515                  |
| 0.134353804254857          |   |                                    |
| TXNDC5 1.14168916155253 2  |   | 0.565048008428118                  |
| 0.859786649206032          |   |                                    |
| BLOC1S5 5.07406134809825 2 |   | 0.0791009278610508                 |
| 0.674487824751105          |   |                                    |
| EEF1E1 2.68075536924618 2  |   | 0.261746792170906                  |
| 0.250554822226929          |   |                                    |
| SLC35B3 0.0304899491323656 | 2 | 0.984870641790137                  |
| 0.0490414050344365         |   |                                    |



|            |                      |   |                      |
|------------|----------------------|---|----------------------|
| GCNT2      | 4.75098676558913     | 2 | 0.0929686087812797   |
|            | 0.416864154929506    |   |                      |
| C6orf52    | 2.26990351310493     | 2 | 0.321437628219688    |
|            | 0.538032647787914    |   |                      |
| PAK1IP1    | 1.00792022084212     | 2 | 0.604133481005409    |
|            | 0.334732339867821    |   |                      |
| TMEM14C    | 0.000943404555508775 | 2 | 0.999528408956275    |
|            | 0.00629584349465036  |   |                      |
| TMEM14B    | 0.0430365987824779   | 2 | 0.978711567479394    |
|            | 0.027927839910267    |   |                      |
| SMIM13     | 9.35910416105724     | 2 | 0.00928317106903187  |
|            | 1.58324347297775     |   |                      |
| NEDD9      | 4.98824529356066     | 2 | 0.0825688616790394   |
|            | 0.792543557334316    |   |                      |
| HIVEP1     | 0.57575354042227     | 2 | 0.749853990894769    |
|            | 0.497204113616555    |   |                      |
| PHACTR1    | 75.1391870445864     | 2 | 0                    |
|            | 0.0184456592034203   |   | 1.07589156442295     |
| TBC1D7     | 0.0414740490316138   | 2 | 0.990819570242255    |
|            | 0.0414740490316138   |   |                      |
| GFOD1      | 9.4090781477158      | 2 | 0.00905408652143758  |
|            | 0.74358438259323     |   |                      |
| SIRT5      | 0.0581900031232694   | 2 | 0.971324182769005    |
|            | 0.0923793237079188   |   |                      |
| NOL7       | 0.248780519371094    | 2 | 0.883035160605612    |
|            | 0.0452721103381681   |   |                      |
| RANBP9     | 3.61883520673715     | 2 | 0.163749476180668    |
|            | 0.840906538897247    |   |                      |
| MCUR1      | 0.0475076883398845   | 2 | 0.976526057757485    |
|            | 0.0454313081854104   |   |                      |
| CD83       | 47.1978612201617     | 2 | 5.63786795026999e-11 |
|            | 0.831716281675294    |   |                      |
| JARID2     | 0.851176858963303    | 2 | 0.653385200875517    |
|            | 0.397930767831677    |   |                      |
| DTNBP1     | 13.1625809030679     | 2 | 0.00138605949765613  |
|            | 0.242436827636391    |   |                      |
| MYLIP      | 1.02009378011789     | 2 | 0.600467422199317    |
|            | 0.66807280848685     |   |                      |
| FAM8A1     | 0.389686752600675    | 2 | 0.822963543557372    |
|            | 0.584979381839843    |   |                      |
| NUP153     | 0.655929298336206    | 2 | 0.720388485587433    |
|            | 0.261546805524293    |   |                      |
| AL138724.1 | 2.93799429267987     | 2 | 0.230156182459553    |
|            | 0.624103445072857    |   |                      |
| KIF13A     | 0.176512285448272    | 2 | 0.915526341276261    |
|            | 0.26723527929839     |   |                      |
| TPMT       | 1.72474219305271     | 2 | 0.422159912764179    |
|            | 0.475704593165787    |   |                      |
| KDM1B      | 2.8091991973689      | 2 | 0.24546532141652     |
|            | 0.634868129212578    |   | 0.608604916481396    |
| DEK        | 48.2735417953949     | 2 | 3.29255511744009e-11 |
|            | 0.634868129212578    |   |                      |

|            |                     |   |                      |
|------------|---------------------|---|----------------------|
| RNF144B    | 7.59728405937803    | 2 | 0.0224011713363043   |
|            | 0.696638587905244   |   |                      |
| E2F3       | 0.00286622338625171 | 2 | 0.998567914721056    |
|            | 0.0273421157054174  |   |                      |
| CDKAL1     | 1.18967343516142    | 2 | 0.551652633691021    |
|            | 0.210288023550111   |   |                      |
| SOX4       | 18.4099807860011    | 2 | 0.000100536431566822 |
|            | 0.738390399767609   |   |                      |
| MRS2       | 2.15650627369307    | 2 | 0.340189271000727    |
|            | 0.337209629803176   |   |                      |
| GPLD1      | 0.011978358031755   | 2 | 0.994028720364739    |
|            | 0.0704762830790057  |   |                      |
| ALDH5A1    | 3.04574370379811    | 2 | 0.218084679858342    |
|            | 0.336196077373919   |   |                      |
| TDP2       | 0.150484079401717   | 2 | 0.927518962745555    |
|            | 0.0603288691304494  |   |                      |
| ACOT13     | 1.71426962908861    | 2 | 0.42437625875111     |
|            |                     |   | 0.224862286805917    |
| C6orf62    | 1.67107344568161    | 2 | 0.433641673571       |
|            |                     |   | 0.212332614406866    |
| GMNN       | 0.254735609174636   | 2 | 0.880409794277787    |
|            | 0.0826808527857537  |   |                      |
| RIPOR2     | 9.7503128938836     | 2 | 0.00763389982515106  |
|            | 0.264355604534801   |   |                      |
| TRIM38     | 13.7832779187362    | 2 | 0.00101624688797708  |
|            | 0.666472552321123   |   |                      |
| HIST1H1C   | 24.9036674580536    | 2 | 3.91054530679558e-06 |
|            | 0.571692117044477   |   |                      |
| HIST1H4C   | 1.67346136832303    | 2 | 0.433124231150298    |
|            | 0.121858078461691   |   |                      |
| HIST1H2BC  | 19.8736510596877    | 2 | 4.83605804383336e-05 |
|            | 0.985738947714102   |   |                      |
| HIST1H2AC  | 59.8186207056229    | 2 | 1.02473585172902e-13 |
|            | 1.17047906331066    |   |                      |
| HIST1H1E   | 5.71606325945416    | 2 | 0.0573815974069463   |
|            | 1.06484452013607    |   |                      |
| HIST1H2BD  | 34.8859470499808    | 2 | 2.65835422563754e-08 |
|            | 1.43173030424276    |   |                      |
| HIST1H2BE  | 0.011266311248039   | 2 | 0.994382680846734    |
|            | 0.107768252692721   |   |                      |
| AL031777.3 | 10.8661801238592    | 2 | 0.00436957266961502  |
|            | 2.34076420411851    |   |                      |
| HIST1H2BG  | 10.4953585457772    | 2 | 0.00525971059931063  |
|            | 2.29070424791916    |   |                      |
| HIST1H2AE  | 7.10548791256371    | 2 | 0.0286459285381334   |
|            | 0.818144440864026   |   |                      |
| HIST1H1D   | 0.203318639308407   | 2 | 0.903337248498959    |
|            | 0.269879406457708   |   |                      |
| HIST1H2BH  | 1.50181723993035    | 2 | 0.471937545991877    |
|            | 1.09646141956512    |   |                      |
| HIST1H4H   | 13.8220010875804    | 2 | 0.000996759995371965 |
|            | 1.35873300794915    |   |                      |

|             |                    |   |                      |
|-------------|--------------------|---|----------------------|
| BTN3A2      | 24.4103995220274   | 2 | 5.00436632799861e-06 |
|             | 0.899309944413335  |   |                      |
| BTN2A2      | 9.83256698093449   | 2 | 0.00732630860808337  |
|             | 1.15999167129044   |   |                      |
| BTN3A1      | 3.09470217319026   | 2 | 0.212810945632365    |
|             | 1.2265166075053    |   |                      |
| BTN3A3      | 1.91012484710522   | 2 | 0.384788123961561    |
|             | 0.730598353158637  |   |                      |
| BTN2A1      | 0.947014571554506  | 2 | 0.622814046319406    |
|             | 0.290352894159692  |   |                      |
| HCG11       | 2.42438159270633   | 2 | 0.297544705007429    |
|             | 0.94125940372346   |   |                      |
| HMGNA       | 0.152327754006945  | 2 | 0.926664335141138    |
|             | 0.277890331248896  |   |                      |
| ABT1        | 6.41088591981209   | 2 | 0.0405409396491273   |
|             | 0.190731192260139  |   |                      |
| ZNF322      | 1.70838041899091   | 2 | 0.425627720851796    |
|             | 0.388322581110827  |   |                      |
| HIST1H2BJ   | 0.738519661383624  | 2 | 0.691245780245306    |
|             | 0.579036317223122  |   |                      |
| ZNF184      | 0.842996594314143  | 2 | 0.656063105565025    |
|             | 0.500183271319858  |   |                      |
| HIST1H3H    | 3.0880403052311    | 2 | 0.213520986735918    |
|             | 0.72366954730687   |   |                      |
| HIST1H4J    | 3.10312371280704   | 2 | 0.211916731713331    |
|             | 1.12316799058052   |   |                      |
| HIST1H2BN   | 0.0947721837351424 | 2 | 0.953719103307498    |
|             | 0.27945770894663   |   |                      |
| AL121944.1  | 5.83464601556075   | 2 | 0.0540782607863455   |
|             | 0.894045233412665  |   |                      |
| ZNF165      | 2.55539579536582   | 2 | 0.278678108086168    |
|             | 1.23456357761711   |   |                      |
| ZSCAN16-AS1 | 5.5129531871945    | 2 | 0.0635151643077669   |
|             | 0.627736173979857  |   |                      |
| ZSCAN16     | 0.653482526105922  | 2 | 0.721270338171325    |
|             | 0.17811579227347   |   |                      |
| ZKSCAN4     | 0.938643839413222  | 2 | 0.625426213722427    |
|             | 0.449539931888973  |   |                      |
| NKAPL       | 2.08572902021171   | 2 | 0.352443656188439    |
|             | 1.62257947670418   |   |                      |
| ZSCAN26     | 0.962564982212661  | 2 | 0.617990316274266    |
|             | 0.452595947552086  |   |                      |
| PGBD1       | 10.3002513824578   | 2 | 0.00579867583834348  |
|             | 1.51872992689615   |   |                      |
| ZKSCAN3     | 2.78493605712647   | 2 | 0.248461337621148    |
|             | 1.27561685640665   |   |                      |
| ZSCAN12     | 1.9657382974875    | 2 | 0.374235818790476    |
|             | 1.28105438885772   |   |                      |
| TRIM27      | 4.023324728525     | 2 | 0.133766121717743    |
|             | 0.272756552644051  |   |                      |

|          |                    |   |                      |
|----------|--------------------|---|----------------------|
| HLA-F    | 26.2210335888634   | 2 | 2.02383406333606e-06 |
|          | 1.14264417013599   |   |                      |
| HLA-A    | 74.3075175861974   | 2 | 1.11022302462516e-16 |
|          | 0.677590496305534  |   |                      |
| ZNRD1    | 0.0810293140491015 | 2 | 0.960295089339563    |
|          | 0.0464762481751576 |   |                      |
| PPP1R11  | 4.78396705226504   | 2 | 0.0914481141387106   |
|          | 0.275692983693317  |   |                      |
| TRIM26   | 16.040100578433    | 2 | 0.000328803487128493 |
|          | 0.945857933509467  |   |                      |
| HCG18    | 0.939649869968925  | 2 | 0.625111693892527    |
|          | 0.40668912934364   |   |                      |
| TRIM39   | 0.209810604986818  | 2 | 0.900409785110688    |
|          | 0.22613660841938   |   |                      |
| RPP21    | 6.7397914090869    | 2 | 0.0343932242134439   |
|          | 1.14083827987078   |   |                      |
| HLA-E    | 110.867521077523   | 2 | 0.743934732979416    |
| GNL1     | 0.478202313339336  | 2 | 0.787335234134083    |
|          | 0.113135470377326  |   |                      |
| PRR3     | 2.1069872098716    | 2 | 0.348717337922203    |
|          | 0.591180556478298  |   |                      |
| ABCF1    | 0.264354305790763  | 2 | 0.876185762485111    |
|          | 0.076528241556318  |   |                      |
| PPP1R10  | 1.4074039517003    | 2 | 0.494750355551874    |
|          | 0.19716185109387   |   |                      |
| MRPS18B  | 0.120105214216063  | 2 | 0.941714991378838    |
|          | 0.0421859305389199 |   |                      |
| ATAT1    | 0.493302309022132  | 2 | 0.781413238473811    |
|          | 0.336721839404789  |   |                      |
| C6orf136 | 3.00231183090452   | 2 | 0.222872389557655    |
|          | 0.642414623365596  |   |                      |
| DHX16    | 1.51903166025403   | 2 | 0.467892911828613    |
|          | 0.337308469896144  |   |                      |
| PPP1R18  | 4.05845638582666   | 2 | 0.13143692596189     |
| NRM      | 0.037120064332236  | 2 | 0.199182300670073    |
|          | 0.0873485304931426 |   | 0.981611144579666    |
| MDC1     | 1.2710485288965    | 2 | 0.529657734795687    |
|          | 0.494257187973658  |   |                      |
| TUBB     | 6.26547575101637   | 2 | 0.0435982670704262   |
|          | 0.239716992076706  |   |                      |
| FLOT1    | 1.96770981531842   | 2 | 0.373867094262223    |
|          | 0.136999988398449  |   |                      |
| IER3-AS1 | 2.56649679286636   | 2 | 0.277135590426838    |
|          | 2.7695059927299    |   |                      |
| VARS2    | 2.98543286321493   | 2 | 0.224761276894558    |
|          | 1.00725203927162   |   |                      |
| CCHCR1   | 0.403102243992582  | 2 | 0.817461786213477    |
|          | 0.36779421743186   |   |                      |
| TCF19    | 3.15641980467914   | 2 | 0.206344143961711    |
|          | 7.77261497122652   |   |                      |

|                    |                    |   |                      |
|--------------------|--------------------|---|----------------------|
| AL662844.4         | 2.62166671206047   | 2 | 0.269595293880222    |
| 0.567555534774255  |                    |   |                      |
| HLA-C              | 36.2310597229114   | 2 | 1.35682970414663e-08 |
| 0.298108952180079  |                    |   |                      |
| HLA-B              | 164.350094470606   | 2 | 0                    |
| MICA               | 0.909453683785261  | 2 | 0.466387242518364    |
| 0.495439929414246  |                    |   | 0.634621296226312    |
| MICB               | 0.953766008911515  | 2 | 0.620715145951762    |
| 0.590632214661252  |                    |   |                      |
| DDX39B             | 0.0391764640523375 | 2 | 0.980602370837568    |
| 0.0643059539752866 |                    |   |                      |
| NFKBIL1            | 2.39461306420408   | 2 | 0.302006562381877    |
| 0.263033267856149  |                    |   |                      |
| LTA                | 5.40785355404035   | 2 | 0.0669421291394675   |
| 1.32808514081397   |                    |   |                      |
| TNF                | 5.33705444686828   | 2 | 0.0693542935072908   |
| 9.21449787604274   |                    |   |                      |
| LTB                | 853.133167161002   | 2 | 0                    |
| LST1               | 6.60981737766463   | 2 | 1.76973834248432     |
| 0.891722377181831  |                    |   | 0.0367025630372713   |
| NCR3               | 7.54315509410895   | 2 | 0.0230157262419225   |
| 1.54784110747073   |                    |   |                      |
| AIF1               | 1.60774734804809   | 2 | 0.44759177700123     |
| PRRC2A             | 0.391952799825996  | 2 | 0.434817483470344    |
| 0.182679425455049  |                    |   | 0.822031634467359    |
| BAG6               | 3.33264832383577   | 2 | 0.188940304708179    |
| 0.243167622350381  |                    |   |                      |
| APOM               | 1.42970507785775   | 2 | 0.48926425390807     |
| C6orf47            | 6.18694266087353   | 2 | 0.408118862286823    |
| 0.980792092051686  |                    |   | 0.0453442759207617   |
| GPANK1             | 2.47316509849211   | 2 | 0.290374866034221    |
| 0.310736168465543  |                    |   |                      |
| CSNK2B             | 0.0177263762593513 | 2 | 0.991175974135987    |
| 0.0116282106657952 |                    |   |                      |
| ABHD16A            | 3.99850799501556   | 2 | 0.135436281362936    |
| 2.74253827075802   |                    |   |                      |
| DDAH2              | 6.67732896453466   | 2 | 0.035484316023915    |
| 0.936108231605822  |                    |   |                      |
| CLIC1              | 4.98203579644364   | 2 | 0.0828256156052591   |
| 0.169249727864329  |                    |   |                      |
| VAR5               | 0.58977848605051   | 2 | 0.744614054098932    |
| 0.259981523827292  |                    |   |                      |
| LSM2               | 1.32032900475051   | 2 | 0.516766318212404    |
| 0.150270769418521  |                    |   |                      |
| HSPA1A             | 0.741374418711151  | 2 | 0.690259814607725    |
| 0.484703793025208  |                    |   |                      |
| HSPA1B             | 0.0519774493904347 | 2 | 0.97434607559578     |
| 0.142491448389239  |                    |   |                      |
| C6orf48            | 13.4306300869413   | 2 | 0.00121220405478728  |
| 0.221188320070199  |                    |   |                      |

|            |                     |   |                      |
|------------|---------------------|---|----------------------|
| NEU1       | 7.10880064077514    | 2 | 0.0285985197242958   |
|            | 0.766718252743552   |   |                      |
| EHMT2      | 0.246830247428901   | 2 | 0.883896659925684    |
|            | 0.133711737708293   |   |                      |
| NELFE      | 0.170130628523281   | 2 | 0.918452294408916    |
|            | 0.0637131371203452  |   |                      |
| SKIV2L     | 2.11357978180556    | 2 | 0.347569758269205    |
|            | 0.516329070098157   |   |                      |
| DX0        | 3.71515456794587    | 2 | 0.156050238178113    |
|            | 0.537078628125905   |   |                      |
| STK19      | 0.00645817606280535 | 2 | 0.99677611986626     |
|            | 0.0268696899238134  |   |                      |
| ATF6B      | 2.02557072380748    | 2 | 0.363205909439651    |
|            | 0.192522399232118   |   |                      |
| FKBPL      | 0.306699400311775   | 2 | 0.857829686178216    |
|            | 0.329780350855941   |   |                      |
| AGPAT1     | 0.428298397178703   | 2 | 0.80722793876795     |
|            | 0.261624155474686   |   |                      |
| RNF5       | 0.116426980615764   | 2 | 0.943448508822348    |
|            | 0.0510925750325238  |   |                      |
| AGER       | 1.2647325992658     | 2 | 0.531333019138591    |
|            | 1.05441003518122    |   |                      |
| PBX2       | 1.88048212538371    | 2 | 0.390533680910034    |
|            | 0.436109127623186   |   |                      |
| GPSM3      | 10.3444240324071    | 2 | 0.00567200835797477  |
|            | 0.242358563492394   |   |                      |
| NOTCH4     | 2.46192349736532    | 2 | 0.292011600815547    |
|            | 0.919292601107013   |   |                      |
| AL662796.1 | 3.95158015037102    | 2 | 0.13865172367075     |
|            | 0.809565235296418   |   |                      |
| HLA-DRA    | 119.118557553461    | 2 | 0.554372495430469    |
| HLA-DRB5   | 40.5845882587398    | 2 | 1.53875201469589e-09 |
|            | 0.786048740358064   |   |                      |
| HLA-DRB1   | 74.8068715383073    | 2 | 1.11022302462516e-16 |
|            | 0.806956116289738   |   |                      |
| HLA-DQA1   | 114.660405898259    | 2 | 0.883774112268367    |
| HLA-DQB1   | 162.108188579244    | 2 | 0.108497396833966    |
| HLA-DQA2   | 4.03127271764629    | 2 | 0.133235590739456    |
|            | 1.21457132391104    |   |                      |
| HLA-DOB    | 7.08400798651735    | 2 | 0.0289552427900165   |
|            | 0.272047777397632   |   |                      |
| TAP2       | 0.840684728265304   | 2 | 0.656821909053365    |
|            | 0.191578913041551   |   |                      |
| PSMB8      | 0.491086713954974   | 2 | 0.782279365790373    |
|            | 0.0400848972571061  |   |                      |
| PSMB8-AS1  | 0.00964108648633502 | 2 | 0.995191056928217    |
|            | 0.0148409851767049  |   |                      |
| PSMB9      | 11.093352448561     | 2 | 0.00390039977659606  |
|            | 0.267173742886096   |   |                      |
| TAP1       | 6.88727917349272    | 2 | 0.0319481952405956   |

|                             |                      |                   |
|-----------------------------|----------------------|-------------------|
| 0.416725237314187           |                      |                   |
| HLA-DMB 24.797445675604 2   | 4.123852173743e-06   |                   |
| 0.304891829131264           |                      |                   |
| HLA-DMA 21.7305867969739 2  | 1.91101032176455e-05 |                   |
| 0.248812268082112           |                      |                   |
| BRD2 0.167490233317802      | 2                    | 0.919665633673791 |
| 0.0574852757766966          |                      |                   |
| HLA-D0A 5.15942207554093 2  | 0.0757959030118266   |                   |
| 0.566937917947855           |                      |                   |
| HLA-DPA1 156.731589895465 2 | 0                    | 0.855614127143738 |
| HLA-DPB1 127.933002533932 2 | 0                    | 0.828322640639359 |
| RXR8 0.189510748676471      | 2                    | 0.909595417635553 |
| 0.104730672175871           |                      |                   |
| SLC39A7 1.04796483852153 2  | 0.59215762608478     | 0.186395679078084 |
| HSD17B8 0.0115751810304855  | 2                    | 0.994229125323054 |
| 0.0657353916988235          |                      |                   |
| RING1 0.417192598551444     | 2                    | 0.81172286261489  |
| 0.131884474747692           |                      |                   |
| VPS52 1.17938479860277 2    | 0.554497822421964    |                   |
| 0.563110707114493           |                      |                   |
| RPS18 53.8282972208216 2    | 2.04802841352603e-12 |                   |
| 0.202033382500593           |                      |                   |
| B3GALT4 1.37898590146298 2  | 0.501830457333219    |                   |
| 0.397090125703711           |                      |                   |
| WDR46 0.296955076099688     | 2                    | 0.862019369589152 |
| 0.0805386876373291          |                      |                   |
| PFDN6 2.83780612297151 2    | 0.2419793077889      | 0.197269363479864 |
| RGL2 0.0611580087044046     | 2                    | 0.969883803998629 |
| 0.0794596643534984          |                      |                   |
| TAPBP 2.55918925980898 2    | 0.278150031307549    |                   |
| 0.191903551416164           |                      |                   |
| ZBTB22 0.000274163741835465 | 2                    | 0.999862927524373 |
| 0.00733740454904272         |                      |                   |
| DAXX 1.33371764102963 2     | 0.513318473435335    |                   |
| 0.0817711554380136          |                      |                   |
| KIFC1 1.15815808464457 2    | 0.56041424678029     | 0.893042236246437 |
| PHF1 0.000320682612724892   | 2                    | 0.999839671547618 |
| 0.00536702662994465         |                      |                   |
| CUTA 3.34143022538911 2     | 0.188112495894397    |                   |
| 0.0950718158964513          |                      |                   |
| SYNGAP1 0.00174852319030056 | 2                    | 0.999126120460171 |
| 0.0315349306685327          |                      |                   |
| BAK1 0.412716528443029      | 2                    | 0.813541561232228 |
| 0.135936991405252           |                      |                   |
| ITPR3 1.59144624728419 2    | 0.451254803894514    |                   |
| 0.73985205564344            |                      |                   |
| UQCC2 1.20040632462722 2    | 0.548700149577615    |                   |
| 0.167565298277554           |                      |                   |
| LEMD2 0.000165047732465794  | 2                    | 0.999917479538768 |
| 0.00318866183477672         |                      |                   |

|            |                    |   |                      |
|------------|--------------------|---|----------------------|
| HMGA1      | 27.0065232510522   | 2 | 1.36649481563555e-06 |
|            | 0.289825556722775  |   |                      |
| SMIM29     | 3.2486991779667    | 2 | 0.197039790386301    |
|            | 0.381530480492865  |   |                      |
| NUDT3      | 1.24043302952538   | 2 | 0.537827977290572    |
|            | 0.37055169877518   |   |                      |
| RPS10      | 27.784444966145    | 2 | 9.26156617619966e-07 |
|            | 0.237910354283332  |   |                      |
| PACSIN1    | 0.0621120056425676 | 2 | 0.96942128122903     |
|            | 0.211971142746408  |   |                      |
| C6orf106   | 4.21841289729486   | 2 | 0.12133421316894     |
| AL451165.2 | 2.7310612458344    | 2 | 0.494254599293445    |
|            | 0.662771475344247  |   | 0.255245201095009    |
| SNRPC      | 1.14399248669001   | 2 | 0.564397638362584    |
|            | 0.0524643574601179 |   |                      |
| UHRF1BP1   | 0.300641672959739  | 2 | 0.860431874201907    |
|            | 0.478791338134623  |   |                      |
| TAF11      | 4.99195010854429   | 2 | 0.0824160520775961   |
|            | 0.222712609907519  |   |                      |
| ANKS1A     | 1.62840386353724   | 2 | 0.442992724745334    |
|            | 0.490363637869477  |   |                      |
| ZNF76      | 0.0386971934613949 | 2 | 0.980837385934275    |
|            | 0.056343390995377  |   |                      |
| DEF6       | 0.626081167730063  | 2 | 0.731220236223321    |
|            | 0.179460889505767  |   |                      |
| PPARD      | 0.841871753382612  | 2 | 0.656432192663768    |
|            | 0.639591014572917  |   |                      |
| FANCE      | 0.344345327127143  | 2 | 0.841833806594124    |
|            | 0.380396844279576  |   |                      |
| RPL10A     | 18.1765374071669   | 2 | 0.00011298350723421  |
|            | 0.112565189414488  |   |                      |
| FKBP5      | 8.95056834549256   | 2 | 0.0113869857936718   |
|            | 0.848966274894436  |   |                      |
| SRPK1      | 0.0524965776583705 | 2 | 0.974093203120215    |
|            | 0.0454339296319167 |   |                      |
| MAPK14     | 2.04631686332101   | 2 | 0.359457822397104    |
|            | 0.479015035667827  |   |                      |
| MAPK13     | 0.676920824204293  | 2 | 0.712866999736261    |
|            | 0.202148260847633  |   |                      |
| ETV7       | 2.05951289621877   | 2 | 0.357093920878601    |
|            | 0.359806823089466  |   |                      |
| Z84484.1   | 2.25651177907517   | 2 | 0.323597153711123    |
|            | 1.0789127001445    |   |                      |
| KCTD20     | 0.74712725176282   | 2 | 0.688277192660115    |
|            | 0.251478371898362  |   |                      |
| STK38      | 0.173795436538657  | 2 | 0.916770859748057    |
|            | 0.118551051759376  |   |                      |
| SRSF3      | 26.4325498159227   | 2 | 1.82072659604682e-06 |
|            | 0.366582321724723  |   |                      |
| CDKN1A     | 0.413918265172029  | 2 | 0.813052876677125    |



|                               |   |                                    |
|-------------------------------|---|------------------------------------|
| 0.636940722640546             |   |                                    |
| CPNE5 25.1247472526285 2      |   | 3.50130911586088e-06               |
| 0.590295996657777             |   |                                    |
| PPIL1 1.21775159687766 2      |   | 0.543962048449811                  |
| 0.331011305779262             |   |                                    |
| C6orf89 0.137147868243163     | 2 | 0.933724423456425                  |
| 0.12481036128062              |   |                                    |
| MTCH1 1.89861207213067 2      |   | 0.3870095009229 0.0982999356924926 |
| FGD2 2.70454175440007 2       |   | 0.258652225778847                  |
| 0.490481615419417             |   |                                    |
| PIM1 21.0494145202114 2       |   | 2.68644351337777e-05               |
| 0.580282960529903             |   |                                    |
| TBC1D22B 0.867773857851052    | 2 | 0.6479855197622                    |
| 0.461378682527995             |   |                                    |
| RNF8 1.97133348402769 2       |   | 0.373190322301254                  |
| 0.259329920527455             |   |                                    |
| CMTR1 1.28112395544375 2      |   | 0.526996180696701                  |
| 0.500741153908772             |   |                                    |
| CCDC167 3.04367544303268 2    |   | 0.218310324504672                  |
| 0.190420781727716             |   |                                    |
| ZFAND3 1.68177471611177 2     |   | 0.431327611533407                  |
| 0.30482489395445              |   |                                    |
| GL01 1.65585318319081 2       |   | 0.436954332517572                  |
| 0.095690887518256             |   |                                    |
| SAYSD1 1.0262331227393 2      |   | 0.598627010754649                  |
| 0.258530658128182             |   |                                    |
| OARD1 4.13498257565534 2      |   | 0.126502742927579                  |
| 0.250340038310488             |   |                                    |
| NFYA 1.60855619853429 2       |   | 0.447410796187079                  |
| 0.695977798831711             |   |                                    |
| FOXP4 0.0344877412701224      | 2 | 0.982903953993001                  |
| 0.11202526916206              |   |                                    |
| TFEB 1.17066786613587 2       |   | 0.556919856800915                  |
| 0.170165359292593             |   |                                    |
| AL365205.1 1.02815403311414 2 |   | 0.598052332357443                  |
| 0.700843016893669             |   |                                    |
| USP49 0.162748966569563       | 2 | 0.921848409976936                  |
| 0.182366568153407             |   |                                    |
| MED20 0.62521090686635 2      |   | 0.731538481634601                  |
| 0.322319049279886             |   |                                    |
| BYSL 0.0710920201814402       | 2 | 0.965078329866975                  |
| 0.0639575114504075            |   |                                    |
| CCND3 0.212047136887562       | 2 | 0.899403450286471                  |
| 0.0462965335596617            |   |                                    |
| TAF8 0.000457793646710929     | 2 | 0.999771129371524                  |
| 0.00261503308358975           |   |                                    |
| GUCA1A 0.129429533268153      | 2 | 0.937334784406706                  |
| 0.360031786293961             |   |                                    |
| MRPS10 0.480110435832136      | 2 | 0.786584426314544                  |
| 0.0966484878735651            |   |                                    |

|          |                    |   |                     |
|----------|--------------------|---|---------------------|
| TRERF1   | 0.817629120390984  | 2 | 0.664437434046489   |
|          | 0.443626926190305  |   |                     |
| UBR2     | 0.393845920306562  | 2 | 0.821253900150178   |
|          | 0.240753784479845  |   |                     |
| TBCC     | 6.07220272733441   | 2 | 0.0480217443352188  |
|          | 0.273520928261054  |   |                     |
| BICRAL   | 1.74476250775293   | 2 | 0.417955106109834   |
|          | 0.489185261443488  |   |                     |
| RPL7L1   | 0.055632299544171  | 2 | 0.972567157058916   |
|          | 0.0318220909265138 |   |                     |
| C6orf226 | 10.9119042205176   | 2 | 0.00427080856467643 |
|          | 0.811639690791754  |   |                     |
| CNPY3    | 3.78295768702118   | 2 | 0.150848562386209   |
|          | 0.287098593255718  |   |                     |
| GNMT     | 0.0337920433454121 | 2 | 0.983245915585537   |
|          | 0.191132899295425  |   |                     |
| PEX6     | 0.85746113067388   | 2 | 0.651335397874762   |
|          | 0.382185856419339  |   |                     |
| PPP2R5D  | 0.276720872515063  | 2 | 0.870784772770694   |
|          | 0.323003171610808  |   |                     |
| MEA1     | 1.0109361006133    | 2 | 0.603223170552397   |
|          | 0.14056321133077   |   |                     |
| KLHDC3   | 4.68698937712785   | 2 | 0.0959915906675746  |
|          | 0.259083821303568  |   |                     |
| RRP36    | 0.939364809724723  | 2 | 0.625200797488407   |
|          | 0.163430512099192  |   |                     |
| CUL7     | 0.337560891286716  | 2 | 0.844694339350888   |
|          | 0.585173394161182  |   |                     |
| KLC4     | 1.52963237405687   | 2 | 0.465419473248584   |
|          | 0.476870759736115  |   |                     |
| MRPL2    | 0.444711819723997  | 2 | 0.800630361378556   |
|          | 0.0560689075456494 |   |                     |
| SRF      | 0.299278108829318  | 2 | 0.861018701243419   |
|          | 0.230745265834439  |   |                     |
| CUL9     | 0.826479201626683  | 2 | 0.661503766997745   |
|          | 0.583635868987107  |   |                     |
| DNPH1    | 7.25336090905156   | 2 | 0.0266043523466186  |
|          | 0.696060903768928  |   |                     |
| CRIP3    | 0.072423783126839  | 2 | 0.964435915996897   |
|          | 0.0884722399272636 |   |                     |
| ZNF318   | 9.49388643463264   | 2 | 0.00867818201679449 |
|          | 0.781319964796403  |   |                     |
| ABCC10   | 1.19578909058216   | 2 | 0.549968351416107   |
|          | 0.879875840390296  |   |                     |
| TJAP1    | 0.094735184264501  | 2 | 0.953736747021681   |
|          | 0.11880269580222   |   |                     |
| POLR1C   | 3.69672673355909   | 2 | 0.157494716583682   |
|          | 0.55867091604204   |   |                     |
| YIPF3    | 0.191140290655805  | 2 | 0.90885460751321    |
|          | 0.0709873379851305 |   |                     |

|            |                     |   |                      |
|------------|---------------------|---|----------------------|
| XP05       | 1.99938396474268    | 2 | 0.367992771977592    |
|            | 0.896817245489549   |   |                      |
| POLH       | 0.00458766870197746 | 2 | 0.99770879447661     |
|            | 0.024547877718256   |   |                      |
| GTPBP2     | 2.10770030594576    | 2 | 0.348593025602844    |
|            | 1.74233607055431    |   |                      |
| MAD2L1BP   | 0.0140912964540887  | 2 | 0.9929791141626      |
|            | 0.029583057560963   |   |                      |
| MRPS18A    | 5.77448375394405    | 2 | 0.055729710228643    |
|            | 0.200901790208017   |   |                      |
| MRPL14     | 3.31670404085873    | 2 | 0.190452583591407    |
|            | 0.205657651782874   |   |                      |
| TMEM63B    | 5.12988128665325    | 2 | 0.0769237472440678   |
|            | 2.38927082894101    |   |                      |
| SLC29A1    | 4.25444693893043    | 2 | 0.119167707717288    |
|            | 2.51240879206385    |   |                      |
| HSP90AB1   | 48.8489568486966    | 2 | 2.46935805137127e-11 |
|            | 0.402343282856868   |   |                      |
| SLC35B2    | 4.80056999275903    | 2 | 0.0906921026850072   |
|            | 0.653803078987097   |   |                      |
| NFKBIE     | 11.1966261642321    | 2 | 0.00370410697336898  |
|            | 0.830759746348544   |   |                      |
| CDC5L      | 0.503568290448996   | 2 | 0.777412528165888    |
|            | 0.12253472112943    |   |                      |
| SUPT3H     | 2.9766874116505     | 2 | 0.225746248260274    |
|            | 1.87062329152607    |   |                      |
| ENPP4      | 2.10126755590032    | 2 | 0.349716036547528    |
|            | 0.655918648743698   |   |                      |
| ENPP5      | 0.127699200141626   | 2 | 0.93814608602567     |
|            | 0.265461120228387   |   |                      |
| CYP39A1    | 2.62237945466062    | 2 | 0.269499234972184    |
|            | 1.31112149198228    |   |                      |
| AL355353.1 | 0.329742949264609   | 2 | 0.848002686941381    |
|            | 0.528987314458143   |   |                      |
| CD2AP      | 4.72490262081089    | 2 | 0.094189053370953    |
|            | 0.624134928626527   |   |                      |
| MUT        | 0.771894207438133   | 2 | 0.679806483964039    |
|            | 0.279235776405868   |   |                      |
| CENPQ      | 0.690948355138102   | 2 | 0.707884610869336    |
|            | 0.318910137764169   |   |                      |
| MCM3       | 0.646869766485774   | 2 | 0.72365907872065     |
|            | 0.125994288542753   |   |                      |
| PAQR8      | 0.514395850623941   | 2 | 0.773215159767601    |
|            | 0.454512539830643   |   |                      |
| EFHC1      | 2.19981529816755    | 2 | 0.332901826067165    |
|            | 0.508961102405396   |   |                      |
| TRAM2      | 0.382094236317178   | 2 | 0.826093663221933    |
|            | 0.362681799461153   |   |                      |
| TRAM2-AS1  | 0.664979464529409   | 2 | 0.717136032189133    |
|            | 0.491249087366702   |   |                      |

|            |                     |   |                      |
|------------|---------------------|---|----------------------|
| TMEM14A    | 6.04522114540316    | 2 | 0.0486739853812851   |
|            | 0.491671036744018   |   |                      |
| GSTA4      | 7.08486477065128    | 2 | 0.0289428412502585   |
|            | 1.40704073833613    |   |                      |
| FBX09      | 2.27791827213104    | 2 | 0.320152083207399    |
|            | 0.291661570255819   |   |                      |
| ELOVL5     | 0.77745350583075    | 2 | 0.677919484230873    |
|            | 0.123428167010969   |   |                      |
| GCLC       | 0.0980988205296939  | 2 | 0.952134083339       |
|            | 0.140395446827527   |   |                      |
| LRRC1      | 0.242166874354721   | 2 | 0.885960034504335    |
|            | 0.307258164367979   |   |                      |
| KIAA1586   | 2.74953915214728    | 2 | 0.252897862809949    |
|            | 0.706338780401146   |   |                      |
| ZNF451     | 4.0006896316617     | 2 | 0.1352886255331      |
|            | 0.0672208847617237  | 2 | 0.4449250992463      |
| BAG2       | 0.0749855496297538  |   | 0.966948113282201    |
| PRIM2      | 0.00180860901801294 | 2 | 0.999096104251092    |
|            | 0.0185628373149158  |   |                      |
| AL021368.2 | 0.521430250244881   | 2 | 0.770500384556281    |
|            | 0.343346840650351   |   |                      |
| KHDRBS2    | 0.855454121428583   | 2 | 0.651989344021537    |
|            | 1.0935194427757     |   |                      |
| PTP4A1     | 5.36271656242853    | 2 | 0.0684700893284098   |
|            | 0.279605326081782   |   |                      |
| PHF3       | 16.9418357149644    | 2 | 0.000209472549153267 |
|            | 0.735469525490159   |   |                      |
| LMBRD1     | 3.15292440986818    | 2 | 0.206705086403961    |
|            | 0.373640576083826   |   |                      |
| COL19A1    | 1.50977600418087    | 2 | 0.470063257884768    |
|            | 2.25301774004268    |   |                      |
| FAM135A    | 0.786214974142106   | 2 | 0.674956194622501    |
|            | 0.463821434860989   |   |                      |
| SDHAF4     | 2.09616844893628    | 2 | 0.350608793868902    |
|            | 0.721763344418233   |   |                      |
| SMAP1      | 50.5464372086596    | 2 | 1.05676578598946e-11 |
|            | 0.504466710901986   |   |                      |
| B3GAT2     | 23.969673892228     | 2 | 6.23808729305342e-06 |
|            | 1.13805667489382    |   |                      |
| OGFRL1     | 0.0666122209744424  | 2 | 0.967242431215464    |
|            | 0.0714655657131332  |   |                      |
| KCNQ5      | 0.132878465449321   | 2 | 0.935719775269942    |
|            | 0.298807515585495   |   |                      |
| KHDC1      | 0.00155547914497123 | 2 | 0.999222562788545    |
|            | 0.0193102188097881  |   |                      |
| AC019205.1 | 0.642874692387448   | 2 | 0.725106059258836    |
|            | 0.341565713319625   |   |                      |
| DDX43      | 4.32250544946471    | 2 | 0.115180740859868    |
|            | 3.9868076177389     |   |                      |
| CGAS       | 10.7051514301138    | 2 | 0.00473593685222395  |

|                             |   |                                    |
|-----------------------------|---|------------------------------------|
| 1.24993357568082            |   |                                    |
| MT01 6.03383145405635 2     |   | 0.0489519669962654                 |
| 0.798091057858092           |   |                                    |
| EEF1A1 10.4317039493856 2   |   | 0.00542980544845051                |
| 0.115905320587383           |   |                                    |
| SLC17A5 1.05906581988942 2  |   | 0.588879965425076                  |
| 0.336802416831014           |   |                                    |
| COX7A2 7.1767810457243 2    |   | 0.0276427850698808                 |
| 0.145613685972204           |   |                                    |
| TMEM30A 0.923520576367586   | 2 | 0.630173381843812                  |
| 0.297770850676107           |   |                                    |
| SENP6 2.95609895469047 2    |   | 0.228082134161954                  |
| 0.314523519251343           |   |                                    |
| MY06 16.7974209540577 2     |   | 0.000225157482801719               |
| 1.50732309059792            |   |                                    |
| IRAK1BP1 0.0178259456203379 | 2 | 0.991126629985103                  |
| 0.127820729395821           |   |                                    |
| PHIP 1.46714889823678 2     |   | 0.480189505860651                  |
| 0.139987699931958           |   |                                    |
| HMG3 3.00548716167629 2     |   | 0.222518823525829                  |
| 0.0946934753568473          |   |                                    |
| HMG3-AS1 3.38824240997698 2 |   | 0.183760646030145                  |
| 1.30134386875943            |   |                                    |
| TTK 1.91995009321995 2      |   | 0.382902440569844                  |
| 1.46406749178016            |   |                                    |
| BCKDHB 9.12527747878192 2   |   | 0.0104344886877396                 |
| 1.04508041160949            |   |                                    |
| IBTK 2.32201267792804 2     |   | 0.313170866207433                  |
| 0.444694275465941           |   |                                    |
| UBE3D 3.27261466530174 2    |   | 0.19469767022461 0.830509391084826 |
| DOPEY1 0.723024586768613    | 2 | 0.696622032180498                  |
| 0.51291221205672            |   |                                    |
| PGM3 1.23118848134244 2     |   | 0.540319719937985                  |
| 0.562386543899465           |   |                                    |
| RWDD2A 1.31950643428217 2   |   | 0.516978900281536                  |
| 0.423890850862161           |   |                                    |
| CYB5R4 0.0532089122428458   | 2 | 0.973746324758703                  |
| 0.0386709320306224          |   |                                    |
| CEP162 1.73040354497917 2   |   | 0.420966604577681                  |
| 0.540891743291241           |   |                                    |
| SNX14 1.48632778505617 2    |   | 0.475606763858855                  |
| 0.27152101764641            |   |                                    |
| SYNCRIP 1.23423925491569 2  |   | 0.539496151666407                  |
| 0.13793247285362            |   |                                    |
| ZNF292 8.89959024545352 2   |   | 0.0116809598884705                 |
| 0.563050848995218           |   |                                    |
| SMIM8 0.501548202845767     | 2 | 0.778198145558458                  |
| 0.187925939362733           |   |                                    |
| SLC35A1 0.0425942077896351  | 2 | 0.978928078015111                  |
| 0.0608501603845566          |   |                                    |

|            |                      |   |                      |
|------------|----------------------|---|----------------------|
| RARS2      | 0.000251188084683204 | 2 | 0.99987441384426     |
|            | 0.00370853968422305  |   |                      |
| ORC3       | 0.327136015076216    | 2 | 0.849108751242207    |
|            | 0.195026880513818    |   |                      |
| AKIRIN2    | 0.00195142472281468  | 2 | 0.999024763491121    |
|            | 0.0052126066871596   |   |                      |
| CNR1       | 10.8419971624909     | 2 | 0.00442272798878041  |
|            | 0.860286716750133    |   |                      |
| RNGTT      | 0.0204090754656332   | 2 | 0.989847351909092    |
|            | 0.0211738392568792   |   |                      |
| PNRC1      | 0.460085711294383    | 2 | 0.794499552981196    |
|            | 0.086596820802562    |   |                      |
| PM20D2     | 2.65045969374731     | 2 | 0.265741872130364    |
|            | 0.665380510241734    |   |                      |
| UBE2J1     | 9.23846836542983     | 2 | 0.00986034439266981  |
|            | 0.199539673615663    |   |                      |
| LYRM2      | 0.206084004064967    | 2 | 0.902089083110814    |
|            | 0.0589222774429121   |   |                      |
| MDN1       | 1.57459226505618     | 2 | 0.45507359196467     |
|            | 0.644476136022091    |   |                      |
| CASP8AP2   | 5.64169736693029     | 2 | 0.0595553775908627   |
|            | 0.95253848254225     |   |                      |
| BACH2      | 49.2416547104629     | 2 | 2.02913241764691e-11 |
|            | 1.26179804528962     |   |                      |
| AL132996.1 | 5.56218150724395     | 2 | 0.0619708755422744   |
|            | 1.35495692356115     |   |                      |
| MAP3K7     | 3.85464559745391     | 2 | 0.145537310057975    |
|            | 0.361971972149525    |   |                      |
| MANEA-DT   | 0.965583225735331    | 2 | 0.617058397006372    |
|            | 0.425474922630666    |   |                      |
| MANEA      | 3.40289084036376     | 2 | 0.182419660343077    |
|            | 0.879199826718906    |   |                      |
| UFL1       | 6.13568603363981     | 2 | 0.0465213925743304   |
|            | 0.452631288619222    |   |                      |
| NDUFAF4    | 1.12808630583945     | 2 | 0.568904240770382    |
|            | 0.203877427498169    |   |                      |
| MMS22L     | 4.87609343632962     | 2 | 0.0873312675510248   |
|            | 1.12160235969447     |   |                      |
| FBXL4      | 0.0475084695862106   | 2 | 0.976525676303862    |
|            | 0.102110676841052    |   |                      |
| COQ3       | 2.17222469068199     | 2 | 0.337526131384964    |
|            | 0.699582709013545    |   |                      |
| PNISR      | 5.9403223676278      | 2 | 0.0512950417350939   |
|            | 0.177284557187652    |   |                      |
| USP45      | 2.94968898195056     | 2 | 0.22881430696837     |
|            | 1.83422164429084     |   |                      |
| TSTD3      | 1.54664858909568     | 2 | 0.461476432023585    |
|            | 0.598787913724658    |   |                      |
| CCNC       | 1.35109074837974     | 2 | 0.508878815543341    |
|            | 0.153279836798018    |   |                      |
| ASCC3      | 1.52536175533117     | 2 | 0.466414349613858    |
|            | 0.378134154245344    |   |                      |

|          |                     |   |                  |                      |
|----------|---------------------|---|------------------|----------------------|
| PREP     | 1.7226084197618     | 2 | 0.42261054988397 | 0.539694124980269    |
| ATG5     | 0.00465354066397602 |   | 2                | 0.997675934499853    |
|          | 0.0124269996070138  |   |                  |                      |
| PRDM1    | 90.8529000020077    | 2 | 0                | 2.93741439892695     |
| CRYBG1   | 5.69174477517132    | 2 |                  | 0.0580835732426203   |
|          | 0.735701654190937   |   |                  |                      |
| RTN4IP1  | 19.7191179222691    | 2 |                  | 5.22453868413431e-05 |
|          | 1.01098415313191    |   |                  |                      |
| QRSL1    | 4.19224408983001    | 2 |                  | 0.122932230755702    |
|          | 0.303506716676453   |   |                  |                      |
| CD24     | 31.9962937973991    | 2 |                  | 1.12743907099144e-07 |
|          | 1.58515204153158    |   |                  |                      |
| C6orf203 | 0.0409654998117812  |   | 2                | 0.979725596687496    |
|          | 0.0512837734375049  |   |                  |                      |
| PDSS2    | 0.0821919378426981  |   | 2                | 0.959737020601406    |
|          | 0.109308047650234   |   |                  |                      |
| SOBP     | 0.571256560056243   |   | 2                | 0.751541927174924    |
|          | 0.25356299762502    |   |                  |                      |
| SEC63    | 3.23853851937177    | 2 |                  | 0.198043364491132    |
|          | 0.330199144761342   |   |                  |                      |
| OSTM1    | 0.601781634778928   |   | 2                | 0.740158580781272    |
|          | 0.264915932469331   |   |                  |                      |
| SNX3     | 21.022116298745     | 2 |                  | 2.72336246061045e-05 |
|          | 0.235807402744193   |   |                  |                      |
| AFG1L    | 0.443733110138941   |   | 2                | 0.8010222495613      |
|          | 0.434918622683615   |   |                  |                      |
| FOXO3    | 1.1512695979257     | 2 |                  | 0.562347777692372    |
|          | 0.385675698776378   |   |                  |                      |
| CEP57L1  | 0.15516451193814    | 2 |                  | 0.925350905630596    |
|          | 0.229229004733613   |   |                  |                      |
| CD164    | 2.88664082651335    | 2 |                  | 0.236142365248294    |
|          | 0.166974635728119   |   |                  |                      |
| SMPD2    | 0.375715160561571   |   | 2                | 0.828732726710573    |
|          | 0.200791385633119   |   |                  |                      |
| MICAL1   | 6.65923106083423    | 2 |                  | 0.0358068690735821   |
|          | 0.934339724263372   |   |                  |                      |
| ZBTB24   | 0.218585676933776   |   | 2                | 0.896467858783085    |
|          | 0.140659051146759   |   |                  |                      |
| AK9      | 3.26311700786808    | 2 |                  | 0.195624454941323    |
|          | 0.77476544037791    |   |                  |                      |
| FIG4     | 0.583667989591916   |   | 2                | 0.746892513726735    |
|          | 0.240580381479646   |   |                  |                      |
| WASF1    | 0.33671202706408    | 2 |                  | 0.845052930846246    |
|          | 0.259444076444135   |   |                  |                      |
| CDC40    | 4.60824754956262    | 2 |                  | 0.0998462501376643   |
|          | 0.319825855484569   |   |                  |                      |
| CDK19    | 2.54108799659162    | 2 |                  | 0.280678891401021    |
|          | 0.508348581392025   |   |                  |                      |
| AMD1     | 1.30022885746848    | 2 |                  | 0.521986043141251    |
|          | 0.0906079986014172  |   |                  |                      |

|              |                      |   |                    |
|--------------|----------------------|---|--------------------|
| GTF3C6       | 0.558483943589016    | 2 | 0.756356864043101  |
|              | 0.0832028317638164   |   |                    |
| RPF2         | 2.84213929944146     | 2 | 0.241455605795685  |
|              | 0.349724604274981    |   |                    |
| MFSD4B       | 0.725603667385305    | 2 | 0.695724288952765  |
|              | 0.343579749283774    |   |                    |
| AL080317.1   | 0.643216618064354    | 2 | 0.724982103664967  |
|              | 0.827234712248619    |   |                    |
| REV3L        | 0.619008942385362    | 2 | 0.733810490383124  |
|              | 0.255987688295945    |   |                    |
| TRAF3IP2-AS1 | 0.469701356427482    | 2 | 0.790688907894283  |
|              | 0.109615425160574    |   |                    |
| TRAF3IP2     | 3.3435651263554      | 2 | 0.187911802254087  |
|              | 0.681578559851402    |   |                    |
| FYN          | 1.07681618932012     | 2 | 0.583676671210171  |
|              | 0.363353693249153    |   |                    |
| TUBE1        | 5.82670532704107     | 2 | 0.0542933968982436 |
|              | 1.10993082795713     |   |                    |
| FAM229B      | 2.87130996830613     | 2 | 0.237959453289757  |
|              | 6.25974957461784     |   |                    |
| MARCKS       | 6.93187932543877     | 2 | 0.0312436331511869 |
|              | 1.66427339951552     |   |                    |
| HDAC2        | 0.270039044232394    | 2 | 0.873698855070975  |
|              | 0.0733719339542697   |   |                    |
| NT5DC1       | 1.36112581085903     | 2 | 0.506331895158812  |
|              | 0.226840116319329    |   |                    |
| TSPYL4       | 1.917192116901       | 2 | 0.383430822734266  |
|              | 0.793054390671283    |   |                    |
| DSE          | 0.147466337602777    | 2 | 0.928919525485608  |
|              | 0.284956362553072    |   |                    |
| TSPYL1       | 0.472924727857814    | 2 | 0.789415592244234  |
|              | 0.0777336256348316   |   |                    |
| CALHM6       | 4.72894708951226     | 2 | 0.0939987734918662 |
|              | 0.717692549219427    |   |                    |
| RWDD1        | 0.000833998959308059 | 2 | 0.999583087452545  |
|              | 0.00234966156532992  |   |                    |
| ZUP1         | 1.17655165973167     | 2 | 0.555283863698865  |
|              | 0.329653171483765    |   |                    |
| KPNA5        | 0.0808235389060771   | 2 | 0.960393896852185  |
|              | 0.108056768046457    |   |                    |
| GOPC         | 0.330756276467876    | 2 | 0.84757314367198   |
|              | 0.0418739072227341   |   |                    |
| NUS1         | 1.1975948605375      | 2 | 0.549472017353422  |
|              | 0.235957345601632    |   |                    |
| CEP85L       | 0.0058620407901178   | 2 | 0.997073270851618  |
|              | 0.0220917868440079   |   |                    |
| MCM9         | 3.36907573447652     | 2 | 0.185530151708888  |
|              | 2.50333834242501     |   |                    |
| ASF1A        | 3.81362833782306     | 2 | 0.148552897965731  |
|              | 0.232401988165883    |   |                    |



|           |                   |   |                      |
|-----------|-------------------|---|----------------------|
| FAM184A   | 10.1898759564254  | 2 | 0.00612768667314378  |
|           | 1.76193900089551  |   |                      |
| MAN1A1    | 3.2623636727908   | 2 | 0.195698154202451    |
|           | 0.997286071693953 |   |                      |
| HSF2      | 0.603570356209808 | 2 | 0.739496907954621    |
|           | 0.262958081797825 |   |                      |
| SERINC1   | 0.902511635669305 | 2 | 0.636827909401487    |
|           | 0.208477108506389 |   |                      |
| PKIB      | 0.684967843148587 | 2 | 0.710004535048946    |
|           | 0.935082227970071 |   |                      |
| SMPDL3A   | 3.6983922315091   | 2 | 0.157363617613721    |
|           | 0.722227805524737 |   |                      |
| HDDC2     | 1.13889638213832  | 2 | 0.565837586802364    |
|           | 0.128501286049366 |   |                      |
| NCOA7     | 7.05811023718149  | 2 | 0.0293326186230919   |
|           | 0.474921233728849 |   |                      |
| HINT3     | 1.56938582388666  | 2 | 0.456259792207417    |
|           | 0.239343809565456 |   |                      |
| TRMT11    | 1.08347184990428  | 2 | 0.581737522671147    |
|           | 0.30955369305371  |   |                      |
| CENPW     | 3.43682981828017  | 2 | 0.179350209097787    |
|           | 0.733698746454907 |   |                      |
| RNF146    | 5.06138356234578  | 2 | 0.0796039327318767   |
|           | 0.570870356861015 |   |                      |
| ECHDC1    | 1.38604861012417  | 2 | 0.500061441523681    |
|           | 0.101942691816843 |   |                      |
| ARHGAP18  | 3.55911695306857  | 2 | 0.168712621407659    |
|           | 1.31750653107488  |   |                      |
| L3MBTL3   | 1.28943799346078  | 2 | 0.524809994712729    |
|           | 0.718889284321708 |   |                      |
| EPB41L2   | 7.44521786700086  | 2 | 0.0241708254381164   |
|           | 1.30733262188656  |   |                      |
| AKAP7     | 1.79992661076802  | 2 | 0.406584578931861    |
|           | 0.864364643455905 |   |                      |
| MED23     | 3.82516719164384  | 2 | 0.147698300517877    |
|           | 0.594768748486236 |   |                      |
| LINC01013 | 11.7210360098653  | 2 | 0.00284976710685758  |
|           | 1.2488011968961   |   |                      |
| STX7      | 33.8476123095881  | 2 | 4.46770381801187e-08 |
|           | 0.376643454738431 |   |                      |
| VNN2      | 15.1591424018433  | 2 | 0.000510780198141103 |
|           | 0.404342643771462 |   |                      |
| RPS12     | 30.2346999553071  | 2 | 2.72030953429869e-07 |
|           | 0.156439970897081 |   |                      |
| TBPL1     | 2.39001067304343  | 2 | 0.302702338800228    |
|           | 0.202219531523444 |   |                      |
| SGK1      | 17.8776500496072  | 2 | 0.000131195100644077 |
|           | 0.891990052596758 |   |                      |
| HBS1L     | 0.525743450841648 | 2 | 0.768840513679384    |
|           | 0.149743043366986 |   |                      |

|            |                      |   |                      |
|------------|----------------------|---|----------------------|
| MYB        | 0.500980062163017    | 2 | 0.77841923997302     |
|            | 0.408033993090667    |   |                      |
| AHI1       | 3.99858540828268     | 2 | 0.135431039181877    |
|            | 0.764372748581807    |   |                      |
| BCLAF1     | 3.83089304246069     | 2 | 0.147276056016205    |
|            | 0.209752989600228    |   |                      |
| PEX7       | 2.03519980803591     | 2 | 0.361461442068038    |
|            | 0.810604528656836    |   |                      |
| IFNGR1     | 0.286903364957946    | 2 | 0.866362659671989    |
|            | 0.124996773588885    |   |                      |
| AL357060.1 | 7.96185872384231     | 2 | 0.0186682816830808   |
|            | 1.31359226718378     |   |                      |
| TNFAIP3    | 9.95842374641326     | 2 | 0.00687948232582891  |
|            | 0.948436743568894    |   |                      |
| HEBP2      | 3.46730096685442     | 2 | 0.176638415981931    |
|            | 0.366582558090274    |   |                      |
| CCDC28A    | 0.545013262820339    | 2 | 0.761468379549306    |
|            | 0.0542935723945616   |   |                      |
| REPS1      | 1.01251128209245     | 2 | 0.602748264609681    |
|            | 0.162071116693794    |   |                      |
| ABRACL     | 73.5357946385566     | 2 | 1.11022302462516e-16 |
|            | 0.861937664107468    |   |                      |
| HECA       | 0.321068623226885    | 2 | 0.851688600260579    |
|            | 0.252623357658808    |   |                      |
| TXLNB      | 5.896321570047       | 2 | 0.0524360584988441   |
|            | 1.10762707729834     |   |                      |
| AL158850.1 | 0.0215211825189227   | 2 | 0.989297096798048    |
|            | 0.0746745524465779   |   |                      |
| CITED2     | 1.00428416146832     | 2 | 0.605232812614684    |
|            | 0.19584379553149     |   |                      |
| VTA1       | 0.156493983099909    | 2 | 0.924735996357499    |
|            | 0.0975438235895653   |   |                      |
| HIVEP2     | 1.31088638233933     | 2 | 0.519211901458213    |
|            | 0.727354849994645    |   |                      |
| AIG1       | 0.0894467888354566   | 2 | 0.956261952648578    |
|            | 0.103800182381691    |   |                      |
| ADAT2      | 1.48332894200718     | 2 | 0.476320433790099    |
|            | 0.848829206228729    |   |                      |
| PEX3       | 0.160267811314698    | 2 | 0.922992744161167    |
|            | 0.115442546123645    |   |                      |
| FUCA2      | 0.000544866232965069 | 2 | 0.999727603990049    |
|            | 0.00992297758593954  |   |                      |
| PHACTR2    | 1.3918495586547      | 2 | 0.498613127595489    |
|            | 1.39420888474921     |   |                      |
| LTV1       | 1.50433291641545     | 2 | 0.471344298081606    |
|            | 0.258238709633423    |   |                      |
| PLAGL1     | 1.00109426496164     | 2 | 0.606198897855211    |
|            | 0.294851300465402    |   |                      |
| SF3B5      | 0.677135071752301    | 2 | 0.712790638822994    |
|            | 0.0685039628103566   |   |                      |

|            |                     |   |                     |
|------------|---------------------|---|---------------------|
| STX11      | 4.74628126733074    | 2 | 0.0931875981070882  |
|            | 0.574935310620229   |   |                     |
| UTRN       | 3.10666312578038    | 2 | 0.211542032949792   |
|            | 0.421488265145475   |   |                     |
| EPM2A      | 2.66541168741105    | 2 | 0.263762594491465   |
|            | 1.39643172236697    |   |                     |
| FBX030     | 3.20089139850874    | 2 | 0.201806552917298   |
|            | 0.869947757553352   |   |                     |
| SHPRH      | 3.61545489688512    | 2 | 0.164026472181606   |
|            | 0.558134580316709   |   |                     |
| STXBP5     | 2.88213668913049    | 2 | 0.236674773360587   |
|            | 1.23645755460228    |   |                     |
| TAB2       | 1.71805287443199    | 2 | 0.423574257779486   |
|            | 0.554394241668408   |   |                     |
| SUM04      | 4.27946635612598    | 2 | 0.117686240103421   |
|            | 1.44443587938375    |   |                     |
| ZC3H12D    | 0.640750428854726   | 2 | 0.725876626587933   |
|            | 0.186401079688203   |   |                     |
| PPIL4      | 1.44527326424502    | 2 | 0.485470559749415   |
|            | 0.260400930021195   |   |                     |
| GINM1      | 2.3319457150796     | 2 | 0.311619353281079   |
|            | 0.2661540950244     |   |                     |
| KATNA1     | 2.89291104862289    | 2 | 0.23540319200904    |
| LATS1      | 0.0741488386031035  | 2 | 0.506270415849076   |
|            | 0.16121067535056    |   | 0.963604421912604   |
| NUP43      | 2.29576870239115    | 2 | 0.317307370709946   |
|            | 0.624594808550979   |   |                     |
| PCMT1      | 7.49228087588209    | 2 | 0.0236086894439449  |
|            | 0.282235580915516   |   |                     |
| PLEKHG1    | 12.7787208823848    | 2 | 0.00167932988823061 |
|            | 0.93315855128916    |   |                     |
| MTHFD1L    | 1.07418262736443    | 2 | 0.584445751792249   |
|            | 0.384731423911887   |   |                     |
| ZBTB2      | 3.26820404216338    | 2 | 0.195127513043712   |
|            | 0.552596449219221   |   |                     |
| RMND1      | 0.273538345222059   | 2 | 0.872171523974302   |
|            | 0.134806749875104   |   |                     |
| ARMT1      | 5.75494035500823    | 2 | 0.0562769536028203  |
|            | 0.32887807838671    |   |                     |
| SYNE1      | 0.00278246271482308 | 2 | 0.998609735956296   |
|            | 0.0106299424856923  |   |                     |
| FBX05      | 0.00679719341816792 | 2 | 0.996607171983708   |
|            | 0.0330193291813292  |   |                     |
| AL080276.2 | 0.0232644768765937  | 2 | 0.98843515448396    |
|            | 0.11578216261711    |   |                     |
| MTRF1L     | 0.447003108290964   | 2 | 0.799713648995276   |
|            | 0.158368322432396   |   |                     |
| RGS17      | 1.91056245574383    | 2 | 0.384703939868278   |
|            | 1.08808724272793    |   |                     |
| SCAF8      | 10.2177586162096    | 2 | 0.00604285130473747 |

|                  |                    |   |                                  |
|------------------|--------------------|---|----------------------------------|
| 1.65640681357794 |                    |   |                                  |
| TIAM2            | 0.512641687021016  | 2 | 0.773893630206392                |
|                  | 0.265937466528272  |   |                                  |
| TFB1M            | 0.944271947951113  | 2 | 0.623668704438837                |
|                  | 0.216957881028406  |   |                                  |
| ARID1B           | 7.78596943949397   | 2 | 0.0203844133885603               |
|                  | 0.280853672706881  |   |                                  |
| TMEM242          | 3.33616037748804   | 2 | 0.188608811605147                |
|                  | 0.338625357233828  |   |                                  |
| ZDHC14           | 5.64562327392732   | 2 | 0.0594385878180131               |
|                  | 1.82705500307179   |   |                                  |
| SNX9             | 7.48856734146363   | 2 | 0.0236525660060325               |
|                  | 1.79717688532635   |   |                                  |
| SYNJ2            | 18.7099913553019   | 2 | 8.65320512780654e-05             |
|                  | 1.00535806060539   |   |                                  |
| SERAC1           | 1.08018493438398   | 2 | 0.582694369770681                |
|                  | 0.794127387055112  |   |                                  |
| GTF2H5           | 3.01611314901926   | 2 | 0.221339717489743                |
|                  | 0.2143877270694    |   |                                  |
| TULP4            | 0.110884754344832  | 2 | 0.946066537128762                |
|                  | 0.13177265597632   |   |                                  |
| TMEM181          | 0.74327756580108   | 2 | 0.689603294042333                |
|                  | 0.604131198633094  |   |                                  |
| DYNLT1           | 3.31952405719804   | 2 | 0.190184233125246                |
|                  | 0.349067924718045  |   |                                  |
| EZR              | 177.01850892953    | 2 | 0.630633725320091                |
| AL627422.2       | 2.10792048139869   | 2 | 0.348554651901469                |
|                  | 5.09281959878702   |   |                                  |
| C6orf99          | 2.87123452458961   | 2 | 0.237968429731828                |
|                  | 0.938297163999613  |   |                                  |
| RSPH3            | 4.49528075512389   | 2 | 0.105648220589871                |
|                  | 1.62533709294872   |   |                                  |
| TAGAP            | 28.7172861333414   | 2 | 5.80925644588781e-07             |
|                  | 0.714847659886029  |   |                                  |
| AL356417.1       | 13.4172434984807   | 2 | 0.00122034490736123              |
|                  | 1.90971557382841   |   |                                  |
| SOD2             | 0.479725054480689  | 2 | 0.786736008402922                |
|                  | 0.281527582518723  |   |                                  |
| WTAP             | 2.44508593615265   | 2 | 0.294480359806204                |
|                  | 0.192502711167583  |   |                                  |
| ACAT2            | 1.65992182329122   | 2 | 0.436066331103696                |
|                  | 0.170883579853182  |   |                                  |
| TCP1             | 0.529919775193255  | 2 | 0.767236725067618                |
|                  | 0.0884627666864241 |   |                                  |
| MRPL18           | 9.21018065243528   | 2 | 0.0100007986295932               |
|                  | 0.204886645080746  |   |                                  |
| IGF2R            | 0.411218048477933  | 2 | 0.814151327499476                |
|                  | 0.494154353144388  |   |                                  |
| MAP3K4           | 1.56176281562905   | 2 | 0.4580021466755 0.60665934581988 |
| QKI              | 1.55935450905592   | 2 | 0.458553983647145                |

|                               |   |                                    |  |
|-------------------------------|---|------------------------------------|--|
| 0.75710155709762              |   |                                    |  |
| TBXT 2.54851591386842 2       |   | 0.27963839498402 7.60004549083257  |  |
| SFT2D1 3.41730064343764 2     |   | 0.181110068058774                  |  |
| 0.103546672567562             |   |                                    |  |
| MPC1 5.71670459379832 2       |   | 0.0573631999622622                 |  |
| 0.38371867033887              |   |                                    |  |
| RNASET2 0.0802134076973761    | 2 | 0.960686924690828                  |  |
| 0.0463022872041895            |   |                                    |  |
| FGFR10P 1.51721576446317 2    |   | 0.46831792712987 0.316205985069332 |  |
| CCR6 0.92670456184836 2       |   | 0.62917094853972 0.689366988356011 |  |
| AFDN 1.38450959464362 2       |   | 0.500446390765262                  |  |
| 0.94458541601432              |   |                                    |  |
| WDR27 0.371473073742377       | 2 | 0.830492370279383                  |  |
| 0.424275262735242             |   |                                    |  |
| C6orf120 1.26339979924907 2   |   | 0.53168721747277 0.452563882087558 |  |
| PHF10 13.6407802448232 2      |   | 0.00109129510054717                |  |
| 0.759101865180044             |   |                                    |  |
| TCTE3 2.53232002560181 2      |   | 0.281912084765466                  |  |
| 1.73922826586566              |   |                                    |  |
| ERMARD 1.95824046246042 2     |   | 0.375641431121826                  |  |
| 0.792833195463457             |   |                                    |  |
| FAM120B 0.949424650645771     | 2 | 0.622063982782892                  |  |
| 0.548352022545165             |   |                                    |  |
| PSMB1 2.85366583408204 2      |   | 0.240068034905194                  |  |
| 0.0772828847713067            |   |                                    |  |
| TBP 1.41784718588846 2        |   | 0.492173691668565                  |  |
| 0.411332957803499             |   |                                    |  |
| PDCD2 10.8490734994522 2      |   | 0.00440710728265281                |  |
| 0.394139106281738             |   |                                    |  |
| PRKAR1B 6.43782762490854 2    |   | 0.0399984805254181                 |  |
| 0.85449795582368              |   |                                    |  |
| AC147651.4 0.273246247805129  | 2 | 0.872298912801198                  |  |
| 0.235561591773678             |   |                                    |  |
| DNAAF5 0.790271711206293      | 2 | 0.673588522257497                  |  |
| 0.493450338048037             |   |                                    |  |
| SUN1 0.995712911574507        | 2 | 0.607832179432295                  |  |
| 0.377144249240068             |   |                                    |  |
| COX19 0.48253728629179 2      |   | 0.785630543775875                  |  |
| 0.0523718599733645            |   |                                    |  |
| C7orf50 59.8551886589672 2    |   | 1.00586206031039e-13               |  |
| 0.820447216058889             |   |                                    |  |
| GPR146 7.99024472619796 2     |   | 0.0184051941563294                 |  |
| 4.29059999236232              |   |                                    |  |
| GPER1 41.8952107933704 2      |   | 7.99043720078885e-10               |  |
| 2.65932160292332              |   |                                    |  |
| ZFAND2A 4.66400304042785 2    |   | 0.097101202442473                  |  |
| 0.548882857791183             |   |                                    |  |
| AC091729.3 1.93846667158449 2 |   | 0.379373778936535                  |  |
| 0.904548406553095             |   |                                    |  |
| INTS1 0.151218755535008       | 2 | 0.927178312293773                  |  |

|                    |                    |   |                                    |
|--------------------|--------------------|---|------------------------------------|
| 0.194289954089337  |                    |   |                                    |
| MAFK               | 0.578944106126635  | 2 | 0.748658715336245                  |
| 0.780180056992558  |                    |   |                                    |
| PSMG3              | 1.75081240676914   | 2 | 0.416692723301924                  |
| 0.238849514212695  |                    |   |                                    |
| PSMG3-AS1          | 3.73305180752709   | 2 | 0.154660033412395                  |
| 1.40662783645323   |                    |   |                                    |
| MAD1L1             | 36.1926246555295   | 2 | 1.38315678910317e-08               |
| 0.98364108129589   |                    |   |                                    |
| MRM2               | 5.93792544749246   | 2 | 0.0513565536467054                 |
| 0.506152055910607  |                    |   |                                    |
| NUDT1              | 1.79005307014118   | 2 | 0.408596756353227                  |
| 0.238273120897035  |                    |   |                                    |
| SNX8               | 2.64786289647796   | 2 | 0.2660871351103 0.185097792605529  |
| EIF3B              | 0.350790049304612  | 2 | 0.839125480039144                  |
| 0.0712283705168527 |                    |   |                                    |
| CHST12             | 0.0218336786448746 | 2 | 0.989142533118418                  |
| 0.0538273271310567 |                    |   |                                    |
| BRAT1              | 0.328216008734448  | 2 | 0.848650358985283                  |
| 0.148246266418528  |                    |   |                                    |
| IQCE               | 1.00158538582329   | 2 | 0.606050057668067                  |
| 0.492126884511527  |                    |   |                                    |
| TTYH3              | 0.458759241594538  | 2 | 0.795026667554036                  |
| 0.549049163839354  |                    |   |                                    |
| GNA12              | 0.794610442907739  | 2 | 0.672128846178046                  |
| 0.444325759178181  |                    |   |                                    |
| CARD11             | 1.7696373864331    | 2 | 0.412789007942101                  |
| 0.24576248107238   |                    |   |                                    |
| FOXK1              | 0.906681597886443  | 2 | 0.635501518471492                  |
| 0.374830315649364  |                    |   |                                    |
| AP5Z1              | 5.93711290554181   | 2 | 0.0513774225627751                 |
| 0.69543502380769   |                    |   |                                    |
| RBAK-RBAKDN        | 0.0850917308225    | 2 | 0.958346509556145                  |
| 0.134529464489305  |                    |   |                                    |
| RBAK               | 2.99640116685107   | 2 | 0.223532025710206                  |
| 1.16584355531253   |                    |   |                                    |
| WIPI2              | 0.144245904857548  | 2 | 0.930416491810786                  |
| 0.0557379416539642 |                    |   |                                    |
| FBXL18             | 0.103648379804048  | 2 | 0.949495783116334                  |
| 0.248513958954321  |                    |   |                                    |
| ACTB               | 29.6074773241125   | 2 | 3.72235669843235e-07               |
| 0.18605727265771   |                    |   |                                    |
| RNF216             | 0.0698979498578088 | 2 | 0.965654687599607                  |
| 0.0917119496877657 |                    |   |                                    |
| CCZ1               | 3.06790257576982   | 2 | 0.215681760683537                  |
| 0.218398933046869  |                    |   |                                    |
| PMS2               | 1.95809848641801   | 2 | 0.37566809811021 0.467413197694636 |
| AIMP2              | 0.776042055358326  | 2 | 0.678398077976993                  |
| 0.198943985656905  |                    |   |                                    |
| EIF2AK1            | 0.962638382073141  | 2 | 0.617967636488945                  |

|                   |                    |   |                      |
|-------------------|--------------------|---|----------------------|
| 0.137794801757192 |                    |   |                      |
| USP42             | 4.03819790656139   | 2 | 0.132775047718411    |
| 1.14779745052276  |                    |   |                      |
| FAM220A           | 0.0733294205317241 | 2 | 0.963999300238177    |
| 0.130334033394209 |                    |   |                      |
| RAC1              | 15.9502536788842   | 2 | 0.000343911280477727 |
| 0.283418596368542 |                    |   |                      |
| DAGLB             | 0.829657034046835  | 2 | 0.66045352753155     |
| 0.955626583276672 |                    |   |                      |
| KDELR2            | 7.45153841565427   | 2 | 0.0240945595730312   |
| 0.235086079159997 |                    |   |                      |
| ZDHHC4            | 1.02830925393678   | 2 | 0.598005919071038    |
| 0.187636748266983 |                    |   |                      |
| C7orf26           | 0.174727269009144  | 2 | 0.916343820810414    |
| 0.114107251589877 |                    |   |                      |
| ZNF316            | 0.26139165235201   | 2 | 0.877484641660918    |
| 0.351201165895308 |                    |   |                      |
| ZNF12             | 1.34321675021861   | 2 | 0.510886219954026    |
| 0.618016821354227 |                    |   |                      |
| CCZ1B             | 0.631540127409227  | 2 | 0.729227106671131    |
| 0.128408803806431 |                    |   |                      |
| C1GALT1           | 0.233607178841613  | 2 | 0.889759934266381    |
| 0.139051443477994 |                    |   |                      |
| AC004982.2        | 3.21320479022398   | 2 | 0.200567908240743    |
| 2.36023426609231  |                    |   |                      |
| MIOS              | 3.13087858072024   | 2 | 0.208996182996212    |
| 0.239361091545984 |                    |   |                      |
| RPA3              | 6.64557969407485   | 2 | 0.036052111445937    |
| 0.272659034312994 |                    |   |                      |
| UMAD1             | 2.15937111395631   | 2 | 0.339702325878641    |
| 0.385015872337054 |                    |   |                      |
| AC006042.4        | 0.197265439823777  | 2 | 0.906075430382566    |
| 0.104190906629866 |                    |   |                      |
| GLCCI1            | 3.03503124727238   | 2 | 0.219255925112594    |
| 0.573811349263558 |                    |   |                      |
| ICA1              | 0.147111474885315  | 2 | 0.929084359562102    |
| 0.272431407857577 |                    |   |                      |
| NDUFA4            | 36.0436329882854   | 2 | 1.49013131833797e-08 |
| 0.187660153007843 |                    |   |                      |
| PHF14             | 9.51689476629869   | 2 | 0.00857891883654072  |
| 0.451820524930325 |                    |   |                      |
| TMEM106B          | 0.310729237903902  | 2 | 0.856102969201152    |
| 0.127826840901642 |                    |   |                      |
| ARL4A             | 2.5436239926962    | 2 | 0.280323216658502    |
| 0.884190931288749 |                    |   |                      |
| ANKMY2            | 3.19961213351814   | 2 | 0.201935676237643    |
| 0.705898594651278 |                    |   |                      |
| BZW2              | 2.75762608405723   | 2 | 0.251877343519519    |
| 0.21650392184932  |                    |   |                      |
| TSPAN13           | 2.73010234019781   | 2 | 0.255367608467965    |

|                    |                    |                      |
|--------------------|--------------------|----------------------|
| 0.238501892144152  |                    |                      |
| AHR                | 2.24639328352798 2 | 0.325238460277971    |
| 1.04341638803989   |                    |                      |
| AC073332.1         | 0.552036692941197  | 2 0.758799009349822  |
| 0.625659238863318  |                    |                      |
| SNX13              | 0.0486169909417051 | 2 0.975984576489704  |
| 0.0777404155583007 |                    |                      |
| HDAC9              | 21.6204163554769 2 | 2.01923209315336e-05 |
| 0.594579635781086  |                    |                      |
| TWISTNB            | 1.87694544759569 2 | 0.391224887771279    |
| 0.244110015966717  |                    |                      |
| MACC1              | 3.51251043573842 2 | 0.172690342188397    |
| 1.89574614060554   |                    |                      |
| AC099342.1         | 2.66299453394837 2 | 0.264081564536828    |
| 5.44950610201704   |                    |                      |
| AC004130.1         | 9.15168162424526 2 | 0.0102976371587882   |
| 1.77758285949543   |                    |                      |
| SP4                | 1.29996701220153 2 | 0.522054387402465    |
| 0.916899398500969  |                    |                      |
| CDCA7L             | 50.8767107598335 2 | 8.95905571951516e-12 |
| 1.09857221788326   |                    |                      |
| RAPGEF5            | 1.86186568104269 2 | 0.394185826297983    |
| 0.182534170634531  |                    |                      |
| STEAP1B            | 0.871301417545464  | 2 0.646843623284189  |
| 0.601156232789815  |                    |                      |
| TOMM7              | 8.46257895386391 2 | 0.0145336376697998   |
| 0.231964586831176  |                    |                      |
| FAM126A            | 5.81477811827745 2 | 0.0546181486208163   |
| 0.597017111016925  |                    |                      |
| KLHL7              | 1.68544526114778 2 | 0.430536733781794    |
| 0.423987129642145  |                    |                      |
| NUPL2              | 1.97194067638635 2 | 0.373077040342096    |
| 0.215058607854512  |                    |                      |
| MALSU1             | 0.912461793589973  | 2 0.633667508409008  |
| 0.215453222794924  |                    |                      |
| IGF2BP3            | 7.86522679633449 2 | 0.0195924028384866   |
| 0.511997026545845  |                    |                      |
| TRA2A              | 0.114408717263348  | 2 0.944401053137958  |
| 0.0470647496375122 |                    |                      |
| CCDC126            | 0.0177842995948844 | 2 0.99114726844241   |
| 0.0268034630220032 |                    |                      |
| FAM221A            | 0.715424138772757  | 2 0.69927438852675   |
| 0.397535738578081  |                    |                      |
| MPP6               | 1.20558328554843 2 | 0.547281686585573    |
| 0.308575516089557  |                    |                      |
| GSDME              | 0.347876003174417  | 2 0.840348996347361  |
| 0.345323636642192  |                    |                      |
| OSBPL3             | 0.558413044804901  | 2 0.756383676909357  |
| 0.306162332815372  |                    |                      |
| CYCS               | 46.1989981251107 2 | 9.28997989646518e-11 |



|                                |  |                                    |
|--------------------------------|--|------------------------------------|
| 0.376308266084574              |  |                                    |
| C7orf31 4.11836968323314 2     |  | 0.127557907423901                  |
| 1.42093645088877               |  |                                    |
| NFE2L3 2.6194335430066 2       |  | 0.269896487936923                  |
| 1.52896477044717               |  |                                    |
| HNRNPA2B1 7.23854466772738 2   |  | 0.0268021724317686                 |
| 0.112303276780549              |  |                                    |
| CBX3 20.3340051762121 2        |  | 3.84173034915225e-05               |
| 0.335602892863804              |  |                                    |
| SNX10 18.9016264868897 2       |  | 7.86255975128158e-05               |
| 0.63483609933562               |  |                                    |
| AC004540.1 7.99453996441589 2  |  | 0.0183657092241286                 |
| 1.28669553769038               |  |                                    |
| SKAP2 8.46782291037736 2       |  | 0.0144955807019124                 |
| 0.332683643981721              |  |                                    |
| HOXA1 0.00185673669347997 2    |  | 0.999072062453829                  |
| 0.0442082379044926             |  |                                    |
| HOTAIRM1 0.00112408759439114 2 |  | 0.999438114119833                  |
| 0.011110442167711              |  |                                    |
| HOXA-AS2 0.97899615408248 2    |  | 0.612933962618172                  |
| 1.15945927779904               |  |                                    |
| HOXA7 2.58919030681189 2       |  | 0.274008773398003                  |
| 0.765141382958177              |  |                                    |
| HIBADH 4.66978305785781 2      |  | 0.0968209842327487                 |
| 0.715932551180421              |  |                                    |
| TAX1BP1 1.29804231568898 2     |  | 0.522557027350411                  |
| 0.106394163755753              |  |                                    |
| JAZF1 3.9769459861565 2        |  | 0.13690431975729 0.576910518712389 |
| CHN2 0.279596608595813 2       |  | 0.869533598902903                  |
| 0.571276242874646              |  |                                    |
| PRR15 8.62685385503811 2       |  | 0.0133875925841095                 |
| 4.77585756614532               |  |                                    |
| SCRN1 2.22989912319142 2       |  | 0.327931818840118                  |
| 0.355010248513617              |  |                                    |
| FKBP14 2.40847576379149 2      |  | 0.299920487268044                  |
| 1.28288352382229               |  |                                    |
| PLEKHA8 0.0586628101697403 2   |  | 0.971094585449871                  |
| 0.122034790074593              |  |                                    |
| MTURN 4.45608474033427 2       |  | 0.107739137174411                  |
| 1.67100379451184               |  |                                    |
| ZNRF2 0.00194871786244102 2    |  | 0.999026115602308                  |
| 0.0369856375376865             |  |                                    |
| GGCT 15.1292169210667 2        |  | 0.000518480333544291               |
| 0.812192443016258              |  |                                    |
| GARS 3.47368008361159 2        |  | 0.176075914984015                  |
| 0.272095158679294              |  |                                    |
| LSM5 2.02923748304666 2        |  | 0.362540625173228                  |
| 0.165442407444792              |  |                                    |
| AVL9 0.100487974436221 2       |  | 0.950997364990574                  |
| 0.149491618606987              |  |                                    |

|            |                    |   |                      |
|------------|--------------------|---|----------------------|
| KBTBD2     | 0.133759440408062  | 2 | 0.935307693189898    |
|            | 0.188742899232228  |   |                      |
| NT5C3A     | 9.99771665119066   | 2 | 0.00674564393357491  |
|            | 0.565560447002995  |   |                      |
| RP9        | 5.01635277893914   | 2 | 0.081416576070955    |
|            | 0.75379384028336   |   |                      |
| BBS9       | 0.883639571417145  | 2 | 0.642865478563628    |
|            | 0.37299712343103   |   |                      |
| HERPUD2    | 0.210614659622161  | 2 | 0.900047868535024    |
|            | 0.143523487756778  |   |                      |
| AC018647.2 | 3.212615829961     | 2 | 0.200626980202067    |
|            | 5.43873773531286   |   |                      |
| SEPT7      | 8.11114694018531   | 2 | 0.0173255416540362   |
|            | 0.122152802226368  |   |                      |
| EEPDI      | 3.69081363001297   | 2 | 0.157961046892405    |
|            | 0.332485721426844  |   |                      |
| ELM01      | 0.0585248503921575 | 2 | 0.971161573756778    |
|            | 0.0511606899318349 |   |                      |
| STARD3NL   | 0.0809881093173809 | 2 | 0.960314873894131    |
|            | 0.0767055667671385 |   |                      |
| TRG-AS1    | 0.477940452349868  | 2 | 0.787438327074668    |
|            | 0.353501255146615  |   |                      |
| VPS41      | 0.644087913122521  | 2 | 0.724666335789618    |
|            | 0.0885786024802366 |   |                      |
| YAE1D1     | 1.64661999620734   | 2 | 0.438976236608835    |
|            | 0.626592452199805  |   |                      |
| RALA       | 10.4345500266754   | 2 | 0.00542208412063994  |
|            | 0.456597561201393  |   |                      |
| CDK13      | 60.8041452528418   | 2 | 6.26165785888588e-14 |
|            | 1.03418783399405   |   |                      |
| MPLKIP     | 17.8135166498639   | 2 | 0.000135470273573746 |
|            | 0.493263929690529  |   |                      |
| SUGCT      | 241.663424882503   | 2 | 0                    |
| LINC01450  | 1.07529270605171   | 2 | 1.82187902831963     |
|            | 0.924749108685663  |   | 0.584121451413841    |
| PSMA2      | 4.62016754484343   | 2 | 0.0992529365525092   |
|            | 0.129508588803093  |   |                      |
| MRPL32     | 4.70887494459791   | 2 | 0.0949469017774419   |
|            | 0.307286438250144  |   |                      |
| STK17A     | 76.3765606376049   | 2 | 0                    |
| COA1       | 12.6957499567304   | 2 | 0.656132829140978    |
|            | 0.636728825857273  |   | 0.00175046295841907  |
| BLVRA      | 5.80076877631381   | 2 | 0.0550020738466993   |
|            | 1.94902685422692   |   |                      |
| MRPS24     | 7.85956315093481   | 2 | 0.019647963681688    |
|            | 0.805372497075291  |   |                      |
| URGCP      | 1.74539572301353   | 2 | 0.417822799279899    |
|            | 0.643649417192878  |   |                      |
| UBE2D4     | 5.21354849268361   | 2 | 0.0737721310796646   |
|            | 0.766979743311579  |   |                      |

|                    |                    |   |                      |
|--------------------|--------------------|---|----------------------|
| AC004951.1         | 5.76106971463786   | 2 | 0.0561047467732561   |
| 0.633272660498651  |                    |   |                      |
| LINC00957          | 2.78120254150505   | 2 | 0.248925587950459    |
| 1.61420444989386   |                    |   |                      |
| DBNL               | 0.309957074537031  | 2 | 0.856433558689862    |
| 0.0425664010641468 |                    |   |                      |
| POLM               | 8.1186752751829    | 2 | 0.0172604480018071   |
| 0.414623997972819  |                    |   |                      |
| AEBP1              | 6.17303268744815   | 2 | 0.0456607439972433   |
| 0.860774983641878  |                    |   |                      |
| POLD2              | 1.45212528596607   | 2 | 0.483810178205916    |
| 0.116929688283101  |                    |   |                      |
| YKT6               | 0.0440745540170431 | 2 | 0.978203769861293    |
| 0.0292722099787434 |                    |   |                      |
| CAMK2B             | 65.8064299147122   | 2 | 5.10702591327572e-15 |
| 1.90576605083971   |                    |   |                      |
| NUDCD3             | 10.3524481622015   | 2 | 0.00564929748156406  |
| 0.731355708200687  |                    |   |                      |
| DDX56              | 1.33220027385447   | 2 | 0.513708067506957    |
| 0.206477335649786  |                    |   |                      |
| TMED4              | 7.3203701381303    | 2 | 0.025727750874935    |
| 0.501399565010161  |                    |   |                      |
| OGDH               | 2.28788645491311   | 2 | 0.318560385843195    |
| 0.586732626134444  |                    |   |                      |
| ZMIZ2              | 0.643364886795561  | 2 | 0.724928359568805    |
| 0.321642234149005  |                    |   |                      |
| PPIA               | 34.079668629192    | 2 | 3.97826752651653e-08 |
| 0.290429726621173  |                    |   |                      |
| H2AFV              | 23.1786949427498   | 2 | 9.26425166702938e-06 |
| 0.422247282804275  |                    |   |                      |
| PURB               | 0.423587639973375  | 2 | 0.80913150711442     |
| 0.282543012322601  |                    |   |                      |
| MYO1G              | 3.03098090056231   | 2 | 0.219700406293875    |
| 0.299846401673325  |                    |   |                      |
| SNHG15             | 6.26195327676966   | 2 | 0.043675121616578    |
| 0.492244441492729  |                    |   |                      |
| CCM2               | 2.1447570640083    | 2 | 0.342193630184194    |
| 0.126872734425769  |                    |   |                      |
| TBRG4              | 3.79425837777458   | 2 | 0.149998619406142    |
| 0.488361845708773  |                    |   |                      |
| TNS3               | 0.0573907658134025 | 2 | 0.971712419600601    |
| 0.135753568761567  |                    |   |                      |
| HUS1               | 2.41214118057486   | 2 | 0.299371323856098    |
| 0.213012446494795  |                    |   |                      |
| UPP1               | 2.91623063973233   | 2 | 0.232674378536188    |
| 1.07735858684858   |                    |   |                      |
| SPATA48            | 7.26595881154815   | 2 | 0.0264372995093767   |
| 1.16471611675822   |                    |   |                      |
| AC020743.1         | 2.26746008280701   | 2 | 0.321830573424209    |
| 0.687342130577407  |                    |   |                      |

|          |                    |   |                      |
|----------|--------------------|---|----------------------|
| IKZF1    | 5.81661579228523   | 2 | 0.0545679864937179   |
|          | 0.275431946608542  |   |                      |
| FIGNL1   | 0.246428816157439  | 2 | 0.884074089611562    |
|          | 0.104712914459704  |   |                      |
| SEC61G   | 56.4280050122655   | 2 | 5.58220136781529e-13 |
|          | 0.372682572556127  |   |                      |
| LANCL2   | 0.283982667569678  | 2 | 0.867628775510982    |
|          | 0.29313289434414   |   |                      |
| VOPP1    | 7.21664678849672   | 2 | 0.0270972401911203   |
|          | 0.230099162956744  |   |                      |
| NIPSNAP2 | 2.15033451379259   | 2 | 0.341240675671343    |
|          | 0.282064897209224  |   |                      |
| MRPS17   | 1.5172527508304    | 2 | 0.468309266520535    |
|          | 0.343625091158627  |   |                      |
| PSPH     | 3.97031892226873   | 2 | 0.137358708994942    |
|          | 0.729116268341468  |   |                      |
| CCT6A    | 0.711706597009872  | 2 | 0.700575388153812    |
|          | 0.0384263136982559 |   |                      |
| SUMF2    | 4.35452532456243   | 2 | 0.113351387383857    |
|          | 0.304080846151678  |   |                      |
| PHKG1    | 0.94839235444682   | 2 | 0.622385142801294    |
|          | 0.489493567399341  |   |                      |
| CHCHD2   | 3.01629739133823   | 2 | 0.221319328357478    |
|          | 0.0844598722780681 |   |                      |
| ZNF736   | 0.0289725037077196 | 2 | 0.985618169061863    |
|          | 0.136442125327726  |   |                      |
| ZNF680   | 0.34275066501642   | 2 | 0.842505294495079    |
|          | 0.169992303157527  |   |                      |
| ZNF107   | 0.485097401202211  | 2 | 0.784625534913047    |
|          | 0.282840603437501  |   |                      |
| ZNF138   | 1.99516755530532   | 2 | 0.36876939442783     |
|          | 0.0483874911372043 |   | 0.348087265932       |
| ZNF273   | 0.105344442938805  | 2 | 0.976096577050358    |
|          | 0.466602678865902  |   |                      |
| ZNF117   | 0.301664248424141  | 2 | 0.791914902377978    |
|          | 0.428861733155591  |   |                      |
| ERV3-1   | 0.119682703022244  | 2 | 0.807000600516678    |
|          | 3.20895297384394   |   |                      |
| ZNF92    | 0.392594551694759  | 2 | 0.200994750752765    |
|          | 0.132691959751855  |   |                      |
| VKORC1L1 | 0.129210830564495  | 2 | 0.935807037873282    |
|          | 4.05681561729029   |   |                      |
| GUSB     | 0.407701982099713  | 2 | 0.131544798990826    |
|          | 0.419114465494924  |   |                      |
| ASL      | 0.177587704012137  | 2 | 0.810943225596073    |
|          | 1.95327743313875   |   |                      |
| CRCP     | 0.387119849703581  | 2 | 0.376574748381662    |
|          | AC008267.5         |   |                      |
|          | 3.55028127325722   | 2 | 0.169459615594526    |
|          | 1.23442972999931   |   |                      |
| KCTD7    | 4.00105304092513   | 2 | 0.13526404519647     |
|          |                    |   | 0.901576269974099    |

|            |                     |   |                      |
|------------|---------------------|---|----------------------|
| RABGEF1    | 1.08009367751984    | 2 | 0.582720957807729    |
|            | 0.415977103705948   |   |                      |
| AC027644.3 | 9.06417883224954    | 2 | 0.0107581742703214   |
|            | 0.710785154543012   |   |                      |
| TMEM248    | 4.66194280354163    | 2 | 0.0972012797188311   |
|            | 0.362202446192021   |   |                      |
| SBDS       | 0.571170321475896   | 2 | 0.75157433382803     |
|            | 0.0750152328219122  |   |                      |
| TYW1       | 1.06735076079796    | 2 | 0.586445593205851    |
|            | 0.38714276592036    |   |                      |
| AC006480.2 | 2.44375203566524    | 2 | 0.29467682906427     |
|            | 1.33767265330457    |   |                      |
| AUTS2      | 0.718977238121308   | 2 | 0.698033195686399    |
|            | 0.441502083987814   |   |                      |
| TYW1B      | 2.69029159344934    | 2 | 0.260501724792894    |
|            | 1.67885682621692    |   |                      |
| POM121     | 0.211643645676244   | 2 | 0.899584919284952    |
|            | 0.183160429882304   |   |                      |
| NSUN5      | 5.83988567717211    | 2 | 0.0539367703142952   |
|            | 0.254176253780088   |   |                      |
| BAZ1B      | 2.08764836406862    | 2 | 0.352105588148384    |
|            | 0.169969491301984   |   |                      |
| BCL7B      | 0.362136710791887   | 2 | 0.834378322485845    |
|            | 0.0940894219837075  |   |                      |
| TBL2       | 1.47776543569684    | 2 | 0.477647284289335    |
|            | 0.334201800660414   |   |                      |
| DNAJC30    | 0.230356354659289   | 2 | 0.891207336815907    |
|            | 0.106804200018892   |   |                      |
| BUD23      | 14.2172919134539    | 2 | 0.00081800185247316  |
|            | 0.538430127959383   |   |                      |
| STX1A      | 0.0631232481034728  | 2 | 0.968931245144752    |
|            | 0.262946772318127   |   |                      |
| ABHD11     | 0.346559524304917   | 2 | 0.840902329288512    |
|            | 0.217219247459272   |   |                      |
| LIMK1      | 20.3552819947042    | 2 | 3.80107707598221e-05 |
|            | 0.491118405123562   |   |                      |
| EIF4H      | 0.441688675182227   | 2 | 0.80184148715351     |
|            | 0.0661242562470181  |   |                      |
| LAT2       | 3.99723265122508    | 2 | 0.13552267281493     |
|            | 0.179069153140919   |   |                      |
| RFC2       | 2.67705860681463    | 2 | 0.262231047431134    |
|            | 0.315522278653362   |   |                      |
| CLIP2      | 2.002680119319      | 2 | 0.367386790936846    |
|            | 0.757761380532794   |   |                      |
| GTF2I      | 0.389881967041678   | 2 | 0.822883220293441    |
|            | 0.0720082663145466  |   |                      |
| NCF1       | 6.81466978083119    | 2 | 0.0331293762426714   |
|            | 0.192839257215306   |   |                      |
| GTF2IRD2   | 1.42814160822725    | 2 | 0.489646878345144    |
|            | 0.239333359368704   |   |                      |
| RCC1L      | 0.00522813297095802 | 2 | 0.997389347211125    |

|                     |                      |   |                     |
|---------------------|----------------------|---|---------------------|
| 0.0148546449876014  |                      |   |                     |
| GTF2IRD2B           | 2.50287477710175     | 2 | 0.286093273975408   |
| 0.378995559091456   |                      |   |                     |
| TRIM73              | 2.50510009304491     | 2 | 0.285775127040687   |
| 1.01241088362415    |                      |   |                     |
| POM121C             | 3.68134489337822e-05 | 2 | 0.999981593444936   |
| 0.00221265198703944 |                      |   |                     |
| HIP1                | 7.5104666128238      | 2 | 0.0233949917708584  |
| 0.74291236779219    |                      |   |                     |
| RHBDD2              | 2.83126374063297     | 2 | 0.24277216444953    |
| POR                 | 0.774723244926933    | 2 | 0.456307574941964   |
| 0.22189014438176    |                      |   | 0.678845564729264   |
| TMEM120A            | 1.6935097013907      | 2 | 0.428804210206417   |
| 0.454328785681341   |                      |   |                     |
| STYXL1              | 0.501148507561659    | 2 | 0.778353682164193   |
| 0.179983629527119   |                      |   |                     |
| MDH2                | 0.416808169146204    | 2 | 0.811878902679654   |
| 0.058447787262892   |                      |   |                     |
| HSPB1               | 13.5417645680788     | 2 | 0.00114668250479466 |
| 0.929950963072934   |                      |   |                     |
| YWHAG               | 2.67991179978244     | 2 | 0.261857216257419   |
| 0.299454844636468   |                      |   |                     |
| DTX2                | 0.0767196348937177   | 2 | 0.962366602291822   |
| 0.110714096141992   |                      |   |                     |
| CCDC146             | 3.00791010610305     | 2 | 0.222249411379788   |
| 12.8944350366278    |                      |   |                     |
| GSAP                | 3.38149732386213     | 2 | 0.184381432948041   |
| 0.917692150218111   |                      |   |                     |
| PTPN12              | 1.48001780439757     | 2 | 0.477109668177021   |
| 0.43531203411731    |                      |   |                     |
| APTR                | 1.20594233526633     | 2 | 0.547183444736674   |
| 0.384971981109436   |                      |   |                     |
| RSBN1L              | 5.19231958479009     | 2 | 0.0745593525394105  |
| 0.328008521921075   |                      |   |                     |
| TMEM60              | 6.89605098168607     | 2 | 0.0318083803516804  |
| 0.343915446997373   |                      |   |                     |
| PHTF2               | 7.66683808269656     | 2 | 0.0216355163028704  |
| 0.793074278462344   |                      |   |                     |
| KIAA1324L           | 0.345628826308823    | 2 | 0.841293733407596   |
| 0.477864464527946   |                      |   |                     |
| AC005076.1          | 1.52978523690807     | 2 | 0.465383901934143   |
| 1.10850636706336    |                      |   |                     |
| DMTF1               | 1.46402730982644     | 2 | 0.480939568052875   |
| 0.122631838072815   |                      |   |                     |
| TMEM243             | 0.384646342548686    | 2 | 0.825040196112015   |
| 0.0571539337926966  |                      |   |                     |
| TP53TG1             | 8.64755241529098     | 2 | 0.0132497551277463  |
| 0.694739378310446   |                      |   |                     |
| CROT                | 0.462722347640395    | 2 | 0.7934528398841     |
| 0.372653260082846   |                      |   |                     |

|            |                    |   |                      |
|------------|--------------------|---|----------------------|
| ABCB4      | 2.79870362886855   | 2 | 0.246756856348562    |
|            | 0.927808862625621  |   |                      |
| SLC25A40   | 2.19986875017933   | 2 | 0.332892929049892    |
|            | 0.596933897430141  |   |                      |
| DBF4       | 0.435887898147346  | 2 | 0.804170514905635    |
|            | 0.14615200123013   |   |                      |
| SRI        | 16.8392989221175   | 2 | 0.000220491930292721 |
|            | 0.664497947516075  |   |                      |
| STEAP4     | 0.405476169802352  | 2 | 0.816492065022473    |
|            | 0.431506191233017  |   |                      |
| GTPBP10    | 2.20486732731949   | 2 | 0.332061972390042    |
|            | 0.636274021408749  |   |                      |
| CLDN12     | 1.82539343018347   | 2 | 0.401440193201996    |
|            | 1.33488039592381   |   |                      |
| CDK14      | 4.08150683961648   | 2 | 0.129930781567584    |
|            | 0.595878889331457  |   |                      |
| MTERF1     | 0.0123554768211073 | 2 | 0.993841304580995    |
|            | 0.0412148539131291 |   |                      |
| AKAP9      | 0.245426034829287  | 2 | 0.88451746724986     |
|            | 0.0655269758090758 |   |                      |
| CYP51A1    | 0.261601812035123  | 2 | 0.877392440558127    |
|            | 0.175470205750841  |   |                      |
| KRIT1      | 0.656735272464119  | 2 | 0.720098236833893    |
|            | 0.213632454258361  |   |                      |
| ANKIB1     | 2.07440729881704   | 2 | 0.354444448389746    |
|            | 0.442972640505025  |   |                      |
| GATAD1     | 0.0386714705103092 | 2 | 0.98085000103145     |
|            | 0.0805858954141716 |   |                      |
| PEX1       | 3.46350369080748   | 2 | 0.176974106971917    |
|            | 1.2935352337108    |   |                      |
| RBM48      | 2.32914954077978   | 2 | 0.312055328989568    |
|            | 0.488898452306821  |   |                      |
| FAM133B    | 0.68406993759807   | 2 | 0.71032336511987     |
|            | 0.124141169314219  |   | 0.101725067524888    |
| CDK6       | 0.113717818124347  | 2 | 0.939816547821086    |
|            | 0.113717818124347  |   |                      |
| SAMD9      | 0.114633638296753  | 2 | 0.944294851279418    |
|            | 0.102944990758     |   |                      |
| SAMD9L     | 8.13138215847155   | 2 | 0.0171511323855883   |
|            | 1.05338429964831   |   |                      |
| VPS50      | 2.22508689085175   | 2 | 0.328721810917257    |
|            | 0.494657973752798  |   |                      |
| GNG11      | 1.52277749736367   | 2 | 0.467017406643259    |
|            | 0.492323861101832  |   |                      |
| BET1       | 8.68675368485965   | 2 | 0.0129925801464563   |
|            | 0.33283876444986   |   |                      |
| AC003092.1 | 3.62191104581112   | 2 | 0.163497836212689    |
|            | 2.95401820424686   |   |                      |
| CASD1      | 4.82441800647815   | 2 | 0.0896171112699867   |
|            | 1.05772698398104   |   |                      |
| SGCE       | 29.3854759473204   | 2 | 4.15934528041895e-07 |

|                             |   |                                    |
|-----------------------------|---|------------------------------------|
| 2.24299035892966            |   |                                    |
| PEG10 45.6958361531516 2    |   | 1.19474541371289e-10               |
| 2.05791697403238            |   |                                    |
| SLC25A13 0.10254913221583 2 |   | 0.95001779203226 0.125114345012442 |
| SEM1 12.273933733637 2      |   | 0.00216146971119513                |
| 0.255987034472845           |   |                                    |
| SDHAF3 4.46796612954963 2   |   | 0.107100989260881                  |
| 0.587458116637394           |   |                                    |
| ASNS 8.1475837684905 2      |   | 0.0170127556446633                 |
| 0.544798209914651           |   |                                    |
| TECPR1 0.22878802700407 2   |   | 0.891906463451422                  |
| 0.307853204497355           |   |                                    |
| BRI3 13.6578392593042 2     |   | 0.0010820264756799                 |
| 0.533674659172714           |   |                                    |
| BAIAP2L1 21.33332904405 2   |   | 2.33091511326888e-05               |
| 0.609161575448726           |   |                                    |
| NPTX2 3.77752359946242 2    |   | 0.1512589818456 0.521242932897682  |
| TRRAP 1.84099813491147 2    |   | 0.398320202821599                  |
| 0.486893349388287           |   |                                    |
| SMURF1 2.48520830137277 2   |   | 0.288631598222182                  |
| 1.26820997818823            |   |                                    |
| ARPC1A 1.04519684132102 2   |   | 0.592977738796927                  |
| 0.155112033410978           |   |                                    |
| ARPC1B 11.1268326297109 2   |   | 0.00383565020000654                |
| 0.174133711453492           |   |                                    |
| PDAP1 2.78463636294964 2    |   | 0.248498571618808                  |
| 0.190914424379771           |   |                                    |
| BUD31 0.816827757398226     | 2 | 0.664703715175211                  |
| 0.0923684679747519          |   |                                    |
| PTCD1 0.00159932093649952   | 2 | 0.999200659174975                  |
| 0.0257479441845013          |   |                                    |
| CPSF4 1.8059207166525 2     |   | 0.405367847638114                  |
| 0.325493348550302           |   |                                    |
| ATP5MF 26.5736274109539 2   |   | 1.69671979111108e-06               |
| 0.323587823471795           |   |                                    |
| ZNF789 1.39126146671662 2   |   | 0.498759764333683                  |
| 0.527693236538523           |   |                                    |
| ZNF394 0.237552927282539    | 2 | 0.888006280267852                  |
| 0.119811210575861           |   |                                    |
| ZKSCAN5 0.627874030381586   | 2 | 0.730565041210082                  |
| 0.328039650354635           |   |                                    |
| FAM200A 1.02334121435379 2  |   | 0.599493224092228                  |
| 0.43027814847103            |   |                                    |
| ZNF655 3.07779303147597 2   |   | 0.214617798170023                  |
| 0.171821172562729           |   |                                    |
| TMEM225B 2.7948673481552 2  |   | 0.247230624865007                  |
| 2.76251891740576            |   |                                    |
| ZSCAN25 2.36218570757155 2  |   | 0.306943111297552                  |
| 1.82252400894981            |   |                                    |
| CYP3A5 0.34631461302206 2   |   | 0.841005308827708                  |



|                             |                      |                   |
|-----------------------------|----------------------|-------------------|
| 0.515942005384013           |                      |                   |
| TRIM4 1.10639687849616 2    | 0.57510741942121     | 0.156904428415317 |
| ZKSCAN1 0.00124841226726258 | 2                    | 0.999375988642488 |
| 0.00987625059129972         |                      |                   |
| ZSCAN21 2.25216271541184 2  | 0.324301591656289    |                   |
| 0.653316871442141           |                      |                   |
| ZNF3 1.35569744665649 2     | 0.507708038833407    |                   |
| 0.412887507527616           |                      |                   |
| COPS6 0.0431235438837078    | 2                    | 0.978669021316041 |
| 0.0208944267723831          |                      |                   |
| MCM7 2.25235380846739 2     | 0.324270607245504    |                   |
| 0.34359000507816            |                      |                   |
| AP4M1 0.333975724054736     | 2                    | 0.846209882547247 |
| 0.223186857423267           |                      |                   |
| TAF6 0.196952894291839      | 2                    | 0.90621703636054  |
| 0.101137071645422           |                      |                   |
| CNPY4 0.926773086004265     | 2                    | 0.62914939220492  |
| 0.528712164762552           |                      |                   |
| MBLAC1 1.67415430386051 2   | 0.432974193557438    |                   |
| 0.960248186896061           |                      |                   |
| LAMTOR4 0.881277559596614   | 2                    | 0.643625154996198 |
| 0.0511829513224925          |                      |                   |
| C7orf43 0.693069331720821   | 2                    | 0.707134305443253 |
| 0.229022359163261           |                      |                   |
| STAG3 28.1217048334252 2    | 7.82437009627657e-07 |                   |
| 0.725603530459957           |                      |                   |
| CASTOR3 1.51263073160325 2  | 0.469392785266475    |                   |
| 1.36896382938461            |                      |                   |
| PILRB 5.4896683352291 2     | 0.064258956276985    |                   |
| 0.661523726571149           |                      |                   |
| ZCWPW1 2.26896055935657 2   | 0.321589214359756    |                   |
| 0.487543871283513           |                      |                   |
| MEPCE 1.86830520934265 2    | 0.392918681953699    |                   |
| 0.473632368833757           |                      |                   |
| PPP1R35 1.75464607772252 2  | 0.415894756936468    |                   |
| 0.230128860667487           |                      |                   |
| TSC22D4 0.864863284289368   | 2                    | 0.648929211027449 |
| 0.129319889748579           |                      |                   |
| AGFG2 1.16367423758252 2    | 0.558870711006686    |                   |
| 0.653530393662942           |                      |                   |
| SAP25 0.446077585297514     | 2                    | 0.800083811322267 |
| 0.274434672772722           |                      |                   |
| LRCH4 4.2097571966822 2     | 0.121860467434006    |                   |
| 0.179683813216867           |                      |                   |
| MOSPD3 0.279818877481837    | 2                    | 0.869436969140256 |
| 0.190520599660774           |                      |                   |
| GNB2 1.14595438170853 2     | 0.563844265364305    |                   |
| 0.102709003832499           |                      |                   |
| GIGYF1 0.310043096952099    | 2                    | 0.856396723240504 |
| 0.165061322800743           |                      |                   |

|           |                     |   |                      |
|-----------|---------------------|---|----------------------|
| POP7      | 0.110427842372586   | 2 | 0.946282696382937    |
|           | 0.0724098293085632  |   |                      |
| SLC12A9   | 0.354607649591744   | 2 | 0.837525284914579    |
|           | 0.196850930089071   |   |                      |
| TRIP6     | 0.780221458989562   | 2 | 0.676981908483065    |
|           | 0.339912042453832   |   |                      |
| SRRT      | 0.741381168505209   | 2 | 0.690257485055859    |
|           | 0.144632555540677   |   |                      |
| TRIM56    | 0.303637055770683   | 2 | 0.859144177305908    |
|           | 0.121048522588563   |   |                      |
| AP1S1     | 1.103180578955      | 2 | 0.576033022340394    |
|           | 0.170959610710121   |   |                      |
| PL0D3     | 0.297242446330071   | 2 | 0.861895519134682    |
|           | 0.282079544551079   |   |                      |
| ZNHIT1    | 5.07735641254994    | 2 | 0.0789707138286668   |
|           | 0.17433232968863    |   |                      |
| CLDN15    | 2.92303591500732    | 2 | 0.231884017357411    |
|           | 0.415829164120982   |   |                      |
| FIS1      | 1.89332960734383    | 2 | 0.388033034052705    |
|           | 0.163282110299938   |   |                      |
| IFT22     | 0.169385691894595   | 2 | 0.918794452504388    |
|           | 0.131983011730462   |   |                      |
| CUX1      | 0.0620751002799706  | 2 | 0.969439169816023    |
|           | 0.0407280411073088  |   |                      |
| SH2B2     | 5.93261842449034    | 2 | 0.0514930098164025   |
|           | 0.199286833486253   |   |                      |
| PRKRIP1   | 0.459552527654061   | 2 | 0.794711388298669    |
|           | 0.144009535623684   |   |                      |
| ORAI2     | 136.002426802678    | 2 | 1.07573067352261     |
| ALKBH4    | 2.58678196736645    | 2 | 0.274338925206201    |
|           | 0.440308446028238   |   |                      |
| LRWD1     | 8.31255901971982    | 2 | 0.0156657338396967   |
|           | 0.625892242060703   |   |                      |
| POLR2J    | 17.4296403131873    | 2 | 0.000164135187349368 |
|           | 0.423900796470387   |   |                      |
| POLR2J3   | 2.54601891797052    | 2 | 0.279987740980106    |
|           | 1.0863400855583     |   |                      |
| POLR2J3.1 | 0.098689131351122   | 2 | 0.951853097281895    |
|           | 0.032972366827056   |   |                      |
| RASA4     | 0.00046043242095971 | 2 | 0.999769810287238    |
|           | 0.0123469299531877  |   |                      |
| UPK3BL1   | 0.0213902044718123  | 2 | 0.989361887020425    |
|           | 0.072476937150014   |   |                      |
| POLR2J2   | 0.078874980153681   | 2 | 0.961330044779673    |
|           | 0.101035148026204   |   |                      |
| FAM185A   | 0.0393421826405644  | 2 | 0.980521122183464    |
|           | 0.0974930773222887  |   |                      |
| ARMC10    | 3.68656154105292    | 2 | 0.158297236354451    |
|           | 0.370727483424439   |   |                      |
| NAPEPLD   | 0.15045312503246    | 2 | 0.927533318238879    |

|                    |                     |                      |
|--------------------|---------------------|----------------------|
| 0.0804371315228883 |                     |                      |
| PMPCB              | 1.5595911583584 2   | 0.458499728616873    |
| 0.150299189931571  |                     |                      |
| DNAJC2             | 1.76744808944526 2  | 0.413241114211531    |
| 0.244269731927811  |                     |                      |
| PSMC2              | 0.163746035248085 2 | 0.921388951426417    |
| 0.0162925583630993 |                     |                      |
| ORC5               | 5.3129670078305 2   | 0.0701946273808676   |
| 0.768167407064175  |                     |                      |
| AC007384.1         | 5.06325058529821 2  | 0.0795296562215011   |
| 0.864993591595809  |                     |                      |
| KMT2E-AS1          | 0.18191138624896 2  | 0.913058164757516    |
| 0.161516299422016  |                     |                      |
| KMT2E              | 0.48903199419627 2  | 0.783083461202189    |
| 0.070686563523714  |                     |                      |
| AC005070.3         | 1.69577738832889 2  | 0.428318288884569    |
| 0.468501490523799  |                     |                      |
| SRPK2              | 0.504783009545659 2 | 0.77694050260304     |
| 0.159886194043588  |                     |                      |
| PUS7               | 1.4690501480368 2   | 0.479733242661595    |
| 0.889517307549328  |                     |                      |
| RINT1              | 0.952529764032588 2 | 0.621098942516404    |
| 0.340805550206189  |                     |                      |
| ATXN7L1            | 2.20270918522024 2  | 0.332420484246224    |
| 1.26819512009008   |                     |                      |
| SYPL1              | 25.6929788425673 2  | 2.63536353573013e-06 |
| 0.280873881349091  |                     |                      |
| NAMPT              | 1.34321239015042 2  | 0.510887333704616    |
| 0.220936080575284  |                     |                      |
| CCDC71L            | 2.14712082259968 2  | 0.341789437518083    |
| 0.531547412408473  |                     |                      |
| PIK3CG             | 13.0970637895452 2  | 0.0014322167004357   |
| 1.35208557731091   |                     |                      |
| PRKAR2B            | 7.48682883583321 2  | 0.0236731350041548   |
| 0.629650713311972  |                     |                      |
| HBP1               | 0.214141663796071 2 | 0.898462030965423    |
| 0.109134830754257  |                     |                      |
| COG5               | 0.512585456778173 2 | 0.773915388625641    |
| 0.292230354269764  |                     |                      |
| DUS4L              | 1.35635362806966 2  | 0.507541491866958    |
| 0.699537771814942  |                     |                      |
| BCAP29             | 1.62224084296112 2  | 0.444359916810508    |
| 0.516975512999121  |                     |                      |
| AC002467.1         | 1.27100312196185 2  | 0.529669759999271    |
| 0.715143688991243  |                     |                      |
| CBLL1              | 1.57404907876071 2  | 0.455197203619243    |
| 0.408447837976681  |                     |                      |
| DLD                | 2.24772158944486 2  | 0.325022523907706    |
| 0.163579391832452  |                     |                      |
| LAMB1              | 2.87646738874873 2  | 0.237346615320672    |

|                              |   |                                    |
|------------------------------|---|------------------------------------|
| 1.45601575510464             |   |                                    |
| PNPLA8 5.03082953612987 2    |   | 0.0808293798076475                 |
| 0.34666214006987             |   |                                    |
| THAP5 1.39599900375381 2     |   | 0.497579716087932                  |
| 0.462637087166817            |   |                                    |
| DNAJB9 1.90107321991984 2    |   | 0.386533550040535                  |
| 0.305190174369147            |   |                                    |
| IMMP2L 1.36245300085141 2    |   | 0.50599600730585 0.644039588142656 |
| ZNF277 3.75012622745193 2    |   | 0.153345288347002                  |
| 0.472467785190007            |   |                                    |
| IFRD1 0.83242133566411 2     |   | 0.659541311709543                  |
| 0.180182548863274            |   |                                    |
| TMEM168 1.78983426904102 2   |   | 0.408641459508362                  |
| 0.472860007388069            |   |                                    |
| BMT2 0.0243836862464672      | 2 | 0.987882176279783                  |
| 0.149775188473854            |   |                                    |
| SMIM30 0.766535377378549     | 2 | 0.681630410110884                  |
| 0.133206481135045            |   |                                    |
| MDFIC 46.1929638505173 2     |   | 9.31805743675795e-11               |
| 1.00645566611377             |   |                                    |
| LINC01393 0.91393848963682 2 |   | 0.633199813938557                  |
| 0.872111812625847            |   |                                    |
| TFEC 1.01930650351215 2      |   | 0.600703835703971                  |
| 0.591833316794579            |   |                                    |
| TES 2.29381900235767 2       |   | 0.317616848628362                  |
| 0.203836074677585            |   |                                    |
| MET 0.59543914835235 2       |   | 0.742509529402013                  |
| 0.563387103243955            |   |                                    |
| CAPZA2 0.0403914544640455    | 2 | 0.98000684050766                   |
| 0.0192574366283241           |   |                                    |
| ST7 1.66701623517269 2       |   | 0.434522254221843                  |
| 1.24383530758592             |   |                                    |
| LSM8 1.58249472200991 2      |   | 0.453279039906372                  |
| 0.104347877158538            |   |                                    |
| ANKRD7 2.86570781322387 2    |   | 0.238626930561443                  |
| 1.72627218039368             |   |                                    |
| ING3 1.61097513097048 2      |   | 0.446869995049757                  |
| 0.226996331173037            |   |                                    |
| FAM3C 21.1631823741504 2     |   | 2.53789317428144e-05               |
| 0.291222278988603            |   |                                    |
| NDUFA5 0.516826588414279     | 2 | 0.772275988948253                  |
| 0.0810430146227284           |   |                                    |
| WASL 0.0499280842338667      | 2 | 0.975344982738634                  |
| 0.130830873801797            |   |                                    |
| AC006333.2 0.662888847359906 | 2 | 0.717886052573094                  |
| 0.440169208649833            |   |                                    |
| POT1 0.0561703663126218      | 2 | 0.97230553921881                   |
| 0.108536773675834            |   |                                    |
| ZNF800 0.0357830523328505    | 2 | 0.982267576909212                  |
| 0.0445739003745302           |   |                                    |

|            |                    |   |                     |
|------------|--------------------|---|---------------------|
| GCC1       | 0.548669946553689  | 2 | 0.760077426986707   |
|            | 0.52097833499153   |   |                     |
| ARF5       | 0.0558781328810954 | 2 | 0.972447619690832   |
|            | 0.0661937728507294 |   |                     |
| SND1       | 8.87105113793904   | 2 | 0.0118488368898979  |
|            | 0.242092018072554  |   |                     |
| SND1-IT1   | 6.42886081941894   | 2 | 0.0401782124269795  |
|            | 1.1808472307308    |   |                     |
| RBM28      | 2.80774708604857   | 2 | 0.245643607617529   |
|            | 0.340870540760729  |   |                     |
| IMPDH1     | 2.12077383142438   | 2 | 0.346321787062987   |
|            | 0.498861081177428  |   |                     |
| HILPDA     | 3.21172556237705   | 2 | 0.200716305930012   |
|            | 0.57835116782671   |   |                     |
| METTL2B    | 0.147586472743864  | 2 | 0.928863729222272   |
|            | 0.132475381939096  |   |                     |
| AC090114.2 | 0.661076694972146  | 2 | 0.718536806807188   |
|            | 0.283534662848387  |   |                     |
| CALU       | 9.30831392029715   | 2 | 0.00952193723176598 |
|            | 0.420077405079783  |   |                     |
| CCDC136    | 0.305810485542207  | 2 | 0.858211039658533   |
|            | 0.383342625269328  |   |                     |
| KCP        | 3.59027430937429   | 2 | 0.166104668750554   |
|            | 2.20525704176612   |   |                     |
| ATP6V1F    | 0.654325333556247  | 2 | 0.720966456196966   |
|            | 0.054603713155712  |   |                     |
| IRF5       | 2.25936988888073   | 2 | 0.32313504587946    |
|            | 0.410563051847113  |   |                     |
| TNP03      | 6.70403177361197   | 2 | 0.0350136992543304  |
|            | 0.51261232136171   |   |                     |
| TSPAN33    | 0.580672459918348  | 2 | 0.748012021240864   |
|            | 0.125052918373789  |   |                     |
| SMKR1      | 0.639562375352556  | 2 | 0.726307944816714   |
|            | 0.791304423561201  |   |                     |
| AC078846.1 | 3.3352711853104    | 2 | 0.188692684988612   |
|            | 3.22696409200213   |   |                     |
| NRF1       | 2.83894649446886   | 2 | 0.241841373963813   |
|            | 1.55136040015619   |   |                     |
| UBE2H      | 6.77786856928828   | 2 | 0.0337446199032737  |
|            | 0.269845079409811  |   |                     |
| ZC3HC1     | 0.0176843357146116 | 2 | 0.991196809143908   |
|            | 0.0324598687192015 |   |                     |
| KLHDC10    | 3.84651930091668   | 2 | 0.146129852706475   |
|            | 0.848227928855628  |   |                     |
| TMEM209    | 1.57417029122768   | 2 | 0.455169616667218   |
|            | 0.723888361910301  |   |                     |
| CEP41      | 1.92709626419835   | 2 | 0.381536738753321   |
|            | 0.574924578798579  |   |                     |
| MEST       | 1.23495374640679   | 2 | 0.539303453383854   |
|            | 0.616369206757182  |   |                     |
| COPG2      | 0.0402553122703525 | 2 | 0.980073552918779   |

0.0836782662067521  
 AC016831.7 0.00187380504440935 2 0.999063536233929  
 0.0228127574617096  
 LINC00513 0.813200156688821 2 0.665910449065914  
 0.280984296708666  
 AC016831.1 0.896794823049782 2 0.638650826393492  
 0.763163395625249  
 AC016831.5 1.05380178184034 2 0.590431950228058  
 0.250894949437862  
 AC058791.1 0.756153302434114 2 0.685177978926983  
 0.243085399176343  
 MKLN1 0.608868960791681 2 0.737540350003359  
 0.233489880863778  
 CHCHD3 1.24168663972851 2 0.537490969600745  
 0.163246503159573  
 EXOC4 1.88225133438348 2 0.390188365814707  
 0.424077198676256  
 SLC35B4 7.85365598754386 2 0.0197060813329372  
 0.975470133080033  
 AKR1B1 1.80631357522639 2 0.40528822934079 0.183143009078485  
 BPGM 3.20862621401286 2 0.201027591940888  
 0.401618474318878  
 AGBL3 0.0727232153559411 2 0.964291535207155  
 0.251319742932614  
 CYREN 7.83774348243359 2 0.0198634932670729  
 0.406779607673269  
 TMEM140 1.440817980964 2 0.48655321962495 0.487877231612402  
 WDR91 2.26714540307254 2 0.321881214187704  
 0.626395967104301  
 CNOT4 8.02855158065246 2 0.018056026165703  
 0.507933769734459  
 NUP205 2.42353878995328 2 0.297670117178271  
 0.863800952810588  
 STMP1 6.09036873264474 2 0.0475875376394028  
 0.276733630981327  
 MTPN 4.02588070275908 2 0.133595279527803  
 0.232124910865609  
 CREB3L2 36.3640194996775 2 1.2695607787272e-08  
 1.57135758999451  
 TRIM24 0.63702049692751 2 0.72723162491044 0.314907605282326  
 ZC3HAV1 0.60259437311627 2 0.739857864259215  
 0.171520336028325  
 TTC26 2.40993273624934 2 0.299702078886704  
 1.38174027649325  
 UBN2 3.16143262001125 2 0.205827609011428  
 0.893494168725193  
 FMC1 0.500404205345772 2 0.778643401255679  
 0.134701231636412  
 LUC7L2 0.0438220283529737 2 0.978327288437321  
 0.0274601423580697

|                    |                     |   |                      |
|--------------------|---------------------|---|----------------------|
| AC083880.1         | 1.74474476959769    | 2 | 0.41795881300255     |
| 2.41336815395001   |                     |   |                      |
| HIPK2              | 2.67115284387635    | 2 | 0.263006529020851    |
| 1.05467802207926   |                     |   |                      |
| PARP12             | 2.65969211380019    | 2 | 0.264517978883298    |
| 0.703345275710355  |                     |   |                      |
| KDM7A              | 0.518181535134639   | 2 | 0.771752969724833    |
| 0.289007210091525  |                     |   |                      |
| SLC37A3            | 0.164766059724657   | 2 | 0.920919151596983    |
| 0.331215679393191  |                     |   |                      |
| MKRN1              | 0.566775662625294   | 2 | 0.753227605953595    |
| 0.0923403842119061 |                     |   |                      |
| ADCK2              | 2.03471593129623    | 2 | 0.361548904039868    |
| 0.314782527402197  |                     |   |                      |
| NDUFB2             | 1.41238967035784    | 2 | 0.493518548511368    |
| 0.0514012423028537 |                     |   |                      |
| BRAF               | 0.347526352062024   | 2 | 0.840495923670998    |
| 0.138892661359518  |                     |   |                      |
| MRPS33             | 6.06169026042043    | 2 | 0.0482748223704049   |
| 0.342746666189994  |                     |   |                      |
| AGK                | 5.51214764389653    | 2 | 0.0635407515677964   |
| 0.93109477201292   |                     |   |                      |
| KIAA1147           | 0.00603460875731653 | 2 | 0.99698724310933     |
| 0.0692320258719436 |                     |   |                      |
| SSBP1              | 3.39296098714908    | 2 | 0.183327612661606    |
| 0.127957682802863  |                     |   |                      |
| TAS2R4             | 0.194851906995874   | 2 | 0.907169511798037    |
| 0.361254783428338  |                     |   |                      |
| TRBC2              | 9.41388185638245    | 2 | 0.00903236601967439  |
| 0.540565231421244  |                     |   |                      |
| PIP                | 28.3556440871639    | 2 | 6.96065519667499e-07 |
| 1.19945872387406   |                     |   |                      |
| GSTK1              | 8.1741146029708     | 2 | 0.016788564623937    |
| 0.29618205706897   |                     |   |                      |
| CASP2              | 0.291802706672076   | 2 | 0.864242953663968    |
| 0.150972503564001  |                     |   |                      |
| AC093673.1         | 1.02661475771086    | 2 | 0.598512793151242    |
| 1.0526301401624    |                     |   |                      |
| ZYX                | 1.84620226909076    | 2 | 0.397285094225741    |
| 0.313689282349543  |                     |   |                      |
| TCAF1              | 0.961052332186774   | 2 | 0.618457894606526    |
| 0.652858499858216  |                     |   |                      |
| OR2A25             | 3.91895122429819    | 2 | 0.140932304735868    |
| 1.61132713196917   |                     |   |                      |
| TPK1               | 0.0259227831621155  | 2 | 0.987122245513792    |
| 0.0986698167765668 |                     |   |                      |
| CNTNAP2            | 1.89181909665986    | 2 | 0.388326208771489    |
| 1.345335334451     |                     |   |                      |
| CUL1               | 0.169590799877825   | 2 | 0.918700231297273    |
| 0.0855908001462158 |                     |   |                      |

|            |                     |   |                      |                   |
|------------|---------------------|---|----------------------|-------------------|
| EZH2       | 2.23974592562593    | 2 | 0.32632124692327     | 0.276126825700553 |
| PDIA4      | 52.5681249915169    | 2 | 3.84570153499908e-12 |                   |
|            | 0.851736153725814   |   |                      |                   |
| ZNF786     | 1.71782774454151    | 2 | 0.423621940076244    |                   |
|            | 0.791670324717069   |   |                      |                   |
| ZNF425     | 2.43448347977816    | 2 | 0.296045612605637    |                   |
|            | 3.11692305485846    |   |                      |                   |
| ZNF398     | 0.548941215557184   | 2 | 0.759974341254757    |                   |
|            | 0.386737359808049   |   |                      |                   |
| ZNF282     | 2.22353941210836    | 2 | 0.328976254348456    |                   |
|            | 1.2320970846141     |   |                      |                   |
| ZNF212     | 0.638478521225522   | 2 | 0.72670165742058     |                   |
|            | 0.393297236985516   |   |                      |                   |
| ZNF783     | 2.21789402542281    | 2 | 0.32990616524075     | 1.50205774700759  |
| ZNF746     | 1.0957475513098     | 2 | 0.578177840184009    |                   |
|            | 0.451725040915041   |   |                      |                   |
| KRBA1      | 0.0217864918226627  | 2 | 0.989165870640149    |                   |
|            | 0.0918503397552806  |   |                      |                   |
| ATP6V0E2   | 0.00929432583457394 | 2 | 0.995363618436934    |                   |
|            | 0.0279031777464111  |   |                      |                   |
| ACTR3C     | 3.86409285258818    | 2 | 0.144851467116699    |                   |
|            | 2.56004250930408    |   |                      |                   |
| LRRRC61    | 1.55068622674203    | 2 | 0.460545734487114    |                   |
|            | 0.182882529702552   |   |                      |                   |
| RARRES2    | 2.60200823781627    | 2 | 0.272258276052327    |                   |
|            | 1.57921340829555    |   |                      |                   |
| REPIN1     | 10.5649412767672    | 2 | 0.00507986476716149  |                   |
|            | 0.221557856353212   |   |                      |                   |
| ZNF775     | 0.243373124353231   | 2 | 0.885425850965101    |                   |
|            | 0.0464685228161002  |   |                      |                   |
| AC073111.5 | 5.68070964961349    | 2 | 0.0584049387663456   |                   |
|            | 0.289338548029297   |   |                      |                   |
| GIMAP2     | 3.79199230358377    | 2 | 0.150168669724656    |                   |
|            | 1.10787944528034    |   |                      |                   |
| ABCB8      | 1.00246717765109    | 2 | 0.60578291157016     | 0.211296501961003 |
| CDK5       | 1.27641486117423    | 2 | 0.528238479996185    |                   |
|            | 0.368619189160875   |   |                      |                   |
| SLC4A2     | 3.02254953165065    | 2 | 0.220628548885196    |                   |
|            | 0.714172550963119   |   |                      |                   |
| FASTK      | 0.591940072729183   | 2 | 0.743809714929391    |                   |
|            | 0.153449444849395   |   |                      |                   |
| TMUB1      | 3.37475123244991    | 2 | 0.185004410023151    |                   |
|            | 0.313389394555783   |   |                      |                   |
| ABCF2.1    | 1.63089780024076    | 2 | 0.442440671105758    |                   |
|            | 0.281177193897186   |   |                      |                   |
| CHPF2      | 0.596847752734504   | 2 | 0.741986762428132    |                   |
|            | 0.274594988573387   |   |                      |                   |
| NUB1       | 0.0724833781136278  | 2 | 0.964407178652213    |                   |
|            | 0.0474142832786187  |   |                      |                   |
| RHEB       | 2.09796161162386    | 2 | 0.350294585443104    |                   |



|                    |                    |   |                    |
|--------------------|--------------------|---|--------------------|
| 0.243658370342343  |                    |   |                    |
| KMT2C              | 0.053271509886511  | 2 | 0.973715848122918  |
| 0.0525903424339539 |                    |   |                    |
| LINC01003          | 1.99131724653961   | 2 | 0.369480016252658  |
| 0.562428047148603  |                    |   |                    |
| XRCC2              | 0.657668938947183  | 2 | 0.719762149494245  |
| 0.728708071132324  |                    |   |                    |
| ACTR3B             | 1.44656367423318   | 2 | 0.485157432746202  |
| 0.608672859064414  |                    |   |                    |
| PAXIP1-AS2         | 1.62814748894656   | 2 | 0.443049514424353  |
| 0.73531143531421   |                    |   |                    |
| PAXIP1             | 0.0248176966477831 | 2 | 0.987667823968517  |
| 0.125530688403517  |                    |   |                    |
| PAXIP1-AS1         | 0.162501205372836  | 2 | 0.921962616183384  |
| 0.108057269576826  |                    |   |                    |
| AC144652.1         | 0.0204127637051136 | 2 | 0.989845526513733  |
| 0.0874682878090481 |                    |   |                    |
| INSIG1             | 8.51945022666369   | 2 | 0.0141261849764286 |
| 0.377500435031322  |                    |   |                    |
| AC009403.1         | 1.62704645717357   | 2 | 0.443293487369879  |
| 0.405092536050985  |                    |   |                    |
| RBM33              | 4.30733501450719   | 2 | 0.11605773371457   |
| 0.27338789795371   |                    |   |                    |
| LINC01006          | 0.642529714624746  | 2 | 0.725231142779306  |
| 0.352933812255409  |                    |   |                    |
| RNF32              | 2.27126690491818   | 2 | 0.321218580174857  |
| 2.35505936327376   |                    |   |                    |
| LMBR1              | 1.89975000892832   | 2 | 0.386789367377284  |
| 0.515201687287512  |                    |   |                    |
| NOM1               | 3.7414781794542    | 2 | 0.154009792684917  |
| 0.616596036673572  |                    |   |                    |
| UBE3C              | 1.47807035311413   | 2 | 0.477574468352037  |
| 0.611959238426956  |                    |   |                    |
| DNAJB6             | 1.49232528514958   | 2 | 0.474182674364917  |
| 0.138908651086023  |                    |   |                    |
| PTPRN2             | 1.75932282401763   | 2 | 0.414923375972845  |
| 0.500190644485119  |                    |   |                    |
| NCAPG2             | 3.87298424520057   | 2 | 0.144208930803317  |
| 2.6482998368072    |                    |   |                    |
| ESYT2              | 1.1601829389956    | 2 | 0.559847155285163  |
| 0.680413871871305  |                    |   |                    |
| WDR60              | 0.767039274144003  | 2 | 0.681458696063886  |
| 0.302087016283583  |                    |   |                    |
| PLCXD1             | 0.781077914797882  | 2 | 0.676692068002561  |
| 0.371358103801167  |                    |   |                    |
| GTPBP6             | 0.421578070037854  | 2 | 0.80994491887323   |
| 0.117819734297721  |                    |   |                    |
| LINC00685          | 5.52856712475347   | 2 | 0.0630212339610913 |
| 0.610262363546983  |                    |   |                    |
| PPP2R3B            | 3.49491059549064   | 2 | 0.174216709511117  |
| 1.00747448311254   |                    |   |                    |

|            |                      |   |                      |
|------------|----------------------|---|----------------------|
| SLC25A6    | 22.8721082720142     | 2 | 1.07990311519757e-05 |
|            | 0.225800064415845    |   |                      |
| ASMTL      | 4.96730938772094     | 2 | 0.0834377283292921   |
|            | 0.486153858569683    |   |                      |
| P2RY8      | 0.972676507941122    | 2 | 0.61487378863354     |
|            | 0.0535472483122765   |   |                      |
| AKAP17A    | 5.95661856826581e-05 | 2 | 0.999970217350671    |
|            | 0.000812982683034779 |   |                      |
| DHRX       | 2.57740556943467     | 2 | 0.275628100264991    |
|            | 0.489519881991197    |   |                      |
| ZBED1      | 0.011277835519295    | 2 | 0.994376951095369    |
|            | 0.0385683440209686   |   |                      |
| CD99       | 6.1318972639955      | 2 | 0.046609605522583    |
|            | 0.270560118133702    |   |                      |
| PRKX       | 0.00910882519316768  | 2 | 0.995455943013261    |
|            | 0.03601761704371     |   |                      |
| BX890604.1 | 1.0993751410522      | 2 | 0.577130094667807    |
|            | 0.474839409741402    |   |                      |
| PUDP       | 3.44282612207506     | 2 | 0.178813295204967    |
|            | 0.475099260640911    |   |                      |
| STS        | 4.16654377442021     | 2 | 0.124522122610744    |
|            | 0.962073014096423    |   |                      |
| PNPLA4     | 0.818409099967939    | 2 | 0.664178360753382    |
|            | 0.260877230493128    |   |                      |
| TBL1X      | 0.0371555606116129   | 2 | 0.981593722962554    |
|            | 0.0776634624921117   |   |                      |
| GPR143     | 7.02005657888694     | 2 | 0.0298960686818185   |
|            | 2.01189011337983     |   |                      |
| WVC3       | 2.87709703565881     | 2 | 0.237271904800125    |
|            | 0.52435135960749     |   |                      |
| CLCN4      | 0.271295210056964    | 2 | 0.873150272045468    |
|            | 0.562151660489635    |   |                      |
| HCCS       | 1.80231452723562     | 2 | 0.406099423611339    |
|            | 0.264832875718541    |   |                      |
| MSL3       | 7.92975442267275     | 2 | 0.0189703658152941   |
|            | 0.444172996639916    |   |                      |
| PRPS2      | 0.523646027619512    | 2 | 0.769647228584848    |
|            | 0.10619314793023     |   |                      |
| TMSB4X     | 144.102383684738     | 2 | 0.269397484058249    |
| TCEANC     | 0.674880971561368    | 2 | 0.713594442458924    |
|            | 0.380769449739658    |   |                      |
| RAB9A      | 40.7125789429729     | 2 | 1.44336376184384e-09 |
|            | 0.852198301139152    |   |                      |
| TRAPPC2    | 1.55485554320867     | 2 | 0.459586654054685    |
|            | 0.322053722603092    |   |                      |
| OFD1       | 5.32796240370114     | 2 | 0.0696702973584329   |
|            | 0.197290182163793    |   |                      |
| GPM6B      | 0.0180382221745457   | 2 | 0.991021439094694    |
|            | 0.0352359048651144   |   |                      |
| GEMIN8     | 0.00619045691634459  | 2 | 0.996909556822979    |

|                            |   |                                    |
|----------------------------|---|------------------------------------|
| 0.0254196092277633         |   |                                    |
| FANCB 6.43851076532237 2   |   | 0.0399848205691985                 |
| 2.11256924819217           |   |                                    |
| MOSPD2 1.67916675860281 2  |   | 0.431890420440749                  |
| 0.310628740778098          |   |                                    |
| PIGA 0.0265620926682604    | 2 | 0.986806757622438                  |
| 0.110133516291318          |   |                                    |
| VEGFD 3.86305986994319 2   |   | 0.144926300966369                  |
| 1.36949047201664           |   |                                    |
| CA5B 0.370612863229065     | 2 | 0.830849646241079                  |
| 0.523905205801026          |   |                                    |
| ZRSR2 4.06352847088194 2   |   | 0.131104018639936                  |
| 0.267560590353667          |   |                                    |
| AP1S2 1.42332467736178 2   |   | 0.490827597215425                  |
| 0.222037043049565          |   |                                    |
| CTPS2 2.74422105943175 2   |   | 0.253571224804569                  |
| 0.387801598619254          |   |                                    |
| SYAP1 2.81369302722636 2   |   | 0.244914400888906                  |
| 0.187128329424252          |   |                                    |
| TXLNG 5.33243819078502 2   |   | 0.0695145569801006                 |
| 0.425747066817504          |   |                                    |
| RBBP7 42.492033757375 2    |   | 5.92887294814659e-10               |
| 0.639261678333445          |   |                                    |
| PHKA2 1.36972193504755 2   |   | 0.50416031935995 0.90135876465238  |
| PDHA1 4.62679929952923 2   |   | 0.0989243710315107                 |
| 0.320337988731789          |   |                                    |
| SH3KBP1 8.35974723296941 2 |   | 0.0153004411680756                 |
| 0.260837319843803          |   |                                    |
| BCLAF3 2.93180636626042 2  |   | 0.23086937995505 1.24729770950883  |
| EIF1AX 1.09128182885669 2  |   | 0.57947027344049 0.118905961291688 |
| RPS6KA3 0.24310520868934 2 |   | 0.88554446863715 0.292829717493841 |
| CNKS2 1.01879230232862 2   |   | 0.600858296870785                  |
| 0.868142022445349          |   |                                    |
| KLHL34 0.762677359183392   | 2 | 0.682946550388337                  |
| 0.860630063772279          |   |                                    |
| MBTPS2 2.11123054027213 2  |   | 0.347978260795957                  |
| 1.01151812426929           |   |                                    |
| SMS 11.9428962996115 2     |   | 0.00255054517178399                |
| 0.507257797375897          |   |                                    |
| PRDX4 5.02634243402424 2   |   | 0.0810109282282361                 |
| 0.319024448943117          |   |                                    |
| ACOT9 0.47481645986615 2   |   | 0.788669263891321                  |
| 0.188025798572735          |   |                                    |
| SAT1 14.4756194438733 2    |   | 0.000718884594165248               |
| 0.375664856801182          |   |                                    |
| AP00 2.40488184968243 2    |   | 0.300459916023437                  |
| 0.7221536684568            |   |                                    |
| KLHL15 0.199236869656884   | 2 | 0.905182738357519                  |
| 0.444963158780308          |   |                                    |
| EIF2S3 1.42695666544658 2  |   | 0.489937066067401                  |

|                              |   |                                    |
|------------------------------|---|------------------------------------|
| 0.115409986247683            |   |                                    |
| ZFX 0.538372367252514        | 2 | 0.764000997929323                  |
| 0.180479283788063            |   |                                    |
| PDK3 0.0174128718713891      | 2 | 0.991331355322407                  |
| 0.0362181687702315           |   |                                    |
| POLA1 4.13474972036914 2     |   | 0.126517472201214                  |
| 2.6620301583624              |   |                                    |
| CXorf21 0.850964966235281    | 2 | 0.653454428328982                  |
| 0.283477731567506            |   |                                    |
| GK 0.392440973773035         | 2 | 0.821831011739258                  |
| 0.121523654171177            |   |                                    |
| TAB3 2.25857752377838 2      |   | 0.323263091709399                  |
| 1.02044323956543             |   |                                    |
| DMD 7.05163310230162 2       |   | 0.0294277682778161                 |
| 0.480561343175057            |   |                                    |
| CYBB 5.02425371219773 2      |   | 0.0810955770695009                 |
| 0.209552680323808            |   |                                    |
| DYNLT3 1.11387325509713 2    |   | 0.572961572882468                  |
| 0.258461461580975            |   |                                    |
| RPGR 1.67864633478812 2      |   | 0.432002818093786                  |
| 0.375747933453453            |   |                                    |
| MID1IP1 45.9778202485654 2   |   | 1.03763109216004e-10               |
| 1.21880893675287             |   |                                    |
| BCOR 0.518574491203816       | 2 | 0.771601352113407                  |
| 0.328387980022496            |   |                                    |
| ATP6AP2 0.000368219444189593 | 2 | 0.99981590722506                   |
| 0.00243998115171198          |   |                                    |
| CXorf38 0.498333742788404    | 2 | 0.779449894641162                  |
| 0.154761084074063            |   |                                    |
| MED14 1.78517240868318 2     |   | 0.409595085204373                  |
| 0.663625143845996            |   |                                    |
| MED140S 0.482498281221567    | 2 | 0.785645865712548                  |
| 0.154751491488617            |   |                                    |
| USP9X 0.127873671801489      | 2 | 0.938064249642842                  |
| 0.0304272854673341           |   |                                    |
| DDX3X 0.571831874178482      | 2 | 0.751325771923627                  |
| 0.131187343951656            |   |                                    |
| GPR82 7.48410997899248 2     |   | 0.023705338821111                  |
| 1.47116807463615             |   |                                    |
| FUNDC1 0.0288433801230995    | 2 | 0.985681804391574                  |
| 0.0342930139358541           |   |                                    |
| KDM6A 1.04808752652768 2     |   | 0.59212130187969 0.483258818577644 |
| KRBOX4 1.97091239011815 2    |   | 0.373268904659513                  |
| 0.305280580840123            |   |                                    |
| SLC9A7 8.67984680660397 2    |   | 0.0130375267966957                 |
| 0.869960919027881            |   |                                    |
| RP2 1.04891581033376 2       |   | 0.591876130408294                  |
| 0.356228413472063            |   |                                    |
| NDUFB11 2.23816017654144 2   |   | 0.326580081330597                  |
| 0.103203280232452            |   |                                    |

|           |                      |   |                      |
|-----------|----------------------|---|----------------------|
| RBM10     | 1.81054099959406     | 2 | 0.404432471404067    |
|           | 0.301034658814592    |   |                      |
| UBA1      | 1.41674744060816     | 2 | 0.492444398936256    |
|           | 0.0899426175499934   |   |                      |
| CDK16     | 1.57230416134175     | 2 | 0.455594517678925    |
|           | 0.325022995376952    |   |                      |
| USP11     | 0.0203331747274481   | 2 | 0.989884917694255    |
|           | 0.0232106135886701   |   |                      |
| LINC01560 | 0.30336830576038     | 2 | 0.859259632566136    |
|           | 0.37458137506358     |   |                      |
| ARAF      | 0.881871432240581    | 2 | 0.643434067681724    |
|           | 0.199900332498834    |   |                      |
| TIMP1     | 9.09081246818286     | 2 | 0.0106158593162224   |
|           | 1.56018049374381     |   |                      |
| ELK1      | 1.88534573256723     | 2 | 0.38958513351003     |
|           | 0.583727221913068    |   |                      |
| UXT       | 17.8875931703627     | 2 | 0.000130544474932548 |
|           | 0.354415578839448    |   |                      |
| ZNF81     | 0.422221073054327    | 2 | 0.809684562214995    |
|           | 0.643172634275477    |   |                      |
| ZNF182    | 2.32607317334994     | 2 | 0.312535696767007    |
|           | 1.68199804484418     |   |                      |
| FTSJ1     | 0.222579142539977    | 2 | 0.894679637896308    |
|           | 0.20042990955498     |   |                      |
| EBP       | 11.1461665331538     | 2 | 0.0037987497992602   |
|           | 0.606911826268563    |   |                      |
| TBC1D25   | 0.0298546786794663   | 2 | 0.985183521087578    |
|           | 0.0682176608728172   |   |                      |
| RBM3      | 31.2138449344617     | 2 | 1.66724603345436e-07 |
|           | 0.368381531908608    |   |                      |
| WDR13     | 0.440909739603295    | 2 | 0.802153839406636    |
|           | 0.148915146638101    |   |                      |
| WAS       | 11.5326787728347     | 2 | 0.00313119866894318  |
|           | 0.378336261020785    |   |                      |
| SUV39H1   | 0.000297902742203347 | 2 | 0.999851059721603    |
|           | 0.00998522340523755  |   |                      |
| HDAC6     | 1.6320229579582      | 2 | 0.442191833339953    |
|           | 0.347104214600205    |   |                      |
| TIMM17B   | 0.042540963171544    | 2 | 0.978954139687846    |
|           | 0.0298624994257512   |   |                      |
| PQBP1     | 0.0642313392812576   | 2 | 0.968394561749702    |
|           | 0.0329547728640867   |   |                      |
| SLC35A2   | 0.257727107564237    | 2 | 0.87909390640135     |
|           | 0.17315813529485     |   |                      |
| PIM2      | 39.3273417472282     | 2 | 2.88520218827415e-09 |
|           | 0.732658999422163    |   |                      |
| OTUD5     | 2.96505186620244     | 2 | 0.227063416403279    |
|           | 0.468755009061313    |   |                      |
| GRIPAP1   | 0.653127937040956    | 2 | 0.721398226795367    |
|           | 0.182441992405026    |   |                      |
| TFE3      | 1.71776198521835     | 2 | 0.423635868851256    |

|                             |   |                                    |
|-----------------------------|---|------------------------------------|
| 0.8449401121021             |   |                                    |
| PRAF2 0.0619854260140298    | 2 | 0.969482637663466                  |
| 0.0844353294244739          |   |                                    |
| WDR45 6.2120075921308 2     |   | 0.0447795464590884                 |
| 0.433451855683654           |   |                                    |
| GPKOW 0.313404183021061     | 2 | 0.854958720343823                  |
| 0.14337573370879            |   |                                    |
| PLP2 3.50286529658589 2     |   | 0.17352516475574 0.389226249822444 |
| PRICKLE3 0.532227964674089  | 2 | 0.766351771956653                  |
| 0.720691517000086           |   |                                    |
| CCDC22 0.241803604085289    | 2 | 0.886120970589936                  |
| 0.0379377464391546          |   |                                    |
| GSPT2 5.91511103719966 2    |   | 0.0519457424998546                 |
| 0.639226058461334           |   |                                    |
| MAGED1 2.40194416277496 2   |   | 0.300901568884249                  |
| 0.22427569256975            |   |                                    |
| TSPYL2 9.66536457000704 2   |   | 0.00796512784418724                |
| 0.510288170264621           |   |                                    |
| KANTR 2.41795705821275 2    |   | 0.298502034894303                  |
| 1.25805013687882            |   |                                    |
| KDM5C 0.00122857127234595   | 2 | 0.999385902998621                  |
| 0.0144482981763651          |   |                                    |
| SMC1A 2.99818258272265 2    |   | 0.223333012605437                  |
| 0.315602603521486           |   |                                    |
| HSD17B10 3.81892785941106 2 |   | 0.148159789372743                  |
| 0.144174352681481           |   |                                    |
| HUWE1 0.00452152358695114   | 2 | 0.997741791803747                  |
| 0.018922584370387           |   |                                    |
| PHF8 0.46758962559232 2     |   | 0.791524209873827                  |
| 0.407460915779089           |   |                                    |
| FAM120C 0.347169104939093   | 2 | 0.840646069455669                  |
| 0.289942532885957           |   |                                    |
| TSR2 0.166143431836963      | 2 | 0.920285145758982                  |
| 0.0714299887444313          |   |                                    |
| GNL3L 0.670859477924757     | 2 | 0.715030743748857                  |
| 0.318156319842497           |   |                                    |
| MAGED2 4.25840899634719 2   |   | 0.118931866748183                  |
| 0.318393850727163           |   |                                    |
| TRO 1.69117796013688 2      |   | 0.429304431980067                  |
| 1.62890552896336            |   |                                    |
| APEX2 0.0646042707307563    | 2 | 0.968214006190137                  |
| 0.0764471332775744          |   |                                    |
| FAM104B 0.0496747622155149  | 2 | 0.975468528742508                  |
| 0.0300207105786369          |   |                                    |
| MAGEH1 0.317574782860887    | 2 | 0.853177732584958                  |
| 0.169071113383623           |   |                                    |
| USP51 2.42156535639411 2    |   | 0.297963978232647                  |
| 2.75532700761809            |   |                                    |
| RRAGB 4.56711656219056 2    |   | 0.101920897517893                  |
| 1.42274571584323            |   |                                    |

|                     |                      |   |                      |
|---------------------|----------------------|---|----------------------|
| AL445472.1          | 4.65805419847442     | 2 | 0.0973904522579875   |
| 0.642391005539786   |                      |   |                      |
| UBQLN2              | 0.00461287940246131  | 2 | 0.997696218087082    |
| 0.0149525275104005  |                      |   |                      |
| NBDY                | 34.1717585509136     | 2 | 3.79924159910061e-08 |
| 0.307957697293682   |                      |   |                      |
| SPIN3               | 1.232641873296       | 2 | 0.539927214404698    |
| 0.977136415980367   |                      |   |                      |
| SPIN2B              | 3.58690500690007     | 2 | 0.166384733025332    |
| 0.804907281411557   |                      |   |                      |
| ZXDB                | 0.000684064709554571 | 2 | 0.99965802613162     |
| 0.0231314627621538  |                      |   |                      |
| ZXDA                | 0.274155121610172    | 2 | 0.871902598042038    |
| 0.456112966215337   |                      |   |                      |
| ARHGEF9             | 0.181053500767688    | 2 | 0.91344989843872     |
| 0.175662992726421   |                      |   |                      |
| MTMR8               | 0.00360113340652456  | 2 | 0.998201053344484    |
| 0.0611027291909246  |                      |   |                      |
| ZC4H2               | 0.258996283753572    | 2 | 0.878536220843276    |
| 0.346260426976992   |                      |   |                      |
| LAS1L               | 3.96591939852547     | 2 | 0.137661198025665    |
| 0.43009959052434    |                      |   |                      |
| MSN                 | 1.41862452456402     | 2 | 0.491982436015765    |
| 0.164214379811689   |                      |   |                      |
| YIPF6               | 0.0823834052653049   | 2 | 0.959645145812376    |
| 0.0716559534754602  |                      |   |                      |
| PJA1                | 0.481495353875801    | 2 | 0.786039937372006    |
| 0.260782630963207   |                      |   |                      |
| IGBP1               | 3.14038562408221     | 2 | 0.208005072607714    |
| 0.174185626714852   |                      |   |                      |
| PDZD11              | 0.740588087441022    | 2 | 0.690531254402998    |
| 0.171786694460884   |                      |   |                      |
| SNX12               | 0.163096679000634    | 2 | 0.921688154832159    |
| 0.127441243515625   |                      |   |                      |
| IL2RG               | 5.4103108358311      | 2 | 0.0668599318078247   |
| 0.279278433411984   |                      |   |                      |
| MED12               | 0.513149516691103    | 2 | 0.773697152078348    |
| 0.215653690875362   |                      |   |                      |
| ZMYM3               | 3.74745864744195     | 2 | 0.153549955220885    |
| 1.06306451294567    |                      |   |                      |
| NONO                | 0.784498697801917    | 2 | 0.6755356488866      |
| 0.0902830240952454  |                      |   |                      |
| TAF1                | 0.855739694928724    | 2 | 0.651896255228105    |
| 0.504504331104851   |                      |   |                      |
| OGT                 | 0.000354990051772952 | 2 | 0.999822520725424    |
| 0.00496405153019355 |                      |   |                      |
| GCNA                | 0.369192211451755    | 2 | 0.831440029911964    |
| 0.610478858536812   |                      |   |                      |
| NHSL2               | 0.762428056960737    | 2 | 0.683031685740818    |
| 0.548287652156069   |                      |   |                      |

|         |                    |   |                      |
|---------|--------------------|---|----------------------|
| PIN4    | 10.8781652677293   | 2 | 0.00434346599226398  |
|         | 0.482974689563387  |   |                      |
| RPS4X   | 6.95831883229232   | 2 | 0.030833318132063    |
|         | 0.101660727453739  |   |                      |
| HDAC8   | 3.37687883115618   | 2 | 0.184807707096215    |
|         | 0.370746466154413  |   |                      |
| CHIC1   | 3.18661290663822   | 2 | 0.203252454712859    |
|         | 5.86396378680674   |   |                      |
| JPX     | 0.713758010190802  | 2 | 0.699857171763675    |
|         | 0.13826032858685   |   |                      |
| FTX     | 1.52328042763362   | 2 | 0.466899982812681    |
|         | 0.365437850968018  |   |                      |
| RLIM    | 0.139526954748795  | 2 | 0.932614378222816    |
|         | 0.162750548257494  |   |                      |
| ABCB7   | 0.232444433800472  | 2 | 0.890277366637976    |
|         | 0.112961212545553  |   |                      |
| UPRT    | 0.10984531449817   | 2 | 0.94655835454949     |
|         | 0.0905008252178775 |   |                      |
| PBDC1   | 10.5982742148873   | 2 | 0.00499590297500097  |
|         | 0.500448782848519  |   |                      |
| ATRX    | 0.613055028484198  | 2 | 0.735998267466254    |
|         | 0.0880546138831013 |   |                      |
| MAGT1   | 1.77096481103373   | 2 | 0.412515125699656    |
|         | 0.54478750141179   |   |                      |
| COX7B   | 7.78657731485581   | 2 | 0.0203782187386695   |
|         | 0.118916778404845  |   |                      |
| ATP7A   | 0.691733427344902  | 2 | 0.707606795132449    |
|         | 0.760046331681691  |   |                      |
| PGK1    | 25.6025928283025   | 2 | 2.75719578635147e-06 |
|         | 0.210369444719585  |   |                      |
| TAF9B   | 2.12937658377726   | 2 | 0.344835325984722    |
|         | 0.432827413326739  |   |                      |
| CYSLTR1 | 17.1151998603426   | 2 | 0.000192079745663154 |
|         | 1.71909040613268   |   |                      |
| P2RY10  | 0.0135693701193582 | 2 | 0.993238278952121    |
|         | 0.075028389210336  |   |                      |
| GPR174  | 7.06395029955587   | 2 | 0.0292470913937701   |
|         | 1.62332253500179   |   |                      |
| BRWD3   | 0.0681895504455051 | 2 | 0.96647990194875     |
|         | 0.0775518286588306 |   |                      |
| HMG5    | 3.67179338338435   | 2 | 0.159470441817044    |
|         | 1.04086095119851   |   |                      |
| SH3BGRL | 13.4119987458594   | 2 | 0.00122354931067647  |
|         | 0.354652257303352  |   |                      |
| HDX     | 1.93291503410558   | 2 | 0.380428314704322    |
|         | 1.37495478983249   |   |                      |
| AP00L   | 1.89217910882742   | 2 | 0.388256313982352    |
|         | 0.536167053163646  |   |                      |
| ZNF711  | 3.4664598429918    | 2 | 0.176712718998715    |
|         | 1.42835754954949   |   |                      |
| CHM     | 1.99322007881528   | 2 | 0.369128654174867    |



|                           |   |                                    |
|---------------------------|---|------------------------------------|
| 0.53100135554332          |   |                                    |
| DIAPH2 4.02379160627622 2 |   | 0.133734899149117                  |
| 0.720951235209178         |   |                                    |
| SYTL4 3.90859282615382 2  |   | 0.141664114656583                  |
| 15.1617190572795          |   |                                    |
| CSTF2 0.951296525396413   | 2 | 0.621482042224005                  |
| 0.238681533707145         |   |                                    |
| XKRX 3.92385360424004 2   |   | 0.140587275922258                  |
| 3.49488988360742          |   |                                    |
| TRMT2B 0.264660850746146  | 2 | 0.876051477613727                  |
| 0.235906642904567         |   |                                    |
| TIMM8A 0.810031629631386  | 2 | 0.666966262826547                  |
| 0.242754270541203         |   |                                    |
| BTK 9.60637671676697 2    |   | 0.00820354945187951                |
| 0.267838416135509         |   |                                    |
| RPL36A 50.2508481026955 2 |   | 1.22508669875288e-11               |
| 0.303781953939041         |   |                                    |
| GLA 12.3990815742342 2    |   | 0.00203036279100122                |
| 1.59122193888154          |   |                                    |
| HNRNPH2 1.7454012462207 2 |   | 0.417821645420551                  |
| 0.0955259503798676        |   |                                    |
| ARMCX6 1.98687958030086 2 |   | 0.370300740938507                  |
| 0.235191358938567         |   |                                    |
| ARMCX3 2.98518172070325 2 |   | 0.22478950222247 0.354706465260229 |
| ARMCX2 2.70647784674719 2 |   | 0.258401959635536                  |
| 1.7757339111327           |   |                                    |
| ZMAT1 0.679817140534873   | 2 | 0.711835402707942                  |
| 0.583994058155368         |   |                                    |
| BEX5 7.54154814441503 2   |   | 0.0230342262301847                 |
| 1.10994883885198          |   |                                    |
| ARMCX5 1.06116174158472 2 |   | 0.588263165524865                  |
| 0.443131822468569         |   |                                    |
| BEX1 0.0248639944653631   | 2 | 0.987644960800775                  |
| 0.104873055361186         |   |                                    |
| BEX4 1.51038402959092 2   |   | 0.469920374402502                  |
| 0.0937892747049714        |   |                                    |
| TCEAL8 0.216123007413502  | 2 | 0.897572390703668                  |
| 0.0162611738542521        |   |                                    |
| BEX2 1.96459177614903 2   |   | 0.374450414970305                  |
| 0.203117960177048         |   |                                    |
| TCEAL9 0.303293534255903  | 2 | 0.859291757234367                  |
| 0.257339952699265         |   |                                    |
| BEX3 0.754618465208674    | 2 | 0.685703999074047                  |
| 0.318536415998627         |   |                                    |
| TCEAL4 0.214516038583576  | 2 | 0.898293865939139                  |
| 0.0734558923489876        |   |                                    |
| TCEAL3 7.62404756254904 2 |   | 0.0221034012126625                 |
| 0.65952298446185          |   |                                    |
| TCEAL1 22.0486261446942 2 |   | 1.63005277667994e-05               |
| 1.4763536377662           |   |                                    |

|          |                    |   |                      |
|----------|--------------------|---|----------------------|
| MORF4L2  | 0.526381715346351  | 2 | 0.768595191021823    |
|          | 0.116874203881278  |   |                      |
| TMSB15B  | 0.416440891945264  | 2 | 0.812028008675482    |
|          | 0.651460115973283  |   |                      |
| SLC25A53 | 0.228469139599221  | 2 | 0.892048683657928    |
|          | 0.208558160741662  |   |                      |
| ZCCHC18  | 9.67892941181769   | 2 | 0.00791128778395056  |
|          | 5.89372486265836   |   |                      |
| FAM199X  | 0.170291717272837  | 2 | 0.918378321222202    |
|          | 0.180404082618757  |   |                      |
| CXorf57  | 0.332087080889602  | 2 | 0.847009354222487    |
|          | 0.530051886443755  |   |                      |
| MORC4    | 2.57000498383326   | 2 | 0.276649894242642    |
|          | 0.844636002272316  |   |                      |
| RBM41    | 5.24113611003223   | 2 | 0.0727615185400456   |
|          | 0.635347490903525  |   |                      |
| PRPS1    | 0.442862250997247  | 2 | 0.801371114283162    |
|          | 0.122396277973798  |   |                      |
| TSC22D3  | 32.723646225735    | 2 | 7.83701193940445e-08 |
|          | 0.471608917009564  |   |                      |
| PSMD10   | 0.082568194471408  | 2 | 0.959556483876064    |
|          | 0.0720255434779617 |   |                      |
| ATG4A    | 2.00384863301407   | 2 | 0.36717220538119     |
|          | 0.0291743879869182 | 2 | 0.372307605461112    |
|          | 0.0689404071198136 |   | 0.985518683676268    |
| ACSL4    | 2.43514826229215   | 2 | 0.295947225984667    |
|          | 0.602570611921546  |   |                      |
| TMEM164  | 0.831845300070266  | 2 | 0.659731298703624    |
|          | 0.735427683735929  |   |                      |
| AMMECR1  | 0.0593110362904353 | 2 | 0.970779892012776    |
|          | 0.121060439069352  |   |                      |
| ALG13    | 1.43033626219004   | 2 | 0.489109870304769    |
|          | 0.123563302675641  |   |                      |
| WDR44    | 0.237388182891051  | 2 | 0.888079430307715    |
|          | 0.36410733999602   |   |                      |
| DOCK11   | 4.73573880023479   | 2 | 0.0936801086290753   |
|          | 0.960000722320934  |   |                      |
| PGRMC1   | 2.98782313480552   | 2 | 0.224492817102053    |
|          | 0.588297313412438  |   |                      |
| SLC25A43 | 2.06324911262705   | 2 | 0.356427453505764    |
|          | 1.04593235435552   |   |                      |
| SLC25A5  | 22.0527745183282   | 2 | 1.62667524672422e-05 |
|          | 0.250003151168276  |   |                      |
| CXorf56  | 0.112156996328281  | 2 | 0.945464915717218    |
|          | 0.126444827234917  |   |                      |
| UBE2A    | 5.99782657877209   | 2 | 0.0498412019119181   |
|          | 0.158401845602529  |   |                      |
| NKRF     | 0.0116217561813264 | 2 | 0.994205972406901    |
|          | 0.045206174854084  |   |                      |
| SEPT6    | 37.4127446133037   | 2 | 7.51494366735272e-09 |

|                               |   |                                   |
|-------------------------------|---|-----------------------------------|
| 0.308220913148382             |   |                                   |
| SOWAHD 0.735128873978288      | 2 | 0.692418707994338                 |
| 0.627082107138946             |   |                                   |
| RPL39 33.1249369938595 2      |   | 6.41226297615205e-08              |
| 0.154657290194609             |   |                                   |
| UPF3B 4.02014538593996 2      |   | 0.133978934988107                 |
| 0.322793854789307             |   |                                   |
| RNF113A 2.37028854265881 2    |   | 0.305702072272715                 |
| 0.157653977165902             |   |                                   |
| NDUFA1 13.8585919359514 2     |   | 0.000978689654761888              |
| 0.225605076783224             |   |                                   |
| NKAP 0.306363095152349        | 2 | 0.857973944581273                 |
| 0.0929402391744796            |   |                                   |
| ZBTB33 1.17695921674712 2     |   | 0.555170720310244                 |
| 0.820409520714762             |   |                                   |
| LAMP2 8.77134619651999 2      |   | 0.0124545022086076                |
| 0.44165869772402              |   |                                   |
| CUL4B 0.591994996873658       | 2 | 0.743789288653744                 |
| 0.258300735157728             |   |                                   |
| MCTS1 3.01046835343403 2      |   | 0.221965308638058                 |
| 0.194401530887165             |   |                                   |
| C1GALT1C1 4.12453362313648 2  |   | 0.127165382971107                 |
| 0.466120997172176             |   |                                   |
| THOC2 4.43173995785285 2      |   | 0.109058594286493                 |
| 0.241269670374844             |   |                                   |
| XIAP 0.0712799723144297       | 2 | 0.964987639863086                 |
| 0.0794340246773794            |   |                                   |
| AL121601.1 1.32490341599569 2 |   | 0.515585718036177                 |
| 0.476554004734896             |   |                                   |
| STAG2 3.07532892072033 2      |   | 0.214882382140017                 |
| 0.202971441942531             |   |                                   |
| SASH3 3.57531739820537 2      |   | 0.16735153163138 0.22678382892928 |
| ZDHHC9 0.405844595494588      | 2 | 0.816341670548064                 |
| 0.547763464787177             |   |                                   |
| UTP14A 0.267548720925937      | 2 | 0.874787428966368                 |
| 0.141836511486349             |   |                                   |
| ELF4 0.0564610534696312       | 2 | 0.972164231121701                 |
| 0.137124335179056             |   |                                   |
| AIFM1 0.389088064817872       | 2 | 0.823209929542212                 |
| 0.114670301869748             |   |                                   |
| RAB33A 4.12716708499382 2     |   | 0.126998050568345                 |
| 0.670839026654107             |   |                                   |
| ZNF280C 0.216260441241077     | 2 | 0.897510714418204                 |
| 0.463230023839071             |   |                                   |
| SLC25A14 7.23010157309703 2   |   | 0.0269155582342121                |
| 0.636629122164525             |   |                                   |
| RBMX2 6.35613815758498 2      |   | 0.0416660313196547                |
| 0.428669989424232             |   |                                   |
| ENOX2 1.54997452415831e-06    | 2 | 0.999999225013038                 |
| 0.000161562845434695          |   |                                   |

|            |                    |   |                      |
|------------|--------------------|---|----------------------|
| STK26      | 0.847026341787914  | 2 | 0.654742552064921    |
|            | 0.348800925344128  |   |                      |
| RAP2C      | 0.795324340680424  | 2 | 0.671888973348641    |
|            | 0.134274071296609  |   |                      |
| RAP2C-AS1  | 2.36706925582914   | 2 | 0.306194539842511    |
|            | 1.21677390248068   |   |                      |
| MBNL3      | 0.365702025155358  | 2 | 0.832892236961046    |
|            | 0.209808563665116  |   |                      |
| PHF6       | 23.7614250537107   | 2 | 6.92264575508084e-06 |
|            | 0.953150345326262  |   |                      |
| HPRT1      | 0.424811175705906  | 2 | 0.80863665784066     |
|            | 0.124337872146429  |   |                      |
| FAM122B    | 0.615133493649456  | 2 | 0.735233791388972    |
|            | 0.281608063014524  |   |                      |
| FAM122C    | 1.29130395041369   | 2 | 0.524320586622541    |
|            | 0.744377202376861  |   |                      |
| MOSPD1     | 0.532880482656398  | 2 | 0.76610178358336     |
|            | 0.205871451004329  |   |                      |
| RTL8C      | 0.505799284743745  | 2 | 0.776545810208963    |
|            | 0.324344472741239  |   |                      |
| RTL8A      | 3.27989821446622   | 2 | 0.193989914723181    |
|            | 1.16476214323626   |   |                      |
| ZNF75D     | 0.663093102261487  | 2 | 0.71781274044424     |
|            | 0.624683488120255  |   |                      |
| INTS6L     | 0.251053993625811  | 2 | 0.882031952054019    |
|            | 0.374840255947503  |   |                      |
| MMGT1      | 0.0993889948146389 | 2 | 0.951520071950647    |
|            | 0.129229927879927  |   |                      |
| SLC9A6     | 1.14374330487172   | 2 | 0.564467961558191    |
|            | 1.06511644928566   |   |                      |
| MAP7D3     | 0.0635574595426661 | 2 | 0.968720907463119    |
|            | 0.0789649529713703 |   |                      |
| HTATSF1    | 7.13247203740981   | 2 | 0.0282620314871831   |
|            | 0.503431554683213  |   |                      |
| ARHGEF6    | 0.702179946161127  | 2 | 0.703920417117963    |
|            | 0.342669939342004  |   |                      |
| AL683813.1 | 4.3606844861669    | 2 | 0.113002849577986    |
|            | 1.42122063558982   |   |                      |
| RBMX       | 1.06268657294203   | 2 | 0.587814835392973    |
|            | 0.0924164546857957 |   |                      |
| ATP11C     | 0.395219441279686  | 2 | 0.820690089045873    |
|            | 0.261404066976648  |   |                      |
| LDOC1      | 0.0144521021378932 | 2 | 0.992799994065829    |
|            | 0.121985304932955  |   |                      |
| FMR1       | 2.09821335210554   | 2 | 0.350250496554068    |
|            | 0.370420291551602  |   |                      |
| AFF2       | 0.567840684807524  | 2 | 0.752826610675982    |
|            | 0.291606001484945  |   |                      |
| IDS        | 4.80880458359188   | 2 | 0.0903194641641708   |
|            | 0.395129433201329  |   |                      |

|                      |                      |   |                      |
|----------------------|----------------------|---|----------------------|
| LINC00893            | 1.12565291901446     | 2 | 0.569596844069962    |
| 0.878784532564901    |                      |   |                      |
| CXorf40A             | 0.0793449362953821   | 2 | 0.961104179837994    |
| 0.188854615556533    |                      |   |                      |
| TMEM185A             | 4.82271691528325     | 2 | 0.0896933671343815   |
| 0.960638993603195    |                      |   |                      |
| CXorf40B             | 1.71559574008709     | 2 | 0.424094967005322    |
| 0.689160961425566    |                      |   |                      |
| MTM1                 | 0.600316629264813    | 2 | 0.740700947600698    |
| 0.165175453613302    |                      |   |                      |
| MTMR1                | 0.452150763729704    | 2 | 0.797657970453974    |
| 0.321818256451968    |                      |   |                      |
| HMGB3                | 4.63153826011292     | 2 | 0.0986902491670791   |
| 0.870790123471278    |                      |   |                      |
| VMA21                | 7.04939589553882     | 2 | 0.0294607046968792   |
| 0.260523055515127    |                      |   |                      |
| CETN2                | 6.58403294799146     | 2 | 0.0371788036669773   |
| 0.516017161994142    |                      |   |                      |
| NSDHL                | 1.56515190274597     | 2 | 0.457226699288335    |
| 0.355176043479995    |                      |   |                      |
| ZNF185               | 1.36240263722582     | 2 | 0.506008749363014    |
| 0.938210042900274    |                      |   |                      |
| ZNF275               | 8.37173866659975     | 2 | 0.0152089785217442   |
| 2.34306959009731     |                      |   |                      |
| HAUS7                | 0.263312055212643    | 2 | 0.876642484038096    |
| 0.214337619509929    |                      |   |                      |
| CCNQ                 | 1.93466869141229     | 2 | 0.380094890456772    |
| 0.252487703857775    |                      |   |                      |
| BCAP31               | 0.171349393039481    | 2 | 0.917892776373289    |
| 0.0581078929015435   |                      |   |                      |
| IDH3G                | 0.772645534415942    | 2 | 0.679551153450672    |
| 0.062953273065046    |                      |   |                      |
| SSR4                 | 31.8710270576045     | 2 | 1.20031271921839e-07 |
| 0.328418289997376    |                      |   |                      |
| ARHGAP4              | 0.379748205216771    | 2 | 0.827063252495287    |
| 0.167515464684371    |                      |   |                      |
| NAA10                | 4.91620968022894e-05 | 2 | 0.99997541925371     |
| 0.000373114676281883 |                      |   |                      |
| RENBP                | 0.099727330420017    | 2 | 0.951359119005273    |
| 0.159826787325224    |                      |   |                      |
| HCFC1                | 0.0291801484914515   | 2 | 0.985515845137934    |
| 0.0564853453998885   |                      |   |                      |
| TMEM187              | 0.270630575482691    | 2 | 0.873440483193556    |
| 0.310100580938559    |                      |   |                      |
| IRAK1                | 0.150619228040127    | 2 | 0.92745628840071     |
| 0.145207696584062    |                      |   |                      |
| MECP2                | 3.03663701213938     | 2 | 0.21907995903137     |
| FLNA                 | 1.1707681499571      | 2 | 0.347858785893036    |
| 0.618797119205716    |                      |   | 0.556891932475331    |
| EMD                  | 2.03796931292849     | 2 | 0.360961253850252    |

|                    |                       |                      |
|--------------------|-----------------------|----------------------|
| 0.310991100561486  |                       |                      |
| RPL10              | 15.7814027508918 2    | 0.000374207023305373 |
| 0.135987601122471  |                       |                      |
| AC245140.2         | 0.47953505853655 2    | 0.786810750278382    |
| 0.487265152801688  |                       |                      |
| DNASE1L1           | 0.437863993647879 2   | 0.803376348439355    |
| 0.230610402691061  |                       |                      |
| TAZ                | 1.17264596022976 2    | 0.556369309164798    |
| 0.358920659871596  |                       |                      |
| AC244090.1         | 0.393225279825472 2   | 0.821508791404933    |
| 0.216813055759766  |                       |                      |
| ATP6AP1            | 12.5847290594516 2    | 0.00185037949272482  |
| 0.674046325707995  |                       |                      |
| GDI1               | 0.00487631499197333 2 | 0.997564812395823    |
| 0.0160159542843206 |                       |                      |
| FAM50A             | 2.08351252697 2       | 0.352834467196941    |
| 0.241634238952134  |                       |                      |
| PLXNA3             | 3.01878433257234 2    | 0.221044295308874    |
| 0.846829063913485  |                       |                      |
| LAGE3              | 1.42404943864869 2    | 0.490649763018702    |
| 0.172957889327601  |                       |                      |
| UBL4A              | 0.0166798391371931 2  | 0.991694761082361    |
| 0.0396803753244612 |                       |                      |
| SLC10A3            | 1.37374938111678 2    | 0.503146101631243    |
| 0.370341120366474  |                       |                      |
| FAM3A              | 0.947238663254312 2   | 0.622744266499597    |
| 0.253411054276503  |                       |                      |
| G6PD               | 2.35914603024737 2    | 0.307409969990242    |
| 0.353892165171111  |                       |                      |
| IKBKG              | 0.595998552186594 2   | 0.742301877104884    |
| 0.164096640441847  |                       |                      |
| DKC1               | 0.0399028641954244 2  | 0.980246280656228    |
| 0.0316954797664412 |                       |                      |
| MPP1               | 3.16499288075483 2    | 0.205461534959713    |
| 0.772571897768399  |                       |                      |
| F8                 | 0.267206678737464 2   | 0.874937048863409    |
| 0.557615341126546  |                       |                      |
| F8A1               | 0.3770061748806 2     | 0.828197946422979    |
| 0.251866398095371  |                       |                      |
| FUNDC2             | 0.125321968655191 2   | 0.939261844205464    |
| 0.0537060150872042 |                       |                      |
| BRCC3              | 0.069448074829928 2   | 0.965871923995753    |
| 0.0704763252857916 |                       |                      |
| VBP1               | 0.0217039997899745 2  | 0.989206670633229    |
| 0.0193892472656616 |                       |                      |
| RAB39B             | 0.649519201861235 2   | 0.722701069425211    |
| 0.34862638623344   |                       |                      |
| F8A3               | 0.623051966655936 2   | 0.732328581924433    |
| 0.386509283634057  |                       |                      |
| TMLHE              | 0.501467086693042 2   | 0.778229708418331    |

|                    |                   |   |                                   |
|--------------------|-------------------|---|-----------------------------------|
| 0.382974184607288  |                   |   |                                   |
| VAMP7              | 2.1400971556376   | 2 | 0.342991855217811                 |
| 0.339255986918282  |                   |   |                                   |
| ZNF596             | 1.62472140843585  | 2 | 0.443809126514965                 |
| 1.08572929572247   |                   |   |                                   |
| FBX025             | 0.836858513467992 | 2 | 0.658079682651544                 |
| 0.185521709807151  |                   |   |                                   |
| ERIC1              | 0.327964490324481 | 2 | 0.848757091290882                 |
| 0.0788016387858271 |                   |   |                                   |
| CLN8               | 4.01003785432036  | 2 | 0.134657746982639                 |
| 0.37747191900714   |                   |   |                                   |
| AC100810.1         | 1.62046517027498  | 2 | 0.444754610879999                 |
| 0.435791625528709  |                   |   |                                   |
| ARHGEF10           | 3.04731807627039  | 2 | 0.217913074151732                 |
| 1.34988181881786   |                   |   |                                   |
| MYOM2              | 2.85167377718977  | 2 | 0.240307268618981                 |
| 1.44934254163901   |                   |   |                                   |
| AC246817.2         | 0.352280826581496 | 2 | 0.838500238493017                 |
| 0.520636184440012  |                   |   |                                   |
| AC016065.1         | 0.746414957904438 | 2 | 0.688522364124654                 |
| 0.328718861474193  |                   |   |                                   |
| MCPH1              | 0.125509531687887 | 2 | 0.939173762935729                 |
| 0.106335582121241  |                   |   |                                   |
| ANGPT2             | 5.8972138468344   | 2 | 0.0524126699775801                |
| 1.31122700047764   |                   |   |                                   |
| AGPAT5             | 5.93157541408305  | 2 | 0.0515198706924075                |
| 0.754560887003402  |                   |   |                                   |
| PRAG1              | 0.459601284926399 | 2 | 0.794692014555028                 |
| 0.371417079959652  |                   |   |                                   |
| AC103957.1         | 1.87501173378388  | 2 | 0.391603329175643                 |
| 1.57388778676183   |                   |   |                                   |
| AC103957.2         | 1.2723684807697   | 2 | 0.529308288761759                 |
| 0.763430874874436  |                   |   |                                   |
| CLDN23             | 11.7540926852142  | 2 | 0.00280305231621947               |
| 1.18553670649156   |                   |   |                                   |
| MFHAS1             | 11.3327228522945  | 2 | 0.00346043343977442               |
| 0.580171850883857  |                   |   |                                   |
| ERI1               | 3.26990610749851  | 2 | 0.194961523796925                 |
| 0.47670605634226   |                   |   |                                   |
| PPP1R3B            | 0.850985335297998 | 2 | 0.653447773235756                 |
| 0.792614505980382  |                   |   |                                   |
| TNKS               | 7.00488056743605  | 2 | 0.0301237830786104                |
| 0.39550015015223   |                   |   |                                   |
| MSRA               | 2.77703105934246  | 2 | 0.249445324104537                 |
| 0.273279868130096  |                   |   |                                   |
| PINX1.1            | 0.37329749342398  | 2 | 0.829735132398936                 |
| 0.193558895012373  |                   |   |                                   |
| XKR6               | 5.10125669381353  | 2 | 0.0780326190387135                |
| 0.522863861733403  |                   |   |                                   |
| MTMR9              | 2.4143876914035   | 2 | 0.2990352421838 0.364087411843684 |

FAM167A-AS1 5.68332845942527 2 0.0583285130999877  
 2.7629380110897  
 FAM167A 0.15768180409101 2 0.924186949002281  
 0.294746724151408  
 AF131216.5 1.48844073626339 2 0.475104562244515  
 1.24725341705165  
 BLK 71.4902581765205 2 3.33066907387547e-16  
 0.796456107676014  
 NEIL2 4.17038308355526 2 0.124283312439171  
 1.50184943730705  
 FDFT1 2.18408743571054 2 0.335530063728831  
 0.0857907240170532  
 AC069185.1 0.746250494851822 2 0.688578984697519  
 0.638993113085346  
 CTSB 0.0598637364393859 2 0.970511653982826  
 0.0787596027027382  
 LONRF1 1.56080849584986 2 0.458220739076857  
 0.50049256530379  
 ZDHHC2 0.452109667608624 2 0.797674360946637  
 0.356685346168593  
 CNOT7 3.90908081225053 2 0.14162955381388 0.243152556704483  
 VPS37A 2.538138683523 2 0.281093101696166  
 0.431097981397837  
 PCM1 2.10904952293032 2 0.348357941091342  
 0.243055489122338  
 ASAH1 1.43235296406556 2 0.48861692448134 0.316950227707042  
 NAT1 16.5148466933654 2 0.000259326325144693  
 1.56616559342216  
 INTS10 1.24890489801737 2 0.535554591698358  
 0.229424155631242  
 ATP6V1B2 0.111882593596541 2 0.945594643694261  
 0.0625738574398136  
 DOK2 0.645950670525038 2 0.723991711213193  
 0.463089564262147  
 XP07 0.277534097933904 2 0.870430772590279  
 0.303137537700749  
 FAM160B2 0.185922816331442 2 0.911228665603242  
 0.217453692575712  
 NUDT18 0.00559539554440384 2 0.997206212137112  
 0.0228735959322145  
 REEP4 0.711314122863625 2 0.700712880507593  
 0.333926220428606  
 POLR3D 0.50349811870873 2 0.777439804839401  
 0.118654797827354  
 PPP3CC 3.02241547707933 2 0.220643337513583  
 0.276989498875869  
 PDLIM2 5.28319181551858 2 0.071247474380043  
 0.457988604048749  
 C8orf58 0.452562343373153 2 0.797493837451467  
 0.347725278977732



|           |                      |   |                      |
|-----------|----------------------|---|----------------------|
| CCAR2     | 1.46742247776294     | 2 | 0.480123825344222    |
|           | 0.452621940318717    |   |                      |
| BIN3      | 0.000547494497102582 | 2 | 0.999726290216808    |
|           | 0.00530651514827018  |   |                      |
| EGR3      | 0.162959267838156    | 2 | 0.921751482128003    |
|           | 0.454716538225416    |   |                      |
| PEBP4     | 10.3616652719586     | 2 | 0.00562332228412998  |
|           | 3.6875159592278      |   |                      |
| RHOBTB2   | 1.56642499551279     | 2 | 0.456935745898992    |
|           | 0.277162324685357    |   |                      |
| TNFRSF10B | 8.88798396017354e-05 | 2 | 0.999955561067638    |
|           | 0.00566272957925421  |   |                      |
| TNFRSF10A | 1.64871422488575     | 2 | 0.438516818870339    |
|           | 0.592977541564702    |   |                      |
| CHMP7     | 13.9881816359648     | 2 | 0.000917286394217731 |
|           | 0.603347260037849    |   |                      |
| R3HCC1    | 0.420957734883942    | 2 | 0.810196176490153    |
|           | 0.154145375290884    |   |                      |
| LOXL2     | 3.22859076482536     | 2 | 0.199030861689976    |
|           | 0.245614397926301    |   |                      |
| ENTPD4    | 1.98619833070891     | 2 | 0.370426896037397    |
|           | 0.216465381522078    |   |                      |
| SLC25A37  | 3.85490165334964     | 2 | 0.145518678407542    |
|           | 0.573864669411525    |   |                      |
| ADAM28    | 60.1393344591789     | 2 | 8.72635297355373e-14 |
|           | 1.02225037272077     |   |                      |
| DOCK5     | 0.261025952422287    | 2 | 0.877645104366665    |
|           | 0.355551723332105    |   |                      |
| KCTD9     | 5.47532145400945     | 2 | 0.0647215713706586   |
|           | 0.321068066665065    |   |                      |
| CDCA2     | 2.64887198542339     | 2 | 0.265952916179577    |
|           | 0.352373737580623    |   |                      |
| PPP2R2A   | 0.0356922105276695   | 2 | 0.982312193402394    |
|           | 0.026078175311648    |   |                      |
| BNIP3L    | 2.82542016762716     | 2 | 0.243482530145995    |
|           | 0.301184076226387    |   |                      |
| DPYSL2    | 1.58051172834487     | 2 | 0.45372868751394     |
|           | 0.454630486248568    |   | 0.346685461195241    |
| TRIM35    | 0.416311136642754    | 2 | 0.812080692854433    |
|           | 0.454630486248568    |   |                      |
| PTK2B     | 0.0766192030524263   | 2 | 0.962414929630146    |
|           | 0.0415812476735938   |   |                      |
| CCDC25    | 0.0236459208222748   | 2 | 0.98824665615723     |
|           | 0.0256677007797976   |   |                      |
| PBK       | 2.08089519718731     | 2 | 0.353296511541284    |
|           | 2.81784592352768     |   |                      |
| NUGGC     | 0.21755430190329     | 2 | 0.896930275286638    |
|           | 0.106778396800274    |   |                      |
| ELP3      | 0.534163108324667    | 2 | 0.765610630185617    |
|           | 0.193753744978956    |   |                      |
| PNOC      | 0.229816092136956    | 2 | 0.891448112296789    |

|                    |                    |   |                     |
|--------------------|--------------------|---|---------------------|
| 0.10045677847813   |                    |   |                     |
| ZNF395             | 0.292922298667385  | 2 | 0.863759289306821   |
| 0.250827931792834  |                    |   |                     |
| FBX016             | 6.54913398307281   | 2 | 0.037833247799542   |
| 1.80863743363098   |                    |   |                     |
| FZD3               | 13.004330933346    | 2 | 0.00150018706796529 |
| 1.68271041474003   |                    |   |                     |
| INTS9              | 1.76107481304137   | 2 | 0.414560064525296   |
| 0.498883341304475  |                    |   |                     |
| HMB0X1             | 0.794467664782412  | 2 | 0.672176830539123   |
| 0.273717351672034  |                    |   |                     |
| DUSP4              | 6.00431927765567   | 2 | 0.0496796623027924  |
| 26.6552416356497   |                    |   |                     |
| LINC02099          | 12.4042990977227   | 2 | 0.00202507296117804 |
| 1.96348981078403   |                    |   |                     |
| SARAF              | 13.7723757326554   | 2 | 0.00102180167037857 |
| 0.387041181239971  |                    |   |                     |
| AC044849.1         | 1.40918131898991   | 2 | 0.494310874311454   |
| 0.907909305374098  |                    |   |                     |
| LEPROTL1           | 3.99134808556077   | 2 | 0.135922006036075   |
| 0.778274362674729  |                    |   |                     |
| AC026979.2         | 0.135104662077282  | 2 | 0.934678806623432   |
| 0.212585976905896  |                    |   |                     |
| DCTN6              | 4.94054356918707   | 2 | 0.0845618732637677  |
| 0.234589559148093  |                    |   |                     |
| GTF2E2             | 7.13541815118656   | 2 | 0.0282204305548139  |
| 0.451524937782094  |                    |   |                     |
| GSR                | 2.84812974068741   | 2 | 0.240733474996079   |
| 0.790223327283234  |                    |   |                     |
| UBXN8              | 1.58442950440347   | 2 | 0.452840753784729   |
| 0.807647023435464  |                    |   |                     |
| PPP2CB             | 1.71564112065649   | 2 | 0.424085344278954   |
| 0.424902261035304  |                    |   |                     |
| WRN                | 0.579408918463195  | 2 | 0.74848474264981    |
| 0.27936844948792   |                    |   |                     |
| AC090204.1         | 2.39958981574038   | 2 | 0.301255990809576   |
| 0.741867744363834  |                    |   |                     |
| FUT10              | 1.0396516684368    | 2 | 0.594624102123641   |
| 0.895958834392057  |                    |   |                     |
| TTI2               | 0.199810037775431  | 2 | 0.904923364581946   |
| 0.140216660661884  |                    |   |                     |
| MAK16              | 0.201541675711404  | 2 | 0.904140203854947   |
| 0.169637405868635  |                    |   |                     |
| RNF122             | 0.085342125790709  | 2 | 0.958226534494693   |
| 0.271928150649822  |                    |   |                     |
| ERLIN2             | 0.937891364461832  | 2 | 0.625661566773854   |
| 0.669272516440896  |                    |   |                     |
| PLPBP              | 0.0491518210743269 | 2 | 0.975723618403081   |
| 0.0452159412753486 |                    |   |                     |
| BRF2               | 1.35212057249936   | 2 | 0.508616855153308   |

|                     |                     |   |                      |
|---------------------|---------------------|---|----------------------|
| 0.251108589767834   |                     |   |                      |
| RAB11FIP1           | 3.11379835705688    | 2 | 0.210788676926311    |
| 0.291179393643116   |                     |   |                      |
| EIF4EBP1            | 0.00206544337235393 | 2 | 0.998967811387342    |
| 0.00946342624808507 |                     |   |                      |
| ASH2L               | 3.58828117269879    | 2 | 0.166270285914888    |
| 0.295871391663765   |                     |   |                      |
| LSM1                | 6.03039562748523    | 2 | 0.0490361345062647   |
| 0.319214346936264   |                     |   |                      |
| BAG4                | 0.10564449744566    | 2 | 0.948548603223925    |
| 0.135413772768146   |                     |   |                      |
| DDHD2               | 0.13272413128292    | 2 | 0.935791984821757    |
| 0.184106612474051   |                     |   |                      |
| PLPP5               | 2.19689073712915    | 2 | 0.333388978011823    |
| 0.542807828649498   |                     |   |                      |
| NSD3                | 1.50879706142579    | 2 | 0.470293396713726    |
| 0.132334291726187   |                     |   |                      |
| AC087623.3          | 0.0162151430087536  | 2 | 0.991925206211098    |
| 0.0829688265378991  |                     |   |                      |
| FGFR1               | 0.587230047986709   | 2 | 0.745563460245319    |
| 0.373851722878689   |                     |   |                      |
| TACC1               | 5.19663216460792    | 2 | 0.0743987541704623   |
| 0.349939254654712   |                     |   |                      |
| PLEKHA2             | 31.0741803196269    | 2 | 1.78783517990055e-07 |
| 0.725211254301032   |                     |   |                      |
| AC108863.1          | 2.92824194159387    | 2 | 0.231281205082286    |
| 1.43453221943407    |                     |   |                      |
| TM2D2               | 2.94170109165079    | 2 | 0.229730006168863    |
| 0.343676226894241   |                     |   |                      |
| GOLGA7              | 1.39522035054263    | 2 | 0.497773474825076    |
| 0.234920510543255   |                     |   |                      |
| GINS4               | 0.10142790914822    | 2 | 0.950550532280004    |
| 0.196827371542873   |                     |   |                      |
| GPAT4               | 6.33820168988245    | 2 | 0.0420413826356081   |
| 0.341594141291376   |                     |   |                      |
| NKX6-3              | 18.3852543590771    | 2 | 0.000101787100142081 |
| 1.4602569166122     |                     |   |                      |
| ANK1                | 22.7706123937606    | 2 | 1.13612036306554e-05 |
| 0.9841171466101     |                     |   |                      |
| KAT6A               | 2.56151529050398    | 2 | 0.277826726592845    |
| 0.518493372986352   |                     |   |                      |
| AP3M2               | 1.54724877154231    | 2 | 0.461337967773558    |
| 0.668031808592642   |                     |   |                      |
| IKBKB               | 6.56770834070632    | 2 | 0.0374835102135436   |
| 0.751436574122225   |                     |   |                      |
| POLB                | 0.816167425576781   | 2 | 0.6649232139162      |
| 0.459698883026083   |                     |   |                      |
| VDAC3               | 7.60590919313663    | 2 | 0.0223047727987155   |
| 0.206090996947083   |                     |   |                      |
| SLC20A2             | 0.477769779827837   | 2 | 0.787505526984534    |

|                     |                     |   |                      |
|---------------------|---------------------|---|----------------------|
| 0.320863373083515   |                     |   |                      |
| SMIM19              | 0.292915293637075   | 2 | 0.863762314642121    |
| 0.0930164018390803  |                     |   |                      |
| THAP1               | 0.438620484998885   | 2 | 0.803072532271954    |
| 0.165840667535325   |                     |   |                      |
| RNF170              | 1.59758594905288    | 2 | 0.449871643070693    |
| 0.313982574777505   |                     |   |                      |
| H00K3               | 1.94779945606734    | 2 | 0.377607596133685    |
| 0.332660103915821   |                     |   |                      |
| FNTA                | 3.41572564801322    | 2 | 0.181252747995716    |
| 0.236922119358352   |                     |   |                      |
| HGSNAT              | 6.87999035784207    | 2 | 0.0320648399146134   |
| 0.888174049388211   |                     |   |                      |
| SPIDR               | 0.454588616699005   | 2 | 0.796686276360239    |
| 0.260524449057155   |                     |   |                      |
| CEBPD               | 0.119564995992187   | 2 | 0.941969391535211    |
| 0.229878561945875   |                     |   |                      |
| PRKDC               | 0.576422698986144   | 2 | 0.74960314725082     |
| 0.139437511555434   |                     |   |                      |
| MCM4                | 1.62314084554132    | 2 | 0.444159999259627    |
| 0.480533902538202   |                     |   |                      |
| UBE2V2              | 5.61910116568175    | 2 | 0.0602320556299059   |
| 0.271661975157448   |                     |   |                      |
| AC026904.2          | 7.8564651413874     | 2 | 0.0196784220552173   |
| 1.44035911092907    |                     |   |                      |
| AC022915.2          | 2.9603325996937     | 2 | 0.227599835418656    |
| 0.593885361239767   |                     |   |                      |
| PCMTD1              | 0.00102098991543764 | 2 | 0.999489635322662    |
| 0.00825656926346864 |                     |   |                      |
| AC064807.1          | 1.37482861534577    | 2 | 0.502874668625247    |
| 0.535933334107344   |                     |   |                      |
| RB1CC1              | 5.41670502679399    | 2 | 0.0666465155597982   |
| 0.433510455264639   |                     |   |                      |
| ATP6V1H             | 3.00634219967531    | 2 | 0.222423712833285    |
| 0.239453042113134   |                     |   |                      |
| RGS20               | 15.6209914698228    | 2 | 0.000405456998801346 |
| 1.02318317262705    |                     |   |                      |
| TCEA1               | 8.53293005009617    | 2 | 0.0140312958681122   |
| 0.111954424394883   |                     |   |                      |
| LYPLA1              | 14.1090510000547    | 2 | 0.000863492366996121 |
| 0.391188505733035   |                     |   |                      |
| MRPL15              | 1.17535914046917    | 2 | 0.555615055779095    |
| 0.130977891821704   |                     |   |                      |
| TMEM68              | 0.50158354095482    | 2 | 0.778184395654466    |
| 0.235778391751058   |                     |   |                      |
| TGS1                | 2.0993124173825     | 2 | 0.350058075350276    |
| 0.350696051600056   |                     |   |                      |
| LYN                 | 7.46356449981217    | 2 | 0.0239501126902633   |
| 0.189566480112425   |                     |   |                      |
| RPS20               | 84.5747216677115    | 2 | 0.31933388382504     |

|            |                     |   |                      |
|------------|---------------------|---|----------------------|
| PLAG1      | 0.432864212380842   | 2 | 0.805387213872606    |
|            | 0.402402890920742   |   |                      |
| CHCHD7     | 2.06427122276001    | 2 | 0.356245345987266    |
|            | 0.179024716633596   |   |                      |
| SDR16C5    | 2.1671556599162     | 2 | 0.338382681568373    |
|            | 1.44302349752055    |   |                      |
| IMPAD1     | 0.11313200938095    | 2 | 0.945004107732962    |
|            | 0.164086145063962   |   |                      |
| UBXN2B     | 3.81460239416084    | 2 | 0.1484805661351      |
| SDCBP      | 0.0399151852194392  | 2 | 0.859927590096723    |
|            | 0.0302285229741351  |   | 0.980240241855847    |
| NSMAF      | 3.60421739077099    | 2 | 0.164950690469288    |
|            | 0.650826972834863   |   |                      |
| TOX        | 18.236634098199     | 2 | 0.000109639039276077 |
|            | 0.691214252008691   |   |                      |
| AC090152.1 | 0.556511600518062   | 2 | 0.75710312956551     |
|            | 0.183151134193246   |   |                      |
| CA8        | 4.79614747307408    | 2 | 0.0908928683804581   |
|            | 2.98080310985817    |   |                      |
| RAB2A      | 2.20231763683856    | 2 | 0.33248556996839     |
| CHD7       | 1.55388587331308    | 2 | 0.161072903190601    |
|            | 0.141860267828774   |   | 0.459809531751194    |
| AC022182.1 | 0.228924259826054   | 2 | 0.891845712053298    |
|            | 0.392817778579464   |   |                      |
| AC022182.2 | 1.88820182850719    | 2 | 0.389029184306534    |
|            | 0.728074190821348   |   |                      |
| ASPH       | 0.12481249503123    | 2 | 0.939501139250606    |
|            | 0.0457758024448089  |   |                      |
| GGH        | 3.60033499569681    | 2 | 0.16527120333211     |
| YTHDF3-AS1 | 0.494560443762931   | 2 | 0.691651183607565    |
|            | 0.665157640529536   |   | 0.780921831482946    |
| YTHDF3     | 0.101117538788444   | 2 | 0.950698055081729    |
|            | 0.117387752997564   |   |                      |
| ARMC1      | 0.563182974350019   | 2 | 0.75458187795297     |
|            | 0.14347921041363    |   |                      |
| MTRF1      | 0.886519997037326   | 2 | 0.641940281866225    |
|            | 0.39744163531864    |   |                      |
| PDE7A      | 15.7413458494329    | 2 | 0.000381777368313685 |
|            | 1.31445050578268    |   |                      |
| DNAJC5B    | 4.33521162604455    | 2 | 0.114451306976252    |
|            | 1.36215976532049    |   |                      |
| TRIM55     | 2.93207292564311    | 2 | 0.230838611805778    |
|            | 0.786375792667684   |   |                      |
| RRS1       | 0.20519717180319    | 2 | 0.902489172658288    |
|            | 0.107166468969993   |   |                      |
| MYBL1      | 0.674072730274911   | 2 | 0.713882878981666    |
|            | 0.156411614193943   |   |                      |
| VCPIP1     | 0.0282412391653558  | 2 | 0.985978608761713    |
|            | 0.0406702762419968  |   |                      |
| SGK3       | 0.00220282742896404 | 2 | 0.998899192618975    |

|                    |                    |   |                                    |
|--------------------|--------------------|---|------------------------------------|
| 0.0197890318926799 |                    |   |                                    |
| C8orf44            | 4.2101740603424    | 2 | 0.12183507048062 0.880891085474481 |
| COP55              | 2.06876422144099   | 2 | 0.355445939321927                  |
| 0.147216301560762  |                    |   |                                    |
| CSPP1              | 2.41722960597026   | 2 | 0.298610627629448                  |
| 0.393128557010934  |                    |   |                                    |
| ARFGEF1            | 1.09737223038556   | 2 | 0.577708354181341                  |
| 0.313693571293913  |                    |   |                                    |
| SLC05A1            | 6.82995477059826   | 2 | 0.0328771502000236                 |
| 2.58762031599636   |                    |   |                                    |
| AC079089.1         | 3.29130038368736   | 2 | 0.19288710838884                   |
| 1.13009395829534   |                    |   |                                    |
| NCOA2              | 3.50186779948649   | 2 | 0.173611731765789                  |
| 0.743166712333358  |                    |   |                                    |
| TRAM1              | 14.0374183544618   | 2 | 0.000894980008123714               |
| 0.229535304218047  |                    |   |                                    |
| LACTB2-AS1         | 1.05127466093754   | 2 | 0.591178468225596                  |
| 0.716281780718702  |                    |   |                                    |
| LACTB2             | 0.0223743071553949 | 2 | 0.988875189926198                  |
| 0.0430695640050926 |                    |   |                                    |
| TERF1              | 0.0235909355728998 | 2 | 0.98827382602513                   |
| 0.0272588709709138 |                    |   |                                    |
| C8orf89            | 2.00160728948843   | 2 | 0.367583915556748                  |
| 0.484345960604953  |                    |   |                                    |
| RPL7               | 73.6485440278471   | 2 | 1.11022302462516e-16               |
| 0.230403882318143  |                    |   |                                    |
| STAU2              | 0.668368546633419  | 2 | 0.715921844778464                  |
| 0.204417035908699  |                    |   |                                    |
| UBE2W              | 0.110151746147276  | 2 | 0.946413337940414                  |
| 0.128540014352694  |                    |   |                                    |
| ELOC               | 5.05466821586782   | 2 | 0.079871665955333                  |
| 0.220158124545915  |                    |   |                                    |
| TMEM70             | 4.2912505062351    | 2 | 0.116994862767605                  |
| 0.320550612518112  |                    |   |                                    |
| LY96               | 2.12793993677804   | 2 | 0.345083118289735                  |
| 0.197149961098988  |                    |   |                                    |
| GDAP1              | 0.495441029090212  | 2 | 0.780578073012387                  |
| 0.354328757672304  |                    |   |                                    |
| PEX2               | 2.8728141742409    | 2 | 0.237780550563889                  |
| 0.311343704552771  |                    |   |                                    |
| PKIA               | 0.369364186591086  | 2 | 0.831368539478157                  |
| 0.324806240053546  |                    |   |                                    |
| ZC2HC1A            | 4.08094796037623   | 2 | 0.12996709444922 0.707560093091821 |
| IL7                | 12.856787107202    | 2 | 0.00161504323203965                |
| 1.36742917628551   |                    |   |                                    |
| MRPS28             | 1.36784334189594   | 2 | 0.504634097896027                  |
| 0.237507025651739  |                    |   |                                    |
| AC009686.2         | 0.579601266031018  | 2 | 0.748412761501315                  |
| 0.69668498990665   |                    |   |                                    |
| TPD52              | 36.2252436840439   | 2 | 1.3607811433225e-08                |

|                   |                    |   |                      |
|-------------------|--------------------|---|----------------------|
| 0.502240927990545 |                    |   |                      |
| ZBTB10            | 4.27436177289914   | 2 | 0.117986993348782    |
|                   | 3.72796261622642   |   |                      |
| PAG1              | 33.2987616783036   | 2 | 5.87848987265716e-08 |
|                   | 1.1776349039985    |   |                      |
| AC079209.1        | 0.33785996691595   | 2 | 0.844568035049232    |
|                   | 0.380454119151847  |   |                      |
| FABP5             | 3.92666917545326   | 2 | 0.140389498425562    |
|                   | 0.145822286021043  |   |                      |
| IMPA1             | 1.98864132631538   | 2 | 0.369974696634141    |
|                   | 0.368948751549584  |   |                      |
| ZFAND1            | 2.12834800420738   | 2 | 0.345012716881615    |
|                   | 0.23126828122916   |   |                      |
| SNX16             | 1.46274695120451   | 2 | 0.481247554186824    |
|                   | 0.639957811131059  |   |                      |
| LRRCC1            | 0.324578914050742  | 2 | 0.850195073982742    |
|                   | 0.368891061552844  |   |                      |
| E2F5              | 10.1682118897646   | 2 | 0.00619442277071469  |
|                   | 0.211241925289435  |   |                      |
| C8orf59           | 1.08543584031831   | 2 | 0.581166539609341    |
|                   | 0.131895091061947  |   |                      |
| CA13              | 2.39521525214161   | 2 | 0.301915643715634    |
|                   | 2.09922376255658   |   |                      |
| WWP1              | 1.78750067433948   | 2 | 0.409118539554474    |
|                   | 0.510427663641636  |   |                      |
| RMDN1             | 0.7458892543978    | 2 | 0.688703367222713    |
|                   | 0.157973081966612  |   |                      |
| CPNE3             | 2.88668554910608   | 2 | 0.236137084857919    |
|                   | 0.180051158663719  |   |                      |
| AF117829.1        | 0.0792322813402024 | 2 | 0.961158317936862    |
|                   | 0.15593929739472   |   |                      |
| RIPK2             | 0.538928864911624  | 2 | 0.763788445118527    |
|                   | 0.170373266352334  |   |                      |
| OSGIN2            | 6.72070883975785   | 2 | 0.0347229502598191   |
|                   | 1.60015301604968   |   |                      |
| NBN               | 1.53979437159472   | 2 | 0.463060675077942    |
|                   | 0.232882994840442  |   |                      |
| DECR1             | 0.605394869627186  | 2 | 0.738822604554949    |
|                   | 0.116315995255469  |   |                      |
| TMEM64            | 2.11502317220135   | 2 | 0.347319009336762    |
|                   | 0.591366103343754  |   |                      |
| PIP4P2            | 22.4256073464584   | 2 | 1.35002321923761e-05 |
|                   | 1.04181869906148   |   |                      |
| OTUD6B-AS1        | 1.7966577919279    | 2 | 0.407249647947202    |
|                   | 0.217389703276433  |   |                      |
| OTUD6B            | 0.0684966391856945 | 2 | 0.966331515793217    |
|                   | 0.118965264809589  |   |                      |
| LRRC69            | 6.05670618752954   | 2 | 0.0483952750109981   |
|                   | 2.38723377638504   |   |                      |
| TRIQQ             | 2.60128370357163   | 2 | 0.272356924141922    |

|                               |   |                      |                   |
|-------------------------------|---|----------------------|-------------------|
| 0.576038432537338             |   |                      |                   |
| FAM92A 2.53807550514426 2     |   | 0.281101981339636    |                   |
| 0.533073321104564             |   |                      |                   |
| RBM12B 2.07638497912413 2     |   | 0.354094132718624    |                   |
| 0.765220103934846             |   |                      |                   |
| TMEM67 1.77724189179027 2     |   | 0.411222459923977    |                   |
| 1.5189331385377               |   |                      |                   |
| PDP1 0.480573436384057        | 2 | 0.786402352878624    |                   |
| 0.309400912042996             |   |                      |                   |
| VIRMA 0.627851600434061       | 2 | 0.730573234523795    |                   |
| 0.261764540838902             |   |                      |                   |
| DPY19L4 0.339016006839243     | 2 | 0.844079998926903    |                   |
| 0.501504114455206             |   |                      |                   |
| INTS8 4.62114515380316 2      |   | 0.0992044331277939   |                   |
| 0.611999001689025             |   |                      |                   |
| CCNE2 2.24062001681474 2      |   | 0.326178660820526    |                   |
| 1.44153541203368              |   |                      |                   |
| NDUFAF6 0.501252651145738     | 2 | 0.778313152948346    |                   |
| 0.120624945159223             |   |                      |                   |
| TP53INP1 1.24545549738458 2   |   | 0.536479059858213    |                   |
| 0.272665382527017             |   |                      |                   |
| MIR3150BHG 0.178274306859122  | 2 | 0.914720107970733    |                   |
| 0.299732884921522             |   |                      |                   |
| PLEKHF2 4.03328780305518 2    |   | 0.13310141779587     | 0.159304670601318 |
| UQCRB 46.0184744957231 2      |   | 1.01675223795894e-10 |                   |
| 0.364914185822939             |   |                      |                   |
| MTERF3 1.61646365737695 2     |   | 0.445645347312139    |                   |
| 0.433750518752868             |   |                      |                   |
| PTDSS1 6.78436169756932 2     |   | 0.0336352434752253   |                   |
| 0.316533872087912             |   |                      |                   |
| CPQ 3.36676516827858 2        |   | 0.185744615416802    |                   |
| 1.33903288862382              |   |                      |                   |
| TSPYL5 4.58062763631487 2     |   | 0.101234687585346    |                   |
| 1.06420923625814              |   |                      |                   |
| MTDH 24.6141833003869 2       |   | 4.51957927050106e-06 |                   |
| 0.392666994522413             |   |                      |                   |
| RPL30 42.0758590636438 2      |   | 7.30034366291932e-10 |                   |
| 0.232521116693577             |   |                      |                   |
| RIDA 0.265363473116247        | 2 | 0.875743764985571    |                   |
| 0.16232409135989              |   |                      |                   |
| POP1 6.52059828250801 2       |   | 0.0383769161814609   |                   |
| 0.942066812098938             |   |                      |                   |
| STK3 0.852560484563067        | 2 | 0.652933336950944    |                   |
| 0.539205167635713             |   |                      |                   |
| AC104986.2 5.62128153091376 2 |   | 0.0601664274697713   |                   |
| 0.899830184487367             |   |                      |                   |
| VPS13B 0.462120610906706      | 2 | 0.793691600660186    |                   |
| 0.415527625324513             |   |                      |                   |
| COX6C 17.6429425002489 2      |   | 0.000147531145266555 |                   |
| 0.240658054823088             |   |                      |                   |



|            |                     |   |                      |
|------------|---------------------|---|----------------------|
| POLR2K     | 18.1165194890652    | 2 | 0.000116425410347953 |
|            | 0.261348056329164   |   |                      |
| SPAG1      | 0.447551350314289   | 2 | 0.799494460724201    |
|            | 0.129066788741499   |   |                      |
| RNF19A     | 1.9151699140523     | 2 | 0.383818706247012    |
|            | 0.187219719640592   |   |                      |
| ANKRD46    | 0.951660654841388   | 2 | 0.621368902568139    |
|            | 0.27837752384555    |   |                      |
| PABPC1     | 23.2239333622098    | 2 | 9.05705377574062e-06 |
|            | 0.194150028526512   |   |                      |
| YWHAZ      | 3.56081290365962    | 2 | 0.168569617912947    |
|            | 0.142088982748459   |   |                      |
| ZNF706     | 35.2782792934377    | 2 | 2.1848367226518e-08  |
|            | 0.312963888252589   |   |                      |
| NCALD      | 1.30477028766184    | 2 | 0.520802106253229    |
|            | 0.618600258014128   |   |                      |
| RRM2B      | 10.2536322881625    | 2 | 0.0059354279695204   |
|            | 0.663164005903609   |   |                      |
| UBR5-AS1   | 4.37482554729645    | 2 | 0.112206677472618    |
|            | 0.807776078715315   |   |                      |
| UBR5       | 0.0187516889233136  | 2 | 0.990667971723191    |
|            | 0.024415219263123   |   |                      |
| AP002852.1 | 1.29045500692811    | 2 | 0.524543193137472    |
|            | 0.758509640886667   |   |                      |
| KLF10      | 0.69587691599733    | 2 | 0.70614233228954     |
|            |                     |   | 0.211327640414348    |
| GASAL1     | 1.56296337895818    | 2 | 0.457727298885817    |
|            | 1.23610867473263    |   |                      |
| AZIN1      | 2.51158602005011    | 2 | 0.284849869832318    |
|            | 0.333026472161995   |   |                      |
| AZIN1-AS1  | 0.144665035058832   | 2 | 0.930221529414411    |
|            | 0.0749286920286646  |   |                      |
| AP003354.2 | 0.0405422117016065  | 2 | 0.979932971729726    |
|            | 0.121391168377188   |   |                      |
| ATP6V1C1   | 0.00104080405051051 | 2 | 0.999479733360393    |
|            | 0.0063045759551202  |   |                      |
| SLC25A32   | 2.25552548938214    | 2 | 0.323756773334385    |
|            | 0.304421048712887   |   |                      |
| DCAF13     | 4.50978730824353    | 2 | 0.104884697198451    |
|            | 0.297527983694631   |   |                      |
| OXR1       | 1.23995589174101    | 2 | 0.537956301621787    |
|            | 0.215793008939255   |   |                      |
| EIF3E      | 32.2709828781476    | 2 | 9.82754645439954e-08 |
|            | 0.314780614316671   |   |                      |
| EMC2       | 1.71415480071683    | 2 | 0.424400624667984    |
|            | 0.338686903774362   |   |                      |
| NUDCD1     | 3.20023388721618    | 2 | 0.201872908867875    |
|            | 0.426824478666206   |   |                      |
| ENY2       | 2.57175973017968    | 2 | 0.276407275496215    |
|            | 0.0745992509401546  |   |                      |
| PKHD1L1    | 0.528408038794419   | 2 | 0.767816874140018    |

|                                |                      |                   |
|--------------------------------|----------------------|-------------------|
| 0.225234273712935              |                      |                   |
| EBAG9 1.79272684385413 2       | 0.40805087369304     | 0.159649173359944 |
| SYBU 41.5633933413222 2        | 9.43243483320089e-10 |                   |
| 1.26084818234306               |                      |                   |
| TRPS1 2.06381569763885 2       | 0.356326494580418    |                   |
| 1.52685212515132               |                      |                   |
| EIF3H 30.4667044174866 2       | 2.42236283587438e-07 |                   |
| 0.346710810898803              |                      |                   |
| UTP23 0.157585084378666        | 2                    | 0.924231643630915 |
| 0.0919527164232461             |                      |                   |
| RAD21 10.3895720481509 2       | 0.00554540277073579  |                   |
| 0.30453801064019               |                      |                   |
| MED30 10.0586087833338 2       | 0.00654336060400751  |                   |
| 0.487495985004793              |                      |                   |
| EXT1 3.45054571739379 2        | 0.178124442338225    |                   |
| 0.862927559861935              |                      |                   |
| SAMD12 2.88799109118843 2      | 0.235982991706421    |                   |
| 1.78260961583261               |                      |                   |
| AC023590.1 2.84224591756905 2  | 0.241442734366477    |                   |
| 0.156773279336305              |                      |                   |
| TAF2 0.478841043195212         | 2                    | 0.787083827021215 |
| 0.209499638936173              |                      |                   |
| DSCC1 0.17711852194402 2       | 0.91524887059115     | 0.326807904579415 |
| MRPL13 7.0149934384723 2       | 0.0299718485591774   |                   |
| 0.251443801315794              |                      |                   |
| SNTB1 0.0588458413343054       | 2                    | 0.971005719229816 |
| 0.226409331135586              |                      |                   |
| AC016405.3 1.48028311924769 2  | 0.47704638023487     |                   |
| 1.24305903689008               |                      |                   |
| ZHX2 0.507172247102742         | 2                    | 0.776012909059469 |
| 0.241334490934916              |                      |                   |
| DERL1 6.25819871772812 2       | 0.0437571890355967   |                   |
| 0.288021658097478              |                      |                   |
| TBC1D31 2.73243864411369 2     | 0.255069474462952    |                   |
| 1.47967092079614               |                      |                   |
| C8orf76 0.637544608143466      | 2                    | 0.727041074753292 |
| 0.205722928725689              |                      |                   |
| ZHX1-C8orf76 0.382269345730466 | 2                    | 0.826021337999842 |
| 0.390767846448964              |                      |                   |
| ZHX1 0.273340476235074         | 2                    | 0.872257816090828 |
| 0.248142374873552              |                      |                   |
| ATAD2 0.808298501896094        | 2                    | 0.66754448218667  |
| 0.275809532992902              |                      |                   |
| WDYHV1 0.252499294069856       | 2                    | 0.881394781721406 |
| 0.230379883688103              |                      |                   |
| FBX032 2.54154607947275 2      | 0.280614611665041    |                   |
| 1.76997758011556               |                      |                   |
| FAM91A1 4.370864412821 2       | 0.112429130560806    |                   |
| 0.77370511592688               |                      |                   |
| TMEM65 1.46460424634666 2      | 0.480800852260975    |                   |

|                              |   |  |                    |
|------------------------------|---|--|--------------------|
| 1.34142074455421             |   |  |                    |
| TRMT12 0.554026374085281     | 2 |  | 0.758044500679443  |
| 0.386234197714137            |   |  |                    |
| RNF139 0.146204313830197     | 2 |  | 0.929505869723233  |
| 0.0716494070253159           |   |  |                    |
| TATDN1 2.39113406821069 2    |   |  | 0.302532359370952  |
| 0.272181725772604            |   |  |                    |
| NDUFB9 7.23037216071817 2    |   |  | 0.0269119169721007 |
| 0.235708400113777            |   |  |                    |
| MTSS1 1.58087574548219 2     |   |  | 0.453646112519871  |
| 1.04689088149086             |   |  |                    |
| SQLI 1.53838559689278 2      |   |  | 0.463386964063625  |
| 0.127293936419303            |   |  |                    |
| WASHC5 7.88735732497892 2    |   |  | 0.0193768027581461 |
| 1.7160463678216              |   |  |                    |
| NSMCE2 2.76415818644068 2    |   |  | 0.251056041159401  |
| 0.33769260596786             |   |  |                    |
| TRIB1 1.24847758998808 2     |   |  | 0.535669027311315  |
| 0.458187945711165            |   |  |                    |
| MYC 6.56379152614294 2       |   |  | 0.037556990121197  |
| 0.786901926244053            |   |  |                    |
| PVT1 5.52724036894591 2      |   |  | 0.0630630547251217 |
| 0.553585920464707            |   |  |                    |
| FAM49B 9.12060380171648 2    |   |  | 0.0104589009155824 |
| 0.15824020801257             |   |  |                    |
| ASAP1 3.07072743197692 2     |   |  | 0.215377340739574  |
| 0.337469818734918            |   |  |                    |
| EFR3A 5.24696461080437 2     |   |  | 0.0725497819331477 |
| 0.254274715712873            |   |  |                    |
| PHF20L1 0.00145185405332475  | 2 |  | 0.999274336394616  |
| 0.00688855396667897          |   |  |                    |
| SLA 7.73951284000007 2       |   |  | 0.0208634507256651 |
| 7.01110873239213             |   |  |                    |
| NDRG1 1.52364333575299 2     |   |  | 0.466815269601342  |
| 16.2947492183047             |   |  |                    |
| ST3GAL1 2.68415839028524 2   |   |  | 0.261301805932315  |
| 0.498323572110445            |   |  |                    |
| ZFAT 3.76497840872509 2      |   |  | 0.152210750142656  |
| 0.441516489463541            |   |  |                    |
| TRAPPC9 1.84784697756251 2   |   |  | 0.396958519444135  |
| 0.717848926064192            |   |  |                    |
| AC107375.1 0.914350073389714 | 2 |  | 0.633069519967861  |
| 0.990999927523433            |   |  |                    |
| CHRA1 1.99120398342761 2     |   |  | 0.369500941073386  |
| 0.14015193813015             |   |  |                    |
| AG02 0.665694020926943       | 2 |  | 0.716879860884218  |
| 0.286817285412608            |   |  |                    |
| PTK2 6.4610751471947 2       |   |  | 0.039536239436218  |
| 0.581330246947972            |   |  |                    |
| DENND3 3.98226755969144 2    |   |  | 0.136540530751985  |

|                             |   |                                    |
|-----------------------------|---|------------------------------------|
| 0.429567343156317           |   |                                    |
| PTP4A3 1.67453641229529 2   |   | 0.432891479913385                  |
| 0.953896938628225           |   |                                    |
| TSNARE1 0.00237121266607663 | 2 | 0.998815096220472                  |
| 0.0459877347162013          |   |                                    |
| JRK 0.137776235643314       | 2 | 0.933431108542008                  |
| 0.185399518626285           |   |                                    |
| THEM6 1.59097152654547 2    |   | 0.451361926614284                  |
| 0.368104151276054           |   |                                    |
| LY6E 4.53102722250603 2     |   | 0.103776719959313                  |
| 0.444961352011221           |   |                                    |
| ZFP41 0.612187002094171     | 2 | 0.736317769754931                  |
| 0.772126732625318           |   |                                    |
| GLI4 0.139435834044156      | 2 | 0.932656869430416                  |
| 0.131183071554378           |   |                                    |
| MINCR 4.00029178222704 2    |   | 0.135315540461626                  |
| 0.799077353989581           |   |                                    |
| ZNF696 0.102745555319334    | 2 | 0.949924493892266                  |
| 0.192365399382373           |   |                                    |
| TOP1MT 0.15386209209493 2   |   | 0.925953699572704                  |
| 0.137902969767839           |   |                                    |
| ZC3H3 3.1026585964751 2     |   | 0.21196602041082 0.674002761157131 |
| GSDMD 2.91315139197122 2    |   | 0.233032885477882                  |
| 0.295840266140686           |   |                                    |
| NAPRT 0.990856662411932     | 2 | 0.609309864964745                  |
| 0.281424400102489           |   |                                    |
| EEF1D 2.30241217692172 2    |   | 0.316255107630402                  |
| 0.0532555339846392          |   |                                    |
| TIGD5 2.62148524230589 2    |   | 0.269619756685929                  |
| 1.98945128274445            |   |                                    |
| PYCR3 0.171444448968025     | 2 | 0.917849151834909                  |
| 0.166422510907326           |   |                                    |
| TSTA3 1.09763868819584 2    |   | 0.57763139185674 0.161170008783671 |
| ZNF623 1.80046763013021 2   |   | 0.406474608741748                  |
| 0.626412826071689           |   |                                    |
| ZNF707 0.337942817912775    | 2 | 0.844533049122097                  |
| 0.344583027214302           |   |                                    |
| SCRIB 0.612689383737684     | 2 | 0.736132836716986                  |
| 0.715981624342199           |   |                                    |
| PUF60 2.99076079681436 2    |   | 0.224163317141143                  |
| 0.187561712216636           |   |                                    |
| PLEC 0.700041621899089      | 2 | 0.704673424643031                  |
| 0.206680697937973           |   |                                    |
| PARP10 3.04792918702886 2   |   | 0.217846499811311                  |
| 0.699009776771661           |   |                                    |
| GRINA 13.5075181541582 2    |   | 0.00116648645634143                |
| 0.392693344216888           |   |                                    |
| EXOSC4 4.27879856857665 2   |   | 0.117725541367214                  |
| 0.368700126885384           |   |                                    |
| GPAA1 0.474467493515912     | 2 | 0.788806885414575                  |

|                             |                      |                   |
|-----------------------------|----------------------|-------------------|
| 0.121452952195743           |                      |                   |
| CYC1 4.44191484242458 2     | 0.108505173923       | 0.126287467536499 |
| SHARPIN 1.18045338958325 2  | 0.554201635868711    |                   |
| 0.180170195326812           |                      |                   |
| MAF1 0.100204392779773      | 2                    | 0.951132217254775 |
| 0.031928401551746           |                      |                   |
| HGH1 0.231354036194165      | 2                    | 0.890762877130585 |
| 0.138072505794736           |                      |                   |
| MROH1 0.0659398533011479    | 2                    | 0.967567657151746 |
| 0.11134954630359            |                      |                   |
| BOP1 1.71293818283712 2     | 0.424658869900528    |                   |
| 0.270528061459292           |                      |                   |
| HSF1 2.63386038723357 2     | 0.26795661561296     | 0.247761613568156 |
| DGAT1 0.0777709266814035    | 2                    | 0.961860871168345 |
| 0.172725951941214           |                      |                   |
| SLC52A2 3.05502773196129 2  | 0.217074673748412    |                   |
| 0.35973763407914            |                      |                   |
| FBXL6 1.02784761760633 2    | 0.598143965631284    |                   |
| 0.47643644128354            |                      |                   |
| ADCK5 0.409374439581953     | 2                    | 0.814902161822545 |
| 0.183931156023849           |                      |                   |
| CPSF1 1.04003858233374 2    | 0.594509079085721    |                   |
| 0.329169772667357           |                      |                   |
| SLC39A4 7.5585375108524 2   | 0.0228393864977038   |                   |
| 0.851055283933784           |                      |                   |
| VPS28 1.70216222272569 2    | 0.426953098500824    |                   |
| 0.12951103958574            |                      |                   |
| CYHR1 0.14268959250609 2    | 0.931140782919139    |                   |
| 0.148218060873718           |                      |                   |
| PPP1R16A 4.27579260277413 2 | 0.117902613878076    |                   |
| 0.894233376388993           |                      |                   |
| MFSD3 2.97336188608203 2    | 0.226121922962964    |                   |
| 0.64507793100263            |                      |                   |
| RECQL4 0.0224430342098558   | 2                    | 0.988841209270532 |
| 0.025089896831941           |                      |                   |
| LRRC14 0.0797819331240256   | 2                    | 0.960894203039335 |
| 0.113693241396472           |                      |                   |
| C8orf82 0.0100892104525199  | 2                    | 0.994968097425753 |
| 0.0267037187946589          |                      |                   |
| ZNF251 2.54644677360409 2   | 0.27992785022033     | 1.23009637027981  |
| ZNF34 0.201193400693886     | 2                    | 0.904297662286927 |
| 0.244743383773525           |                      |                   |
| RPL8 66.151496487366 2      | 4.32986979603811e-15 |                   |
| 0.243880867431342           |                      |                   |
| ZNF7 1.08399120308832 2     | 0.581586478665956    |                   |
| 0.407771461517362           |                      |                   |
| COMMD5 1.36054002818527 2   | 0.506480217104537    |                   |
| 0.229632518197719           |                      |                   |
| ZNF250 0.127649517305328    | 2                    | 0.938169391194343 |
| 0.19291173319895            |                      |                   |

|            |                     |   |                    |
|------------|---------------------|---|--------------------|
| ZNF16      | 0.659733205059219   | 2 | 0.719019642436237  |
|            | 0.21629353230502    |   |                    |
| C8orf33    | 0.483511940164024   | 2 | 0.785247778123639  |
|            | 0.132554627723285   |   |                    |
| WASHC1     | 0.34519297862188    | 2 | 0.841477091349777  |
|            | 0.218486988819299   |   |                    |
| CBWD1      | 3.91935422268256    | 2 | 0.14090390985118   |
| C9orf66    | 4.11035679403513    | 2 | 0.216423607445441  |
|            | 1.10254177472557    |   | 0.128069986235881  |
| DOCK8      | 0.396403302261186   | 2 | 0.820204441307743  |
|            | 0.0942061569379509  |   |                    |
| KANK1      | 9.14836437169384    | 2 | 0.0103147312628036 |
|            | 0.703764437122021   |   |                    |
| SMARCA2    | 7.39982003515497    | 2 | 0.0247257512532385 |
|            | 0.329484595262533   |   |                    |
| PUM3       | 0.128363289637689   | 2 | 0.93783463125624   |
|            | 0.0715721403670535  |   |                    |
| RFX3       | 0.19641611243044    | 2 | 0.906460289436343  |
|            | 0.267916535141162   |   |                    |
| RFX3-AS1   | 0.324026724518288   | 2 | 0.850429840800394  |
|            | 0.569232152751199   |   |                    |
| SLC1A1     | 0.969175432078244   | 2 | 0.615951091177969  |
|            | 0.402720025050412   |   |                    |
| SPATA6L    | 0.0772466038721836  | 2 | 0.962113067021935  |
|            | 0.242225159279904   |   |                    |
| PLPP6      | 2.48940143515213    | 2 | 0.288027096680421  |
|            | 1.29579132361345    |   |                    |
| CDC37L1-DT | 4.24305733923949    | 2 | 0.11984827998291   |
|            | 1.19961285027729    |   |                    |
| CDC37L1    | 0.445734491627283   | 2 | 0.800221074941159  |
|            | 0.233059276295153   |   |                    |
| AK3        | 1.09114045099995    | 2 | 0.579511237020963  |
|            | 0.113147122458825   |   |                    |
| RCL1       | 0.648776520558999   | 2 | 0.72296948754509   |
|            | 0.231881718341472   |   |                    |
| JAK2       | 1.36855700113443    | 2 | 0.504454061626062  |
|            | 0.474023145539737   |   |                    |
| RLN2       | 0.496470457172086   | 2 | 0.780176401899908  |
|            | 0.446128146572665   |   |                    |
| PLGRKT     | 6.24468130293595    | 2 | 0.044053932745109  |
|            | 0.864689033801941   |   |                    |
| RIC1       | 1.04566471195168    | 2 | 0.592839036586922  |
|            | 0.473268965927634   |   |                    |
| KIAA2026   | 0.00512292204190204 | 2 | 0.99744181672113   |
|            | 0.0147421921037955  |   |                    |
| RANBP6     | 7.55140978390131    | 2 | 0.0229209281684319 |
|            | 0.764430660342441   |   |                    |
| UHRF2      | 4.04708861783899    | 2 | 0.132186125365812  |
|            | 0.23069494411759    |   |                    |
| AL354707.1 | 1.00675844082206    | 2 | 0.604484518056339  |

|                              |   |                      |
|------------------------------|---|----------------------|
| 0.463919239479554            |   |                      |
| KDM4C 1.52087905682855 2     |   | 0.467460919493341    |
| 0.451051097612915            |   |                      |
| DMAC1 0.825188113806594      | 2 | 0.661930934588886    |
| 0.080924642846435            |   |                      |
| AL159169.2 0.219382290861915 | 2 | 0.89611086049404     |
| 0.472789350994978            |   |                      |
| ZDHHC21 0.00239832765316236  | 2 | 0.998801554883048    |
| 0.011861473289668            |   |                      |
| SNAPC3 2.21155836907812 2    |   | 0.330952908361052    |
| 0.398458616656848            |   |                      |
| PSIP1 4.07732148345217 2     |   | 0.130202969567966    |
| 0.180034302497573            |   |                      |
| CCDC171 0.825432691284679    | 2 | 0.661849992838795    |
| 0.404178475493863            |   |                      |
| CNTLN 0.427892443923081      | 2 | 0.807391803802659    |
| 0.325921782584736            |   |                      |
| RRAGA 0.0246367118422797     | 2 | 0.987757204447094    |
| 0.0207263997605802           |   |                      |
| HAUS6 0.697830472506797      | 2 | 0.705452924568662    |
| 0.321124764317233            |   |                      |
| PLIN2 7.19791087556784 2     |   | 0.0273522786871518   |
| 0.386463351217435            |   |                      |
| DENND4C 0.00724944198863825  | 2 | 0.996381840376717    |
| 0.0587227962189078           |   |                      |
| RPS6 73.8130662016702 2      |   | 1.11022302462516e-16 |
| 0.279730420267884            |   |                      |
| FOCAD 3.78734594443546 2     |   | 0.150517944067257    |
| 7.63659745122253             |   |                      |
| HACD4 6.84924332854845 2     |   | 0.032561597874762    |
| 0.587385280063322            |   |                      |
| KLHL9 1.20834329124647 2     |   | 0.546526957183008    |
| 0.325957688686988            |   |                      |
| MTAP 0.870920220442962       | 2 | 0.646966922491625    |
| 0.162508882368714            |   |                      |
| CDKN2A 5.26930430638707 2    |   | 0.0717439209624702   |
| 1.08700206299648             |   |                      |
| TUSC1 1.03227972507279 2     |   | 0.596819914089774    |
| 0.598271747545996            |   |                      |
| CAAP1 0.176983758761858      | 2 | 0.915310543594074    |
| 0.0998842448490695           |   |                      |
| PLAA 1.03457751815271 2      |   | 0.596134623494876    |
| 0.300478357144733            |   |                      |
| IFT74 3.21699116948008 2     |   | 0.200188554364859    |
| 0.789946083667731            |   |                      |
| C9orf72 1.1028920720819 2    |   | 0.576116123077073    |
| 0.468272906471838            |   |                      |
| AC01 0.795896722004175       | 2 | 0.671696712511592    |
| 0.625638891289125            |   |                      |
| DDX58 0.0269587390011762     | 2 | 0.986611070386882    |

|                              |   |  |                                    |
|------------------------------|---|--|------------------------------------|
| 0.079722509161307            |   |  |                                    |
| TOPORS 0.838447690535531     | 2 |  | 0.657556987772582                  |
| 0.192868688529496            |   |  |                                    |
| SMIM27 1.6935381842873       | 2 |  | 0.42879810345691 0.177391985079411 |
| NDUFB6 2.5530856337114       | 2 |  | 0.279000189805179                  |
| 0.0986418758073277           |   |  |                                    |
| APTX 0.00991423147900607     | 2 |  | 0.995055150481995                  |
| 0.025837240619471            |   |  |                                    |
| DNAJA1 1.52614746400626      | 2 |  | 0.466231152700726                  |
| 0.118396923805683            |   |  |                                    |
| SMU1 7.61637715676042        | 2 |  | 0.0221883350060266                 |
| 0.589769902462743            |   |  |                                    |
| B4GALT1 3.33425402019016     | 2 |  | 0.188788675204825                  |
| 0.667217655898749            |   |  |                                    |
| B4GALT1-AS1 1.89269018005159 | 2 |  | 0.388157113342701                  |
| 1.45058039186138             |   |  |                                    |
| BAG1 4.89131309757163        | 2 |  | 0.0866692136509968                 |
| 0.323892954124345            |   |  |                                    |
| CHMP5 0.807092774756878      | 2 |  | 0.667947041768134                  |
| 0.070446844697268            |   |  |                                    |
| NFX1 2.96843448032133        | 2 |  | 0.226679707020835                  |
| 0.314115384486404            |   |  |                                    |
| AQP3 0.279499447963711       | 2 |  | 0.869575842146042                  |
| 0.435980556748731            |   |  |                                    |
| NOL6 0.350778879214266       | 2 |  | 0.839130166605943                  |
| 0.553014867267796            |   |  |                                    |
| UBE2R2 11.042481067804       | 2 |  | 0.00400088163298629                |
| 0.303922622597736            |   |  |                                    |
| UBAP2 0.37064410675434       | 2 |  | 0.830836667006498                  |
| 0.131893499772924            |   |  |                                    |
| DCAF12 4.51407898780777      | 2 |  | 0.104659872747562                  |
| 0.337677084969831            |   |  |                                    |
| UBAP1 0.870587139525868      | 2 |  | 0.647074677632108                  |
| 0.180200119459397            |   |  |                                    |
| NUDT2 0.00441060119285192    | 2 |  | 0.997797129292394                  |
| 0.0228883662022893           |   |  |                                    |
| FAM219A 0.895259661594236    | 2 |  | 0.639141230647957                  |
| 0.661903311912887            |   |  |                                    |
| RPP25L 3.68198747086668      | 2 |  | 0.158659681994105                  |
| 0.389891289415233            |   |  |                                    |
| DCTN3 4.34449523564816       | 2 |  | 0.113921277448443                  |
| 0.238611213534491            |   |  |                                    |
| SIGMAR1 0.695830434340704    | 2 |  | 0.706158743812958                  |
| 0.252335759755799            |   |  |                                    |
| GALT 1.82597822762618        | 2 |  | 0.401322829762099                  |
| 0.358609183661781            |   |  |                                    |
| IL11RA 3.69561876854771      | 2 |  | 0.157581990073169                  |
| 2.43059975299924             |   |  |                                    |
| AL162231.1 0.299797717193443 | 2 |  | 0.860795034040097                  |
| 0.326110541699401            |   |  |                                    |



|            |                     |   |                      |
|------------|---------------------|---|----------------------|
| DNAJB5     | 0.568734973392838   | 2 | 0.752490063801773    |
|            | 0.744618818841364   |   |                      |
| VCP        | 23.6323037498963    | 2 | 7.38431889091284e-06 |
|            | 0.276538477930721   |   |                      |
| FANCG      | 0.0531964247006651  | 2 | 0.973752404626836    |
|            | 0.147774091669616   |   |                      |
| PIGO       | 2.50649577138209    | 2 | 0.285575771530761    |
|            | 0.815304157347466   |   |                      |
| STOML2     | 0.845479865289429   | 2 | 0.655249019834476    |
|            | 0.102581808890196   |   |                      |
| FAM214B    | 1.25466183320928    | 2 | 0.534015231722068    |
|            | 1.02096876080306    |   |                      |
| TESK1      | 1.66168325094519    | 2 | 0.435682450525689    |
|            | 0.608816966506613   |   |                      |
| CD72       | 14.1044038527199    | 2 | 0.000865501087923826 |
|            | 0.685294839451415   |   |                      |
| SIT1       | 0.00720690952227961 | 2 | 0.99640302989058     |
|            | 0.00658305737226898 |   |                      |
| CCDC107    | 3.82987474113083    | 2 | 0.147351060810804    |
|            | 0.280920516179109   |   |                      |
| TLN1       | 0.273346379730102   | 2 | 0.872255241409787    |
|            | 0.0641796144701738  |   |                      |
| CREB3      | 0.549904114735874   | 2 | 0.759608539984748    |
|            | 0.172553369767219   |   |                      |
| GBA2       | 5.51723305772694    | 2 | 0.0633793912922694   |
|            | 0.934214635390799   |   |                      |
| RGP1       | 0.10595713535664    | 2 | 0.948400338685619    |
|            | 0.0997480892516889  |   |                      |
| MSMP       | 6.17045872753748    | 2 | 0.045719546290083    |
|            | 1.63107333607811    |   |                      |
| AL133410.1 | 0.147646634842881   | 2 | 0.928835788446693    |
|            | 0.312982765566849   |   |                      |
| HINT2      | 2.8067813228249     | 2 | 0.245762253042254    |
|            | 0.256053355852367   |   |                      |
| RECK       | 1.65784848906779    | 2 | 0.436518621124266    |
|            | 1.17089137173833    |   |                      |
| GLIPR2     | 4.10718446367087    | 2 | 0.128273287581058    |
|            | 2.25769498623612    |   |                      |
| CLTA       | 3.66336972516144    | 2 | 0.160143520517531    |
|            | 0.0890316767799801  |   |                      |
| GNE        | 0.045294823033965   | 2 | 0.977607116023051    |
|            | 0.186259447644066   |   |                      |
| RNF38      | 0.113914122142306   | 2 | 0.944634630094868    |
|            | 0.179046632055939   |   |                      |
| PAX5       | 2.89710615243611    | 2 | 0.234909939087471    |
|            | 0.211500459784598   |   |                      |
| AL161781.2 | 0.498277328366661   | 2 | 0.77947188105879     |
|            | 0.213119449020905   |   |                      |
| EBLN3P     | 3.05376202245349    | 2 | 0.217212093966578    |
|            | 0.233242249179793   |   |                      |

|            |                     |   |                      |
|------------|---------------------|---|----------------------|
| ZCCHC7     | 18.6212403414766    | 2 | 9.04584281061771e-05 |
|            | 0.256638302190424   |   |                      |
| GRHPR      | 27.2068793714234    | 2 | 1.23623549674878e-06 |
|            | 0.275215360715562   |   |                      |
| ZBTB5      | 3.46809687096173    | 2 | 0.176568136346427    |
|            | 1.10327682924142    |   |                      |
| POLR1E     | 0.00293730248175729 | 2 | 0.998532426699584    |
|            | 0.0199497584788272  |   |                      |
| FBX010     | 0.65704689080159    | 2 | 0.719986047666481    |
|            | 0.362742426810726   |   |                      |
| TOMM5      | 3.88595824095184    | 2 | 0.14327647546335     |
| TRMT10B    | 1.3584722720578     | 2 | 0.447163219580748    |
|            | 0.239644594988741   |   | 0.507004126673356    |
| EXOSC3     | 7.21387696865926    | 2 | 0.0271347934257525   |
|            | 0.347214938431325   |   |                      |
| DCAF10     | 0.0290819473177499  | 2 | 0.985564235732274    |
|            | 0.0516542380381388  |   |                      |
| SLC25A51   | 0.717576869665129   | 2 | 0.698522118668807    |
|            | 0.601170268818502   |   |                      |
| ALDH1B1    | 0.00565527397116844 | 2 | 0.997176357014463    |
|            | 0.0625639572817722  |   |                      |
| CBWD6      | 2.6765067190002     | 2 | 0.262303418475671    |
|            | 0.881646582199083   |   |                      |
| AL845472.1 | 3.59430963134625    | 2 | 0.165769863715937    |
|            | 1.24602626787105    |   |                      |
| AL590399.3 | 0.700144355749368   | 2 | 0.704637228665626    |
|            | 0.769760920870447   |   |                      |
| AL590399.1 | 0.0094126628824073  | 2 | 0.995304725983178    |
|            | 0.0488153667922624  |   |                      |
| LINC01410  | 2.80807144783235    | 2 | 0.245603772148523    |
|            | 0.684851212823427   |   |                      |
| AL512625.1 | 0.159177381775285   | 2 | 0.923496110646567    |
|            | 0.142406206774187   |   |                      |
| CBWD5      | 4.2866245925678     | 2 | 0.117265780024127    |
|            | 0.350665038102417   |   |                      |
| CBWD3      | 0.540530287846264   | 2 | 0.7631771157338      |
|            | 0.18796699028869    |   |                      |
| AL161457.2 | 0.19050988643037    | 2 | 0.909141125558826    |
|            | 0.297726227506996   |   |                      |
| FAM122A    | 3.94792428705128    | 2 | 0.138905401328218    |
|            | 0.477148899934906   |   |                      |
| FXN        | 0.24021324998766    | 2 | 0.886825873872536    |
|            | 0.175232917441339   |   |                      |
| PTAR1      | 0.890275832314492   | 2 | 0.640735902104935    |
|            | 0.28893335965129    |   |                      |
| SMC5       | 3.0289454906239     | 2 | 0.219924110302129    |
|            | 0.310420170350937   |   |                      |
| ABHD17B    | 4.9869100422557     | 2 | 0.0826240051747504   |
|            | 0.719511403694659   |   |                      |
| C9orf85    | 0.526435984091369   | 2 | 0.768574335956547    |

|                            |   |                                    |
|----------------------------|---|------------------------------------|
| 0.222282795117667          |   |                                    |
| ZFAND5 1.88598086828674 2  |   | 0.389461433435613                  |
| 0.266401945812794          |   |                                    |
| C9orf40 4.12784328800339 2 |   | 0.126955119594265                  |
| 1.01529337550061           |   |                                    |
| CARNMT1 0.0633302918438531 | 2 | 0.9688309447619                    |
| 0.135998080268892          |   |                                    |
| NMRK1 3.94754980389107 2   |   | 0.138931412630171                  |
| 0.914956194710861          |   |                                    |
| OSTF1 0.590604410804033    | 2 | 0.74430661999311                   |
| 0.0732210368996217         |   |                                    |
| RFK 0.564782036608202      | 2 | 0.753978807371076                  |
| 0.0923767442058329         |   |                                    |
| GCNT1 5.60270082335234 2   |   | 0.0607279994286406                 |
| 0.910590705667509          |   |                                    |
| VPS13A 2.46388911789883 2  |   | 0.291724749799404                  |
| 0.293210623876227          |   |                                    |
| CEP78 1.65553313887638 2   |   | 0.437024260487329                  |
| 0.690488957188242          |   |                                    |
| PSAT1 2.49500817729611 2   |   | 0.287220780579317                  |
| 0.520445490204168          |   |                                    |
| TLE4 7.6021882757418 2     |   | 0.0223463085330411                 |
| 0.508958455901694          |   |                                    |
| TLE1 0.865324957088015     | 2 | 0.648779431832869                  |
| 0.469072075503619          |   |                                    |
| IDNK 1.03310321655141 2    |   | 0.596574226616871                  |
| 0.447683380461762          |   |                                    |
| UBQLN1 7.86014885413285 2  |   | 0.019642210586549                  |
| 0.413672882691955          |   |                                    |
| GKAP1 0.912854177963406    | 2 | 0.633543199989451                  |
| 0.312534407778223          |   |                                    |
| KIF27 0.0475715536276763   | 2 | 0.976494875196501                  |
| 0.135275802726353          |   |                                    |
| C9orf64 0.141417656431026  | 2 | 0.931733147037876                  |
| 0.16636146068917           |   |                                    |
| HNRNPK 19.0020676709044 2  |   | 7.47744853999421e-05               |
| 0.200683534285019          |   |                                    |
| RMI1 1.54397155806516 2    |   | 0.462094538968358                  |
| 0.321443449979859          |   |                                    |
| AGTPBP1 0.321595513465802  | 2 | 0.85146425660796                   |
| 0.385097320789595          |   |                                    |
| NAA35 4.00884891806788 2   |   | 0.134737820519396                  |
| 0.738558027528994          |   |                                    |
| ISCA1 0.32960874611871 2   |   | 0.8480595911647 0.146179253392812  |
| TUT7 3.70840488461339 2    |   | 0.15657777269598 0.360938305729885 |
| SPIN1 0.305098395714863    | 2 | 0.858516655737357                  |
| 0.279576497861865          |   |                                    |
| CKS2 1.38810537412656 2    |   | 0.499547451671983                  |
| 0.162854553983296          |   |                                    |
| SECISBP2 0.484334928880495 | 2 | 0.784924719566069                  |

|                               |                                     |  |
|-------------------------------|-------------------------------------|--|
| 0.111585962050111             |                                     |  |
| SEMA4D 3.3946582827706 2      | 0.183172098082356                   |  |
| 0.332071923698455             |                                     |  |
| GADD45G 12.5853009960502 2    | 0.00184985041850116                 |  |
| 9.06575254987798              |                                     |  |
| SYK 2.97618538414079 2        | 0.225802920786188                   |  |
| 0.189158479847103             |                                     |  |
| AUH 0.0999738895154847        | 2 0.951241843112357                 |  |
| 0.113987531865593             |                                     |  |
| SPTLC1 1.56021492118336 2     | 0.458356753370709                   |  |
| 0.16187719495938              |                                     |  |
| IARS 14.2755579931578 2       | 0.00079451475829917                 |  |
| 1.14558386703971              |                                     |  |
| NOL8 0.15087675099551 2       | 0.92733687544658 0.0728150477803775 |  |
| CENPP 2.89977700202537 2      | 0.23459644390152 1.01316149469004   |  |
| IPPK 4.12441945113755 2       | 0.127172642541299                   |  |
| 1.12339214442115              |                                     |  |
| BICD2 0.146015027791907       | 2 0.92959384512812                  |  |
| 0.120919594121616             |                                     |  |
| FGD3 0.83324004832861 2       | 0.659271379550202                   |  |
| 0.234576352585215             |                                     |  |
| SUSD3 26.7567403449083 2      | 1.5482734169181e-06                 |  |
| 0.405080636938085             |                                     |  |
| CARD19 0.941261383192558      | 2 0.624608208882478                 |  |
| 0.122071667913156             |                                     |  |
| NINJ1 0.148893479788436       | 2 0.928256911803757                 |  |
| 0.103278469551599             |                                     |  |
| WNK2 4.5298211217225 2        | 0.103839321424962                   |  |
| 1.92862426198984              |                                     |  |
| FAM120A0S 4.31623181791394 2  | 0.115542608884762                   |  |
| 0.376114898756266             |                                     |  |
| FAM120A 1.19684294417183 2    | 0.549678634691891                   |  |
| 0.239792345265122             |                                     |  |
| AL158152.1 1.84584914822519 2 | 0.39735524524668                    |  |
| 1.49472140692802              |                                     |  |
| ZNF169 5.33086277913369 2     | 0.0695693355734783                  |  |
| 1.45534645326521              |                                     |  |
| AL691447.2 2.66845501316783 2 | 0.263361541953484                   |  |
| 1.3254497594695               |                                     |  |
| MFSD14B 0.137025416024742     | 2 0.93378159352008                  |  |
| 0.126350758631134             |                                     |  |
| C9orf3 1.90911455064862 2     | 0.384982548103023                   |  |
| 0.366772822517708             |                                     |  |
| FANCC 3.15518330540653 2      | 0.206471755597527                   |  |
| 4.50257195648215              |                                     |  |
| AL161729.1 0.0588125852590267 | 2 0.971021865283702                 |  |
| 0.253576210324679             |                                     |  |
| LINC00476 1.79376381311608 2  | 0.407839360424301                   |  |
| 0.375875381639136             |                                     |  |
| ERCC6L2 0.290714813298379     | 2 0.864713183633668                 |  |

|                    |                     |   |                                   |
|--------------------|---------------------|---|-----------------------------------|
| 0.217642973442956  |                     |   |                                   |
| SLC35D2            | 3.05375483049448    | 2 | 0.21721287505822 1.23383617701186 |
| HABP4              | 4.59925250365553    | 2 | 0.100296322285732                 |
| 0.914655387533997  |                     |   |                                   |
| AAED1              | 4.80921863166459    | 2 | 0.0903007677995037                |
| 0.936963236987245  |                     |   |                                   |
| ZNF510             | 0.146556484079765   | 2 | 0.929342211975445                 |
| 0.349890491089153  |                     |   |                                   |
| ZNF782             | 0.0095555851642201  | 2 | 0.995233602913208                 |
| 0.0861096532393756 |                     |   |                                   |
| MFSD14C            | 0.20964436882882    | 2 | 0.900484628552716                 |
| 0.145495735513079  |                     |   |                                   |
| TDRD7              | 2.67999722897311    | 2 | 0.261846031371271                 |
| 0.927864297056818  |                     |   |                                   |
| TSTD2              | 0.251918247611398   | 2 | 0.881650884579731                 |
| 0.250767626215418  |                     |   |                                   |
| NCBP1              | 0.161652313856098   | 2 | 0.922354022364668                 |
| 0.148817471609191  |                     |   |                                   |
| XPA                | 9.10411331968219    | 2 | 0.0105454935724935                |
| 0.525004223194511  |                     |   |                                   |
| TRMO               | 10.8898666227091    | 2 | 0.00431812796813624               |
| 1.00609895706892   |                     |   |                                   |
| ANP32B             | 46.8552527833089    | 2 | 6.69131416941582e-11              |
| 0.493765311708933  |                     |   |                                   |
| NANS               | 68.3105226556534    | 2 | 1.4432899320127e-15               |
| 0.758380239165309  |                     |   |                                   |
| TRIM14             | 5.35056384977202    | 2 | 0.0688874045830788                |
| 0.77159792929566   |                     |   |                                   |
| COR02A             | 0.137076941005196   | 2 | 0.933757537290778                 |
| 0.286819878471178  |                     |   |                                   |
| TBC1D2             | 0.782180511807895   | 2 | 0.676319111491751                 |
| 0.507716411545051  |                     |   |                                   |
| TGFBR1             | 5.7526101674458     | 2 | 0.05634255974272 2.32717446766842 |
| ALG2               | 8.73422908956318    | 2 | 0.0126877978729906                |
| 0.412477185958901  |                     |   |                                   |
| SEC61B             | 25.0904568960729    | 2 | 3.56185725591818e-06              |
| 0.209081378013664  |                     |   |                                   |
| STX17              | 0.736574629385849   | 2 | 0.691918354817514                 |
| 0.278255335035218  |                     |   |                                   |
| ERP44              | 45.7768903624239    | 2 | 1.14729337141739e-10              |
| 0.814911868425651  |                     |   |                                   |
| INVS               | 0.00110025681464532 | 2 | 0.999450022885565                 |
| 0.0221765595221462 |                     |   |                                   |
| TEX10              | 1.08690971709029    | 2 | 0.580738413448328                 |
| 0.291626707538409  |                     |   |                                   |
| MSANTD3            | 0.616258243133003   | 2 | 0.734820430718091                 |
| 0.491638321313856  |                     |   |                                   |
| MRPL50             | 3.34201842655005    | 2 | 0.188057180034772                 |
| 0.278281174474748  |                     |   |                                   |
| ZNF189             | 3.06751527495245    | 2 | 0.215723531588985                 |

|                    |                    |   |                      |
|--------------------|--------------------|---|----------------------|
| 0.414162633676377  |                    |   |                      |
| RNF20              | 0.262309435890138  | 2 | 0.877082063558333    |
| 0.132313588733852  |                    |   |                      |
| SMC2               | 0.424716981749897  | 2 | 0.808674743080391    |
| 0.171671298317056  |                    |   |                      |
| NIPSNAP3A          | 11.572788623039    | 2 | 0.00306902820984067  |
| 0.906534126028453  |                    |   |                      |
| NIPSNAP3B          | 1.79551400941635   | 2 | 0.407482617069932    |
| 1.18285791472249   |                    |   |                      |
| ABCA1              | 0.613851567732868  | 2 | 0.735705200076553    |
| 0.539854408401493  |                    |   |                      |
| SLC44A1            | 0.451969806981664  | 2 | 0.797730144515212    |
| 0.250364792556589  |                    |   |                      |
| FSD1L              | 0.604192734154254  | 2 | 0.739266820474073    |
| 0.524735292479107  |                    |   |                      |
| FKTN               | 0.173681926431366  | 2 | 0.916822892603932    |
| 0.340860644134474  |                    |   |                      |
| TMEM38B            | 5.54919195589481   | 2 | 0.0623746723426807   |
| 1.53034937413539   |                    |   |                      |
| RAD23B             | 1.1441591704644    | 2 | 0.564350602358334    |
| 0.0762994994843117 |                    |   |                      |
| KLF4               | 1.15286021295005   | 2 | 0.561900716079613    |
| 1.06125288174803   |                    |   |                      |
| ELP1               | 1.2808679907987    | 2 | 0.527063631208012    |
| 0.78395801897396   |                    |   |                      |
| FAM206A            | 8.11153778633268   | 2 | 0.017322156174244    |
| 1.35506241807324   |                    |   |                      |
| CTNNAL1            | 0.0497970760092937 | 2 | 0.975408873938446    |
| 0.114886383036321  |                    |   |                      |
| TMEM245            | 1.93521187755815   | 2 | 0.37999167333463     |
| AKAP2              | 1.01564903304357   | 2 | 0.564146806604974    |
| 0.928938330967549  |                    |   | 0.601803369044949    |
| TXN                | 14.5517256241361   | 2 | 0.000692042760193856 |
| 0.556799708110784  |                    |   |                      |
| ECPAS              | 5.23793136497378   | 2 | 0.0728782030596067   |
| 2.14666892608459   |                    |   |                      |
| DNAJC25            | 3.35487450315365   | 2 | 0.186852218198049    |
| 1.18159820094838   |                    |   |                      |
| GNG10              | 0.3757120515882    | 2 | 0.828734014965564    |
| 0.307553499054042  |                    |   |                      |
| UGCG               | 12.1459836520297   | 2 | 0.00230426891584024  |
| 0.695701234563884  |                    |   |                      |
| SUSD1              | 3.97247289045565   | 2 | 0.137210855482487    |
| 4.7798444849231    |                    |   |                      |
| PTBP3              | 10.5202502777185   | 2 | 0.00519465462487623  |
| 0.825191883010205  |                    |   |                      |
| HSDL2              | 2.86568100997435   | 2 | 0.238630128571453    |
| 0.358013591224557  |                    |   |                      |
| INIP               | 0.131159961496252  | 2 | 0.936524139862769    |
| 0.0483497090790484 |                    |   |                      |

|            |                      |   |                     |
|------------|----------------------|---|---------------------|
| SNX30      | 0.00319120213758069  | 2 | 0.998405671225813   |
|            | 0.0324155059606248   |   |                     |
| FKBP15     | 0.0550085786905777   | 2 | 0.972870509566967   |
|            | 0.0692013039428845   |   |                     |
| SLC31A1    | 0.0421072395448825   | 2 | 0.979166460479051   |
|            | 0.0851470648599597   |   |                     |
| CDC26      | 0.415560015036565    | 2 | 0.812385735809122   |
|            | 0.0780592025007578   |   |                     |
| PRPF4      | 0.465986909353992    | 2 | 0.79215875844229    |
|            | 0.102751875095649    |   |                     |
| HDHD3      | 0.349867600854417    | 2 | 0.839512594304811   |
|            | 0.204824940754356    |   |                     |
| ALAD       | 1.00566763649008     | 2 | 0.604814295144186   |
|            | 0.383375746644435    |   |                     |
| POLE3      | 0.934325873258703    | 2 | 0.6267779570043     |
|            | 0.150908491941461    |   |                     |
| RGS3       | 2.25702123129064     | 2 | 0.323514735565157   |
|            | 0.40521473618757     |   |                     |
| AKNA       | 1.86857187052664     | 2 | 0.39286629736554    |
| ATP6V1G1   | 48.5834217259766     | 2 | 0.184693657589893   |
|            | 0.481287107490596    |   | 2.8199664825479e-11 |
| TMEM268    | 0.582912416167758    | 2 | 0.74717473309978    |
|            | 0.501224813422987    |   |                     |
| TNFSF8     | 0.832813701553281    | 2 | 0.659411933644236   |
|            | 0.488498797677449    |   |                     |
| TRIM32     | 3.36201674078266     | 2 | 0.186186136761956   |
|            | 0.808688704310949    |   |                     |
| CDK5RAP2   | 3.89485233317749     | 2 | 0.142640733005808   |
|            | 0.663195843924367    |   |                     |
| MEGF9      | 0.258884656175257    | 2 | 0.878585256647098   |
|            | 0.226214130504247    |   |                     |
| FBXW2      | 0.000287973617084783 | 2 | 0.999856023557061   |
|            | 0.00318191229596674  |   |                     |
| B3GNT10    | 1.97128060726264     | 2 | 0.373200188980178   |
|            | 1.75365701166499     |   |                     |
| PSMD5      | 7.20021666771328     | 2 | 0.027320762523395   |
|            | 0.444907719841945    |   |                     |
| PHF19      | 13.6121526311873     | 2 | 0.00110702801815044 |
|            | 1.07960639895806     |   |                     |
| TRAF1      | 2.22453718233613     | 2 | 0.328812173924383   |
|            | 0.597387133633149    |   |                     |
| CNTRL      | 3.95229466656502     | 2 | 0.138602198067044   |
|            | 0.221390711799592    |   |                     |
| RAB14      | 0.0934912953244261   | 2 | 0.954330102815414   |
|            | 0.0360007244084854   |   |                     |
| GSN        | 7.55248989730545     | 2 | 0.0229085529095285  |
|            | 0.670837434809243    |   |                     |
| STOM       | 0.185522783023136    | 2 | 0.911410944740929   |
|            | 0.319034473246328    |   |                     |
| AL359644.1 | 0.199306379229893    | 2 | 0.905151279471376   |

|                            |   |                      |                   |
|----------------------------|---|----------------------|-------------------|
| 0.445030020071845          |   |                      |                   |
| TLL11 0.311890900255004    | 2 | 0.85560586228873     |                   |
| 0.365798509929727          |   |                      |                   |
| NDUFA8 2.47730640219991 2  |   | 0.289774222855606    |                   |
| 0.178875168171581          |   |                      |                   |
| RBM18 0.350297659241128    | 2 | 0.839332093995959    |                   |
| 0.144596967555703          |   |                      |                   |
| MRRF 0.583201818775253     | 2 | 0.747066623763743    |                   |
| 0.105407910515386          |   |                      |                   |
| PTGS1 3.07871232996632 2   |   | 0.214519171929568    |                   |
| 1.30788774371454           |   |                      |                   |
| PDCL 0.000769769653875213  | 2 | 0.999615189231726    |                   |
| 0.00650817173665824        |   |                      |                   |
| RC3H2 5.6875299028468 2    |   | 0.058206109738875    |                   |
| 0.668546975619678          |   |                      |                   |
| ZBTB6 1.73667472714533 2   |   | 0.419648692742195    |                   |
| 0.994888997695704          |   |                      |                   |
| ZBTB26 1.12691110492925 2  |   | 0.569238627394411    |                   |
| 0.299919841712361          |   |                      |                   |
| RABGAP1 3.06799213006424 2 |   | 0.215672103285805    |                   |
| 0.44215125724957           |   |                      |                   |
| STRBP 4.46588637009464 2   |   | 0.107212419335305    |                   |
| 0.150445602575108          |   |                      |                   |
| CRB2 3.93769908671986 2    |   | 0.139617387605783    |                   |
| 1.89076840315354           |   |                      |                   |
| DENND1A 0.785480855448997  | 2 | 0.675203989077105    |                   |
| 0.734504533068719          |   |                      |                   |
| NEK6 5.82634800063656 2    |   | 0.0543030979969837   |                   |
| 0.357178470138453          |   |                      |                   |
| PSMB7 13.2959650742832 2   |   | 0.00129663538220959  |                   |
| 0.31544940432782           |   |                      |                   |
| NR6A1 0.2304905798151 2    |   | 0.891147527601082    |                   |
| 0.319496001410155          |   |                      |                   |
| RPL35 25.722291466925 2    |   | 2.59702049509869e-06 |                   |
| 0.192667130467918          |   |                      |                   |
| ARPC5L 21.702465509783 2   |   | 1.93807015029801e-05 |                   |
| 0.555834485009155          |   |                      |                   |
| GOLGA1 0.0289939642295713  | 2 | 0.985607593178477    |                   |
| 0.0925907207866512         |   |                      |                   |
| SCAI 0.228059553886022     | 2 | 0.892231387563669    |                   |
| 0.198559968021742          |   |                      |                   |
| PPP6C 4.72812460934761 2   |   | 0.0940374375047662   |                   |
| 0.289253328102252          |   |                      |                   |
| RABEPK 0.00118587476772176 | 2 | 0.999407238368771    |                   |
| 0.0162997693100817         |   |                      |                   |
| HSPA5 11.028467281165 2    |   | 0.00402901382831899  |                   |
| 0.252179077110633          |   |                      |                   |
| GAPVD1 1.13831211260204 2  |   | 0.566002911782       | 0.180480387209029 |
| MAPKAP1 2.64265484913523 2 |   | 0.266780935252719    |                   |
| 0.356326004521582          |   |                      |                   |



|            |                    |   |                      |
|------------|--------------------|---|----------------------|
| PBX3       | 1.36096914710316   | 2 | 0.506371558640458    |
|            | 0.720772720505822  |   |                      |
| ZBTB43     | 5.56946777932357   | 2 | 0.0617455179655764   |
|            | 0.664561968903404  |   |                      |
| RALGPS1    | 5.23553581270254   | 2 | 0.0729655471309181   |
|            | 1.17601628052989   |   |                      |
| SLC2A8     | 2.90076807939582   | 2 | 0.234480221086979    |
|            | 0.590861200911062  |   |                      |
| RPL12      | 52.4218162249351   | 2 | 4.13757916817303e-12 |
|            | 0.18795693956035   |   |                      |
| LRSAM1     | 3.02732993746815   | 2 | 0.220101831617234    |
|            | 0.976695145080707  |   |                      |
| PTRH1      | 2.29409609413045   | 2 | 0.317572847168718    |
|            | 0.549086368797253  |   |                      |
| TOR2A      | 1.79141226415983   | 2 | 0.408319169553851    |
|            | 0.16353109125427   |   |                      |
| SH2D3C     | 0.0218721768468187 | 2 | 0.989123493197174    |
|            | 0.0526547853666895 |   |                      |
| CDK9       | 0.839824742169378  | 2 | 0.657104398637934    |
|            | 0.193719576043879  |   |                      |
| FPGS       | 0.33530837701191   | 2 | 0.845646218309123    |
|            | 0.123478969820979  |   |                      |
| ENG        | 0.838863368109937  | 2 | 0.657420336126975    |
|            | 0.673221066260311  |   |                      |
| ST6GALNAC4 | 7.50505913602743   | 2 | 0.023458331296603    |
|            | 0.32228322946497   |   |                      |
| DPM2       | 0.54863981115352   | 2 | 0.7600888796917      |
|            | 0.15546251310496   |   |                      |
| FAM102A    | 3.49597802757886   | 2 | 0.174123752066745    |
|            | 0.375476128353966  |   |                      |
| NAIF1      | 0.303964911455528  | 2 | 0.859003351197568    |
|            | 0.132763355958455  |   |                      |
| SLC25A25   | 1.93466801160643   | 2 | 0.380095019652161    |
|            | 0.861651193476137  |   |                      |
| PTGES2     | 0.440234280024767  | 2 | 0.802424796406326    |
|            | 0.144857566273276  |   |                      |
| C9orf16    | 2.43146335528539   | 2 | 0.296492997613032    |
|            | 0.187919477529983  |   |                      |
| CIZ1       | 0.225704725179773  | 2 | 0.89328253230071     |
|            | 0.134808416038625  |   |                      |
| GOLGA2     | 2.18339320951115   | 2 | 0.335646550825223    |
|            | 0.409811084122574  |   |                      |
| SWI5       | 2.91365326251108   | 2 | 0.232974416644115    |
|            | 0.404760284570457  |   |                      |
| TRUB2      | 0.144792799449867  | 2 | 0.93016210671884     |
|            | 0.0738778089921891 |   |                      |
| COQ4       | 0.23188891062064   | 2 | 0.890524685841096    |
|            | 0.0999432195198631 |   |                      |
| SLC27A4    | 11.603584680997    | 2 | 0.00302213319647648  |
|            | 1.07525737231331   |   |                      |
| URM1       | 8.11062138051553   | 2 | 0.0173300950552562   |

|                     |                      |   |                     |
|---------------------|----------------------|---|---------------------|
| 0.276233476796571   |                      |   |                     |
| ODF2                | 7.20341013042092     | 2 | 0.0272771734145729  |
| 0.686660790869839   |                      |   |                     |
| GLE1                | 2.93590092060272     | 2 | 0.230397209840418   |
| 0.41684180812832    |                      |   |                     |
| AL356481.1          | 0.416497178456168    | 2 | 0.812005155885377   |
| 0.708497627747187   |                      |   |                     |
| SPTAN1              | 1.55424836392229     | 2 | 0.459726200984436   |
| 0.308911927804916   |                      |   |                     |
| WDR34               | 0.770530849998977    | 2 | 0.680270051561721   |
| 0.158749883154687   |                      |   |                     |
| HMGA1P4             | 4.6416303090682      | 2 | 0.0981935100868683  |
| 0.942869290055755   |                      |   |                     |
| SET                 | 8.33187338481452     | 2 | 0.015515175144774   |
| 0.19343571104019    |                      |   |                     |
| PKN3                | 2.09980100848101     | 2 | 0.349972568165425   |
| 2.1890862945447     |                      |   |                     |
| ZDHHC12             | 13.3869540469451     | 2 | 0.00123896735632678 |
| 0.653926692184398   |                      |   |                     |
| AL441992.1          | 0.034219711885457    | 2 | 0.98303568639083    |
| 0.0606256405533047  |                      |   |                     |
| ZER1                | 3.11373759296444     | 2 | 0.210795081214923   |
| 1.77252818276437    |                      |   |                     |
| TBC1D13             | 4.2973135250215      | 2 | 0.116640728793613   |
| 1.2942510320371     |                      |   |                     |
| ENDOG               | 5.13189903626832     | 2 | 0.0768461799477967  |
| 1.14008199814866    |                      |   |                     |
| SPOUT1              | 4.09323019791616     | 2 | 0.129171396823532   |
| 0.495151704509377   |                      |   |                     |
| KYAT1               | 0.143121455790982    | 2 | 0.930939741866879   |
| 0.220269443783939   |                      |   |                     |
| LRRC8A              | 0.0641727244188462   | 2 | 0.968422943322594   |
| 0.188352404657764   |                      |   |                     |
| PHYHD1              | 6.01935802204686     | 2 | 0.0493075033856101  |
| 1.52057693856189    |                      |   |                     |
| DOLK                | 1.15196750714524     | 2 | 0.562151578077424   |
| 0.613897725005801   |                      |   |                     |
| NUP188              | 0.00393434367790707  | 2 | 0.998034761775443   |
| 0.0331192320037115  |                      |   |                     |
| SH3GLB2             | 0.978649596905853    | 2 | 0.61304018015229    |
| 0.361501284727203   |                      |   |                     |
| MIGA2               | 0.000253497263473367 | 2 | 0.999873259400532   |
| 0.00740890002581513 |                      |   |                     |
| DOLPP1              | 4.2369307816803      | 2 | 0.120215971559129   |
| 1.72153954663751    |                      |   |                     |
| PTPA                | 1.09525292698507     | 2 | 0.578320848278987   |
| 0.284248357029006   |                      |   |                     |
| NTMT1               | 4.61269805699597     | 2 | 0.0996243139222247  |
| 0.206026690402274   |                      |   |                     |
| ASB6                | 1.19463985359546     | 2 | 0.550284464215021   |

|                               |   |                      |
|-------------------------------|---|----------------------|
| 0.397547437576584             |   |                      |
| TOR1B 0.101711966056064       | 2 | 0.950415536644368    |
| 0.210077468846786             |   |                      |
| TOR1A 5.29041242422349 2      |   | 0.070990713085289    |
| 0.259398114815385             |   |                      |
| C9orf78 1.13294768116349 2    |   | 0.567523091502726    |
| 0.136515250039158             |   |                      |
| USP20 0.0155834260974111      | 2 | 0.992238563660569    |
| 0.099746010984616             |   |                      |
| FNBP1 22.4895664857441 2      |   | 1.30753308689169e-05 |
| 0.308964599117724             |   |                      |
| GPR107 0.37438793333812 2     |   | 0.829282867548785    |
| 0.28973191547058              |   |                      |
| FUBP3 2.89729124500841 2      |   | 0.234888200050978    |
| 0.424589772793936             |   |                      |
| EXOSC2 0.000741033011835135   | 2 | 0.999629552126846    |
| 0.00947140125300901           |   |                      |
| ABL1 1.36111408199098 2       |   | 0.506334864517515    |
| 1.10099477142305              |   |                      |
| NUP214 1.83679483269115 2     |   | 0.399158213212338    |
| 0.337716124562456             |   |                      |
| AL157938.3 3.36258753690054 2 |   | 0.186133007181824    |
| 0.599134030323688             |   |                      |
| FAM78A 0.241064238650588      | 2 | 0.886448614756707    |
| 0.162101627709434             |   |                      |
| PRRC2B 6.87959664653808 2     |   | 0.0320711526809123   |
| 0.563860598520616             |   |                      |
| POMT1 2.99050865849866 2      |   | 0.224191579003193    |
| 1.17875068321866              |   |                      |
| UCK1 0.815940362631396        | 2 | 0.664998707913294    |
| 0.275880503376131             |   |                      |
| RAPGEF1 7.36752806775481 2    |   | 0.0251282131584208   |
| 0.641132111697851             |   |                      |
| MED27 0.00117116700243577     | 2 | 0.999414587919339    |
| 0.00972228202580518           |   |                      |
| SETX 1.80642372337244 2       |   | 0.405265909081889    |
| 0.263942788303579             |   |                      |
| TTF1 0.764179512565605        | 2 | 0.682433797735456    |
| 0.204048222892586             |   |                      |
| DDX31 0.00195673359675554     | 2 | 0.999022111646374    |
| 0.027236136960073             |   |                      |
| GTF3C4 1.0285566753406 2      |   | 0.597931943914894    |
| 0.750893120658025             |   |                      |
| SPACA9 0.0700764107908355     | 2 | 0.965568525625536    |
| 0.23940733519534              |   |                      |
| TSC1 4.17040772177785 2       |   | 0.124281781388643    |
| 0.368703196257263             |   |                      |
| GFI1B 2.62123691599428 2      |   | 0.269653235604167    |
| 1.80942128731312              |   |                      |
| GTF3C5 2.41095861528356 2     |   | 0.299548389267193    |

|                            |   |                      |
|----------------------------|---|----------------------|
| 0.371129269543186          |   |                      |
| RALGDS 1.7371242368371 2   |   | 0.419554385263359    |
| 0.815551637251235          |   |                      |
| GBGT1 0.458687098456272    | 2 | 0.795055345930671    |
| 0.401873002447045          |   |                      |
| SURF6 0.273587965871593    | 2 | 0.87214988538397     |
| 0.0477723377368382         |   |                      |
| MED22 0.260829655195808    | 2 | 0.877731248243957    |
| 0.286237909784902          |   |                      |
| RPL7A 17.5417166068176 2   |   | 0.000155190323086085 |
| 0.188891553251046          |   |                      |
| SURF1 0.158418719507044    | 2 | 0.923846487923878    |
| 0.0633008964604578         |   |                      |
| SURF2 0.178965940272325    | 2 | 0.914403837164549    |
| 0.0881364303536385         |   |                      |
| SURF4 8.16441598083349 2   |   | 0.0168701753140778   |
| 0.319443297850329          |   |                      |
| REX04 2.59237871564749 2   |   | 0.273572295410946    |
| 0.289979626107852          |   |                      |
| CACFD1 1.92797672018081 2  |   | 0.381368812566855    |
| 0.900938055434577          |   |                      |
| SLC2A6 1.36231560878582 2  |   | 0.506030768418125    |
| 0.249916009608291          |   |                      |
| VAV2 1.67051724838194 2    |   | 0.433762285505163    |
| 0.726281687051119          |   |                      |
| BRD30S 0.925045043291434   | 2 | 0.629693225624173    |
| 0.191975278231292          |   |                      |
| BRD3 0.469163099463975     | 2 | 0.790901733437027    |
| 0.209998641093412          |   |                      |
| WDR5 1.45202591441415 2    |   | 0.483834217287233    |
| 0.420632351248615          |   |                      |
| FCN1 12.6984705791123 2    |   | 0.00174808340290233  |
| 0.970874850607523          |   |                      |
| MRPS2 0.687051738095195    | 2 | 0.709265132893616    |
| 0.169982060825592          |   |                      |
| UBAC1 1.55640213076326 2   |   | 0.459231395932128    |
| 0.296051121000911          |   |                      |
| TMEM250 1.29533370772511 2 |   | 0.523265207850934    |
| 0.682205055593224          |   |                      |
| QS0X2 1.61678089763691 2   |   | 0.445574664595224    |
| 0.459959971999773          |   |                      |
| SNAPC4 1.57195526851812 2  |   | 0.455674001440404    |
| 0.662996063108311          |   |                      |
| ENTR1 0.41429986241994 2   |   | 0.812897762105346    |
| 0.253938670952896          |   |                      |
| PMPCA 0.760111088775179    | 2 | 0.683823425604083    |
| 0.0641730213106432         |   |                      |
| INPP5E 0.0976742687997152  | 2 | 0.952336219878722    |
| 0.160056397526014          |   |                      |
| SEC16A 0.196371144360517   | 2 | 0.906480670550306    |

|                              |   |                                    |
|------------------------------|---|------------------------------------|
| 0.241724707782723            |   |                                    |
| AGPAT2 1.29215544421096 2    |   | 0.524097406271438                  |
| 0.306324241532581            |   |                                    |
| SNHG7 14.923774478548 2      |   | 0.00057457079505685                |
| 0.402678184719661            |   |                                    |
| TMEM141 5.15164101313654 2   |   | 0.0760913637143538                 |
| 0.619389368428452            |   |                                    |
| RABL6 2.96382261772477 2     |   | 0.227203017979614                  |
| 0.367718119157879            |   |                                    |
| PHPT1 2.70439950630608 2     |   | 0.258670622826139                  |
| 0.147459501495718            |   |                                    |
| EDF1 4.7337623763772 2       |   | 0.0937727301872399                 |
| 0.0850948728047616           |   |                                    |
| TRAF2 0.559661698835548      | 2 | 0.755911593528451                  |
| 0.129949279682577            |   |                                    |
| FBXW5 1.05496554296608 2     |   | 0.590088489288836                  |
| 0.0724785962304211           |   |                                    |
| PAXX 4.35864963122718 2      |   | 0.113117880289099                  |
| 0.623438173521571            |   |                                    |
| UAP1L1 2.38862759483474 2    |   | 0.302911741701288                  |
| 0.737919668041246            |   |                                    |
| MAN1B1-DT 2.49232628385971 2 |   | 0.287606186689211                  |
| 0.983298986487565            |   |                                    |
| MAN1B1 0.489195326723126     | 2 | 0.783019512313229                  |
| 0.226958119382126            |   |                                    |
| DPP7 0.000970900527956974    | 2 | 0.999514667547936                  |
| 0.00266584184520761          |   |                                    |
| ANAPC2 2.76931549186417 2    |   | 0.250409488793339                  |
| 0.536279420853096            |   |                                    |
| SSNA1 3.04425744517928 2     |   | 0.218246805208469                  |
| 0.182814450689458            |   |                                    |
| TPRN 0.0674834259194339      | 2 | 0.966821189774491                  |
| 0.242229738421355            |   |                                    |
| TMEM203 0.958014166111495    | 2 | 0.619398097446008                  |
| 0.196009959908653            |   |                                    |
| TUBB4B 2.16118407788923 2    |   | 0.33939453137243 0.226543160384686 |
| NELFB 0.727095296441649      | 2 | 0.695205601116966                  |
| 0.219446275432437            |   |                                    |
| TOR4A 1.85053671117272 2     |   | 0.39642502193029 0.604733998302646 |
| EXD3 0.00577625768761864     | 2 | 0.997116037788078                  |
| 0.0472690070091969           |   |                                    |
| NOXA1 0.0260890850393612     | 2 | 0.987040168784968                  |
| 0.144831977737956            |   |                                    |
| NSMF 1.86655522015323 2      |   | 0.393262634132772                  |
| 0.669661253858338            |   |                                    |
| PNPLA7 2.42412320628261e-05  | 2 | 0.999987879457423                  |
| 0.00463738051178051          |   |                                    |
| MRPL41 10.3167343992342 2    |   | 0.00575108239305899                |
| 0.458525183699874            |   |                                    |
| DPH7 3.50615388134636 2      |   | 0.173240073100804                  |

|                               |   |                                    |  |
|-------------------------------|---|------------------------------------|--|
| 0.381975731749676             |   |                                    |  |
| ZMYND19 0.522445757894531     | 2 | 0.770109259345057                  |  |
| 0.386175210308072             |   |                                    |  |
| ARRDC1 1.72872619350315 2     |   | 0.421319807145963                  |  |
| 0.227065382201712             |   |                                    |  |
| ARRDC1-AS1 1.51351024425651 2 |   | 0.469186412199736                  |  |
| 0.440910616488699             |   |                                    |  |
| EHMT1 6.90155665155336 2      |   | 0.0317209375440942                 |  |
| 0.24655835465566              |   |                                    |  |
| BET1L 0.744721262001788       | 2 | 0.689105684835268                  |  |
| 0.386238288059752             |   |                                    |  |
| RIC8A 15.4325606092271 2      |   | 0.000445514704611627               |  |
| 0.615421544226205             |   |                                    |  |
| SIRT3 1.78607322381607 2      |   | 0.40941064201924 0.719744637235535 |  |
| PSMD13 3.57956261263858 2     |   | 0.166996686793964                  |  |
| 0.118022634698391             |   |                                    |  |
| IFITM2 7.01669463998365 2     |   | 0.029946365321711                  |  |
| 0.426426384597412             |   |                                    |  |
| SIGIRR 0.0728938955326156     | 2 | 0.964209245993692                  |  |
| 0.0890881641085464            |   |                                    |  |
| AN09 1.15759032371318 2       |   | 0.56057336002115 1.05929319296257  |  |
| PTDSS2 0.847182002714971      | 2 | 0.654691595131629                  |  |
| 0.417015407394103             |   |                                    |  |
| RNH1 5.72658687065701 2       |   | 0.0570804595554982                 |  |
| 0.295456971139016             |   |                                    |  |
| HRAS 0.0955052770109744       | 2 | 0.953369584837988                  |  |
| 0.0939724778806474            |   |                                    |  |
| LRRC56 0.818550398964894      | 2 | 0.66413143854283                   |  |
| 0.773183964142898             |   |                                    |  |
| LMNTD2 2.24932001903197 2     |   | 0.324762864873852                  |  |
| 2.28099083996175              |   |                                    |  |
| RASSF7 0.207155705918829      | 2 | 0.901605827327548                  |  |
| 0.131583722755797             |   |                                    |  |
| PHRF1 0.0578350598556557      | 2 | 0.971496580556083                  |  |
| 0.113495340953527             |   |                                    |  |
| IRF7 3.69751303679602 2       |   | 0.1574328094512 0.29165288645669   |  |
| DEAF1 4.88603528439705 2      |   | 0.0868982276501901                 |  |
| 0.786858651646464             |   |                                    |  |
| EPS8L2 0.014651247251759      | 2 | 0.992701143353388                  |  |
| 0.05464760457467              |   |                                    |  |
| TMEM80 0.016403194697108      | 2 | 0.991831943990822                  |  |
| 0.0309724269096413            |   |                                    |  |
| TALD01 12.4796770365473 2     |   | 0.00195017041430501                |  |
| 0.18158458383687              |   |                                    |  |
| GATD1 2.11626724487587 2      |   | 0.347103031472339                  |  |
| 0.368116783131551             |   |                                    |  |
| AP006621.3 2.0276125326214 2  |   | 0.362835300136594                  |  |
| 0.899889672641483             |   |                                    |  |
| CEND1 1.13372943370384 2      |   | 0.56730130354213 0.821705779811664 |  |
| SLC25A22 0.0103786103395047   | 2 | 0.994824136014134                  |  |

|                             |                                    |                   |
|-----------------------------|------------------------------------|-------------------|
| 0.0508136288099344          |                                    |                   |
| PAN01 0.00392377527552926   | 2                                  | 0.998040035605852 |
| 0.0436709475923537          |                                    |                   |
| PIDD1 0.153408383758718     | 2                                  | 0.926163779856818 |
| 0.215407285295325           |                                    |                   |
| RPLP2 58.7488691885381 2    | 1.74971148680925e-13               |                   |
| 0.227137407709659           |                                    |                   |
| PNPLA2 4.7992426004136 2    | 0.0907523146654751                 |                   |
| 0.314169152283642           |                                    |                   |
| CRACR2B 0.00163123480383066 | 2                                  | 0.999184715123547 |
| 0.0414346939414267          |                                    |                   |
| CD151 0.389110121672448     | 2                                  | 0.823200850881423 |
| 0.375859057084281           |                                    |                   |
| POLR2L 10.9116976975885 2   | 0.00427124959739422                |                   |
| 0.204777580487688           |                                    |                   |
| TSPAN4 1.46814387829783 2   | 0.479950675781439                  |                   |
| 0.972933952562784           |                                    |                   |
| CHID1 0.467779901297368     | 2                                  | 0.791448909542291 |
| 0.159051355608655           |                                    |                   |
| AP2A2 0.194099540675722     | 2                                  | 0.907510837888249 |
| 0.118195779689051           |                                    |                   |
| TOLLIP 2.59626249379181 2   | 0.273041563837742                  |                   |
| 0.167768745973999           |                                    |                   |
| MOB2 0.0413093509613825     | 2                                  | 0.979557171279872 |
| 0.0488582186426626          |                                    |                   |
| CTSD 13.3369059163009 2     | 0.00127036253559376                |                   |
| 0.978636532286192           |                                    |                   |
| LSP1 41.9415723765296 2     | 7.80734366045976e-10               |                   |
| 0.451410502066698           |                                    |                   |
| MRPL23 2.50068131565259 2   | 0.2864072133811 0.156772521229493  |                   |
| CD81 23.759979109903 2      | 6.92765244314497e-06               |                   |
| 0.481702967714878           |                                    |                   |
| TSSC4 10.4734167717383 2    | 0.00531773198110785                |                   |
| 0.529777716892065           |                                    |                   |
| KCNQ10T1 1.50245174692754 2 | 0.471787845901987                  |                   |
| 0.363626235682187           |                                    |                   |
| NAP1L4 0.0743999593993019   | 2                                  | 0.963483438953271 |
| 0.0320834503031258          |                                    |                   |
| CARS 2.29196817398061 2     | 0.317910911810734                  |                   |
| 0.274560605504935           |                                    |                   |
| ZNF195 0.61562682933245 2   | 0.735052455222474                  |                   |
| 0.0954980886073006          |                                    |                   |
| NUP98 0.140262133778689     | 2                                  | 0.932271621956557 |
| 0.13561128504478            |                                    |                   |
| PGAP2 0.915514803778218     | 2                                  | 0.63270094964557  |
| 0.436966622967573           |                                    |                   |
| RHOG 3.08111316108886 2     | 0.214261814276363                  |                   |
| 0.197368888749833           |                                    |                   |
| STIM1 1.59519765681153 2    | 0.45040917643088 0.371636437253471 |                   |
| RRM1 0.555862659611059      | 2                                  | 0.757348827019934 |

|                             |   |                                    |
|-----------------------------|---|------------------------------------|
| 0.186539303180379           |   |                                    |
| TRIM21 0.0971083052861036   | 2 | 0.952605751789802                  |
| 0.0799887245563486          |   |                                    |
| TRIM68 1.46910600224206 2   |   | 0.479719845289167                  |
| 0.785122100777567           |   |                                    |
| TRIM5 0.0491456671521543    | 2 | 0.975726620671304                  |
| 0.0798956681576042          |   |                                    |
| TRIM22 9.19281443713999 2   |   | 0.01008801474614 0.606901689375154 |
| FAM160A2 0.30471197574498 2 |   | 0.858682545752772                  |
| 0.223661522052935           |   |                                    |
| SMPD1 2.69005866270884 2    |   | 0.260532065989538                  |
| 0.411866653761248           |   |                                    |
| APBB1 5.38895786404957 2    |   | 0.0675775851172078                 |
| 0.975304127344784           |   |                                    |
| TRIM3 2.07042232726283 2    |   | 0.35515137795161 1.04625886353287  |
| ARFIP2 1.55557504904495 2   |   | 0.459421346151536                  |
| 0.249469580362947           |   |                                    |
| TIMM10B 2.28659344264604 2  |   | 0.318766403675263                  |
| 0.184862893705365           |   |                                    |
| DNHD1 0.194309428307295     | 2 | 0.907415605235179                  |
| 0.296023310047733           |   |                                    |
| RRP8 0.56428635888062 2     |   | 0.754165695780166                  |
| 0.178747158971681           |   |                                    |
| ILK 3.52386729062919 2      |   | 0.171712511507523                  |
| 0.121158556522782           |   |                                    |
| TAF10 6.21197142383582 2    |   | 0.0447803562663335                 |
| 0.470862374757289           |   |                                    |
| TPP1 2.47424621113623 2     |   | 0.290217944480908                  |
| 0.180736783154611           |   |                                    |
| MRPL17 0.186086606185569    | 2 | 0.911154043653756                  |
| 0.108760139179087           |   |                                    |
| ZNF215 1.61281117517686 2   |   | 0.446459946762543                  |
| 0.590126141591382           |   |                                    |
| PPFIBP2 2.88699163644799 2  |   | 0.236100948336906                  |
| 0.750177931266426           |   |                                    |
| EIF3F 21.8961409491699 2    |   | 1.75919266437452e-05               |
| 0.270335808644565           |   |                                    |
| RIC3 1.12155459714949 2     |   | 0.570765236373184                  |
| 0.317688051276174           |   |                                    |
| STK33 0.0155703558222504    | 2 | 0.992245048097283                  |
| 0.109729058472765           |   |                                    |
| TRIM66 0.626653080651722    | 2 | 0.731011168965974                  |
| 0.479972233232247           |   |                                    |
| RPL27A 69.0813418472308 2   |   | 9.99200722162641e-16               |
| 0.291810122903939           |   |                                    |
| AKIP1 0.484249699433224     | 2 | 0.784958169628796                  |
| 0.158632366813684           |   |                                    |
| TMEM9B 3.49613192777361 2   |   | 0.174110353742576                  |
| 0.209057703782756           |   |                                    |
| DENND5A 2.09311966721146 2  |   | 0.351143666284291                  |



1.4346437338352  
TMEM41B 0.422305076442026 2 0.809650554806087  
0.195125599291673  
IP07 0.133219438423719 2 0.935560261290329  
0.120182191543924  
AC132192.1 0.0219597023413356 2 0.989080207382893  
0.122773222326002  
AC132192.2 6.4958472030923 2 0.0388548021809476  
0.904635595100303  
ZNF143 2.88351181814964 2 0.236512100116696  
0.27821587956237  
WEE1 2.79539949540159 2 0.247164852067475  
0.270593380750777  
SWAP70 38.2326545368121 2 4.98751884236981e-09  
0.451742272392278  
AC026250.1 0.162290527635815 2 0.922059739797538  
0.401539103941038  
SBF2-AS1 0.0243208697659601 2 0.987913204407784  
0.0631813977443452  
SBF2 3.29505800662443 2 0.1925250501036 0.944343971745354  
AMPD3 0.338571051632824 2 0.844267808712943  
0.22141518253682  
MTRNR2L8 0.297970518340392 2 0.861581815236252  
0.33225311258683  
RNF141 8.45089290456643 2 0.0146188066528617  
1.00878277764871  
CTR9 5.33356607372732 2 0.0694753658903499  
0.512658122693806  
EIF4G2 0.248176263844003 2 0.883301990350126  
0.0428596240513296  
ZBED5 0.236889501639692 2 0.888300892197097  
0.091902320775709  
ZBED5-AS1 31.0544608826869 2 1.80554991846549e-07  
1.38265814337919  
USP47 6.3322008974267 2 0.042167712867085  
0.485449175211304  
ARNTL 0.590034424761266 2 0.744518772415122  
0.793636930101103  
BTBD10 11.8435243626528 2 0.00268047253404968  
0.818351266622013  
FAR1 1.74226618596758 2 0.418477107030973  
0.424136019696924  
SPON1 3.40893132998479 2 0.181869539478611  
0.534839371916175  
RRAS2 28.4571364176068 2 6.61624138587058e-07  
0.392525282609007  
COPB1 5.87120015965334 2 0.0530988461977276  
0.237806662523395  
PSMA1 13.7109289749539 2 0.00105368209977197  
0.19441707751178

|           |                    |   |                      |
|-----------|--------------------|---|----------------------|
| CYP2R1    | 0.281568874275045  | 2 | 0.868676545919376    |
|           | 0.181487876717321  |   |                      |
| C11orf58  | 7.56025293796897   | 2 | 0.0228198052449952   |
|           | 0.14855618746216   |   |                      |
| RPS13     | 54.4485590648614   | 2 | 1.50190970771291e-12 |
|           | 0.236097172324265  |   |                      |
| PIK3C2A   | 4.19517645932993   | 2 | 0.122752121462704    |
|           | 0.836067596149878  |   |                      |
| NUCB2     | 0.141973318058371  | 2 | 0.931474318816402    |
|           | 0.140477746881064  |   |                      |
| KCNC1     | 7.30232285729991   | 2 | 0.0259609594602938   |
|           | 0.944323822440096  |   |                      |
| SERGEF    | 2.46685698107822   | 2 | 0.291292171265538    |
|           | 0.349876928319217  |   |                      |
| SAAL1     | 0.355843522401885  | 2 | 0.837007907420521    |
|           | 0.13009603189263   |   |                      |
| HPS5      | 0.268445859601484  | 2 | 0.874395114145442    |
|           | 0.183976949443847  |   |                      |
| GTF2H1    | 0.0625224770129074 | 2 | 0.969222341803592    |
|           | 0.0374832569151465 |   |                      |
| LDHA      | 4.84761447996538   | 2 | 0.0885837151677866   |
|           | 0.179956313105871  |   |                      |
| TSG101    | 3.22326973662453   | 2 | 0.199561091132612    |
|           | 0.208282041591506  |   |                      |
| UEVLD     | 4.72265389743102   | 2 | 0.0942950154928865   |
|           | 0.899273683179766  |   |                      |
| SPTY2D10S | 1.33016943517235   | 2 | 0.514229961540168    |
|           | 1.0861434549214    |   |                      |
| SPTY2D1   | 0.766333504119386  | 2 | 0.681699215059512    |
|           | 0.280553905350578  |   |                      |
| IGSF22    | 0.305642338716785  | 2 | 0.858283195422611    |
|           | 0.329213694150114  |   |                      |
| ZDHHC13   | 3.32179010333872   | 2 | 0.189968872029084    |
|           | 0.627954843882603  |   |                      |
| HTATIP2   | 1.175542237        | 2 | 0.555564192512757    |
|           | 0.32235135758122   |   |                      |
| PRMT3     | 0.429338692863452  | 2 | 0.806808170077649    |
|           | 0.359196002084522  |   |                      |
| FANCF     | 2.48153674099814   | 2 | 0.289161949046456    |
|           | 0.431720890259477  |   |                      |
| SVIP      | 0.887188235072973  | 2 | 0.641725833237424    |
|           | 0.303006367379167  |   |                      |
| CCDC34    | 1.35066506279545   | 2 | 0.508987138258752    |
|           | 0.369586457027456  |   |                      |
| LIN7C     | 0.201865441217207  | 2 | 0.90399385099606     |
|           | 0.193676915299938  |   |                      |
| KIF18A    | 4.0182283964417    | 2 | 0.134107414657495    |
|           | 1.13406494207689   |   |                      |
| METTL15   | 2.87134512847495   | 2 | 0.237955269979254    |
|           | 0.694589363975318  |   |                      |

|           |                    |   |                      |
|-----------|--------------------|---|----------------------|
| ARL14EP   | 4.07023326693134   | 2 | 0.130665241675268    |
|           | 0.292227162031626  |   |                      |
| DNAJC24   | 1.47540004417697   | 2 | 0.478212529898113    |
|           | 0.509703282793779  |   |                      |
| IMMP1L    | 2.41077533515485   | 2 | 0.29957584115869     |
| ELP4      | 0.0163130206103467 | 2 | 0.323663988873363    |
|           | 0.029801260871341  |   | 0.991876663768841    |
| EIF3M     | 7.08495324516544   | 2 | 0.0289415609266686   |
|           | 0.15689239400463   |   |                      |
| PRRG4     | 2.64482429808848   | 2 | 0.266491708336471    |
|           | 2.15959977456056   |   |                      |
| QSER1     | 2.39333412029454   | 2 | 0.302199748870764    |
|           | 0.887129521135321  |   |                      |
| TCP11L1   | 8.02175014149351   | 2 | 0.0181175341738782   |
|           | 4.61341218311532   |   |                      |
| LINC00294 | 1.01954095690779   | 2 | 0.60063342130425     |
|           | 0.791906053551896  |   |                      |
| CSTF3     | 1.93105592684062   | 2 | 0.380782107635431    |
|           | 0.294706419487316  |   |                      |
| CSTF3-DT  | 0.274340209363688  | 2 | 0.871821912528993    |
|           | 0.52097927529985   |   |                      |
| HIPK3     | 1.53248605574125   | 2 | 0.464755867278039    |
|           | 0.341542363510551  |   |                      |
| CD59      | 4.69229690640263   | 2 | 0.0957371892887667   |
|           | 0.40405838299228   |   |                      |
| FBX03     | 4.84950401780346   | 2 | 0.0885000635489102   |
|           | 0.593235671982201  |   |                      |
| LM02      | 136.847201652074   | 2 | 0                    |
| CAPRIN1   | 1.20011179137429   | 2 | 2.27346253588196     |
|           | 0.235920546822638  |   | 0.548780960747833    |
| NAT10     | 3.37867989612542   | 2 | 0.184641356665791    |
|           | 0.588626802140118  |   |                      |
| CAT       | 17.7854729589207   | 2 | 0.000137383196831098 |
|           | 0.284287971723592  |   |                      |
| APIP      | 1.64519306143181   | 2 | 0.439289543591526    |
|           | 0.141710087881887  |   |                      |
| PDHX      | 0.0942494219886744 | 2 | 0.953968419821405    |
|           | 0.0792221680949158 |   |                      |
| CD44      | 0.545639195503436  | 2 | 0.76123010286459     |
|           | 0.187534462469082  |   |                      |
| SLC1A2    | 0.0827374490058562 | 2 | 0.959475282669053    |
|           | 0.224626178940786  |   |                      |
| TRIM44    | 2.10550632793901   | 2 | 0.348975638141087    |
|           | 0.312022088373191  |   |                      |
| COMMD9    | 8.19029746591166   | 2 | 0.0166532692087483   |
|           | 0.297183677630308  |   |                      |
| TRAF6     | 0.0572833419564384 | 2 | 0.971764613550294    |
|           | 0.11776204575831   |   |                      |
| API5      | 1.02107573093908   | 2 | 0.600172679821703    |
|           | 0.228707079607004  |   |                      |

|            |                      |   |                                  |
|------------|----------------------|---|----------------------------------|
| TTC17      | 3.90094235058014     | 2 | 0.142207051349944                |
|            | 0.396791076060415    |   |                                  |
| HSD17B12   | 27.9357844851156     | 2 | 8.58660480718143e-07             |
|            | 0.553954849885825    |   |                                  |
| ALKBH3     | 9.96510938658997     | 2 | 0.0068565238485212               |
|            | 0.723700093967372    |   |                                  |
| ACCS       | 6.57089762018148     | 2 | 0.037423785151288                |
|            | 10.2606155923873     |   |                                  |
| EXT2       | 1.90485932227082     | 2 | 0.385802514411506                |
|            | 0.682348797375343    |   |                                  |
| CD82       | 37.5437002710838     | 2 | 7.03864511120145e-09             |
|            | 0.614900263705326    |   |                                  |
| AC010768.1 | 0.000532126142893237 | 2 | 0.999733972320193                |
|            | 0.0235709219610337   |   |                                  |
| PRDM11     | 1.28988104965485     | 2 | 0.52469374742979 1.1437438243682 |
| AC103736.1 | 2.20025509784788     | 2 | 0.332828629057122                |
|            | 1.70171072643529     |   |                                  |
| SLC35C1    | 0.0969055416488047   | 2 | 0.95270233358911                 |
|            | 0.181737140696734    |   |                                  |
| CRY2       | 3.50462536154354     | 2 | 0.173372524149058                |
|            | 1.79779267092176     |   |                                  |
| PEX16      | 1.13800899189343     | 2 | 0.566088701884872                |
|            | 0.156742786478632    |   |                                  |
| LARGE2     | 0.11797743190256     | 2 | 0.942717406766229                |
|            | 0.312792847793889    |   |                                  |
| PHF21A     | 1.70324870434487     | 2 | 0.426721223141719                |
|            | 0.320183534073498    |   |                                  |
| DGKZ       | 4.26768006907938     | 2 | 0.118381829598331                |
|            | 0.484318779710012    |   |                                  |
| HARBI1     | 0.0400699078086931   | 2 | 0.980164412134872                |
|            | 0.132880692586071    |   |                                  |
| ATG13      | 1.12282465819085     | 2 | 0.570402898088053                |
|            | 0.392699722589567    |   |                                  |
| ARHGAP1    | 1.08014511882267     | 2 | 0.582705970037852                |
|            | 0.346482099795968    |   |                                  |
| ZNF408     | 0.0743393442636783   | 2 | 0.963512640235441                |
|            | 0.102739461365973    |   |                                  |
| CKAP5      | 0.0372882536506159   | 2 | 0.981528599795842                |
|            | 0.0778545530993595   |   |                                  |
| C11orf49   | 5.1309567197773      | 2 | 0.07688239519 0.501718251627983  |
| ARFGAP2    | 0.00404442749008636  | 2 | 0.997979829551613                |
|            | 0.00951152214827353  |   |                                  |
| DDB2       | 5.94008482429884     | 2 | 0.0513011344943969               |
|            | 0.588672555717817    |   |                                  |
| ACP2       | 10.1795896497154     | 2 | 0.00615928348940098              |
|            | 0.954519150890789    |   |                                  |
| NR1H3      | 1.8823848503504      | 2 | 0.390162318495678                |
|            | 0.765421684892609    |   |                                  |
| MADD       | 0.0274421239886812   | 2 | 0.986372642711167                |
|            | 0.083674199029499    |   |                                  |

|            |                    |   |                      |
|------------|--------------------|---|----------------------|
| SPI1       | 1.99872191359443   | 2 | 0.368114607160378    |
|            | 0.107467943065267  |   |                      |
| SLC39A13   | 3.35012561597962   | 2 | 0.187296415401172    |
|            | 0.737579051673666  |   |                      |
| PSMC3      | 11.7240260102388   | 2 | 0.00284550988756549  |
|            | 0.236993078491058  |   |                      |
| CELF1      | 3.97272362592578   | 2 | 0.13719365474654     |
| NDUFS3     | 0.146264619279454  | 2 | 0.203504505790543    |
|            | 0.0469983691155587 |   | 0.929477843011245    |
| PTPMT1     | 1.48336508499572   | 2 | 0.476311826045888    |
|            | 0.258660815440693  |   |                      |
| KBTBD4     | 1.20012781347597   | 2 | 0.548776564453263    |
|            | 0.358899398647841  |   |                      |
| MTCH2      | 1.73854741805892   | 2 | 0.419255940499879    |
|            | 0.126432425070729  |   |                      |
| FNBP4      | 4.08036522126165   | 2 | 0.130004968421385    |
|            | 0.23658598438562   |   |                      |
| NUP160     | 2.17023879938813   | 2 | 0.337861442933369    |
|            | 0.644039165579184  |   |                      |
| PTPRJ      | 2.89103077406771   | 2 | 0.23562460738923     |
| SSRP1      | 0.626729942747715  | 2 | 2.77987147998805     |
|            | 0.103770027501528  |   | 0.730983075980479    |
| SLC43A3    | 1.66755253247575   | 2 | 0.434405753285797    |
|            | 0.745643596280471  |   |                      |
| SLC43A1    | 0.0281951053593326 | 2 | 0.986001352496965    |
|            | 0.0497209867735964 |   |                      |
| TIMM10     | 0.0140490575259768 | 2 | 0.993000085570762    |
|            | 0.0162937254358645 |   |                      |
| UBE2L6     | 0.0827568540951708 | 2 | 0.959465973362437    |
|            | 0.042174186709095  |   |                      |
| CLP1       | 3.19017877478737   | 2 | 0.202890391848631    |
|            | 0.635958000041297  |   |                      |
| ZDHC5      | 2.61185388646785   | 2 | 0.270921289961968    |
|            | 0.813979612551375  |   |                      |
| MED19      | 1.3207936483861    | 2 | 0.516646276066727    |
|            | 0.238169448620259  |   |                      |
| TMX2       | 3.72134673405355   | 2 | 0.155567840836603    |
|            | 0.276391733896977  |   |                      |
| SELEN0H    | 2.08685088153183   | 2 | 0.352246015172375    |
|            | 0.059678604036317  |   |                      |
| CTNND1     | 0.887583297536822  | 2 | 0.64159908486182     |
|            | 0.659113113323531  |   |                      |
| LPXN       | 13.6880455907195   | 2 | 0.00106580723972882  |
|            | 0.345003076801408  |   |                      |
| ZFP91      | 0.0539607331156011 | 2 | 0.973380352143614    |
|            | 0.0240950315083968 |   |                      |
| FAM111B    | 36.9083097705574   | 2 | 9.67079916147640e-09 |
|            | 0.962331806653496  |   |                      |
| FAM111A-DT | 0.0469229728766255 | 2 | 0.976811594438003    |
|            | 0.0984596092766461 |   |                      |

|          |                     |   |                      |
|----------|---------------------|---|----------------------|
| FAM111A  | 2.13583052290565    | 2 | 0.343724346395853    |
|          | 0.438640144092987   |   |                      |
| MPEG1    | 29.5686515643833    | 2 | 3.79532432703833e-07 |
|          | 4.00671254791328    |   |                      |
| OSBP     | 0.399724600417301   | 2 | 0.818843499894281    |
|          | 0.268576791614992   |   |                      |
| PATL1    | 1.52946098488903    | 2 | 0.46545935888566     |
| STX3     | 10.3415890492886    | 2 | 0.469338064127012    |
|          | 4.28559247116606    |   | 0.00568005408297245  |
| MRPL16   | 0.0474936073243885  | 2 | 0.976532933020964    |
|          | 0.00419433730111809 |   |                      |
| MS4A7    | 8.22781019358363    | 2 | 0.0163438255234195   |
|          | 1.17965398593337    |   |                      |
| MS4A1    | 160.383590979543    | 0 | 0.76239180426691     |
| CCDC86   | 0.269531443416307   | 2 | 0.873920628338781    |
|          | 0.200541605244076   |   |                      |
| PRPF19   | 0.540564446992715   | 2 | 0.763164081105681    |
|          | 0.102459827311998   |   |                      |
| TMEM109  | 2.34679111749258    | 2 | 0.309314859297436    |
|          | 0.336849357021446   |   |                      |
| SLC15A3  | 0.998723643006068   | 2 | 0.606917858075106    |
|          | 0.476864539830606   |   |                      |
| VPS37C   | 2.26313637645188    | 2 | 0.322527076469399    |
|          | 0.824859751046779   |   |                      |
| DDB1     | 8.88474533536744    | 2 | 0.0117679838543066   |
|          | 0.401453512758476   |   |                      |
| TKFC     | 0.928809795136311   | 2 | 0.628509021166385    |
|          | 0.28523092899001    |   |                      |
| CYB561A3 | 1.67953797608612    | 2 | 0.43181026524226     |
| TMEM138  | 3.02763940412845    | 2 | 0.0669497994584      |
|          | 0.410496250347534   |   | 0.220067777162605    |
| TMEM216  | 4.84011942576844    | 2 | 0.0889163078516659   |
|          | 0.384090745988871   |   |                      |
| CPSF7    | 1.29435260132607    | 2 | 0.523521960243045    |
|          | 0.179565441065664   |   |                      |
| SDHAF2   | 0.667392018653242   | 2 | 0.716271488987379    |
|          | 0.128629837942612   |   |                      |
| TMEM258  | 13.472084688045     | 2 | 0.0011873369413602   |
|          | 0.169777642739797   |   |                      |
| FEN1     | 0.478844343711284   | 2 | 0.787082528130876    |
|          | 0.184472768025593   |   |                      |
| FADS2    | 0.85925303736493    | 2 | 0.650752093091933    |
|          | 0.411778112049004   |   |                      |
| FADS1    | 1.09601733855335    | 2 | 0.578099852941225    |
|          | 0.401887379819772   |   |                      |
| FADS3    | 0.126576318049186   | 2 | 0.938672947632741    |
|          | 0.0582789296769253  |   |                      |
| FTH1     | 48.8853824417881    | 2 | 2.42479369916282e-11 |
|          | 0.187347837981345   |   |                      |
| INCENP   | 0.0381382752382275  | 2 | 0.981111528182747    |

|                               |   |                                    |
|-------------------------------|---|------------------------------------|
| 0.187925573239988             |   |                                    |
| ASRGL1 1.70631466617907 2     |   | 0.426067568797547                  |
| 0.599860289962193             |   |                                    |
| EEF1G 3.0432967021945 2       |   | 0.218351669936993                  |
| 0.400319473353404             |   |                                    |
| TUT1 0.287455576909901        | 2 | 0.866123484784617                  |
| 0.21318157638758              |   |                                    |
| MTA2 0.11144292770436 2       |   | 0.945802539400917                  |
| 0.12464415336528              |   |                                    |
| EML3 6.56728137294778 2       |   | 0.0374915131929356                 |
| 0.768396617448141             |   |                                    |
| ROM1 1.41745695274264 2       |   | 0.492269732281815                  |
| 1.44921479287941              |   |                                    |
| B3GAT3 0.000876273133886588   | 2 | 0.999561959400866                  |
| 0.00737304089577023           |   |                                    |
| GANAB 1.29800882909313 2      |   | 0.522565776751648                  |
| 0.403573813067624             |   |                                    |
| INTS5 1.21794582623931 2      |   | 0.543909224314138                  |
| 0.328550938739638             |   |                                    |
| C11orf98 1.03561195286599 2   |   | 0.595826372044081                  |
| 0.868434890184584             |   |                                    |
| CSKMT 0.596602232838359       | 2 | 0.742077854275659                  |
| 0.172840821456776             |   |                                    |
| UQCC3 0.919271098409477       | 2 | 0.63151375926359                   |
| 0.15670449380466              |   |                                    |
| UBXN1 9.41775197505712 2      |   | 0.00901490475520983                |
| 0.215945479232008             |   |                                    |
| HNRNPUL2 1.1635206875582 2    |   | 0.558913619959466                  |
| 0.31448499257451              |   |                                    |
| TTC9C 3.11929389723644 2      |   | 0.21021027312884 0.350085918122252 |
| ZBTB3 0.00316403757775682     | 2 | 0.998419231943198                  |
| 0.037900144862936             |   |                                    |
| POLR2G 1.89539898302824 2     |   | 0.387631748628373                  |
| 0.0816255324001556            |   |                                    |
| AP001160.2 2.93241661668893 2 |   | 0.230798946632064                  |
| 2.06484002435687              |   |                                    |
| TAF6L 0.510356201496008       | 2 | 0.774778497042552                  |
| 0.306038647702036             |   |                                    |
| TMEM223 0.481533631516348     | 2 | 0.786024893638877                  |
| 0.109958262518261             |   |                                    |
| AP001160.3 4.52667898539821 2 |   | 0.10400258829494                   |
| 0.921135147667168             |   |                                    |
| TMEM179B 4.78010300937462 2   |   | 0.091624964640821                  |
| 0.342720395188398             |   |                                    |
| NXF1 0.546591517801739        | 2 | 0.760867720946983                  |
| 0.153422646189213             |   |                                    |
| STX5 0.672941924493867        | 2 | 0.714286624553637                  |
| 0.119557039515857             |   |                                    |
| WDR74 0.44433549277409 2      |   | 0.800781024943752                  |
| 0.1238277580637               |   |                                    |

|            |                    |   |                      |
|------------|--------------------|---|----------------------|
| SLC3A2     | 14.747085378312    | 2 | 0.00062764069989274  |
|            | 0.743160837559592  |   |                      |
| ATL3       | 1.26242162835226   | 2 | 0.531947321555314    |
|            | 0.465701595779442  |   |                      |
| RTN3       | 4.24915337817886   | 2 | 0.119483536247503    |
|            | 0.317103040899194  |   |                      |
| SPINDOC    | 2.49333969696208   | 2 | 0.287460491665684    |
|            | 0.831963142016367  |   |                      |
| MARK2      | 3.67973551825907   | 2 | 0.158838429650327    |
|            | 0.462048840963285  |   |                      |
| NAA40      | 0.122831062663999  | 2 | 0.940432379454988    |
|            | 0.162510847477344  |   |                      |
| COX8A      | 15.8291580614345   | 2 | 0.00036537766864142  |
|            | 0.322606316619464  |   |                      |
| OTUB1      | 0.88294475938793   | 2 | 0.643088852695977    |
|            | 0.0555501450353024 |   |                      |
| MACROD1    | 1.86447282903195   | 2 | 0.393672310681289    |
|            | 1.24686627999422   |   |                      |
| STIP1      | 12.7786273264205   | 2 | 0.00167940844573145  |
|            | 0.64312379698999   |   |                      |
| FERMT3     | 43.490615847349    | 2 | 3.59859364529314e-10 |
|            | 0.768894420299806  |   |                      |
| TRPT1      | 0.485781177575604  | 2 | 0.784357326562926    |
|            | 0.0582773469954361 |   |                      |
| NUDT22     | 0.031710277314005  | 2 | 0.984269892386909    |
|            | 0.0268861603029106 |   |                      |
| DNAJC4     | 4.00536656586745   | 2 | 0.134972627152807    |
|            | 0.372765450431255  |   |                      |
| VEGFB      | 1.51947782627604   | 2 | 0.467788544510735    |
|            | 0.366931015596143  |   |                      |
| FKBP2      | 5.09741793931985   | 2 | 0.0781825369006492   |
|            | 0.170673335851761  |   |                      |
| PPP1R14B   | 3.14397125865878   | 2 | 0.207632491602121    |
|            | 0.352226482117488  |   |                      |
| PLCB3      | 1.48576340541153   | 2 | 0.475740994185368    |
|            | 1.03730580586658   |   |                      |
| BAD        | 0.0398392341455065 | 2 | 0.980277467712219    |
|            | 0.03436493818209   |   |                      |
| GPR137     | 0.462959310170979  | 2 | 0.793358836156631    |
|            | 0.209708413887564  |   |                      |
| ESRRA      | 0.963162401328939  | 2 | 0.617805744228047    |
|            | 0.308521073781329  |   |                      |
| TRMT112    | 8.97602485035642   | 2 | 0.0112429678567172   |
|            | 0.157545335913819  |   |                      |
| PRDX5      | 6.28740754892769   | 2 | 0.0431227846897185   |
|            | 0.0973806390259071 |   |                      |
| AP003774.4 | 0.0942834519286757 | 2 | 0.953952188215451    |
|            | 0.0929581123560742 |   |                      |
| CCDC88B    | 3.72935120092713   | 2 | 0.154946466294727    |
|            | 0.431079636476207  |   |                      |



|            |                    |   |                     |
|------------|--------------------|---|---------------------|
| RPS6KA4    | 1.78688069319105   | 2 | 0.409245382104452   |
|            | 0.538545722832254  |   |                     |
| RASGRP2    | 1.75732746897661   | 2 | 0.415337542265633   |
|            | 0.191105269449783  |   |                     |
| SF1        | 0.878810616598762  | 2 | 0.644419538104621   |
|            | 0.0826168882484859 |   |                     |
| AP001462.1 | 1.69215441828719   | 2 | 0.429094884232096   |
|            | 0.966163725982555  |   |                     |
| MAP4K2     | 10.0179450231552   | 2 | 0.0066777611047204  |
|            | 0.306359807455634  |   |                     |
| MEN1       | 11.0442715274783   | 2 | 0.00399730152712141 |
|            | 0.729605882899273  |   |                     |
| EHD1       | 6.64356389897043   | 2 | 0.0360884665988725  |
|            | 0.170372454775715  |   |                     |
| ATG2A      | 1.26903986419253   | 2 | 0.530189954412176   |
|            | 0.361530817242657  |   |                     |
| PPP2R5B    | 1.12343593204166   | 2 | 0.570228588539114   |
|            | 0.288993460455216  |   |                     |
| ARL2       | 1.17281964552085   | 2 | 0.556320994679999   |
|            | 0.106629078941821  |   |                     |
| SNX15      | 14.6102705938686   | 2 | 0.00067207857517404 |
|            | 0.796962517107849  |   |                     |
| SAC3D1     | 5.3999206838286    | 2 | 0.0672081780345832  |
|            | 0.630802926492329  |   |                     |
| NAALADL1   | 9.49099899654528   | 2 | 0.0086907199218651  |
|            | 1.31116410424659   |   |                     |
| CDCA5      | 0.338754752158279  | 2 | 0.844190266054111   |
|            | 0.633293255118188  |   |                     |
| ZFPL1      | 0.94052545430446   | 2 | 0.624838084785293   |
|            | 0.270074524882651  |   |                     |
| VPS51      | 0.849686212249209  | 2 | 0.65387236565197    |
|            | 0.14236569727221   |   |                     |
| TM7SF2     | 3.23165722535532   | 2 | 0.198725935370034   |
|            | 0.373127700924076  |   |                     |
| ZNHIT2     | 1.73016972907763   | 2 | 0.421015821797651   |
|            | 0.315959569675082  |   |                     |
| FAU        | 10.3398808503024   | 2 | 0.00568490748663553 |
|            | 0.103487588356547  |   |                     |
| SYVN1      | 0.950674936259892  | 2 | 0.621675225485599   |
|            | 0.0829314045171005 |   |                     |
| MRPL49     | 0.612986115974693  | 2 | 0.736023627646961   |
|            | 0.13023877240556   |   |                     |
| AP003068.2 | 2.70059205599668   | 2 | 0.259163529628268   |
|            | 3.70214373197454   |   |                     |
| CAPN1      | 0.746216893358123  | 2 | 0.688590553435909   |
|            | 0.0936034833660436 |   |                     |
| POLA2      | 8.73921709220296   | 2 | 0.0126561939148869  |
|            | 1.22644198440336   |   |                     |
| DPF2       | 0.330670203611465  | 2 | 0.847609620977647   |
|            | 0.118841978889214  |   |                     |

|            |                    |   |                      |
|------------|--------------------|---|----------------------|
| SLC25A45   | 6.24930113639492   | 2 | 0.0439522892680406   |
|            | 0.7082043525897    |   |                      |
| FRMD8      | 0.472207465437381  | 2 | 0.789698752085388    |
|            | 0.0827835317173001 |   |                      |
| NEAT1      | 63.0097791427263   | 2 | 2.07611705604904e-14 |
|            | 0.459882820965579  |   |                      |
| MALAT1     | 497.14873088953    | 2 | 0.756832359626639    |
| SCYL1      | 1.51731935506554   | 2 | 0.468293671089964    |
|            | 0.274120113789484  |   |                      |
| LTBP3      | 7.88782548511817   | 2 | 0.0193722675656273   |
|            | 0.905537548267413  |   |                      |
| SSSCA1     | 10.2246471556879   | 2 | 0.00602207389688891  |
|            | 0.341752274480665  |   |                      |
| FAM89B     | 0.0124962241966915 | 2 | 0.993771366764231    |
|            | 0.0436378043936152 |   |                      |
| EHBP1L1    | 3.28664659087119   | 2 | 0.193336459302281    |
|            | 0.702756859574384  |   |                      |
| MAP3K11    | 2.01415581397487   | 2 | 0.365284817787575    |
|            | 0.266121048746179  |   |                      |
| SIPA1      | 8.56526156941432   | 2 | 0.0138062928835035   |
|            | 0.614998418435017  |   |                      |
| RELA       | 1.01378214028399   | 2 | 0.602365382485028    |
|            | 0.243626429073824  |   |                      |
| KAT5       | 0.526047008099162  | 2 | 0.768723828975831    |
|            | 0.0824587690295209 |   |                      |
| RNASEH2C   | 4.70955934310269   | 2 | 0.0949144165771594   |
|            | 0.226281105221432  |   |                      |
| AP5B1      | 1.40872574935857   | 2 | 0.494423483647703    |
|            | 0.690034346784991  |   |                      |
| CFL1       | 12.1264697441649   | 2 | 0.00232686160015838  |
|            | 0.121554698120435  |   |                      |
| MUS81      | 2.67089564227439   | 2 | 0.263040354046062    |
|            | 0.24156763104176   |   |                      |
| FIBP       | 1.36742545059206   | 2 | 0.5047395500131      |
| CCDC85B    | 4.61562407490841   | 2 | 0.138263871862972    |
|            | 0.312488168792053  |   | 0.0994786692244259   |
| C11orf68   | 0.0430768374566797 | 2 | 0.978691876649527    |
|            | 0.0839067617141975 |   |                      |
| DRAP1      | 9.89533516921395   | 2 | 0.00709994966350647  |
|            | 0.397878390572561  |   |                      |
| SART1      | 1.71620107790039   | 2 | 0.423966626068729    |
|            | 0.322017300013621  |   |                      |
| EIF1AD     | 0.308284578043775  | 2 | 0.85715004929192     |
|            | 0.164499448602236  |   |                      |
| BANF1      | 0.49938883005283   | 2 | 0.779038809254888    |
|            | 0.0727749937098018 |   |                      |
| SF3B2      | 2.27351646124282   | 2 | 0.320857483645359    |
|            | 0.125166344069711  |   |                      |
| AP006287.2 | 0.699762314699747  | 2 | 0.704771841695363    |
|            | 0.946572221662071  |   |                      |

|            |                      |   |                     |
|------------|----------------------|---|---------------------|
| PACS1      | 4.39220798275581     | 2 | 0.111235690449927   |
|            | 0.468540333737784    |   |                     |
| AP000759.1 | 6.34840740035762e-05 | 2 | 0.999968258466771   |
|            | 0.00812830803678162  |   |                     |
| KLC2       | 3.50065573521552     | 2 | 0.173716977942398   |
|            | 0.449470394819233    |   |                     |
| RAB1B      | 5.68140350604733     | 2 | 0.0583846799594591  |
|            | 0.513458489734302    |   |                     |
| YIF1A      | 0.00341391952824995  | 2 | 0.998294496263115   |
|            | 0.0115145426448202   |   |                     |
| BRMS1      | 0.000137234369552887 | 2 | 0.999931385169329   |
|            | 0.000653122848828124 |   |                     |
| B4GAT1     | 3.1733261551098      | 2 | 0.20460723231015    |
|            | 1.14879174710981     |   |                     |
| SLC29A2    | 0.266070551685212    | 2 | 0.875434209884676   |
|            | 0.556353308488527    |   |                     |
| MRPL11     | 0.644442237332629    | 2 | 0.724537963747774   |
|            | 0.119164726048374    |   |                     |
| AP002748.3 | 0.692899388336011    | 2 | 0.707194394394838   |
|            | 0.67196862128041     |   |                     |
| DPP3       | 2.07177410641776     | 2 | 0.354911415939876   |
|            | 0.220094450676446    |   |                     |
| ZDHHC24    | 0.0246693319819453   | 2 | 0.987741094189492   |
|            | 0.0372605484914525   |   |                     |
| CCS        | 0.0932802971402292   | 2 | 0.954430789085884   |
|            | 0.0503056853008091   |   |                     |
| RBM14      | 11.5409212691987     | 2 | 0.00311832077684326 |
|            | 0.651391559524437    |   |                     |
| RBM4       | 0.051106547863457    | 2 | 0.97477044772818    |
|            | 0.0406781576235061   |   |                     |
| RBM4B      | 0.180857153156916    | 2 | 0.913539579693382   |
|            | 0.0799750541361527   |   |                     |
| AP001157.1 | 2.45587631698042     | 2 | 0.292895860373452   |
|            | 1.0030318276184      |   |                     |
| C11orf80   | 2.10732979424801     | 2 | 0.348657610481893   |
|            | 0.654903172892036    |   |                     |
| RCE1       | 0.0988195092361312   | 2 | 0.951791049007516   |
|            | 0.120701950512145    |   |                     |
| KDM2A      | 0.924162964705911    | 2 | 0.629971006330659   |
|            | 0.350906136587207    |   |                     |
| GRK2       | 4.54639495597758     | 2 | 0.102982369223787   |
|            | 0.535892495264397    |   |                     |
| ANKRD13D   | 0.0973261805640441   | 2 | 0.952501982820608   |
|            | 0.0853298782685912   |   |                     |
| RAD9A      | 0.219445184943249    | 2 | 0.896082680902453   |
|            | 0.152159051632577    |   |                     |
| POLD4      | 5.70932903697376     | 2 | 0.0575751332741025  |
|            | 0.25919666043521     |   |                     |
| CLCF1      | 5.29530859722815     | 2 | 0.0708171342335062  |
|            | 3.86050710984324     |   |                     |
| PPP1CA     | 0.555484615829164    | 2 | 0.75749199605794    |

|                              |   |                      |  |
|------------------------------|---|----------------------|--|
| 0.039194101051242            |   |                      |  |
| TBC1D10C 4.07668506303484 2  |   | 0.130244408074809    |  |
| 0.13425628786463             |   |                      |  |
| RPS6KB2 1.69870662259772 2   |   | 0.427691425748988    |  |
| 0.121501809930954            |   |                      |  |
| COR01B 2.27663973698495 2    |   | 0.320356811483738    |  |
| 0.154234614323758            |   |                      |  |
| TMEM134 7.67463377865435 2   |   | 0.0215513484926064   |  |
| 0.334750237357137            |   |                      |  |
| AIP 0.594715251870564        | 2 | 0.742778328062693    |  |
| 0.0847542191579519           |   |                      |  |
| PITPNM1 0.177141258105168    | 2 | 0.915238466027383    |  |
| 0.14264200122132             |   |                      |  |
| CDK2AP2 3.34296601044943 2   |   | 0.187968101160884    |  |
| 0.108597841739982            |   |                      |  |
| GSTP1 60.4719226846764 2     |   | 7.39408534400354e-14 |  |
| 0.325594272487828            |   |                      |  |
| NDUFV1 4.80112645037147 2    |   | 0.0906668730395137   |  |
| 0.279307208618172            |   |                      |  |
| NUDT8 2.99977019815886 2     |   | 0.223155799482201    |  |
| 0.870357787412349            |   |                      |  |
| ACY3 5.07228657770652 2      |   | 0.0791711520067393   |  |
| 0.205690208181129            |   |                      |  |
| UNC93B1 0.0692157994018205   | 2 | 0.965984104667151    |  |
| 0.0559226086738263           |   |                      |  |
| NDUFS8 7.369691798416 2      |   | 0.0251010425159233   |  |
| 0.178117571737678            |   |                      |  |
| TCIRG1 12.6745667702506 2    |   | 0.00176910168270572  |  |
| 1.28074835855113             |   |                      |  |
| AP002807.1 0.906463216400462 | 2 | 0.635570913143025    |  |
| 0.790430822159706            |   |                      |  |
| CHKA 0.916422668412749       | 2 | 0.632413811412954    |  |
| 0.424537388781554            |   |                      |  |
| KMT5B 0.0942144375519905     | 2 | 0.953985106991243    |  |
| 0.0840455157593343           |   |                      |  |
| C11orf24 3.06847247330869 2  |   | 0.215620311186635    |  |
| 0.667644872781773            |   |                      |  |
| PPP6R3 0.522603391651663     | 2 | 0.770048564129016    |  |
| 0.292374706463014            |   |                      |  |
| TESMIN 1.3455427570165 2     |   | 0.510292402916294    |  |
| 1.72572316821023             |   |                      |  |
| CPT1A 0.909527935082791      | 2 | 0.634597735936318    |  |
| 0.700931973827569            |   |                      |  |
| MRPL21 1.9249487504594e-05   | 2 | 0.999990375302565    |  |
| 0.000556670543373819         |   |                      |  |
| IGHMBP2 0.208636383076622    | 2 | 0.900938580775278    |  |
| 0.314488420132384            |   |                      |  |
| TPCN2 5.83821090195714 2     |   | 0.0539819552133411   |  |
| 0.958087653066826            |   |                      |  |
| ORA0V1 0.57250943506059 2    |   | 0.751071280558022    |  |

|                    |                    |   |                                    |
|--------------------|--------------------|---|------------------------------------|
| 0.288458680663607  |                    |   |                                    |
| FADD               | 0.0624531615902438 | 2 | 0.969255933413831                  |
| 0.056288653442756  |                    |   |                                    |
| PPFIA1             | 1.78437934065717   | 2 | 0.40975753579368 0.446421229795979 |
| AP000487.1         | 1.35169853767351   | 2 | 0.508724193490983                  |
| 0.606212285721119  |                    |   |                                    |
| CTTN               | 0.053604960234938  | 2 | 0.973553518711081                  |
| 0.126530659020037  |                    |   |                                    |
| SHANK2             | 2.09104274254336   | 2 | 0.351508505158495                  |
| 0.82316857435113   |                    |   |                                    |
| DHCR7              | 0.0270566355243954 | 2 | 0.986562778672009                  |
| 0.0491562359145681 |                    |   |                                    |
| AP002387.2         | 0.443708473085723  | 2 | 0.801032117035972                  |
| 0.355099846494101  |                    |   |                                    |
| NADSYN1            | 0.0208401618133907 | 2 | 0.989634020061143                  |
| 0.0339647102602528 |                    |   |                                    |
| FAM86C1            | 0.462097159984939  | 2 | 0.793700907114564                  |
| 0.168598660173942  |                    |   |                                    |
| AP002495.2         | 0.78282285128391   | 2 | 0.676101933137327                  |
| 0.584155826430735  |                    |   |                                    |
| RNF121             | 0.762554994458     | 2 | 0.682988335950141                  |
| 0.181452582819794  |                    |   |                                    |
| NUMA1              | 2.61962679357599   | 2 | 0.269870410371833                  |
| 0.337926583994934  |                    |   |                                    |
| LRTOMT             | 0.478110239666164  | 2 | 0.787371481391944                  |
| 0.579169855047137  |                    |   |                                    |
| LAMTOR1            | 2.56129289798158   | 2 | 0.277857621603776                  |
| 0.147188446269643  |                    |   |                                    |
| ANAPC15            | 9.23671189784903   | 2 | 0.009869007884029                  |
| 0.468672449757349  |                    |   |                                    |
| FOLR2              | 4.57445731591521   | 2 | 0.101547495096855                  |
| 0.677160726704101  |                    |   |                                    |
| INPPL1             | 1.69971048269014   | 2 | 0.427476808437844                  |
| 0.715252732717872  |                    |   |                                    |
| CLPB               | 7.35881429584642   | 2 | 0.0252379327617219                 |
| 0.518839357868578  |                    |   |                                    |
| ARAP1              | 2.80746924535203   | 2 | 0.245677734883481                  |
| 0.779356600358553  |                    |   |                                    |
| STARD10            | 8.94329284632929   | 2 | 0.0114284842311775                 |
| 0.943452998342391  |                    |   |                                    |
| ATG16L2            | 5.32384643905002   | 2 | 0.069813825237275                  |
| 1.08838218223737   |                    |   |                                    |
| FCHSD2             | 1.74036396029173   | 2 | 0.418875315320337                  |
| 0.373197152489867  |                    |   |                                    |
| AP002761.2         | 1.44170323811831   | 2 | 0.486337904921373                  |
| 1.55358070140385   |                    |   |                                    |
| RELT               | 3.16672506444132   | 2 | 0.20528366343784 0.493263322644908 |
| FAM168A            | 3.85507816795727   | 2 | 0.145505835888063                  |
| 1.43654860991984   |                    |   |                                    |
| AP000763.3         | 4.73906620983027   | 2 | 0.0935243821602527                 |

|                               |   |                      |
|-------------------------------|---|----------------------|
| 1.24199965107074              |   |                      |
| PLEKHB1 0.222640231782385     | 2 | 0.894652310663021    |
| 0.309943337065393             |   |                      |
| RAB6A 1.45524121357122 2      |   | 0.483057006320566    |
| 0.159050990511767             |   |                      |
| MRPL48 0.214743580144856      | 2 | 0.89819167215821     |
| 0.0727482722393431            |   |                      |
| COA4 2.45150634760689 2       |   | 0.293536533018255    |
| 0.268715476985076             |   |                      |
| PAAF1 1.92907512363476 2      |   | 0.381159421660565    |
| 0.365843305595456             |   |                      |
| UCP2 55.9346586651101 2       |   | 7.14428516346288e-13 |
| 0.397228079196676             |   |                      |
| C2CD3 0.0248817077666455      | 2 | 0.987636213613135    |
| 0.115220288036755             |   |                      |
| PPME1 0.512108353820255       | 2 | 0.774100029308465    |
| 0.310888349340666             |   |                      |
| P4HA3 2.73059813265595 2      |   | 0.255304311646645    |
| 0.911501932891517             |   |                      |
| PGM2L1 1.03408209077869 2     |   | 0.596282312491954    |
| 0.400251294058529             |   |                      |
| LIPT2 6.7742603506979 2       |   | 0.0338055538349127   |
| 1.77655348051907              |   |                      |
| POLD3 0.425342553151012       | 2 | 0.808421840738533    |
| 0.265710771811245             |   |                      |
| RNF169 0.0476858714121454     | 2 | 0.976439061426304    |
| 0.085932999152192             |   |                      |
| XRRA1 2.96988339845651 2      |   | 0.226515546322678    |
| 0.524338637042301             |   |                      |
| SPCS2 11.8401741033193 2      |   | 0.00268496643599592  |
| 0.230940276222689             |   |                      |
| NEU3 0.654694976815365        | 2 | 0.720833218314674    |
| 0.621704560802529             |   |                      |
| RPS3 46.9751909032432 2       |   | 6.30183683014707e-11 |
| 0.277709360104363             |   |                      |
| GDPD5 0.105390813287042       | 2 | 0.948668926731965    |
| 0.114399328690843             |   |                      |
| SERPINH1 2.4975577950821 2    |   | 0.286854862261499    |
| 1.49799115861916              |   |                      |
| UVRAG 8.57479190427127 2      |   | 0.0137406600861737   |
| 0.353336161099964             |   |                      |
| THAP12 2.1313064526894 2      |   | 0.344502742983213    |
| 0.487808507216524             |   |                      |
| GVQW3 1.2090524590151 2       |   | 0.546333201884932    |
| 0.71144054711823              |   |                      |
| AP002360.1 2.47412798785757 2 |   | 0.290235100246417    |
| 0.774745798297265             |   |                      |
| EMSY 2.11734273382769 2       |   | 0.346916428911337    |
| 0.488789860250591             |   |                      |
| ACER3 0.746394820103777       | 2 | 0.688529296822616    |

|                               |  |                     |
|-------------------------------|--|---------------------|
| 0.272616890378385             |  |                     |
| PAK1 4.15942239257081 2       |  | 0.124966297718496   |
| 1.74688477419066              |  |                     |
| CLNS1A 7.67450594495253 2     |  | 0.0215527260309585  |
| 0.407674596159265             |  |                     |
| RSF1 5.54960971811921 2       |  | 0.0623616448123985  |
| 0.267366565869575             |  |                     |
| AAMDC 1.53293676347008 2      |  | 0.464651144547616   |
| 0.59159595819531              |  |                     |
| INTS4 1.9566850927948 2       |  | 0.375933675387622   |
| 0.503198847707081             |  |                     |
| NDUFC2 2.45039112197126 2     |  | 0.293700258395004   |
| 0.0738487380313794            |  |                     |
| ALG8 0.010089149815152 2      |  | 0.994968127591877   |
| 0.0253627848611118            |  |                     |
| KCTD21-AS1 1.01951980021347 2 |  | 0.600639775046703   |
| 0.880254746756229             |  |                     |
| KCTD21 2.04752595593171 2     |  | 0.359240579172057   |
| 1.41673011358189              |  |                     |
| NARS2 0.394449638462963 2     |  | 0.821006034617023   |
| 0.198536054883851             |  |                     |
| PRCP 8.36698875329336 2       |  | 0.0152451421129554  |
| 0.967702681167075             |  |                     |
| RAB30 5.92941553495843 2      |  | 0.0515755390928571  |
| 0.254733220311905             |  |                     |
| RAB30-AS1 11.1526281498419 2  |  | 0.00378649657128582 |
| 0.632230308537832             |  |                     |
| PCF11 0.812414495690116 2     |  | 0.666172090387126   |
| 0.171775168002372             |  |                     |
| ANKRD42 0.140384448055629 2   |  | 0.932214608635284   |
| 0.104831828193574             |  |                     |
| CCDC90B 4.46582491607363 2    |  | 0.107215713703053   |
| 0.203869139340968             |  |                     |
| DLG2 3.5010627622855 2        |  | 0.173681627783368   |
| 4.80816401329161              |  |                     |
| TMEM126B 1.40654626143256 2   |  | 0.494962572335149   |
| 0.171377330651738             |  |                     |
| TMEM126A 1.47398909637463 2   |  | 0.478550015386773   |
| 0.151342334923478             |  |                     |
| CREBZF 2.32976726121367 2     |  | 0.311958962395627   |
| 0.384290311236349             |  |                     |
| SYTL2 0.00766113795087843 2   |  | 0.996176758295041   |
| 0.0437474646399868            |  |                     |
| PICALM 0.152468540187952 2    |  | 0.926599106670572   |
| 0.115259357637424             |  |                     |
| EED 0.014527823641309 2       |  | 0.992762406623307   |
| 0.0169454059705216            |  |                     |
| HIKESHI 0.381337642398364 2   |  | 0.826406231060919   |
| 0.073905859198141             |  |                     |
| TMEM135 0.548129498274203 2   |  | 0.760282846008892   |

|                              |   |                                    |
|------------------------------|---|------------------------------------|
| 0.520297337172399            |   |                                    |
| CTSC 4.90538054688982 2      |   | 0.0860617451532845                 |
| 0.641665668153525            |   |                                    |
| CHORDC1 0.393382053046557    | 2 | 0.821444398639042                  |
| 0.0795123518124438           |   |                                    |
| FAT3 1.46619204915426 2      |   | 0.480419295268773                  |
| 1.39734944059399             |   |                                    |
| SLC36A4 0.000668086173655703 | 2 | 0.999666012699352                  |
| 0.00696284366905617          |   |                                    |
| SMC04 19.5430732462509 2     |   | 5.70526162891882e-05               |
| 1.31017441141935             |   |                                    |
| CEP295 2.4539906123249 2     |   | 0.293172148146013                  |
| 0.653324283016854            |   |                                    |
| TAF1D 5.55710824112964 2     |   | 0.0621282724584684                 |
| 0.271812551264794            |   |                                    |
| C11orf54 0.55108594077537 2  |   | 0.759159810001811                  |
| 0.268209429718237            |   |                                    |
| MED17 5.54883979943886 2     |   | 0.0623856561314321                 |
| 0.731665509768844            |   |                                    |
| PANX1 0.309085014668849      | 2 | 0.85680707078332                   |
| 0.352043434060059            |   |                                    |
| MRE11 0.193558354021533      | 2 | 0.907756437492555                  |
| 0.121288311723723            |   |                                    |
| ANKRD49 0.558514754697142    | 2 | 0.756345212036294                  |
| 0.103285665372183            |   |                                    |
| CWC15 0.000385666303289972   | 2 | 0.999807185439472                  |
| 0.00244283934584872          |   |                                    |
| KDM4D 0.920471946456346      | 2 | 0.631134697041819                  |
| 0.512164729258046            |   |                                    |
| SRSF8 5.68434899733427 2     |   | 0.0582987574629249                 |
| 0.45918833366292             |   |                                    |
| ENDOD1 3.99492553707756 2    |   | 0.13567909615709 2.00439730167393  |
| SESN3 2.85079473780064 2     |   | 0.240412911610674                  |
| 0.366677522181127            |   |                                    |
| FAM76B 2.76803301074224 2    |   | 0.250570113008281                  |
| 0.220407933416513            |   |                                    |
| CEP57 2.15290401929051 2     |   | 0.34080254727881 0.173570931384015 |
| MTMR2 0.540916305106728      | 2 | 0.763029830178217                  |
| 0.231407880578531            |   |                                    |
| CCDC82 0.0687710490807356    | 2 | 0.96619893942358                   |
| 0.0445385341957778           |   |                                    |
| JRKL 7.0858135149297 2       |   | 0.028929114828713                  |
| 2.41660149412347             |   |                                    |
| CEP126 0.836068948964007     | 2 | 0.658339532119256                  |
| 1.04874270927001             |   |                                    |
| BIRC3 18.3316357152628 2     |   | 0.000104552851583506               |
| 0.502479109106177            |   |                                    |
| BIRC2 3.12464234326691 2     |   | 0.209648874964914                  |
| 0.45115941897008             |   |                                    |
| TMEM123 8.53327980469274 2   |   | 0.01402884232754 0.20396150220952  |



|                   |                    |   |                      |
|-------------------|--------------------|---|----------------------|
| AP001830.1        | 4.14400779619628   | 2 | 0.12593317144421     |
| 2.43711089057402  |                    |   |                      |
| DCUN1D5           | 0.38714641296728   | 2 | 0.824009511148248    |
| 0.113995071935267 |                    |   |                      |
| PDGFD             | 10.5783496950753   | 2 | 0.00504592219746436  |
| 0.66296204970119  |                    |   |                      |
| CASP4             | 3.12015729667186   | 2 | 0.210119544998334    |
| 0.261969863137292 |                    |   |                      |
| CASP1             | 15.9203825013996   | 2 | 0.000349086348066852 |
| 1.3141473051707   |                    |   |                      |
| CARD16            | 4.93262695149864   | 2 | 0.0848972586160874   |
| 0.612098129242417 |                    |   |                      |
| MSANTD4           | 0.145394339080933  | 2 | 0.929882384101756    |
| 0.215266946674129 |                    |   |                      |
| KBTBD3            | 0.47270923070321   | 2 | 0.789500655233825    |
| 0.206136990654103 |                    |   |                      |
| AASDHPT           | 0.639097149592099  | 2 | 0.726476913051022    |
| 0.14469587413476  |                    |   |                      |
| AP000766.1        | 3.27366299066292   | 2 | 0.194595643713461    |
| 2.05201656575027  |                    |   |                      |
| CWF19L2           | 2.54476682237001   | 2 | 0.280163081569515    |
| 0.324376130162913 |                    |   |                      |
| ALKBH8            | 1.28718637974777   | 2 | 0.525401162110855    |
| 0.793449607249453 |                    |   |                      |
| SLC35F2           | 0.166244526610847  | 2 | 0.920238628925285    |
| 0.253283508195215 |                    |   |                      |
| CUL5              | 4.73258274831219   | 2 | 0.0938280549734347   |
| 0.533241153161637 |                    |   |                      |
| ACAT1             | 2.35321743931297   | 2 | 0.308322575919407    |
| 0.336785193732494 |                    |   |                      |
| NPAT              | 5.34367434621905   | 2 | 0.0691251137819253   |
| 0.525928255954303 |                    |   |                      |
| ATM               | 23.1254658121383   | 2 | 9.51412609828672e-06 |
| 0.532956424567644 |                    |   |                      |
| DDX10             | 1.3121091896818    | 2 | 0.518894550420194    |
| 0.31437448460166  |                    |   |                      |
| RDX               | 5.64602467423548   | 2 | 0.059426659681309    |
| 0.979639974607757 |                    |   |                      |
| FDX1              | 4.7162963290056    | 2 | 0.0945952359146389   |
| 0.173397275192278 |                    |   |                      |
| COLCA1            | 3.80759269258029   | 2 | 0.149001881397111    |
| 1.9187011459757   |                    |   |                      |
| POU2AF1           | 43.4770488586815   | 2 | 3.62308738566242e-10 |
| 0.53579028354352  |                    |   |                      |
| SIK2              | 0.0734908326921651 | 2 | 0.963921502772726    |
| 0.236534509108038 |                    |   |                      |
| PPP2R1B           | 0.248844429915032  | 2 | 0.883006943427743    |
| 0.236901501440842 |                    |   |                      |
| ALG9              | 1.1237520524756    | 2 | 0.57013846520733     |
| FDXACB1           | 3.59911475865172   | 2 | 1.19491656258042     |
|                   |                    |   | 0.16537206912142     |
|                   |                    |   | 1.09870803628764     |

|            |                    |   |                      |
|------------|--------------------|---|----------------------|
| C11orf1    | 0.173100553986055  | 2 | 0.917089439126251    |
|            | 0.16117205462139   |   |                      |
| DLAT       | 10.5338879345127   | 2 | 0.00515935365880238  |
|            | 0.420734931956363  |   |                      |
| NKAPD1     | 0.35794056578182   | 2 | 0.836130746416447    |
|            | 0.167354905219664  |   |                      |
| TIMM8B     | 14.8688687609915   | 2 | 0.000590562916302773 |
|            | 0.332529010553708  |   |                      |
| SDHD       | 6.16940761019587   | 2 | 0.0457435809093093   |
|            | 0.29110584891438   |   |                      |
| BC02       | 0.253987641314954  | 2 | 0.880739114969006    |
|            | 0.335915966950103  |   |                      |
| PTS        | 4.2047132470121    | 2 | 0.122168184330297    |
|            | 0.329823451036222  |   |                      |
| AP002884.1 | 0.057980665001744  | 2 | 0.971425855679823    |
|            | 0.251715693761508  |   |                      |
| ZW10       | 0.455977149830174  | 2 | 0.796133355674684    |
|            | 0.268632494607465  |   |                      |
| USP28      | 8.76518543588351   | 2 | 0.0124929259615879   |
|            | 1.14104643264846   |   |                      |
| HTR3A      | 29.2650541644223   | 2 | 4.41747633805889e-07 |
|            | 0.513259925948972  |   |                      |
| C11orf71   | 0.990608989529338  | 2 | 0.609385324402287    |
|            | 0.37219088476081   |   |                      |
| RBM7       | 0.0465690171215397 | 2 | 0.976984483779089    |
|            | 0.0462389050662956 |   |                      |
| REX02      | 11.348901274167    | 2 | 0.00343255417639421  |
|            | 0.727988481354572  |   |                      |
| CADM1      | 4.54068963349445   | 2 | 0.103276562454346    |
|            | 1.05792775622699   |   |                      |
| BUD13      | 1.27776195857073   | 2 | 0.527882805451129    |
|            | 0.424998144551171  |   |                      |
| ZPR1       | 2.76965973127801   | 2 | 0.25036639209452     |
|            | 0.434179044418547  | 2 | 0.201146436534633    |
| SIK3       | 0.3476225646428    | 2 | 0.804857913421188    |
| PAFAH1B2   | 1.07098056217431   | 2 | 0.585382217947292    |
|            | 0.240783276310187  |   |                      |
| SIDT2      | 1.38807574694066   | 2 | 0.4995548518194      |
|            | 0.45265938764594   | 2 | 0.6021468611503      |
| PCSK7      | 0.147179294214898  | 2 | 0.293367352103285    |
| RNF214     | 1.7963748701692    | 2 | 0.40730726191548     |
| BACE1-AS   | 0.0541654431884353 | 2 | 0.464303477303031    |
|            | 0.191961504719473  | 2 | 0.973280726860885    |
| CEP164     | 0.720450344001553  | 2 | 0.69751924658241     |
|            | 0.35140743368392   |   |                      |
| IL10RA     | 28.0270774008188   | 2 | 8.20346766294833e-07 |
|            | 0.528420270978803  |   |                      |
| JAML       | 12.7917421405195   | 2 | 0.00166843190909205  |
|            | 2.11206281301077   |   |                      |
| MPZL3      | 0.704445739447709  | 2 | 0.703123399594749    |

|                    |                   |   |                      |
|--------------------|-------------------|---|----------------------|
| 0.584412442653905  |                   |   |                      |
| UBE4A              | 0.848073799221413 | 2 | 0.654399734367899    |
| 0.336220666994658  |                   |   |                      |
| ATP5MG             | 269.244359645799  | 2 | 0.63247238361374     |
| AP001267.2         | 3.55863010512528  | 2 | 0.168753695102988    |
| 3.03414145146475   |                   |   |                      |
| KMT2A              | 60.0158532821908  | 2 | 9.28146448586631e-14 |
| 1.24769384085167   |                   |   |                      |
| TMEM25             | 0.229863551356844 | 2 | 0.891426958831782    |
| 0.35446600012352   |                   |   |                      |
| IFT46              | 0.61632036389314  | 2 | 0.734797607270685    |
| 0.48506730927789   |                   |   |                      |
| ARCN1              | 0.220645017616976 | 2 | 0.895545267480662    |
| 0.13560662988366   |                   |   |                      |
| DDX6               | 0.192202946233067 | 2 | 0.908371836070712    |
| 0.0671336957933067 |                   |   |                      |
| AP004609.3         | 3.3990780134808   | 2 | 0.182767759340421    |
| 1.01093839777456   |                   |   |                      |
| CXCR5              | 2.97893698087396  | 2 | 0.225492475100902    |
| 0.319361846242719  |                   |   |                      |
| AP004609.1         | 0.343882224046768 | 2 | 0.842028757078294    |
| 0.218405074785669  |                   |   |                      |
| BCL9L              | 1.2919543993552   | 2 | 0.52415009246319     |
| 1.11943943176506   |                   |   |                      |
| AP003392.4         | 0.474134390146013 | 2 | 0.788938273471588    |
| 0.97629959225069   |                   |   |                      |
| CCDC84             | 0.280577284160678 | 2 | 0.869107338240661    |
| 0.189222142984807  |                   |   |                      |
| RPS25              | 43.875069428907   | 2 | 2.96927038512251e-10 |
| 0.242289192122137  |                   |   |                      |
| TRAPPC4            | 8.10887768545487  | 2 | 0.0173452108442047   |
| 0.497421129478218  |                   |   |                      |
| SLC37A4            | 0.301562155902813 | 2 | 0.86003595888528     |
| 0.347804579083914  |                   |   |                      |
| HYOU1              | 0.027352233831953 | 2 | 0.986416976303171    |
| 0.116072379282212  |                   |   |                      |
| VPS11              | 0.369923372832456 | 2 | 0.831136127045738    |
| 0.226312223888541  |                   |   |                      |
| HMBS               | 0.74289367262377  | 2 | 0.689735673746659    |
| 0.234269146251291  |                   |   |                      |
| H2AFX              | 1.58590702173489  | 2 | 0.452506337295434    |
| 0.393638182339123  |                   |   |                      |
| DPAGT1             | 3.89619140950378  | 2 | 0.142545261555898    |
| 0.585277300422242  |                   |   |                      |
| C2CD2L             | 2.32707987864338  | 2 | 0.312378420682831    |
| 1.79653667210056   |                   |   |                      |
| HINFP              | 2.79027762079385  | 2 | 0.247798636952633    |
| 0.622644873589315  |                   |   |                      |
| NLRX1              | 2.62427730215088  | 2 | 0.269243622046593    |
| 1.56196660343244   |                   |   |                      |
| CBL                | 5.56700803153845  | 2 | 0.0618215038830747   |

|                    |                      |                                    |
|--------------------|----------------------|------------------------------------|
| 0.767426433698218  |                      |                                    |
| RNF26              | 2.25487865700983 2   | 0.323861498449245                  |
| 0.429120746972406  |                      |                                    |
| ARHGEF12           | 2.31659097618296 2   | 0.314020977465166                  |
| 0.389354895941578  |                      |                                    |
| TBCEL              | 1.76818049165043 2   | 0.41308981256498 0.556960446680531 |
| SC5D               | 2.93015770843181 2   | 0.231059770721901                  |
| 0.29374959663215   |                      |                                    |
| AP000977.1         | 4.28879065890587 2   | 0.11713884604403                   |
| 2.35471221411346   |                      |                                    |
| SORL1              | 0.781121234335754 2  | 0.676677411167459                  |
| 0.128244807451727  |                      |                                    |
| HSPA8              | 53.0985488662855 2   | 2.94986257642904e-12               |
| 0.32339227021123   |                      |                                    |
| GRAMD1B            | 2.36459420873074 2   | 0.30657369735599 1.59364934564758  |
| ZNF202             | 2.16664636529485 2   | 0.3384688607804 1.09996173440821   |
| TBRG1              | 0.40190366217149 2   | 0.817951830456536                  |
| 0.134295197263863  |                      |                                    |
| SPA17              | 1.15946641790709 2   | 0.560047762364372                  |
| 1.07369824498165   |                      |                                    |
| NRGN               | 1.55677480130289 2   | 0.459145832898013                  |
| 0.951688683025113  |                      |                                    |
| MSANTD2            | 1.79413939467374 2   | 0.407762779144023                  |
| 0.691804413988613  |                      |                                    |
| TMEM218            | 0.0225589093034413 2 | 0.988783919896318                  |
| 0.0468610217194296 |                      |                                    |
| FEZ1               | 65.5431577583086 2   | 5.88418203051333e-15               |
| 3.87124201850332   |                      |                                    |
| EI24               | 0.0946529229397139 2 | 0.953775975652579                  |
| 0.0489037845259876 |                      |                                    |
| STT3A              | 0.650160707325754 2  | 0.722469298255191                  |
| 0.248566996062836  |                      |                                    |
| CHEK1              | 4.67407451914144 2   | 0.0966134552104253                 |
| 1.38822179952259   |                      |                                    |
| HYLS1              | 0.516681372061735 2  | 0.772332064535137                  |
| 0.283302813229372  |                      |                                    |
| PUS3               | 0.219348227816584 2  | 0.89612612275644                   |
| 0.18163011972671   |                      |                                    |
| RPUSD4             | 1.72157991719886 2   | 0.422827933790997                  |
| 0.266215870522268  |                      |                                    |
| FAM118B            | 5.12915528514911 2   | 0.0769516756908862                 |
| 0.438729710184228  |                      |                                    |
| SRPRA              | 6.73657130929769 2   | 0.034448643622499                  |
| 0.542907834250469  |                      |                                    |
| FOXRED1            | 4.07219414181723 2   | 0.130537195360795                  |
| 0.577784667148334  |                      |                                    |
| TIRAP              | 2.9054960762733 2    | 0.23392656488945 1.24156300173614  |
| DCPS               | 2.43950399442146 2   | 0.295303393908761                  |
| 0.228929742499346  |                      |                                    |
| ST3GAL4            | 1.41273261139083 2   | 0.49343393188579 1.13472266904326  |

|            |                     |   |                      |
|------------|---------------------|---|----------------------|
| ETS1       | 0.603359366095994   | 2 | 0.73957492533816     |
|            | 0.122683936426263   |   |                      |
| FLI1       | 0.00904793551783589 | 2 | 0.995486249969193    |
|            | 0.0127102428373047  |   |                      |
| KCNJ1      | 6.80893030116789    | 2 | 0.0332245854808036   |
|            | 1.80645505350261    |   |                      |
| NFRKB      | 0.274622026191811   | 2 | 0.871699074140639    |
|            | 0.199107245963529   |   |                      |
| PRDM10     | 1.07908362026136    | 2 | 0.583015322899423    |
|            | 1.21109946582775    |   |                      |
| APLP2      | 6.70804393944843    | 2 | 0.0349435292772807   |
|            | 0.423166676325412   |   |                      |
| ST14       | 47.6806245951967    | 2 | 4.42877956530197e-11 |
|            | 1.23426848503112    |   |                      |
| ZBTB44     | 3.68934236392542    | 2 | 0.158077291009393    |
|            | 0.404319249325844   |   |                      |
| AP003486.1 | 2.17968693980459    | 2 | 0.336269125826491    |
|            | 2.44352372240018    |   |                      |
| SNX19      | 1.19342949280057    | 2 | 0.550617586375116    |
|            | 0.496668869716577   |   |                      |
| NCAPD3     | 2.10487788877925    | 2 | 0.349085310349167    |
|            | 0.694215346196886   |   |                      |
| VPS26B     | 0.948155554009026   | 2 | 0.6224588377011      |
|            | 0.484138041976488   |   |                      |
| THYN1      | 19.0662993703873    | 2 | 7.24111919776504e-05 |
|            | 0.531309785057333   |   |                      |
| ACAD8      | 3.1545601893557     | 2 | 0.206536093551989    |
|            | 0.296093602211941   |   |                      |
| LARP4B     | 11.5939197151721    | 2 | 0.0030367729481926   |
|            | 1.10752729334666    |   |                      |
| GTPBP4     | 0.677805172251613   | 2 | 0.7125518581455      |
|            | 0.0598590318952213  |   |                      |
| IDI1       | 4.34098117346624    | 2 | 0.114121616624383    |
|            | 0.143418077004845   |   |                      |
| WDR37      | 1.5263853407695     | 2 | 0.466175703219564    |
|            | 0.66800157534253    |   |                      |
| PFKP       | 15.1652834779734    | 2 | 0.000509214233507249 |
|            | 0.908891106734987   |   |                      |
| PITRM1     | 3.97829580414014    | 2 | 0.13681195297396     |
|            | 0.625590093234382   |   | 0.674037531595998    |
| KLF6       | 0.0897249328535814  | 2 | 0.731399800071592    |
|            | 0.0897249328535814  |   |                      |
| NET1       | 1.44545693644479    | 2 | 0.485425978073733    |
|            | 0.224977518891191   |   |                      |
| ASB13      | 10.7427678945627    | 2 | 0.00464769469290627  |
|            | 0.417345328177395   |   |                      |
| FAM208B    | 5.32078153661043    | 2 | 0.0699208935364379   |
|            | 0.262118014512641   |   |                      |
| GDI2       | 22.9309183160285    | 2 | 1.04861086963615e-05 |
|            | 0.201750464423418   |   |                      |
| ANKRD16    | 0.167352319137818   | 2 | 0.919729053326246    |

|                               |   |                                    |
|-------------------------------|---|------------------------------------|
| 0.190210040218003             |   |                                    |
| FBH1 13.0460083941556 2       |   | 0.00146924855336794                |
| 0.683654369567388             |   |                                    |
| IL15RA 5.04261433918087 2     |   | 0.0803545011087459                 |
| 2.44412629529967              |   |                                    |
| IL2RA 4.71270893117614 2      |   | 0.0947650635509281                 |
| 1.3685522654797               |   |                                    |
| RBM17 13.6541912131815 2      |   | 0.00108400191800306                |
| 0.392166186788206             |   |                                    |
| PFKFB3 0.0797186175425967     | 2 | 0.960924623308431                  |
| 0.0884190749682478            |   |                                    |
| SFMBT2 1.99793246081639 2     |   | 0.368259940391551                  |
| 1.02776527415413              |   |                                    |
| KIN 0.0526607895564753        | 2 | 0.974013227556587                  |
| 0.0506381981103741            |   |                                    |
| ATP5F1C 19.8963685307443 2    |   | 4.78143733785297e-05               |
| 0.339854251008613             |   |                                    |
| TAF3 2.08026236688696 2       |   | 0.353408317597672                  |
| 0.323377677248284             |   |                                    |
| CELF2 0.48714423314044 2      |   | 0.783822947371347                  |
| 0.402471587074457             |   |                                    |
| USP6NL 2.03703265435178 2     |   | 0.361130342168805                  |
| 0.279053671392699             |   |                                    |
| AL512631.1 2.97195038156564 2 |   | 0.226281565348083                  |
| 0.370007902152341             |   |                                    |
| ECHDC3 0.945672222196398      | 2 | 0.623232203649663                  |
| 0.892021881654831             |   |                                    |
| UPF2 4.0619765452735 2        |   | 0.131205789962158                  |
| 0.237576754200271             |   |                                    |
| DHTKD1 8.41885602623012 2     |   | 0.014854862695164                  |
| 0.566553430770535             |   |                                    |
| SEC61A2 0.180815240935548     | 2 | 0.913558724130524                  |
| 0.368397410234976             |   |                                    |
| NUDT5 5.37594087028267 2      |   | 0.0680188480408391                 |
| 0.182580692113231             |   |                                    |
| CDC123 0.425361297190045      | 2 | 0.808414264228768                  |
| 0.0774696903931591            |   |                                    |
| CAMK1D 0.770078502726757      | 2 | 0.680423928113573                  |
| 0.531491892082211             |   |                                    |
| OPTN 0.0519666899543776       | 2 | 0.974351317317029                  |
| 0.0819479161195632            |   |                                    |
| PHYH 0.00698668827144169      | 2 | 0.996512750491962                  |
| 0.0417789788780291            |   |                                    |
| SEPHS1 0.0316870215254255     | 2 | 0.984281337439711                  |
| 0.0416722961808743            |   |                                    |
| PRPF18 0.966597555764753      | 2 | 0.616745525920717                  |
| 0.201784860200754             |   |                                    |
| FAM107B 4.51957470341643 2    |   | 0.10437267706659 0.217983095728242 |
| HSPA14 0.324841026819701      | 2 | 0.850083657791304                  |
| 0.357618404946038             |   |                                    |

|          |                     |   |                      |
|----------|---------------------|---|----------------------|
| HSPA14.1 | 0.664366368033377   | 2 | 0.717355902682125    |
|          | 0.235119222611826   |   |                      |
| SUV39H2  | 1.00849403287954    | 2 | 0.603960176335871    |
|          | 0.325068638093677   |   |                      |
| DCLRE1C  | 1.6179745730443     | 2 | 0.44530880818004     |
| MEIG1    | 0.120547684877931   | 2 | 0.206642285317662    |
|          | 0.367045924497099   |   | 0.941506673795529    |
| RPP38    | 2.2241518669833     | 2 | 0.328875528216438    |
|          | 0.322674244165887   |   |                      |
| NMT2     | 1.78790072170471    | 2 | 0.409036714341327    |
|          | 2.86063381084253    |   |                      |
| MINDY3   | 3.16978288835913    | 2 | 0.204970042600259    |
|          | 0.589150572971909   |   |                      |
| PTER     | 0.284903030453834   | 2 | 0.867229600703343    |
|          | 0.175401036462613   |   |                      |
| RSU1     | 2.61382258638913    | 2 | 0.270654739811695    |
|          | 0.245444952145879   |   |                      |
| TRDMT1   | 0.002362517263965   | 2 | 0.998819438779361    |
|          | 0.0338842744080253  |   |                      |
| VIM      | 9.86392188290581    | 2 | 0.00721234641646051  |
|          | 0.571642771788069   |   |                      |
| HACD1    | 0.331970994748649   | 2 | 0.847058518672942    |
|          | 0.24359453003845    |   |                      |
| STAM-AS1 | 4.14413926912295    | 2 | 0.125924893314993    |
|          | 4.26919066208026    |   |                      |
| STAM     | 9.46288044087212    | 2 | 0.00881376812545109  |
|          | 2.36748766008191    |   |                      |
| NSUN6    | 0.253707628598915   | 2 | 0.880862432677289    |
|          | 0.167821487093958   |   |                      |
| ARL5B    | 7.37980298277055    | 2 | 0.0249744621207718   |
|          | 2.14433250859574    |   |                      |
| MLLT10   | 1.33232012804918    | 2 | 0.513677283395994    |
|          | 0.372128799368261   |   |                      |
| DNAJC1   | 0.956918559362236   | 2 | 0.619737498768135    |
|          | 0.248108771382689   |   |                      |
| COMMD3   | 8.81852972359426    | 2 | 0.0121641173511734   |
|          | 0.452720733235519   |   |                      |
| BMI1     | 9.66028940230699    | 2 | 0.00798536569072439  |
|          | 1.23703028751985    |   |                      |
| PIP4K2A  | 46.1273160656904    | 2 | 9.62898649703448e-11 |
|          | 1.53000014247818    |   |                      |
| MSRB2    | 0.493919867989702   | 2 | 0.781171991345411    |
|          | 0.171574335472061   |   |                      |
| OTUD1    | 2.93687366787762    | 2 | 0.230285177958295    |
|          | 0.394434448578311   |   |                      |
| KIAA1217 | 9.64461528906484    | 2 | 0.00804819332407303  |
|          | 2.0819628190725     |   |                      |
| THNSL1   | 0.00539663200707215 | 2 | 0.997305321178933    |
|          | 0.0747870882954434  |   |                      |
| APBB1IP  | 7.10870823672917    | 2 | 0.0285998410642855   |

|                             |   |                                   |
|-----------------------------|---|-----------------------------------|
| 0.319764628295328           |   |                                   |
| PDSS1 5.00122873877384 2    |   | 0.0820345836019277                |
| 1.50860681051037            |   |                                   |
| ABI1 10.8446621486585 2     |   | 0.00441683865894082               |
| 0.255985828053492           |   |                                   |
| ANKRD26 3.16495548269629 2  |   | 0.205465376926889                 |
| 0.377078178316142           |   |                                   |
| YME1L1 0.128263775805577    | 2 | 0.937881296176203                 |
| 0.0707232414730391          |   |                                   |
| MASTL 0.00410571774229606   | 2 | 0.997949246802494                 |
| 0.0537702614259222          |   |                                   |
| ACBD5 0.190239383607472     | 2 | 0.909264096495073                 |
| 0.171714377689214           |   |                                   |
| RAB18 0.819771955558376     | 2 | 0.663725925325927                 |
| 0.126810155867972           |   |                                   |
| WAC-AS1 4.82513035438858 2  |   | 0.0895851976727443                |
| 0.463038023340999           |   |                                   |
| WAC 1.32769921714512 2      |   | 0.5148654839897 0.158949860274549 |
| MTPAP 0.160762583493753     | 2 | 0.922764436836719                 |
| 0.181255914725855           |   |                                   |
| MAP3K8 0.213652897319634    | 2 | 0.898681626857652                 |
| 0.0836889053914293          |   |                                   |
| ZNF438 0.0564355257190512   | 2 | 0.9721766397839                   |
| 0.177291008267421           |   |                                   |
| ZEB1-AS1 3.29729483368114 2 |   | 0.192309847848006                 |
| 0.447657246509827           |   |                                   |
| ZEB1 10.6982708287968 2     |   | 0.00475225795755252               |
| 1.01365733609512            |   |                                   |
| ARHGAP12 3.04725927162548 2 |   | 0.217919481396399                 |
| 0.838787102319489           |   |                                   |
| KIF5B 1.46310467268446 2    |   | 0.481161485590546                 |
| 0.152337041425052           |   |                                   |
| EPC1 1.87678071161397 2     |   | 0.391257113506425                 |
| 0.0885070728135991          |   |                                   |
| CCDC7 0.0316740395792605    | 2 | 0.984287726404114                 |
| 0.10739374271963            |   |                                   |
| ITGB1 24.49105753587 2      |   | 4.8065606657044e-06               |
| 0.727138203561973           |   |                                   |
| CUL2 0.9548715653191 2      |   | 0.620372122964866                 |
| 0.264283205420558           |   |                                   |
| CREM 57.744894403647 2      |   | 2.88991053309928e-13              |
| 1.10732690091249            |   |                                   |
| CCNY 0.885276224175388      | 2 | 0.642339619975616                 |
| 0.474161183732316           |   |                                   |
| ZNF248 2.06094162073655 2   |   | 0.356838917551866                 |
| 0.631349741724968           |   |                                   |
| ZNF33A 5.2692831595919 2    |   | 0.0717446795434813                |
| 0.563547325146447           |   |                                   |
| ZNF37A 1.04344454458434 2   |   | 0.593497502937237                 |
| 0.332042697889073           |   |                                   |



|            |                    |   |                     |
|------------|--------------------|---|---------------------|
| AL117339.5 | 0.145844985311484  | 2 | 0.929672883709657   |
|            | 0.108880436616904  |   |                     |
| ZNF33B     | 6.03743119490881   | 2 | 0.0488639390417831  |
|            | 0.825160369120805  |   |                     |
| BMS1       | 4.44423523417831   | 2 | 0.1083793596663     |
|            |                    |   | 0.429141126592335   |
| CSGALNACT2 | 0.0456338219994487 | 2 | 0.97744142616513    |
|            | 0.0738775687729002 |   |                     |
| HNRNPF     | 2.27894181207597   | 2 | 0.319988280902717   |
|            | 0.107753153620994  |   |                     |
| ZNF487     | 5.9005373574531    | 2 | 0.0523256452718771  |
|            | 3.86608176748605   |   |                     |
| ZNF485     | 0.31162613283299   | 2 | 0.855719138065707   |
|            | 0.60545745720761   |   |                     |
| ZNF32      | 8.30382677885357   | 2 | 0.0157342818558669  |
|            | 0.897623018622281  |   |                     |
| ZNF22      | 0.359400069806764  | 2 | 0.835520800903112   |
|            | 0.0525739693175983 |   |                     |
| OR13A1     | 2.3097551220187    | 2 | 0.315096114591886   |
|            | 1.81859121053581   |   |                     |
| ALOX5      | 32.202347001259    | 2 | 1.0170661413067e-07 |
|            | 0.678090867668437  |   |                     |
| MARCH8     | 0.0320303579833797 | 2 | 0.984112382108244   |
|            | 0.0927622796804268 |   |                     |
| ZFAND4     | 1.42565362334368   | 2 | 0.490256374386581   |
|            | 0.167761310340314  |   |                     |
| WASHC2C    | 3.12324159367618   | 2 | 0.209795759183814   |
|            | 0.357751046171805  |   |                     |
| AGAP4      | 8.76303706282439   | 2 | 0.0125063529046002  |
|            | 0.92457410772823   |   |                     |
| TIMM23     | 0.808577763825435  | 2 | 0.667451278813852   |
|            | 0.230337714878124  |   |                     |
| NCOA4      | 4.04231526322952   | 2 | 0.132501987772106   |
|            | 0.29184026159616   |   |                     |
| SYT15      | 1.13043605555482   | 2 | 0.568236241965807   |
|            | 0.3864729308232    |   |                     |
| PTPN20     | 0.136707867552147  | 2 | 0.933929865750054   |
|            | 0.296709309299099  |   |                     |
| MAPK8      | 2.51309921223162   | 2 | 0.284634435043188   |
|            | 0.49068593852046   |   |                     |
| WDFY4      | 0.420587257739355  | 2 | 0.810346269974286   |
|            | 0.159687649108373  |   |                     |
| ERCC6      | 0.0629500435361923 | 2 | 0.969015160436848   |
|            | 0.127098541936821  |   |                     |
| PARG       | 0.716125820395397  | 2 | 0.699029097564501   |
|            | 0.343235782952926  |   |                     |
| TIMM23B    | 0.752111237105487  | 2 | 0.686564146276183   |
|            | 0.473446255037295  |   |                     |
| AGAP6      | 3.79324072891225   | 2 | 0.150074961789124   |
|            | 1.40417463728339   |   |                     |
| WASHC2A    | 0.109568136374178  | 2 | 0.946689546274631   |

|                              |   |                                    |
|------------------------------|---|------------------------------------|
| 0.129222804091927            |   |                                    |
| SGMS1 5.16576215621509 2     |   | 0.0755560073822009                 |
| 0.539004888121027            |   |                                    |
| SGMS1-AS1 8.49909791199322 2 |   | 0.0142706691573479                 |
| 1.16809332832002             |   |                                    |
| CSTF2T 1.32381846711063 2    |   | 0.515865485987767                  |
| 0.366254077676405            |   |                                    |
| ZWINT 3.54081917236886 2     |   | 0.170263237072086                  |
| 0.824689672438999            |   |                                    |
| IPMK 1.41582165456255 2      |   | 0.492672400778802                  |
| 0.810020121605195            |   |                                    |
| CISD1 1.42983070279357 2     |   | 0.489233522977973                  |
| 0.184544547137853            |   |                                    |
| UBE2D1 3.78594050631051 2    |   | 0.150623753068444                  |
| 0.283864861917455            |   |                                    |
| TFAM 1.04881566317257 2      |   | 0.591905768507448                  |
| 0.0724410206975251           |   |                                    |
| SLC16A9 1.86532820778618 2   |   | 0.393503977215729                  |
| 42.2992795816703             |   |                                    |
| CCDC6 1.17805872228251 2     |   | 0.554865597548936                  |
| 0.342401917581308            |   |                                    |
| CDK1 0.327037771221037       | 2 | 0.849150462125252                  |
| 0.0926465814004879           |   |                                    |
| ARID5B 0.000618375575108934  | 2 | 0.999690860006064                  |
| 0.00287533359402002          |   |                                    |
| RTKN2 0.244853712967916      | 2 | 0.884770617810669                  |
| 0.492315847780492            |   |                                    |
| ADO 0.0827239475351683       | 2 | 0.959481759854618                  |
| 0.124163121201453            |   |                                    |
| EGR2 25.9341432047228 2      |   | 2.33599740850909e-06               |
| 5.07829150289196             |   |                                    |
| NRBF2 1.54493732109657 2     |   | 0.461871455922656                  |
| 0.137181431428761            |   |                                    |
| JMJD1C 0.706085663826545     | 2 | 0.702547101296283                  |
| 0.104853663325314            |   |                                    |
| REEP3 6.69536416614899 2     |   | 0.0351657710414354                 |
| 0.898960046536738            |   |                                    |
| SIRT1 0.0276033988877666     | 2 | 0.986293107343768                  |
| 0.0902149469747205           |   |                                    |
| HERC4 0.583528435246836      | 2 | 0.746944631592832                  |
| 0.137102650750367            |   |                                    |
| PBLD 0.154041575411502       | 2 | 0.925870606680711                  |
| 0.227111194830102            |   |                                    |
| HNRNPH3 5.24583498307001 2   |   | 0.0725907706304468                 |
| 0.27184099854431             |   |                                    |
| RUFY2 2.21624335830187 2     |   | 0.330178560263644                  |
| 0.63887887032766             |   |                                    |
| DNA2 1.69775953803775 2      |   | 0.42789400368269 1.18883794331658  |
| SLC25A16 2.96180304622078 2  |   | 0.22743256022472 0.759690749085547 |
| CCAR1 0.235012816792605      | 2 | 0.889134813799937                  |

|                              |   |                      |
|------------------------------|---|----------------------|
| 0.0644295835569494           |   |                      |
| DDX50 2.80145157095876 2     |   | 0.246418052379479    |
| 0.2057049694569              |   |                      |
| DDX21 0.0164849108922586     | 2 | 0.991791420452339    |
| 0.00916742046462278          |   |                      |
| KIF1BP 0.0226678528355103    | 2 | 0.988730060556895    |
| 0.0717377549379648           |   |                      |
| SRGN 3.46430075996678 2      |   | 0.176903590723101    |
| 0.334713869387645            |   |                      |
| VPS26A 0.00112826521282293   | 2 | 0.999436026486469    |
| 0.00596132155139425          |   |                      |
| SUPV3L1 2.06943852739813 2   |   | 0.355326119864643    |
| 0.488677019813188            |   |                      |
| HK1 3.48400519765023 2       |   | 0.175169255387802    |
| 0.38107802437199             |   |                      |
| AIFM2 5.49427638788795 2     |   | 0.064111072379439    |
| 1.03129613573908             |   |                      |
| TYSND1 0.545659688501624     | 2 | 0.761222302960992    |
| 0.193736066080548            |   |                      |
| SAR1A 0.643719767278325      | 2 | 0.724799739517223    |
| 0.142619136299658            |   |                      |
| PPA1 1.67238797491102 2      |   | 0.433356749888885    |
| 0.101327295479115            |   |                      |
| LRRC20 1.37042892104106 2    |   | 0.503982133713358    |
| 1.41810586485981             |   |                      |
| EIF4EBP2 1.37572342257237 2  |   | 0.502649731004171    |
| 0.165381609629838            |   |                      |
| PALD1 1.93303854703553 2     |   | 0.380404821521866    |
| 0.488976249735732            |   |                      |
| SGPL1 1.43422146848971 2     |   | 0.488160646211465    |
| 0.411270934479627            |   |                      |
| PCBD1 1.1481637571224 2      |   | 0.563221737448508    |
| 0.125652189465997            |   |                      |
| SLC29A3 0.000300287383467306 | 2 | 0.999849867579266    |
| 0.0101119234601496           |   |                      |
| VSIR 0.172036100464244       | 2 | 0.917577668580764    |
| 0.339280918789963            |   |                      |
| PSAP 19.3596024680726 2      |   | 6.25339321569385e-05 |
| 0.2913938442067              |   |                      |
| SPOCK2 1.15976553550179 2    |   | 0.559964008557789    |
| 1.07385953309802             |   |                      |
| ASCC1 0.0924969833540962     | 2 | 0.954804671695456    |
| 0.0634164327431971           |   |                      |
| ANAPC16 1.59799565636012 2   |   | 0.449779494659743    |
| 0.0800112638447845           |   |                      |
| DDIT4 5.27693488151847 2     |   | 0.0714707187767621   |
| 0.72244260204115             |   |                      |
| DNAJB12 1.5209623980327 2    |   | 0.467441440521232    |
| 0.139340189938318            |   |                      |
| MICU1 0.158636003169667      | 2 | 0.923746125001484    |

|                               |   |                      |
|-------------------------------|---|----------------------|
| 0.103701203668731             |   |                      |
| MCU 0.591380139068876         | 2 | 0.744017986130671    |
| 0.420349084464                |   |                      |
| P4HA1 1.16103119695388 2      |   | 0.559609758229761    |
| 0.433542760148626             |   |                      |
| NUDT13 1.51548491275113 2     |   | 0.468723396999595    |
| 1.17390695693771              |   |                      |
| ECD 4.30679522768842 2        |   | 0.116089061159353    |
| 0.619050529005614             |   |                      |
| FAM149B1 0.00361402556790225  | 2 | 0.998194618880689    |
| 0.0375696597428174            |   |                      |
| DNAJC9 2.69422286259613 2     |   | 0.259990176519404    |
| 0.236850077026173             |   |                      |
| MRPS16 0.0533592772649991     | 2 | 0.973673118816794    |
| 0.0340242099739775            |   |                      |
| AC016394.1 1.46127380715491 2 |   | 0.481602158251926    |
| 0.879622201679124             |   |                      |
| CFAP70 2.21619179882016 2     |   | 0.330187072291081    |
| 1.39106907514453              |   |                      |
| ANXA7 3.01331535493673 2      |   | 0.221649565637954    |
| 0.108192253591754             |   |                      |
| PPP3CB 1.48486054502357 2     |   | 0.475955806517396    |
| 0.239490475147396             |   |                      |
| AC073389.1 1.96093093561784 2 |   | 0.375136444267751    |
| 1.62211402105118              |   |                      |
| SEC24C 2.02197185147568 2     |   | 0.363860063666642    |
| 0.620177737108976             |   |                      |
| FUT11 2.66108656817137 2      |   | 0.264333614036904    |
| 0.738373741361007             |   |                      |
| CHCHD1 0.152410972921305      | 2 | 0.926625777943342    |
| 0.0517419125250085            |   |                      |
| ZSWIM8 0.0998145568255708     | 2 | 0.951317628091884    |
| 0.118676746899049             |   |                      |
| NDST2 0.326367169056944       | 2 | 0.849435230933       |
| 0.396551121441672             |   |                      |
| CAMK2G 6.81559112564448 2     |   | 0.0331141179679899   |
| 0.988493284221768             |   |                      |
| VCL 1.06453774382916 2        |   | 0.587271014253111    |
| 0.401099454991331             |   |                      |
| AP3M1 0.0594533189620789      | 2 | 0.970710831891013    |
| 0.0698983372564423            |   |                      |
| ADK 13.9820141069518 2        |   | 0.000920119455444235 |
| 1.06955023810935              |   |                      |
| KAT6B 11.6385049133427 2      |   | 0.00296982438759574  |
| 0.748382198799078             |   |                      |
| SAMD8 1.15284386004218 2      |   | 0.561905310453718    |
| 0.443202690802139             |   |                      |
| VDAC2 1.28941353084096 2      |   | 0.524816413865676    |
| 0.106756149407848             |   |                      |
| COMTD1 4.23409062470269 2     |   | 0.120386808946891    |

|                               |   |                                    |
|-------------------------------|---|------------------------------------|
| 0.42017298894128              |   |                                    |
| KCNMA1 8.38635004181255 2     |   | 0.0150982713642043                 |
| 2.71164324327566              |   |                                    |
| POLR3A 0.230741521111281      | 2 | 0.891035721757572                  |
| 0.235149989873759             |   |                                    |
| RPS24 111.273169765849 2      | 0 | 0.373867263832385                  |
| ZMIZ1 2.74049437638543 2      |   | 0.254044155075294                  |
| 0.667914366080494             |   |                                    |
| PPIF 0.0396858939950104       | 2 | 0.980352628540689                  |
| 0.0595178177527871            |   |                                    |
| EIF5AL1 0.476172537501924     | 2 | 0.78813469676504                   |
| 0.289763890254557             |   |                                    |
| NUTM2B-AS1 4.41458394817921 2 |   | 0.109998123317022                  |
| 0.398208391315042             |   |                                    |
| AL135925.1 2.05086931478903 2 |   | 0.358640545757406                  |
| 0.758661759979719             |   |                                    |
| TMEM254 3.3219709513422e-06   | 2 | 0.999998339015904                  |
| 0.00116294166872376           |   |                                    |
| ANXA11 2.00234931925335 2     |   | 0.367447561749735                  |
| 0.14550217382435              |   |                                    |
| FAM213A 5.02911729185471 2    |   | 0.0808986092592722                 |
| 0.594724010023724             |   |                                    |
| TSPAN14 3.43666042963614 2    |   | 0.179365399685419                  |
| 0.663719947464307             |   |                                    |
| GHITM 5.31025726086298 2      |   | 0.0702897966768277                 |
| 0.108291439934025             |   |                                    |
| CCSER2 1.02386970183157 2     |   | 0.599334832689143                  |
| 0.146303801439578             |   |                                    |
| WAPL 0.433995084574206        | 2 | 0.804931947594199                  |
| 0.0865127016410207            |   |                                    |
| BMPR1A 0.283611072399324      | 2 | 0.867789993818824                  |
| 0.383096752394485             |   |                                    |
| GLUD1 2.44108319440929 2      |   | 0.295070314382633                  |
| 0.304688442184034             |   |                                    |
| SHLD2 2.54930531005889 2      |   | 0.279528044021256                  |
| 0.290792109517656             |   |                                    |
| NUTM2A-AS1 2.39815344457717 2 |   | 0.301472426229644                  |
| 0.459046466215047             |   |                                    |
| MINPP1 1.55386698518024 2     |   | 0.459813874243458                  |
| 0.598901420313491             |   |                                    |
| ATAD1 0.595577920963224       | 2 | 0.742458011196365                  |
| 0.169034964664946             |   |                                    |
| PTEN 5.907461897834 2         |   | 0.0521447930104141                 |
| 0.392693374619652             |   |                                    |
| RNLS 1.32616169354225 2       |   | 0.51526144508705 0.425194662619077 |
| STAMBPL1 2.93135931544403 2   |   | 0.230920990895408                  |
| 0.469878329721341             |   |                                    |
| ACTA2 0.258337906238837       | 2 | 0.878825472696735                  |
| 0.109962185279964             |   |                                    |
| FAS 0.296813625080181         | 2 | 0.862080338504487                  |

|                              |                      |                   |
|------------------------------|----------------------|-------------------|
| 0.166495204261081            |                      |                   |
| LIPA 2.8775406642186 2       | 0.237219280340066    |                   |
| 0.423247452453938            |                      |                   |
| IFIT2 0.0309564021407105     | 2                    | 0.984640970637031 |
| 0.122798576688113            |                      |                   |
| IFIT5 2.91418696370742 2     | 0.232912255575904    |                   |
| 1.05729638972477             |                      |                   |
| PANK1 3.29267786499987 2     | 0.192754304934044    |                   |
| 1.19606554787981             |                      |                   |
| KIF20B 0.00166528417490477   | 2                    | 0.99916770446278  |
| 0.00883556082305185          |                      |                   |
| RPP30 2.80752393332325 2     | 0.245671017166879    |                   |
| 0.247941045839167            |                      |                   |
| PCGF5 6.76721103780079 2     | 0.0339249170317919   |                   |
| 0.463596437364198            |                      |                   |
| TNKS2-AS1 3.25398132079132 2 | 0.196520080825947    |                   |
| 0.689614726579866            |                      |                   |
| TNKS2 4.73389972241742 2     | 0.0937662907517645   |                   |
| 0.723562737010148            |                      |                   |
| FGFBP3 2.22678052442345 2    | 0.328443561599623    |                   |
| 2.10433216404734             |                      |                   |
| BTA1F1 0.140085286730774     | 2                    | 0.932354060343348 |
| 0.168162192547599            |                      |                   |
| CPEB3 1.52534415168933 2     | 0.466418454927506    |                   |
| 1.76596190166743             |                      |                   |
| MARCH5 5.97774978507188 2    | 0.0503440473345367   |                   |
| 0.395750147014765            |                      |                   |
| IDE 4.74117335565444 2       | 0.0934258992931394   |                   |
| 0.727288287420578            |                      |                   |
| KIF11 8.65784094515031 2     | 0.0131817698940696   |                   |
| 0.800096243599671            |                      |                   |
| HHEX 54.1020072469228 2      | 1.78601577971449e-12 |                   |
| 0.722180235579638            |                      |                   |
| EXOC6 0.298270893768754      | 2                    | 0.861452425949426 |
| 0.138038997201718            |                      |                   |
| CEP55 1.64805410788172 2     | 0.438661578963019    |                   |
| 1.35217933177313             |                      |                   |
| FRA10AC1 0.14467823635867 2  | 0.930215389368012    |                   |
| 0.0871598090388057           |                      |                   |
| PLCE1 4.27594971580068 2     | 0.11789335222361     | 1.2110215051339   |
| NOC3L 0.26556759070297 2     | 0.875654392194339    |                   |
| 0.131512987803447            |                      |                   |
| TBC1D12 2.17517872673421 2   | 0.337027967193936    |                   |
| 0.966048597186158            |                      |                   |
| HELLS 2.00809483542631 2     | 0.366393488568903    |                   |
| 0.237635851967175            |                      |                   |
| PDLIM1 6.27302914823473 2    | 0.0434339200956605   |                   |
| 0.411637040450994            |                      |                   |
| ALDH18A1 3.55319435516804 2  | 0.16921297039215     | 0.392675536346936 |
| TCTN3 1.5354611162916 2      | 0.464065042793451    |                   |

|                                |  |                                    |
|--------------------------------|--|------------------------------------|
| 0.296696561519456              |  |                                    |
| ENTPD1 8.31709308602815 2      |  | 0.0156302593278383                 |
| 1.13009377357783               |  |                                    |
| ENTPD1-AS1 1.71752825937344 2  |  | 0.423685379069845                  |
| 0.784649577813117              |  |                                    |
| CCNJ 2.41814037586307 2        |  | 0.298474675802347                  |
| 0.982656492961737              |  |                                    |
| ZNF518A 0.000219598994255266 2 |  | 0.999890206530617                  |
| 0.00297997944125603            |  |                                    |
| BLNK 3.32822824041952 2        |  | 0.189358332421123                  |
| 0.105627147236134              |  |                                    |
| TM9SF3 2.19909728506318 2      |  | 0.333021361459669                  |
| 0.335869204777864              |  |                                    |
| PIK3AP1 0.0042565800753835 2   |  | 0.997873973165681                  |
| 0.0129441609997789             |  |                                    |
| LCOR 3.22902289838897 2        |  | 0.198987862377739                  |
| 0.386959333595469              |  |                                    |
| ARHGAP19 0.272813038323916 2   |  | 0.872487877345506                  |
| 0.519119979554399              |  |                                    |
| FRAT1 3.31963730806865 2       |  | 0.190173464165158                  |
| 0.980799462198693              |  |                                    |
| FRAT2 0.477674063221029 2      |  | 0.787543216564849                  |
| 0.210280410598765              |  |                                    |
| RRP12 1.05527017324991 2       |  | 0.589998616721498                  |
| 0.300013502631656              |  |                                    |
| PGAM1 2.62445892855372 2       |  | 0.26921917228151 0.141976390644454 |
| EXOSC1 0.420233735020048 2     |  | 0.810489520542966                  |
| 0.102730593953022              |  |                                    |
| ZDHHC16 0.339674038939613 2    |  | 0.843802328741095                  |
| 0.144826773248938              |  |                                    |
| MMS19 1.35100800008033 2       |  | 0.508899870407199                  |
| 0.416635696779726              |  |                                    |
| UBTD1 2.74481633418536 2       |  | 0.253495763760955                  |
| 2.34948123511805               |  |                                    |
| PI4K2A 0.642097694301656 2     |  | 0.725387816996618                  |
| 0.435714674652858              |  |                                    |
| ZFYVE27 6.20079555283577 2     |  | 0.0450312864467078                 |
| 0.764447389828027              |  |                                    |
| R3HCC1L 0.00794028146822018 2  |  | 0.996037729855387                  |
| 0.0394682034241002             |  |                                    |
| HPS1 6.28069582032106 2        |  | 0.0432677419960028                 |
| 0.411478014600272              |  |                                    |
| GOT1 2.55203427974885 2        |  | 0.279146892338425                  |
| 0.179100240841813              |  |                                    |
| SLC25A28 0.0234790626309563 2  |  | 0.98832910812144                   |
| 0.0887523698442381             |  |                                    |
| CUTC 4.17264880262232 2        |  | 0.12414259662449 0.426062981390886 |
| COX15 1.69419620470431 2       |  | 0.428657047709147                  |
| 0.405123213114356              |  |                                    |
| DNMBP 3.35064257602212 2       |  | 0.187248009276016                  |

|                              |   |                    |
|------------------------------|---|--------------------|
| 1.46144903180528             |   |                    |
| ERLIN1 2.34586431608869 2    |   | 0.309458229236655  |
| 0.871336195826498            |   |                    |
| CHUK 0.0412603853235311      | 2 | 0.979581153894303  |
| 0.0895391133920162           |   |                    |
| CWF19L1 1.74819195881053 2   |   | 0.417239041921719  |
| 0.239897985340343            |   |                    |
| BLOC1S2 8.88865942751672 2   |   | 0.0117449758888658 |
| 0.225289295112947            |   |                    |
| SCD 2.42442332608911 2       |   | 0.297538496298672  |
| 1.71222087570516             |   |                    |
| NDUFB8 6.26621174429803 2    |   | 0.0435822260063082 |
| 0.143323548692322            |   |                    |
| HIF1AN 0.00845402837090788   | 2 | 0.995781907064498  |
| 0.0210998149452826           |   |                    |
| AL138762.1 0.583108728062811 | 2 | 0.747101397055128  |
| 0.682336222822015            |   |                    |
| SLF2 5.9985221177077 2       |   | 0.0498238716772924 |
| 0.779990304738988            |   |                    |
| MRPL43 4.23696660658948 2    |   | 0.120213818215283  |
| 0.302800610980893            |   |                    |
| TWINK 0.0552657700365828     | 2 | 0.972745410672806  |
| 0.116908297537548            |   |                    |
| LZTS2 0.00720972809306272    | 2 | 0.996401625675335  |
| 0.0518253345657838           |   |                    |
| BTRC 1.12075637705346 2      |   | 0.570993079978389  |
| 0.196595859323116            |   |                    |
| DPCD 0.183984613698176       | 2 | 0.912112166534645  |
| 0.228541157801453            |   |                    |
| POLL 0.253672914993852       | 2 | 0.880877721765275  |
| 0.17944420102641             |   |                    |
| FBXW4 1.09547577016679 2     |   | 0.578256414439771  |
| 0.337811761209379            |   |                    |
| NPM3 3.52520504362244 2      |   | 0.171597695447562  |
| 0.532886390479794            |   |                    |
| OGA 3.68099261533509 2       |   | 0.158738623357426  |
| 0.251523486350484            |   |                    |
| ARMH3 0.00124504125530004    | 2 | 0.999377673098114  |
| 0.0158964824961406           |   |                    |
| HPS6 0.0850120887603031      | 2 | 0.958384672662147  |
| 0.0913284846588603           |   |                    |
| LDB1 0.454345123771459       | 2 | 0.796783276001684  |
| 0.372331205173956            |   |                    |
| PPRC1 2.64024449933099 2     |   | 0.267102646760628  |
| 1.84884062990987             |   |                    |
| NOLC1 0.538993344648091      | 2 | 0.763763821076638  |
| 0.188511498962824            |   |                    |
| GBF1 0.250118026963183       | 2 | 0.882444824906538  |
| 0.231882012066435            |   |                    |
| NFKB2 4.97838226464799 2     |   | 0.0829770568970926 |



|                             |   |                      |
|-----------------------------|---|----------------------|
| 0.552594216637988           |   |                      |
| FBXL15 0.542505520898557    | 2 | 0.762423761475717    |
| 0.124264017335342           |   |                      |
| CUEDC2 1.17632226932413 2   |   | 0.555347555747279    |
| 0.182037529456018           |   |                      |
| C10orf95 1.39832007151462 2 |   | 0.497002592919478    |
| 0.700498259264337           |   |                      |
| MFSD13A 1.85726176785588 2  |   | 0.395094270157868    |
| 0.530276820205663           |   |                      |
| ACTR1A 4.71607878383977 2   |   | 0.0946055258424013   |
| 0.238215620798431           |   |                      |
| SUFU 0.0218955478845679     | 2 | 0.989111934843457    |
| 0.102127995278942           |   |                      |
| TRIM8 4.69728045293807 2    |   | 0.095498930886007    |
| 0.399374289460793           |   |                      |
| ARL3 2.19020680537723 2     |   | 0.334505016442207    |
| 0.241999098047871           |   |                      |
| SFXN2 1.0965422379609 2     |   | 0.577948150714041    |
| 0.845176673806336           |   |                      |
| WBP1L 1.95966575523463 2    |   | 0.375373826977978    |
| 0.533054384413819           |   |                      |
| BORCS7 0.242274338554147    | 2 | 0.885912431290341    |
| 0.0930940169303264          |   |                      |
| NT5C2 24.4400823508876 2    |   | 4.93064288664691e-06 |
| 1.21927365596883            |   |                      |
| INA 1.31413780095076 2      |   | 0.518368499587265    |
| 1.43531769332741            |   |                      |
| PCGF6 1.025432774258 2      |   | 0.598866613802397    |
| 0.426785616478342           |   |                      |
| TAF5 0.3262873232097 2      |   | 0.849469143547787    |
| 0.12207142958157            |   |                      |
| ATP5MD 5.11872200127918 2   |   | 0.0773541539089047   |
| 0.102322451805343           |   |                      |
| PDCD11 0.078614461293459    | 2 | 0.961455275239502    |
| 0.0958579493123247          |   |                      |
| CALHM2 0.682208049177615    | 2 | 0.710984944442957    |
| 0.63345850921522            |   |                      |
| STN1 0.0313588839410578     | 2 | 0.984442840538361    |
| 0.0580692681145263          |   |                      |
| SLK 2.08207211317879 2      |   | 0.353088672542458    |
| 0.971747550739405           |   |                      |
| SFR1 6.42170814136874 2     |   | 0.0403221605863238   |
| 0.964539678696789           |   |                      |
| GST01 2.75931717581607 2    |   | 0.251664459683796    |
| 0.234526244753883           |   |                      |
| ITPRIP 0.0832268789310741   | 2 | 0.959240513438074    |
| 0.103600951088986           |   |                      |
| XPNPEP1 16.4090463306864 2  |   | 0.000273414071803924 |
| 0.552660141259434           |   |                      |
| ADD3 3.63466959103152 2     |   | 0.162458158663381    |

|                     |                      |   |                      |
|---------------------|----------------------|---|----------------------|
| 0.406592867217787   |                      |   |                      |
| MXI1                | 0.0344233564944347   | 2 | 0.982935596527623    |
| 0.11192726515262    |                      |   |                      |
| SMNDC1              | 0.771721054487419    | 2 | 0.679865341761159    |
| 0.185165661350694   |                      |   |                      |
| DUSP5               | 8.39822859216573e-05 | 2 | 0.999958009738655    |
| 0.00811537534773716 |                      |   |                      |
| SMC3                | 1.19041491016571     | 2 | 0.551448153278176    |
| 0.13661154725167    |                      |   |                      |
| PDCD4-AS1           | 7.46440661609964     | 2 | 0.0239400304230308   |
| 0.913356741072534   |                      |   |                      |
| PDCD4               | 18.3557226569857     | 2 | 0.000103301224457897 |
| 0.403150266272761   |                      |   |                      |
| BBIP1               | 2.18639189931986     | 2 | 0.335143677963717    |
| 0.236952515863614   |                      |   |                      |
| SHOC2               | 4.51260589061148     | 2 | 0.104736988226279    |
| 0.146406344254487   |                      |   |                      |
| GPAM                | 1.60497088073035     | 2 | 0.448213570468949    |
| 1.04219062374931    |                      |   |                      |
| ACSL5               | 0.2664918349715      | 2 | 0.875249826404343    |
| 0.101930467294503   |                      |   |                      |
| AL157786.1          | 1.64501821502593     | 2 | 0.439327949369199    |
| 1.23377208790321    |                      |   |                      |
| ZDHHC6              | 0.59066131366158     | 2 | 0.744285443707575    |
| 0.151769343905523   |                      |   |                      |
| VTI1A               | 1.47052067277966     | 2 | 0.479380642502641    |
| 0.228929478379463   |                      |   |                      |
| CASP7               | 0.57604192529959     | 2 | 0.749745875414087    |
| 0.234163481788277   |                      |   |                      |
| NHLRC2              | 0.0194002751762562   | 2 | 0.990346756996025    |
| 0.0664327717091472  |                      |   |                      |
| CCDC186             | 0.00921026055370763  | 2 | 0.995405457077296    |
| 0.0202493490494554  |                      |   |                      |
| ABLIM1              | 2.06163253591162     | 2 | 0.356715666130565    |
| 0.408649451707415   |                      |   |                      |
| FAM160B1            | 2.68540953095496     | 2 | 0.261138394392113    |
| 0.772813285239543   |                      |   |                      |
| TRUB1               | 0.0212790661568987   | 2 | 0.989416866554475    |
| 0.0781757826641977  |                      |   |                      |
| HSPA12A             | 0.12543326791394     | 2 | 0.939209576086312    |
| 0.143588443500001   |                      |   |                      |
| PDZD8               | 0.0176195523738709   | 2 | 0.991228916184219    |
| 0.0626079867944333  |                      |   |                      |
| RAB11FIP2           | 0.825003291125405    | 2 | 0.661992107340416    |
| 0.220589415350334   |                      |   |                      |
| FAM204A             | 1.53042180159331     | 2 | 0.46523580202566     |
| CACUL1              | 2.09917501451654     | 2 | 0.199262560588897    |
| 0.316926376565932   |                      |   | 0.350082125667814    |
| EIF3A               | 0.0163333390273163   | 2 | 0.991866587138208    |
| 0.00939941186483631 |                      |   |                      |

|           |                   |   |                      |
|-----------|-------------------|---|----------------------|
| FAM45A    | 7.61665817447233  | 2 | 0.0221852175674783   |
|           | 0.349155139160516 |   |                      |
| SFXN4     | 7.34815897984568  | 2 | 0.0253727506490222   |
|           | 0.682679304180866 |   |                      |
| PRDX3     | 13.8059079887744  | 2 | 0.00100481282923082  |
|           | 0.408462622938125 |   |                      |
| GRK5      | 8.99795444322314  | 2 | 0.0111203643922254   |
|           | 1.14440994087048  |   |                      |
| RGS10     | 18.1883673524883  | 2 | 0.000112317185458122 |
|           | 0.547995233164061 |   |                      |
| TIAL1     | 3.00313132194017  | 2 | 0.222781087301609    |
|           | 0.119077498265502 |   |                      |
| BAG3      | 1.47921784351218  | 2 | 0.477300540883443    |
|           | 0.66662823602291  |   |                      |
| INPP5F    | 8.33947032517994  | 2 | 0.0154563530024096   |
|           | 0.749042199825898 |   |                      |
| MCMBP     | 2.24556223401892  | 2 | 0.325373632991202    |
|           | 0.37109417476833  |   |                      |
| SEC23IP   | 1.35230960127762  | 2 | 0.5085687858136      |
|           | 0.119077498265502 |   | 0.308820885802686    |
| WDR11     | 1.45359703448616  | 2 | 0.48345428571115     |
|           | 0.119077498265502 |   | 0.303415313948362    |
| ATE1      | 0.169459299918181 | 2 | 0.918760637804785    |
|           | 0.174265059747006 |   |                      |
| NSMCE4A   | 7.75868234584902  | 2 | 0.0206644349872355   |
|           | 0.283523795364683 |   |                      |
| PLEKHA1   | 4.86182311900999  | 2 | 0.087956618336426    |
|           | 1.62428128248728  |   |                      |
| FAM24B    | 0.269628732652934 | 2 | 0.873878117837341    |
|           | 0.315322670381741 |   |                      |
| C10orf88  | 1.47747761581986  | 2 | 0.477716027426927    |
|           | 0.526180737692841 |   |                      |
| PSTK      | 0.766120597897147 | 2 | 0.681771787924538    |
|           | 0.478072886821393 |   |                      |
| IKZF5     | 0.228610501001268 | 2 | 0.891985635259798    |
|           | 0.193944536667446 |   |                      |
| ACADSB    | 1.16954836708768  | 2 | 0.557231679688933    |
|           | 0.302039151232861 |   |                      |
| BUB3      | 3.79267817855309  | 2 | 0.150117180088154    |
|           | 0.113983361467384 |   |                      |
| CHST15    | 8.98993328243506  | 2 | 0.0111650530614814   |
|           | 1.4039770394848   |   |                      |
| OAT       | 0.56836035977443  | 2 | 0.752631023515526    |
|           | 0.118677558425642 |   |                      |
| LHPP      | 9.25714291702477  | 2 | 0.00976870413858222  |
|           | 0.542371640806399 |   |                      |
| FAM53B    | 0.628991705957906 | 2 | 0.73015688791471     |
|           | 0.327470869748515 |   |                      |
| EEF1AKMT2 | 2.46325491400779  | 2 | 0.291817270953667    |
|           | 0.567471152380731 |   |                      |
| ABRAXAS2  | 1.27800653900749  | 2 | 0.527818254494627    |
|           | 0.142833698381943 |   |                      |

|            |                    |   |                                    |
|------------|--------------------|---|------------------------------------|
| ZRANB1     | 0.0707634938915178 | 2 | 0.965236869689341                  |
|            | 0.134842295647737  |   |                                    |
| AL731577.1 | 0.38365040944988   | 2 | 0.825451140841464                  |
|            | 0.448586660410703  |   |                                    |
| AL158835.1 | 1.94146806321966   | 2 | 0.378804881271123                  |
|            | 1.69944628800624   |   |                                    |
| EDRF1      | 1.87261930997838   | 2 | 0.392072050028 0.563329850330548   |
| UROS       | 3.70560281488404   | 2 | 0.156797297359506                  |
|            | 0.250358833863337  |   |                                    |
| BCCIP      | 2.23508637012127   | 2 | 0.327082389206363                  |
|            | 0.197223523049562  |   |                                    |
| DHX32      | 5.95233957049581   | 2 | 0.0509877543818893                 |
|            | 0.935979855899988  |   |                                    |
| PTPRE      | 0.0544886406647832 | 2 | 0.973123458631051                  |
|            | 0.059372618210152  |   |                                    |
| MKI67      | 10.1897438621406   | 2 | 0.00612809140270365                |
|            | 1.24888313137758   |   |                                    |
| MGMT       | 25.2242587939423   | 2 | 3.3313617722186e-06                |
|            | 0.762332750684918  |   |                                    |
| C10orf143  | 3.62493361622063   | 2 | 0.163250930970924                  |
|            | 0.77162185946975   |   |                                    |
| GLRX3      | 4.46332038539898   | 2 | 0.107350060326193                  |
|            | 0.227920778401133  |   |                                    |
| PPP2R2D    | 1.88196003893058   | 2 | 0.390245200001858                  |
|            | 0.49013987518494   |   |                                    |
| BNIP3      | 0.189592622230477  | 2 | 0.909558182492927                  |
|            | 0.0948771708729661 |   |                                    |
| STK32C     | 0.965437662546079  | 2 | 0.617103309134852                  |
|            | 0.394771895079129  |   |                                    |
| LRRC27     | 4.55435855352755   | 2 | 0.102573129448084                  |
|            | 2.61164823211282   |   |                                    |
| ADAM8      | 2.94899779257513   | 2 | 0.228893397643203                  |
|            | 1.17804444057101   |   |                                    |
| TUBGCP2    | 0.333419952940802  | 2 | 0.846445064727122                  |
|            | 0.124380652163512  |   |                                    |
| ZNF511     | 0.200424721160591  | 2 | 0.904645286638082                  |
|            | 0.0895593535215511 |   |                                    |
| FUOM       | 2.32662916166535   | 2 | 0.312448825744609                  |
|            | 0.406792895317628  |   |                                    |
| ECHS1      | 3.61019085315627   | 2 | 0.16445876209142 0.139471836261124 |
| PAOX       | 10.7446390073976   | 2 | 0.00464334854566006                |
|            | 0.790626792417658  |   |                                    |
| MTG1       | 8.87668188113943   | 2 | 0.0118155249258051                 |
|            | 0.545597417927366  |   |                                    |
| KDM5A      | 0.277282262611918  | 2 | 0.870540382097961                  |
|            | 0.0821528334519154 |   |                                    |
| CCDC77     | 2.88267140101963   | 2 | 0.236611505410907                  |
|            | 0.785415690001926  |   |                                    |
| B4GALNT3   | 1.34755535512971   | 2 | 0.509779154436687                  |
|            | 0.438531046477337  |   |                                    |

|            |                     |   |                      |
|------------|---------------------|---|----------------------|
| NINJ2      | 6.07428327778596    | 2 | 0.0479718144791873   |
|            | 0.48301385025576    |   |                      |
| AC021054.1 | 0.495763751705978   | 2 | 0.780452128075214    |
|            | 0.460214207952369   |   |                      |
| WNK1       | 1.75961191968278    | 2 | 0.414863404032675    |
|            | 0.245910385443059   |   |                      |
| RAD52      | 1.54571915037452    | 2 | 0.461690938894884    |
|            | 0.549629760329749   |   |                      |
| AC004803.1 | 0.319144022458665   | 2 | 0.852508574995477    |
|            | 0.326785513454915   |   |                      |
| ERC1       | 0.00692775405504256 | 2 | 0.996542115273648    |
|            | 0.0303708527563466  |   |                      |
| ADIPOR2    | 0.841889439536755   | 2 | 0.656426387808963    |
|            | 0.246918064732649   |   |                      |
| DCP1B      | 0.510430395911967   | 2 | 0.774749755456628    |
|            | 0.279743140243819   |   |                      |
| FKBP4      | 0.0561423021398728  | 2 | 0.972319182789843    |
|            | 0.053570446518403   |   |                      |
| ITFG2-AS1  | 3.50611889310662    | 2 | 0.173243103809919    |
|            | 1.64521737241539    |   |                      |
| ITFG2      | 1.68653482566814    | 2 | 0.430302248884279    |
|            | 0.197990204222112   |   |                      |
| RHN01      | 0.094103574867844   | 2 | 0.954037989131692    |
|            | 0.0829777284131646  |   |                      |
| TULP3      | 0.396086843314433   | 2 | 0.820334232092645    |
|            | 0.395316131056404   |   |                      |
| CRACR2A    | 0.861553239396903   | 2 | 0.650004092668987    |
|            | 0.429666654399373   |   |                      |
| PARP11     | 1.39142100025916    | 2 | 0.498719981464337    |
|            | 0.415318675688213   |   |                      |
| TIGAR      | 3.87181971593685    | 2 | 0.144292923013796    |
|            | 0.245104167817325   |   |                      |
| C12orf4    | 6.56310893242127    | 2 | 0.0375698103916624   |
|            | 0.901660539814298   |   |                      |
| RAD51AP1   | 1.3434726158536     | 2 | 0.510820865021095    |
|            | 0.875860969790967   |   |                      |
| DYRK4      | 1.38521209833804    | 2 | 0.500270638914464    |
|            | 0.231592104361096   |   |                      |
| NDUFA9     | 0.00757182930375509 | 2 | 0.996221242887538    |
|            | 0.0110942021659468  |   |                      |
| CD9        | 28.4069667005882    | 2 | 6.78430801537289e-07 |
|            | 0.590472578769796   |   |                      |
| CD27       | 77.7462164018402    | 2 | 0.704001177695909    |
|            | 0.439099277102678   |   |                      |
| TAPBPL     | 1.77757379439155    | 2 | 0.411154222684086    |
|            | 0.439099277102678   |   |                      |
| VAMP1      | 0.718149385114632   | 2 | 0.698322189933366    |
|            | 0.209060868028843   |   |                      |
| MRPL51     | 2.34708042191071    | 2 | 0.309270119455677    |
|            | 0.078515984196336   |   |                      |
| NCAPD2     | 5.26164189754584    | 2 | 0.0720193137958799   |

|                             |   |                                    |
|-----------------------------|---|------------------------------------|
| 1.38154729214747            |   |                                    |
| GAPDH 17.4780980866924 2    |   | 0.000160206164611987               |
| 0.18352627541877            |   |                                    |
| IFF01 0.283803255796562     | 2 | 0.867706610410564                  |
| 0.218276115590977           |   |                                    |
| NOP2 7.80933291151731 2     |   | 0.0201476735111572                 |
| 0.417052553161019           |   |                                    |
| CHD4 0.217321550796856      | 2 | 0.897034662117541                  |
| 0.0660914957094259          |   |                                    |
| LPAR5 8.30919145972499 2    |   | 0.0156921337085292                 |
| 0.721235139552408           |   |                                    |
| ACRBP 0.183712393687309     | 2 | 0.912236322575836                  |
| 0.305615434135662           |   |                                    |
| ING4 5.42673267994197 2     |   | 0.0663131977860338                 |
| 0.426847252431146           |   |                                    |
| ZNF384 0.0259076079830445   | 2 | 0.987129735420627                  |
| 0.115539639794018           |   |                                    |
| COPS7A 0.00394839443715574  | 2 | 0.998027750226993                  |
| 0.0139690366418117          |   |                                    |
| MLF2 5.87517578035711 2     |   | 0.0529934005992302                 |
| 0.258480105879918           |   |                                    |
| PTMS 2.35047519051834 2     |   | 0.308745614478462                  |
| 0.323321512786865           |   |                                    |
| GNB3 0.874025783804392      | 2 | 0.64596310366379                   |
| 0.828647647184015           |   |                                    |
| USP5 1.40766926619138 2     |   | 0.494684727685581                  |
| 0.239827388580932           |   |                                    |
| TPI1 44.9171143025892 2     |   | 1.76348824432182e-10               |
| 0.331712968284531           |   |                                    |
| SPSB2 1.7280613974462 2     |   | 0.42145987629728 0.436969012594247 |
| LRRC23 2.51466365206108 2   |   | 0.284411875376328                  |
| 0.256384748706882           |   |                                    |
| ENO2 48.6341039577884 2     |   | 2.74940070710272e-11               |
| 1.06265830986275            |   |                                    |
| ATN1 1.26750245575581 2     |   | 0.53059767035307 0.626533785941258 |
| C12orf57 9.93720090259913 2 |   | 0.00695287211162743                |
| 0.213483004192645           |   |                                    |
| PTPN6 91.6056403832454 2    | 0 | 1.87474034179023                   |
| PHB2 7.28355610720354 2     |   | 0.0262057073644201                 |
| 0.274242737850883           |   |                                    |
| EMG1 3.1716097937214 2      |   | 0.204782897652333                  |
| 0.289999508275522           |   |                                    |
| LPCAT3 0.0952185915048319   | 2 | 0.953506253253952                  |
| 0.089967582293466           |   |                                    |
| C1RL 4.75145237124944 2     |   | 0.0929469679451613                 |
| 1.52674482929558            |   |                                    |
| C1RL-AS1 0.696829011998269  | 2 | 0.705806254645099                  |
| 0.865222352126522           |   |                                    |
| CLSTN3 0.436225927903062    | 2 | 0.804034609609613                  |
| 0.269261719484467           |   |                                    |

|           |                    |   |                      |
|-----------|--------------------|---|----------------------|
| PEX5      | 4.48833345924283   | 2 | 0.106015843440271    |
|           | 0.438491204798566  |   |                      |
| CD163L1   | 1.15729638612203   | 2 | 0.560655752867143    |
|           | 0.519405600295357  |   |                      |
| SLC2A3    | 11.0519121514431   | 2 | 0.00398205972096499  |
|           | 0.562311600033635  |   |                      |
| NECAP1    | 3.21254748507461   | 2 | 0.200633836233295    |
|           | 0.485477027503232  |   |                      |
| LINC00937 | 1.29465443981116   | 2 | 0.523442956667081    |
|           | 1.12059518296398   |   |                      |
| AICDA     | 166.598184386865   | 2 | 1.84112042556624     |
| RIMKLB    | 0.480227414249025  | 2 | 0.786538420959495    |
|           | 0.332076426354479  |   |                      |
| PHC1      | 1.27860704732181   | 2 | 0.527659798659193    |
|           | 0.740342551913903  |   |                      |
| M6PR      | 0.960433183929083  | 2 | 0.618649382808844    |
|           | 0.139980309471808  |   |                      |
| KLRG1     | 1.23868949803588   | 2 | 0.538297041725189    |
|           | 0.458328404754762  |   |                      |
| CLEC2D    | 22.2260958871644   | 2 | 1.49164199221286e-05 |
|           | 0.274679809133171  |   |                      |
| CLECL1    | 10.517764832964    | 2 | 0.00520111415128821  |
|           | 0.633345477774434  |   |                      |
| CD69      | 4.08649216950052   | 2 | 0.129607310982861    |
|           | 0.515840528991515  |   |                      |
| CLEC2B    | 0.0418052369490072 | 2 | 0.979314327049221    |
|           | 0.0785500896400181 |   |                      |
| OLR1      | 14.8492358774353   | 2 | 0.000596388690189964 |
|           | 3.30492337598533   |   |                      |
| TMEM52B   | 41.1652704788254   | 2 | 1.15099940689589e-09 |
|           | 2.948972878055     |   |                      |
| GABARAPL1 | 7.9074480822756    | 2 | 0.0191831298250392   |
|           | 0.802692366184598  |   |                      |
| MAGOHB    | 1.99945507713403   | 2 | 0.367979687787198    |
|           | 0.177477034923935  |   |                      |
| YBX3      | 1.38320044871883   | 2 | 0.500774076677255    |
|           | 0.351282191232463  |   |                      |
| PRH1      | 16.0601976931718   | 2 | 0.000325516031181805 |
|           | 0.520694369338775  |   |                      |
| SMIM10L1  | 0.042837935123151  | 2 | 0.978808789518646    |
|           | 0.0464267030724187 |   |                      |
| ETV6      | 2.2197310999524    | 2 | 0.329603273264169    |
|           | 0.87163718096006   |   |                      |
| MANSC1    | 3.08237941182672   | 2 | 0.214126202620272    |
|           | 2.05314723849167   |   |                      |
| BORCS5    | 6.53953815113378   | 2 | 0.0380152047012463   |
|           | 1.36261853953537   |   |                      |
| CREBL2    | 1.10426858529475   | 2 | 0.575719743770283    |
|           | 0.352092015985194  |   |                      |
| CDKN1B    | 4.12961642167246   | 2 | 0.126842615274427    |

|                              |   |                      |
|------------------------------|---|----------------------|
| 0.43680237567218             |   |                      |
| APOLD1 0.0186354373134455    | 2 | 0.990725556770042    |
| 0.0428866605604834           |   |                      |
| DDX47 4.33888094813176 2     |   | 0.114241520124679    |
| 1.0573192193634              |   |                      |
| GPRC5D-AS1 0.218903372411343 | 2 | 0.896325468200336    |
| 0.383772659121162            |   |                      |
| ATF7IP 1.85939799818949 2    |   | 0.394672489270975    |
| 0.315195170505506            |   |                      |
| GUCY2C 15.972526033372 2     |   | 0.000340102669545539 |
| 2.95302129257388             |   |                      |
| H2AFJ 0.594270954519365      | 2 | 0.742943353613961    |
| 0.313095978047582            |   |                      |
| WBP11 0.205322904287693      | 2 | 0.902432438338686    |
| 0.0796531462224867           |   |                      |
| C12orf60 0.992676559329542   | 2 | 0.608755676571862    |
| 1.16154549800527             |   |                      |
| ARHGDIB 25.6371298684302 2   |   | 2.70999183982212e-06 |
| 0.149700268309169            |   |                      |
| EPS8 3.11671232331584 2      |   | 0.210481785002611    |
| 1.54189910123014             |   |                      |
| STRAP 0.556411552225574      | 2 | 0.757141003950495    |
| 0.0797736940975284           |   |                      |
| DERA 4.38078801727432 2      |   | 0.111872661137725    |
| 0.355200083683472            |   |                      |
| AEBP2 0.0051582175896823     | 2 | 0.997424214248802    |
| 0.0209787868371109           |   |                      |
| PYROXD1 0.92935231289079 2   |   | 0.628338555636157    |
| 0.214361975655399            |   |                      |
| RECQL 6.53411654800538 2     |   | 0.0381183961802338   |
| 0.348584363770132            |   |                      |
| GOLT1B 7.5289491580334 2     |   | 0.0231797881833755   |
| 0.350752845212638            |   |                      |
| LDHB 22.9901010080545 2      |   | 1.01803567420511e-05 |
| 0.306401484471034            |   |                      |
| CMAS 1.48580093865415 2      |   | 0.475732066218062    |
| 0.150974099529365            |   |                      |
| C2CD5 1.05343874143431 2     |   | 0.590539135283362    |
| 0.826245289127996            |   |                      |
| ETNK1 3.80666712092638 2     |   | 0.149070853314394    |
| 0.230322523579912            |   |                      |
| SOX5 15.6113640231512 2      |   | 0.000407413461775974 |
| 2.8648494490403              |   |                      |
| BCAT1 5.68288135706887 2     |   | 0.0583415539654099   |
| 0.6828326956582              |   |                      |
| C12orf77 0.00497677274985531 | 2 | 0.997514707092002    |
| 0.00216878372505075          |   |                      |
| LRMP 126.061815852255 2      | 0 | 0.980278515166476    |
| ETFRF1 0.208099035713126     | 2 | 0.901180671781088    |
| 0.13884988816152             |   |                      |



|            |                     |   |                      |
|------------|---------------------|---|----------------------|
| KRAS       | 3.43589030641545    | 2 | 0.179434479714242    |
|            | 0.149286792294648   |   |                      |
| AC087239.1 | 0.00745660569128664 | 2 | 0.99627863864607     |
|            | 0.0603112858622194  |   |                      |
| BHLHE41    | 41.423471547719     | 2 | 1.01159680632179e-09 |
|            | 1.88398054429543    |   |                      |
| SSPN       | 53.437860774294     | 2 | 2.48956411041945e-12 |
|            | 1.33899210210456    |   |                      |
| ITPR2      | 1.86786845073114    | 2 | 0.393004496632416    |
|            | 0.404764885553142   |   |                      |
| INTS13     | 5.5980816529927     | 2 | 0.060868418008038    |
|            | 0.662478845373931   |   |                      |
| FGFR10P2   | 1.45662232988813    | 2 | 0.482723542515179    |
|            | 0.183899809203281   |   |                      |
| TM7SF3     | 3.62059035861798    | 2 | 0.163605836616648    |
|            | 0.553419009523507   |   |                      |
| MED21      | 1.45615947565847    | 2 | 0.482835270759857    |
|            | 0.265917699983687   |   |                      |
| AC092747.4 | 0.0741020070400705  | 2 | 0.963626985727389    |
|            | 0.22408822260188    |   |                      |
| STK38L     | 1.30850545610085    | 2 | 0.519830372138196    |
|            | 0.255397806155299   |   |                      |
| ARNTL2     | 0.0220706973571398  | 2 | 0.989025317419411    |
|            | 0.111393157071687   |   |                      |
| PPFIBP1    | 0.955709003654984   | 2 | 0.620112415641735    |
|            | 0.801805267587286   |   |                      |
| AC009509.1 | 0.532935007474583   | 2 | 0.766080898087825    |
|            | 0.3482427830429     |   |                      |
| MRPS35     | 2.52147411555546    | 2 | 0.283445034122544    |
|            | 0.23166283239641    |   |                      |
| KLHL42     | 5.55185570567758    | 2 | 0.0622916523811028   |
|            | 0.869898494210824   |   |                      |
| CCDC91     | 0.0331165363926217  | 2 | 0.983578066401066    |
|            | 0.0331832995857938  |   |                      |
| ERGIC2     | 1.29158613246448    | 2 | 0.524246614911833    |
|            | 0.213787744463652   |   |                      |
| OVCH1-AS1  | 0.517264343184117   | 2 | 0.772106973696839    |
|            | 0.671706009205193   |   |                      |
| IP08       | 4.33831130708795    | 2 | 0.114274063088297    |
|            | 0.97019324142615    |   |                      |
| CAPRIN2    | 2.45607440533897    | 2 | 0.292866852179919    |
|            | 0.722076626454354   |   |                      |
| DDX11      | 0.0811221552925767  | 2 | 0.960250512879106    |
|            | 0.148619826088108   |   |                      |
| SINHCAF    | 12.5229510925886    | 2 | 0.00190842774457434  |
|            | 0.446484961945942   |   |                      |
| DENND5B    | 0.234577278430979   | 2 | 0.889328461044407    |
|            | 0.0633548708284893  |   |                      |
| AMN1       | 3.52197676133244    | 2 | 0.171874902013245    |
|            | 0.489528474896578   |   |                      |

|                    |                    |   |                    |
|--------------------|--------------------|---|--------------------|
| AC023157.3         | 1.12764209382157   | 2 | 0.569030611854137  |
| 0.491308244589958  |                    |   |                    |
| LINC02422          | 0.0294283006267936 | 2 | 0.985393573792872  |
| 0.150459307461632  |                    |   |                    |
| KIAA1551           | 0.748565657497682  | 2 | 0.687782359693541  |
| 0.150962775469655  |                    |   |                    |
| AC016957.2         | 0.543058888414612  | 2 | 0.762212840384748  |
| 0.742280527680967  |                    |   |                    |
| BICD1              | 4.21248772460084   | 2 | 0.121694209248731  |
| 0.480070649522382  |                    |   |                    |
| DNM1L              | 0.676582534761018  | 2 | 0.71298758762461   |
| 0.0732975498452931 |                    |   |                    |
| YARS2              | 0.110319705758954  | 2 | 0.946333861669297  |
| 0.0726216879166169 |                    |   |                    |
| ALG10              | 1.94610565901533   | 2 | 0.377927526905588  |
| 0.794492078646749  |                    |   |                    |
| ALG10B             | 0.0778458086699917 | 2 | 0.961824858815129  |
| 0.168345427760743  |                    |   |                    |
| SLC2A13            | 1.21411337866592   | 2 | 0.544952475339559  |
| 1.16544061341236   |                    |   |                    |
| AC079630.1         | 2.91286282026429   | 2 | 0.233066511252452  |
| 8.61666190333485   |                    |   |                    |
| LRRK2              | 4.7385857935904    | 2 | 0.0935468501746513 |
| 3.3920729069974    |                    |   |                    |
| GXYLT1             | 0.229233204737216  | 2 | 0.891707957096105  |
| 0.163489620244428  |                    |   |                    |
| YAF2               | 7.43446696087487   | 2 | 0.0243011044163129 |
| 0.461943177437793  |                    |   |                    |
| PPHLN1             | 0.370495971818628  | 2 | 0.830898207253662  |
| 0.0665085173593047 |                    |   |                    |
| ZCRB1              | 8.74740660740706   | 2 | 0.0126044758274202 |
| 0.453823439516928  |                    |   |                    |
| PRICKLE1           | 1.14048533197796   | 2 | 0.565388221559302  |
| 0.6911377673725    |                    |   |                    |
| PUS7L              | 4.31721673023485   | 2 | 0.115485723223219  |
| 0.439705824018703  |                    |   |                    |
| IRAK4              | 0.479026720569876  | 2 | 0.787010758583736  |
| 0.116524101729443  |                    |   |                    |
| TWF1               | 0.134386833636945  | 2 | 0.935014336348012  |
| 0.122343060619882  |                    |   |                    |
| AN06               | 2.02042939239988   | 2 | 0.364140791534301  |
| 2.19544612026899   |                    |   |                    |
| AC008124.1         | 0.207157247385253  | 2 | 0.90160513243026   |
| 0.146241898146082  |                    |   |                    |
| ARID2              | 0.27723310294467   | 2 | 0.870561780098695  |
| 0.222679987682871  |                    |   |                    |
| SCAF11             | 1.52901028739581   | 2 | 0.465564261388162  |
| 0.105438243796579  |                    |   |                    |
| SLC38A1            | 6.23804325311894   | 2 | 0.0442003917613206 |
| 0.420168079900957  |                    |   |                    |

|            |                    |   |                      |
|------------|--------------------|---|----------------------|
| SLC38A2    | 4.79813516591581   | 2 | 0.0908025797025073   |
|            | 0.413771841636154  |   |                      |
| AMIG02     | 1.63091880860419   | 2 | 0.442436023652961    |
|            | 0.92159876841974   |   |                      |
| PCED1B     | 18.6462600818722   | 2 | 8.9333853718121e-05  |
|            | 0.814110127460244  |   |                      |
| AC008083.2 | 0.264097506659601  | 2 | 0.876298271579288    |
|            | 0.188446688812936  |   |                      |
| LINC02156  | 0.390269464837176  | 2 | 0.822723803020492    |
|            | 0.489191130359347  |   |                      |
| RPAP3      | 2.26374925367492   | 2 | 0.322428256861754    |
|            | 0.202212890844263  |   |                      |
| AC004241.1 | 0.536354305187021  | 2 | 0.764772287707503    |
|            | 0.558698541339171  |   |                      |
| SLC48A1    | 2.38670888136035   | 2 | 0.303202481560787    |
|            | 0.355263131416547  |   |                      |
| HDAC7      | 14.6842964561813   | 2 | 0.000647657708957361 |
|            | 0.590463862782096  |   |                      |
| VDR        | 9.54888056047948   | 2 | 0.00844280837186839  |
|            | 0.588996709221117  |   |                      |
| TMEM106C   | 0.721012847753093  | 2 | 0.697323095571136    |
|            | 0.269784972342765  |   |                      |
| SENP1      | 0.589698068437959  | 2 | 0.744643994743118    |
|            | 0.362904795472137  |   |                      |
| PFKM       | 0.451732615639836  | 2 | 0.797824757467141    |
|            | 0.200982731719644  |   |                      |
| ASB8       | 2.41368419631971   | 2 | 0.299140445596615    |
|            | 0.324075643127428  |   |                      |
| ZNF641     | 0.475439969254273  | 2 | 0.788423430868032    |
|            | 0.256252405756244  |   |                      |
| KANSL2     | 0.0386517647380507 | 2 | 0.98085966528243     |
|            | 0.0604256625930629 |   |                      |
| CCNT1      | 1.02796608547754   | 2 | 0.598108536259462    |
|            | 0.485257387704909  |   |                      |
| DDX23      | 0.0606639466197194 | 2 | 0.970123425001376    |
|            | 0.0654902119727058 |   |                      |
| RND1       | 1.70853648460479   | 2 | 0.425594509221842    |
|            | 0.753515301185238  |   |                      |
| FKBP11     | 11.4512024141687   | 2 | 0.00326139191451913  |
|            | 0.966725893115207  |   |                      |
| ARF3       | 0.275263090354736  | 2 | 0.871419711396748    |
|            | 0.0765043953794184 |   |                      |
| DDN-AS1    | 0.214447148127978  | 2 | 0.898324808408889    |
|            | 0.305169274400767  |   |                      |
| PRKAG1     | 0.522325336032591  | 2 | 0.770155629736499    |
|            | 0.116011336445439  |   |                      |
| KMT2D      | 0.40988411621638   | 2 | 0.814694519985604    |
|            | 0.391732282199678  |   |                      |
| RHEBL1     | 2.36108406993083   | 2 | 0.307112227912065    |
|            | 2.20343543963404   |   |                      |

|            |                    |   |                      |
|------------|--------------------|---|----------------------|
| LMBR1L     | 4.77314646007892   | 2 | 0.0919442163331055   |
|            | 0.697472881362454  |   |                      |
| AC011603.2 | 0.801497104517177  | 2 | 0.669818464204729    |
|            | 0.693740232516119  |   |                      |
| TUBA1B     | 9.03428015992467   | 2 | 0.0109202099794561   |
|            | 0.323553306441639  |   |                      |
| TUBA1A     | 3.76493901415408   | 2 | 0.152213748310786    |
|            | 0.42185743031068   |   |                      |
| TUBA1C     | 1.94338366645953   | 2 | 0.3784422350415      |
| TR0AP      | 2.1806577586681    | 2 | 0.186367246928465    |
|            | 1.05694074623471   |   | 0.336105937231054    |
| SPATS2     | 1.7191165785423    | 2 | 0.423349038836862    |
|            | 0.160298796327044  |   |                      |
| MCRS1      | 6.12909159220387   | 2 | 0.0466750370344062   |
|            | 0.315805124027378  |   |                      |
| PRPF40B    | 3.51358603035835   | 2 | 0.172597494755699    |
|            | 1.55071747118435   |   |                      |
| FMNL3      | 0.0521866882190209 | 2 | 0.974244145412064    |
|            | 0.0727079800065184 |   |                      |
| TMBIM6     | 23.2048092799297   | 2 | 9.1440730746184e-06  |
|            | 0.18341063942158   |   |                      |
| NCKAP5L    | 1.67474297483836   | 2 | 0.432846772639656    |
|            | 0.50175579960071   |   |                      |
| BCDIN3D    | 0.388168764407983  | 2 | 0.823588405131566    |
|            | 0.17024839737093   |   |                      |
| RACGAP1    | 0.0068744069430883 | 2 | 0.996568696950056    |
|            | 0.0521811534443776 |   |                      |
| SMARCD1    | 0.104854681087949  | 2 | 0.948923266799366    |
|            | 0.0627589057053739 |   |                      |
| COX14      | 46.7098561248906   | 2 | 7.19587722741721e-11 |
|            | 0.67908625193337   |   |                      |
| AC074032.1 | 8.6571414801001    | 2 | 0.0131863807939838   |
|            | 0.842777638039063  |   |                      |
| CERS5      | 2.90051733063198   | 2 | 0.234509620742714    |
|            | 0.225746754433335  |   |                      |
| LIMA1      | 2.56434185412932   | 2 | 0.277434356463171    |
|            | 0.636709396643069  |   |                      |
| LARP4      | 0.712429702576009  | 2 | 0.70032213895671     |
|            | 0.160412576824654  |   |                      |
| DIP2B      | 0.673931491800007  | 2 | 0.713933294626346    |
|            | 0.48536749269777   |   |                      |
| ATF1       | 3.69533905815527   | 2 | 0.157604030274494    |
|            | 0.356083237429334  |   |                      |
| METTL7A    | 0.15019570985349   | 2 | 0.927652706499359    |
|            | 0.0853353929599283 |   |                      |
| SLC11A2    | 2.87078171289077   | 2 | 0.238022313275841    |
|            | 1.77011927648929   |   |                      |
| LETMD1     | 0.670046259773772  | 2 | 0.715321540854886    |
|            | 0.167438372030706  |   |                      |
| TFCP2      | 0.253217351576212  | 2 | 0.881078392451688    |

|                             |   |                      |
|-----------------------------|---|----------------------|
| 0.239020248014672           |   |                      |
| DAZAP2 0.673254429891005    | 2 | 0.714175024060165    |
| 0.0721137718123068          |   |                      |
| SMAGP 6.08001790627702 2    |   | 0.0478344612237241   |
| 1.30713429645659            |   |                      |
| BIN2 0.791733396163461      | 2 | 0.673096415000692    |
| 0.231143989885127           |   |                      |
| GALNT6 4.5491652353934 2    |   | 0.102839823000968    |
| 1.46986678444501            |   |                      |
| SLC4A8 3.96259658001797 2   |   | 0.137890099710984    |
| 1.02347582428118            |   |                      |
| NR4A1 0.92789848290042 2    |   | 0.628795470403281    |
| 0.479964808148125           |   |                      |
| ATG101 5.61748823412861 2   |   | 0.0602806503137646   |
| 0.335108917861628           |   |                      |
| KRT8 0.000541078500396489   | 2 | 0.999729497342245    |
| 0.0174523434724149          |   |                      |
| EIF4B 4.0501681166852 2     |   | 0.131982748470447    |
| 0.210110672021026           |   |                      |
| SPRYD3 0.0105079556151819   | 2 | 0.994759800193479    |
| 0.0577182056679323          |   |                      |
| CSAD 0.2383711576865 2      |   | 0.887643057704142    |
| 0.227775244510424           |   |                      |
| ZNF740 3.80245320404532 2   |   | 0.149385270522701    |
| 1.59331046814467            |   |                      |
| ITGB7 7.90626560152802 2    |   | 0.0191944750194254   |
| 0.763019325902371           |   |                      |
| MFSD5 0.151357016022278     | 2 | 0.927114218446588    |
| 0.158854086063116           |   |                      |
| PFDN5 1.50362700287047 2    |   | 0.471510691606922    |
| 0.0609014855958851          |   |                      |
| C12orf10 5.94695846524932 2 |   | 0.0511251243358705   |
| 0.421505654520438           |   |                      |
| AAAS 9.51780531878526 2     |   | 0.00857501394757043  |
| 0.785723151879247           |   |                      |
| SP1 0.741149431336664       | 2 | 0.690337468847151    |
| 0.48575291096354            |   |                      |
| PRR13 0.714507850640049     | 2 | 0.699594830337259    |
| 0.0328036340517175          |   |                      |
| PCBP2 4.76155019862436 2    |   | 0.0924788694154108   |
| 0.103642581582544           |   |                      |
| MAP3K12 0.0209583793218976  | 2 | 0.989575525755831    |
| 0.0752659117484098          |   |                      |
| AC023509.4 1.9982294544875  | 2 | 0.368205259015848    |
| 1.14783275820568            |   |                      |
| TARBP2 0.00189497949551361  | 2 | 0.999052958978922    |
| 0.00093709261117925         |   |                      |
| ATF7 0.0284672575077256     | 2 | 0.985867190432096    |
| 0.0472017508944402          |   |                      |
| ATP5MC2 14.7714210048633 2  |   | 0.000620049960058711 |

|                               |   |                     |  |
|-------------------------------|---|---------------------|--|
| 0.259759174683195             |   |                     |  |
| CALCOC01 8.38926480114977 2   |   | 0.0150762834767287  |  |
| 0.65463994807805              |   |                     |  |
| SMUG1 0.0187627187289763      | 2 | 0.990662508300654   |  |
| 0.0306484245158539            |   |                     |  |
| CBX5 9.56993848079397 2       |   | 0.00835438072142514 |  |
| 0.459203566898854             |   |                     |  |
| HNRNPA1 124.86018975696 2     | 0 | 0.56584760964982    |  |
| COPZ1 5.40927088314795 2      |   | 0.0668947064307712  |  |
| 0.140593218221916             |   |                     |  |
| ZNF385A 0.447653694451667     | 2 | 0.799453549985493   |  |
| 0.316366182671319             |   |                     |  |
| GTSF1 0.301210941734606       | 2 | 0.860187000553849   |  |
| 0.0669980456117736            |   |                     |  |
| NCKAP1L 1.01397775683834 2    |   | 0.602306469045896   |  |
| 0.133881080956098             |   |                     |  |
| TESPA1 1.45573463931256 2     |   | 0.482937844639803   |  |
| 0.425396994651594             |   |                     |  |
| BLOC1S1 2.75624094393015 2    |   | 0.252051846648171   |  |
| 0.0918716196962496            |   |                     |  |
| RDH5 2.00140337591226 2       |   | 0.367621395142747   |  |
| 0.934459214963286             |   |                     |  |
| CD63 1.8164344612969 2        |   | 0.403242471928434   |  |
| 0.24055498383754              |   |                     |  |
| AC009779.2 0.0293269674662873 | 2 | 0.985443501580284   |  |
| 0.122865293692119             |   |                     |  |
| GDF11 0.0116198827167768      | 2 | 0.994206903712159   |  |
| 0.0449216770029721            |   |                     |  |
| SARNP 1.58399782741919 2      |   | 0.452938504799043   |  |
| 0.376905593564632             |   |                     |  |
| ORMDL2 2.29282380689245 2     |   | 0.317774933380124   |  |
| 0.108542791604871             |   |                     |  |
| DNAJC14 2.34810765533038 2    |   | 0.309111313940547   |  |
| 0.416216949959149             |   |                     |  |
| PYM1 0.265603204829922        | 2 | 0.875638799499825   |  |
| 0.0813723223310401            |   |                     |  |
| DGKA 1.68316724948563 2       |   | 0.431027397013157   |  |
| 0.43296668282354              |   |                     |  |
| CDK2 2.92819861442454 2       |   | 0.231286215516525   |  |
| 0.401806055757273             |   |                     |  |
| RAB5B 2.27588919736814 2      |   | 0.320477054283339   |  |
| 0.228278636872822             |   |                     |  |
| IKZF4 0.65586672585563 2      |   | 0.720411024187266   |  |
| 1.08545325237938              |   |                     |  |
| RPS26 8.43158400421657 2      |   | 0.0147606266889783  |  |
| 0.206055535143882             |   |                     |  |
| PA2G4 0.805140189087172       | 2 | 0.668599472108785   |  |
| 0.0443987671063198            |   |                     |  |
| RPL41 100.312102206419 2      | 0 | 0.297278440431922   |  |
| ZC3H10 1.55966946755702 2     |   | 0.458481776595168   |  |

|                    |                     |   |                      |
|--------------------|---------------------|---|----------------------|
| 0.592277640345558  |                     |   |                      |
| ESYT1              | 1.86774021348335    | 2 | 0.393029696347802    |
| 0.404848223359135  |                     |   |                      |
| MYL6B              | 1.45273923201737    | 2 | 0.483661684324644    |
| 0.173851297729165  |                     |   |                      |
| MYL6               | 3.17152959973999    | 2 | 0.204791108994901    |
| 0.0761565507973012 |                     |   |                      |
| SMARCC2            | 1.59212289635416    | 2 | 0.451102159146016    |
| 0.297027375950224  |                     |   |                      |
| RNF41              | 0.00485340761381685 | 2 | 0.997576238258453    |
| 0.0145908642292569 |                     |   |                      |
| NABP2              | 2.15038114428274    | 2 | 0.34123271965411     |
| ANKRD52            | 0.192506412096208   | 2 | 0.285312151411862    |
| 0.299257562474351  |                     |   | 0.908234016605209    |
| COQ10A             | 1.11162664664105    | 2 | 0.573605544660188    |
| 0.311475339090414  |                     |   |                      |
| CS                 | 4.27781985456956    | 2 | 0.117783165283562    |
| 0.580403786994793  |                     |   |                      |
| AC073896.2         | 4.76938304302156    | 2 | 0.092117391430573    |
| 0.503997656185752  |                     |   |                      |
| AC073896.3         | 2.2005845672101     | 2 | 0.332773805154874    |
| 0.826243219940867  |                     |   |                      |
| CNPY2              | 7.51974768192859    | 2 | 0.0232866780144313   |
| 0.311661514849562  |                     |   |                      |
| PAN2               | 0.468806573376939   | 2 | 0.791042734554423    |
| 0.366171576301047  |                     |   |                      |
| IL23A              | 0.00555551650522331 | 2 | 0.997226096148153    |
| 0.0520349818242834 |                     |   |                      |
| STAT2              | 9.70032186204304    | 2 | 0.00782711782179724  |
| 0.888321377033438  |                     |   |                      |
| TIMELESS           | 9.26721161217491    | 2 | 0.00971964867133468  |
| 1.00555573328107   |                     |   |                      |
| SPRYD4             | 0.831115652768426   | 2 | 0.65997202819388     |
| 0.160157551123022  |                     |   |                      |
| BAZ2A              | 2.34931957970305    | 2 | 0.308924060912787    |
| 0.363478217240066  |                     |   |                      |
| ATP5F1B            | 12.6989118558322    | 2 | 0.00174769775119366  |
| 0.121636636037422  |                     |   |                      |
| PTGES3             | 1.09529044235241    | 2 | 0.578310000421197    |
| 0.0410171555732777 |                     |   |                      |
| NACA               | 58.4866823594469    | 2 | 1.99396055222678e-13 |
| 0.326125156359505  |                     |   |                      |
| PRIM1              | 1.9106068465202     | 2 | 0.384695401309755    |
| 0.544330350289769  |                     |   |                      |
| HSD17B6            | 2.25207104159327    | 2 | 0.324316456979615    |
| 1.2227322401031    |                     |   |                      |
| ZBTB39             | 4.09189128618843    | 2 | 0.129257900324487    |
| 1.41615919505133   |                     |   |                      |
| NEMP1              | 2.56825748658471    | 2 | 0.276891722340241    |
| 1.71321582270374   |                     |   |                      |

|            |                     |   |                      |
|------------|---------------------|---|----------------------|
| NAB2       | 19.9761282899873    | 2 | 4.59450635887926e-05 |
|            | 1.70927451082327    |   |                      |
| STAT6      | 3.90448842315021    | 2 | 0.141955136481009    |
|            | 0.364485469261974   |   |                      |
| NXPH4      | 5.18243833780874    | 2 | 0.0749286337164736   |
|            | 5.02215440010221    |   |                      |
| SHMT2      | 7.25898631161157    | 2 | 0.0265296273894751   |
|            | 0.326470251262803   |   |                      |
| NDUFA4L2   | 0.355220946804496   | 2 | 0.837268498326792    |
|            | 0.282333197302894   |   |                      |
| STAC3      | 1.06061285962094    | 2 | 0.588424631201009    |
|            | 0.268733451942444   |   |                      |
| R3HDM2     | 2.14285094168181    | 2 | 0.34251991710443     |
| ARHGAP9    | 4.1486238672266     | 2 | 0.423100365709321    |
|            | 0.466546302933986   |   | 0.125642848378833    |
| MARS       | 2.55605137849318    | 2 | 0.278586774723325    |
|            | 0.330449579103892   |   |                      |
| DDIT3      | 4.08842423319521    | 2 | 0.129482166649241    |
|            | 0.484035512837513   |   |                      |
| MBD6       | 1.71052526862922    | 2 | 0.425171511788918    |
|            | 0.51149687592409    |   |                      |
| DCTN2      | 10.2470869865619    | 2 | 0.00595488437225589  |
|            | 0.321267387555356   |   |                      |
| PIP4K2C    | 0.61155748991004    | 2 | 0.7365495667365      |
| DTX3       | 2.2216834834435     | 2 | 0.257123628505488    |
|            | 0.28714786524391    |   | 0.329281674266186    |
| OS9        | 13.10043509563      | 2 | 0.0014298045136234   |
|            | 0.472532303891823   |   |                      |
| AGAP2      | 0.00402677055883326 | 2 | 0.997988640221126    |
|            | 0.0311148204258561  |   |                      |
| TSPAN31    | 0.00281514773993836 | 2 | 0.998593416297498    |
|            | 0.0127036588948148  |   |                      |
| CDK4       | 0.281177501492598   | 2 | 0.868846550731059    |
|            | 0.0873053196542844  |   |                      |
| MARCH9     | 1.4105647342486     | 2 | 0.493969073935017    |
|            | 0.239424181612264   |   |                      |
| METTL1     | 1.2577739863714     | 2 | 0.533184909316227    |
|            | 0.273210171547326   |   |                      |
| TSFM       | 0.050896815293733   | 2 | 0.974872673643558    |
|            | 0.0498150129587145  |   |                      |
| AVIL       | 0.0305770227400006  | 2 | 0.984827764603595    |
|            | 0.092846045142944   |   |                      |
| CTDSP2     | 2.12066712953924    | 2 | 0.346340264149639    |
|            | 0.19469143900697    |   |                      |
| AC084033.3 | 33.5891470157058    | 2 | 5.08404516263994e-08 |
|            | 1.30057909015752    |   |                      |
| ATP23      | 0.124211488089323   | 2 | 0.939783505027739    |
|            | 0.179336368980286   |   |                      |
| SLC16A7    | 1.17677927203561    | 2 | 0.555220672574924    |
|            | 0.368629558769534   |   |                      |



|            |                    |   |                      |
|------------|--------------------|---|----------------------|
| FAM19A2    | 2.133900139271     | 2 | 0.344056266479916    |
|            | 1.51016380897321   |   |                      |
| USP15      | 2.30770915839941   | 2 | 0.315418617114386    |
|            | 0.208751561490962  |   |                      |
| MON2       | 0.0314353247272667 | 2 | 0.984405215465034    |
|            | 0.0883428812895657 |   |                      |
| AC048341.1 | 0.0541581425252895 | 2 | 0.973284279664736    |
|            | 0.154267722244909  |   |                      |
| DPY19L2    | 0.309246333567429  | 2 | 0.856737963983938    |
|            | 0.75471375158337   |   |                      |
| RXYLT1     | 0.114770125684201  | 2 | 0.944230411309638    |
|            | 0.0832461361188325 |   |                      |
| SRGAP1     | 7.39605041880901   | 2 | 0.0247723984980281   |
|            | 0.950705723628159  |   |                      |
| C12orf66   | 3.89496655547897   | 2 | 0.142632586862024    |
|            | 1.23080277959437   |   |                      |
| XPOT       | 2.5299437934672    | 2 | 0.282247228098108    |
|            | 0.915012787480221  |   |                      |
| TBK1       | 2.84784775033523   | 2 | 0.240767419647737    |
|            | 0.330142472385768  |   |                      |
| RASSF3     | 5.91867456624773   | 2 | 0.0518532698254234   |
|            | 0.580314866125937  |   |                      |
| GNS        | 1.05012636354771   | 2 | 0.59151799003026     |
|            | 0.0563586494342083 | 2 | 0.609525259145576    |
| LEMD3      | 0.0934775671513609 | 2 | 0.972214009166239    |
| LLPH       | 0.01190126683779   | 2 | 0.994067036533638    |
|            | 0.0135110592752281 |   |                      |
| TMBIM4     | 5.23663567646122   | 2 | 0.0729254320817405   |
|            | 0.187159376929558  |   |                      |
| CAND1      | 0.37857098527951   | 2 | 0.827550213471377    |
|            | 0.119099091470242  |   |                      |
| DYRK2      | 1.8468844377478    | 2 | 0.397149609613296    |
|            | 0.342878859206202  |   |                      |
| IFNG-AS1   | 4.8559457701187    | 2 | 0.0882154743635668   |
|            | 1.01837870436179   |   |                      |
| MDM1       | 0.914984333138551  | 2 | 0.632868786541461    |
|            | 0.174033960326659  |   |                      |
| RAP1B      | 5.2906569540423    | 2 | 0.0709820339427734   |
|            | 0.143183085825255  |   |                      |
| AC090061.1 | 0.0884266598944841 | 2 | 0.956749832309565    |
|            | 0.195621200933769  |   |                      |
| NUP107     | 0.105414335097595  | 2 | 0.948657769592188    |
|            | 0.076700855742265  |   |                      |
| SLC35E3    | 27.5377528140373   | 2 | 1.04773862474872e-06 |
|            | 1.16008055902966   |   |                      |
| MDM2       | 10.3021900490961   | 2 | 0.00579305771200489  |
|            | 0.852809262190046  |   |                      |
| CPM        | 16.1329454628299   | 2 | 0.00031388849976266  |
|            | 0.737995391019411  |   |                      |
| CPSF6      | 3.61904154832118   | 2 | 0.16373258288898     |
|            |                    |   | 0.220825393176282    |

|            |                    |   |                      |
|------------|--------------------|---|----------------------|
| AC020656.1 | 0.667727032251805  | 2 | 0.716151518691043    |
|            | 0.52159147769486   |   |                      |
| YEATS4     | 1.56788773355315   | 2 | 0.456601679428054    |
|            | 0.244371196071747  |   |                      |
| FRS2       | 0.792568910850888  | 2 | 0.672815282756917    |
|            | 0.63422038125841   |   |                      |
| CCT2       | 4.87277937969169   | 2 | 0.0874760978953401   |
|            | 0.20206194712081   |   |                      |
| RAB3IP     | 1.6089023146064    | 2 | 0.447333374852767    |
|            | 0.261446200448568  |   |                      |
| MYRFL      | 0.0106171504785915 | 2 | 0.994705490345828    |
|            | 0.0814431713947605 |   |                      |
| AC025159.1 | 2.08298833853433   | 2 | 0.352926955190402    |
|            | 0.337672006250422  |   |                      |
| CNOT2      | 0.316925600400439  | 2 | 0.853454711544816    |
|            | 0.0850598497091955 |   |                      |
| KCNMB4     | 3.47340868724818   | 2 | 0.176099809786724    |
|            | 0.608954753281483  |   |                      |
| AC025569.1 | 4.29163103219632   | 2 | 0.116972605093772    |
|            | 0.52531177345123   |   |                      |
| AC083809.1 | 0.0127281920069402 | 2 | 0.993656111964293    |
|            | 0.100808888517158  |   |                      |
| ZFC3H1     | 10.5531597125652   | 2 | 0.0051098774559224   |
|            | 0.626988593331205  |   |                      |
| THAP2      | 1.81925872217651   | 2 | 0.40267344282542     |
| TMEM19     | 6.80432492937683   | 2 | 0.378232049251688    |
|            | 0.530929340126562  |   | 0.0333011794172197   |
| RAB21      | 2.91493371343611   | 2 | 0.232825308227062    |
|            | 0.383311300889638  |   |                      |
| TBC1D15    | 6.2646375755076    | 2 | 0.0436165423994838   |
|            | 0.483389273864323  |   |                      |
| ATXN7L3B   | 0.0609016542281524 | 2 | 0.970008128993575    |
|            | 0.0495941316493995 |   |                      |
| GLIPR1     | 2.80569848298378   | 2 | 0.245895349649099    |
|            | 0.28797007936976   |   |                      |
| AC121761.1 | 0.425265267898987  | 2 | 0.808453080884982    |
|            | 0.716688966949905  |   |                      |
| KRR1       | 3.48057693192382   | 2 | 0.175469776257851    |
|            | 0.246497198016167  |   |                      |
| PHLDA1     | 0.706182986647002  | 2 | 0.702512915195361    |
|            | 0.578923602558947  |   |                      |
| NAP1L1     | 66.6995941180522   | 2 | 3.33066907387547e-15 |
|            | 0.467865627769855  |   |                      |
| OSBPL8     | 14.7132628285765   | 2 | 0.000638345162225162 |
|            | 0.416571139801482  |   |                      |
| ZDHHC17    | 1.02366822708903   | 2 | 0.599395211145831    |
|            | 0.450044785847899  |   |                      |
| PAWR       | 2.4351170381747    | 2 | 0.295951846366206    |
|            | 0.318517488768796  |   |                      |
| PPP1R12A   | 0.209339014215155  | 2 | 0.900622122616493    |

|                    |                      |   |                                    |
|--------------------|----------------------|---|------------------------------------|
| 0.0501285614545973 |                      |   |                                    |
| CCDC59             | 2.7988487330319      | 2 | 0.24673895427439 0.229988091127136 |
| METTL25            | 2.85119745174839     | 2 | 0.24036450766771 0.720349892210276 |
| C12orf29           | 0.104936583202244    | 2 | 0.948884408184095                  |
| 0.0228657216943313 |                      |   |                                    |
| CEP290             | 0.978755077622006    | 2 | 0.613007849046258                  |
| 0.339202252765103  |                      |   |                                    |
| TMTC3              | 1.41113542182118     | 2 | 0.493828143036984                  |
| 1.37985021432068   |                      |   |                                    |
| DUSP6              | 0.893187598761104    | 2 | 0.639803744175686                  |
| 0.635656579346581  |                      |   |                                    |
| POC1B              | 0.000372265601999301 | 2 | 0.999813884520635                  |
| 0.006356532226674  |                      |   |                                    |
| POC1B-AS1          | 0.739859715073527    | 2 | 0.690782782143982                  |
| 0.48111992058986   |                      |   |                                    |
| ATP2B1             | 5.55191937868912     | 2 | 0.0622896692641203                 |
| 0.243726931708774  |                      |   |                                    |
| ATP2B1-AS1         | 4.51675652224055     | 2 | 0.104519851290037                  |
| 0.323830170907147  |                      |   |                                    |
| AC126178.1         | 2.01699146944997     | 2 | 0.364767273821604                  |
| 0.98059809123958   |                      |   |                                    |
| BTG1               | 9.24492611401651     | 2 | 0.00982855792500714                |
| 0.093365614223474  |                      |   |                                    |
| AC025164.1         | 2.42179978974947     | 2 | 0.297929053931944                  |
| 0.160798558302572  |                      |   |                                    |
| LINC02397          | 39.5948333835057     | 2 | 2.52401055611529e-09               |
| 2.05971035654589   |                      |   |                                    |
| PLEKHG7            | 0.144707704892442    | 2 | 0.930201683427178                  |
| 0.294921515276914  |                      |   |                                    |
| EEA1               | 3.03960404156591     | 2 | 0.218755191646925                  |
| 0.42306437516966   |                      |   |                                    |
| LINC02413          | 0.370952398197478    | 2 | 0.830708606959164                  |
| 0.244579463694268  |                      |   |                                    |
| NUDT4              | 1.14209268859496     | 2 | 0.564934013852643                  |
| 0.279974859055587  |                      |   |                                    |
| UBE2N              | 10.6290846940026     | 2 | 0.00491952967774645                |
| 0.198099162117683  |                      |   |                                    |
| MRPL42             | 10.093242168371      | 2 | 0.00643102667355333                |
| 0.346564455151579  |                      |   |                                    |
| CRADD              | 0.267905766145951    | 2 | 0.874631273570397                  |
| 0.237256623085093  |                      |   |                                    |
| CEP83              | 0.311247703065612    | 2 | 0.855881068182198                  |
| 0.365429547857605  |                      |   |                                    |
| NDUFA12            | 5.83610437552001     | 2 | 0.0540388423745517                 |
| 0.196054281080491  |                      |   |                                    |
| NR2C1              | 0.00198904208970023  | 2 | 0.999005973327303                  |
| 0.0187978716301818 |                      |   |                                    |
| FGD6               | 9.1781903370516      | 2 | 0.010162049156607                  |
| 0.846056440725025  |                      |   |                                    |
| VEZT               | 0.972992977897832    | 2 | 0.614776501790199                  |

|                              |   |                      |
|------------------------------|---|----------------------|
| 0.156730166408322            |   |                      |
| METAP2 2.71146659046612 2    |   | 0.257758212265429    |
| 0.134202883310693            |   |                      |
| USP44 1.8520334491725 2      |   | 0.396128460715546    |
| 0.753266293755285            |   |                      |
| SNRPF 28.3629431648861 2     |   | 6.93529831341522e-07 |
| 0.453290439251802            |   |                      |
| LTA4H 0.0566646472546943     | 2 | 0.97206527286085     |
| 0.0328132831541472           |   |                      |
| ELK3 1.67121805435966 2      |   | 0.433610320529914    |
| 0.21545076691238             |   |                      |
| CDK17 1.13930294730439 2     |   | 0.565722573566629    |
| 0.373560728921167            |   |                      |
| NEDD1 0.387604266110504      | 2 | 0.823820895066326    |
| 0.15089742772252             |   |                      |
| LINC02453 2.22959975323478 2 |   | 0.327980908981249    |
| 1.6164802393914              |   |                      |
| TMP0-AS1 1.01603626081032 2  |   | 0.601686862836616    |
| 0.696764727567167            |   |                      |
| TMP0 0.0356010548670552      | 2 | 0.982356966081166    |
| 0.0385164786475238           |   |                      |
| SLC25A3 5.63458710431422 2   |   | 0.0597674815836728   |
| 0.14657187607404             |   |                      |
| IKBIP 3.25606444958133 2     |   | 0.196315499067888    |
| 0.500145840081385            |   |                      |
| APAF1 0.113874303466954      | 2 | 0.944653437331918    |
| 0.119173997147028            |   |                      |
| UHRF1BP1L 0.310787512893525  | 2 | 0.856078024868738    |
| 0.257050041669329            |   |                      |
| ACTR6 1.00529617576499 2     |   | 0.604926637954909    |
| 0.100185650300699            |   |                      |
| SCYL2 3.40598654478185 2     |   | 0.182137520080886    |
| 0.366622562118189            |   |                      |
| UTP20 0.000951643877471368   | 2 | 0.99952429124657     |
| 0.013200707744022            |   |                      |
| ARL1 8.24668248166535 2      |   | 0.0161903281820722   |
| 0.521065432969423            |   |                      |
| CHPT1 16.3863209878991 2     |   | 0.000276538503384605 |
| 1.41867718153241             |   |                      |
| GNPTAB 5.61949084602745 2    |   | 0.0602203211489869   |
| 0.709081662771206            |   |                      |
| WASHC3 3.05030170446866 2    |   | 0.217588230718578    |
| 0.273703724748787            |   |                      |
| NUP37 2.95448563087845 2     |   | 0.228266193557895    |
| 0.223985881894745            |   |                      |
| PARPBP 0.822276289128768     | 2 | 0.662895349885773    |
| 0.427859476127877            |   |                      |
| HSP90B1 210.691610766965 2   | 0 | 0.966450807849151    |
| C12orf73 2.68451701873765 2  |   | 0.261254955001823    |
| 0.352241435559271            |   |                      |

|           |                     |   |                      |
|-----------|---------------------|---|----------------------|
| TDG       | 0.788434620602045   | 2 | 0.674207528079103    |
|           | 0.124136650105973   |   |                      |
| HCFC2     | 0.65622117721372    | 2 | 0.720283360167318    |
|           | 0.145236617416484   |   |                      |
| NFYB      | 0.479440600279646   | 2 | 0.786847911541914    |
|           | 0.130202447785854   |   |                      |
| TXNRD1    | 0.893530752718666   | 2 | 0.639693977999191    |
|           | 0.182530898970308   |   |                      |
| EID3      | 1.52684698286314    | 2 | 0.466068112473328    |
|           | 0.736577691198677   |   |                      |
| CHST11    | 14.2358919518384    | 2 | 0.00081042968477496  |
|           | 1.50419001439597    |   |                      |
| SLC41A2   | 0.00873429857561075 | 2 | 0.995642372842082    |
|           | 0.0949893827757071  |   |                      |
| C12orf45  | 0.947832332808406   | 2 | 0.622559441776653    |
|           | 0.207280961725361   |   |                      |
| WASHC4    | 8.35838554183714    | 2 | 0.0153108619526748   |
|           | 0.404056942540235   |   |                      |
| APPL2     | 1.01696574828286    | 2 | 0.601407297604045    |
|           | 0.611826654105889   |   |                      |
| C12orf75  | 0.571081062663643   | 2 | 0.751607876892707    |
|           | 0.102384373156424   |   |                      |
| CKAP4     | 9.45162180802486    | 2 | 0.00886352352817432  |
|           | 0.770334083786371   |   |                      |
| TCP11L2   | 1.49484303665833    | 2 | 0.473586112870198    |
|           | 0.496066102867322   |   |                      |
| POLR3B    | 1.41035832901225    | 2 | 0.494020055467411    |
|           | 1.12447342015962    |   |                      |
| RFX4      | 3.63096557140394    | 2 | 0.162759311550529    |
|           | 1.77205539993314    |   |                      |
| RIC8B     | 12.8969427650936    | 2 | 0.00158294003003023  |
|           | 0.636252361367738   |   |                      |
| TMEM263   | 1.89412339962597    | 2 | 0.38787905579759     |
|           | 0.497443221687778   |   | 0.341912106546975    |
| MTERF2    | 0.497443221687778   | 2 | 0.779797030207343    |
|           | 0.461031498686168   |   |                      |
| PWP1      | 1.25382265046065    | 2 | 0.534239346922167    |
|           | 0.128723344550049   |   |                      |
| PRDM4     | 9.4179958333072     | 2 | 0.00901380564276888  |
|           | 1.3807085792923     |   |                      |
| FICD      | 0.235153104429198   | 2 | 0.889072448676407    |
|           | 0.379071099730383   |   |                      |
| SART3     | 0.879841326979656   | 2 | 0.644087518712141    |
|           | 0.177118055686705   |   |                      |
| ISCU      | 6.85868149562291    | 2 | 0.0324082989739388   |
|           | 0.191931954871063   |   |                      |
| COR01C    | 29.123545619879     | 2 | 4.74135443684354e-07 |
|           | 2.03392746856001    |   |                      |
| USP30     | 3.83493006601476    | 2 | 0.146979077390921    |
|           | 1.23798896846069    |   |                      |
| USP30-AS1 | 1.08405948212933    | 2 | 0.581566623921359    |

|                             |   |                                    |
|-----------------------------|---|------------------------------------|
| 0.327963225826205           |   |                                    |
| ALKBH2 2.50892843128511 2   |   | 0.285228628329558                  |
| 0.479049338883861           |   |                                    |
| UNG 0.0144725582116973      | 2 | 0.992789839722783                  |
| 0.0435247465596954          |   |                                    |
| KCTD10 0.689687498705445    | 2 | 0.708331022002235                  |
| 0.262029717316732           |   |                                    |
| UBE3B 1.66271287700963 2    |   | 0.435458213247338                  |
| 0.463877023955394           |   |                                    |
| MMAB 0.900023982925178      | 2 | 0.637620505573491                  |
| 0.0909323220284859          |   |                                    |
| MVK 2.98810872646623 2      |   | 0.224460762752494                  |
| 0.34889784725299            |   |                                    |
| GLTP 0.0182199907304185     | 2 | 0.990931374919553                  |
| 0.0290651062234486          |   |                                    |
| TCHP 3.3015044388726 2      |   | 0.19190549926732 0.608757894875306 |
| GIT2 2.33411202903227 2     |   | 0.311282003339066                  |
| 0.199576611001494           |   |                                    |
| ANKRD13A 2.75890804829976 2 |   | 0.251715946377439                  |
| 0.132463116375407           |   |                                    |
| C12orf76 0.132387804030146  | 2 | 0.935949364227843                  |
| 0.149787490886384           |   |                                    |
| IFT81 3.98755189915699 2    |   | 0.13618024367374 1.04149275131126  |
| ATP2A2 7.53735478000441 2   |   | 0.023082572347946                  |
| 1.04696644515015            |   |                                    |
| ANAPC7 1.29472989155166 2   |   | 0.523423209698503                  |
| 0.192351227368636           |   |                                    |
| ARPC3 8.23310396178054 2    |   | 0.0163006225134371                 |
| 0.104643044866625           |   |                                    |
| GPN3 0.0510917869746859     | 2 | 0.974777641993806                  |
| 0.0467410435958736          |   |                                    |
| FAM216A 0.379035583042646   | 2 | 0.827357996809068                  |
| 0.183718663925773           |   |                                    |
| VPS29 2.61604803375766 2    |   | 0.270353743366441                  |
| 0.151262111077051           |   |                                    |
| PPTC7 0.0532493110633933    | 2 | 0.973726655855838                  |
| 0.0797296070708267          |   |                                    |
| TCTN1 12.1025701836491 2    |   | 0.00235483388342717                |
| 1.16590976518546            |   |                                    |
| HVCN1 16.8560003604737 2    |   | 0.000218658330694899               |
| 0.488716372066856           |   |                                    |
| PPP1CC 19.0370443249582 2   |   | 7.34781729526679e-05               |
| 0.259199577701936           |   |                                    |
| SH2B3 0.104960428016096     | 2 | 0.948873095265494                  |
| 0.221120104059093           |   |                                    |
| ATXN2 1.82689155248296 2    |   | 0.401139602543767                  |
| 0.221856201975602           |   |                                    |
| BRAP 0.403031787359156      | 2 | 0.817490584523437                  |
| 0.196314463826223           |   |                                    |
| ACAD10 2.11034843791573 2   |   | 0.34813177086828 0.643064612102035 |

|              |                      |   |                      |                    |
|--------------|----------------------|---|----------------------|--------------------|
| ALDH2        | 87.8478302440993     | 2 | 0                    | 2.00447653645077   |
| MAPKAPK5-AS1 | 7.71757482512622     | 2 | 2                    | 0.0210935618097051 |
|              | 0.568018153118735    |   |                      |                    |
| MAPKAPK5     | 1.91450670196849     | 2 | 0.383946003954178    |                    |
|              | 0.371715304192281    |   |                      |                    |
| TMEM116      | 1.919122544091       | 2 | 0.383060908643194    |                    |
|              | 0.826339411739402    |   |                      |                    |
| ERP29        | 11.5024349491505     | 2 | 0.00317890819968381  |                    |
|              | 0.247397213957784    |   |                      |                    |
| NAA25        | 0.000201706434851723 | 2 | 0.999899151868089    |                    |
|              | 0.0028464329702181   |   |                      |                    |
| TRAFD1       | 0.108487665718677    | 2 | 0.947201119584485    |                    |
|              | 0.0671139476716842   |   |                      |                    |
| HECTD4       | 0.0244326222576736   | 2 | 0.98785800506887     |                    |
|              | 0.065927346306919    |   |                      |                    |
| RPL6         | 10.5183010091574     | 2 | 0.00519971998138336  |                    |
|              | 0.120936927188634    |   |                      |                    |
| PTPN11       | 3.18391938546737     | 2 | 0.203526371516533    |                    |
|              | 0.559683593025211    |   |                      |                    |
| OAS1         | 11.2188804134938     | 2 | 0.00366311937339547  |                    |
|              | 0.938509901920783    |   |                      |                    |
| OAS2         | 1.63995283065146     | 2 | 0.440442042065601    |                    |
|              | 0.56129709281314     |   |                      |                    |
| DTX1         | 1.46551921121124     | 2 | 0.48058094462341     | 0.218697209445669  |
| RASAL1       | 7.68440409281638     | 2 | 0.021446323510546    |                    |
|              | 1.26969964899858     |   |                      |                    |
| CFAP73       | 11.1788674377971     | 2 | 0.00373714353935806  |                    |
|              | 2.09622305487893     |   |                      |                    |
| DDX54        | 17.7232551144327     | 2 | 0.000141724212087357 |                    |
|              | 0.602423084587852    |   |                      |                    |
| RITA1        | 15.1711594585752     | 2 | 0.000507720362591724 |                    |
|              | 0.671940554584686    |   |                      |                    |
| IQCD         | 6.53124748919382     | 2 | 0.038173117380657    |                    |
|              | 0.568982760461185    |   |                      |                    |
| TPCN1        | 8.50565393429266     | 2 | 0.0142239663327458   |                    |
|              | 0.92455218531913     |   |                      |                    |
| SLC8B1       | 1.3378587952688      | 2 | 0.512256707562581    |                    |
|              | 0.602435450120454    |   |                      |                    |
| PLBD2        | 2.95947665558116     | 2 | 0.227697262634803    |                    |
|              | 5.67963456298757     |   |                      |                    |
| RBM19        | 1.68347456968775     | 2 | 0.430961170388098    |                    |
|              | 0.355699333433224    |   |                      |                    |
| MED13L       | 0.233832480735327    | 2 | 0.88965970761273     |                    |
|              | 0.0727959747729466   |   |                      |                    |
| C12orf49     | 16.0256247230106     | 2 | 0.000331191976428724 |                    |
|              | 0.629453847759339    |   |                      |                    |
| RNFT2        | 4.26657938860602     | 2 | 0.118446997813151    |                    |
|              | 0.571470382971874    |   |                      |                    |
| HRK          | 44.0464573869695     | 2 | 2.72541877954779e-10 |                    |
|              | 0.704230425693218    |   |                      |                    |

|            |                      |   |                      |
|------------|----------------------|---|----------------------|
| FBXW8      | 0.0487380139924186   | 2 | 0.975925519961074    |
|            | 0.0970009894901316   |   |                      |
| TESC       | 8.70880666992662     | 2 | 0.0128501045053321   |
|            | 0.636629089477076    |   |                      |
| FBX021     | 1.74023260670769     | 2 | 0.41890282661072     |
| RFC5       | 1.75048624357037     | 2 | 0.278404599547126    |
|            | 0.593714747919336    |   | 0.416760683759093    |
| WSB2       | 0.175341540455391    | 2 | 0.916062422104389    |
|            | 0.180502287876139    |   |                      |
| VSIG10     | 1.50889313396236     | 2 | 0.470270806116537    |
|            | 1.04734207658727     |   |                      |
| PEBP1      | 6.08974959372348     | 2 | 0.0476022715682322   |
|            | 0.226824949480122    |   |                      |
| TAOK3      | 10.9743599506399     | 2 | 0.00413950122556317  |
|            | 0.40974123873691     |   |                      |
| SUDS3      | 0.747269046237691    | 2 | 0.68822839743831     |
|            | 0.0773896149510324   |   |                      |
| PRKAB1     | 2.36220054491222     | 2 | 0.306940834196244    |
|            | 0.464917269042748    |   |                      |
| BICDL1     | 3.40028921566084     | 2 | 0.182657108494662    |
|            | 0.926233010342173    |   |                      |
| RAB35      | 5.2218987063288      | 2 | 0.073464766638051    |
|            | 0.566059621280579    |   |                      |
| AC004812.2 | 0.00717273270430185  | 2 | 0.996420056978555    |
|            | 0.0485382347784436   |   |                      |
| GCN1       | 0.477713942047166    | 2 | 0.7875275135719      |
|            | 0.125574036897341    |   |                      |
| RPLP0      | 18.4959243044102     | 2 | 9.63077126826528e-05 |
|            | 0.201991549573759    |   |                      |
| PXN-AS1    | 0.0675673393079596   | 2 | 0.966780626004391    |
|            | 0.126902413101593    |   |                      |
| COX6A1     | 16.7221142148284     | 2 | 0.000233797054492113 |
|            | 0.239932747177723    |   |                      |
| TRIAP1     | 0.000360861908910307 | 2 | 0.999819585322231    |
|            | 0.00238070758473571  |   |                      |
| GATC       | 0.551553441629559    | 2 | 0.758982376810341    |
|            | 0.115917491402921    |   |                      |
| SRSF9      | 129.948395669032     | 2 | 0.681644539571583    |
| DYNLL1     | 47.8221428321636     | 2 | 4.12623268886136e-11 |
|            | 0.456562661025045    |   |                      |
| NRAV       | 5.69933505278712     | 2 | 0.0578635557821842   |
|            | 1.21941805895433     |   |                      |
| COQ5       | 1.08701849671419     | 2 | 0.580706828054198    |
|            | 0.209621128679988    |   |                      |
| RNF10      | 0.47227047096676     | 2 | 0.789673874783279    |
|            | 0.118086429791936    |   |                      |
| POP5       | 0.480916262144301    | 2 | 0.786267564938907    |
|            | 0.141810065778511    |   |                      |
| MLEC       | 2.88663582917111     | 2 | 0.236142955291139    |
|            | 0.215503026338214    |   |                      |



|            |                    |   |                      |
|------------|--------------------|---|----------------------|
| UNC119B    | 0.955027720135514  | 2 | 0.620323687808251    |
|            | 0.533277254342136  |   |                      |
| ACADS      | 4.13804526141332   | 2 | 0.126309172102504    |
|            | 1.00564799326934   |   |                      |
| SPPL3      | 0.415409953453283  | 2 | 0.812446692040766    |
|            | 0.245310439559416  |   |                      |
| C12orf43   | 1.20832453262127   | 2 | 0.546532083254222    |
|            | 0.298418664384345  |   |                      |
| P2RX4      | 1.37722604402039   | 2 | 0.50227222670012     |
| CAMKK2     | 12.0668304304732   | 2 | 0.295367119230686    |
|            | 1.49278160589501   |   | 0.00239729271144995  |
| ANAPC5     | 0.0591286992537788 | 2 | 0.970868400611691    |
|            | 0.0303001233148304 |   |                      |
| RNF34      | 0.335944678465624  | 2 | 0.845377218143672    |
|            | 0.104938125915248  |   |                      |
| KDM2B      | 3.22418032655907   | 2 | 0.199470252652877    |
|            | 0.462463873322333  |   |                      |
| ORAI1      | 2.28830272719801   | 2 | 0.31849408881299     |
| TMEM120B   | 1.19503518017983   | 2 | 0.332168249952833    |
|            | 0.429057562754193  |   | 0.550175703925498    |
| RHOF       | 0.401380467871404  | 2 | 0.818165832314174    |
|            | 0.0626187658369467 |   |                      |
| LINC01089  | 6.5303579535719    | 2 | 0.0381900993307444   |
|            | 1.76159867663014   |   |                      |
| SETD1B     | 4.68414938381698   | 2 | 0.096127995229363    |
|            | 1.18873248599702   |   |                      |
| PSMD9      | 3.92075633316992   | 2 | 0.140805163043852    |
|            | 0.256479415375944  |   |                      |
| WDR66      | 32.3240026199657   | 2 | 9.57044241634009e-08 |
|            | 0.643305864369836  |   |                      |
| AC069503.1 | 4.96889022991015   | 2 | 0.0833718034463762   |
|            | 0.547837255182061  |   |                      |
| BCL7A      | 2.49797901498724   | 2 | 0.286794454134064    |
|            | 0.0737555661781516 |   |                      |
| MLXIP      | 4.26261321057922   | 2 | 0.11868212181204     |
| VPS33A     | 0.246883196570259  | 2 | 0.762138055179676    |
|            | 0.117791185442502  |   | 0.883873259450848    |
| CLIP1      | 5.76688971504657   | 2 | 0.0559417192687607   |
|            | 0.334422498129144  |   |                      |
| ZCCHC8     | 0.247509829072713  | 2 | 0.883596370973732    |
|            | 0.154387995719644  |   |                      |
| RSRC2      | 1.06044448652588   | 2 | 0.588474170724441    |
|            | 0.0975817301861485 |   |                      |
| KNTC1      | 2.90600633545228   | 2 | 0.233866890913601    |
|            | 1.18792706014746   |   |                      |
| DENR       | 1.64419981240868   | 2 | 0.439507759727804    |
|            | 0.177053523679632  |   |                      |
| HIP1R      | 1.08878547319038   | 2 | 0.580194006970885    |
|            | 0.243869502358193  |   |                      |
| VPS37B     | 1.35656752224861   | 2 | 0.507487214684059    |

|                               |   |                                    |
|-------------------------------|---|------------------------------------|
| 0.499362891635058             |   |                                    |
| OGF0D2 2.85275496595075 2     |   | 0.240177394967621                  |
| 0.538889221986716             |   |                                    |
| ARL6IP4 14.8304128775093 2    |   | 0.000602028098343976               |
| 0.304163008446589             |   |                                    |
| MPHOSPH9 14.5028703446258 2   |   | 0.000709155897252622               |
| 1.41816217902423              |   |                                    |
| C12orf65 0.125276933412997    | 2 | 0.939282994385907                  |
| 0.0229158029402915            |   |                                    |
| SBN01 7.72354190347275 2      |   | 0.0210307221306781                 |
| 0.476306706551572             |   |                                    |
| AC137767.1 4.89136656208596 2 |   | 0.0866668968182562                 |
| 0.843124391747544             |   |                                    |
| KMT5A 0.0405149022751807      | 2 | 0.979946352524778                  |
| 0.0894906449831557            |   |                                    |
| RILPL2 2.40591647439656 2     |   | 0.300304524592496                  |
| 0.32910775191899              |   |                                    |
| SNRNP35 0.00509669037943542   | 2 | 0.997454899085456                  |
| 0.012997719833193             |   |                                    |
| TMED2 6.69204743398221 2      |   | 0.0352241371462347                 |
| 0.304239740891849             |   |                                    |
| DDX55 0.00176039119380051     | 2 | 0.999120191661615                  |
| 0.0142464604750903            |   |                                    |
| EIF2B1 0.524503761007353      | 2 | 0.769317223291638                  |
| 0.0548694844906836            |   |                                    |
| GTF2H3 1.20884923092648 2     |   | 0.546388719831768                  |
| 0.320524031410682             |   |                                    |
| ATP6V0A2 0.159875340828377    | 2 | 0.923173885639342                  |
| 0.139211590393096             |   |                                    |
| CCDC92 7.374392648766 2       |   | 0.0250421136747203                 |
| 1.39843817426365              |   |                                    |
| ZNF664 8.6981899270866 2      |   | 0.0129184990039269                 |
| 1.16238052938458              |   |                                    |
| NCOR2 0.00212285076613637     | 2 | 0.998939137729602                  |
| 0.0223675501828632            |   |                                    |
| SCARB1 0.0651804613127757     | 2 | 0.967935108470753                  |
| 0.0607629956719027            |   |                                    |
| UBC 18.1484688370974 2        |   | 0.000114580328894887               |
| 0.247478949404326             |   |                                    |
| DHX37 0.0489114611605186      | 2 | 0.975840887872069                  |
| 0.102210261166139             |   |                                    |
| BRI3BP 0.579081408595038      | 2 | 0.748607320755613                  |
| 0.0554438585910449            |   |                                    |
| AACS 3.88698910127873 2       |   | 0.14320264547492 0.701648248593833 |
| SLC15A4 7.80125266001757 2    |   | 0.0202292372987444                 |
| 0.419928002026298             |   |                                    |
| PIWIL1 1.72916896452398 2     |   | 0.421226543369414                  |
| 0.965785368812321             |   |                                    |
| STX2 1.47722306687077 2       |   | 0.477776832352677                  |
| 0.653246457187553             |   |                                    |

|            |                    |   |                      |
|------------|--------------------|---|----------------------|
| RAN        | 7.31612952513364   | 2 | 0.0257823594653185   |
|            | 0.155632587647059  |   |                      |
| SFSWAP     | 4.13641136116076   | 2 | 0.126412402557929    |
|            | 0.465130180311931  |   |                      |
| PUS1       | 0.280361011968464  | 2 | 0.869201325196916    |
|            | 0.149795514186002  |   |                      |
| EP400      | 0.912699459667496  | 2 | 0.633592212247343    |
|            | 0.327896845538111  |   |                      |
| DDX51      | 1.75136004354806   | 2 | 0.416578640791187    |
|            | 0.644837826666905  |   |                      |
| NOC4L      | 1.81603669941026   | 2 | 0.403322677147019    |
|            | 0.198320566174207  |   |                      |
| FBRSL1     | 1.79486391854749   | 2 | 0.407615088962746    |
|            | 0.903159629796349  |   |                      |
| POLE       | 0.116764393272926  | 2 | 0.943289356513598    |
|            | 0.225153340381388  |   |                      |
| PXMP2      | 19.3613189402259   | 2 | 6.24802863039564e-05 |
|            | 0.656720341461334  |   |                      |
| PGAM5      | 0.425822684277276  | 2 | 0.808227789787496    |
|            | 0.258001374620388  |   |                      |
| ANKLE2     | 2.64507511945968   | 2 | 0.266458289524202    |
|            | 0.306633487927523  |   |                      |
| GOLGA3     | 0.965722815015297  | 2 | 0.617015331140605    |
|            | 0.305168448610899  |   |                      |
| CHFR       | 0.364511971106797  | 2 | 0.833387977825331    |
|            | 0.154837962856936  |   |                      |
| ZNF605     | 0.597654903313644  | 2 | 0.74168737532231     |
|            | 0.348188226272745  |   |                      |
| ZNF26      | 0.687021345645878  | 2 | 0.709275911127812    |
|            | 0.367114110866044  |   |                      |
| ZNF84      | 1.40252290872217   | 2 | 0.495959279028141    |
|            | 0.330183670255288  |   |                      |
| ZNF140     | 1.25328450488938   | 2 | 0.534383115532681    |
|            | 0.239280136495432  |   |                      |
| ZNF891     | 0.196931850502841  | 2 | 0.906226571530753    |
|            | 0.283054197326362  |   |                      |
| ZNF10      | 0.669965214782012  | 2 | 0.715350528056391    |
|            | 0.432669760984291  |   |                      |
| ZNF268     | 0.432494914129428  | 2 | 0.805535941648307    |
|            | 0.424673489246239  |   |                      |
| MPHOSPH8   | 5.89296781016361   | 2 | 0.0525240612379551   |
|            | 0.360379723636347  |   |                      |
| PSPC1      | 0.0435154672466134 | 2 | 0.978477258478736    |
|            | 0.0353569344897103 |   |                      |
| ZMYM5      | 0.0795738727272244 | 2 | 0.960994170253634    |
|            | 0.0378088896888559 |   |                      |
| AL355001.2 | 5.55851394635473   | 2 | 0.0620846207820025   |
|            | 0.962192511899981  |   |                      |
| ZMYM2      | 1.63290021396515   | 2 | 0.441997918150368    |
|            | 0.224744471953585  |   |                      |

|           |                    |   |                      |
|-----------|--------------------|---|----------------------|
| CRYL1     | 1.29129563225695   | 2 | 0.524322767317486    |
|           | 1.1191259841683    |   |                      |
| IFT88     | 1.2709531507075    | 2 | 0.529682994295752    |
|           | 0.688142265199186  |   |                      |
| EEF1AKMT1 | 4.25689310740133   | 2 | 0.119022044669851    |
|           | 0.599257389594819  |   |                      |
| XP04      | 2.49033430059539   | 2 | 0.287892782744455    |
|           | 0.792389224822837  |   |                      |
| SAP18     | 8.42857108757657   | 2 | 0.0147828797152822   |
|           | 0.146242663474271  |   |                      |
| MRPL57    | 6.6810242350125    | 2 | 0.0354188144813131   |
|           | 0.333298689056982  |   |                      |
| ZDHHC20   | 2.26582385286043   | 2 | 0.322093975567118    |
|           | 0.856490359533837  |   |                      |
| MICU2     | 14.3556871507163   | 2 | 0.000763312093669644 |
|           | 0.572142985771357  |   |                      |
| MIPEP     | 0.686077367349883  | 2 | 0.709610760677261    |
|           | 0.423481012032435  |   |                      |
| SPATA13   | 0.0398353469501297 | 2 | 0.980279372979091    |
|           | 0.16031619084934   |   |                      |
| PARP4     | 0.106078695626085  | 2 | 0.948342696537029    |
|           | 0.137613639995939  |   |                      |
| CENPJ     | 0.545212472852686  | 2 | 0.761392537256245    |
|           | 0.541559775477869  |   |                      |
| MTMR6     | 0.608813087729578  | 2 | 0.737560954610058    |
|           | 0.274487116855753  |   |                      |
| NUP58     | 0.313272501177481  | 2 | 0.855015013467238    |
|           | 0.162040737437266  |   |                      |
| RNF6      | 0.0162817268269132 | 2 | 0.991892183677014    |
|           | 0.0345964980335927 |   |                      |
| CDK8      | 0.0321346377909799 | 2 | 0.984061071920978    |
|           | 0.102358861101075  |   |                      |
| USP12     | 0.97775233179603   | 2 | 0.613315271637459    |
|           | 0.204554473033047  |   |                      |
| USP12-AS2 | 0.161749333106639  | 2 | 0.922309280401894    |
|           | 0.266292093175738  |   |                      |
| RPL21     | 12.444523760156    | 2 | 0.00198475086789374  |
|           | 0.112378838251431  |   |                      |
| RASL11A   | 2.16397167526636   | 2 | 0.338921813233185    |
|           | 0.784625500077784  |   |                      |
| GTF3A     | 10.1686257130436   | 2 | 0.00619314120513348  |
|           | 0.237897946046481  |   |                      |
| MTIF3     | 0.399043513090259  | 2 | 0.81912239934561     |
|           | 0.0910681863033308 |   |                      |
| POLR1D    | 22.9695495707209   | 2 | 1.02855065435836e-05 |
|           | 0.438885809689647  |   |                      |
| PAN3      | 1.9273500594404    | 2 | 0.381488325720654    |
|           | 0.311540058084706  |   |                      |
| POMP      | 1.74875997531124   | 2 | 0.417120559417245    |
|           | 0.0791682545898991 |   |                      |

|           |                    |   |                      |
|-----------|--------------------|---|----------------------|
| SLC46A3   | 1.4767110763135    | 2 | 0.477899156622548    |
|           | 0.255281050106505  |   |                      |
| SLC7A1    | 1.41755008000398   | 2 | 0.492246810949464    |
|           | 0.908406126487857  |   |                      |
| UBL3      | 1.18931616516026   | 2 | 0.55175118696183     |
| KATNAL1   | 0.140373369531848  | 2 | 0.325498072223931    |
|           | 0.0946261461646931 |   | 0.932219772430442    |
| LINC00426 | 0.938480912613702  | 2 | 0.625477165143405    |
|           | 0.145111048367219  |   |                      |
| UBE2L5    | 0.984236143746875  | 2 | 0.611330180671253    |
|           | 1.14406704077342   |   |                      |
| HMGB1     | 1.7724296034834    | 2 | 0.41221311178933     |
| USPL1     | 1.28084734081335   | 2 | 0.0565031319696051   |
|           | 0.470385672017411  |   | 0.527069073164238    |
| ALOX5AP   | 22.7403990021784   | 2 | 1.15341368134292e-05 |
|           | 0.304738533566108  |   |                      |
| HSPH1     | 1.97517765122695   | 2 | 0.372473708219926    |
|           | 0.207443201199424  |   |                      |
| B3GLCT    | 0.0592869083635128 | 2 | 0.970791603536565    |
|           | 0.0687120429478143 |   |                      |
| BRCA2     | 0.661813230754329  | 2 | 0.718272241491119    |
|           | 0.423304372548555  |   |                      |
| N4BP2L1   | 0.0715797046714756 | 2 | 0.964843031689386    |
|           | 0.0147713167479085 |   |                      |
| N4BP2L2   | 0.411373566521052  | 2 | 0.814088022350154    |
|           | 0.0675007560956745 |   |                      |
| PDS5B     | 0.847021439383985  | 2 | 0.654744156973118    |
|           | 0.204054116192866  |   |                      |
| RFC3      | 0.0288344736768704 | 2 | 0.985686193862343    |
|           | 0.0697133540495598 |   |                      |
| SPART     | 1.20147242722813   | 2 | 0.548407742190314    |
|           | 0.934838782092324  |   |                      |
| RFXAP     | 0.233515129312208  | 2 | 0.889800886200392    |
|           | 0.179336967609556  |   |                      |
| SMAD9     | 6.23688479545923   | 2 | 0.0442260013187007   |
|           | 4.28966018702247   |   |                      |
| ALG5      | 0.820211040028718  | 2 | 0.663580225446964    |
|           | 0.150902906477221  |   |                      |
| EXOSC8    | 1.39567788925245   | 2 | 0.497659612532945    |
|           | 0.221219530957644  |   |                      |
| SUPT20H   | 1.49384500470298   | 2 | 0.473822498882619    |
|           | 0.316093956931326  |   |                      |
| UFM1      | 2.30711876065981   | 2 | 0.315511742078188    |
|           | 0.136482401842771  |   |                      |
| PROSER1   | 0.491119095080627  | 2 | 0.782266700349684    |
|           | 0.502065536692884  |   |                      |
| NHLRC3    | 6.2938380144153    | 2 | 0.0429843575573562   |
|           | 0.275449151431035  |   |                      |
| LHFPL6    | 17.6719861874264   | 2 | 0.000145404201997379 |
|           | 2.11384196305631   |   |                      |

|          |                     |   |                      |
|----------|---------------------|---|----------------------|
| COG6     | 2.45354007339218    | 2 | 0.293238198318642    |
|          | 0.673548253360738   |   |                      |
| FOX01    | 2.90342541874291    | 2 | 0.234168881207905    |
|          | 0.508265883896569   |   |                      |
| MRPS31   | 46.5295557269431    | 2 | 7.87472309582427e-11 |
|          | 0.422491600597321   |   |                      |
| SLC25A15 | 0.774332303342461   | 2 | 0.678978272179401    |
|          | 0.674115104804457   |   |                      |
| ELF1     | 8.02010409919699    | 2 | 0.0181324514254224   |
|          | 0.232782719301797   |   |                      |
| WBP4     | 0.736432928869769   | 2 | 0.691967379148168    |
|          | 0.142828746847885   |   |                      |
| KBTBD6   | 0.601758858546984   | 2 | 0.740167009841023    |
|          | 0.544662778969618   |   |                      |
| KBTBD7   | 2.42231562027104    | 2 | 0.297852223390615    |
|          | 0.442282498479392   |   |                      |
| MTRF1    | 1.17388047876787    | 2 | 0.55602599102075     |
| NAA16    | 1.11630843149249    | 2 | 0.376179787593999    |
|          | 0.448583076222301   |   | 0.572264366175066    |
| RGCC     | 28.812890343186     | 2 | 5.53809444969744e-07 |
|          | 1.00055514366269    |   |                      |
| VWA8     | 0.00507564270799284 | 2 | 0.997465396192188    |
|          | 0.063441615187288   |   |                      |
| AKAP11   | 2.64882563852927    | 2 | 0.265959079296811    |
|          | 0.778920685949703   |   |                      |
| EPSTI1   | 1.4919266678249     | 2 | 0.474277192498278    |
|          | 0.462960066475478   |   |                      |
| DNAJC15  | 7.64561754670151    | 2 | 0.0218662970870311   |
|          | 0.222582333997699   |   |                      |
| CCDC122  | 0.0166106232903881  | 2 | 0.991729082172579    |
|          | 0.0273533735373101  |   |                      |
| LACC1    | 0.00124316144638973 | 2 | 0.999378612418083    |
|          | 0.0201300602026865  |   |                      |
| SERP2    | 0.467063045399118   | 2 | 0.791732637796806    |
|          | 0.139474903912214   |   |                      |
| TSC22D1  | 12.172574317574     | 2 | 0.00227383565228634  |
|          | 0.453915307558301   |   |                      |
| NUFIP1   | 1.0766558746903     | 2 | 0.583723459040081    |
|          | 0.191999798925666   |   |                      |
| GPALPP1  | 0.2163203128269     | 2 | 0.897483847125471    |
|          | 0.122437381370344   |   |                      |
| GTF2F2   | 0.140165112529739   | 2 | 0.932316848132084    |
|          | 0.0690422886477108  |   |                      |
| TPT1     | 13.2726380661229    | 2 | 0.0013118472335778   |
|          | 0.15029814503963    |   |                      |
| COG3     | 1.38830757555557    | 2 | 0.499496949620629    |
|          | 0.614541789750628   |   |                      |
| ZC3H13   | 1.44250102083735    | 2 | 0.48614394761981     |
| CPB2-AS1 | 0.494120581956314   | 2 | 0.0882843037094038   |
|          | 0.778335477640282   |   | 0.781093599214581    |

|           |                    |   |                      |
|-----------|--------------------|---|----------------------|
| LCP1      | 31.6034058541219   | 2 | 1.37216903284276e-07 |
|           | 0.522488436294039  |   |                      |
| RUBCNL    | 184.124790772105   | 2 | 0 2.1700626234592    |
| LRCH1     | 1.14509885944961   | 2 | 0.564085507617449    |
|           | 0.266312346268584  |   |                      |
| ESD       | 15.4485421409113   | 2 | 0.000441968886695565 |
|           | 0.246936194570249  |   |                      |
| SUCLA2    | 3.36936221383313   | 2 | 0.185503578332867    |
|           | 0.30409367442519   |   |                      |
| LINC00562 | 2.14979073591125   | 2 | 0.341333467851178    |
|           | 1.17967696517171   |   |                      |
| NUDT15    | 0.0146141912508751 | 2 | 0.992719536291002    |
|           | 0.0546700771321159 |   |                      |
| MED4      | 10.7508790702821   | 2 | 0.00462888372927528  |
|           | 0.287403118743176  |   |                      |
| ITM2B     | 1.22451271043372   | 2 | 0.542126258604145    |
|           | 0.0809422689989069 |   |                      |
| RB1       | 2.81868728037581   | 2 | 0.244303581593864    |
|           | 0.349604450010186  |   |                      |
| RCBTB2    | 0.0696234439099014 | 2 | 0.965787235673393    |
|           | 0.0763484960595035 |   |                      |
| FNDC3A    | 0.543105030005518  | 2 | 0.762195255731062    |
|           | 0.480239776766549  |   |                      |
| CDADC1    | 0.568890844255879  | 2 | 0.752431420449163    |
|           | 0.180776533865831  |   |                      |
| CAB39L    | 1.57850311146189   | 2 | 0.454184599964996    |
|           | 0.497739054795541  |   |                      |
| SETDB2    | 1.56505747369352   | 2 | 0.457248287539955    |
|           | 0.169238073323064  |   |                      |
| PHF11     | 1.07033114276789   | 2 | 0.585572328097181    |
|           | 0.172512306340726  |   |                      |
| RCBTB1    | 1.62339072964008   | 2 | 0.444104508465704    |
|           | 0.689753451073705  |   |                      |
| ARL11     | 0.997569642525419  | 2 | 0.607268150874869    |
|           | 0.271631602253157  |   |                      |
| EBPL      | 0.786193241941007  | 2 | 0.674963528804225    |
|           | 0.207128542029631  |   |                      |
| KPNA3     | 2.97309714363701   | 2 | 0.226151856979501    |
|           | 0.363733784304801  |   |                      |
| SPRYD7    | 1.33503163361498   | 2 | 0.512981335862519    |
|           | 0.401788208488563  |   |                      |
| DLEU2     | 3.44943299683053   | 2 | 0.178223571276274    |
|           | 0.53091301799369   |   |                      |
| TRIM13    | 10.5554516361737   | 2 | 0.00510402508547025  |
|           | 0.572171008736103  |   |                      |
| RNASEH2B  | 2.31104522603959   | 2 | 0.314892926750095    |
|           | 0.232668448548772  |   |                      |
| INTS6     | 2.44384788350047   | 2 | 0.294662707334578    |
|           | 0.172043910551705  |   |                      |
| INTS6-AS1 | 0.803619291626268  | 2 | 0.669108101097155    |

|            |                     |   |                                   |
|------------|---------------------|---|-----------------------------------|
|            | 0.21119778229111    |   |                                   |
| WDFY2      | 4.03199589462823 2  |   | 0.133187422992234                 |
|            | 0.892970880744853   |   |                                   |
| DHRS12     | 5.5702834875793 2   |   | 0.0617203399360274                |
|            | 0.807896435064545   |   |                                   |
| AL162377.1 | 1.54026423671944 2  |   | 0.462951899824944                 |
|            | 0.711816632559725   |   |                                   |
| ALG11      | 2.54357106827481 2  |   | 0.280330634728673                 |
|            | 1.23656983796417    |   |                                   |
| UTP14C     | 0.684428206307491   | 2 | 0.710196133198368                 |
|            | 0.580152782937597   |   |                                   |
| NEK5       | 0.279587201578479   | 2 | 0.869537688771341                 |
|            | 0.436053114592496   |   |                                   |
| NEK3       | 2.24029690311067 2  |   | 0.32623136147513 1.43841561942943 |
| VPS36      | 17.2376222076399 2  |   | 0.000180674930796987              |
|            | 1.12015143710909    |   |                                   |
| AL359513.1 | 0.190724241265361   | 2 | 0.909043691382315                 |
|            | 0.311954689536824   |   |                                   |
| CKAP2      | 3.07087161334865 2  |   | 0.215361814599013                 |
|            | 0.47725666818707    |   |                                   |
| HNRNPA1L2  | 1.61887872192989 2  |   | 0.445107540946025                 |
|            | 0.706564327196561   |   |                                   |
| SUGT1      | 0.0124483701628197  | 2 | 0.993795145033024                 |
|            | 0.0163927235003257  |   |                                   |
| TDRD3      | 4.61190957665882 2  |   | 0.0996635975716271                |
|            | 0.393994945379329   |   |                                   |
| PCDH9      | 3.84694174950023 2  |   | 0.146098989791444                 |
|            | 1.58919378161596    |   |                                   |
| MZT1       | 0.864739701765478   | 2 | 0.648969310421194                 |
|            | 0.141436557688788   |   |                                   |
| BORA       | 0.190322989425768   | 2 | 0.909226087405106                 |
|            | 0.246844103389675   |   |                                   |
| DIS3       | 3.59858879004042 2  |   | 0.165415565099321                 |
|            | 0.440294653938631   |   |                                   |
| PIBF1      | 0.00735273828121201 | 2 | 0.996330380430585                 |
|            | 0.0317633161205115  |   |                                   |
| KLF5       | 2.13196852108568 2  |   | 0.344388719667783                 |
|            | 4.92883330743908    |   |                                   |
| KLF12      | 1.27993909162518 2  |   | 0.527308482549872                 |
|            | 0.252583382662632   |   |                                   |
| TBC1D4     | 2.60430508796531 2  |   | 0.271945787290673                 |
|            | 0.608270580526731   |   |                                   |
| COMMD6     | 23.4658588419557 2  |   | 8.0251562319944e-06               |
|            | 0.244674459310381   |   |                                   |
| UCHL3      | 0.460213431201211   | 2 | 0.794448817896742                 |
|            | 0.121697371550982   |   |                                   |
| LM07       | 3.95390545695219 2  |   | 0.138490613463783                 |
|            | 1.02141589060951    |   |                                   |
| CLN5       | 3.63988334186666 2  |   | 0.162035202020343                 |
|            | 0.494378529990299   |   |                                   |



|            |                      |   |                      |
|------------|----------------------|---|----------------------|
| FBXL3      | 0.0454103033800288   | 2 | 0.977550670448619    |
|            | 0.0520402511516205   |   |                      |
| MYCBP2     | 3.45906443351894     | 2 | 0.177367360045484    |
|            | 0.213089733608195    |   |                      |
| SLAIN1     | 3.01780574170853     | 2 | 0.221152477737243    |
|            | 1.2109106094605      |   |                      |
| POU4F1     | 7.35206138452601     | 2 | 0.0253232915466292   |
|            | 1.89891331246074     |   |                      |
| RNF219     | 3.80590096134669     | 2 | 0.149127970285033    |
|            | 0.433501082001423    |   |                      |
| RBM26      | 0.537256831750612    | 2 | 0.764427251911973    |
|            | 0.136140609483114    |   |                      |
| RBM26-AS1  | 0.71363158492622     | 2 | 0.699901412976017    |
|            | 0.509374389257189    |   |                      |
| NDFIP2     | 5.21013107789955     | 2 | 0.0738982938222756   |
|            | 0.476281515381411    |   |                      |
| TGDS       | 1.18141990170801     | 2 | 0.553933879271107    |
|            | 0.198657583010919    |   |                      |
| GPR180     | 3.80158309850268     | 2 | 0.14945027513783     |
|            | 1.06608974221424     |   |                      |
| DNAJC3-DT  | 3.22228245756613     | 2 | 0.199659626694209    |
|            | 1.29009303885425     |   |                      |
| DNAJC3     | 0.423860745871322    | 2 | 0.809021025364492    |
|            | 0.170989584644854    |   |                      |
| UGGT2      | 1.61166639580188e-05 | 2 | 0.999991941700489    |
|            | 0.00251896830653761  |   |                      |
| MBNL2      | 3.27094391740814     | 2 | 0.194860383539588    |
|            | 0.447192720479091    |   |                      |
| RAP2A      | 9.84646326215687     | 2 | 0.00727558082169033  |
|            | 1.19787438470044     |   |                      |
| IP05       | 5.17425760871789     | 2 | 0.0752357468173399   |
|            | 0.491343871934518    |   |                      |
| STK24      | 0.150340200123684    | 2 | 0.927585690525073    |
|            | 0.102177407857374    |   |                      |
| DOCK9      | 2.30922166801364     | 2 | 0.315180170443525    |
|            | 1.13289463114085     |   |                      |
| UBAC2-AS1  | 4.9342953861404      | 2 | 0.0848264653850299   |
|            | 1.20203318892264     |   |                      |
| UBAC2      | 1.58246315315216     | 2 | 0.453286194713604    |
|            | 0.180324385460741    |   |                      |
| GPR18      | 24.5402170701592     | 2 | 4.68985667778643e-06 |
|            | 0.765273492286244    |   |                      |
| GPR183     | 22.789618018348      | 2 | 1.12537516019362e-05 |
|            | 0.812184498783396    |   |                      |
| TM9SF2     | 14.4400010058533     | 2 | 0.00073180205083756  |
|            | 0.574647792001106    |   |                      |
| CLYBL      | 1.56760969183097     | 2 | 0.456665160999232    |
|            | 0.954980197351669    |   |                      |
| AL355338.1 | 0.741636607354269    | 2 | 0.690169331396677    |
|            | 0.736512091197744    |   |                      |
| PCCA       | 2.4710639336956      | 2 | 0.290680089060268    |

|                             |   |                                    |
|-----------------------------|---|------------------------------------|
| 3.09080888980095            |   |                                    |
| GGACT 0.0464371885329656    | 2 | 0.977048883144262                  |
| 0.20142700839785            |   |                                    |
| TMTC4 0.411903343838231     | 2 | 0.813872408224069                  |
| 0.338275635022203           |   |                                    |
| TPP2 4.11490103125286 2     |   | 0.127779326368809                  |
| 0.47819695900798            |   |                                    |
| TEX30 2.22112351655169 2    |   | 0.329373880591541                  |
| 0.290226419308532           |   |                                    |
| BIVM 1.53089254900111 2     |   | 0.465126310637954                  |
| 0.726064678843272           |   |                                    |
| EFNB2 0.621860730485813     | 2 | 0.732764899998603                  |
| 0.44796112492974            |   |                                    |
| ARGLU1 8.58570085282139 2   |   | 0.0136659160392628                 |
| 0.218844931637439           |   |                                    |
| LIG4 0.0208610205092798     | 2 | 0.989623698877432                  |
| 0.0872754818270344          |   |                                    |
| ABHD13 0.649853816305439    | 2 | 0.722580166431129                  |
| 0.250318122141936           |   |                                    |
| IRS2 0.319724545376421      | 2 | 0.852261160521973                  |
| 0.330058786560785           |   |                                    |
| NAXD 2.85453685465832 2     |   | 0.239963505569592                  |
| 0.470765113149196           |   |                                    |
| CARS2 1.6795520393491 2     |   | 0.431807228922278                  |
| 0.220142923299563           |   |                                    |
| ING1 1.09078538600397 2     |   | 0.57961412823148 0.400095951604051 |
| ANKRD10 0.222747695571482   | 2 | 0.894604240590867                  |
| 0.0908760682223831          |   |                                    |
| ARHGEF7 0.359229155755473   | 2 | 0.835592205076572                  |
| 0.124330915924368           |   |                                    |
| TUBGCP3 2.50204811173188 2  |   | 0.286211550118495                  |
| 0.566830790556203           |   |                                    |
| PCID2 1.17628335773259 2    |   | 0.555358360581014                  |
| 0.205006865177567           |   |                                    |
| CUL4A 1.71678346421387 2    |   | 0.423843187861585                  |
| 0.302008579609354           |   |                                    |
| LAMP1 1.02472862065136 2    |   | 0.599077497966932                  |
| 0.0822882252506654          |   |                                    |
| DCUN1D2 0.216534778023765   | 2 | 0.897387612760315                  |
| 0.498713941994331           |   |                                    |
| TMC03 0.0476241595348825    | 2 | 0.976469190834894                  |
| 0.0560861162552361          |   |                                    |
| TFDP1 3.39676552827423 2    |   | 0.182979205428208                  |
| 0.268332777692915           |   |                                    |
| TMEM255B 0.495706767627051  | 2 | 0.780474365064833                  |
| 0.716274468794924           |   |                                    |
| GAS6-AS1 2.58904707678168 2 |   | 0.274028397243122                  |
| 1.17090280709752            |   |                                    |
| RASA3 0.315287881239377     | 2 | 0.854153857323957                  |
| 0.35212880920752            |   |                                    |

|            |                      |   |                      |
|------------|----------------------|---|----------------------|
| CDC16      | 0.684830769458198    | 2 | 0.710053198187442    |
|            | 0.168341930156344    |   |                      |
| UPF3A      | 0.000399563331647054 | 2 | 0.999800238289205    |
|            | 0.00209333637279781  |   |                      |
| CHAMP1     | 1.75718948351643     | 2 | 0.415366198525108    |
|            | 0.294041349022394    |   |                      |
| OR11G2     | 0.647987340551093    | 2 | 0.723254820369076    |
|            | 0.879131067827023    |   |                      |
| TTC5       | 0.249588510397869    | 2 | 0.882678490413994    |
|            | 0.151416481076413    |   |                      |
| CCNB1IP1   | 1.14663871463647     | 2 | 0.563651369768879    |
|            | 0.141691260780306    |   |                      |
| AL355075.4 | 0.673820116339524    | 2 | 0.713973053058085    |
|            | 0.809534589346912    |   |                      |
| PARP2      | 2.43807692757729     | 2 | 0.295514177941752    |
|            | 0.585305388319992    |   |                      |
| TEP1       | 0.574454896491955    | 2 | 0.750341045672288    |
|            | 0.448801029520623    |   |                      |
| OSGEP      | 1.12796122342291     | 2 | 0.568939821841618    |
|            | 0.140087594406187    |   |                      |
| APEX1      | 6.95505336808913     | 2 | 0.0308837018006998   |
|            | 0.229086066136584    |   |                      |
| PIP4P1     | 1.93426602814122     | 2 | 0.380171423286706    |
|            | 0.295317546333568    |   |                      |
| PNP        | 0.351571687458383    | 2 | 0.838797597869121    |
|            | 0.223299865315759    |   |                      |
| RNASE6     | 5.46151667349362     | 2 | 0.065169850232411    |
|            | 1.72997899704395     |   |                      |
| METTL17    | 0.713331259738111    | 2 | 0.700006519879137    |
|            | 0.20191907212404     |   |                      |
| ZNF219     | 0.226119007342952    | 2 | 0.89309751595371     |
|            | 0.473456039304664    |   |                      |
| HNRNPC     | 3.81078374224107     | 2 | 0.148764334751747    |
|            | 0.114997552795288    |   |                      |
| SUPT16H    | 3.20007309856029     | 2 | 0.201889138957109    |
|            | 0.268949464000468    |   |                      |
| CHD8       | 2.40902385435114     | 2 | 0.299838306735293    |
|            | 0.325969135486439    |   |                      |
| RAB2B      | 5.21764469385414     | 2 | 0.073621192955816    |
|            | 1.18287323999602     |   |                      |
| TOX4       | 1.9454386599308      | 2 | 0.378053586582073    |
|            | 0.17428743541811     |   |                      |
| METTL3     | 1.44485385371217     | 2 | 0.485572376157834    |
|            | 0.29198158055302     |   |                      |
| TRAC       | 1.66651249486106     | 2 | 0.434631711193614    |
|            | 0.19678439169097     |   |                      |
| DAD1       | 53.8792433390126     | 2 | 1.99651406518342e-12 |
|            | 0.340195649046361    |   |                      |
| ABHD4      | 2.83133950485818     | 2 | 0.242762967901252    |
|            | 1.54916127023978     |   |                      |

|           |                    |   |                    |
|-----------|--------------------|---|--------------------|
| OXA1L     | 2.1683625491698    | 2 | 0.338178547955239  |
|           | 0.137128260691267  |   |                    |
| SLC7A7    | 0.0590748793901377 | 2 | 0.970894526965686  |
|           | 0.141402589217646  |   |                    |
| MRPL52    | 4.32444704589318   | 2 | 0.115068977860765  |
|           | 0.131927308518532  |   |                    |
| LRP10     | 3.0519172472591    | 2 | 0.217412540138333  |
|           | 0.249012497089309  |   |                    |
| RBM23     | 0.531644618158317  | 2 | 0.766575328875869  |
|           | 0.102688700364697  |   |                    |
| PRMT5     | 2.72844110677092   | 2 | 0.255579809188163  |
|           | 0.392688168244689  |   |                    |
| HAUS4     | 7.96380737087829   | 2 | 0.0186501015952782 |
|           | 1.1181486571819    |   |                    |
| C14orf93  | 1.9623286052104    | 2 | 0.374874377448515  |
|           | 0.541628593035748  |   |                    |
| PSMB5     | 0.42033896165905   | 2 | 0.810446879120633  |
|           | 0.0985954917574127 |   |                    |
| ACIN1     | 0.376166644890303  | 2 | 0.828545667905488  |
|           | 0.0950183099790005 |   |                    |
| C14orf119 | 2.26987828830738   | 2 | 0.321441682344803  |
|           | 0.216741333318549  |   |                    |
| HOMEZ     | 0.361317458638523  | 2 | 0.834720175615752  |
|           | 0.407759722602749  |   |                    |
| PPP1R3E   | 1.1041883449734    | 2 | 0.57574284220226   |
| BCL2L2    | 4.91811918001321   | 2 | 0.471734113429636  |
|           | 2.93932295297926   |   | 0.0855153326389357 |
| PABPN1    | 0.459773515794081  | 2 | 0.794623582254005  |
|           | 0.082686698047856  |   |                    |
| NGDN      | 2.47701442917713   | 2 | 0.289816529071485  |
|           | 0.260136817444162  |   |                    |
| THTPA     | 0.842285702839741  | 2 | 0.656296341848198  |
|           | 0.371313702567891  |   |                    |
| AP1G2     | 0.0411671093202054 | 2 | 0.979626840667149  |
|           | 0.0321254903106188 |   |                    |
| DHRS4-AS1 | 0.0939372825352016 | 2 | 0.954117317030873  |
|           | 0.0961486538925516 |   |                    |
| DHRS4     | 0.0234912801899518 | 2 | 0.988323070655288  |
|           | 0.0686753100382384 |   |                    |
| DHRS4L2   | 1.56076998468341   | 2 | 0.458229562469385  |
|           | 0.149676884695063  |   |                    |
| NRL       | 1.47344672840926   | 2 | 0.478679808083915  |
|           | 0.694780287985274  |   |                    |
| PCK2      | 6.92828259777296   | 2 | 0.0312998711240662 |
|           | 1.1106108877646    |   |                    |
| DCAF11    | 7.20647059195832   | 2 | 0.0272354649644465 |
|           | 0.481356081763733  |   |                    |
| PSME1     | 8.23963207547234   | 2 | 0.0162475030944926 |
|           | 0.12530288368408   |   |                    |
| EMC9      | 0.008702565218433  | 2 | 0.995658170504929  |

0.0302275099942669  
 AL136295.2 0.401986264318588 2 0.81791804886544  
 0.348608094646939  
 PSME2 3.80802881246884 2 0.148969393597429  
 0.194541258119372  
 AL136295.5 0.556246017837751 2 0.757203672980221  
 0.485903625005857  
 IRF9 0.0424834593358384 2 0.978982286901494  
 0.0734347893322922  
 REC8 0.112098587955404 2 0.945492527654077  
 0.112411309823527  
 IP04 3.05173013667415 2 0.217432881183605  
 0.52316384382922  
 TM9SF1 2.97619360781965 2 0.225801992322744  
 0.786385972162673  
 CHMP4A 0.350604969136633 2 0.839203136374651  
 0.0607257925925224  
 MDP1 2.91116155943399 2 0.233264849059803  
 0.824142697822417  
 NEDD8 7.36212447780041 2 0.0251961962353315  
 0.181343843610779  
 GMPR2 2.2873206008521 2 0.318650527938414  
 0.182816786814927  
 TINF2 0.358317570022293 2 0.835973148852157  
 0.0893732143709187  
 RABGGTA 3.9954862356354 2 0.135641063951718  
 0.746462857149037  
 DHRS1 0.969819517439549 2 0.615752760574589  
 0.217548057124513  
 NOP9 0.916963557294327 2 0.632242801738729  
 0.5139979752849  
 LTB4R 0.0067326793524006 2 0.996639320092525  
 0.0500775205860171  
 RIPK3 2.39111713879759 2 0.302534920229435  
 0.767464146266419  
 NFATC4 1.68094405630695 2 0.431506791995139  
 1.09693553935065  
 CBLN3 1.46555985288854 2 0.480571178914799  
 1.40047276698013  
 KHNYN 3.02006944860881 2 0.22090230714724 0.720260892850495  
 SDR39U1 7.44337983402478 2 0.0241930490355857  
 0.475105911030032  
 STXBP6 4.06713190230101 2 0.130868019135818  
 0.309843179817122  
 G2E3 3.51883849100413 2 0.172144808670463  
 0.461580449936041  
 SCFD1 0.367297089087432 2 0.83222824359097  
 0.0833193428079075  
 COCH 1.54285608677689 2 0.462352337448718  
 0.406541458899347

|            |                     |   |                     |
|------------|---------------------|---|---------------------|
| STRN3      | 0.214660392725912   | 2 | 0.898229032058635   |
|            | 0.148001216889722   |   |                     |
| AP4S1      | 1.37441690695415    | 2 | 0.502978198141376   |
|            | 0.292411539349169   |   |                     |
| HECTD1     | 1.27970520290699    | 2 | 0.527370151908283   |
|            | 0.234716161161979   |   |                     |
| HEATR5A    | 1.67652100048996    | 2 | 0.432462137305378   |
|            | 1.04084250793273    |   |                     |
| AL139353.1 | 0.153514725376619   | 2 | 0.926114536288595   |
|            | 0.3629880046749     |   |                     |
| DTD2       | 2.46495537512335    | 2 | 0.291569264438912   |
|            | 0.719947445071195   |   |                     |
| NUBPL      | 4.0027860931799     | 2 | 0.135146886135237   |
|            | 0.56423926354216    |   |                     |
| ARHGAP5    | 0.634406108626936   | 2 | 0.728182879438148   |
|            | 0.276814375096166   |   |                     |
| SPTSSA     | 0.0696049583116785  | 2 | 0.965796162292051   |
|            | 0.0424743687100046  |   |                     |
| EAPP       | 1.48181079079966    | 2 | 0.4766821342726     |
|            | 0.142886220879501   |   |                     |
| SNX6       | 1.03252442070756    | 2 | 0.596746898942628   |
|            | 0.141982560252592   |   |                     |
| CFL2       | 0.00109825515543667 | 2 | 0.999451023165236   |
|            | 0.0108228592057043  |   |                     |
| BAZ1A      | 12.7146199032714    | 2 | 0.00173402505472631 |
|            | 0.335230998526948   |   |                     |
| AL121603.2 | 0.00875001531704808 | 2 | 0.995634548745955   |
|            | 0.0388661773345134  |   |                     |
| SRP54      | 1.42949854202093    | 2 | 0.489314781818032   |
|            | 0.165408977845678   |   |                     |
| FAM177A1   | 6.76416949772164    | 2 | 0.0339765482788851  |
|            | 0.261380013607638   |   |                     |
| PPP2R3C    | 0.00347626019547527 | 2 | 0.998263379575584   |
|            | 0.00948433843935215 |   |                     |
| KIAA0391   | 0.45081561821038    | 2 | 0.798190642965624   |
|            | 0.632644746826916   |   |                     |
| PSMA6      | 0.642726607333399   | 2 | 0.725159749931496   |
|            | 0.247056827987695   |   |                     |
| NFKBIA     | 1.07286723332568    | 2 | 0.5848302664544     |
|            | 0.202401068342103   |   |                     |
| RALGAPA1   | 0.21377807047058    | 2 | 0.898625383212253   |
|            | 0.17881648457012    |   |                     |
| BRMS1L     | 0.399516241863884   | 2 | 0.818928810861577   |
|            | 0.247227508478309   |   |                     |
| MBIP       | 0.750903356691885   | 2 | 0.686978915203876   |
|            | 0.231065490476986   |   |                     |
| SEC23A     | 0.0453131132725588  | 2 | 0.97759817573023    |
|            | 0.0602175711932229  |   |                     |
| GEMIN2     | 1.41470205600573    | 2 | 0.492948275643322   |
|            | 0.187846043641831   |   |                     |
| TRAPPC6B   | 2.27597792301237    | 2 | 0.320462837332143   |
|            | 0.36909291527816    |   |                     |

|            |                     |   |                      |
|------------|---------------------|---|----------------------|
| PNN        | 7.8413529191385     | 2 | 0.0198276775845608   |
|            | 0.284192333035617   |   |                      |
| MIA2       | 0.0445971382326624  | 2 | 0.97794820632622     |
|            | 0.0744768040141668  |   |                      |
| AL132639.2 | 0.733965234136098   | 2 | 0.692821688211979    |
|            | 0.653984068476996   |   |                      |
| FBX033     | 2.30320590244606    | 2 | 0.316129622656641    |
|            | 0.649026040914147   |   |                      |
| C14orf28   | 3.07280778503097    | 2 | 0.215153426760506    |
|            | 1.1477173765932     |   |                      |
| KLHL28     | 0.0790794819989509  | 2 | 0.96123175292094     |
|            | 0.050360092946995   |   |                      |
| TOGARAM1   | 0.626103553400054   | 2 | 0.731212051841674    |
|            | 0.0931436568471013  |   |                      |
| PRPF39     | 0.141066631685088   | 2 | 0.931896692085157    |
|            | 0.151429609414795   |   |                      |
| FKBP3      | 2.7505950700178     | 2 | 0.252764378363825    |
|            | 0.16471699498754    |   |                      |
| FANCM      | 1.50794544756665    | 2 | 0.470493693541839    |
|            | 0.55098921951124    |   |                      |
| MIS18BP1   | 1.45987785673441    | 2 | 0.481938421957803    |
|            | 0.161964397900648   |   |                      |
| RPS29      | 7.28123204972341    | 2 | 0.0262361768493112   |
|            | 0.0930451678691387  |   |                      |
| LRR1       | 0.66677311507414    | 2 | 0.716493174780214    |
|            | 0.237478220878335   |   |                      |
| RPL36AL    | 28.9203290521352    | 2 | 5.24844123495072e-07 |
|            | 0.159168483734287   |   |                      |
| MGAT2      | 6.11717968120498    | 2 | 0.0469538609852039   |
|            | 0.27623790685894    |   |                      |
| DNAAF2     | 3.19086039586704    | 2 | 0.202821256446364    |
|            | 0.200908941643608   |   |                      |
| POLE2      | 0.00767640414679344 | 2 | 0.996169154409283    |
|            | 0.0890883274271996  |   |                      |
| KLHDC2     | 0.0546158506492443  | 2 | 0.973061565089415    |
|            | 0.0351152654727958  |   |                      |
| NEMF       | 3.62342049898772    | 2 | 0.16337448660204     |
| AL627171.1 | 1.00729850492775    | 2 | 0.299644794567817    |
|            | 0.462639837383716   |   | 0.604321309897721    |
| ARF6       | 2.7066042096094     | 2 | 0.258385633945671    |
|            | 0.135461599527195   |   |                      |
| LINC01588  | 1.2864366312561     | 2 | 0.525598158397371    |
|            | 0.902214104414095   |   |                      |
| VCPKMT     | 0.294783621767432   | 2 | 0.862955795696087    |
|            | 0.0484650269206955  |   |                      |
| SOS2       | 3.69583139444017    | 2 | 0.157565237958031    |
|            | 1.09050186361495    |   |                      |
| L2HGDH     | 1.47341750340412    | 2 | 0.478686802844945    |
|            | 0.904345311289994   |   |                      |
| ATP5S      | 1.13623300847153    | 2 | 0.566591607214646    |

|                               |   |                      |
|-------------------------------|---|----------------------|
| 0.140023940709754             |   |                      |
| CDKL1 2.52572723551193 2      |   | 0.282842911708576    |
| 1.94204153139403              |   |                      |
| MAP4K5 10.2541795206264 2     |   | 0.00593380416224465  |
| 1.39607619018054              |   |                      |
| ATL1 0.442750360798591        | 2 | 0.801415948323859    |
| 0.626514071431289             |   |                      |
| SAV1 2.70606335375056 2       |   | 0.258455518086537    |
| 0.430970594236582             |   |                      |
| NIN 11.9192131603635 2        |   | 0.00258092716021074  |
| 0.692191173807429             |   |                      |
| TMX1 9.13292449048013 2       |   | 0.0103946685340165   |
| 0.436867327849703             |   |                      |
| GNG2 21.0781703646515 2       |   | 2.64809438850211e-05 |
| 0.49295614029679              |   |                      |
| RTRAF 11.6290793149457 2      |   | 0.00298385360606779  |
| 0.240898715113339             |   |                      |
| TXNDC16 0.00212116982371995   | 2 | 0.998939977309539    |
| 0.0252900400702581            |   |                      |
| ER01A 0.0139241980660662      | 2 | 0.993062080233085    |
| 0.0675374010937958            |   |                      |
| AL133453.1 0.0778839667722154 | 2 | 0.961806508284543    |
| 0.264326402743654             |   |                      |
| PSMC6 2.31047506792649 2      |   | 0.314982708925467    |
| 0.0959818269704789            |   |                      |
| STYX 1.82740449912206 2       |   | 0.401036734130365    |
| 0.422118461362426             |   |                      |
| GNPNAT1 3.58742356125459 2    |   | 0.166341598853509    |
| 0.702011085809447             |   |                      |
| DDHD1 0.57941052280336 2      |   | 0.748484142237983    |
| 0.1461022721552               |   |                      |
| CDKN3 2.30645825231114 2      |   | 0.315615958356045    |
| 0.451116075146706             |   |                      |
| CNIH1 5.67228248642473 2      |   | 0.0586515519388451   |
| 0.236827693112986             |   |                      |
| GMFB 0.336639977884855        | 2 | 0.84508337407963     |
| 0.0661518521185683            |   |                      |
| CGRRF1 1.44228657931728 2     |   | 0.486196075137888    |
| 0.348574811296056             |   |                      |
| SAMD4A 1.38751997891638 2     |   | 0.499693689415389    |
| 0.761144815635861             |   |                      |
| GCH1 23.0904771035899 2       |   | 9.68203402895718e-06 |
| 0.919944738971902             |   |                      |
| WDHD1 0.801867399002359       | 2 | 0.669694460642858    |
| 0.505590980079556             |   |                      |
| SOCS4 5.12661219549604 2      |   | 0.0770495854311242   |
| 0.753200856134635             |   |                      |
| MAPK1IP1L 13.1886562010122 2  |   | 0.00136810583158253  |
| 0.492690303839613             |   |                      |
| LGALS3 41.0349875865326 2     |   | 1.22847310102259e-09 |



|                              |   |                                    |
|------------------------------|---|------------------------------------|
| 2.67803186849264             |   |                                    |
| FBX034 3.54983505117038 2    |   | 0.169497428124219                  |
| 0.479007432063728            |   |                                    |
| ATG14 0.143813930108823      | 2 | 0.930617471729697                  |
| 0.228414605793159            |   |                                    |
| KTN1 1.21156784644446 2      |   | 0.545646513962857                  |
| 0.0858190557333478           |   |                                    |
| TMEM260 0.418985757384904    | 2 | 0.810995414760297                  |
| 0.276922988670981            |   |                                    |
| EXOC5 3.90701966246657 2     |   | 0.141775588913131                  |
| 0.662601214481153            |   |                                    |
| AP5M1 0.0586973610418782     | 2 | 0.97107780951235                   |
| 0.0467576934841647           |   |                                    |
| NAA30 2.86881640998978 2     |   | 0.238256321202517                  |
| 0.66058474730731             |   |                                    |
| ACTR10 5.04108941111367 2    |   | 0.0804157918888174                 |
| 0.239877351456577            |   |                                    |
| PSMA3 3.38069863376233 2     |   | 0.18445507946479 0.100310973253914 |
| PSMA3-AS1 2.74955922728494 2 |   | 0.252895324342985                  |
| 0.239295627148635            |   |                                    |
| ARID4A 2.60142408094776 2    |   | 0.272337808437591                  |
| 0.301570015697588            |   |                                    |
| TIMM9 4.62114103691976 2     |   | 0.0992046373345461                 |
| 0.427539243256545            |   |                                    |
| KIAA0586 2.75295898166596 2  |   | 0.252465798523548                  |
| 0.699583856094958            |   |                                    |
| DAAM1 5.65661346169691 2     |   | 0.0591128629615403                 |
| 0.124684128373328            |   |                                    |
| JKAMP 0.0363293799289835     | 2 | 0.981999293611496                  |
| 0.0444188386584902           |   |                                    |
| PCNX4 21.0788232345714 2     |   | 2.64723009899548e-05               |
| 0.680713967145936            |   |                                    |
| DHRS7 3.58733645740772 2     |   | 0.166348843507844                  |
| 0.441838324744874            |   |                                    |
| PPM1A 0.750172721433723      | 2 | 0.687229926559052                  |
| 0.184358797701535            |   |                                    |
| MNAT1 0.0592311253684213     | 2 | 0.970818680745803                  |
| 0.0515912847205361           |   |                                    |
| TRMT5 3.77118773708 2        |   | 0.151738919695803                  |
| 0.818487100536428            |   |                                    |
| SLC38A6 1.0562519773912 2    |   | 0.589709056257602                  |
| 0.894665379198565            |   |                                    |
| PRKCH 1.63763502266315 2     |   | 0.440952767991342                  |
| 0.791387457135433            |   |                                    |
| HIF1A 4.46940252403289 2     |   | 0.107024097240942                  |
| 0.319631214966824            |   |                                    |
| SNAPC1 0.655399866520237     | 2 | 0.72057920912216                   |
| 0.180224095919349            |   |                                    |
| PPP2R5E 0.141406904463964    | 2 | 0.931738156033394                  |
| 0.0242365646858945           |   |                                    |

|            |                      |   |                      |
|------------|----------------------|---|----------------------|
| WDR89      | 2.08982062320636     | 2 | 0.351723363468071    |
|            | 0.6615304579728      |   |                      |
| SGPP1      | 0.500113059896657    | 2 | 0.778756758747738    |
|            | 0.244685156957945    |   |                      |
| SYNE2      | 12.2095925293776     | 2 | 0.00223213608868478  |
|            | 0.289058628348155    |   |                      |
| ESR2       | 5.21013966477431     | 2 | 0.0738979765452595   |
|            | 0.565526925487424    |   |                      |
| MTHFD1     | 1.2117761552871      | 2 | 0.545589685425474    |
|            | 0.362908982165964    |   |                      |
| ZBTB25     | 0.000904683479838152 | 2 | 0.999547760551182    |
|            | 0.00738158274916908  |   |                      |
| AKAP5      | 0.00260754390376475  | 2 | 0.998697077589526    |
|            | 0.0370503023489641   |   |                      |
| ZBTB1      | 3.66314587898349     | 2 | 0.160161445278106    |
|            | 0.439771602667864    |   |                      |
| HSPA2      | 1.40435562724196     | 2 | 0.495505010318728    |
|            | 1.08027772574733     |   |                      |
| CHURC1     | 2.84927625493521     | 2 | 0.240595512364385    |
|            | 0.174530261591262    |   |                      |
| MAX        | 0.0711399993843061   | 2 | 0.965055178300189    |
|            | 0.0429202684934878   |   |                      |
| FUT8       | 3.56065875246042     | 2 | 0.168582611018041    |
|            | 0.365707851960139    |   |                      |
| GPHN       | 3.98154703162168     | 2 | 0.136589730256392    |
|            | 1.24468288608096     |   |                      |
| FAM71D     | 1.18784158968841     | 2 | 0.55215813634622     |
|            | 0.734009465157084    |   |                      |
| MPP5       | 1.26420674482885     | 2 | 0.531472739418726    |
|            | 0.735747612431407    |   |                      |
| ATP6V1D    | 0.464045033830685    | 2 | 0.792928268806969    |
|            | 0.110775069067287    |   |                      |
| EIF2S1     | 7.00983792637652     | 2 | 0.0300492083375488   |
|            | 0.407584316003782    |   |                      |
| TMEM229B   | 2.03734477128241     | 2 | 0.361073989119128    |
|            | 1.17641862227445     |   |                      |
| PIGH       | 0.108606197663404    | 2 | 0.947144984452578    |
|            | 0.0995151145304723   |   |                      |
| VTI1B      | 0.454401172779804    | 2 | 0.796760946858324    |
|            | 0.117723350331166    |   |                      |
| RDH11      | 2.0702050084284      | 2 | 0.355189970590049    |
|            | 0.267935011696898    |   |                      |
| ZFYVE26    | 0.212949747922027    | 2 | 0.898997636127111    |
|            | 0.344164377279731    |   |                      |
| RAD51B     | 1.78634572605748     | 2 | 0.409354863160488    |
|            | 0.426341505266885    |   |                      |
| AL121820.2 | 0.639074668870863    | 2 | 0.7264850789594      |
|            | 0.730974956322423    |   |                      |
| AL121820.1 | 0.94486557427393     | 2 | 0.623483618828282    |
|            | 0.88729239348042     |   |                      |
| ZFP36L1    | 39.4275419550242     | 2 | 2.74421441126549e-09 |

|                    |                    |   |                    |
|--------------------|--------------------|---|--------------------|
| 0.537080253011952  |                    |   |                    |
| ACTN1              | 2.7883367745411    | 2 | 0.248039223196963  |
| 1.58421846912056   |                    |   |                    |
| DCAF5              | 0.154345341975657  | 2 | 0.925729993092886  |
| 0.104817029553386  |                    |   |                    |
| EXD2               | 1.10005904267693   | 2 | 0.576932778301264  |
| 1.04110410319283   |                    |   |                    |
| ERH                | 20.2082137982963   | 2 | 4.091119159777e-05 |
| 0.18426605087685   |                    |   |                    |
| SLC39A9            | 0.206941157486168  | 2 | 0.901702551574029  |
| 0.193038644076505  |                    |   |                    |
| SUSD6              | 3.2191919974863    | 2 | 0.199968385237187  |
| 0.621732893913923  |                    |   |                    |
| SRSF5              | 2.67379926152926   | 2 | 0.26265874660536   |
| COX16              | 3.73103579150374   | 2 | 0.0634060905530394 |
| 0.493074170846393  |                    |   | 0.154816010565063  |
| SYNJ2BP            | 4.99874964174301   | 2 | 0.082136332496562  |
| 0.608209785422996  |                    |   |                    |
| MED6               | 0.364304331887346  | 2 | 0.833474504331435  |
| 0.0939082506591337 |                    |   |                    |
| TTC9               | 0.438487461299023  | 2 | 0.80312594788807   |
| 0.125483087336676  |                    |   |                    |
| MAP3K9             | 2.9694650795318    | 2 | 0.226562929147672  |
| 1.27504556466864   |                    |   |                    |
| AC004816.1         | 2.42210515209071   | 2 | 0.297883569247645  |
| 0.763126106783452  |                    |   |                    |
| PCNX1              | 1.30752700120424   | 2 | 0.520084749643865  |
| 0.632143361227907  |                    |   |                    |
| SIPA1L1            | 1.05766552995535   | 2 | 0.589292411138101  |
| 0.189310671707707  |                    |   |                    |
| DCAF4              | 0.399281822801598  | 2 | 0.81902480274901   |
| 0.229293478927877  |                    |   |                    |
| ZFYVE1             | 0.642276381234057  | 2 | 0.725323011229737  |
| 0.448877015756069  |                    |   |                    |
| RBM25              | 1.38741853498147   | 2 | 0.499719035505238  |
| 0.114088903862237  |                    |   |                    |
| PSEN1              | 2.35405651536832   | 2 | 0.308193250004484  |
| 0.537263622844632  |                    |   |                    |
| AC004846.1         | 0.0896373118826227 | 2 | 0.95617086201681   |
| 0.184838226199923  |                    |   |                    |
| NUMB               | 1.15638812307784   | 2 | 0.56091042213986   |
| RIOX1              | 1.34712045227389   | 2 | 0.223228749106926  |
| 0.41104092757718   |                    |   | 0.509890018695098  |
| ACOT2              | 0.947685614713699  | 2 | 0.622605113819431  |
| 0.427271741406615  |                    |   |                    |
| DNAL1              | 2.02522397972883   | 2 | 0.363268884647778  |
| 0.400321904829384  |                    |   |                    |
| PNMA1              | 7.84173183671315   | 2 | 0.0198239214126412 |
| 1.01142333965507   |                    |   |                    |
| ELMSAN1            | 0.550638940389467  | 2 | 0.759329501328144  |

0.177012856348225  
 AC005520.2 1.67025889663999 2 0.433818320745313  
 2.01366827605952  
 PTGR2 0.0138117504502571 2 0.993117915534343  
 0.121454897462709  
 ZNF410 0.49354073908278 2 0.781320087823479  
 0.777829625035595  
 COQ6 1.31357313769287 2 0.518514872071965  
 0.408882316220639  
 ENTPD5 1.47273805914793 2 0.47884945097032 1.03506249484328  
 ALDH6A1 3.24476193164461 2 0.197428069543577  
 0.673603839742855  
 LIN52 4.02278511017392 2 0.133802217914083  
 1.15616089373167  
 ABCD4 1.29552791706744 2 0.52321439882193 0.208001919959373  
 NPC2 3.08792541840699 2 0.213533252462231  
 0.249465483941599  
 ISCA2 0.402254770647878 2 0.817808248149671  
 0.10392905696236  
 FCF1 6.95312083714774 2 0.0309135580775787  
 0.533451003218696  
 YLPM1 0.433663778466493 2 0.805065298074117  
 0.207940322876346  
 DLST 0.0763780139969825 2 0.962530998602558  
 0.0686132641003602  
 EIF2B2 2.39401501547107 2 0.302096883206264  
 0.317195044595901  
 MLH3 0.397276739147742 2 0.819846321105506  
 0.161931541336764  
 ACYP1 4.43079931848485 2 0.1091098987539 0.649001384952291  
 NEK9 4.07561075630079 2 0.130314388090461  
 1.09976922924776  
 TMED10 34.9303924453624 2 2.59993000462089e-08  
 0.504639784370596  
 FOS 6.26180179570736 2 0.0436784297187643  
 0.261421191159387  
 JDP2 0.302342672373018 2 0.859700388253701  
 0.396060709373886  
 BATF 0.006882895237959 2 0.996564467374552  
 0.0245263301834064  
 TTLL5 0.682506608375106 2 0.710878816817279  
 0.46050874376158  
 ERG28 1.38799855071258 2 0.499574134066669  
 0.165850814899091  
 IFT43 0.000919131986552746 2 0.999540539591  
 0.00976926549202538  
 GPATCH2L 1.40608961216174 2 0.49507559738673 0.312341872200334  
 ANGEL1 1.9399016455884 2 0.379101680806373  
 4.47116478445064  
 IRF2BPL 2.33374613758468 2 0.311338956259959

|                            |   |                                    |
|----------------------------|---|------------------------------------|
| 2.96951345832827           |   |                                    |
| CIPC 3.55193700712024 2    |   | 0.169319383637258                  |
| 2.11385012618387           |   |                                    |
| POMT2 1.07088744247464 2   |   | 0.585409473889969                  |
| 0.580284272670093          |   |                                    |
| GSTZ1 0.0191183785942788   | 2 | 0.990486354516695                  |
| 0.0250539299636291         |   |                                    |
| TMED8 5.98222006409345 2   |   | 0.0502316470271851                 |
| 0.370917040333965          |   |                                    |
| SAMD15 1.32435814153201 2  |   | 0.515726305062877                  |
| 0.339821747703729          |   |                                    |
| VIPAS39 0.676250635856839  | 2 | 0.713105917342228                  |
| 0.290475395596362          |   |                                    |
| AHSA1 2.68675351092373 2   |   | 0.260962970954541                  |
| 0.179710339514401          |   |                                    |
| SPTLC2 0.151316925862755   | 2 | 0.927132802711306                  |
| 0.0359763118512813         |   |                                    |
| ALKBH1 1.57093728444175 2  |   | 0.455905994915552                  |
| 0.606599168661437          |   |                                    |
| SLIRP 0.372801382642045    | 2 | 0.829940978201128                  |
| 0.0508369212353085         |   |                                    |
| SNW1 1.26605717986897 2    |   | 0.53098123893627 0.104019475457678 |
| ADCK1 2.93630808708071 2   |   | 0.230350309604396                  |
| 1.36052466337927           |   |                                    |
| CEP128 5.94949735590666 2  |   | 0.0510602649620293                 |
| 2.35030048262373           |   |                                    |
| GTF2A1 0.675614966297911   | 2 | 0.713332603226621                  |
| 0.262155888614377          |   |                                    |
| SEL1L 0.169445887505306    | 2 | 0.918766799223949                  |
| 0.165511688030927          |   |                                    |
| GALC 0.0216448442720994    | 2 | 0.989235929582378                  |
| 0.101557804464226          |   |                                    |
| GPR65 14.7887325944967 2   |   | 0.000614706095888984               |
| 1.33485651273219           |   |                                    |
| ZC3H14 2.89089242535788 2  |   | 0.235640907133204                  |
| 0.428535328810607          |   |                                    |
| TTC8 0.462576855836333     | 2 | 0.79351056242617                   |
| 0.303138633372614          |   |                                    |
| FOXN3 47.6150278852875 2   |   | 4.57643922757711e-11               |
| 1.38966437392199           |   |                                    |
| EFCAB11 2.60758178157436 2 |   | 0.271500610555579                  |
| 0.850724314969017          |   |                                    |
| TDP1 3.31674424129343 2    |   | 0.190448755491554                  |
| 0.712955058687193          |   |                                    |
| PSMC1 0.130350549595504    | 2 | 0.936903233460383                  |
| 0.036914170485235          |   |                                    |
| NRDE2 0.848405828995627    | 2 | 0.654291103287313                  |
| 0.281198507850707          |   |                                    |
| CALM1 6.18664887207872 2   |   | 0.0453509372300914                 |
| 0.143159415652524          |   |                                    |

|          |                    |   |                      |
|----------|--------------------|---|----------------------|
| RPS6KA5  | 4.81487140964034   | 2 | 0.0900459030469283   |
|          | 0.778577886495653  |   |                      |
| DGLUCY   | 1.77606400686855   | 2 | 0.411464717622407    |
|          | 0.514122449869972  |   |                      |
| GPR68    | 1.37094014861605   | 2 | 0.503853325394622    |
|          | 1.15346274288851   |   |                      |
| CCDC88C  | 12.4229558921647   | 2 | 0.00200627011276422  |
|          | 0.312524808286921  |   |                      |
| PPP4R3A  | 0.947510463109012  | 2 | 0.622659641349428    |
|          | 0.154258288603437  |   |                      |
| FBLN5    | 1.31074360611188   | 2 | 0.519248968339534    |
|          | 0.750525959571484  |   |                      |
| TRIP11   | 10.7935770260394   | 2 | 0.00453110919967281  |
|          | 0.673315716188785  |   |                      |
| ATXN3    | 0.395837512282962  | 2 | 0.820436505857638    |
|          | 0.130589425607079  |   |                      |
| NDUFB1   | 33.6917978798763   | 2 | 4.82968768311665e-08 |
|          | 0.448403421723811  |   |                      |
| CPSF2    | 0.0478774300731219 | 2 | 0.976345543225365    |
|          | 0.0568342334590346 |   |                      |
| RIN3     | 0.100519962146374  | 2 | 0.950982154998174    |
|          | 0.260449784281778  |   |                      |
| LGMN     | 4.39629871033838   | 2 | 0.111008405515808    |
|          | 0.71727244371336   |   |                      |
| GOLGA5   | 0.386413140218121  | 2 | 0.824311678397402    |
|          | 0.242334108551859  |   |                      |
| ITPK1    | 1.32708132565838   | 2 | 0.515024574063221    |
|          | 0.879196813837401  |   |                      |
| MOAP1    | 3.77787201811175   | 2 | 0.151232633415661    |
|          | 0.250707211028979  |   |                      |
| TMEM251  | 1.9937624820884    | 2 | 0.369028559453294    |
|          | 0.412719481977568  |   |                      |
| GON7     | 0.0726280195502084 | 2 | 0.964337434554331    |
|          | 0.0539825991353084 |   |                      |
| UBR7     | 1.40896240095554   | 2 | 0.494364984055285    |
|          | 0.428474178269532  |   |                      |
| BTBD7    | 1.53436918517743   | 2 | 0.464318475499531    |
|          | 0.170981622226432  |   |                      |
| ASB2     | 31.1687958906715   | 2 | 1.70522608922141e-07 |
|          | 0.977701947177126  |   |                      |
| DDX24    | 0.957823478170079  | 2 | 0.619457156135467    |
|          | 0.0962554372276105 |   |                      |
| IFI27L1  | 4.69673056835916   | 2 | 0.0955251911905741   |
|          | 0.888640527949276  |   |                      |
| IFI27L2  | 1.81763773498106   | 2 | 0.402999939366609    |
|          | 0.157417447234785  |   |                      |
| SERPINA9 | 56.307069220847    | 2 | 5.93081139754759e-13 |
|          | 1.35128387455637   |   |                      |
| DICER1   | 0.832178011424596  | 2 | 0.659621557784947    |
|          | 0.212100679005038  |   |                      |

|                    |                    |   |                      |
|--------------------|--------------------|---|----------------------|
| DICER1-AS1         | 2.14016791998988   | 2 | 0.342979719634268    |
| 1.72280764733676   |                    |   |                      |
| SYNE3              | 0.885451377089597  | 2 | 0.642283368610624    |
| 0.314645506125837  |                    |   |                      |
| AL133467.1         | 5.54192786234868   | 2 | 0.0626016319846018   |
| 0.662170075070293  |                    |   |                      |
| SNHG10             | 4.43347902208304   | 2 | 0.10896380555323     |
| GLRX5              | 2.22683656303102   | 2 | 0.585379255411669    |
| 0.195663130418162  |                    |   | 0.328434358968619    |
| TCL1B              | 9.94631237004114   | 2 | 0.00692126872066745  |
| 1.25364020445833   |                    |   |                      |
| TCL1A              | 175.917704471741   | 2 | 0.638293374570733    |
| AL139020.1         | 8.4936084859164    | 2 | 0.014309891851948    |
| 0.571097146524379  |                    |   |                      |
| ATG2B              | 0.295685962133177  | 2 | 0.862566543588007    |
| 0.391497270378205  |                    |   |                      |
| GSKIP              | 0.360778815255201  | 2 | 0.834945014141099    |
| 0.0451753525855174 |                    |   |                      |
| AL163051.1         | 2.98878017324143   | 2 | 0.224385418672932    |
| 2.91860863453823   |                    |   |                      |
| PAPOLA             | 0.781400347702992  | 2 | 0.676582982901278    |
| 0.0805088105993968 |                    |   |                      |
| AL137786.1         | 0.180331357141607  | 2 | 0.913779779001373    |
| 0.391635089585439  |                    |   |                      |
| VRK1               | 2.60082733865383   | 2 | 0.272419078305545    |
| 0.263735526041973  |                    |   |                      |
| SETD3              | 0.0368611852728388 | 2 | 0.981738212088169    |
| 0.0635210993127555 |                    |   |                      |
| CCNK               | 0.0512704446745786 | 2 | 0.974690570117167    |
| 0.0592558337306462 |                    |   |                      |
| EVL                | 3.75025581736001   | 2 | 0.153335352667986    |
| 0.171604913846618  |                    |   |                      |
| DEGS2              | 1.72216685310903   | 2 | 0.422703865547832    |
| 1.1637212902657    |                    |   |                      |
| YY1                | 4.73926188163725   | 2 | 0.0935152325654126   |
| 0.222563201821412  |                    |   |                      |
| SLC25A29           | 0.481913479573039  | 2 | 0.785875622800206    |
| 0.686348932440642  |                    |   |                      |
| WARS               | 8.18482373511903   | 2 | 0.0166989093920116   |
| 0.575620736077171  |                    |   |                      |
| WDR25              | 0.79552350205695   | 2 | 0.671822069513459    |
| 0.542682085946252  |                    |   |                      |
| PPP2R5C            | 24.7983975242496   | 2 | 4.1218899920904e-06  |
| 0.524689131889605  |                    |   |                      |
| AL118558.3         | 1.13566059984618   | 2 | 0.566753791383953    |
| 0.669090154162865  |                    |   |                      |
| DYNC1H1            | 8.65909401835643   | 2 | 0.0131735136194371   |
| 0.635971417296013  |                    |   |                      |
| HSP90AA1           | 35.0339780042065   | 2 | 2.46870011100242e-08 |
| 0.380352234622701  |                    |   |                      |

|            |                     |   |                     |
|------------|---------------------|---|---------------------|
| WDR20      | 1.12552158507682    | 2 | 0.569634248996283   |
|            | 0.289403301677191   |   |                     |
| MOK        | 4.68746022212651    | 2 | 0.0959689947472834  |
|            | 1.63018049501408    |   |                     |
| ZNF839     | 0.332117467751717   | 2 | 0.84699648534202    |
|            | 0.285828569094463   |   |                     |
| CINP       | 0.602913423400496   | 2 | 0.739739847741826   |
|            | 0.182854179759322   |   |                     |
| TECPR2     | 0.376481443838524   | 2 | 0.828415265515987   |
|            | 0.563697497385378   |   |                     |
| RCOR1      | 2.3136206326858     | 2 | 0.314487699044423   |
|            | 0.367284077092867   |   |                     |
| TRAF3      | 12.8404857624853    | 2 | 0.00162826071277256 |
|            | 0.492115104535104   |   |                     |
| AMN        | 7.40150827836988    | 2 | 0.0247048885189263  |
|            | 1.11737446085097    |   |                     |
| CDC42BPB   | 0.821896458888783   | 2 | 0.663021255691019   |
|            | 0.296937150982378   |   |                     |
| EIF5       | 0.00936707442968544 | 2 | 0.99532741344297    |
|            | 0.00839455734631632 |   |                     |
| MARK3      | 0.227566917000651   | 2 | 0.892451187678868   |
|            | 0.0949724122014582  |   |                     |
| CKB        | 3.69598085943644    | 2 | 0.157553463154165   |
|            | 1.20650514876687    |   |                     |
| TRMT61A    | 0.193439883822616   | 2 | 0.907810210128012   |
|            | 0.172037181646185   |   |                     |
| BAG5       | 0.211935002005177   | 2 | 0.899453878950218   |
|            | 0.137230750366629   |   |                     |
| KLC1       | 2.13821000903753    | 2 | 0.343315645910626   |
|            | 0.248087042151696   |   |                     |
| APOPT1     | 1.28977723061135    | 2 | 0.524720984738215   |
|            | 0.194747177361785   |   |                     |
| AL049840.1 | 0.861073944265856   | 2 | 0.650159883234044   |
|            | 0.562842246745278   |   |                     |
| XRCC3      | 0.0982144759784803  | 2 | 0.952079025183603   |
|            | 0.221982312764781   |   |                     |
| ZFYVE21    | 0.632389668065778   | 2 | 0.728917418411491   |
|            | 0.191503467984104   |   |                     |
| PPP1R13B   | 0.340333911381134   | 2 | 0.843523973711909   |
|            | 0.4503568941811     |   |                     |
| ATP5MPL    | 29.8575338417863    | 3 | 2.8487542944345e-07 |
|            | 0.325420805941095   |   |                     |
| INF2       | 2.29152255088927    | 2 | 0.317981753924308   |
|            | 0.625815676282559   |   |                     |
| SIVA1      | 3.07056106631863    | 2 | 0.215395257181271   |
|            | 0.123524383914603   |   |                     |
| AKT1       | 2.24516370234883    | 2 | 0.325438475300094   |
|            | 1.11491572769273    |   |                     |
| PLD4       | 43.6617434813898    | 3 | 3.3034885937866e-10 |
|            | 3.1801491386802     |   |                     |



|          |                    |   |                      |
|----------|--------------------|---|----------------------|
| CDCA4    | 0.0839244373613459 | 2 | 0.958906008622225    |
|          | 0.0677901354441554 |   |                      |
| GPR132   | 0.331885948782474  | 2 | 0.847094538893844    |
|          | 0.406781894389316  |   |                      |
| NUDT14   | 0.0493864772166293 | 2 | 0.975609145348539    |
|          | 0.0755773141121613 |   |                      |
| BRF1     | 2.61150679037957   | 2 | 0.270968311902122    |
|          | 1.23439648495697   |   |                      |
| BTBD6    | 0.0269234402638858 | 2 | 0.986628483603038    |
|          | 0.166025683551065  |   |                      |
| PACS2    | 0.67097979113258   | 2 | 0.714987731221377    |
|          | 0.683320073527355  |   |                      |
| MTA1     | 0.0526492069838812 | 2 | 0.974018868362379    |
|          | 0.0512633451440678 |   |                      |
| CRIP1    | 11.9386169621204   | 2 | 0.00255600833616909  |
|          | 0.821078309909561  |   |                      |
| TEDC1    | 0.256842932388844  | 2 | 0.879482628824138    |
|          | 0.140488806155228  |   |                      |
| TMEM121  | 3.07470883055107   | 2 | 0.214949015695542    |
|          | 3.88343891456723   |   |                      |
| IGHA2    | 9.40577894904826   | 2 | 0.0090690344621982   |
|          | 0.903023378199432  |   |                      |
| IGHE     | 0.342329030274961  | 2 | 0.842682927969543    |
|          | 1.27446643298204   |   |                      |
| IGHG4    | 74.3949260670656   | 2 | 1.11022302462516e-16 |
|          | 0.727415713185999  |   |                      |
| IGHG2    | 22.769351245258    | 2 | 1.13683699723977e-05 |
|          | 0.682877196742431  |   |                      |
| IGHGP    | 15.1905491331477   | 2 | 0.000502821879654336 |
|          | 0.943781086499395  |   |                      |
| IGHA1    | 24.023945485566    | 2 | 6.07108790284805e-06 |
|          | 0.727877794814374  |   |                      |
| IGHG1    | 34.7412577661505   | 2 | 2.85779931941121e-08 |
|          | 0.483315078610664  |   |                      |
| IGHG3    | 203.330274283503   | 2 | 0.912276764616527    |
|          | 1.54544847281003   | 2 | 0.46175342781282     |
| IGHD     | 0.0379431203116941 | 2 | 0.237305234185678    |
|          | 0.20274082350988   |   |                      |
| IGHM     | 46.3626958004355   | 2 | 8.55989723547168e-11 |
|          | 0.874935185193054  |   |                      |
| FAM30A   | 1.12614258983299   | 2 | 0.569457403664199    |
|          | 0.194763780864171  |   |                      |
| IGHV1-2  | 5.43288986846342   | 2 | 0.0661093602833959   |
|          | 1.3996650440231    |   |                      |
| IGHV3-7  | 1.36949001765553   | 2 | 0.50421878452287     |
|          | 0.0379431203116941 | 2 | 6.65920718440571     |
| IGHV3-21 | 0.20274082350988   | 2 | 0.981207267227759    |
|          | 0.915943835873158  |   |                      |
| IGHV3-23 | 0.620578926956322  | 2 | 0.632565239695124    |
|          | 0.0020753021574848 |   |                      |
| IGHV3-30 | 0.0500976107408437 | 2 | 0.998962887094977    |
|          | 1.60401560788363   | 2 | 0.448427704730739    |
| IGHV3-33 |                    |   |                      |

|                    |                    |   |                      |
|--------------------|--------------------|---|----------------------|
| 1.15512415345569   |                    |   |                      |
| IGHV1-46           | 0.848708995499038  | 2 | 0.654191931230916    |
| 1.15174656651806   |                    |   |                      |
| IGHV5-51           | 0.0549866439803439 | 2 | 0.972881179441839    |
| 0.218954563478554  |                    |   |                      |
| IGHV1-69           | 4.54395221712869   | 2 | 0.103108225583724    |
| 1.1183335101686    |                    |   |                      |
| IGHV1-69D          | 7.00276474597605   | 2 | 0.0301556682147974   |
| 0.986596981992524  |                    |   |                      |
| NIPA1              | 0.205366547064078  | 2 | 0.902412746224987    |
| 0.243943966610726  |                    |   |                      |
| NIPA2              | 16.0090847652028   | 2 | 0.000333942283904265 |
| 0.347551357066884  |                    |   |                      |
| TUBGCP5            | 2.44471293277644   | 2 | 0.294535286012177    |
| 0.633405803618419  |                    |   |                      |
| NDN                | 0.599491406336234  | 2 | 0.74100663236347     |
| 0.395164671309295  |                    |   |                      |
| SNRPN              | 3.5722460300477    | 2 | 0.167608728149828    |
| 0.213447341727358  |                    |   |                      |
| SNURF              | 6.19900499183763   | 2 | 0.0450716201315984   |
| 1.51426292261757   |                    |   |                      |
| PWAR6              | 2.07622911434629   | 2 | 0.354121729195604    |
| 1.28227195176058   |                    |   |                      |
| UBE3A              | 4.02355216788985   | 2 | 0.133750910741772    |
| 0.296502852891763  |                    |   |                      |
| HERC2              | 0.0381676824877364 | 2 | 0.98109710239305     |
| 0.0358280300025911 |                    |   |                      |
| NSMCE3             | 0.0849655344695676 | 2 | 0.958406981381131    |
| 0.0402799817127645 |                    |   |                      |
| ARHGAP11B          | 1.39660003320318   | 2 | 0.49743020852228     |
| 0.428298390368239  |                    |   |                      |
| AC091057.6         | 0.549247847729722  | 2 | 0.759857833894545    |
| 0.536207652370628  |                    |   |                      |
| FAN1               | 1.55086058094964   | 2 | 0.4605055871938      |
| 1.10456481798584   |                    |   |                      |
| MTMR10             | 2.03845721266266   | 2 | 0.360873208140158    |
| 1.12489294398698   |                    |   |                      |
| LINC02352          | 4.00415632483905   | 2 | 0.135054326574858    |
| 3.23958056848583   |                    |   |                      |
| AC012236.1         | 3.32961281183744   | 2 | 0.189227287719137    |
| 0.393104466274423  |                    |   |                      |
| KLF13              | 1.62765257637384   | 2 | 0.443159163377969    |
| 0.309687130249278  |                    |   |                      |
| LINC02256          | 3.66049961182741   | 2 | 0.160373500522031    |
| 1.72005403849613   |                    |   |                      |
| AC123768.3         | 1.06718892427257   | 2 | 0.586493049284425    |
| 0.812280279065661  |                    |   |                      |
| ARHGAP11A          | 0.266452398837363  | 2 | 0.875267084809273    |
| 0.276271405482112  |                    |   |                      |
| AVEN               | 0.201436056428453  | 2 | 0.904187952435738    |
| 0.271407068772117  |                    |   |                      |

|           |                      |   |                     |                   |
|-----------|----------------------|---|---------------------|-------------------|
| EMC7      | 4.10737666039923     | 2 | 0.12826096132023    | 0.199434076783115 |
| PGBD4     | 2.32601732606378     | 2 | 0.312544424024101   |                   |
|           | 0.892597543491954    |   |                     |                   |
| KATNBL1   | 2.40632088164194     | 2 | 0.30024380806847    | 0.150244328774959 |
| EMC4      | 11.9457808625711     | 2 | 0.00254686921923575 |                   |
|           | 0.340525202947514    |   |                     |                   |
| SLC12A6   | 0.862265036793034    | 2 | 0.649772798219806   |                   |
|           | 0.79843298941739     |   |                     |                   |
| NOP10     | 7.67133786199317     | 2 | 0.0215868934971891  |                   |
|           | 0.224280130820987    |   |                     |                   |
| LPCAT4    | 0.422866645553903    | 2 | 0.809423249348015   |                   |
|           | 0.324343052161338    |   |                     |                   |
| GOLGA8A   | 1.11188872375051     | 2 | 0.573530385143135   |                   |
|           | 1.04763252471637     |   |                     |                   |
| GOLGA8B   | 1.57850666957311     | 2 | 0.454183791946055   |                   |
|           | 0.609846916868778    |   |                     |                   |
| AQR       | 2.61560919221234     | 2 | 0.270413071102333   |                   |
|           | 0.370706353338131    |   |                     |                   |
| ZNF770    | 0.0540641191549578   | 2 | 0.973330036474412   |                   |
|           | 0.0681731050864252   |   |                     |                   |
| DPH6      | 4.90798267399516     | 2 | 0.08594984616302    | 1.78890013632839  |
| C15orf41  | 0.212302904942473    | 2 | 0.899288438305196   |                   |
|           | 0.398617953118956    |   |                     |                   |
| FAM98B    | 0.326326149666055    | 2 | 0.849452652769544   |                   |
|           | 0.193759691886195    |   |                     |                   |
| RASGRP1   | 4.62704453489685     | 2 | 0.098912241897901   |                   |
|           | 0.908935314005131    |   |                     |                   |
| C15orf53  | 1.54855433335056     | 2 | 0.461036913429803   |                   |
|           | 1.27800425420661     |   |                     |                   |
| EIF2AK4   | 4.34200729562239     | 2 | 0.114063080282369   |                   |
|           | 0.594183366779773    |   |                     |                   |
| SRP14     | 0.455599192865944    | 2 | 0.796283821964798   |                   |
|           | 0.0257839968902485   |   |                     |                   |
| SRP14-AS1 | 8.6123091761015      | 2 | 0.0134853065760556  |                   |
|           | 1.20624029407033     |   |                     |                   |
| BMF       | 2.18858211566926     | 2 | 0.334776860271465   |                   |
|           | 0.521550774970215    |   |                     |                   |
| BUB1B     | 0.706925231340918    | 2 | 0.702252245326703   |                   |
|           | 0.448137923355193    |   |                     |                   |
| PLCB2     | 3.53559167531304     | 2 | 0.170708844456476   |                   |
|           | 1.55058330069064     |   |                     |                   |
| KNSTRN    | 8.06965628333404     | 2 | 0.0176887198058721  |                   |
|           | 1.23236864740942     |   |                     |                   |
| IVD       | 0.65594187128142     | 2 | 0.720383956899187   |                   |
|           | 0.21103469370144     |   |                     |                   |
| BAHD1     | 3.13906848768393e-05 | 2 | 0.999984304780733   |                   |
|           | 0.0052025848755594   |   |                     |                   |
| CHST14    | 0.0938217349761253   | 2 | 0.954172441586762   |                   |
|           | 0.2361608909603      |   |                     |                   |
| CCDC32    | 7.51061776719541     | 2 | 0.0233932237100317  |                   |

|                                |   |                      |
|--------------------------------|---|----------------------|
| 0.479860239420844              |   |                      |
| RPUSD2 7.37103442076657 2      |   | 0.025084197560307    |
| 0.940654144423125              |   |                      |
| KNL1 1.35439977086036 2        |   | 0.508037565943434    |
| 0.441531792338466              |   |                      |
| RMDN3 0.113298891321469        | 2 | 0.944925258962968    |
| 0.0951871062919374             |   |                      |
| GCHFR 26.8845798117961 2       |   | 1.45240478055531e-06 |
| 0.460891830109519              |   |                      |
| DNAJC17 1.335988354963 2       |   | 0.512736004448072    |
| 0.34126123768174               |   |                      |
| C15orf62 0.00943763310946427   | 2 | 0.995292299568251    |
| 0.0483032725234233             |   |                      |
| ZFYVE19 0.152283956286368      | 2 | 0.926684628256145    |
| 0.135702683389094              |   |                      |
| SPINT1-AS1 0.00313215137492861 | 2 | 0.998435149969158    |
| 0.0318823625357348             |   |                      |
| SPINT1 0.133395398734314       | 2 | 0.935477954174       |
| 0.144721177980537              |   |                      |
| VPS18 4.91194399042015 2       |   | 0.0857797773740248   |
| 0.85216101862086               |   |                      |
| CHAC1 1.74309312996667 2       |   | 0.418304114231069    |
| 0.447120412197031              |   |                      |
| IN080 0.23749687161493 2       |   | 0.888031169509086    |
| 0.113965781298374              |   |                      |
| CHP1 0.703435102452637         | 2 | 0.703478790639887    |
| 0.100187606735321              |   |                      |
| OIP5 3.60593775136077 2        |   | 0.164808864142568    |
| 1.47075205380263               |   |                      |
| NUSAP1 1.53143937828603 2      |   | 0.464999155677839    |
| 0.286463152524545              |   |                      |
| NDUFAF1 7.59862594701454 2     |   | 0.0223861464498655   |
| 0.713738914653017              |   |                      |
| RTF1 10.5633569743439 2        |   | 0.00508389038242929  |
| 0.374339237165767              |   |                      |
| RPAP1 0.295105219806894        | 2 | 0.862817044405902    |
| 0.351121914924837              |   |                      |
| MGA 3.89740877933187 2         |   | 0.142458522806582    |
| 0.501905515964661              |   |                      |
| EHD4 11.2826609858343 2        |   | 0.00354814448324126  |
| 0.837013020743654              |   |                      |
| VPS39 5.90755640611487 2       |   | 0.0521423290112597   |
| 0.941330010944055              |   |                      |
| TMEM87A 11.4973513625887 2     |   | 0.00318699860489924  |
| 0.500775005199828              |   |                      |
| GANC 5.42275657445309 2        |   | 0.0664451630543776   |
| 2.18362466960432               |   |                      |
| ZNF106 4.29502663822193 2      |   | 0.116774177145876    |
| 0.172455996589036              |   |                      |
| SNAP23 32.9825694272381 2      |   | 6.88535044535143e-08 |

|                              |   |                     |
|------------------------------|---|---------------------|
| 0.340506138666954            |   |                     |
| LRR57 2.35813639313254 2     |   | 0.307565195424871   |
| 0.579835492789963            |   |                     |
| HAUS2 0.0138243935141161     | 2 | 0.993111637527573   |
| 0.0385967971337535           |   |                     |
| CDAN1 0.0973502623084151     | 2 | 0.952490513935024   |
| 0.303456140595729            |   |                     |
| TTBK2 0.524107475327507      | 2 | 0.769469673093982   |
| 0.432987248688003            |   |                     |
| UBR1 0.791894704363149       | 2 | 0.673042129204447   |
| 0.336840369913733            |   |                     |
| TMEM62 0.0910354834822693    | 2 | 0.9555026501409     |
| 0.166994240705452            |   |                     |
| CCNDBP1 13.3921801249792 2   |   | 0.00123573411241984 |
| 0.20232681423308             |   |                     |
| LCMT2 0.382947966942007      | 2 | 0.825741107744503   |
| 0.36765178317778             |   |                     |
| ADAL 1.75577295124745 2      |   | 0.415660492543876   |
| 0.463190313772992            |   |                     |
| ZSCAN29 3.4157256583197 2    |   | 0.181252747061677   |
| 1.12462219725446             |   |                     |
| TUBGCP4 2.93292332783751 2   |   | 0.230740479839151   |
| 0.464315155845449            |   |                     |
| TP53BP1 1.69717249220809 2   |   | 0.428019618812448   |
| 0.459218359376166            |   |                     |
| CATSPER2 0.50206024645692 2  |   | 0.777998935366301   |
| 0.481547345762197            |   |                     |
| PDIA3 3.53133094134698 2     |   | 0.171072904595577   |
| 0.181546696457601            |   |                     |
| ELL3 1.69697568258951 2      |   | 0.428061740073841   |
| 0.486874018531062            |   |                     |
| SERF2 194.395798602127 2     | 0 | 0.408795719508685   |
| HYPK 0.512144304094554       | 2 | 0.774086114879328   |
| 0.343624569136309            |   |                     |
| MFAP1 6.53661801075297 2     |   | 0.0380707501086418  |
| 0.35493324595246             |   |                     |
| WDR76 4.84047076963883 2     |   | 0.0889006891237214  |
| 0.500734028076873            |   |                     |
| CASC4 1.01286157141861 2     |   | 0.602642705712264   |
| 0.298926275513802            |   |                     |
| CTDSPL2 0.000229286324552303 | 2 | 0.999885363409      |
| 0.00459290076795096          |   |                     |
| EIF3J-DT 0.724061835725745   | 2 | 0.696260840611791   |
| 0.322242771853355            |   |                     |
| EIF3J 1.76421587984413 2     |   | 0.413909495101309   |
| 0.140225398418488            |   |                     |
| SPG11 0.903567657357684      | 2 | 0.63649174611618    |
| 0.173424796336824            |   |                     |
| B2M 133.895873427191 2       | 0 | 0.230924141861395   |
| TRIM69 1.94904864516389 2    |   | 0.377371818128246   |

|                               |                      |                   |
|-------------------------------|----------------------|-------------------|
| 0.578636400907785             |                      |                   |
| SORD 0.694145079114332        | 2                    | 0.70675405877179  |
| 0.379494281333255             |                      |                   |
| DUOX1 0.000645293208295282    | 2                    | 0.99967740544067  |
| 0.0131972074313131            |                      |                   |
| SHF 0.363020091583831         | 2                    | 0.834009866971817 |
| 0.657437410936834             |                      |                   |
| GATM 0.0492426585156253       | 2                    | 0.975679303291001 |
| 0.0641389467695593            |                      |                   |
| SPATA5L1 0.976421104145367    | 2                    | 0.613723638653837 |
| 0.478648147885617             |                      |                   |
| SLC30A4 22.8712582483768 2    | 1.08036218433583e-05 |                   |
| 0.842826226911816             |                      |                   |
| AC090527.3 2.84020908362431 2 | 0.241688748996486    |                   |
| 2.42106194529249              |                      |                   |
| BLOC1S6 37.5495344935936 2    | 7.01814251158339e-09 |                   |
| 0.636405099997917             |                      |                   |
| SQOR 3.1361948188919 2        | 0.208441383940969    |                   |
| 0.329768241097778             |                      |                   |
| MYEF2 0.0153952900321248      | 2                    | 0.99233190598036  |
| 0.0477652259693943            |                      |                   |
| DUT 3.97996382902093 2        | 0.136697897671566    |                   |
| 0.245217335478834             |                      |                   |
| CEP152 1.83488965647395 2     | 0.399538627740106    |                   |
| 0.751784293181828             |                      |                   |
| EID1 10.21925139751 2         | 0.00603834265983749  |                   |
| 0.291508361289191             |                      |                   |
| SECISBP2L 2.43208900743366 2  | 0.296400261378492    |                   |
| 0.27063232092733              |                      |                   |
| COPS2 0.0311509297462074      | 2                    | 0.984545205369208 |
| 0.0319701395798682            |                      |                   |
| GALK2 1.90527337512493 2      | 0.385722651362565    |                   |
| 0.524702382805162             |                      |                   |
| FAM227B 4.28846609533802 2    | 0.117157857087465    |                   |
| 2.02097528563905              |                      |                   |
| DTWD1 2.99172158693733 2      | 0.224055656052621    |                   |
| 0.392434152882749             |                      |                   |
| GABPB1 1.74443910636094 2     | 0.418022695205842    |                   |
| 0.381602598814691             |                      |                   |
| GABPB1-AS1 13.9860180749553 2 | 0.0009182792336766   |                   |
| 0.604266430466466             |                      |                   |
| USP8 2.49000500724429 2       | 0.287940187236439    |                   |
| 0.180309935033196             |                      |                   |
| TRPM7 0.755172539532081       | 2                    | 0.685514059895695 |
| 0.310134902934071             |                      |                   |
| SPPL2A 0.945834129910216      | 2                    | 0.623181752641157 |
| 0.177375869857508             |                      |                   |
| AP4E1 0.549940013996275       | 2                    | 0.759594905414726 |
| 0.432131973947597             |                      |                   |
| DMXL2 7.59581568064191 2      | 0.022417624077106    |                   |

|                  |                    |   |                      |
|------------------|--------------------|---|----------------------|
| 1.63380558921313 |                    |   |                      |
| LYSMD2           | 25.3026506776467   | 2 | 3.20331182246392e-06 |
|                  | 0.447651583358898  |   |                      |
| TMOD2            | 3.18272075812085   | 2 | 0.203648384212138    |
|                  | 0.914432724977944  |   |                      |
| TMOD3            | 4.59335577088637   | 2 | 0.100592468950762    |
|                  | 0.518326335878406  |   |                      |
| LE01             | 0.555008798739651  | 2 | 0.75767223131529     |
|                  | 0.158992412207126  |   |                      |
| MAPK6            | 0.624397645948044  | 2 | 0.731836007950808    |
|                  | 0.394899774908822  |   |                      |
| GNB5             | 5.50328765632395   | 2 | 0.0638228611128209   |
|                  | 0.280391950649956  |   |                      |
| CERNA1           | 2.613738490678     | 2 | 0.270666120502367    |
|                  | 1.8861882629279    |   |                      |
| MY05A            | 0.12708724949746   | 2 | 0.938433179496021    |
|                  | 0.160966768190753  |   |                      |
| ARPP19           | 1.79972764776196   | 2 | 0.406625028588847    |
|                  | 0.187942885891642  |   |                      |
| FAM214A          | 7.12897519320393   | 2 | 0.028311488671127    |
|                  | 0.593158780487673  |   |                      |
| RSL24D1          | 14.4141640746431   | 2 | 0.000741317138298059 |
|                  | 0.189077440344992  |   |                      |
| RAB27A           | 0.668635383918146  | 2 | 0.715826333829508    |
|                  | 0.279472213660766  |   |                      |
| PIGB0S1          | 0.157883990836837  | 2 | 0.92409352454878     |
|                  | 0.0866507660964771 |   |                      |
| PIGB             | 0.0623257176453034 | 2 | 0.969317698281606    |
|                  | 0.103552671728106  |   |                      |
| CCPG1            | 1.24542243979313   | 2 | 0.536487927284287    |
|                  | 0.539337139454462  |   |                      |
| RFX7             | 3.2162534448673    | 2 | 0.200262409997177    |
|                  | 0.946984916206048  |   |                      |
| TEX9             | 0.300587987115748  | 2 | 0.860454971017581    |
|                  | 0.0836097368112365 |   |                      |
| AC084782.1       | 0.721506429002209  | 2 | 0.69715102400256     |
|                  | 0.463427522072507  |   |                      |
| ZNF280D          | 3.50178393219483   | 2 | 0.173619012091305    |
|                  | 0.50717374145258   |   |                      |
| TCF12            | 1.82996880440364   | 2 | 0.400522873317041    |
|                  | 0.619385817668212  |   |                      |
| LINC00926        | 8.37261809879626   | 2 | 0.0152022923591645   |
|                  | 0.718515048973277  |   |                      |
| POLR2M           | 2.03279867015564   | 2 | 0.361895662051799    |
|                  | 0.405432452566717  |   |                      |
| ADAM10           | 1.85719160235604   | 2 | 0.395108131394486    |
|                  | 0.426823668115912  |   |                      |
| MINDY2           | 0.256561042331826  | 2 | 0.879606596264423    |
|                  | 0.232564572410493  |   |                      |
| RNF111           | 1.27111007578388   | 2 | 0.529641435654002    |

|                             |   |                                    |
|-----------------------------|---|------------------------------------|
| 0.388972967544584           |   |                                    |
| SLTM 3.33633756165097 2     |   | 0.188592103098077                  |
| 0.0942055316350795          |   |                                    |
| CCNB2 0.928559179525294     | 2 | 0.628587783187214                  |
| 0.372157772153963           |   |                                    |
| MY01E 4.49867310043413 2    |   | 0.105469174856209                  |
| 0.215175017042182           |   |                                    |
| FAM81A 8.39294520094414 2   |   | 0.0150485656124522                 |
| 0.8915282636032             |   |                                    |
| GTF2A2 4.08422183441745 2   |   | 0.129754520533378                  |
| 0.130730781883001           |   |                                    |
| BNIP2 3.35336942828785 2    |   | 0.18699288440832 0.280323331540965 |
| ANXA2 37.4776623550883 2    |   | 7.27493343344321e-09               |
| 0.99804939051332            |   |                                    |
| ICE2 0.576939037972179      | 2 | 0.749409647565263                  |
| 0.241890014217107           |   |                                    |
| VPS13C 1.80960038524605 2   |   | 0.404622723631757                  |
| 0.244771105341674           |   |                                    |
| TPM1 1.97213743806909 2     |   | 0.37304033851438 0.9134373280656   |
| LACTB 1.13487664152461 2    |   | 0.566975990605357                  |
| 0.314198533401989           |   |                                    |
| RPS27L 0.581912922331117    | 2 | 0.747548224687956                  |
| 0.0682197215916756          |   |                                    |
| RAB8B 0.011451035736643     | 2 | 0.994290841671937                  |
| 0.0242446964083893          |   |                                    |
| APH1B 2.08526864951916 2    |   | 0.352524792891364                  |
| 0.576465050992053           |   |                                    |
| USP3 1.77652626169027 2     |   | 0.411369627836914                  |
| 0.324155661708774           |   |                                    |
| USP3-AS1 2.35213507219338 2 |   | 0.308489480187458                  |
| 1.06089099593853            |   |                                    |
| FBXL22 2.44022192734073 2   |   | 0.295197408918597                  |
| 1.33668347239465            |   |                                    |
| HERC1 2.69384430961001 2    |   | 0.26003939120569 0.698182589782211 |
| DAPK2 0.377860222798435     | 2 | 0.827844361557107                  |
| 0.445022327564057           |   |                                    |
| FAM96A 0.588251033970062    | 2 | 0.745182952455557                  |
| 0.0801021699186195          |   |                                    |
| SNX1 0.101214431394531      | 2 | 0.950651998391297                  |
| 0.0512245856857106          |   |                                    |
| SNX22 21.9782431134132 2    |   | 1.68843811325647e-05               |
| 1.28368172828887            |   |                                    |
| PPIB 46.0097638639046 2     |   | 1.02119090961139e-10               |
| 0.366325252513452           |   |                                    |
| CSNK1G1 0.260742402347442   | 2 | 0.877769541355001                  |
| 0.264190860268836           |   |                                    |
| PCLAF 40.3913481676508 2    |   | 1.69484581924451e-09               |
| 1.35937863668262            |   |                                    |
| TRIP4 5.03808504721976 2    |   | 0.0805366818162436                 |
| 0.458843597541174           |   |                                    |



|            |                    |   |                      |
|------------|--------------------|---|----------------------|
| ZNF609     | 0.603866833646581  | 2 | 0.739387294005452    |
|            | 0.289266476551981  |   |                      |
| OAZ2       | 11.5725401429884   | 2 | 0.00306940952967028  |
|            | 0.368123251654631  |   |                      |
| PIF1       | 4.57591374287123   | 2 | 0.101473573760791    |
|            | 0.906559251811888  |   |                      |
| PLEKH02    | 0.218143494817647  | 2 | 0.896666081722357    |
|            | 0.214323253366332  |   |                      |
| ANKDD1A    | 4.16055859693096   | 2 | 0.124895324254325    |
|            | 1.42850195081277   |   |                      |
| AC103691.1 | 5.43404839556112   | 2 | 0.0660710766299787   |
|            | 1.20731793508746   |   |                      |
| SPG21      | 0.770694659054331  | 2 | 0.680214336646138    |
|            | 0.102322481027455  |   |                      |
| MTFMT      | 2.11393898080147   | 2 | 0.347507340520382    |
|            | 0.324631707422983  |   |                      |
| PDCD7      | 1.16645739522601   | 2 | 0.558093539234462    |
|            | 0.171818563842359  |   |                      |
| CLPX       | 2.64010173345435   | 2 | 0.267121714012917    |
|            | 0.342571926613279  |   |                      |
| PARP16     | 0.396601762593291  | 2 | 0.820123056322825    |
|            | 0.209209427320842  |   |                      |
| DPP8       | 0.564596050399826  | 2 | 0.754048925461064    |
|            | 0.205423654380604  |   |                      |
| HACD3      | 0.131785489552562  | 2 | 0.936231274601568    |
|            | 0.088265946614847  |   |                      |
| INTS14     | 1.34523380531454   | 2 | 0.510371236858296    |
|            | 0.232963478818454  |   |                      |
| DENND4A    | 23.6897608322741   | 2 | 7.17519645554443e-06 |
|            | 1.26781763733786   |   |                      |
| RAB11A     | 16.2534048805302   | 2 | 0.000295541160358459 |
|            | 0.379155104574239  |   |                      |
| MEGF11     | 2.69427494354127   | 2 | 0.259983406340494    |
|            | 3.20244941155142   |   |                      |
| DIS3L      | 0.0940557400535081 | 2 | 0.954060807519609    |
|            | 0.0931223893354344 |   |                      |
| TIPIN      | 1.73929375304112   | 2 | 0.419099517000332    |
|            | 0.509446566448263  |   |                      |
| MAP2K1     | 2.37307043501222   | 2 | 0.30527715273269     |
|            | 0.119953558080247  |   |                      |
| AC116913.1 | 0.168357130138226  | 2 | 0.919267092446718    |
|            | 0.292552426712366  |   |                      |
| SNAPC5     | 3.87637632641288   | 2 | 0.143964553896063    |
|            | 0.56429812997726   |   |                      |
| RPL4       | 41.8208476246312   | 2 | 8.29312729599962e-10 |
|            | 0.278784417717634  |   |                      |
| ZWILCH     | 1.77767266715994   | 2 | 0.411133897208384    |
|            | 0.544528696928891  |   |                      |
| SMAD3      | 1.93407647190976   | 2 | 0.380207456925434    |
|            | 0.596903361429507  |   |                      |
| AAGAB      | 0.49787439177744   | 2 | 0.779628935749603    |

|                             |   |                                    |
|-----------------------------|---|------------------------------------|
| 0.193833099936244           |   |                                    |
| C15orf61 0.0631057465030269 | 2 | 0.968939724105607                  |
| 0.0964191793636021          |   |                                    |
| MAP2K5 1.37274713511107 2   |   | 0.503398302903221                  |
| 0.500035419597158           |   |                                    |
| PIAS1 0.0424680228565631    | 2 | 0.978989842950544                  |
| 0.0295560992393911          |   |                                    |
| CLN6 0.237359754005419      | 2 | 0.888092053951712                  |
| 0.256042520543274           |   |                                    |
| FEM1B 0.471333451123597     | 2 | 0.790043931509284                  |
| 0.317756390759727           |   |                                    |
| ANP32A 0.427959277370122    | 2 | 0.807364823864772                  |
| 0.0615989605837344          |   |                                    |
| GLCE 1.18466808229113 2     |   | 0.553034970787474                  |
| 0.904570690167511           |   |                                    |
| KIF23 2.61821550115747 2    |   | 0.270060910608883                  |
| 1.25888625166971            |   |                                    |
| RPLP1 41.1565319859937 2    |   | 1.15603937533848e-09               |
| 0.195916236255676           |   |                                    |
| TLE3 0.283521843496937      | 2 | 0.867828710656808                  |
| 0.191508607099927           |   |                                    |
| UACA 2.488255784938 2       |   | 0.288192133096903                  |
| 7.50243467528139            |   |                                    |
| MY09A 1.15490788161488 2    |   | 0.561325717237089                  |
| 0.242994008275695           |   |                                    |
| SENP8 2.03500294562074 2    |   | 0.361497022905379                  |
| 1.05924871248618            |   |                                    |
| PKM 82.5559257484526 2      | 0 | 0.53797674195678                   |
| PARP6 2.99402498740568 2    |   | 0.223797759639263                  |
| 0.900908232715352           |   |                                    |
| HEXA 0.876650797154411      | 2 | 0.645115828926926                  |
| 0.166191525370376           |   |                                    |
| ARIH1 0.283812213417996     | 2 | 0.867702724125601                  |
| 0.186778921240354           |   |                                    |
| BBS4 0.0328119054795333     | 2 | 0.983727891953381                  |
| 0.106548102726978           |   |                                    |
| ADPGK 2.71697257114546 2    |   | 0.257049582270413                  |
| 0.201409421578062           |   |                                    |
| STOML1 1.71948802072158 2   |   | 0.423270421292764                  |
| 0.649565552726244           |   |                                    |
| PML 1.94026926468868 2      |   | 0.37903200470073 0.427742558722886 |
| SEMA7A 6.04475362445006 2   |   | 0.0486853647652766                 |
| 2.07558360194768            |   |                                    |
| UBL7 1.32791752241737 2     |   | 0.514809288131891                  |
| 0.173543720956901           |   |                                    |
| UBL7-AS1 1.95896342477887 2 |   | 0.375505668361169                  |
| 0.470948809949803           |   |                                    |
| ARID3B 4.22939941928384 2   |   | 0.12066952000643 1.50815198859225  |
| CLK3 1.70297287723254 2     |   | 0.426780077841431                  |
| 0.238859045103095           |   |                                    |

|            |                    |   |                      |
|------------|--------------------|---|----------------------|
| EDC3       | 0.173291039800464  | 2 | 0.917002097021327    |
|            | 0.0594122730922505 |   |                      |
| CSK        | 8.20077503379514   | 2 | 0.0165662544541983   |
|            | 0.324368770354395  |   |                      |
| ULK3       | 9.21545894066156   | 2 | 0.00997443987833413  |
|            | 1.58972430601786   |   |                      |
| SCAMP2     | 4.65406787583128   | 2 | 0.097584760720247    |
|            | 0.343167635261167  |   |                      |
| MPI        | 0.373974509049584  | 2 | 0.829454308107353    |
|            | 0.209167634737569  |   |                      |
| FAM219B    | 0.16041303110862   | 2 | 0.922925728186158    |
|            | 0.119865816651268  |   |                      |
| COX5A      | 2.48985599559725   | 2 | 0.287961641256428    |
|            | 0.081319990029655  |   |                      |
| RPP25      | 12.5780210038393   | 2 | 0.00185659613656564  |
|            | 1.35212602114173   |   |                      |
| SCAMP5     | 17.9324827237452   | 2 | 0.000127647070772952 |
|            | 2.69227839081855   |   |                      |
| PPCDC      | 3.11363195931999   | 2 | 0.210806215035278    |
|            | 0.394924551260816  |   |                      |
| C15orf39   | 2.94155849423011   | 2 | 0.229746386205959    |
|            | 1.22003043490246   |   |                      |
| COMMD4     | 0.575402488687903  | 2 | 0.749985621218707    |
|            | 0.105105275871591  |   |                      |
| AC068338.3 | 2.61479630542641   | 2 | 0.270523001047091    |
|            | 1.08368294277596   |   |                      |
| NEIL1      | 49.1865670363925   | 2 | 2.08579820082377e-11 |
|            | 0.538773183632349  |   |                      |
| MAN2C1     | 0.571850389556463  | 2 | 0.751318816415496    |
|            | 0.344514301441937  |   |                      |
| AC068338.2 | 0.650239089213393  | 2 | 0.722440984556336    |
|            | 0.244281639903485  |   |                      |
| SIN3A      | 0.40243026408087   | 2 | 0.817736491309433    |
|            | 0.215142778189432  |   |                      |
| PTPN9      | 0.199228954156204  | 2 | 0.905186320851899    |
|            | 0.131586842617798  |   |                      |
| SNUPN      | 0.0750598996035139 | 2 | 0.963165570670941    |
|            | 0.0695545351792774 |   |                      |
| IMP3       | 1.07195674949552   | 2 | 0.58509656631573     |
| UBE2Q2     | 1.97949104215092   | 2 | 0.130742385376123    |
|            | 0.588550796006585  |   | 0.371671261491346    |
| FBX022     | 0.511935972459697  | 2 | 0.774166752392008    |
|            | 0.187722837058334  |   |                      |
| ETFA       | 0.0141175066378429 | 2 | 0.992966101165346    |
|            | 0.0132531343581061 |   |                      |
| ISL2       | 3.14662736562808   | 2 | 0.20735692757051     |
| SCAPER     | 0.613231703232209  | 2 | 1.1439010637637      |
|            | 0.376193943647835  |   | 0.735933254183627    |
| RCN2       | 5.88474381866875   | 2 | 0.0527404846154574   |
|            | 0.202758522183977  |   |                      |

|            |                     |   |                      |
|------------|---------------------|---|----------------------|
| PSTPIP1    | 8.50311443753106    | 2 | 0.0142420386621928   |
|            | 0.852030341579146   |   |                      |
| TSPAN3     | 0.0187797210818218  | 2 | 0.990654086539693    |
|            | 0.0299586588707822  |   |                      |
| HMG20A     | 0.0473976926462871  | 2 | 0.976579766064912    |
|            | 0.0701114823995039  |   |                      |
| TBC1D2B    | 0.63467571609883    | 2 | 0.728084724281537    |
|            | 0.380835871606321   |   |                      |
| CIB2       | 0.00420915072513354 | 2 | 0.997897637703368    |
|            | 0.0452723623433669  |   |                      |
| IDH3A      | 0.33682404592457    | 2 | 0.845005601238528    |
|            | 0.114396309485378   |   |                      |
| DNAJA4     | 0.013290421722268   | 2 | 0.993376819726249    |
|            | 0.117020438690504   |   |                      |
| WDR61      | 15.3939273804556    | 2 | 0.000454204195948549 |
|            | 0.543790703764264   |   |                      |
| IREB2      | 0.890642411785227   | 2 | 0.640618472553142    |
|            | 0.254001785955826   |   |                      |
| PSMA4      | 30.0547744557848    | 2 | 2.9763818631956e-07  |
|            | 0.321542705653289   |   |                      |
| CHRNA5     | 0.290739331143574   | 2 | 0.864702583246656    |
|            | 0.171925047642479   |   |                      |
| ADAMTS7    | 0.297035320841285   | 2 | 0.861984784022202    |
|            | 0.409149477094429   |   |                      |
| MORF4L1    | 9.62030167262262    | 2 | 0.00814663079726186  |
|            | 0.160631039442508   |   |                      |
| CTSH       | 12.7501016329667    | 2 | 0.00170353322603511  |
|            | 0.312322176275303   |   |                      |
| RASGRF1    | 6.59036501586611    | 2 | 0.0370612804522306   |
|            | 0.949112815398595   |   |                      |
| AC011944.1 | 2.06140806252922    | 2 | 0.356755704963503    |
|            | 0.553673104243692   |   |                      |
| TMED3      | 0.0691228528039222  | 2 | 0.966028998178394    |
|            | 0.0561559975270351  |   |                      |
| MTHFS      | 3.18782235823079    | 2 | 0.203129579866875    |
|            | 0.282123727622518   |   |                      |
| ST20       | 0.00216564673453519 | 2 | 0.998917762674409    |
|            | 0.0051125306371084  |   |                      |
| ST20-AS1   | 0.0120251332864458  | 2 | 0.994005472663311    |
|            | 0.0683807943772013  |   |                      |
| BCL2A1     | 35.2395315565702    | 2 | 2.2275781552672e-08  |
|            | 1.20710516857237    |   |                      |
| ZFAND6     | 2.58309763035817    | 2 | 0.27484476951585     |
|            | 0.121487232363319   |   |                      |
| FAH        | 5.91749419959865    | 2 | 0.051883881793045    |
|            | 1.18137402751186    |   |                      |
| MESD       | 0.860027210709407   | 2 | 0.650500244376551    |
|            | 0.169414507825834   |   |                      |
| TLNRD1     | 10.4617650481195    | 2 | 0.00534880277195571  |
|            | 0.832232801427965   |   |                      |
| IL16       | 1.93555241169604    | 2 | 0.37992697877402     |
|            |                     |   | 0.126102918877035    |

|            |                      |   |                      |
|------------|----------------------|---|----------------------|
| STARD5     | 0.0624655477653686   | 2 | 0.969249930745553    |
|            | 0.1586876034904      |   |                      |
| EFL1       | 0.346554241566147    | 2 | 0.840904550425114    |
|            | 0.256527624817632    |   |                      |
| RPS17      | 23.4428472870198     | 2 | 8.11802513367432e-06 |
|            | 0.218821191789403    |   |                      |
| SNHG21     | 0.0212992528116568   | 2 | 0.989406880096525    |
|            | 0.0643825012735458   |   |                      |
| WHAMM      | 2.48726388247208     | 2 | 0.288335097789469    |
|            | 0.31388399400646     |   |                      |
| HOMER2     | 1.3385301928624      | 2 | 0.512084772463018    |
|            | 1.16941676970194     |   |                      |
| RAMMET     | 2.27917788487826     | 2 | 0.319950512866675    |
|            | 0.200053635050712    |   |                      |
| C15orf40   | 1.03972006033489     | 2 | 0.594603768735807    |
|            | 0.180781718544251    |   |                      |
| BTBD1      | 1.8208646282142      | 2 | 0.402350244742698    |
|            | 0.341513281121796    |   |                      |
| TM6SF1     | 2.29216339242699     | 2 | 0.317879882287997    |
|            | 1.50305437221641     |   |                      |
| ZSCAN2     | 0.00128995237504995  | 2 | 0.999355231764906    |
|            | 0.0300747312488415   |   |                      |
| WDR73      | 2.64550855979217     | 2 | 0.266400548896405    |
|            | 0.421422720872356    |   |                      |
| SEC11A     | 1.78053389144318     | 2 | 0.410546144586469    |
|            | 0.13656703102043     |   |                      |
| ZNF592     | 0.648554579983069    | 2 | 0.723049720128947    |
|            | 0.401545518521634    |   |                      |
| AKAP13     | 3.74230865761716     | 2 | 0.153945855075679    |
|            | 0.23915793400371     |   |                      |
| KLHL25     | 0.222920718514181    | 2 | 0.894526850409355    |
|            | 0.466890211873879    |   |                      |
| MRPL46     | 0.0399239296876962   | 2 | 0.980235956025377    |
|            | 0.0371260150836752   |   |                      |
| MRPS11     | 0.125136487221244    | 2 | 0.939348956061667    |
|            | 0.0529510860609355   |   |                      |
| DET1       | 0.953470802771429    | 2 | 0.620806772174916    |
|            | 0.640190875230766    |   |                      |
| AEN        | 0.366171628455781    | 2 | 0.832696695446993    |
|            | 0.233825464973179    |   |                      |
| ISG20      | 88.2207668797293     | 2 | 0.620280665079417    |
| MFGE8      | 7.10298744821565     | 2 | 0.0286817649969258   |
|            | 2.07960070560457     |   |                      |
| ABHD2      | 5.51501645288344     | 2 | 0.0634496737650511   |
|            | 1.68128796132957     |   |                      |
| FANCI      | 4.47034226378816     | 2 | 0.106973821653884    |
|            | 2.3272178003041      |   |                      |
| POLG       | 0.000255826539845924 | 2 | 0.999872094910631    |
|            | 0.00450393767460234  |   |                      |
| AC124068.2 | 0.429429799122906    | 2 | 0.806771418277499    |

|                               |   |                                    |
|-------------------------------|---|------------------------------------|
| 0.662393553419314             |   |                                    |
| PEX11A 2.06872982427586 2     |   | 0.35545205254083 0.519553347994489 |
| AP3S2 0.19564337638411 2      |   | 0.906810584373474                  |
| 0.232777627082957             |   |                                    |
| ZNF710 0.311407975413447      | 2 | 0.855812483896143                  |
| 0.438914150991678             |   |                                    |
| IDH2 32.184913470343 2        |   | 1.0259704197324e-07                |
| 0.731914139304182             |   |                                    |
| SEMA4B 2.91212695735691 2     |   | 0.2331522795302 0.904051625551345  |
| CIB1 5.14861154433064 2       |   | 0.0762067092576162                 |
| 0.241992857024666             |   |                                    |
| GDPGP1 0.892070741853695      | 2 | 0.640161128568739                  |
| 0.93016950445346              |   |                                    |
| NGRN 0.398268333386279        | 2 | 0.819439944409781                  |
| 0.139688987627694             |   |                                    |
| IQGAP1 6.15667207618515 2     |   | 0.0460357947619943                 |
| 0.29444617593366              |   |                                    |
| CRTC3 0.735577105038789       | 2 | 0.692263543596465                  |
| 0.23803890870713              |   |                                    |
| BLM 1.99927917590954 2        |   | 0.368012053249293                  |
| 0.519330228467385             |   |                                    |
| FURIN 2.77504885421239 2      |   | 0.249692672558691                  |
| 1.21286080105124              |   |                                    |
| FES 1.16737892505422 2        |   | 0.557836448546526                  |
| 0.414981850612295             |   |                                    |
| MAN2A2 2.8337180190622 2      |   | 0.242474431923309                  |
| 1.17285203188511              |   |                                    |
| HDDC3 0.0040064834152007      | 2 | 0.997998763441913                  |
| 0.0129889437538236            |   |                                    |
| UNC45A 0.197939700142689      | 2 | 0.905770016513248                  |
| 0.0831779602616225            |   |                                    |
| RCCD1 3.71345570770167 2      |   | 0.15618284826451 0.658416811538927 |
| PRC1 2.88642027405642 2       |   | 0.236168407573613                  |
| 0.714035891328476             |   |                                    |
| VPS33B 0.431244145258567      | 2 | 0.806039868846083                  |
| 0.243427761786036             |   |                                    |
| SLC03A1 6.28370898806222 2    |   | 0.0432026045935958                 |
| 0.378304005542677             |   |                                    |
| CHD2 3.26621163112659 2       |   | 0.19532199700591 0.63755406339356  |
| MCTP2 9.35435538753605 2      |   | 0.00930523909616243                |
| 0.712178904900469             |   |                                    |
| LRRC28 0.0321089767922982     | 2 | 0.984073697996912                  |
| 0.0714317613463502            |   |                                    |
| MEF2A 1.55065606817302 2      |   | 0.460552679239634                  |
| 0.209473424037988             |   |                                    |
| LINS1 0.22752155177784 2      |   | 0.892471431031942                  |
| 0.101540327723855             |   |                                    |
| ASB7 0.336960171982299        | 2 | 0.844948089555132                  |
| 0.291509147080413             |   |                                    |
| AC015712.2 1.31834714287273 2 |   | 0.517278651746949                  |

|                            |   |                                  |
|----------------------------|---|----------------------------------|
| 0.335224256352134          |   |                                  |
| LRRK1 13.0475128804658 2   |   | 0.00146814373679804              |
| 0.840696970944994          |   |                                  |
| SELENOS 10.9148058075142 2 |   | 0.00426461699580849              |
| 0.271303258720257          |   |                                  |
| SNRPA1 4.31573200745959 2  |   | 0.115571487194954                |
| 0.272083460374442          |   |                                  |
| TM2D3 0.504119910566852    | 2 | 0.777198139537312                |
| 0.184042162574209          |   |                                  |
| TARSL2 0.0413220819872608  | 2 | 0.979550935915869                |
| 0.0690955678727835         |   |                                  |
| POLR3K 0.849577565211826   | 2 | 0.653907887264468                |
| 0.158893508942263          |   |                                  |
| SNRNP25 0.588229166037275  | 2 | 0.74519110030546                 |
| 0.115366698377871          |   |                                  |
| MPG 0.636868274220888      | 2 | 0.72728697760004                 |
| 0.0929015383621417         |   |                                  |
| NPRL3 0.189685254577146    | 2 | 0.90951605621406                 |
| 0.115527604357666          |   |                                  |
| LUC7L 0.841866234859053    | 2 | 0.656434003934527                |
| 0.175572748989246          |   |                                  |
| FAM234A 1.59869750258138 2 |   | 0.449621684331644                |
| 0.432816067711544          |   |                                  |
| AXIN1 2.09479918731277 2   |   | 0.350848913639375                |
| 1.30598248571713           |   |                                  |
| MRPL28 3.75088508437237 2  |   | 0.153287115817217                |
| 0.227792091226063          |   |                                  |
| TMEM8A 1.10678076888042 2  |   | 0.574997040910747                |
| 0.43501418480539           |   |                                  |
| NME4 1.94008562354285 2    |   | 0.379066809234416                |
| 0.537391968555323          |   |                                  |
| CAPN15 3.47473296974271 2  |   | 0.17598324543432 1.7731156225097 |
| PIGQ 0.0230541866894782    | 2 | 0.988539089054764                |
| 0.076596425068507          |   |                                  |
| RAB40C 2.31054071213681 2  |   | 0.314972370699534                |
| 0.820922569309471          |   |                                  |
| METTL26 1.43898816160855 2 |   | 0.486998575573481                |
| 0.168569136303123          |   |                                  |
| MCRIP2 1.61244103298924 2  |   | 0.446542581239623                |
| 0.253107993669576          |   |                                  |
| RHOT2 3.2006044069607 2    |   | 0.201835513382615                |
| 0.312444024845164          |   |                                  |
| STUB1 5.85018196638159 2   |   | 0.0536598095499368               |
| 0.247459775235601          |   |                                  |
| JMJD8 1.07862137467293 2   |   | 0.583150086602804                |
| 0.427098117819184          |   |                                  |
| WDR24 0.61314781626518 2   |   | 0.735964122435299                |
| 0.319040628689774          |   |                                  |
| METRNL 0.266196164860755   | 2 | 0.875379228575747                |
| 0.299063076562266          |   |                                  |

|            |                    |   |                    |
|------------|--------------------|---|--------------------|
| FAM173A    | 0.984905865370174  | 2 | 0.611125504421708  |
|            | 0.0677310930762665 |   |                    |
| HAGHL      | 1.59626095467443   | 2 | 0.450169780516446  |
|            | 0.445699893748271  |   |                    |
| NARFL      | 1.51280920418906   | 2 | 0.469350900263261  |
|            | 0.190049057765989  |   |                    |
| RPUSD1     | 0.101552473373475  | 2 | 0.950491331828279  |
|            | 0.0752748534299786 |   |                    |
| CHTF18     | 1.12398423782104   | 2 | 0.570072280150958  |
|            | 0.904405324702157  |   |                    |
| LMF1       | 0.367741826358362  | 2 | 0.832043202706454  |
|            | 0.411307609632163  |   |                    |
| UBE2I      | 2.31657935923529   | 2 | 0.314022801453095  |
|            | 0.117219726526585  |   |                    |
| AL031714.1 | 1.17491796106987   | 2 | 0.555737632256427  |
|            | 1.17163992865945   |   |                    |
| TSR3       | 0.161818757999185  | 2 | 0.922277265346215  |
|            | 0.0701489875376883 |   |                    |
| GNPTG      | 1.98309200509344   | 2 | 0.371002676339835  |
|            | 0.485486083157929  |   |                    |
| UNKL       | 1.61875862137958   | 2 | 0.445134270578884  |
|            | 0.214374195185699  |   |                    |
| C16orf91   | 14.4263759117978   | 2 | 0.000736804507111  |
|            | 0.420023878337069  |   |                    |
| CLCN7      | 0.201713802790304  | 2 | 0.904062393697201  |
|            | 0.150881679250536  |   |                    |
| TEL02      | 1.09396497743247   | 2 | 0.578693392259477  |
|            | 0.263591765428621  |   |                    |
| AL031708.1 | 1.74589532929652   | 2 | 0.417718438867373  |
|            | 1.37755751501421   |   |                    |
| JPT2       | 2.16910277749649   | 2 | 0.338053406444653  |
|            | 0.319452057050305  |   |                    |
| MAPK8IP3   | 2.08999780559822   | 2 | 0.351692205254856  |
|            | 0.861548711639427  |   |                    |
| NME3       | 3.19891795434437   | 2 | 0.202005778173207  |
|            | 0.450359069450803  |   |                    |
| MRPS34     | 0.201569415805894  | 2 | 0.904127663474571  |
|            | 0.0432392000719833 |   |                    |
| EME2       | 1.05581512932293   | 2 | 0.589837876956891  |
|            | 0.87678431932088   |   |                    |
| SPSB3      | 4.78770025078822   | 2 | 0.0912775763687383 |
|            | 0.20459606859119   |   |                    |
| NUBP2      | 6.976915337619     | 2 | 0.0305479509138787 |
|            | 0.423843409753703  |   |                    |
| HAGH       | 1.74940695087349   | 2 | 0.416985647835318  |
|            | 0.299552253313348  |   |                    |
| FAHD1      | 0.249749466565001  | 2 | 0.882607456999036  |
|            | 0.147399641464097  |   |                    |
| MSRB1      | 0.376368662108977  | 2 | 0.828461981886376  |
|            | 0.145831486778538  |   |                    |



|           |                      |   |                      |
|-----------|----------------------|---|----------------------|
| NDUFB10   | 1.80095125909591     | 2 | 0.406376329177633    |
|           | 0.0988554570007652   |   |                      |
| RPS2      | 57.7071657106719     | 2 | 2.94431146130592e-13 |
|           | 0.239214168022202    |   |                      |
| SNHG9     | 0.0130999514300683   | 2 | 0.993471428617783    |
|           | 0.0220461327263054   |   |                      |
| TBL3      | 0.120940440106759    | 2 | 0.941321801113996    |
|           | 0.0944919363876755   |   |                      |
| GFER      | 0.767491416826584    | 2 | 0.681304655195201    |
|           | 0.192734756632551    |   |                      |
| SYNGR3    | 0.000238866621158264 | 2 | 0.999880573821295    |
|           | 0.0122241912706801   |   |                      |
| ZNF598    | 0.0918412009672274   | 2 | 0.955117795071148    |
|           | 0.147981448890276    |   |                      |
| NTHL1     | 3.74453721484578     | 2 | 0.153774412037001    |
|           | 0.528269564793843    |   |                      |
| TSC2      | 2.05851311106365     | 2 | 0.357272474104138    |
|           | 0.434031885734537    |   |                      |
| PKD1      | 4.36643377908783     | 2 | 0.112678472794087    |
|           | 1.7082930816558      |   |                      |
| SNHG19    | 6.03811518773363     | 2 | 0.0488472306072097   |
|           | 0.602251377796653    |   |                      |
| TRAF7     | 1.74455509096714     | 2 | 0.417998453809913    |
|           | 0.279335682538253    |   |                      |
| MLST8     | 3.63559612417589     | 2 | 0.162382914659455    |
|           | 0.479781454171426    |   |                      |
| PGP       | 3.24529557478018     | 2 | 0.197375398503732    |
|           | 0.407659125932998    |   |                      |
| E4F1      | 0.209234564712976    | 2 | 0.900669158610883    |
|           | 0.158080542273484    |   |                      |
| ECI1      | 9.99644987988199     | 2 | 0.00674991788105728  |
|           | 0.9826120274295      |   |                      |
| RNPS1     | 0.892451988842556    | 2 | 0.640039110447543    |
|           | 0.066874910874246    |   |                      |
| CCNF      | 6.10333009657926     | 2 | 0.0472801351072687   |
|           | 2.06283687990021     |   |                      |
| TEDC2     | 1.00118521720302     | 2 | 0.606171330907795    |
|           | 0.559886202077227    |   |                      |
| TBC1D24   | 0.999824469119583    | 2 | 0.606583894479035    |
|           | 0.669056502548011    |   |                      |
| AMDHD2    | 2.35464126926764     | 2 | 0.308103154573697    |
|           | 0.530827892549369    |   |                      |
| PDPK1     | 0.96875800504631     | 2 | 0.616079661912631    |
|           | 0.295764030066763    |   |                      |
| KCTD5     | 0.278970770728664    | 2 | 0.869805735005428    |
|           | 0.138112067021987    |   |                      |
| SRRM2-AS1 | 0.787902048553416    | 2 | 0.674387084026877    |
|           | 0.609139762148508    |   |                      |
| SRRM2     | 1.84671322543612     | 2 | 0.397183609519951    |
|           | 0.132070438725551    |   |                      |

|            |                    |   |                    |
|------------|--------------------|---|--------------------|
| ELOB       | 9.05884721881682   | 2 | 0.0107868917441576 |
|            | 0.15874956207244   |   |                    |
| FLYWCH2    | 0.417315329280376  | 2 | 0.811673052473904  |
|            | 0.295069041352359  |   |                    |
| FLYWCH1    | 0.205023884205959  | 2 | 0.902567371136074  |
|            | 0.249675581028478  |   |                    |
| KREMEN2    | 2.20792073139972   | 2 | 0.331555399490683  |
|            | 0.700500054478608  |   |                    |
| PKMYT1     | 3.50664535636185   | 2 | 0.173197506747288  |
|            | 1.73845249988272   |   |                    |
| PAQR4      | 0.685215926524255  | 2 | 0.709916470350008  |
|            | 0.465862298391317  |   |                    |
| TNFRSF12A  | 0.0389647330257976 | 2 | 0.980706188306118  |
|            | 0.17608476375846   |   |                    |
| HCFC1R1    | 7.05161682918882   | 2 | 0.0294280077194866 |
|            | 0.558203769211063  |   |                    |
| THOC6      | 1.61247201028195   | 2 | 0.446535664953062  |
|            | 0.225783354878583  |   |                    |
| MMP25-AS1  | 5.68061793584794   | 2 | 0.0584076170961856 |
|            | 1.80801069440333   |   |                    |
| ZNF213-AS1 | 2.34026981465751   | 2 | 0.310325073314716  |
|            | 0.740044652173404  |   |                    |
| ZNF213     | 1.96291248648017   | 2 | 0.374764952358352  |
|            | 0.941895554655813  |   |                    |
| ZNF200     | 0.277242832677021  | 2 | 0.870557544942439  |
|            | 0.333722852632494  |   |                    |
| LINC00921  | 3.15466015790783   | 2 | 0.206525770252874  |
|            | 0.951487902672585  |   |                    |
| ZNF263     | 1.18826653594783   | 2 | 0.552040830041554  |
|            | 0.377598426934118  |   |                    |
| ZNF75A     | 0.614566152076979  | 2 | 0.735442385321248  |
|            | 0.174184887457627  |   |                    |
| ZSCAN32    | 0.668856651451277  | 2 | 0.715747143646624  |
|            | 0.36593466695439   |   |                    |
| ZNF174     | 0.736086046403955  | 2 | 0.692087405231975  |
|            | 0.360156554894467  |   |                    |
| NAA60      | 4.29435183186954   | 2 | 0.11681358377173   |
|            | 0.579637117244032  |   | 0.512383432655453  |
| CLUAP1     | 2.13558641667989   | 2 | 0.343766301582631  |
|            | 0.579637117244032  |   |                    |
| NLRC3      | 0.0993163849585847 | 2 | 0.951554617445458  |
|            | 0.120269411018609  |   |                    |
| SLX4       | 3.35476825465805   | 2 | 0.186862144845261  |
|            | 0.691637244227887  |   |                    |
| DNASE1     | 0.1369456765102    | 2 | 0.933818823907736  |
|            | 0.0641079621766051 |   |                    |
| TRAP1      | 0.0975376236467369 | 2 | 0.95240128816574   |
|            | 0.0737208342992874 |   |                    |
| CREBBP     | 3.41213244537488   | 2 | 0.181578679618791  |
|            | 0.458298882099995  |   |                    |
| LINC01569  | 2.34824638674989   | 2 | 0.309089872958505  |

|                    |                     |   |                                   |
|--------------------|---------------------|---|-----------------------------------|
| 1.54658553600763   |                     |   |                                   |
| TFAP4              | 3.29426545055835    | 2 | 0.192601358670472                 |
| 1.33704694552119   |                     |   |                                   |
| COR07              | 4.77188790734114    | 2 | 0.0920020928639567                |
| 0.576224150853414  |                     |   |                                   |
| DNAJA3             | 0.184398515320113   | 2 | 0.911923423713                    |
| 0.0280256460484764 |                     |   |                                   |
| NMRAL1             | 0.0631362417123522  | 2 | 0.968924950208386                 |
| 0.0652476711973184 |                     |   |                                   |
| HMOX2              | 0.48720571297613    | 2 | 0.783798853088669                 |
| 0.124841806720715  |                     |   |                                   |
| CDIP1              | 0.143075574407128   | 2 | 0.930961098513667                 |
| 0.260864322428562  |                     |   |                                   |
| UBALD1             | 0.344006485884609   | 2 | 0.841976442683047                 |
| 0.160653433372753  |                     |   |                                   |
| MGRN1              | 0.0103100126485413  | 2 | 0.994858257918624                 |
| 0.0350586106491934 |                     |   |                                   |
| NUDT16L1           | 1.83503020260628    | 2 | 0.399510551922181                 |
| 0.194770560289272  |                     |   |                                   |
| ANKS3              | 0.675378932294964   | 2 | 0.713416793569356                 |
| 0.346480323188312  |                     |   |                                   |
| ZNF500             | 0.886232980976635   | 2 | 0.642032412062229                 |
| 0.541866054255119  |                     |   |                                   |
| ROGDI              | 0.00465701331304133 | 2 | 0.997674202212157                 |
| 0.0188479422914873 |                     |   |                                   |
| GLYR1              | 0.0919970514294733  | 2 | 0.955043370196043                 |
| 0.0731291588706105 |                     |   |                                   |
| UBN1               | 3.24637692074731    | 2 | 0.197268711802049                 |
| 0.372396684084523  |                     |   |                                   |
| NAGPA              | 1.08501678491121    | 2 | 0.581288322857804                 |
| 0.319849568138645  |                     |   |                                   |
| ALG1               | 3.70092417056928    | 2 | 0.157164526117151                 |
| 0.523548395332636  |                     |   |                                   |
| EEF2KMT            | 5.46107011377278    | 2 | 0.0651844029720811                |
| 1.07556596886354   |                     |   |                                   |
| METTL22            | 0.581283984963198   | 2 | 0.747783342160973                 |
| 0.305452199803993  |                     |   |                                   |
| ABAT               | 2.10805344862622    | 2 | 0.348531479498917                 |
| 1.16803051612418   |                     |   |                                   |
| TMEM186            | 0.280050695608676   | 2 | 0.869336199355639                 |
| 0.190600958663431  |                     |   |                                   |
| PMM2               | 4.25845884226762    | 2 | 0.118928902650937                 |
| 0.600099253011229  |                     |   |                                   |
| CARHSP1            | 10.1864053743594    | 2 | 0.00613832922417168               |
| 0.219542481361989  |                     |   |                                   |
| USP7               | 2.93095142383233    | 2 | 0.230968091065761                 |
| 0.277698857810941  |                     |   |                                   |
| AC022167.3         | 0.491006608590193   | 2 | 0.782310698804833                 |
| 0.0665290196217939 |                     |   |                                   |
| C16orf72           | 2.37368602200366    | 2 | 0.3051832048697 0.415754553889948 |

|            |                    |   |                      |
|------------|--------------------|---|----------------------|
| ATF7IP2    | 0.365550876693796  | 2 | 0.832955184529755    |
|            | 0.140543599292243  |   |                      |
| NUBP1      | 5.28804006622816   | 2 | 0.0710749707406315   |
|            | 0.240844995815305  |   |                      |
| TVP23A     | 0.0461839400566051 | 2 | 0.977172609047939    |
|            | 0.155758786497642  |   |                      |
| AC133065.1 | 4.70499947120483   | 2 | 0.0951310622428603   |
|            | 1.90069135051966   |   |                      |
| CIITA      | 6.34369406427559   | 2 | 0.0419260875123423   |
|            | 0.643008001061755  |   |                      |
| DEXI       | 21.0454183186519   | 2 | 2.691816664524e-05   |
|            | 0.603784940621595  |   |                      |
| CLEC16A    | 5.31611839075372   | 2 | 0.0700841093998383   |
|            | 0.582423261748245  |   |                      |
| RMI2       | 33.5791754105137   | 2 | 5.10945650233907e-08 |
|            | 0.856855045518959  |   |                      |
| SOCS1      | 5.93490802944816   | 2 | 0.0514340942209126   |
|            | 0.258844263285584  |   |                      |
| AC009121.2 | 5.5992309402821    | 2 | 0.0608334504063839   |
|            | 1.27271623083785   |   |                      |
| LITAF      | 31.4982183619911   | 2 | 1.44626803533221e-07 |
|            | 0.546599805707599  |   |                      |
| SNN        | 3.63245224716287   | 2 | 0.162638371344306    |
|            | 0.421800882884043  |   |                      |
| TXNDC11    | 4.8854793956263    | 2 | 0.0869223838815533   |
|            | 0.342772013632687  |   |                      |
| ZC3H7A     | 2.71286652277522   | 2 | 0.257577853370711    |
|            | 0.185156074554387  |   |                      |
| AC010654.1 | 0.186807711228994  | 2 | 0.910825583982688    |
|            | 0.431125574714992  |   |                      |
| RSL1D1     | 1.13097296905967   | 2 | 0.568083715583965    |
|            | 0.105892035061202  |   |                      |
| GSPT1      | 3.93400538839657   | 2 | 0.139875478114795    |
|            | 0.172404356582002  |   |                      |
| TNFRSF17   | 7.03732131163902   | 2 | 0.0296391055593537   |
|            | 0.230110973530435  |   |                      |
| SNX29      | 23.8233767726088   | 2 | 6.71149797792925e-06 |
|            | 0.907104114048554  |   |                      |
| CPPED1     | 1.16414626853945   | 2 | 0.558738824432677    |
|            | 0.238612672804929  |   |                      |
| ERCC4      | 13.2559776030965   | 2 | 0.0013228208677426   |
|            | 0.875475182690712  |   |                      |
| MKL2       | 1.56848998016252   | 2 | 0.456464206720577    |
|            | 1.01082076900923   |   |                      |
| MIR193BHG  | 5.73576467684476   | 2 | 0.0568191229408469   |
|            | 0.589009934680901  |   |                      |
| PARN       | 4.58498158322162   | 2 | 0.101014542070326    |
|            | 0.356787253890899  |   |                      |
| BFAR       | 10.0490970067106   | 2 | 0.0065745542140897   |
|            | 0.570787706335181  |   |                      |

|            |                    |   |                      |
|------------|--------------------|---|----------------------|
| NOM01      | 8.88032318078787   | 2 | 0.0117940325633956   |
|            | 2.10221820266254   |   |                      |
| PDXDC1     | 2.4289270063302    | 2 | 0.296869240986086    |
|            | 0.339528940624615  |   |                      |
| NTAN1      | 1.07638637346621   | 2 | 0.583802121433236    |
|            | 0.23929268956729   |   |                      |
| RRN3       | 9.28747637094625   | 2 | 0.00962166275704013  |
|            | 0.501056310327789  |   |                      |
| MARF1      | 1.95719363850375   | 2 | 0.375838097810794    |
|            | 0.414155424516216  |   |                      |
| NDE1       | 2.95304871216706   | 2 | 0.228430252468018    |
|            | 0.341672454731569  |   |                      |
| AC026401.3 | 0.177059344456934  | 2 | 0.915275952055911    |
|            | 0.198836961184133  |   |                      |
| MYH11      | 3.91999524853027   | 2 | 0.140858755563704    |
|            | 1.43212508970594   |   |                      |
| FOPNL      | 0.0125233823918522 | 2 | 0.99375787233749     |
|            | 0.0250998011139023 |   |                      |
| ABCC1      | 0.195848225212131  | 2 | 0.906717709587155    |
|            | 0.343346659480645  |   |                      |
| NOM03      | 3.66661551768734   | 2 | 0.159883834974893    |
|            | 2.66080753228005   |   |                      |
| XYLT1      | 0.28083967009806   | 2 | 0.868993324947881    |
|            | 0.397361334913208  |   |                      |
| AC109446.3 | 0.0228174912882765 | 2 | 0.988656087306008    |
|            | 0.102038017897633  |   |                      |
| RPS15A     | 78.5853827920415   | 2 | 0.277178739523972    |
| ARL6IP1    | 23.0531754506371   | 2 | 9.86430644756009e-06 |
|            | 0.632858607127098  |   |                      |
| SMG1       | 3.42217647449783   | 2 | 0.180669074781794    |
|            | 0.379113838461897  |   |                      |
| COQ7       | 2.11805896751562   | 2 | 0.346792214537652    |
|            | 0.344596721781208  |   |                      |
| ITPRIPL2   | 4.46849540700201   | 2 | 0.107072649941516    |
|            | 0.86211247625966   |   |                      |
| SYT17      | 11.9927512014329   | 2 | 0.00248775246474586  |
|            | 0.57030832816855   |   |                      |
| TMC5       | 4.5391180040504    | 2 | 0.103357750592802    |
|            | 0.68674172405102   |   |                      |
| GDE1       | 0.938488933089284  | 2 | 0.62547465683627     |
|            | 0.262880998078072  |   |                      |
| CCP110     | 0.721973014225846  | 2 | 0.69698840278924     |
|            | 0.359311177146212  |   |                      |
| VPS35L     | 1.83070434186397   | 2 | 0.400375600611328    |
|            | 0.39159122087977   |   |                      |
| KNOP1      | 1.89178030958874   | 2 | 0.388333739862655    |
|            | 0.208904806302194  |   |                      |
| THUMPD1    | 0.8885737943601    | 2 | 0.641281412603967    |
|            | 0.108839765332507  |   |                      |
| REX05      | 1.66911367088397   | 2 | 0.434066801837436    |

|                  |                     |   |                      |
|------------------|---------------------|---|----------------------|
| 1.45793612195806 |                     |   |                      |
| LYRM1            | 0.00155788545427544 | 2 | 0.999221360569993    |
|                  | 0.00681020591402523 |   |                      |
| AC008551.1       | 1.33314146929812    | 2 | 0.513466374535246    |
|                  | 0.901193414977517   |   |                      |
| TMEM159          | 7.23891890202533    | 2 | 0.0267971577548576   |
|                  | 0.799138455628045   |   |                      |
| CRYM             | 16.858336342881     | 2 | 0.000218403088777297 |
|                  | 2.70529385912975    |   |                      |
| METTL9           | 2.41115056022182    | 2 | 0.299519642248135    |
|                  | 0.226429612683327   |   |                      |
| NPIP4            | 2.60724094868875    | 2 | 0.271546882666502    |
|                  | 1.54582903632344    |   |                      |
| UQCRC2           | 1.49642450467267    | 2 | 0.473211780243702    |
|                  | 0.112081194110863   |   |                      |
| MOSM0            | 0.767359711843462   | 2 | 0.681349522281546    |
|                  | 0.54949020908781    |   |                      |
| EEF2K            | 1.81707731226118    | 2 | 0.403112880350609    |
|                  | 1.07038995224179    |   |                      |
| POLR3E           | 0.0908743094363497  | 2 | 0.955579654357633    |
|                  | 0.0721853351772121  |   |                      |
| CDR2             | 0.460685915069552   | 2 | 0.794261157938851    |
|                  | 0.39159349867199    |   |                      |
| NPIP5            | 0.136291837073148   | 2 | 0.934124157601886    |
|                  | 0.141134502067607   |   |                      |
| COG7             | 2.13515156442723    | 2 | 0.34384105348416     |
| AC008915.2       | 0.777852395152792   | 2 | 0.681124265119849    |
|                  | 0.481915783671133   |   | 0.677784290291444    |
| GGA2             | 26.3636084862005    | 2 | 1.88458250738321e-06 |
|                  | 0.306724780651122   |   |                      |
| EARS2            | 1.5725910283123     | 2 | 0.45552917485567     |
| UBFD1            | 2.74735340350847    | 2 | 0.68654025221167     |
|                  | 0.376060648943961   |   | 0.253174399472031    |
| NDUFAB1          | 0.0276280822560928  | 2 | 0.986280934900859    |
|                  | 0.0142978572158696  |   |                      |
| PALB2            | 1.31518453925588    | 2 | 0.518097272487062    |
|                  | 0.837525300169642   |   |                      |
| DCTN5            | 0.586509284198254   | 2 | 0.745832196238273    |
|                  | 0.184475648495703   |   |                      |
| PRKCB            | 38.7790739871865    | 2 | 3.79516862381024e-09 |
|                  | 1.04682469744057    |   |                      |
| RBBP6            | 0.172934847163712   | 2 | 0.917165426262486    |
|                  | 0.0662132122448907  |   |                      |
| TNRC6A           | 0.0503434850338993  | 2 | 0.975142424232035    |
|                  | 0.0544354890049883  |   |                      |
| AC008731.1       | 0.682915413309519   | 2 | 0.710733526282614    |
|                  | 0.579538206045038   |   |                      |
| ARHGAP17         | 0.129661538705463   | 2 | 0.937226057329865    |
|                  | 0.0832979926513406  |   |                      |
| LCMT1            | 1.0082997812238     | 2 | 0.604018839316798    |

|                   |                    |   |                      |
|-------------------|--------------------|---|----------------------|
| 0.177511418659038 |                    |   |                      |
| ZKSCAN2           | 0.0801541659838818 | 2 | 0.960715381482058    |
| 0.104482696156579 |                    |   |                      |
| AC008741.2        | 3.78251836282137   | 2 | 0.150881701737786    |
| 1.10265050912223  |                    |   |                      |
| KDM8              | 1.10811650903575   | 2 | 0.574613145802674    |
| 0.471931445197921 |                    |   |                      |
| NSMCE1            | 17.0360509584487   | 2 | 0.000199833611689404 |
| 0.390966547430903 |                    |   |                      |
| AC106739.1        | 1.39428508511186   | 2 | 0.49800630442188     |
| 1.12836723486511  |                    |   |                      |
| IL4R              | 60.4281205386687   | 2 | 7.54951656745106e-14 |
| 0.723942790419448 |                    |   |                      |
| IL21R             | 12.2008101201194   | 2 | 0.0022419594073263   |
| 0.768947850426384 |                    |   |                      |
| GTF3C1            | 0.0035014889045655 | 2 | 0.998250787206808    |
| 0.030348013455031 |                    |   |                      |
| XP06              | 1.49802485517223   | 2 | 0.47283327934297     |
| 0.500914094698009 |                    |   |                      |
| CLN3              | 2.96428335133199   | 2 | 0.227150683974832    |
| 3.06357515001544  |                    |   |                      |
| SGF29             | 4.8519682894993    | 2 | 0.0883910865990587   |
| 0.476739134335198 |                    |   |                      |
| SULT1A1           | 0.549323189046637  | 2 | 0.75982921008875     |
| 0.434536376276014 |                    |   |                      |
| EIF3C             | 0.063505118719336  | 2 | 0.968746259619792    |
| 0.243742070760902 |                    |   |                      |
| ATXN2L            | 1.3233659814721    | 2 | 0.515982210053171    |
| 0.229793262697579 |                    |   |                      |
| TUFM              | 2.00396168734051   | 2 | 0.367151450764613    |
| 0.114116599503725 |                    |   |                      |
| SH2B1             | 1.36923786605032   | 2 | 0.504282358318292    |
| 0.212641664985538 |                    |   |                      |
| ATP2A1-AS1        | 0.315839409783735  | 2 | 0.853918344681642    |
| 0.129852536180124 |                    |   |                      |
| RABEP2            | 5.17386507803265   | 2 | 0.0752505144361046   |
| 0.422663481072147 |                    |   |                      |
| CD19              | 12.9901092042655   | 2 | 0.00151089271307636  |
| 0.17610746388565  |                    |   |                      |
| NFATC2IP          | 2.11261052010636   | 2 | 0.347738242119388    |
| 0.198674093748099 |                    |   |                      |
| SPNS1             | 0.521893009710039  | 2 | 0.770322127006738    |
| 0.178512687683344 |                    |   |                      |
| LAT               | 2.18513990949307   | 2 | 0.335353541881398    |
| 1.79115228435413  |                    |   |                      |
| NPIP11            | 0.476197251206667  | 2 | 0.788124957961114    |
| 0.356948459346562 |                    |   |                      |
| BOLA2-SMG1P6      | 3.39846676499087   | 2 | 0.182823626135562    |
| 0.471881989037599 |                    |   |                      |
| SPN               | 0.305890152371089  | 2 | 0.858176854863365    |
| 0.222308032728443 |                    |   |                      |

|            |                    |   |                      |
|------------|--------------------|---|----------------------|
| C16orf54   | 0.0545401026058748 | 2 | 0.973098419542141    |
|            | 0.076560216532519  |   |                      |
| KIF22      | 0.177922626315395  | 2 | 0.914880966745508    |
|            | 0.140241715467562  |   |                      |
| MAZ        | 0.0893175781545413 | 2 | 0.956323734273286    |
|            | 0.0735348689810692 |   |                      |
| AC009133.1 | 0.0232647105488028 | 2 | 0.988435038999054    |
|            | 0.133936240205276  |   |                      |
| PAGR1      | 0.791985977888659  | 2 | 0.673011414441339    |
|            | 0.230066411175201  |   |                      |
| MVP        | 3.03876926880334   | 2 | 0.218846516142228    |
|            | 0.373585290262106  |   |                      |
| CDIPT      | 3.1955403522876    | 2 | 0.202347213966536    |
|            | 0.208353697959159  |   |                      |
| KCTD13     | 1.19136049252801   | 2 | 0.551187495077749    |
|            | 0.578154474213052  |   |                      |
| TMEM219    | 5.15610941598514   | 2 | 0.0759215500507684   |
|            | 0.350143626800144  |   |                      |
| TAOK2      | 5.28979310173825   | 2 | 0.0710126995617215   |
|            | 1.24241630648446   |   |                      |
| HIRIP3     | 1.58474367725162   | 2 | 0.452769624236931    |
|            | 0.31029084221388   |   |                      |
| IN080E     | 1.00646046508132   | 2 | 0.604574585626675    |
|            | 0.220363561794036  |   |                      |
| ALDOA      | 5.52934174500698   | 2 | 0.0629968299252479   |
|            | 0.286523805529953  |   |                      |
| PPP4C      | 0.499583690721126  | 2 | 0.778962910940847    |
|            | 0.0550826839746073 |   |                      |
| YPEL3      | 11.3646181125263   | 2 | 0.00340568543799624  |
|            | 0.441819344527891  |   |                      |
| AC012645.1 | 1.22937001888996   | 2 | 0.54081121890875     |
|            | 1.32395128253584   |   |                      |
| MAPK3      | 0.0353634000648829 | 2 | 0.982473703942075    |
|            | 0.0533375947047871 |   |                      |
| COR01A     | 14.8243179115973   | 2 | 0.000603865567118111 |
|            | 0.112972705546205  |   |                      |
| AC012645.3 | 3.29211097055443   | 2 | 0.192808948350342    |
|            | 0.909429243827275  |   |                      |
| BOLA2B     | 0.0576196503984788 | 2 | 0.971601220966649    |
|            | 0.0999842724563539 |   |                      |
| SLX1A      | 1.34982356661947   | 2 | 0.509201338683035    |
|            | 1.05902647203544   |   |                      |
| SULT1A3    | 0.0913535443685428 | 2 | 0.955350708213046    |
|            | 0.171207318007805  |   |                      |
| CD2BP2     | 4.66821544547289   | 2 | 0.0968969028686117   |
|            | 0.223424243625453  |   |                      |
| TBC1D10B   | 1.13127364521016   | 2 | 0.567998317391046    |
|            | 0.363521114189698  |   |                      |
| MYLPF      | 5.8951442495195    | 2 | 0.0524669346097483   |
|            | 0.625346150830173  |   |                      |



|            |                    |   |                     |
|------------|--------------------|---|---------------------|
| ZNF48      | 0.18542646534893   | 2 | 0.911454838289073   |
|            | 0.0770530795170696 |   |                     |
| SEPT1      | 0.0355622727506313 | 2 | 0.982376015206971   |
|            | 0.0193956854328923 |   |                     |
| ZNF771     | 0.173596966858031  | 2 | 0.916861839872052   |
|            | 0.154401928943146  |   |                     |
| DCTPP1     | 2.13230695984041   | 2 | 0.34433044735361    |
| SEPHS2     | 10.7551010103219   | 2 | 0.173768381814208   |
|            | 0.221397179236479  |   | 0.00461912260084663 |
| ITGAL      | 1.39717268535696   | 2 | 0.497287801670518   |
|            | 0.281032665039515  |   |                     |
| ZNF768     | 0.076760155170728  | 2 | 0.962347104808678   |
|            | 0.205569980213696  |   |                     |
| ZNF747     | 0.364209145543853  | 2 | 0.833514172970636   |
|            | 0.304613607168333  |   |                     |
| AC002310.1 | 0.11369406458741   | 2 | 0.944738572806592   |
|            | 0.247918124199615  |   |                     |
| ZNF764     | 0.0100976776077594 | 2 | 0.99496388516       |
|            | 0.0527462793218717 |   |                     |
| ZNF688     | 0.729023545515286  | 2 | 0.694535659344341   |
|            | 0.266513094731686  |   |                     |
| ZNF785     | 3.28323230597743   | 2 | 0.193666794062505   |
|            | 1.27097888077603   |   |                     |
| ZNF689     | 0.112944690783378  | 2 | 0.945092620299989   |
|            | 0.164340798626963  |   |                     |
| PRR14      | 0.018461296542148  | 2 | 0.990811823381921   |
|            | 0.0302114232118995 |   |                     |
| FBR5       | 9.60010459612036   | 2 | 0.00822931666046789 |
|            | 1.19939136681955   |   |                     |
| AC093249.6 | 0.369531905945739  | 2 | 0.831298824103892   |
|            | 0.31316404554059   |   |                     |
| PHKG2      | 0.37487429219126   | 2 | 0.829081227534936   |
|            | 0.152250770832874  |   |                     |
| CCDC189    | 7.15007003918435   | 2 | 0.0280144447026152  |
|            | 0.853495735166753  |   |                     |
| RNF40      | 0.130659282781614  | 2 | 0.936758618062392   |
|            | 0.13135019113415   |   |                     |
| BCL7C      | 8.5444546812825    | 2 | 0.0139506756158854  |
|            | 0.597825132705487  |   |                     |
| MIR762HG   | 1.12604396648389   | 2 | 0.569485485254729   |
|            | 0.940035432105579  |   |                     |
| FBXL19     | 0.511892528626873  | 2 | 0.774183568960136   |
|            | 0.427675004281913  |   |                     |
| ORAI3      | 5.1046842230205    | 2 | 0.0778990040233318  |
|            | 0.503349516036226  |   |                     |
| SETD1A     | 2.37615703626957   | 2 | 0.304806381675031   |
|            | 1.03414039679022   |   |                     |
| STX4       | 2.30149115942718   | 2 | 0.316400779412825   |
|            | 0.214756184250172  |   |                     |
| ZNF668     | 1.65327001189646   | 2 | 0.437519061081071   |

|                             |   |                                    |
|-----------------------------|---|------------------------------------|
| 0.576513274295906           |   |                                    |
| ZNF646 0.0299312341138337   | 2 | 0.985145811233112                  |
| 0.148568118202848           |   |                                    |
| VKORC1 6.41993264759904 2   |   | 0.0403579723523146                 |
| 0.381328018397352           |   |                                    |
| BCKDK 2.29704061387018 2    |   | 0.317105641418603                  |
| 0.254304858727818           |   |                                    |
| KAT8 0.423440004605416      | 2 | 0.809191237532863                  |
| 0.165362570260512           |   |                                    |
| FUS 5.54362808784295 2      |   | 0.0625484361536908                 |
| 0.172432538568993           |   |                                    |
| PYCARD 1.51640693319584 2   |   | 0.46850736052346 0.199978808441027 |
| ARMC5 0.00361367579420895   | 2 | 0.998194793451813                  |
| 0.0354280369004345          |   |                                    |
| C16orf58 0.0054525088982318 | 2 | 0.997277458407714                  |
| 0.0349183253022419          |   |                                    |
| ZNF720 3.32592492905533 2   |   | 0.18957653364283 0.434795438888008 |
| ZNF267 10.5151908491127 2   |   | 0.0052078122524819                 |
| 0.661642709508426           |   |                                    |
| SHCBP1 1.94036683025593 2   |   | 0.379013514915452                  |
| 0.295204761910002           |   |                                    |
| VPS35 0.0309206864659574    | 2 | 0.984658554352362                  |
| 0.0218258794105599          |   |                                    |
| ORC6 17.6211307632882 2     |   | 0.00014914890604234                |
| 0.539557653564541           |   |                                    |
| C16orf87 0.202583928531666  | 2 | 0.903669155264848                  |
| 0.0655332136083733          |   |                                    |
| GPT2 8.30049147486768 2     |   | 0.0157605430535446                 |
| 0.727328135807351           |   |                                    |
| DNAJA2 2.1249562610296 2    |   | 0.345598310551468                  |
| 0.259625504363812           |   |                                    |
| NETO2 4.40907309751485 2    |   | 0.110301632889454                  |
| 3.46740791205245            |   |                                    |
| ITFG1 0.245097451857992     | 2 | 0.884662797876601                  |
| 0.110303246001268           |   |                                    |
| PHKB 1.23272111960855 2     |   | 0.539905821208142                  |
| 0.172853510827449           |   |                                    |
| LONP2 0.536105643991393     | 2 | 0.764867378214432                  |
| 0.0688199755087887          |   |                                    |
| SIAH1 4.74911362466307 2    |   | 0.0930557212213546                 |
| 0.566893559572499           |   |                                    |
| N4BP1 2.41606185428886 2    |   | 0.29878503007043 0.464675797013721 |
| CNEP1R1 2.89429236469089 2  |   | 0.235240665034991                  |
| 0.858452345053258           |   |                                    |
| HEATR3 3.10160593027542 2   |   | 0.212077614508661                  |
| 0.968636414409344           |   |                                    |
| TENT4B 4.41284801321599 2   |   | 0.110093639557598                  |
| 0.957531397512538           |   |                                    |
| ADCY7 2.01906849399391 2    |   | 0.364388655165417                  |
| 0.768090725105524           |   |                                    |

|            |                      |   |                      |
|------------|----------------------|---|----------------------|
| BRD7       | 1.84944765445553     | 2 | 0.396640945379673    |
|            | 0.12483333797796     |   |                      |
| SNX20      | 0.542584295532556    | 2 | 0.762393732240725    |
|            | 0.194514955819857    |   |                      |
| AC007728.2 | 5.94620684938726e-05 | 2 | 0.999970269407716    |
|            | 0.00720491778111718  |   |                      |
| CYLD       | 0.891162734815828    | 2 | 0.640451829958528    |
|            | 0.240222401413805    |   |                      |
| HNRNPA1P48 | 14.104134010514      | 2 | 0.00086561787016326  |
|            | 0.511177162537209    |   |                      |
| CHD9       | 1.10152918694989     | 2 | 0.576508846920474    |
|            | 0.133940213842296    |   |                      |
| RBL2       | 0.0401368883079428   | 2 | 0.980131586733705    |
|            | 0.0640758047551971   |   |                      |
| AKTIP      | 1.78597427994194     | 2 | 0.409430896857775    |
|            | 0.436438057358347    |   |                      |
| RPGRIP1L   | 1.11614849608752     | 2 | 0.572310130671459    |
|            | 1.00526391334762     |   |                      |
| FTO        | 0.000438361930513699 | 2 | 0.999780843053136    |
|            | 0.0107028452099175   |   |                      |
| CRNDE      | 2.26356597307952     | 2 | 0.322457805637107    |
|            | 3.86410190466683     |   |                      |
| AMFR       | 15.5263527039532     | 2 | 0.000425104153512046 |
|            | 0.399942443078995    |   |                      |
| AC092140.1 | 1.72702758337301     | 2 | 0.421677788188224    |
|            | 0.300740083537188    |   |                      |
| NUDT21     | 0.158940099341771    | 2 | 0.923605681848506    |
|            | 0.0575366630476862   |   |                      |
| OGFOD1     | 0.136351704133867    | 2 | 0.934096196386546    |
|            | 0.119668524056616    |   |                      |
| BBS2       | 0.0968554408108787   | 2 | 0.952726199480638    |
|            | 0.143457251773848    |   |                      |
| MT2A       | 20.773793471707      | 2 | 3.08338718810752e-05 |
|            | 1.69307500643913     |   |                      |
| MT1F       | 0.461217664762771    | 2 | 0.794050011945765    |
|            | 0.36291222865788     |   |                      |
| MT1X       | 3.93226550963572     | 2 | 0.139997214245412    |
|            | 0.970096012988669    |   |                      |
| NUP93      | 0.938678616024316    | 2 | 0.625415338714875    |
|            | 0.222190087735535    |   |                      |
| HERPUD1    | 39.595066919959      | 2 | 2.52371590292455e-09 |
|            | 0.27532452253358     |   |                      |
| NLRC5      | 2.31031557312234     | 2 | 0.31500782897982     |
|            | 0.777517175383079    |   |                      |
| CPNE2      | 2.70042886894287     | 2 | 0.259184676557411    |
|            | 18.4924507689071     |   |                      |
| FAM192A    | 0.0628620419370744   | 2 | 0.969057798816746    |
|            | 0.0325959200965961   |   |                      |
| RSPRY1     | 2.8915296229397      | 2 | 0.23556584418322     |
|            | 0.399988917167827    |   |                      |
| ARL2BP     | 6.94532800633717     | 2 | 0.0310342451122252   |
|            | 0.350057085154738    |   |                      |

|                               |                                    |
|-------------------------------|------------------------------------|
| CIAPIN1 7.53598342244248 2    | 0.0230984050054535                 |
| 0.302858629793761             |                                    |
| C0Q9 0.00389563206694144 2    | 0.998054079729114                  |
| 0.015289518208427             |                                    |
| POLR2C 0.192913549422203 2    | 0.908049147438183                  |
| 0.064961167921642             |                                    |
| DOK4 0.828194677337292 2      | 0.660936613444672                  |
| 0.740763278190177             |                                    |
| CCDC102A 4.49097071796884 2   | 0.105876139964961                  |
| 0.311626862587411             |                                    |
| ADGRG5 12.0149700439022 2     | 0.00246026792602272                |
| 1.05371725187408              |                                    |
| KATNB1 2.68280354882508 2     | 0.26147887716155 0.614328249520547 |
| USB1 0.801788951496367 2      | 0.669720729088136                  |
| 0.215399958192152             |                                    |
| CFAP20 0.073285021036805 2    | 0.964020701016739                  |
| 0.0489102605285524            |                                    |
| CSNK2A2 0.934351422577926 2   | 0.62676995018039                   |
| 0.337434571573861             |                                    |
| GINS3 4.5490246585044 2       | 0.102847051706204                  |
| 0.715397159912318             |                                    |
| AC009118.2 1.21861441900299 2 | 0.543727427817048                  |
| 0.585100698748466             |                                    |
| NDRG4 0.129374988122842 2     | 0.937360348286311                  |
| 0.292396407131006             |                                    |
| SETD6 2.07066121506959 2      | 0.355108959818081                  |
| 0.746382959680089             |                                    |
| CNOT1 0.45050886239893 2      | 0.798313077163921                  |
| 0.15591049096007              |                                    |
| SLC38A7 0.142176694897534 2   | 0.931379603480848                  |
| 0.194519831852245             |                                    |
| GOT2 0.848409239972155 2      | 0.654289987402467                  |
| 0.163817600280586             |                                    |
| TK2 0.373282742614249 2       | 0.829741252054037                  |
| 0.525756570249089             |                                    |
| CKLF 6.47432032565577 2       | 0.0392752722557371                 |
| 0.459401413314795             |                                    |
| CMTM3 8.09126257790408 2      | 0.0174986544609915                 |
| 1.68420758857191              |                                    |
| DYNC1LI2 0.397614973837737 2  | 0.819707682595794                  |
| 0.0625590161052395            |                                    |
| NAE1 2.48384875924256 2       | 0.288827868332942                  |
| 0.195369367988636             |                                    |
| FAM96B 6.93625813946012 2     | 0.0311753029503323                 |
| 0.237715405766755             |                                    |
| CES2 2.38564909157977 2       | 0.303363189581908                  |
| 0.488579883209298             |                                    |
| CES4A 0.075893362359977 2     | 0.962764272977689                  |
| 0.234800996849352             |                                    |
| CBFB 1.97210802115754 2       | 0.373045825402052                  |

|                               |   |  |                   |
|-------------------------------|---|--|-------------------|
| 0.276535980628776             |   |  |                   |
| C16orf70 0.879655076880288    | 2 |  | 0.64414750218726  |
| 0.52654805575847              |   |  |                   |
| TRADD 1.99178789300745 2      |   |  | 0.369393079249914 |
| 0.258320341439411             |   |  |                   |
| KIAA0895L 1.44484366526163 2  |   |  | 0.485574849779204 |
| 1.33004952806298              |   |  |                   |
| E2F4 0.0330562809919008       | 2 |  | 0.983607699792723 |
| 0.028266594810108             |   |  |                   |
| ELM03 0.93469200589356 2      |   |  | 0.626663225573917 |
| 0.803751996946649             |   |  |                   |
| LRRC29 0.605862090793078      | 2 |  | 0.738650027934252 |
| 0.696719505397756             |   |  |                   |
| TMEM208 2.92385045309977 2    |   |  | 0.231789597403294 |
| 0.234646430554516             |   |  |                   |
| FHOD1 4.56836942010945 2      |   |  | 0.101857071309495 |
| 0.902659806652354             |   |  |                   |
| ATP6V0D1 2.2821067974169 2    |   |  | 0.319482302252899 |
| 0.140646142866175             |   |  |                   |
| AC009061.2 1.35105028494289 2 |   |  | 0.5088891111404   |
| 0.605612337731456             |   |  |                   |
| AC027682.6 0.0482140247699196 | 2 |  | 0.976181240685548 |
| 0.211686153690046             |   |  |                   |
| RIPOR1 1.41635025742426 2     |   |  | 0.492542203964693 |
| 1.21004305558851              |   |  |                   |
| AC027682.4 0.591811134000586  | 2 |  | 0.743857669414652 |
| 0.329012187519095             |   |  |                   |
| AC027682.1 0.215194237381514  | 2 |  | 0.897989306669952 |
| 0.401272310799044             |   |  |                   |
| CTCF 2.77803180858358 2       |   |  | 0.249320539217337 |
| 0.274372906859718             |   |  |                   |
| CARMIL2 2.55936139033357 2    |   |  | 0.278126093282278 |
| 1.03109612847565              |   |  |                   |
| ACD 0.217922483312363         | 2 |  | 0.896765173957616 |
| 0.101138459181172             |   |  |                   |
| PARD6A 0.000809762965853583   | 2 |  | 0.99959520047052  |
| 0.00882451656365171           |   |  |                   |
| ENKD1 0.496071487827352       | 2 |  | 0.780332050658084 |
| 0.722396483431692             |   |  |                   |
| C16orf86 1.68667526943846 2   |   |  | 0.430272033310083 |
| 1.07156713976485              |   |  |                   |
| GFOD2 0.0207441878322352      | 2 |  | 0.989681510758998 |
| 0.0464597144117182            |   |  |                   |
| RANBP10 0.517805843638142     | 2 |  | 0.771897953855794 |
| 0.439387942176647             |   |  |                   |
| CENPT 0.449317624944649       | 2 |  | 0.79878870901636  |
| 0.240941162089062             |   |  |                   |
| THAP11 0.62485694450247 2     |   |  | 0.731667961637139 |
| 0.194851037507006             |   |  |                   |
| NUTF2 2.85752104118948 2      |   |  | 0.239605724626593 |

|                    |                    |   |                    |
|--------------------|--------------------|---|--------------------|
| 0.244133897339997  |                    |   |                    |
| PSKH1              | 0.642202952557308  | 2 | 0.725349641473055  |
| 0.521379427177018  |                    |   |                    |
| AC040162.1         | 0.519678067786801  | 2 | 0.771175708964863  |
| 0.80041980438652   |                    |   |                    |
| PSMB10             | 0.0511072242790162 | 2 | 0.974770118053287  |
| 0.0471299474774701 |                    |   |                    |
| DPEP2              | 0.0142686823035967 | 2 | 0.992891047846233  |
| 0.0665829810438307 |                    |   |                    |
| DUS2               | 4.83802719200903   | 2 | 0.0890093733724096 |
| 0.367675373886868  |                    |   |                    |
| DDX28              | 4.1859436046795    | 2 | 0.123320107735413  |
| 0.648771891695708  |                    |   |                    |
| NFATC3             | 1.19963449559188   | 2 | 0.548911941795402  |
| 0.263344179973392  |                    |   |                    |
| PLA2G15            | 2.44100753903624   | 2 | 0.295081476421105  |
| 0.587748296831377  |                    |   |                    |
| SLC7A6             | 4.96288239356565   | 2 | 0.0836226220524807 |
| 1.20564260302223   |                    |   |                    |
| SLC7A60S           | 0.441345465222986  | 2 | 0.80197909895267   |
| 0.154774395761423  |                    |   |                    |
| PRMT7              | 1.6477673145811    | 2 | 0.43872448607429   |
| ZFP90              | 0.154183219568683  | 2 | 0.452283990047415  |
| 0.249278812706184  |                    |   | 0.925805036921761  |
| TANG06             | 0.15272079000004   | 2 | 0.926482246814927  |
| 0.241046502180905  |                    |   |                    |
| CHTF8              | 0.86701490949154   | 2 | 0.648231460196877  |
| 0.152637765832649  |                    |   |                    |
| UTP4               | 1.17382289616594   | 2 | 0.556041999962861  |
| 0.256916578481224  |                    |   |                    |
| SNTB2              | 1.3752664883071    | 2 | 0.502764583066394  |
| 0.534129001673298  |                    |   |                    |
| VPS4A              | 1.46984101029768   | 2 | 0.479543578705128  |
| 0.277157462563631  |                    |   |                    |
| COG8               | 3.71954226281099   | 2 | 0.155708263021555  |
| 0.735089077252463  |                    |   |                    |
| COG8.1             | 0.183506718859291  | 2 | 0.912330139424073  |
| 0.200222381511009  |                    |   |                    |
| NIP7               | 2.76523427780257   | 2 | 0.250920997873766  |
| 0.307354551596996  |                    |   |                    |
| TERF2              | 2.45068722895807   | 2 | 0.293656778264507  |
| 0.162186660002908  |                    |   |                    |
| CYB5B              | 1.9252127712209    | 2 | 0.381896218880368  |
| 0.165241899106468  |                    |   |                    |
| NFAT5              | 0.865197536995215  | 2 | 0.648820766917291  |
| 0.216521165948276  |                    |   |                    |
| NOB1               | 0.264415035991921  | 2 | 0.876159157420242  |
| 0.0706869673396981 |                    |   |                    |
| WWP2               | 5.05017016174157   | 2 | 0.0800515016455081 |
| 0.829231054173494  |                    |   |                    |

|         |                     |   |                   |
|---------|---------------------|---|-------------------|
| PDPR    | 1.56695898889235    | 2 | 0.456813761852788 |
|         | 0.889084611636149   |   |                   |
| EXOSC6  | 0.462939633798602   | 2 | 0.79336664140697  |
|         | 0.156511701668397   |   |                   |
| AARS    | 0.00495808155566268 | 2 | 0.997524029506114 |
|         | 0.0161561943817229  |   |                   |
| DDX19B  | 4.56558704603894    | 2 | 0.101998872159432 |
|         | 0.391247939573725   |   |                   |
| DDX19A  | 0.108675889911193   | 2 | 0.947111980696133 |
|         | 0.10760743695732    |   |                   |
| ST3GAL2 | 0.775302744026771   | 2 | 0.67864889802584  |
|         | 0.235818853727732   |   |                   |
| COG4    | 1.49059463629247    | 2 | 0.47459317379862  |
|         | 0.265537530145262   |   |                   |
| SF3B3   | 2.75644792750542    | 2 | 0.252025762701745 |
|         | 0.447846067055438   |   |                   |
| VAC14   | 0.317715147290048   | 2 | 0.853117856783387 |
|         | 0.18523787428581    |   |                   |
| CMTR2   | 2.42776825563799    | 2 | 0.297041289540863 |
|         | 0.340271576174062   |   |                   |
| PHLPP2  | 1.21666705205243    | 2 | 0.544257104055222 |
|         | 0.801916442885267   |   |                   |
| AP1G1   | 0.936722815570421   | 2 | 0.6260272316529   |
|         | 0.290907802499482   |   |                   |
| ATXN1L  | 0.196154805830354   | 2 | 0.906578729201621 |
|         | 0.169933817114337   |   |                   |
| IST1    | 0.12079497443598    | 2 | 0.941390268607493 |
|         | 0.0517357550724369  |   |                   |
| ZNF821  | 3.87428979420814    | 2 | 0.144114825608148 |
|         | 0.311540076554044   |   |                   |
| DHODH   | 1.90777055868078    | 2 | 0.385241341773643 |
|         | 0.773809535871804   |   |                   |
| TXNL4B  | 0.468729789982239   | 2 | 0.791073104610655 |
|         | 0.306797619589922   |   |                   |
| DHX38   | 0.91971742424845    | 2 | 0.631372844533433 |
|         | 0.141229345289446   |   |                   |
| ZFHX3   | 1.59392535788177    | 2 | 0.450695795143949 |
|         | 1.72285051799483    |   |                   |
| PSMD7   | 0.466005508045063   | 2 | 0.792151391918528 |
|         | 0.0754238614611432  |   |                   |
| GLG1    | 2.99461047196699    | 2 | 0.223732254161281 |
|         | 0.284271823329974   |   |                   |
| RFWD3   | 0.505051582907456   | 2 | 0.776836176846626 |
|         | 0.190396001561997   |   |                   |
| MLKL    | 2.38459859904867    | 2 | 0.303522571818139 |
|         | 147.484153999174    |   |                   |
| WDR59   | 1.09328485408823    | 2 | 0.5788902171665   |
|         | 0.38605789885533    |   |                   |
| ZFP1    | 0.756621585340077   | 2 | 0.685017569139469 |
|         | 0.46576239324485    |   |                   |
| BCAR1   | 4.15271255309578    | 2 | 0.125386253682612 |
|         | 2.69394023479031    |   |                   |

|            |                    |   |                                   |
|------------|--------------------|---|-----------------------------------|
| CFDP1      | 0.894091025625082  | 2 | 0.639514801495163                 |
|            | 0.126138755425723  |   |                                   |
| TMEM170A   | 4.33973025627153   | 2 | 0.1141930172974 0.456583155242868 |
| GABARAPL2  | 1.21167554628421   | 2 | 0.545617131732921                 |
|            | 0.0883326695601783 |   |                                   |
| ADAT1      | 1.42174213821091   | 2 | 0.491216127855851                 |
|            | 0.254806922451154  |   |                                   |
| KARS       | 0.347898534765162  | 2 | 0.840339529200855                 |
|            | 0.0807067218555313 |   |                                   |
| TERF2IP    | 18.1395400839728   | 2 | 0.000115093002161504              |
|            | 0.316445002826233  |   |                                   |
| MON1B      | 2.07494088347571   | 2 | 0.354349897942968                 |
|            | 0.521854350664576  |   |                                   |
| SYCE1L     | 3.62297667877192   | 2 | 0.163410745074901                 |
|            | 1.04395209428366   |   |                                   |
| NUDT7      | 2.01015468332841   | 2 | 0.366016325397548                 |
|            | 0.522880344368852  |   |                                   |
| WWOX       | 0.903776397221377  | 2 | 0.636425318982575                 |
|            | 0.414476913515363  |   |                                   |
| CMC2       | 0.0266548117956872 | 2 | 0.986761010752096                 |
|            | 0.0305848287685704 |   |                                   |
| CENPN      | 9.06074716954497   | 2 | 0.0107766493285372                |
|            | 1.73504433995267   |   |                                   |
| ATMIN      | 2.10596204184124   | 2 | 0.348896130674677                 |
|            | 0.477172135185067  |   |                                   |
| GCSH       | 2.78774575275115   | 2 | 0.248112532321088                 |
|            | 0.403784116686915  |   |                                   |
| GAN        | 2.41829120507784   | 2 | 0.298452167300602                 |
|            | 1.08272397129405   |   |                                   |
| CMIP       | 0.827134282206707  | 2 | 0.66128713334212                  |
|            | 0.423816259158055  |   |                                   |
| AC099524.1 | 1.24296733127321   | 2 | 0.537146899704294                 |
|            | 0.426121179749258  |   |                                   |
| PLCG2      | 6.13179351825159   | 2 | 0.0466120233593919                |
|            | 0.287869942009354  |   |                                   |
| SDR42E1    | 0.914528797382112  | 2 | 0.633012950139458                 |
|            | 0.544972118150997  |   |                                   |
| MPH0SPH6   | 5.36570561309334   | 2 | 0.0683678354749165                |
|            | 0.483000106566515  |   |                                   |
| HSBP1      | 16.0032143983592   | 2 | 0.000334923905675133              |
|            | 0.346797996053934  |   |                                   |
| MLYCD      | 8.02858658619992   | 2 | 0.0180557101379282                |
|            | 0.971385397532547  |   |                                   |
| MBTPS1     | 0.432304387043403  | 2 | 0.805612683511425                 |
|            | 0.121999640547107  |   |                                   |
| AC040169.1 | 0.713240700037187  | 2 | 0.70003821678729                  |
|            | 0.530643940168141  |   |                                   |
| HSDL1      | 1.87957784684185   | 2 | 0.390710296448196                 |
|            | 0.353192610731569  |   |                                   |
| TAF1C      | 0.848353910376021  | 2 | 0.654308088453225                 |



|                               |   |                      |  |
|-------------------------------|---|----------------------|--|
| 0.404766995242679             |   |                      |  |
| TLDC1 1.92733168229578 2      |   | 0.381491831069825    |  |
| 0.458554039437185             |   |                      |  |
| COTL1 19.4066851338914 2      |   | 6.10789928399136e-05 |  |
| 0.236159836438859             |   |                      |  |
| KLHL36 1.03797217025068 2     |   | 0.595123646890889    |  |
| 0.275729266966927             |   |                      |  |
| USP10 2.1612468914986 2       |   | 0.339383872242057    |  |
| 0.235037054277873             |   |                      |  |
| ZDHC7 4.7695342722312 2       |   | 0.0921104262737596   |  |
| 0.888793310034635             |   |                      |  |
| GSE1 1.72012738700048 2       |   | 0.423135130501895    |  |
| 0.430871289339553             |   |                      |  |
| GINS2 7.68163518254818 2      |   | 0.0214760355459819   |  |
| 0.748051917105998             |   |                      |  |
| C16orf74 63.5525768963246 2   |   | 1.58761892521397e-14 |  |
| 1.11876603405559              |   |                      |  |
| AC018695.2 3.11346945085847 2 |   | 0.210823344628036    |  |
| 1.2461904446815               |   |                      |  |
| EMC8 4.01074495675409 2       |   | 0.134610146987347    |  |
| 0.26417844406503              |   |                      |  |
| COX4I1 59.6659507389465 2     |   | 1.10578213252666e-13 |  |
| 0.348670021658502             |   |                      |  |
| IRF8 81.3187752649304 2       | 0 | 0.502863883242274    |  |
| LINC02132 0.273744882886432   | 2 | 0.87208146049001     |  |
| 0.185403907894474             |   |                      |  |
| AC092723.3 0.0020872582350227 | 2 | 0.998956915273959    |  |
| 0.0466042056104942            |   |                      |  |
| MTHFSD 1.5155698697336 2      |   | 0.468703486759765    |  |
| 0.317136058250041             |   |                      |  |
| C16orf95 0.0983891761030183   | 2 | 0.95199586465356     |  |
| 0.174068436470474             |   |                      |  |
| FBX031 4.90802982475166 2     |   | 0.0859478198867716   |  |
| 0.959970899423979             |   |                      |  |
| MAP1LC3B 22.8008521201419 2   |   | 1.11907159094926e-05 |  |
| 0.333335778556602             |   |                      |  |
| KLHDC4 0.448930699076405      | 2 | 0.798943259973208    |  |
| 0.181260226758035             |   |                      |  |
| AC126696.1 1.52473354610282 2 |   | 0.466560875524217    |  |
| 0.922074991427521             |   |                      |  |
| SLC7A5 9.41956627007823 2     |   | 0.00900673061493928  |  |
| 1.43313945923422              |   |                      |  |
| BANP 1.71067675378217 2       |   | 0.425139309422732    |  |
| 0.306559069220691             |   |                      |  |
| ZC3H18 0.99690834206308 2     |   | 0.607468977429181    |  |
| 0.119882455031094             |   |                      |  |
| IL17C 10.7317192335256 2      |   | 0.00467344114501689  |  |
| 2.87381863312947              |   |                      |  |
| CYBA 154.163257343649 2       | 0 | 0.332861874300009    |  |
| MVD 22.1245615870629 2        |   | 1.56932355752648e-05 |  |

|                   |                    |   |                      |
|-------------------|--------------------|---|----------------------|
| 0.614776814977539 |                    |   |                      |
| SNAI3-AS1         | 0.352361613801665  | 2 | 0.838466369125386    |
|                   | 0.437183536193522  |   |                      |
| SNAI3             | 0.826142887285397  | 2 | 0.661615012952713    |
|                   | 0.592158448860405  |   |                      |
| RNF166            | 7.24267934620407   | 2 | 0.0267468204843681   |
|                   | 0.32967339639524   |   |                      |
| CTU2              | 1.55149529782411   | 2 | 0.460359465048083    |
|                   | 0.433110863907686  |   |                      |
| PIEZ01            | 0.966439899113823  | 2 | 0.616794144854013    |
|                   | 0.903069136218447  |   |                      |
| CDT1              | 10.5441361061376   | 2 | 0.00513298430503051  |
|                   | 1.22314911156442   |   |                      |
| APRT              | 3.73129461971815   | 2 | 0.154795976485649    |
|                   | 0.152038772824239  |   |                      |
| GALNS             | 0.486898616337642  | 2 | 0.783919213325506    |
|                   | 0.164838243271489  |   |                      |
| TRAPPC2L          | 0.0594108681503591 | 2 | 0.970731435841055    |
|                   | 0.0284007285295075 |   |                      |
| CBFA2T3           | 7.14453697614766   | 2 | 0.0280920548528169   |
|                   | 0.811779164223355  |   |                      |
| ACSF3             | 8.26365414691059   | 2 | 0.016053521049178    |
|                   | 0.456447217909242  |   |                      |
| AC009113.1        | 1.94357476251139   | 2 | 0.378406077360438    |
|                   | 1.08329605391961   |   |                      |
| ZNF778            | 0.0169611249496862 | 2 | 0.991555296056666    |
|                   | 0.126454996563879  |   |                      |
| ANKRD11           | 6.98701293764008   | 2 | 0.0303941091040386   |
|                   | 0.483742502229761  |   |                      |
| AC137932.3        | 0.102900893451891  | 2 | 0.949850717008918    |
|                   | 0.173412850901308  |   |                      |
| SPG7              | 0.828792613944077  | 2 | 0.660739043881691    |
|                   | 0.18094922146272   |   |                      |
| RPL13             | 26.2214763139331   | 2 | 2.02338611188235e-06 |
|                   | 0.128204624261883  |   |                      |
| CHMP1A            | 6.81797672063523   | 2 | 0.0330746430784712   |
|                   | 0.554375203459698  |   |                      |
| SPATA33           | 3.17319886352895   | 2 | 0.204620255113596    |
|                   | 0.883299426065963  |   |                      |
| CDK10             | 1.174913707913     | 2 | 0.555738814077348    |
|                   | 0.276017799426835  |   |                      |
| SPATA2L           | 6.28064764161291   | 2 | 0.043268784300514    |
|                   | 1.25315984028221   |   |                      |
| ZNF276            | 0.0665278556415334 | 2 | 0.967283232940877    |
|                   | 0.118887460875298  |   |                      |
| FANCA             | 8.83809388821205   | 2 | 0.012045707047909    |
|                   | 0.478409010127724  |   |                      |
| SPIRE2            | 4.40326986531296   | 2 | 0.110622150668301    |
|                   | 3.25718148680564   |   |                      |
| TCF25             | 5.85256154837803   | 2 | 0.0535960035569929   |



|                                  |   |                                   |  |
|----------------------------------|---|-----------------------------------|--|
| 0.282656740987069                |   |                                   |  |
| SMYD4 0.0991868635927825         | 2 | 0.951616242767729                 |  |
| 0.100736759790503                |   |                                   |  |
| RPA1 1.24176802352917 2          |   | 0.537469098516771                 |  |
| 0.0946431342902245               |   |                                   |  |
| SMG6 0.00356528601627945         | 2 | 0.998218944956176                 |  |
| 0.0207267117646175               |   |                                   |  |
| SRR 2.51969019633927 2           |   | 0.283697968430921                 |  |
| 0.84836684152085                 |   |                                   |  |
| TSR1 0.21327571402761 2          |   | 0.898851126687525                 |  |
| 0.138205704135461                |   |                                   |  |
| SGSM2 1.2328069890939 2          |   | 0.539882640988261                 |  |
| 0.744785076858258                |   |                                   |  |
| MNT 1.18029029041901 2           |   | 0.554246832623392                 |  |
| 0.76763769075353                 |   |                                   |  |
| METTL16 0.0221746985023506       | 2 | 0.988973888873752                 |  |
| 0.064481751244828                |   |                                   |  |
| PAFAH1B1 0.0117738716220566      | 2 | 0.994130358242624                 |  |
| 0.0140314395803371               |   |                                   |  |
| CLUH 0.00515848407535179         | 2 | 0.997424081349181                 |  |
| 0.0501347095256921               |   |                                   |  |
| OR3A3 1.29899188434069 2         |   | 0.522308984352581                 |  |
| 1.2452587673967                  |   |                                   |  |
| TRPV3 3.86049037103986 2         |   | 0.145112614609615                 |  |
| 1.59841483906503                 |   |                                   |  |
| TRPV1 0.873961560169247          | 2 | 0.645983847046185                 |  |
| 1.07686459170918                 |   |                                   |  |
| SHPK 0.0272971345488853          | 2 | 0.986444152111611                 |  |
| 0.123807770561221                |   |                                   |  |
| CTNS 1.55168687331838 2          |   | 0.460315370363953                 |  |
| 0.586983582281547                |   |                                   |  |
| TAX1BP3 0.134595540597101        | 2 | 0.934916769438904                 |  |
| 0.0836374278537787               |   |                                   |  |
| P2RX5-TAX1BP3 0.0589473897695031 | 2 | 0.970956418425754                 |  |
| 0.0909354509548284               |   |                                   |  |
| EMC6 1.20627701342873 2          |   | 0.547091887222573                 |  |
| 0.0953321503049118               |   |                                   |  |
| P2RX5 8.45868119160727 2         |   | 0.0145619896202972                |  |
| 0.168772411638983                |   |                                   |  |
| ITGAE 4.32563114806232 2         |   | 0.115000871310889                 |  |
| 0.186289511937892                |   |                                   |  |
| HASPIN 0.543683941948753         | 2 | 0.761974665689845                 |  |
| 0.596759392584939                |   |                                   |  |
| NCBP3 7.14739994191212 2         |   | 0.0280518703257615                |  |
| 0.527444179214122                |   |                                   |  |
| P2RX1 1.69586740505131 2         |   | 0.42829901141414 1.18334538726307 |  |
| ATP2A3 0.0130648043635661        | 2 | 0.993488887574375                 |  |
| 0.0299163867901192               |   |                                   |  |
| ZZEF1 4.82319066821201 2         |   | 0.0896721234028656                |  |
| 0.781857094431081                |   |                                   |  |

|            |                      |   |                      |
|------------|----------------------|---|----------------------|
| CYB5D2     | 0.654695823285436    | 2 | 0.720832913232866    |
|            | 0.251070332570169    |   |                      |
| ANKFY1     | 1.46296308014538     | 2 | 0.48119555123462     |
| UBE2G1     | 19.5861633335474     | 2 | 0.332514139855576    |
|            | 0.419915464548346    |   | 5.58365621898815e-05 |
| SPNS3      | 5.23374412738462     | 2 | 0.0730309420680858   |
|            | 0.758806267877839    |   |                      |
| MYBBP1A    | 0.907789970361323    | 2 | 0.635149429846429    |
|            | 0.49440227531639     |   |                      |
| PELP1      | 2.60934830786931     | 2 | 0.271260909946699    |
|            | 0.50381763484829     |   |                      |
| ARRB2      | 2.1405511949511      | 2 | 0.342913998162446    |
|            | 0.189115742446512    |   |                      |
| MED11      | 0.679283372503397    | 2 | 0.712025405551995    |
|            | 0.0651367789887546   |   |                      |
| CXCL16     | 3.35981183736656     | 2 | 0.186391511173329    |
|            | 3.19196107189408     |   |                      |
| PSMB6      | 0.319910044538314    | 2 | 0.852182117322146    |
|            | 0.0395989203488498   |   |                      |
| MINK1      | 0.190835293869774    | 2 | 0.90899321694893     |
|            | 0.357022427794629    |   |                      |
| SLC25A11   | 4.16592684679742     | 2 | 0.124560539104032    |
|            | 0.167458051489391    |   |                      |
| RNF167     | 0.0574280339950461   | 2 | 0.971694312791824    |
|            | 0.0430919542913281   |   |                      |
| PFN1       | 6.72918889797271     | 2 | 0.0345760356212941   |
|            | 0.113677519587871    |   |                      |
| SPAG7      | 1.5692774533903      | 2 | 0.456284515427303    |
|            | 0.122974524396832    |   |                      |
| CAMTA2     | 2.71440798794146     | 2 | 0.257379406211098    |
|            | 1.17921185874411     |   |                      |
| AC004771.4 | 0.000707452583645542 | 2 | 0.999646336261946    |
|            | 0.0235911657759148   |   |                      |
| KIF1C      | 0.0502631501539351   | 2 | 0.975181593993503    |
|            | 0.118848496426842    |   |                      |
| ZFP3       | 2.60145692999075     | 2 | 0.272333335456135    |
|            | 1.29387555404647     |   |                      |
| ZNF232     | 1.45003054800611     | 2 | 0.484317171436911    |
|            | 0.500681228741006    |   |                      |
| ZNF594     | 1.60773265364711     | 2 | 0.447595065559836    |
|            | 1.20147769829123     |   |                      |
| AC087500.1 | 0.0139196286019186   | 2 | 0.993064349116462    |
|            | 0.0613533065027535   |   |                      |
| SCIMP      | 14.7317073403941     | 2 | 0.000632485242154424 |
|            | 0.627296209279874    |   |                      |
| RABEP1     | 1.16682652254779     | 2 | 0.557990544952535    |
|            | 0.149820163046744    |   |                      |
| NUP88      | 11.9929564365829     | 2 | 0.00248749719071872  |
|            | 0.385641332910206    |   |                      |
| RPAIN      | 1.08365370761098     | 2 | 0.581684628350105    |

|                   |                      |   |                      |
|-------------------|----------------------|---|----------------------|
| 0.156204979487751 |                      |   |                      |
| AC004148.2        | 0.892302218386808    | 2 | 0.640087041716827    |
|                   | 0.216793746915435    |   |                      |
| C1QBP             | 3.01855489684969     | 2 | 0.221069654492238    |
|                   | 0.1566358853917      |   |                      |
| DHX33             | 3.49556908128848     | 2 | 0.174159359338224    |
|                   | 1.27776431075131     |   |                      |
| DERL2             | 4.76515940338478     | 2 | 0.092312132319874    |
|                   | 0.357599043214511    |   |                      |
| MIS12             | 0.980537735520547    | 2 | 0.612461700839285    |
|                   | 0.304413149494819    |   |                      |
| NLRP1             | 1.73961358611056     | 2 | 0.419032501416463    |
|                   | 0.3556764603431      |   |                      |
| KIAA0753          | 0.000604033596713398 | 2 | 0.999698028804126    |
|                   | 0.0217364282612746   |   |                      |
| TXNDC17           | 10.918875045978      | 2 | 0.00425594894513359  |
|                   | 0.227752863564945    |   |                      |
| MED31             | 0.00260312073358782  | 2 | 0.998699286295533    |
|                   | 0.0101659857298156   |   |                      |
| C17orf100         | 0.953601344273484    | 2 | 0.620766252973027    |
|                   | 0.483355226138016    |   |                      |
| XAF1              | 3.91744536578941     | 2 | 0.141038456748455    |
|                   | 1.9051297281979      |   |                      |
| ALOX12-AS1        | 2.05659726217125     | 2 | 0.357614878113438    |
|                   | 0.530469086253398    |   |                      |
| RNASEK            | 1.06563633187366     | 2 | 0.58694851837618     |
|                   | 0.43922689664177     |   |                      |
| C17orf49          | 2.60109576894441     | 2 | 0.272382517992899    |
|                   | 0.84439791804191     |   |                      |
| ACADVL            | 30.1410656224066     | 2 | 2.85069504446511e-07 |
|                   | 0.708872214372541    |   |                      |
| DVL2              | 10.5920320154029     | 2 | 0.00501152004502725  |
|                   | 0.805277039960655    |   |                      |
| PHF23             | 1.70875241630378     | 2 | 0.425548562029521    |
|                   | 0.258176163132113    |   |                      |
| GABARAP           | 0.538509548416553    | 2 | 0.763948596453355    |
|                   | 0.10924449783528     |   |                      |
| CTDNEP1           | 0.190629224943074    | 2 | 0.909086879402375    |
|                   | 0.0685126583533905   |   |                      |
| ELP5              | 2.71550416825932     | 2 | 0.25723837774313     |
|                   | 0.219586273778296    |   |                      |
| EIF5A             | 0.214298181674326    | 2 | 0.89839172103126     |
|                   | 0.0595697167289417   |   |                      |
| GPS2              | 0.0131418073957152   | 2 | 0.993450637482348    |
|                   | 0.0314369298148768   |   |                      |
| ACAP1             | 0.0508453272135255   | 2 | 0.974897771127819    |
|                   | 0.0263538340403714   |   |                      |
| KCTD11            | 0.443187345487343    | 2 | 0.801240864202457    |
|                   | 0.407086583001683    |   |                      |
| TMEM256           | 0.594256713800172    | 2 | 0.742948643656632    |
|                   | 0.044236028836891    |   |                      |
| TMEM102           | 0.817717781648394    | 2 | 0.664407979770171    |

|                               |   |                                    |
|-------------------------------|---|------------------------------------|
| 0.308367896393807             |   |                                    |
| CHRN1 0.968609393077321       | 2 | 0.616125442019284                  |
| 0.144718144931654             |   |                                    |
| ZBTB4 3.2376418228598 2       |   | 0.198132176796144                  |
| 2.38953523658692              |   |                                    |
| POLR2A 0.03549455873261 2     |   | 0.982409276083623                  |
| 0.0546925523389256            |   |                                    |
| SENP3 1.85694064208942 2      |   | 0.395157712726157                  |
| 0.870437279669584             |   |                                    |
| EIF4A1 0.239895635266368      | 2 | 0.886966719532286                  |
| 0.0510677113809776            |   |                                    |
| CD68 0.403208812402964        | 2 | 0.817418229572375                  |
| 0.377228005502391             |   |                                    |
| AC016876.1 2.27850102975419 2 |   | 0.320058811263264                  |
| 0.722489704207821             |   |                                    |
| MPDU1 3.02711379715316 2      |   | 0.220125619342191                  |
| 0.337548356409346             |   |                                    |
| FXR2 0.327198466543179        | 2 | 0.8490822376126                    |
| 0.229430692459511             |   |                                    |
| SAT2 8.52923591061131 2       |   | 0.0140572365999527                 |
| 0.248215856503628             |   |                                    |
| TP53 1.44414048148325 2       |   | 0.485745603974116                  |
| 0.15512807210555              |   |                                    |
| WRAP53 1.02701485391398 2     |   | 0.598393073778428                  |
| 0.407503126770424             |   |                                    |
| KDM6B 0.435176206216332       | 2 | 0.804456726659573                  |
| 0.286972758598397             |   |                                    |
| NAA38 3.34017299779974 2      |   | 0.188230783178883                  |
| 0.158427125468843             |   |                                    |
| CHD3 0.746716236439835        | 2 | 0.688418653431576                  |
| 0.19182727202542              |   |                                    |
| TRAPPC1 11.0561947602429 2    |   | 0.00397354204169054                |
| 0.214983485970917             |   |                                    |
| CNTR0B 3.52874470590339 2     |   | 0.171294265091974                  |
| 0.611137161940648             |   |                                    |
| PER1 1.94474099040577 2       |   | 0.378185487819697                  |
| 1.89044170143046              |   |                                    |
| VAMP2 2.28094102252562 2      |   | 0.31966857875983 0.121021290302045 |
| TMEM107 1.78452562725384 2    |   | 0.409727565872056                  |
| 0.443936012697554             |   |                                    |
| BORCS6 0.0860838533349859     | 2 | 0.95787122887661                   |
| 0.0662552306038166            |   |                                    |
| AURKB 5.17119427658853 2      |   | 0.0753510711542313                 |
| 0.564664117699756             |   |                                    |
| LINC00324 4.27256912367399 2  |   | 0.118092795404294                  |
| 0.555666748979225             |   |                                    |
| CTC1 1.87305575262811 2       |   | 0.391986500880463                  |
| 1.33694619041378              |   |                                    |
| PFAS 0.00547977163086014      | 2 | 0.997263864246016                  |
| 0.0533617183888301            |   |                                    |

|          |                      |   |                      |
|----------|----------------------|---|----------------------|
| SLC25A35 | 5.01403664711031     | 2 | 0.0815109164482152   |
|          | 3.24223013240657     |   |                      |
| RANGRF   | 0.581020074921885    | 2 | 0.74788202243787     |
|          | 0.112802131791839    |   |                      |
| KRBA2    | 1.10190925933704     | 2 | 0.576399299782933    |
|          | 1.12749969960205     |   |                      |
| RPL26    | 44.6349896060471     | 2 | 2.03065009252157e-10 |
|          | 0.183642181702522    |   |                      |
| NDEL1    | 6.10182949402338     | 2 | 0.0473156227646134   |
|          | 0.812069777611618    |   |                      |
| MYH10    | 2.96183883423431     | 2 | 0.22742849058136     |
| STX8     | 1.57433287044958     | 2 | 1.0716899999076      |
|          | 0.236798055797742    |   | 0.455132617610002    |
| GAS7     | 0.792897660317234    | 2 | 0.672704698013256    |
|          | 0.761165513082845    |   |                      |
| MYH3     | 1.33591097594114     | 2 | 0.512755842337076    |
|          | 1.27324736085153     |   |                      |
| SC01     | 0.000247156127195131 | 2 | 0.999876429571857    |
|          | 0.00179955406385421  |   |                      |
| ADPRM    | 2.99069093737429     | 2 | 0.224171147239804    |
|          | 0.562800471348181    |   |                      |
| ZNF18    | 2.20417114191811     | 2 | 0.332177580858873    |
|          | 1.31057740748873     |   |                      |
| MAP2K4   | 0.130914197872462    | 2 | 0.936639228716977    |
|          | 0.148711317042067    |   |                      |
| ARHGAP44 | 0.023410667576628    | 2 | 0.98836290711088     |
|          | 0.0586963533224304   |   |                      |
| ELAC2    | 3.96168859050876     | 2 | 0.137952715305465    |
|          | 0.381256090189619    |   |                      |
| COX10    | 0.00118897764436086  | 2 | 0.999405687851288    |
|          | 0.0167176225960877   |   |                      |
| TVP23C   | 3.10545028806798     | 2 | 0.211670354931954    |
|          | 1.56571628324876     |   |                      |
| AC005838 | 2.0410017086744221   | 2 | 0.814640356605982    |
|          | 0.633988411537919    |   |                      |
| TRIM16   | 0.522802008444143    | 2 | 0.76997209563813     |
|          | 0.473253815618169    |   |                      |
| ZNF286A  | 0.83205517695366     | 2 | 0.659662071161578    |
|          | 0.830061778590213    |   |                      |
| ZSWIM7   | 2.29662268231796     | 2 | 0.317171912569031    |
|          | 0.299357184102389    |   |                      |
| TTC19    | 0.62999701059184     | 2 | 0.72978996508828     |
| NCOR1    | 2.1487171100789      | 2 | 0.113593844837451    |
|          | 0.151214576979632    |   | 0.341516749254954    |
| PIGL     | 0.237539144737152    | 2 | 0.888012399782368    |
|          | 0.295398531892937    |   |                      |
| CENPV    | 2.40295649851335     | 2 | 0.300749300718168    |
|          | 1.18753591727988     |   |                      |
| UBB      | 39.6424792557454     | 2 | 2.46459186392656e-09 |
|          | 0.39294571450044     |   |                      |



|            |                    |   |                     |
|------------|--------------------|---|---------------------|
| TRPV2      | 6.22441351914045   | 2 | 0.0445026402739906  |
|            | 0.637199343612833  |   |                     |
| LRR75A     | 0.987201990137064  | 2 | 0.610424296810577   |
|            | 0.325769971492729  |   |                     |
| ZNF287     | 0.659216814727846  | 2 | 0.71920531380064    |
|            | 0.394944467582614  |   |                     |
| CCDC144A   | 14.5777428282953   | 2 | 0.00068309855324955 |
|            | 0.696926799230995  |   |                     |
| AC098850.3 | 6.26151080261339   | 2 | 0.0436847852418083  |
|            | 1.42441353255909   |   |                     |
| TNFRSF13B  | 0.866629654252353  | 2 | 0.648356339507216   |
|            | 0.465170700627432  |   |                     |
| AC104024.1 | 0.83501395983676   | 2 | 0.65868689425123    |
|            | 0.95888873028789   |   |                     |
| MPRIP      | 1.58699507658152   | 2 | 0.452260228389788   |
|            | 0.524381425655546  |   |                     |
| FLCN       | 4.72878054994482   | 2 | 0.0940066010753008  |
|            | 0.8208226618661    |   |                     |
| COP3       | 6.09695459494534   | 2 | 0.0474310928766262  |
|            | 0.349442098617452  |   |                     |
| MED9       | 4.26223265592246   | 2 | 0.118704706477711   |
|            | 1.44022982150398   |   |                     |
| PENT       | 2.28372610215664   | 2 | 0.319223737337721   |
|            | 0.746029936101498  |   |                     |
| RAI1       | 0.500807055886238  | 2 | 0.77848657859272    |
|            | 0.669701907296135  |   |                     |
| SMCR5      | 0.441140833369072  | 2 | 0.802061158385501   |
|            | 0.177261400989419  |   |                     |
| SREBF1     | 2.1959617498426    | 2 | 0.333543871043477   |
|            | 1.75423513361842   |   |                     |
| TOM1L2     | 0.061105973620215  | 2 | 0.969909038319592   |
|            | 0.140152275925658  |   |                     |
| ATPAF2     | 0.0356692561551787 | 2 | 0.982323467647086   |
|            | 0.0411914229029395 |   |                     |
| GID4       | 0.0302273011457915 | 2 | 0.984999987428595   |
|            | 0.093765358894271  |   |                     |
| DRG2       | 1.42417619974706   | 2 | 0.490618666352736   |
|            | 0.212097745015964  |   |                     |
| ALKBH5     | 1.63921039819923   | 2 | 0.440605571648819   |
|            | 0.193885763602386  |   |                     |
| LLGL1      | 0.568051320237367  | 2 | 0.752747328872576   |
|            | 0.490930803726433  |   |                     |
| FLII       | 0.857311685203335  | 2 | 0.651384069255678   |
|            | 0.103422006004481  |   |                     |
| MIEF2      | 0.0159331751375657 | 2 | 0.992065061588934   |
|            | 0.0561914115511809 |   |                     |
| TOP3A      | 0.273782585864068  | 2 | 0.872065020611067   |
|            | 0.337753703598674  |   |                     |
| SMCR8      | 0.728950101304385  | 2 | 0.694561164624363   |
|            | 0.536339335413376  |   |                     |

|            |                    |   |                      |
|------------|--------------------|---|----------------------|
| SHMT1      | 5.65462185139821   | 2 | 0.0591717571735831   |
|            | 0.406179971824771  |   |                      |
| TRIM16L    | 2.36822097403575   | 2 | 0.30601826568877     |
| TVP23B     | 2.90393617691948   | 2 | 1.55531975543961     |
|            | 1.01659811840398   |   | 0.234109087007937    |
| PRPSAP2    | 30.65122065504     | 2 | 2.20887938939818e-07 |
|            | 0.646293398670873  |   |                      |
| FAM83G     | 0.735619455412931  | 2 | 0.692248884941628    |
|            | 0.892088585171649  |   |                      |
| GRAP       | 0.953448254233058  | 2 | 0.620813771357033    |
|            | 0.197971963687574  |   |                      |
| AC007952.4 | 4.45394178895931   | 2 | 0.107854638908083    |
|            | 0.457164822550027  |   |                      |
| GRAPL      | 2.26325952592102   | 2 | 0.322507217561683    |
|            | 1.63300892873424   |   |                      |
| AC007952.5 | 6.20291112558029   | 2 | 0.0449836781497223   |
|            | 2.8870717903931    |   |                      |
| EPN2       | 11.1082522075401   | 2 | 0.00387145023748148  |
|            | 3.38857476323324   |   |                      |
| MAPK7      | 0.33059901040576   | 2 | 0.847639793537716    |
|            | 0.235623248372838  |   |                      |
| ALDH3A2    | 0.77252764391629   | 2 | 0.679591210943769    |
|            | 0.518980903441348  |   |                      |
| AKAP10     | 4.35897704068949   | 2 | 0.113099363872571    |
|            | 0.275584607921027  |   |                      |
| SPECC1     | 1.22380576328101   | 2 | 0.542317919783195    |
|            | 0.567849953543141  |   |                      |
| AC107926.1 | 1.10177398379192   | 2 | 0.576438287466181    |
|            | 0.895496395388521  |   |                      |
| USP22      | 0.180538755476749  | 2 | 0.913685025711951    |
|            | 0.0806372536502131 |   |                      |
| DHRS7B     | 1.61384187779881   | 2 | 0.446229922320469    |
|            | 0.356865412756397  |   |                      |
| TMEM11     | 1.30779530551858   | 2 | 0.520014983832511    |
|            | 0.160739906653271  |   |                      |
| MAP2K3     | 0.728840591246051  | 2 | 0.694599196382396    |
|            | 0.119509414466241  |   |                      |
| MTRNR2L1   | 0.0122552907308689 | 2 | 0.993891090365257    |
|            | 0.0720621082529412 |   |                      |
| WSB1       | 0.210554300745471  | 2 | 0.900075031884065    |
|            | 0.0670074613097611 |   |                      |
| LGALS9     | 30.0501238326164   | 2 | 2.98331093162574e-07 |
|            | 1.95111872694195   |   |                      |
| LYRM9      | 4.83816245810795   | 2 | 0.0890033536006276   |
|            | 0.941450755403373  |   |                      |
| NLK        | 12.2068242632667   | 2 | 0.00223522780120655  |
|            | 0.95141018269642   |   |                      |
| TMEM97     | 0.545433457948371  | 2 | 0.761308413702494    |
|            | 0.250518192989629  |   |                      |
| IFT20      | 0.732243563785854  | 2 | 0.693418350268276    |

|                              |                   |                      |                   |
|------------------------------|-------------------|----------------------|-------------------|
| 0.149754323443128            |                   |                      |                   |
| TNFAIP1 1.94310053834431 2   |                   | 0.378495812652105    |                   |
| 0.592098222808628            |                   |                      |                   |
| POLDIP2 1.59243489909481 2   |                   | 0.451031792079853    |                   |
| 0.204348392780092            |                   |                      |                   |
| TMEM199 12.2066252115669 2   |                   | 0.00223545027522387  |                   |
| 0.362740560677523            |                   |                      |                   |
| AC005726.1                   | 0.288766110135455 | 2                    | 0.865556128887485 |
|                              | 0.443495656821006 |                      |                   |
| UNC119 9.54219053105703 2    |                   | 0.00847109697659876  |                   |
| 0.535492326624914            |                   |                      |                   |
| PIGS 5.37983476245677 2      |                   | 0.0678865478432678   |                   |
| 0.691343529073978            |                   |                      |                   |
| ALDOC 20.8444897148444 2     |                   | 2.97629907498598e-05 |                   |
| 1.87436014802245             |                   |                      |                   |
| SPAG5 1.87693368742306 2     |                   | 0.391227188214151    |                   |
| 2.33186542854018             |                   |                      |                   |
| AC005726.5                   | 0.623317429025531 | 2                    | 0.732231385534732 |
|                              | 0.258788180880153 |                      |                   |
| SGK494 2.80834337872305 2    |                   | 0.245570380792349    |                   |
| 0.904143172214724            |                   |                      |                   |
| KIAA0100 0.00135684276094502 | 2                 | 0.99932180869528     |                   |
| 0.0142263079077119           |                   |                      |                   |
| SDF2 3.06896147083444 2      |                   | 0.215567598731627    |                   |
| 0.358616852917077            |                   |                      |                   |
| SUPT6H 0.0155753063187631    | 2                 | 0.992242592047497    |                   |
| 0.0362321294506582           |                   |                      |                   |
| PROCA1 0.664141780479121     | 2                 | 0.717436461809042    |                   |
| 0.424541864813094            |                   |                      |                   |
| RAB34 0.346818349920156      | 2                 | 0.840793512798421    |                   |
| 0.26155443942571             |                   |                      |                   |
| RPL23A 77.2940625687167 2    | 0                 | 0.257335798717091    |                   |
| TLCD1 4.8276082830184 2      |                   | 0.0894742735393943   |                   |
| 2.28591613817149             |                   |                      |                   |
| NEK8 0.35244073532991 2      |                   | 0.838433199411246    |                   |
| 0.118094276438082            |                   |                      |                   |
| TRAF4 19.9913789159555 2     |                   | 4.55960504570641e-05 |                   |
| 0.655105506920052            |                   |                      |                   |
| FAM222B 0.301428123992609    | 2                 | 0.8600935969478      |                   |
| 0.0959712098885543           |                   |                      |                   |
| ERAL1 0.284697499098174      | 2                 | 0.867318726720562    |                   |
| 0.104381165637257            |                   |                      |                   |
| FLOT2 0.00396857907078779    | 2                 | 0.998017677865573    |                   |
| 0.014452087878268            |                   |                      |                   |
| DHRS13 3.43933472813096 2    |                   | 0.179125721654579    |                   |
| 1.05417580362851             |                   |                      |                   |
| PHF12 0.402260954088764      | 2                 | 0.817805719719101    |                   |
| 0.267951238470956            |                   |                      |                   |
| SEZ6 6.41016845565707 2      |                   | 0.0405554855935243   |                   |
| 1.61569135516221             |                   |                      |                   |

|            |                    |   |                      |
|------------|--------------------|---|----------------------|
| MY018A     | 2.66765379604961   | 2 | 0.263467067977235    |
|            | 2.02701797375629   |   |                      |
| NUFIP2     | 3.09881532450526   | 2 | 0.212373733555884    |
|            | 0.413259902483577  |   |                      |
| TAOK1      | 0.274593276895706  | 2 | 0.871711604598097    |
|            | 0.167726421612171  |   |                      |
| ABHD15     | 0.203096542483808  | 2 | 0.903437568236246    |
|            | 0.226663433593474  |   |                      |
| TP53I13    | 0.496286872036865  | 2 | 0.780248019581963    |
|            | 0.215872447047129  |   |                      |
| GIT1       | 4.00148807346243   | 2 | 0.13523462626574     |
| SSH2       | 0.232836405701424  | 2 | 1.24096415840376     |
|            | 0.0984464146843355 |   | 0.890102901878967    |
| EFCAB5     | 0.140008875461953  | 2 | 0.932389682202192    |
|            | 0.443430364448205  |   |                      |
| NSRP1      | 29.42934768014     | 2 | 4.06909986261361e-07 |
|            | 0.328352162993454  |   |                      |
| AC104984.3 | 4.2602843737652    | 2 | 0.118820397949277    |
|            | 0.340356076938496  |   |                      |
| SLC6A4     | 5.09616067319814   | 2 | 0.0782317004794333   |
|            | 1.98927129749976   |   |                      |
| BLMH       | 0.122130671642706  | 2 | 0.940761772324926    |
|            | 0.0716836489896048 |   |                      |
| CPD        | 0.380321443799652  | 2 | 0.826826234180514    |
|            | 0.453872881443068  |   |                      |
| GOSR1      | 0.596003451909466  | 2 | 0.742300058570369    |
|            | 0.155308386124795  |   |                      |
| CRLF3      | 0.0629609765668152 | 2 | 0.969009863315115    |
|            | 0.0465946588636745 |   |                      |
| AC127024.5 | 1.93547325059841   | 2 | 0.379942016789955    |
|            | 1.78930333311233   |   |                      |
| ATAD5      | 0.159241584107211  | 2 | 0.923466465820473    |
|            | 0.184794129623547  |   |                      |
| TEFM       | 0.0101900957082286 | 2 | 0.994917909886094    |
|            | 0.0253886174813396 |   |                      |
| ADAP2      | 4.81895153343831   | 2 | 0.0898623910824919   |
|            | 2.00312151876463   |   |                      |
| RNF135     | 6.05915509750272   | 2 | 0.0483360534396566   |
|            | 1.09607311894495   |   |                      |
| NF1        | 3.63347920840397   | 2 | 0.1625548811296      |
| EVI2B      | 1.81628600556799   | 2 | 0.58929048668268     |
|            | 0.138784509774596  |   | 0.403272404866899    |
| EVI2A      | 5.75680909161136   | 2 | 0.0562243947597474   |
|            | 0.344317573578235  |   |                      |
| RAB11FIP4  | 4.98369525751048   | 2 | 0.0827569211659199   |
|            | 0.296858728105255  |   |                      |
| COPRS      | 3.17303487509292   | 2 | 0.204637033479259    |
|            | 0.339339052160151  |   |                      |
| UTP6       | 4.10200052679437   | 2 | 0.128606199155703    |
|            | 0.27001480304849   |   |                      |

|           |                     |   |                      |
|-----------|---------------------|---|----------------------|
| SUZ12     | 2.05566156216327    | 2 | 0.357782227379716    |
|           | 0.252870235917333   |   |                      |
| LRRRC37B  | 2.02922087694103    | 2 | 0.362543635379684    |
|           | 0.60703166774704    |   |                      |
| RHOT1     | 0.508175228104122   | 2 | 0.775623843521652    |
|           | 0.245850766176206   |   |                      |
| C17orf75  | 5.23922767628238    | 2 | 0.0728309819451876   |
|           | 0.700804192281518   |   |                      |
| ZNF207    | 4.49333220281336    | 2 | 0.105751201289712    |
|           | 0.221266316077748   |   |                      |
| PSMD11    | 9.3570389866947     | 2 | 0.00929276170321003  |
|           | 0.226200804626189   |   |                      |
| CDK5R1    | 0.837725902859549   | 2 | 0.657794338864294    |
|           | 0.668636929824039   |   |                      |
| MYO1D     | 1.19179715079885    | 2 | 0.551067167924434    |
|           | 0.468178841984954   |   |                      |
| CCT6B     | 0.499081077800985   | 2 | 0.779158693952259    |
|           | 0.495501981603001   |   |                      |
| ZNF830    | 0.513028581329555   | 2 | 0.773743937165234    |
|           | 0.157129362341351   |   |                      |
| LIG3      | 1.48036837254043    | 2 | 0.477026045780916    |
|           | 0.750239213072441   |   |                      |
| RFFL      | 0.00719451940008919 | 2 | 0.996409202687346    |
|           | 0.0570399990283168  |   |                      |
| RAD51D    | 0.46571258271197    | 2 | 0.792267421020456    |
|           | 0.34583985891201    |   |                      |
| NLE1      | 1.36238279536533    | 2 | 0.506013769465423    |
|           | 0.647948166267933   |   |                      |
| SLFN5     | 0.00365877102968742 | 2 | 0.998172286790918    |
|           | 0.041956613360854   |   |                      |
| SLFN11    | 1.87928431664882    | 2 | 0.390767643290718    |
|           | 1.21863726860973    |   |                      |
| SLFN13    | 0.486005119986847   | 2 | 0.784269506044209    |
|           | 0.198629905132285   |   |                      |
| LINC02001 | 1.9557033230699     | 2 | 0.37611826083955     |
|           | 0.274928636648959   |   |                      |
| PEX12     | 1.27162000220097    | 2 | 0.529506413787725    |
|           | 1.229151565698      |   |                      |
| AP2B1     | 7.10266033673555    | 2 | 0.0286864564478723   |
|           | 0.548394011308714   |   |                      |
| TAF15     | 0.572301516815563   | 2 | 0.751149365328036    |
|           | 0.112178604870806   |   |                      |
| CCL3      | 15.7204728284218    | 2 | 0.000385782656087907 |
|           | 2.05711224972671    |   |                      |
| CCL4      | 1.32573481678017    | 2 | 0.515371433393146    |
|           | 0.640417950754519   |   |                      |
| CCL3L1    | 4.46556669673397    | 2 | 0.107229557182094    |
|           | 8.92728836516489    |   |                      |
| CCL4L2    | 0.406214267900756   | 2 | 0.816190794997323    |
|           | 0.274250701479526   |   |                      |

|            |                     |   |                     |                  |
|------------|---------------------|---|---------------------|------------------|
| ZNHIT3     | 2.70725554365366    | 2 | 0.258301499966277   |                  |
|            | 0.208182075162096   |   |                     |                  |
| MY019      | 0.0606240786829228  | 2 | 0.970142763603819   |                  |
|            | 0.175609923620009   |   |                     |                  |
| PIGW       | 0.223216372514928   | 2 | 0.894394624961792   |                  |
|            | 0.299981105617463   |   |                     |                  |
| GGNBP2     | 9.39784299151457    | 2 | 0.00910509168822393 |                  |
|            | 0.278834815769469   |   |                     |                  |
| MRM1       | 0.0224706170009775  | 2 | 0.988827571864308   |                  |
|            | 0.0917955734972908  |   |                     |                  |
| AATF       | 0.926572417131993   | 2 | 0.629212520721362   |                  |
|            | 0.143112385343754   |   |                     |                  |
| ACACA      | 0.00172978859211346 | 2 | 0.999135479617209   |                  |
|            | 0.0367678213841212  |   |                     |                  |
| TADA2A     | 6.08614011550817    | 2 | 0.0476882588182821  |                  |
|            | 1.71057341087762    |   |                     |                  |
| DUSP14     | 0.00622103412412238 | 2 | 0.996894315584161   |                  |
|            | 0.0231985880355529  |   |                     |                  |
| SYNRG      | 0.69601096789903    | 2 | 0.706095004014412   |                  |
|            | 0.147138461456273   |   |                     |                  |
| DDX52      | 3.4124542551836     | 2 | 0.181549465069158   |                  |
|            | 0.352364198546613   |   |                     |                  |
| MRPL45     | 6.15982709430618    | 2 | 0.0459632301293802  |                  |
|            | 0.443035753703036   |   |                     |                  |
| SOCS7      | 1.06563944403028    | 2 | 0.586947605039032   |                  |
|            | 0.717532817832126   |   |                     |                  |
| EPOP       | 1.3471615859692     | 2 | 0.5098795319726     | 1.25535416135699 |
| AC006449.6 | 0.594138409046173   | 2 | 0.742992592134708   |                  |
|            | 0.452043845417429   |   |                     |                  |
| MLLT6      | 0.568288726372912   | 2 | 0.752657980758434   |                  |
|            | 0.376020586716807   |   |                     |                  |
| CISD3      | 3.86276603487668    | 2 | 0.144947594745186   |                  |
|            | 0.778047111780354   |   |                     |                  |
| PSMB3      | 2.33825382968467    | 2 | 0.310638036362665   |                  |
|            | 0.0933893905517048  |   |                     |                  |
| PIP4K2B    | 2.81664443708063    | 2 | 0.244553246045319   |                  |
|            | 1.78161502861046    |   |                     |                  |
| CWC25      | 7.58028181388609    | 2 | 0.0225924181982434  |                  |
|            | 0.512705594007693   |   |                     |                  |
| RPL23      | 5.47263909399051    | 2 | 0.0648084328838048  |                  |
|            | 0.0685962864189313  |   |                     |                  |
| LASP1      | 0.594265229745843   | 2 | 0.742945480208224   |                  |
|            | 0.110568316548087   |   |                     |                  |
| LINC00672  | 0.0368020806738298  | 2 | 0.981767225138547   |                  |
|            | 0.127388682120645   |   |                     |                  |
| CACNB1     | 0.542212739643591   | 2 | 0.762535381338419   |                  |
|            | 0.699306531886238   |   |                     |                  |
| RPL19      | 100.161347416425    | 0 | 0.307105420628832   |                  |
| FBXL20     | 0.184448309124982   | 2 | 0.91190071992712    |                  |
|            | 0.160849675973613   |   |                     |                  |

|            |                      |   |                    |
|------------|----------------------|---|--------------------|
| MED1       | 1.9922411464188      | 2 | 0.369309374398501  |
|            | 0.471966805053373    |   |                    |
| CDK12      | 1.0736708101467      | 2 | 0.584595335630625  |
|            | 0.160078304917438    |   |                    |
| AC009283.1 | 0.732123764978308    | 2 | 0.693459886858019  |
|            | 0.825358861045334    |   |                    |
| STARD3     | 0.270344962860441    | 2 | 0.873565224913689  |
|            | 0.127909064350024    |   |                    |
| MIEN1      | 0.468771819233482    | 2 | 0.791056480680196  |
|            | 0.0762615498940769   |   |                    |
| IKZF3      | 2.06094699328046     | 2 | 0.356837958986777  |
|            | 0.192471780474275    |   |                    |
| ZBPB2      | 0.435320225256524    | 2 | 0.804398800202401  |
|            | 0.367792734611732    |   |                    |
| GSDMB      | 1.98981485387428     | 2 | 0.369757672560004  |
|            | 1.48254573081887     |   |                    |
| ORMDL3     | 3.77296260226262     | 2 | 0.151604321365401  |
|            | 0.493917969352932    |   |                    |
| PSMD3      | 0.266659337922365    | 2 | 0.875176526009561  |
|            | 0.0641245629453748   |   |                    |
| MED24      | 5.77447673126904     | 2 | 0.0557299059148082 |
|            | 0.514801723081855    |   |                    |
| NR1D1      | 0.176768370135941    | 2 | 0.915409122642316  |
|            | 0.364321016186708    |   |                    |
| MSL1       | 0.300550670628057    | 2 | 0.860471025746024  |
|            | 0.0932898161253599   |   |                    |
| CASC3      | 0.141236337152326    | 2 | 0.93181762145811   |
|            | 0.105836654493145    |   |                    |
| WIPF2      | 0.615575460311844    | 2 | 0.735071334927291  |
|            | 0.255445743444676    |   |                    |
| RARA       | 0.000418429762804956 | 2 | 0.999790807002505  |
|            | 0.00696113753043849  |   |                    |
| TOP2A      | 2.29195428405254     | 2 | 0.31791311969825   |
|            | 0.640910304325085    |   |                    |
| CCR7       | 1.55092973482967     | 2 | 0.460489664595014  |
|            | 0.491790345928033    |   |                    |
| SMARCE1    | 0.220075248652794    | 2 | 0.895800430774683  |
|            | 0.0936780645567824   |   |                    |
| AC073508.3 | 0.324654450646675    | 2 | 0.850162964168228  |
|            | 0.56981720664035     |   |                    |
| KRT10      | 1.05478489998319     | 2 | 0.590141789368307  |
|            | 0.0904560928757038   |   |                    |
| TMEM99     | 0.212006698660462    | 2 | 0.899421635610805  |
|            | 0.253833864320866    |   |                    |
| EIF1       | 0.0746830562161466   | 2 | 0.963347069057645  |
|            | 0.00994642355121611  |   |                    |
| JUP        | 0.00865044275024818  | 2 | 0.995684118923709  |
|            | 0.0330074454997886   |   |                    |
| NT5C3B     | 3.11809083703579     | 2 | 0.210336758974232  |
|            | 0.208842130594235    |   |                    |
| ACLY       | 1.36728790411072     | 2 | 0.504774263781323  |

|                               |   |  |                                    |
|-------------------------------|---|--|------------------------------------|
| 0.35924527441947              |   |  |                                    |
| CNP 0.123975266561745         | 2 |  | 0.939894510130634                  |
| 0.0641635669489767            |   |  |                                    |
| DNAJC7 1.05822083491526 2     |   |  | 0.589128815351169                  |
| 0.0466137021095335            |   |  |                                    |
| NKIRAS2 0.295702846393344     | 2 |  | 0.862559261719778                  |
| 0.128291951731408             |   |  |                                    |
| DHX58 2.43377752178752 2      |   |  | 0.296150128933492                  |
| 1.66111422551172              |   |  |                                    |
| KAT2A 2.65751824428976 2      |   |  | 0.264805648978916                  |
| 0.546845538580701             |   |  |                                    |
| RAB5C 0.78581590351838 2      |   |  | 0.675090885654651                  |
| 0.0932932948237746            |   |  |                                    |
| GHDC 0.510374534880015        | 2 |  | 0.77477139491925                   |
| 0.276716354159199             |   |  |                                    |
| STAT5B 1.91132616639667 2     |   |  | 0.384557066663687                  |
| 0.433939009219006             |   |  |                                    |
| STAT5A 1.46695329821533 2     |   |  | 0.480236470696017                  |
| 0.208919198057011             |   |  |                                    |
| STAT3 10.0504040566535 2      |   |  | 0.00657025898240815                |
| 0.48941347093116              |   |  |                                    |
| ATP6V0A1 22.2377664330802 2   |   |  | 1.48296320021668e-05               |
| 1.51285848541842              |   |  |                                    |
| NAGLU 3.43490897767091 2      |   |  | 0.17952254342369 0.992104155835312 |
| HSD17B1 0.0140948648900788    | 2 |  | 0.992977342472977                  |
| 0.120484984287746             |   |  |                                    |
| AC067852.2 0.266864138955406  | 2 |  | 0.875086912069586                  |
| 0.201993272106768             |   |  |                                    |
| COASY 2.38081479279964 2      |   |  | 0.304097350661626                  |
| 0.178421495369393             |   |  |                                    |
| MLX 1.3449589712038 2         |   |  | 0.510441375389815                  |
| 0.108423007122107             |   |  |                                    |
| PSMC3IP 0.507890880118617     | 2 |  | 0.775734124899746                  |
| 0.477637176423665             |   |  |                                    |
| RETREG3 1.52547965629512 2    |   |  | 0.466386855073565                  |
| 0.231058581279197             |   |  |                                    |
| TUBG1 0.0353243432212741      | 2 |  | 0.982492890290317                  |
| 0.051840513501541             |   |  |                                    |
| TUBG2 3.7027971517644 2       |   |  | 0.157017411912459                  |
| 1.29040634419208              |   |  |                                    |
| PLEKHH3 2.46708353734293 2    |   |  | 0.291259176101258                  |
| 1.56274644611004              |   |  |                                    |
| AC100793.2 0.0471550276105702 | 2 |  | 0.976698264135507                  |
| 0.0574789409999851            |   |  |                                    |
| EZH1 0.224537997005009        | 2 |  | 0.893803793277625                  |
| 0.171255788921155             |   |  |                                    |
| VPS25 0.611620292867109       | 2 |  | 0.736526438354225                  |
| 0.117655082863563             |   |  |                                    |
| COA3 0.667014223706705        | 2 |  | 0.716406803641719                  |
| 0.0404395376980452            |   |  |                                    |



|            |                      |   |                    |
|------------|----------------------|---|--------------------|
| BECN1      | 0.0151900598627232   | 2 | 0.992433739427678  |
|            | 0.0201191728690707   |   |                    |
| PSME3      | 1.14125587174051     | 2 | 0.56517043646202   |
| AARSD1     | 0.0107521067677669   | 2 | 0.994638371729473  |
|            | 0.0393051858156573   |   |                    |
| RUNDC1     | 1.05618260631548     | 2 | 0.589729510988139  |
|            | 0.265009435868177    |   |                    |
| RPL27      | 6.86072587367022     | 2 | 0.0323751884919209 |
|            | 0.112000396034507    |   |                    |
| IFI35      | 4.51940742140892     | 2 | 0.104381407267161  |
|            | 0.297898168416564    |   |                    |
| VAT1       | 0.113581046077084    | 2 | 0.944791960788109  |
|            | 0.155217622691877    |   |                    |
| BRCA1      | 1.90315459402008     | 2 | 0.386131498821606  |
|            | 0.310879089206608    |   |                    |
| AC060780.1 | 1.57539166409795     | 2 | 0.454891735614364  |
|            | 0.370526080151499    |   |                    |
| NBR1       | 0.745148423708996    | 2 | 0.68895852077115   |
|            | 0.297632193883602    |   |                    |
| TMEM106A   | 0.488886772857577    | 2 | 0.78314032348084   |
|            | 0.35745732634502     |   |                    |
| LINC00910  | 0.622090655272363    | 2 | 0.732680664434046  |
|            | 0.818735913323257    |   |                    |
| DHX8       | 0.921606664697706    | 2 | 0.630776718575851  |
|            | 0.249326724076472    |   |                    |
| TMEM101    | 0.185891589110143    | 2 | 0.911242893283912  |
|            | 0.0327813886814563   |   |                    |
| LSM12      | 5.33518004830679     | 2 | 0.0694193227692115 |
|            | 0.442984161296363    |   |                    |
| G6PC3      | 2.14116988057305     | 2 | 0.342807936587871  |
|            | 0.290802358445805    |   |                    |
| HDAC5      | 1.74102373144161     | 2 | 0.418737157185556  |
|            | 0.38887064492963     |   |                    |
| ASB16-AS1  | 1.45029888348136     | 2 | 0.484252196056624  |
|            | 0.506694045632089    |   |                    |
| TMUB2      | 0.307077538769249    | 2 | 0.85766751231259   |
|            | 0.127297107361214    |   |                    |
| ATXN7L3    | 0.339160166639593    | 2 | 0.844019159917502  |
|            | 0.258530454926303    |   |                    |
| UBTF       | 1.13251930180875     | 2 | 0.567644662109715  |
|            | 0.170516840349391    |   |                    |
| AC003102.1 | 0.000175045026565998 | 2 | 0.9999124813167    |
|            | 0.00851099223204572  |   |                    |
| SLC25A39   | 2.99017438238989     | 2 | 0.224229053079103  |
|            | 0.249973386065728    |   |                    |
| GRN        | 6.1724954629777      | 2 | 0.045673010679167  |
|            | 0.27021886297239     |   |                    |
| GPATCH8    | 0.9288308196919      | 2 | 0.628502414139685  |
|            | 0.164669990133045    |   |                    |
| CCDC43     | 0.756952704268257    | 2 | 0.684904167385456  |

|                    |                     |   |                    |
|--------------------|---------------------|---|--------------------|
| 0.198289643685519  |                     |   |                    |
| DBF4B              | 0.22983832991159    | 2 | 0.891438200440784  |
| 0.604289784004053  |                     |   |                    |
| EFTUD2             | 0.428176293601095   | 2 | 0.807277222982014  |
| 0.0807562528553525 |                     |   |                    |
| DCAKD              | 5.14721869887849    | 2 | 0.0762597998264165 |
| 1.72068279006917   |                     |   |                    |
| NMT1               | 0.024664457454606   | 2 | 0.98774350157791   |
| 0.0185475056535823 |                     |   |                    |
| ACBD4              | 7.0283744465194     | 2 | 0.0297719911048653 |
| 1.2097639143497    |                     |   |                    |
| AC142472.1         | 3.8750387917203     | 2 | 0.144060864889967  |
| 3.00983787320479   |                     |   |                    |
| HEXIM1             | 0.135878899486496   | 2 | 0.934317045001452  |
| 0.153841457495646  |                     |   |                    |
| AC138150.1         | 0.0125763278835061  | 2 | 0.993731565186135  |
| 0.04225718907864   |                     |   |                    |
| HEXIM2             | 0.0414344046964463  | 2 | 0.979495924553186  |
| 0.084252606924567  |                     |   |                    |
| AC008105.3         | 0.0465065695757479  | 2 | 0.977014989396981  |
| 0.161206044722905  |                     |   |                    |
| FMNL1              | 0.0468452116764852  | 2 | 0.976849574197283  |
| 0.0395447240077218 |                     |   |                    |
| MAP3K14            | 0.0218671842921895  | 2 | 0.989125962326793  |
| 0.0795402569370253 |                     |   |                    |
| ARHGAP27           | 1.6722015918088     | 2 | 0.43339713695843   |
| 0.481110803877171  |                     |   |                    |
| PLEKHM1            | 4.28538372414806    | 2 | 0.117338558300432  |
| 0.934098759437646  |                     |   |                    |
| AC091132.5         | 4.18694234225775    | 2 | 0.123258540896097  |
| 0.91409036853486   |                     |   |                    |
| KANSL1             | 7.11595523992276    | 2 | 0.0284963970225293 |
| 0.320647880900644  |                     |   |                    |
| KANSL1-AS1         | 1.34283575259485    | 2 | 0.510983552442499  |
| 0.395015893734267  |                     |   |                    |
| ARL17B             | 0.331310712012808   | 2 | 0.847338213897947  |
| 0.341290221819612  |                     |   |                    |
| LRR37A2            | 0.0256950839490381  | 2 | 0.987234635390699  |
| 0.0283571015503082 |                     |   |                    |
| ARL17A             | 0.417130705603627   | 2 | 0.81174798296397   |
| 0.0987355931828805 |                     |   |                    |
| FAM215B            | 6.37932964443698    | 2 | 0.0411856731483975 |
| 0.492428759138968  |                     |   |                    |
| NSF                | 1.17690394359635    | 2 | 0.555186063539725  |
| 0.383428072892768  |                     |   |                    |
| GOSR2              | 0.00131036114695955 | 2 | 0.999345034010446  |
| 0.0065388973221802 |                     |   |                    |
| CDC27              | 0.368249990771768   | 2 | 0.83183182218859   |
| 0.12077318711922   |                     |   |                    |
| MYL4               | 2.82565183380379    | 2 | 0.243454328445954  |
| 0.730699188354216  |                     |   |                    |

|          |                    |   |                      |
|----------|--------------------|---|----------------------|
| NPEPPS   | 0.0275462670544893 | 2 | 0.98632128211287     |
|          | 0.0347736127684218 |   |                      |
| KPNB1    | 5.54183675047196   | 2 | 0.0626044839256507   |
|          | 0.210354350479731  |   |                      |
| OSBPL7   | 3.41885434870312   | 2 | 0.180969426861402    |
|          | 1.89210428281005   |   |                      |
| MRPL10   | 9.63270352383517   | 2 | 0.00809627044750649  |
|          | 0.472085562880198  |   |                      |
| LRRC46   | 0.0414766094266596 | 2 | 0.979475255090654    |
|          | 0.21215333326933   |   |                      |
| SCRN2    | 0.0662155553768756 | 2 | 0.967434286138882    |
|          | 0.0661553793137297 |   |                      |
| SP2      | 0.403857792425843  | 2 | 0.817153028551578    |
|          | 0.237067384096115  |   |                      |
| PNP0     | 2.25480890900874   | 2 | 0.32387279299226     |
|          | 0.573902377152756  |   | 0.85083774044773     |
| CDK5RAP3 | 7.75302455691639   | 2 | 0.0207229752561019   |
|          | 0.573902377152756  |   |                      |
| NFE2L1   | 1.4629977579927    | 2 | 0.481187207894022    |
|          | 0.488452460597584  |   |                      |
| CBX1     | 2.81816306704859   | 2 | 0.244367623583093    |
|          | 0.192116444650574  |   |                      |
| SNX11    | 9.49259162120976   | 2 | 0.00868380214913467  |
|          | 0.764490665745127  |   |                      |
| SKAP1    | 10.6051706167803   | 2 | 0.00497870576439252  |
|          | 1.0329240613667    |   |                      |
| HOXB2    | 2.31071302942968   | 2 | 0.314945234275446    |
|          | 1.39245067905644   |   |                      |
| HOXB4    | 0.0253450494826901 | 2 | 0.987407433585969    |
|          | 0.0713207442361976 |   |                      |
| HOXB7    | 0.301316903447679  | 2 | 0.860141428317017    |
|          | 0.177973210797958  |   |                      |
| CALCOC02 | 0.314460840506789  | 2 | 0.854507140379745    |
|          | 0.128711434287162  |   |                      |
| ATP5MC1  | 0.444450215297914  | 2 | 0.800735092451031    |
|          | 0.0685737931402779 |   |                      |
| UBE2Z    | 1.73624876638689   | 2 | 0.419738079198356    |
|          | 0.320254706293782  |   |                      |
| SNF8     | 6.70664129583339   | 2 | 0.0349680445319311   |
|          | 0.292329590505758  |   |                      |
| GNGT2    | 1.25877743542074   | 2 | 0.532917464468468    |
|          | 0.406800382655194  |   |                      |
| ABI3     | 18.4446978872873   | 2 | 9.88063243475557e-05 |
|          | 0.47026030753867   |   |                      |
| ZNF652   | 0.0658618227016082 | 2 | 0.96760540783036     |
|          | 0.084725705039721  |   |                      |
| PHB      | 0.14003562187888   | 2 | 0.932377213243978    |
|          | 0.0376022827441989 |   |                      |
| SPOP     | 0.20493610577452   | 2 | 0.902606984979431    |
|          | 0.0641732462199406 |   |                      |
| SLC35B1  | 0.405686273510042  | 2 | 0.816406295522594    |

|                               |   |                      |
|-------------------------------|---|----------------------|
| 0.172179848154238             |   |                      |
| FAM117A 2.39509898852122 2    |   | 0.301933195128672    |
| 0.306187418149005             |   |                      |
| KAT7 0.612049593134874        | 2 | 0.73636835982202     |
| 0.245291863765521             |   |                      |
| ITGA3 0.640059168577699       | 2 | 0.726127554788601    |
| 0.899698708098923             |   |                      |
| PDK2 0.384439056160167        | 2 | 0.82512571034474     |
| 0.193159962277833             |   |                      |
| PPP1R9B 2.76517794316396 2    |   | 0.250928065745175    |
| 0.765978294889798             |   |                      |
| XYLT2 1.02029417382562e-06    | 2 | 0.999999489853043    |
| 1.31976599623888e-05          |   |                      |
| MRPL27 1.19796934019613 2     |   | 0.549369143937982    |
| 0.126915064029389             |   |                      |
| LRRC59 18.0866194696681 2     |   | 0.000118179047143618 |
| 0.396479857994991             |   |                      |
| ACSF2 0.288870723149888       | 2 | 0.865510855853631    |
| 0.164248905529443             |   |                      |
| RSAD1 0.00335491130618276     | 2 | 0.998323950489286    |
| 0.0289809954646833            |   |                      |
| SPATA20 0.01231446305498 2    |   | 0.993861685377384    |
| 0.0468651048712196            |   |                      |
| ANKRD40 0.0366288134995636    | 2 | 0.981852282839364    |
| 0.0785337824724688            |   |                      |
| AC005921.2 2.55128641769778 2 |   | 0.279251293540361    |
| 1.09678994473114              |   |                      |
| LUC7L3 0.0676802176114427     | 2 | 0.966726063265691    |
| 0.0251788699805981            |   |                      |
| TOB1 3.40510114229843 2       |   | 0.182218170437877    |
| 0.642865721787317             |   |                      |
| SPAG9 0.343511403542881       | 2 | 0.842184892316377    |
| 0.159875906500564             |   |                      |
| NME1 2.51624558084711 2       |   | 0.284187004654046    |
| 0.109743519336949             |   |                      |
| NME2 0.276420773009246        | 2 | 0.870915443614003    |
| 0.289672981620431             |   |                      |
| MBTD1 0.462385351312466       | 2 | 0.793586546495156    |
| 0.271809057629319             |   |                      |
| UTP18 0.0852407323894622      | 2 | 0.958275114649858    |
| 0.0483433382507736            |   |                      |
| COX11 2.20776997480087 2      |   | 0.331580392514815    |
| 0.188837430027124             |   |                      |
| MMD 0.203248910658214         | 2 | 0.903368743291482    |
| 0.115209557789654             |   |                      |
| PCTP 0.0880510374933991       | 2 | 0.956929537518987    |
| 0.0953920783916428            |   |                      |
| C17orf67 8.98610088293416 2   |   | 0.0111864680445115   |
| 0.83295874620628              |   |                      |
| DGKE 2.0812308256647 2        |   | 0.353237228330588    |

|                    |                      |   |                      |
|--------------------|----------------------|---|----------------------|
| 0.698547004158541  |                      |   |                      |
| TRIM25             | 4.42002122114708     | 2 | 0.109699484534888    |
| 0.931095750272262  |                      |   |                      |
| COIL               | 3.14156790784847     | 2 | 0.207882148433785    |
| 0.215168934603746  |                      |   |                      |
| SCPEP1             | 22.772614470925      | 2 | 1.13498363180087e-05 |
| 0.457572478222425  |                      |   |                      |
| AC007114.1         | 0.000667558092578567 | 2 | 0.999666276651739    |
| 0.0124542793017824 |                      |   |                      |
| AKAP1              | 0.23310159784024     | 2 | 0.889984885557232    |
| 0.226081436062862  |                      |   |                      |
| AC007114.2         | 2.73744939053149     | 2 | 0.25443123008925     |
| 1.1334018980023    |                      |   |                      |
| MSI2               | 7.20438037308876     | 2 | 0.0272639438850435   |
| 0.270439823967382  |                      |   |                      |
| MRPS23             | 0.106687773325475    | 2 | 0.948053933315151    |
| 0.0480066531272573 |                      |   |                      |
| VEZF1              | 0.269866995745897    | 2 | 0.873774017586662    |
| 0.126018734218521  |                      |   |                      |
| SRSF1              | 0.338417386156809    | 2 | 0.844332678612332    |
| 0.0721777109945227 |                      |   |                      |
| DYNLL2             | 0.818532247903445    | 2 | 0.664137465915456    |
| 0.32077075214619   |                      |   |                      |
| MKS1               | 2.53265925702444     | 2 | 0.281864272101684    |
| 0.560356764062918  |                      |   |                      |
| TSP0AP1-AS1        | 5.8524474730197      | 2 | 0.0535990606358321   |
| 1.37163634782843   |                      |   |                      |
| AC004687.1         | 15.1064057723504     | 2 | 0.000524427751929624 |
| 0.644926523528514  |                      |   |                      |
| SUPT4H1            | 6.20887462321687     | 2 | 0.0448497478929786   |
| 0.218952843346645  |                      |   |                      |
| MTMR4              | 6.39327889198281     | 2 | 0.0408994179947679   |
| 0.672379435918476  |                      |   |                      |
| RAD51C             | 0.00807050353072486  | 2 | 0.995972878922908    |
| 0.018967967114081  |                      |   |                      |
| TRIM37             | 1.25607493177375     | 2 | 0.533638056905381    |
| 0.465264053144098  |                      |   |                      |
| SKA2               | 2.354368932115       | 2 | 0.308145111398151    |
| 0.243867942225434  |                      |   |                      |
| PRR11              | 0.00465866280513218  | 2 | 0.997673379384643    |
| 0.0383718496093487 |                      |   |                      |
| SMG8               | 0.715770364555226    | 2 | 0.699153345592935    |
| 0.578565510304014  |                      |   |                      |
| YPEL2              | 1.67242375637765     | 2 | 0.433348996888196    |
| 0.520646730621259  |                      |   |                      |
| DHX40              | 0.339615865979956    | 2 | 0.843826872337451    |
| 0.221870554412866  |                      |   |                      |
| AC091271.1         | 0.0862387565747182   | 2 | 0.957797043071253    |
| 0.130573168901582  |                      |   |                      |
| CLTC               | 0.436983657039519    | 2 | 0.803730047082021    |

|                            |   |                                    |
|----------------------------|---|------------------------------------|
| 0.145193390701143          |   |                                    |
| PTRH2 6.03922363237324 2   |   | 0.0488201658823767                 |
| 0.739921693859033          |   |                                    |
| VMP1 2.47314400053364 2    |   | 0.29037792920881 0.252884968581231 |
| TUBD1 0.0132226661493269   | 2 | 0.993410473704091                  |
| 0.0683021411181964         |   |                                    |
| RPS6KB1 0.0313772898757227 | 2 | 0.984433780784747                  |
| 0.0555916520530767         |   |                                    |
| RNFT1 4.72635933466919 2   |   | 0.0941204750990414                 |
| 0.453380989295023          |   |                                    |
| HEATR6 0.375463372886059   | 2 | 0.828837065621688                  |
| 0.181175467275398          |   |                                    |
| USP32 0.540917976741441    | 2 | 0.763029192424908                  |
| 0.479290220337872          |   |                                    |
| APPBP2 4.1043610741258 2   |   | 0.128454498187531                  |
| 0.602072589893612          |   |                                    |
| PPM1D 2.1761277095496 2    |   | 0.336868088252941                  |
| 0.45002835451413           |   |                                    |
| BCAS3 2.09961915853591 2   |   | 0.350004390858296                  |
| 0.803110183339319          |   |                                    |
| NACA2 0.560180401324334    | 2 | 0.755715572336287                  |
| 0.711873012698634          |   |                                    |
| BRIP1 3.322542496889 2     |   | 0.189897419792942                  |
| 2.16680076875944           |   |                                    |
| INTS2 0.788569690579556    | 2 | 0.674161997018762                  |
| 0.309656991094297          |   |                                    |
| MED13 1.86257760391206 2   |   | 0.394045536316115                  |
| 0.4417127838911            |   |                                    |
| METTL2A 2.0097798662876 2  |   | 0.366084926403541                  |
| 0.374343227053147          |   |                                    |
| TLK2 0.847171194879183     | 2 | 0.654695133040814                  |
| 0.203999785085189          |   |                                    |
| DCAF7 0.635090369202568    | 2 | 0.727933788633208                  |
| 0.0971052296719539         |   |                                    |
| TAC01 4.7487427080763 2    |   | 0.0930729807770165                 |
| 0.604998552300965          |   |                                    |
| MAP3K3 0.328936854935185   | 2 | 0.848344540907029                  |
| 0.290914936623627          |   |                                    |
| STRADA 1.73841221937205 2  |   | 0.419284282884141                  |
| 0.334686388161691          |   |                                    |
| LIMD2 116.510808952197 2   | 0 | 0.468358814983721                  |
| CCDC47 4.33369288656722 2  |   | 0.114538250842413                  |
| 0.332979265959694          |   |                                    |
| DDX42 0.855991670237252    | 2 | 0.651814129521606                  |
| 0.204927590752989          |   |                                    |
| FTSJ3 0.829334258411014    | 2 | 0.660560125286747                  |
| 0.122194058913986          |   |                                    |
| PSMC5 0.268462487181131    | 2 | 0.874387844638459                  |
| 0.0421011507799743         |   |                                    |
| SMARCD2 0.995787033089293  | 2 | 0.607809653128781                  |

|                  |                     |                      |
|------------------|---------------------|----------------------|
| 0.21070235098347 |                     |                      |
| GH1              | 2.41858160356309 2  | 0.298408835417905    |
|                  | 2.1154656353289     |                      |
| CD79B            | 138.375272007949 2  | 0 0.467082169381001  |
| ICAM2            | 0.130058116737742   | 2 0.937040234121016  |
|                  | 0.0912181255905516  |                      |
| SNHG25           | 34.0169918594933 2  | 4.10491408642244e-08 |
|                  | 0.701915261305702   |                      |
| PECAM1           | 5.59252520523969 2  | 0.0610377592252572   |
|                  | 1.91188973233782    |                      |
| MILR1            | 3.19842327680783 2  | 0.202055748213074    |
|                  | 0.420870819973681   |                      |
| POLG2            | 0.395061511026497   | 2 0.82075489750142   |
|                  | 0.214751234495095   |                      |
| DDX5             | 23.8120921171529 2  | 6.74947348344723e-06 |
|                  | 0.145510987095071   |                      |
| CEP95            | 0.111558946498262   | 2 0.945747675557296  |
|                  | 0.0519037806765085  |                      |
| SMURF2           | 2.04470243925668 2  | 0.359748098217706    |
|                  | 0.654979951866769   |                      |
| LRR37A3          | 0.472664020737597   | 2 0.789518502084275  |
|                  | 0.483836492832367   |                      |
| GNA13            | 0.0212782793484048  | 2 0.989417255795349  |
|                  | 0.0372397780155104  |                      |
| RGS9             | 2.65957259910818 2  | 0.264533786247984    |
|                  | 0.566440708815395   |                      |
| CEP112           | 3.39956113110294 2  | 0.182723615509653    |
|                  | 1.90722795119689    |                      |
| PRKCA            | 5.94873204298897 2  | 0.0510798072409585   |
|                  | 1.35738138752052    |                      |
| HELZ             | 2.56487064199573 2  | 0.277361014198512    |
|                  | 0.328682535128866   |                      |
| PSMD12           | 1.19505170292336 2  | 0.550171158738247    |
|                  | 0.17172040566063    |                      |
| PITPNC1          | 0.00925024168058936 | 2 0.995385558560249  |
|                  | 0.0149716657923636  |                      |
| NOL11            | 12.2927514873125 2  | 0.0021412280837112   |
|                  | 0.704367078252533   |                      |
| BPTF             | 3.2740219222336 2   | 0.194560723587016    |
|                  | 0.14721730802446    |                      |
| C17orf58         | 4.54178910096787 2  | 0.103219803446353    |
|                  | 0.483181026285592   |                      |
| KPNA2            | 6.50357230532738 2  | 0.0387050129917911   |
|                  | 0.341743020867736   |                      |
| AC005332.7       | 2.02853204505644 2  | 0.362668522692842    |
|                  | 0.890884895909229   |                      |
| AC005332.8       | 3.43623165354222 2  | 0.179403857605462    |
|                  | 0.984514546237394   |                      |
| AC005332.3       | 1.61752528852322 2  | 0.445408854594254    |
|                  | 2.16465985130229    |                      |

|                    |                    |   |                     |
|--------------------|--------------------|---|---------------------|
| AC005332.5         | 4.90422481064212   | 2 | 0.0861114918646262  |
| 1.009271216952     |                    |   |                     |
| AMZ2               | 23.693149603397    | 2 | 7.1630492002317e-06 |
| 0.463538008578754  |                    |   |                     |
| ARSG               | 0.395538203641912  | 2 | 0.820559296913333   |
| 0.315433136182081  |                    |   |                     |
| SLC16A6            | 0.957057770653852  | 2 | 0.619694363040564   |
| 0.931819100686224  |                    |   |                     |
| WIPI1              | 4.41720071589397   | 2 | 0.109854297658235   |
| 0.456908112776009  |                    |   |                     |
| PRKAR1A            | 0.0327359279409324 | 2 | 0.983765263275164   |
| 0.0196369269817527 |                    |   |                     |
| ABCA6              | 0.613597615498437  | 2 | 0.735798622997388   |
| 0.357027921219545  |                    |   |                     |
| ABCA5              | 0.0536510430321679 | 2 | 0.973531086934815   |
| 0.143708905530995  |                    |   |                     |
| MAP2K6             | 0.432700419141044  | 2 | 0.805453175064094   |
| 0.252284463840751  |                    |   |                     |
| LINC01483          | 0.791082867836744  | 2 | 0.673315384752553   |
| 0.717466762083708  |                    |   |                     |
| ROCR               | 0.0737551549130154 | 2 | 0.963794118254382   |
| 0.165189762257785  |                    |   |                     |
| LINC01152          | 0.0735641201866924 | 2 | 0.963886181723948   |
| 0.211977178154585  |                    |   |                     |
| SOX9               | 1.07547166601312   | 2 | 0.584069186576      |
| 0.671489676395359  |                    |   |                     |
| SLC39A11           | 4.62016006155158   | 2 | 0.0992533079225496  |
| 0.996943284474119  |                    |   |                     |
| SSTR2              | 5.66126995944399   | 2 | 0.0589753935984821  |
| 1.5653213448216    |                    |   |                     |
| COG1               | 1.77576227637061   | 2 | 0.411526798032242   |
| 0.563836643296311  |                    |   |                     |
| FAM104A            | 0.582772628085008  | 2 | 0.747226957986573   |
| 0.0753034648503337 |                    |   |                     |
| C17orf80           | 0.0192946792238247 | 2 | 0.990399046680929   |
| 0.0557079578151877 |                    |   |                     |
| RPL38              | 34.8881255768557   | 2 | 2.6554601517681e-08 |
| 0.268825776394084  |                    |   |                     |
| RAB37              | 7.31507905301702   | 2 | 0.025795904847128   |
| 2.47887457190669   |                    |   |                     |
| SLC9A3R1           | 0.311233741252152  | 2 | 0.855887043028962   |
| 0.157815843346142  |                    |   |                     |
| NAT9               | 0.901959142394629  | 2 | 0.63700385527113    |
| 0.247690964500481  |                    |   |                     |
| TMEM104            | 2.98447060234608   | 2 | 0.224869442404124   |
| 0.550690660335478  |                    |   |                     |
| FDXR               | 5.24592604150315   | 2 | 0.0725874657047657  |
| 1.04429466510305   |                    |   |                     |
| MRPL58             | 2.99028676079614   | 2 | 0.224216454181257   |
| 0.329800387903806  |                    |   |                     |
| KCTD2              | 1.31978382992882   | 2 | 0.516907201405718   |



|                             |   |                      |
|-----------------------------|---|----------------------|
| 1.15955108125786            |   |                      |
| ATP5PD 7.95662332396078 2   |   | 0.0187172136596112   |
| 0.285825103705173           |   |                      |
| ARMC7 2.95628775320556 2    |   | 0.228060604394043    |
| 0.74593494155384            |   |                      |
| NT5C 28.5158940789484 2     |   | 6.42469148326441e-07 |
| 0.738696534868148           |   |                      |
| JPT1 3.37016392502495 2     |   | 0.185429233087281    |
| 0.188704110515803           |   |                      |
| SUM02 8.69543738151475 2    |   | 0.0129362906227932   |
| 0.151005251961458           |   |                      |
| NUP85 0.00607859268367619   | 2 | 0.996965317643682    |
| 0.0230517444208127          |   |                      |
| GGA3 0.0650564603655863     | 2 | 0.967995122766325    |
| 0.0979860331099083          |   |                      |
| MRPS7 0.7113884296953 2     |   | 0.700686847114178    |
| 0.0982888389020908          |   |                      |
| MIF4GD 0.151924129081973    | 2 | 0.926851366424498    |
| 0.0767350560547448          |   |                      |
| SLC25A19 6.87652620348669 2 |   | 0.0321204268185424   |
| 0.62984984875951            |   |                      |
| GRB2 0.297245008943954      | 2 | 0.861894414782678    |
| 0.0403311698868795          |   |                      |
| TMEM94 4.44179797935324 2   |   | 0.108511514232176    |
| 2.38909151324925            |   |                      |
| TSEN54 0.0616221675375423   | 2 | 0.969658740048622    |
| 0.0719742198817412          |   |                      |
| RECQL5 0.412232187397832    | 2 | 0.813738600874901    |
| 0.207988761543913           |   |                      |
| SAP30BP 0.058945666956377   | 2 | 0.970957254814346    |
| 0.0310334675189276          |   |                      |
| GALK1 0.000197065534275474  | 2 | 0.999901472087056    |
| 0.00245511974063752         |   |                      |
| H3F3B 23.0412025701025 2    |   | 9.92353563800119e-06 |
| 0.125456701037632           |   |                      |
| UNK 1.44087957318258 2      |   | 0.486538235909545    |
| 0.344881510231481           |   |                      |
| UNC13D 1.74797555073145 2   |   | 0.417284191314139    |
| 0.219148709800536           |   |                      |
| WBP2 6.95508626025826 2     |   | 0.0308831938889048   |
| 0.291646121309721           |   |                      |
| TRIM47 0.307396339742567    | 2 | 0.857530810589185    |
| 0.515549756048371           |   |                      |
| MRPL38 0.99576188286194 2   |   | 0.607817296452321    |
| 0.477223433411553           |   |                      |
| ACOX1 4.23092147114679 2    |   | 0.120577722307212    |
| 0.456054764705313           |   |                      |
| TEN1 0.238221177945365      | 2 | 0.887709624438034    |
| 0.112949608037108           |   |                      |
| SRP68 6.03043308656696 2    |   | 0.0490352160905804   |

|                             |   |                      |
|-----------------------------|---|----------------------|
| 0.353441246496183           |   |                      |
| EXOC7 0.0968231749299817    | 2 | 0.952741569879662    |
| 0.0520844709104986          |   |                      |
| UBALD2 12.1084305611698 2   |   | 0.00234794387509163  |
| 0.291687287756131           |   |                      |
| QRICH2 0.221939308839319    | 2 | 0.894965906776795    |
| 0.234169982089865           |   |                      |
| PRPSAP1 3.19060858476658 2  |   | 0.202846794375905    |
| 0.242006484738507           |   |                      |
| UBE20 0.952862630688133     | 2 | 0.620995579554284    |
| 0.348316613770219           |   |                      |
| RHBDF2 12.1058994932179 2   |   | 0.00235091715883817  |
| 0.422003776353842           |   |                      |
| PRCD 1.29170726860749 2     |   | 0.524214863266953    |
| 1.34372858890449            |   |                      |
| JMJD6 0.109197517890471     | 2 | 0.946864992852155    |
| 0.0785847850897327          |   |                      |
| METTL23 0.0106749190412198  | 2 | 0.994676759407558    |
| 0.0131543190101351          |   |                      |
| SRSF2 0.69391056563256 2    |   | 0.706836935308151    |
| 0.0668700830561518          |   |                      |
| MFSD11 0.136161872867027    | 2 | 0.93418486092646     |
| 0.105543687050161           |   |                      |
| SEC14L1 7.84441558669822 2  |   | 0.0197973380280221   |
| 0.311419454538337           |   |                      |
| SEPT9 16.9610057336983 2    |   | 0.00020747434451085  |
| 0.429605685374183           |   |                      |
| TNRC6C 0.0268762412030868   | 2 | 0.986651767846678    |
| 0.113083257010654           |   |                      |
| TMC6 18.9502494796637 2     |   | 7.67371402077277e-05 |
| 0.532351043352567           |   |                      |
| TMC8 16.7854681303671 2     |   | 0.000226507145702493 |
| 1.30697906743391            |   |                      |
| C17orf99 7.63735253312019 2 |   | 0.0219568466777651   |
| 4.21197431153073            |   |                      |
| SYNGR2 80.7543482523942 2   | 0 | 0.583641105577605    |
| TK1 1.87757842216071 2      |   | 0.391101089660994    |
| 0.515080638289212           |   |                      |
| AFMID 2.26594392511299 2    |   | 0.322074638872982    |
| 0.411787349737107           |   |                      |
| BIRC5 8.03587626170011 2    |   | 0.0179900197920627   |
| 1.23637831356849            |   |                      |
| PGS1 1.61988870483333 2     |   | 0.444882822188053    |
| 0.381302963775207           |   |                      |
| LINC02081 0.540659905590778 | 2 | 0.763127656688307    |
| 0.462858243555475           |   |                      |
| CYTH1 4.83874585938534 2    |   | 0.0889773950517829   |
| 0.41112158761097            |   |                      |
| USP36 0.0743460740758704    | 2 | 0.963509398111339    |
| 0.132976075026266           |   |                      |

|            |                      |   |                      |
|------------|----------------------|---|----------------------|
| LGALS3BP   | 10.3549606994963     | 2 | 0.00564220490228362  |
|            | 1.0075372231359      |   |                      |
| CANT1      | 0.586504328767749    | 2 | 0.745834044200371    |
|            | 0.177422277296602    |   |                      |
| ENGASE     | 0.103344168699227    | 2 | 0.949640217681308    |
|            | 0.227826671126217    |   |                      |
| CBX8       | 2.839804204837       | 2 | 0.241737681273029    |
|            | 0.359222960168461    |   |                      |
| CBX4       | 1.06993101632528     | 2 | 0.585689491303081    |
|            | 0.651158223585487    |   |                      |
| EIF4A3     | 1.57984655548419     | 2 | 0.453879616615556    |
|            | 0.0833032696423684   |   |                      |
| SGSH       | 1.04979257952661     | 2 | 0.591616717895112    |
|            | 0.543834055807064    |   |                      |
| SLC26A11   | 2.17758402774761     | 2 | 0.336622883974012    |
|            | 2.53165309903736     |   |                      |
| RNF213     | 7.68073868916916     | 2 | 0.0214856642656789   |
|            | 0.485039768475443    |   |                      |
| ENDOV      | 0.520279542506824    | 2 | 0.770943822488255    |
|            | 0.206450871526753    |   |                      |
| RPTOR      | 1.07362979396014     | 2 | 0.584607324689235    |
|            | 0.958909529763872    |   |                      |
| CHMP6      | 2.41873871058575     | 2 | 0.298385395276736    |
|            | 0.210563677696907    |   |                      |
| CEP131     | 0.544679908744028    | 2 | 0.761595309421312    |
|            | 0.437232103541166    |   |                      |
| TEPSIN     | 0.705023669131871    | 2 | 0.702920251005436    |
|            | 0.258690467521501    |   |                      |
| NDUF8      | 0.607953938460651    | 2 | 0.737877860149946    |
|            | 0.0986353289922206   |   |                      |
| SLC38A10   | 6.94602265785466     | 2 | 0.0310234679911887   |
|            | 0.662273116114942    |   |                      |
| ACTG1      | 14.9496162404629     | 2 | 0.000567194590364251 |
|            | 0.158798420905539    |   |                      |
| FAAP100    | 3.44774868811667e-06 | 2 | 0.999998276127142    |
|            | 0.000534621746512771 |   |                      |
| NPL0C4     | 1.03095607368285     | 2 | 0.597215035580544    |
|            | 0.396108506444634    |   |                      |
| OXLD1      | 0.308566570481379    | 2 | 0.857029202895667    |
|            | 0.0380260704158289   |   |                      |
| CCDC137    | 0.132848418988032    | 2 | 0.93573383290954     |
|            | 0.0854400925264558   |   |                      |
| ARL16      | 2.312843242116       | 2 | 0.314609962690312    |
|            | 0.311636540115456    |   |                      |
| HGS        | 0.056575081444125    | 2 | 0.972108805742652    |
|            | 0.064844638593505    |   |                      |
| AC139530.1 | 0.758826529268643    | 2 | 0.684262772621903    |
|            | 0.303192898721113    |   |                      |
| MRPL12     | 1.61684304907467     | 2 | 0.445560818257351    |
|            | 0.191144063427576    |   |                      |

|            |                     |   |                      |
|------------|---------------------|---|----------------------|
| MCRIP1     | 6.41127266189768    | 2 | 0.0405331009632632   |
|            | 0.349916200491117   |   |                      |
| P4HB       | 19.9719591258957    | 2 | 4.60409397394779e-05 |
|            | 0.328333346709176   |   |                      |
| ARHGDIA    | 3.17585918213682    | 2 | 0.204348258516989    |
|            | 0.108379185964298   |   |                      |
| AC145207.5 | 2.05959638635807    | 2 | 0.357079014279142    |
|            | 2.47978645956018    |   |                      |
| ALYREF     | 5.48117780657638    | 2 | 0.0645323323980926   |
|            | 0.454810954442221   |   |                      |
| ANAPC11    | 1.07982634722587    | 2 | 0.582798852495993    |
|            | 0.0929559765176788  |   |                      |
| PCYT2      | 0.340976279034834   | 2 | 0.843253090957901    |
|            | 0.168220508111684   |   |                      |
| SIRT7      | 6.60187714805356    | 2 | 0.0368485660587925   |
|            | 0.249090262429061   |   |                      |
| MAFG       | 1.06088801167943    | 2 | 0.588343683645088    |
|            | 0.357139137012434   |   |                      |
| PYCR1      | 3.77706527254861    | 2 | 0.151293648848821    |
|            | 1.10864535083649    |   |                      |
| ASPSCR1    | 1.41453402902523    | 2 | 0.492989691688199    |
|            | 0.303289686402803   |   |                      |
| CENPX      | 0.355837833606387   | 2 | 0.837010288207315    |
|            | 0.105757182563798   |   |                      |
| LRRC45     | 0.0315605054928112  | 2 | 0.984343603093986    |
|            | 0.11048109760232    |   |                      |
| DCXR       | 8.25673437995408    | 2 | 0.0161091605590303   |
|            | 0.369553090588661   |   |                      |
| RFNG       | 0.0424142587562528  | 2 | 0.979016160558338    |
|            | 0.0966194733528921  |   |                      |
| GPS1       | 1.00658168060257    | 2 | 0.60453794482528     |
|            | 0.700895895800153   | 2 | 0.155505082250637    |
|            | 0.140275952204301   |   | 0.704372496858572    |
| FASN       | 0.70150620740412    | 2 | 0.704157586296668    |
|            | 0.446274023930907   |   |                      |
| CCDC57     | 6.33773593093446    | 2 | 0.0420511743507828   |
|            | 0.610971613765748   |   |                      |
| SLC16A3    | 0.00484354213659195 | 2 | 0.997581159053419    |
|            | 0.0210523926682187  |   |                      |
| CSNK1D     | 0.315482737833628   | 2 | 0.854070642621954    |
|            | 0.0901298910270461  |   |                      |
| OGFOD3     | 0.709933730886266   | 2 | 0.701196676664813    |
|            | 0.173959724763193   |   |                      |
| HEXDC      | 2.39924690188659    | 2 | 0.301307647664306    |
|            | 0.474152434763902   |   |                      |
| CYBC1      | 18.4187761272835    | 2 | 0.000100095276192369 |
|            | 0.447927288990186   |   |                      |
| NARF       | 6.95633841763351    | 2 | 0.0308638646308549   |
|            | 0.43467107701885    |   |                      |
| FOXK2      | 1.33461843144496    | 2 | 0.513087329311902    |

|                               |   |                    |                   |
|-------------------------------|---|--------------------|-------------------|
| 0.812493781511538             |   |                    |                   |
| WDR45B 4.52164144946883 2     |   | 0.10426487686594   | 0.314117324587683 |
| FN3KRP 3.54464726450652 2     |   | 0.169937657079454  |                   |
| 0.56669118444947              |   |                    |                   |
| TBCD 6.85352779362744 2       |   | 0.0324919180221283 |                   |
| 1.1733195635238               |   |                    |                   |
| B3GNTL1 5.05236292080484 2    |   | 0.0799637829129255 |                   |
| 1.45873916189059              |   |                    |                   |
| METRNL 0.340045654723442      | 2 | 0.843645558174254  |                   |
| 0.31042850322137              |   |                    |                   |
| AP005530.1 0.408327632214092  | 2 | 0.815328796257364  |                   |
| 0.151961258705353             |   |                    |                   |
| USP14 5.37332880474565 2      |   | 0.0681077409211285 |                   |
| 0.227796395231186             |   |                    |                   |
| THOC1 4.09446273220296 2      |   | 0.129091817259457  |                   |
| 0.533177844242713             |   |                    |                   |
| COLEC12 0.456515698945577     | 2 | 0.795919006078205  |                   |
| 0.438775948442264             |   |                    |                   |
| TYMS 2.4941957325983 2        |   | 0.287337479780766  |                   |
| 0.701103037718375             |   |                    |                   |
| ENOSF1 0.0326549637306357     | 2 | 0.983805088970101  |                   |
| 0.127834646061096             |   |                    |                   |
| METTL4 0.114167992137961      | 2 | 0.944514730510037  |                   |
| 0.153172206668819             |   |                    |                   |
| NDC80 0.283964446756941       | 2 | 0.86763667999771   |                   |
| 0.576028862341543             |   |                    |                   |
| SMCHD1 2.3629036300842 2      |   | 0.306832950385633  |                   |
| 0.15623488924795              |   |                    |                   |
| EMILIN2 0.471515981226594     | 2 | 0.789971831399349  |                   |
| 0.244869585162368             |   |                    |                   |
| LPIN2 0.232544616702504       | 2 | 0.890232772469777  |                   |
| 0.251683494920758             |   |                    |                   |
| AP005329.3 0.141028661152804  | 2 | 0.93191438455982   |                   |
| 0.206574229768593             |   |                    |                   |
| MYL12A 3.650820668779 2       |   | 0.161151504556795  |                   |
| 0.106542939706208             |   |                    |                   |
| AP005329.1 4.03141730945408 2 |   | 0.133225958700175  |                   |
| 1.09269697953224              |   |                    |                   |
| MYL12B 4.55206754673549 2     |   | 0.102690694639016  |                   |
| 0.0717247846658361            |   |                    |                   |
| TGIF1 0.705664104809537       | 2 | 0.702695199436473  |                   |
| 0.144439449143183             |   |                    |                   |
| DLGAP1 6.87025588454205 2     |   | 0.0322212875034882 |                   |
| 2.94359530396473              |   |                    |                   |
| DLGAP1-AS1 3.41818603020829 2 |   | 0.181029909573753  |                   |
| 0.626024392563475             |   |                    |                   |
| LINC00526 0.0724537002769252  | 2 | 0.964421489517773  |                   |
| 0.118384524957121             |   |                    |                   |
| LINC00667 4.23868615994632 2  |   | 0.120110505597212  |                   |
| 0.257413009373632             |   |                    |                   |

|            |                      |   |                     |
|------------|----------------------|---|---------------------|
| ZBTB14     | 0.667583321115287    | 2 | 0.716202980014247   |
|            | 0.146988811689953    |   |                     |
| RAB12      | 1.44907378136903     | 2 | 0.484548916119586   |
|            | 0.878614369403541    |   |                     |
| NDUFV2     | 7.77717179092256     | 2 | 0.0204742783463986  |
|            | 0.213719554720752    |   |                     |
| NDUFV2-AS1 | 0.859067787244634    | 2 | 0.650812371835315   |
|            | 0.563222307810594    |   |                     |
| ANKRD12    | 0.138883599906527    | 2 | 0.932914427467861   |
|            | 0.0454318159765794   |   |                     |
| TWSG1      | 0.28589618610375     | 2 | 0.866799060621662   |
|            | 0.253697027787035    |   |                     |
| RALBP1     | 0.131638831839205    | 2 | 0.936299929887697   |
|            | 0.0491841289997662   |   |                     |
| PPP4R1     | 2.66747213371981     | 2 | 0.263491000084806   |
|            | 0.822498733944452    |   |                     |
| VAPA       | 0.000823093837736866 | 2 | 0.999588537754949   |
|            | 0.00241356503333709  |   |                     |
| NAPG       | 0.716065289009467    | 2 | 0.699050254484704   |
|            | 0.185877276058665    |   |                     |
| LINC01887  | 13.4665641427034     | 2 | 0.00119061884245764 |
|            | 1.3119730622582      |   |                     |
| CHMP1B     | 2.88926312679092     | 2 | 0.235832950042547   |
|            | 0.295365260490568    |   |                     |
| MPPE1      | 0.700788163611972    | 2 | 0.704410439675669   |
|            | 0.288721050325837    |   |                     |
| IMPA2      | 1.04963637816162     | 2 | 0.591662925368949   |
|            | 0.584484846367822    |   |                     |
| TUBB6      | 0.00194774518887744  | 2 | 0.999026601465573   |
|            | 0.0171697057490758   |   |                     |
| AFG3L2     | 2.9661512320003      | 2 | 0.226938637823776   |
|            | 0.382032666796537    |   |                     |
| PSMG2      | 0.91650064195095     | 2 | 0.632389156122331   |
|            | 0.113677256754532    |   |                     |
| CEP76      | 0.280829133323489    | 2 | 0.868997903153325   |
|            | 0.409842615549962    |   |                     |
| PTPN2      | 0.216547718405176    | 2 | 0.897381806510108   |
|            | 0.0647010476484009   |   |                     |
| SEH1L      | 1.34900140532947     | 2 | 0.509410704527952   |
|            | 0.283150000278299    |   |                     |
| CEP192     | 0.437930975553646    | 2 | 0.803349443050468   |
|            | 0.405484595510561    |   |                     |
| LDLRAD4    | 1.10580348578139     | 2 | 0.575278077013149   |
|            | 0.406086067258744    |   |                     |
| FAM210A    | 0.517275752915032    | 2 | 0.772102568943      |
|            | 0.218711178515123    |   |                     |
| RNMT       | 1.6711960505266      | 2 | 0.43361509110071    |
| ZNF519     | 1.8874891358769      | 2 | 0.210270615418435   |
|            | 1.68897923194543     |   | 0.389167838125766   |
| ROCK1      | 2.04898064668524     | 2 | 0.358979382199369   |

|                    |                      |   |                      |
|--------------------|----------------------|---|----------------------|
| 0.18841339444334   |                      |   |                      |
| ESC01              | 0.088457464106896    | 2 | 0.956735096460517    |
| 0.0823814038391828 |                      |   |                      |
| SNRPD1             | 2.55304102499633     | 2 | 0.279006412794565    |
| 0.123669900690241  |                      |   |                      |
| ABHD3              | 2.81921351474643     | 2 | 0.244239309579021    |
| 0.280767947580393  |                      |   |                      |
| MIB1               | 2.76919419022699     | 2 | 0.250424676794395    |
| 1.13464466814111   |                      |   |                      |
| RBBP8              | 0.950634186479514    | 2 | 0.621687892179092    |
| 0.330000445742132  |                      |   |                      |
| TMEM241            | 6.69888791871183     | 2 | 0.0351038678524134   |
| 1.77512374258274   |                      |   |                      |
| RIOK3              | 0.98452247564472     | 2 | 0.611242665270595    |
| 0.180514018418069  |                      |   |                      |
| RMC1               | 3.0650019097009      | 2 | 0.215994798015306    |
| 0.394813633256955  |                      |   |                      |
| NPC1               | 0.13728805058026     | 2 | 0.933658979914017    |
| 0.253643256183053  |                      |   |                      |
| TTC39C             | 16.1136576600789     | 2 | 0.000316930253107084 |
| 1.02588128303215   |                      |   |                      |
| IMPACT             | 6.02415464079603     | 2 | 0.0491893904303214   |
| 1.30741241581927   |                      |   |                      |
| LINC01915          | 1.50930680393966     | 2 | 0.470173547718258    |
| 1.12010169702395   |                      |   |                      |
| SS18               | 0.082415057533591    | 2 | 0.959629958459748    |
| 0.0423892771359371 |                      |   |                      |
| PSMA8              | 8.60229585865845     | 2 | 0.013552992201864    |
| 1.62777140000756   |                      |   |                      |
| TAF4B              | 0.770447172332132    | 2 | 0.680298513862501    |
| 0.650117518152575  |                      |   |                      |
| KCTD1              | 1.18715774602209     | 2 | 0.552346963548624    |
| 0.427535914347255  |                      |   |                      |
| TRAPPC8            | 2.28570950816223     | 2 | 0.31890731912122     |
| RNF138             | 1.05079612769497     | 2 | 0.55859603016108     |
| 0.259210095783452  |                      |   | 0.591319934423659    |
| KLHL14             | 2.16615493174171     | 2 | 0.3385520384765      |
| AC012123.1         | 0.000895076400124945 | 2 | 0.445539777515548    |
| 0.0192965128561538 |                      |   | 0.99955256193022     |
| MAPRE2             | 6.50955226584255     | 2 | 0.0385894586058302   |
| 0.63872664090406   |                      |   |                      |
| ZNF397             | 0.789589652379684    | 2 | 0.673818274930034    |
| 0.134264100843872  |                      |   |                      |
| ZSCAN30            | 0.12031874558845     | 2 | 0.941614453898657    |
| 0.196853726224772  |                      |   |                      |
| ZNF24              | 0.286048990324787    | 2 | 0.866732837873846    |
| 0.0939489091398913 |                      |   |                      |
| IN080C             | 0.0241699280442154   | 2 | 0.987987765881362    |
| 0.0223466433314514 |                      |   |                      |
| GALNT1             | 19.0643578746427     | 2 | 7.24815191175399e-05 |

|                             |   |                                    |
|-----------------------------|---|------------------------------------|
| 1.09855738098438            |   |                                    |
| C18orf21 2.87970051222777 2 |   | 0.236963239821911                  |
| 0.474728282833752           |   |                                    |
| RPRD1A 1.99639479728758 2   |   | 0.368543179198826                  |
| 0.404708462351598           |   |                                    |
| SLC39A6 2.68569230753168 2  |   | 0.261101475091545                  |
| 0.568949653600404           |   |                                    |
| ELP2 1.31240485660477 2     |   | 0.518817846112532                  |
| 0.135381702758939           |   |                                    |
| FHOD3 1.36084268481556 2    |   | 0.5064035781056 0.480011131539462  |
| TPGS2 0.59724228256281 2    |   | 0.74184040890882 0.103252839742806 |
| KIAA1328 1.20139465887688 2 |   | 0.548429066987873                  |
| 0.4818061158671             |   |                                    |
| PIK3C3 3.17182991544723 2   |   | 0.20476036031017 0.634046660261031 |
| SETBP1 5.68590359539113 2   |   | 0.0582534595027014                 |
| 0.995706228641706           |   |                                    |
| EPG5 3.74636195758198 2     |   | 0.153634176649416                  |
| 1.69748384050744            |   |                                    |
| ATP5F1A 14.1593808150297 2  |   | 0.000842033795364627               |
| 0.209505842242021           |   |                                    |
| HAUS1 0.0509105376831475    | 2 | 0.974865984875276                  |
| 0.0294463193595761          |   |                                    |
| C18orf25 4.94805013330973 2 |   | 0.0842450835741922                 |
| 0.778600914926405           |   |                                    |
| PIAS2 1.51100665093418 2    |   | 0.469774105943783                  |
| 0.285651781212094           |   |                                    |
| KATNAL2 0.0398566542313687  | 2 | 0.980268929490575                  |
| 0.207872622496631           |   |                                    |
| HDHD2 0.000809911901895062  | 2 | 0.999595126032647                  |
| 0.00615717841536453         |   |                                    |
| IER3IP1 0.7994359647003 2   |   | 0.670509114778778                  |
| 0.140143701093907           |   |                                    |
| SMAD2 1.30812572393858 2    |   | 0.519929079664118                  |
| 0.218845235724406           |   |                                    |
| SMAD7 2.32301702476433 2    |   | 0.313013639603901                  |
| 0.714609999065117           |   |                                    |
| DYM 2.49654689733224 2      |   | 0.286999889377707                  |
| 0.36365519050729            |   |                                    |
| C18orf32 2.34533349496294 2 |   | 0.309540373619974                  |
| 0.274125764460283           |   |                                    |
| RPL17 9.90069366775825 2    |   | 0.00708095258885144                |
| 0.229339997655471           |   |                                    |
| ACAA2 0.874033547986464     | 2 | 0.645960595981083                  |
| 0.178109081529984           |   |                                    |
| MBD1 0.00381762604562768    | 2 | 0.998093007602169                  |
| 0.0187598317385283          |   |                                    |
| CXXC1 0.0131497261148443    | 2 | 0.993446704061851                  |
| 0.0250733677235896          |   |                                    |
| ME2 3.33472751074832 2      |   | 0.188743985667454                  |
| 0.242231353219713           |   |                                    |



|            |                   |   |                      |
|------------|-------------------|---|----------------------|
| ELAC1      | 2.5937157324728   | 2 | 0.273389471146582    |
|            | 0.539355003246177 |   |                      |
| SMAD4      | 0.147950750423772 | 2 | 0.928694562466542    |
|            | 0.175710011232029 |   |                      |
| MEX3C      | 0.916778406268036 | 2 | 0.632301334649848    |
|            | 0.374939159778082 |   |                      |
| MBD2       | 0.422158988423865 | 2 | 0.809709697088533    |
|            | 0.154558700588686 |   |                      |
| AC093462.1 | 0.176791100152834 | 2 | 0.915398719069024    |
|            | 0.276015427479303 |   |                      |
| POLI       | 0.52587170881275  | 2 | 0.768791210298096    |
|            | 0.478381327083331 |   |                      |
| TCF4       | 17.8772956901629  | 2 | 0.000131218347814932 |
|            | 0.309217211164895 |   |                      |
| TXNL1      | 4.2840216372825   | 2 | 0.117418498173148    |
|            | 0.228519929638341 |   |                      |
| WDR7       | 1.92653278182727  | 2 | 0.381644248510677    |
|            | 1.46732258339852  |   |                      |
| FECH       | 4.10187547064091  | 2 | 0.128614240905406    |
|            | 0.778695040813668 |   |                      |
| NARS       | 2.6746899354443   | 2 | 0.262541801000314    |
|            | 0.272189777301086 |   |                      |
| AC027097.1 | 8.61508546395401  | 2 | 0.0134666000163409   |
|            | 0.938395255713177 |   |                      |
| NEDD4L     | 10.4514559129641  | 2 | 0.0053764447172383   |
|            | 1.37027914195599  |   |                      |
| AC104971.3 | 3.94544421109484  | 2 | 0.139077756142417    |
|            | 2.34170606045116  |   |                      |
| MALT1      | 6.22936547475421  | 2 | 0.0443925890227745   |
|            | 0.281911321754438 |   |                      |
| ZNF532     | 5.22773350536992  | 2 | 0.0732507528966693   |
|            | 1.06290582097329  |   |                      |
| SEC11C     | 45.3419322241604  | 2 | 1.42601597197256e-10 |
|            | 0.417758198358156 |   |                      |
| LMAN1      | 2.71397470479434  | 2 | 0.257435171330965    |
|            | 0.194021173118132 |   |                      |
| PMAIP1     | 10.8884264508721  | 2 | 0.00432123851107502  |
|            | 0.309596066009307 |   |                      |
| PIGN       | 2.34144151961004  | 2 | 0.310143321847039    |
|            | 0.436866248956984 |   |                      |
| KIAA1468   | 3.63212564364014  | 2 | 0.162664932645506    |
|            | 1.30758261357858  |   |                      |
| ZCCHC2     | 0.29953962976874  | 2 | 0.860906121394271    |
|            | 0.365888327749432 |   |                      |
| PHLPP1     | 0.800708118557019 | 2 | 0.670082755013792    |
|            | 0.476187513690555 |   |                      |
| BCL2       | 5.33124170292307  | 2 | 0.0695561560838932   |
|            | 1.05930615051937  |   |                      |
| KDSR       | 6.16756845842223  | 2 | 0.0457856649500592   |
|            | 1.03918056277131  |   |                      |

|                    |                     |   |                      |
|--------------------|---------------------|---|----------------------|
| AC036176.1         | 4.21790243230502    | 2 | 0.121365185555298    |
| 1.70523932656658   |                     |   |                      |
| VPS4B              | 0.0310758644900662  | 2 | 0.984582158631692    |
| 0.0270081797733314 |                     |   |                      |
| SERPINB8           | 0.656985427701422   | 2 | 0.720008174293756    |
| 0.218631481697011  |                     |   |                      |
| TMX3               | 3.28773950220703    | 2 | 0.193230838359489    |
| 0.540163957462166  |                     |   |                      |
| RTTN               | 0.0411995361468229  | 2 | 0.979610957701052    |
| 0.145420196645026  |                     |   |                      |
| CBLN2              | 15.2846496879534    | 2 | 0.000479711899336155 |
| 4.22716390714751   |                     |   |                      |
| TIMM21             | 3.1202915866818     | 2 | 0.210105436994087    |
| 0.70558668945838   |                     |   |                      |
| CYB5A              | 8.18101403491858    | 2 | 0.0167307486260976   |
| 0.303836116250888  |                     |   |                      |
| CNDP2              | 0.0437363038415472  | 2 | 0.97836922265042     |
| 0.0244431317706757 |                     |   |                      |
| LINC00909          | 1.33571675573284    | 2 | 0.512805638528145    |
| 0.340519078956274  |                     |   |                      |
| ZNF407             | 2.06405445374428    | 2 | 0.356283959556288    |
| 0.709811065385549  |                     |   |                      |
| ZADH2              | 0.236941047022121   | 2 | 0.888277998587513    |
| 0.287605682046284  |                     |   |                      |
| ZNF516             | 3.32177483985783    | 2 | 0.18997032182774     |
| ZNF236-DT          | 0.0114932521274289  | 2 | 4.96331504280105     |
| 0.187548327431591  |                     |   | 0.994269854208079    |
| AC027575.2         | 0.0196951855028812  | 2 | 0.990200736019274    |
| 0.18473185985564   |                     |   |                      |
| ZNF236             | 3.042122195754      | 2 | 0.218479935316753    |
| 0.8964434656859    |                     |   |                      |
| MBP                | 1.16444653180764    | 2 | 0.558654946356465    |
| 0.2226075408627    |                     |   |                      |
| ATP9B              | 1.25881484023087    | 2 | 0.532907497723382    |
| 0.624426664524708  |                     |   |                      |
| NFATC1             | 5.97105216213863    | 2 | 0.0505129226655276   |
| 0.314229757995319  |                     |   |                      |
| CTDP1              | 1.25273452430969    | 2 | 0.534530085907298    |
| 0.37079979346277   |                     |   |                      |
| PQLC1              | 3.11572547685154    | 2 | 0.210585667232121    |
| 0.632195275118347  |                     |   |                      |
| HSBP1L1            | 0.00504244473501802 | 2 | 0.997481953244236    |
| 0.0416101566809502 |                     |   |                      |
| TXNL4A             | 0.172734700266771   | 2 | 0.917257214762229    |
| 0.0481694560244422 |                     |   |                      |
| RBFA               | 0.029197746487823   | 2 | 0.985507173623951    |
| 0.050655560715789  |                     |   |                      |
| ADNP2              | 1.88419797265348    | 2 | 0.389808772774557    |
| 8.93336021404822   |                     |   |                      |
| C20orf96           | 6.14756671563822    | 2 | 0.0462458588311211   |

|                     |                        |                      |
|---------------------|------------------------|----------------------|
| 1.42336503700237    |                        |                      |
| ZCCHC3              | 1.84099600496549 2     | 0.398320627022082    |
| 0.442603027472444   |                        |                      |
| NRSN2-AS1           | 1.04473838916627 2     | 0.59311368033804     |
| 1.00632152103525    |                        |                      |
| SOX12               | 2.30157504048309 2     | 0.316387509675363    |
| 2.41284089911925    |                        |                      |
| NRSN2               | 1.01163613846322 2     | 0.603012067973832    |
| 0.773683173932208   |                        |                      |
| TRIB3               | 0.000223673038570754 2 | 0.999888169734185    |
| 0.00564871774477396 |                        |                      |
| RBCK1               | 1.47723220703012 2     | 0.477774648879476    |
| 0.125647172644305   |                        |                      |
| TBC1D20             | 4.26085909044316 2     | 0.118786258822401    |
| 0.529513185769236   |                        |                      |
| CSNK2A1             | 3.50690025980109 2     | 0.173175433833864    |
| 0.322593723891908   |                        |                      |
| FAM110A             | 2.22165768384968 2     | 0.329285921960306    |
| 0.291542646079036   |                        |                      |
| PSMF1               | 1.08110464067116 2     | 0.582426477533254    |
| 0.131583268783148   |                        |                      |
| SDCBP2              | 2.22724811189343 2     | 0.328366782528205    |
| 1.39403700436482    |                        |                      |
| SDCBP2-AS1          | 5.75638563823359 2     | 0.0562363002249924   |
| 1.85862883285061    |                        |                      |
| FKBP1A              | 21.1753955423476 2     | 2.52244253949874e-05 |
| 0.30372710493429    |                        |                      |
| NSFL1C              | 1.72274872111762 2     | 0.422580904507237    |
| 0.157475035581727   |                        |                      |
| STK35               | 16.5555867754379 2     | 0.000254097276042087 |
| 1.26544650584993    |                        |                      |
| SNRPB               | 0.185591453511942 2    | 0.911379651760619    |
| 0.0328656333361953  |                        |                      |
| ZNF343              | 0.277869156271941 2    | 0.870284962260341    |
| 0.379035804229907   |                        |                      |
| NOP56               | 0.452290785288017 2    | 0.797602127752781    |
| 0.0914255555364666  |                        |                      |
| IDH3B               | 0.346713806490171 2    | 0.840837463665973    |
| 0.067043591085756   |                        |                      |
| CPXM1               | 3.14227086361488 2     | 0.207809095295331    |
| 1.34561510247767    |                        |                      |
| PCED1A              | 0.840791135284229 2    | 0.656786964752299    |
| 0.701949607063208   |                        |                      |
| VPS16               | 3.67867178925963 2     | 0.158922932642328    |
| 0.573338944910429   |                        |                      |
| PTPRA               | 3.81596700480031 2     | 0.148379291608952    |
| 0.408503903381009   |                        |                      |
| MRPS26              | 2.88994376059845 2     | 0.235752705758201    |
| 0.26438506602342    |                        |                      |
| UBOX5               | 1.79184397206661 2     | 0.408231041758567    |

|                               |   |                                    |
|-------------------------------|---|------------------------------------|
| 0.707061598732487             |   |                                    |
| FASTKD5 2.44951594094544 2    |   | 0.293828806965484                  |
| 0.289113100423296             |   |                                    |
| DDRK1 0.624452625035335       | 2 | 0.731815890389438                  |
| 0.141838217077232             |   |                                    |
| ITPA 1.39580547972024 2       |   | 0.497627865234237                  |
| 0.166724259639345             |   |                                    |
| C2orf27 3.63498033624901 2    |   | 0.162432919076279                  |
| 0.568247279656619             |   |                                    |
| CENPB 0.000683112645520664    | 2 | 0.99965850200096                   |
| 0.0158101789355045            |   |                                    |
| CDC25B 7.24544412315159 2     |   | 0.0267098715328071                 |
| 0.754616643917022             |   |                                    |
| AP5S1 2.70317740035864 2      |   | 0.258828732581229                  |
| 0.520108050927196             |   |                                    |
| MAVS 1.87807404086217 2       |   | 0.39100418316156 0.275681974227041 |
| AL353194.1 4.16162823486241 2 |   | 0.124828545724987                  |
| 0.902035744167111             |   |                                    |
| PANK2 5.0442407226721 2       |   | 0.0802891840529661                 |
| 0.390310112649233             |   |                                    |
| RNF24 3.39718365892554 2      |   | 0.182940954819614                  |
| 1.43057539964017              |   |                                    |
| PRNP 0.0358619465989835       | 2 | 0.98222883003363                   |
| 0.0621001292371271            |   |                                    |
| RASSF2 13.9489811419202 2     |   | 0.000935442787776353               |
| 1.21769463305452              |   |                                    |
| SLC23A2 1.27352762323934 2    |   | 0.529001605784143                  |
| 0.570323354113512             |   |                                    |
| TMEM230 0.536647422720113     | 2 | 0.764660211837379                  |
| 0.0912530182611947            |   |                                    |
| PCNA 1.54968549312979 2       |   | 0.460776233947681                  |
| 0.273405583634053             |   |                                    |
| CDS2 0.0972793024378186       | 2 | 0.952524308836348                  |
| 0.0751883920233597            |   |                                    |
| GPCPD1 2.63549983160674 2     |   | 0.267737055631489                  |
| 0.377647272620581             |   |                                    |
| SHLD1 0.00593579789568856     | 2 | 0.997036500910384                  |
| 0.0144781550762157            |   |                                    |
| TRMT6 0.0762000120789589      | 2 | 0.962616668596811                  |
| 0.058842052642263             |   |                                    |
| MCM8 2.55971558142447 2       |   | 0.278076842751239                  |
| 1.3782786843486               |   |                                    |
| CRLS1 5.18554732247482 2      |   | 0.0748122482134588                 |
| 0.354144420324058             |   |                                    |
| TMX4 1.38351552036365 2       |   | 0.500695193034907                  |
| 0.15000765208889              |   |                                    |
| MKKS 0.0254170144001376       | 2 | 0.987371904877955                  |
| 0.0622945744354572            |   |                                    |
| SLX4IP 1.18587066621273 2     |   | 0.552702535260919                  |
| 0.311153693782664             |   |                                    |

|            |                    |   |                      |
|------------|--------------------|---|----------------------|
| TASP1      | 0.0222701266212976 | 2 | 0.988926702040547    |
|            | 0.0559018472961276 |   |                      |
| ESF1       | 0.171513420418917  | 2 | 0.917817499686835    |
|            | 0.0865204452555986 |   |                      |
| NDUFAF5    | 0.736567864296525  | 2 | 0.69192069526621     |
|            | 0.359306460621477  |   |                      |
| MACROD2    | 0.708043717610656  | 2 | 0.701859625374798    |
|            | 0.543787292544471  |   |                      |
| KIF16B     | 2.31001335193301   | 2 | 0.31505543359687     |
|            | 0.789065687994227  |   |                      |
| SNRPB2     | 0.760348813315452  | 2 | 0.683742149629762    |
|            | 0.0630468252853406 |   |                      |
| DSTN       | 13.4394674011309   | 2 | 0.00120685955718702  |
|            | 0.49080073771645   |   |                      |
| RRBP1      | 25.7000233901128   | 2 | 2.626097392322e-06   |
|            | 0.625045966079475  |   |                      |
| SNX5       | 16.6766527273334   | 2 | 0.000239172295599777 |
|            | 0.467558021950315  |   |                      |
| MGME1      | 5.64261402464808   | 2 | 0.0595280878969154   |
|            | 0.443732405102624  |   |                      |
| PET117     | 0.178985276187295  | 2 | 0.914394996789861    |
|            | 0.14395818723124   |   |                      |
| KAT14      | 3.71047634944541   | 2 | 0.156415683975933    |
|            | 1.30687230994467   |   |                      |
| ZNF133     | 1.36571089974569   | 2 | 0.505172436349331    |
|            | 0.89192396092473   |   |                      |
| DZANK1     | 3.24084626850502   | 2 | 0.197814979079155    |
|            | 5.54585692489851   |   |                      |
| POLR3F     | 0.982193575361093  | 2 | 0.611954841445203    |
|            | 0.41556485439715   |   |                      |
| RBBP9      | 0.111097752511786  | 2 | 0.945965787274628    |
|            | 0.118494943484893  |   |                      |
| SEC23B     | 1.96211596429896   | 2 | 0.374914236382035    |
|            | 0.345376030946027  |   |                      |
| SMIM26     | 1.4160143981562    | 2 | 0.492624923342074    |
|            | 0.117492195368197  |   |                      |
| DTD1       | 1.61522050135713   | 2 | 0.445922436767684    |
|            | 0.282957878822635  |   |                      |
| AL035563.1 | 0.0262466646293818 | 2 | 0.986962403156011    |
|            | 0.11176104260028   |   |                      |
| NAA20      | 1.43426621799084   | 2 | 0.488149723860963    |
|            | 0.165511595974753  |   |                      |
| CRNKL1     | 1.71841166134355   | 2 | 0.423498278144931    |
|            | 0.346683313877121  |   |                      |
| RALGAPA2   | 0.874740180464174  | 2 | 0.645732407926509    |
|            | 0.379010762399961  |   |                      |
| KIZ        | 0.144277863294776  | 2 | 0.930401624601044    |
|            | 0.143619219154111  |   |                      |
| AL117332.1 | 0.0324294114198559 | 2 | 0.983916044982167    |
|            | 0.104444073597896  |   |                      |
| XRN2       | 1.12377419452677   | 2 | 0.570132153224737    |

|                    |                    |   |                      |
|--------------------|--------------------|---|----------------------|
| 0.0887760442861224 |                    |   |                      |
| NXT1               | 0.120111985985168  | 2 | 0.941711802845994    |
| 0.0775761319073212 |                    |   |                      |
| LINC01431          | 0.0465401079185886 | 2 | 0.976998605802513    |
| 0.146272520439584  |                    |   |                      |
| GZF1               | 5.14333839951527   | 2 | 0.0764078988734725   |
| 2.11052866253981   |                    |   |                      |
| NAPB               | 8.94935346793654   | 2 | 0.0113939047916286   |
| 0.656688393694202  |                    |   |                      |
| APMAP              | 1.38726898775303   | 2 | 0.49975640270064     |
| ACSS1              | 9.16569276349209   | 2 | 0.295889719709239    |
| 0.724514614731077  |                    |   | 0.0102257484494076   |
| ENTPD6             | 1.11910409570556   | 2 | 0.571464995493763    |
| 0.515164797907196  |                    |   |                      |
| PYGB               | 0.237937414308398  | 2 | 0.887835583229254    |
| 0.216467051433807  |                    |   |                      |
| ABHD12             | 17.9162619059095   | 2 | 0.00012868655031828  |
| 1.29726026868894   |                    |   |                      |
| NANP               | 1.46726806267341   | 2 | 0.480160895957009    |
| 1.23636266570626   |                    |   |                      |
| ZNF337-AS1         | 2.0387619392625    | 2 | 0.360818228495858    |
| 1.66579712351027   |                    |   |                      |
| ZNF337             | 0.0196549664746599 | 2 | 0.990220648675164    |
| 0.105595697134332  |                    |   |                      |
| LINC01597          | 0.571228060410167  | 2 | 0.751552636590695    |
| 0.382438934657151  |                    |   |                      |
| HM13               | 16.9221498925149   | 2 | 0.000211544549387321 |
| 0.410511376815594  |                    |   |                      |
| BCL2L1             | 0.0175280032546032 | 2 | 0.991274290289835    |
| 0.0455300894155646 |                    |   |                      |
| TPX2               | 3.92562470014755   | 2 | 0.140462834255405    |
| 0.796178327203071  |                    |   |                      |
| PDRG1              | 0.0320491717334733 | 2 | 0.984103124729575    |
| 0.0359045952508455 |                    |   |                      |
| HCK                | 2.15296292606289   | 2 | 0.340792509637593    |
| 0.387564889567255  |                    |   |                      |
| TM9SF4             | 2.3604325604761    | 2 | 0.307212287468692    |
| 0.64998821698669   |                    |   |                      |
| PLAGL2             | 1.51567733265398   | 2 | 0.468678303313603    |
| 0.683638806439585  |                    |   |                      |
| POFUT1             | 0.342105952502018  | 2 | 0.842776925127049    |
| 0.41648597558842   |                    |   |                      |
| KIF3B              | 1.26635188470924   | 2 | 0.530903003329911    |
| 0.348439541001925  |                    |   |                      |
| ASXL1              | 0.0139544924924853 | 2 | 0.993047038223947    |
| 0.0283686254421267 |                    |   |                      |
| COMMD7             | 7.23470787841163   | 2 | 0.0268536389269218   |
| 0.343394697729826  |                    |   |                      |
| MAPRE1             | 0.405254700169322  | 2 | 0.816582484127658    |
| 0.0352009679117483 |                    |   |                      |

|            |                    |   |                      |
|------------|--------------------|---|----------------------|
| AL035071.1 | 0.0368335625371188 | 2 | 0.981751771329395    |
|            | 0.106780132578147  |   |                      |
| CDK5RAP1   | 0.0516086242110335 | 2 | 0.974525773847646    |
|            | 0.0490283658009894 |   |                      |
| SNTA1      | 11.5382319650385   | 2 | 0.00312251665372731  |
|            | 0.452920881648059  |   |                      |
| CBFA2T2    | 0.71539770110052   | 2 | 0.699283632181389    |
|            | 0.330157901976055  |   |                      |
| NECAB3     | 1.65767188203535   | 2 | 0.436557168955336    |
|            | 0.417413690242129  |   |                      |
| ACTL10     | 4.14665807729818   | 2 | 0.125766402812362    |
|            | 1.16331609015412   |   |                      |
| E2F1       | 7.95730488055004   | 2 | 0.0187108363261502   |
|            | 1.08747257952215   |   |                      |
| PXMP4      | 4.07671386059472   | 2 | 0.130242532727741    |
|            | 0.444880002936849  |   |                      |
| ZNF341     | 1.50303005938708   | 2 | 0.471651445228719    |
|            | 1.64789234851      |   |                      |
| CHMP4B     | 2.15841969503297   | 2 | 0.339863963932542    |
|            | 0.169781816904814  |   |                      |
| AL034549.1 | 1.07758430425929   | 2 | 0.583452548865455    |
|            | 0.592267430564813  |   |                      |
| RALY       | 0.569422450268382  | 2 | 0.75223144849336     |
|            | 0.0749957697644325 |   |                      |
| EIF2S2     | 4.69426215418552   | 2 | 0.0956431618436444   |
|            | 0.184721576976739  |   |                      |
| AHCY       | 0.0252562879218451 | 2 | 0.987451256470906    |
|            | 0.0292459568368733 |   |                      |
| ITCH       | 5.4531366581712    | 2 | 0.0654434852702854   |
|            | 0.525854653899792  |   |                      |
| DYNLRB1    | 0.737870890056551  | 2 | 0.691470046838865    |
|            | 0.0970335479168182 |   |                      |
| MAP1LC3A   | 1.42468956842855   | 2 | 0.490492748385084    |
|            | 0.49940917704017   |   |                      |
| PIGU       | 0.44604855632526   | 2 | 0.800095424211924    |
|            | 0.208204178490805  |   |                      |
| NCOA6      | 0.169507421241215  | 2 | 0.918738532082004    |
|            | 0.191450805256415  |   |                      |
| TP53INP2   | 1.5532087766871    | 2 | 0.459965225845964    |
|            | 0.697921096056244  |   |                      |
| GSS        | 27.46957011105     | 2 | 1.08407328025528e-06 |
|            | 0.700545609838587  |   |                      |
| TRPC4AP    | 1.3856100994823    | 2 | 0.50017109467611     |
|            | 0.8324501452287    |   | 0.12624414839026     |
| EDEM2      | 11.1704753080585   | 2 | 0.00375285778200907  |
|            | 0.8324501452287    |   |                      |
| MMP240S    | 1.19555638871606   | 2 | 0.550032344469696    |
|            | 0.217033591352077  |   |                      |
| EIF6       | 0.380203269688457  | 2 | 0.826875090351552    |
|            | 0.0599884844192384 |   |                      |
| UQCC1      | 1.04663021566174   | 2 | 0.592552911511537    |

|                    |                     |   |                      |
|--------------------|---------------------|---|----------------------|
| 0.290376485001314  |                     |   |                      |
| CEP250             | 3.45587790249641    | 2 | 0.177650178585754    |
| 0.77542236421026   |                     |   |                      |
| F0393401.1         | 0.661839204217215   | 2 | 0.718262913542985    |
| 0.206453709072285  |                     |   |                      |
| ERGIC3             | 0.100867391789343   | 2 | 0.95081696965087     |
| 0.0374556077487227 |                     |   |                      |
| CPNE1              | 1.34364483801609    | 2 | 0.510776879577931    |
| 0.0830207395104249 |                     |   |                      |
| RBM12              | 0.615291202023135   | 2 | 0.735175817411991    |
| 0.261102273853592  |                     |   |                      |
| NFS1               | 0.914502345269669   | 2 | 0.633021322459692    |
| 0.581245440772985  |                     |   |                      |
| ROM01              | 8.71509423773892    | 2 | 0.0128097699883187   |
| 0.229198088693775  |                     |   |                      |
| RBM39              | 1.3617662369481     | 2 | 0.506169787037072    |
| 0.0814047880651664 |                     |   |                      |
| PHF20              | 7.25574704425403    | 2 | 0.0265726304827089   |
| 0.504153606683905  |                     |   |                      |
| SCAND1             | 0.442620881864169   | 2 | 0.801467833244851    |
| 0.0609732454341884 |                     |   |                      |
| CNBD2              | 3.25250204068413    | 2 | 0.196665488717183    |
| 0.658916232874218  |                     |   |                      |
| NORAD              | 0.473003195527741   | 2 | 0.789384621050734    |
| 0.215485596122562  |                     |   |                      |
| AAR2               | 0.00204934820124522 | 2 | 0.998975850698619    |
| 0.0116736564006747 |                     |   |                      |
| DLGAP4             | 7.65993866374005    | 2 | 0.0217102814333718   |
| 1.66327690111954   |                     |   |                      |
| TGIF2              | 0.0286361805279074  | 2 | 0.985783926116807    |
| 0.0621377039290445 |                     |   |                      |
| RAB5IF             | 2.82535980073204    | 2 | 0.243489879399087    |
| 0.196991869289642  |                     |   |                      |
| NDRG3              | 3.13131612869882    | 2 | 0.20895046506864     |
| 0.85521454483402   |                     |   |                      |
| DSN1               | 0.3559382449853     | 2 | 0.836968266583584    |
| 0.247912250619461  |                     |   |                      |
| SOGA1              | 1.54846017428309    | 2 | 0.46105861934367     |
| 0.565128504262262  |                     |   |                      |
| SAMHD1             | 1.4025567228861     | 2 | 0.495950893874841    |
| 0.247941505153841  |                     |   |                      |
| RBL1               | 4.76063020915801    | 2 | 0.0925214189938126   |
| 1.94760449288533   |                     |   |                      |
| MROH8              | 2.70683892393753    | 2 | 0.258355312319701    |
| 1.13922860631503   |                     |   |                      |
| RPN2               | 5.78839371538221    | 2 | 0.0553434559211354   |
| 0.157336957585205  |                     |   |                      |
| MANBAL             | 1.68638474316176    | 2 | 0.430334540515872    |
| 0.427257764764818  |                     |   |                      |
| SRC                | 16.6142373853706    | 2 | 0.000246753994166071 |
| 3.23719682028114   |                     |   |                      |
| BLCAP              | 14.331177935832     | 2 | 0.000772723733929004 |



|                              |   |                                    |
|------------------------------|---|------------------------------------|
| 0.473810808765848            |   |                                    |
| CTNNBL1 8.09407821851507e-05 | 2 | 0.999959530427823                  |
| 0.00111961491038788          |   |                                    |
| TTI1 0.0465383960057273      | 2 | 0.976999442071111                  |
| 0.0914071812770804           |   |                                    |
| RPRD1B 15.1894901124642 2    |   | 0.000503088199543034               |
| 0.616876055511083            |   |                                    |
| TGM2 2.08135112608028 2      |   | 0.353215981676906                  |
| 1.18336719581385             |   |                                    |
| RALGAPB 0.677526487512226    | 2 | 0.712651153727824                  |
| 0.376719945197426            |   |                                    |
| ACTR5 0.496458561528528      | 2 | 0.780181042263903                  |
| 0.112931909013318            |   |                                    |
| PPP1R16B 2.30934321936834 2  |   | 0.315161015737255                  |
| 0.811712648316281            |   |                                    |
| FAM83D 0.000299452351968447  | 2 | 0.99985028503242                   |
| 0.0164168711400846           |   |                                    |
| DHX35 0.00276603884351066    | 2 | 0.998617936508864                  |
| 0.0437766177558033           |   |                                    |
| TOP1 14.0146933086104 2      |   | 0.000905207232486105               |
| 0.388809592396129            |   |                                    |
| PLCG1 3.15701772012539 2     |   | 0.206282465006411                  |
| 2.67261341717982             |   |                                    |
| ZHX3 0.305085222341774       | 2 | 0.858522310536084                  |
| 0.476221580039929            |   |                                    |
| CHD6 1.46143102068722 2      |   | 0.48156430255157 0.285361473084037 |
| SRSF6 0.0732420505734405     | 2 | 0.964041413447351                  |
| 0.040776473717834            |   |                                    |
| L3MBTL1 1.34497364871432 2   |   | 0.510437629399232                  |
| 0.885043466286024            |   |                                    |
| IFT52 1.39987247624357 2     |   | 0.496616968012548                  |
| 0.244802844234554            |   |                                    |
| MYBL2 11.2420962700556 2     |   | 0.00362084398595264                |
| 0.437094027345058            |   |                                    |
| OSER1 3.31941617263619 2     |   | 0.190194492373277                  |
| 0.241316422806132            |   |                                    |
| OSER1-DT 0.337344867429111   | 2 | 0.844785581343253                  |
| 0.335248741886118            |   |                                    |
| TTPAL 1.70285539963099 2     |   | 0.42680514712766 0.316642834162589 |
| SERINC3 2.76197814709769 2   |   | 0.251329846382341                  |
| 0.327848745149148            |   |                                    |
| PKIG 1.31664671522603 2      |   | 0.517718636221123                  |
| 0.179540800708283            |   |                                    |
| ADA 0.130906492122838        | 2 | 0.936642837477621                  |
| 0.0399805659339751           |   |                                    |
| YWHAB 4.60753165556599 2     |   | 0.0998819962004102                 |
| 0.0809393101919868           |   |                                    |
| PABPC1L 1.24143539249394 2   |   | 0.537558495401933                  |
| 0.845257919889489            |   |                                    |
| TOMM34 1.67279243111099 2    |   | 0.433269121837464                  |

|                              |   |                      |
|------------------------------|---|----------------------|
| 0.396479599641575            |   |                      |
| STK4 1.78401588185102 2      |   | 0.409832007552713    |
| 0.136406822658351            |   |                      |
| SYS1 3.49838762393955 2      |   | 0.173914094410042    |
| 0.484158773545065            |   |                      |
| PIGT 9.04527350509791 2      |   | 0.0108603498271658   |
| 0.596228667198792            |   |                      |
| DNTTIP1 0.365962027017198    | 2 | 0.832783967232621    |
| 0.0863626867718451           |   |                      |
| UBE2C 0.570534982007327      | 2 | 0.751813124173177    |
| 0.419229573385007            |   |                      |
| TNNC2 0.730187579547902      | 2 | 0.694131545384178    |
| 0.44614846056607             |   |                      |
| ACOT8 0.893452373782923      | 2 | 0.639719047757021    |
| 0.102749107549975            |   |                      |
| ZSWIM3 3.4079573167238 2     |   | 0.181958132721219    |
| 1.18909736362531             |   |                      |
| ZSWIM1 3.3446178138716 2     |   | 0.187812922074662    |
| 1.64766355459642             |   |                      |
| CTSA 5.29539819776562 2      |   | 0.0708139616779278   |
| 0.591246473542486            |   |                      |
| PLTP 4.57695090705982 2      |   | 0.101420965024548    |
| 1.57264734514142             |   |                      |
| PCIF1 0.065365140975442      | 2 | 0.967845733632588    |
| 0.0565646607188911           |   |                      |
| ZNF335 0.0126062299969283    | 2 | 0.993716707960214    |
| 0.0430383599680564           |   |                      |
| SLC12A5 1.80600669859617 2   |   | 0.405350420854993    |
| 1.35799957632279             |   |                      |
| NCOA5 0.0174908667375448     | 2 | 0.991292696698018    |
| 0.058881277145398            |   |                      |
| CD40 7.86802893246926 2      |   | 0.019564971769391    |
| 0.147741480149365            |   |                      |
| SLC35C2 4.08064166895416 2   |   | 0.129986999876488    |
| 0.374090138099464            |   |                      |
| ELM02 0.846433239710014      | 2 | 0.654936745441682    |
| 0.375879807637965            |   |                      |
| TP53RK 0.0232894388041242    | 2 | 0.988422817937599    |
| 0.0294129922972218           |   |                      |
| EYA2 0.960760676844464       | 2 | 0.618548089457296    |
| 0.925132612628901            |   |                      |
| ZMYND8 0.555413061776748     | 2 | 0.757519097353734    |
| 0.163888512774018            |   |                      |
| LINC01754 3.08329056201707 2 |   | 0.214028674272564    |
| 0.72125149598723             |   |                      |
| NCOA3 35.2488074389886 2     |   | 2.21727070037758e-08 |
| 0.61039598719236             |   |                      |
| SULF2 26.2234273721191 2     |   | 2.0214132022689e-06  |
| 0.893568375406893            |   |                      |
| ARFGEF2 1.06305426248714 2   |   | 0.587706778641395    |

|                             |   |                      |
|-----------------------------|---|----------------------|
| 0.357849951273298           |   |                      |
| CSE1L 0.534812309966494     | 2 | 0.765362152676742    |
| 0.175759239233754           |   |                      |
| STAU1 3.37046821350972 2    |   | 0.185401023243133    |
| 0.32438389848274            |   |                      |
| DDX27 1.39167407930892 2    |   | 0.498656877667481    |
| 0.145678115546225           |   |                      |
| ZNFX1 0.153855875481141     | 2 | 0.925956577725445    |
| 0.142489809988398           |   |                      |
| ZFAS1 87.6208343263807 2    | 0 | 0.524551435064168    |
| B4GALT5 2.14822383450462 2  |   | 0.341600990578382    |
| 1.2850289952408             |   |                      |
| SLC9A8 0.552565615443829    | 2 | 0.758598362947081    |
| 0.484324709114097           |   |                      |
| SPATA2 0.00797327411035252  | 2 | 0.996021299032725    |
| 0.0390888036472145          |   |                      |
| RNF114 10.7819783341465 2   |   | 0.0045574630130214   |
| 0.550358594760824           |   |                      |
| UBE2V1 0.598535138434346    | 2 | 0.741361017507311    |
| 0.392903860785225           |   |                      |
| TMEM189 0.75927855114259 2  |   | 0.684108139226604    |
| 0.361051651031532           |   |                      |
| CEBPB 0.0390286887567683    | 2 | 0.98067482791697     |
| 0.0501691834347444          |   |                      |
| PTPN1 44.138478096459 2     |   | 2.60286237008245e-10 |
| 0.651584318011899           |   |                      |
| BCAS4 6.36769484727174 2    |   | 0.0414259648837306   |
| 0.175624461147841           |   |                      |
| ADNP 0.366538803961224      | 2 | 0.832543836563916    |
| 0.197359975418103           |   |                      |
| ADNP-AS1 2.04952333654169 2 |   | 0.358881988178957    |
| 0.699283259043587           |   |                      |
| DPM1 15.7819761438886 2     |   | 0.000374099754839596 |
| 0.482750308750556           |   |                      |
| MOCS3 4.34180738934801 2    |   | 0.114074481814881    |
| 0.732186516367391           |   |                      |
| KCNG1 0.124016920439264     | 2 | 0.939874935209074    |
| 0.458034105046571           |   |                      |
| NFATC2 5.75648427424119 2   |   | 0.0562335268313139   |
| 0.652038746917194           |   |                      |
| ZFP64 0.0589299816508196    | 2 | 0.970964869724819    |
| 0.108186728481622           |   |                      |
| TSHZ2 19.4207272497327 2    |   | 6.06516556286296e-05 |
| 1.45435391178516            |   |                      |
| ZNF217 0.555159628621039    | 2 | 0.757615093663444    |
| 0.295974888027956           |   |                      |
| BCAS1 1.85627912101601 2    |   | 0.395288436921313    |
| 1.34650069585635            |   |                      |
| PFDN4 20.6029631468753 2    |   | 3.35833021803955e-05 |
| 0.494869558736174           |   |                      |

|            |                    |   |                      |
|------------|--------------------|---|----------------------|
| AURKA      | 0.382034401238335  | 2 | 0.826118378281373    |
|            | 0.258972816424057  |   |                      |
| CSTF1      | 0.211793123918123  | 2 | 0.899517687611323    |
|            | 0.107715797928402  |   |                      |
| RTF2       | 1.23418330886496   | 2 | 0.53951124321702     |
| BMP7       | 16.8167590973022   | 2 | 0.114913337687817    |
|            | 2.27749923599562   |   | 0.000222990910226484 |
| RAE1       | 0.0998363560732701 | 2 | 0.951307259144085    |
|            | 0.0462031741826533 |   |                      |
| AL109955.1 | 0.991724817690392  | 2 | 0.609045434572813    |
|            | 0.52622540627679   |   |                      |
| RBM38      | 34.6087462046066   | 2 | 3.05355852825429e-08 |
|            | 0.792783147722788  |   |                      |
| ZBP1       | 23.5370605871719   | 2 | 7.74447948004298e-06 |
|            | 1.50116884464487   |   |                      |
| PMEPA1     | 12.6596819682015   | 2 | 0.00178231716333532  |
|            | 2.42034223042124   |   |                      |
| RAB22A     | 1.73406587666575   | 2 | 0.420196450265554    |
|            | 0.295677923005959  |   |                      |
| VAPB       | 0.900723189261634  | 2 | 0.637397630385822    |
|            | 0.240779331855804  |   |                      |
| STX16      | 0.743794727568434  | 2 | 0.689424998866028    |
|            | 0.13397533211272   |   |                      |
| NPEPL1     | 0.487079409037581  | 2 | 0.783848353092752    |
|            | 0.41388556442306   |   |                      |
| GNAS       | 7.0289721370648    | 2 | 0.0297630952153781   |
|            | 0.253249245560452  |   |                      |
| NELFCD     | 0.275745199797575  | 2 | 0.871209676876901    |
|            | 0.0734522630144716 |   |                      |
| CTSZ       | 8.57238653293456   | 2 | 0.0137571957227265   |
|            | 0.322189109035914  |   |                      |
| ATP5F1E    | 88.1130639292089   | 2 | 0.392014676783722    |
| PRELID3B   | 9.03983452436494   | 2 | 0.0108899246398795   |
|            | 0.498171558087086  |   |                      |
| ZNF831     | 14.6371823291661   | 2 | 0.000663095746231357 |
|            | 2.19924525205828   |   |                      |
| FAM217B    | 0.171051396728856  | 2 | 0.918029550893066    |
|            | 0.137236295856878  |   |                      |
| PPP1R3D    | 0.210795993270785  | 2 | 0.899966267752353    |
|            | 0.295146703318875  |   |                      |
| TAF4       | 0.58016647387667   | 2 | 0.748201287002191    |
|            | 0.725674147531185  |   |                      |
| LSM14B     | 1.51474160712686   | 2 | 0.468897631743613    |
|            | 0.305484995152344  |   |                      |
| PSMA7      | 4.41799812719045   | 2 | 0.109810506859674    |
|            | 0.0899401060672036 |   |                      |
| SS18L1     | 0.182524980341836  | 2 | 0.912778084175487    |
|            | 0.271024133581472  |   |                      |
| MTG2       | 0.334387085866183  | 2 | 0.846035851230246    |
|            | 0.212992448332266  |   |                      |

|            |                    |   |                      |
|------------|--------------------|---|----------------------|
| OSBPL2     | 0.992684931206267  | 2 | 0.608753128363455    |
|            | 0.25924930444636   |   |                      |
| ADRM1      | 0.480023614812831  | 2 | 0.786618573086534    |
|            | 0.0240168890180352 |   |                      |
| LAMA5      | 0.802850814182996  | 2 | 0.669365247738241    |
|            | 0.723347283516658  |   |                      |
| AL121832.2 | 1.92429887999631   | 2 | 0.382070764557841    |
|            | 1.78193130991736   |   |                      |
| RPS21      | 61.8153181072346   | 2 | 3.77475828372553e-14 |
|            | 0.370065098083417  |   |                      |
| SLC04A1    | 24.8778982879568   | 2 | 3.96125705881545e-06 |
|            | 1.25690711814447   |   |                      |
| AL357033.4 | 0.0313614607075912 | 2 | 0.984441572199495    |
|            | 0.100068328882442  |   |                      |
| MRGBP      | 2.67279127959491   | 2 | 0.262791157605269    |
|            | 0.432367958695491  |   |                      |
| OGFR       | 8.01508809819717   | 2 | 0.0181779846975292   |
|            | 0.24544590622369   |   |                      |
| COL9A3     | 44.533105374153    | 2 | 2.13677631144549e-10 |
|            | 2.49432555285113   |   |                      |
| TCFL5      | 0.751798988322459  | 2 | 0.686671344053632    |
|            | 0.483271359179354  |   |                      |
| DID01      | 0.0872199170082022 | 2 | 0.957327282027427    |
|            | 0.0873251757298961 |   |                      |
| GID8       | 2.5359505167017    | 2 | 0.281400809293775    |
|            | 0.170472062403387  |   |                      |
| SLC17A9    | 8.78814742051033   | 2 | 0.0123503149988314   |
|            | 1.40968866433172   |   |                      |
| YTHDF1     | 0.203846664797367  | 2 | 0.903098787432557    |
|            | 0.150456396424182  |   |                      |
| ARFGAP1    | 3.19749046628444   | 2 | 0.202150010057597    |
|            | 0.590927093178254  |   |                      |
| PPDPF      | 7.85505140679329   | 2 | 0.0196923370056581   |
|            | 0.237634443290011  |   |                      |
| HELZ2      | 1.06076774131684   | 2 | 0.588379064862984    |
|            | 0.418566340364892  |   |                      |
| GMEB2      | 0.517294539614465  | 2 | 0.772095316347616    |
|            | 0.325577915378946  |   |                      |
| MHENCN     | 0.018614896784995  | 2 | 0.990735731835535    |
|            | 0.0854348654659157 |   |                      |
| ARFRP1     | 0.240374528272247  | 2 | 0.886754363877994    |
|            | 0.109095383886535  |   |                      |
| SLC2A4RG   | 2.39815081417252   | 2 | 0.301472822727141    |
|            | 3.11372363587022   |   |                      |
| AL118506.1 | 2.20186500489862   | 2 | 0.332560825278078    |
|            | 1.89111900017409   |   |                      |
| TPD52L2    | 2.48650160131459   | 2 | 0.288445014941126    |
|            | 0.331948621717207  |   |                      |
| DNAJC5     | 0.0890001293240358 | 2 | 0.95647553824598     |
|            | 0.111264643090326  |   |                      |

|          |                     |   |                      |                   |
|----------|---------------------|---|----------------------|-------------------|
| UCKL1    | 1.47060582822321    | 2 | 0.47936023200154     | 0.275508870812085 |
| ZNF512B  | 3.67296280054345    | 2 | 0.159377225336423    |                   |
|          | 1.69723914070395    |   |                      |                   |
| SAMD10   | 0.0959843697058542  | 2 | 0.953141235987338    |                   |
|          | 0.191380540749585   |   |                      |                   |
| PRPF6    | 0.00985131102096741 | 2 | 0.995086455637347    |                   |
|          | 0.0159780599748481  |   |                      |                   |
| TCEA2    | 4.73491498375653    | 2 | 0.0937187041860303   |                   |
|          | 0.543928697632424   |   |                      |                   |
| RGS19    | 14.2785853761746    | 2 | 0.000793313017817932 |                   |
|          | 0.466432451428055   |   |                      |                   |
| PCMTD2   | 0.0292421318883608  | 2 | 0.985485302801321    |                   |
|          | 0.0632588566874149  |   |                      |                   |
| MIER2    | 0.212371173557209   | 2 | 0.899257742241127    |                   |
|          | 0.240654739387429   |   |                      |                   |
| TPGS1    | 1.66470783650383    | 2 | 0.43502406905993     | 0.102046243795097 |
| CDC34    | 0.00796907568335899 | 2 | 0.996023389896274    |                   |
|          | 0.0302504453339111  |   |                      |                   |
| BSG      | 13.7907942110656    | 2 | 0.00101243485121505  |                   |
|          | 0.32273518446818    |   |                      |                   |
| POLRMT   | 0.0545446740661806  | 2 | 0.973096195304284    |                   |
|          | 0.0796570711064691  |   |                      |                   |
| RNF126   | 1.88133710366096    | 2 | 0.390366767682517    |                   |
|          | 0.226803569916645   |   |                      |                   |
| PTBP1    | 0.535943924641663   | 2 | 0.764929227642478    |                   |
|          | 0.103379340923856   |   |                      |                   |
| MED16    | 5.21810606464219    | 2 | 0.0736042115806632   |                   |
|          | 0.477518921011443   |   |                      |                   |
| R3HDM4   | 7.51370444068914    | 2 | 0.0233571479339486   |                   |
|          | 0.401093616057579   |   |                      |                   |
| ARID3A   | 6.2102534657025     | 2 | 0.0448188381801767   |                   |
|          | 0.657757310558009   |   |                      |                   |
| WDR18    | 0.119246211579446   | 2 | 0.942119546081276    |                   |
|          | 0.0506082172915348  |   |                      |                   |
| TMEM259  | 0.562905517288084   | 2 | 0.754686567249921    |                   |
|          | 0.127982641396669   |   |                      |                   |
| CNN2     | 27.4220205120716    | 2 | 1.11015572901163e-06 |                   |
|          | 0.520746235179553   |   |                      |                   |
| ABCA7    | 0.149750294419037   | 2 | 0.927859324922908    |                   |
|          | 0.197112769838537   |   |                      |                   |
| ARHGAP45 | 19.1093513134652    | 2 | 7.08691274829976e-05 |                   |
|          | 0.55036268858285    |   |                      |                   |
| POLR2E   | 1.74231266367283    | 2 | 0.418467382216153    |                   |
|          | 0.109124563606648   |   |                      |                   |
| GPX4     | 14.1568762564086    | 2 | 0.000843088917381163 |                   |
|          | 0.331344498298116   |   |                      |                   |
| SBN02    | 0.119632099937235   | 2 | 0.941937787134266    |                   |
|          | 0.280837064162132   |   |                      |                   |
| STK11    | 0.0279866672056247  | 2 | 0.986104118002669    |                   |
|          | 0.0861878934262738  |   |                      |                   |

|            |                     |   |                      |
|------------|---------------------|---|----------------------|
| ATP5F1D    | 0.173975458753453   | 2 | 0.916688343901468    |
|            | 0.00940963083209464 |   |                      |
| MIDN       | 0.895488305216728   | 2 | 0.639068167041289    |
|            | 0.245953413708213   |   |                      |
| CIRBP      | 0.156121072795773   | 2 | 0.924908434223787    |
|            | 0.0234732825174347  |   |                      |
| C19orf24   | 8.24172590756859    | 2 | 0.0162305022235562   |
|            | 0.44490777251224    |   |                      |
| MUM1       | 4.06233920288178    | 2 | 0.13118200073007     |
|            |                     |   | 0.323794107451815    |
| NDUFS7     | 1.03511084937461    | 2 | 0.595975676085137    |
|            | 0.102855480576902   |   |                      |
| GAMT       | 1.05029594725578    | 2 | 0.591467836249539    |
|            | 0.311401412005728   |   |                      |
| DAZAP1     | 11.6934842508363    | 2 | 0.00288929680822447  |
|            | 0.476385172894794   |   |                      |
| RPS15      | 88.4602144221623    | 2 | 0.324497902216285    |
| AC027307.3 | 3.40231290536725    | 2 | 0.182472381312915    |
|            | 0.569744470188263   |   |                      |
| AC027307.2 | 2.32932498116546    | 2 | 0.312027956636503    |
|            | 2.00563946769147    |   |                      |
| C19orf25   | 0.226947024129785   | 2 | 0.892727842615178    |
|            | 0.0825677977392343  |   |                      |
| MBD3       | 0.00647826225986894 | 2 | 0.996766109195743    |
|            | 0.0287673315690331  |   |                      |
| UQCR11     | 7.43466571505785    | 2 | 0.0242986895632286   |
|            | 0.170536061356367   |   |                      |
| TCF3       | 17.2316449871993    | 2 | 0.000181215705421511 |
|            | 0.838802132416988   |   |                      |
| REX01      | 1.00213551988545    | 2 | 0.605883376203356    |
|            | 0.720506000013016   |   |                      |
| KLF16      | 0.241903075048164   | 2 | 0.886076900032797    |
|            | 0.363479496024481   |   |                      |
| AC012615.1 | 0.659719350615304   | 2 | 0.719024623262143    |
|            | 0.589198656252319   |   |                      |
| ABHD17A    | 2.52269236699531    | 2 | 0.283272433035293    |
|            | 0.484009082488612   |   |                      |
| SCAMP4     | 1.39313181051328    | 2 | 0.498293556244389    |
|            | 0.215849547052799   |   |                      |
| CSNK1G2    | 0.414151610248362   | 2 | 0.812958021267958    |
|            | 0.170806889482817   |   |                      |
| BTBD2      | 0.501093305351745   | 2 | 0.778375165882354    |
|            | 0.478798067081236   |   |                      |
| MKNK2      | 13.1404246002235    | 2 | 0.00140149984197768  |
|            | 0.539647004906194   |   |                      |
| MOB3A      | 7.79123279735425    | 2 | 0.0203308386839733   |
|            | 0.335909748699757   |   |                      |
| IZUM04     | 10.6610538216098    | 2 | 0.00484151829174329  |
|            | 0.832466825230922   |   |                      |
| AP3D1      | 0.977960703199325   | 2 | 0.613251376284101    |
|            | 0.190067278090469   |   |                      |

|         |                    |   |                      |
|---------|--------------------|---|----------------------|
| DOT1L   | 0.235396471343326  | 2 | 0.888964269849192    |
|         | 0.347787383019399  |   |                      |
| PLEKHJ1 | 4.33903365238296   | 2 | 0.114232797874771    |
|         | 0.238721199729214  |   |                      |
| SF3A2   | 4.9278207833438    | 2 | 0.0851015191958604   |
|         | 0.338778233909975  |   |                      |
| JSRP1   | 2.03540885614683   | 2 | 0.361423662626684    |
|         | 1.21809620965957   |   |                      |
| OAZ1    | 69.3014688431612   | 2 | 8.88178419700125e-16 |
|         | 0.274514066592389  |   |                      |
| LING03  | 2.81246415955285   | 2 | 0.245064930824527    |
|         | 2.40007194259744   |   |                      |
| LSM7    | 67.2875546525586   | 2 | 2.44249065417534e-15 |
|         | 0.632323767416933  |   |                      |
| SPPL2B  | 9.17985795728544   | 2 | 0.0101535794687581   |
|         | 0.796733776704006  |   |                      |
| TIMM13  | 2.73284266632442   | 2 | 0.255017952800619    |
|         | 0.121571958469766  |   |                      |
| LMNB2   | 0.185711019047666  | 2 | 0.911325168591057    |
|         | 0.210773086117177  |   |                      |
| GADD45B | 4.54762680446913   | 2 | 0.102918959415519    |
|         | 0.209433128767313  |   |                      |
| GNG7    | 119.958814661677   | 2 | 0                    |
|         |                    |   | 1.21236971714393     |
| SLC39A3 | 2.48227441651041   | 2 | 0.289055314868573    |
|         | 0.152377904407639  |   |                      |
| SGTA    | 0.785676165578807  | 2 | 0.675138055207169    |
|         | 0.230446325929271  |   |                      |
| THOP1   | 1.41536013269111   | 2 | 0.492786103441572    |
|         | 0.268920488168346  |   |                      |
| ZNF554  | 0.0789956853755038 | 2 | 0.961272027752281    |
|         | 0.295029181660094  |   |                      |
| ZNF57   | 0.62392562447826   | 2 | 0.732008749488491    |
|         | 0.728003787627511  |   |                      |
| AES     | 39.4375161823993   | 2 | 2.73056277588779e-09 |
|         | 0.601972575221149  |   |                      |
| S1PR4   | 47.2826887182432   | 2 | 5.40374411883704e-11 |
|         | 1.27276146583499   |   |                      |
| NCLN    | 9.50248109242547   | 2 | 0.00864096902993505  |
|         | 0.577957690091143  |   |                      |
| NFIC    | 2.99380833819815   | 2 | 0.223822003755993    |
|         | 0.88510660336524   |   |                      |
| DOHH    | 0.506685680940554  | 2 | 0.776201722837622    |
|         | 0.0983193113964352 |   |                      |
| FZR1    | 3.97729659629551   | 2 | 0.136880321839539    |
|         | 0.481024539555696  |   |                      |
| MFSD12  | 0.73037781289192   | 2 | 0.694065525041512    |
|         | 0.344694216887282  |   |                      |
| HMG20B  | 2.68836363107747   | 2 | 0.26075296463028     |
|         |                    |   | 0.299763746851282    |
| CACTIN  | 2.413542479731     | 2 | 0.299161642929356    |
|         | 1.06076078523512   |   |                      |



|           |                     |   |                      |
|-----------|---------------------|---|----------------------|
| PIP5K1C   | 1.47812275120819    | 2 | 0.477561956519979    |
|           | 0.758996298547842   |   |                      |
| APBA3     | 2.45128789456448    | 2 | 0.293568596743675    |
|           | 0.475757961647858   |   |                      |
| MRPL54    | 0.0614105253494002  | 2 | 0.969761355826731    |
|           | 0.0276680311980583  |   |                      |
| DAPK3     | 1.8896885771445     | 2 | 0.388740097464891    |
|           | 0.326388267037458   |   |                      |
| EEF2      | 18.0170117566807    | 2 | 0.000122364547023857 |
|           | 0.190690621744561   |   |                      |
| PIAS4     | 0.00964971821982577 | 2 | 0.995186761825498    |
|           | 0.0280088231704846  |   |                      |
| ZBTB7A    | 2.87916933717148    | 2 | 0.237026182661083    |
|           | 0.403191557081262   |   |                      |
| MAP2K2    | 0.0663182387185539  | 2 | 0.967384617721245    |
|           | 0.0335171345099884  |   |                      |
| SIRT6     | 3.14181485137061    | 2 | 0.207856482443368    |
|           | 0.319178060040987   |   |                      |
| EBI3      | 11.3017389642982    | 2 | 0.00351445968610198  |
|           | 1.60426252702376    |   |                      |
| YJU2      | 0.612960437881652   | 2 | 0.736033077549221    |
|           | 0.193693335650209   |   |                      |
| MPND      | 6.10832797886548    | 2 | 0.0471621323347967   |
|           | 0.522815318687456   |   |                      |
| SH3GL1    | 0.416641955432579   | 2 | 0.811946378187168    |
|           | 0.257573001358291   |   |                      |
| CHAF1A    | 1.15902914930114    | 2 | 0.560170221402913    |
|           | 0.338290703798827   |   |                      |
| UBXN6     | 0.0261154530602742  | 2 | 0.987027155722844    |
|           | 0.0344031709778785  |   |                      |
| HDGFL2    | 0.747412171777103   | 2 | 0.688179147670245    |
|           | 0.163111981747446   |   |                      |
| SEMA6B    | 0.4090384010358     | 2 | 0.815039092594585    |
|           | 0.492879641395668   |   |                      |
| TNFAIP8L1 | 1.61989419161153    | 2 | 0.444881601703041    |
|           | 0.462947425289992   |   |                      |
| MYDGF     | 16.9769762304053    | 2 | 0.00020582420748827  |
|           | 0.283600003005283   |   |                      |
| DPP9      | 0.0453740527204947  | 2 | 0.977568389037462    |
|           | 0.0774671703530161  |   |                      |
| FEM1A     | 3.25682208362522    | 2 | 0.196241145499257    |
|           | 0.660822819751538   |   |                      |
| TICAM1    | 1.6170334269641     | 2 | 0.445518407811788    |
|           | 0.345170461936849   |   |                      |
| PLIN3     | 10.955582468824     | 2 | 0.00417854894769865  |
|           | 0.28869872616744    |   |                      |
| ARRDC5    | 0.101275484847993   | 2 | 0.950622978540469    |
|           | 0.217125497504616   |   |                      |
| UHRF1     | 0.00534207391463913 | 2 | 0.997332527087956    |
|           | 0.0480813019968314  |   |                      |

|            |                    |   |                    |
|------------|--------------------|---|--------------------|
| KDM4B      | 3.41962003436582   | 2 | 0.180900157274163  |
|            | 0.373745381050851  |   |                    |
| PTPRS      | 2.48277824190991   | 2 | 0.288982507334784  |
|            | 0.824849706646668  |   |                    |
| AC005790.1 | 0.474023004515703  | 2 | 0.788982212888565  |
|            | 0.569473745306652  |   |                    |
| SAFB2      | 0.576754799062098  | 2 | 0.749478685953439  |
|            | 0.10813776884545   |   |                    |
| SAFB       | 5.5270793709562    | 2 | 0.0630681314419722 |
|            | 0.298748602146501  |   |                    |
| RPL36      | 22.3340191163412   | 2 | 1.413283763263e-05 |
|            | 0.161407233251165  |   |                    |
| C19orf70   | 1.56455285354297   | 2 | 0.457363670445325  |
|            | 0.146462118779273  |   |                    |
| HSD11B1L   | 2.78406572424476   | 2 | 0.248569483186084  |
|            | 1.88909371355713   |   |                    |
| LONP1      | 2.33349111851583   | 2 | 0.311378657476408  |
|            | 0.234345281893214  |   |                    |
| DUS3L      | 1.23916460524442   | 2 | 0.538169182510067  |
|            | 0.248784483853625  |   |                    |
| NDUFA11    | 5.00639020065502   | 2 | 0.0818231473612021 |
|            | 0.128301983856169  |   |                    |
| VMAC       | 1.06587019638877   | 2 | 0.586879889173419  |
|            | 0.522990311124681  |   |                    |
| CAPS       | 0.856697885810535  | 2 | 0.651584009508005  |
|            | 0.637245751758663  |   |                    |
| RANBP3     | 0.0774986095377172 | 2 | 0.961991845687324  |
|            | 0.0568718561689537 |   |                    |
| RFX2       | 0.845627628496274  | 2 | 0.655200610774541  |
|            | 0.582804136870886  |   |                    |
| MLLT1      | 0.72447219784064   | 2 | 0.696117995731288  |
|            | 0.622612710435092  |   |                    |
| CLPP       | 1.71519654205921   | 2 | 0.424179624391038  |
|            | 0.176308668728903  |   |                    |
| ALKBH7     | 3.74193807292455   | 2 | 0.153974382707264  |
|            | 0.289658873936334  |   |                    |
| GTF2F1     | 0.179855894137538  | 2 | 0.913997039064521  |
|            | 0.0706811259820311 |   |                    |
| KHSRP      | 0.561959963769558  | 2 | 0.755043449875703  |
|            | 0.206160136117777  |   |                    |
| SLC25A23   | 2.89030095396722   | 2 | 0.235710604866269  |
|            | 2.18165428844237   |   |                    |
| DENND1C    | 1.088472154022     | 2 | 0.580284907042765  |
|            | 0.212662454388002  |   |                    |
| CD70       | 1.21850560840964   | 2 | 0.543757010273781  |
|            | 0.508267842550426  |   |                    |
| GPR108     | 0.444700052486747  | 2 | 0.80063507199612   |
|            | 0.137046366655778  |   |                    |
| TRIP10     | 0.67789938202188   | 2 | 0.712518294262588  |
|            | 0.346391176522228  |   |                    |

|            |                     |   |                                    |
|------------|---------------------|---|------------------------------------|
| SH2D3A     | 2.17257133881659    | 2 | 0.337467635052611                  |
|            | 0.622302401006582   |   |                                    |
| VAV1       | 2.16508026719962    | 2 | 0.33873400229534 0.35353584870675  |
| ZNF557     | 0.00659776476873578 | 2 | 0.99670655294964                   |
|            | 0.0314999452384422  |   |                                    |
| PEX11G     | 0.679494240007357   | 2 | 0.711950337999379                  |
|            | 0.853055185484654   |   |                                    |
| MCOLN1     | 1.15615593449693    | 2 | 0.560975544417418                  |
|            | 0.62281460132811    |   |                                    |
| PNPLA6     | 4.03443435790202    | 2 | 0.133025135625534                  |
|            | 0.833390616085488   |   |                                    |
| XAB2       | 0.0020634311035914  | 2 | 0.998968816483709                  |
|            | 0.0107707734494468  |   |                                    |
| PET100     | 7.50105832055737    | 2 | 0.0235053044910862                 |
|            | 0.133497818773735   |   |                                    |
| AC008763.2 | 1.24696174494695    | 2 | 0.536075176826174                  |
|            | 1.3357751256863     |   |                                    |
| STXBP2     | 3.14517732226631    | 2 | 0.207507320351106                  |
|            | 0.157769815091228   |   |                                    |
| TRAPPC5    | 0.683212959564983   | 2 | 0.710627796098025                  |
|            | 0.378821535307699   |   |                                    |
| FCER2      | 7.58539105469322    | 2 | 0.0225347768030382                 |
|            | 1.08066250297794    |   |                                    |
| MAP2K7     | 1.00048647176565    | 2 | 0.606383147633002                  |
|            | 0.22969615905674    |   |                                    |
| SNAPC2     | 0.00505510527222953 | 2 | 0.997475638935528                  |
|            | 0.0203723050880456  |   |                                    |
| TIMM44     | 1.10259108685303    | 2 | 0.576202830822926                  |
|            | 0.219471417907482   |   |                                    |
| ELAVL1     | 11.6142232601763    | 2 | 0.00300610027450743                |
|            | 0.297601451635473   |   |                                    |
| AC008946.1 | 0.999877051925024   | 2 | 0.606567946747227                  |
|            | 0.984974780158358   |   |                                    |
| CERS4      | 3.36749733648232    | 2 | 0.185676629711092                  |
|            | 0.138597114809159   |   |                                    |
| CD320      | 2.39660378069974    | 2 | 0.301706107214183                  |
|            | 0.448560887768449   |   |                                    |
| NDUFA7     | 2.47434978217731    | 2 | 0.290202915782721                  |
|            | 0.14151015048968    |   |                                    |
| RPS28      | 25.779567844982     | 2 | 2.52370140518821e-06               |
|            | 0.184358587102211   |   |                                    |
| RAB11B-AS1 | 2.73926094345792    | 2 | 0.254200876609658                  |
|            | 0.610082216959898   |   |                                    |
| RAB11B     | 0.00729950716919981 | 2 | 0.996356898670523                  |
|            | 0.0129048093508168  |   |                                    |
| MARCH2     | 3.02813281850273    | 2 | 0.22001349155692 0.658654983312164 |
| HNRNPM     | 25.964104094841     | 2 | 2.30126393863106e-06               |
|            | 0.351538358830879   |   |                                    |
| ZNF414     | 0.313019580989547   | 2 | 0.855123145583239                  |
|            | 0.148826033661729   |   |                                    |

|                    |                     |   |                     |
|--------------------|---------------------|---|---------------------|
| MY01F              | 0.582379850412126   | 2 | 0.747373719430092   |
| 1.06934401924493   |                     |   |                     |
| ZNF558             | 2.74014232574432    | 2 | 0.254088877215126   |
| 2.43622467327999   |                     |   |                     |
| ZNF317             | 1.36399828076791    | 2 | 0.505605205565851   |
| 0.721654912210124  |                     |   |                     |
| ZNF559             | 0.0216323409508255  | 2 | 0.989242113969031   |
| 0.103112309756874  |                     |   |                     |
| ZNF266             | 7.68662747210864    | 2 | 0.0214224951021033  |
| 2.18519262925936   |                     |   |                     |
| ZNF426             | 0.161112183991972   | 2 | 0.922603151480061   |
| 0.220600925407733  |                     |   |                     |
| ZNF121             | 0.463692730794995   | 2 | 0.793067956627811   |
| 0.317269563096974  |                     |   |                     |
| ZNF561             | 0.0161291902221188  | 2 | 0.991967836494943   |
| 0.0536121057695753 |                     |   |                     |
| ZNF562             | 0.0175455418333681  | 2 | 0.991265597556841   |
| 0.051670244508947  |                     |   |                     |
| ZNF846             | 2.96084489498094    | 2 | 0.227541543723084   |
| 2.49782206641253   |                     |   |                     |
| FBXL12             | 0.115966613121981   | 2 | 0.943665700331127   |
| 0.0879766818679118 |                     |   |                     |
| UBL5               | 20.6541637977467    | 3 | 2.7344702603094e-05 |
| 0.297118029576794  |                     |   |                     |
| PIN1               | 1.31455299068877    | 2 | 0.518260900115431   |
| 0.160003815784617  |                     |   |                     |
| C19orf66           | 2.48544987125728    | 2 | 0.288596737976596   |
| 0.402126160703961  |                     |   |                     |
| ANGPTL6            | 1.73706121789547    | 2 | 0.419567605408296   |
| 0.557710659963135  |                     |   |                     |
| PPAN               | 0.0787101960226247  | 2 | 0.961409254010778   |
| 0.0594977744046422 |                     |   |                     |
| P2RY11             | 11.0639535075259    | 2 | 0.00395815704879332 |
| 2.00685195477217   |                     |   |                     |
| EIF3G              | 11.0344547457933    | 2 | 0.00401697007630686 |
| 0.182069410982569  |                     |   |                     |
| DNMT1              | 2.08586898635642    | 2 | 0.352418991961597   |
| 0.153851879467027  |                     |   |                     |
| S1PR2              | 0.581256213011355   | 2 | 0.747793725934551   |
| 0.0942636440189597 |                     |   |                     |
| MRPL4              | 2.22253739381185    | 2 | 0.329141115756531   |
| 0.190813534780961  |                     |   |                     |
| ICAM1              | 3.81151965655459    | 2 | 0.148709605919654   |
| 0.755662045269154  |                     |   |                     |
| ZGLP1              | 0.040060847010676   | 2 | 0.980168852680812   |
| 0.160775619104006  |                     |   |                     |
| AC011511.1         | 3.1887897957378     | 2 | 0.203031346040388   |
| 1.18078311105719   |                     |   |                     |
| FDX2               | 0.00227726365900795 | 2 | 0.998862016165752   |
| 0.0108896826225495 |                     |   |                     |

|          |                    |   |                      |
|----------|--------------------|---|----------------------|
| RAVER1   | 0.171780803302989  | 2 | 0.917694803543671    |
|          | 0.2370169090824    |   |                      |
| ICAM3    | 22.1044990698698   | 2 | 1.58514507012653e-05 |
|          | 0.769238866243839  |   |                      |
| TYK2     | 0.141434129360505  | 2 | 0.931725472882268    |
|          | 0.121184017750196  |   |                      |
| CDC37    | 0.140758803017187  | 2 | 0.932040135382536    |
|          | 0.0356518603429025 |   |                      |
| KEAP1    | 7.48296252502606   | 2 | 0.0237189431158412   |
|          | 0.604909249888098  |   |                      |
| ATG4D    | 2.58869297941044   | 2 | 0.274076917905809    |
|          | 0.38048752726108   |   |                      |
| KRI1     | 5.0120398950767    | 2 | 0.0815923356290208   |
|          | 0.359753582603794  |   |                      |
| CDKN2D   | 0.369837255973946  | 2 | 0.831171915232352    |
|          | 0.166661412177195  |   |                      |
| SLC44A2  | 0.336284902190678  | 2 | 0.845233421681644    |
|          | 0.0867567241706832 |   |                      |
| ILF3-DT  | 2.54321102641994   | 2 | 0.28038110465221     |
|          | 0.709183321482419  | 2 | 0.333859960617332    |
|          | 0.105902776202233  |   | 0.701459818317776    |
| QTRT1    | 1.46349724419096   | 2 | 0.481067049714425    |
|          | 0.139330789618899  |   |                      |
| DNM2     | 0.787212492390385  | 2 | 0.674619637999359    |
|          | 0.115245942120299  |   |                      |
| TMED1    | 0.181634088144849  | 2 | 0.91318476818305     |
|          | 0.0358920698364584 |   |                      |
| C19orf38 | 1.0898777273759    | 2 | 0.579877220659592    |
|          | 0.491882008535616  |   |                      |
| CARM1    | 0.0492666651347854 | 2 | 0.97566759198056     |
|          | 0.102832204840677  |   |                      |
| YIPF2    | 0.983223636458144  | 2 | 0.611639747156098    |
|          | 0.281840876609551  |   |                      |
| TIMM29   | 0.61635062854078   | 2 | 0.734786488159479    |
|          | 0.170495184198311  |   |                      |
| SMARCA4  | 2.15875561851611   | 2 | 0.33980688458297     |
|          | 0.368605845864219  | 2 | 0.146821323347316    |
| LDLR     | 23.5696319684811   | 2 | 7.61937674020885e-06 |
|          | 1.2621848320574    |   |                      |
| KANK2    | 27.4801397716196   | 2 | 1.07835924911814e-06 |
|          | 1.98895796473372   |   |                      |
| RAB3D    | 0.513319886880841  | 2 | 0.773631247420135    |
|          | 0.656323996014799  |   |                      |
| TMEM205  | 2.4657111105728    | 2 | 0.291459110637453    |
|          | 0.368605845864219  |   |                      |
| CCDC159  | 6.90436930855517   | 2 | 0.0316763588390494   |
|          | 1.39546839125091   |   |                      |
| SWSAP1   | 2.20233954909845   | 2 | 0.332481927233237    |
|          | 0.391662503037381  |   |                      |
| PRKCSH   | 8.63465392783171   | 2 | 0.0133354821680767   |
|          | 0.602309285704885  |   |                      |

|         |                    |   |                    |
|---------|--------------------|---|--------------------|
| ZNF653  | 1.38336000040248   | 2 | 0.500734128597189  |
|         | 0.788287255527986  |   |                    |
| ECSIT   | 0.396337734435894  | 2 | 0.820231331259275  |
|         | 0.120035532605925  |   |                    |
| ELOF1   | 1.50614943032901   | 2 | 0.470916390698179  |
|         | 0.0988178155159494 |   |                    |
| ZNF627  | 2.2631722432564    | 2 | 0.32252129251346   |
| ACP5    | 3.90306997795433   | 2 | 0.930386870565283  |
|         | 0.420989259832892  |   | 0.142055849981619  |
| ZNF823  | 2.12687125434966   | 2 | 0.345267559695092  |
|         | 1.918959596991     |   |                    |
| ZNF441  | 2.47705862141193   | 2 | 0.289810125322183  |
|         | 1.04909643778736   |   |                    |
| ZNF440  | 2.38292950225795   | 2 | 0.303775981820153  |
|         | 1.52641137637656   |   |                    |
| ZNF439  | 1.70750666326333   | 2 | 0.425813708805302  |
|         | 0.415948159680662  |   |                    |
| ZNF700  | 0.257424457249799  | 2 | 0.879226945490773  |
|         | 0.279303663703589  |   |                    |
| ZNF433  | 1.22760810575966   | 2 | 0.541287860021789  |
|         | 1.0910087433702    |   |                    |
| ZNF844  | 5.23263318583649   | 2 | 0.0730715198908611 |
|         | 1.39321437116541   |   |                    |
| ZNF20   | 0.442532908080777  | 2 | 0.801503088099     |
|         | 0.443452510818107  |   |                    |
| ZNF136  | 6.83118029416833   | 2 | 0.0328570105098266 |
|         | 0.929628949282716  |   |                    |
| ZNF44   | 6.35844789761435   | 2 | 0.0416179402442682 |
|         | 0.463734977182998  |   |                    |
| ZNF563  | 4.26259532701786   | 2 | 0.118683183046288  |
|         | 0.728606306125269  |   |                    |
| ZNF442  | 2.36639139964961   | 2 | 0.306298335361611  |
|         | 1.7202171409384    |   |                    |
| ZNF799  | 5.1443360343747    | 2 | 0.0763697947860281 |
|         | 1.39368147052902   |   |                    |
| ZNF564  | 0.810442729287705  | 2 | 0.666829182114776  |
|         | 0.697955882771751  |   |                    |
| ZNF791  | 1.28254067665074   | 2 | 0.526623009549576  |
|         | 0.286745323564165  |   |                    |
| MAN2B1  | 1.0943616717266    | 2 | 0.578578621458701  |
|         | 0.778747795171313  |   |                    |
| WDR83   | 4.41696798406637   | 2 | 0.109867081697765  |
|         | 0.444157018612833  |   |                    |
| WDR830S | 0.0475260869034106 | 2 | 0.976517074460451  |
|         | 0.0187423811235239 |   |                    |
| DHPS    | 3.77895916877664   | 2 | 0.151150449425295  |
|         | 0.31226160593815   |   |                    |
| FBXW9   | 6.26676404737423   | 2 | 0.0435701923691929 |
|         | 1.46816445167721   |   |                    |
| TNP02   | 1.07693094221263   | 2 | 0.583643182877746  |

|                              |   |                                    |  |
|------------------------------|---|------------------------------------|--|
| 0.538261436186992            |   |                                    |  |
| TRIR 0.345508723435632       | 2 | 0.841344255821842                  |  |
| 0.0151345775307535           |   |                                    |  |
| ASNA1 8.26150641366631 2     |   | 0.016070769649291                  |  |
| 0.186260867690365            |   |                                    |  |
| H00K2 0.234282430216072      | 2 | 0.889459579163757                  |  |
| 0.136973187119757            |   |                                    |  |
| JUNB 11.2643349636275 2      |   | 0.00358080557900864                |  |
| 0.57389219479054             |   |                                    |  |
| PRDX2 1.04529220349755 2     |   | 0.592949465647077                  |  |
| 0.108232166001132            |   |                                    |  |
| RNASEH2A 0.0175835967496821  | 2 | 0.991246736471601                  |  |
| 0.0682275467263676           |   |                                    |  |
| DNASE2 10.0142610747489 2    |   | 0.00669007270375277                |  |
| 0.773095831904667            |   |                                    |  |
| GCDH 0.0844052706132665      | 2 | 0.958675499385256                  |  |
| 0.069737232805755            |   |                                    |  |
| FARSA 1.15040648787525 2     |   | 0.562590514075046                  |  |
| 0.173061738658405            |   |                                    |  |
| CALR 17.4551161329485 2      |   | 0.000162057707589591               |  |
| 0.498766399629133            |   |                                    |  |
| RAD23A 0.00962692372984875   | 2 | 0.995198104277468                  |  |
| 0.00897316625889875          |   |                                    |  |
| GADD45GIP1 0.914090191160683 | 2 | 0.633151787071676                  |  |
| 0.0885849827712118           |   |                                    |  |
| LYL1 3.39452169384166 2      |   | 0.18318460814988 0.273435742265552 |  |
| TRMT1 7.55985383892312 2     |   | 0.0228243593806178                 |  |
| 0.502658611353698            |   |                                    |  |
| NACC1 1.77539187801623 2     |   | 0.41160301951449 0.614685381937436 |  |
| STX10 2.01476872134568 2     |   | 0.365172892059843                  |  |
| 0.231655612250281            |   |                                    |  |
| IER2 32.5038134137656 2      |   | 8.74755329283161e-08               |  |
| 0.821627005112078            |   |                                    |  |
| CACNA1A 0.044907325442393    | 2 | 0.977796544574717                  |  |
| 0.0724503297651714           |   |                                    |  |
| CCDC130 3.08581512635903 2   |   | 0.213758680133194                  |  |
| 0.378408644222898            |   |                                    |  |
| MRI1 1.63190502911669 2      |   | 0.442217907693989                  |  |
| 0.437502110139432            |   |                                    |  |
| C19orf53 2.28961498854305 2  |   | 0.318285183614354                  |  |
| 0.0757191307604154           |   |                                    |  |
| ZSWIM4 3.79006433702822 2    |   | 0.150313499606693                  |  |
| 3.16301731157017             |   |                                    |  |
| AC020916.1 0.015512593003394 | 2 | 0.992273705946608                  |  |
| 0.0809458529299726           |   |                                    |  |
| CC2D1A 0.775154594433068     | 2 | 0.67869917066704                   |  |
| 0.266074336289508            |   |                                    |  |
| DCAF15 0.0712240443019007    | 2 | 0.965014625160799                  |  |
| 0.0933096783965993           |   |                                    |  |
| RFX1 0.0979638521358643      | 2 | 0.952198339511083                  |  |

0.10024262899218  
 AC022098.4 2.19984733164882 2 0.332896494107661  
 2.3346677933633  
 IL27RA 2.64587117712437 2 0.266352252546642  
 0.828585774095498  
 SAMD1 0.034272676668027 2 0.983009653599842  
 0.177985140196637  
 PRKACA 1.87968787830354 2 0.390688801826964  
 0.631078167446985  
 ASF1B 1.04259897795868 2 0.593748476827734  
 0.604912358435584  
 AC022098.1 0.369172731337323 2 0.831448128224866  
 0.479970216685429  
 ADGRE5 2.58927460729374 2 0.273997224105593  
 1.06446885271324  
 DDX39A 21.3249912762464 2 2.340652711110806e-05  
 0.42238805707235  
 PKN1 0.622483234927361 2 0.73253686078687  
 0.140399143537266  
 GIPC1 2.6805671021081 2 0.26177143249036 1.11045216277496  
 DNAJB1 2.03193939810465 2 0.362051178871107  
 0.381085833856666  
 TECR 1.36580496282769 2 0.505148677869883  
 0.0984642720676117  
 NDUFB7 3.90434913634208 2 0.141965023064201  
 0.15781617948479  
 CLEC17A 7.64531953412348 2 0.021869555545574  
 1.82328840077105  
 ZNF333 4.80926414999405 2 0.0902987126528408  
 0.714522112200988  
 ILVBL 1.62958940423369 2 0.442730209606907  
 0.567047101411305  
 BRD4 2.37988739137871 2 0.304238393517488  
 0.230234672089184  
 AKAP8 3.95282264604628 2 0.138565613337934  
 0.487485744691121  
 AKAP8L 0.239664588620096 2 0.887069190794034  
 0.0858290011290917  
 WIZ 2.52269328385596 2 0.283272303174649  
 1.34542295655459  
 RASAL3 3.33823687540715 2 0.188413090324026  
 0.347663167175201  
 TPM4 6.97987370842986 2 0.0305027982335468  
 0.297060516799077  
 RAB8A 1.48811927175777 2 0.475180933008581  
 0.167101851509528  
 HSH2D 15.9487368514583 2 0.00034417220644134  
 0.559600345951809  
 FAM32A 0.153283362893031 2 0.926221676565137  
 0.0196185944891981



|            |                     |   |                      |
|------------|---------------------|---|----------------------|
| AP1M1      | 0.800286203375864   | 2 | 0.670224128968708    |
|            | 0.190521558331432   |   |                      |
| KLF2       | 9.30441365622762    | 2 | 0.009540524384405    |
|            | 0.683119455966469   |   |                      |
| EPS15L1    | 4.92119188518737    | 2 | 0.0853840518090451   |
|            | 0.268862983113242   |   |                      |
| C19orf44   | 0.635787661675583   | 2 | 0.727680041493937    |
|            | 0.64136675186864    |   |                      |
| CHERP      | 0.537957667796551   | 2 | 0.764159429753251    |
|            | 0.239435891539129   |   |                      |
| AC008764.6 | 0.141002011102705   | 2 | 0.931926802425073    |
|            | 0.375523331595475   |   |                      |
| SLC35E1    | 2.13547092172551    | 2 | 0.343786153792493    |
|            | 0.490341664901667   |   |                      |
| AC008764.8 | 1.27746140301928    | 2 | 0.52796214046597     |
|            | 0.64296606230595    |   |                      |
| MED26      | 0.238810163052113   | 2 | 0.887448239053992    |
|            | 0.146607959834839   |   |                      |
| SMIM7      | 0.516930149746003   | 2 | 0.772236001018626    |
|            | 0.091534125123581   |   |                      |
| TMEM38A    | 0.163697932813618   | 2 | 0.921411112218741    |
|            | 0.0821146382237472  |   |                      |
| SIN3B      | 0.768730096436769   | 2 | 0.680882826743903    |
|            | 0.282026058194192   |   |                      |
| F2RL3      | 23.3005743737336    | 2 | 8.71654872447447e-06 |
|            | 1.12561812290025    |   |                      |
| HAUS8      | 3.72398939552705    | 2 | 0.155362420011169    |
|            | 0.375629062571494   |   |                      |
| MY09B      | 0.649665070350859   | 2 | 0.72264836169061     |
|            | 0.201360249768959   |   |                      |
| USE1       | 0.187787094822691   | 2 | 0.91037966935513     |
|            | 0.0584137840267752  |   |                      |
| OCEL1      | 0.81863226598886    | 2 | 0.664104253867018    |
|            | 0.178261312088572   |   |                      |
| NR2F6      | 1.85433096956686    | 2 | 0.39567366538231     |
|            | 0.610673985506295   |   |                      |
| BABAM1     | 3.61482982225398    | 2 | 0.164077744586756    |
|            | 0.200558108147446   |   |                      |
| ANKLE1     | 3.3404902045151     | 2 | 0.188200931512002    |
|            | 0.584069694690626   |   |                      |
| ABHD8      | 3.16750784945475    | 2 | 0.205203332671675    |
|            | 0.409715136696063   |   |                      |
| MRPL34     | 1.63245465544739    | 2 | 0.442096397088125    |
|            | 0.0978801897495796  |   |                      |
| DDA1       | 0.00061477404720579 | 2 | 0.999692660214948    |
|            | 0.00409138327405985 |   |                      |
| GTPBP3     | 2.73863316284272    | 2 | 0.254280680325161    |
|            | 0.494002138298387   |   |                      |
| BST2       | 110.624006315469    | 2 | 0.751498399886328    |
| BISPR      | 2.14378488548823    | 2 | 0.342360007266458    |
|            | 0.323088337872825   |   |                      |

|            |                     |   |                      |
|------------|---------------------|---|----------------------|
| MVB12A     | 0.903314296610241   | 2 | 0.636572382235848    |
|            | 0.192662296370131   |   |                      |
| AC010618.3 | 3.61432187308591    | 2 | 0.164119421455896    |
|            | 0.95916158164931    |   |                      |
| PGLS       | 19.2915468558805    | 2 | 6.46984425938246e-05 |
|            | 0.310954090557986   |   |                      |
| FAM129C    | 34.070964485042     | 2 | 3.99561895791933e-08 |
|            | 1.05655126849793    |   |                      |
| COLGALT1   | 0.533013199923193   | 2 | 0.766050947802673    |
|            | 0.233694097064531   |   |                      |
| MAP1S      | 5.58747827100346    | 2 | 0.061191980507955    |
|            | 0.508851746911011   |   |                      |
| FCH01      | 2.66498470413072    | 2 | 0.26381891161178     |
| JAK3       | 0.101008788393046   | 2 | 0.384996083315656    |
|            | 0.137703054686307   |   | 0.950749750881899    |
| RPL18A     | 42.860740134339     | 2 | 4.93069918228173e-10 |
|            | 0.173122877277357   |   |                      |
| CCDC124    | 0.265514358784193   | 2 | 0.875677698886244    |
|            | 0.0844792958560979  |   |                      |
| ARRDC2     | 1.27991853982318    | 2 | 0.527313901147477    |
|            | 0.288910563061135   |   |                      |
| IL12RB1    | 3.11167385839513    | 2 | 0.211012706023646    |
|            | 0.606449610095631   |   |                      |
| MAST3      | 3.33178813974046    | 2 | 0.189021583908231    |
|            | 0.520090846141652   |   |                      |
| PIK3R2     | 3.24653342547065    | 2 | 0.197253275663432    |
|            | 1.64833873781661    |   |                      |
| IFI30      | 1.5009711580204     | 2 | 0.47213723713781     |
| MPV17L2    | 7.55258351904311    | 2 | 0.3599593587106      |
|            | 0.738627330138619   |   | 0.022907480565362    |
| RAB3A      | 0.899301474876069   | 2 | 0.637850890158442    |
|            | 0.594546649740016   |   |                      |
| JUND       | 0.65014099054072    | 2 | 0.722476420676222    |
|            | 0.152293547988696   |   |                      |
| LSM4       | 0.36165395027346    | 2 | 0.834579749250854    |
|            | 0.067605508370221   |   |                      |
| PGPEP1     | 0.375673250973036   | 2 | 0.828750092816314    |
|            | 0.248497714360665   |   |                      |
| SSBP4      | 2.55804342716237    | 2 | 0.278309433658557    |
|            | 0.512409691096238   |   |                      |
| ISYNA1     | 0.502031336558004   | 2 | 0.778010181382869    |
|            | 0.532292295585991   |   |                      |
| ELL        | 0.137759601525608   | 2 | 0.933438871975757    |
|            | 0.136996580788008   |   |                      |
| FKBP8      | 0.00122033209621719 | 2 | 0.999390020065339    |
|            | 0.00363121527142352 |   |                      |
| KXD1       | 0.789915373050117   | 2 | 0.673708545595424    |
|            | 0.142558994045324   |   |                      |
| AC005253.1 | 0.0700284332412043  | 2 | 0.965591688709292    |
|            | 0.194622883912241   |   |                      |

|              |                     |   |                      |
|--------------|---------------------|---|----------------------|
| UBA52        | 36.6856045480381    | 2 | 1.08099127427153e-08 |
|              | 0.188618572338669   |   |                      |
| REX1BD       | 6.83587419247804    | 2 | 0.0327799871970337   |
|              | 0.400757812612352   |   |                      |
| CRTC1        | 0.231714206958515   | 2 | 0.890602478200614    |
|              | 0.153294811175153   |   |                      |
| UPF1         | 0.109413019375235   | 2 | 0.946762972942699    |
|              | 0.158649786735029   |   |                      |
| COPE         | 3.42098243131931    | 2 | 0.180776970324729    |
|              | 0.0750727780958052  |   |                      |
| DDX49        | 0.343152712078927   | 2 | 0.842335948127553    |
|              | 0.115537087909199   |   |                      |
| SUGP2        | 1.20786191446119    | 2 | 0.546658515709538    |
|              | 0.273129916302188   |   |                      |
| ARMC6        | 1.16147290146313    | 2 | 0.559486180799626    |
|              | 0.284348771133985   |   |                      |
| SLC25A42     | 9.81316439346772    | 2 | 0.00739772915558168  |
|              | 0.669646557098153   |   |                      |
| TMEM161A     | 5.06152499573012    | 2 | 0.0795983036041089   |
|              | 0.56487854725252    |   |                      |
| BORCS8-MEF2B | 32.282619569962     | 2 | 9.77053240536208e-08 |
|              | 0.718511267618113   |   |                      |
| MEF2B        | 0.0121521674809526  | 2 | 0.99394233832611     |
|              | 0.0969927358938233  |   |                      |
| BORCS8       | 0.042205077865003   | 2 | 0.979118561649839    |
|              | 0.0462356473367941  |   |                      |
| RFXANK       | 0.879018426400987   | 2 | 0.644352583234769    |
|              | 0.11501107297734    |   |                      |
| NR2C2AP      | 1.24867710514519    | 2 | 0.535615592931531    |
|              | 0.431684321329235   |   |                      |
| SUGP1        | 0.0011954942726855  | 2 | 0.999402431478886    |
|              | 0.00871698525241845 |   |                      |
| MAU2         | 0.985070030358538   | 2 | 0.61107534377473     |
|              | 0.408311211969318   |   |                      |
| GATAD2A      | 1.83129970805919    | 2 | 0.400256433300257    |
|              | 0.34280582080683    |   |                      |
| NDUFA13      | 4.39811467676141    | 2 | 0.11090765749294     |
|              | 0.120782853764225   |   |                      |
| YJEFN3       | 0.0880863242832062  | 2 | 0.956912654182202    |
|              | 0.162689561872822   |   |                      |
| PBX4         | 2.46665005947025    | 2 | 0.291322310146841    |
|              | 2.5318229966905     |   |                      |
| LPAR2        | 0.10788104209142    | 2 | 0.947488460448674    |
|              | 0.234028920357655   |   |                      |
| GMIP         | 2.46067202789747    | 2 | 0.292194379796501    |
|              | 0.251534346222605   |   |                      |
| ATP13A1      | 0.0768798206110493  | 2 | 0.962289526686204    |
|              | 0.0743043953934399  |   |                      |
| ZNF101       | 15.3216398833545    | 2 | 0.00047092112459457  |
|              | 0.921371041370196   |   |                      |
| ZNF14        | 0.0374670780772598  | 2 | 0.981440843074616    |

|                              |   |                   |
|------------------------------|---|-------------------|
| 0.133339533971033            |   |                   |
| ZNF506 1.14843222086944 2    |   | 0.563146140213376 |
| 0.354875353162998            |   |                   |
| ZNF253 0.37548174350442 2    |   | 0.828829452531944 |
| 0.244031314828417            |   |                   |
| ZNF93 0.744620022830308      | 2 | 0.689140567962443 |
| 0.479821579359187            |   |                   |
| ZNF682 0.429618966091167     | 2 | 0.80669511463445  |
| 0.390300994919791            |   |                   |
| ZNF90 0.734466613359912      | 2 | 0.692648026780308 |
| 0.608733861392893            |   |                   |
| AC011447.3 0.587029025710341 | 2 | 0.745638401443446 |
| 0.220119076411298            |   |                   |
| ZNF486 0.178005871461438     | 2 | 0.914842887838141 |
| 0.246680248249946            |   |                   |
| ZNF737 0.000495238696530623  | 2 | 0.999752411306875 |
| 0.0175926348301717           |   |                   |
| ZNF626 4.22582389386576 2    |   | 0.120885441425037 |
| 0.51388909372158             |   |                   |
| ZNF85 0.395718060544783      | 2 | 0.820485508604335 |
| 0.245687377250022            |   |                   |
| ZNF430 0.060066103598019     | 2 | 0.970413459107846 |
| 0.0441555547536811           |   |                   |
| ZNF714 0.917897355476414     | 2 | 0.631947677051364 |
| 0.262791189638354            |   |                   |
| ZNF431 0.005342306548408     | 2 | 0.99733241108135  |
| 0.0192657973437249           |   |                   |
| ZNF708 0.266599179722468     | 2 | 0.875202850927672 |
| 0.200500267279212            |   |                   |
| ZNF738 0.131940359887358     | 2 | 0.936158780182941 |
| 0.101590153130831            |   |                   |
| ZNF493 0.35070737272326 2    |   | 0.839160168769133 |
| 0.158083627971775            |   |                   |
| ZNF429 0.424454059168016     | 2 | 0.80878105949416  |
| 0.253964313884997            |   |                   |
| ZNF100 0.305512183397633     | 2 | 0.85833905230172  |
| 0.257474944440235            |   |                   |
| ZNF43 0.754574467829896      | 2 | 0.685719083829258 |
| 0.382250548588317            |   |                   |
| ZNF257 0.718709054237847     | 2 | 0.698126802588827 |
| 0.625867983317576            |   |                   |
| ZNF730 0.8132958097666 2     |   | 0.665878601635507 |
| 0.819554590640857            |   |                   |
| ZNF724 0.421130887464144     | 2 | 0.810126035747245 |
| 0.476341080522911            |   |                   |
| ZNF91 0.285511314478823      | 2 | 0.866965879853617 |
| 0.233510338445439            |   |                   |
| ZNF675 0.00825906473712135   | 2 | 0.995878982425493 |
| 0.0386228347879736           |   |                   |
| ZNF681 2.39918298373571 2    |   | 0.301317277332025 |

|                    |                     |                     |
|--------------------|---------------------|---------------------|
| 0.717800776509011  |                     |                     |
| ZNF726             | 3.00648200206315 2  | 0.222408165693591   |
| 1.77488665588193   |                     |                     |
| ZNF254             | 1.17383741759474 2  | 0.556037962715361   |
| 0.44452777885157   |                     |                     |
| AC092279.1         | 4.94987931633444 2  | 0.0841680689596223  |
| 1.49450978176452   |                     |                     |
| LINC00662          | 3.78600990163169 2  | 0.150618526867253   |
| 0.695677726370958  |                     |                     |
| AC006504.5         | 0.183494918719708   | 2 0.912335522251448 |
| 0.243216356466223  |                     |                     |
| UQCRFS1            | 1.28583265477296 2  | 0.525756906829873   |
| 0.101203618227178  |                     |                     |
| POP4               | 0.117201777680309   | 2 0.94308308904087  |
| 0.0563590173011201 |                     |                     |
| PLEKHF1            | 0.00491489682426451 | 2 0.997545568642292 |
| 0.0721603436448515 |                     |                     |
| C19orf12           | 0.00228887679532808 | 2 0.998856216222211 |
| 0.0174142396844013 |                     |                     |
| URI1               | 4.06748030908994 2  | 0.130845223468257   |
| 0.359112687029181  |                     |                     |
| ZNF507             | 0.00775388541129299 | 2 0.996130562933947 |
| 0.0518384276086996 |                     |                     |
| AC007773.1         | 2.23369023475792 2  | 0.327310794563436   |
| 1.4891672808963    |                     |                     |
| DPY19L3            | 4.47107090567513 2  | 0.106934855948693   |
| 3.53266458607085   |                     |                     |
| PDCD5              | 0.00732355916991995 | 2 0.996344916554149 |
| 0.01237074615595   |                     |                     |
| ANKRD27            | 2.90142633915617 2  | 0.234403059338725   |
| 0.689145577948745  |                     |                     |
| AC008736.1         | 1.53542729823249 2  | 0.464072889749316   |
| 1.12993921717044   |                     |                     |
| NUDT19             | 0.756823086146166   | 2 0.684948556819854 |
| 0.474420590455874  |                     |                     |
| CEP89              | 0.0528234009428566  | 2 0.97393403795527  |
| 0.0858016647568466 |                     |                     |
| FAAP24             | 2.74779777089989 2  | 0.253118154496887   |
| 1.06278284010188   |                     |                     |
| GPATCH1            | 1.84782676901829 2  | 0.396962530441296   |
| 0.561331539873844  |                     |                     |
| CEBPG              | 1.15033428870363 2  | 0.562610823726168   |
| 0.254430134628463  |                     |                     |
| PEPD               | 2.5756662820823 2   | 0.275867902755612   |
| 0.256578601134323  |                     |                     |
| LSM14A             | 0.0199784894312973  | 2 0.990060482073915 |
| 0.012499393795016  |                     |                     |
| KIAA0355           | 2.32471155886999 2  | 0.312748545778469   |
| 0.201065356756581  |                     |                     |
| GPI                | 3.49967638032413 2  | 0.173802064059106   |

|                                |   |                      |  |
|--------------------------------|---|----------------------|--|
| 0.408434864972235              |   |                      |  |
| PDCD2L 5.72307559269722        | 2 | 0.0571807602554307   |  |
| 0.682845586581229              |   |                      |  |
| UBA2 3.94825803194946          | 2 | 0.138882223777608    |  |
| 0.255006147828754              |   |                      |  |
| ZNF302 3.45023720838119        | 2 | 0.178151920955434    |  |
| 0.513606321593779              |   |                      |  |
| AC020910.4 0.00415946813955448 | 2 | 0.997922427078659    |  |
| 0.0540803167281457             |   |                      |  |
| ZNF181 0.385428690589388       | 2 | 0.824717524935956    |  |
| 0.318026423874656              |   |                      |  |
| ZNF599 0.201772461472805       | 2 | 0.904035878531583    |  |
| 0.48048106775436               |   |                      |  |
| ZNF792 0.847123539395941       | 2 | 0.654710733133141    |  |
| 0.412906381912686              |   |                      |  |
| GRAMD1A 0.123070794006135      | 2 | 0.940319660652424    |  |
| 0.0707427668146218             |   |                      |  |
| SCN1B 1.86344704198952         | 2 | 0.393874274447445    |  |
| 1.49783100554908               |   |                      |  |
| FXVD5 0.0761167969648374       | 2 | 0.962656721558025    |  |
| 0.0460111454626948             |   |                      |  |
| LSR 0.865308645588582          | 2 | 0.648784723137114    |  |
| 0.351490461647298              |   |                      |  |
| USF2 6.48691029070939          | 2 | 0.0390288116496262   |  |
| 0.357404788466072              |   |                      |  |
| CD22 51.9071499641122          | 2 | 5.35183009020557e-12 |  |
| 0.631952696110898              |   |                      |  |
| FFAR1 1.76413239646548         | 2 | 0.413926772743457    |  |
| 0.445534226969248              |   |                      |  |
| TMEM147 8.20106593787145       | 2 | 0.0165638450339551   |  |
| 0.428270905839962              |   |                      |  |
| HAUS5 0.442013276549093        | 2 | 0.801711358292428    |  |
| 0.200665910516264              |   |                      |  |
| RBM42 2.33997033710773         | 2 | 0.310371544490193    |  |
| 0.114969171914429              |   |                      |  |
| ETV2 0.000395643089548682      | 2 | 0.999802198020617    |  |
| 0.018656228998335              |   |                      |  |
| COX6B1 6.04188134631957        | 2 | 0.0487553339502359   |  |
| 0.133650864045288              |   |                      |  |
| KMT2B 3.59676893462696         | 2 | 0.165566149805338    |  |
| 0.922993023438231              |   |                      |  |
| IGFLR1 2.405514271259          | 2 | 0.300364922376343    |  |
| 0.588566826199264              |   |                      |  |
| U2AF1L4 0.676972007585448      | 2 | 0.712848756498019    |  |
| 0.215274058421852              |   |                      |  |
| PSENN 0.565002978848883        | 2 | 0.753895519088072    |  |
| 0.120468540940547              |   |                      |  |
| LIN37 0.748963494090973        | 2 | 0.68764556080444     |  |
| 0.777138261506766              |   |                      |  |
| PROSER3 0.519723756301371      | 2 | 0.771158092229777    |  |

|                                 |   |  |                     |
|---------------------------------|---|--|---------------------|
| 0.36759308371691                |   |  |                     |
| NFKBID 0.718225394439314        | 2 |  | 0.698295650938639   |
| 0.0889082356964305              |   |  |                     |
| HCST 13.3541686886782 2         |   |  | 0.00125944473162276 |
| 0.683280368146849               |   |  |                     |
| SDHAF1 0.344849495857438        | 2 |  | 0.841621620198989   |
| 0.13370398615703                |   |  |                     |
| ALKBH6 3.14267039465097 2       |   |  | 0.207767586349921   |
| 0.551933837289177               |   |  |                     |
| THAP8 4.21575446438122 2        |   |  | 0.121495599837006   |
| 1.22186456498296                |   |  |                     |
| POLR2I 6.99057036859329 2       |   |  | 0.030340094684161   |
| 0.188184403513647               |   |  |                     |
| TBCB 7.00021458191845 2         |   |  | 0.0301941436898852  |
| 0.266558844281058               |   |  |                     |
| CAPNS1 1.03851026557783 2       |   |  | 0.594963551801725   |
| 0.171031644917162               |   |  |                     |
| ZNF146 1.08458032114137 2       |   |  | 0.581415192347163   |
| 0.274947492564123               |   |  |                     |
| LINC00665 1.5017273008178 2     |   |  | 0.471958769291109   |
| 0.382997549932718               |   |  |                     |
| ZFP14 0.136001812642776 2       |   |  | 0.934259626837348   |
| 0.112063644267024               |   |  |                     |
| ZFP82 5.90662862135608 2        |   |  | 0.0521665230516137  |
| 0.49322673585048                |   |  |                     |
| ZNF566 0.123716278453766 2      |   |  | 0.940016228761822   |
| 0.204983053280842               |   |  |                     |
| ZNF260 0.000139118873070954 2   |   |  | 0.999930442982666   |
| 0.00790690594967465             |   |  |                     |
| ZNF529 1.8210088486591 2        |   |  | 0.402321232223108   |
| 1.00796779088046                |   |  |                     |
| ZNF529-AS1 0.815013762006968 2  |   |  | 0.665306873403364   |
| 0.482962984868957               |   |  |                     |
| ZNF382 2.83502506689248 2       |   |  | 0.242316020851586   |
| 1.22484037603579                |   |  |                     |
| ZNF461 1.40124134974836 2       |   |  | 0.496277181402265   |
| 1.16628256607088                |   |  |                     |
| LINC01534 1.1297046679457 2     |   |  | 0.568444080439326   |
| 0.677467229126794               |   |  |                     |
| ZNF567 2.33197639658504 2       |   |  | 0.311614572842306   |
| 0.643666234219955               |   |  |                     |
| AC020928.1 0.0433854089991825 2 |   |  | 0.978540890066361   |
| 0.210183814460973               |   |  |                     |
| ZNF790 1.69386245148323 2       |   |  | 0.428728586513265   |
| 0.644111115388587               |   |  |                     |
| ZNF345 0.642274976138908 2      |   |  | 0.725323520803838   |
| 0.423822052122289               |   |  |                     |
| ZNF568 0.530927171062591 2      |   |  | 0.766850366825893   |
| 0.380215574166324               |   |  |                     |
| ZNF420 5.17656260265054 2       |   |  | 0.0751490877940963  |

|                             |   |                                    |
|-----------------------------|---|------------------------------------|
| 1.37914877685086            |   |                                    |
| ZNF585A 2.12801043215404 2  |   | 0.345070955122011                  |
| 1.75261640123268            |   |                                    |
| ZNF585B 2.86397502389622 2  |   | 0.238833765248023                  |
| 1.93066445564519            |   |                                    |
| ZNF383 0.000724444307230083 | 2 | 0.999637843440909                  |
| 0.0154893004638771          |   |                                    |
| HKR1 2.73216617586563 2     |   | 0.25510422599649 0.870597347407908 |
| ZNF569 3.88527073975222 2   |   | 0.143325735303794                  |
| 1.01155173706952            |   |                                    |
| ZNF570 3.19859338448781 2   |   | 0.202038563326627                  |
| 2.1316113456661             |   |                                    |
| ZNF793 0.0114920007150889   | 2 | 0.994270476329056                  |
| 0.0668617831241235          |   |                                    |
| ZFP30 0.581332567772287     | 2 | 0.747765177673918                  |
| 0.514727505415177           |   |                                    |
| ZNF781 0.622402856987709    | 2 | 0.732566301280252                  |
| 0.529527627150659           |   |                                    |
| ZNF573 0.599687815597348    | 2 | 0.740933865653971                  |
| 0.448889103140142           |   |                                    |
| SIPA1L3 7.4162144889131 2   |   | 0.0245238971128429                 |
| 1.18060021565495            |   |                                    |
| SPINT2 1.00924713988259 2   |   | 0.603732795829838                  |
| 0.0863574824655272          |   |                                    |
| PPP1R14A 8.56723628813919 2 |   | 0.0137926678384793                 |
| 1.96357221610472            |   |                                    |
| YIF1B 0.584498964131288     | 2 | 0.746582253854435                  |
| 0.203296231731287           |   |                                    |
| KCNK6 1.85761489509557 2    |   | 0.395024517041461                  |
| 0.247684014518355           |   |                                    |
| PSMD8 6.12356544038662 2    |   | 0.0468041820413347                 |
| 0.101677240216862           |   |                                    |
| FAM98C 1.86600899862993 2   |   | 0.393370053058273                  |
| 0.381241526429695           |   |                                    |
| MAP4K1 0.610083673497502    | 2 | 0.737092536191304                  |
| 0.096070663055932           |   |                                    |
| EIF3K 8.03014289756753 2    |   | 0.0180416654496449                 |
| 0.1779463452431             |   |                                    |
| ACTN4 0.306629694669237     | 2 | 0.857859584483965                  |
| 0.0788881249967384          |   |                                    |
| CAPN12 0.538449243753318    | 2 | 0.763971631632055                  |
| 0.355713811586191           |   |                                    |
| ECH1 5.67094663145119 2     |   | 0.0586907400084643                 |
| 0.189437751922911           |   |                                    |
| HNRNPL 1.91386931468521 2   |   | 0.384068384604304                  |
| 0.152678117495461           |   |                                    |
| RINL 3.23940379079923 2     |   | 0.197957702390363                  |
| 0.374254136057276           |   |                                    |
| SIRT2 0.0134156883633272    | 2 | 0.993314603185927                  |
| 0.0230071130576744          |   |                                    |



|          |                     |   |                      |
|----------|---------------------|---|----------------------|
| NFKBIB   | 0.184017863092181   | 2 | 0.912097003072288    |
|          | 0.120023221522271   |   |                      |
| SARS2    | 2.92847836721499    | 2 | 0.231253866296933    |
|          | 0.442357856436412   |   |                      |
| MRPS12   | 1.81453041628533    | 2 | 0.403626550633775    |
|          | 0.178514168359425   |   |                      |
| PAK4     | 0.0602456649240524  | 2 | 0.970326338655011    |
|          | 0.11956806318712    |   |                      |
| GMFG     | 32.5214811529892    | 2 | 8.67061885623244e-08 |
|          | 0.488166022294821   |   |                      |
| SAMD4B   | 0.00396317958727699 | 2 | 0.998020372259208    |
|          | 0.0291143227782509  |   |                      |
| PAF1     | 2.01259861344414    | 2 | 0.365569339393563    |
|          | 0.29092166260336    |   |                      |
| MED29    | 1.0748399429123     | 2 | 0.584253700713747    |
|          | 0.252229998740787   |   |                      |
| ZFP36    | 0.956332589794939   | 2 | 0.619919099026887    |
|          | 0.087128535129932   |   |                      |
| PLEKHG2  | 0.233279966037175   | 2 | 0.889905516596841    |
|          | 0.147220213566824   |   |                      |
| RPS16    | 52.0143851854326    | 2 | 5.07249797720988e-12 |
|          | 0.2804480515609     |   |                      |
| SUPT5H   | 0.0789545367234212  | 2 | 0.96129180547985     |
|          | 0.0538217763723991  |   |                      |
| TIMM50   | 3.84792947565507    | 2 | 0.146026854708631    |
|          | 0.43617766478638    |   |                      |
| DLL3     | 0.0578518813083737  | 2 | 0.971488409598547    |
|          | 0.139912170398573   |   |                      |
| EID2B    | 1.09432682093346    | 2 | 0.578588703508469    |
|          | 0.541100160345717   |   |                      |
| EID2     | 0.686352092857945   | 2 | 0.709513293283232    |
|          | 0.339579810595997   |   |                      |
| DYRK1B   | 0.055260315890324   | 2 | 0.972748063424294    |
|          | 0.141515796957542   |   |                      |
| FBL      | 1.08576709081863    | 2 | 0.581070291726594    |
|          | 0.116071944937211   |   |                      |
| PSMC4    | 1.39342151109495    | 2 | 0.498221383505093    |
|          | 0.133329580854311   |   |                      |
| ZNF546   | 0.547103732215561   | 2 | 0.760672882191012    |
|          | 0.862909048768727   |   |                      |
| ZNF780B  | 1.21498988262528    | 2 | 0.544713701163858    |
|          | 0.507364405208712   |   |                      |
| ZNF780A  | 0.218781766147213   | 2 | 0.896379969253053    |
|          | 0.186414422036392   |   |                      |
| MAP3K10  | 2.17720050575981    | 2 | 0.336687441302405    |
|          | 2.36730417364295    |   |                      |
| AKT2     | 0.104988600513997   | 2 | 0.94885972929699     |
|          | 0.0822316647983868  |   |                      |
| C19orf47 | 2.37712267079253    | 2 | 0.304659251413923    |
|          | 1.05135240667093    |   |                      |

|            |                    |   |                      |
|------------|--------------------|---|----------------------|
| PLD3       | 0.113708339111907  | 2 | 0.944731829983705    |
|            | 0.0924950073496341 |   |                      |
| SERTAD1    | 0.0565714949056036 | 2 | 0.972110548997055    |
|            | 0.0655168492793023 |   |                      |
| SERTAD3    | 0.174177258677618  | 2 | 0.916595854748481    |
|            | 0.12568321049871   |   |                      |
| BLVRB      | 1.22885734945776   | 2 | 0.540949865368206    |
|            | 0.561863867597691  |   |                      |
| SHKBP1     | 0.0104323656219931 | 2 | 0.994797397847236    |
|            | 0.0104372110937873 |   |                      |
| LTBP4      | 5.86511137911344   | 2 | 0.0532607461266771   |
|            | 2.00386363574421   |   |                      |
| C0Q8B      | 2.25339446949081   | 2 | 0.324101923244027    |
|            | 0.55752005838723   |   |                      |
| ITPKC      | 0.0974415943399686 | 2 | 0.952447018481327    |
|            | 0.283473488185639  |   |                      |
| C19orf54   | 1.62023423015777   | 2 | 0.444805969686128    |
|            | 0.455669487275007  |   |                      |
| SNRPA      | 1.2617330390795    | 2 | 0.532130499696778    |
|            | 0.104820570306103  |   |                      |
| MIA-RAB4B  | 1.56681716919745   | 2 | 0.456846155595457    |
|            | 1.06767007779919   |   |                      |
| RAB4B      | 3.57345773708336   | 2 | 0.167507212567151    |
|            | 1.31362584037717   |   |                      |
| EGLN2      | 2.84034411123015   | 2 | 0.241672432220728    |
|            | 0.671385455483839  |   |                      |
| HNRNPUL1   | 3.74765548691857   | 2 | 0.153534843618127    |
|            | 0.304318351258791  |   |                      |
| TGFB1      | 0.416423538154217  | 2 | 0.812035054588244    |
|            | 0.212749732522085  |   |                      |
| CCDC97     | 3.01521987166862   | 2 | 0.221438598448345    |
|            | 0.28367826091009   |   |                      |
| TMEM91     | 0.0278160360507519 | 2 | 0.986188251633813    |
|            | 0.106385103021243  |   |                      |
| B9D2       | 0.998036523477864  | 2 | 0.60712640645362     |
|            | 0.324965940700064  |   |                      |
| EXOSC5     | 2.28831808406311   | 2 | 0.318491643287001    |
|            | 0.202541126444694  |   |                      |
| BCKDHA     | 2.06963104716753   | 2 | 0.355291917859481    |
|            | 0.927531576892351  |   |                      |
| DMAC2      | 0.0786315153919811 | 2 | 0.961447076897962    |
|            | 0.0535663648494117 |   |                      |
| LINC01480  | 24.5642470981368   | 2 | 4.63384514770571e-06 |
|            | 2.20274178765336   |   |                      |
| AC243960.1 | 0.117413760580658  | 2 | 0.942983135593826    |
|            | 0.0868346329842186 |   |                      |
| CEACAM21   | 0.84240578376332   | 2 | 0.656256938695667    |
|            | 0.350844382773764  |   |                      |
| RPS19      | 17.2495337378648   | 2 | 0.000179602071368135 |
|            | 0.0901716404994729 |   |                      |

|            |                    |   |                                     |
|------------|--------------------|---|-------------------------------------|
| CD79A      | 11.8668270221761   | 2 | 0.00264942270181512                 |
|            | 0.122293618255847  |   |                                     |
| ARHGEF1    | 0.132782090832006  | 2 | 0.935764866173966                   |
|            | 0.0410924301799862 |   |                                     |
| RABAC1     | 1.04593295134325   | 2 | 0.59275953052747 0.0857840531710195 |
| ATP1A3     | 0.46367363972064   | 2 | 0.793075526923606                   |
|            | 0.673462213165355  |   |                                     |
| ZNF574     | 0.780776543196279  | 2 | 0.676794043571666                   |
|            | 0.452704469712493  |   |                                     |
| POU2F2     | 20.4072526296356   | 2 | 3.7035771509375e-05                 |
|            | 0.318927597040227  |   |                                     |
| AC010247.2 | 1.19506018536646   | 2 | 0.550168825345421                   |
|            | 0.488817941556357  |   |                                     |
| DEDD2      | 0.498066966401941  | 2 | 0.779553870988777                   |
|            | 0.152051418417288  |   |                                     |
| ZNF526     | 1.42912697191764   | 2 | 0.489405697635182                   |
|            | 0.290568936525763  |   |                                     |
| GSK3A      | 3.97651754755612   | 2 | 0.136933650446349                   |
|            | 0.514654229309834  |   |                                     |
| ERF        | 1.06646586801557   | 2 | 0.58670512135161 0.575628274649653  |
| CIC        | 0.0774598565049686 | 2 | 0.962010485918665                   |
|            | 0.131182458081732  |   |                                     |
| PAFAH1B3   | 1.86651717879631   | 2 | 0.393270114326025                   |
|            | 0.279796574339405  |   |                                     |
| MEGF8      | 0.682825034642632  | 2 | 0.710765644582619                   |
|            | 0.743891586251722  |   |                                     |
| LIPE-AS1   | 3.7313448672438    | 2 | 0.154792087477103                   |
|            | 0.733624586820374  |   |                                     |
| LIPE       | 1.23656682727331   | 2 | 0.538868658706217                   |
|            | 0.472511397116871  |   |                                     |
| CEACAM1    | 1.10746916035136   | 2 | 0.574799163437601                   |
|            | 0.919037873921048  |   |                                     |
| PHLDB3     | 1.03411288486982   | 2 | 0.596273131576698                   |
|            | 0.818716665442446  |   |                                     |
| ETHE1      | 20.4288437440625   | 2 | 3.66381001233318e-05                |
|            | 1.52542779158568   |   |                                     |
| XRCC1      | 0.694736187705357  | 2 | 0.70654520543912                    |
|            | 0.252959577766497  |   |                                     |
| PINLYP     | 1.24291168573437   | 2 | 0.537161844826534                   |
|            | 0.884805302324324  |   |                                     |
| IRGQ       | 0.0469690999746603 | 2 | 0.976789065955708                   |
|            | 0.143764403746316  |   |                                     |
| ZNF576     | 4.27751125220294   | 2 | 0.117801340767553                   |
|            | 0.691438245482463  |   |                                     |
| ZNF428     | 25.8543834652757   | 2 | 2.43103921238053e-06                |
|            | 0.662192558588236  |   |                                     |
| SMG9       | 0.296789128534406  | 2 | 0.862090897564389                   |
|            | 0.10607504832876   |   |                                     |
| KCNN4      | 4.70631437791552   | 2 | 0.0950685385622451                  |
|            | 0.276604860911812  |   |                                     |

|          |                     |   |                    |
|----------|---------------------|---|--------------------|
| ZNF283   | 1.95247873105213    | 2 | 0.376725163932618  |
|          | 1.47197812375287    |   |                    |
| ZNF404   | 1.57589007315948    | 2 | 0.454778388656716  |
|          | 1.20196109835096    |   |                    |
| ZNF45    | 2.59248157291511    | 2 | 0.273558226323324  |
|          | 1.60466250901921    |   |                    |
| ZNF155   | 0.16920836286868    | 2 | 0.918875920578637  |
|          | 0.354625816676774   |   |                    |
| ZNF230   | 4.61392632855141    | 2 | 0.0995631498501587 |
|          | 1.212038065386      |   |                    |
| ZNF222   | 1.87360609746825    | 2 | 0.391878651845602  |
|          | 0.858766235108525   |   |                    |
| ZNF223   | 0.643560314633635   | 2 | 0.72485752743847   |
|          | 0.348192076830002   |   |                    |
| ZNF224   | 3.8976560747844     | 2 | 0.142440909223112  |
|          | 0.803469340468384   |   |                    |
| ZNF225   | 0.640266061863049   | 2 | 0.726052443215991  |
|          | 0.524430049774399   |   |                    |
| ZNF234   | 3.67539903051583    | 2 | 0.159183203744078  |
|          | 1.09308256133553    |   |                    |
| ZNF226   | 0.00217677673867678 | 2 | 0.998912203710459  |
|          | 0.0163580433789225  |   |                    |
| ZNF227   | 0.337698067629315   | 2 | 0.844636405297663  |
|          | 0.311637683427481   |   |                    |
| ZNF235   | 1.04639827510632    | 2 | 0.592621634022053  |
|          | 0.596018314977464   |   |                    |
| ZNF180   | 0.844311547617093   | 2 | 0.655631901160169  |
|          | 0.68323687341004    |   |                    |
| BCL3     | 0.429733816498574   | 2 | 0.806648791333241  |
|          | 0.217884094863219   |   |                    |
| TOMM40   | 1.14573369494347    | 2 | 0.56390648528048   |
|          | 0.0716503175557137  |   | 0.111439100120107  |
| APOC1    | 0.253934625174804   | 2 | 0.964808967116087  |
|          | 0.854230993322471   |   |                    |
| CLPTM1   | 0.175706209638414   | 2 | 0.652388199217635  |
|          | 0.00372046322360214 |   |                    |
| RELB     | 0.00141606745809538 | 2 | 0.998141497546646  |
|          | 0.483888789188803   |   |                    |
| CLASRP   | 0.164096139047748   | 2 | 0.785099832132704  |
|          | 4.22610460100832    |   |                    |
| ZNF296   | 0.12086847591223    | 2 | 0.230043441459297  |
| GEMIN7   | 4.40386534317059    | 2 | 0.110589219050413  |
|          | 0.305209349335591   |   |                    |
| MARK4    | 0.573503527207727   | 2 | 0.750698056289564  |
|          | 0.467011840781663   |   |                    |
| PPP1R37  | 0.662873289866808   | 2 | 0.717891636848467  |
|          | 0.391258615041271   |   |                    |
| TRAPPC6A | 0.934858838903327   | 2 | 0.626610953698099  |
|          | 0.111252740872712   |   |                    |
| BLOC1S3  | 1.04329039014632    | 2 | 0.593543249837253  |
|          | 0.492506256622892   |   |                    |

|          |                      |   |                      |
|----------|----------------------|---|----------------------|
| ERCC2    | 2.23222858940357     | 2 | 0.327550088144525    |
|          | 0.385538853006575    |   |                      |
| PPP1R13L | 0.0902788879975475   | 2 | 0.955864183015492    |
|          | 0.247020002104811    |   |                      |
| CD3EAP   | 0.903010353141168    | 2 | 0.636669130596256    |
|          | 0.457925113273421    |   |                      |
| ERCC1    | 2.16878656445071     | 2 | 0.338106859118793    |
|          | 0.259057270892604    |   |                      |
| FOSB     | 4.04164845090592     | 2 | 0.132546172116537    |
|          | 1.48081928083716     |   |                      |
| RTN2     | 0.109258161776259    | 2 | 0.946836282501193    |
|          | 0.0933218436212953   |   |                      |
| PPM1N    | 7.84817253074614     | 2 | 0.019760184189536    |
|          | 0.811398473288586    |   |                      |
| VASP     | 17.5868529119883     | 2 | 0.000151727189445228 |
|          | 0.542765343875031    |   |                      |
| OPA3     | 3.21447477169904     | 2 | 0.200440589904025    |
|          | 0.615266267178471    |   |                      |
| EML2     | 0.199015939573716    | 2 | 0.905282734929314    |
|          | 0.145832674525631    |   |                      |
| SNRPD2   | 28.4788182966712     | 2 | 6.54490250107109e-07 |
|          | 0.313040388697492    |   |                      |
| FBX046   | 0.793096157206845    | 2 | 0.672637936431212    |
|          | 0.438461486253291    |   |                      |
| DMWD     | 0.662236910446911    | 2 | 0.718120098925384    |
|          | 0.181173724303832    |   |                      |
| SYMPK    | 0.173162446348914    | 2 | 0.917061059149209    |
|          | 0.0941786949096592   |   |                      |
| IRF2BP1  | 0.303361609950605    | 2 | 0.859262509290475    |
|          | 0.200843481550894    |   |                      |
| MYP0P    | 0.285395126424144    | 2 | 0.867016246856141    |
|          | 0.182767941534332    |   |                      |
| CCDC61   | 0.34189503359035     | 2 | 0.842865808609682    |
|          | 0.240447056744064    |   |                      |
| PPP5C    | 0.894989804883125    | 2 | 0.639227474741432    |
|          | 0.106181549080149    |   |                      |
| PPP5D1   | 0.846123358336042    | 2 | 0.655038229652766    |
|          | 0.604841330207685    |   |                      |
| CALM3    | 0.788958874880397    | 2 | 0.674030823149147    |
|          | 0.0914390427669321   |   |                      |
| PRKD2    | 15.8768446485192     | 2 | 0.000356768900169446 |
|          | 0.611619064287776    |   |                      |
| STRN4    | 0.0166358297097174   | 2 | 0.991716583281789    |
|          | 0.0540853772230696   |   |                      |
| FKRP     | 0.113144737103595    | 2 | 0.944998093877007    |
|          | 0.18687739277871     |   |                      |
| SLC1A5   | 7.11056937676536     | 2 | 0.0285732392889958   |
|          | 0.686248062910165    |   |                      |
| AP2S1    | 2.98990133807946e-05 | 2 | 0.999985050605053    |
|          | 0.000495146263724593 |   |                      |

|           |                      |   |                      |
|-----------|----------------------|---|----------------------|
| ARHGAP35  | 0.636932606916151    | 2 | 0.727263583810539    |
|           | 0.369848447285775    |   |                      |
| NPAS1     | 0.0907816894117465   | 2 | 0.955623908287874    |
|           | 0.0759638268442454   |   |                      |
| TMEM160   | 1.72239623227432     | 2 | 0.422655388597864    |
|           | 0.113623961145442    |   |                      |
| ZC3H4     | 3.32757654566042     | 2 | 0.189420044391335    |
|           | 0.472121035598703    |   |                      |
| SAE1      | 0.892698911101839    | 2 | 0.639960095373698    |
|           | 0.16510191323824     |   |                      |
| BBC3      | 5.11183790796906     | 2 | 0.07762086927566     |
| CCDC9     | 4.52253342791216e-05 | 2 | 0.511870539075108    |
|           | 0.0038604542396292   |   | 0.999977387588525    |
| INAFM1    | 3.69434480382539     | 2 | 0.157682398997244    |
|           | 0.734127077822653    |   |                      |
| DHX34     | 0.0466635040065677   | 2 | 0.976938328759062    |
|           | 0.11387533586445     |   |                      |
| KPTN      | 1.64850956030988     | 2 | 0.438561695595841    |
|           | 0.663443838680588    |   |                      |
| NAPA-AS1  | 4.00690113469169     | 2 | 0.134869104480675    |
|           | 0.946913901545208    |   |                      |
| NAPA      | 11.0002827921375     | 2 | 0.00408619362590001  |
|           | 0.290397178023687    |   |                      |
| BICRA     | 3.29788477325436     | 2 | 0.192253130618569    |
|           | 17.0116206126615     |   |                      |
| NOP53     | 23.6773349621236     | 2 | 7.21991425578494e-06 |
|           | 0.320939772307663    |   |                      |
| SELENOW   | 8.01055188247266     | 2 | 0.0182192611195354   |
|           | 0.494503230892635    |   |                      |
| LIG1      | 0.112271225985766    | 2 | 0.945410917192547    |
|           | 0.110069400538526    |   |                      |
| ZSWIM9    | 0.335200751250982    | 2 | 0.845691726192428    |
|           | 0.193115544033543    |   |                      |
| CARD8     | 2.03561034228933     | 2 | 0.361387253530903    |
|           | 0.224161796798922    |   |                      |
| CARD8-AS1 | 3.03351654781104     | 2 | 0.219422041424558    |
|           | 0.754165612907432    |   |                      |
| EMP3      | 10.4618856591448     | 2 | 0.0053484802193885   |
|           | 0.666314317422503    |   |                      |
| TMEM143   | 0.13670776526401     | 2 | 0.933929913515028    |
|           | 0.369863462541627    |   |                      |
| KDELR1    | 5.57464359887808     | 2 | 0.0615859327211044   |
|           | 0.469272660826175    |   |                      |
| GRWD1     | 0.256638919813698    | 2 | 0.879572346157878    |
|           | 0.100957060450234    |   |                      |
| CYTH2     | 1.46749749700112     | 2 | 0.480105816420174    |
|           | 0.166282264705741    |   |                      |
| RPL18     | 10.146409457789      | 2 | 0.00626231891414308  |
|           | 0.114503576307357    |   |                      |
| SPHK2     | 0.326116729881203    | 2 | 0.849541603522367    |

|                    |                     |   |                      |
|--------------------|---------------------|---|----------------------|
| 0.155465411483277  |                     |   |                      |
| DBP                | 8.41455567215228    | 2 | 0.0148868376434282   |
| 1.18679203255357   |                     |   |                      |
| CA11               | 0.600323407070874   | 2 | 0.740698437441265    |
| 0.402171333587488  |                     |   |                      |
| BCAT2              | 3.74520503289849    | 2 | 0.153723073944402    |
| 0.57462111307777   |                     |   |                      |
| PLEKHA4            | 0.0533680009444399  | 2 | 0.973668871819972    |
| 0.139111840463447  |                     |   |                      |
| PPP1R15A           | 1.57654261501996    | 2 | 0.454630031892362    |
| 0.099847528516488  |                     |   |                      |
| NUCB1              | 4.67659768278387    | 2 | 0.0964916462837666   |
| 0.202816286603518  |                     |   |                      |
| BAX                | 3.37534185459554    | 2 | 0.184949784238548    |
| 0.196023275380057  |                     |   |                      |
| FTL                | 42.6002764851063    | 2 | 5.61652280239855e-10 |
| 0.293065969592076  |                     |   |                      |
| GYS1               | 0.0130427465320141  | 2 | 0.993499844740063    |
| 0.0621984869808803 |                     |   |                      |
| RUVBL2             | 3.81219209856857    | 2 | 0.148659615030667    |
| 0.219657168250583  |                     |   |                      |
| SNRNP70            | 2.74108339927396    | 2 | 0.253969347180707    |
| 0.174228050293734  |                     |   |                      |
| LIN7B              | 2.84268544651768    | 2 | 0.241389679660866    |
| 1.55245692565524   |                     |   |                      |
| C19orf73           | 0.9799762786792     | 2 | 0.61263366038112     |
| 0.0691977353088889 |                     |   |                      |
| SLC6A16            | 1.65850214948389    | 2 | 0.436375976963986    |
| 0.446933067335376  |                     |   |                      |
| AC011450.1         | 0.00403201996237033 | 2 | 0.997986020802015    |
| 0.0501576601334776 |                     |   |                      |
| CD37               | 110.998347045103    | 2 | 0.431294562272292    |
| PIH1D1             | 9.2811431589158     | 2 | 0.00965217906326254  |
| 0.421377539633648  |                     |   |                      |
| ALDH16A1           | 10.4901023369134    | 2 | 0.00527355184820411  |
| 0.948239888351922  |                     |   |                      |
| RPL13A             | 53.8714054357348    | 2 | 2.00439664865826e-12 |
| 0.244598281394354  |                     |   |                      |
| RPS11              | 30.653238220809     | 2 | 2.20665223316097e-07 |
| 0.219462586491361  |                     |   |                      |
| FCGRT              | 2.84765867514755    | 2 | 0.240790182296211    |
| 0.421126814670627  |                     |   |                      |
| NOSIP              | 0.0344768685340811  | 2 | 0.982909297435149    |
| 0.0243887854536251 |                     |   |                      |
| PRRG2              | 3.14201106877888    | 2 | 0.207836090913539    |
| 5.93752857079329   |                     |   |                      |
| PRR12              | 2.2819408562049     | 2 | 0.319508810992831    |
| 1.29136073102496   |                     |   |                      |
| SCAF1              | 0.768077774398763   | 2 | 0.681104940400935    |
| 0.301752597946877  |                     |   |                      |
| IRF3               | 11.3473386999322    | 2 | 0.00343523703465687  |

|                              |   |                      |
|------------------------------|---|----------------------|
| 0.492530696447624            |   |                      |
| BCL2L12 23.6231573481512 2   |   | 7.41816620086766e-06 |
| 1.07366565088723             |   |                      |
| PRMT1 27.2210953566511 2     |   | 1.22747949959923e-06 |
| 0.399093845521846            |   |                      |
| AP2A1 0.11757200651258 2     |   | 0.942908526922955    |
| 0.105030139470936            |   |                      |
| FUZ 1.78804397482076 2       |   | 0.409007417498603    |
| 0.661932914492127            |   |                      |
| MED25 6.92639325608949 2     |   | 0.0313294531701154   |
| 0.491103883051022            |   |                      |
| PTOV1 0.93412213648708 2     |   | 0.626841809115243    |
| 0.0921685704234585           |   |                      |
| PNKP 1.07649822085255 2      |   | 0.583769473975416    |
| 0.185967595687384            |   |                      |
| AKT1S1 0.000103848630110818  | 2 | 0.999948077032988    |
| 0.00367797710890057          |   |                      |
| TBC1D17 6.13311223591593 2   |   | 0.0465812994402612   |
| 0.836443632573614            |   |                      |
| IL4I1 10.8756540350931 2     |   | 0.00434892314436863  |
| 3.60782541240779             |   |                      |
| NUP62 0.77551200638445 2     |   | 0.678577893906309    |
| 0.178670643490341            |   |                      |
| ATF5 6.55051328984124 2      |   | 0.0378071649672516   |
| 1.14372982437907             |   |                      |
| VRK3 2.89958352629315 2      |   | 0.234619139358637    |
| 0.273746528025553            |   |                      |
| KCNC3 4.50773382139249 2     |   | 0.104992442175495    |
| 2.48092948621899             |   |                      |
| NR1H2 0.5914469417112 2      |   | 0.743993135361992    |
| 0.122087087581729            |   |                      |
| NAPSA 0.0853248858198689     | 2 | 0.958234794429049    |
| 0.217584262481093            |   |                      |
| POLD1 0.123271320401544      | 2 | 0.940225385922604    |
| 0.132254327903823            |   |                      |
| SPIB 55.1535837450952 2      |   | 1.05571107411606e-12 |
| 0.526337442949822            |   |                      |
| FAM71E1 1.96620544604429 2   |   | 0.374148417136938    |
| 1.6544464773708              |   |                      |
| EMC10 5.25453675401524 2     |   | 0.072275622584743    |
| 0.352051236919726            |   |                      |
| JOSD2 1.25659471809948 2     |   | 0.533499386043534    |
| 0.250795794548758            |   |                      |
| C19orf81 13.2390897551425 2  |   | 0.00133403795806586  |
| 2.2405547035219              |   |                      |
| CLEC11A 1.39267473113023 2   |   | 0.498407449114047    |
| 0.521701625511866            |   |                      |
| C19orf48 4.9442761717237 2   |   | 0.0844042025087749   |
| 0.323347521793925            |   |                      |
| LINC01869 3.50512308393501 2 |   | 0.17332938382359     |



|                                  |   |                     |
|----------------------------------|---|---------------------|
| 2.4376010429731                  |   |                     |
| KLK1 23.9195732920707 2          |   | 6.3963269524292e-06 |
| 2.12779665337758                 |   |                     |
| CTU1 10.6546660911589 2          |   | 0.00485700616858364 |
| 1.25926091588068                 |   |                     |
| ETFB 6.34423473703506 2          |   | 0.0419147548975058  |
| 0.322575941598762                |   |                     |
| SIGLEC10 7.02002735667176 2      |   | 0.0298965054996856  |
| 0.985589270717286                |   |                     |
| ZNF649 0.204522858733631         | 2 | 0.902793504081198   |
| 0.44622683668934                 |   |                     |
| ZNF613 1.64166219966233 2        |   | 0.440065763899171   |
| 0.590414510320526                |   |                     |
| ZNF350 3.23400752540793 2        |   | 0.198492539746152   |
| 0.688579106085643                |   |                     |
| ZNF614 0.0216244166211407        | 2 | 0.98924603351712    |
| 0.140937043159286                |   |                     |
| ZNF432 1.18929908147141 2        |   | 0.551755899954758   |
| 0.346835956370475                |   |                     |
| ZNF616 7.78450401422587 2        |   | 0.0203993547789921  |
| 2.5422478220579                  |   |                     |
| ZNF836 3.23269501280345 2        |   | 0.198622844478282   |
| 1.26225088866706                 |   |                     |
| PPP2R1A 11.2366002476691 2       |   | 0.00363080778980718 |
| 0.317635541286487                |   |                     |
| ZNF766 5.37846890733023 2        |   | 0.067932925272375   |
| 0.79357459051144                 |   |                     |
| ZNF480 11.8654429582573 2        |   | 0.00265125682156031 |
| 1.02158622442956                 |   |                     |
| ZNF880 3.30973374699068 2        |   | 0.191117496816315   |
| 0.505083554443174                |   |                     |
| ZNF528 0.801941446764076         | 2 | 0.669669666413928   |
| 0.765422168414814                |   |                     |
| ZNF808 2.79815100154215 2        |   | 0.246825048060176   |
| 1.32205174448237                 |   |                     |
| ZNF701 1.98046293785253 2        |   | 0.371490692517724   |
| 0.606136043600494                |   |                     |
| ZNF83 0.618280362785213          | 2 | 0.734077858756787   |
| 0.281869097998026                |   |                     |
| ZNF611 1.49870169912479 2        |   | 0.472673289243733   |
| 0.940328668919615                |   |                     |
| ZNF600 5.09816493890364 2        |   | 0.0781533411920222  |
| 1.05198506561284                 |   |                     |
| ZNF28 0.128310734235872          | 2 | 0.93785927571798    |
| 0.194565135265502                |   |                     |
| ZNF468 0.00110567342821695       | 2 | 0.999447316071951   |
| 0.0190981428438668               |   |                     |
| ZNF816-ZNF321P 0.365826541940906 | 2 | 0.832840384043176   |
| 0.531166128227108                |   |                     |
| ZNF816 1.4952926069644 2         |   | 0.473479669707211   |

|                              |   |                                    |
|------------------------------|---|------------------------------------|
| 1.164483194213               |   |                                    |
| ZNF160 0.0492799126032674    | 2 | 0.975661129439126                  |
| 0.114653579853243            |   |                                    |
| ZNF415 11.5689655415538 2    |   | 0.00307490039297453                |
| 1.74235031938113             |   |                                    |
| ZNF347 0.00255173677378824   | 2 | 0.998724945187135                  |
| 0.0367302944209113           |   |                                    |
| ZNF677 0.0836197951782849    | 2 | 0.95905208135683                   |
| 0.213407164828871            |   |                                    |
| ZNF845 3.0515147298842 2     |   | 0.217456300704246                  |
| 2.3405176045087              |   |                                    |
| ZNF525 0.0369170069588142    | 2 | 0.981710811329468                  |
| 0.162702439863455            |   |                                    |
| ZNF765 0.219765619442587     | 2 | 0.895939124500255                  |
| 0.346729975290631            |   |                                    |
| ZNF761 0.456136707484449     | 2 | 0.796069843622815                  |
| 0.30296368846477             |   |                                    |
| ZNF331 1.03122525347602 2    |   | 0.597134661879533                  |
| 0.576941940034236            |   |                                    |
| MYADM 1.44846327190528 2     |   | 0.484696849546596                  |
| 0.540891738432068            |   |                                    |
| NDUFA3 4.13407804295536 2    |   | 0.12655996880108 0.107596918261101 |
| TFPT 0.837967039053322       | 2 | 0.657715034633591                  |
| 0.167036246100721            |   |                                    |
| PRPF31 0.0120306552689208    | 2 | 0.9940027282267                    |
| 0.0144499942831666           |   |                                    |
| CNOT3 0.176259928404355      | 2 | 0.91564186832518                   |
| 0.0889959939285608           |   |                                    |
| LENG1 0.0820394939527067     | 2 | 0.959810176411805                  |
| 0.0663545261157988           |   |                                    |
| MBOAT7 5.33627102960737 2    |   | 0.069381465504022                  |
| 1.42665028869323             |   |                                    |
| TSEN34 3.22532681000702 2    |   | 0.199355940748671                  |
| 0.455678865903983            |   |                                    |
| RPS9 27.5560609174689 2      |   | 1.03819133612237e-06               |
| 0.192335254092903            |   |                                    |
| LENG8-AS1 0.0014367940973575 | 2 | 0.999281860936699                  |
| 0.0315618338827402           |   |                                    |
| LENG8 0.130974323625561      | 2 | 0.936611071070725                  |
| 0.119172958410742            |   |                                    |
| LILRB1 7.59516294048524 2    |   | 0.0224249417128959                 |
| 0.513174658192225            |   |                                    |
| NLRP7 0.459292891941295      | 2 | 0.794814562724337                  |
| 0.727942405088247            |   |                                    |
| NLRP2 0.00111521131785508    | 2 | 0.999442549774216                  |
| 0.0170694249708901           |   |                                    |
| RDH13 1.64893936857187 2     |   | 0.438467457002257                  |
| 0.7472786538088              |   |                                    |
| PPP1R12C 0.00172583126276841 | 2 | 0.999137456573241                  |
| 0.0157596123525325           |   |                                    |

|                            |   |                                    |
|----------------------------|---|------------------------------------|
| TMEM86B 0.945725996499561  | 2 | 0.623215446936204                  |
| 0.797138607663042          |   |                                    |
| PPP6R1 1.93104950738802 2  |   | 0.380783329843737                  |
| 0.255418147425538          |   |                                    |
| HSPBP1 3.0268336111439 2   |   | 0.2201564595618 0.35083713606225   |
| KMT5C 0.00835813072528025  | 2 | 0.995829654779435                  |
| 0.0431871543611882         |   |                                    |
| RPL28 53.596005522504 2    |   | 2.30027108472086e-12               |
| 0.245173729642077          |   |                                    |
| UBE2S 1.56649441550252 2   |   | 0.45691988593685 0.161631210443628 |
| ISOC2 10.435919720647 2    |   | 0.00541837209390361                |
| 0.704274605548981          |   |                                    |
| ZNF628 2.34722545316392 2  |   | 0.309247693352307                  |
| 0.631769846411522          |   |                                    |
| NAT14 0.344278682160757    | 2 | 0.841861859054382                  |
| 0.283230254148133          |   |                                    |
| ZNF579 2.54953721928381 2  |   | 0.279495633334361                  |
| 1.3529276967217            |   |                                    |
| FIZ1 2.27447806687687 2    |   | 0.320703251543945                  |
| 0.939303095112619          |   |                                    |
| ZNF524 1.23029152254791 2  |   | 0.540562096546709                  |
| 0.288684620314089          |   |                                    |
| ZNF865 4.45099273692529 2  |   | 0.108013790687092                  |
| 2.38256077323032           |   |                                    |
| ZNF784 0.396538484575019   | 2 | 0.820149004614183                  |
| 0.4115705880707            |   |                                    |
| ZNF580 8.22690693793546 2  |   | 0.016351208516835                  |
| 0.32412007477833           |   |                                    |
| ZNF581 19.2023420001989 2  |   | 6.76494725517784e-05               |
| 0.283488146256778          |   |                                    |
| CCDC106 2.71844878265193 2 |   | 0.256859922497968                  |
| 0.353449784108444          |   |                                    |
| U2AF2 1.58472418142168 2   |   | 0.452774037818242                  |
| 0.13837389783656           |   |                                    |
| EPN1 1.71308364467941 2    |   | 0.424627985192897                  |
| 0.259112456014863          |   |                                    |
| NLRP11 3.83738843942642 2  |   | 0.146798523652817                  |
| 1.69023168743247           |   |                                    |
| NLRP4 8.41610277825813 2   |   | 0.0148753263375977                 |
| 0.770700391458467          |   |                                    |
| ZNF787 1.36646523348352 2  |   | 0.504981937970349                  |
| 0.448588646110534          |   |                                    |
| ZNF444 1.40575995014076 2  |   | 0.495157207923506                  |
| 0.130043016318318          |   |                                    |
| ZSCAN5A 0.474703282146342  | 2 | 0.788713895048608                  |
| 0.355394983552628          |   |                                    |
| ZNF582 0.275565267021784   | 2 | 0.8712880599905                    |
| 0.521691995017001          |   |                                    |
| ZNF583 2.21803576374675 2  |   | 0.329882785895736                  |
| 1.86523057467989           |   |                                    |

|            |                      |   |                     |
|------------|----------------------|---|---------------------|
| ZNF71      | 5.66795728631669     | 2 | 0.0587785290390906  |
|            | 0.727130318818758    |   |                     |
| ZNF264     | 0.096307867332635    | 2 | 0.952987078991115   |
|            | 0.157610785832523    |   |                     |
| AURKC      | 1.96527188368665     | 2 | 0.374323103343088   |
|            | 1.59207940634425     |   |                     |
| ZNF805     | 2.1312513303849      | 2 | 0.34451223800661    |
| ZNF460     | 2.21611444973298     | 2 | 0.590866027744055   |
|            | 1.47659072460608     |   | 0.330199842372338   |
| AC005261.1 | 2.97660235227672     | 2 | 0.225755849381693   |
|            | 0.980607211098143    |   |                     |
| ZNF543     | 0.00295773975953938  | 2 | 0.998522223109428   |
|            | 0.0429692915464466   |   |                     |
| ZNF304     | 1.52993798559735     | 2 | 0.465348359900895   |
|            | 1.24234218948638     |   |                     |
| TRAPPC2B   | 0.508359222483328    | 2 | 0.775552491589999   |
|            | 0.167715635732975    |   |                     |
| ZNF548     | 0.137190017162546    | 2 | 0.933704745926047   |
|            | 0.236022243286904    |   |                     |
| ZNF17      | 0.613198053701062    | 2 | 0.735945636192269   |
|            | 0.410126545835646    |   |                     |
| ZNF419     | 0.140755126292548    | 2 | 0.932041848811576   |
|            | 0.256497546011278    |   |                     |
| ZNF773     | 12.2798775127894     | 2 | 0.00215505559763052 |
|            | 1.30635544323233     |   |                     |
| ZNF549     | 0.741857359191971    | 2 | 0.690093157526519   |
|            | 0.65934320468342     |   |                     |
| ZNF550     | 3.62902946975503     | 2 | 0.162916947123576   |
|            | 4.08388446067636     |   |                     |
| ZNF416     | 0.0807530573962068   | 2 | 0.960427742454514   |
|            | 0.275668760927098    |   |                     |
| ZNF134     | 0.8391216993504      | 2 | 0.65733542550539    |
| ZNF211     | 2.77418258215341     | 2 | 0.261314956203176   |
|            | 1.11976173085838     |   | 0.249800846876881   |
| ZNF551     | 0.244777414649956    | 2 | 0.884804371709466   |
|            | 0.42979268050753     |   |                     |
| ZNF154     | 0.381841233906153    | 2 | 0.82619817167628    |
|            | 0.513842233852019    |   |                     |
| ZNF671     | 2.1892503410326      | 2 | 0.334665025760623   |
|            | 0.617777830688118    |   |                     |
| ZNF776     | 1.89737990350271     | 2 | 0.387248004867505   |
|            | 1.0323310792035      |   |                     |
| ZNF586     | 0.0088255143556283   | 2 | 0.995596964729745   |
|            | 0.0443676193571153   |   |                     |
| ZNF552     | 0.000257509228256705 | 2 | 0.999871253674391   |
|            | 0.00647125320840732  |   |                     |
| ZNF587B    | 1.27200798549523     | 2 | 0.529403703929098   |
|            | 1.02800536227965     |   |                     |
| ZNF814     | 0.0161589033900794   | 2 | 0.991953099350947   |
|            | 0.034280722470843    |   |                     |

|            |                     |   |                      |
|------------|---------------------|---|----------------------|
| ZNF587     | 0.115089866262788   | 2 | 0.94407946898654     |
|            | 0.122991162374502   |   |                      |
| ZNF417     | 0.00941781028341508 | 2 | 0.995302164370199    |
|            | 0.0913462070139221  |   |                      |
| ZNF256     | 4.06590949084999    | 2 | 0.130948030867723    |
|            | 3.00222312988485    |   |                      |
| ZNF606     | 1.22889608739449    | 2 | 0.540939387828846    |
|            | 0.633681572591448   |   |                      |
| ZSCAN18    | 3.59033796619661    | 2 | 0.166099381986997    |
|            | 0.795317732224385   |   |                      |
| ZNF329     | 1.88610927995263    | 2 | 0.389436428542618    |
|            | 1.48994117310125    |   |                      |
| ZNF274     | 0.334660183874208   | 2 | 0.845920333764479    |
|            | 0.193449122529378   |   |                      |
| ZNF544     | 0.565499315275467   | 2 | 0.753708449397427    |
|            | 0.192351529328782   |   |                      |
| AC020915.3 | 0.281472018352366   | 2 | 0.868718615172214    |
|            | 0.360710719933834   |   |                      |
| ERVK3-1    | 0.0104380686853083  | 2 | 0.994794561155008    |
|            | 0.0387323029846257  |   |                      |
| AC010642.2 | 2.4529747478529     | 2 | 0.293321097555656    |
|            | 0.306567143990265   |   |                      |
| A1BG       | 2.9068148752032     | 2 | 0.233772364683078    |
|            | 0.253260750198766   |   |                      |
| A1BG-AS1   | 1.72537015813864    | 2 | 0.422027382728378    |
|            | 0.607777694600311   |   |                      |
| ZNF837     | 7.13426879037717    | 2 | 0.028236652944164    |
|            | 1.3566669120964     |   |                      |
| RPS5       | 37.1596568744917    | 2 | 8.5287038542603e-09  |
|            | 0.204927722954907   |   |                      |
| ZNF584     | 0.371699185874595   | 2 | 0.830398483386407    |
|            | 0.373405888493042   |   |                      |
| AC012313.1 | 0.102854360966112   | 2 | 0.949872816723496    |
|            | 0.338065378459457   |   |                      |
| ZNF324B    | 1.09840897546503    | 2 | 0.577408963639178    |
|            | 0.763953697512049   |   |                      |
| ZNF324     | 1.12927140138424    | 2 | 0.568567237684882    |
|            | 0.574240389927524   |   |                      |
| ZNF446     | 0.820581184181133   | 2 | 0.663457426640576    |
|            | 0.784356025285598   |   |                      |
| SLC27A5    | 3.34710612188538    | 2 | 0.187579399174467    |
|            | 0.780056905598435   |   |                      |
| ZBTB45     | 0.492561927516623   | 2 | 0.781702563978283    |
|            | 0.305342455608335   |   |                      |
| TRIM28     | 2.9637132846985     | 2 | 0.227215438715877    |
|            | 0.264761296590389   |   |                      |
| CHMP2A     | 15.6425131951984    | 2 | 0.000401117322916034 |
|            | 0.395488708012712   |   |                      |
| UBE2M      | 0.925269816129733   | 2 | 0.629622460633969    |
|            | 0.225269929633283   |   |                      |

|            |                    |   |                                    |
|------------|--------------------|---|------------------------------------|
| MZF1       | 0.30111850747098   | 2 | 0.860226756848542                  |
|            | 0.187071383722813  |   |                                    |
| RPS4Y1     | 5.87499812534945   | 2 | 0.0529981080797987                 |
|            | 0.205137080135694  |   |                                    |
| ZFY        | 1.32724140098786   | 2 | 0.514983354348615                  |
|            | 0.483842085847662  |   |                                    |
| TTY15      | 0.134344783457692  | 2 | 0.935033995314901                  |
|            | 0.132847428192114  |   |                                    |
| USP9Y      | 7.06071791819352   | 2 | 0.0292943984886778                 |
|            | 1.54891252543053   |   |                                    |
| DDX3Y      | 1.62912308724947   | 2 | 0.442833447949971                  |
|            | 0.412696215217016  |   |                                    |
| UTY        | 0.0498917031460955 | 2 | 0.975362724955716                  |
|            | 0.072497129731418  |   |                                    |
| TMSB4Y     | 1.64333262194782   | 2 | 0.43969836951692 0.938130047642815 |
| KDM5D      | 0.556789063804985  | 2 | 0.75699810268952                   |
|            | 0.259826775469222  |   |                                    |
| EIF1AY     | 2.11445191373806   | 2 | 0.347418227967731                  |
|            | 0.180616134216517  |   |                                    |
| IL17RA     | 0.776851935410312  | 2 | 0.678123423054802                  |
|            | 0.536109343107813  |   |                                    |
| HDHD5      | 0.892371680885447  | 2 | 0.640064811080246                  |
|            | 0.228707054717694  |   |                                    |
| ADA2       | 1.18427512799183   | 2 | 0.553143640197368                  |
|            | 0.622778800064681  |   |                                    |
| ATP6V1E1   | 7.00672948282389   | 2 | 0.030095947783832                  |
|            | 0.24210762513019   |   |                                    |
| BCL2L13    | 0.743704124205024  | 2 | 0.689456231685331                  |
|            | 0.216043477355676  |   |                                    |
| BID        | 3.03022530406622   | 2 | 0.219783424403528                  |
|            | 0.184443460693281  |   |                                    |
| LINC00528  | 0.127737685345255  | 2 | 0.938128033827779                  |
|            | 0.202760336208869  |   |                                    |
| MICAL3     | 0.764071494647422  | 2 | 0.682470656269857                  |
|            | 0.213496840929383  |   |                                    |
| AC016027.1 | 1.10967830879508   | 2 | 0.574164605621541                  |
|            | 1.13913039707297   |   |                                    |
| PEX26      | 1.29312995357219   | 2 | 0.52384209956188 0.424013207696272 |
| AC008079.2 | 0.268355015456946  | 2 | 0.874434831885532                  |
|            | 0.447185954545012  |   |                                    |
| TMEM191B   | 0.616927338163441  | 2 | 0.734574639485577                  |
|            | 0.587029881569288  |   |                                    |
| DGCR2      | 0.662991888151545  | 2 | 0.717849067752256                  |
|            | 0.359375505852191  |   |                                    |
| ESS2       | 4.11577453666804   | 2 | 0.127723530587409                  |
|            | 0.368820441635693  |   |                                    |
| SLC25A1    | 0.0269493019455178 | 2 | 0.986615725749657                  |
|            | 0.0298354006174685 |   |                                    |
| HIRA       | 1.44727593741942   | 2 | 0.4849846836193 0.768090669482026  |
| C22orf39   | 0.0339573734799559 | 2 | 0.9831646388552                    |

|                              |   |                    |  |
|------------------------------|---|--------------------|--|
| 0.0340427955492216           |   |                    |  |
| MRPL40 1.75142358642485 2    |   | 0.416565405698816  |  |
| 0.124082571634342            |   |                    |  |
| UFD1 14.5598631399103 2      |   | 0.0006892327263055 |  |
| 0.314030334241703            |   |                    |  |
| CDC45 0.360711780469876      | 2 | 0.83497299978999   |  |
| 0.655169901486016            |   |                    |  |
| GNB1L 0.0414633170125394     | 2 | 0.979481764907642  |  |
| 0.0543247420944522           |   |                    |  |
| RTL10 1.00015615724974 2     |   | 0.606483304481521  |  |
| 0.550577003311906            |   |                    |  |
| TXNRD2 0.483060131548035     | 2 | 0.785425189017748  |  |
| 0.201924186204118            |   |                    |  |
| COMT 0.313172408150343       | 2 | 0.855057805058487  |  |
| 0.0968461093337744           |   |                    |  |
| TANG02 2.0233521512516 2     |   | 0.363609032319061  |  |
| 0.46865349460172             |   |                    |  |
| DGCR8 0.15904573255343 2     |   | 0.923556901419486  |  |
| 0.233919118380265            |   |                    |  |
| TRMT2A 0.485748332506112     | 2 | 0.784370207804145  |  |
| 0.0987936839695888           |   |                    |  |
| RANBP1 1.77479561206003 2    |   | 0.411725750242622  |  |
| 0.13498090524425             |   |                    |  |
| ZDHC8 1.223441497458 2       |   | 0.542416702720426  |  |
| 0.94202856537291             |   |                    |  |
| DGCR6L 5.04571681124715 2    |   | 0.0802299489410826 |  |
| 0.566126565977794            |   |                    |  |
| KLHL22 5.05041104121695 2    |   | 0.0800418608442278 |  |
| 0.929741357381634            |   |                    |  |
| MED15 1.45732324247255 2     |   | 0.482554398652804  |  |
| 0.331351816833446            |   |                    |  |
| PI4KA 0.258748580717817      | 2 | 0.878645035626037  |  |
| 0.198268145569834            |   |                    |  |
| SNAP29 0.924507253806227     | 2 | 0.629862569588827  |  |
| 0.16190477334389             |   |                    |  |
| CRKL 0.0113641152471881      | 2 | 0.994334054734265  |  |
| 0.0434527880318575           |   |                    |  |
| AC002470.1 0.506349509515387 | 2 | 0.776332202222866  |  |
| 0.651937242810737            |   |                    |  |
| LZTR1 2.9705695560645 2      |   | 0.226437846969222  |  |
| 1.15349787209452             |   |                    |  |
| THAP7 0.313666065861505      | 2 | 0.854846778163844  |  |
| 0.055371669730735            |   |                    |  |
| THAP7-AS1 6.12334513974569 2 |   | 0.0468093378209359 |  |
| 1.78812791236001             |   |                    |  |
| TMEM191C 6.27119745963925 2  |   | 0.0434737170248223 |  |
| 1.77937470548055             |   |                    |  |
| UBE2L3 8.52549641349908 2    |   | 0.0140835446848759 |  |
| 0.166260549472414            |   |                    |  |
| YDJC 1.80626875629457 2      |   | 0.405297311735313  |  |

|                               |   |                      |                   |
|-------------------------------|---|----------------------|-------------------|
| 0.125815839276056             |   |                      |                   |
| SDF2L1 15.2306199665653 2     |   | 0.000492847883987624 |                   |
| 0.483660346048222             |   |                      |                   |
| PPIL2 3.27678896897911 2      |   | 0.194291730400602    |                   |
| 0.402378878873464             |   |                      |                   |
| YPEL1 0.168718270300241       | 2 | 0.919101115299072    |                   |
| 0.247846145388239             |   |                      |                   |
| MAPK1 10.789908884689 2       |   | 0.00453942719975053  |                   |
| 0.626235893480699             |   |                      |                   |
| PPM1F 3.26145298769238 2      |   | 0.19578728418966     | 1.03395808620376  |
| AC245452.1 0.670106001851156  | 2 | 0.715300173776592    |                   |
| 0.348211197288547             |   |                      |                   |
| TOP3B 11.0983783646895 2      |   | 0.00389061054064488  |                   |
| 0.90333425325367              |   |                      |                   |
| IGLV6-57 6.29833248482227 2   |   | 0.0428878700515197   |                   |
| 1.04139775252422              |   |                      |                   |
| VPREB1 11.7210773427643 2     |   | 0.00284970821289809  |                   |
| 3.48654529954364              |   |                      |                   |
| AC245060.6 3.20054320050067 2 |   | 0.201841690295772    |                   |
| 0.315972045080972             |   |                      |                   |
| AC245060.5 2.08619580739306 2 |   | 0.35236140769652     |                   |
| 0.402718877953698             |   |                      |                   |
| IGLV1-51 1.15059510159571 2   |   | 0.562537460431769    |                   |
| 0.819287030254146             |   |                      |                   |
| IGLV1-44 10.4404670457869 2   |   | 0.00540606653872477  |                   |
| 1.88381143233623              |   |                      |                   |
| IGLV1-40 2.66354723530488 2   |   | 0.264008595500339    |                   |
| 1.47547152252584              |   |                      |                   |
| ZNF280B 0.0402531182539674    | 2 | 0.980074628068085    |                   |
| 0.034085303014639             |   |                      |                   |
| IGLV3-25 7.81158491710854 2   |   | 0.0201249999421053   |                   |
| 4.72832476770113              |   |                      |                   |
| IGLV3-21 0.106821208285707    | 2 | 0.947990683655658    |                   |
| 0.156560743666416             |   |                      |                   |
| IGLV2-14 0.871093262370815    | 2 | 0.64691094871135     |                   |
| 1.02308400957293              |   |                      |                   |
| IGLV3-10 4.25888134772032 2   |   | 0.118903781249585    |                   |
| 1.78151514353328              |   |                      |                   |
| IGLV3-1 0.408609491606037     | 2 | 0.815213900314305    |                   |
| 0.360985524922134             |   |                      |                   |
| IGLL5 2.46162732315291 2      |   | 0.292054847170524    |                   |
| 0.5803126322037               |   |                      |                   |
| IGLC2 35.1270431414417 2      |   | 2.35645688517749e-08 |                   |
| 0.589124201289284             |   |                      |                   |
| IGLC3 17.3058408082224 2      |   | 0.00017461615307135  |                   |
| 0.693301635326254             |   |                      |                   |
| IGLC5 3.89642182557551 2      |   | 0.14252884014225     | 0.289961553635716 |
| IGLC6 4.72946215987375 2      |   | 0.0939745686176821   |                   |
| 22.3474219658354              |   |                      |                   |
| IGLC7 3.88967513360922 2      |   | 0.143010451096108    |                   |



|                                |   |                                    |
|--------------------------------|---|------------------------------------|
| 1.19614372385266               |   |                                    |
| RSPH14 4.08296614422148 2      |   | 0.129836011852323                  |
| 2.8099237296246                |   |                                    |
| GNAZ 6.15624022715452 2        |   | 0.0460457360919153                 |
| 0.975040935647108              |   |                                    |
| BCR 0.761850650547087          | 2 | 0.683228907646783                  |
| 0.491057102369166              |   |                                    |
| IGLL1 41.3669507881449 2       |   | 1.04059272310053e-09               |
| 1.6486757149946                |   |                                    |
| VPREB3 156.384511690118 2      | 0 | 1.28964885140162                   |
| CHCHD10 2.32944147098567 2     |   | 0.312009783125481                  |
| 0.160592993364498              |   |                                    |
| MMP11 3.26489541739098 2       |   | 0.195450582060286                  |
| 4.93771823294289               |   |                                    |
| SMARCB1 11.044311241095 2      |   | 0.00399722215425913                |
| 0.251750226148114              |   |                                    |
| DERL3 4.36058300445326 2       |   | 0.11300858358487 0.899482045892287 |
| SLC2A11 4.58171506741338 2     |   | 0.101179659672704                  |
| 0.675109799740605              |   |                                    |
| MIF 1.83659507446918 2         |   | 0.399198082770851                  |
| 0.101793991260036              |   |                                    |
| DDT 5.39711334698401 2         |   | 0.067302582272434                  |
| 0.228514684082162              |   |                                    |
| CABIN1 0.58706729736198 2      |   | 0.74562413317339 0.267408750717326 |
| SPECC1L 0.876448037240917      | 2 | 0.645181234057088                  |
| 0.603060800384816              |   |                                    |
| ADORA2A-AS1 0.0418488528929123 | 2 | 0.979292970422717                  |
| 0.14986199037891               |   |                                    |
| GUCD1 1.57288295779153 2       |   | 0.455462688510723                  |
| 0.325053940976859              |   |                                    |
| SNRPD3 3.05863978524855 2      |   | 0.216682984910669                  |
| 0.172496242871144              |   |                                    |
| GGT1 0.145015849921398         | 2 | 0.930058375954995                  |
| 0.0995866120224409             |   |                                    |
| GRK3 1.69338509158069 2        |   | 0.428830927644304                  |
| 0.383338175838215              |   |                                    |
| ASPHD2 0.0151805046837896      | 2 | 0.992438480879984                  |
| 0.0516925786700986             |   |                                    |
| HPS4 2.35110017348333 2        |   | 0.308649149176758                  |
| 0.237134424860639              |   |                                    |
| SRRD 0.0181868365492167        | 2 | 0.990947801814889                  |
| 0.0394564181068115             |   |                                    |
| TFIP11 2.00430276091297 2      |   | 0.367088843274731                  |
| 0.265346892135984              |   |                                    |
| Z95115.1 4.23076800466729 2    |   | 0.120586974981476                  |
| 1.69715162317897               |   |                                    |
| TPST2 3.77884890316808 2       |   | 0.151158783003164                  |
| 0.331477569750776              |   |                                    |
| MIAT 0.2305571243316 2         |   | 0.891117877603669                  |
| 0.181661400531563              |   |                                    |

|            |                      |   |                      |
|------------|----------------------|---|----------------------|
| MIATNB     | 5.2734374655762      | 2 | 0.0715958095341152   |
|            | 1.13681814911828     |   |                      |
| PITPNB     | 0.0713336082166695   | 2 | 0.964961761218737    |
|            | 0.0478910872670929   |   |                      |
| TTC28      | 0.000118361588201433 | 2 | 0.999940820957048    |
|            | 0.00777543806695081  |   |                      |
| CHEK2      | 19.148833388904      | 2 | 6.94838160950617e-05 |
|            | 1.00683332440348     |   |                      |
| HSCB       | 4.96193830148475     | 2 | 0.0836621050982872   |
|            | 0.359888820251958    |   |                      |
| CCDC117    | 0.236676262542187    | 2 | 0.88839560748654     |
|            | 0.137763655604383    |   |                      |
| XBP1       | 354.522646264857     | 2 | 1.35635088578408     |
| Z93930.2   | 7.39308485808286     | 2 | 0.0248091577702959   |
|            | 0.755075156602518    |   |                      |
| RHBDD3     | 6.25869436304181     | 2 | 0.0437463463563401   |
|            | 1.52193153246348     |   |                      |
| EWSR1      | 10.8523229921409     | 2 | 0.0043999526649996   |
|            | 0.277431876376625    |   |                      |
| AP1B1      | 0.787604396911754    | 2 | 0.674487457707127    |
|            | 0.0856074303230556   |   |                      |
| THOC5      | 0.0499375607643834   | 2 | 0.975340361306336    |
|            | 0.0774299342926138   |   |                      |
| NIPSNAP1   | 0.668226887073904    | 2 | 0.715972555160935    |
|            | 0.240152962226399    |   |                      |
| NF2        | 5.90258175864426     | 2 | 0.0522721852941815   |
|            | 0.659979865634112    |   |                      |
| ZMAT5      | 4.83015460025186     | 2 | 0.0893604310821925   |
|            | 0.511101605064214    |   |                      |
| UQCR10     | 10.9658174226963     | 2 | 0.00415721994172824  |
|            | 0.172628124928721    |   |                      |
| ASCC2      | 0.0708508411319865   | 2 | 0.965194715221384    |
|            | 0.0576255276413427   |   |                      |
| MTMR3      | 2.8784315897643      | 2 | 0.237113631514728    |
|            | 1.1385307988875      |   |                      |
| AC003681.1 | 0.371756595084859    | 2 | 0.830374647467941    |
|            | 0.460165824705511    |   |                      |
| CASTOR1    | 3.69210233818314     | 2 | 0.157859296831609    |
|            | 20.7468785228751     |   |                      |
| TBC1D10A   | 0.0318632918027655   | 2 | 0.984194591490285    |
|            | 0.0590244804230741   |   |                      |
| SF3A1      | 0.978339685524834    | 2 | 0.613135181577031    |
|            | 0.17806224608826     |   |                      |
| MTFP1      | 1.91377409887957     | 2 | 0.384086669729888    |
|            | 0.423714779109077    |   |                      |
| PES1       | 1.82979092696697     | 2 | 0.400558496892192    |
|            | 0.272702254874706    |   |                      |
| DUSP18     | 1.37170074840657     | 2 | 0.503661746458781    |
|            | 1.06760645159314     |   |                      |
| MORC2-AS1  | 0.290818391863862    | 2 | 0.864668401917727    |

|                              |   |                      |
|------------------------------|---|----------------------|
| 0.200473912559018            |   |                      |
| MORC2 11.6680480096331 2     |   | 0.00292627790000299  |
| 1.22208030934461             |   |                      |
| SMTN 0.678647237885562       | 2 | 0.712251913577109    |
| 0.526099419818374            |   |                      |
| SELENOM 9.80630375892924 2   |   | 0.00742314928829058  |
| 2.59639927319887             |   |                      |
| RNF185 0.00570545001953718   | 2 | 0.997151340143715    |
| 0.0319365206453986           |   |                      |
| LIMK2 0.600855854761471      | 2 | 0.740501272101265    |
| 0.393161547909606            |   |                      |
| PIK3IP1 2.06833565636642 2   |   | 0.355522113340763    |
| 0.777267435246228            |   |                      |
| PATZ1 2.2731790045881 2      |   | 0.320911625959438    |
| 0.32518610371967             |   |                      |
| DRG1 2.7449044441035 2       |   | 0.253484596261451    |
| 0.184381192213669            |   |                      |
| EIF4ENIF1 2.10207875598675 2 |   | 0.349574220470239    |
| 0.444835340570546            |   |                      |
| SFI1 0.362909409734941       | 2 | 0.834056023126002    |
| 0.153080582360198            |   |                      |
| PISD 1.56345836068299 2      |   | 0.457614029579008    |
| 0.317486725503186            |   |                      |
| PRR14L 0.360629105735685     | 2 | 0.835007516088799    |
| 0.207879250456179            |   |                      |
| DEPDC5 0.101216212958748     | 2 | 0.950651151567883    |
| 0.106979374625669            |   |                      |
| YWHAH 2.40471368028064 2     |   | 0.300485181167798    |
| 0.141884002545666            |   |                      |
| RTCB 0.807068970321804       | 2 | 0.66795499186644     |
| 0.130818999453111            |   |                      |
| FBX07 0.803158851579875      | 2 | 0.669262160912857    |
| 0.109660609031803            |   |                      |
| LARGE1 2.51314313713975 2    |   | 0.284628183841128    |
| 5.89935353118792             |   |                      |
| HMGXB4 1.09595701139811 2    |   | 0.578117290764004    |
| 0.263476778241421            |   |                      |
| TOM1 0.0356684263775147      | 2 | 0.982323875202207    |
| 0.0735919240410872           |   |                      |
| HMOX1 6.25674597985277e-05   | 2 | 0.999968716759432    |
| 0.0065894896803629           |   |                      |
| MCM5 14.1550759756976 2      |   | 0.000843848157399019 |
| 0.570936151594043            |   |                      |
| APOL6 9.22865247770196 2     |   | 0.00990885736151059  |
| 2.59936835113062             |   |                      |
| RBF0X2 10.4144911738009 2    |   | 0.00547673813051675  |
| 1.02770427029442             |   |                      |
| APOL3 0.454185178407272      | 2 | 0.796846999445347    |
| 0.306682057576497            |   |                      |
| APOL2 0.10589662425674 2     |   | 0.948429033493525    |

|                            |   |                      |
|----------------------------|---|----------------------|
| 0.120327812134466          |   |                      |
| APOL1 0.897769890637568    | 2 | 0.638339538420996    |
| 0.816564082814594          |   |                      |
| MYH9 0.179728329107239     | 2 | 0.914055337953717    |
| 0.027936094805017          |   |                      |
| TXN2 0.0206285417833449    | 2 | 0.989738738791721    |
| 0.0157498411105614         |   |                      |
| FOXRED2 1.3497719635819 2  |   | 0.509214477020433    |
| 0.92719934225453           |   |                      |
| EIF3D 1.20491077303298 2   |   | 0.547465744420991    |
| 0.0830049428796224         |   |                      |
| IFT27 0.0286463064314164   | 2 | 0.985778935152983    |
| 0.0311209315693222         |   |                      |
| NCF4 1.79217311211155 2    |   | 0.408163864694668    |
| 0.131865924482451          |   |                      |
| CSF2RB 10.495616561521 2   |   | 0.00525903209900636  |
| 1.09946171733593           |   |                      |
| TST 1.09404887971169 2     |   | 0.578669115921399    |
| 0.462344893654844          |   |                      |
| MPST 8.06306346103534 2    |   | 0.0177471253104484   |
| 0.379724526880457          |   |                      |
| KCTD17 0.0280190155093775  | 2 | 0.986088168733882    |
| 0.0537987426751625         |   |                      |
| RAC2 13.5551319219754 2    |   | 0.00113904400443998  |
| 0.261983823479976          |   |                      |
| CYTH4 16.2459804468695 2   |   | 0.000296640312110519 |
| 1.08855479286831           |   |                      |
| MFNG 7.6370193727298 2     |   | 0.0219605045582272   |
| 0.433302752709249          |   |                      |
| GGA1 2.89847654979173 2    |   | 0.234749034239994    |
| 0.2837950234625            |   |                      |
| SH3BP1 2.34748848883675 2  |   | 0.309207024439162    |
| 0.328662266895592          |   |                      |
| Z83844.2 1.3216134478134 2 |   | 0.516434546303058    |
| 1.04785986226847           |   |                      |
| LGALS1 105.590640879555 2  | 0 | 2.35524003955721     |
| NOL12 0.00256958688041686  | 2 | 0.99871603155353     |
| 0.0103824284953376         |   |                      |
| TRIOBP 0.747824078799478   | 2 | 0.68803742935265     |
| 0.303906141600739          |   |                      |
| H1F0 9.33045630935751 2    |   | 0.00941709942309632  |
| 1.73741314758425           |   |                      |
| GCAT 4.70899331239798 2    |   | 0.0949412826157821   |
| 2.6679493028916            |   |                      |
| ANKRD54 3.8615177285739 2  |   | 0.145038092482519    |
| 0.417366364943873          |   |                      |
| EIF3L 24.8148391464316 2   |   | 4.08814362151677e-06 |
| 0.261264242942509          |   |                      |
| MICALL1 5.9545275103269 2  |   | 0.0509320058117234   |
| 1.2980010171608            |   |                      |

|               |                    |   |                      |
|---------------|--------------------|---|----------------------|
| POLR2F        | 14.222111502383    | 2 | 0.00081603300934352  |
|               | 0.245184583044488  |   |                      |
| PICK1         | 2.94682289579008   | 2 | 0.229142442787858    |
|               | 0.552579770795022  |   |                      |
| PLA2G6        | 0.356769246831719  | 2 | 0.836620577733643    |
|               | 0.302212336158888  |   |                      |
| AL022322.2    | 2.34275872867348   | 2 | 0.309939127298897    |
|               | 1.71594646524803   |   |                      |
| MAFF          | 1.38752751435484   | 2 | 0.499691806713412    |
|               | 0.623585918603165  |   |                      |
| TMEM184B      | 2.73926905817935   | 2 | 0.2541998452271      |
| CSNK1E        | 1.71559510936285   | 2 | 0.812108868881952    |
|               | 0.475671207503668  |   | 0.424095100748832    |
| TPTEP2-CSNK1E | 1.2372592528301    | 2 | 0.538682127782255    |
|               | 0.849188804264156  |   |                      |
| DDX17         | 3.05727830486176   | 2 | 0.216830539945346    |
|               | 0.178626023442311  |   |                      |
| DMC1          | 0.431087379973529  | 2 | 0.806103050857133    |
|               | 0.663778951391829  |   |                      |
| CBY1          | 1.55622193004044   | 2 | 0.459272774710967    |
|               | 0.30137698257702   |   |                      |
| TOMM22        | 5.53519121028565   | 2 | 0.0628128502174669   |
|               | 0.222823704191168  |   |                      |
| JOSD1         | 5.0986030703963    | 2 | 0.0781362223471503   |
|               | 0.758789387311285  |   |                      |
| GTPBP1        | 2.31935620100909   | 2 | 0.313587108169413    |
|               | 0.664019216205206  |   |                      |
| SUN2          | 0.14433934672761   | 2 | 0.930373022897782    |
|               | 0.0898485170750329 |   |                      |
| DNAL4         | 1.89546698751732   | 2 | 0.387618568502942    |
|               | 0.784232247743826  |   |                      |
| CBX6          | 1.33253353124954   | 2 | 0.513622476131942    |
|               | 0.344857583862284  |   |                      |
| APOBEC3B      | 0.6352677874983    | 2 | 0.7278692171112      |
| APOBEC3C      | 1.07877779623062   | 2 | 0.841489702462725    |
|               | 0.165916119231804  |   | 0.583104479763843    |
| APOBEC3D      | 1.98592457088503   | 2 | 0.370477603508643    |
|               | 2.03003486708795   |   |                      |
| APOBEC3F      | 1.63021117566474   | 2 | 0.442592592501613    |
|               | 0.424632805860432  |   |                      |
| APOBEC3G      | 0.186400978470173  | 2 | 0.911010834120163    |
|               | 0.0609385988641418 |   |                      |
| CBX7          | 0.364944351404926  | 2 | 0.833207827028292    |
|               | 0.263063813997074  |   |                      |
| AL031846.2    | 4.83662408139882   | 2 | 0.0890718402799361   |
|               | 1.61976004193846   |   |                      |
| RPL3          | 30.8601043842749   | 2 | 1.98981855992209e-07 |
|               | 0.209174379329651  |   |                      |
| SYNGR1        | 6.88557419244698   | 2 | 0.0319754423865776   |
|               | 0.625010797736896  |   |                      |

|            |                     |   |                      |
|------------|---------------------|---|----------------------|
| TAB1       | 0.498126291524292   | 2 | 0.779530747767338    |
|            | 0.230145862996356   |   |                      |
| MGAT3      | 1.90663987913296    | 2 | 0.385459195601616    |
|            | 0.474378500735595   |   |                      |
| MIEF1      | 0.0535476440124634  | 2 | 0.973581419315904    |
|            | 0.0768264642164816  |   |                      |
| ATF4       | 6.25036993820639    | 2 | 0.0439288073997713   |
|            | 0.273297578463825   |   |                      |
| RPS19BP1   | 0.00342229305273546 | 2 | 0.998290316650161    |
|            | 0.00536130133242646 |   |                      |
| TNRC6B     | 1.08037044338182    | 2 | 0.582640324752887    |
|            | 0.152286884903465   |   |                      |
| ADSL       | 4.04631382375665    | 2 | 0.132237343799956    |
|            | 0.203644734014657   |   |                      |
| SGSM3      | 4.16255341984438    | 2 | 0.124770814331158    |
|            | 0.297884574793387   |   |                      |
| AL022238.2 | 5.25929733181739    | 2 | 0.0721037903088459   |
|            | 1.06395047222346    |   |                      |
| MKL1       | 1.77404528408217    | 2 | 0.411880243895844    |
|            | 0.547539163708311   |   |                      |
| SLC25A17   | 0.0600813430947308  | 2 | 0.970406064829657    |
|            | 0.0614620444786737  |   |                      |
| ST13       | 1.40834999020444    | 2 | 0.494516384449512    |
|            | 0.0504223853603024  |   |                      |
| XPNPEP3    | 1.58898860145807    | 2 | 0.451809656975438    |
|            | 0.329289848829277   |   |                      |
| RBX1       | 5.89103205982636    | 2 | 0.0525749225823281   |
|            | 0.140237096316067   |   |                      |
| EP300      | 0.477760218552355   | 2 | 0.787509291772177    |
|            | 0.0729707032794531  |   |                      |
| L3MBTL2    | 14.9777292003443    | 2 | 0.000559277603819464 |
|            | 1.58933534220615    |   |                      |
| RANGAP1    | 2.52294706477672    | 2 | 0.2832363609021      |
|            | 0.00910865686047356 | 2 | 0.419592388727258    |
| ZC3H7B     | 0.00910865686047356 | 2 | 0.995456026797155    |
|            | 0.0497072470474799  |   |                      |
| TOB2       | 1.27258860269071    | 2 | 0.529250035788843    |
|            | 0.16956045377407    |   |                      |
| PHF5A      | 0.744655957131317   | 2 | 0.689128186181373    |
|            | 0.051695581733493   |   |                      |
| AC02       | 10.7283382156961    | 2 | 0.00468134832062739  |
|            | 0.346152559933616   |   |                      |
| POLR3H     | 7.16605215417218    | 2 | 0.0277914717457262   |
|            | 0.807179356098568   |   |                      |
| PMM1       | 2.87071417473591    | 2 | 0.238030351205485    |
|            | 0.495942025924519   |   |                      |
| DESI1      | 0.592472179424741   | 2 | 0.743611848187345    |
|            | 0.155141561410016   |   |                      |
| XRCC6      | 0.186001114541806   | 2 | 0.911192992514657    |
|            | 0.0302708212240177  |   |                      |
| SNU13      | 2.05476184375652    | 2 | 0.357943215215722    |

|                              |   |                                   |  |
|------------------------------|---|-----------------------------------|--|
| 0.0517763963301262           |   |                                   |  |
| C22orf46 0.519564392554088   | 2 | 0.771219541999624                 |  |
| 0.374727827589746            |   |                                   |  |
| MEI1 0.215709665696983       | 2 | 0.89775791193026                  |  |
| 0.229336384558633            |   |                                   |  |
| CCDC134 1.00324899076346 2   |   | 0.605546153336591                 |  |
| 0.749437054873946            |   |                                   |  |
| AL021453.1 0.015263416089692 | 2 | 0.992397339497902                 |  |
| 0.0584767443187801           |   |                                   |  |
| SREBF2 2.10591224271927 2    |   | 0.348904818143316                 |  |
| 0.255195092629531            |   |                                   |  |
| SHISA8 5.80086663908277 2    |   | 0.0549993825849209                |  |
| 0.906959751466987            |   |                                   |  |
| TNFRSF13C 14.9625780466846 2 |   | 0.000563530543171376              |  |
| 0.383394829947158            |   |                                   |  |
| CENPM 13.9967381551068 2     |   | 0.000913370387741419              |  |
| 0.715126717371172            |   |                                   |  |
| WBP2NL 0.395378965251266     | 2 | 0.820624631785188                 |  |
| 0.475327589365273            |   |                                   |  |
| NAGA 0.448405230513145       | 2 | 0.799153197334343                 |  |
| 0.310623853613664            |   |                                   |  |
| SMDT1 5.6445845895898 2      |   | 0.0594694648002838                |  |
| 0.157100703716035            |   |                                   |  |
| NDUFA6 0.0556517332484773    | 2 | 0.972557706813555                 |  |
| 0.0271598057453537           |   |                                   |  |
| TCF20 3.61589528390572 2     |   | 0.163990358593049                 |  |
| 1.70052171074151             |   |                                   |  |
| RRP7A 1.94369900830103 2     |   | 0.378382570409662                 |  |
| 0.139597743344726            |   |                                   |  |
| SERHL2 2.44802478424899 2    |   | 0.29404796105016 2.06214555411685 |  |
| POLDIP3 2.70433748509663 2   |   | 0.258678644482954                 |  |
| 0.335993463883698            |   |                                   |  |
| Z93241.1 0.543018880943802   | 2 | 0.762228087641229                 |  |
| 0.63189052767234             |   |                                   |  |
| CYB5R3 17.6727822942909 2    |   | 0.000145346334873619              |  |
| 0.539325332391452            |   |                                   |  |
| ATP5MGL 2.76514167929342 2   |   | 0.250932615597869                 |  |
| 0.89814518978753             |   |                                   |  |
| A4GALT 24.8704397651828 2    |   | 3.97605720148242e-06              |  |
| 0.450100407101967            |   |                                   |  |
| ARFGAP3 4.06878532336048 2   |   | 0.130759873874965                 |  |
| 0.398791001122635            |   |                                   |  |
| PACSIN2 2.58870913329882 2   |   | 0.274074704210779                 |  |
| 0.297876121603975            |   |                                   |  |
| TTLL1 0.00481854194416347    | 2 | 0.997593628991826                 |  |
| 0.0714495918795322           |   |                                   |  |
| BIK 190.125249274061 2       | 0 | 1.16686903164761                  |  |
| MCAT 0.0527920336602417      | 2 | 0.973949312907162                 |  |
| 0.0655630172318432           |   |                                   |  |
| TSP0 73.4705168323681 2      |   | 1.11022302462516e-16              |  |

|                                |   |  |                      |
|--------------------------------|---|--|----------------------|
| 0.705060854823112              |   |  |                      |
| TLL12 0.000554941018656831     | 2 |  | 0.999722567982053    |
| 0.0177638212967029             |   |  |                      |
| SAMM50 4.18125353578892 2      |   |  | 0.123609636981195    |
| 0.228828170604568              |   |  |                      |
| PARVG 3.33294023881719 2       |   |  | 0.188912729467865    |
| 0.308864821816193              |   |  |                      |
| PRR5 14.7198073519515 2        |   |  | 0.000636259743685863 |
| 2.87288036459606               |   |  |                      |
| NUP50-DT 2.97769074451967 2    |   |  | 0.225633027346728    |
| 0.763887488725891              |   |  |                      |
| NUP50 0.0362522528164371       | 2 |  | 0.982037163726714    |
| 0.0521775040137593             |   |  |                      |
| KIAA0930 1.5538107816883 2     |   |  | 0.459826795997706    |
| 0.60514488722444               |   |  |                      |
| FAM118A 0.647925006438692      | 2 |  | 0.723277362443993    |
| 0.265021413358374              |   |  |                      |
| ATXN10 13.6892990077919 2      |   |  | 0.00106513949849518  |
| 0.362030004768653              |   |  |                      |
| PRR34-AS1 0.204675564081163    | 2 |  | 0.902724576014758    |
| 0.150592330729222              |   |  |                      |
| MIRLET7BHG 0.00910415009820361 | 2 |  | 0.995458269941514    |
| 0.0792868775495913             |   |  |                      |
| PPARA 1.10754297878244 2       |   |  | 0.574777948442902    |
| 0.571828048062265              |   |  |                      |
| CDPF1 0.400173591484728        | 2 |  | 0.818659693818337    |
| 0.346993398794707              |   |  |                      |
| TTC38 7.34622795080531 2       |   |  | 0.0253972602384691   |
| 1.04669252819069               |   |  |                      |
| TRMU 0.00312813177931763       | 2 |  | 0.998437156623948    |
| 0.0162776972128797             |   |  |                      |
| GRAMD4 0.00444674097362536     | 2 |  | 0.99777909937054     |
| 0.0384701028761427             |   |  |                      |
| CERK 1.26657088360383 2        |   |  | 0.530844872927161    |
| 0.427735460104432              |   |  |                      |
| AL118516.1 3.18213336594789 2  |   |  | 0.203708203729548    |
| 0.600405687026126              |   |  |                      |
| TBC1D22A 0.00465415297858767   | 2 |  | 0.997675629054124    |
| 0.0103326343611513             |   |  |                      |
| C22orf34 1.46156342569023 2    |   |  | 0.481532422845374    |
| 1.77684941416728               |   |  |                      |
| Z97192.1 3.94993893366902 2    |   |  | 0.138765549129748    |
| 0.550326474966008              |   |  |                      |
| BRD1 0.299168565224727         | 2 |  | 0.861065862081026    |
| 0.328642838483543              |   |  |                      |
| ZBED4 4.49810008521555 2       |   |  | 0.105499396906568    |
| 2.11262310509965               |   |  |                      |
| ALG12 3.32645909275098 2       |   |  | 0.189525907952823    |
| 0.666233018686555              |   |  |                      |
| CRELD2 4.03585124623265 2      |   |  | 0.132930928118679    |



|                    |                    |   |                    |
|--------------------|--------------------|---|--------------------|
| 0.223655344882231  |                    |   |                    |
| PIM3               | 9.05437195618835   | 2 | 0.0108110558560117 |
| 0.553795429444157  |                    |   |                    |
| TRABD              | 1.89475645507449   | 2 | 0.387756300751483  |
| 0.098558890475044  |                    |   |                    |
| AL022328.3         | 3.94949554668598   | 2 | 0.138796315959114  |
| 1.6298649483603    |                    |   |                    |
| AL022328.4         | 1.1922868365581    | 2 | 0.550932259568521  |
| 0.860226190018224  |                    |   |                    |
| SELEN00            | 1.47004011352149   | 2 | 0.479495841745074  |
| 0.472078928277355  |                    |   |                    |
| TUBGCP6            | 2.07579522510115   | 2 | 0.354198562334456  |
| 0.720163964005206  |                    |   |                    |
| HDAC10             | 1.06466997871689   | 2 | 0.587232186678399  |
| 0.327390364939464  |                    |   |                    |
| PLXNB2             | 1.79194285723675   | 2 | 0.408210858259524  |
| 0.54501496004612   |                    |   |                    |
| DENND6B            | 5.41480536898618   | 2 | 0.0667098484195502 |
| 0.311634374672654  |                    |   |                    |
| PPP6R2             | 0.0653902828186044 | 2 | 0.96783356699624   |
| 0.0593208210775742 |                    |   |                    |
| SBF1               | 0.746323650334925  | 2 | 0.688553798494009  |
| 0.351071882814142  |                    |   |                    |
| LMF2               | 2.05952825849361   | 2 | 0.357091178001658  |
| 0.426055319326437  |                    |   |                    |
| NCAPH2             | 0.275295734659142  | 2 | 0.871405488067664  |
| 0.106056740579467  |                    |   |                    |
| TYMP               | 1.27838937542809   | 2 | 0.527717230138247  |
| 0.253079610336996  |                    |   |                    |
| ODF3B              | 0.3430461233037    | 2 | 0.842380841102334  |
| 0.38086819426216   |                    |   |                    |
| U62317.5           | 4.74431440197843   | 2 | 0.0932792869135739 |
| 1.8540634927489    |                    |   |                    |
| KLHDC7B            | 3.70630155792254   | 2 | 0.156742526417773  |
| 1.57661060574431   |                    |   |                    |
| CHKB               | 2.52191675205535   | 2 | 0.283382309504943  |
| 0.398597511110196  |                    |   |                    |
| CHKB-DT            | 1.0477491904965    | 2 | 0.592221478338405  |
| 0.687512693121567  |                    |   |                    |
| ARSA               | 5.27150128462342   | 2 | 0.07166515431607   |
| RABL2B             | 2.79468181491709   | 2 | 1.19093885593891   |
| 0.437074392429675  |                    |   | 0.247253560678024  |
| GATD3B             | 0.450766042893574  | 2 | 0.798210428487839  |
| 0.739884684036301  |                    |   |                    |
| FP565260.1         | 0.794836429622471  | 2 | 0.672052904373674  |
| 0.314017419080953  |                    |   |                    |
| FP565260.6         | 2.5849527479422    | 2 | 0.274589953030352  |
| 1.56127093229477   |                    |   |                    |
| U2AF1L5            | 0.0485525688482054 | 2 | 0.976016014480847  |
| 0.132736050094007  |                    |   |                    |

|            |                      |   |                      |
|------------|----------------------|---|----------------------|
| HSPA13     | 4.59540554176703     | 2 | 0.100489426006553    |
|            | 1.15672339911636     |   |                      |
| SAMSN1     | 19.6713953103687     | 2 | 5.35070222758005e-05 |
|            | 0.791681397021927    |   |                      |
| NRIP1      | 0.218550149709818    | 2 | 0.89648378343172     |
|            | 0.271389121634456    |   |                      |
| USP25      | 0.20139296682453     | 2 | 0.904207433195963    |
|            | 0.163784238849722    |   |                      |
| BTG3       | 0.000107576485235117 | 2 | 0.999946213203944    |
|            | 0.00276167708488036  |   |                      |
| C21orf91   | 0.648103798806882    | 2 | 0.723212707097762    |
|            | 0.282155980850636    |   |                      |
| MIR155HG   | 13.193008302819      | 2 | 0.00136513200042931  |
|            | 1.09289656869637     |   |                      |
| MRPL39     | 4.73743351106933     | 2 | 0.0936007619037243   |
|            | 0.41689716593397     |   |                      |
| ATP5PF     | 7.3929378108511      | 2 | 0.0248109818963395   |
|            | 0.138077818845949    |   |                      |
| GABPA      | 5.27126608002018     | 2 | 0.0716735827987582   |
|            | 0.458862852103007    |   |                      |
| N6AMT1     | 1.52458490790806     | 2 | 0.466595551195877    |
|            | 0.661759440672529    |   |                      |
| LTN1       | 0.000616568395732049 | 2 | 0.999691763316825    |
|            | 0.00698601435923005  |   |                      |
| RWDD2B     | 3.48753172312509     | 2 | 0.174860658116024    |
|            | 0.644235566471464    |   |                      |
| USP16      | 0.219558036822319    | 2 | 0.896032120021768    |
|            | 0.0571977164494182   |   |                      |
| CCT8       | 0.295983906127498    | 2 | 0.862438054898171    |
|            | 0.0351630436959408   |   |                      |
| MAP3K7CL   | 8.36642270007252     | 2 | 0.0152494575045095   |
|            | 0.613196695577517    |   |                      |
| BACH1      | 0.22090078400398     | 2 | 0.895430749614542    |
|            | 0.212298076984502    |   |                      |
| AP000251.1 | 10.9433517599478     | 2 | 0.00420418054883365  |
|            | 2.52022236534383     |   |                      |
| SOD1       | 11.54407262167       | 2 | 0.00311341118188191  |
|            | 0.180457289867837    |   |                      |
| SCAF4      | 13.3268551618491     | 2 | 0.00127676265458554  |
|            | 0.61958677103044     |   |                      |
| MIS18A     | 0.17804467699388     | 2 | 0.914825137527662    |
|            | 0.0695665485958579   |   |                      |
| URB1       | 1.87250703930518     | 2 | 0.392094059742255    |
|            | 1.18902914859792     |   |                      |
| URB1-AS1   | 0.169902750373003    | 2 | 0.918556947975853    |
|            | 0.411517659817689    |   |                      |
| CFAP298    | 5.73290374997958     | 2 | 0.056900458778587    |
|            | 0.174859036380736    |   |                      |
| PAXBP1     | 0.0677170946153057   | 2 | 0.966708238449639    |
|            | 0.0853170861652962   |   |                      |

|            |                      |   |                     |
|------------|----------------------|---|---------------------|
| IFNAR2     | 0.115994609394224    | 2 | 0.943652490862655   |
|            | 0.114504826510662    |   |                     |
| IL10RB     | 0.0206022082576391   | 2 | 0.989751770532774   |
|            | 0.114843176682527    |   |                     |
| IFNAR1     | 0.480179472725079    | 2 | 0.78655727511074    |
|            | 0.0720561501445588   |   |                     |
| IFNGR2     | 7.63042393822383     | 2 | 0.0220330436339358  |
|            | 0.466549219668466    |   |                     |
| TMEM50B    | 1.50009264608112     | 2 | 0.472344671792832   |
|            | 0.235940192967237    |   |                     |
| DNAJC28    | 0.0275009798324348   | 2 | 0.986343616241192   |
|            | 0.146945696586645    |   |                     |
| GART       | 0.0721282776150561   | 2 | 0.964578424589125   |
|            | 0.0574310017463978   |   |                     |
| SON        | 0.00320857685032853  | 2 | 0.998396997757617   |
|            | 0.00359277841250994  |   |                     |
| DONSON     | 1.89366568531037     | 2 | 0.387967834854344   |
|            | 1.00549638656569     |   |                     |
| CRYZL1     | 0.302717902220787    | 2 | 0.8595391107603     |
|            | 0.126524768645229    |   |                     |
| ATP5P0     | 5.51840352055551     | 2 | 0.0633423105329379  |
|            | 0.14484142645986     |   |                     |
| LINC00649  | 2.20905167646584     | 2 | 0.331367967018035   |
|            | 1.13762041242005     |   |                     |
| AP000569.1 | 0.455380899959419    | 2 | 0.796370738262973   |
|            | 0.536354928542251    |   |                     |
| MRPS6      | 2.92925072447342     | 2 | 0.231164578237526   |
|            | 0.174254358692931    |   |                     |
| SLC5A3     | 6.17059324873592     | 2 | 0.0457164712694186  |
|            | 0.728218953955584    |   |                     |
| RUNX1      | 6.54068505159596     | 2 | 0.0379934111226889  |
|            | 0.46476407795242     |   |                     |
| SETD4      | 0.416454957927666    | 2 | 0.812022297709725   |
|            | 0.238699508035833    |   |                     |
| CBR1       | 2.39453857959563     | 2 | 0.302017810011593   |
|            | 0.361092680348106    |   |                     |
| MORC3      | 0.312676241012545    | 2 | 0.855269957165019   |
|            | 0.236979918522277    |   |                     |
| CHAF1B     | 0.566995145012383    | 2 | 0.753144950392549   |
|            | 0.634748148443367    |   |                     |
| HLCS       | 2.46450981135199     | 2 | 0.291634228025537   |
|            | 1.50409512921138     |   |                     |
| PIGP       | 0.000760354566048064 | 2 | 0.999619894975202   |
|            | 0.00669782227873481  |   |                     |
| TTC3       | 10.8657279349681     | 2 | 0.00437056071741682 |
|            | 0.521079767673164    |   |                     |
| VPS26C     | 1.27441524077192     | 2 | 0.528766882324132   |
|            | 0.301378180960936    |   |                     |
| DYRK1A     | 2.85233069126608     | 2 | 0.240228350966523   |
|            | 0.632050689045497    |   |                     |

|            |                    |   |                      |
|------------|--------------------|---|----------------------|
| ETS2       | 2.15263727954773   | 2 | 0.340848003101861    |
|            | 1.21975477189125   |   |                      |
| PSMG1      | 0.252222243884404  | 2 | 0.881516885472294    |
|            | 0.128405781151071  |   |                      |
| BRWD1      | 17.9529570500794   | 2 | 0.000126346992790904 |
|            | 0.620578097536067  |   |                      |
| BRWD1-AS2  | 1.86947945269749   | 2 | 0.392688058586674    |
|            | 1.57077807763654   |   |                      |
| HMG1       | 38.0287468924331   | 2 | 5.52284096233535e-09 |
|            | 0.255738103527395  |   |                      |
| WRB        | 1.30876743948702   | 2 | 0.519762283137279    |
|            | 0.148110398771544  |   |                      |
| SH3BGR     | 0.895664366115352  | 2 | 0.639011912059515    |
|            | 0.748130577053409  |   |                      |
| BACE2      | 5.98395464041883   | 2 | 0.0501881006007057   |
|            | 2.38036414352457   |   |                      |
| MX2        | 3.69927115882455   | 2 | 0.15729447721619     |
|            | 0.679615752859644  |   | 0.569176623293919    |
| MX1        | 28.3734460385964   | 2 | 6.89897349470669e-07 |
|            | 0.679615752859644  |   |                      |
| PRDM15     | 11.9213045474897   | 2 | 0.00257822971189048  |
|            | 0.456956217227271  |   |                      |
| C2CD2      | 0.0152266907254043 | 2 | 0.992415562742121    |
|            | 0.0971561857178593 |   |                      |
| ZBTB21     | 3.42274303199922   | 2 | 0.180617902320378    |
|            | 1.29132513461104   |   |                      |
| ZNF295-AS1 | 0.0169409144191243 | 2 | 0.991565316036601    |
|            | 0.134656739975125  |   |                      |
| SLC37A1    | 2.1841414882199    | 2 | 0.335520995730414    |
|            | 0.553150104283993  |   |                      |
| PDE9A      | 16.3277513667871   | 2 | 0.000284756626848459 |
|            | 1.69881675053409   |   |                      |
| WDR4       | 4.77546928504399   | 2 | 0.091837493159369    |
|            | 0.691106005247645  |   |                      |
| NDUFV3     | 2.31193605514164   | 2 | 0.314752700090321    |
|            | 0.303863927545783  |   |                      |
| PKN0X1     | 2.17933997431826   | 2 | 0.336327467777396    |
|            | 0.382893361349923  |   |                      |
| U2AF1      | 0.197594891196724  | 2 | 0.9059261887776      |
|            | 0.257349407180623  |   |                      |
| RRP1B      | 0.200299761997115  | 2 | 0.90470181026298     |
|            | 0.131490472504352  |   |                      |
| PDXK       | 94.2184101536687   | 2 | 0.889500510090762    |
|            | 0.18516727203303   |   | 0.084969696724787    |
| CSTB       | 4.93092119035292   | 2 | 0.468752674321048    |
|            | 0.18516727203303   |   |                      |
| RRP1       | 1.51535999299111   | 2 | 0.468752674321048    |
|            | 0.116288211385455  |   |                      |
| AGPAT3     | 4.68544388248513   | 2 | 0.0960657965796534   |
|            | 1.66219222871155   |   |                      |
| TRAPPC10   | 2.1823854047167    | 2 | 0.335815726547251    |
|            | 0.521124019071005  |   |                      |

|            |                     |   |                      |
|------------|---------------------|---|----------------------|
| PWP2       | 0.00409495116788944 | 2 | 0.997954619064364    |
|            | 0.0328179452623024  |   |                      |
| GATD3A     | 1.69591626556926    | 2 | 0.428288548086182    |
|            | 0.230039483425388   |   |                      |
| LINC01678  | 0.738950797277918   | 2 | 0.691096785871267    |
|            | 0.378080794945503   |   |                      |
| ICOSLG     | 0.133452120257575   | 2 | 0.935451423682945    |
|            | 0.130051741261772   |   |                      |
| AP001059.3 | 2.98121546468786    | 2 | 0.225235730898211    |
|            | 0.816608226024961   |   |                      |
| AP001059.2 | 1.20933970298644    | 2 | 0.54625474206005     |
|            | 0.246905856624683   |   |                      |
| PFKL       | 8.28994163596935    | 2 | 0.015843898301458    |
|            | 0.309975688509884   |   |                      |
| C21orf2    | 0.121321018325919   | 2 | 0.941142694868158    |
|            | 0.091452010273592   |   |                      |
| UBE2G2     | 3.24782129534656    | 2 | 0.197126298274582    |
|            | 0.376971163337126   |   |                      |
| SUM03      | 9.25116868967405    | 2 | 0.00979792799406431  |
|            | 0.393614431195643   |   |                      |
| PTTG1IP    | 3.58927717556658    | 2 | 0.166187503688632    |
|            | 0.441163580232027   |   |                      |
| ITGB2      | 91.2942865413602    | 2 | 1.85806886166952     |
| ITGB2-AS1  | 16.7703507156428    | 2 | 0.000228225733902465 |
|            | 2.63859879753588    |   |                      |
| FAM207A    | 1.2732357244394     | 2 | 0.529078818885556    |
|            | 0.164030363079418   |   |                      |
| ADARB1     | 0.552070785618725   | 2 | 0.7587860747151      |
|            | 0.327685620563657   |   |                      |
| POFUT2     | 0.293638732439486   | 2 | 0.863449931555802    |
|            | 0.399179531571068   |   |                      |
| SPATC1L    | 0.0850567469702994  | 2 | 0.958363273029081    |
|            | 0.0809423750412878  |   |                      |
| LSS        | 2.64358660947075    | 2 | 0.266656676252997    |
|            | 0.647780103956461   |   |                      |
| MCM3AP-AS1 | 0.0187071288301923  | 2 | 0.990690044097613    |
|            | 0.107610414257156   |   |                      |
| MCM3AP     | 0.903380308492654   | 2 | 0.636551371911961    |
|            | 0.160229451499387   |   |                      |
| YBEY       | 3.01978171008882    | 2 | 0.220934090484968    |
|            | 0.306109567069621   |   |                      |
| C21orf58   | 0.0507097829107588  | 2 | 0.974963844286082    |
|            | 0.0447961408974205  |   |                      |
| PCNT       | 0.166450096472698   | 2 | 0.920144047122251    |
|            | 0.158003385013615   |   |                      |
| DIP2A      | 0.55152049997315    | 2 | 0.758994877981631    |
|            | 0.290682823421434   |   |                      |
| PRMT2      | 2.90272226549021    | 2 | 0.234251223987206    |
|            | 0.214765892890751   |   |                      |
| MT-ND1     | 12.1493600260185    | 2 | 0.00230038216073269  |

|                              |                      |                    |
|------------------------------|----------------------|--------------------|
| 0.207835915155084            |                      |                    |
| MT-ND2 3.06106021666253 2    | 0.21642091037424     | 0.0889981133736134 |
| MT-C01 16.026922448483 2     | 0.000330977148001343 |                    |
| 0.104590363663965            |                      |                    |
| MT-C02 0.000245428750931775  | 2                    | 0.999877293153635  |
| 0.000605579623528965         |                      |                    |
| MT-ATP8 1.17505537067124 2   | 0.555699451724779    |                    |
| 0.552822303631778            |                      |                    |
| MT-ATP6 2.91860840216186 2   | 0.232397920708712    |                    |
| 0.052374515193507            |                      |                    |
| MT-C03 35.7318801532442 2    | 1.74148929721341e-08 |                    |
| 0.226532017952941            |                      |                    |
| MT-ND3 11.3924676869824 2    | 0.00335859064635291  |                    |
| 0.101554894061422            |                      |                    |
| MT-ND4L 1.11095172850995 2   | 0.573799145715661    |                    |
| 0.101789030723044            |                      |                    |
| MT-ND4 0.0019153059563055    | 2                    | 0.999042805425118  |
| 0.00198475064034668          |                      |                    |
| MT-ND5 33.0018777180889 2    | 6.81919810618936e-08 |                    |
| 0.436353069367591            |                      |                    |
| MT-ND6 0.0627329703869738    | 2                    | 0.969120339730903  |
| 0.0482591948878375           |                      |                    |
| MT-CYB 1.81799542518242 2    | 0.402927871246587    |                    |
| 0.0669443224195142           |                      |                    |
| AL592183.1 0.370315220493844 | 2                    | 0.830973303622914  |
| 0.271791940708161            |                      |                    |
| FM01 0.328715661477598       | 2                    | 0.848438370226656  |
| 0.5363751564353              |                      |                    |
| OR2T10 3.43660003568188e-05  | 2                    | 0.999982817147449  |
| 0.00580228614898276          |                      |                    |
| DNASE1L3 0.839768774910453   | 2                    | 0.65712278706123   |
| 0.376506020451841            |                      |                    |
| NMU 1.27234089811546 2       | 0.529315588675853    |                    |
| 1.73779444323259             |                      |                    |
| ENPP3 0.135458345806239      | 2                    | 0.934513530894845  |
| 0.301660858330058            |                      |                    |
| CALD1 0.692461154345457      | 2                    | 0.707349369683854  |
| 0.800134736264545            |                      |                    |
| ATG9B 1.9422159695912 2      | 0.378663252461909    |                    |
| 1.51596327801981             |                      |                    |
| KLF8 1.18594633471164 2      | 0.552681624570898    |                    |
| 0.746220785611074            |                      |                    |
| FGF13 0.0625359363673708     | 2                    | 0.969215819272013  |
| 0.292895769656193            |                      |                    |
| KBTBD11 0.740517840759924    | 2                    | 0.690555508593348  |
| 0.660839926786737            |                      |                    |
| MICU3 2.52452707282648 2     | 0.283012691398532    |                    |
| 1.62356396474762             |                      |                    |
| LINC01506 8.47679506774716 2 | 0.0144306980295003   |                    |
| 2.69517546207388             |                      |                    |

|            |                    |   |                    |
|------------|--------------------|---|--------------------|
| PALM2      | 1.90734509701511   | 2 | 0.385323303202671  |
|            | 1.45782906016169   |   |                    |
| AL139099.1 | 0.864591221540633  | 2 | 0.649017491764231  |
|            | 0.915824627506637  |   |                    |
| GPR135     | 3.10925174758309   | 2 | 0.211268408905941  |
|            | 2.38987302121989   |   |                    |
| AL022341.1 | 0.3775392172036    | 2 | 0.827977243556645  |
|            | 0.347474866523849  |   |                    |
| MPV17L     | 2.51225922922085   | 2 | 0.284754004195303  |
|            | 0.564673158047929  |   |                    |
| CDYL2      | 1.11339510547898   | 2 | 0.573098569936733  |
|            | 1.35881633309821   |   |                    |
| ZNF286B    | 2.0910858168763    | 2 | 0.351500934742826  |
|            | 1.43236582172004   |   |                    |
| GNG8       | 0.805234037344001  | 2 | 0.668568099397372  |
|            | 2.08278613004501   |   |                    |
| CPT1B      | 0.254391634686615  | 2 | 0.880561226553742  |
|            | 0.543208480234578  |   |                    |
| LINC00158  | 2.41252452707695   | 2 | 0.299313947880081  |
|            | 2.21808833768242   |   |                    |
| G0S2       | 0.772147750396368  | 2 | 0.67972030935291   |
|            | 24.9283425599971   |   |                    |
| SPARCL1    | 1.72719748751405   | 2 | 0.421641967308577  |
|            | 228.007653194115   |   |                    |
| MGARP      | 0.63150531251159   | 2 | 0.729239800765153  |
|            | 0.350904586414906  |   |                    |
| RPS6KA2    | 1.62557026500829   | 2 | 0.443620801336084  |
|            | 1.53880303312503   |   |                    |
| SCARF1     | 7.05178645970203   | 2 | 0.0294255118813045 |
|            | 2.95413359085583   |   |                    |
| TRERNA1    | 4.83288060336437   | 2 | 0.089238715643569  |
|            | 19.3995523359815   |   |                    |
| CLIP3      | 0.390320651729888  | 2 | 0.822702746952423  |
|            | 0.629050958461669  |   |                    |
| Z73429.1   | 1.80689677292592   | 2 | 0.405170064988422  |
|            | 9.73503925431461   |   |                    |
| RNF212     | 0.0855564886208859 | 2 | 0.958123835922537  |
|            | 0.160577375400157  |   |                    |
| XIST       | 8.51834881173904   | 2 | 0.0141339665143881 |
|            | 0.814265394142491  |   |                    |
| AC245123.1 | 2.28808353545531   | 2 | 0.318528996363001  |
|            | 2.05674468284287   |   |                    |
| AL512625.3 | 5.47933418989068   | 2 | 0.0645918462664569 |
|            | 1.58405017517364   |   |                    |
| AC243829.5 | 1.20126998533822   | 2 | 0.548463255349699  |
|            | 0.568782425799963  |   |                    |
| PLPP2      | 6.73173197482041   | 2 | 0.0345320988030533 |
|            | 3.23963428018851   |   |                    |
| CRYBB2     | 3.63569340503188   | 2 | 0.162375016477075  |
|            | 2.60629215476868   |   |                    |

TMPRSS15 1.74302622257958 2  
22.6550689744973

0.418318108282791
