# Supplementary material for: Distinct stage-specific transcriptional states of B cells derived from human tonsillar tissue
Source: JCI journal article supplement (doi:10.1172/jci.insight.155199), 2023-02-21
Supplement: sd6 [file 6]

| Donor Code | Sex    | Age |
|------------|--------|-----|
| Donor 1    | Male   | 33  |
| Donor 2    | Female | 33  |
| Donor 3    | Male   | 30  |
